# Supplementary material
Source: PubMed Central journal article supplement (PMC6589356)

### **Supplementary Dataset 1.**

The frequency represents the fraction of CCR base pairs that overlap an instance of the protein domain for each percentile bin (shown as 20 vigintiles). The first name is the full name of the domain, when applicable. The name in parentheses is the Pfam-A database name of the domain. The number after "N=" in parentheses represents the number of times the domain occurs throughout the genome. Statistics are not calculated if  $N < 3$ . The dotted line represents the expectation of 0.05 frequency for each vigintile. The Fisher's odds ratio is calculated using the number of intersections for the protein domain with the CCRs in the 95th percentile bin, and the number of intersections with other domains in that bin, as well as outside of that percentile bin for both the domain and other domains. The p-value is Bonferroni corrected across the 6,060 Pfam domains to show only the most significantly enriched domains genome-wide for constraint.

14-3-3 protein  
(14-3-3, N=7)

Fisher's OR: 5.82; Bonferroni p-val: 1.89e-05

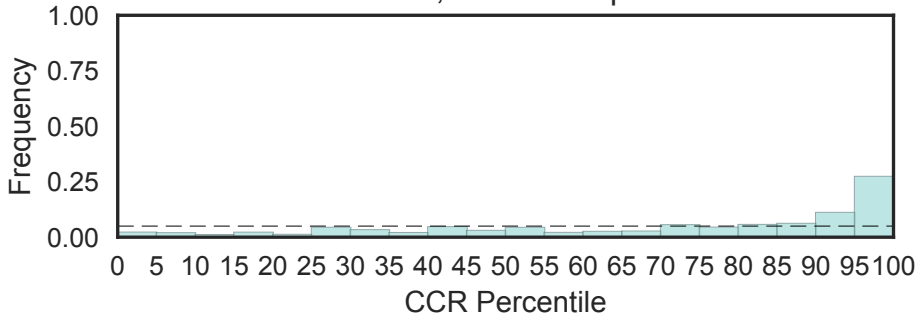

D-isomer specific 2-hydroxyacid dehydrogenase, catalytic domain  
(2-Hacid\_dh, N=4)

Fisher's OR: 1.43; Bonferroni p-val: 1

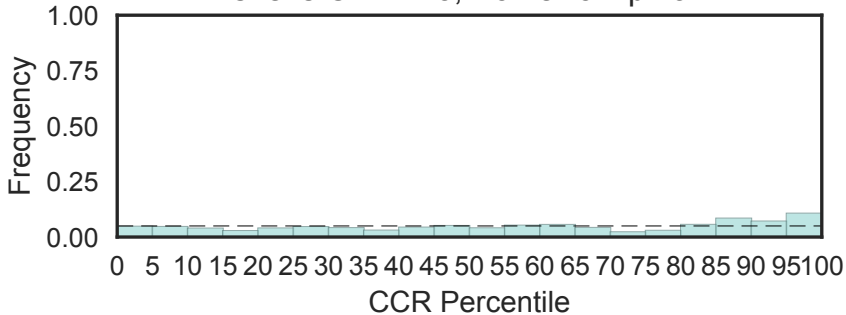

D-isomer specific 2-hydroxyacid dehydrogenase, NAD binding domain  
(2-Hacid\_dh\_C, N=8)

Fisher's OR: 1.39; Bonferroni p-val: 1

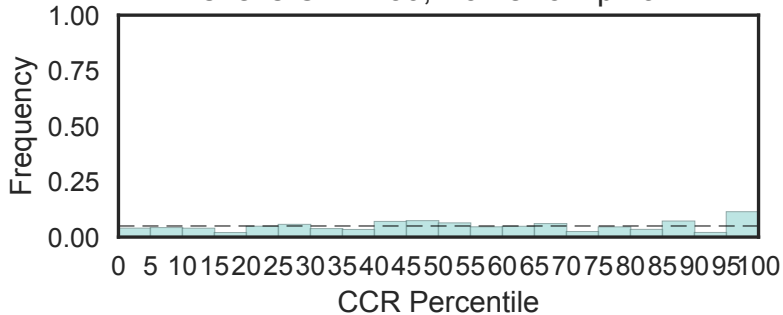



2-oxoacid dehydrogenases acyltransferase (catalytic domain)  
(2-oxoacid\_dh, N=4)

Fisher's OR: 0; Bonferroni p-val: 1

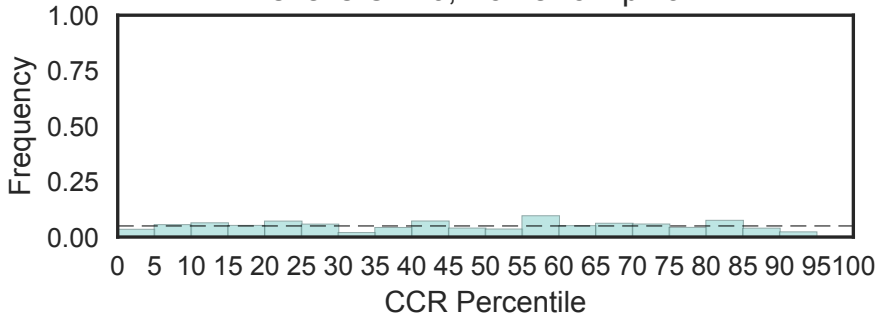

2-oxoglutarate dehydrogenase N-terminus  
(2-oxogl\_dehyd\_N, N=2)

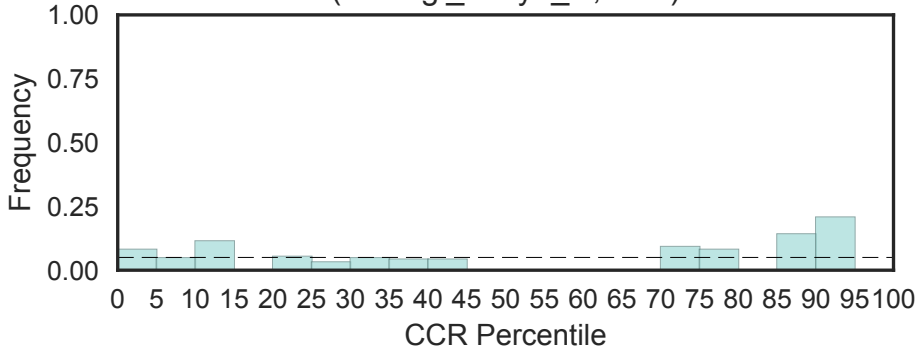

# Unstructured linker between I-set domains 2 and 3 on MYLCK (23ISL, N=1)

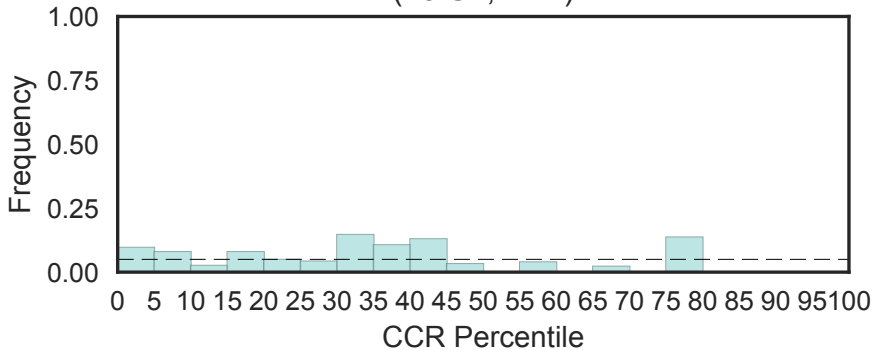

Thioredoxin-like [2Fe-2S] ferredoxin  
(2Fe-2S\_thioredx, N=1)

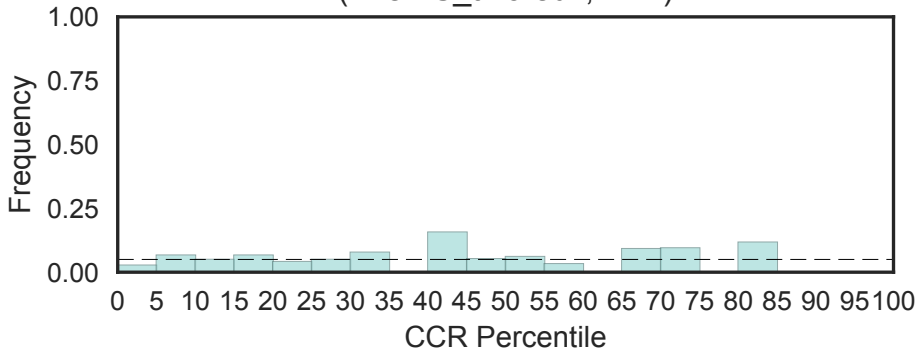

2OG-Fe(II) oxygenase superfamily  
(2OG-FeII\_Oxy, N=9)  
Fisher's OR: 1.6; Bonferroni p-val: 1

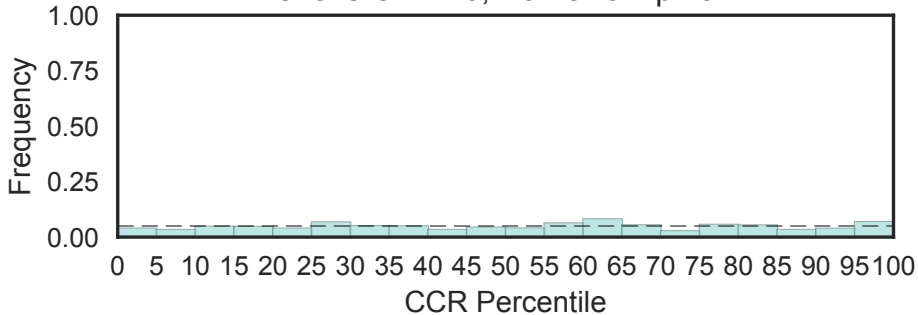

2OG-Fe(II) oxygenase superfamily  
(2OG-FeII\_Oxy\_2, N=7)

Fisher's OR: 1.11; Bonferroni p-val: 1

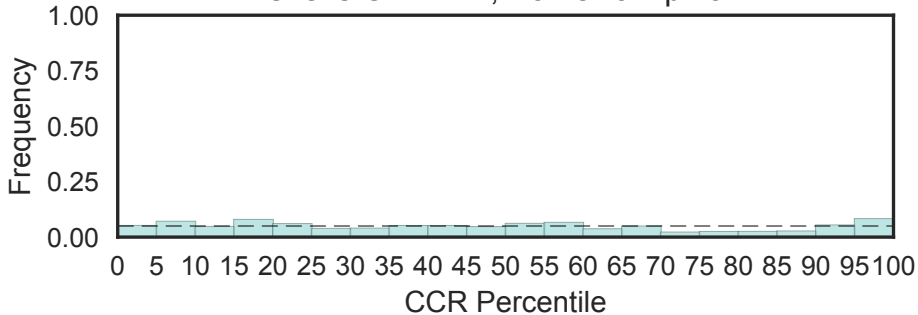

2OG-Fe(II) oxygenase superfamily  
(2OG-FeII\_Oxy\_3, N=12)  
Fisher's OR: 1.28; Bonferroni p-val: 1

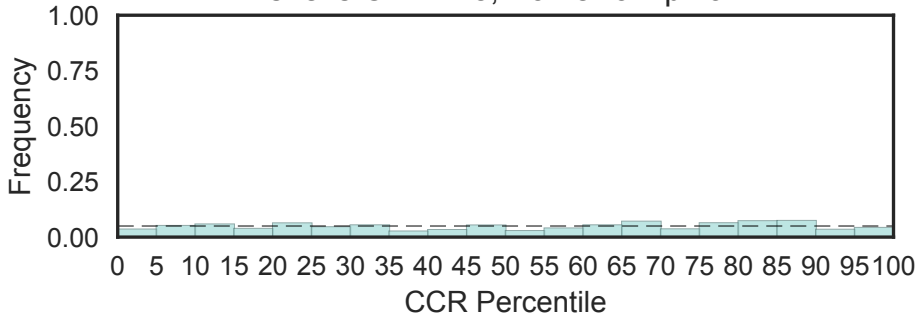

2OG-Fe(II) oxygenase superfamily  
(2OG-FeII\_Oxy\_4, N=4)  
Fisher's OR: 2.7; Bonferroni p-val: 1

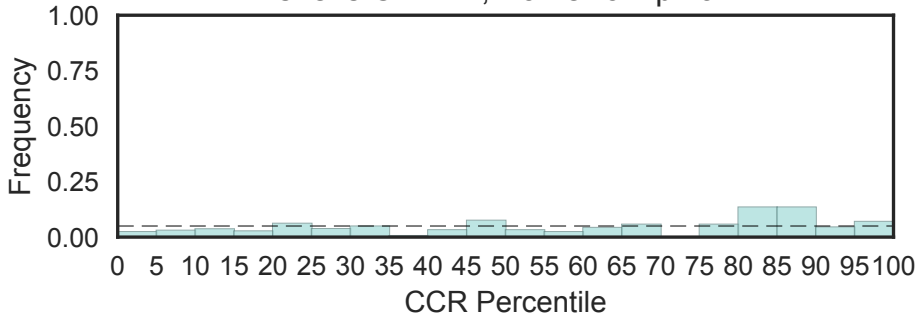



3-hydroxyanthranilic acid dioxygenase  
(3-HAO, N=1)

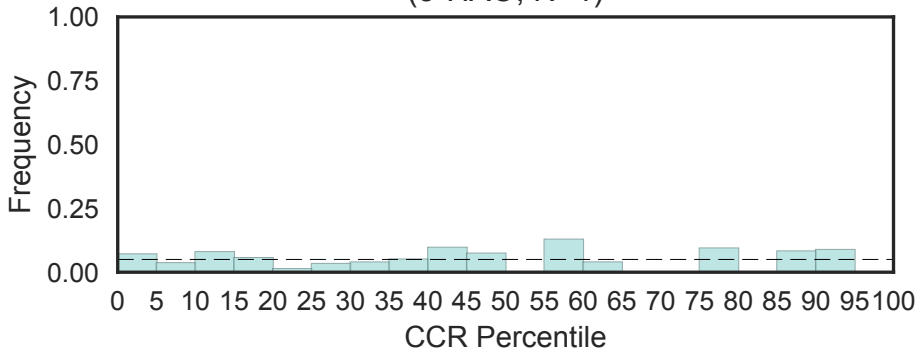

Myotubularin-associated protein  
(3-PAP, N=3)

Fisher's OR: 0; Bonferroni p-val: 1

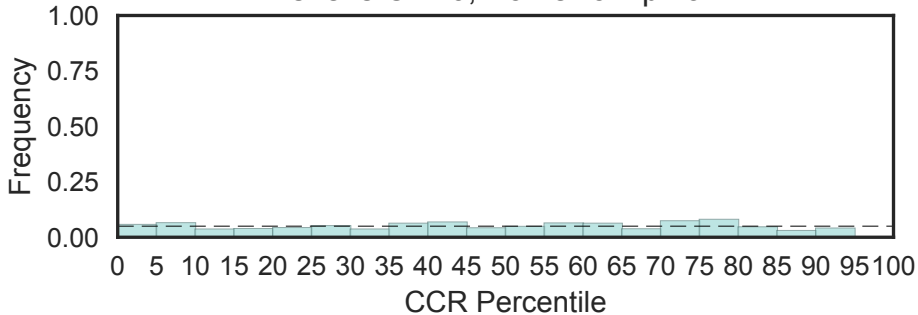

3-beta hydroxysteroid dehydrogenase/isomerase family  
(3Beta\_HSD, N=10)

Fisher's OR: 0.24; Bonferroni p-val: 1

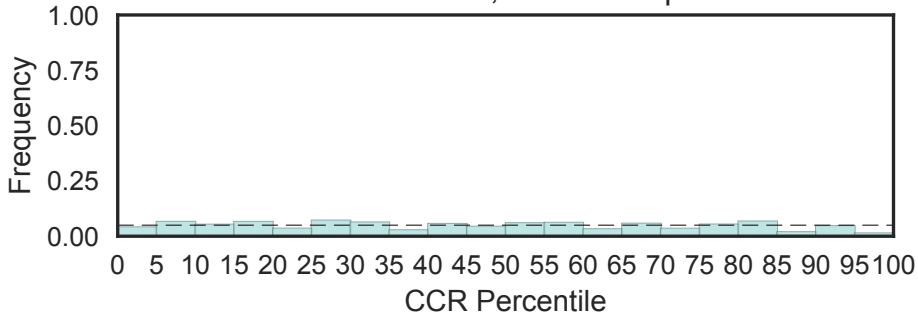

3-hydroxyacyl-CoA dehydrogenase, C-terminal domain  
(3HCDH, N=6)

Fisher's OR: 0; Bonferroni p-val: 1

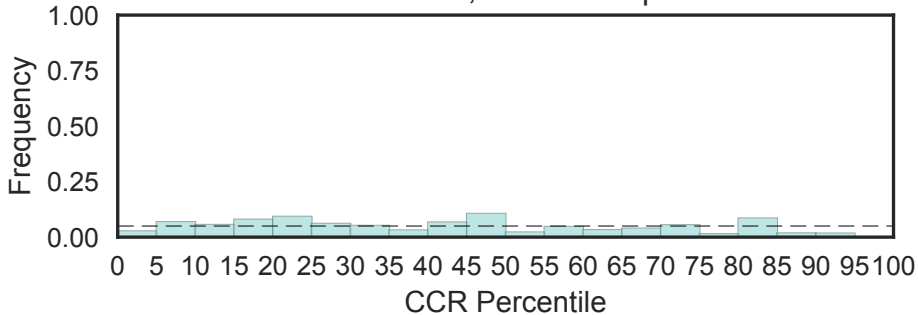

3-hydroxyacyl-CoA dehydrogenase, NAD binding domain  
(3HCDH\_N, N=4)

Fisher's OR: 0; Bonferroni p-val: 1

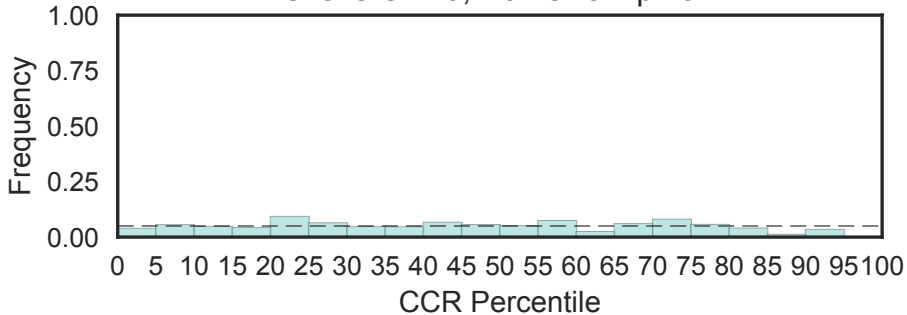

40S ribosomal protein SA C-terminus  
(40S\_SA\_C, N=2)

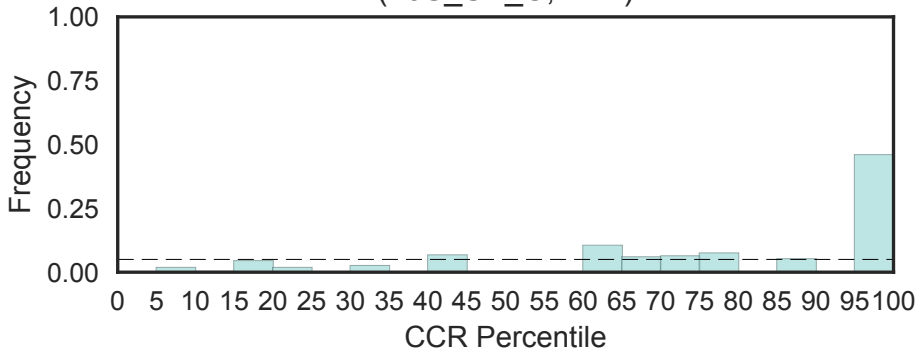

4F5 protein family  
(4F5, N=4)

Fisher's OR: 16.6; Bonferroni p-val: 1

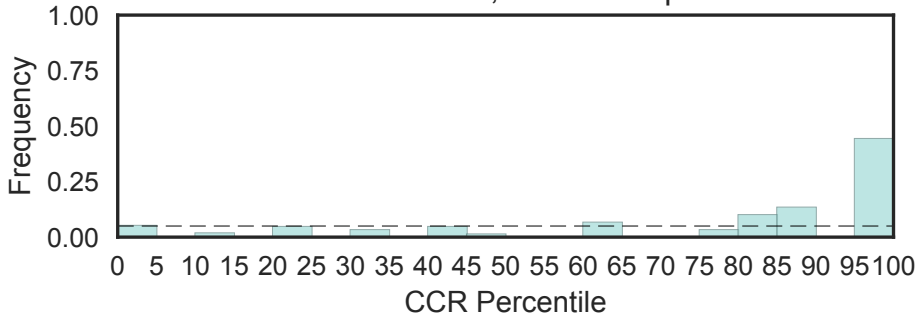

# Thioesterase superfamily

(4HBT, N=9)

Fisher's OR: 0; Bonferroni p-val: 1

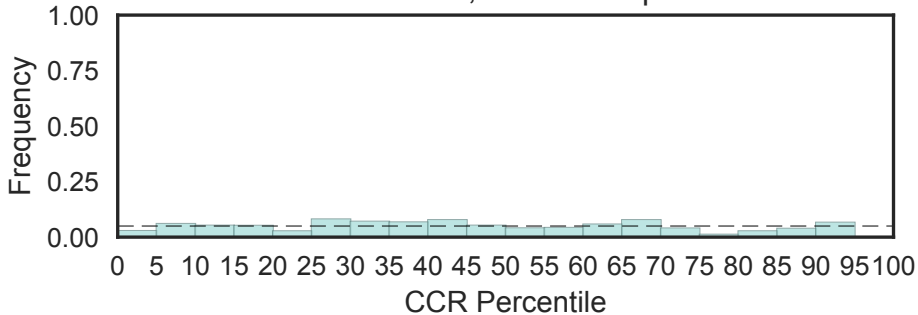



Thioesterase-like superfamily  
(4HBT\_2, N=1)

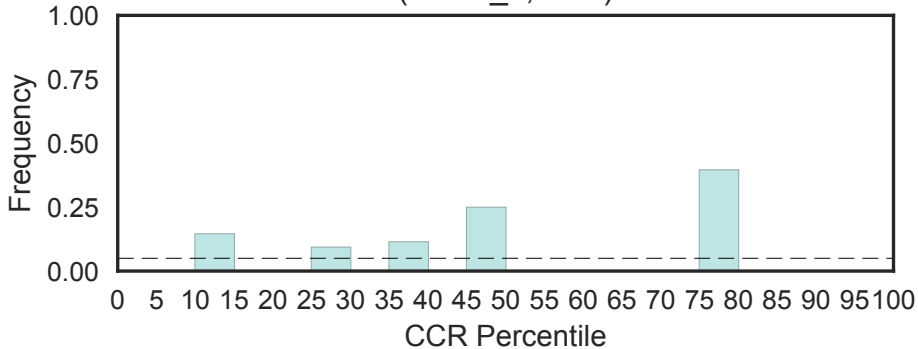

Thioesterase-like superfamily  
(4HBT\_3, N=2)

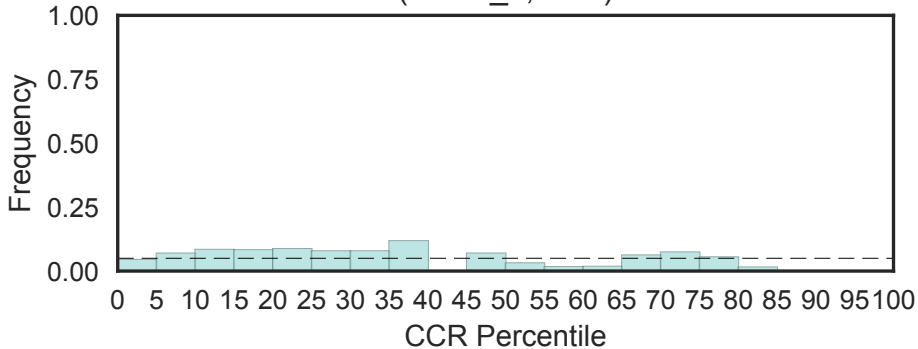

4.1 protein C-terminal domain (CTD)  
(4\_1\_CTD, N=4)

Fisher's OR: 0; Bonferroni p-val: 1

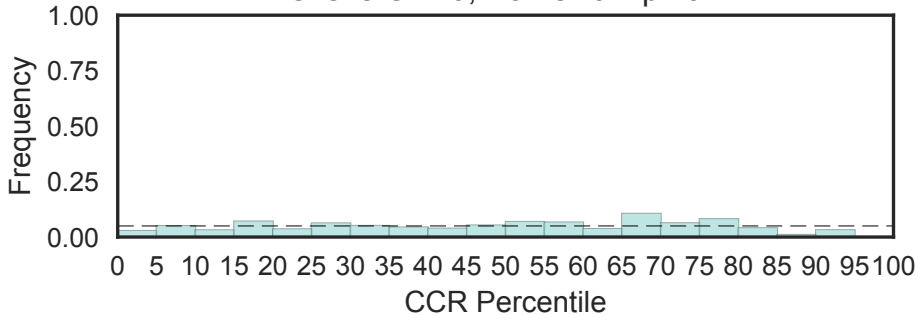

5-formyltetrahydrofolate cyclo-ligase family  
(5-FTHF\_cyc-lig, N=4)

Fisher's OR: 0.726; Bonferroni p-val: 1

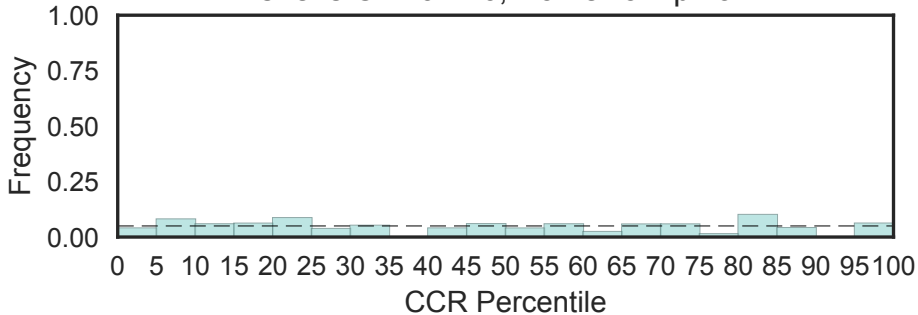

5'-nucleotidase  
(5-nucleotidase, N=4)  
Fisher's OR: 0.678; Bonferroni p-val: 1

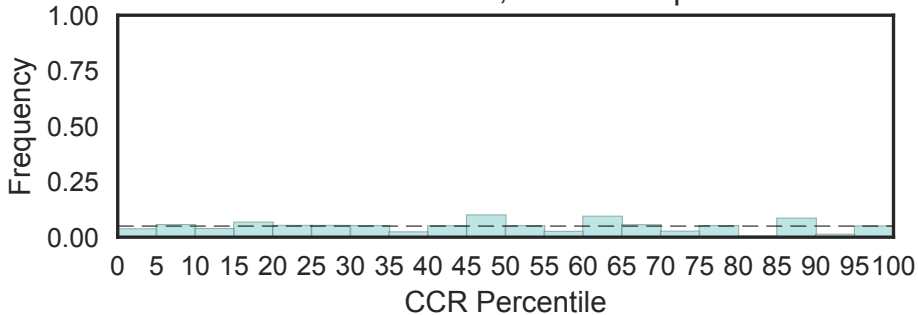

Tumour suppressor p53-binding protein-1 Tudor  
(53-BP1\_Tudor, N=1)

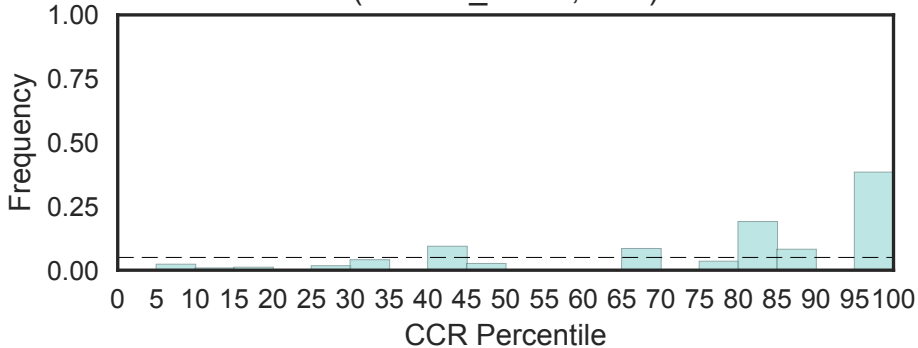

# Serotonin (5-HT) neurotransmitter transporter, N-terminus (5HT\_transport\_N, N=1)

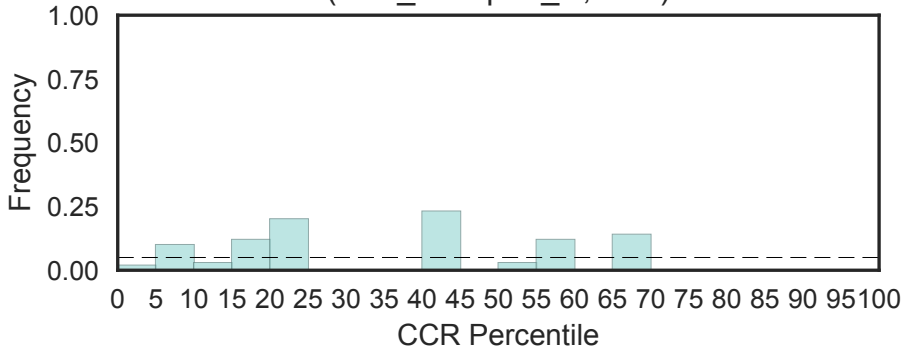

5' nucleotidase family  
(5\_nucleotid, N=8)

Fisher's OR: 0.0957; Bonferroni p-val: 1

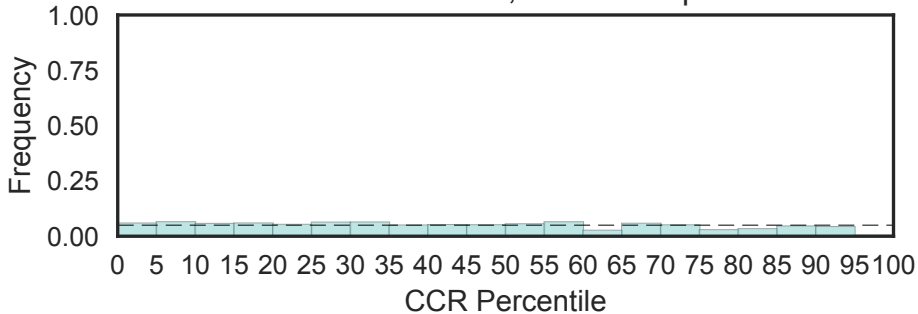



5'-nucleotidase, C-terminal domain  
(5\_nucleotid\_C, N=1)

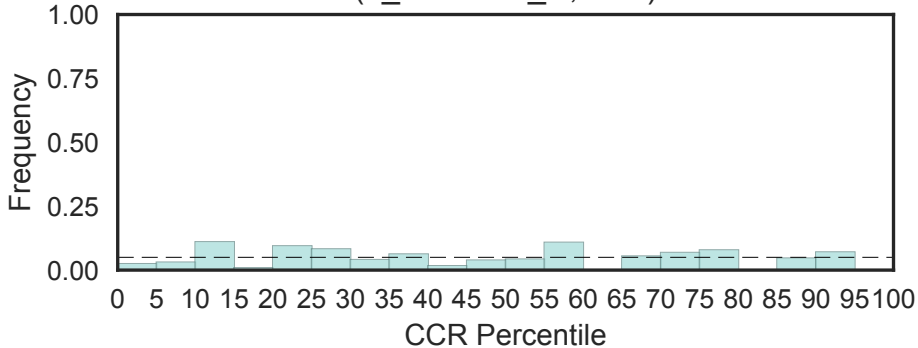

60Kd inner membrane protein  
(60KD\_IMP, N=2)

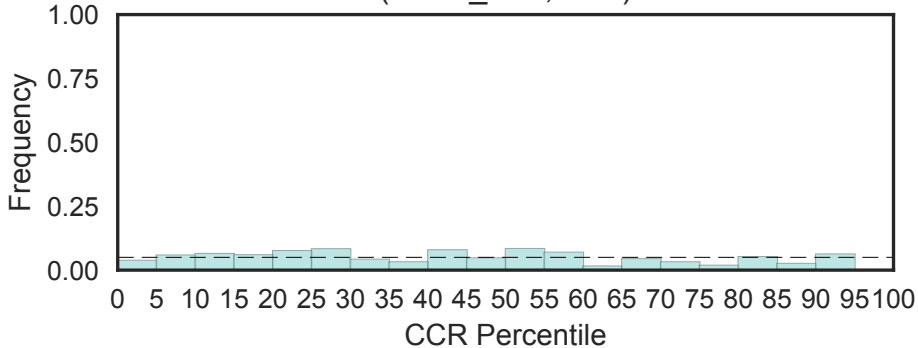

6-phosphofructo-2-kinase  
(6PF2K, N=3)

Fisher's OR: 0; Bonferroni p-val: 1

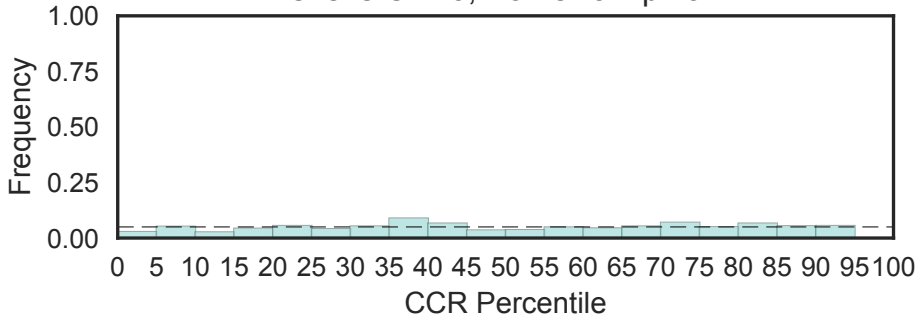

# 6-phosphogluconate dehydrogenase, C-terminal domain (6PGD, N=1)

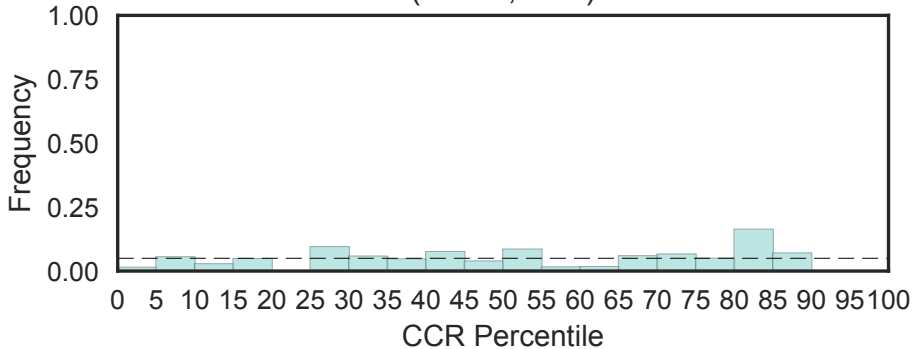

Serpentine type 7TM GPCR chemoreceptor Srsx  
(7TM\_GPCR\_Srsx, N=252)

Fisher's OR: 0.308; Bonferroni p-val: 2.37e-24

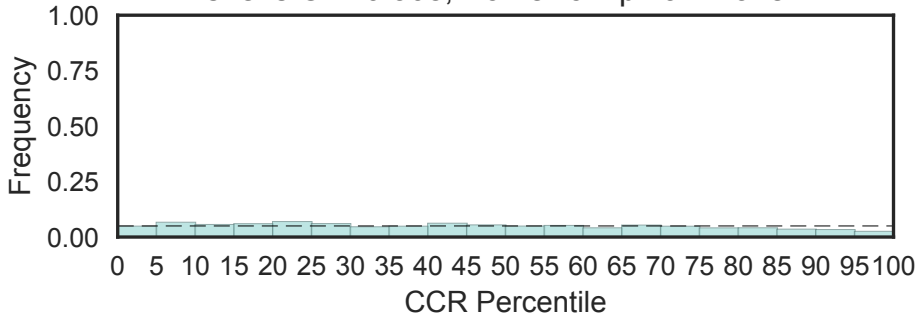

Serpentine type 7TM GPCR chemoreceptor Srv  
(7TM\_GPCR\_Srv, N=29)

Fisher's OR: 0.214; Bonferroni p-val: 0.0813

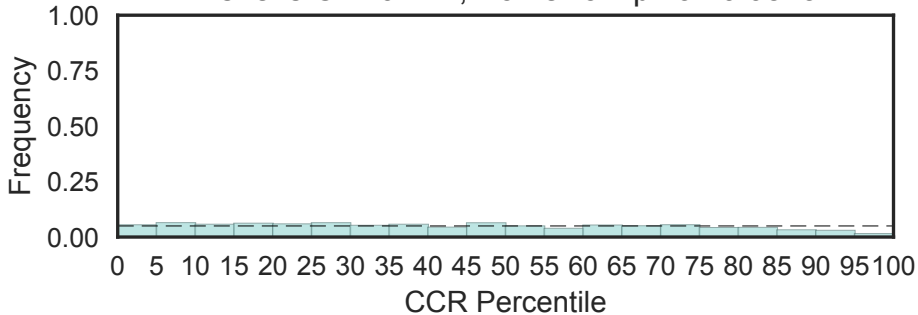

Serpentine type 7TM GPCR chemoreceptor Srw  
(7TM\_GPCR\_Srw, N=8)

Fisher's OR: 0; Bonferroni p-val: 1

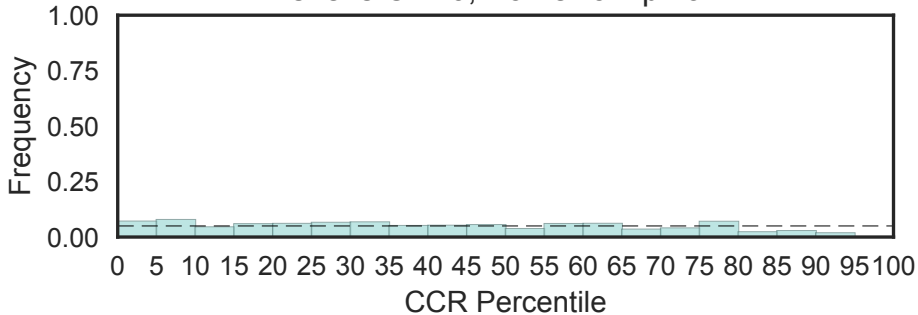

Serpentine type 7TM GPCR chemoreceptor Srx  
(7TM\_GPCR\_Srx, N=54)

Fisher's OR: 0.826; Bonferroni p-val: 1

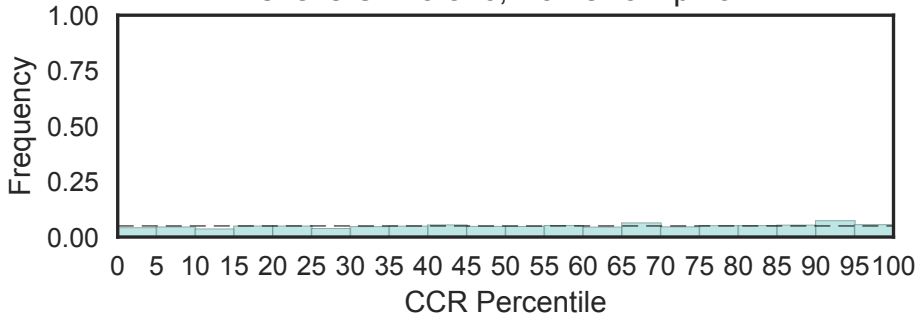



7 transmembrane receptor (rhodopsin family)  
(7tm\_1, N=639)

Fisher's OR: 0.215; Bonferroni p-val: 5.42e-103

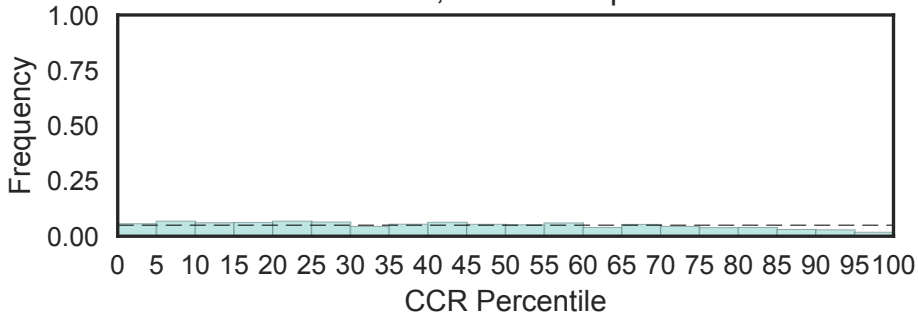

7 transmembrane receptor (Secretin family)  
(7tm\_2, N=49)

Fisher's OR: 0.467; Bonferroni p-val: 1

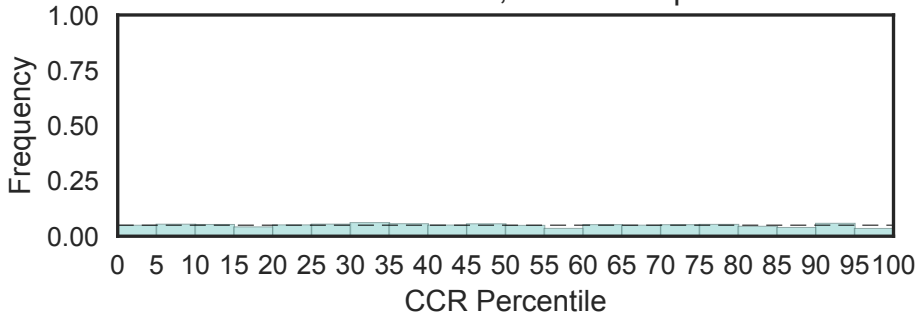

7 transmembrane sweet-taste receptor of 3 GCPR  
(7tm\_3, N=23)

Fisher's OR: 0.739; Bonferroni p-val: 1

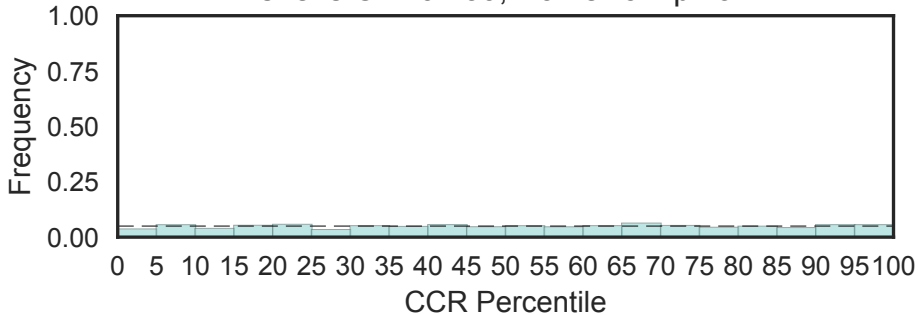

Olfactory receptor  
(7tm\_4, N=400)

Fisher's OR: 0.0184; Bonferroni p-val: 4.23e-145

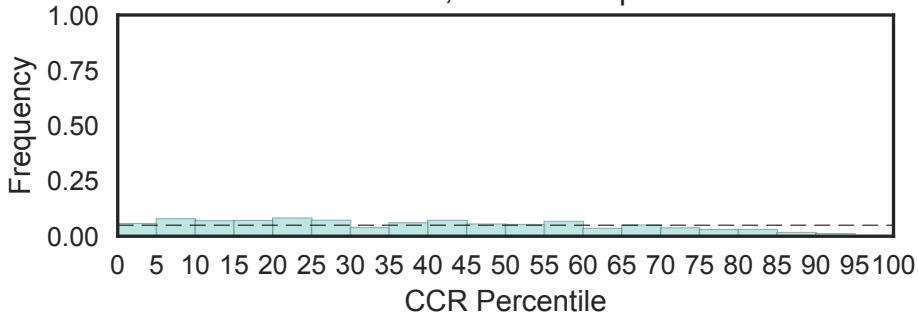

A1 Propeptide  
(A1\_Propeptide, N=7)  
Fisher's OR: 0; Bonferroni p-val: 1

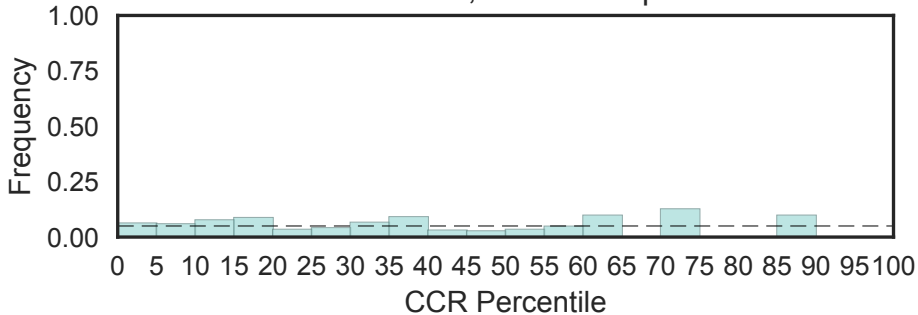

Alpha-2-macroglobulin family  
(A2M, N=9)

Fisher's OR: 0; Bonferroni p-val: 1

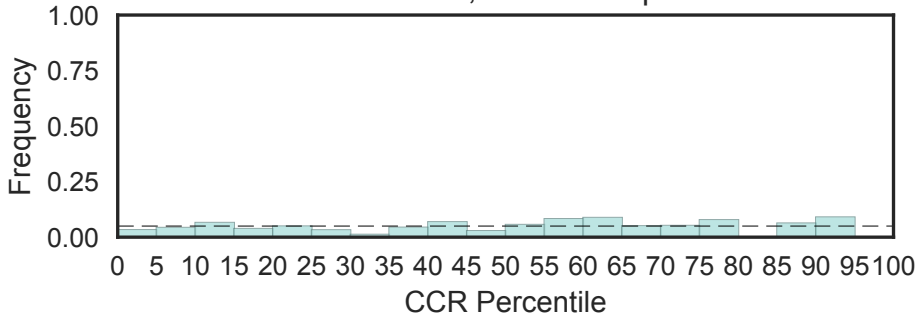

MG2 domain  
(A2M\_N, N=9)

Fisher's OR: 0.392; Bonferroni p-val: 1

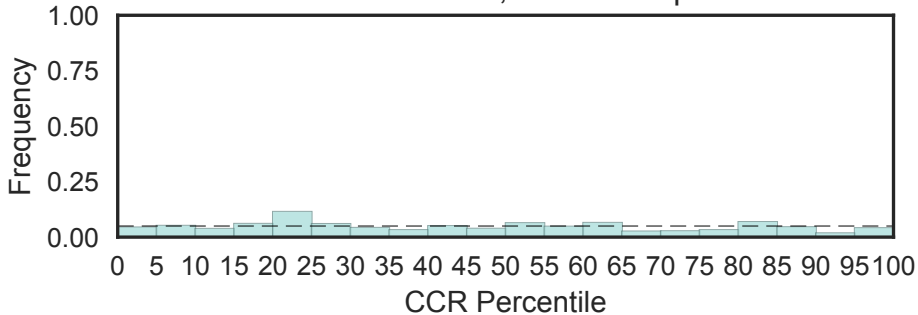

Alpha-2-macroglobulin family N-terminal region  
(A2M\_N\_2, N=9)

Fisher's OR: 0.563; Bonferroni p-val: 1

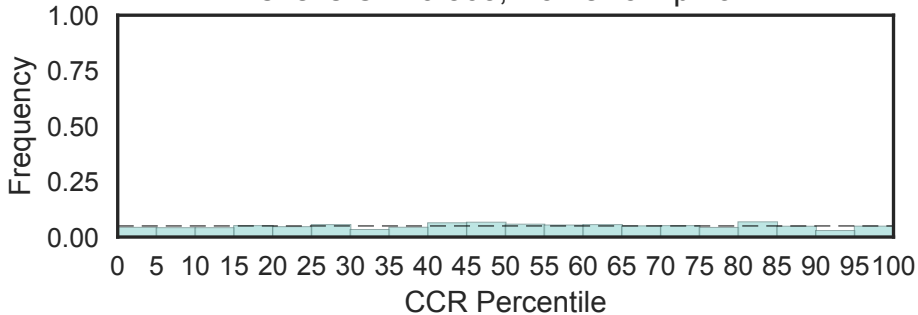



A-macroglobulin complement component  
(A2M\_comp, N=9)

Fisher's OR: 0.324; Bonferroni p-val: 1

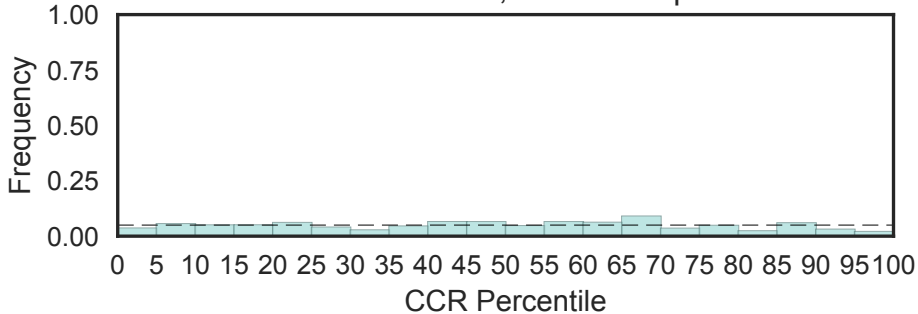

A-macroglobulin receptor  
(A2M\_recep, N=9)

Fisher's OR: 1.47; Bonferroni p-val: 1

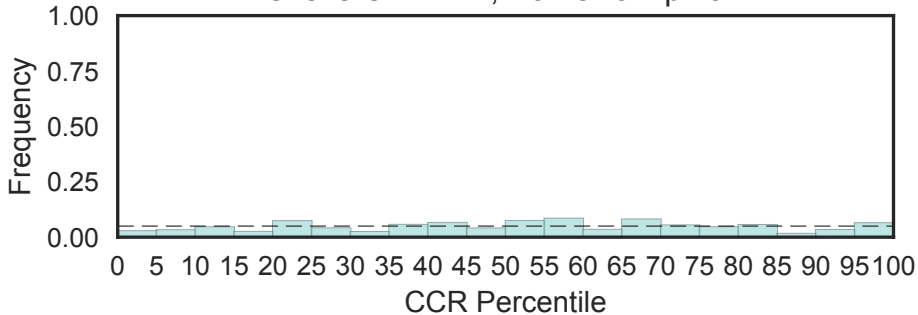

ATPase family associated with various cellular activities (AAA)  
(AAA, N=64)

Fisher's OR: 2.88; Bonferroni p-val: 6.71e-08

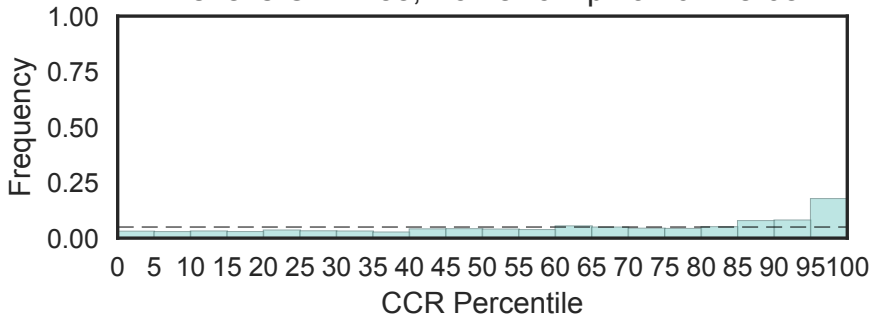

AAA domain  
(AAA\_11, N=16)

Fisher's OR: 2.15; Bonferroni p-val: 1

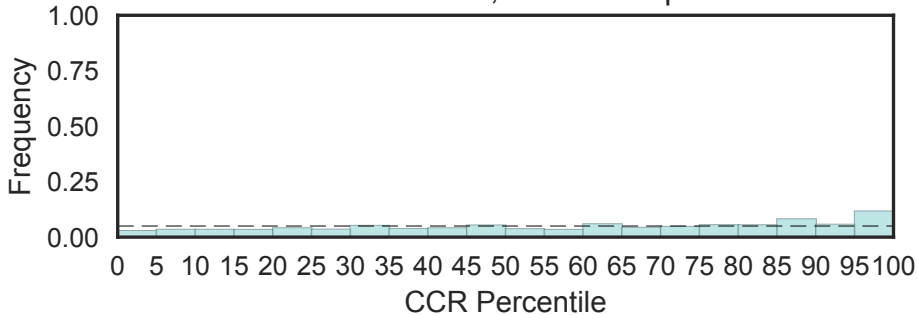

AAA domain  
(AAA\_12, N=12)

Fisher's OR: 1.86; Bonferroni p-val: 1

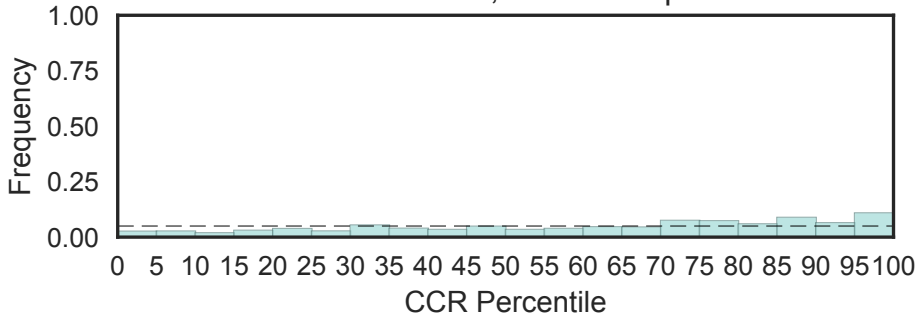

AAA domain  
(AAA\_14, N=1)

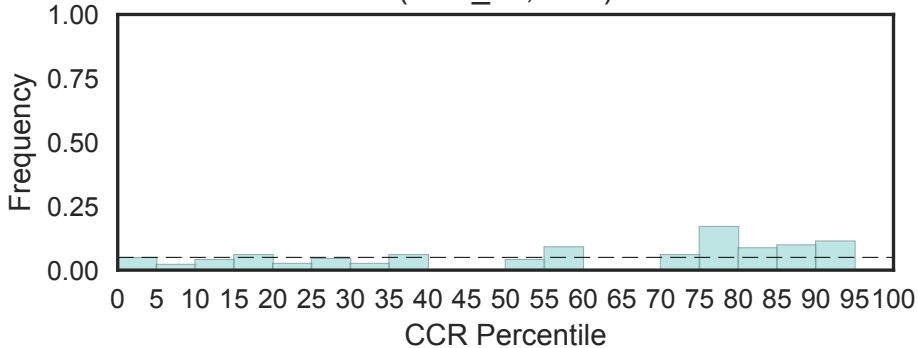

AAA ATPase domain  
(AAA\_15, N=3)

Fisher's OR: 5.69; Bonferroni p-val: 0.0179

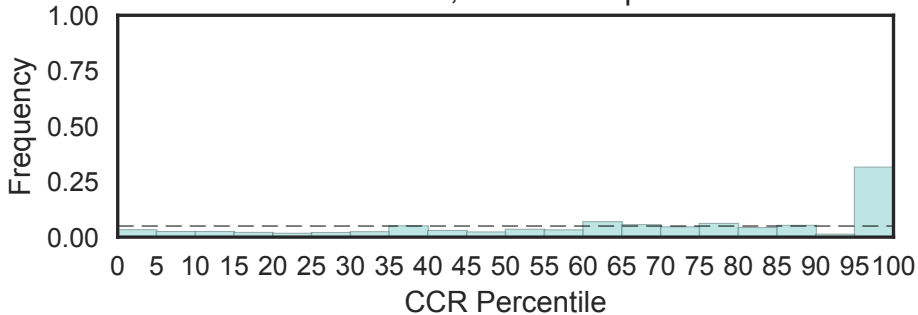

AAA ATPase domain  
(AAA\_16, N=4)

Fisher's OR: 0; Bonferroni p-val: 1

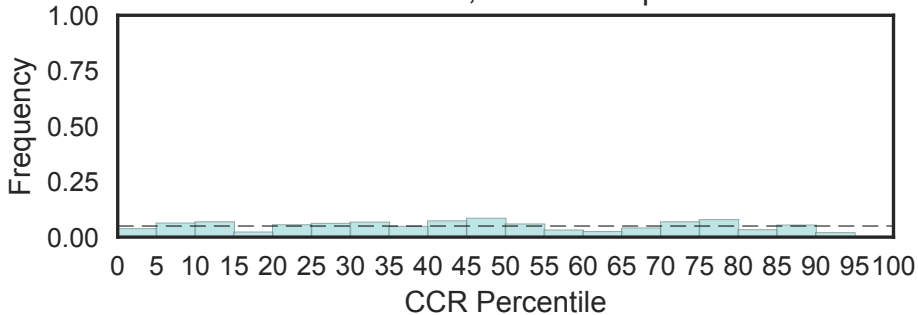



AAA domain  
(AAA\_17, N=11)

Fisher's OR: 1.22; Bonferroni p-val: 1

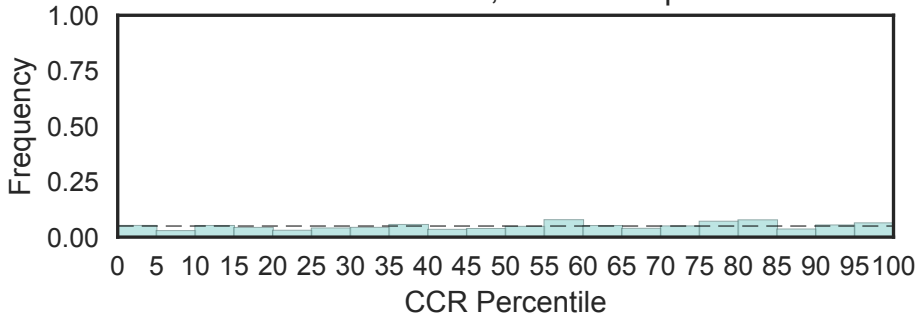

AAA domain  
(AAA\_18, N=10)

Fisher's OR: 1.16; Bonferroni p-val: 1

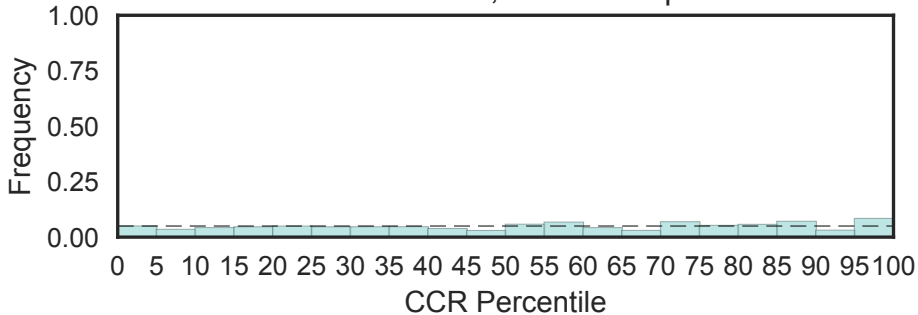

AAA domain  
(AAA\_19, N=12)

Fisher's OR: 2.03; Bonferroni p-val: 1

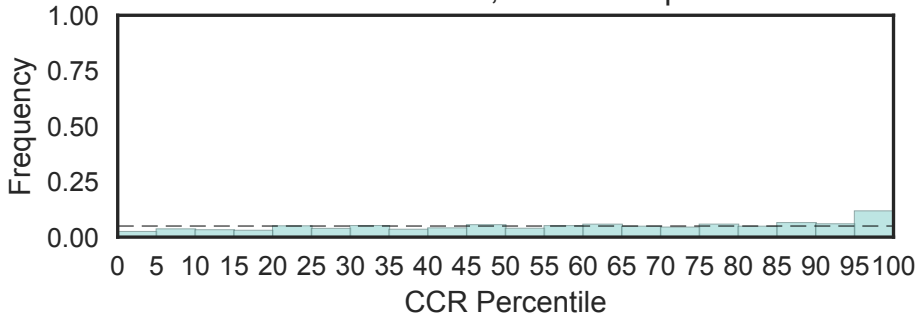

AAA domain (Cdc48 subfamily)  
(AAA\_2, N=14)

Fisher's OR: 5.73; Bonferroni p-val: 2.46e-05

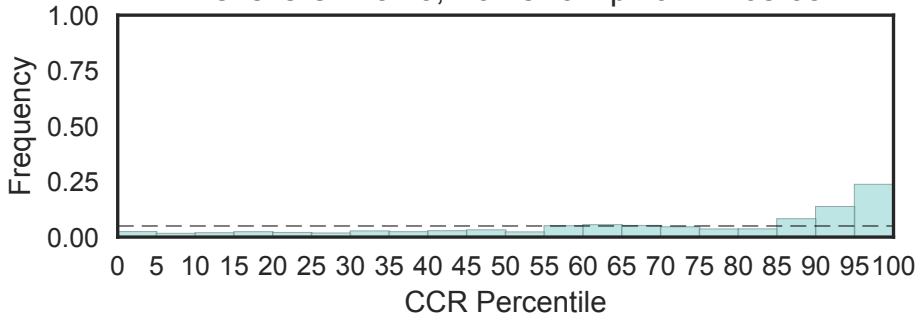

AAA domain, putative AbiEii toxin, Type IV TA system  
(AAA\_21, N=13)

Fisher's OR: 1.47; Bonferroni p-val: 1

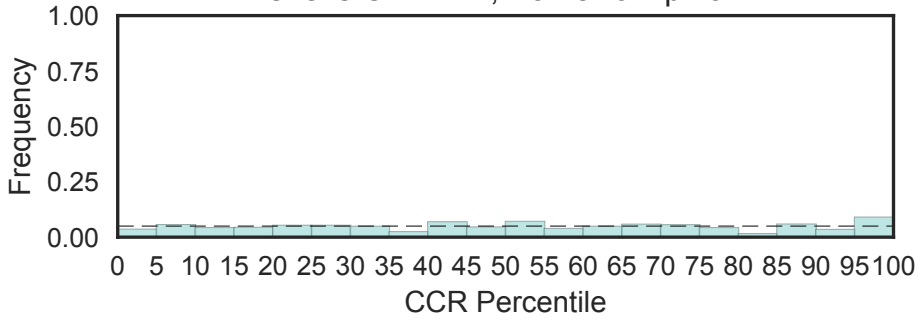

AAA domain  
(AAA\_22, N=7)

Fisher's OR: 0.693; Bonferroni p-val: 1

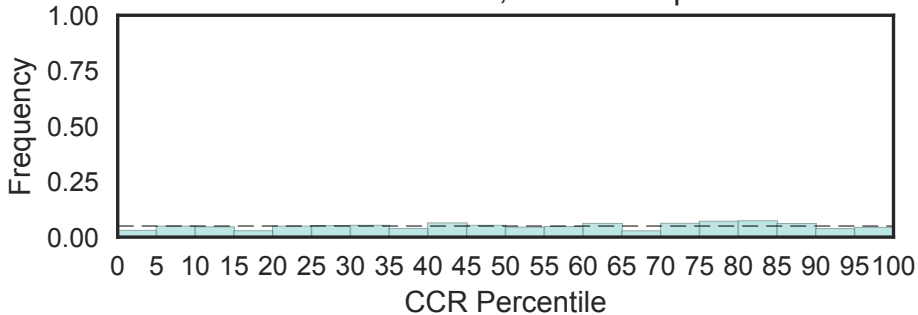

AAA domain  
(AAA\_23, N=6)

Fisher's OR: 3.85; Bonferroni p-val: 0.057

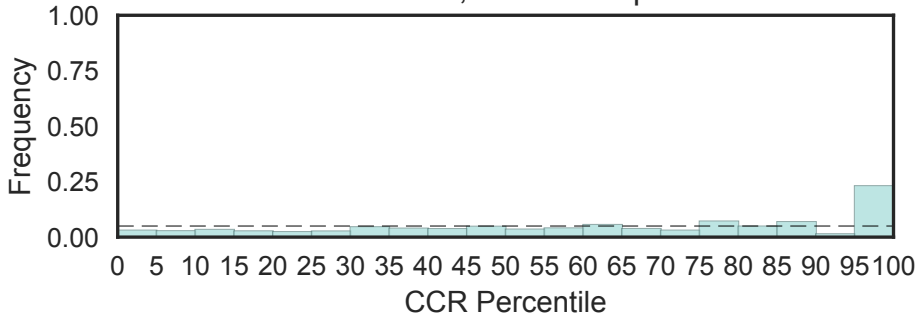

AAA domain  
(AAA\_24, N=1)

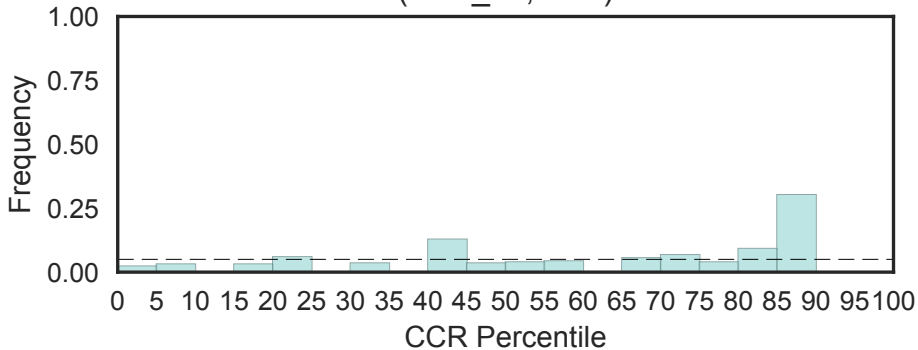



AAA domain  
(AAA\_25, N=8)

Fisher's OR: 0.916; Bonferroni p-val: 1

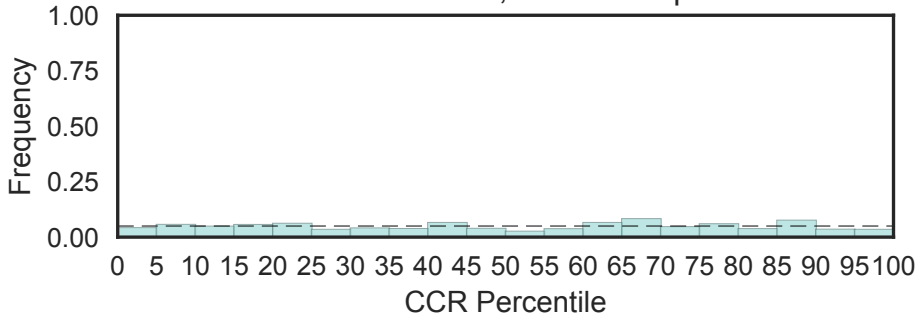

ATPase family associated with various cellular activities (AAA)  
(AAA\_3, N=5)

Fisher's OR: 0; Bonferroni p-val: 1

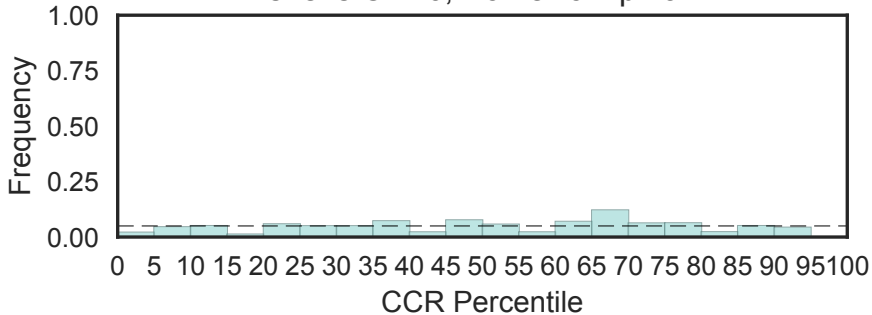

AAA domain  
(AAA\_30, N=8)

Fisher's OR: 1.74; Bonferroni p-val: 1

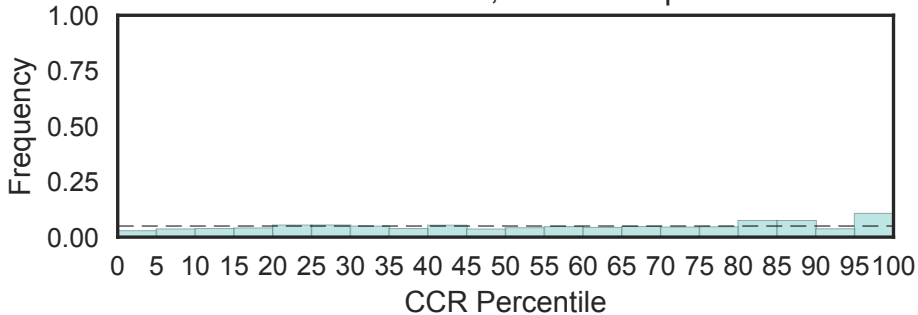

AAA domain  
(AAA\_31, N=3)

Fisher's OR: 8.65; Bonferroni p-val: 1

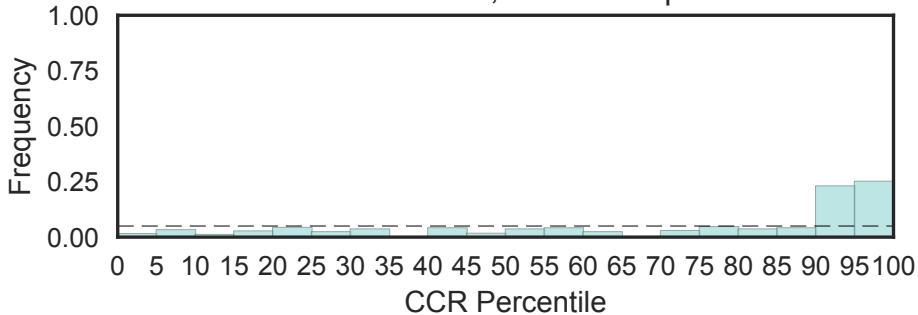

AAA domain  
(AAA\_33, N=18)

Fisher's OR: 1.57; Bonferroni p-val: 1

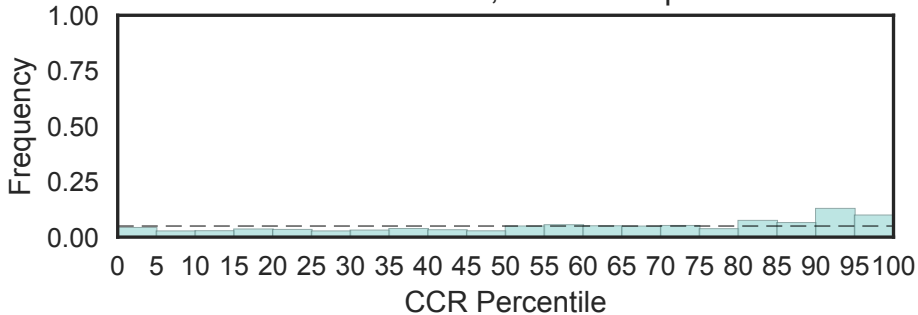

P-loop containing NTP hydrolase pore-1  
(AAA\_34, N=2)

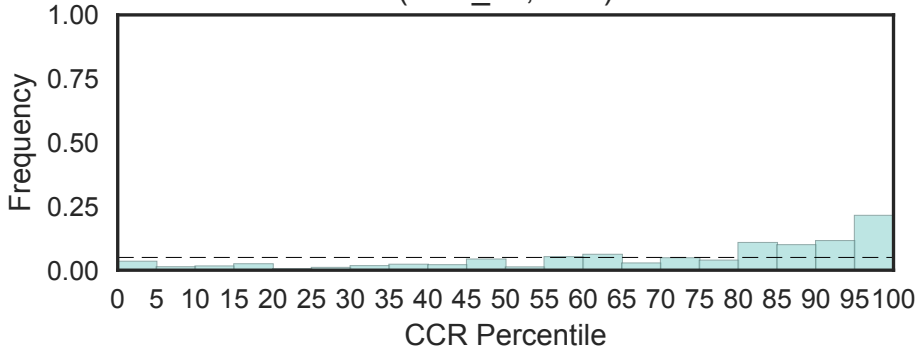

AAA domain (dynein-related subfamily)  
(AAA\_5, N=52)

Fisher's OR: 1.63; Bonferroni p-val: 1

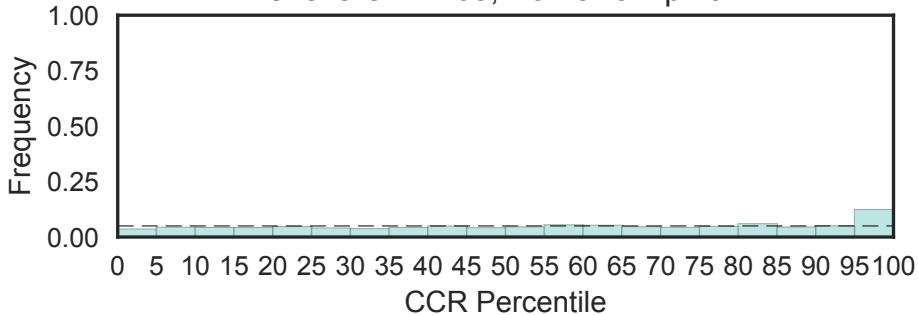

Hydrolytic ATP binding site of dynein motor region D1  
(AAA\_6, N=17)

Fisher's OR: 0.869; Bonferroni p-val: 1

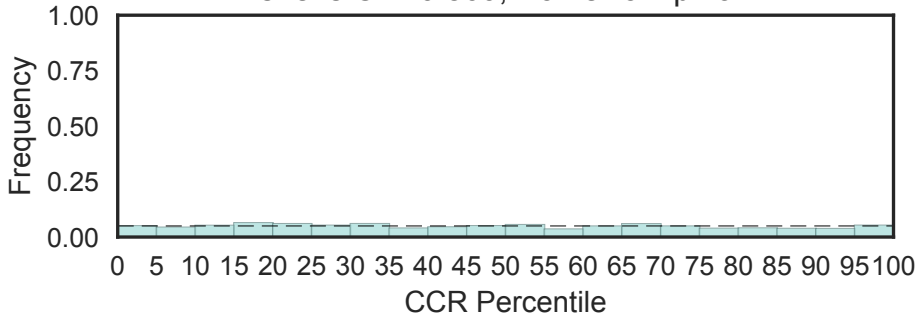



P-loop containing dynein motor region D3  
(AAA\_7, N=16)

Fisher's OR: 0.489; Bonferroni p-val: 1

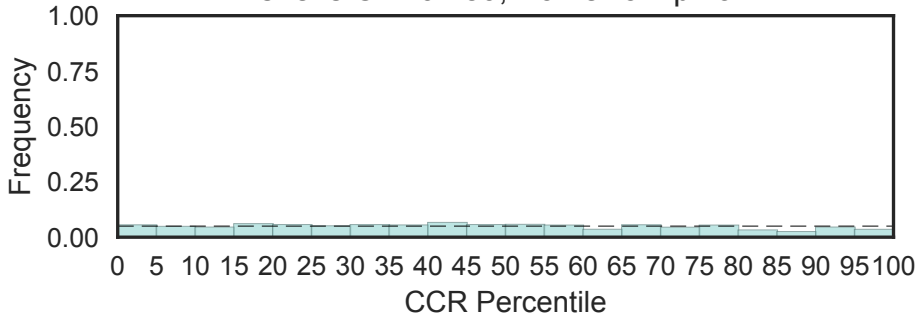

P-loop containing dynein motor region D4  
(AAA\_8, N=16)

Fisher's OR: 0.732; Bonferroni p-val: 1

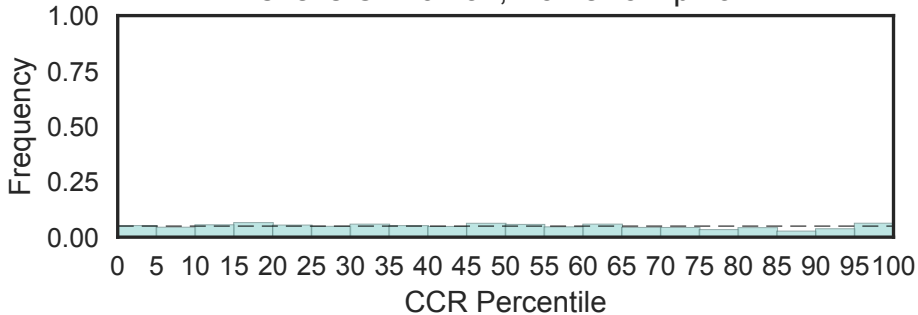

ATP-binding dynein motor region D5  
(AAA\_9, N=14)

Fisher's OR: 0.476; Bonferroni p-val: 1

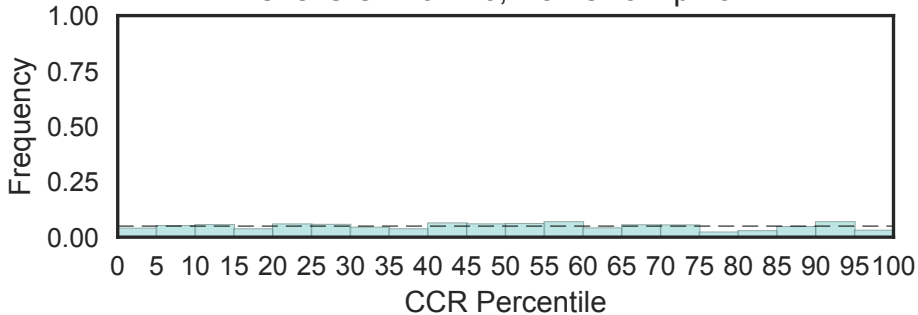

PrkA AAA domain  
(AAA\_PrkA, N=1)

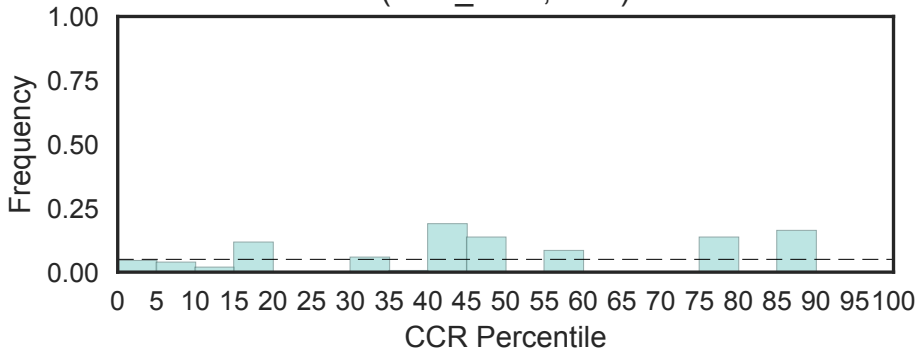

AAA C-terminal domain  
(AAA\_assoc\_2, N=1)

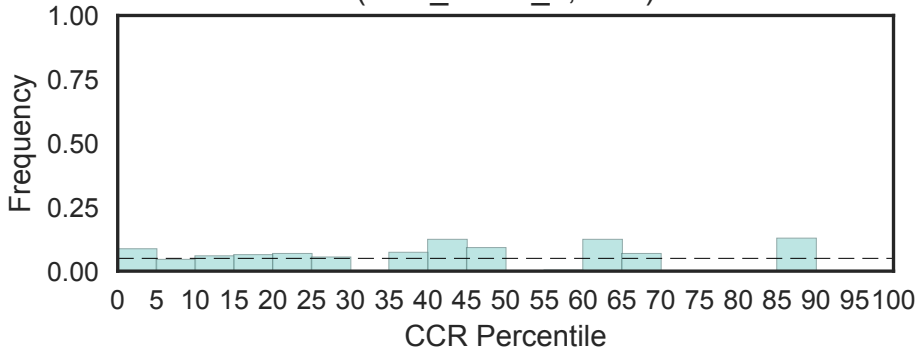

AAR2 protein  
(AAR2, N=1)

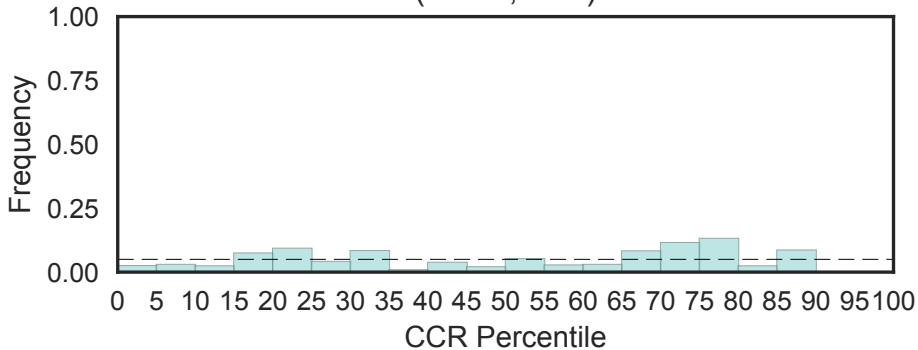

AARP2CN (NUC121) domain  
(AARP2CN, N=2)

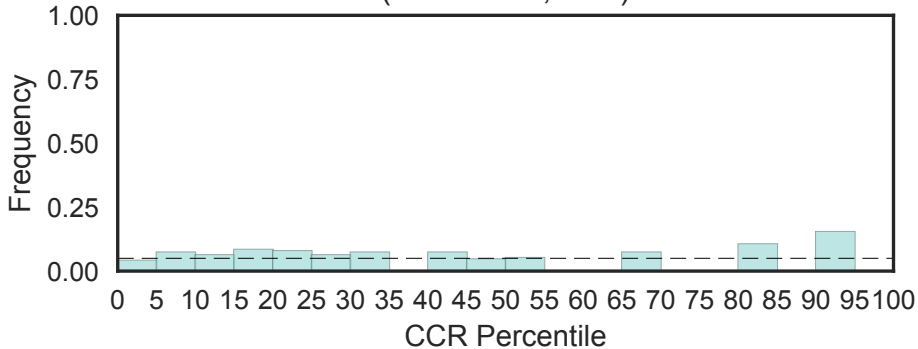

Apoptosis antagonizing transcription factor  
(AATF-Che1, N=1)

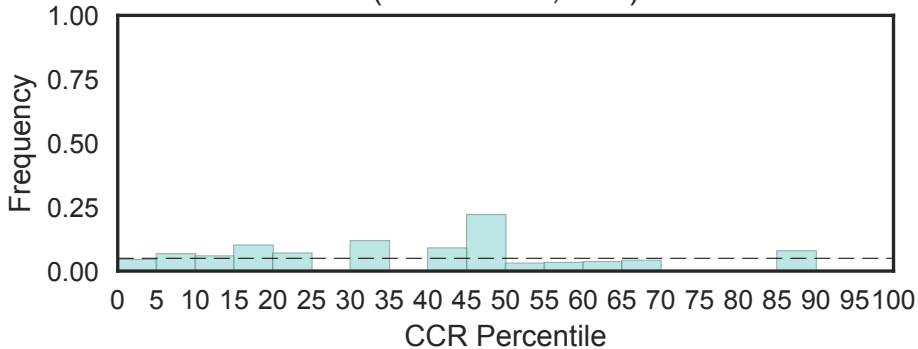



Amino acid kinase family  
(AA\_kinase, N=1)

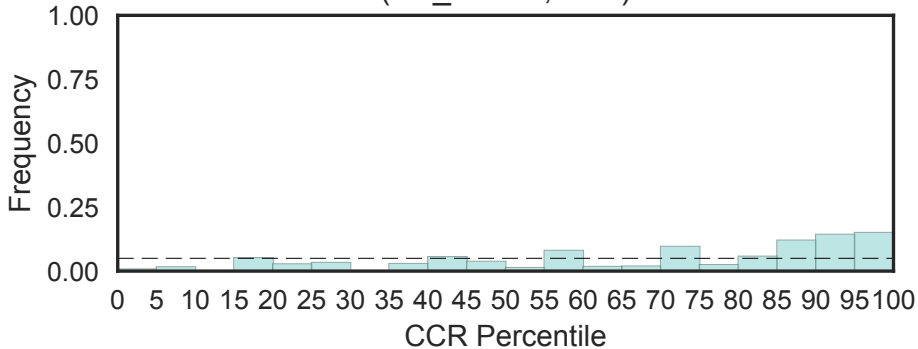

Amino acid permease  
(AA\_permease, N=25)

Fisher's OR: 0.516; Bonferroni p-val: 1

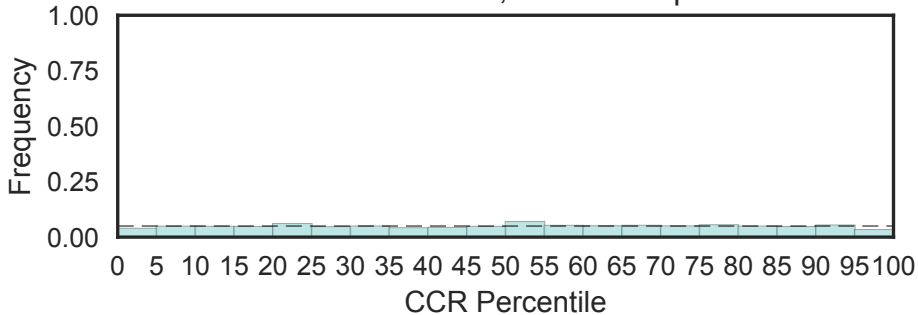

Amino acid permease  
(AA\_permease\_2, N=17)  
Fisher's OR: 0.413; Bonferroni p-val: 1

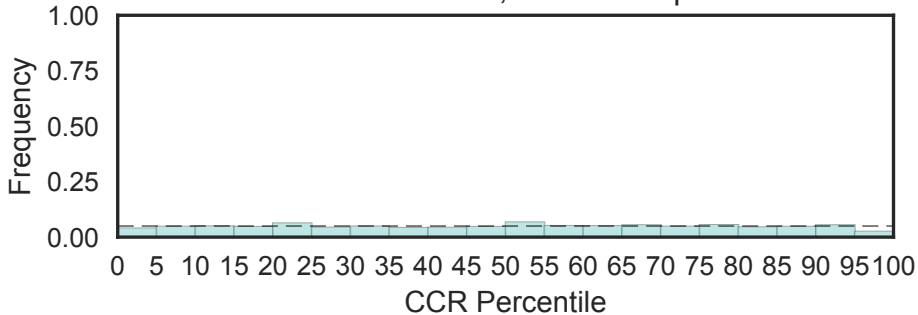

C-terminus of AA\_permease  
(AA\_permease\_C, N=5)  
Fisher's OR: 1.11; Bonferroni p-val: 1

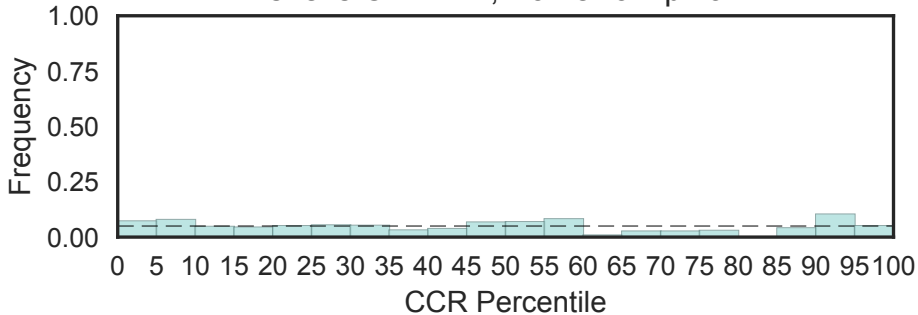

Amino acid permease N-terminal  
(AA\_permease\_N, N=3)  
Fisher's OR: 0; Bonferroni p-val: 1

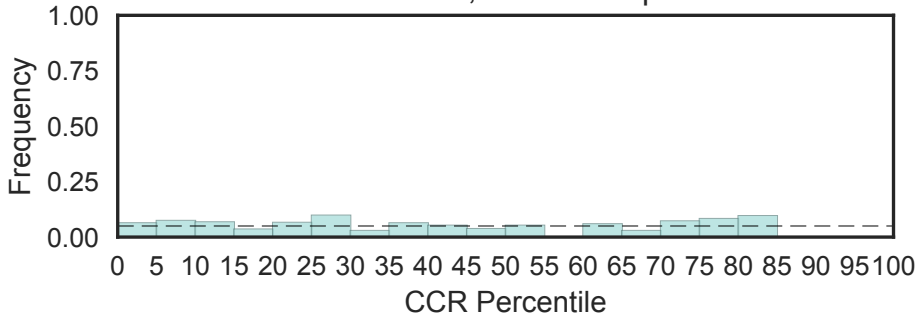

ABC1 family  
(ABC1, N=5)

Fisher's OR: 0.841; Bonferroni p-val: 1

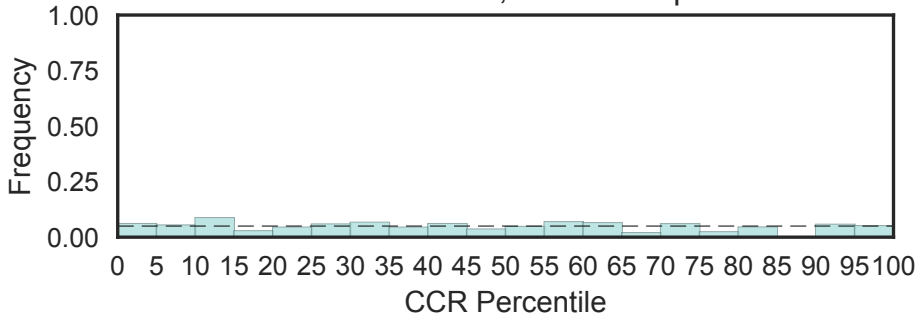

ABC-2 type transporter  
(ABC2\_membrane, N=5)

Fisher's OR: 0.225; Bonferroni p-val: 1

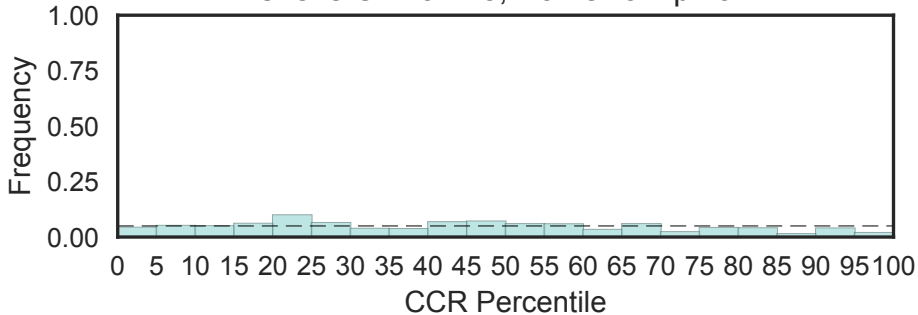

ABC-2 family transporter protein  
(ABC2\_membrane\_3, N=24)  
Fisher's OR: 0.5; Bonferroni p-val: 1

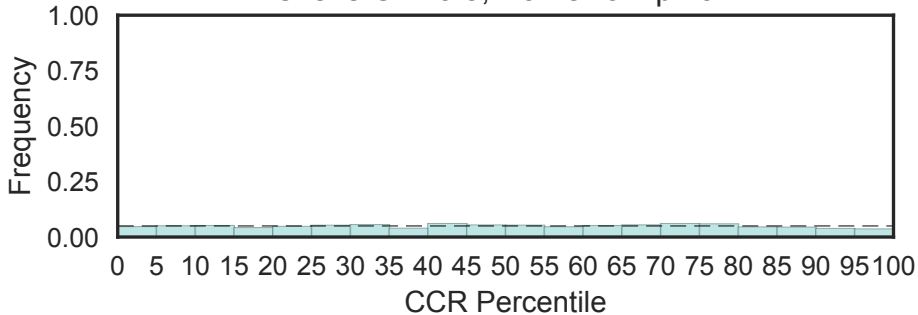



Predicted ATPase of the ABC class  
(ABC\_ATPase, N=2)

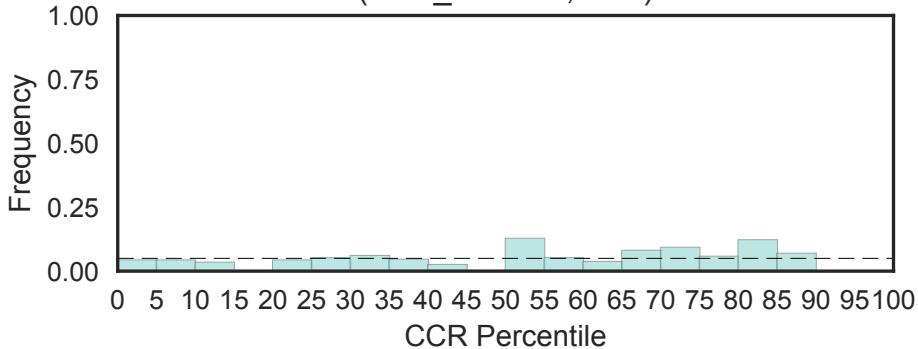

ABC transporter transmembrane region  
(ABC\_membrane, N=38)

Fisher's OR: 0.359; Bonferroni p-val: 0.101

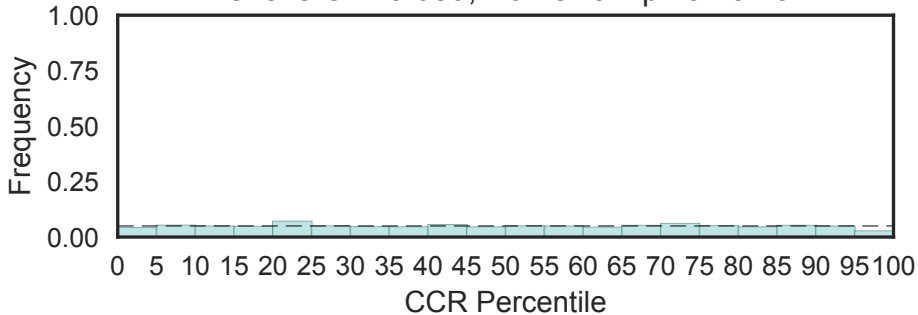

ABC transporter transmembrane region 2  
(ABC\_membrane\_2, N=3)

Fisher's OR: 1.93; Bonferroni p-val: 1

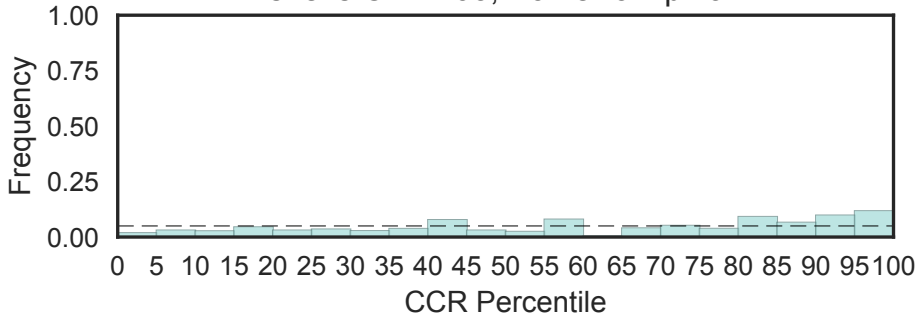

ABC transporter  
(ABC\_tran, N=78)

Fisher's OR: 0.528; Bonferroni p-val: 1

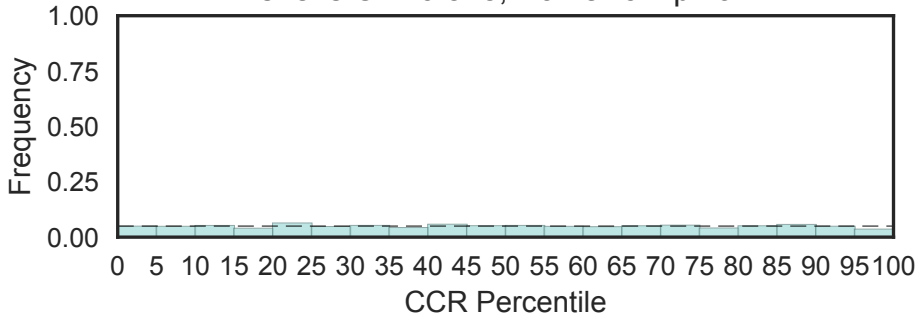

ABC transporter  
(ABC\_tran\_Xtn, N=3)  
Fisher's OR: 0; Bonferroni p-val: 1

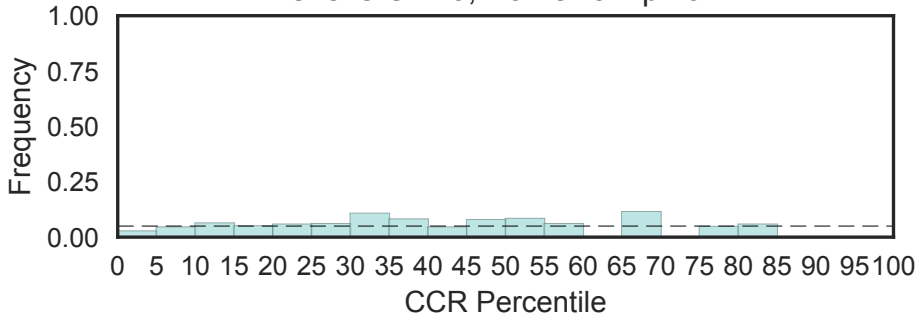

Putative ABC-transporter type IV  
(ABC\_trans\_CmpB, N=1)

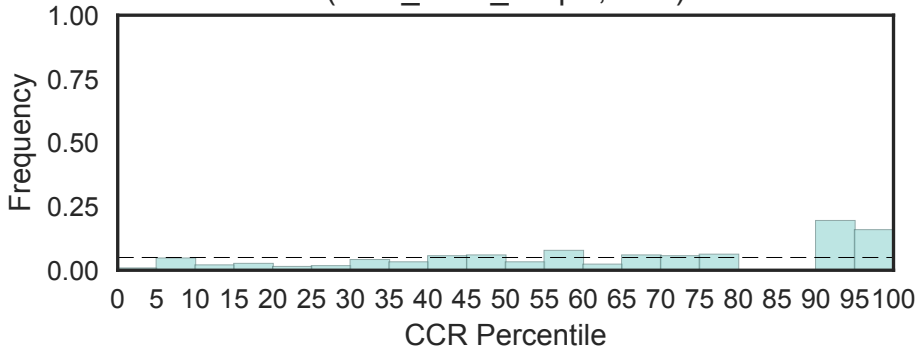

ABC-type uncharacterized transport system  
(ABC\_transp\_aux, N=1)

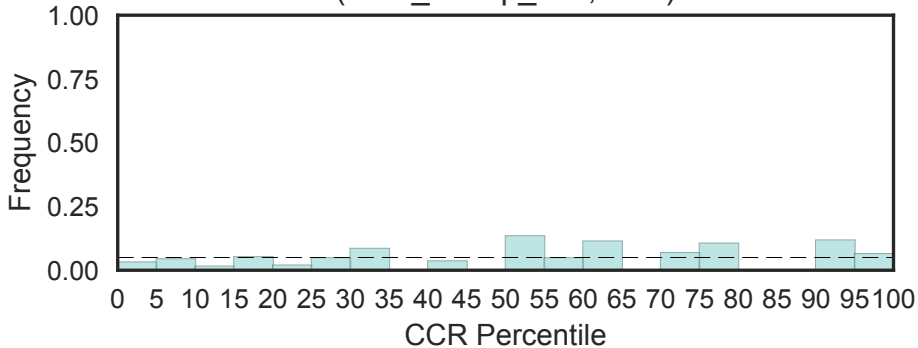

Antibiotic biosynthesis monooxygenase  
(ABM, N=3)

Fisher's OR: 1.26; Bonferroni p-val: 1

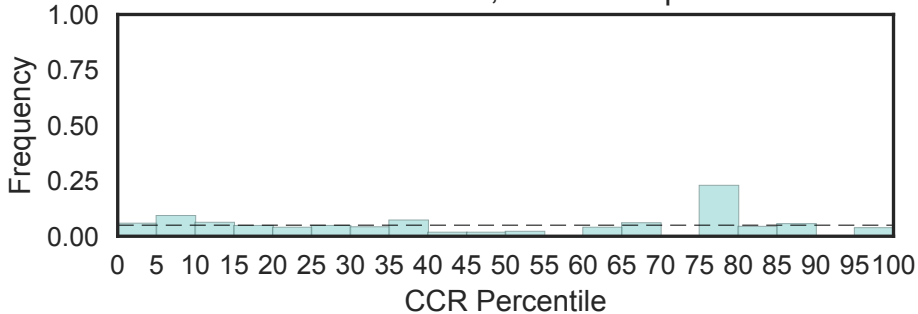



Acetyl-coenzyme A synthetase N-terminus  
(ACAS\_N, N=4)

Fisher's OR: 0; Bonferroni p-val: 1

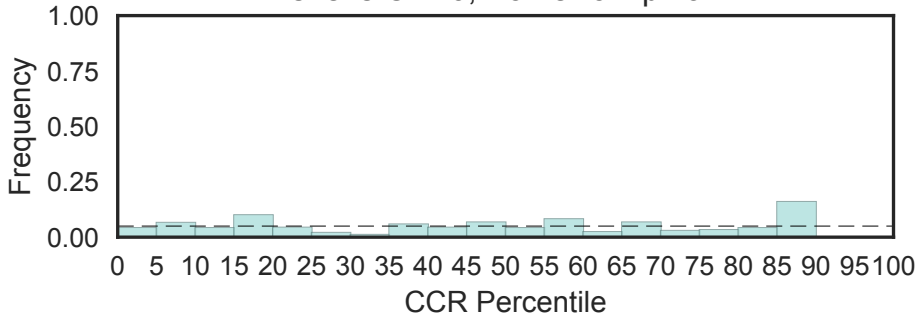

Acyl CoA binding protein  
(ACBP, N=7)

Fisher's OR: 0.454; Bonferroni p-val: 1

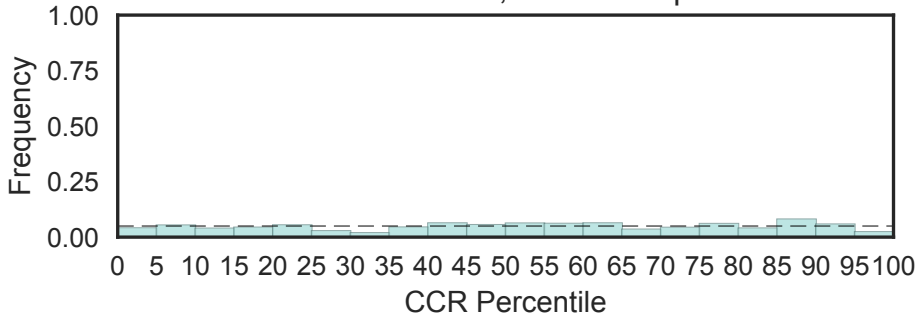

Acetyl-CoA carboxylase, central region  
(ACC\_central, N=2)

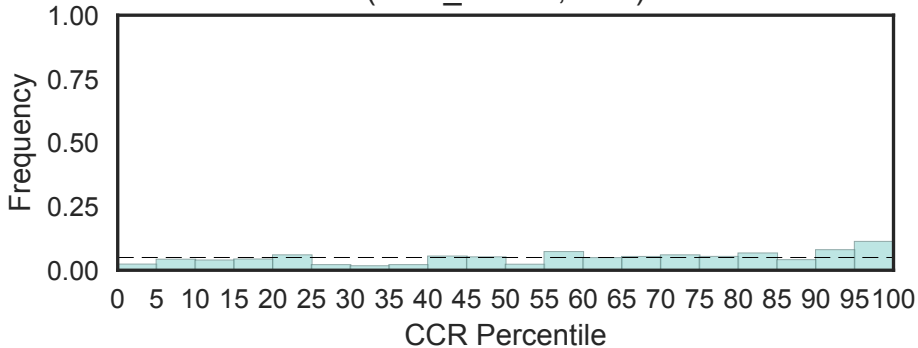

Acyl-CoA oxidase  
(ACOX, N=4)

Fisher's OR: 0; Bonferroni p-val: 1

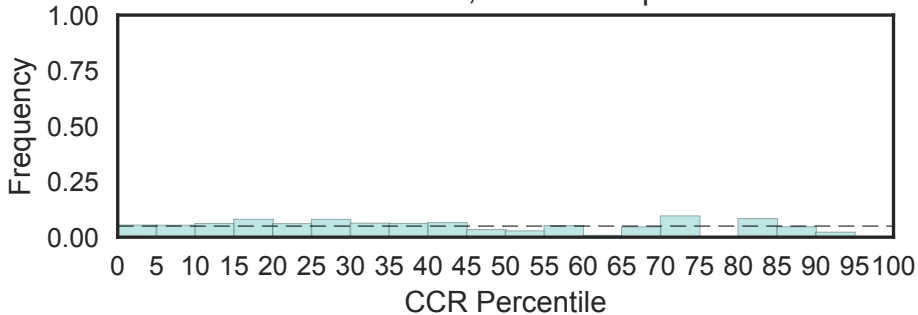

4'-phosphopantetheinyl transferase superfamily  
(ACPS, N=1)

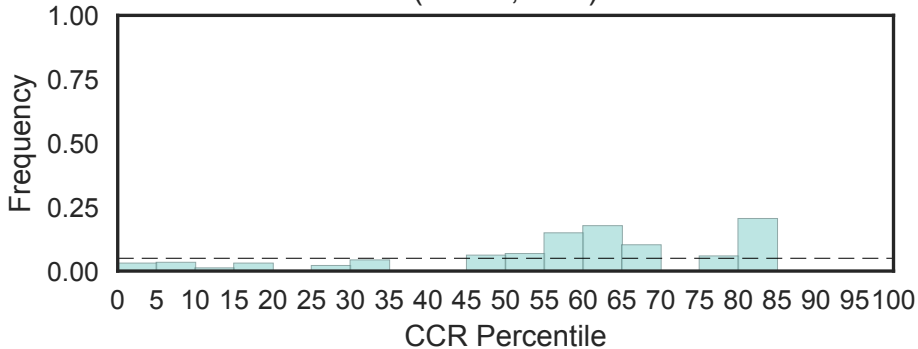

ACT domain  
(ACT, N=1)

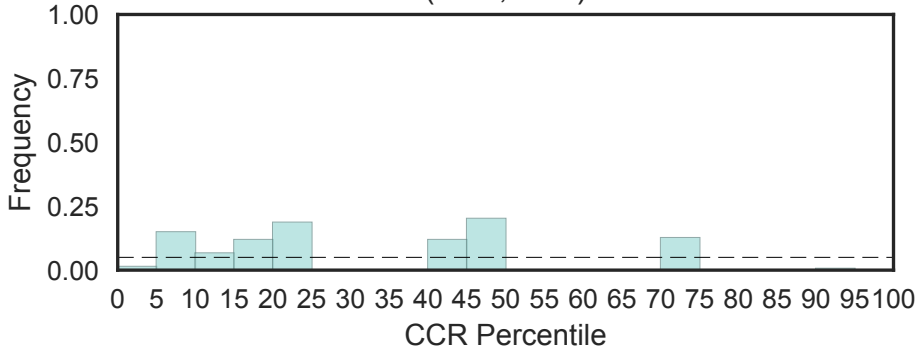

Corticotropin ACTH domain  
(ACTH\_domain, N=3)

Fisher's OR: 0; Bonferroni p-val: 1

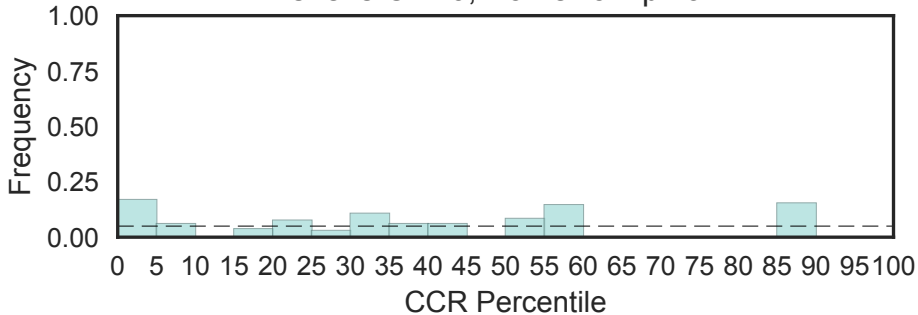

Actin-like protein 7A N-terminus  
(ACTL7A\_N, N=1)

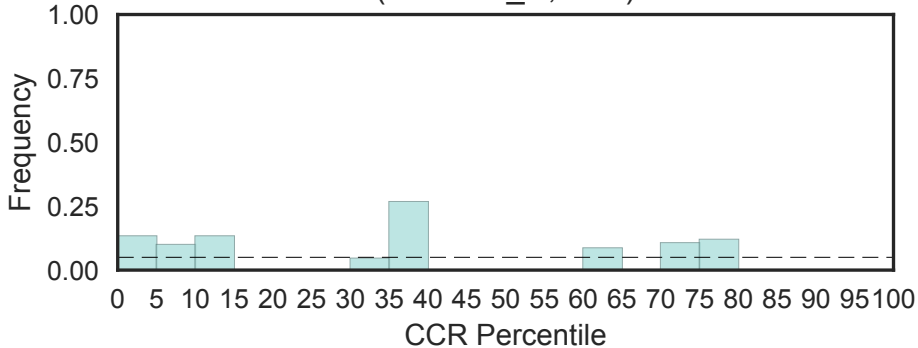



ACT domain  
(ACT\_7, N=9)

Fisher's OR: 7.46; Bonferroni p-val: 1

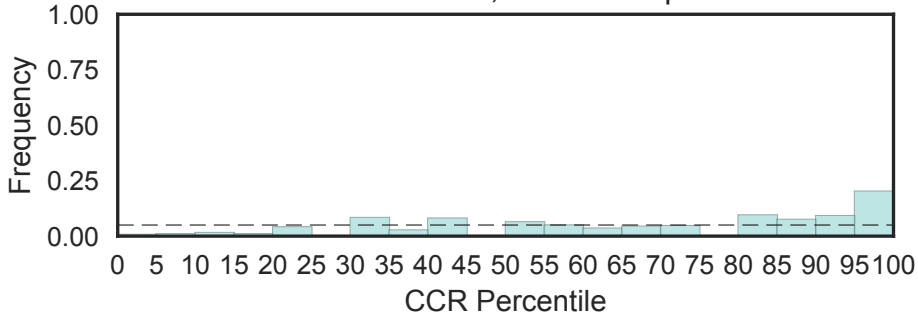

# Adenylyl cyclase N-terminal extracellular and transmembrane region (AC\_N, N=9)

Fisher's OR: 0.407; Bonferroni p-val: 1

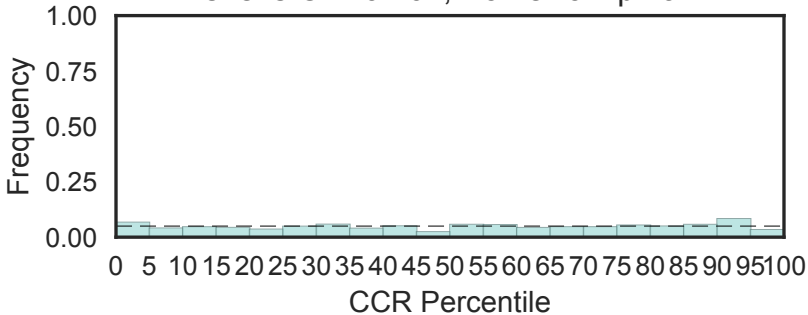

Acetylcholinesterase tetramerisation domain  
(AChE\_tetra, N=2)

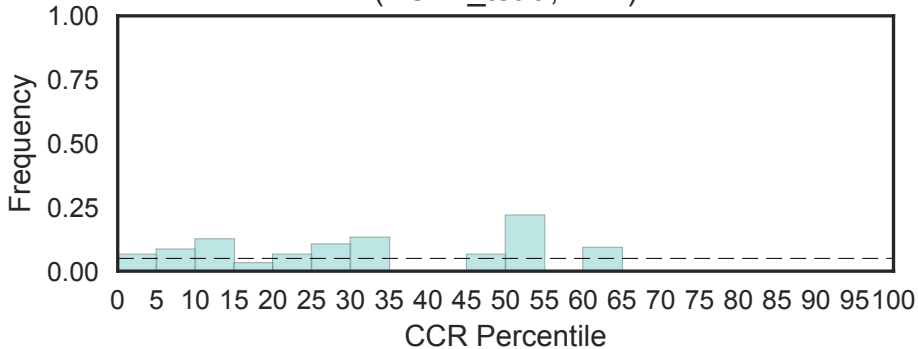

Anticodon-binding domain  
(AD, N=1)

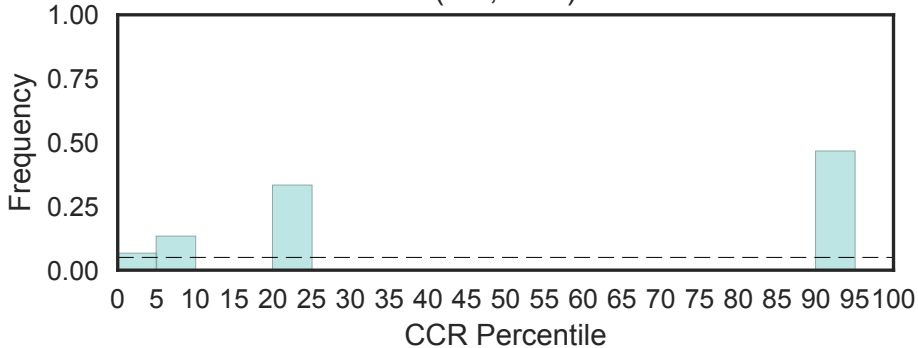

Membrane-proximal domain, switch, for ADAM17  
(ADAM17\_MPD, N=1)

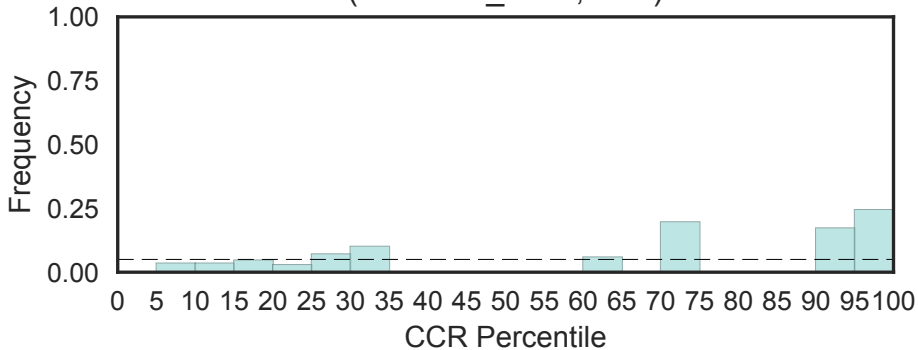

ADAM cysteine-rich  
(ADAM\_CR, N=18)

Fisher's OR: 0.31; Bonferroni p-val: 1

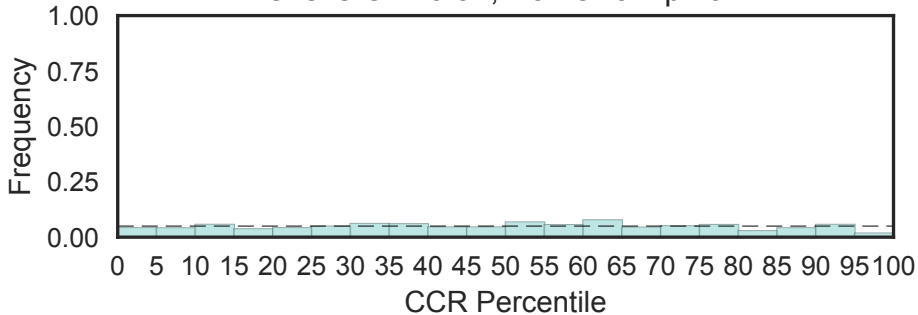

ADAM-TS Spacer 1  
(ADAM\_spacer1, N=24)  
Fisher's OR: 0.28; Bonferroni p-val: 1

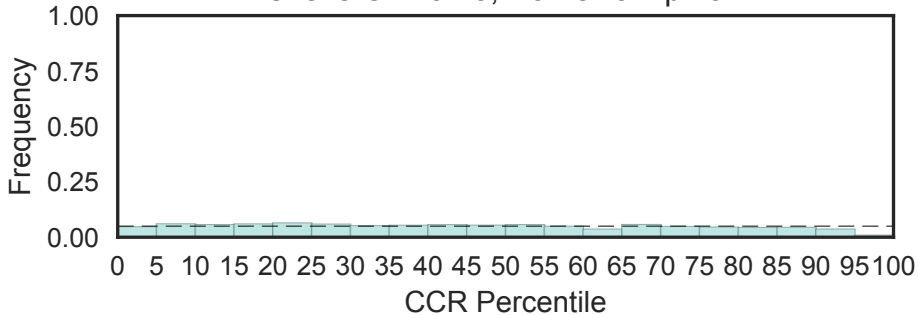

Alcohol dehydrogenase GroES-like domain  
(ADH\_N, N=14)

Fisher's OR: 0.217; Bonferroni p-val: 1

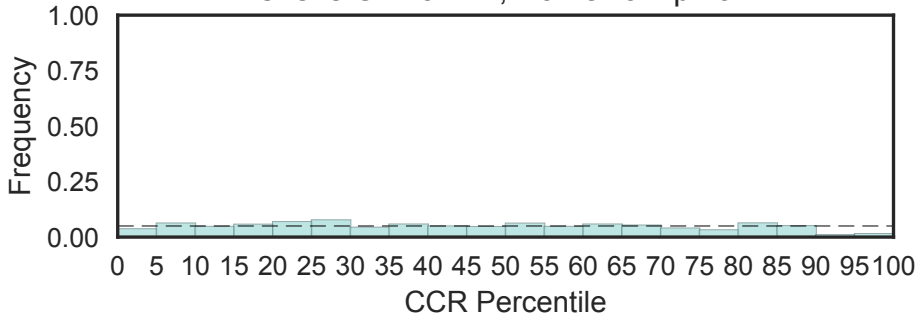



N-terminal domain of oxidoreductase  
(ADH\_N\_2, N=2)

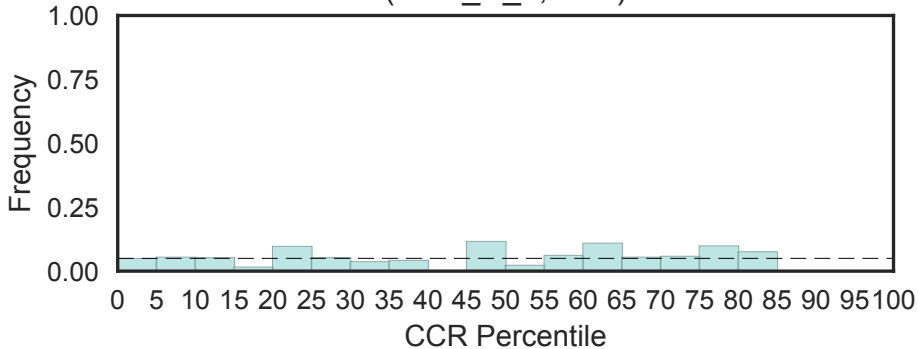

Zinc-binding dehydrogenase  
(ADH\_zinc\_N, N=18)

Fisher's OR: 0.125; Bonferroni p-val: 1

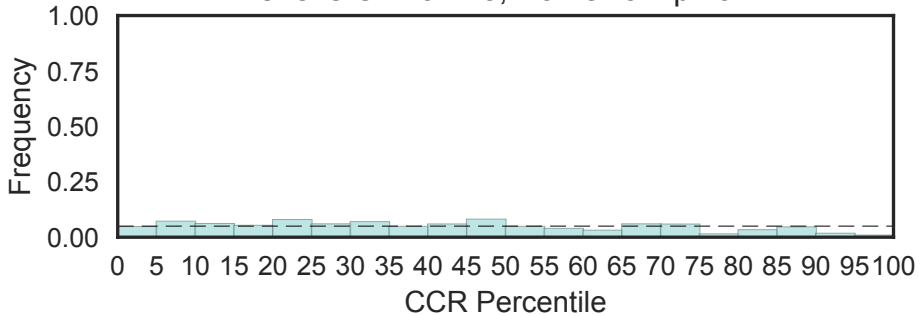

Zinc-binding dehydrogenase  
(ADH\_zinc\_N\_2, N=11)

Fisher's OR: 0.173; Bonferroni p-val: 1

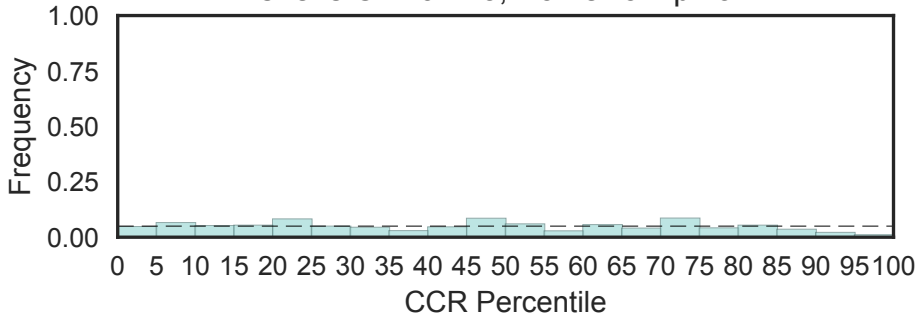

# Afadin- and alpha -actinin-Binding (ADIP, N=1)

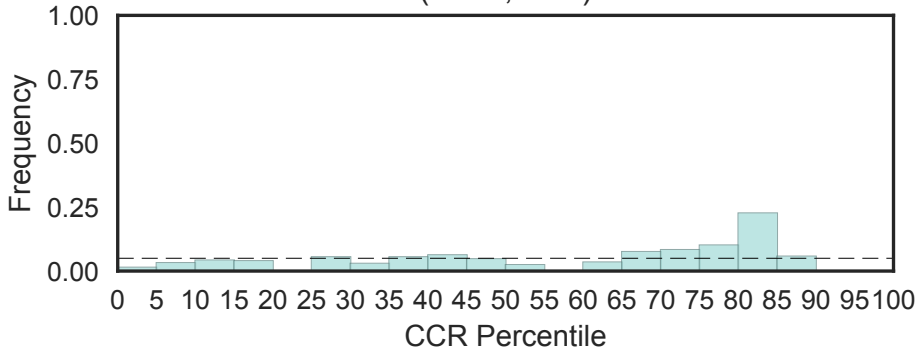

Adenylate kinase  
(ADK, N=14)

Fisher's OR: 0.951; Bonferroni p-val: 1

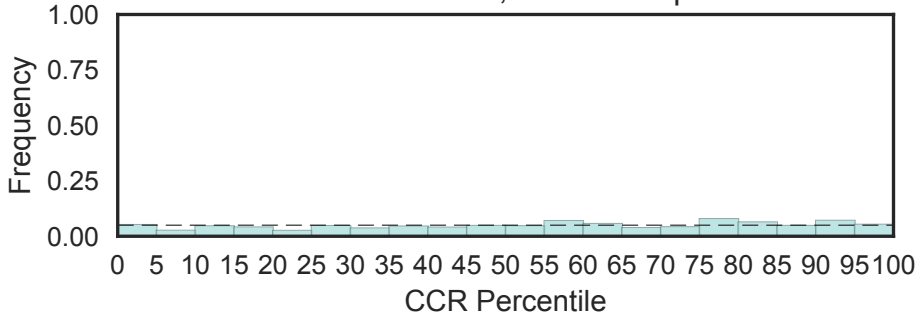

Adenylate kinase, active site lid  
(ADK\_lid, N=3)

Fisher's OR: 0; Bonferroni p-val: 1

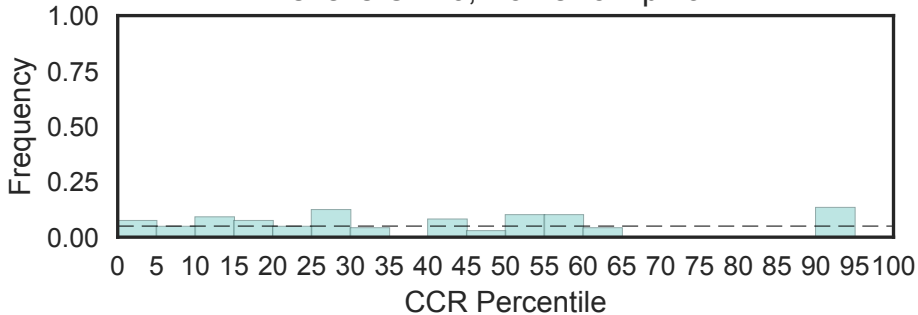

# ADP-specific Phosphofructokinase/Glucokinase conserved region (ADP\_PFK\_GK, N=1)

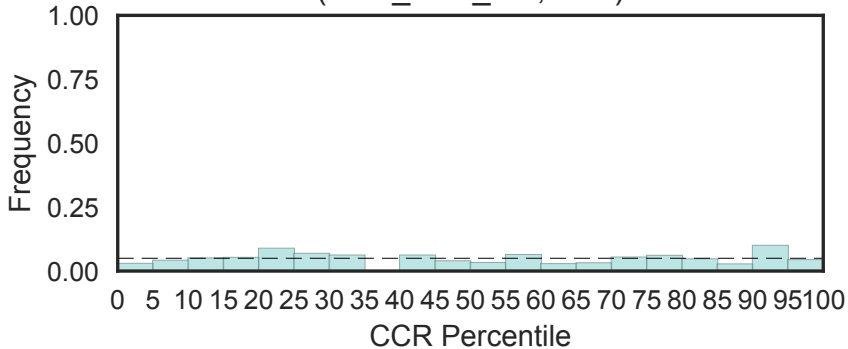

ADP-ribosylglycohydrolase  
(ADP\_ribosyl\_GH, N=3)

Fisher's OR: 0; Bonferroni p-val: 1

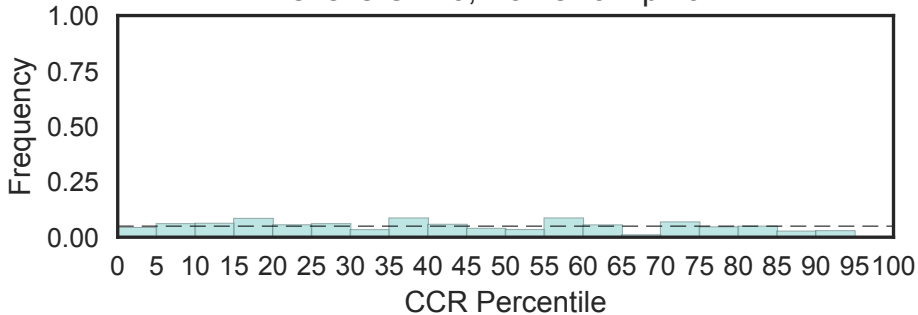



Adenylosuccinate lyase C-terminus  
(ADSL\_C, N=1)

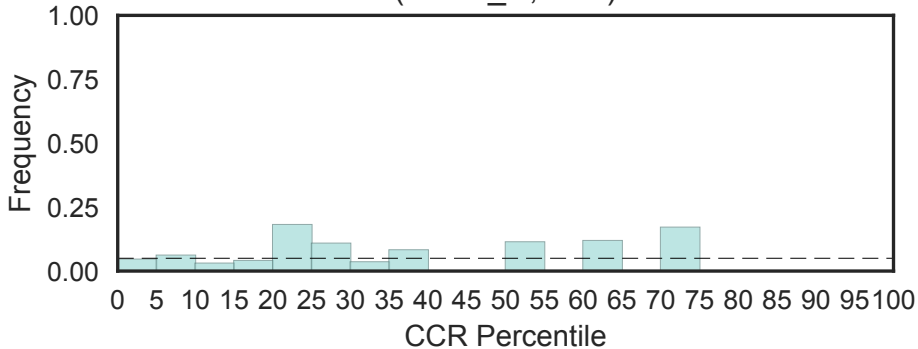

AF-4 proto-oncoprotein  
(AF-4, N=4)

Fisher's OR: 0.907; Bonferroni p-val: 1

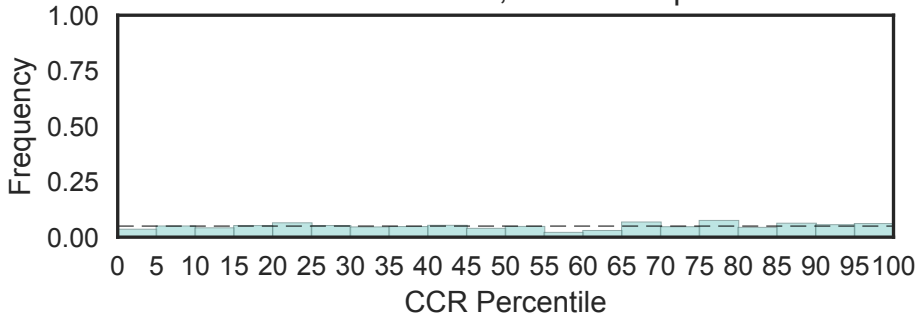

AFG1-like ATPase  
(AFG1\_ATPase, N=1)

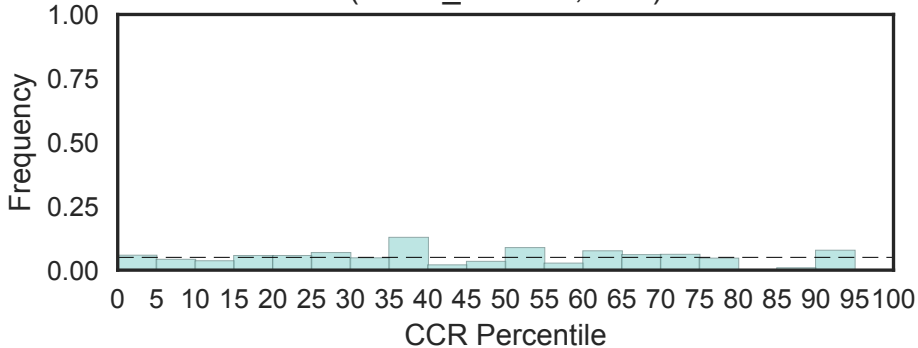

Angiotensin II, type I receptor-associated protein (AGTRAP)  
(AGTRAP, N=1)

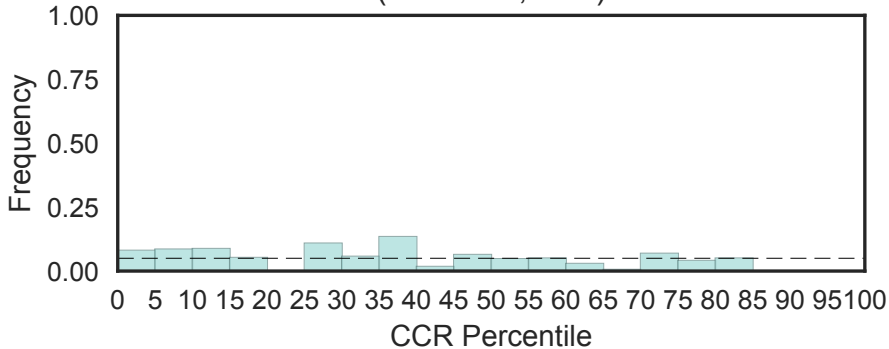

Activator of Hsp90 ATPase homolog 1-like protein  
(AHSA1, N=1)

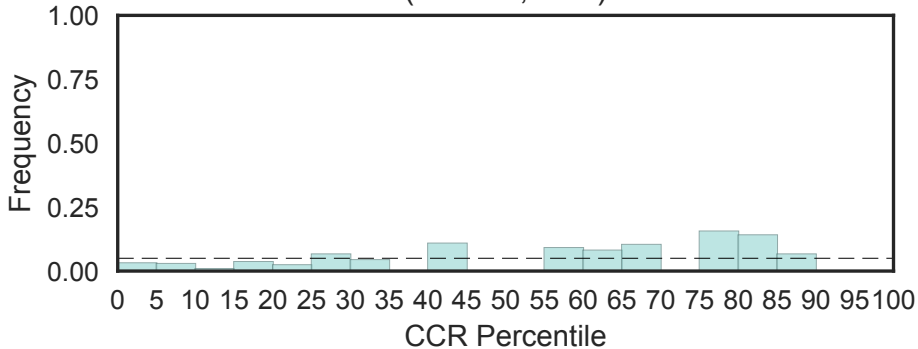

# Alpha-haemoglobin stabilising protein (AHSP, N=1)

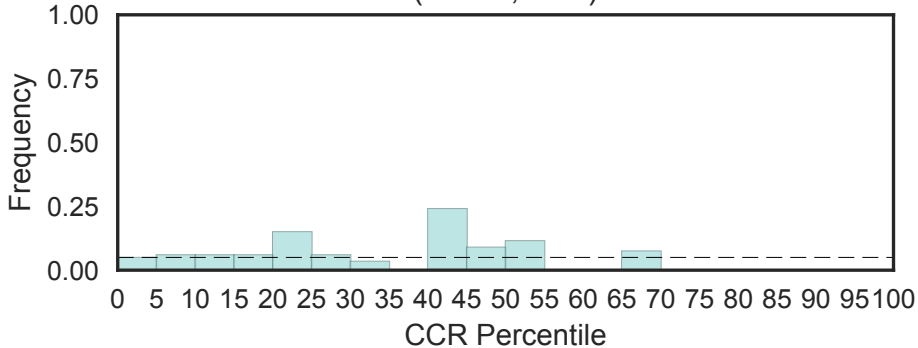

AI-2E family transporter  
(AI-2E\_transport, N=1)

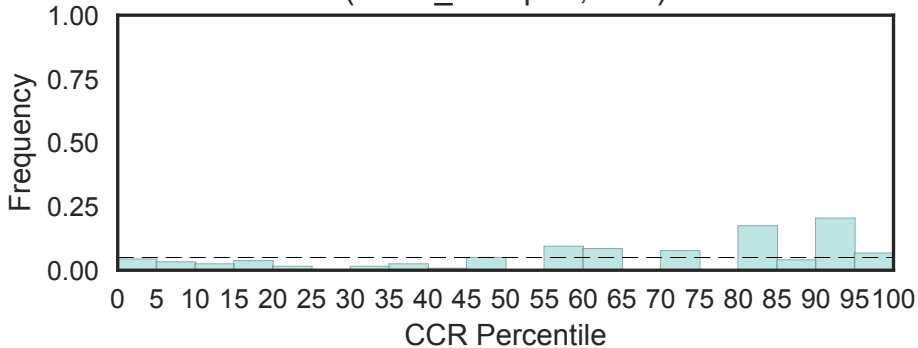

# Aurora kinase A and ninein interacting protein (AIB, N=1)

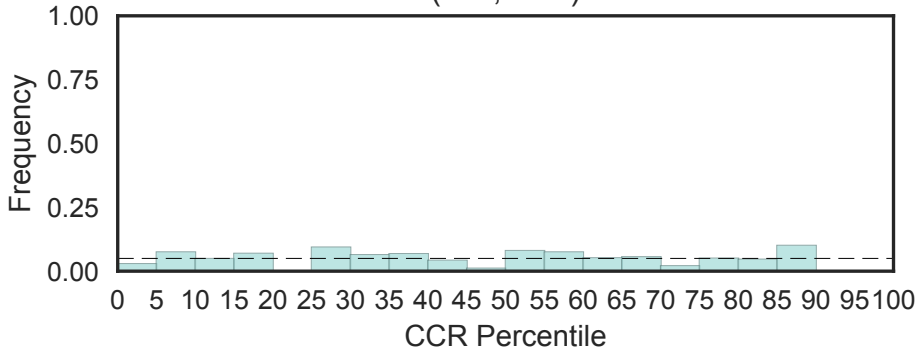



AICARFT/IMPCHase bienzyme  
(AICARFT\_IMPCHas, N=1)

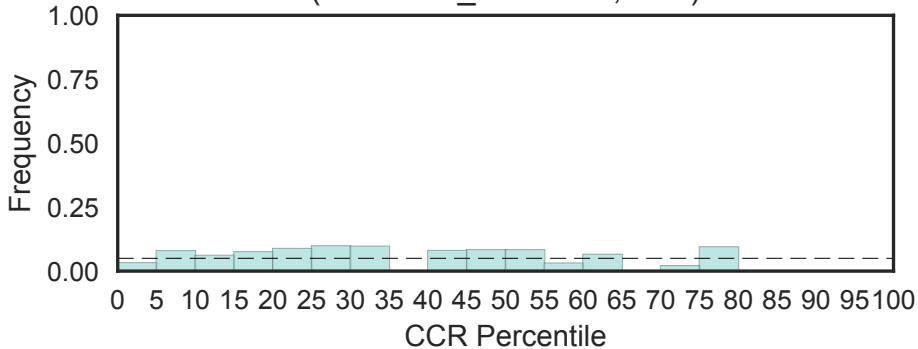

# Mitochondria Localisation Sequence (AIF-MLS, N=1)

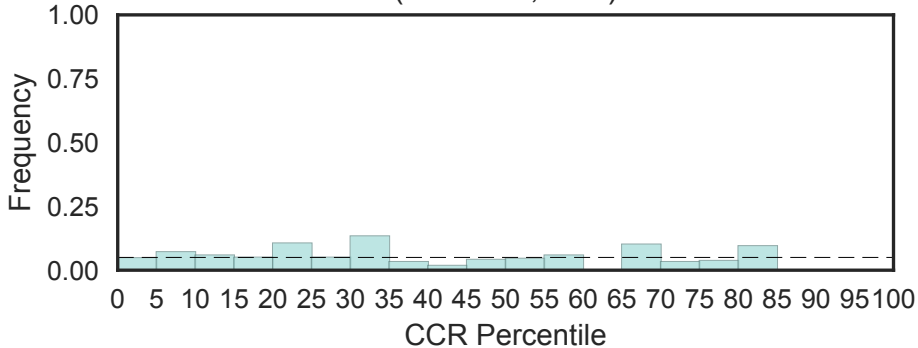

AIG1 family  
(AIG1, N=10)

Fisher's OR: 0; Bonferroni p-val: 1

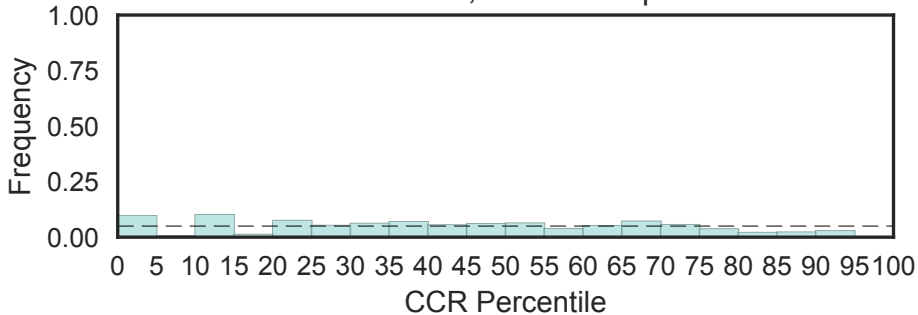

AIG2-like family  
(AIG2\_2, N=1)

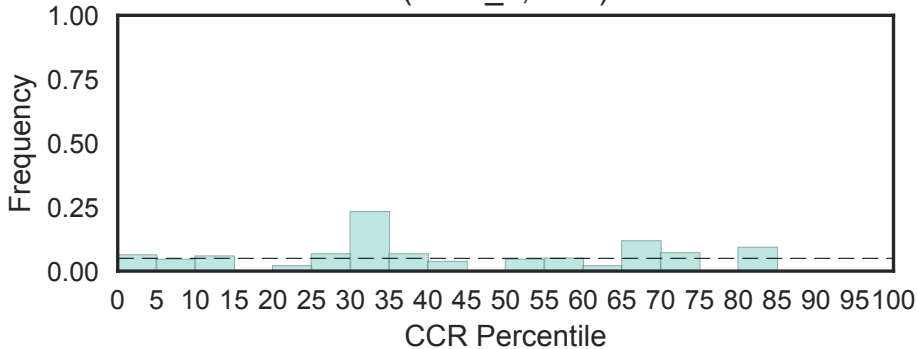

Actin interacting protein 3  
(AIP3, N=3)

Fisher's OR: 0; Bonferroni p-val: 1

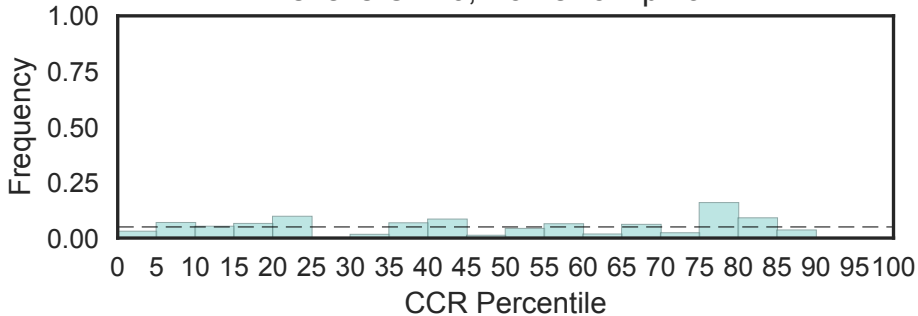

AIR carboxylase  
(AIRC, N=1)

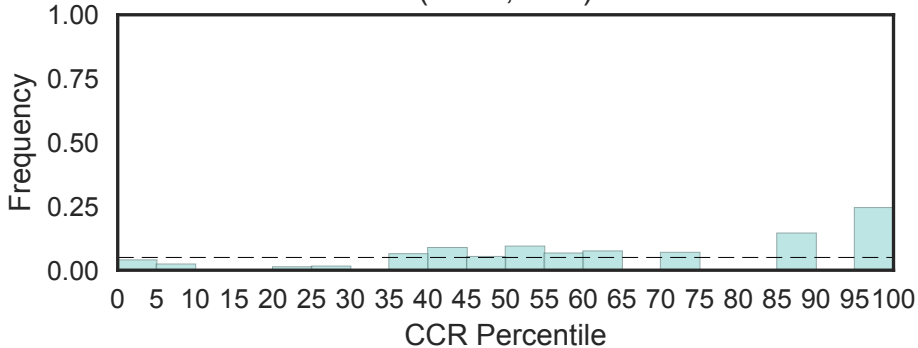

AIR synthase related protein, N-terminal domain  
(AIRS, N=3)

Fisher's OR: 0; Bonferroni p-val: 1

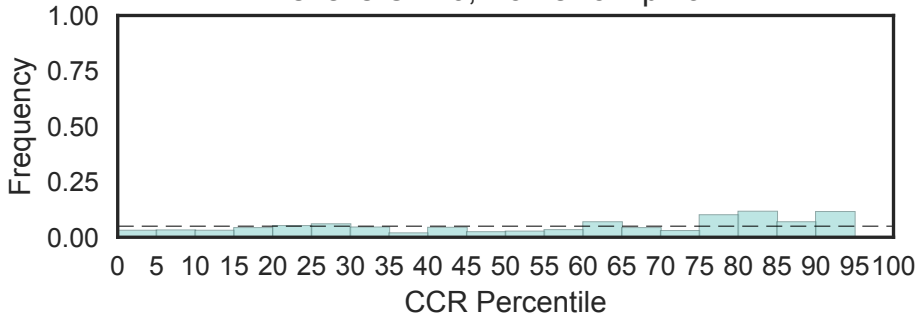

AIR synthase related protein, C-terminal domain  
(AIRS\_C, N=5)

Fisher's OR: 0.409; Bonferroni p-val: 1

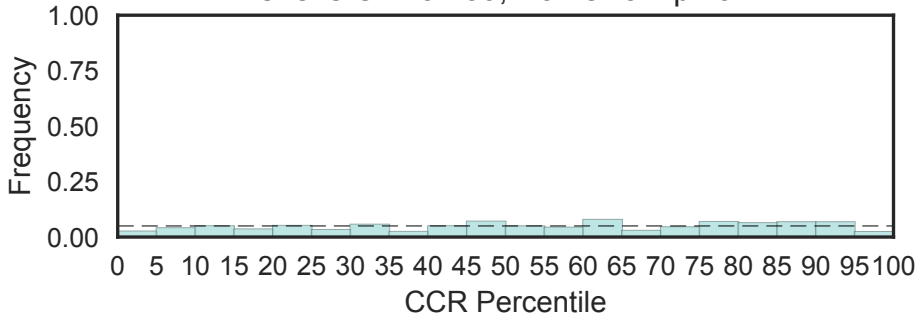



AJAP1/PANP C-terminus  
(AJAP1\_PANP\_C, N=2)

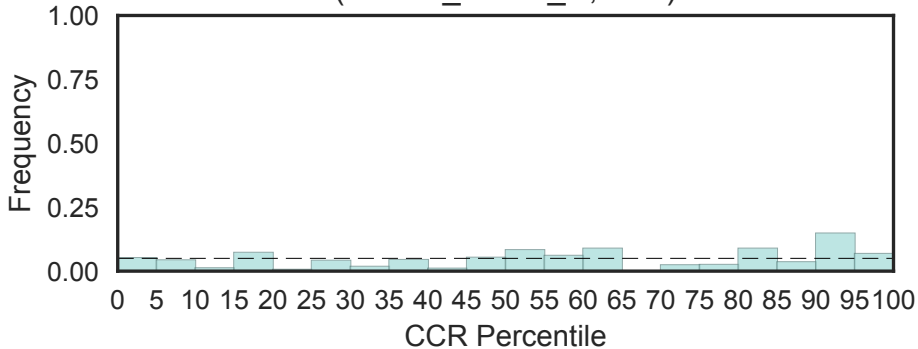

A-kinase anchor protein 2 C-terminus  
(AKAP2\_C, N=5)

Fisher's OR: 0; Bonferroni p-val: 1

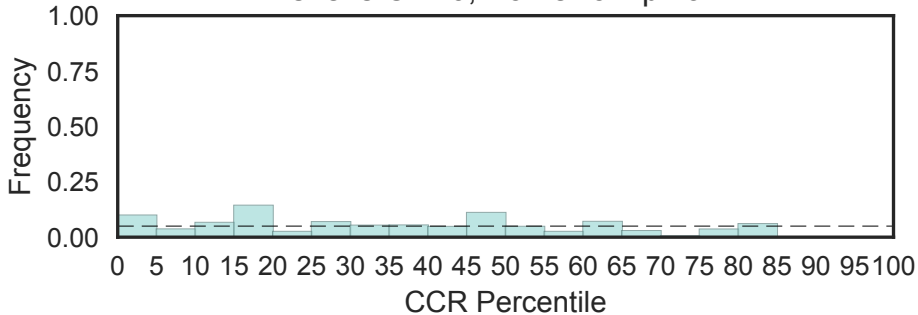

AKAP7 2'5' RNA ligase-like domain  
(AKAP7\_NLS, N=3)

Fisher's OR: 0; Bonferroni p-val: 1

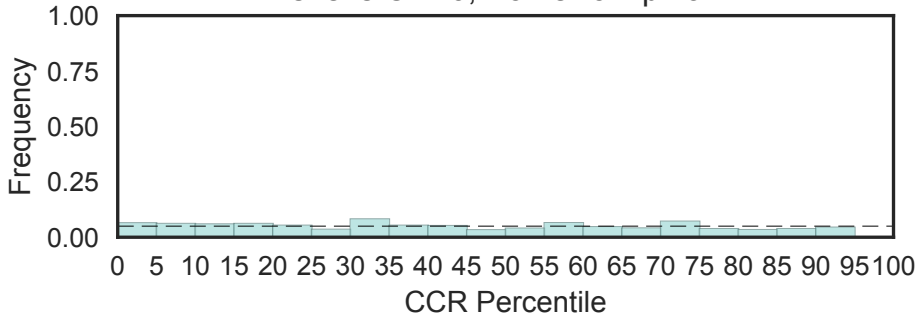

PKA-R1-R11 subunit binding domain of A-kinase anchor protein  
(AKAP7\_R1R11\_bdg, N=2)

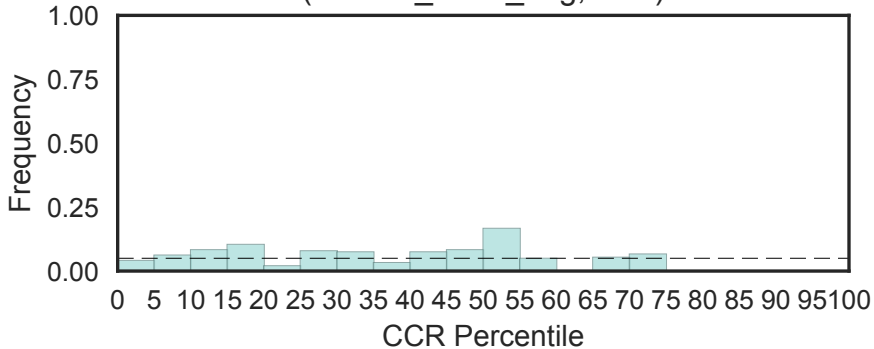

A-kinase anchoring protein 95 (AKAP95)  
(AKAP95, N=3)

Fisher's OR: 0.647; Bonferroni p-val: 1

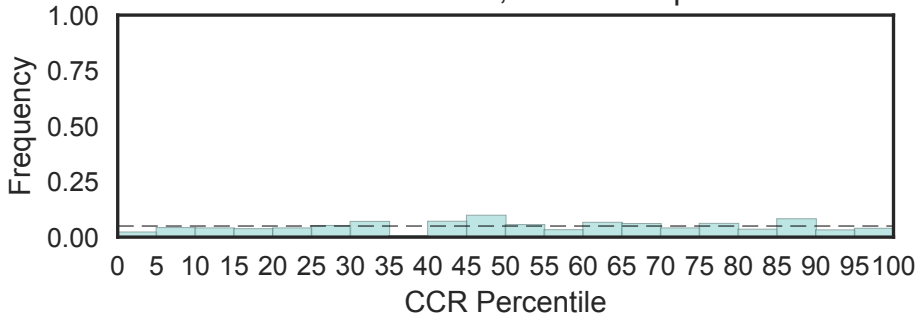

A-kinase anchor protein 110 kDa (AKAP 110)  
(AKAP\_110, N=2)

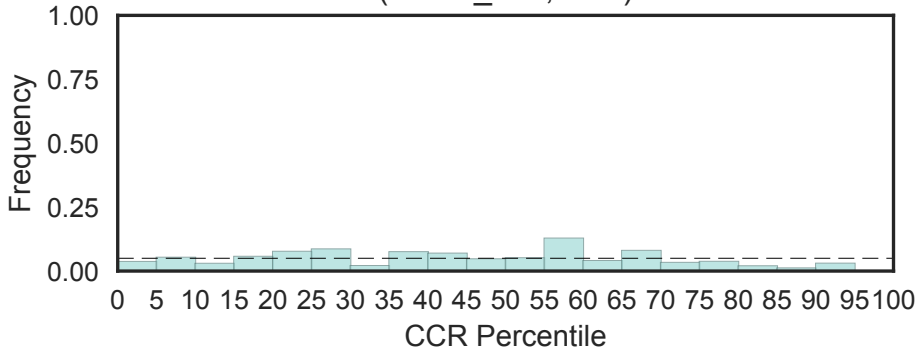

AT-hook-containing transcription factor  
(AKNA, N=2)

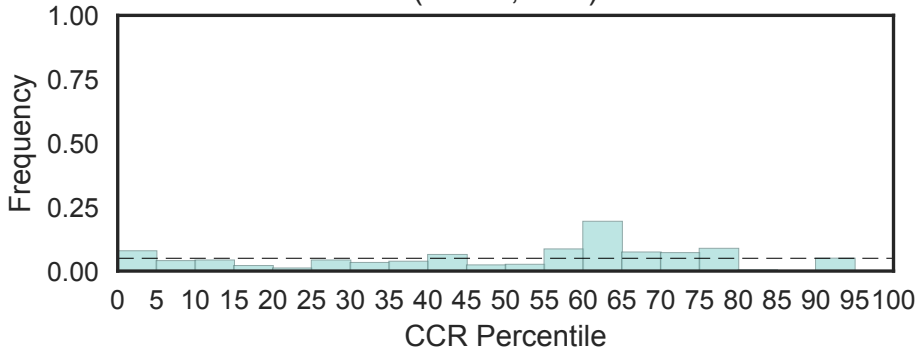

# Delta-aminolevulinic acid dehydratase (ALAD, N=1)

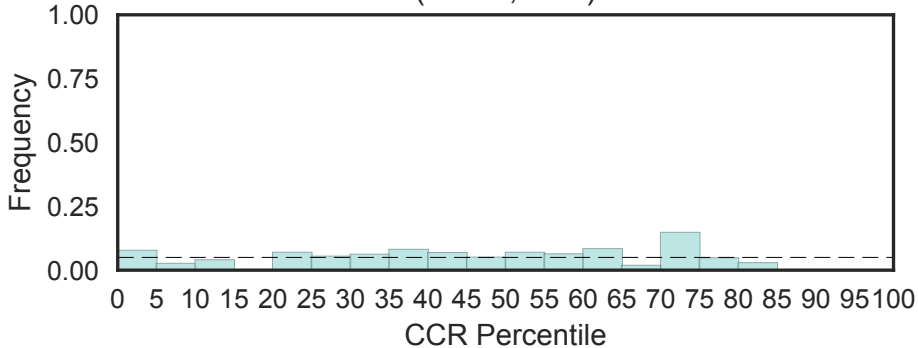



ALG11 mannosyltransferase N-terminus  
(ALG11\_N, N=1)

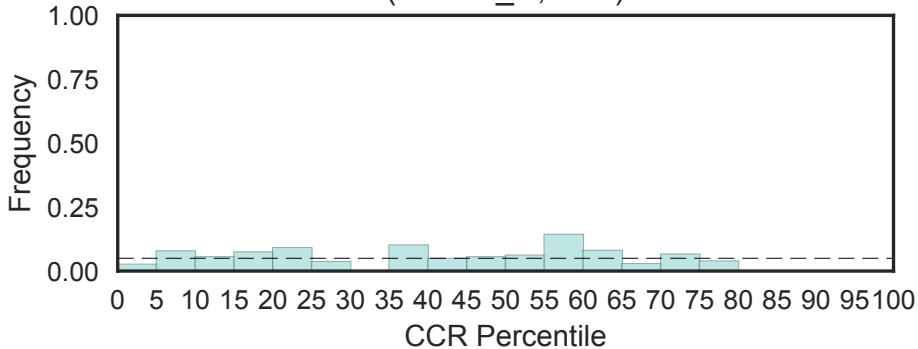

ALG3 protein  
(ALG3, N=1)

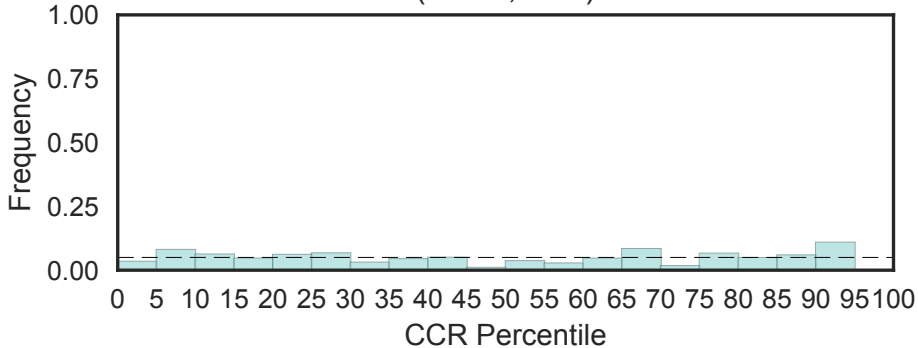

ALIX V-shaped domain binding to HIV  
(ALIX\_LYPXL\_bnd, N=2)

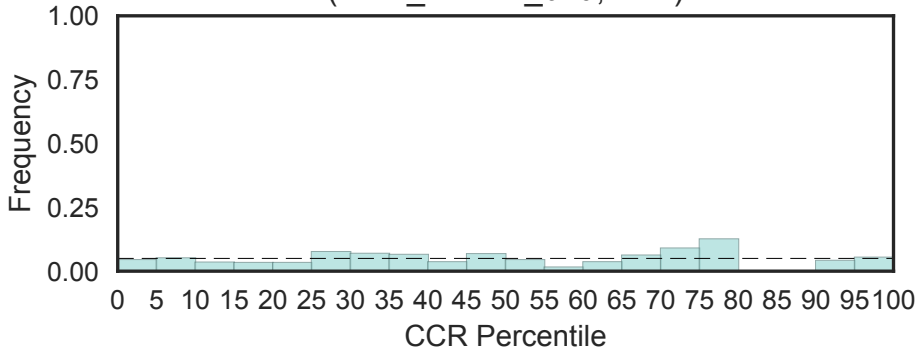

ALMS motif  
(ALMS\_motif, N=3)  
Fisher's OR: 0; Bonferroni p-val: 1

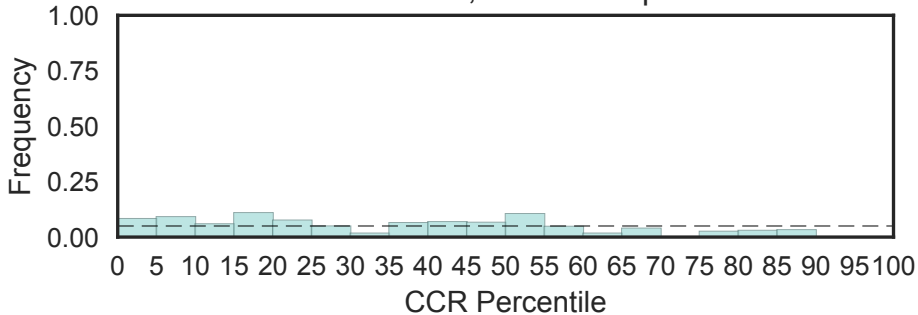

Amyotrophic lateral sclerosis 2 candidate 11  
(ALS2CR11, N=1)

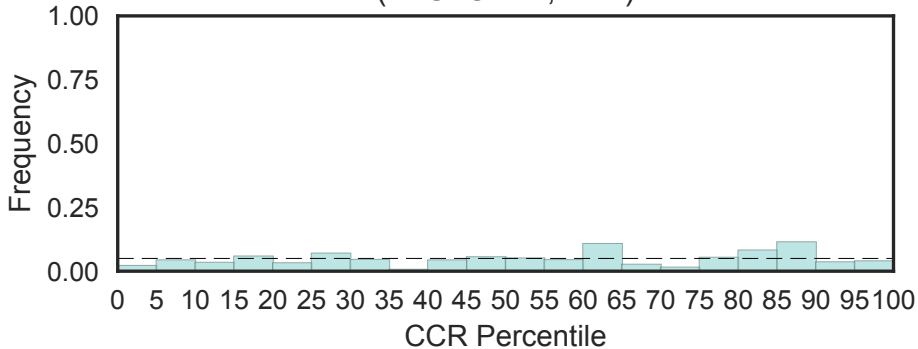

# Amyotrophic lateral sclerosis 2 chromosomal region candidate gene 8 (ALS2CR8, N=1)

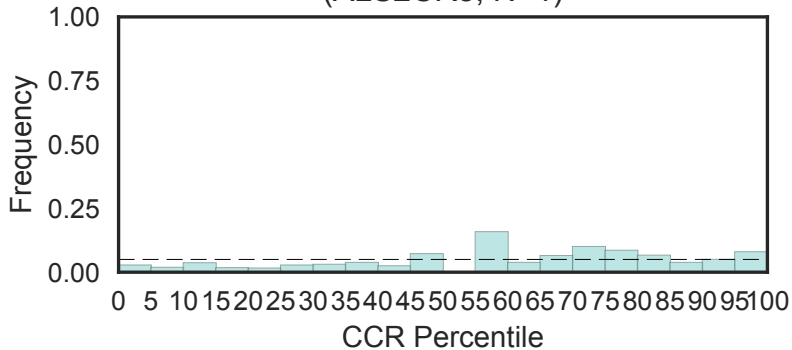

Anti-Mullerian hormone, N terminal region  
(AMH\_N, N=1)

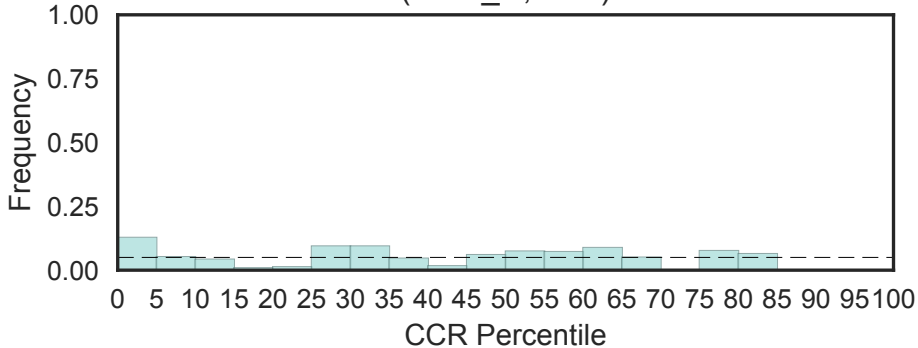

# AMMECR1 (AMMECR1, N=1)

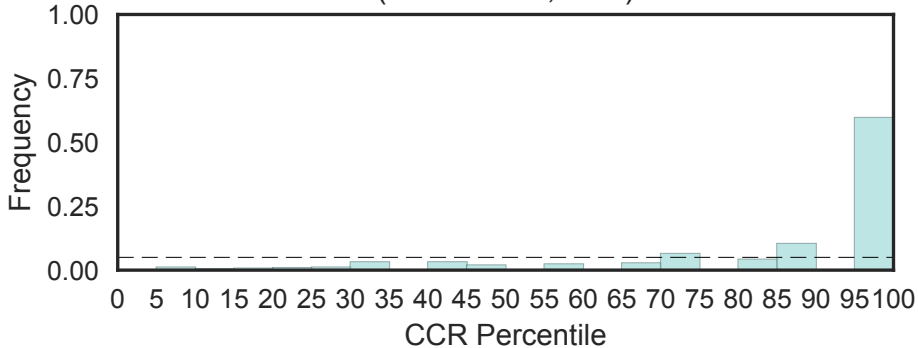



AMOP domain  
(AMOP, N=3)

Fisher's OR: 0; Bonferroni p-val: 1

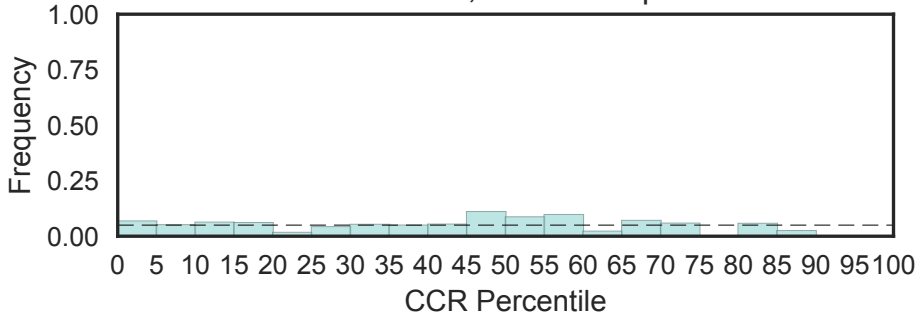

AMP-binding enzyme  
(AMP-binding, N=35)

Fisher's OR: 0.447; Bonferroni p-val: 0.274

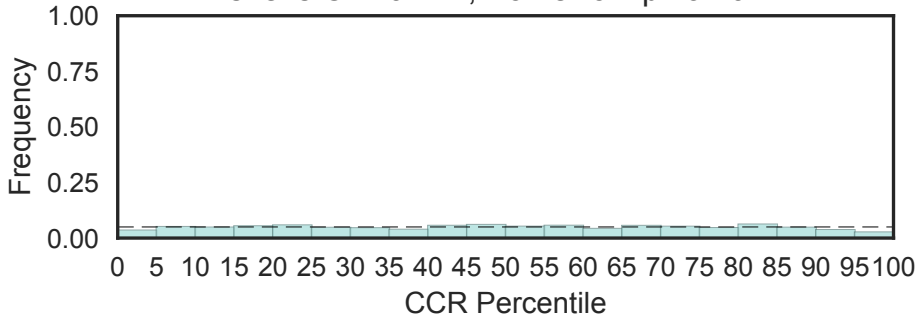

AMP-binding enzyme C-terminal domain  
(AMP-binding\_C, N=19)

Fisher's OR: 0.231; Bonferroni p-val: 1

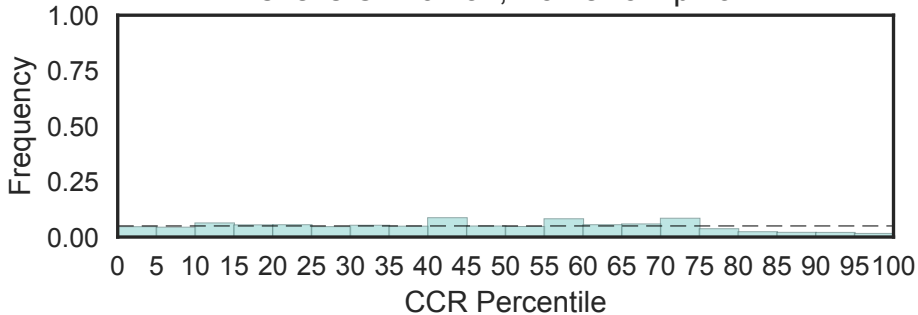

# Glycogen recognition site of AMP-activated protein kinase (AMPK1\_CBM, N=2)

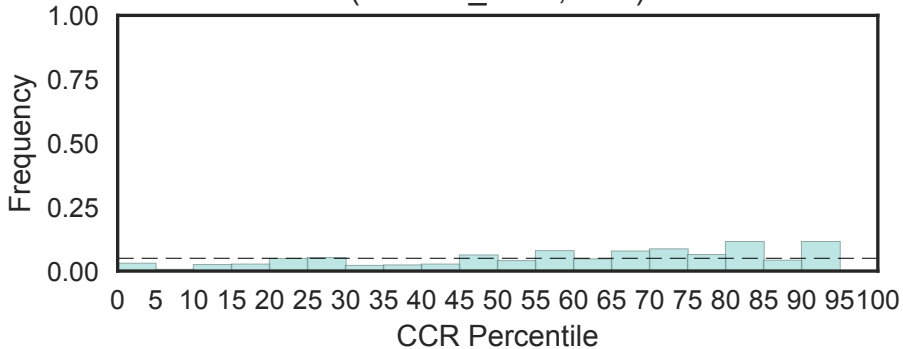

# 5'-AMP-activated protein kinase beta subunit, interaction domain (AMPKBI, N=2)

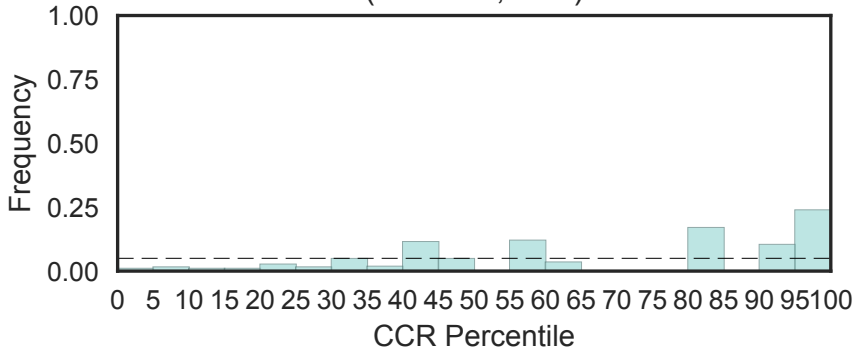

Aminopeptidase P, N-terminal domain  
(AMP\_N, N=2)

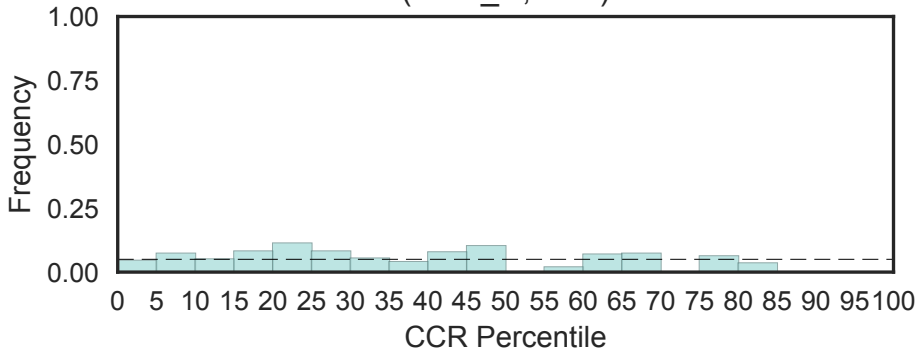

Anaphase-promoting complex, subunit 10 (APC10)  
(ANAPC10, N=7)

Fisher's OR: 1.89; Bonferroni p-val: 1

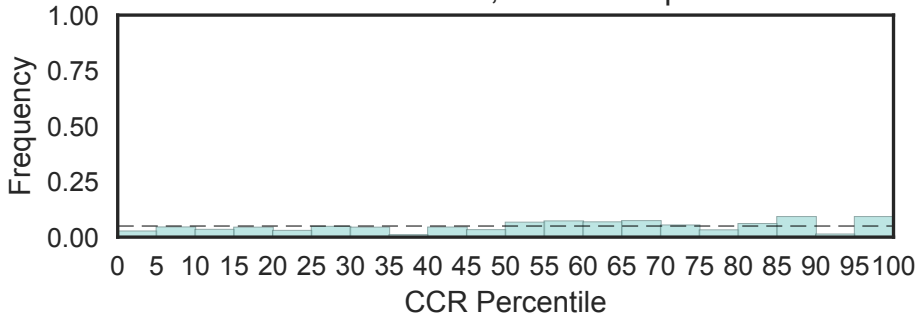

Anaphase-promoting complex subunit 15  
(ANAPC15, N=1)

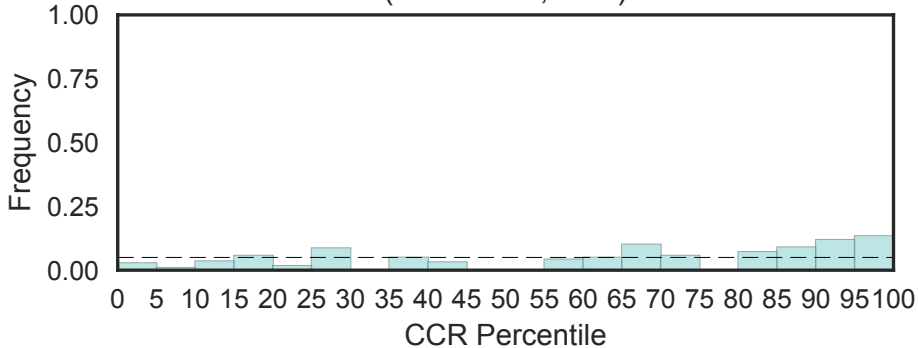



# Anaphase Promoting Complex Subunit 16 (ANAPC16, N=1)

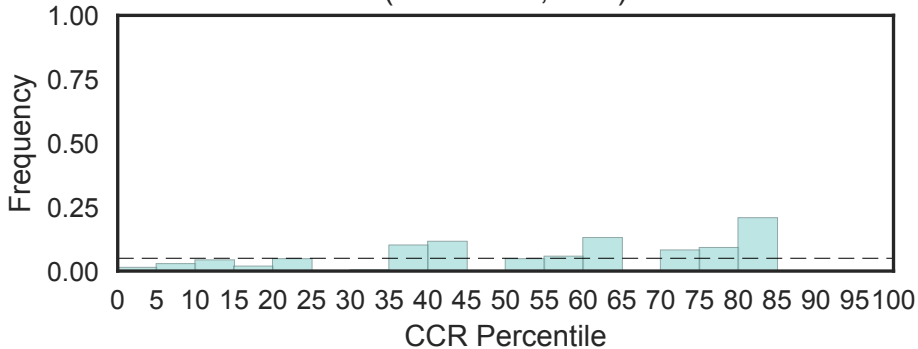

Anaphase promoting complex (APC) subunit 2  
(ANAPC2, N=1)

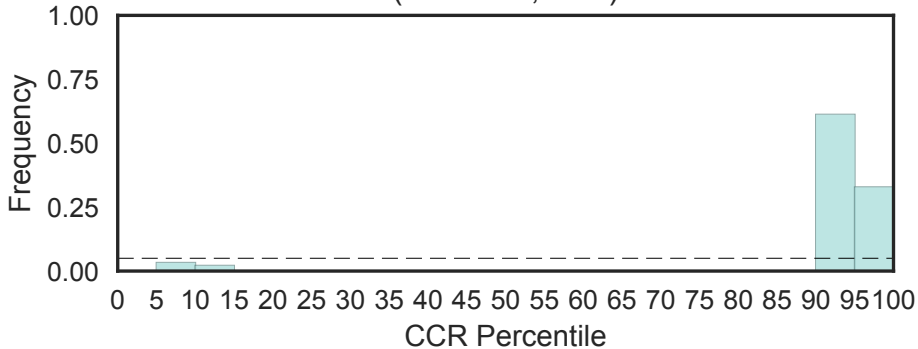

Anaphase-promoting complex, cyclosome, subunit 3  
(ANAPC3, N=6)

Fisher's OR: 1.68; Bonferroni p-val: 1

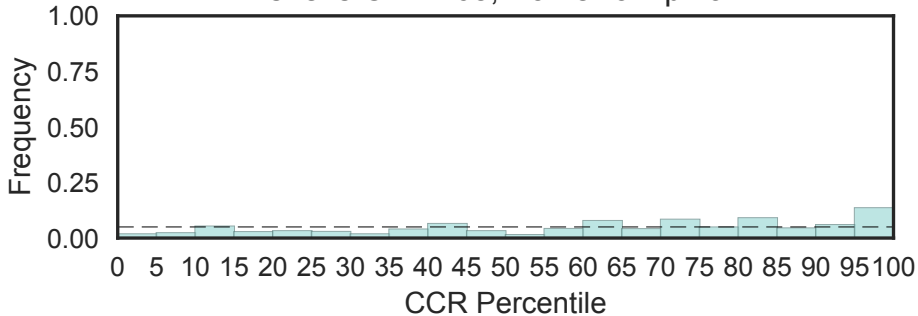

# Anaphase-promoting complex, cyclosome, subunit 4 (ANAPC4, N=1)

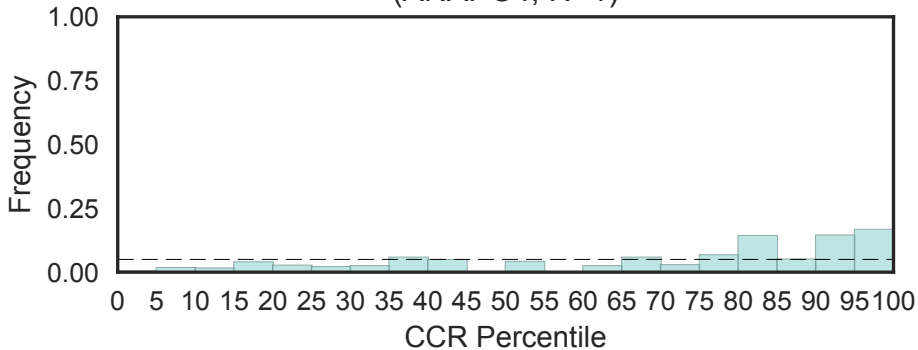

Anaphase-promoting complex subunit 4 WD40 domain  
(ANAPC4\_WD40, N=35)

Fisher's OR: 1.76; Bonferroni p-val: 1

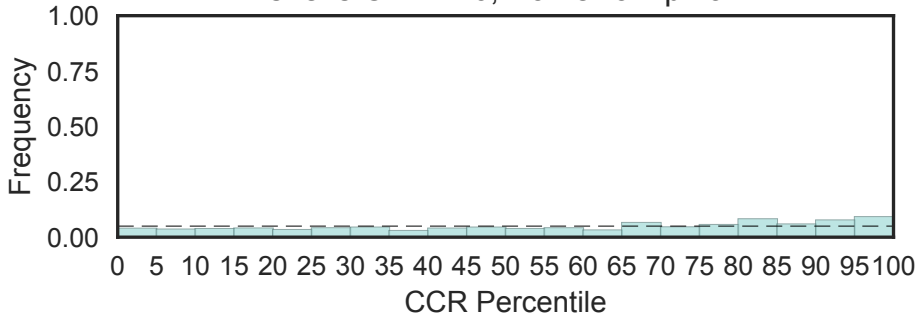

Anaphase-promoting complex subunit 5  
(ANAPC5, N=20)

Fisher's OR: 0.358; Bonferroni p-val: 1

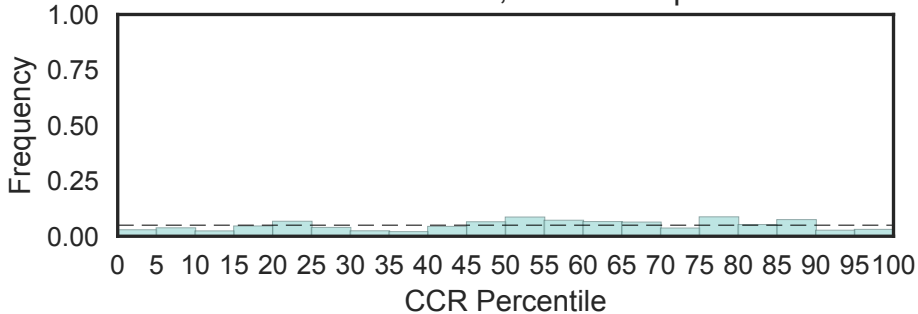

Anaphase promoting complex subunit 8 / Cdc23  
(ANAPC8, N=1)

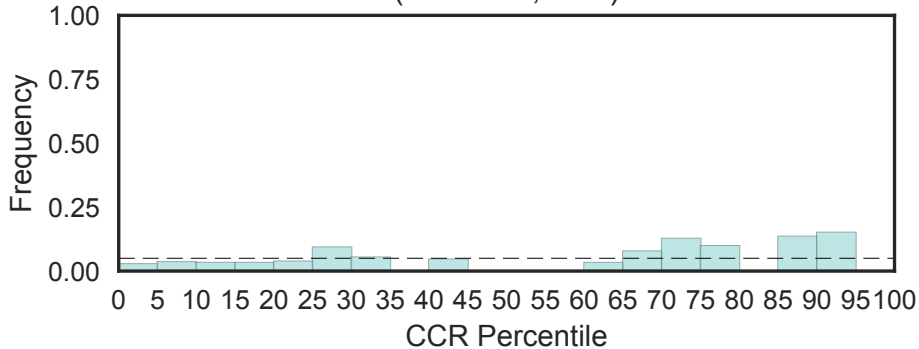

Anaphase-promoting complex APC subunit CDC26  
(ANAPC\_CDC26, N=1)

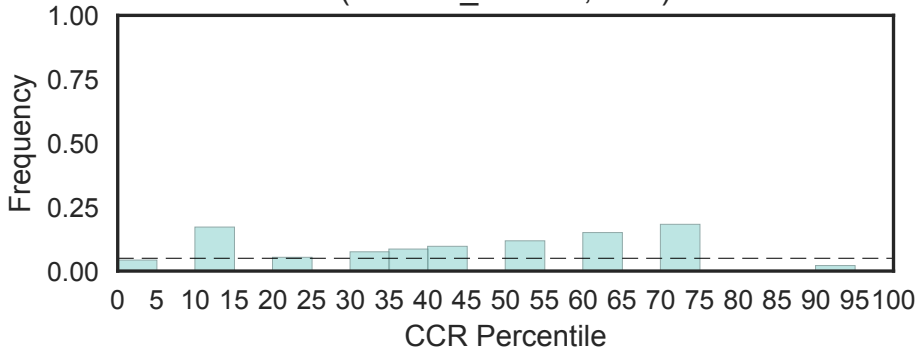



Anaphylotoxin-like domain  
(ANATO, N=5)

Fisher's OR: 0; Bonferroni p-val: 1

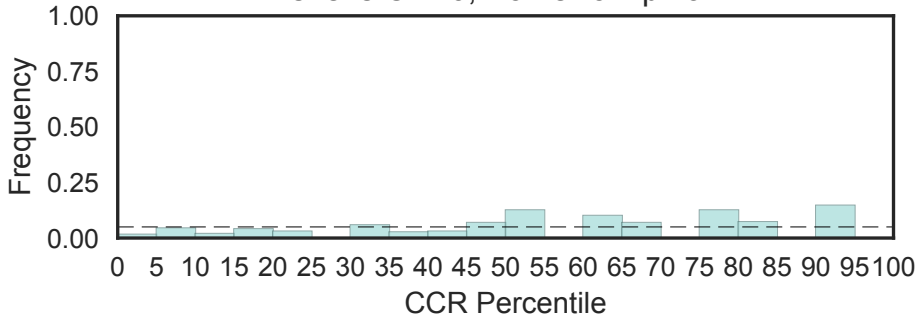

Receptor family ligand binding region  
(ANF\_receptor, N=37)

Fisher's OR: 1.01; Bonferroni p-val: 1

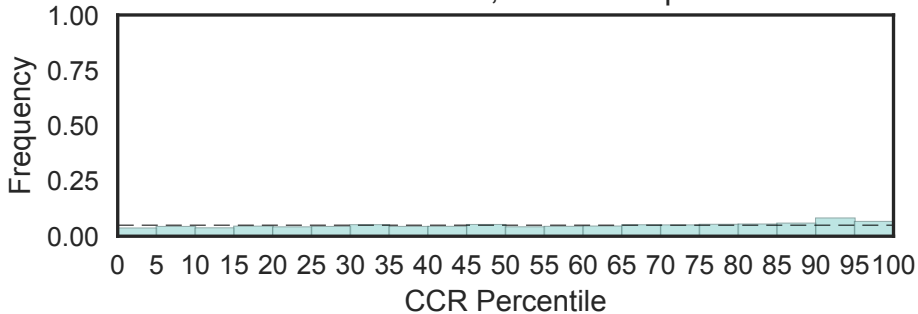

Progressive ankylosis protein (ANKH)  
(ANKH, N=1)

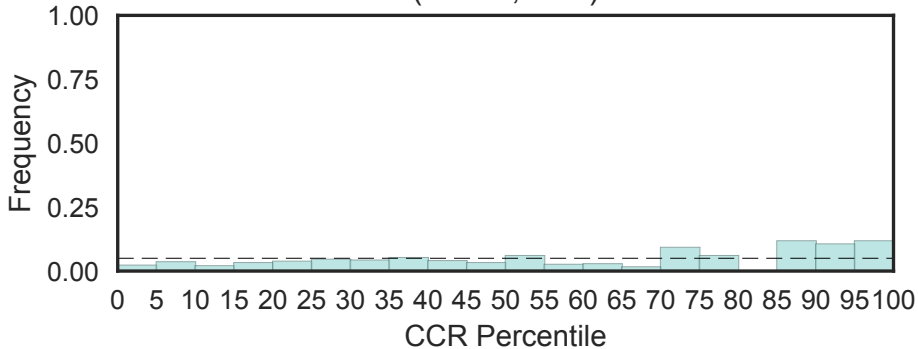

Atrial natriuretic peptide  
(ANP, N=3)

Fisher's OR: 0; Bonferroni p-val: 1

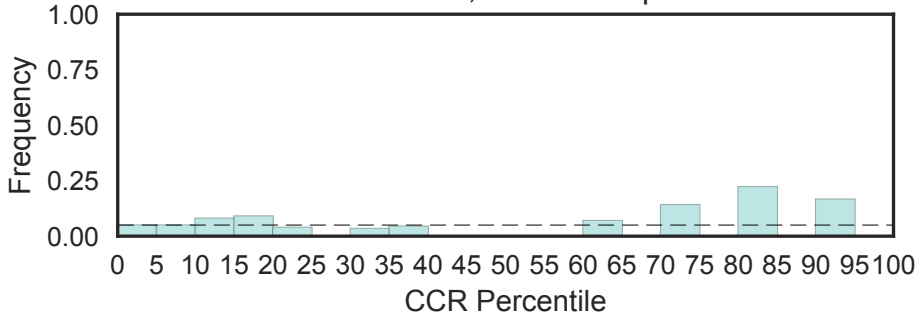

ANTH domain  
(ANTH, N=8)

Fisher's OR: 3.42; Bonferroni p-val: 1

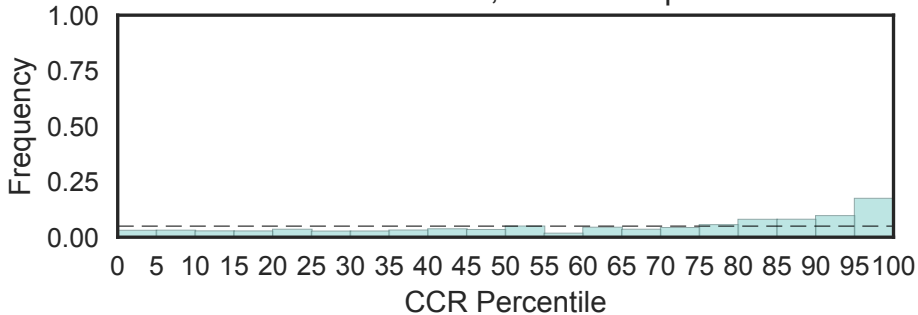

Annexin-2 receptor  
(ANXA2R, N=1)

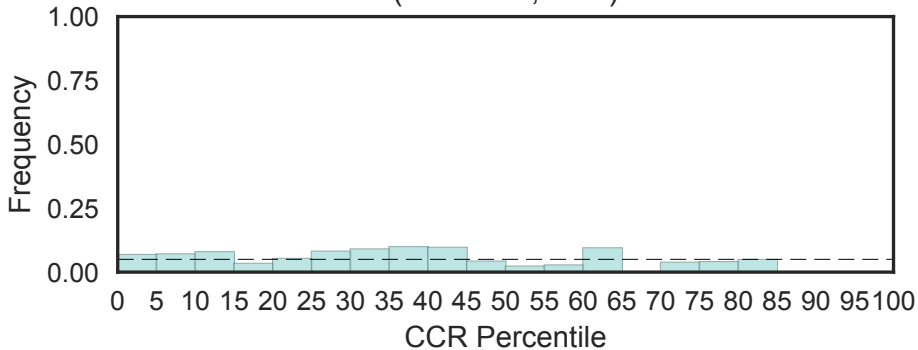

AP-5 complex subunit sigma-1  
(AP-5\_subunit\_s1, N=1)

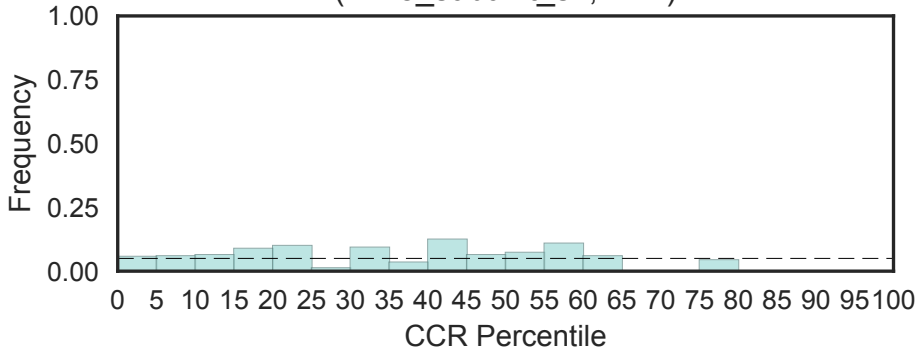

AP-1 complex-associated regulatory protein  
(AP1AR, N=1)

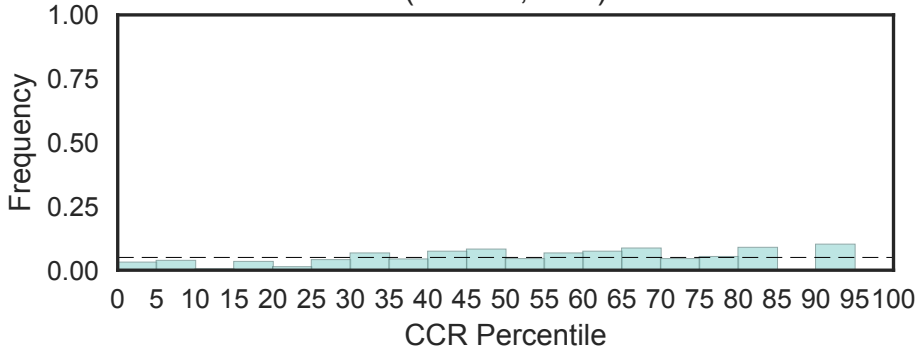



Clathrin-adaptor complex-3 beta-1 subunit C-terminal  
(AP3B1\_C, N=2)

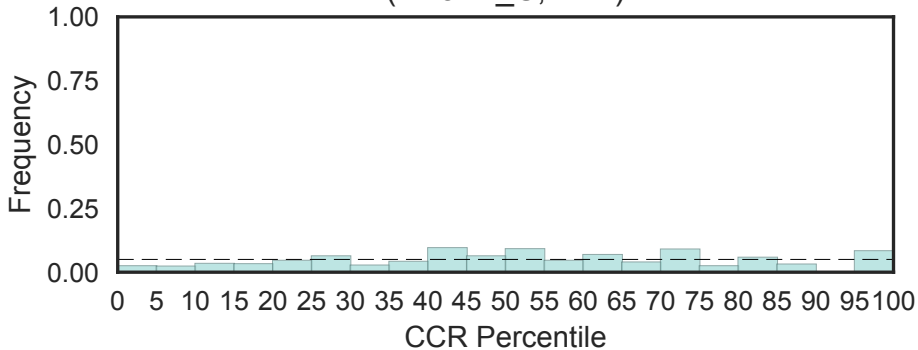

AP-3 complex subunit delta-1  
(AP3D1, N=1)

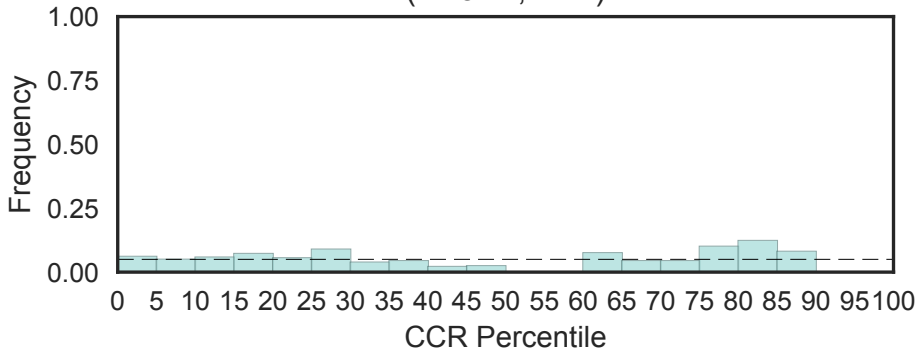

Adaptin AP4 complex epsilon appendage platform  
(AP4E\_app\_platf, N=1)

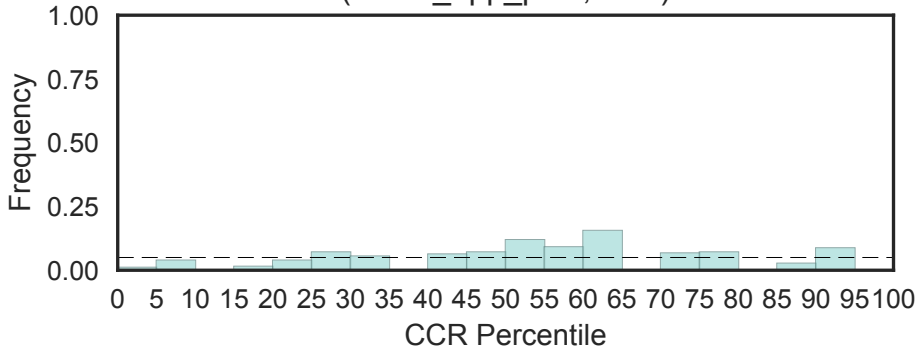

Adenomatosis polyposis coli down-regulated 1  
(APCDDC, N=4)

Fisher's OR: 0; Bonferroni p-val: 1

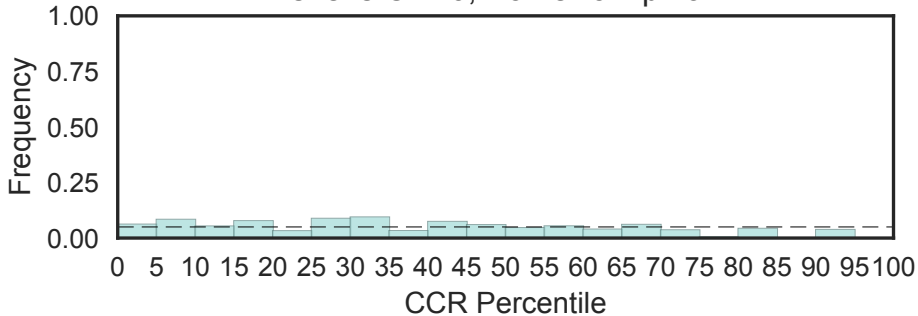

APC 15 residue motif  
(APC\_15aa, N=4)

Fisher's OR: 0; Bonferroni p-val: 1

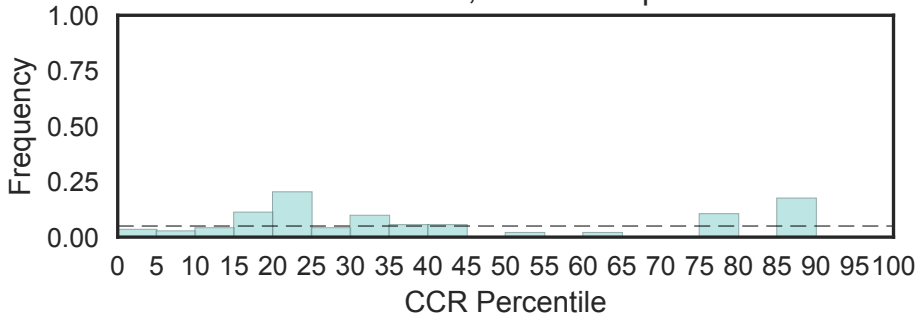

Coiled-coil N-terminus of APC, dimerisation domain  
(APC\_N\_CC, N=2)

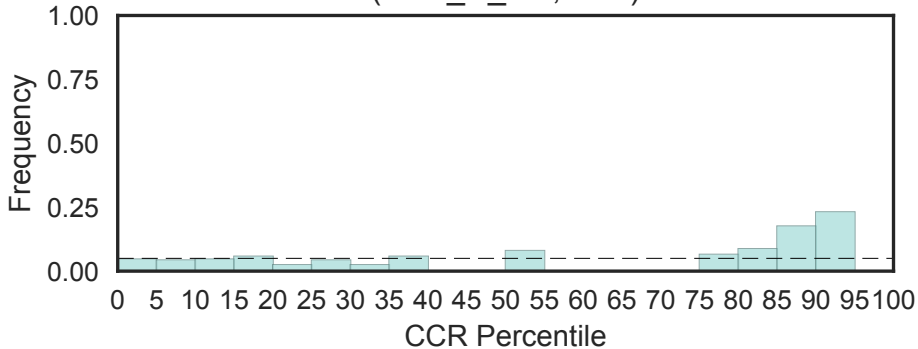

APC basic domain  
(APC\_basic, N=2)

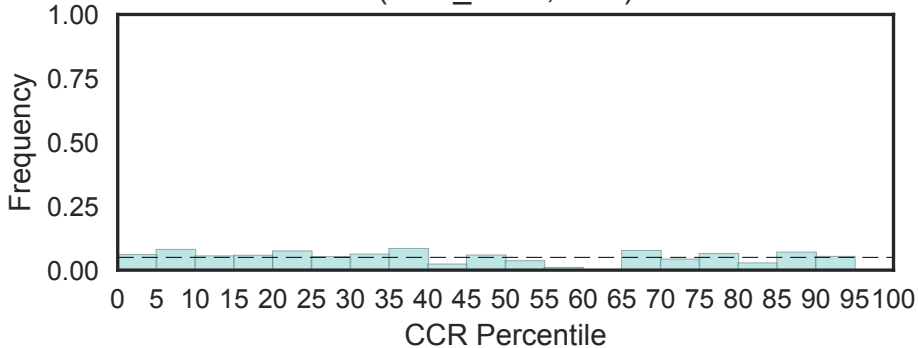

APC repeat  
(APC\_r, N=11)

Fisher's OR: 1.48; Bonferroni p-val: 1

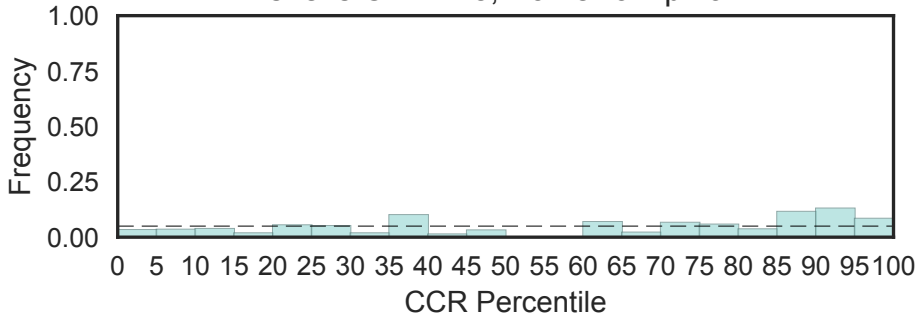



Unstructured region on APC between APC\_crr and SAMP  
(APC\_u13, N=1)

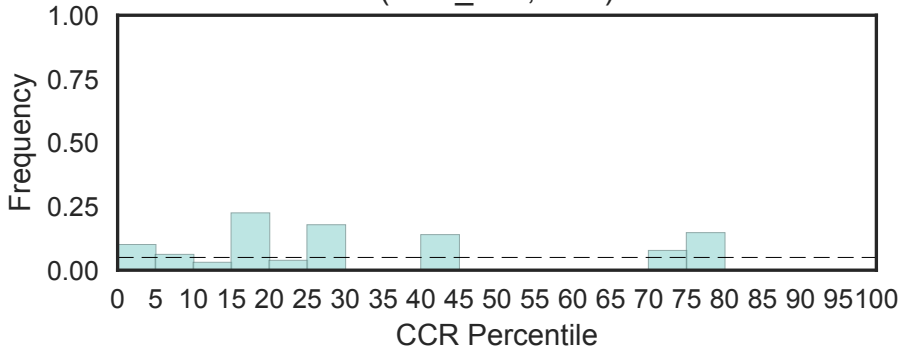

# Unstructured region on APC between SAMP and APC\_crr (APC\_u14, N=1)

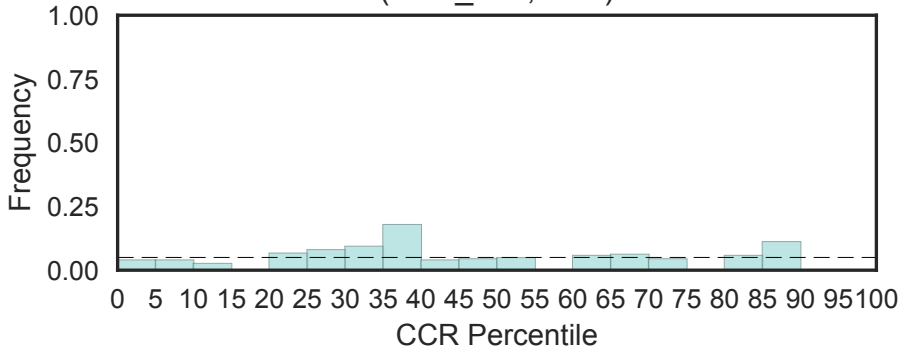

# Unstructured region on APC between APC\_crr regions 5 and 6 (APC\_u15, N=1)

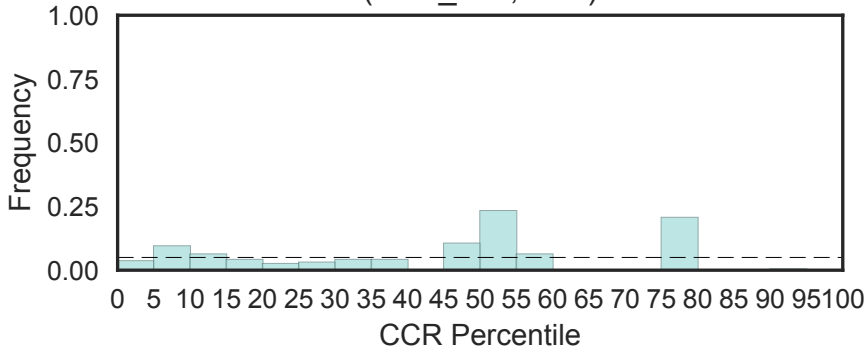

Unstructured region on APC between 1st and 2nd catenin-bdg motifs  
(APC\_u5, N=1)

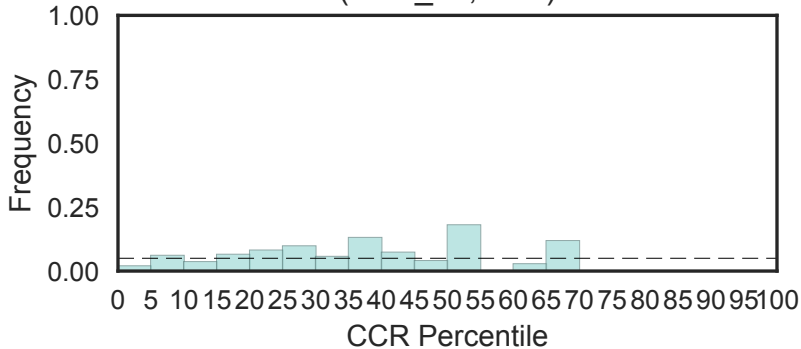

# Unstructured region on APC between 1st two creatine-rich regions (APC\_u9, N=1)

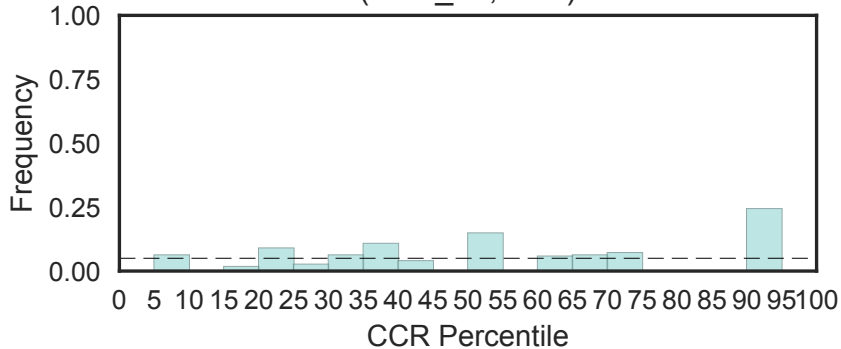

Ubiquitin-like autophagy protein Apg12  
(APG12, N=7)

Fisher's OR: 0; Bonferroni p-val: 1

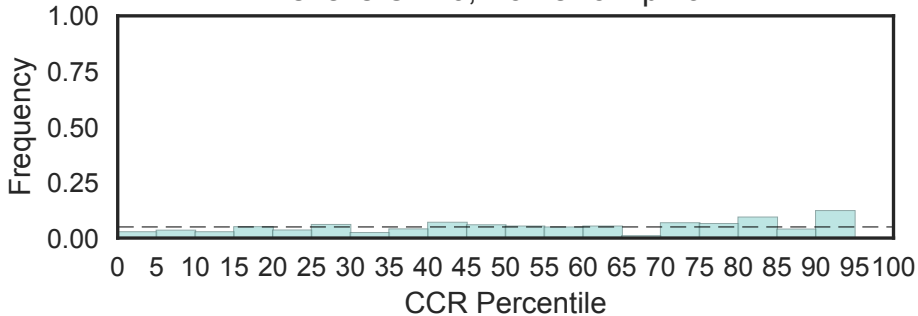

# Autophagy protein Apg5 (APG5, N=1)

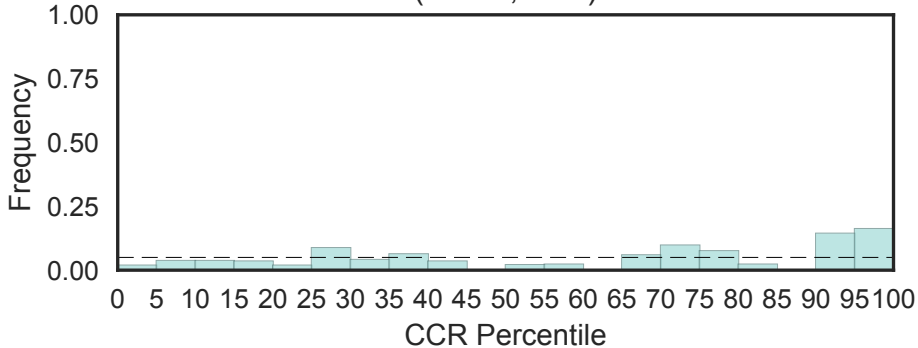

Autophagy protein Apg6  
(APG6, N=1)

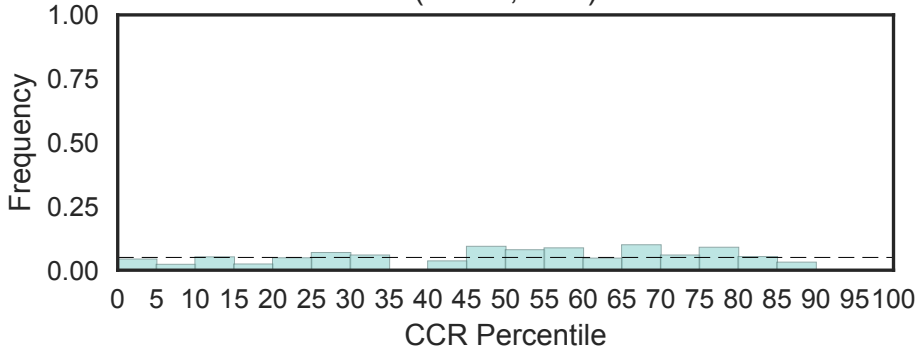



# Autophagy protein Apg9 (APG9, N=2)

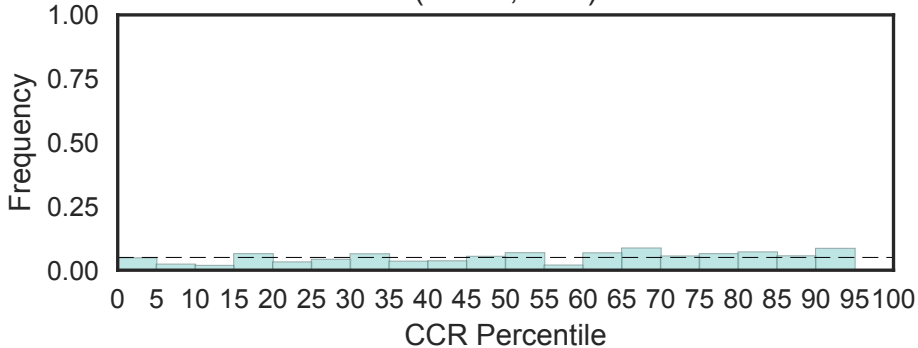

Phosphotransferase enzyme family  
(APH, N=15)

Fisher's OR: 0.628; Bonferroni p-val: 1

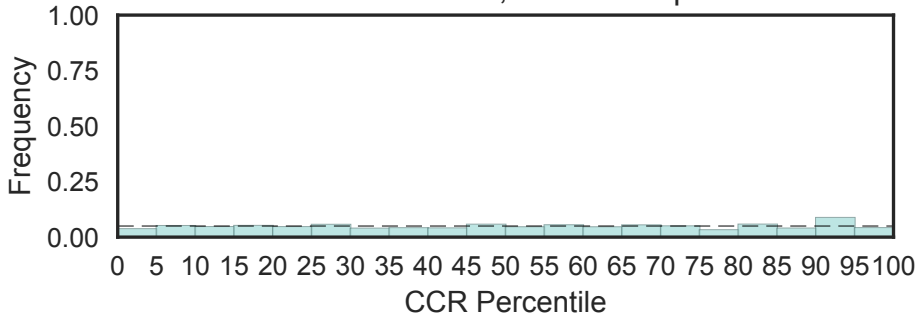

# Apoptosis inhibitory protein 5 (API5) (API5, N=1)

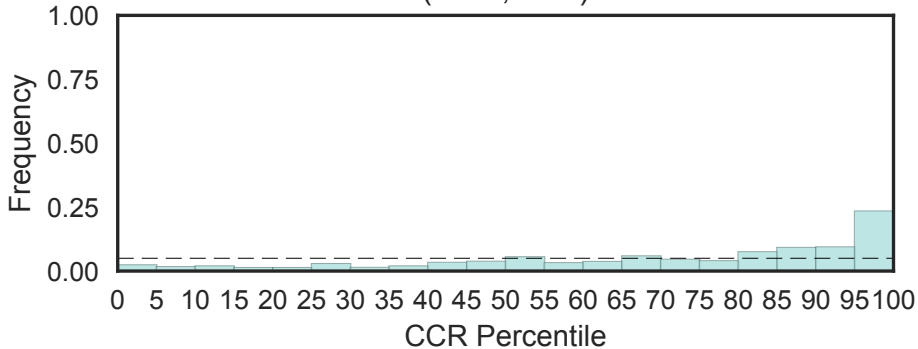

APOBEC-like C-terminal domain  
(APOBEC\_C, N=14)

Fisher's OR: 0.424; Bonferroni p-val: 1

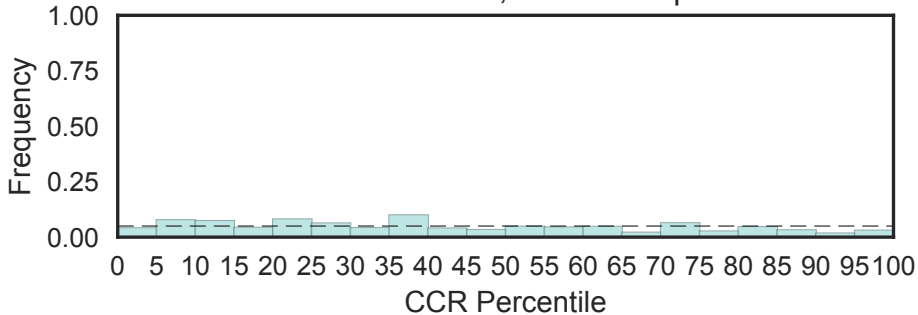

APOBEC-like N-terminal domain  
(APOBEC\_N, N=14)

Fisher's OR: 0.194; Bonferroni p-val: 1

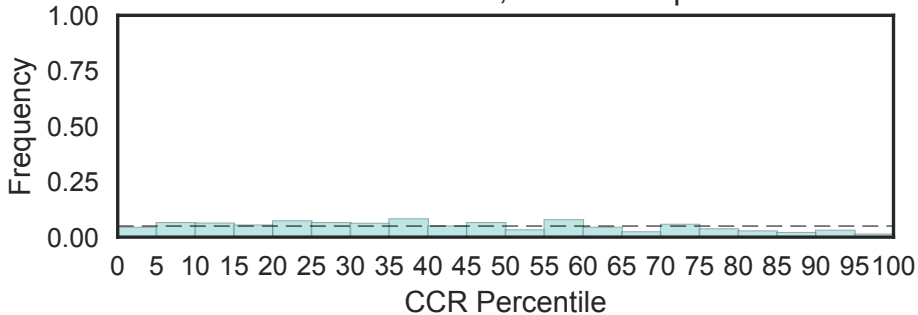

Copper-binding of amyloid precursor, CuBD  
(APP\_Cu\_bd, N=3)

Fisher's OR: 0; Bonferroni p-val: 1

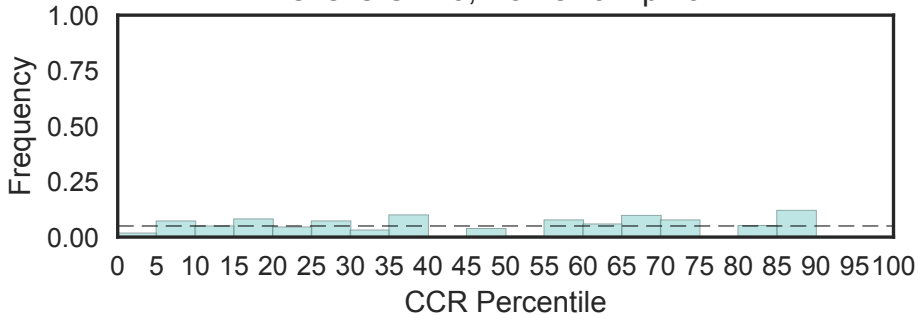

E2 domain of amyloid precursor protein  
(APP\_E2, N=3)

Fisher's OR: 0.48; Bonferroni p-val: 1

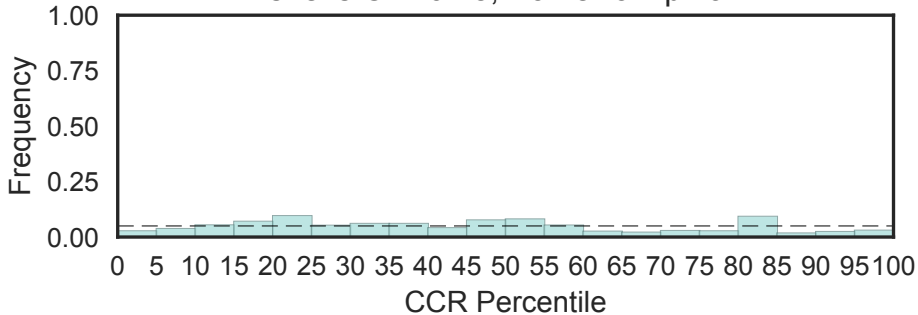

Amyloid A4 N-terminal heparin-binding  
(APP\_N, N=3)

Fisher's OR: 0.522; Bonferroni p-val: 1

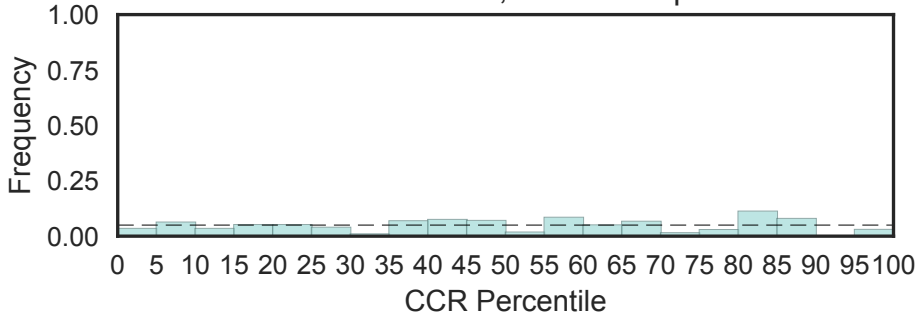



beta-amyloid precursor protein C-terminus  
(APP\_amyloid, N=3)

Fisher's OR: 2.12; Bonferroni p-val: 1

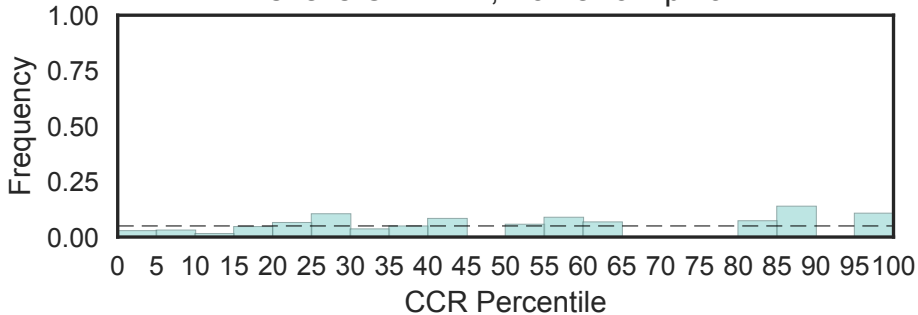

Adenylylsulphate kinase  
(APS\_kinase, N=2)

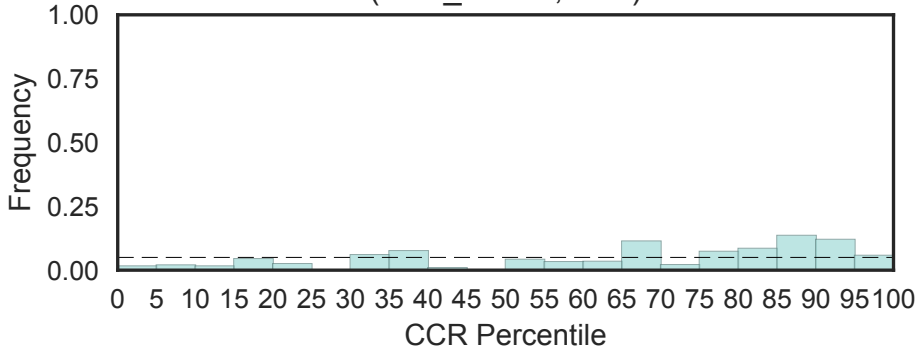

Xylose isomerase-like TIM barrel  
(AP\_endonuc\_2, N=2)

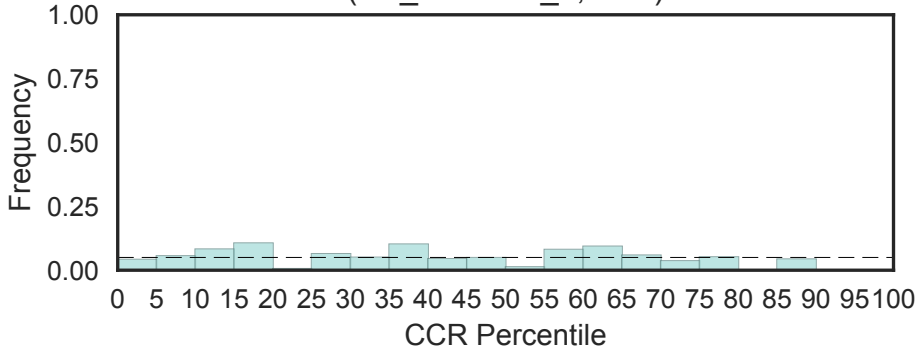

Nuclear coactivator  
(ARA70, N=2)

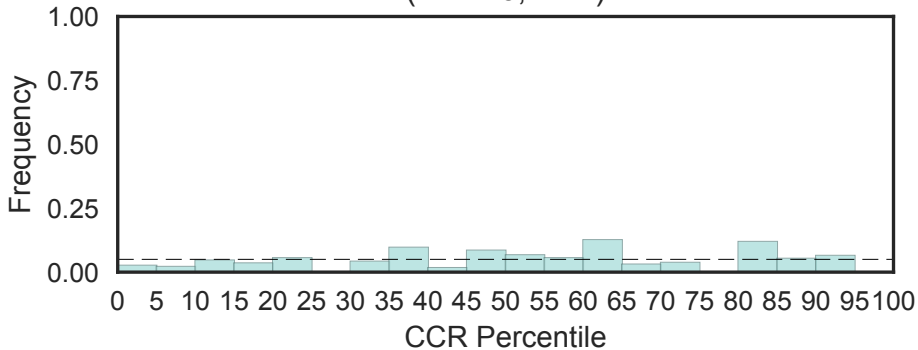

ARD/ARD' family  
(ARD, N=1)

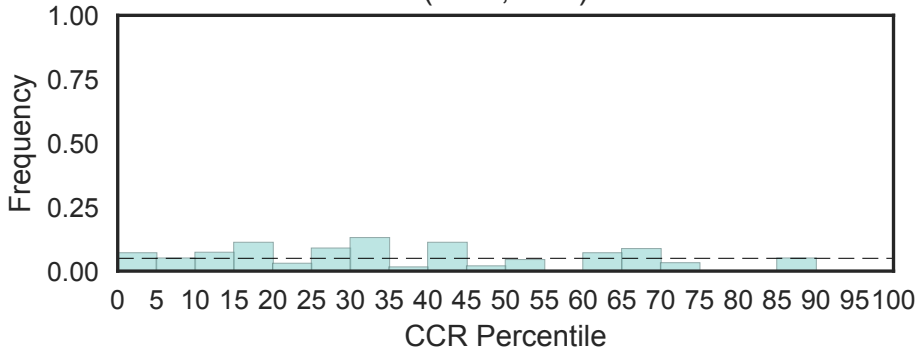

ARF7 effector protein C-terminus  
(ARF7EP\_C, N=3)

Fisher's OR: 0; Bonferroni p-val: 1

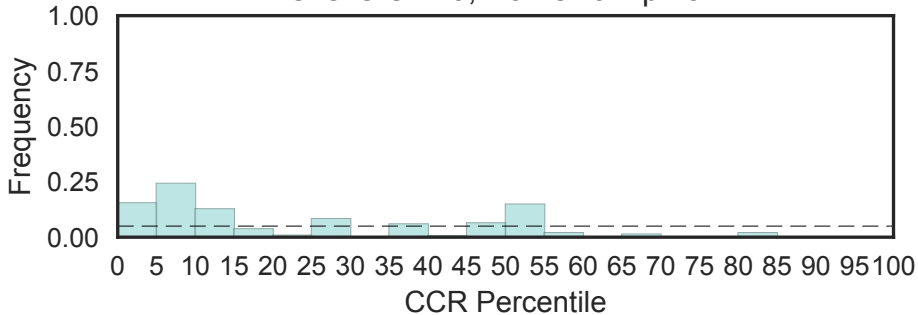

Arginine and glutamate-rich 1  
(ARGLU, N=1)

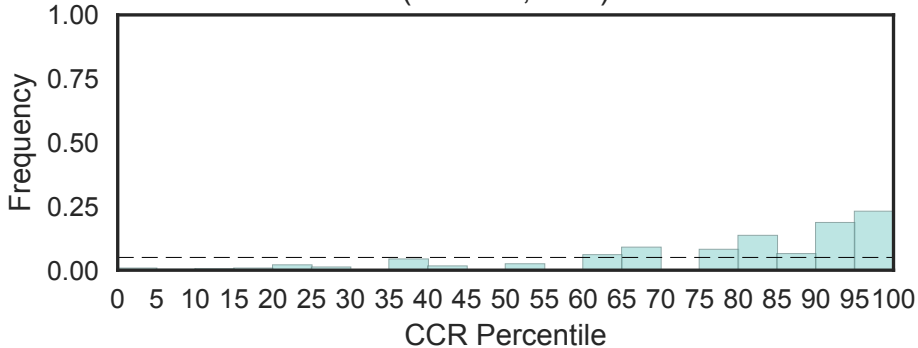

ARID/BRIGHT DNA binding domain  
(ARID, N=13)

Fisher's OR: 7.18; Bonferroni p-val: 0.00019

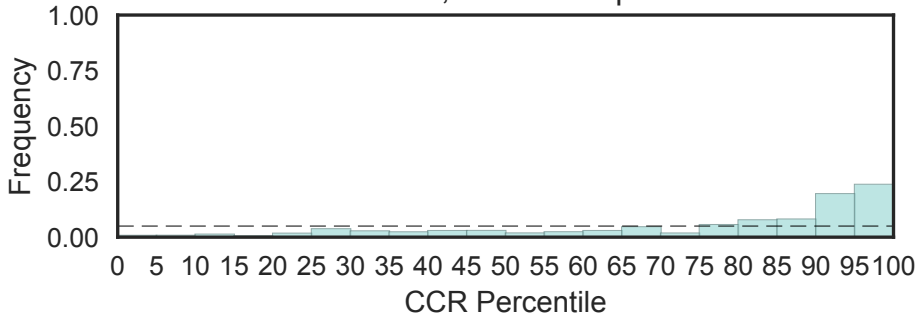



The ARF-like 2 binding protein BART  
(ARL2\_Bind\_BART, N=2)

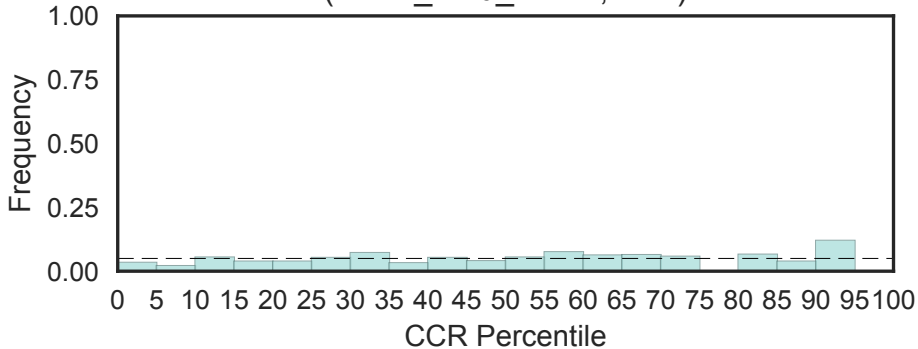

# Haemopoietic lineage transmembrane helix (ARL6IP6, N=1)

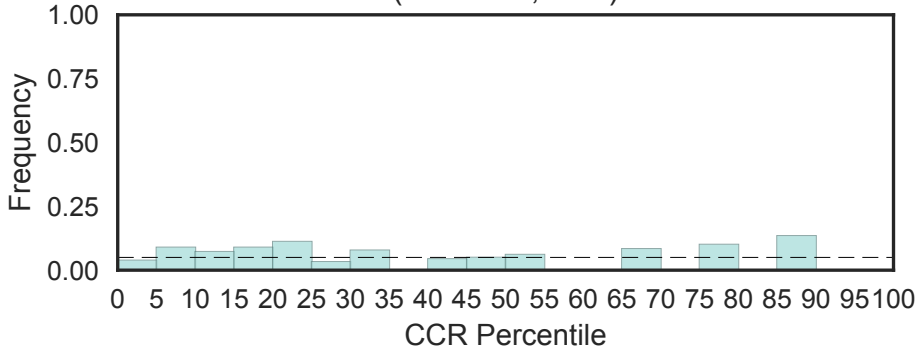

# Active regulator of SIRT1, or 40S ribosomal protein S19-binding 1 (AROS, N=1)

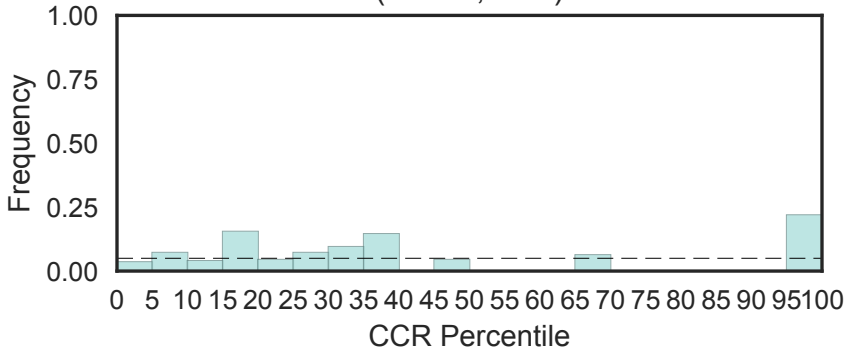

ARP2/3 complex 20 kDa subunit (ARPC4)  
(ARPC4, N=2)

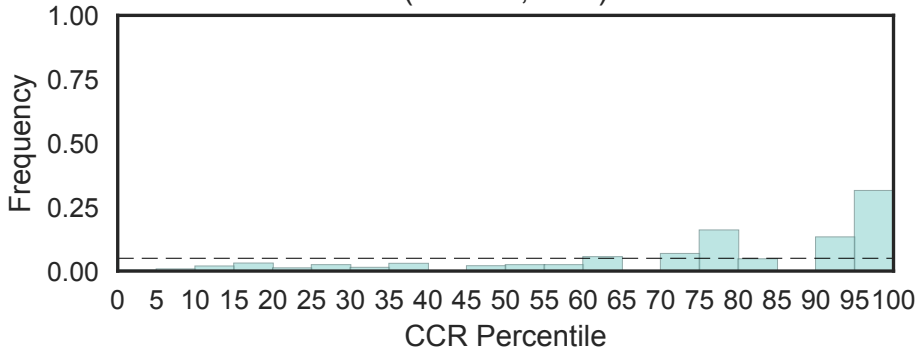

Arsenite-resistance protein 2  
(ARS2, N=1)

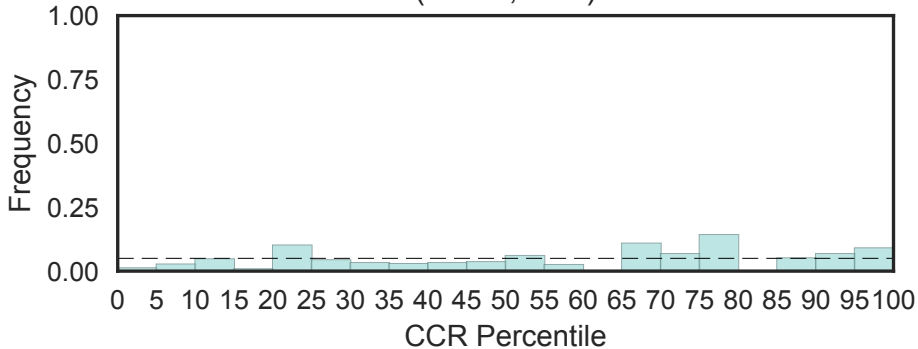

NAD:arginine ADP-ribosyltransferase  
(ART, N=4)

Fisher's OR: 0; Bonferroni p-val: 1

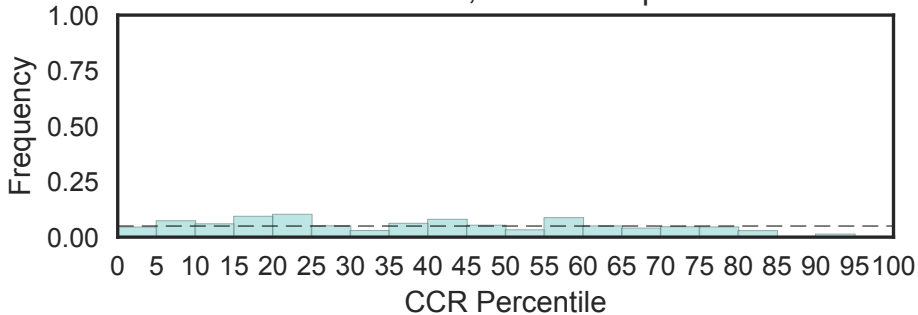

Amiloride-sensitive sodium channel  
(ASC, N=9)

Fisher's OR: 0.424; Bonferroni p-val: 1

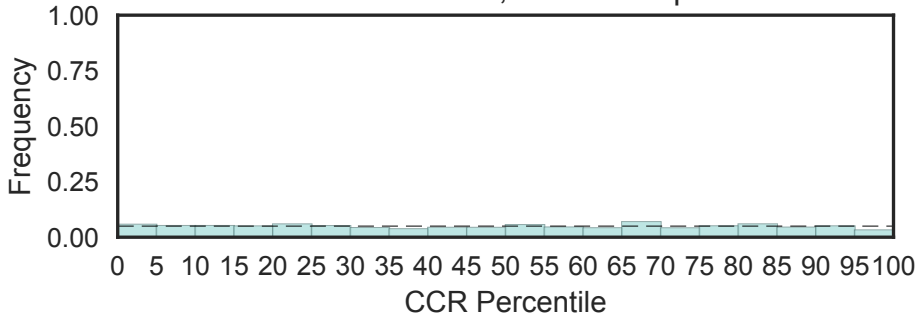

ASCH domain  
(ASCH, N=1)

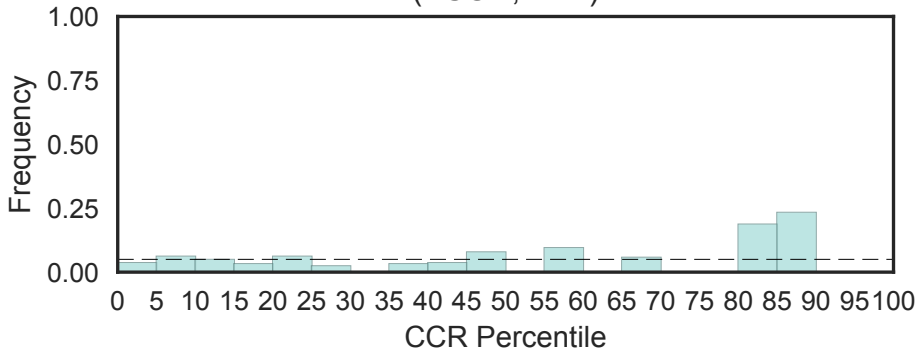



Apx/Shroom domain ASD1  
(ASD1, N=2)

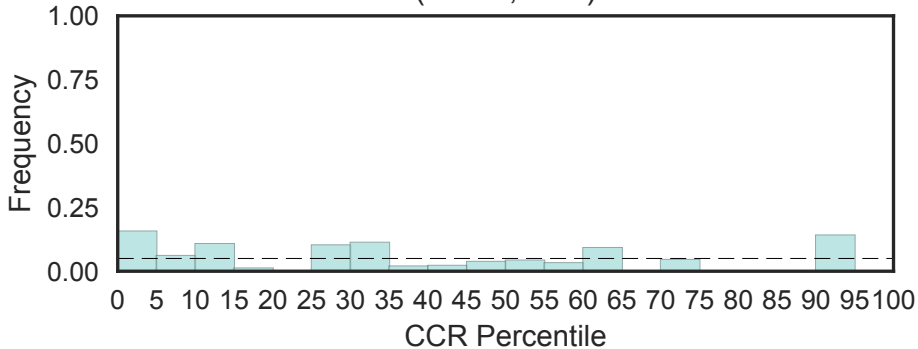

Apx/Shroom domain ASD2  
(ASD2, N=2)

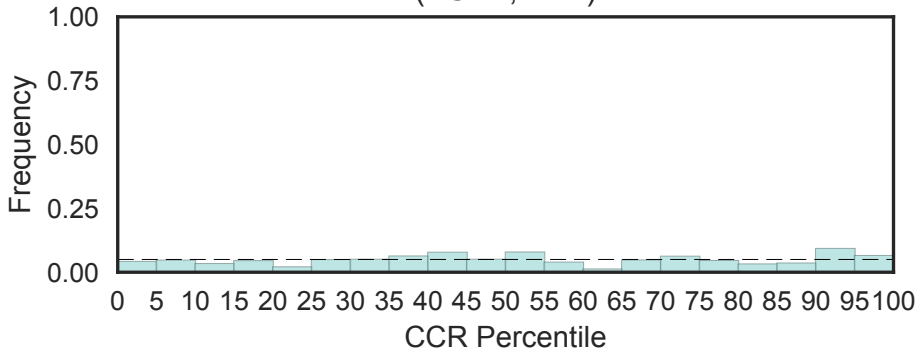

ASF1 like histone chaperone  
(ASF1\_hist\_chap, N=2)

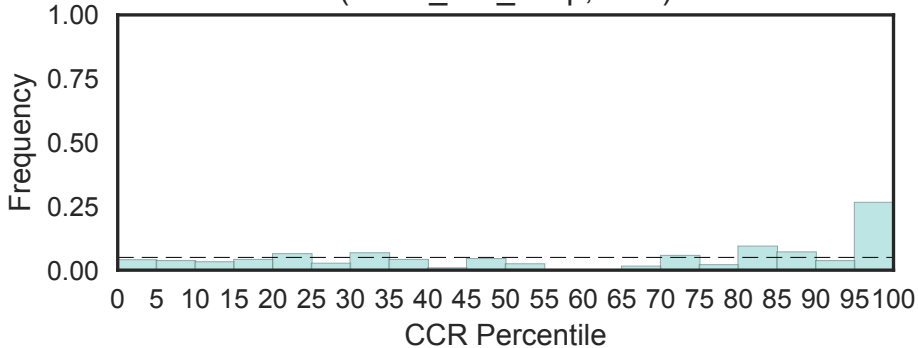

Abnormal spindle-like microcephaly-assoc'd, ASPM-SPD-2-Hydin  
(ASH, N=3)

Fisher's OR: 0; Bonferroni p-val: 1

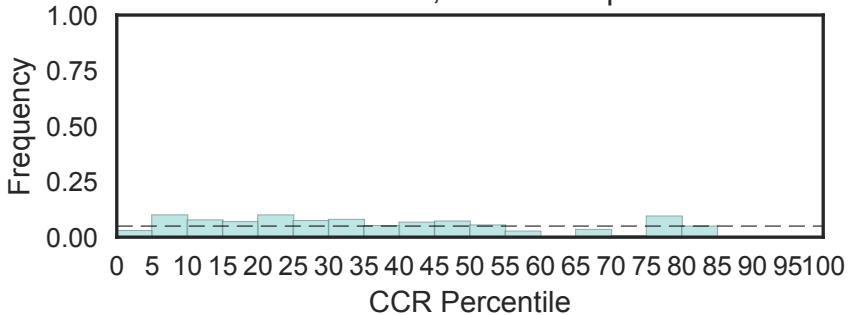

Argininosuccinate lyase C-terminal  
(ASL\_C2, N=2)

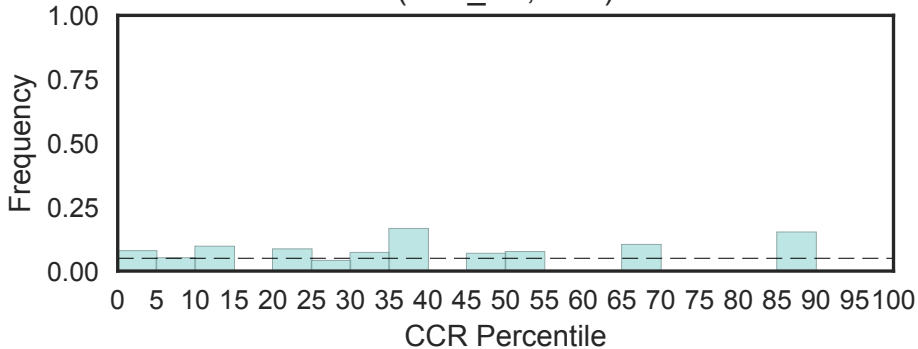

Asx homology domain  
(ASXH, N=3)

Fisher's OR: 1.09; Bonferroni p-val: 1

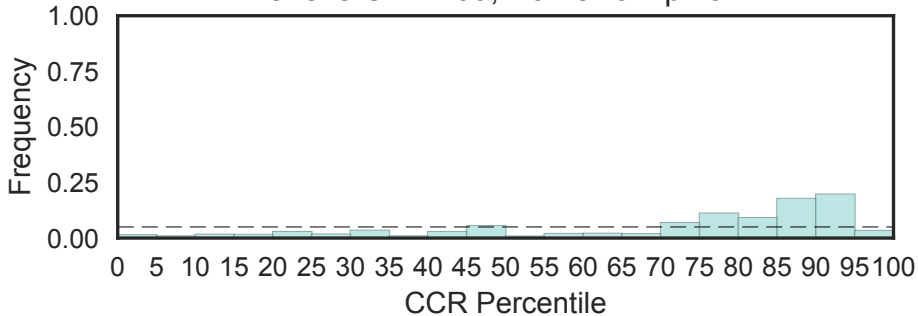

ATPase family AAA domain containing 4  
(ATAD4, N=2)

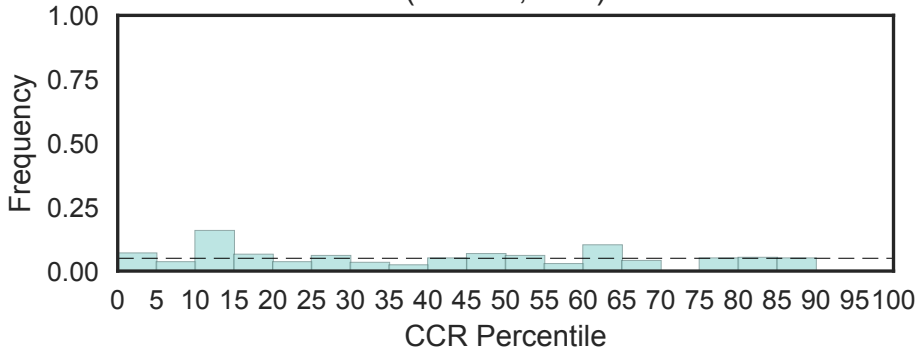

Arginine-tRNA-protein transferase, C terminus  
(ATE\_C, N=1)

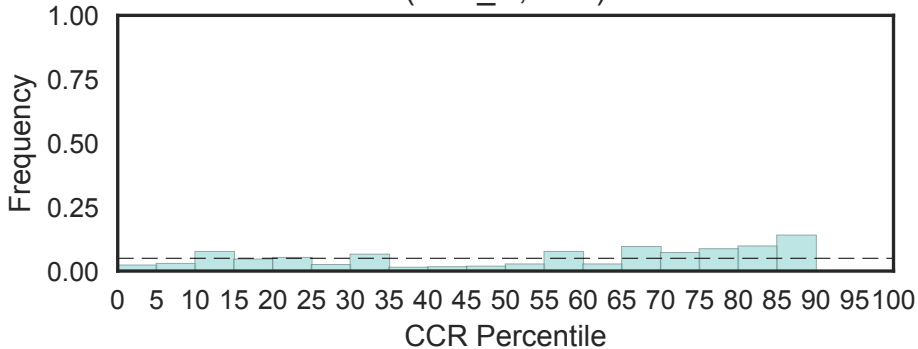



Arginine-tRNA-protein transferase, N terminus  
(ATE\_N, N=1)

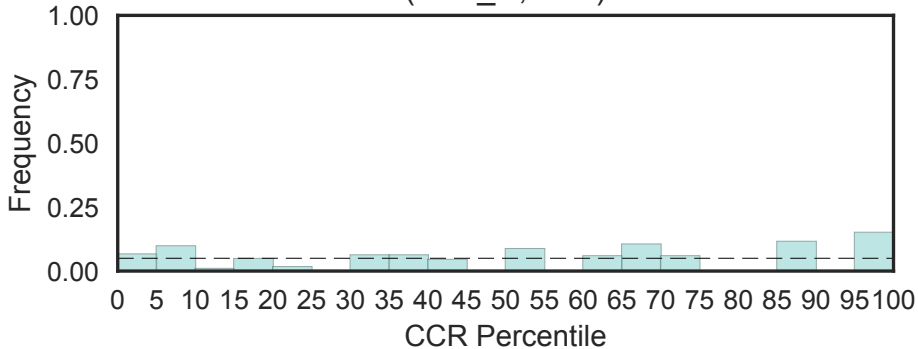

ATF-interacting protein binding domain  
(ATF7IP\_BD, N=2)

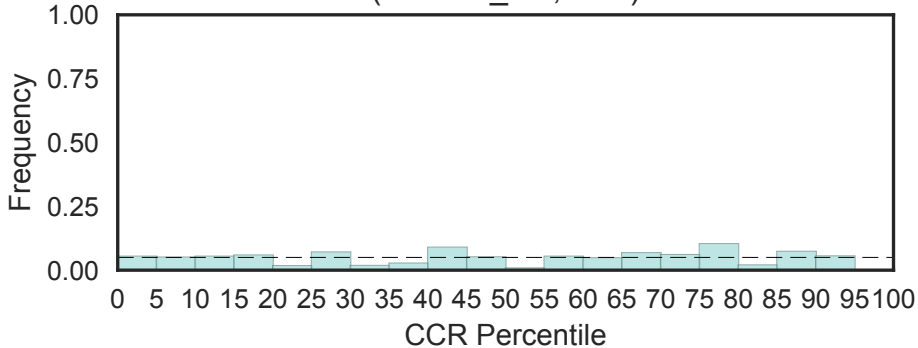

# Autophagy-related protein 101 (ATG101, N=1)

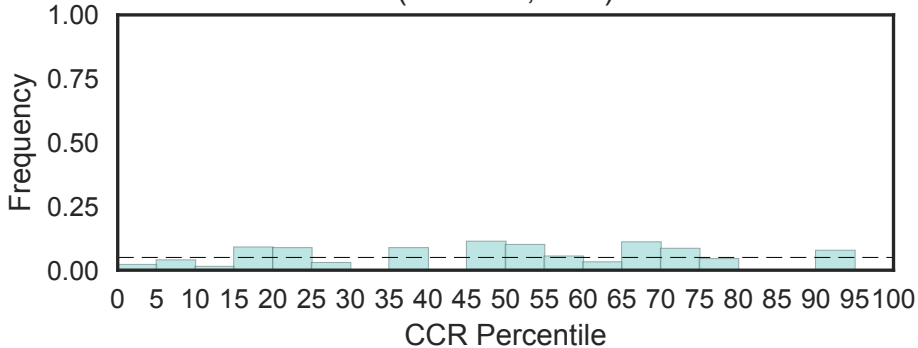

# Autophagy-related protein 11 (ATG11, N=1)

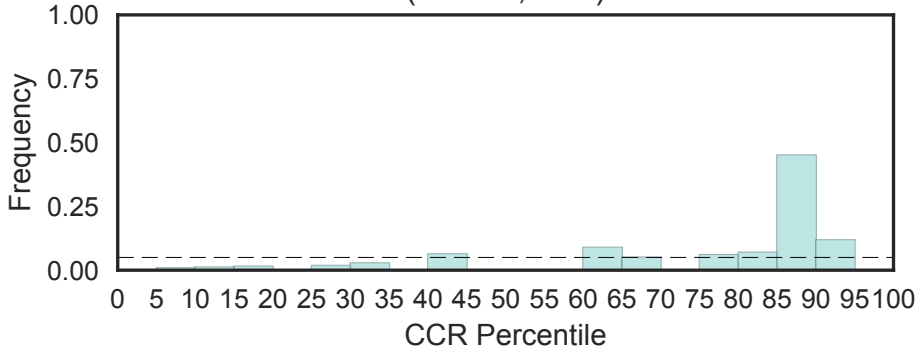

# Autophagy-related protein 13 (ATG13, N=1)

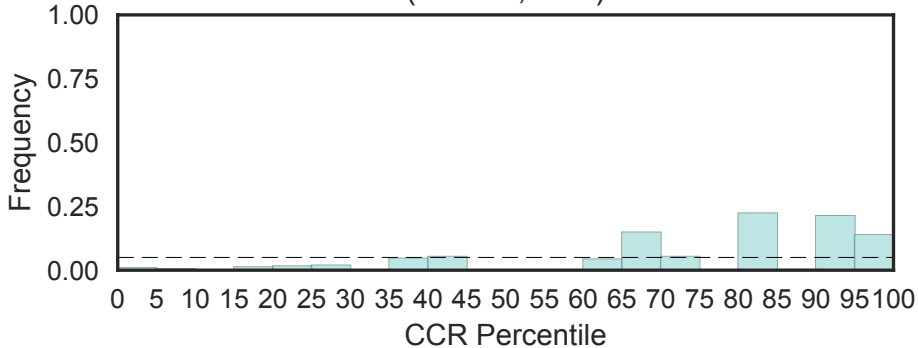

Autophagy protein 16 (ATG16)  
(ATG16, N=3)

Fisher's OR: 0; Bonferroni p-val: 1

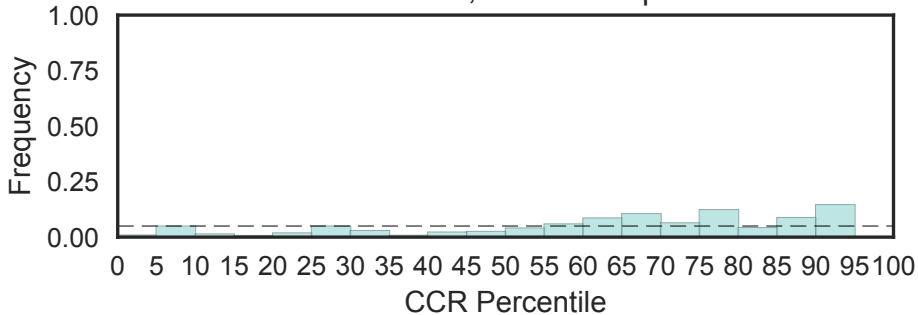

Vacuole effluxer Atg22 like  
(ATG22, N=1)

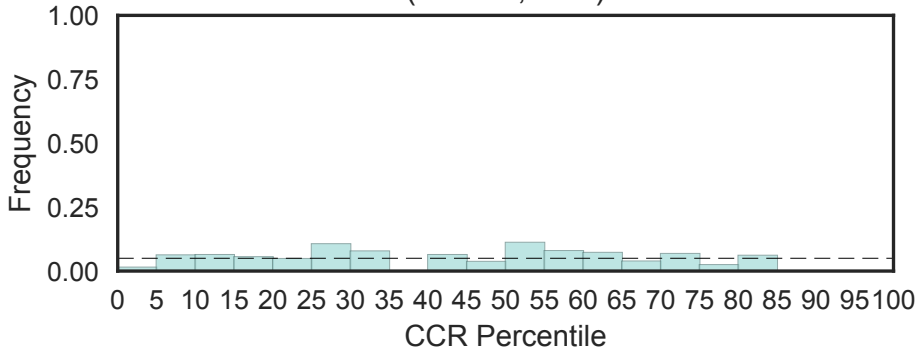

Autophagy-related protein 27  
(ATG27, N=4)

Fisher's OR: 0.92; Bonferroni p-val: 1

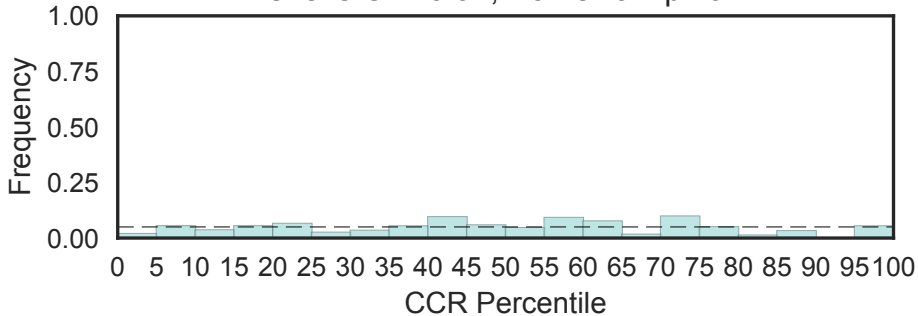



Autophagy-related protein 2 CAD motif  
(ATG2\_CAD, N=2)

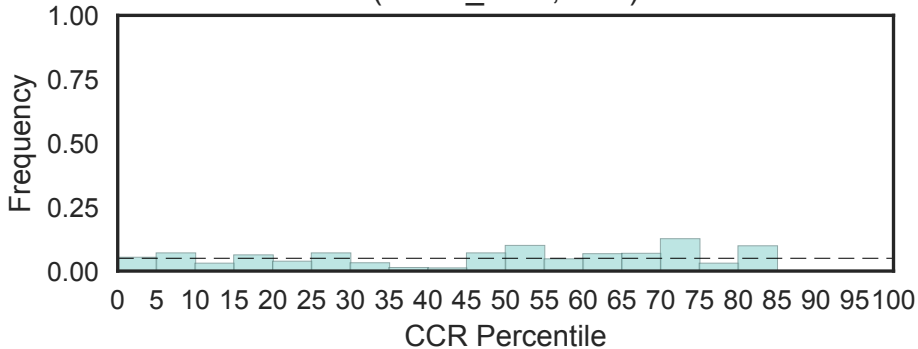

# Ubiquitin-like modifier-activating enzyme ATG7 N-terminus (ATG7\_N, N=1)

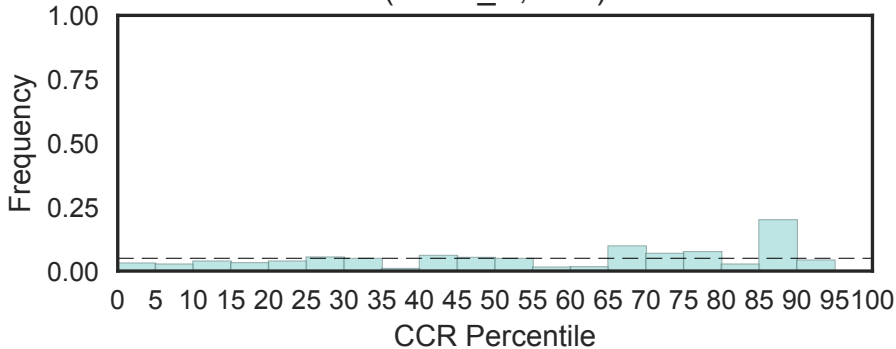

Autophagy-related protein C terminal domain  
(ATG\_C, N=4)

Fisher's OR: 0; Bonferroni p-val: 1

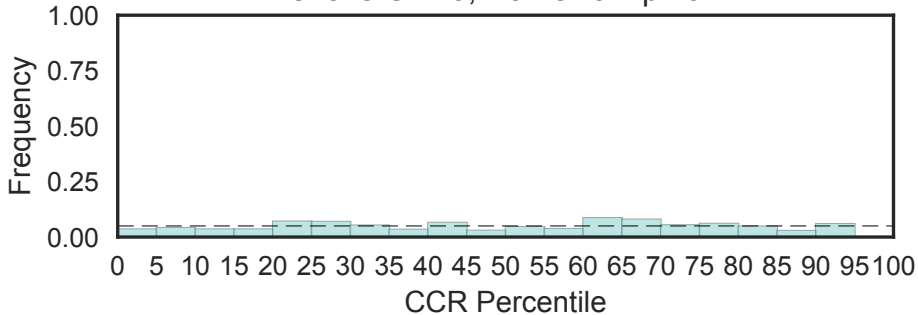

ATP cone domain  
(ATP-cone, N=1)

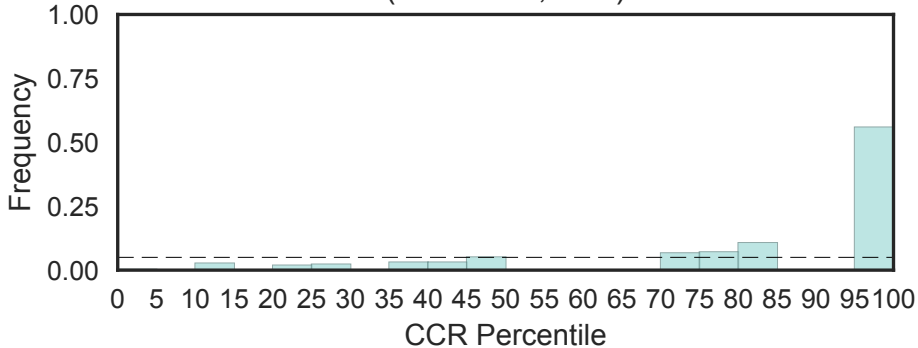

ATP-grasp domain  
(ATP-grasp, N=8)

Fisher's OR: 2.06; Bonferroni p-val: 1

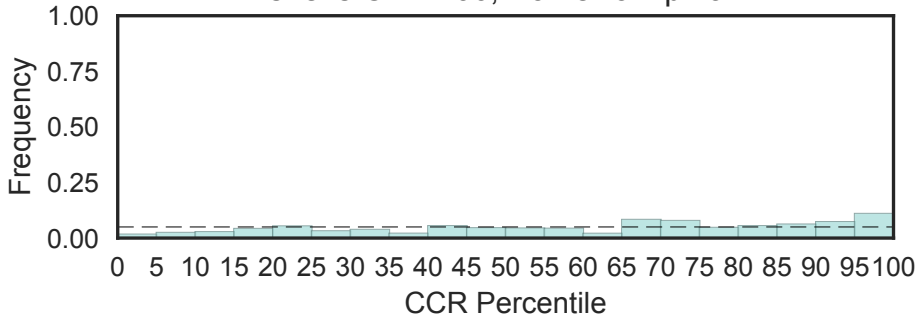

ATP-grasp domain  
(ATP-grasp\_2, N=2)

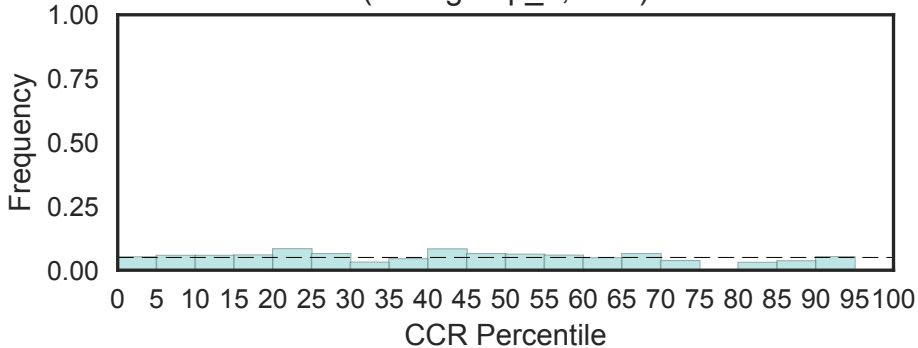

ATP-grasp domain  
(ATP-grasp\_3, N=4)

Fisher's OR: 1.28; Bonferroni p-val: 1

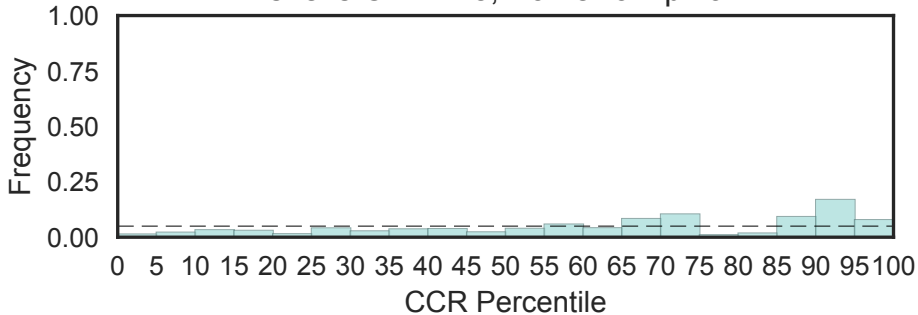

ATP-grasp domain  
(ATP-grasp\_4, N=1)

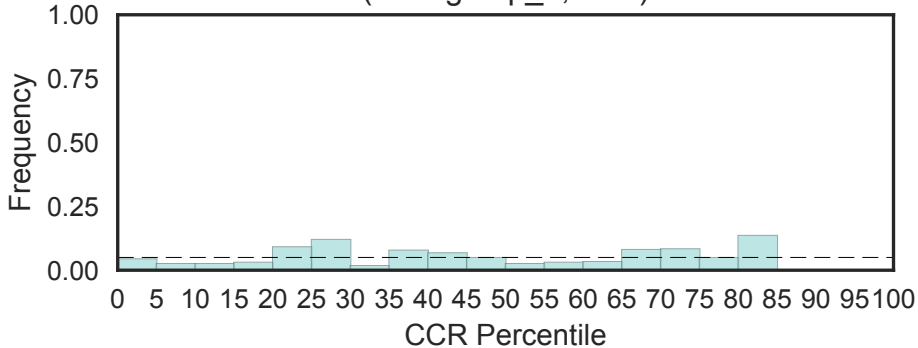



ATP-grasp domain  
(ATP-grasp\_5, N=2)

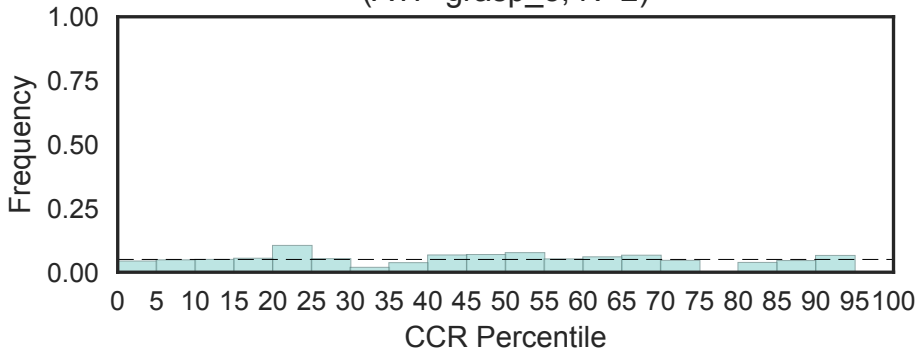

ATP:guanido phosphotransferase, C-terminal catalytic domain  
(ATP-gua\_Ptrans, N=5)

Fisher's OR: 2.14; Bonferroni p-val: 1

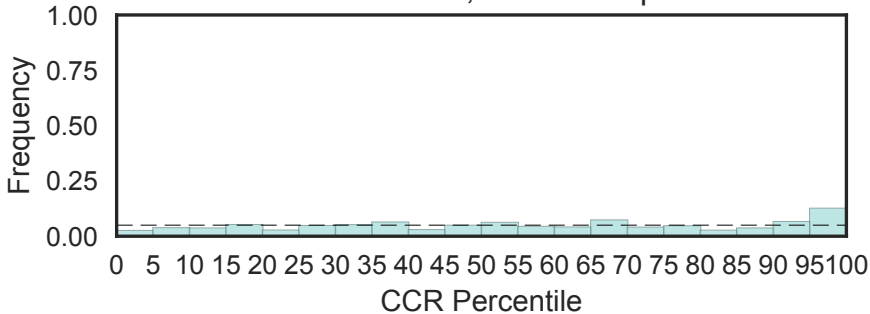

ATP:guanido phosphotransferase, N-terminal domain  
(ATP-gua\_PtransN, N=5)

Fisher's OR: 0; Bonferroni p-val: 1

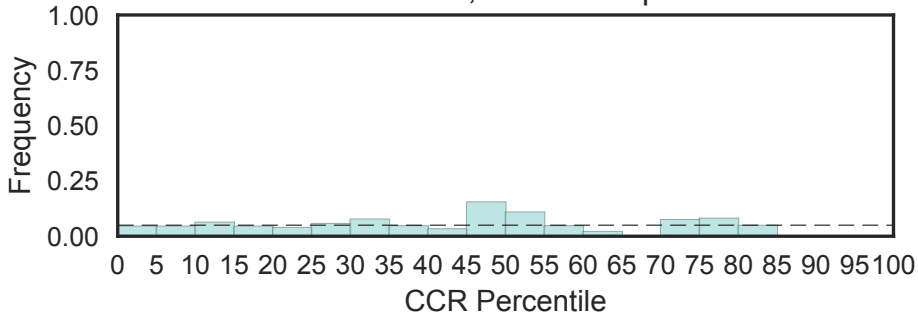

# ATP-sulfurylase (ATP-sulfurylase, N=2)

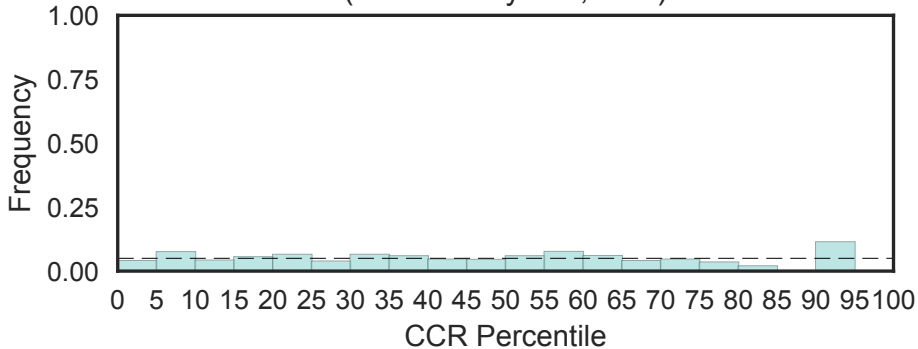

# ATP synthase (ATP-synt, N=1)

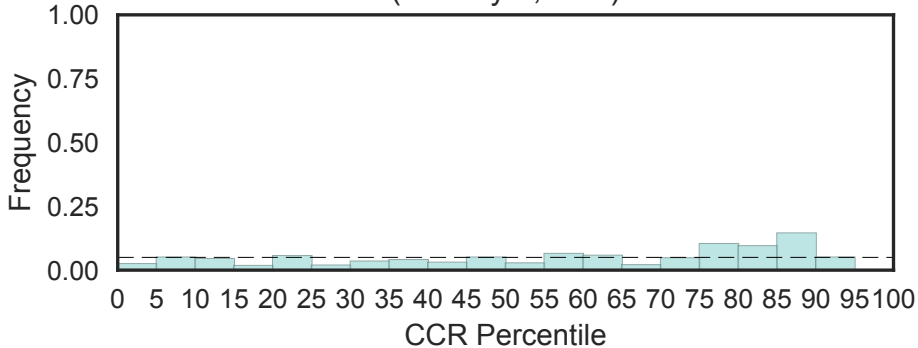

ATP synthase subunit C  
(ATP-synt\_C, N=9)

Fisher's OR: 6.47; Bonferroni p-val: 0.972

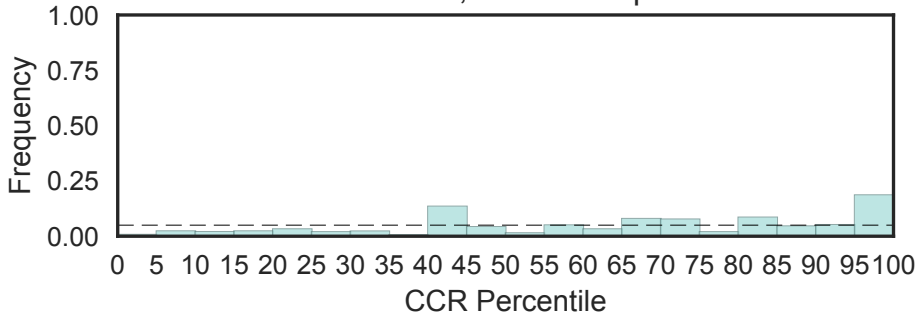

ATP synthase subunit D  
(ATP-synt\_D, N=1)

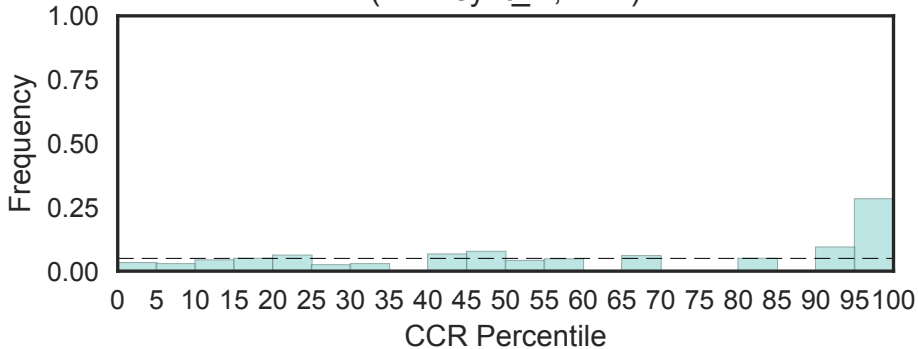

ATP synthase, Delta/Epsilon chain, beta-sandwich domain  
(ATP-synt\_DE\_N, N=1)

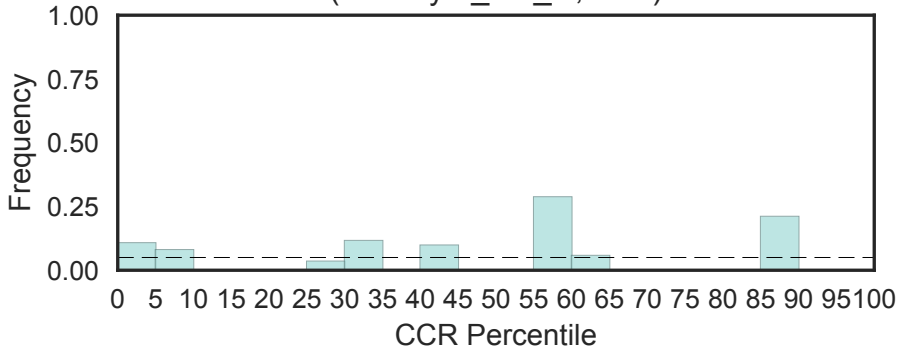



ATP synthase E chain  
(ATP-synt\_E, N=1)

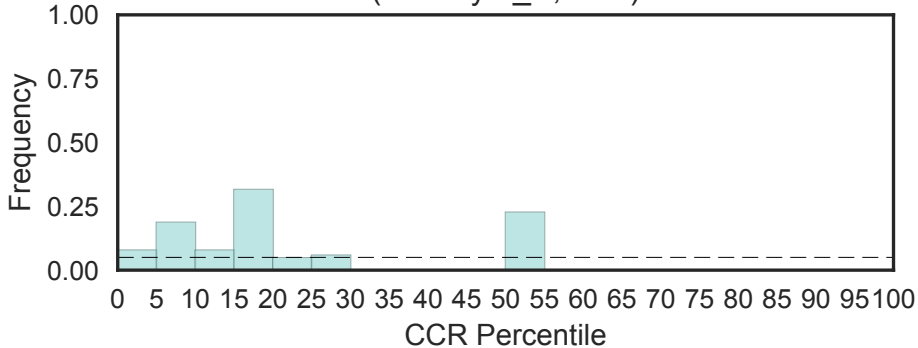

Mitochondrial ATP synthase epsilon chain  
(ATP-synt\_Eps, N=1)

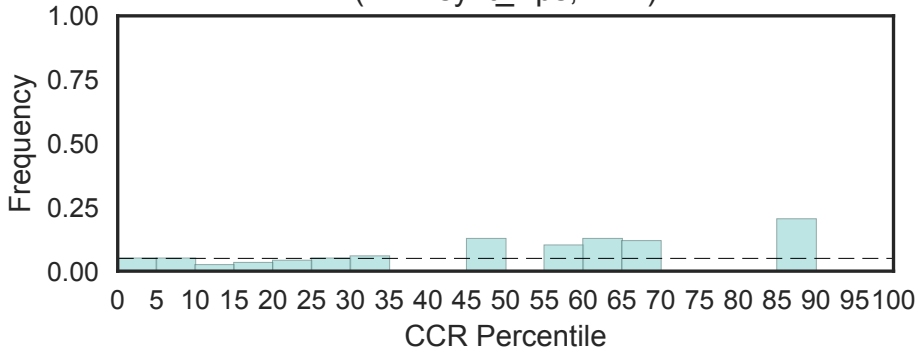

ATP synthase (F/14-kDa) subunit  
(ATP-synt\_F, N=1)

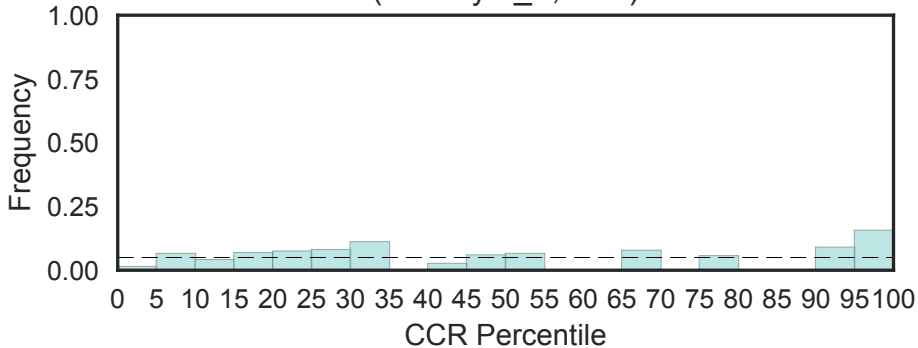

Mitochondrial ATP synthase coupling factor 6  
(ATP-synt\_F6, N=1)

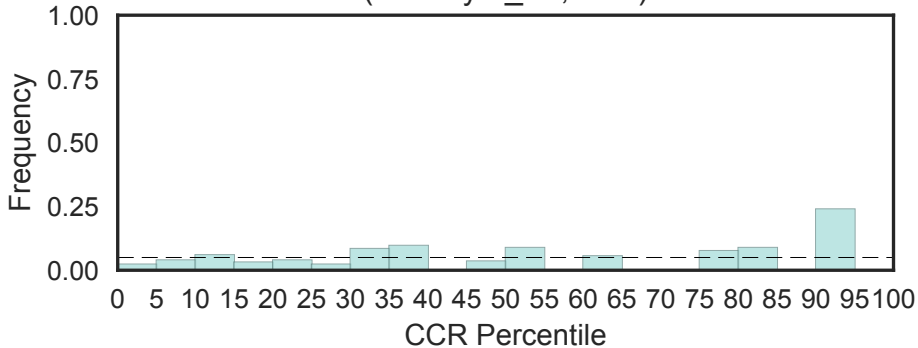

Mitochondrial ATP synthase g subunit  
(ATP-synt\_G, N=2)

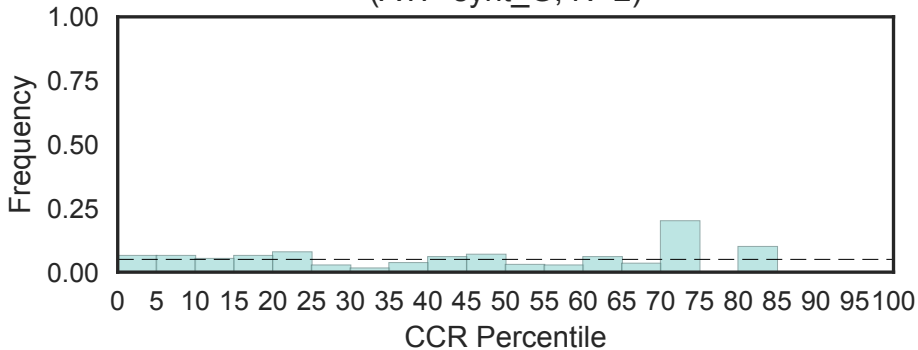

Vacuolar ATP synthase subunit S1 (ATP6S1)  
(ATP-synt\_S1, N=1)

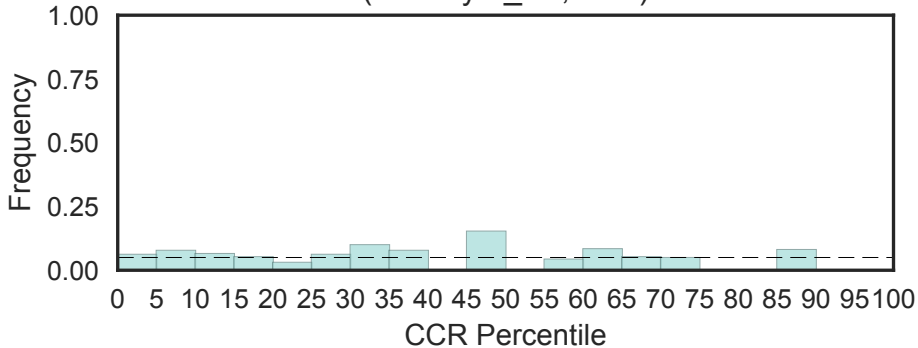

ATP synthase alpha/beta family, nucleotide-binding domain  
(ATP-synt\_ab, N=5)

Fisher's OR: 5.3; Bonferroni p-val: 0.0359

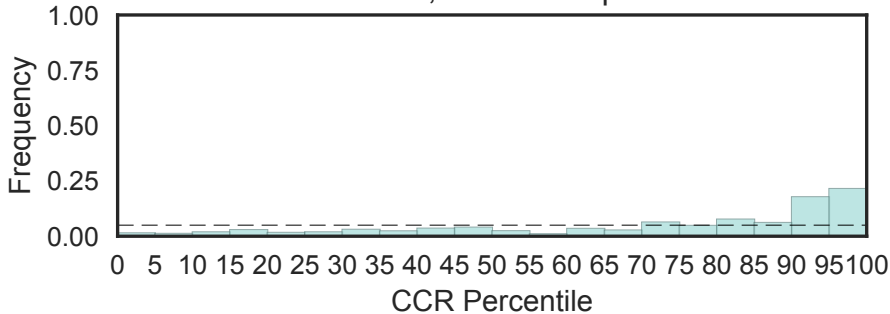

ATP synthase alpha/beta chain, C terminal domain  
(ATP-synt\_ab\_C, N=1)

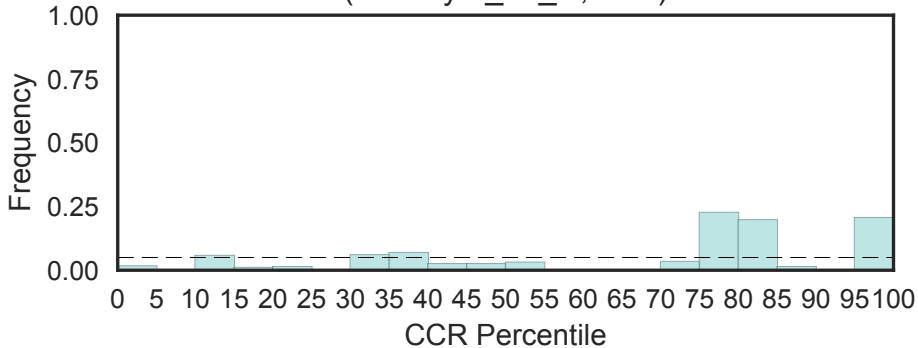



ATP synthase alpha/beta family, beta-barrel domain  
(ATP-synt\_ab\_N, N=5)

Fisher's OR: 2.46; Bonferroni p-val: 1

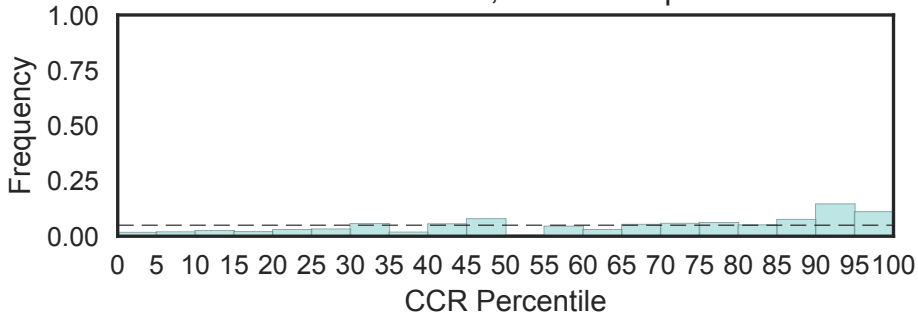

ATPsynthase alpha/beta subunit N-term extension  
(ATP-synt\_ab\_Xtn, N=1)

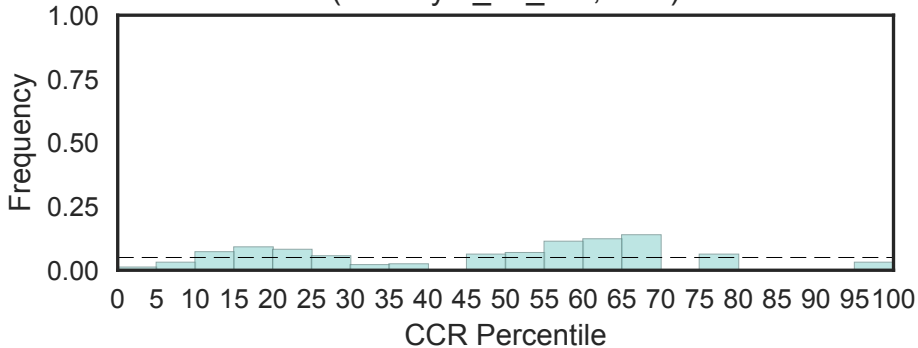

ATP11 protein  
(ATP11, N=2)

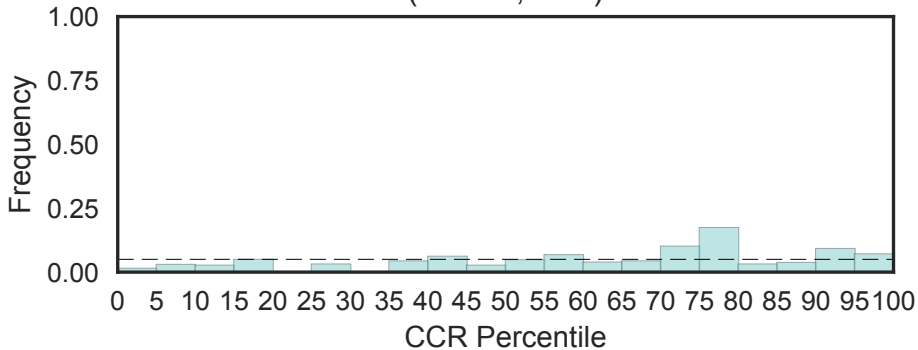

# ATP12 chaperone protein (ATP12, N=1)

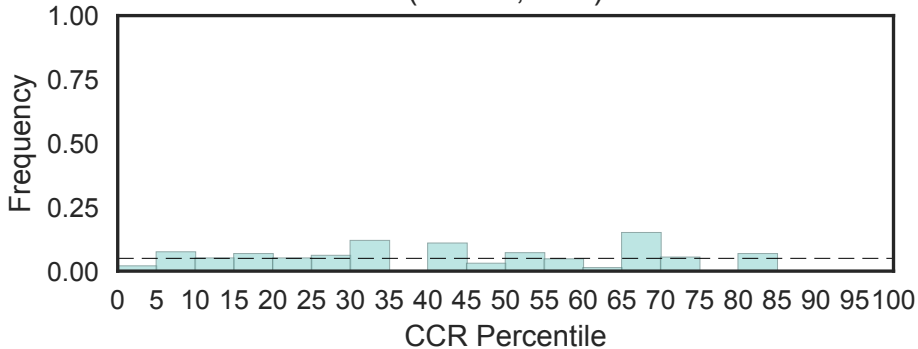

ATP1G1/PLM/MAT8 family  
(ATP1G1\_PLM\_MAT8, N=9)  
Fisher's OR: 0; Bonferroni p-val: 1

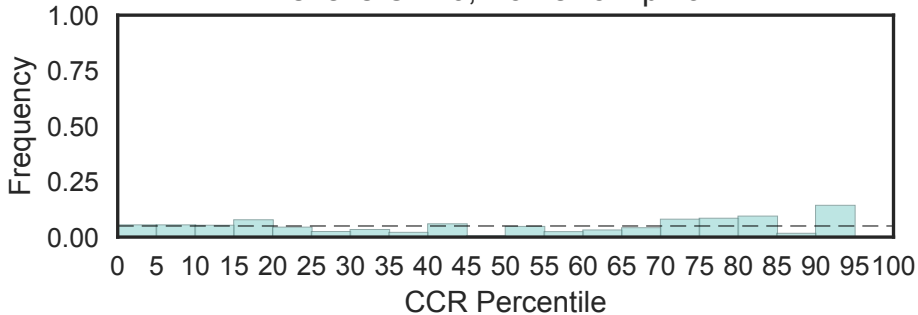

Plasma membrane calcium transporter ATPase C terminal  
(ATP\_Ca\_trans\_C, N=3)

Fisher's OR: 4.38; Bonferroni p-val: 1

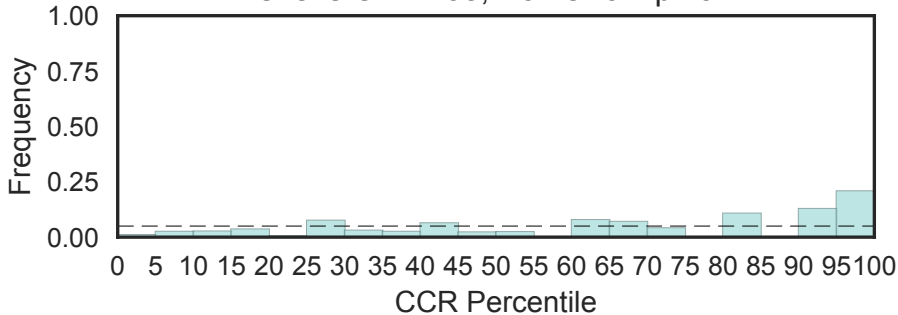

Conserved hypothetical ATP binding protein  
(ATP\_bind\_1, N=4)

Fisher's OR: 0.353; Bonferroni p-val: 1

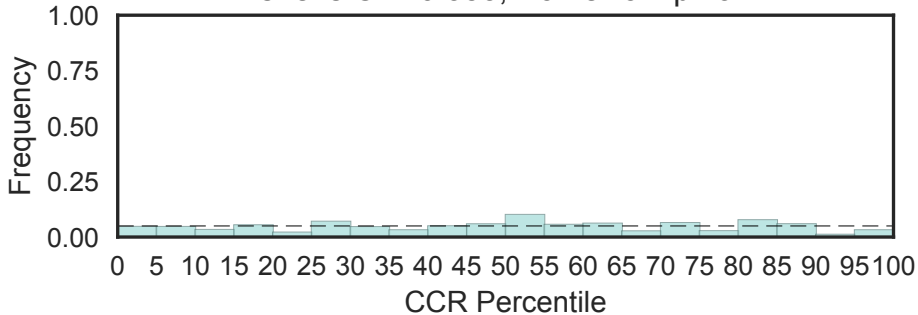

ATP synthase subunit H  
(ATP\_synt\_H, N=2)

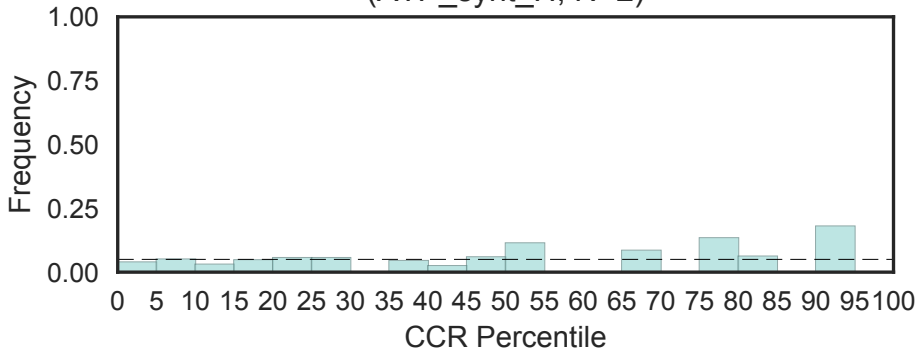



# ATP synthase regulation (ATP\_synth\_reg, N=1)

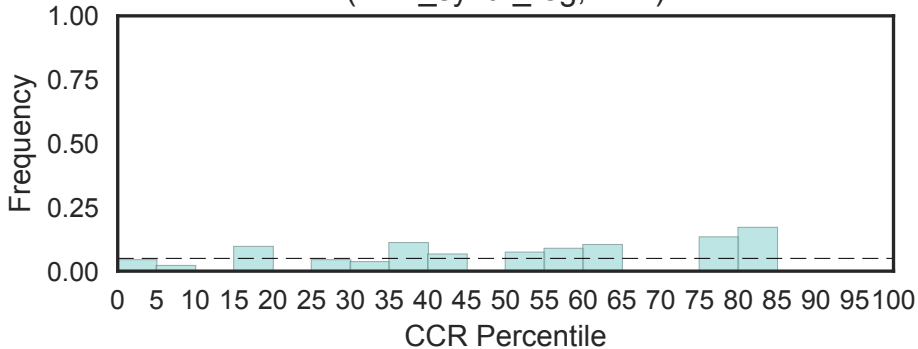

# KaiC

(ATPase, N=4)

Fisher's OR: 0; Bonferroni p-val: 1

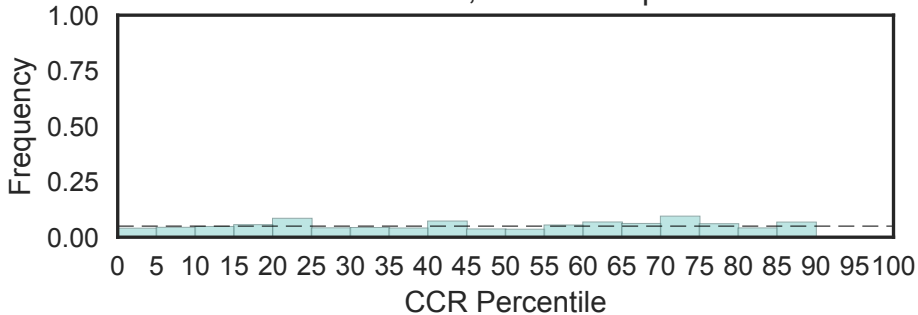

Capicua transcriptional repressor modulator  
(ATXN-1\_C, N=1)

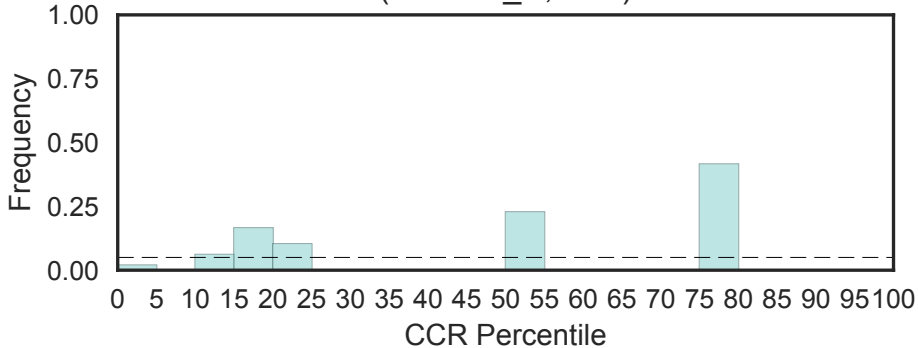

AT hook motif  
(AT\_hook, N=26)  
Fisher's OR: 1.42; Bonferroni p-val: 1

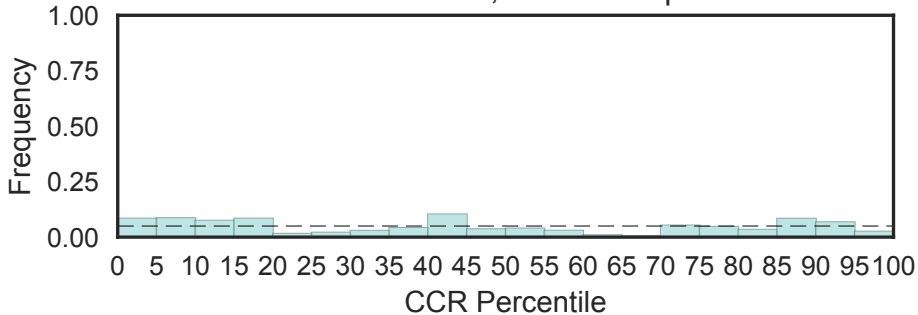

Acetyl xylan esterase (AXE1)  
(AXE1, N=2)

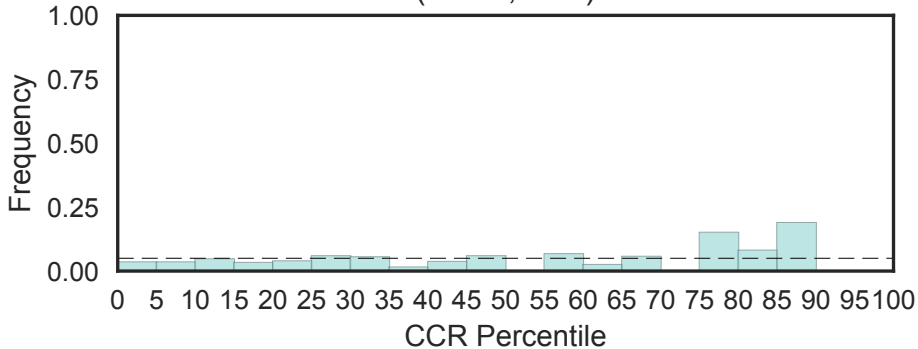

Ataxin-1 and HBP1 module (AXH)  
(AXH, N=3)

Fisher's OR: 3.33; Bonferroni p-val: 1

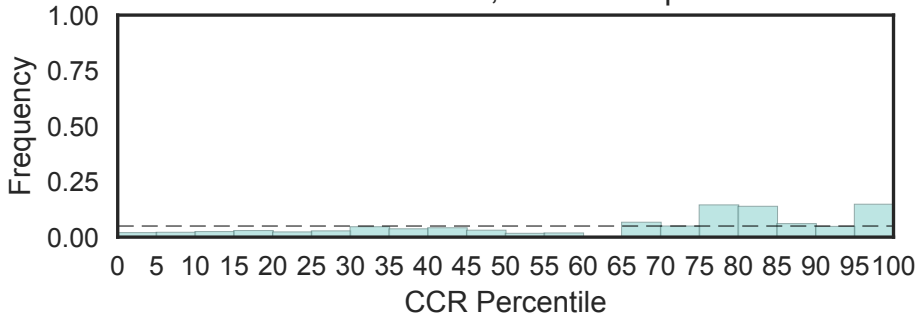

Axin-1 tankyrase binding domain  
(AXIN1\_TNKS\_BD, N=2)

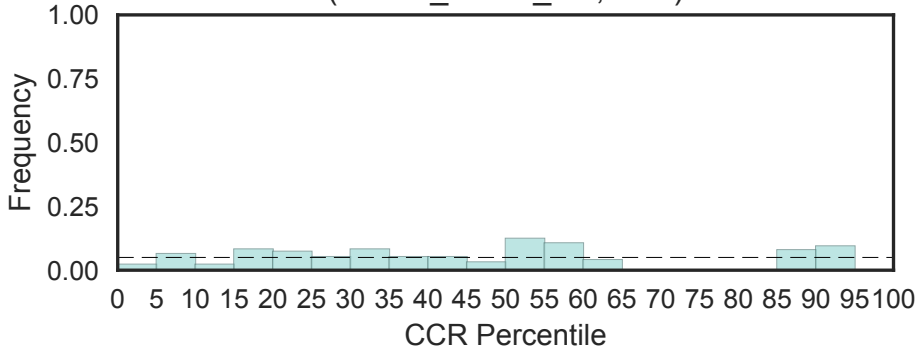

Amino-terminal Zinc-binding domain of ubiquitin ligase E3A  
(AZUL, N=1)

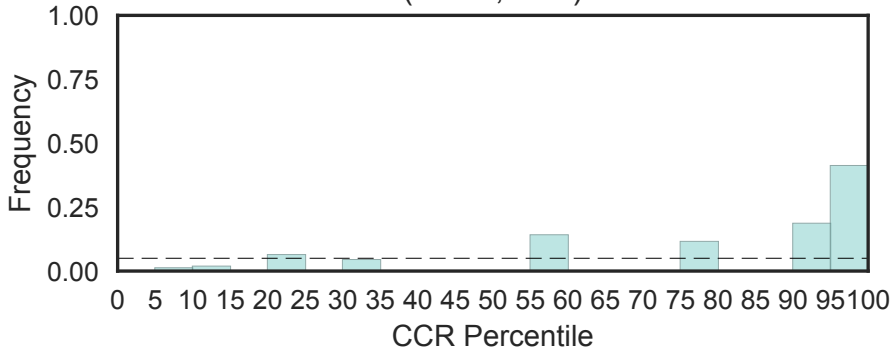



Adenosine-deaminase (editase) domain  
(A\_deamin, N=6)

Fisher's OR: 0.71; Bonferroni p-val: 1

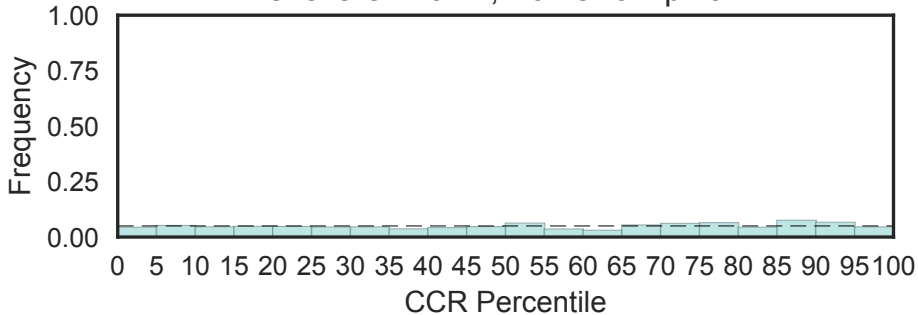

Adenosine/AMP deaminase  
(A\_deaminase, N=7)

Fisher's OR: 0.371; Bonferroni p-val: 1

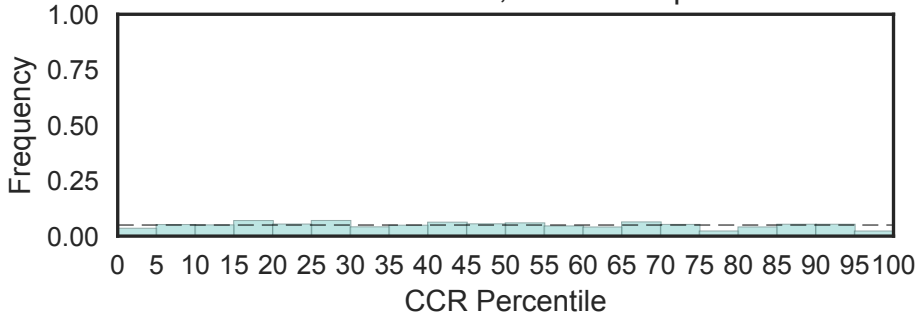

Adenosine/AMP deaminase N-terminal  
(A\_deaminase\_N, N=1)

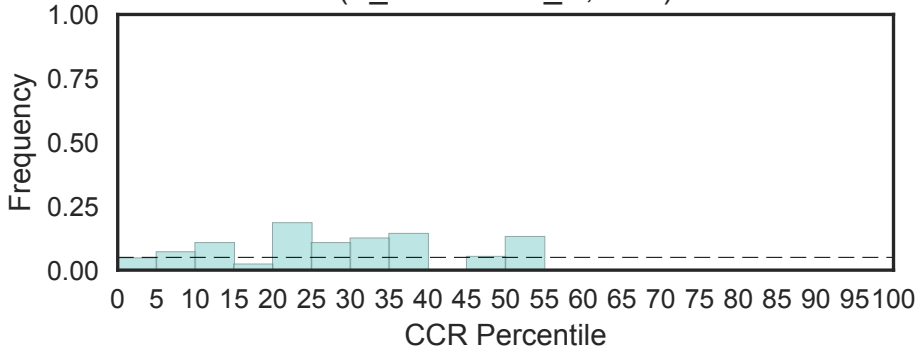

Transmembrane amino acid transporter protein  
(Aa\_trans, N=18)

Fisher's OR: 0.464; Bonferroni p-val: 1

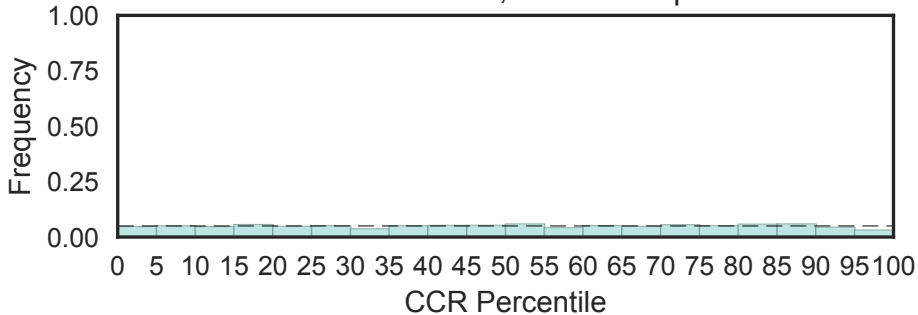

Putative adherens-junction anchoring region of AbLIM  
(AbLIM\_anchor, N=6)

Fisher's OR: 0.536; Bonferroni p-val: 1

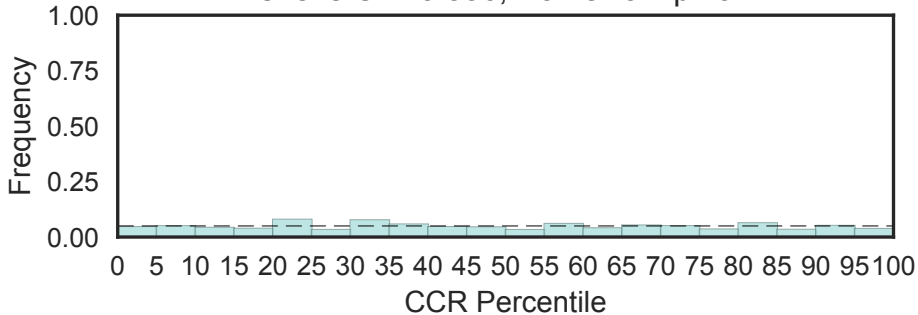

Alpha-L-arabinofuranosidase B (ABFB) domain  
(AbfB, N=2)

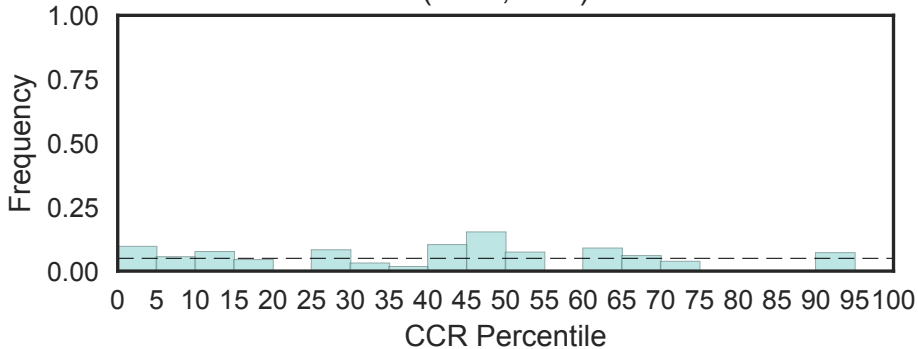

Partial alpha/beta-hydrolase lipase region  
(Abhydro\_lipase, N=10)

Fisher's OR: 0.118; Bonferroni p-val: 1

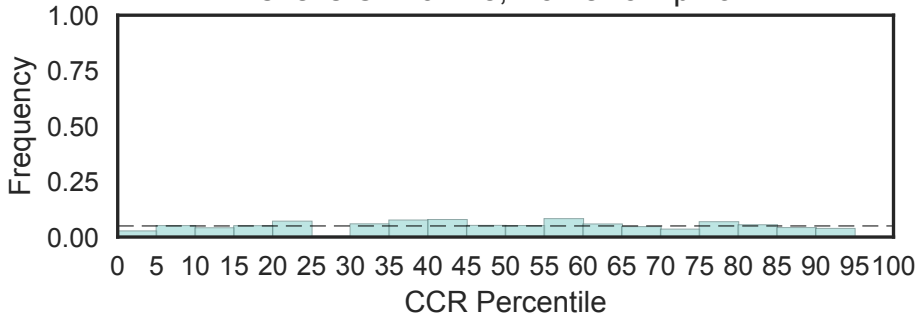

alpha/beta hydrolase fold  
(Abhydrolase\_1, N=38)

Fisher's OR: 0.417; Bonferroni p-val: 1

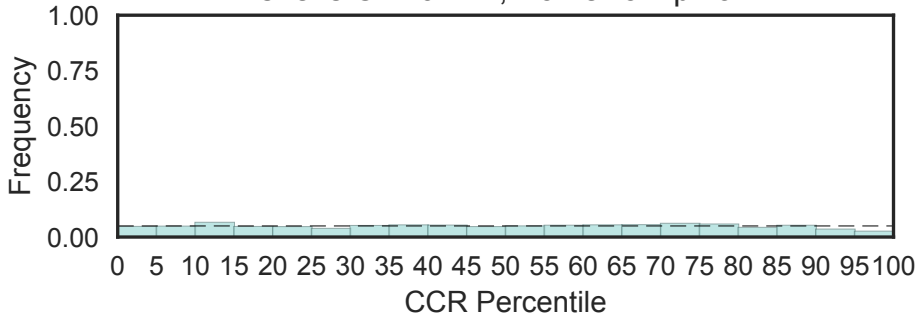



Phospholipase/Carboxylesterase  
(Abhydrolase\_2, N=4)

Fisher's OR: 0; Bonferroni p-val: 1

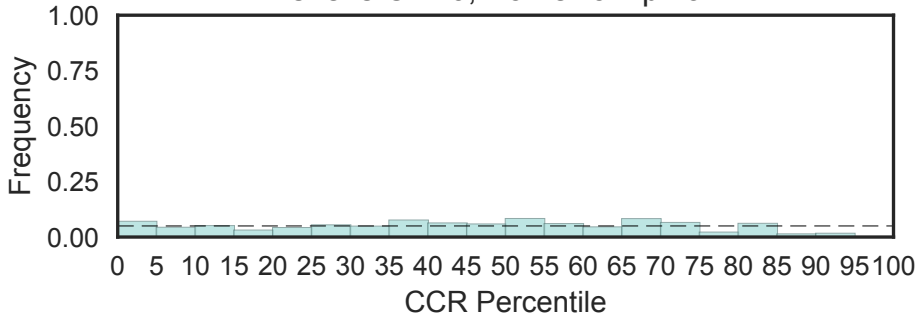

alpha/beta hydrolase fold  
(Abhydrolase\_3, N=25)

Fisher's OR: 1.01; Bonferroni p-val: 1

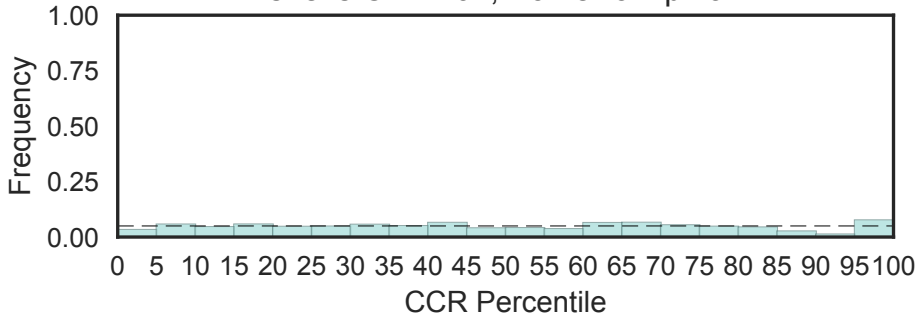

Alpha/beta hydrolase family  
(Abhydrolase\_6, N=26)

Fisher's OR: 0.495; Bonferroni p-val: 1

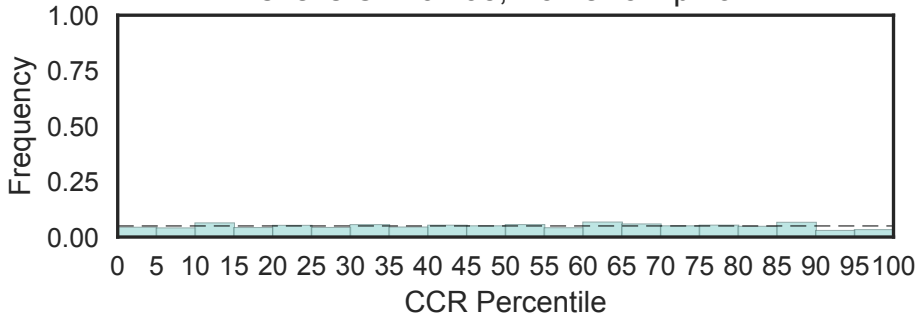

# CAAX protease self-immunity (Abi, N=1)

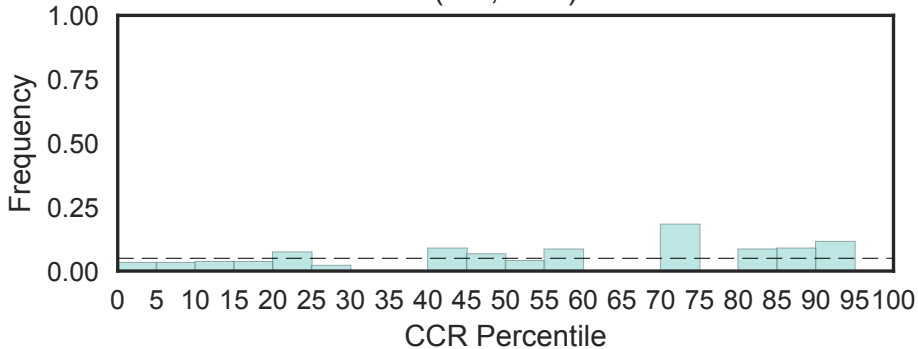

Abl-interactor HHR  
(Abi\_HHR, N=3)

Fisher's OR: 1.3; Bonferroni p-val: 1

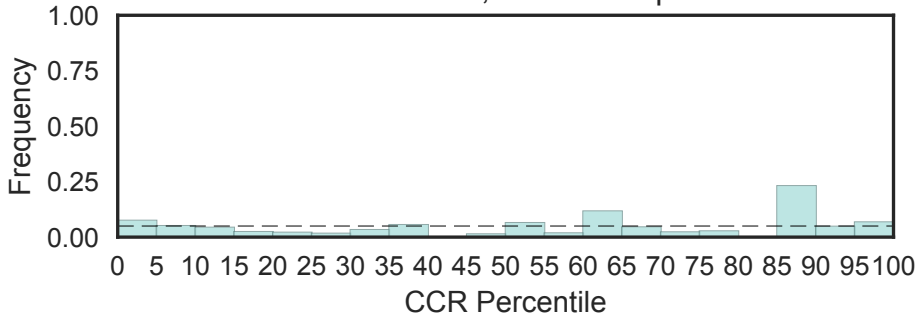

Acetyl-coenzyme A transporter 1  
(Acatn, N=3)

Fisher's OR: 1.74; Bonferroni p-val: 1

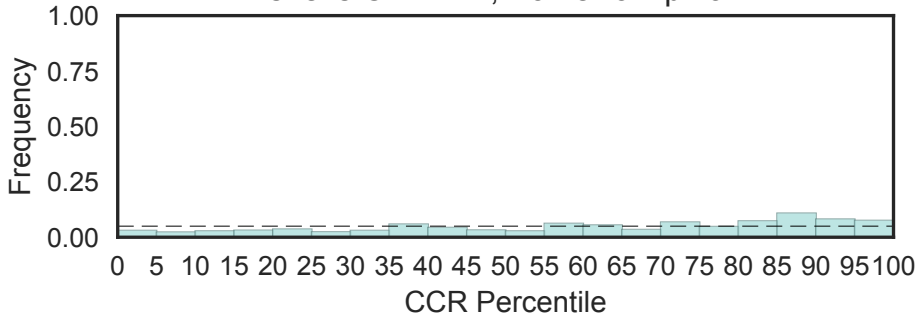

Acetyltransferase (GNAT) family  
(Acetyltransf\_1, N=18)  
Fisher's OR: 1.57; Bonferroni p-val: 1

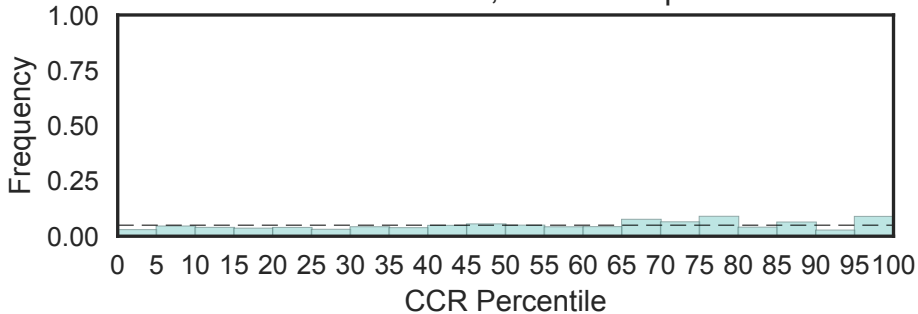

Acetyltransferase (GNAT) domain  
(Acetyltransf\_10, N=14)  
Fisher's OR: 3.15; Bonferroni p-val: 1

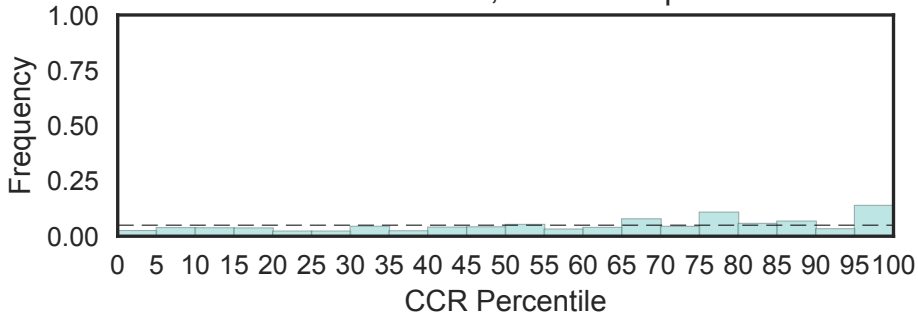



ESCO1/2 acetyl-transferase  
(Acetyltransf\_13, N=2)

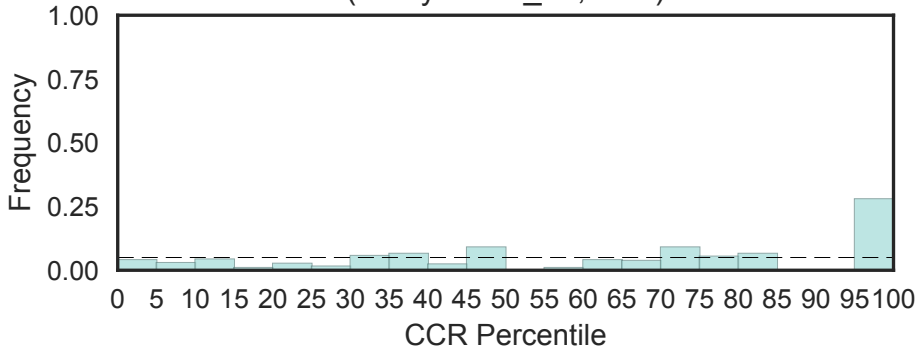

N-acetyltransferase  
(Acetyltransf\_2, N=2)

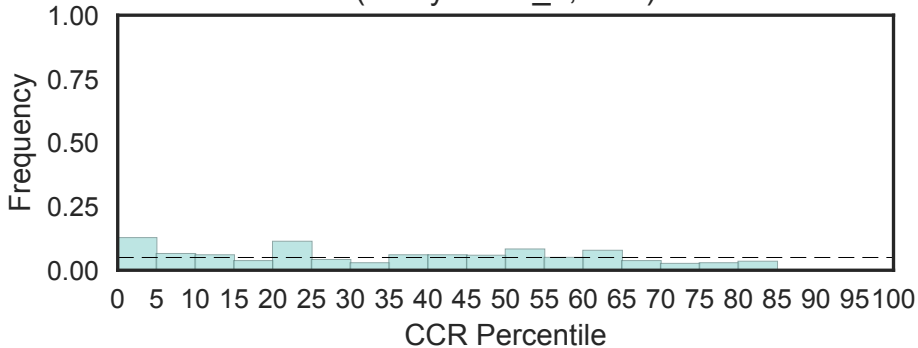

Acetyltransferase (GNAT) domain  
(Acetyltransf\_3, N=2)

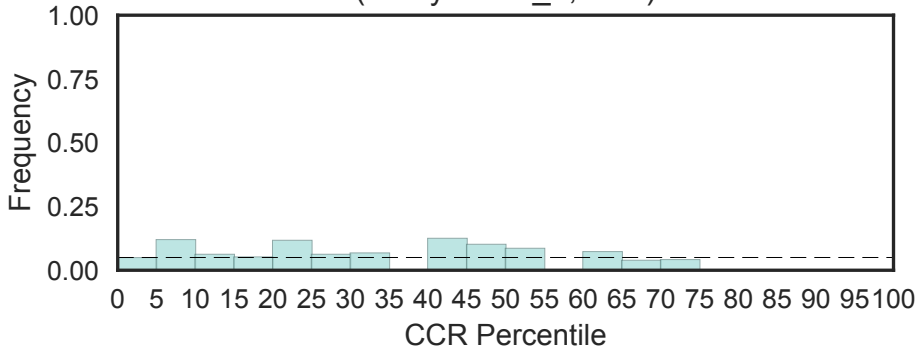

Acetyltransferase (GNAT) domain  
(Acetyltransf\_4, N=2)

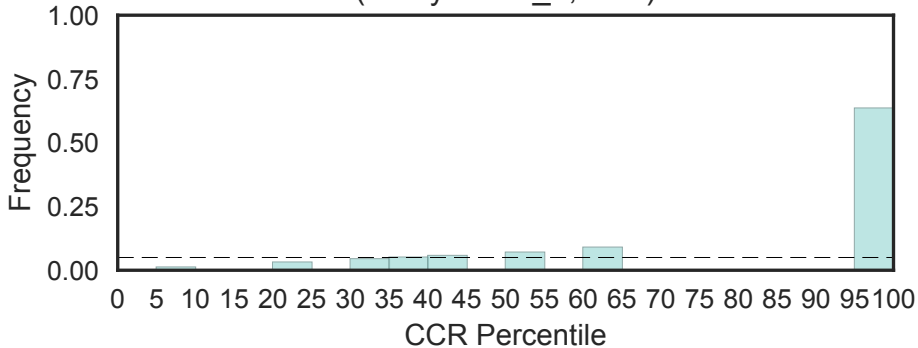

Acetyltransferase (GNAT) domain  
(Acetyltransf\_7, N=11)  
Fisher's OR: 2.22; Bonferroni p-val: 1

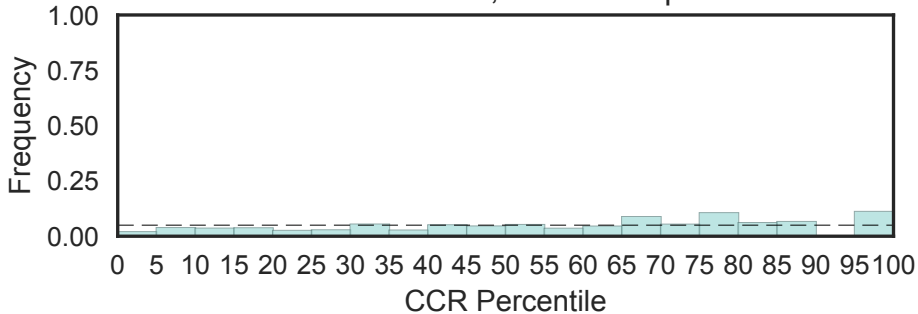

GCN5-related N-acetyl-transferase  
(Acetyltransf\_CG, N=2)

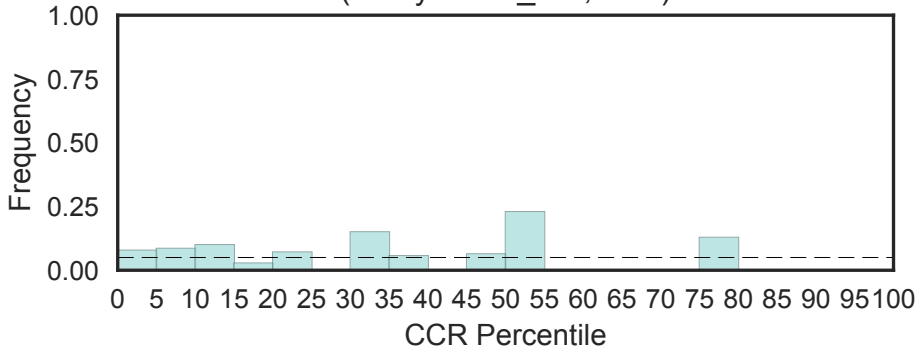

# Acid Phosphatase (Acid\_PPase, N=2)

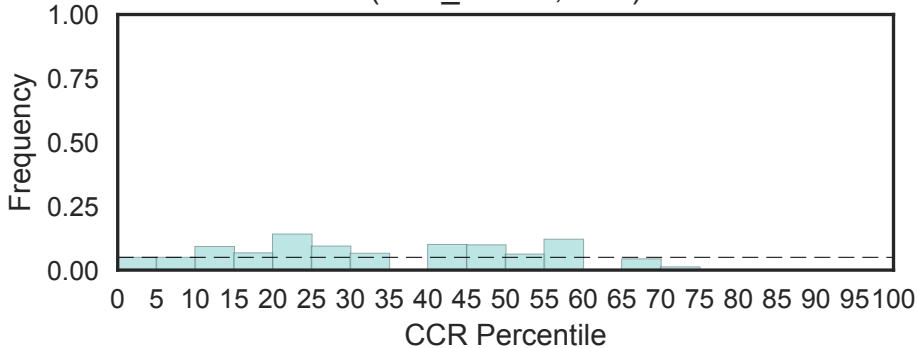

Aconitase family (aconitate hydratase)  
(Aconitase, N=4)

Fisher's OR: 0.922; Bonferroni p-val: 1

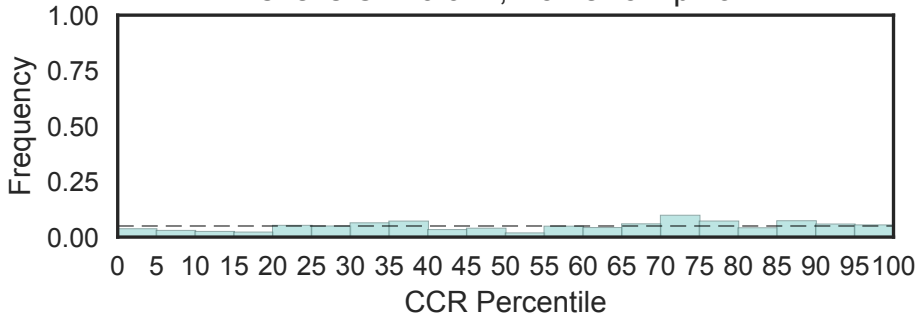



Aconitase C-terminal domain  
(Aconitase\_C, N=3)

Fisher's OR: 0.772; Bonferroni p-val: 1

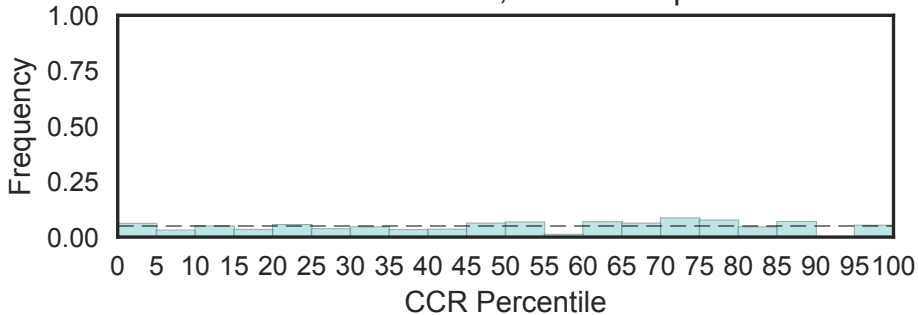

# Actin

(Actin, N=34)

Fisher's OR: 2.07; Bonferroni p-val: 0.0359

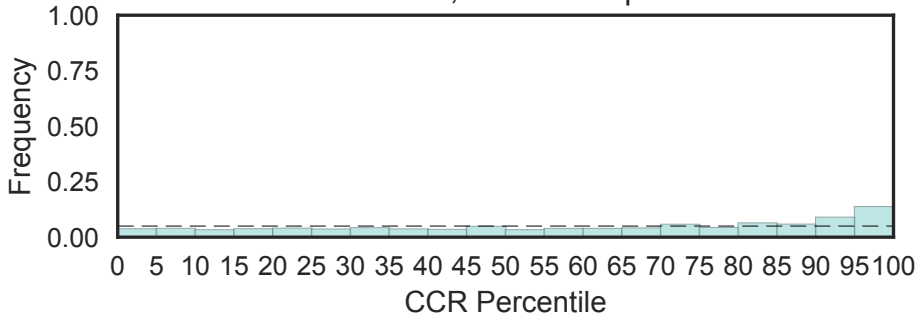

Putative actin-like family  
(Actin\_micro, N=1)

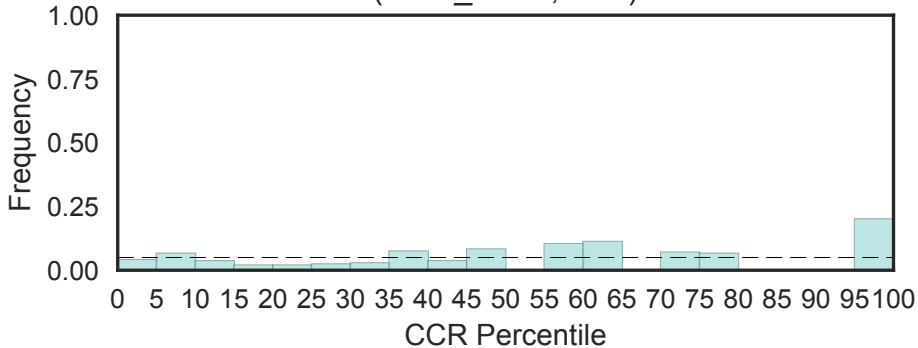

Activin types I and II receptor domain  
(Activin\_recp, N=10)

Fisher's OR: 1.26; Bonferroni p-val: 1

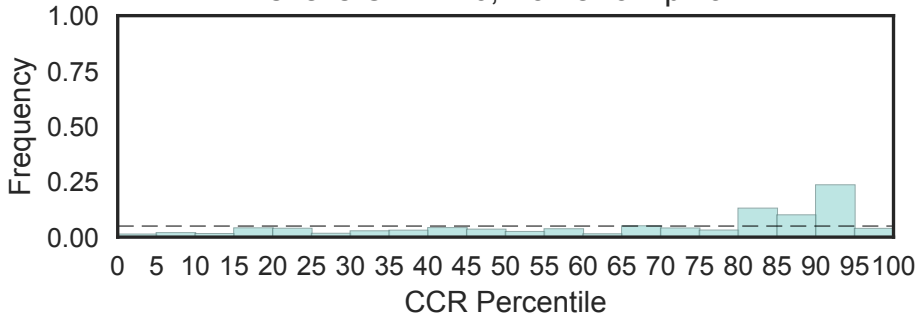

Acyl-CoA dehydrogenase, C-terminal domain  
(Acyl-CoA\_dh\_1, N=15)

Fisher's OR: 0; Bonferroni p-val: 1

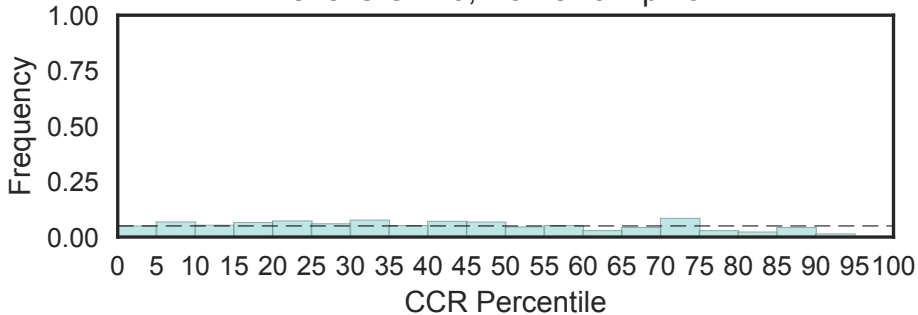

Acyl-CoA dehydrogenase, C-terminal domain  
(Acyl-CoA\_dh\_2, N=13)

Fisher's OR: 0; Bonferroni p-val: 1

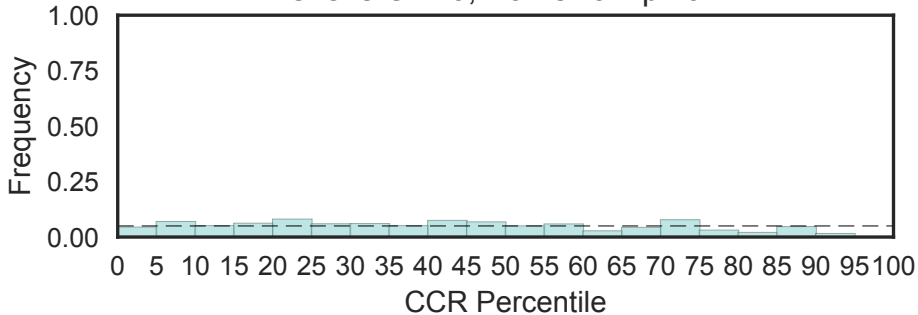

Acyl-CoA dehydrogenase, middle domain  
(Acyl-CoA\_dh\_M, N=16)

Fisher's OR: 0; Bonferroni p-val: 1

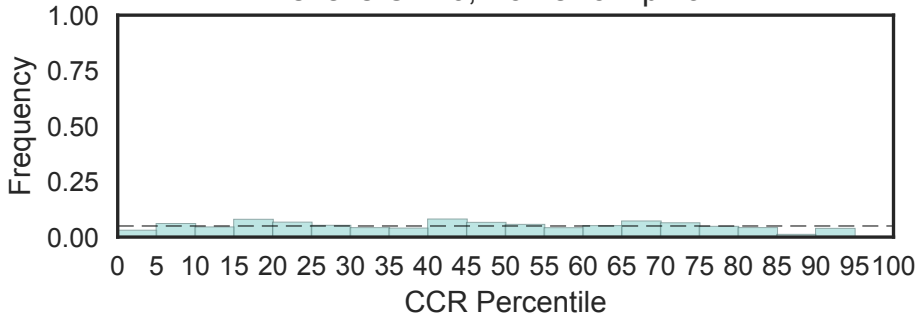

Acyl-CoA dehydrogenase, N-terminal domain  
(Acyl-CoA\_dh\_N, N=11)

Fisher's OR: 0.193; Bonferroni p-val: 1

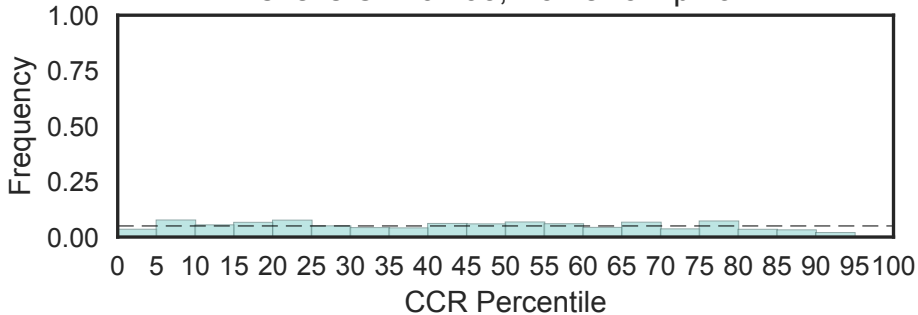



Acyl-coenzyme A oxidase N-terminal  
(Acyl-CoA\_ox\_N, N=2)

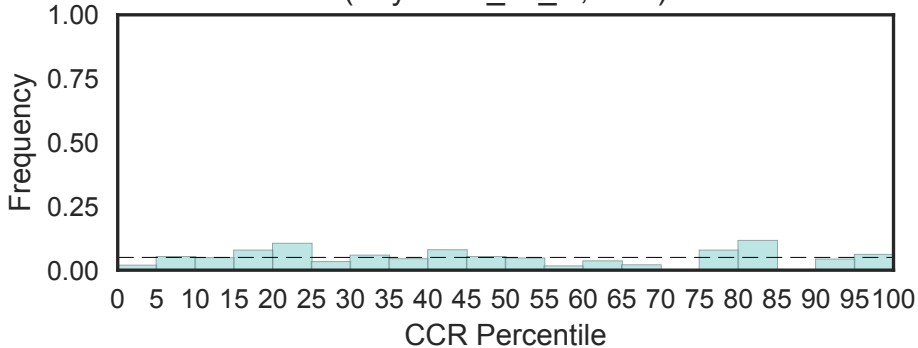

# Acyl-CoA thioesterase

(Acyl\_CoA\_thio, N=3)

Fisher's OR: 0; Bonferroni p-val: 1

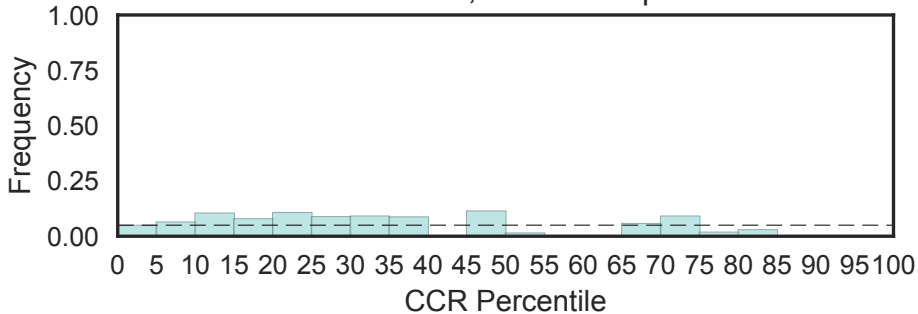

Acyl transferase domain  
(Acyl\_transf\_1, N=2)

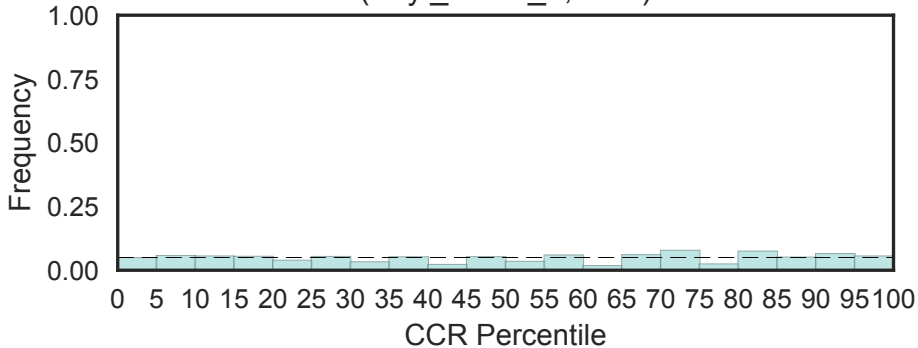

Acylphosphatase  
(Acylphosphatase, N=3)  
Fisher's OR: 0.349; Bonferroni p-val: 1

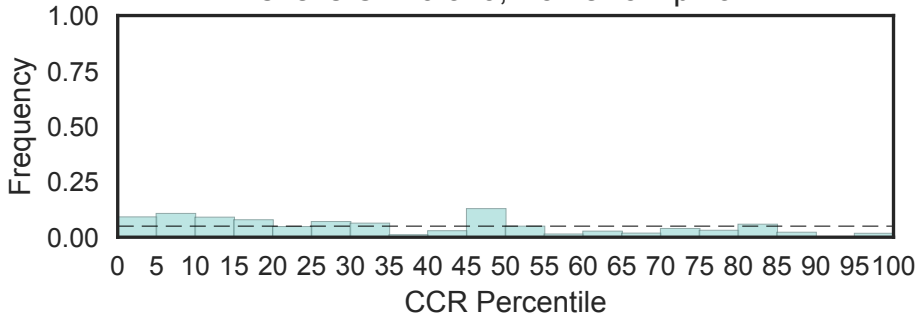

# Acyltransferase C-terminus

(Acyltransf\_C, N=5)

Fisher's OR: 0; Bonferroni p-val: 1

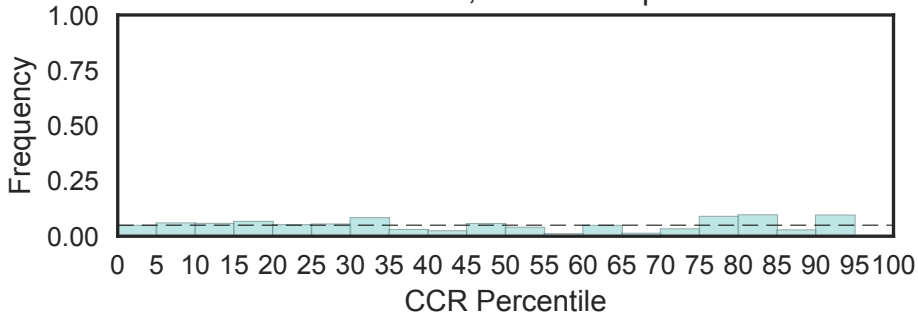

Acyltransferase  
(Acyltransferase, N=15)  
Fisher's OR: 1.33; Bonferroni p-val: 1

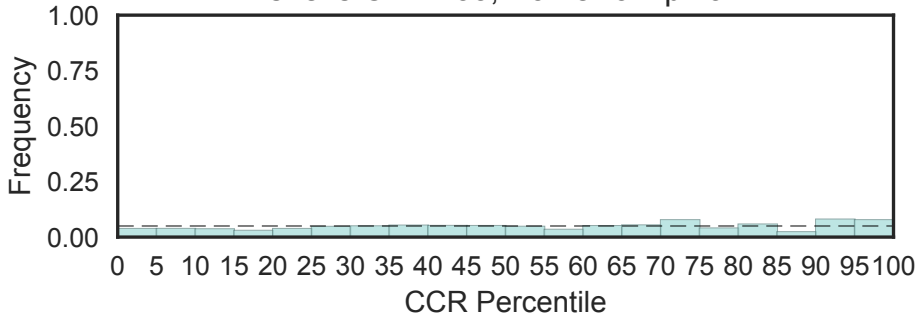

# Histone acetyltransferases subunit 3 (Ada3, N=2)

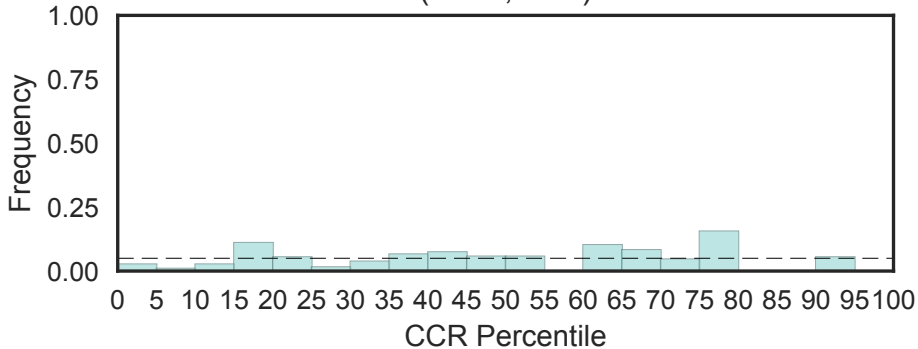

Adaptor complexes medium subunit family  
(Adap\_comp\_sub, N=11)

Fisher's OR: 1.06; Bonferroni p-val: 1

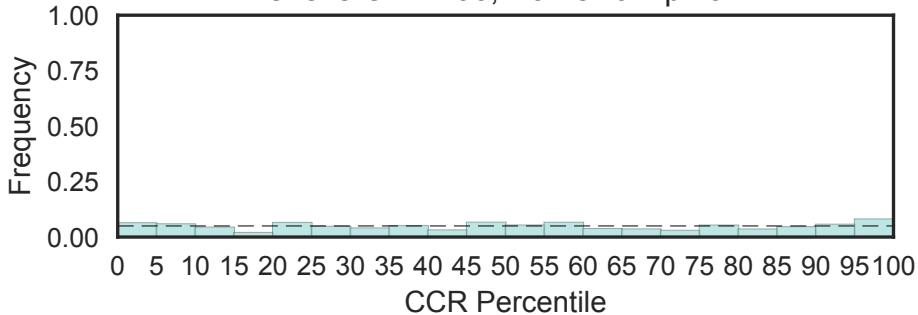



Adaptin N terminal region  
(Adaptin\_N, N=16)

Fisher's OR: 2.42; Bonferroni p-val: 0.000343

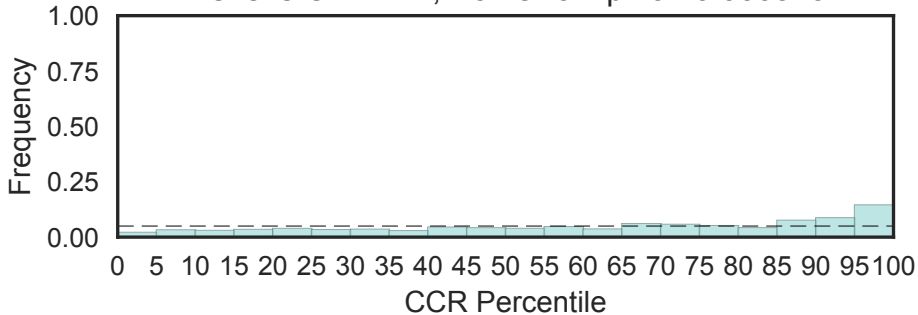

Alpha and gamma adaptin binding protein p34  
(Adaptin\_binding, N=1)

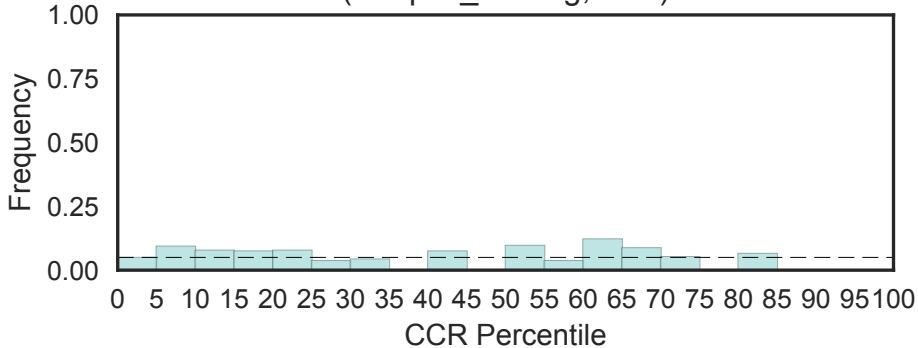

Adenylate sensor of SNF1-like protein kinase  
(AdenylateSensor, N=2)

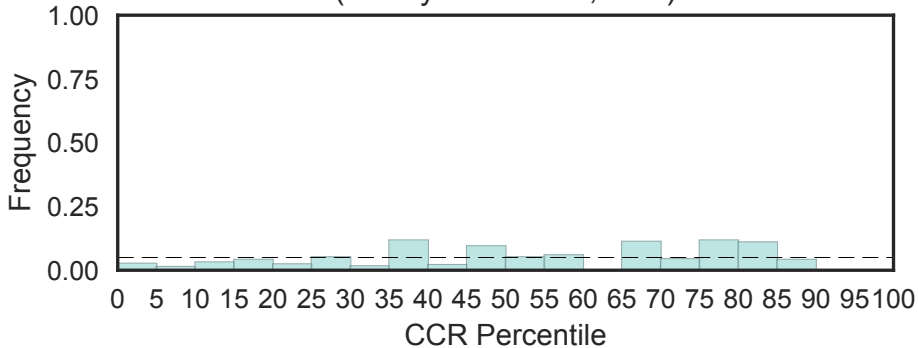

Adenylosuccinate synthetase  
(Adenylsucc\_synt, N=2)

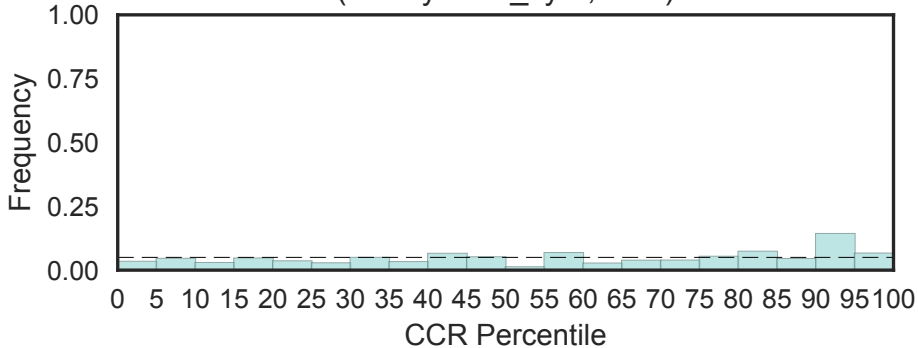

Adhesion molecule, immunoglobulin-like  
(Adhes-Ig\_like, N=1)

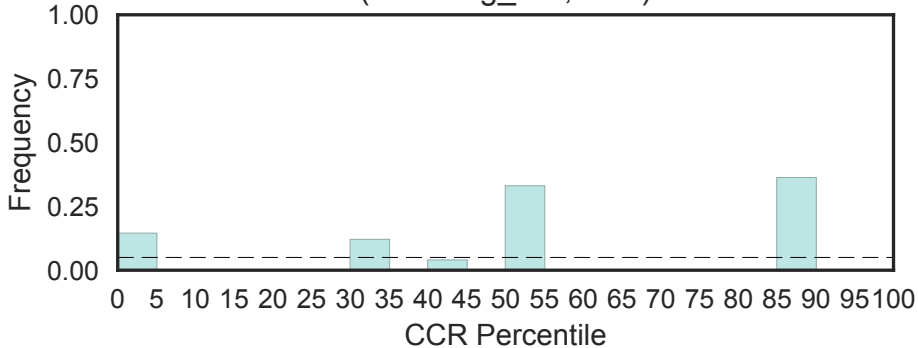

# Adipogenin (Adipogenin, N=1)

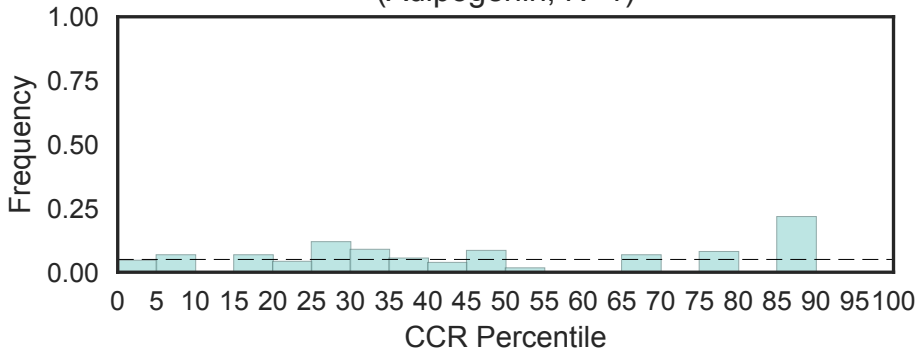

S-adenosyl-L-homocysteine hydrolase  
(AdoHcyase, N=4)

Fisher's OR: 4.52; Bonferroni p-val: 0.0759

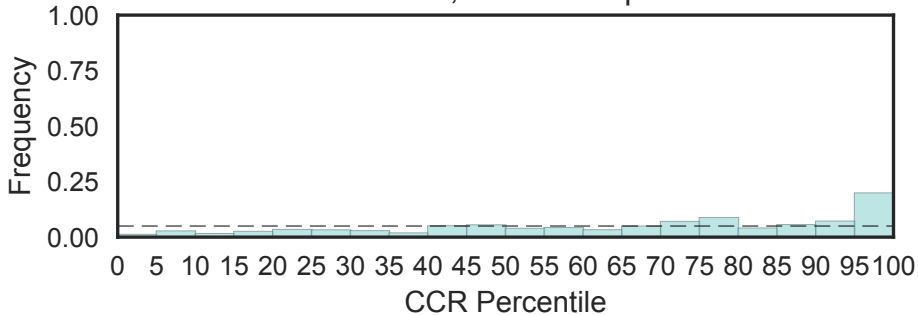

S-adenosyl-L-homocysteine hydrolase, NAD binding domain  
(AdoHcyase\_NAD, N=3)

Fisher's OR: 2.27; Bonferroni p-val: 1

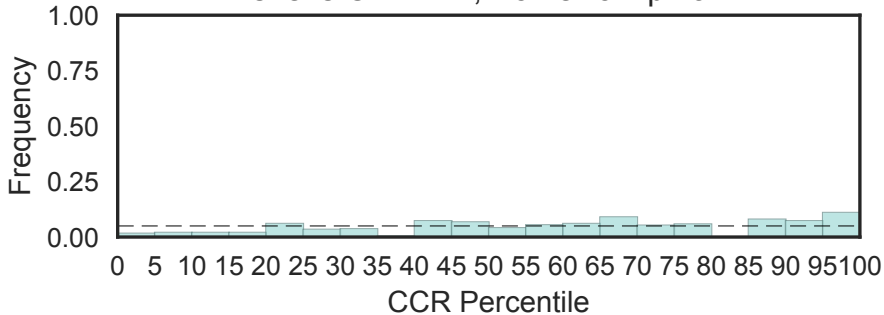



Predicted AdoMet-dependent methyltransferase  
(AdoMet\_MTase, N=1)

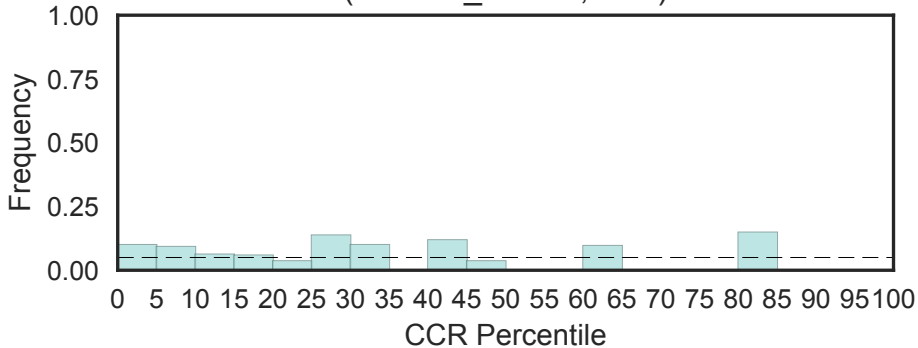

Acrosome formation-associated factor  
(Afaf, N=1)

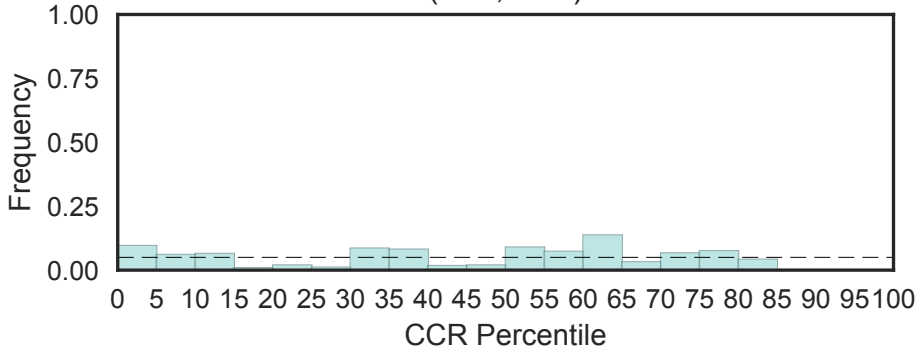

Docking domain of Afi1 for Arf3 in vesicle trafficking  
(Afi1, N=1)

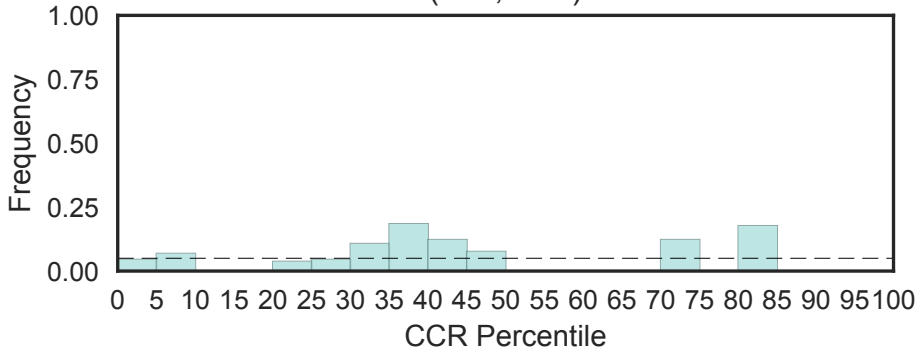

Agenet domain  
(Agenet, N=3)

Fisher's OR: 5.41; Bonferroni p-val: 1

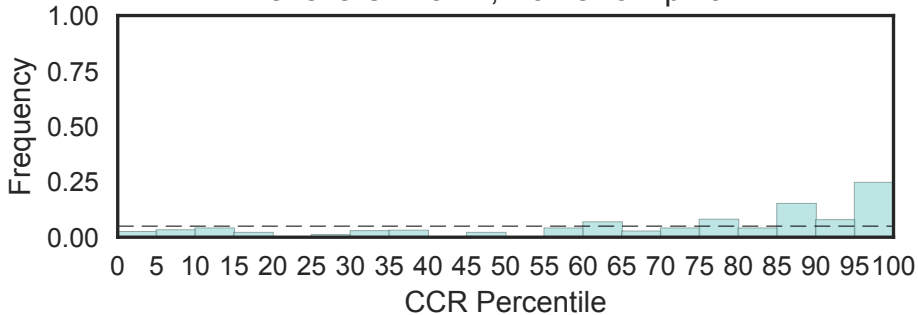

Argonaute hook  
(Ago\_hook, N=3)

Fisher's OR: 0.974; Bonferroni p-val: 1

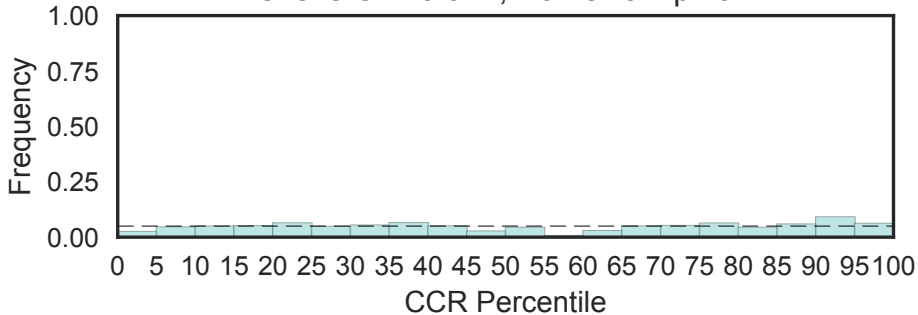

Agouti protein  
(Agouti, N=2)

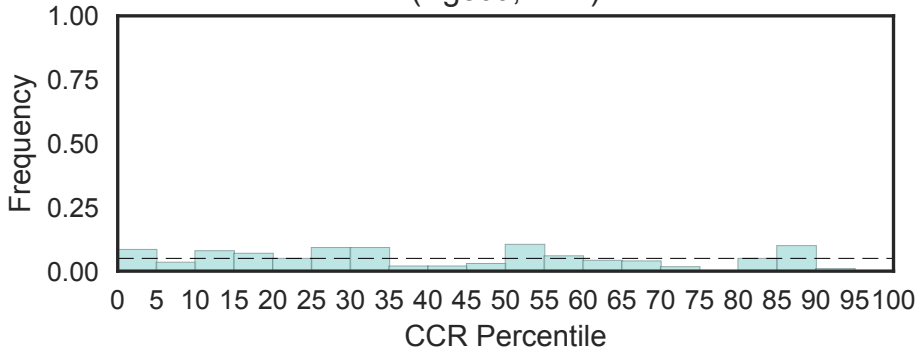

Activator of Hsp90 ATPase, N-terminal  
(Aha1\_N, N=1)

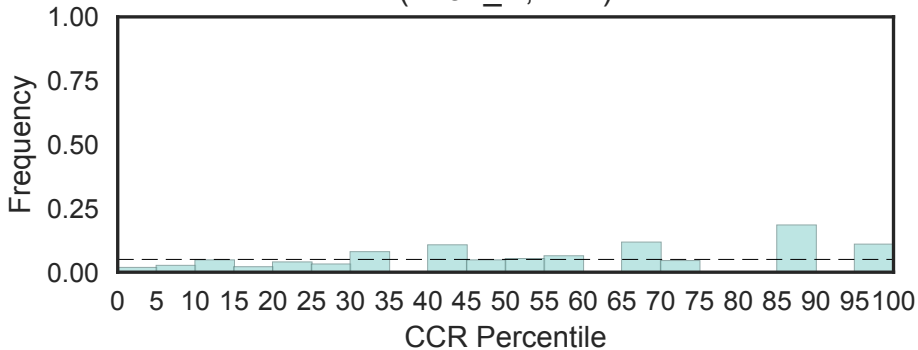

AhpC/TSA family  
(AhpC-TSA, N=12)

Fisher's OR: 0.214; Bonferroni p-val: 1

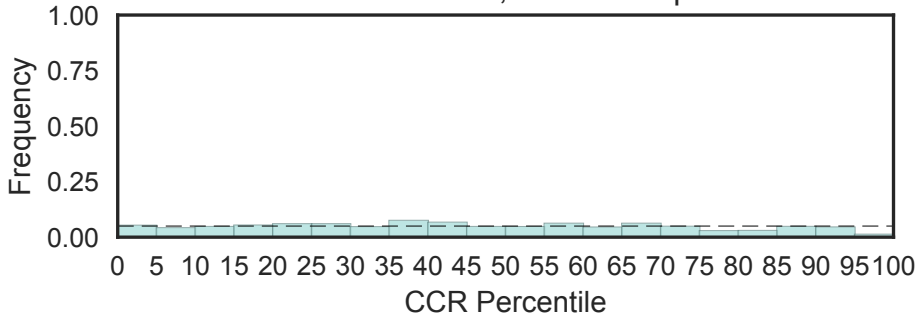



AhpC/TSA antioxidant enzyme  
(AhpC-TSA\_2, N=3)

Fisher's OR: 0; Bonferroni p-val: 1

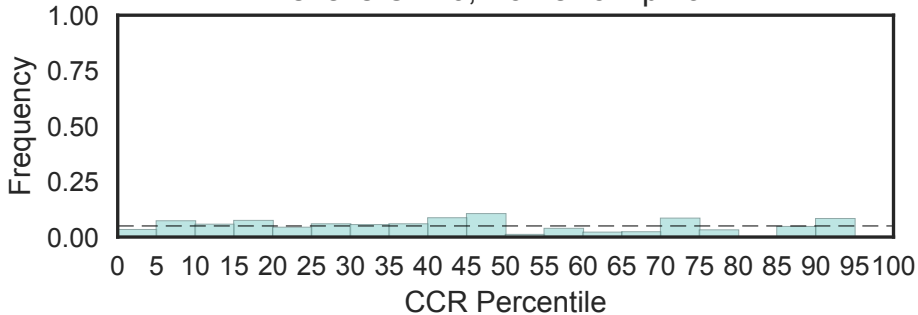

Cytoskeletal adhesion  
(Aida\_C2, N=1)

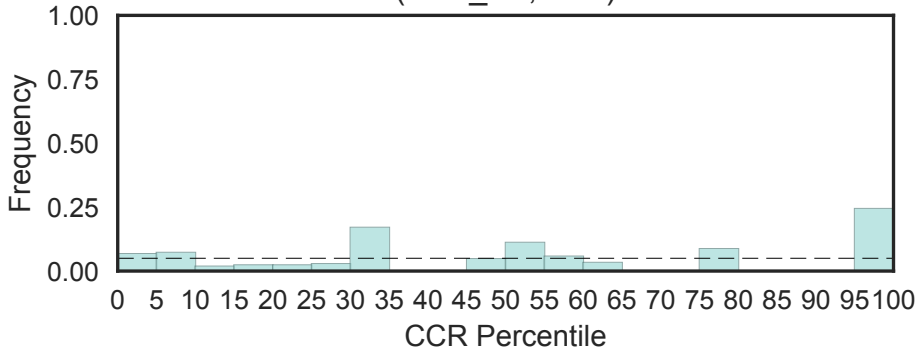

Aida N-terminus  
(Aida\_N, N=1)

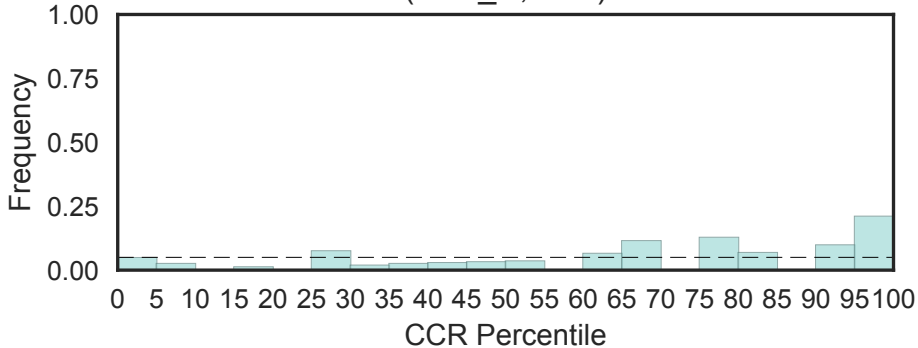

Alanine dehydrogenase/PNT, C-terminal domain  
(AlaDh\_PNT\_C, N=2)

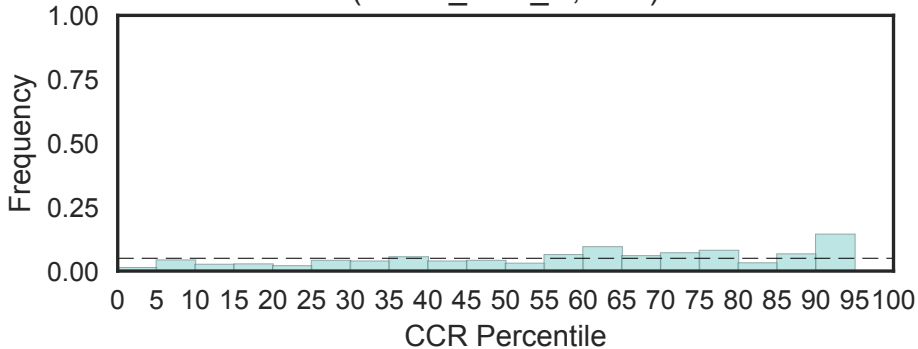

Alanine dehydrogenase/PNT, N-terminal domain  
(AlaDh\_PNT\_N, N=2)

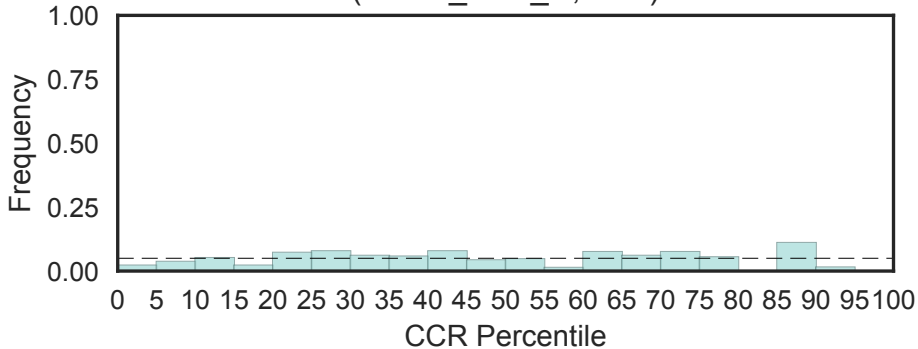

Alanine racemase, N-terminal domain  
(Ala\_racemase\_N, N=1)

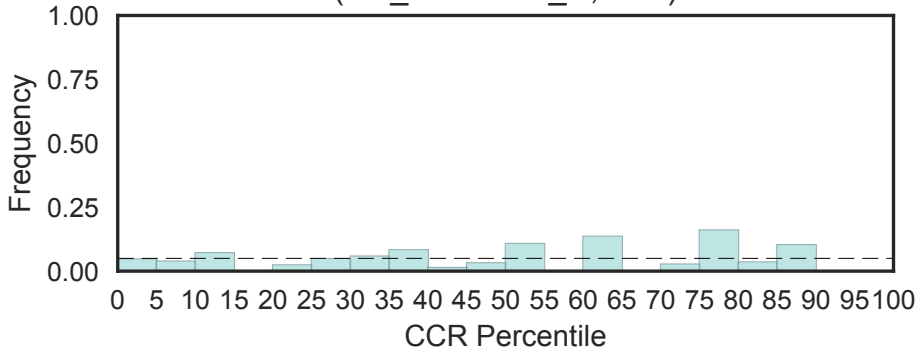

Putative DNA-binding domain  
(AlbA\_2, N=7)

Fisher's OR: 0; Bonferroni p-val: 1

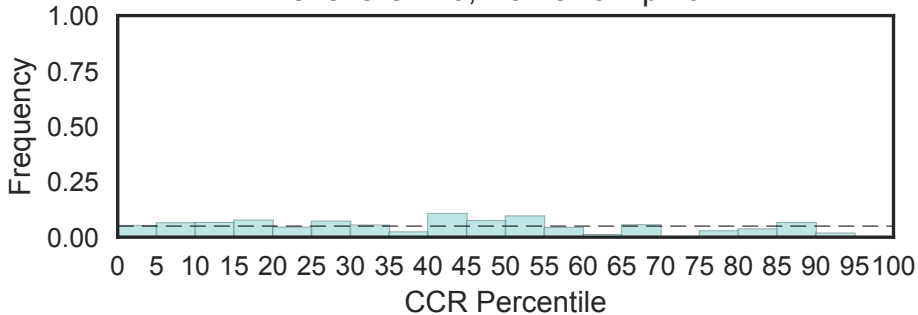

Alba  
(Alba, N=3)

Fisher's OR: 0; Bonferroni p-val: 1

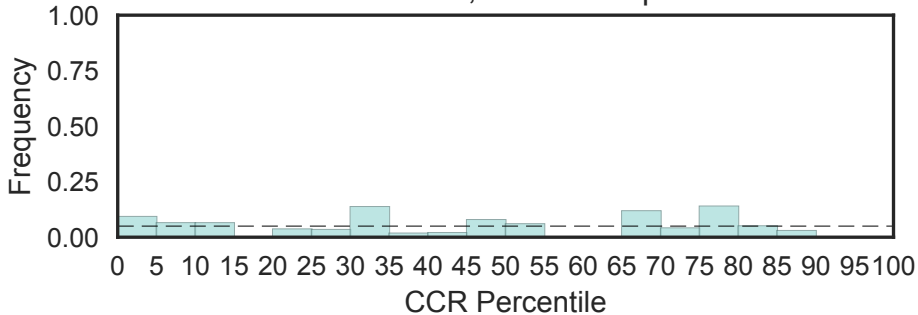



Aldehyde oxidase and xanthine dehydrogenase, a/b hammerhead domain  
(Ald\_Xan\_dh\_C, N=2)

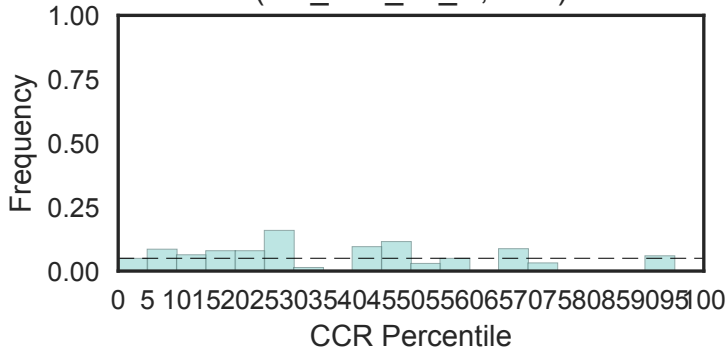

Molybdopterin-binding domain of aldehyde dehydrogenase  
(Ald\_Xan\_dh\_C2, N=2)

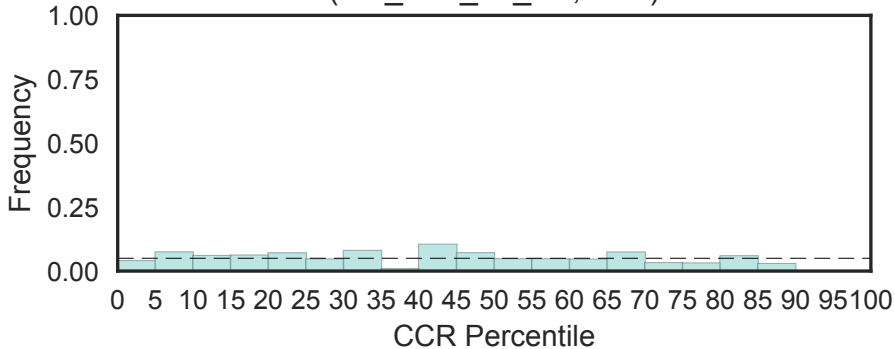

Aldehyde dehydrogenase family  
(Aldedh, N=22)

Fisher's OR: 0.194; Bonferroni p-val: 0.00086

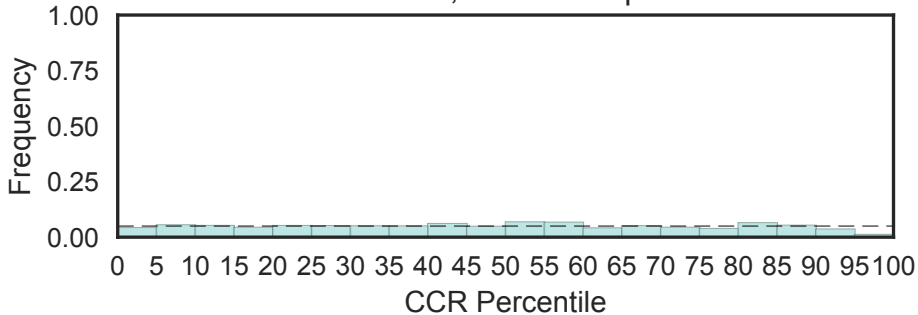

# Aldo/keto reductase family

(Aldo\_ket\_red, N=20)

Fisher's OR: 0.419; Bonferroni p-val: 1

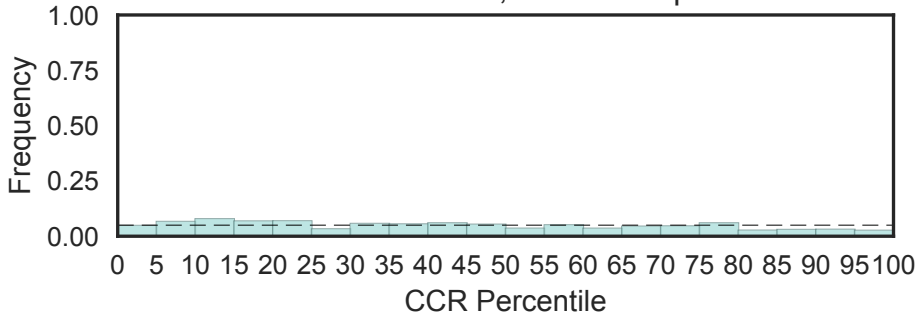

Class II Aldolase and Adducin N-terminal domain  
(Aldolase\_II, N=4)

Fisher's OR: 0.848; Bonferroni p-val: 1

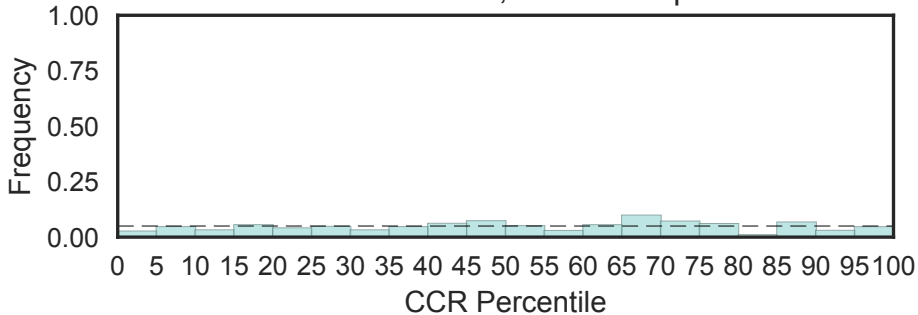

Aldose 1-epimerase  
(Aldose\_epim, N=1)

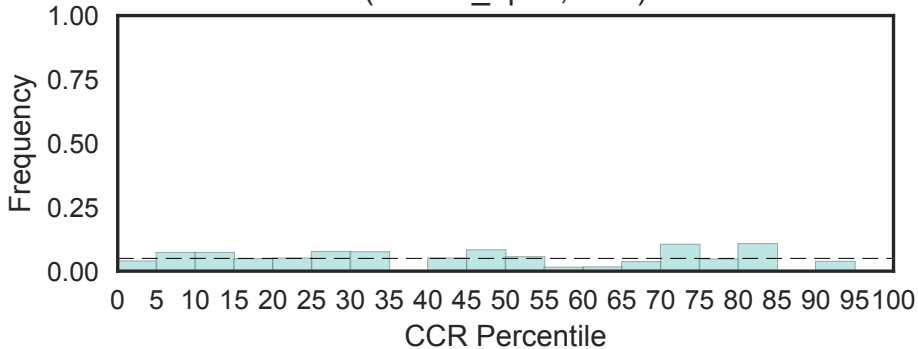

Oligosaccharide biosynthesis protein Alg14 like  
(Alg14, N=1)

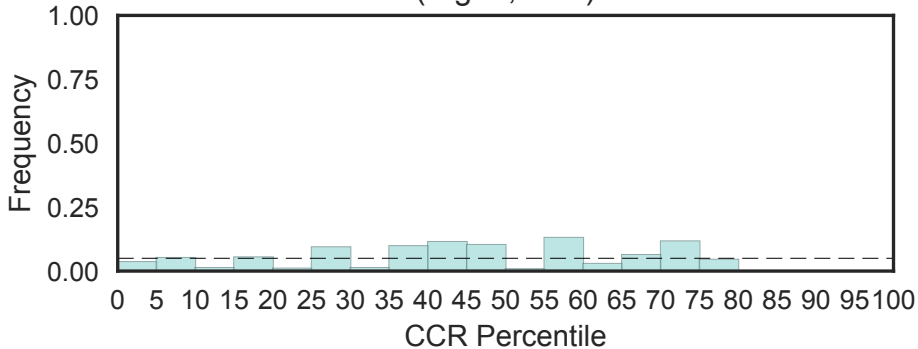

ALG6, ALG8 glycosyltransferase family  
(Alg6\_Alg8, N=2)

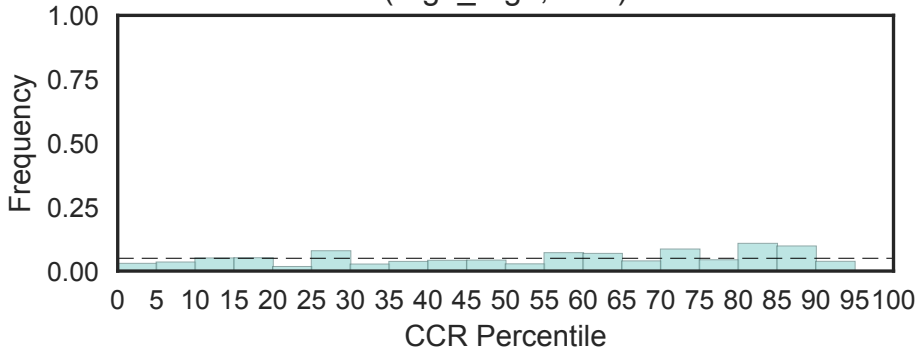



Alkaline phosphatase  
(Alk\_phosphatase, N=4)  
Fisher's OR: 0; Bonferroni p-val: 1

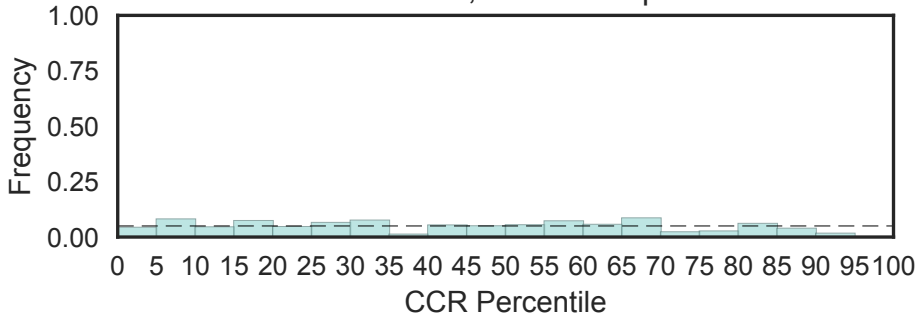

Alkyl sulfatase C-terminal  
(Alkyl\_sulf\_C, N=1)

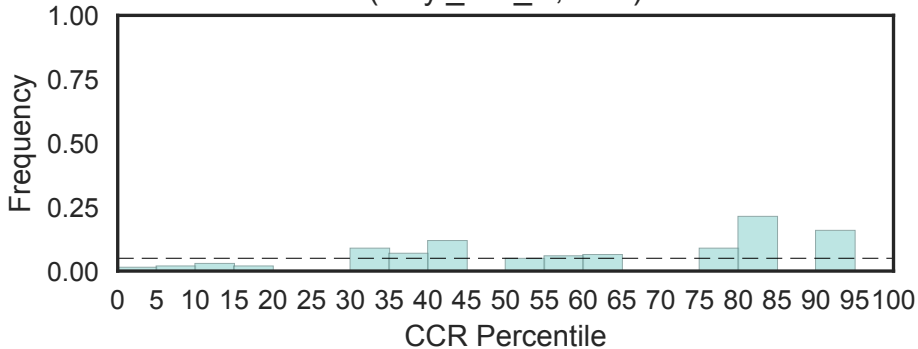

Allantoicase repeat  
(Allantoicase, N=2)

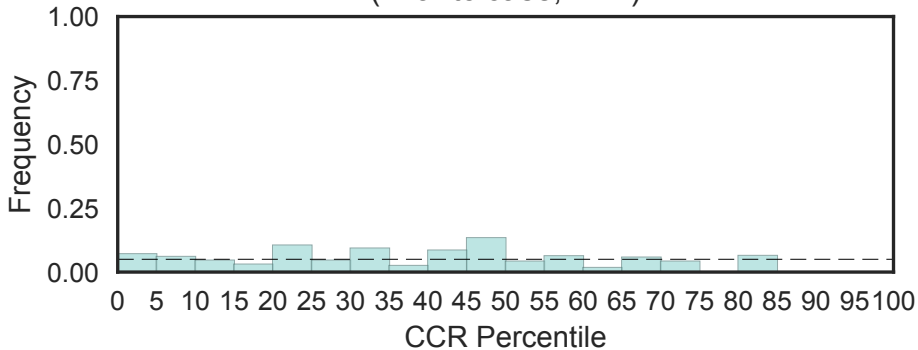

Alpha-2-macroglobulin RAP, C-terminal domain  
(Alpha-2-MRAP\_C, N=1)

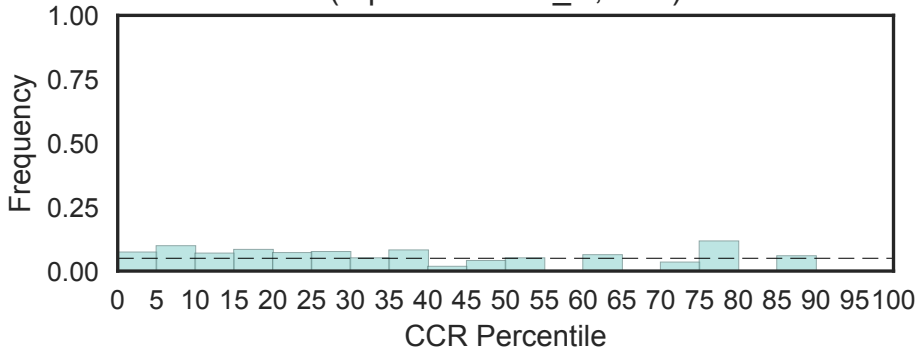

Alpha-2-macroglobulin RAP, N-terminal domain  
(Alpha-2-MRAP\_N, N=1)

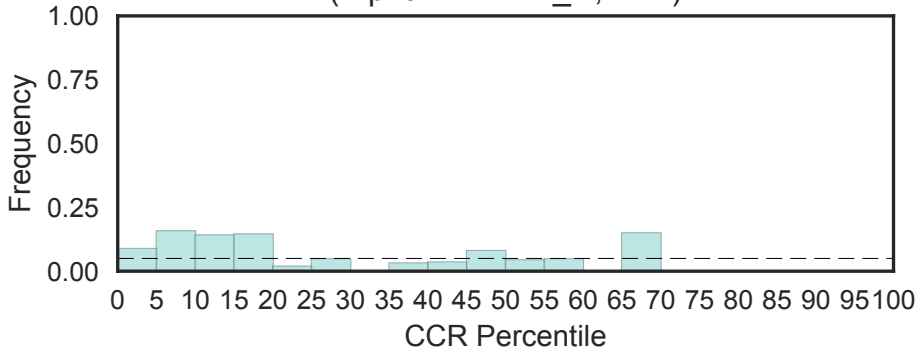

Alpha amylase, catalytic domain  
(Alpha-amylase, N=9)

Fisher's OR: 0; Bonferroni p-val: 1

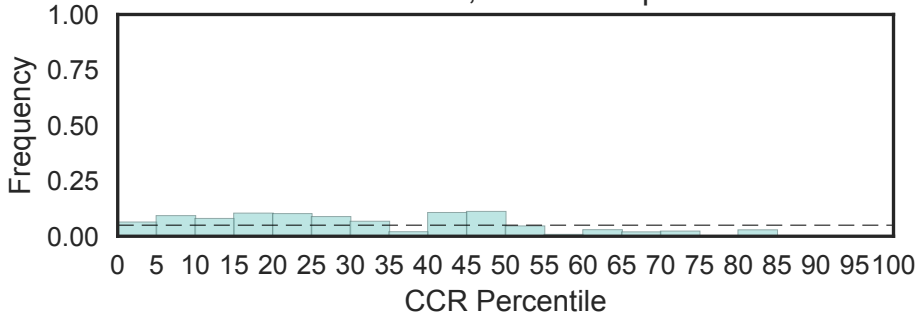

Alpha amylase, C-terminal all-beta domain  
(Alpha-amylase\_C, N=6)

Fisher's OR: 0; Bonferroni p-val: 1

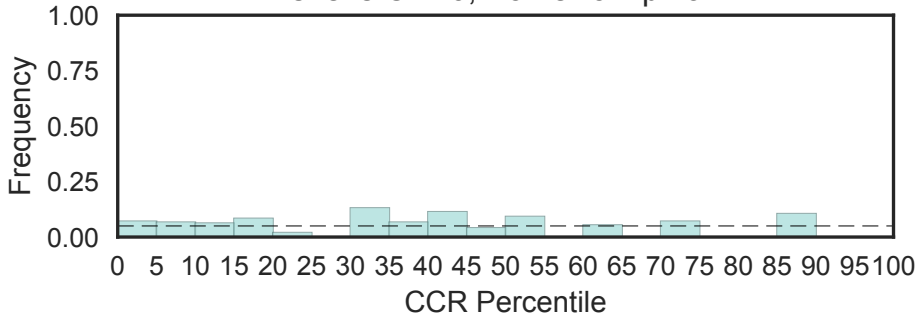

Alpha mannosidase middle domain  
(Alpha-mann\_mid, N=5)  
Fisher's OR: 0.575; Bonferroni p-val: 1

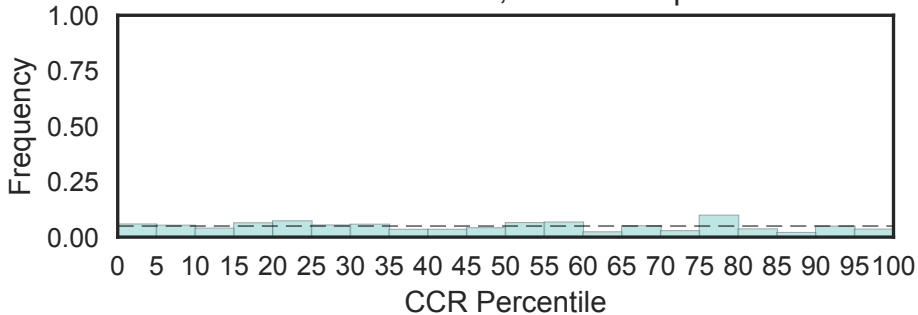



Alpha-L-fucosidase  
(Alpha\_L\_fucos, N=2)

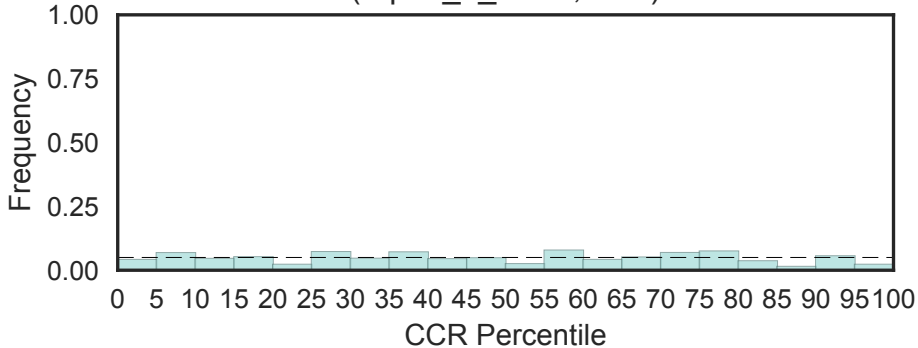

Adaptin C-terminal domain  
(Alpha\_adaptinC2, N=9)

Fisher's OR: 1.56; Bonferroni p-val: 1

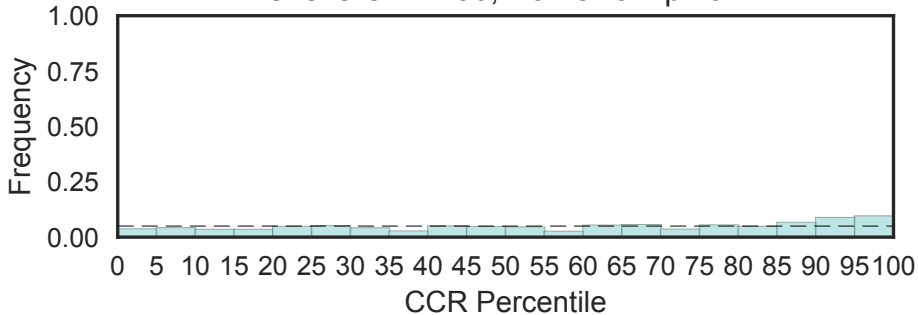

Alpha adaptin AP2, C-terminal domain  
(Alpha\_adaptin\_C, N=2)

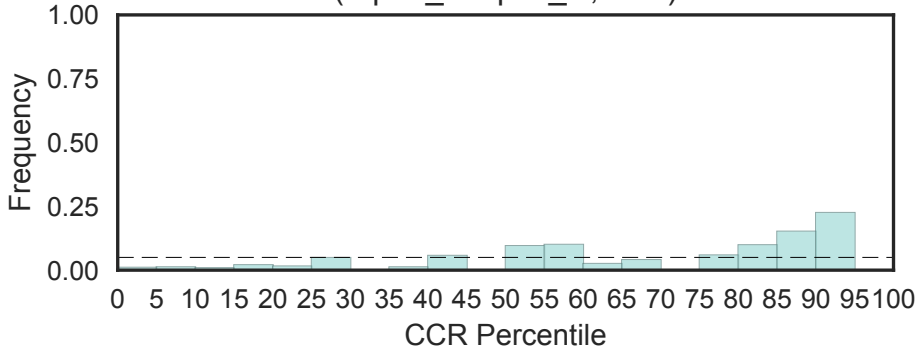

Alpha-kinase family  
(Alpha\_kinase, N=6)

Fisher's OR: 0.702; Bonferroni p-val: 1

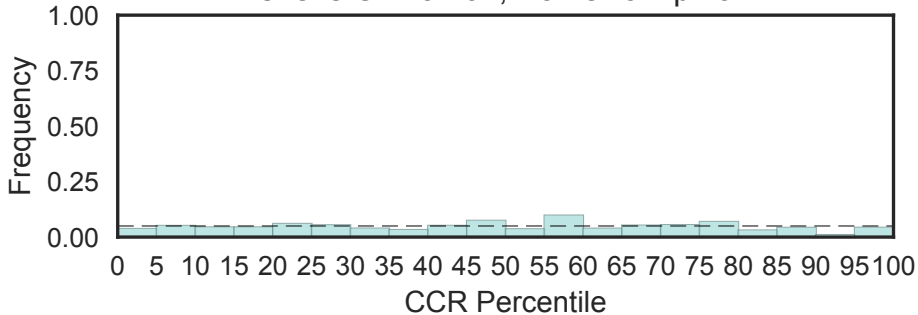

Ameloblastin precursor (Amelin)  
(Amelin, N=2)

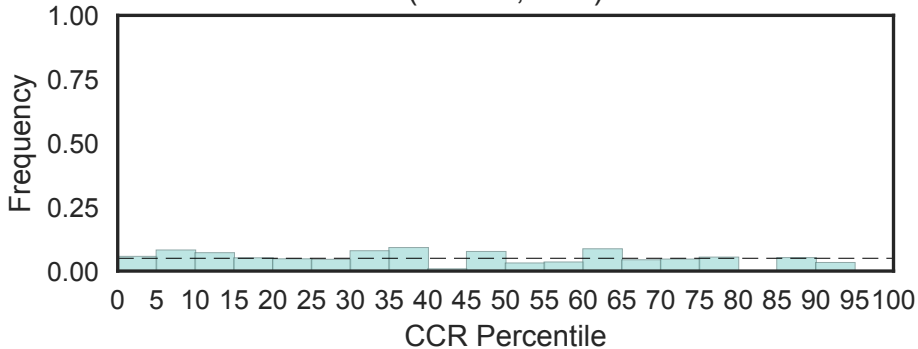

# Amelotin (Amelotin, N=1)

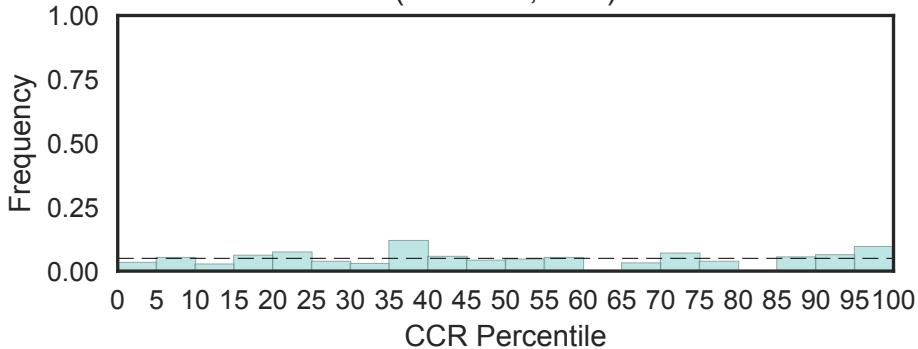

# Amidase (Amidase, N=2)

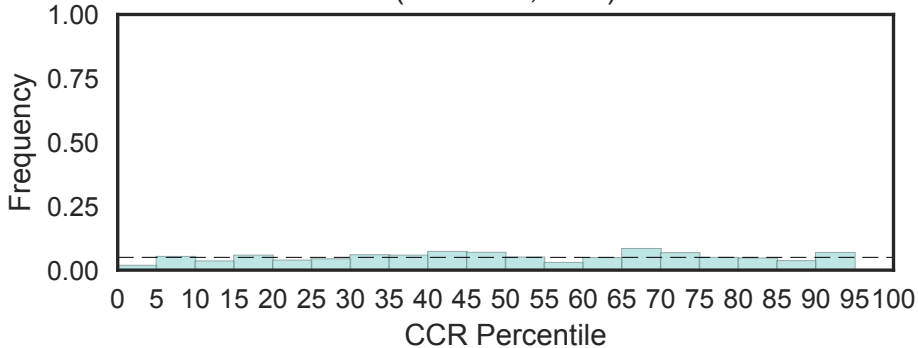

N-acetylmuramoyl-L-alanine amidase  
(Amidase\_2, N=6)

Fisher's OR: 0; Bonferroni p-val: 1

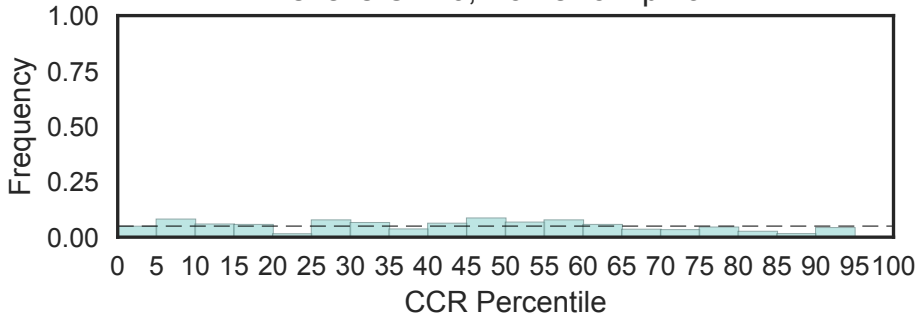



# Amidinotransferase (Amidinotransf, N=2)

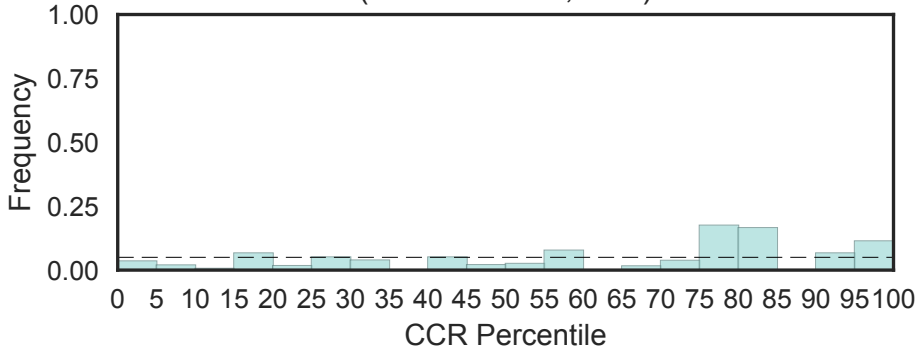

Amidohydrolase family  
(Amidohydro\_1, N=12)

Fisher's OR: 0.571; Bonferroni p-val: 1

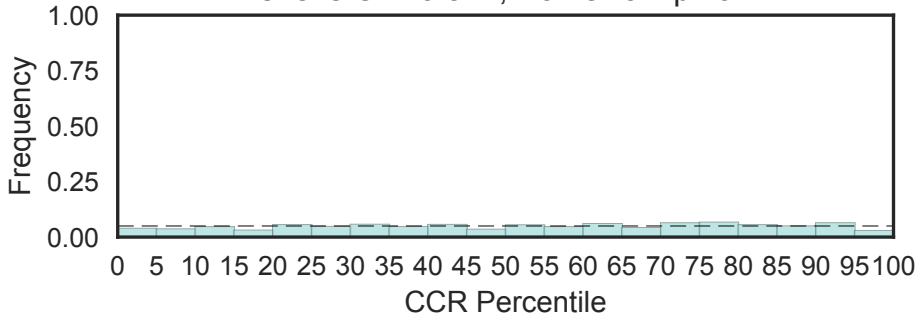

# Amidohydrolase (Amidohydro\_2, N=1)

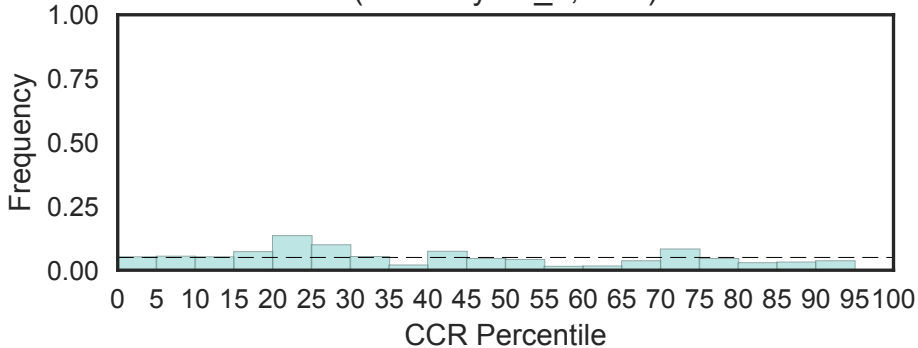

Amidohydrolase family  
(Amidohydro\_3, N=6)

Fisher's OR: 1.2; Bonferroni p-val: 1

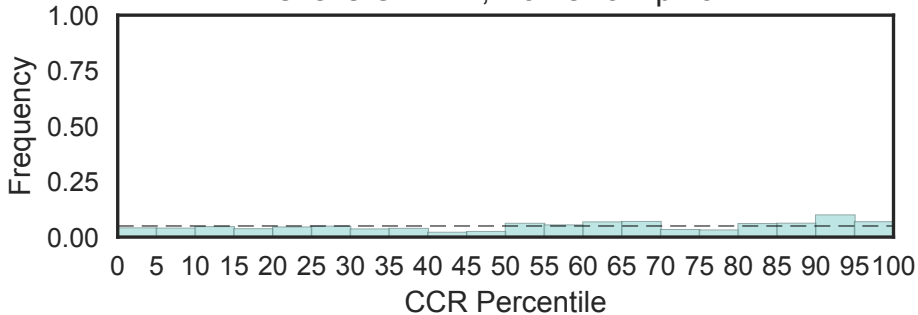

Flavin containing amine oxidoreductase  
(Amino\_oxidase, N=15)

Fisher's OR: 0.734; Bonferroni p-val: 1

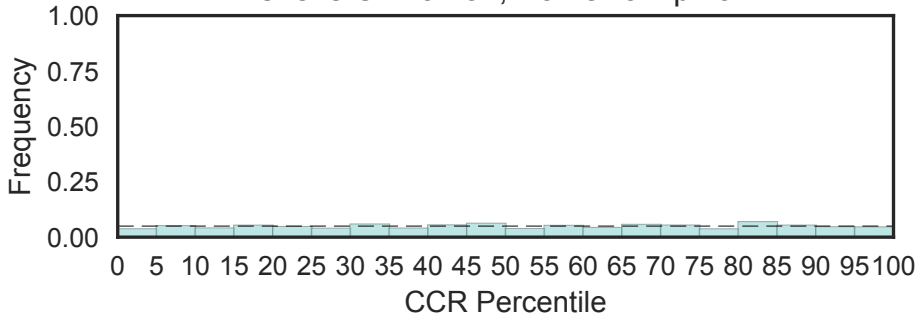

Aminotransferase class I and II  
(Aminotran\_1\_2, N=20)  
Fisher's OR: 0.604; Bonferroni p-val: 1

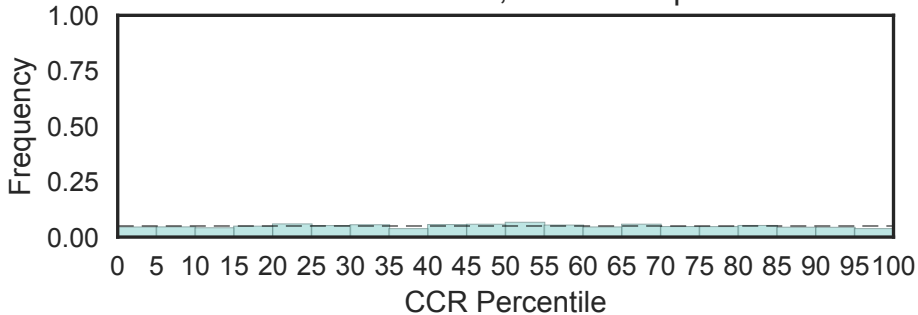

# Aminotransferase class-III

(Aminotran\_3, N=6)

Fisher's OR: 0.127; Bonferroni p-val: 1

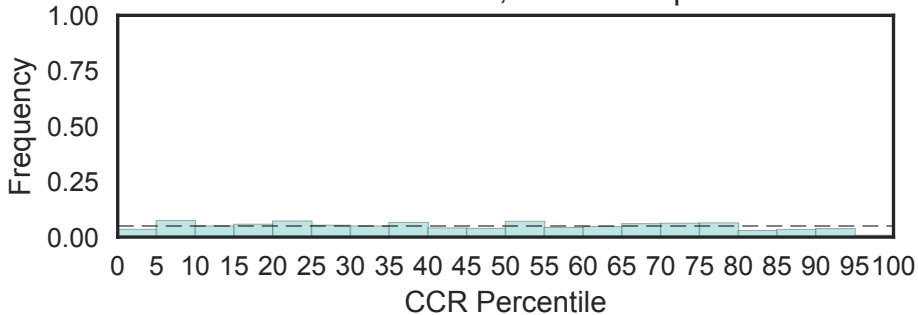

Amino-transferase class IV  
(Aminotran\_4, N=2)

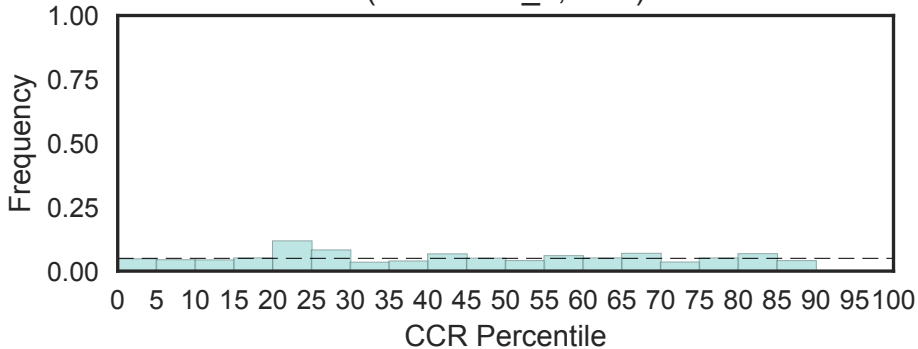



# Aminotransferase class-V

(Aminotran\_5, N=12)

Fisher's OR: 0.267; Bonferroni p-val: 1

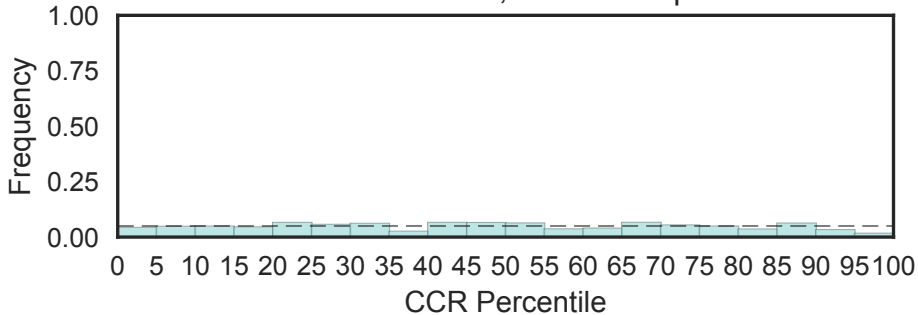

Alanine-glyoxylate amino-transferase  
(Aminotran\_MocR, N=1)

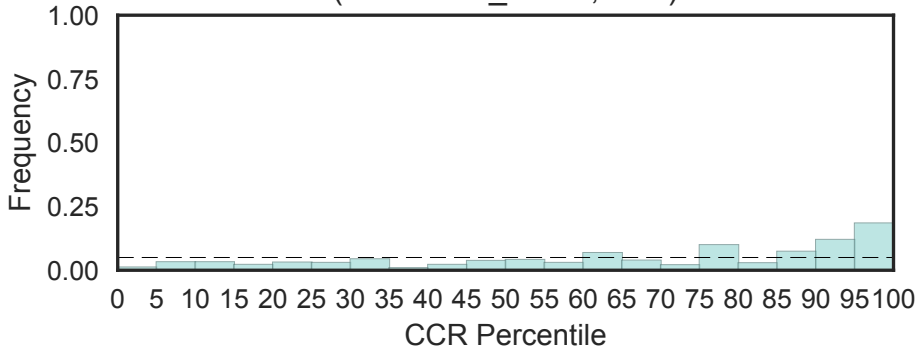

Ammonium Transporter Family  
(Ammonium\_transp, N=5)

Fisher's OR: 0; Bonferroni p-val: 1

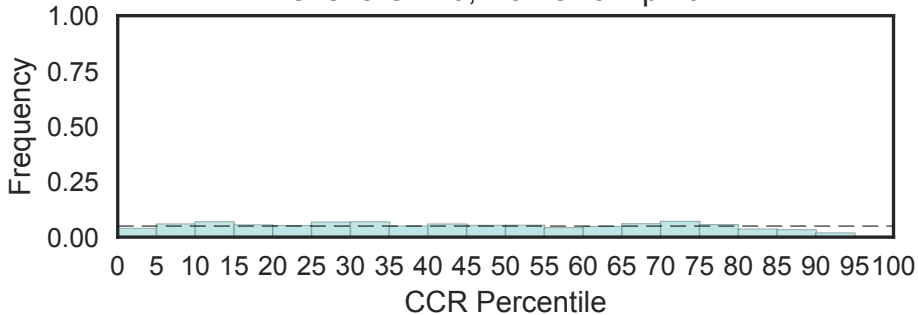

# Amnionless (Amnionless, N=1)

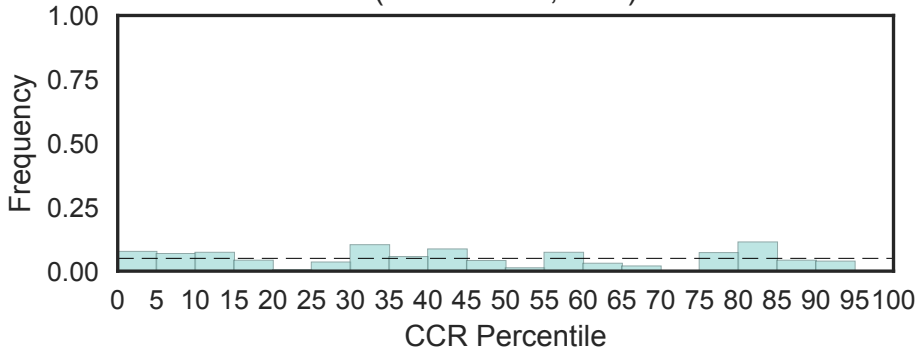

Animal haem peroxidase  
(An\_peroxidase, N=12)

Fisher's OR: 0.114; Bonferroni p-val: 0.0562

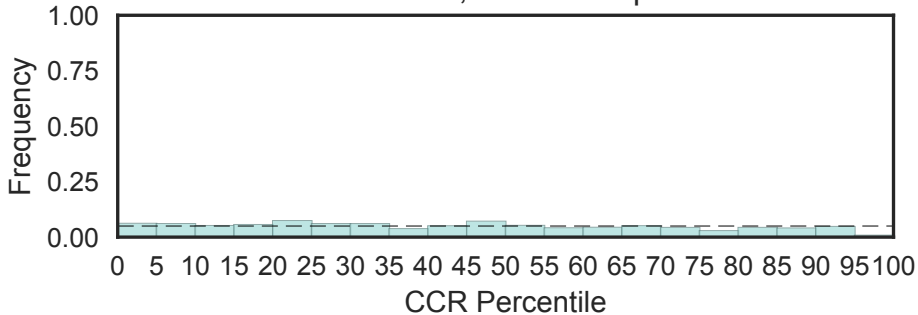

Angiotensin C terminal  
(Angiotensin\_C, N=2)

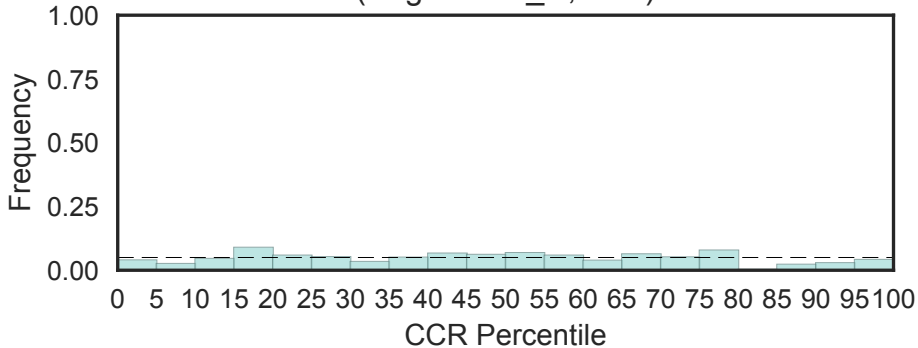

Cell division protein anillin  
(Anillin, N=3)

Fisher's OR: 0; Bonferroni p-val: 1

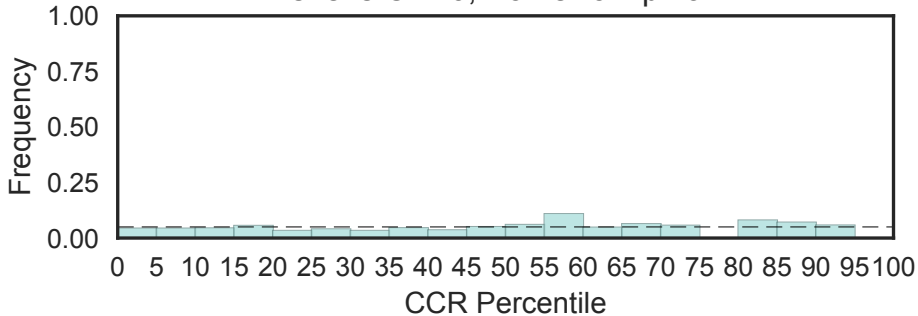

Anillin N-terminus  
(Anillin\_N, N=2)

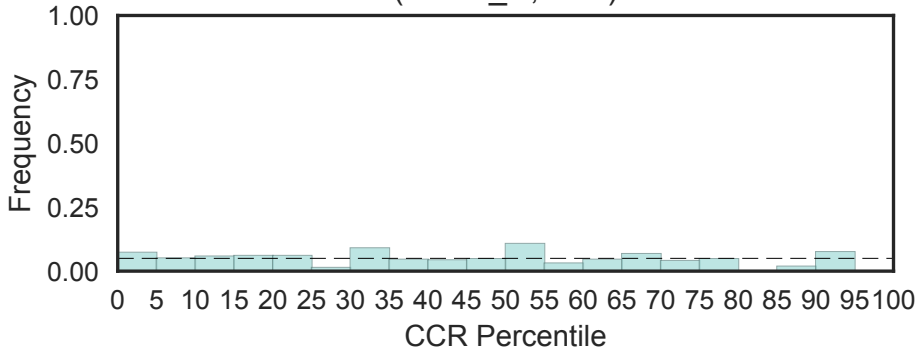



Ankyrin repeat  
(Ank, N=758)

Fisher's OR: 1.68; Bonferroni p-val: 0.00601

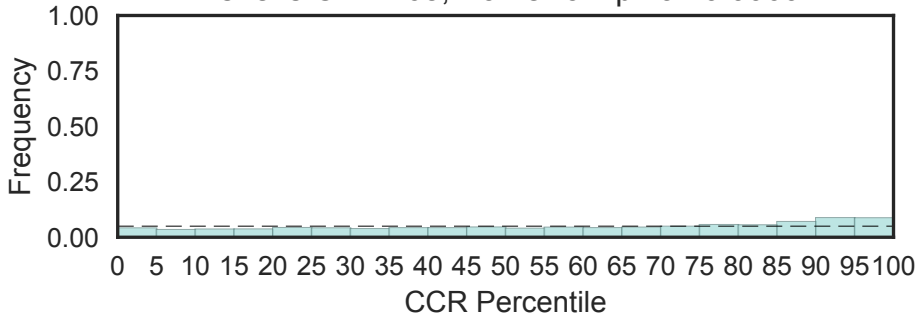

Ankyrin repeats (3 copies)

(Ank\_2, N=490)

Fisher's OR: 1.24; Bonferroni p-val: 1

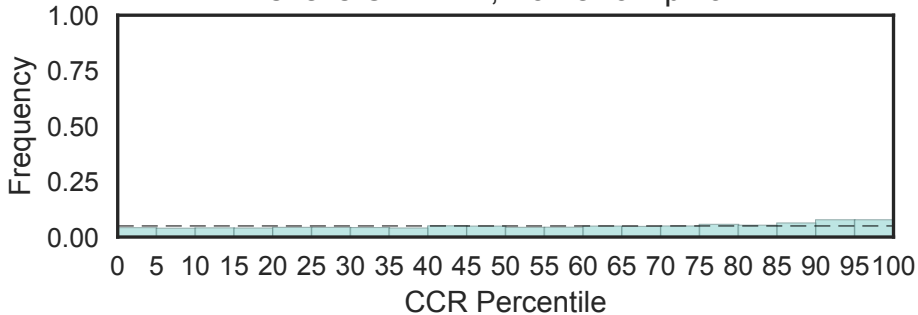

Ankyrin repeat  
(Ank\_3, N=423)

Fisher's OR: 1.57; Bonferroni p-val: 1

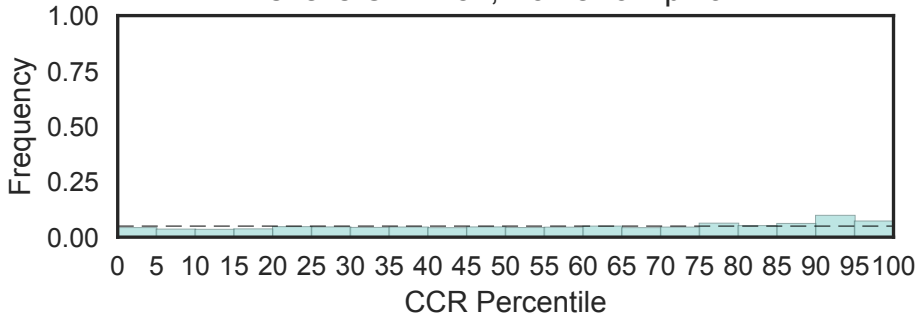

Ankyrin repeats (many copies)

(Ank\_4, N=496)

Fisher's OR: 1.46; Bonferroni p-val: 1

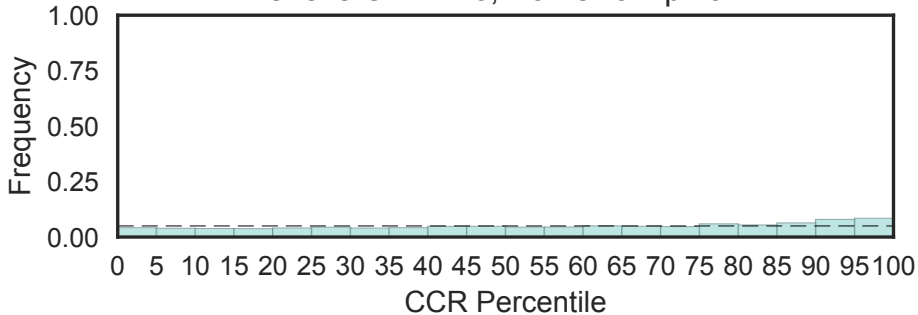

Ankyrin repeats (many copies)

(Ank\_5, N=347)

Fisher's OR: 1.17; Bonferroni p-val: 1

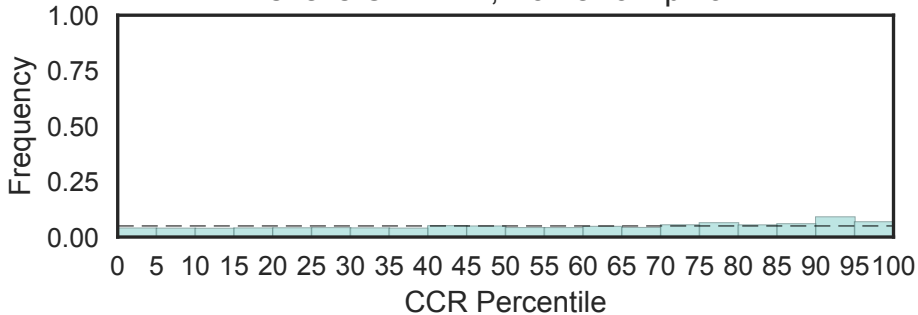

Annexin  
(Annexin, N=60)

Fisher's OR: 0.26; Bonferroni p-val: 1

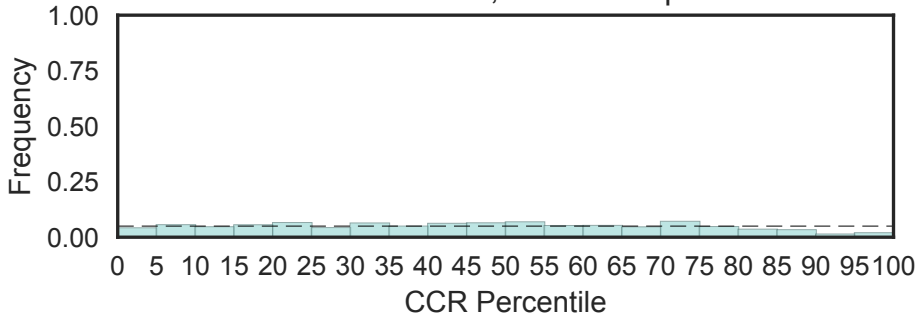

Dimerisation domain of Ca<sup>+</sup>-activated chloride-channel, anoctamin  
(Anoct\_dimer, N=7)

Fisher's OR: 0.172; Bonferroni p-val: 1

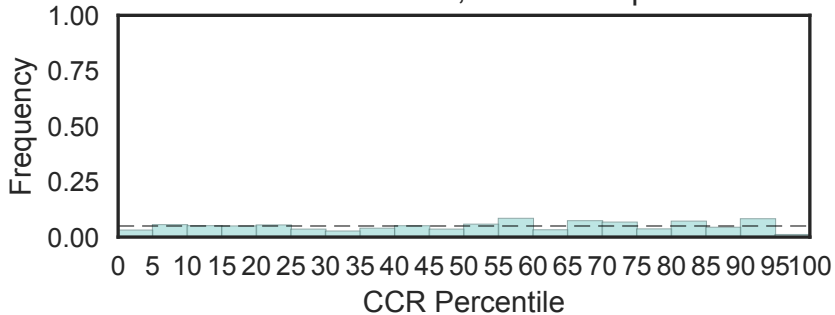

Calcium-activated chloride channel  
(Anoctamin, N=11)

Fisher's OR: 0.55; Bonferroni p-val: 1

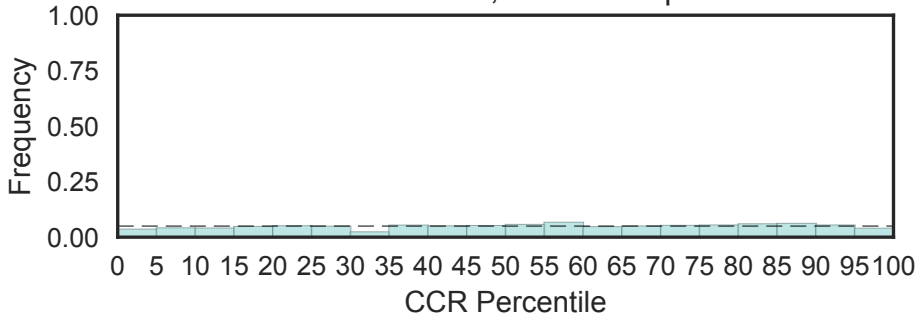



Anthrax receptor C-terminus region  
(Ant\_C, N=2)

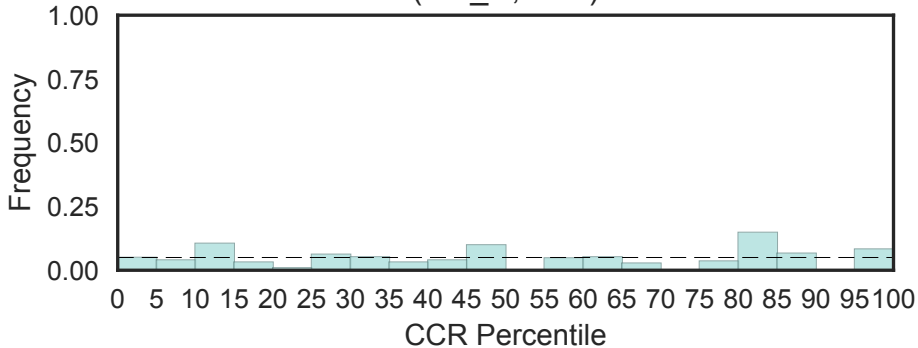

Anthrax receptor extracellular domain  
(Anth\_Ig, N=2)

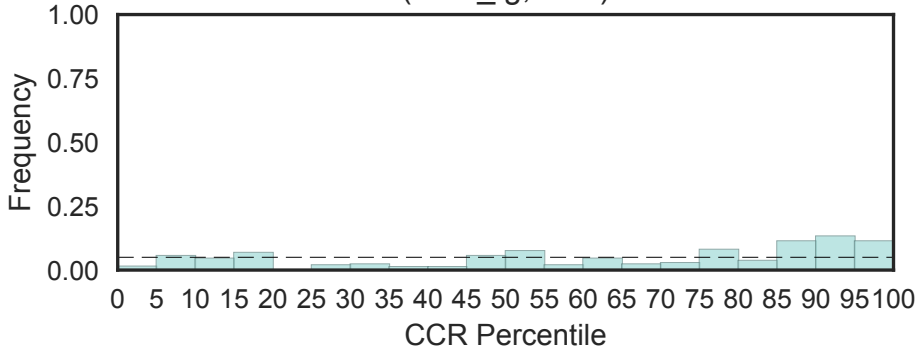

Anticodon-binding domain of tRNA  
(Anticodon\_1, N=6)

Fisher's OR: 0; Bonferroni p-val: 1

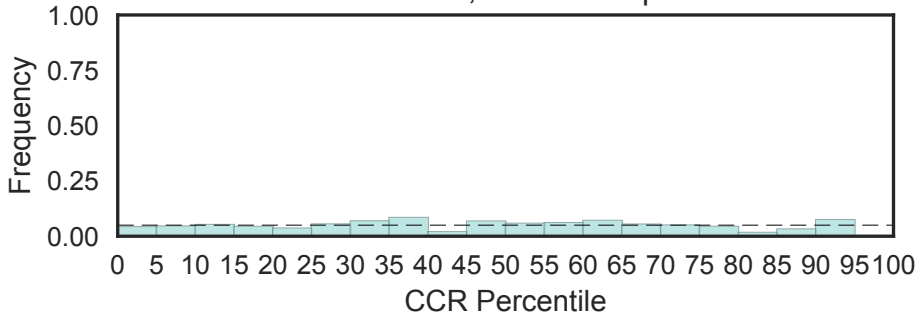

Antistasin family  
(Antistasin, N=4)

Fisher's OR: 2.3; Bonferroni p-val: 1

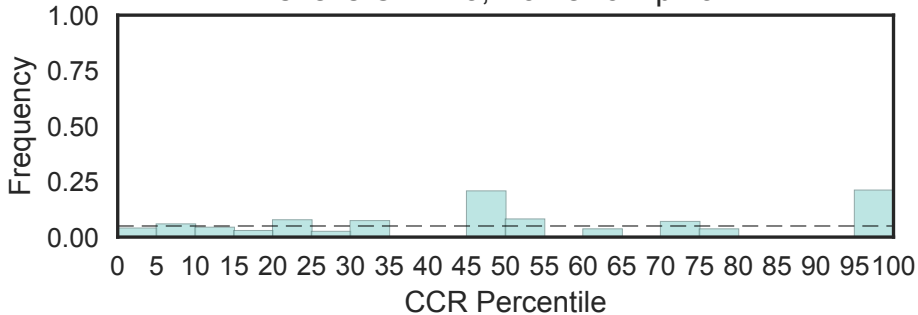

Apc13p protein  
(Apc13p, N=1)

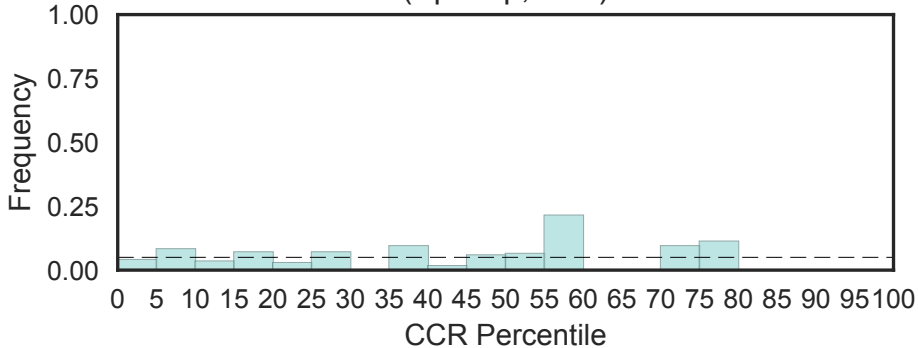

Aph-1 protein  
(Aph-1, N=2)

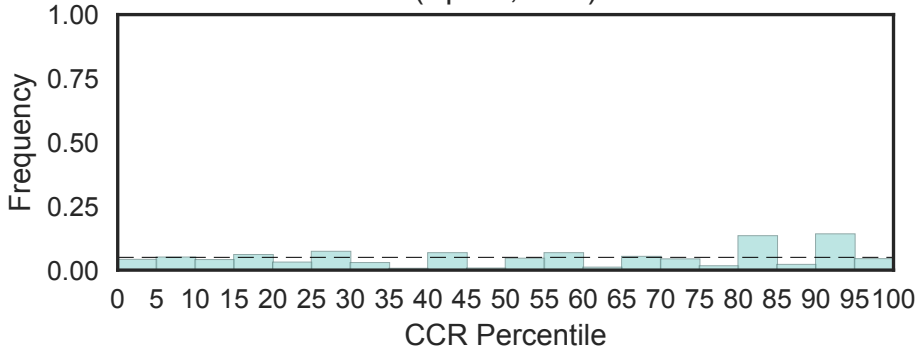

Apolipoprotein CIII (Apo-CIII)  
(Apo-CIII, N=1)

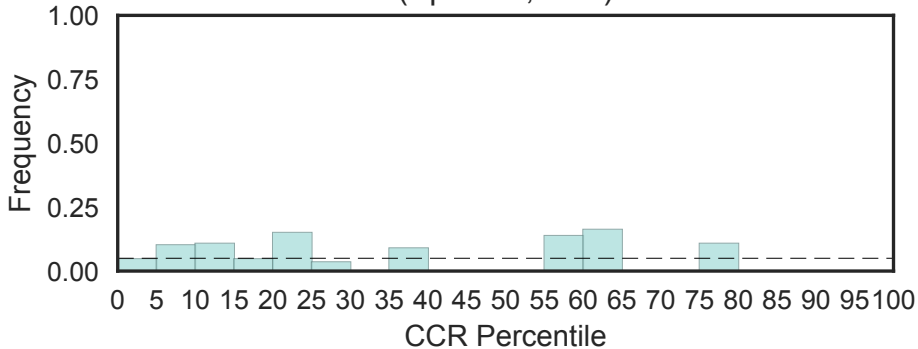

Apolipoprotein A-II (ApoA-II)  
(ApoA-II, N=2)

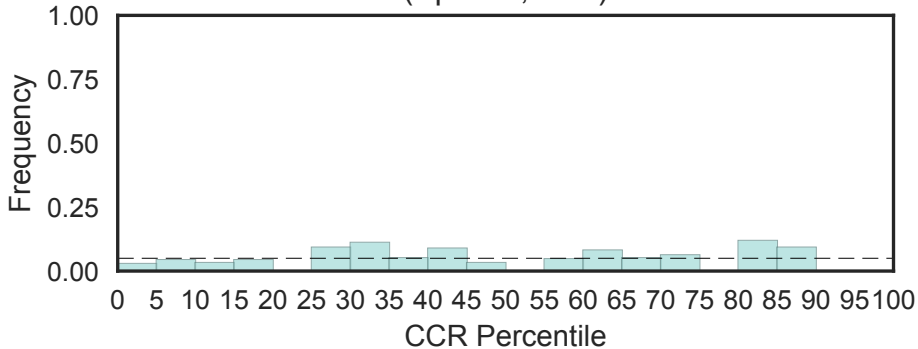



Apolipoprotein B100 C terminal  
(ApoB100\_C, N=1)

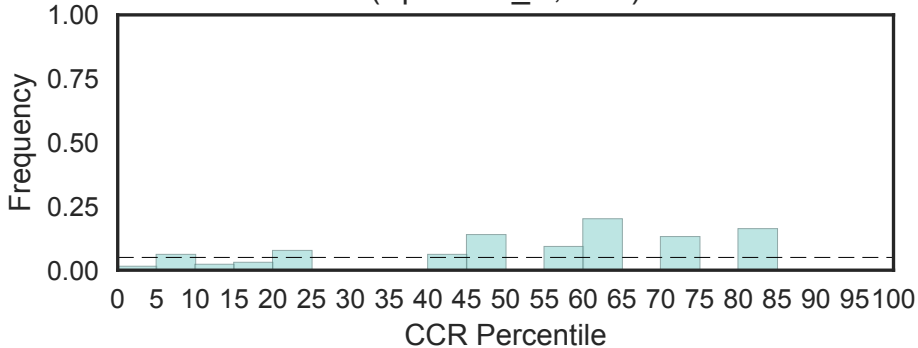

Apolipoprotein C-I (ApoC-1)  
(ApoC-1, N=1)

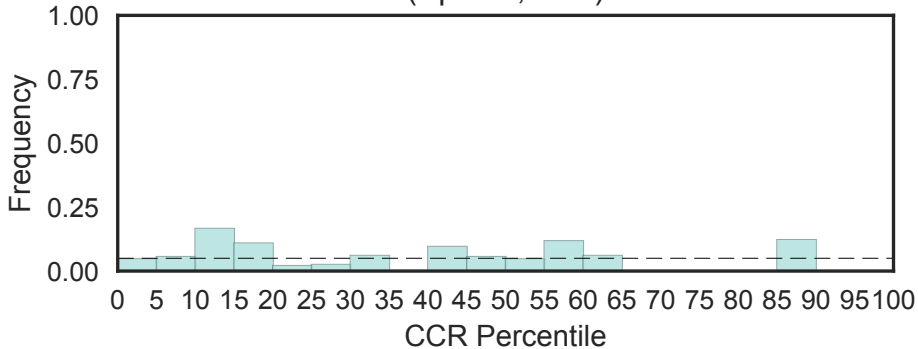

# Apolipoprotein L

(ApoL, N=7)

Fisher's OR: 0.227; Bonferroni p-val: 1

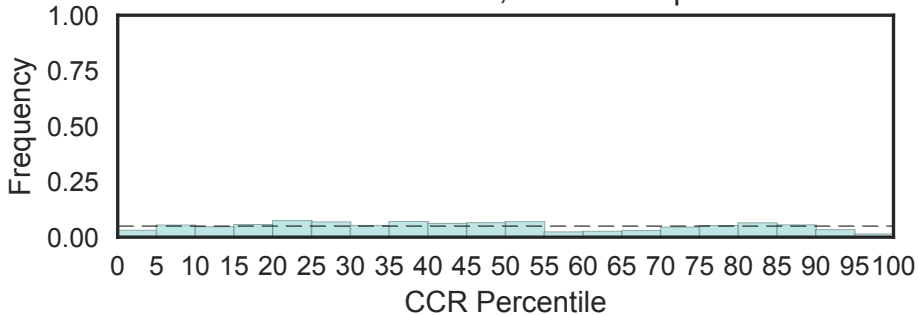

Apolipoprotein F  
(Apolipo\_F, N=1)

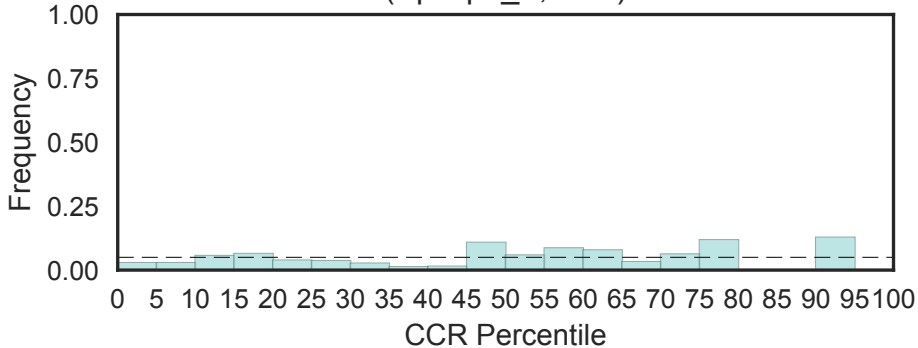

Apolipoprotein A1/A4/E domain  
(Apolipoprotein, N=49)

Fisher's OR: 0.391; Bonferroni p-val: 1

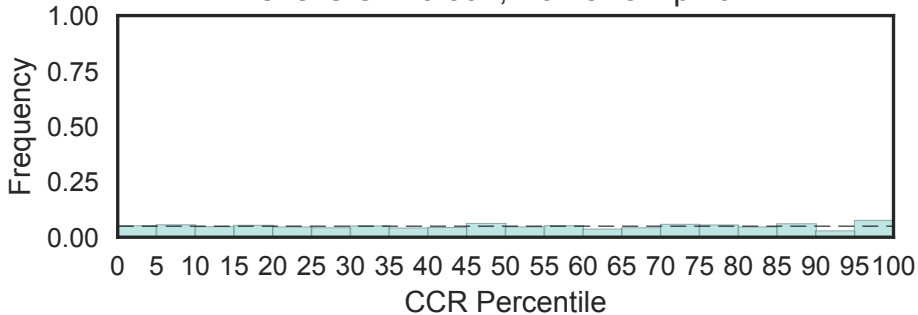

# Golgi-body localisation protein domain (Apt1, N=1)

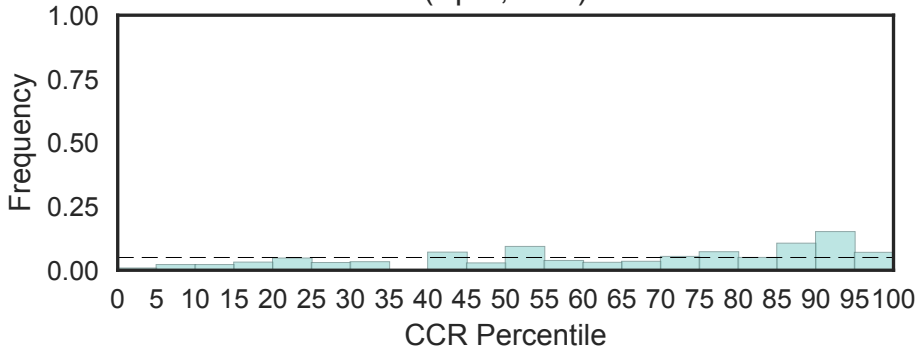

# Apyrase

(Apyrase, N=1)

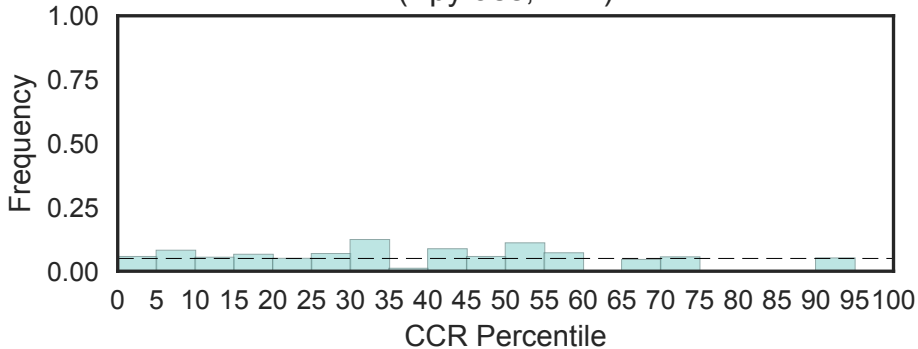

Intron-binding protein aquarius N-terminus  
(Aquarius\_N, N=1)

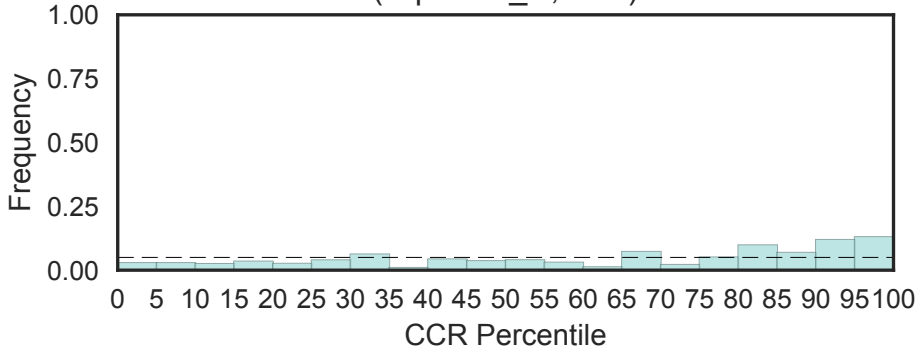



AraC-like ligand binding domain  
(AraC\_binding, N=1)

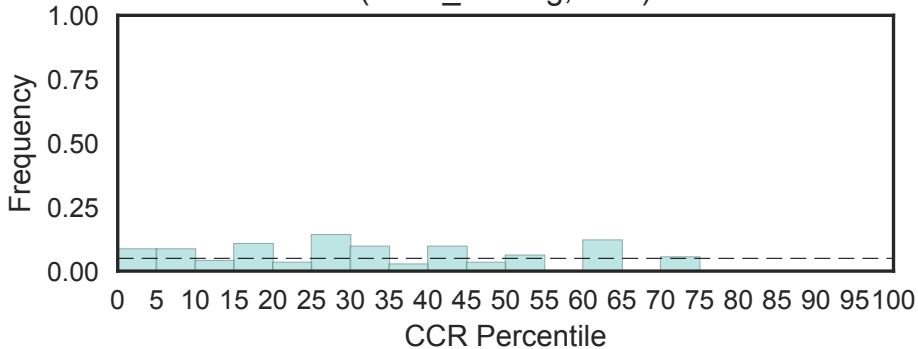

Arb2 domain  
(Arb2, N=1)

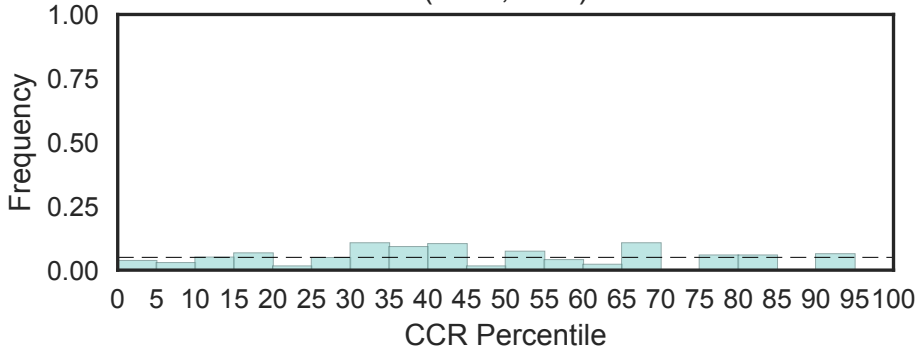

Archease protein family (MTH1598/TM1083)  
(Archease, N=1)

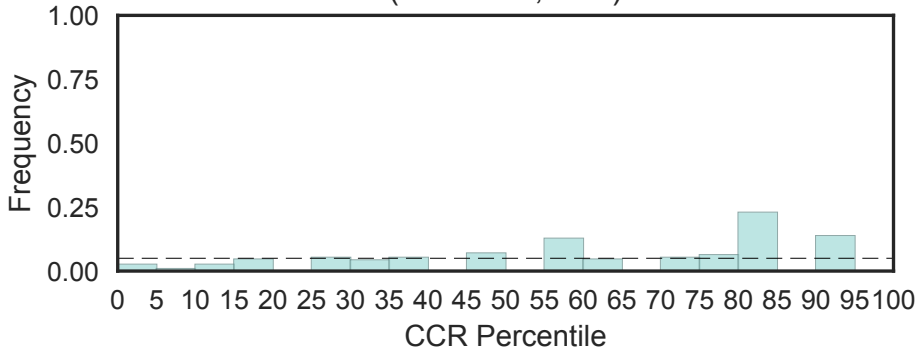

ADP-ribosylation factor family  
(Arf, N=169)

Fisher's OR: 3.14; Bonferroni p-val: 6.1e-34

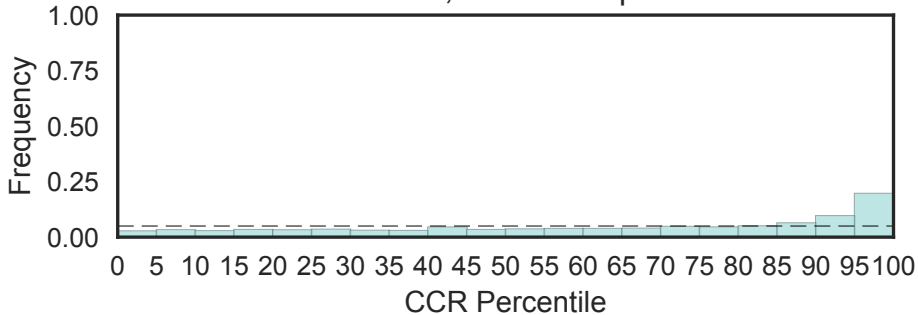

Putative GTPase activating protein for Arf  
(ArfGap, N=31)

Fisher's OR: 1.22; Bonferroni p-val: 1

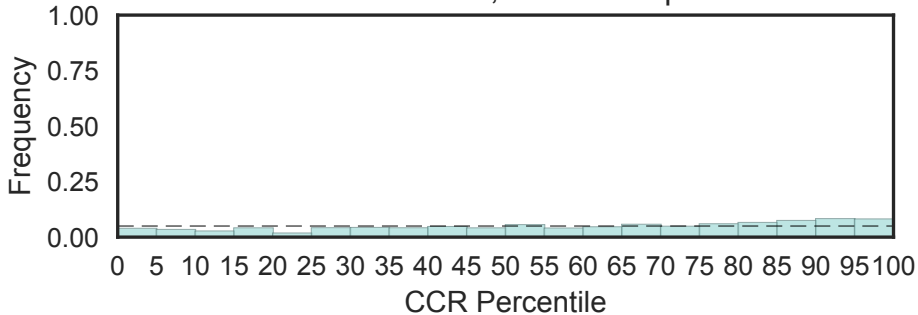

Arfaptin-like domain  
(Arfaptin, N=5)

Fisher's OR: 0; Bonferroni p-val: 1

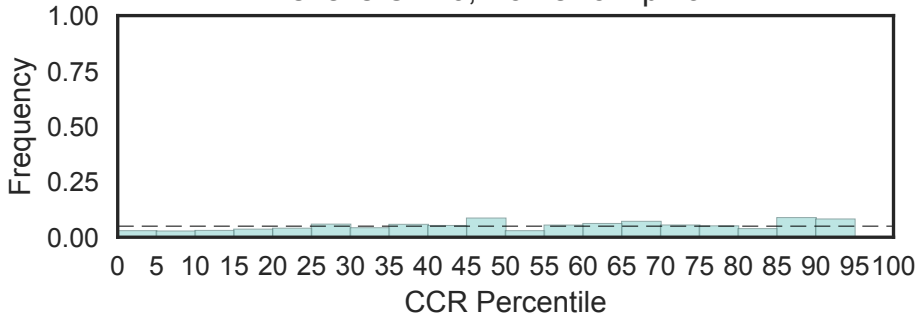

ArgK protein  
(ArgK, N=2)

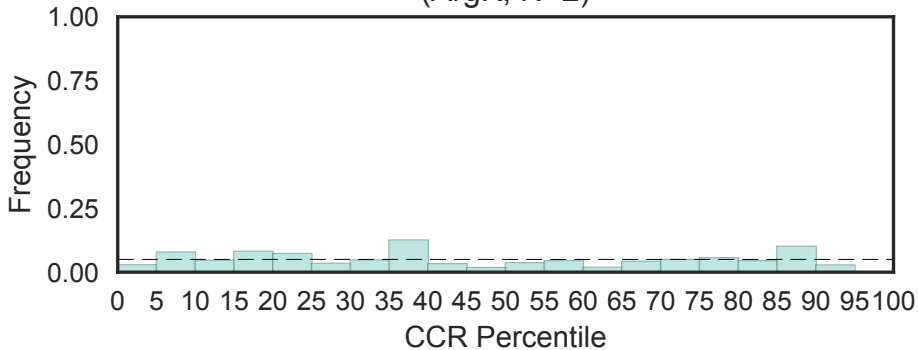

Arginyl tRNA synthetase N terminal domain  
(Arg\_tRNA\_synt\_N, N=1)

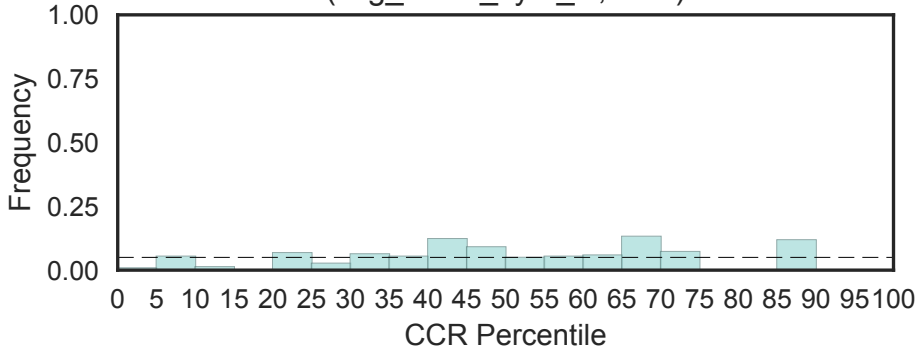



Arginase family  
(Arginase, N=5)

Fisher's OR: 0; Bonferroni p-val: 1

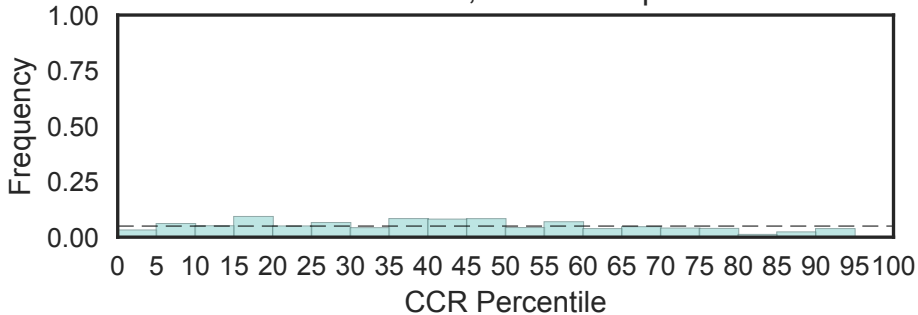

# Argininosuccinate synthase (Arginosuc\_synth, N=1)

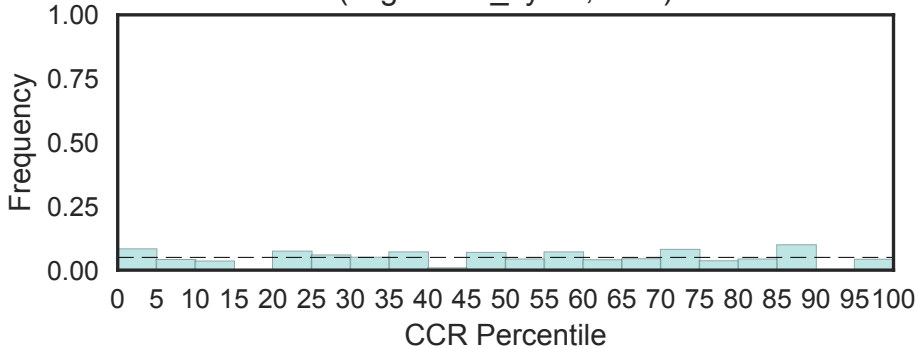

Argonaute linker 1 domain  
(ArgoL1, N=6)

Fisher's OR: 12.4; Bonferroni p-val: 0.0195

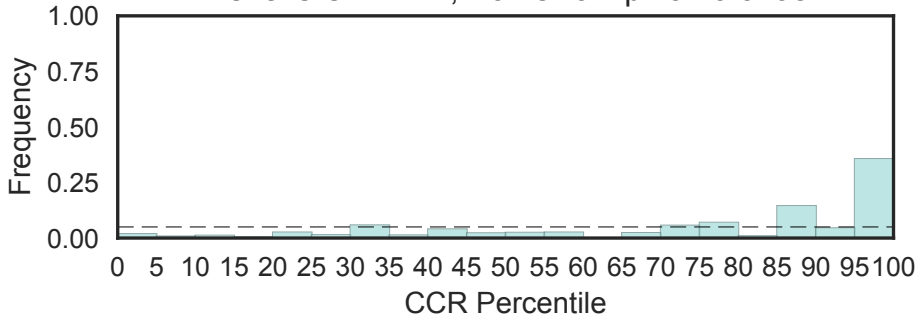

Argonaute linker 2 domain  
(ArgoL2, N=4)

Fisher's OR: 8.11; Bonferroni p-val: 1

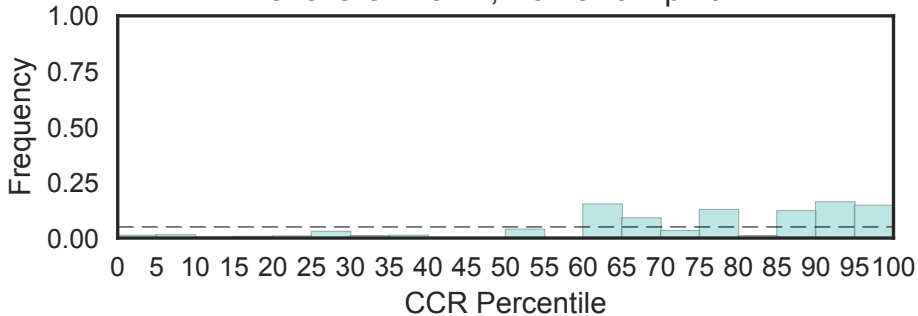

Mid domain of argonaute  
(ArgoMid, N=4)

Fisher's OR: 15.1; Bonferroni p-val: 0.0358

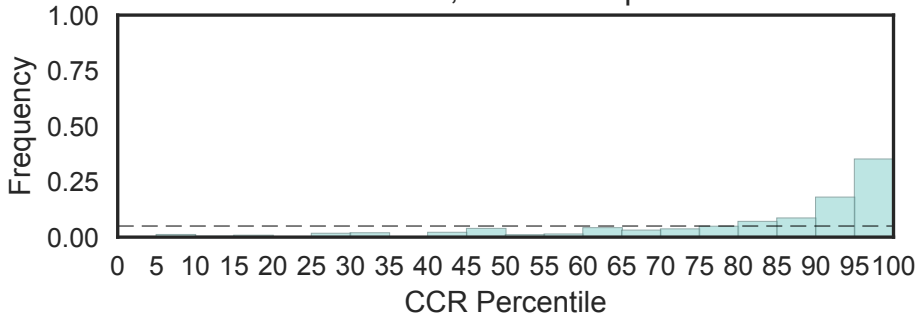

N-terminal domain of argonaute  
(ArgoN, N=4)

Fisher's OR: 1.5; Bonferroni p-val: 1

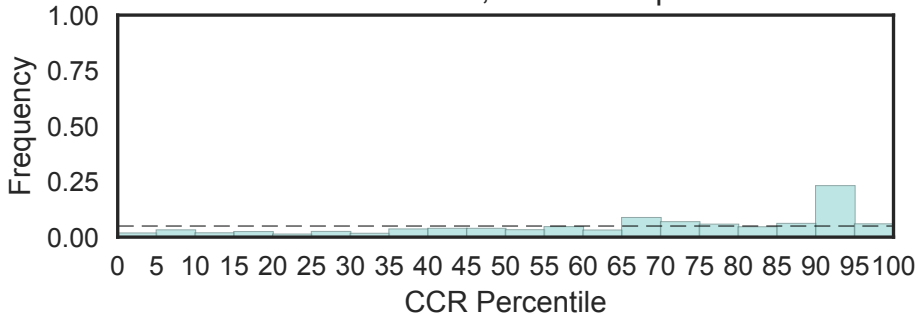

Armadillo/beta-catenin-like repeat  
(Arm, N=105)

Fisher's OR: 3.17; Bonferroni p-val: 5.73e-05

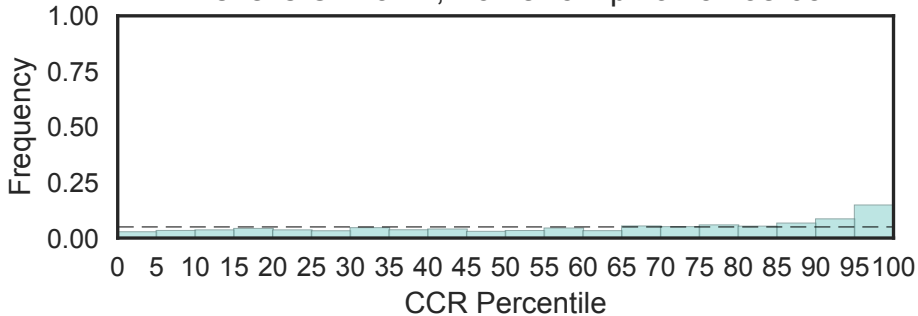

Armadillo-like  
(Arm\_2, N=3)

Fisher's OR: 0.476; Bonferroni p-val: 1

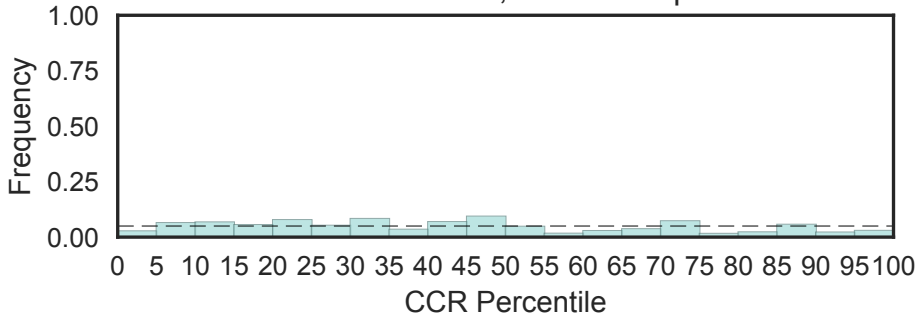



Atypical Arm repeat  
(Arm\_3, N=7)

Fisher's OR: 4.91; Bonferroni p-val: 1

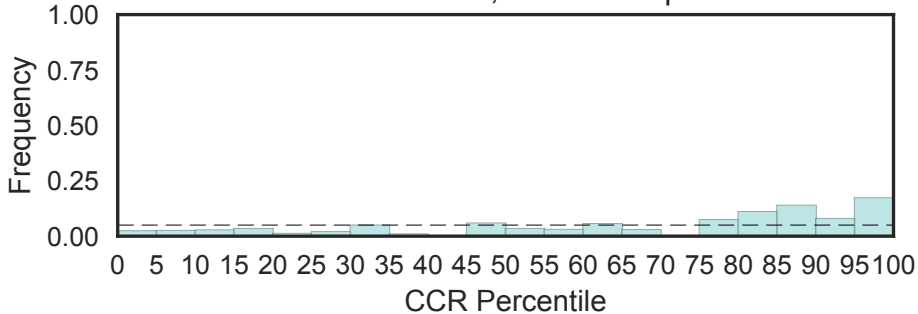

Armadillo-associated region on APC  
(Arm\_APC\_u3, N=2)

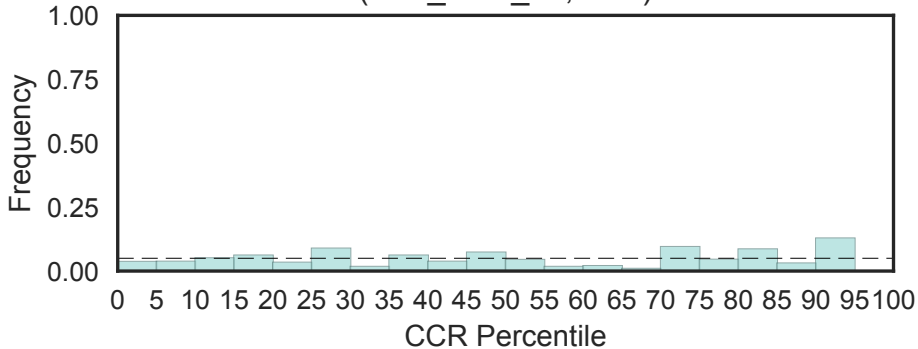

# Degradation arginine-rich protein for mis-folding (Armet, N=2)

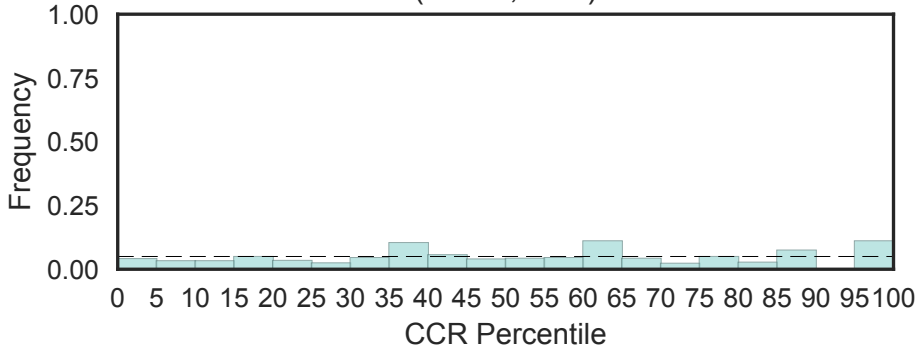

Arrestin (or S-antigen), C-terminal domain  
(Arrestin\_C, N=9)

Fisher's OR: 1.77; Bonferroni p-val: 1

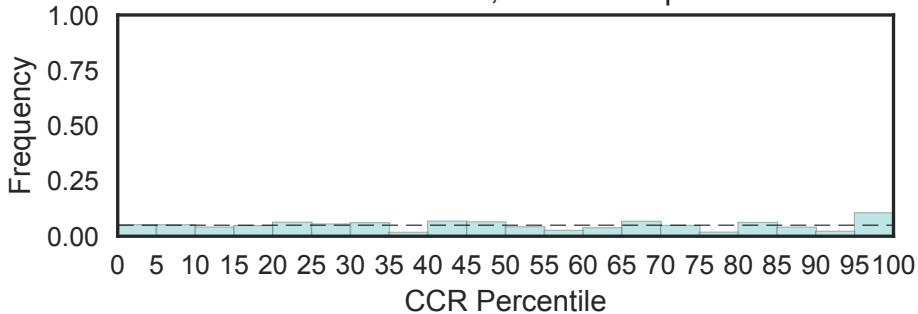

Arrestin (or S-antigen), N-terminal domain  
(Arrestin\_N, N=10)

Fisher's OR: 1.05; Bonferroni p-val: 1

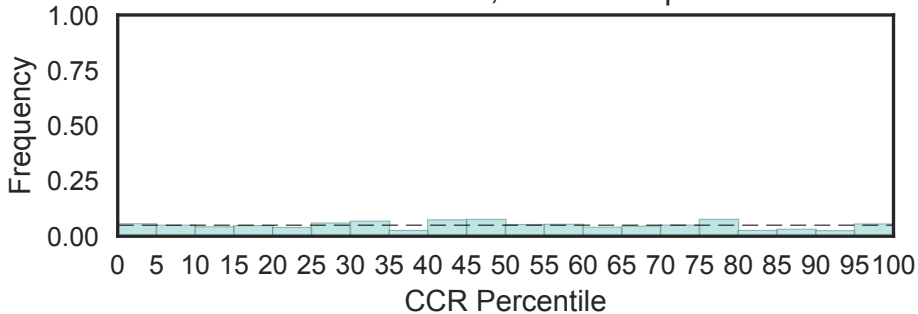

Anion-transporting ATPase  
(ArsA\_ATPase, N=3)

Fisher's OR: 4.55; Bonferroni p-val: 1

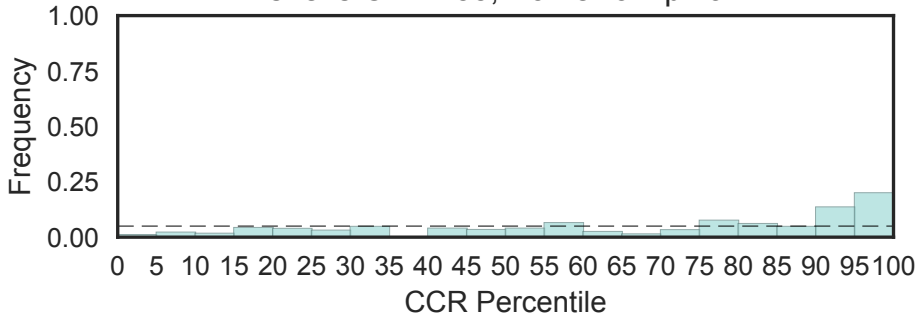

Arv1-like family  
(Arv1, N=1)

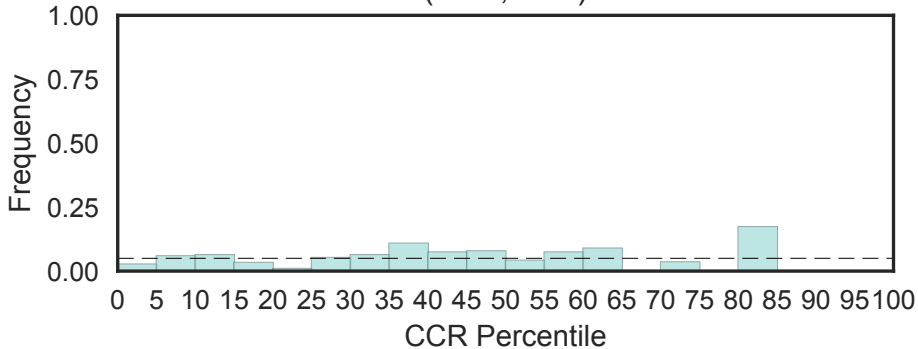

# Arylesterase (Arylesterase, N=3)

Fisher's OR: 0; Bonferroni p-val: 1

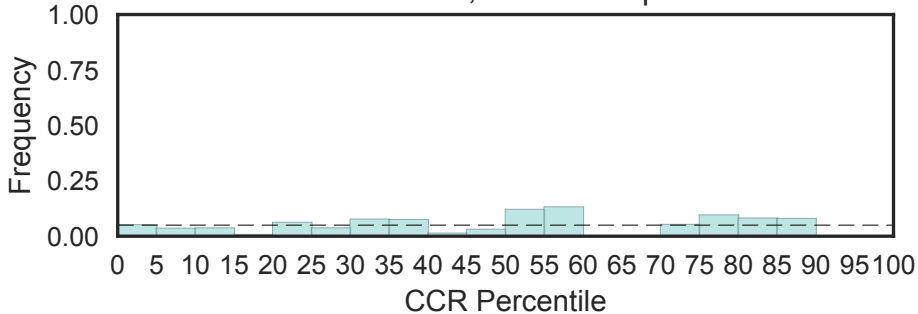



Developmental protein  
(Ashwin, N=1)

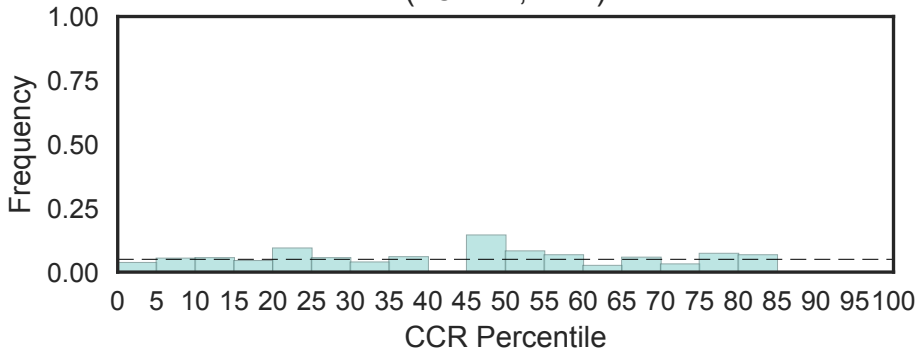

Asparagine synthase  
(Asn\_synthase, N=3)

Fisher's OR: 0; Bonferroni p-val: 1

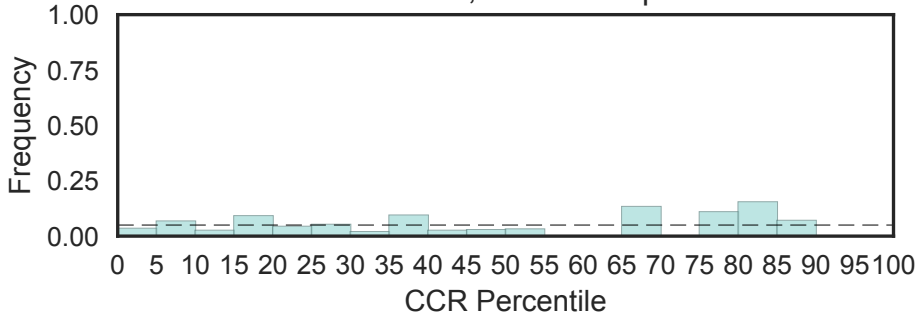

Eukaryotic aspartyl protease  
(Asp, N=12)

Fisher's OR: 0.535; Bonferroni p-val: 1

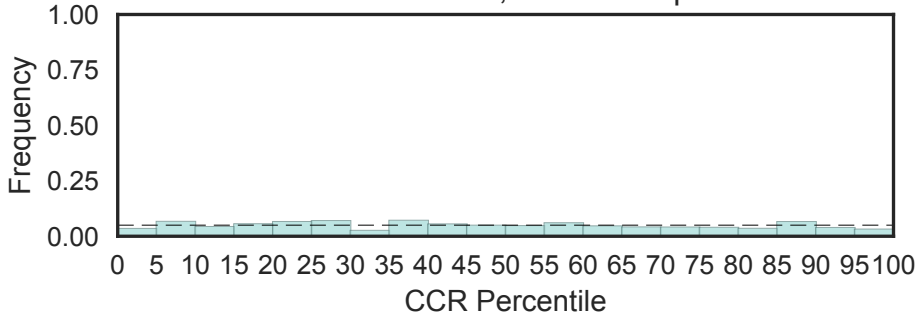

Aspartyl beta-hydroxylase N-terminal region  
(Asp-B-Hydro\_N, N=2)

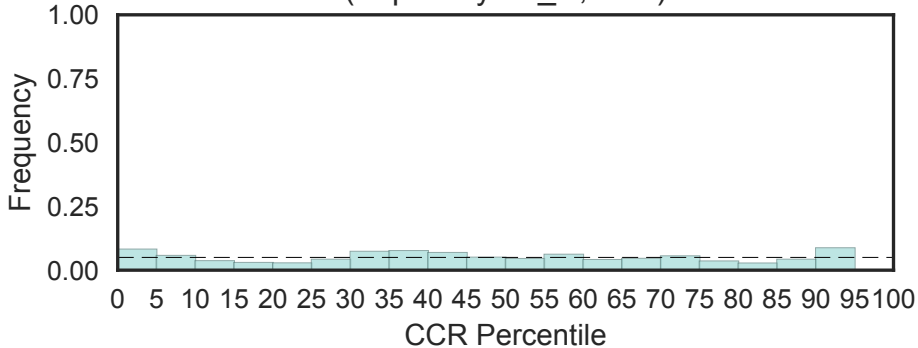

Aspartyl/Asparaginyl beta-hydroxylase  
(Asp\_Arg\_Hydrox, N=3)

Fisher's OR: 0.772; Bonferroni p-val: 1

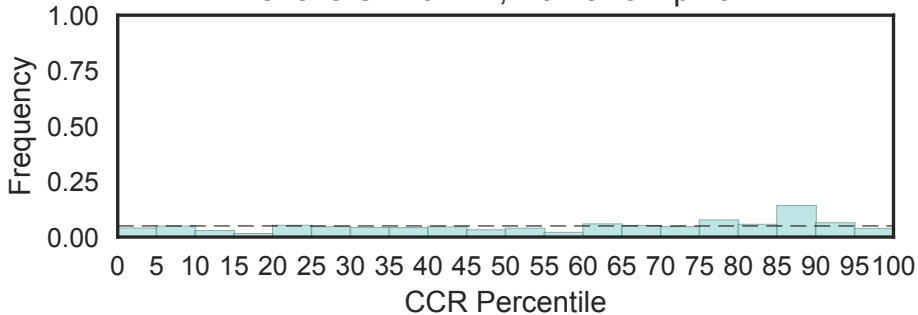

Putative aspartate racemase  
(Asp\_Glu\_race\_2, N=1)

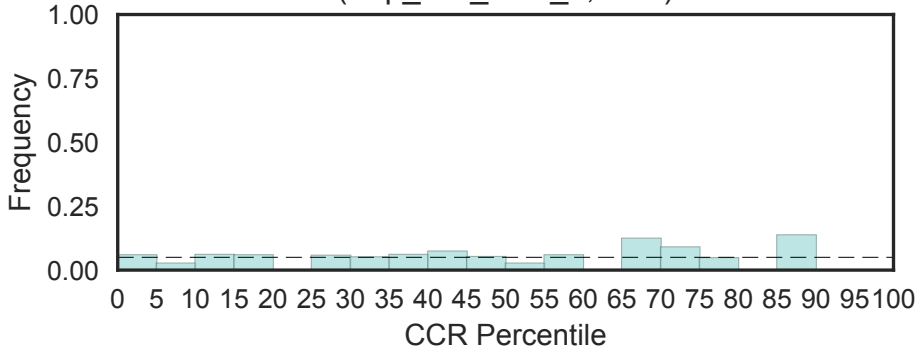

# Aspartyl protease

(Asp\_protease, N=5)

Fisher's OR: 0.546; Bonferroni p-val: 1

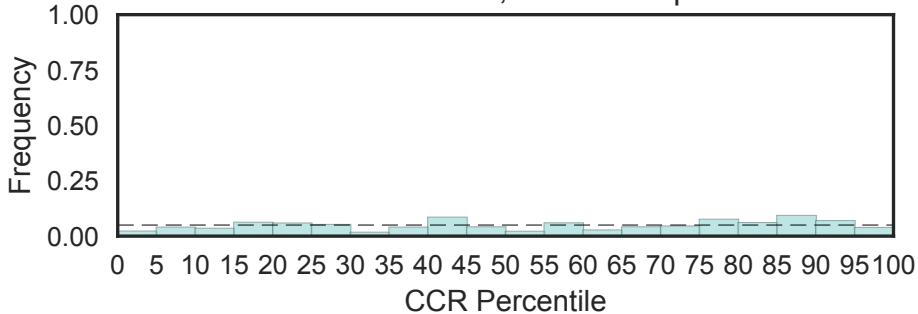

Aspartyl protease  
(Asp\_protease\_2, N=4)

Fisher's OR: 0.916; Bonferroni p-val: 1

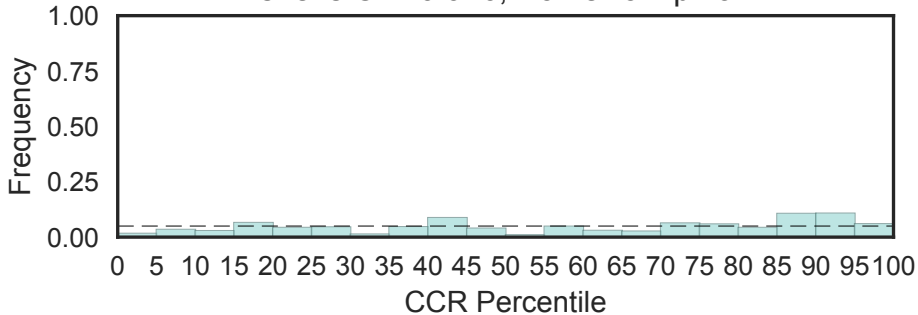



# Asparaginase, N-terminal (Asparaginase, N=1)

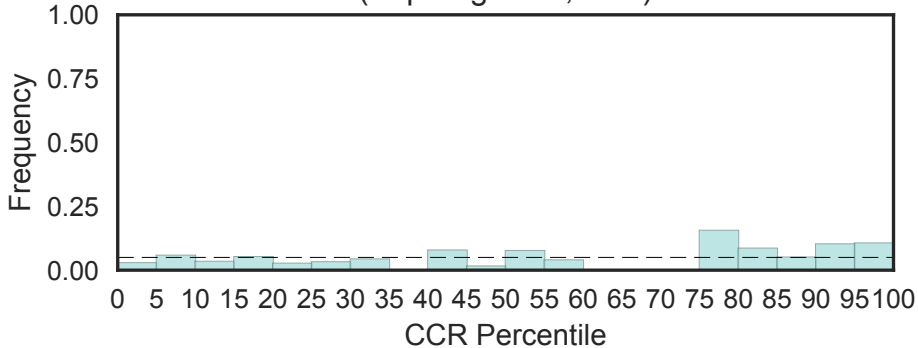

Asparaginase  
(Asparaginase\_2, N=3)  
Fisher's OR: 0.305; Bonferroni p-val: 1

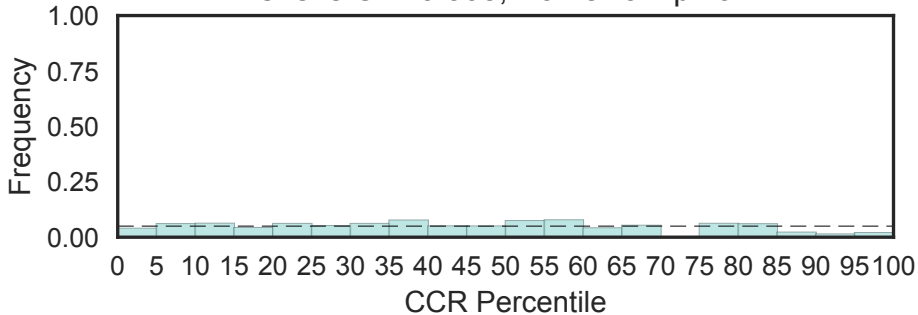

Succinylglutamate desuccinylase / Aspartoacylase family  
(AstE\_AspA, N=3)

Fisher's OR: 0.395; Bonferroni p-val: 1

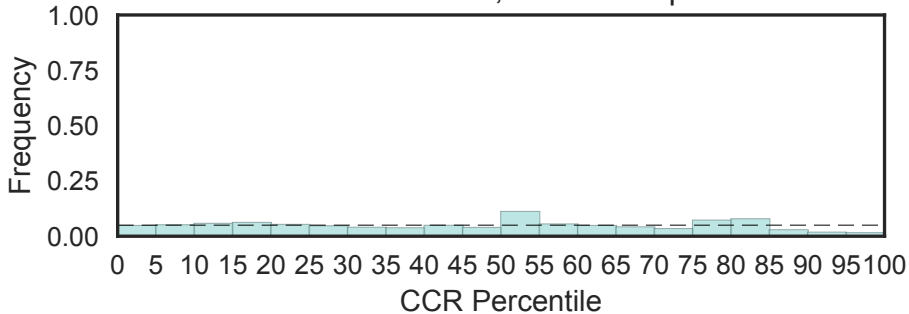

Astacin (Peptidase family M12A)  
(Astacin, N=6)

Fisher's OR: 0; Bonferroni p-val: 1

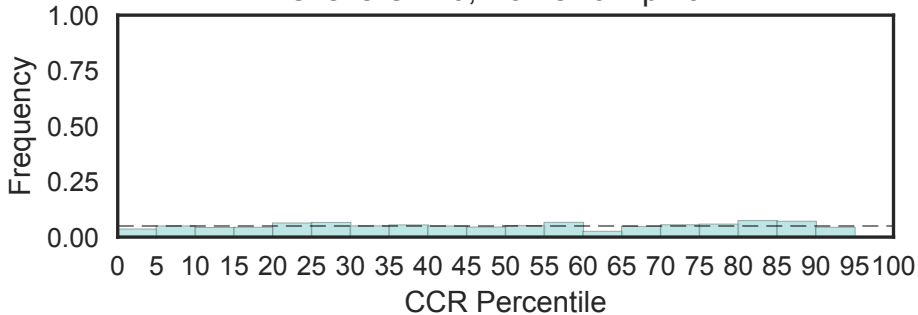

# Vacuolar sorting 38 and autophagy-related subunit 14 (Atg14, N=2)

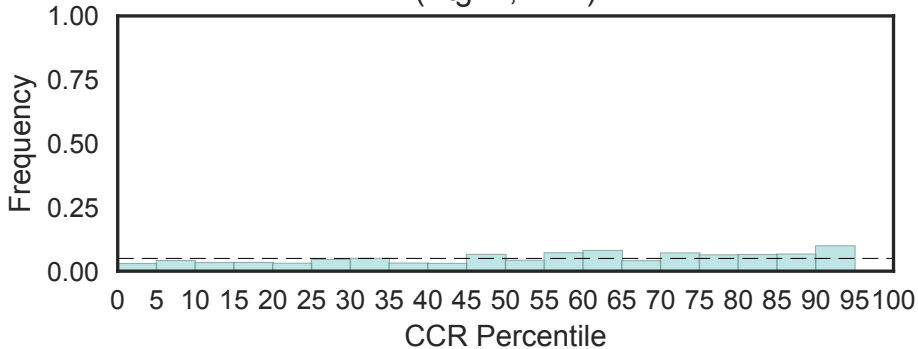

Autophagy protein Atg8 ubiquitin like  
(Atg8, N=8)

Fisher's OR: 0.374; Bonferroni p-val: 1

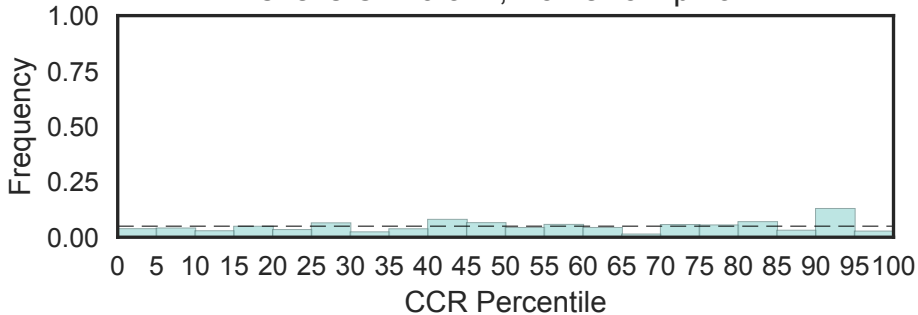

Atrophin-1 family  
(Atrophin-1, N=3)

Fisher's OR: 0.569; Bonferroni p-val: 1

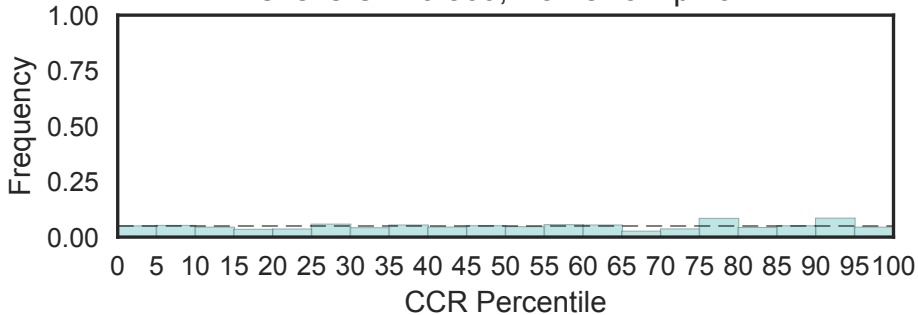

Spinocerebellar ataxia type 10 protein domain  
(Atx10homo\_assoc, N=1)

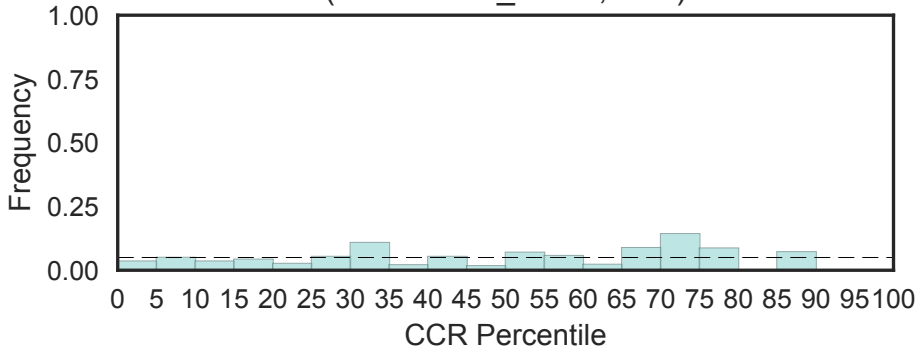



# Oesophageal cancer-related gene 4 (Augurin, N=1)

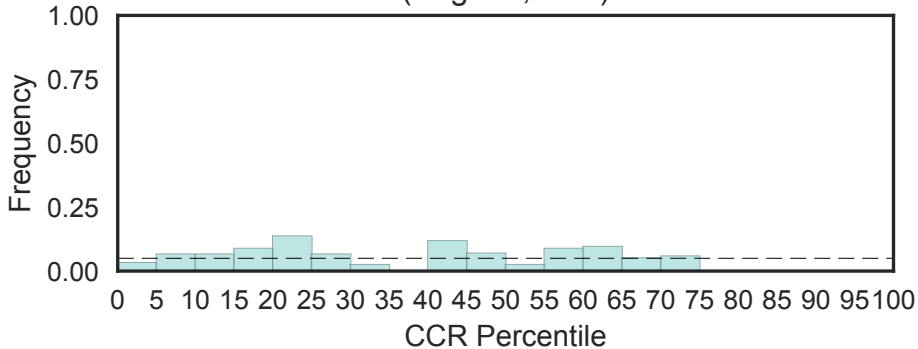

Aurora-A binding  
(Aurora-A\_bind, N=1)

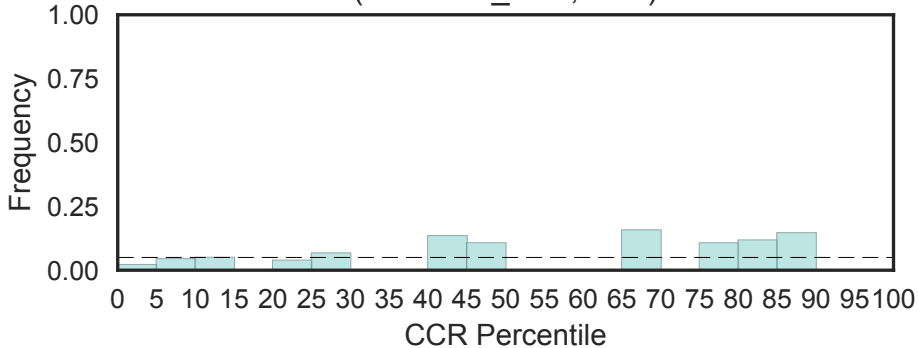

Sjogren's syndrome/scleroderma autoantigen 1 (Autoantigen p27)  
(Auto\_anti-p27, N=1)

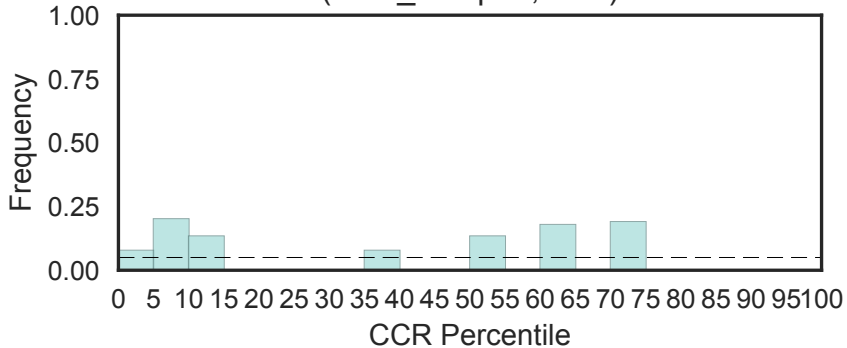

Autophagy associated protein C-terminal  
(Autophagy\_C, N=1)

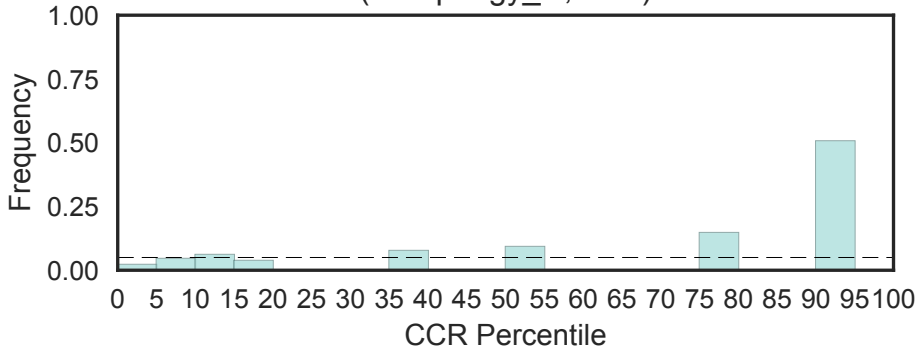

Autophagy associated protein (Atg3), N-terminal domain  
(Autophagy\_N, N=1)

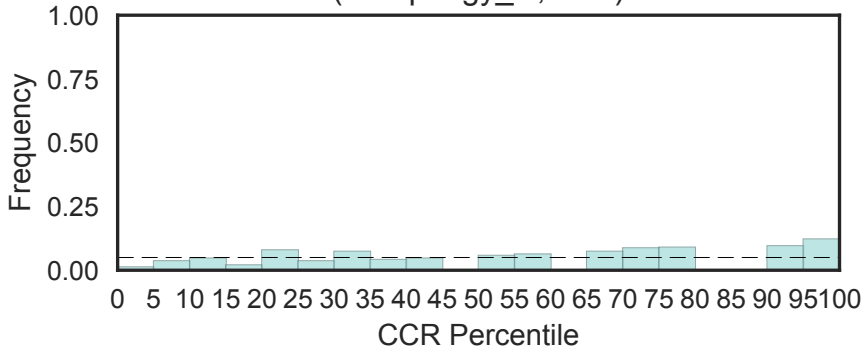

Autophagy associated protein, active-site domain  
(Autophagy\_act\_C, N=2)

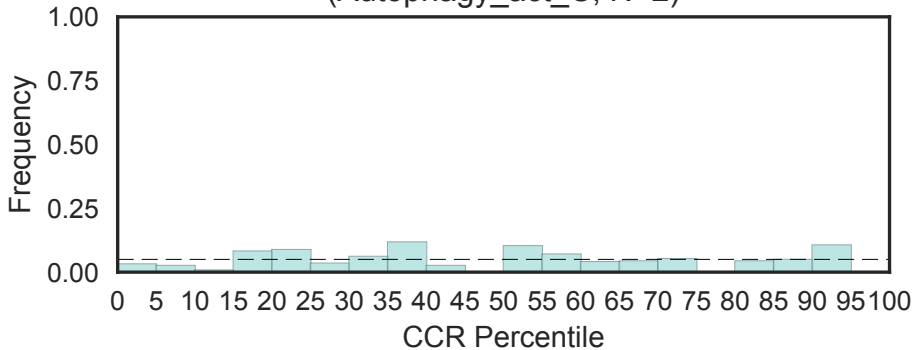

Autism susceptibility gene 2 protein  
(Auts2, N=3)

Fisher's OR: 0.557; Bonferroni p-val: 1

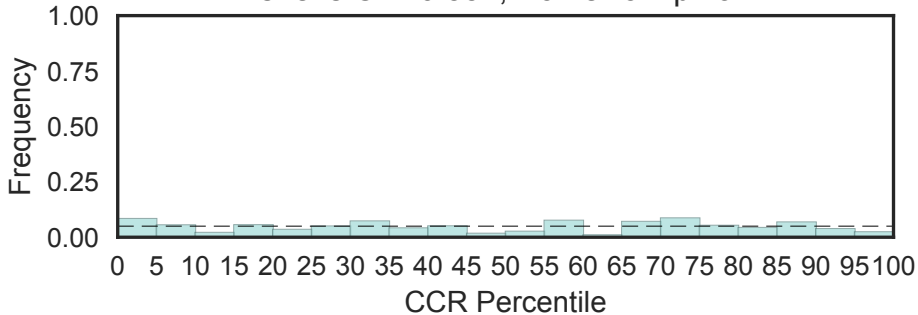

Avian adenovirus fibre, N-terminal  
(Av\_adeno\_fibre, N=1)

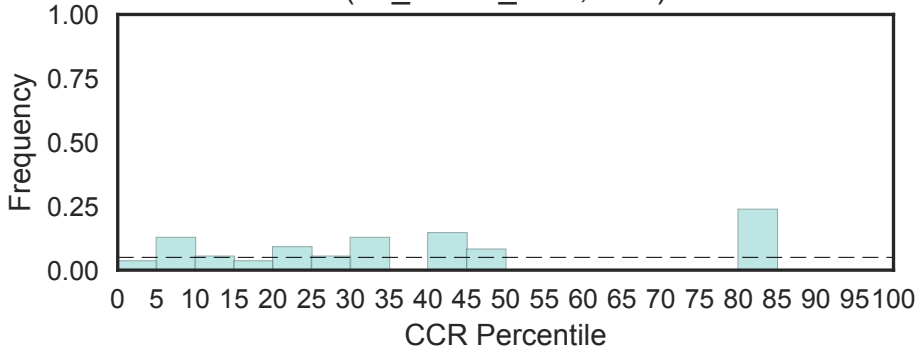



# Transport protein Avl9

(Avl9, N=4)

Fisher's OR: 0; Bonferroni p-val: 1

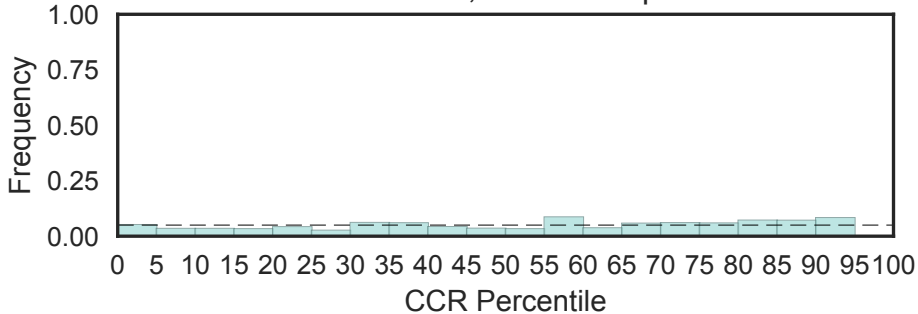

Axonemal dynein light chain  
(Ax\_dynein\_light, N=2)

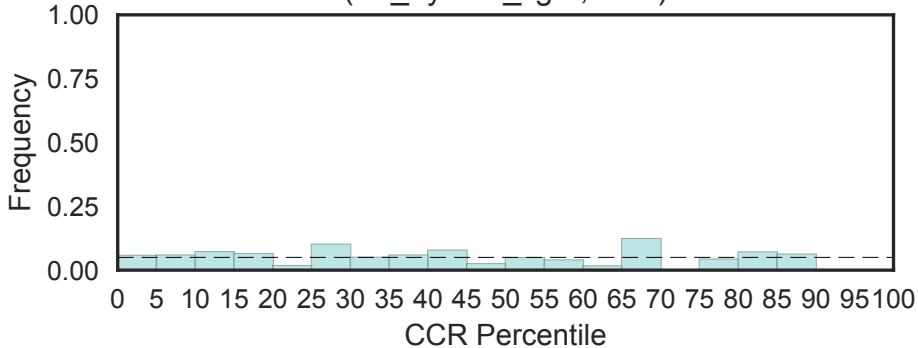

Axin beta-catenin binding domain  
(Axin\_b-cat\_bind, N=2)

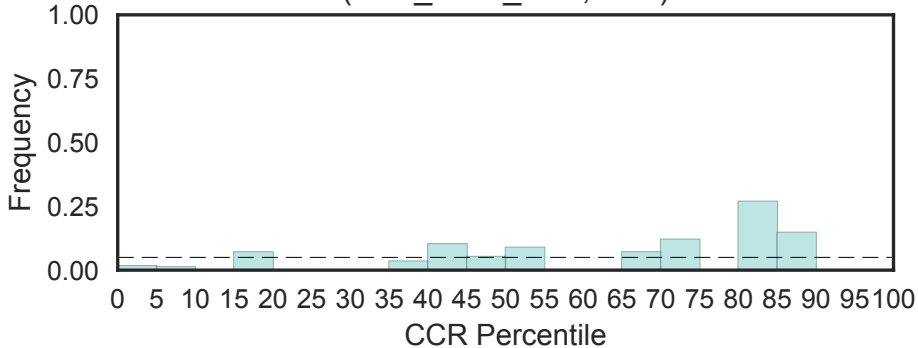

B-block binding subunit of TFIIIC  
(B-block\_TFIIIC, N=1)

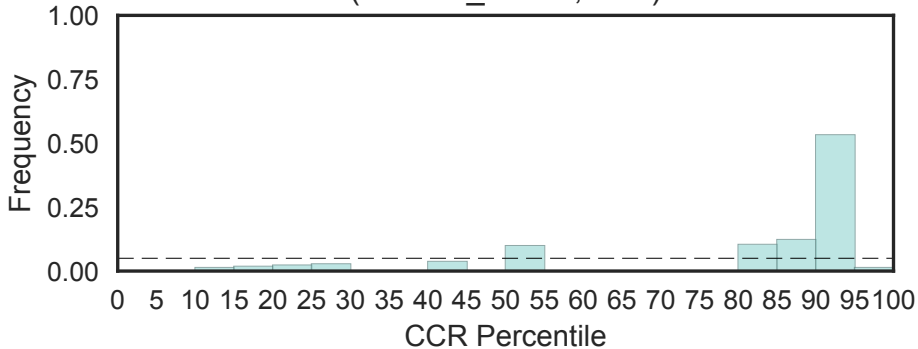

B12 binding domain  
(B12-binding, N=2)

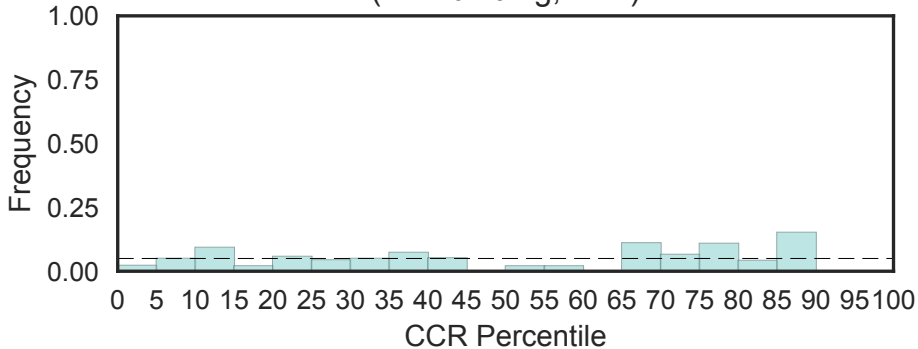

B12 binding domain  
(B12-binding\_2, N=1)

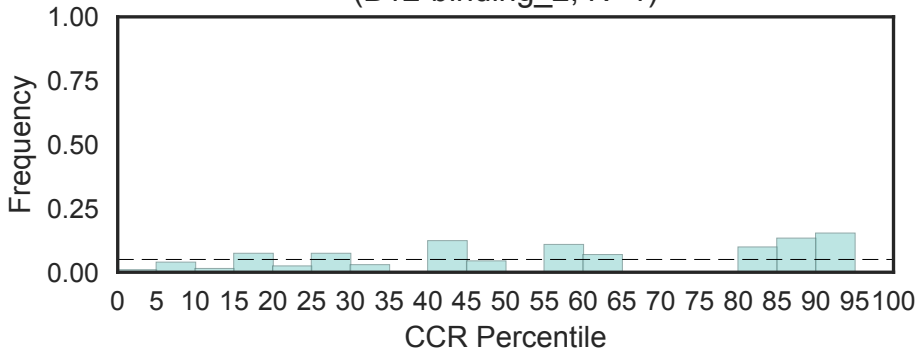

NADH-ubiquinone reductase complex 1 MLRQ subunit  
(B12D, N=3)

Fisher's OR: 0; Bonferroni p-val: 1

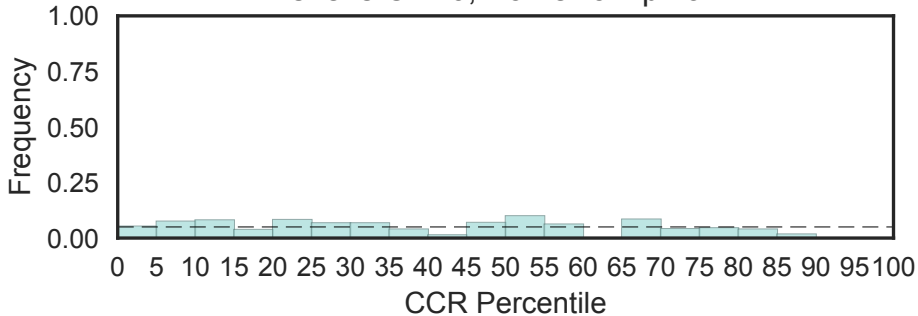

Beta2-adaptin appendage, C-terminal sub-domain  
(B2-adapt-app\_C, N=3)

Fisher's OR: 2.25; Bonferroni p-val: 1

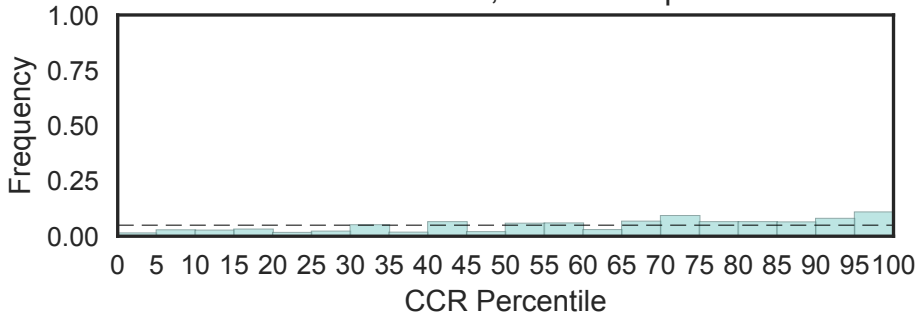



B3/4 domain  
(B3\_4, N=2)

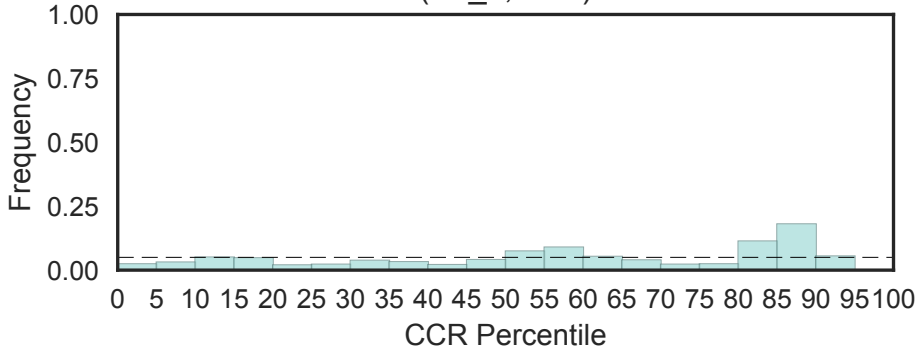

tRNA synthetase B5 domain  
(B5, N=1)

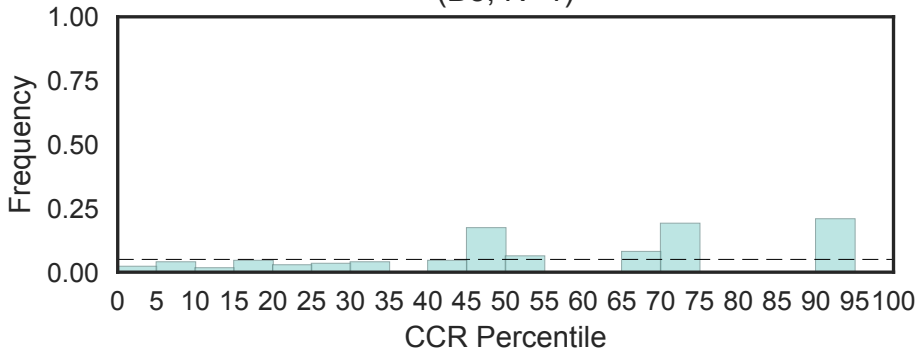

Protein phosphatase 2A regulatory B subunit (B56 family)  
(B56, N=5)

Fisher's OR: 5.71; Bonferroni p-val: 2.57e-07

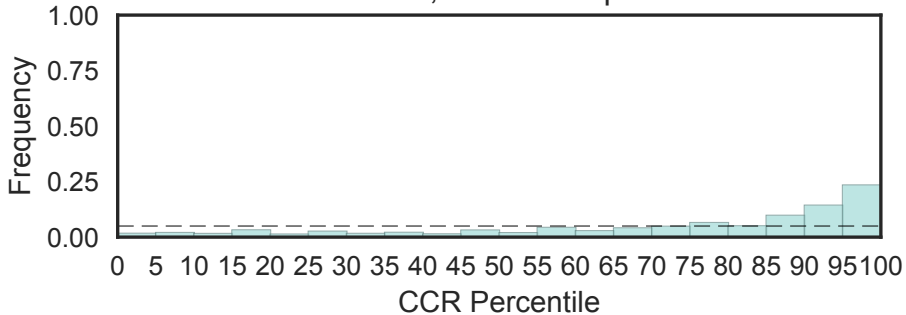

Ciliary basal body-associated, B9 protein  
(B9-C2, N=3)

Fisher's OR: 0; Bonferroni p-val: 1

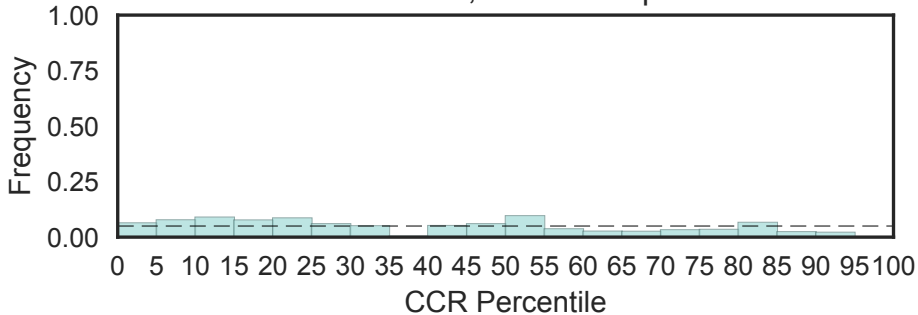

BAALC N-terminus  
(BAALC\_N, N=1)

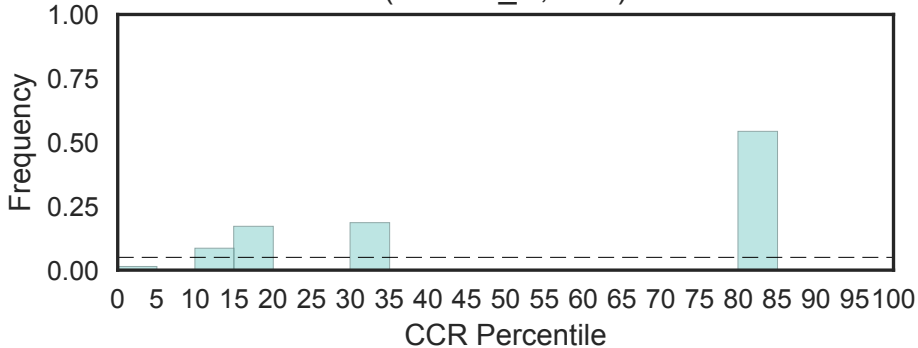

BAAT / Acyl-CoA thioester hydrolase C terminal  
(BAAT\_C, N=6)

Fisher's OR: 0.424; Bonferroni p-val: 1

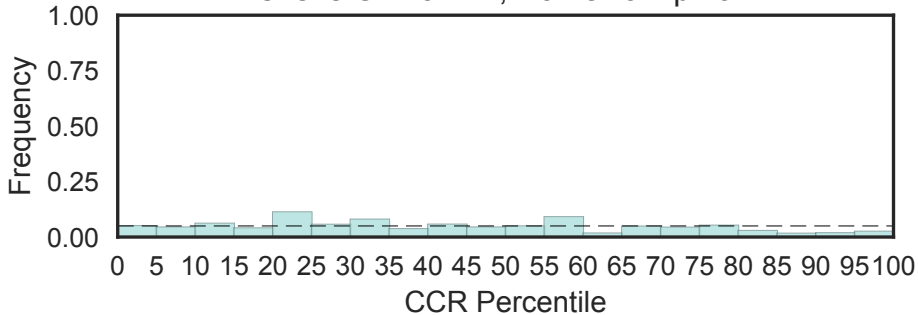

BTB And C-terminal Kelch  
(BACK, N=58)

Fisher's OR: 0.833; Bonferroni p-val: 1

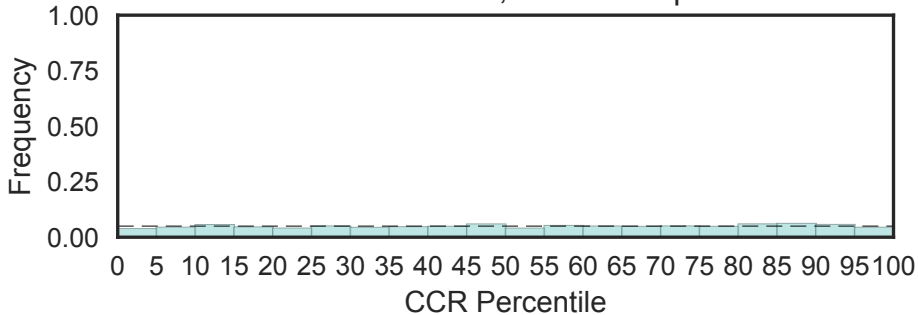

# Barrier to autointegration factor (BAF, N=2)

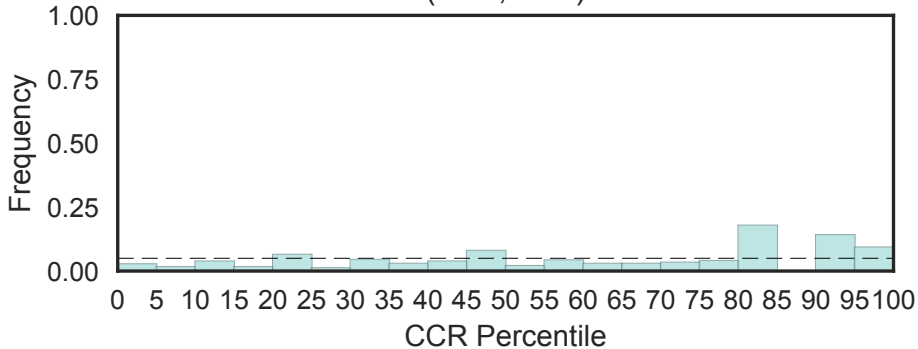



SWI/SNF-like complex subunit BAF250/Osa  
(BAF250\_C, N=2)

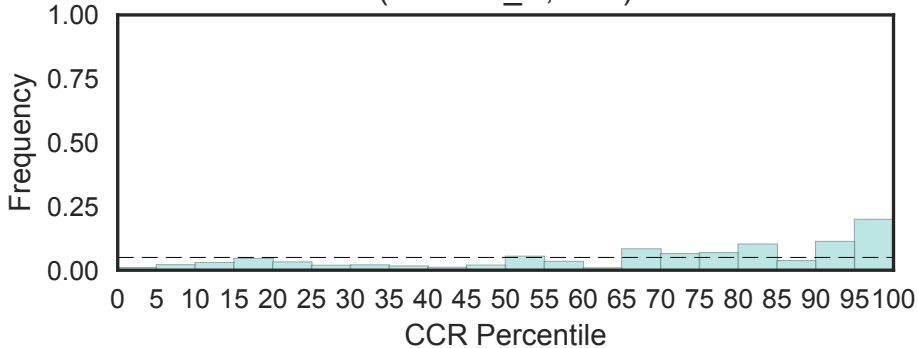

BAG domain  
(BAG, N=7)

Fisher's OR: 0; Bonferroni p-val: 1

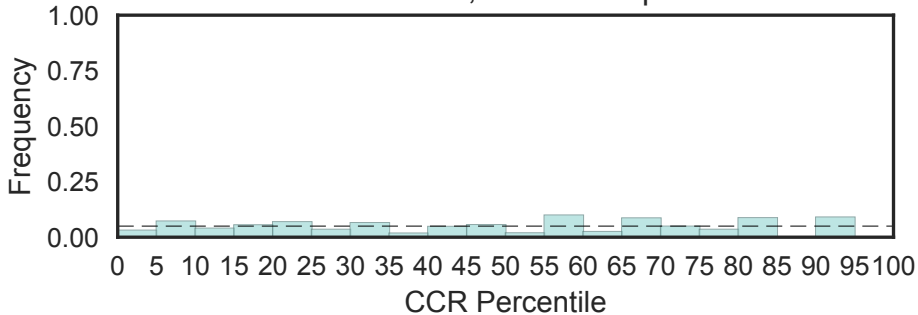

BAH domain  
(BAH, N=14)

Fisher's OR: 4.85; Bonferroni p-val: 0.00149

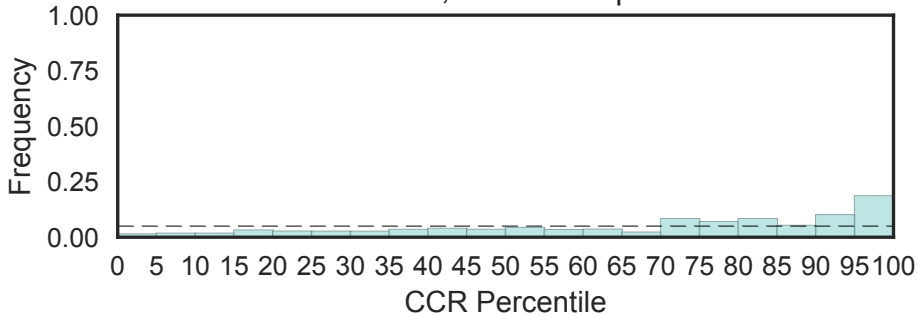

# BMP and activin membrane-bound inhibitor (BAMBI) N-terminal domain (BAMBI, N=1)

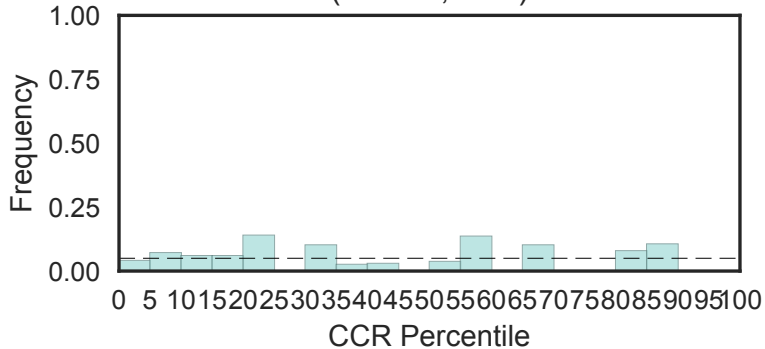

BAR domain  
(BAR, N=16)

Fisher's OR: 1.35; Bonferroni p-val: 1

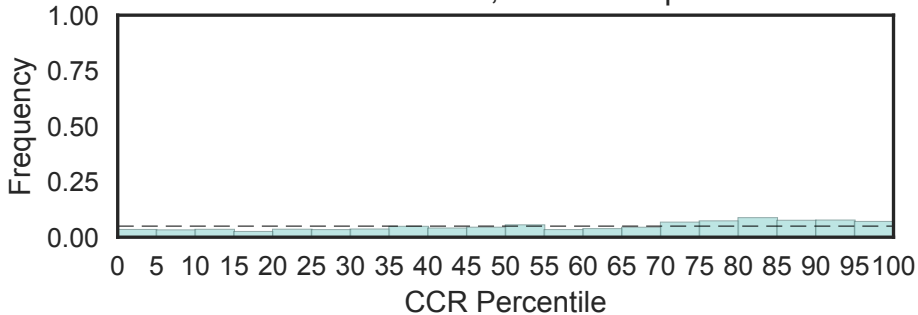

Bin/amphiphysin/Rvs domain for vesicular trafficking  
(BAR\_2, N=4)

Fisher's OR: 0.549; Bonferroni p-val: 1

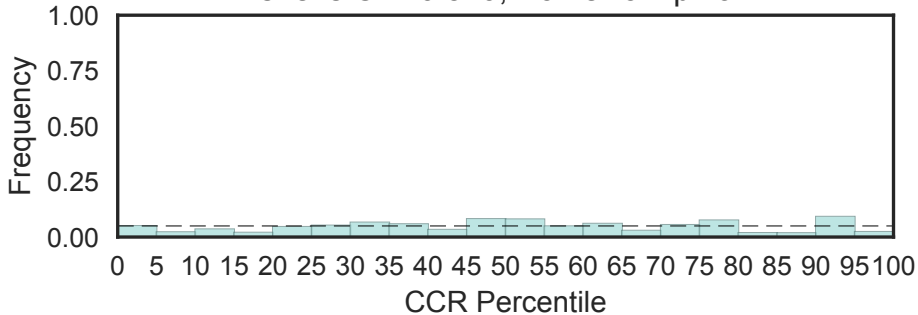

BAR domain of APPL family  
(BAR\_3, N=12)

Fisher's OR: 1.25; Bonferroni p-val: 1

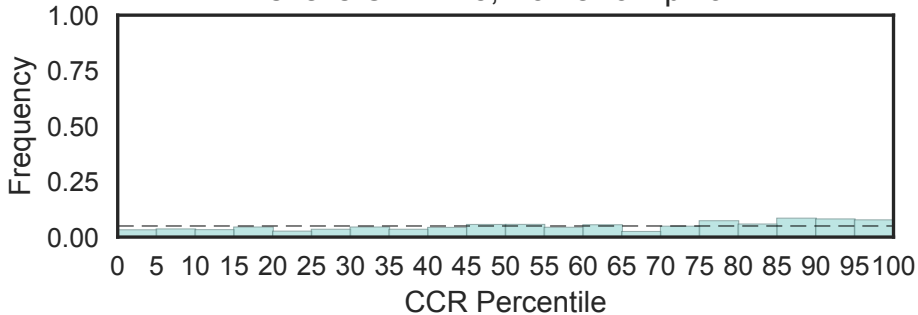

WASP-binding domain of Sorting nexin protein  
(BAR\_3\_WASP\_bdg, N=3)

Fisher's OR: 0.393; Bonferroni p-val: 1

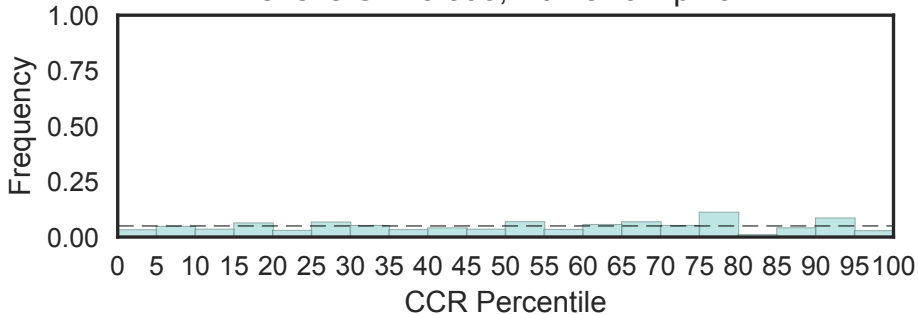



Brain acid soluble protein 1 (BASP1 protein)  
(BASP1, N=1)

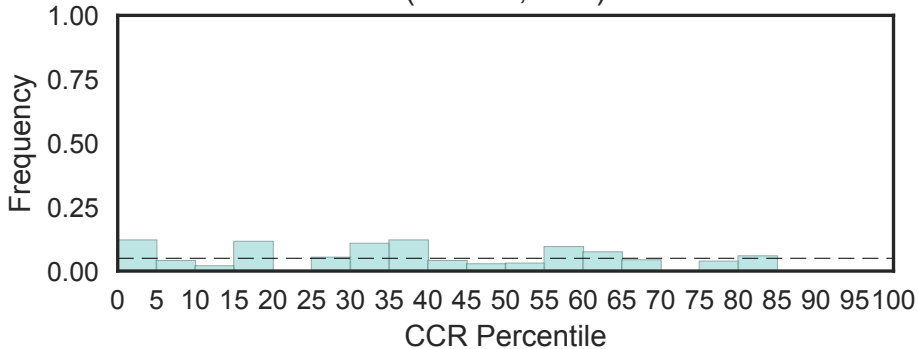

BAT2 N-terminus  
(BAT2\_N, N=3)

Fisher's OR: 4.6; Bonferroni p-val: 1

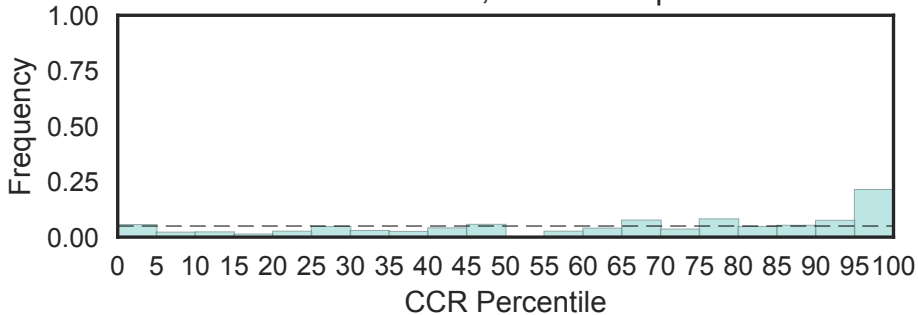

Cilia BBSome complex subunit 10  
(BBIP10, N=1)

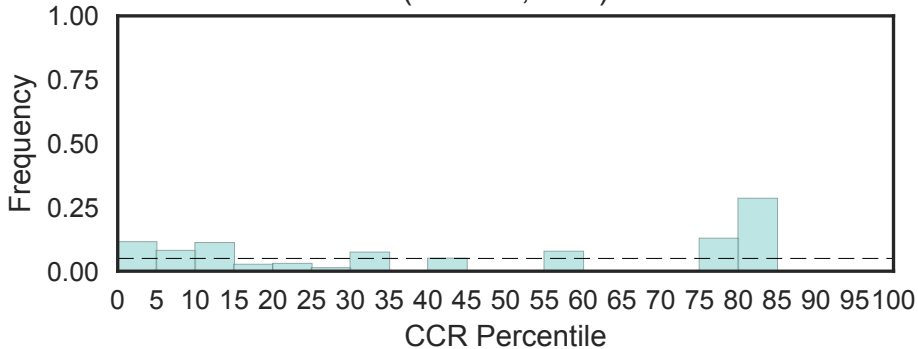

Bardet-Biedl syndrome 5 protein  
(BBL5, N=3)

Fisher's OR: 1.15; Bonferroni p-val: 1

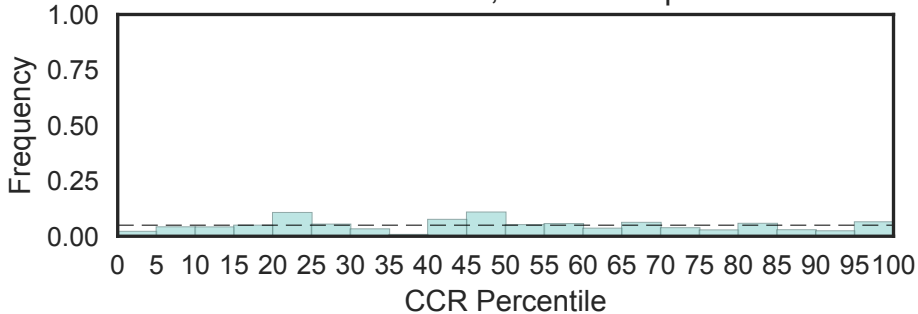

Ciliary BBSome complex subunit 1  
(BBS1, N=2)

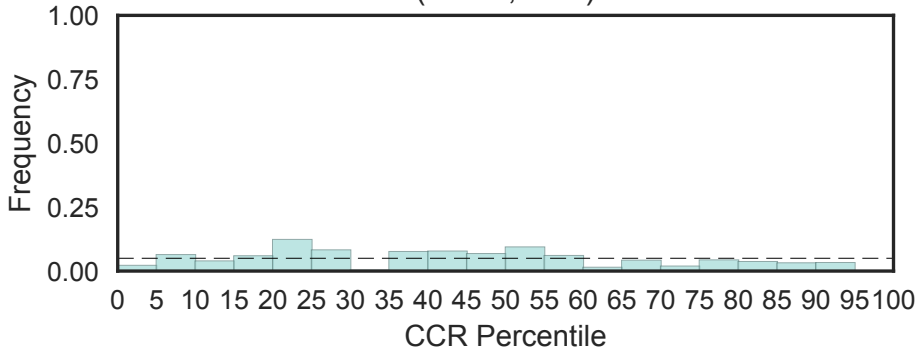

Ciliary BBSome complex subunit 2, C-terminal  
(BBS2\_C, N=1)

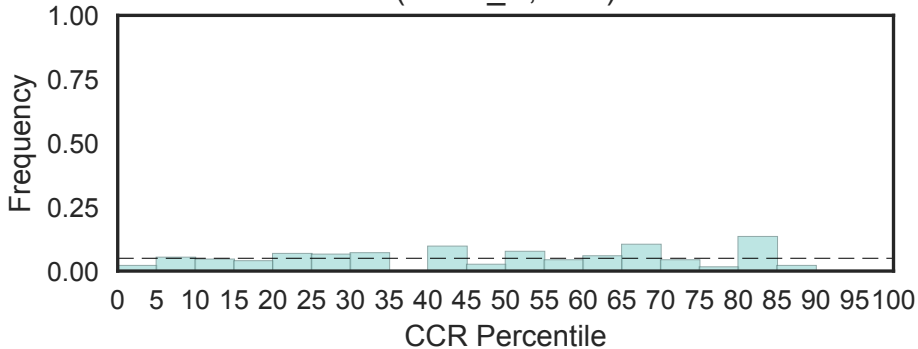

Ciliary BBSome complex subunit 2, middle region  
(BBS2\_Mid, N=1)

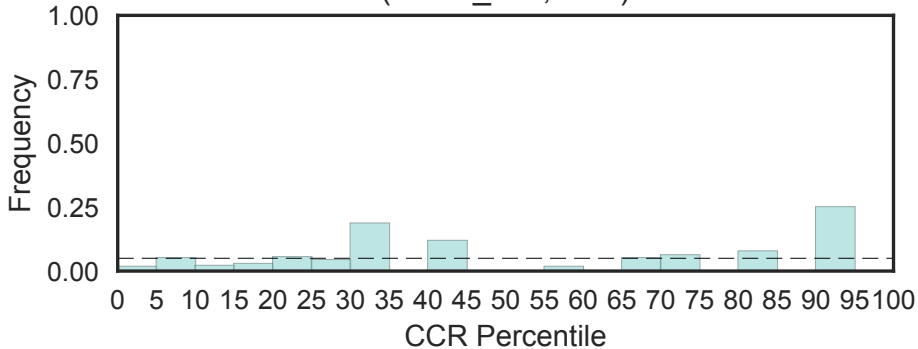

Ciliary BBSome complex subunit 2, N-terminal  
(BBS2\_N, N=1)

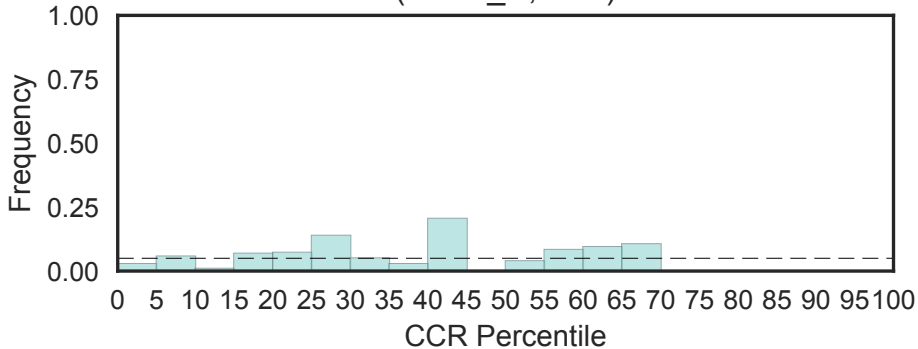



# Bladder cancer-related protein BC10 (BC10, N=1)

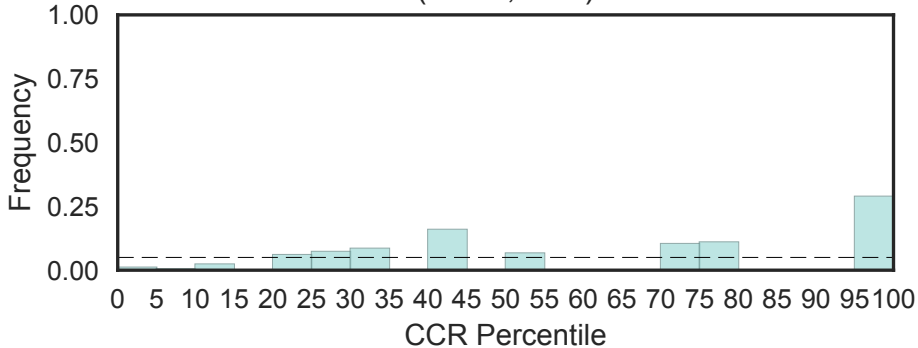

Breast carcinoma amplified sequence 2 (BCAS2)  
(BCAS2, N=1)

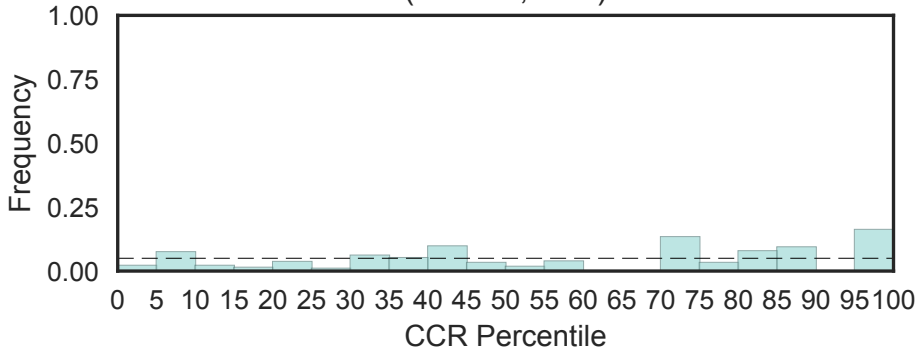

Breast carcinoma amplified sequence 3  
(BCAS3, N=1)

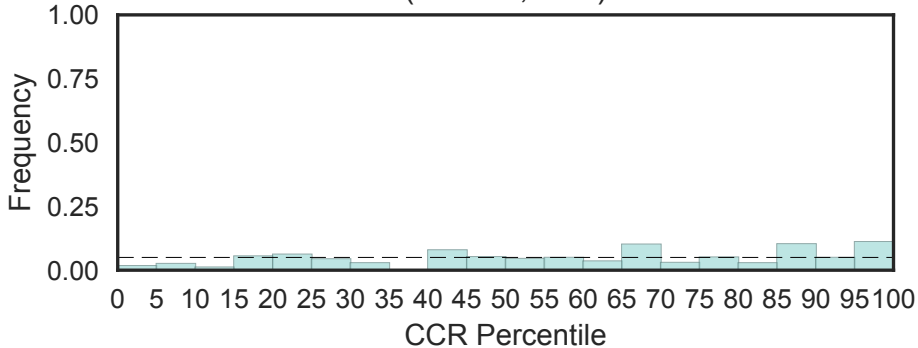

Mitochondrial branched-chain alpha-ketoacid dehydrogenase kinase  
(BCDHK\_Adom3, N=4)

Fisher's OR: 0; Bonferroni p-val: 1

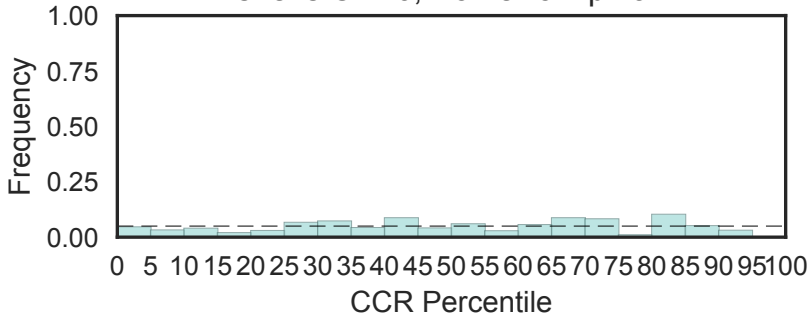

p21-C-terminal region-binding protein  
(BCIP, N=1)

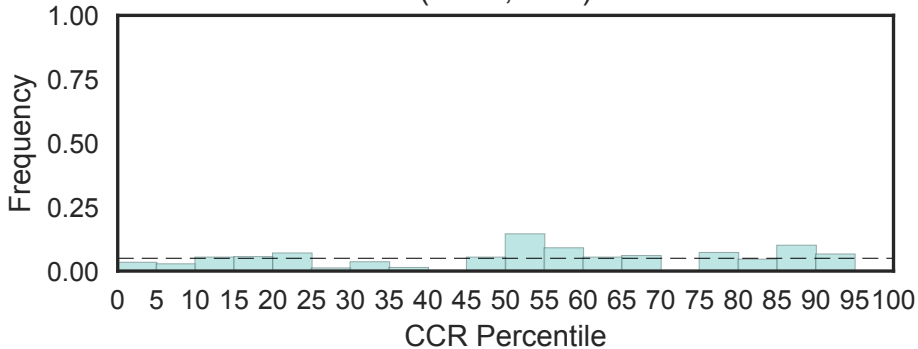

B-cell lymphoma 9 protein  
(BCL9, N=2)

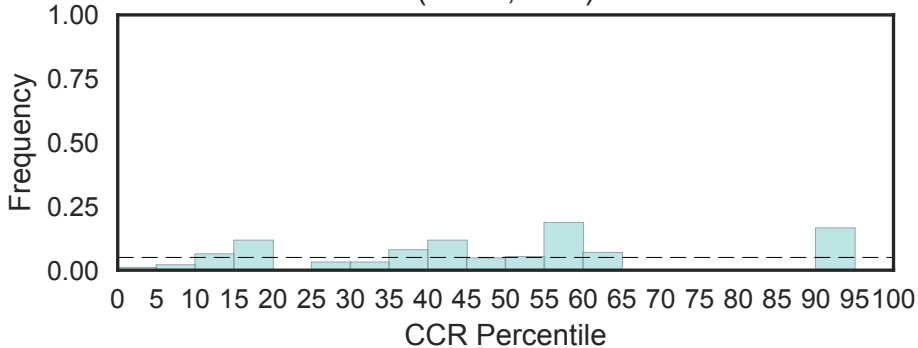

Beta-casein like protein  
(BCLP, N=2)

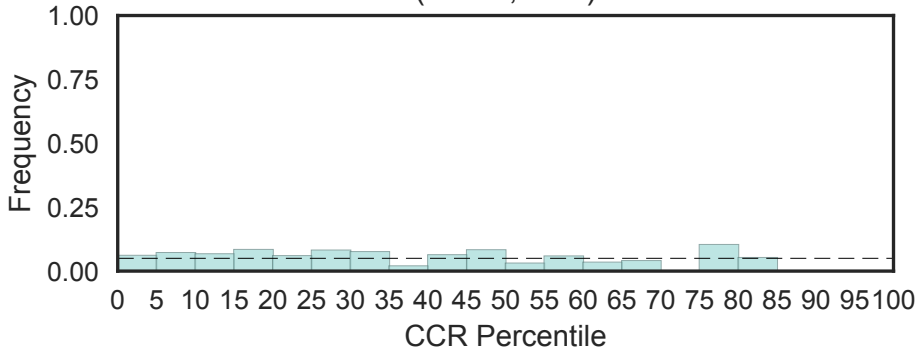

BCL7, N-terminal conserved region  
(BCL\_N, N=3)

Fisher's OR: 0; Bonferroni p-val: 1

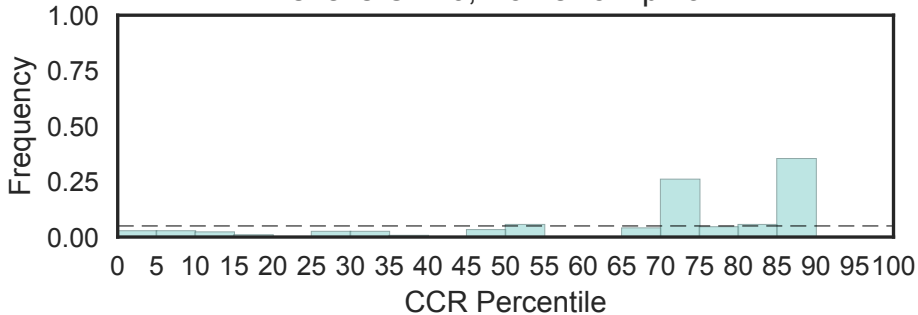



BCMA, TALL-1 binding  
(BCMA-Tall\_bind, N=1)

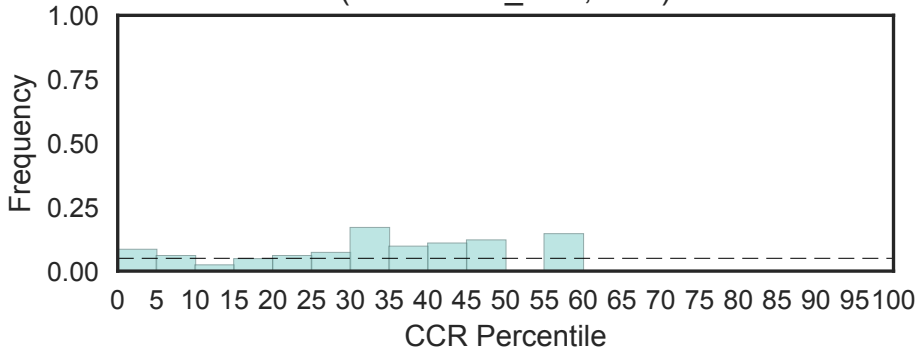

BCS1 N terminal  
(BCS1\_N, N=1)

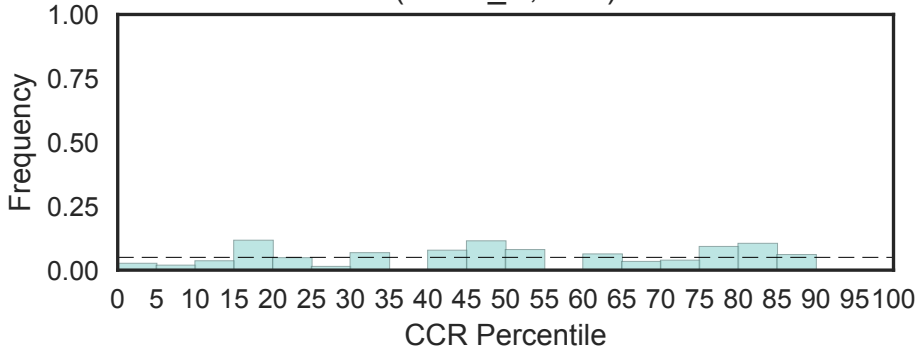

BDHCT (NUC031) domain  
(BDHCT, N=1)

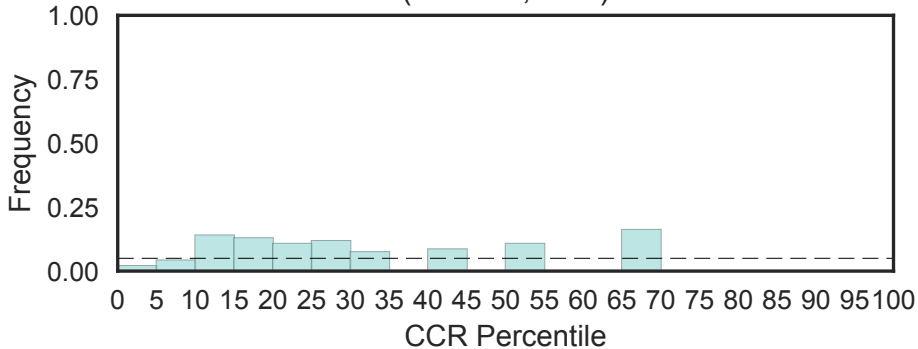

BDHCT-box associated domain on Bloom syndrome protein  
(BDHCT\_assoc, N=1)

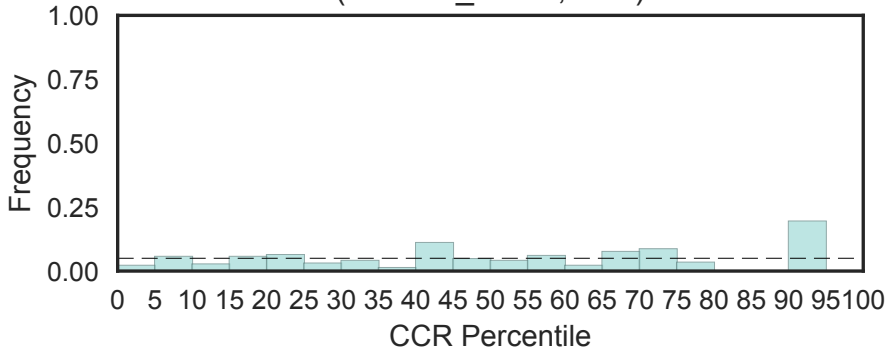

Borna disease virus P40 protein  
(BDV\_P40, N=2)

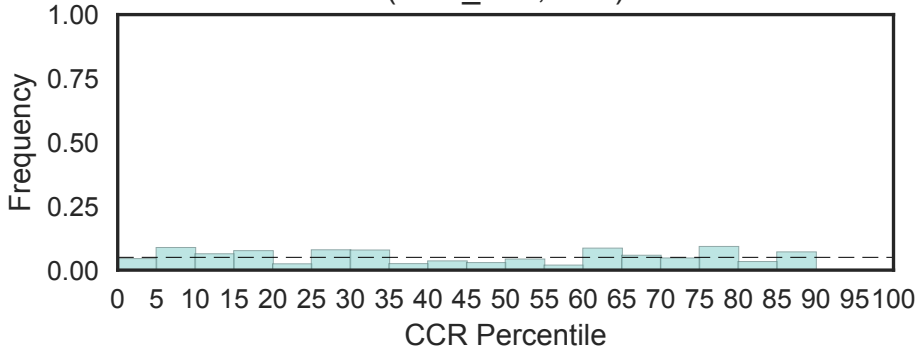

BEN domain  
(BEN, N=11)

Fisher's OR: 4.18; Bonferroni p-val: 1

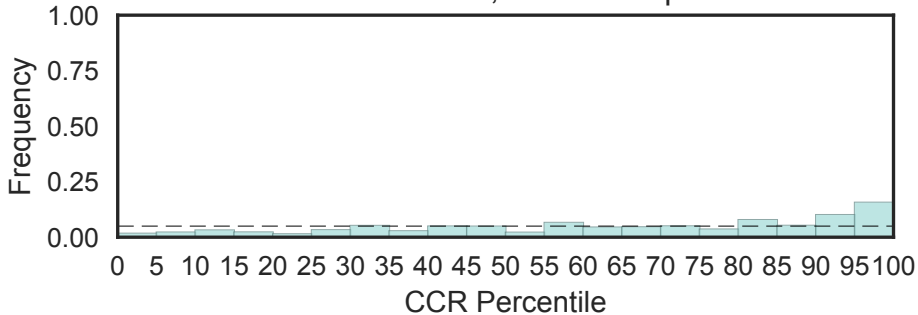

Bromodomain extra-terminal - transcription regulation  
(BET, N=4)

Fisher's OR: 4.7; Bonferroni p-val: 1

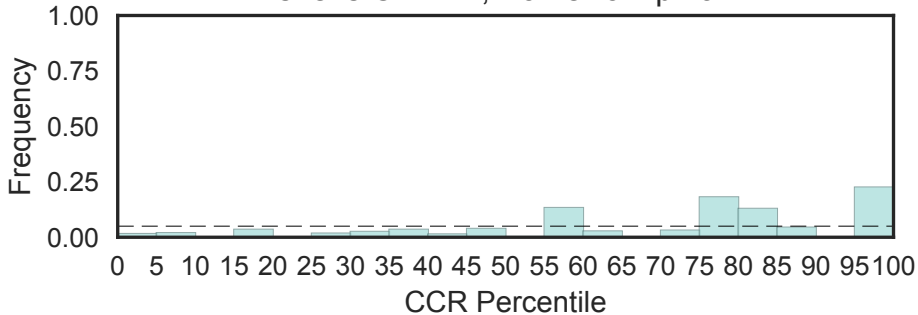

Beclin-1 BH3 domain, Bcl-2-interacting  
(BH3, N=1)

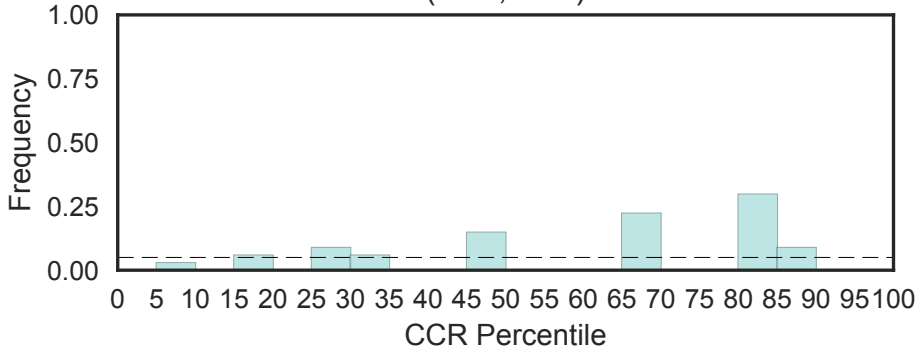



Bcl-2 homology region 4  
(BH4, N=4)

Fisher's OR: 0; Bonferroni p-val: 1

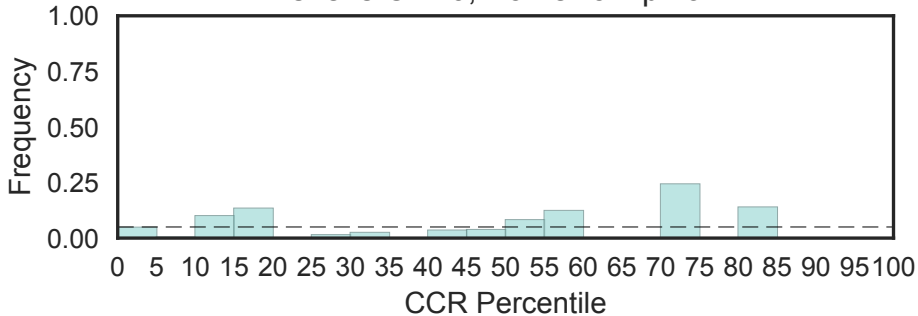

Rad4 beta-hairpin domain 1  
(BHD\_1, N=1)

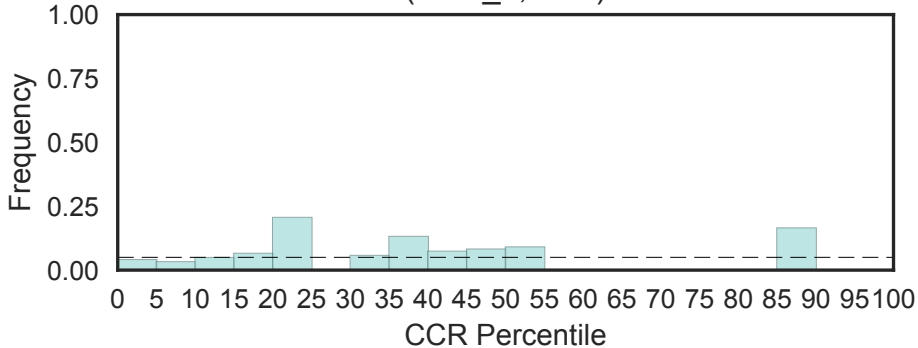

Rad4 beta-hairpin domain 2  
(BHD\_2, N=1)

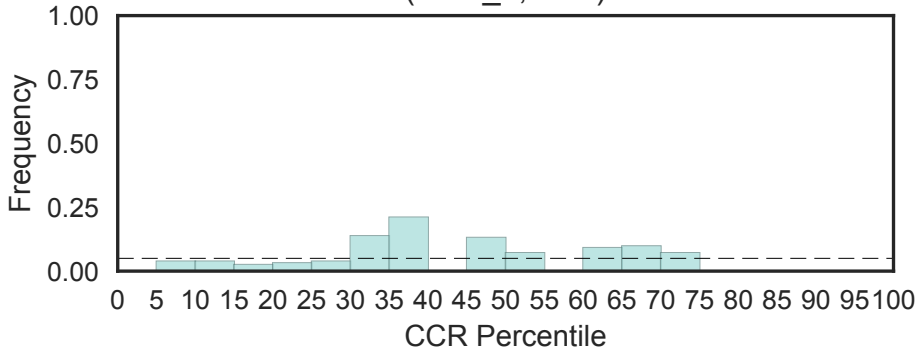

Rad4 beta-hairpin domain 3  
(BHD\_3, N=1)

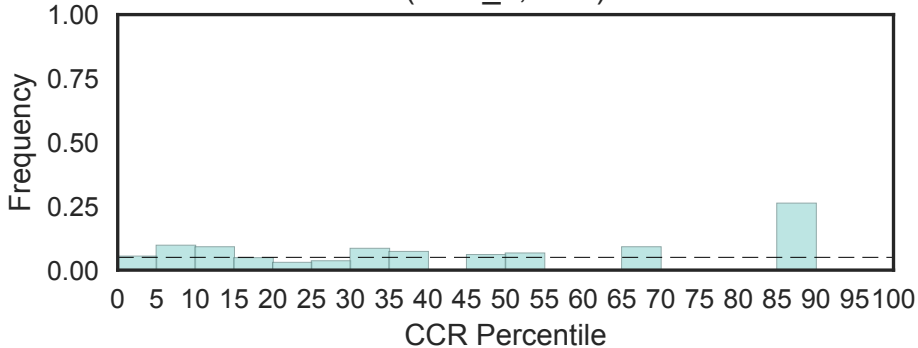

BH3 interacting domain (BID)  
(BID, N=1)

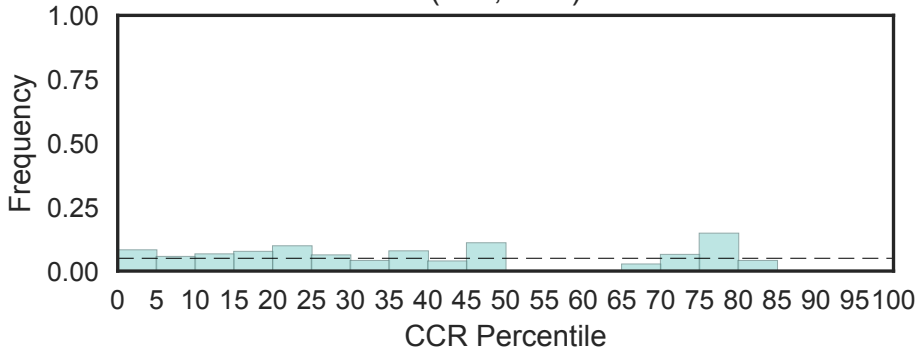

Inhibitor of Apoptosis domain  
(BIR, N=14)

Fisher's OR: 2.21; Bonferroni p-val: 1

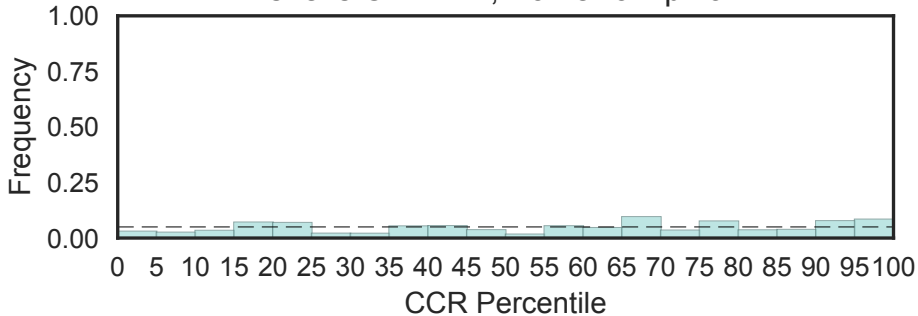

Baculoviral IAP repeat-containing protein 6  
(BIRC6, N=1)

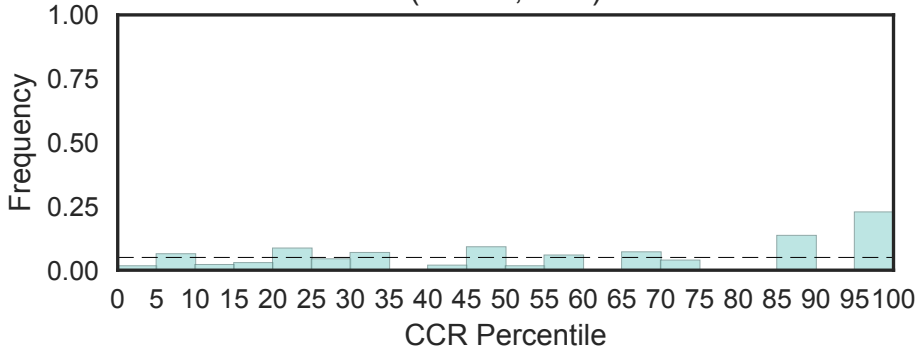

Calcium-activated BK potassium channel alpha subunit  
(BK\_channel\_a, N=4)

Fisher's OR: 2.98; Bonferroni p-val: 1

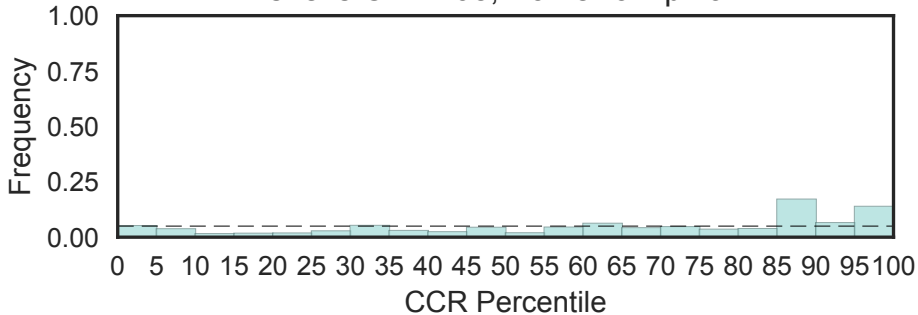



Proteasome-substrate-size regulator, mid region  
(BLM10\_mid, N=1)

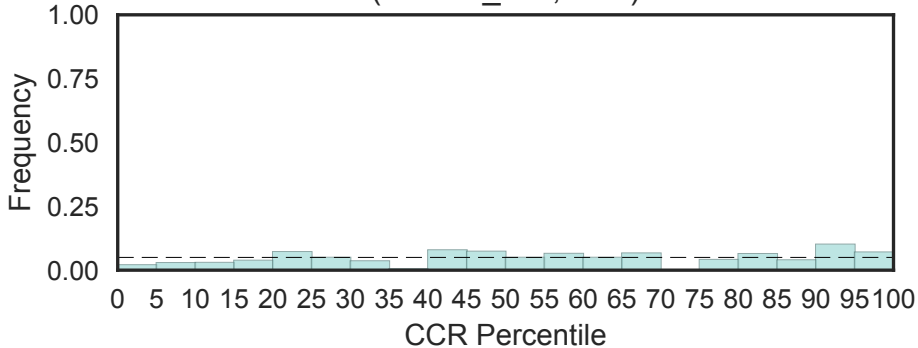

N-terminal region of Bloom syndrome protein  
(BLM\_N, N=1)

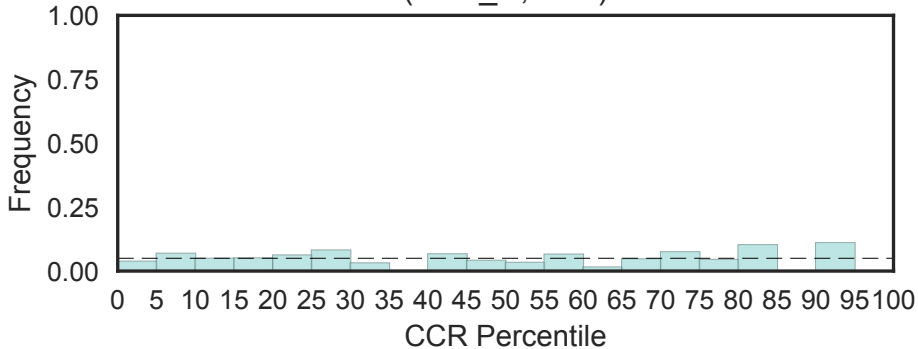

# Biogenesis of lysosome-related organelles complex 1 subunit 3 (BLOC1S3, N=1)

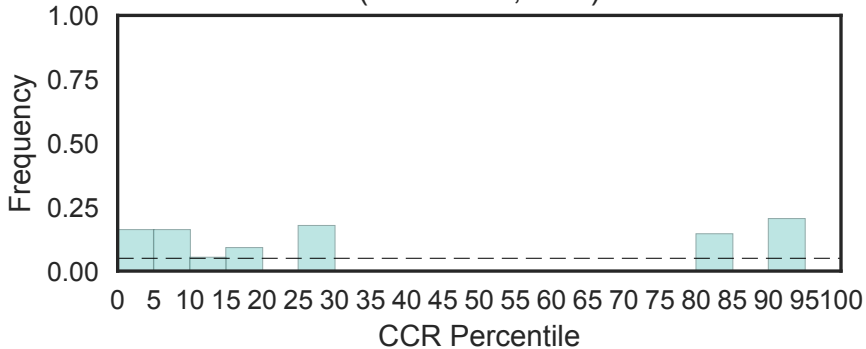

# Biogenesis of lysosome-related organelles complex-1 subunit 2 (BLOC1\_2, N=1)

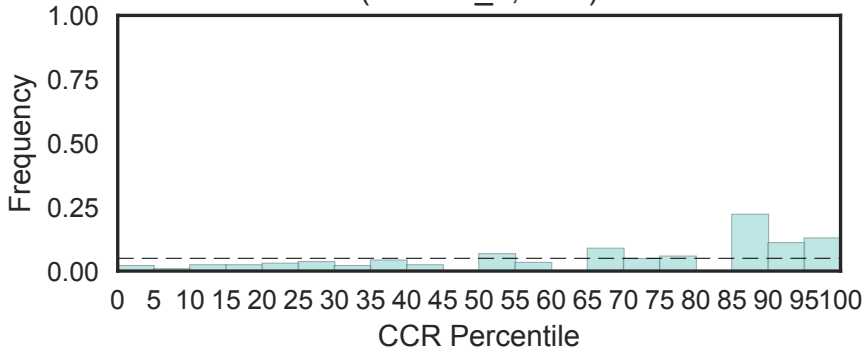

Bcl-2-modifying factor, apoptosis  
(BMF, N=2)

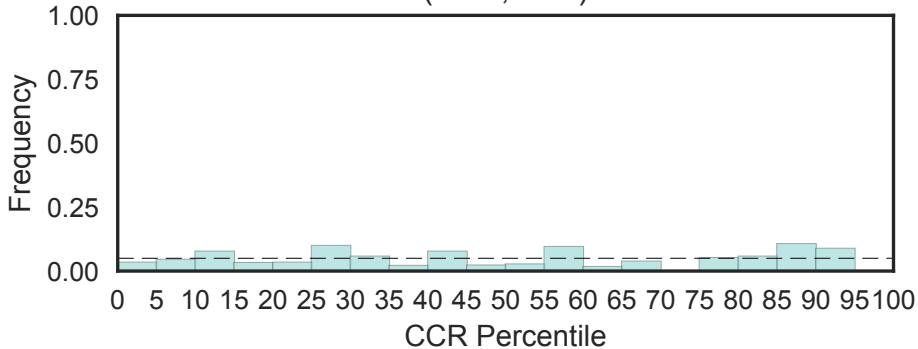

Bcl2-/adenovirus E1B nineteen kDa-interacting protein 2  
(BNIP2, N=4)

Fisher's OR: 0.51; Bonferroni p-val: 1

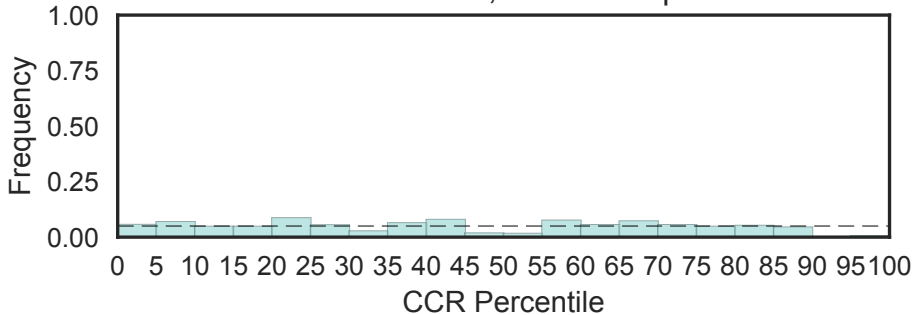

# BNIP3 (BNIP3, N=2)

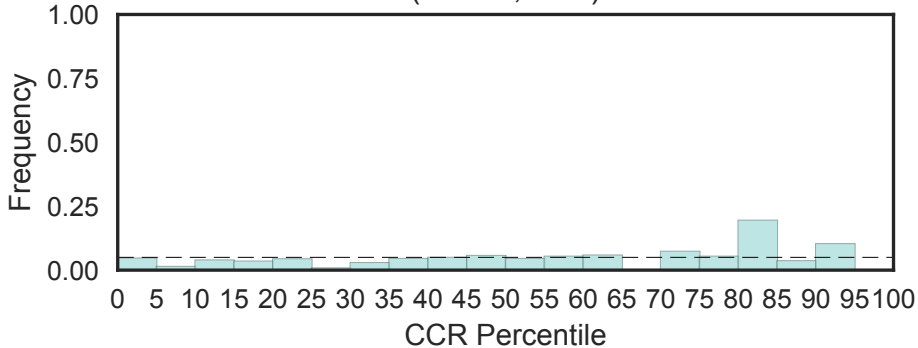

BNR/Asp-box repeat  
(BNR, N=1)

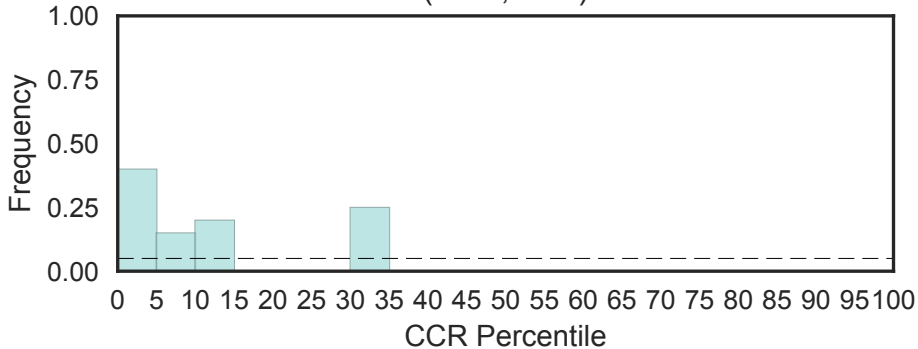



BNR repeat-like domain

(BNR\_2, N=4)

Fisher's OR: 0; Bonferroni p-val: 1

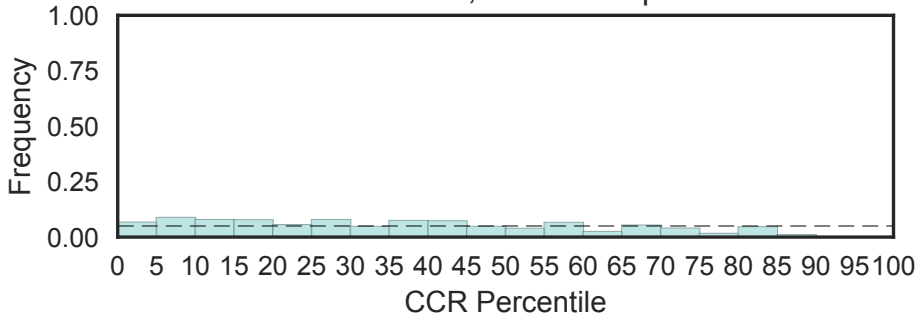

BNR-Asp box repeat

(BNR\_6, N=8)

Fisher's OR: 0; Bonferroni p-val: 1

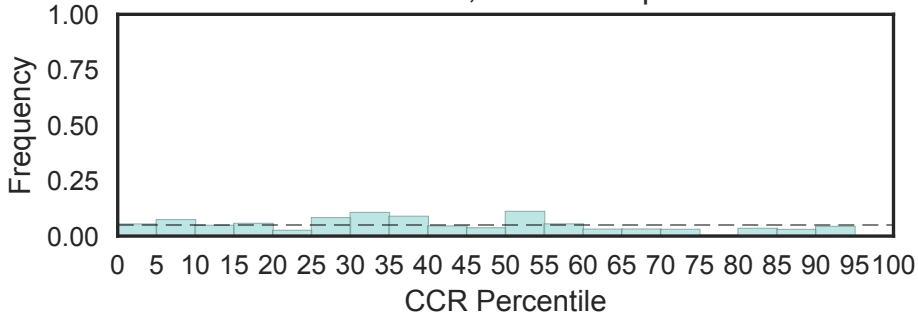

Protein aurora borealis N-terminus  
(BORA\_N, N=1)

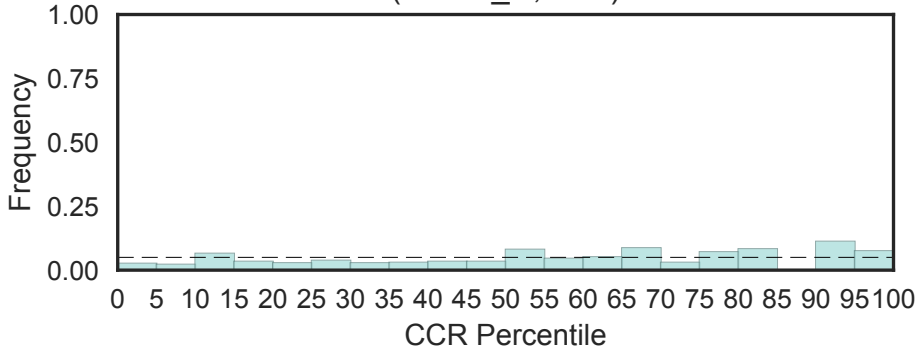

BLOC-1-related complex sub-unit 6  
(BORCS6, N=1)

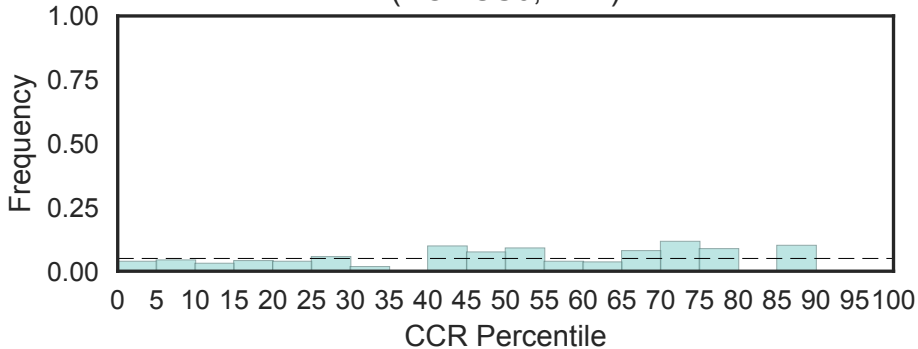

BLOC-1-related complex sub-unit 7  
(BORCS7, N=1)

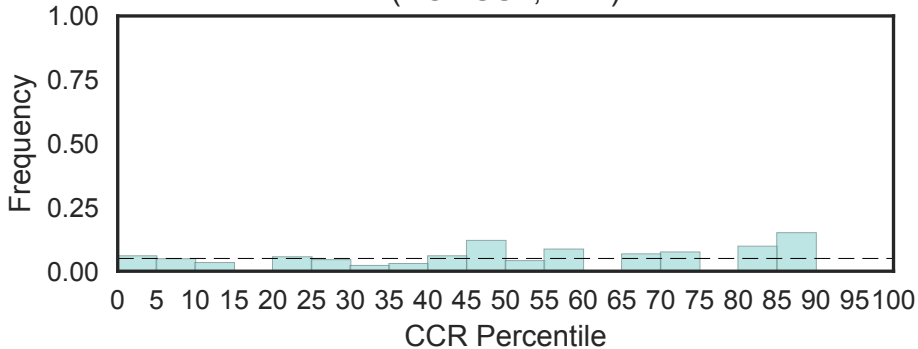

BLOC-1-related complex sub-unit 8  
(BORCS8, N=2)

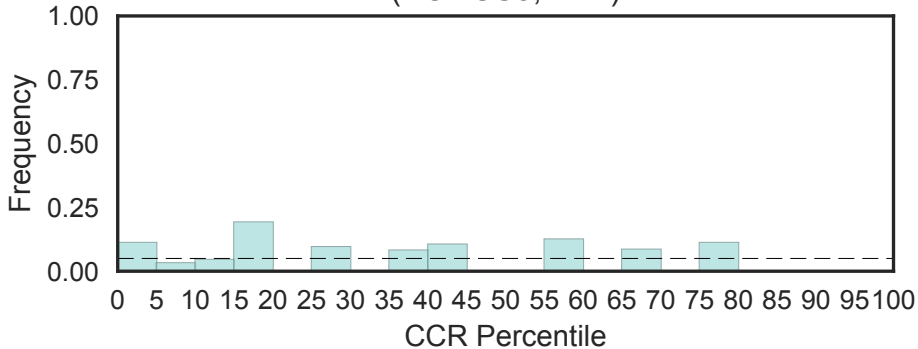

Cdc42 effector  
(BORG\_CEP, N=5)  
Fisher's OR: 0; Bonferroni p-val: 1

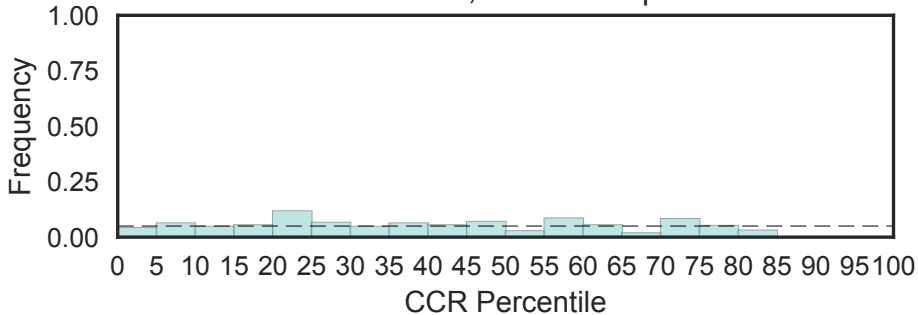

BP28CT (NUC211) domain  
(BP28CT, N=1)

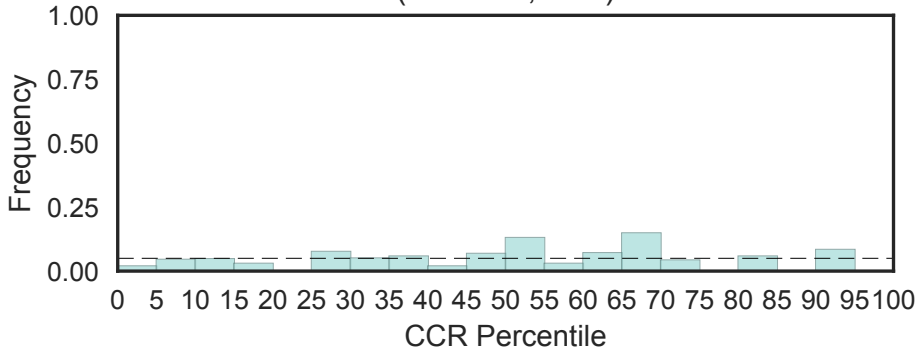



Biotin protein ligase C terminal domain  
(BPL\_C, N=1)

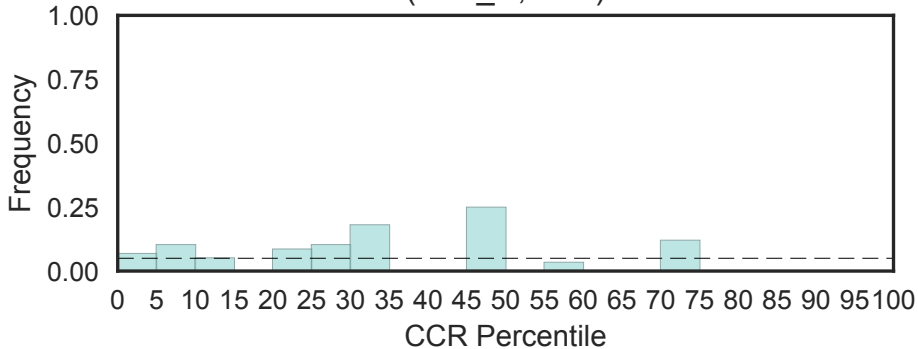

Biotin/lipoate A/B protein ligase family  
(BPL\_LpIA\_LipB, N=2)

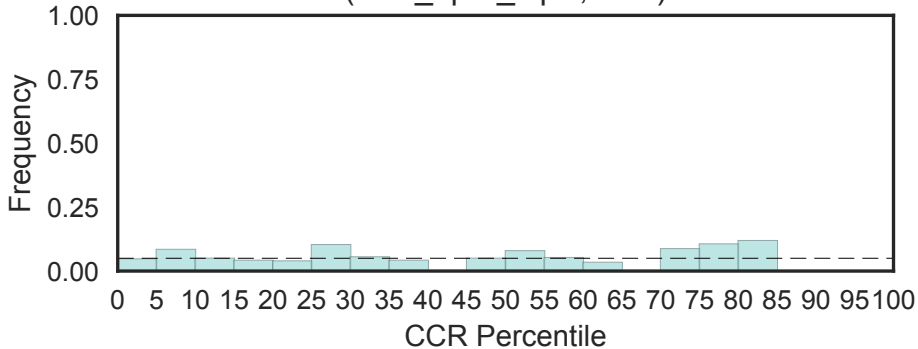

Biotin-protein ligase, N terminal  
(BPL\_N, N=1)

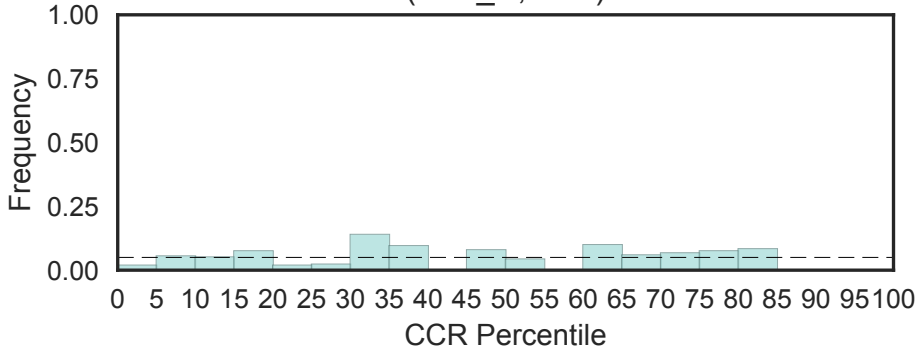

BPS (Between PH and SH2)  
(BPS, N=3)

Fisher's OR: 2.25; Bonferroni p-val: 1

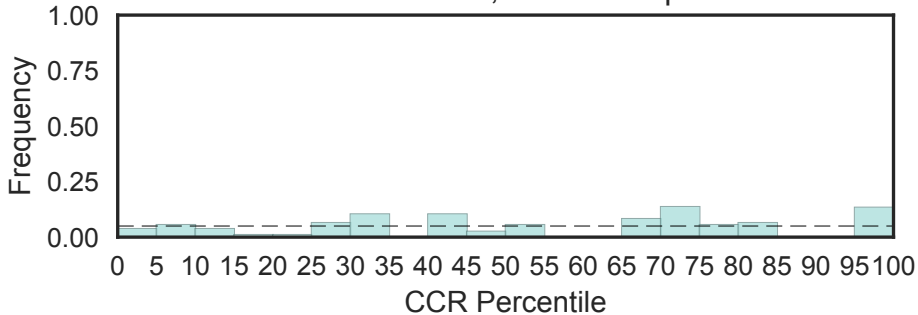

BRCA1-associated protein 2  
(BRAP2, N=1)

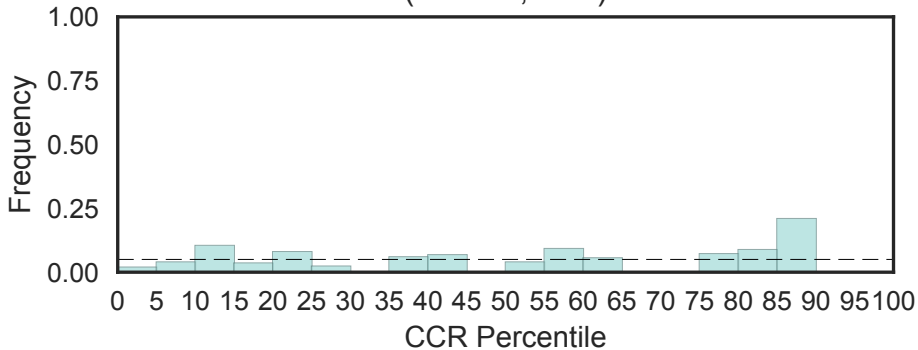

BRCA2, oligonucleotide/oligosaccharide-binding, domain 1  
(BRCA-2\_OB1, N=1)

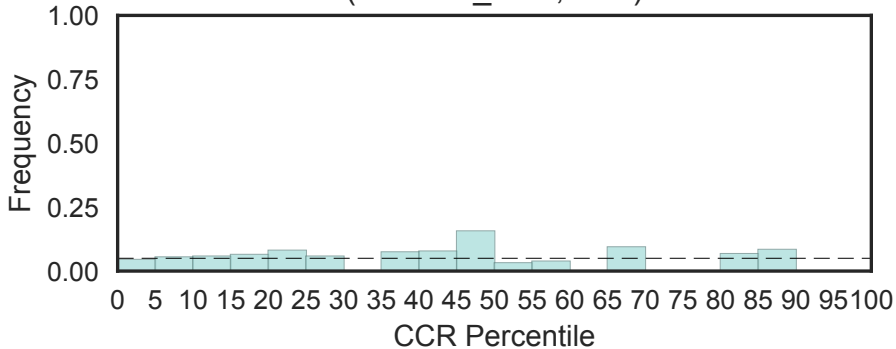

BRCA2, oligonucleotide/oligosaccharide-binding, domain 3  
(BRCA-2\_OB3, N=1)

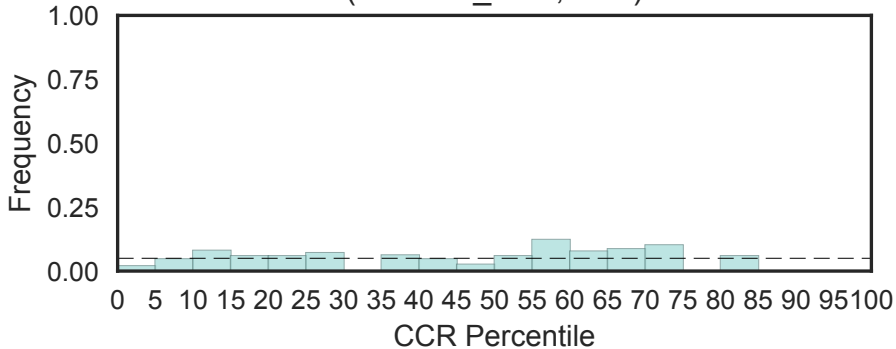

BRCA2, helical  
(BRCA-2\_helical, N=1)

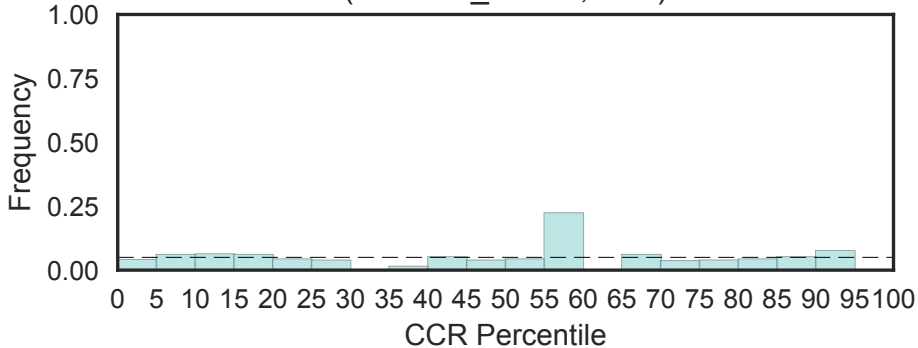



BRCA2 repeat  
(BRCA2, N=8)

Fisher's OR: 0; Bonferroni p-val: 1

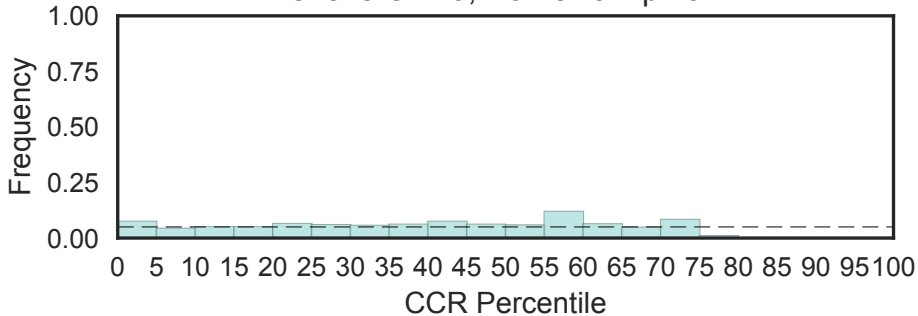

BRCA1 C Terminus (BRCT) domain  
(BRCT, N=24)

Fisher's OR: 1.67; Bonferroni p-val: 1

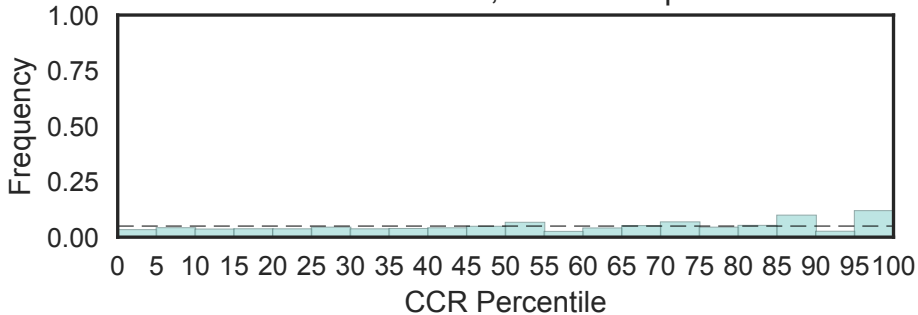

BRCT domain, a BRCA1 C-terminus domain  
(BRCT\_2, N=11)

Fisher's OR: 1.28; Bonferroni p-val: 1

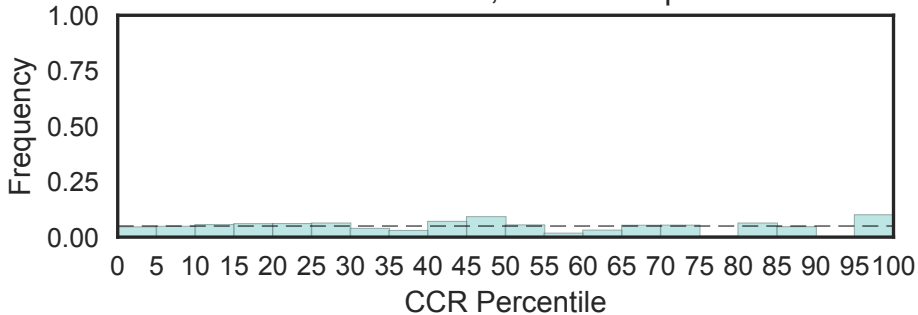

Serine-rich domain associated with BRCT  
(BRCT\_assoc, N=1)

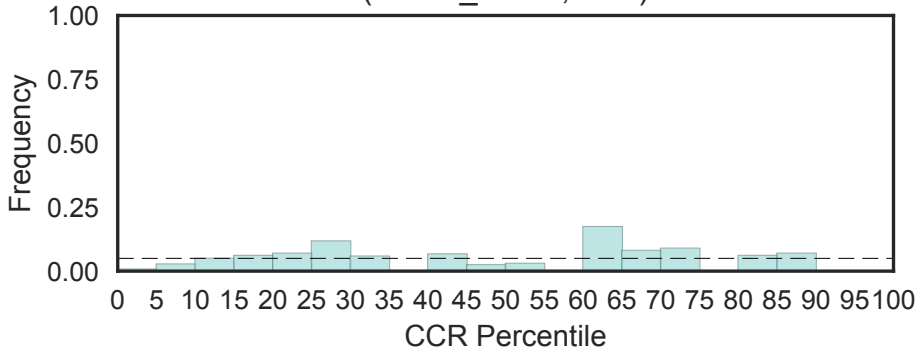

C-terminal domain of bromodomain protein 4  
(BRD4\_CDT, N=2)

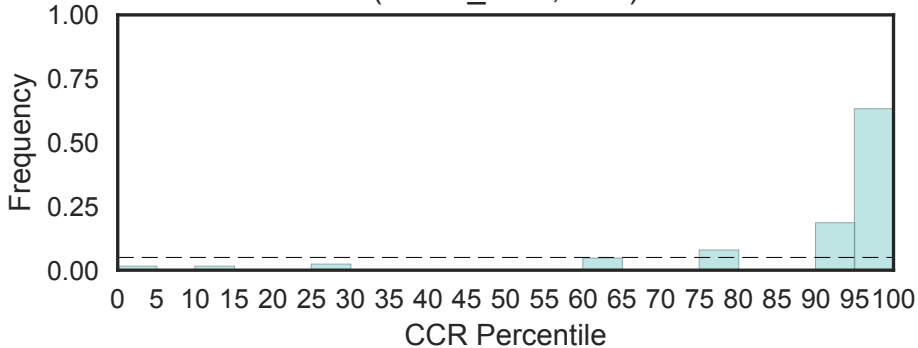

# Brain and reproductive organ-expressed protein (BRE) (BRE, N=1)

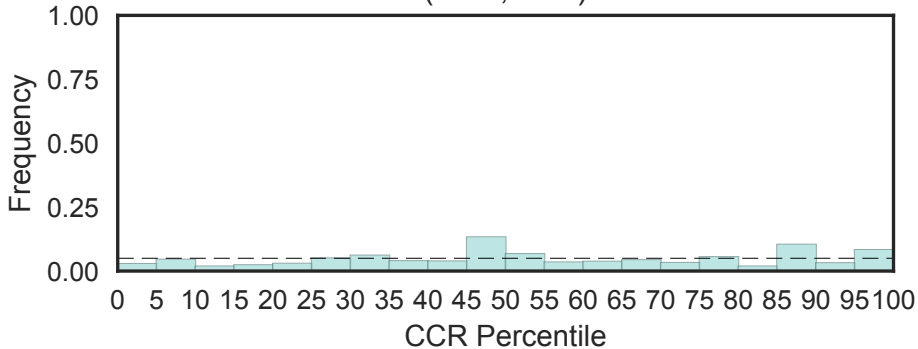

BRE1 E3 ubiquitin ligase  
(BRE1, N=1)

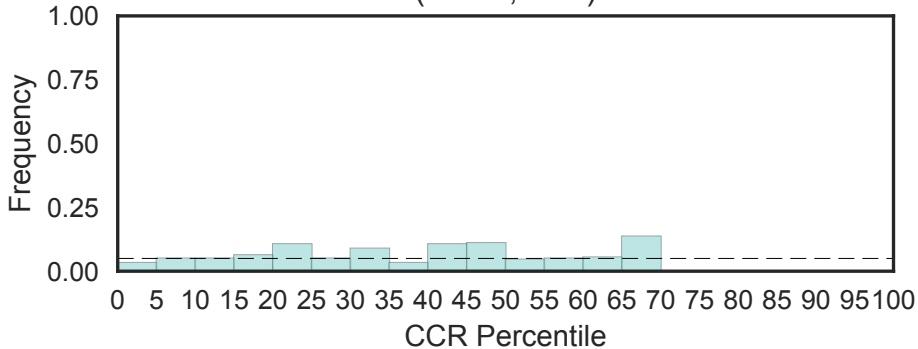

Brf1-like TBP-binding domain  
(BRF1, N=1)

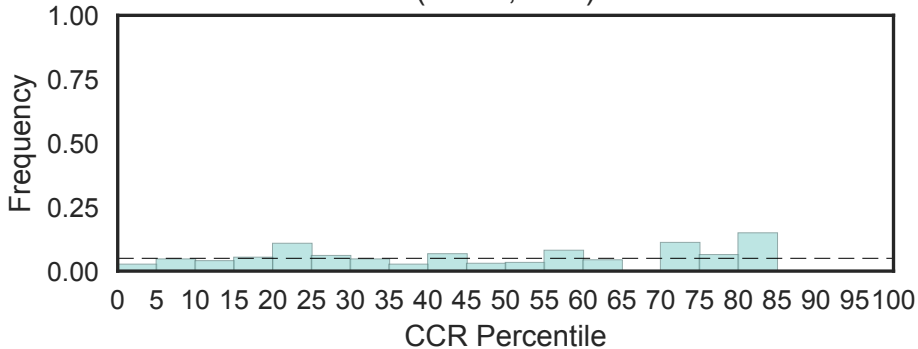



Negative regulator of p53/TP53  
(BRI3BP, N=2)

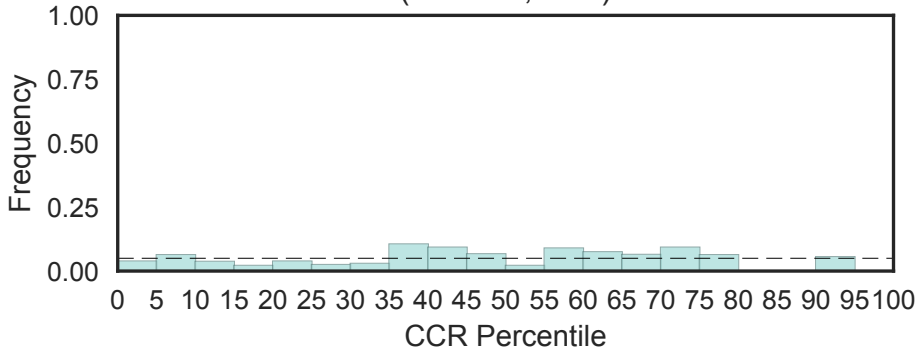

BRICHOS domain  
(BRICHOS, N=7)

Fisher's OR: 0.342; Bonferroni p-val: 1

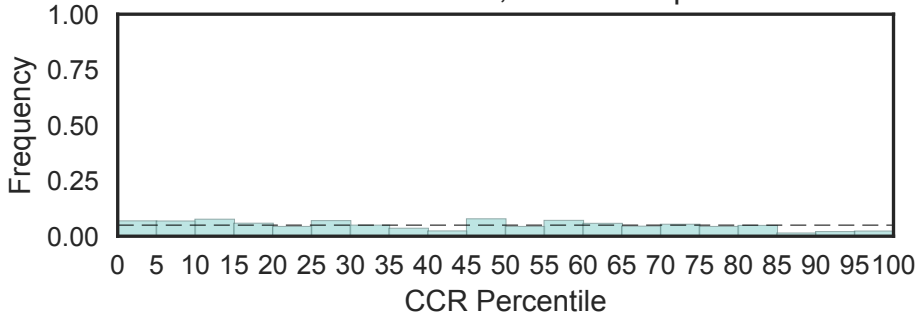

BRK domain  
(BRK, N=7)

Fisher's OR: 8.45; Bonferroni p-val: 1

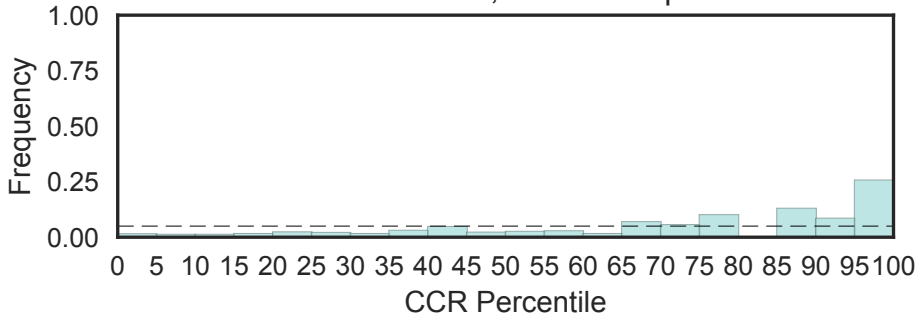

BRO1-like domain  
(BRO1, N=5)

Fisher's OR: 0.683; Bonferroni p-val: 1

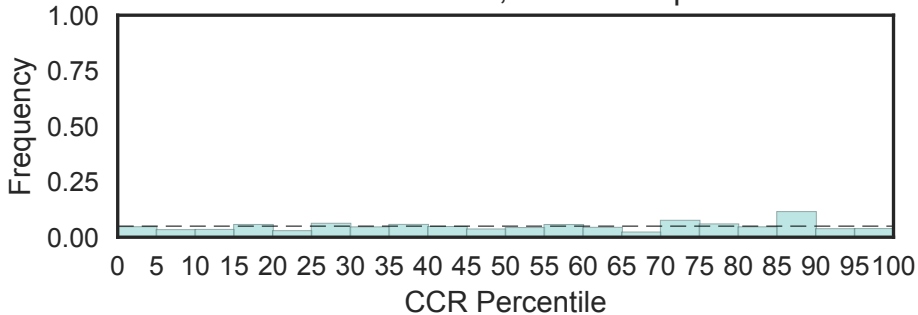

Broad-minded protein  
(BROMI, N=1)

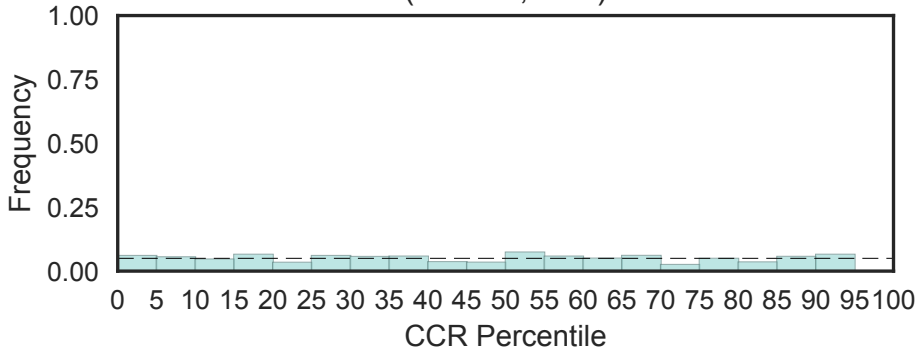

BSD domain  
(BSD, N=2)

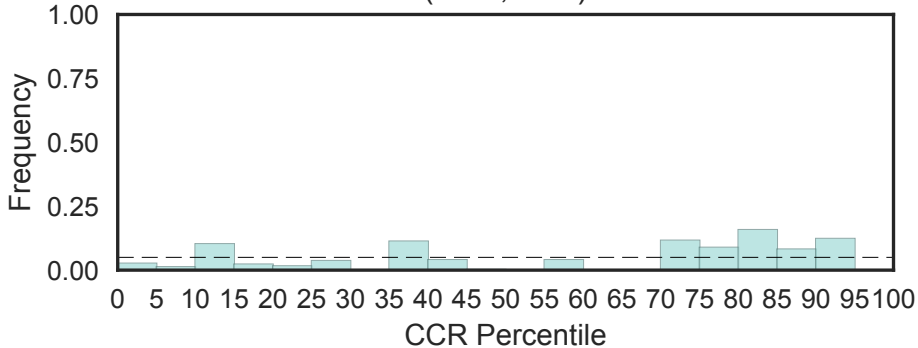

Brain specific membrane anchored protein  
(BSMAP, N=2)

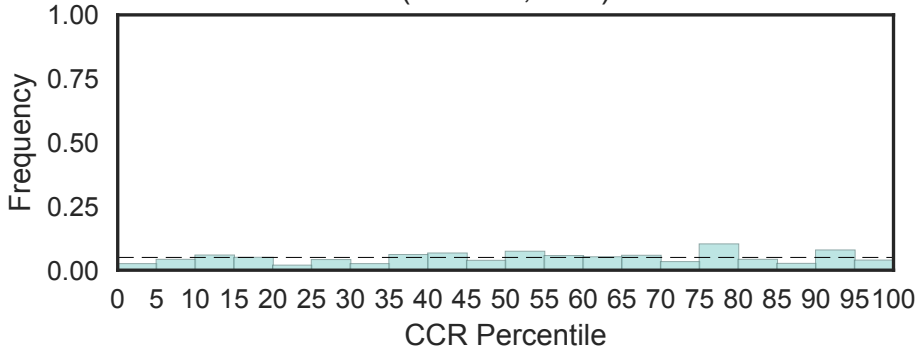

Bone sialoprotein II (BSP-II)  
(BSP\_II, N=1)

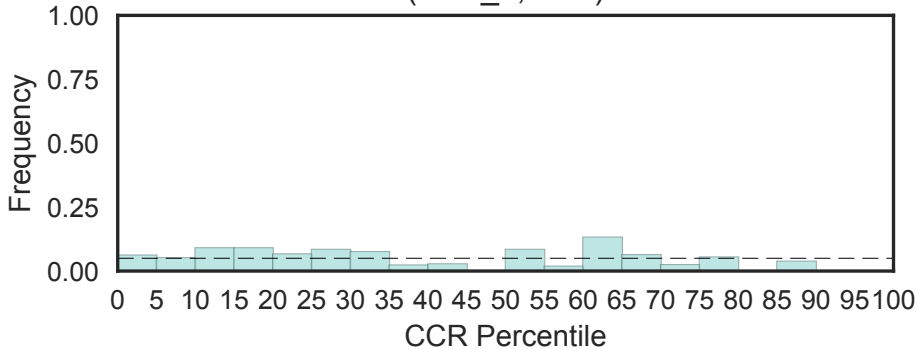



Bone marrow stromal antigen 2  
(BST2, N=1)

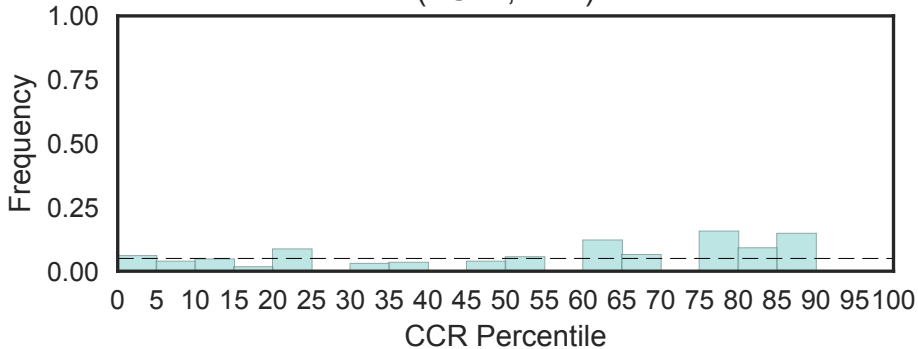

BTB/POZ domain  
(BTB, N=139)

Fisher's OR: 2.17; Bonferroni p-val: 1.85e-06

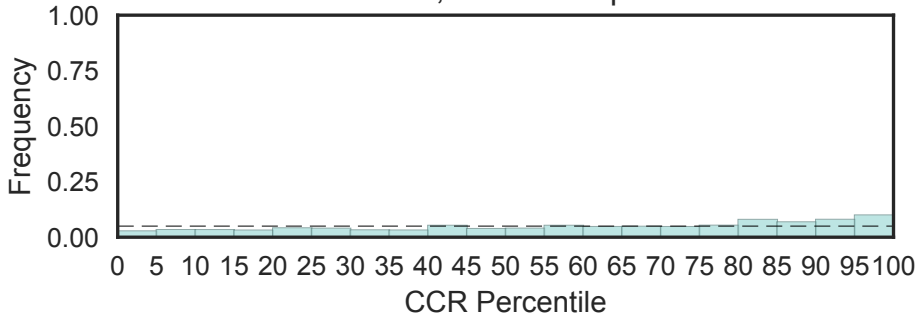

BTB/POZ domain  
(BTB\_2, N=51)

Fisher's OR: 2.39; Bonferroni p-val: 0.29

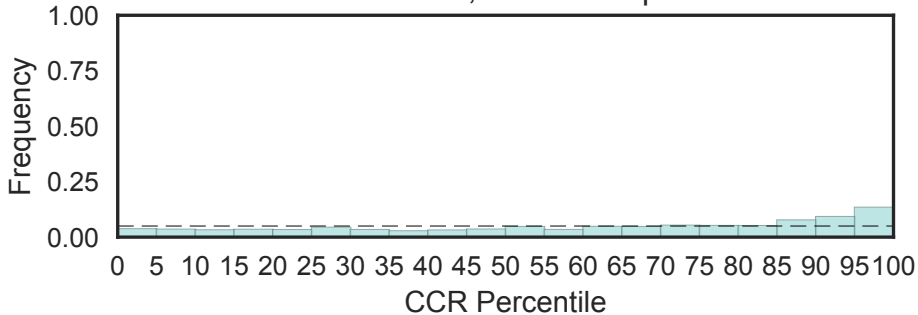

BTB/POZ domain  
(BTB\_3, N=2)

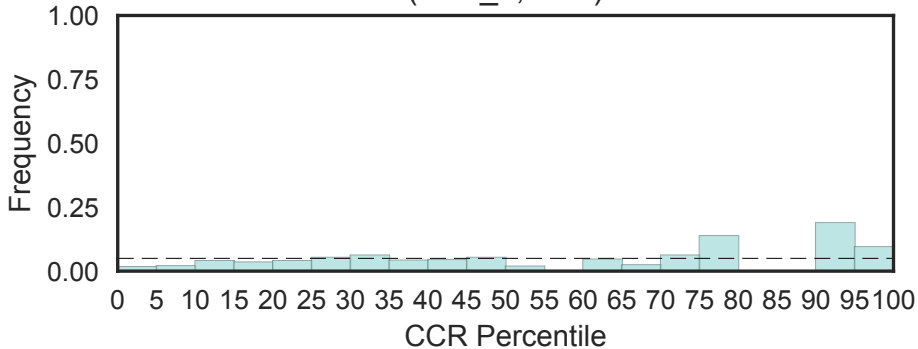

Beta-trefoil DNA-binding domain  
(BTD, N=2)

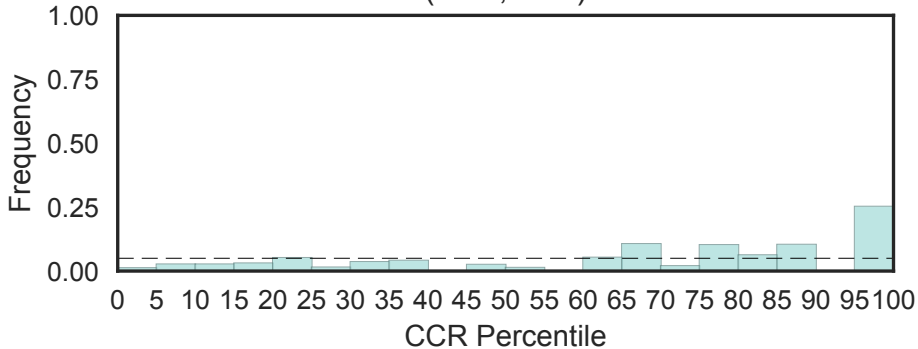

BTG family  
(BTG, N=6)

Fisher's OR: 1.98; Bonferroni p-val: 1

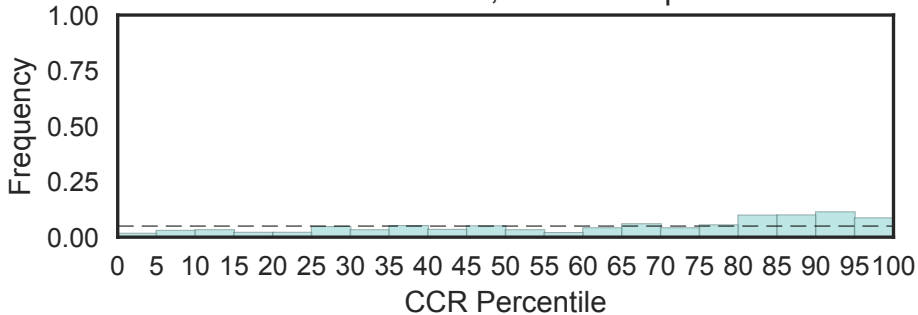

BTK motif  
(BTK, N=8)

Fisher's OR: 0; Bonferroni p-val: 1

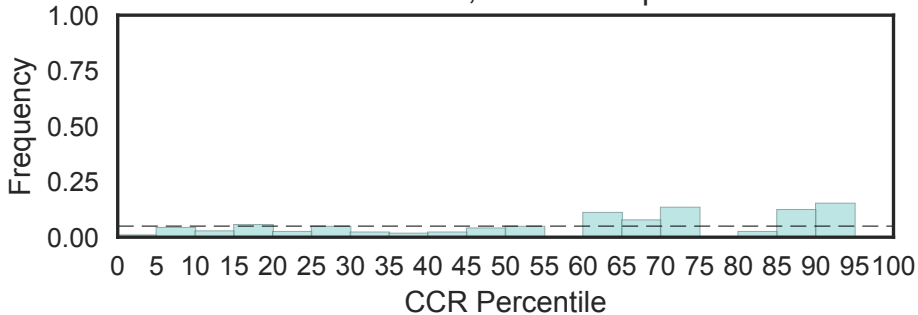

BUD22  
(BUD22, N=1)

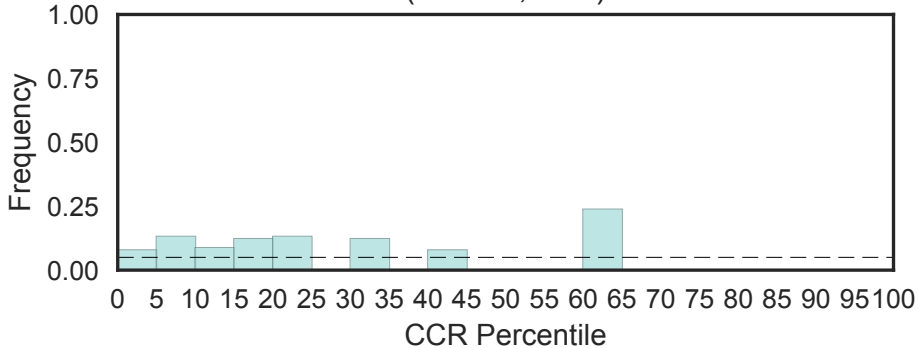



Surface antigen  
(Bac\_surface\_Ag, N=1)

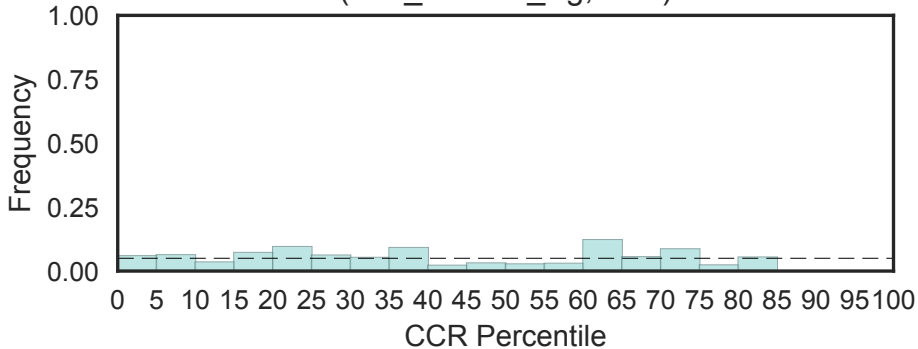

Band 3 cytoplasmic domain  
(Band\_3\_cyto, N=10)

Fisher's OR: 1.39; Bonferroni p-val: 1

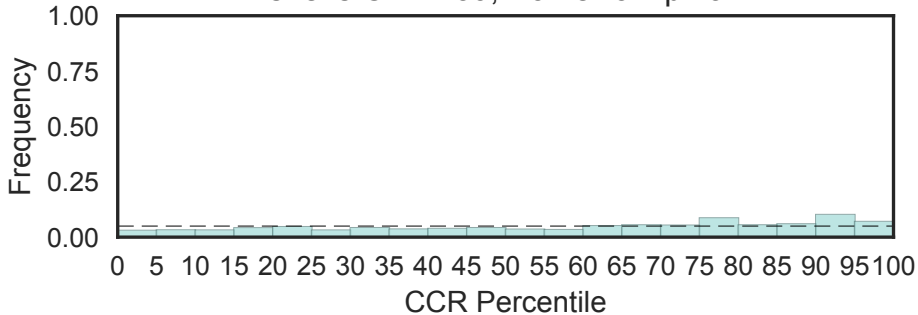

SPFH domain / Band 7 family  
(Band\_7, N=13)

Fisher's OR: 1.05; Bonferroni p-val: 1

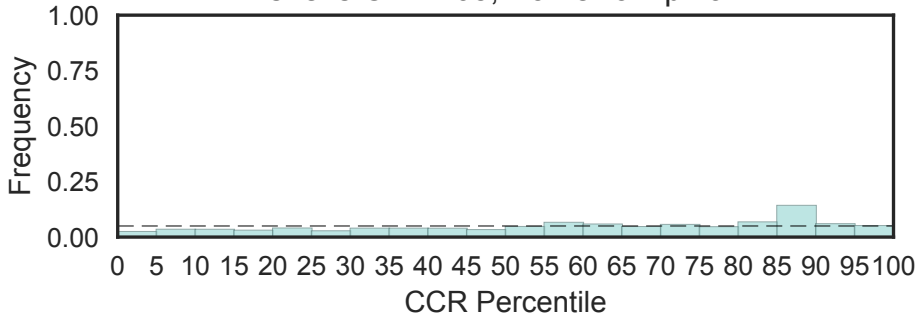

C-terminal region of band\_7  
(Band\_7\_C, N=1)

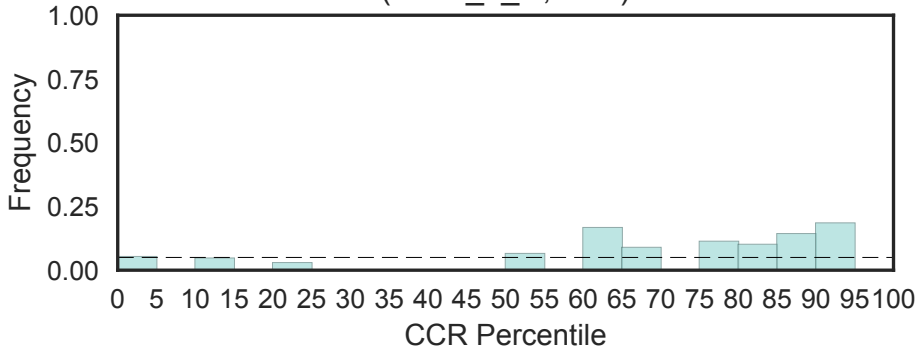

B-cell receptor-associated protein 31-like  
(Bap31, N=1)

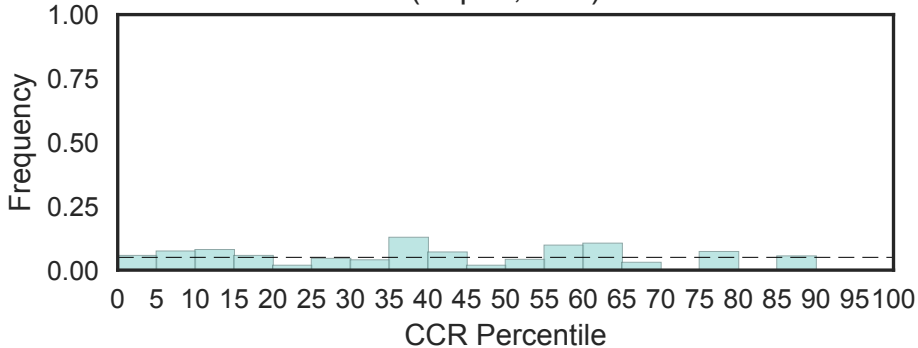

Bartter syndrome, infantile, with sensorineural deafness (Barttin)  
(Barttin, N=1)

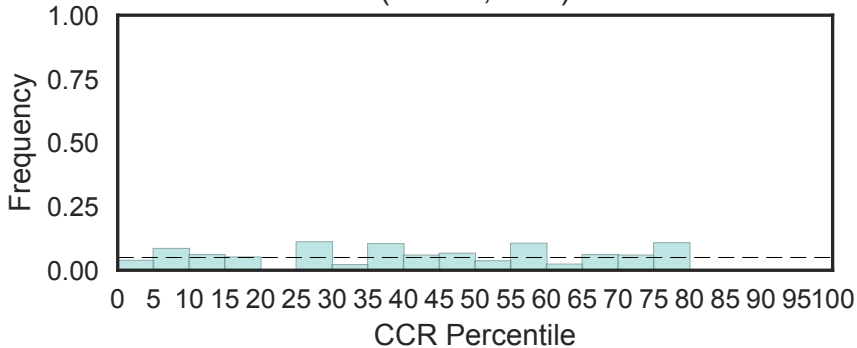

Myogenic Basic domain  
(Basic, N=4)

Fisher's OR: 0; Bonferroni p-val: 1

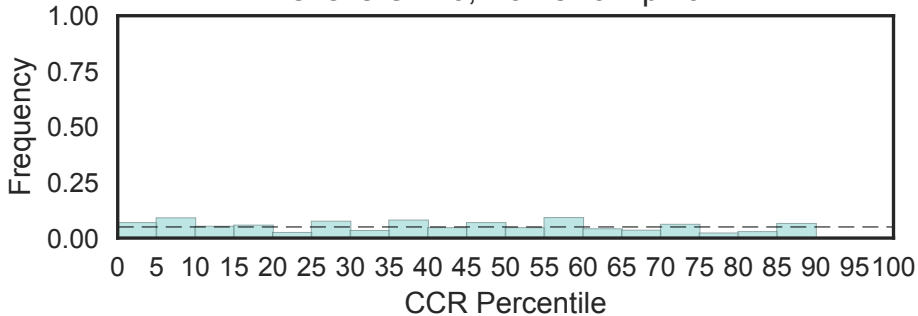

Inhibitor of apoptosis-promoting Bax1  
(Bax1-I, N=6)

Fisher's OR: 0; Bonferroni p-val: 1

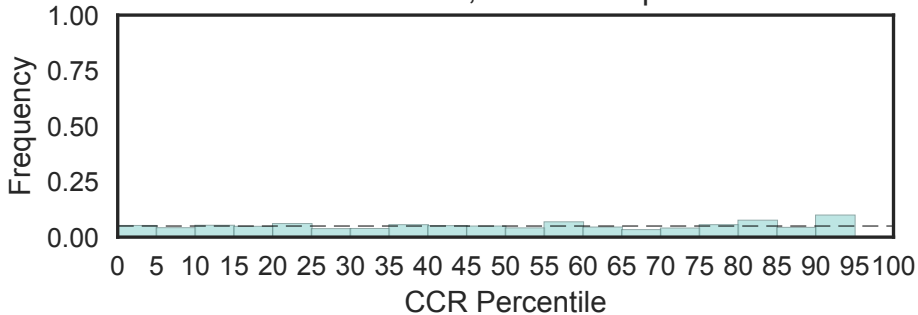



Apoptosis regulator proteins, Bcl-2 family  
(Bcl-2, N=11)

Fisher's OR: 0.295; Bonferroni p-val: 1

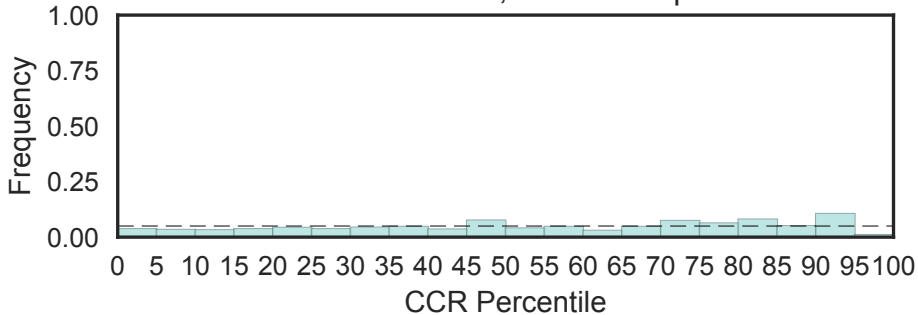

Pro-apoptotic Bcl-2 protein, BAD  
(Bcl-2\_BAD, N=2)

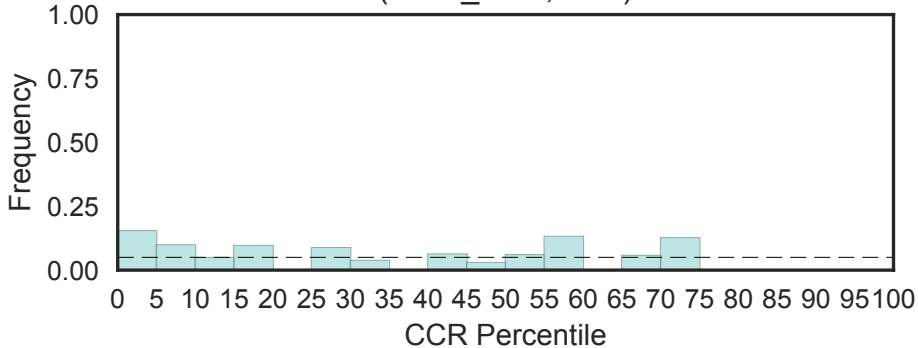

Putative Bcl-2 like protein of testis  
(Bclt, N=1)

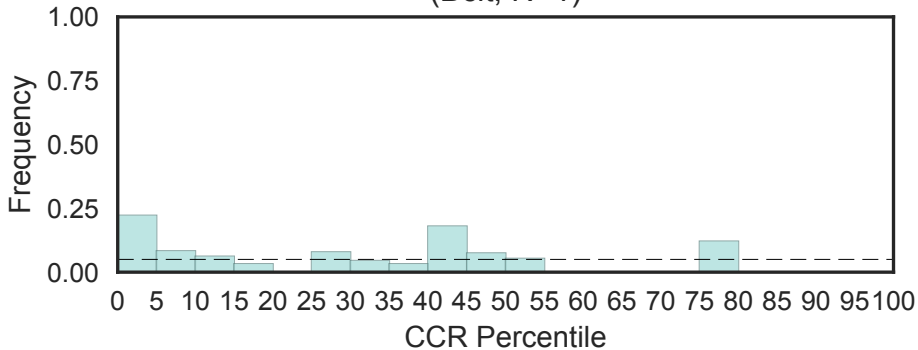

Bcl-x interacting, BH3 domain  
(Bclx\_interact, N=1)

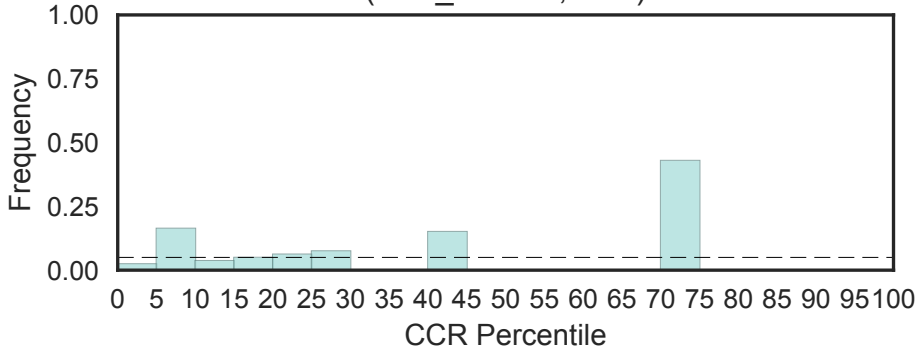

Bcr-Abl oncoprotein oligomerisation domain  
(Bcr-Abl\_Oligo, N=1)

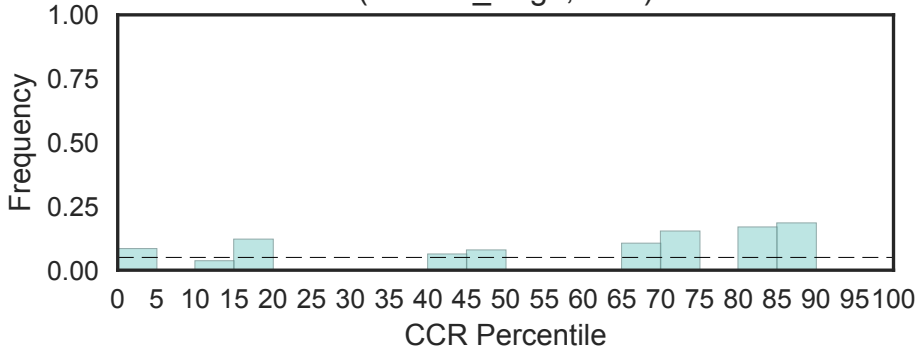

BadF/BadG/BcrA/BcrD ATPase family  
(BcrAD\_BadFG, N=1)

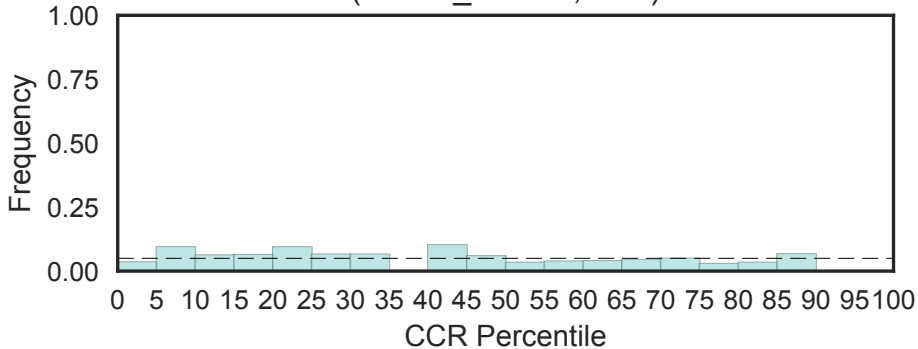

Beige/BEACH domain  
(Beach, N=9)

Fisher's OR: 2.05; Bonferroni p-val: 1

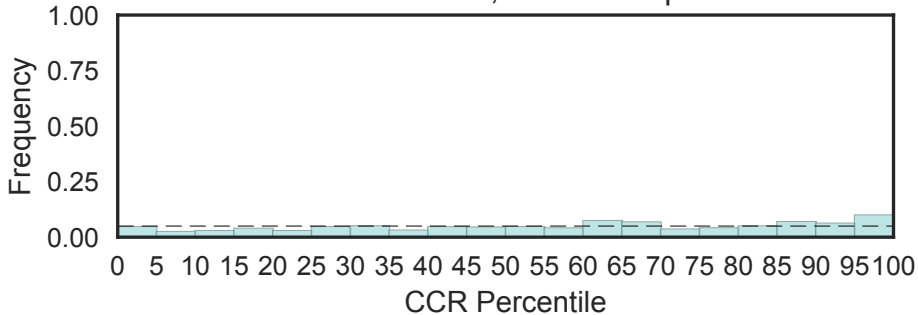

Bestrophin, RFP-TM, chloride channel  
(Bestrophin, N=5)

Fisher's OR: 0.433; Bonferroni p-val: 1

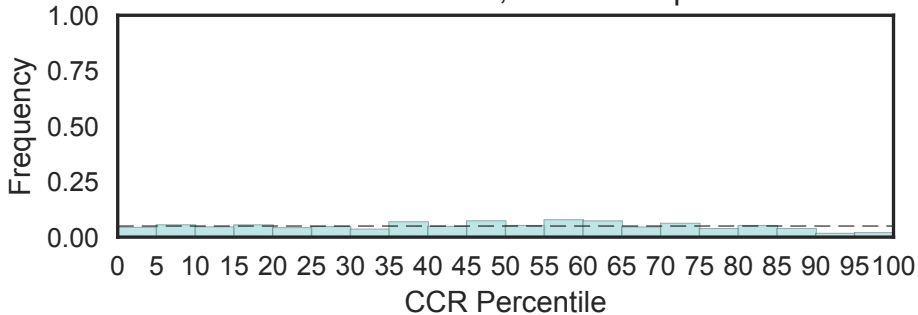



Beta-amyloid peptide (beta-APP)  
(Beta-APP, N=1)

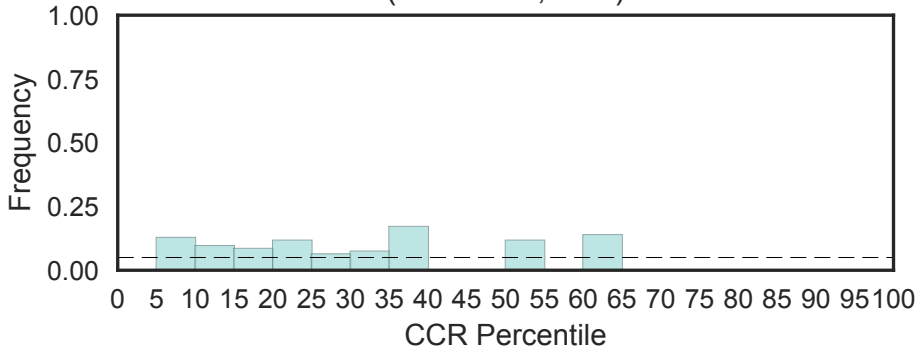

Beta-Casp domain  
(Beta-Casp, N=4)

Fisher's OR: 2.12; Bonferroni p-val: 1

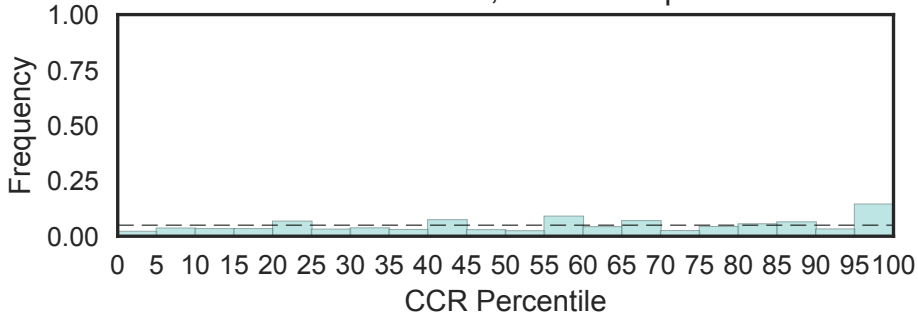

D domain of beta-TrCP  
(Beta-TrCP\_D, N=2)

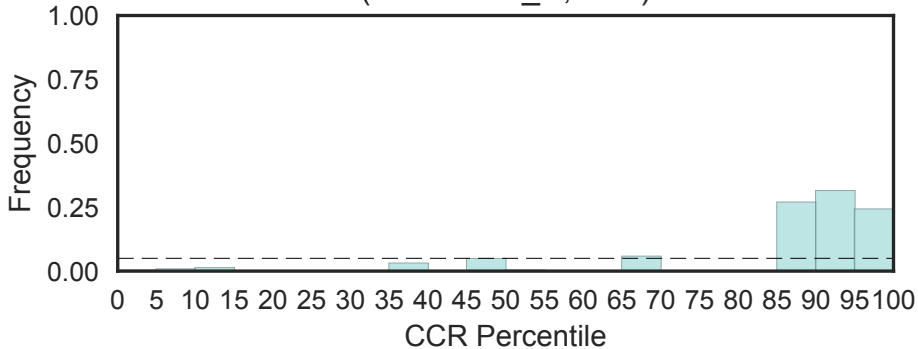

Beta-lactamase  
(Beta-lactamase, N=2)

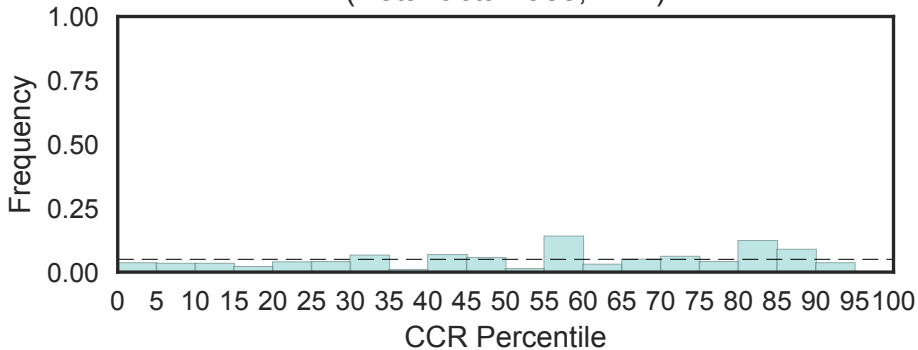

Beta-galactosidase jelly roll domain  
(BetaGal\_dom4\_5, N=1)

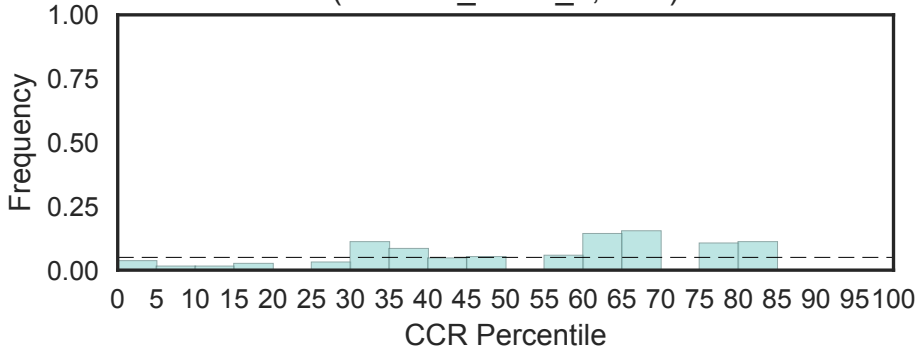

Beta-eliminating lyase  
(Beta\_elim\_lyase, N=4)

Fisher's OR: 0.281; Bonferroni p-val: 1

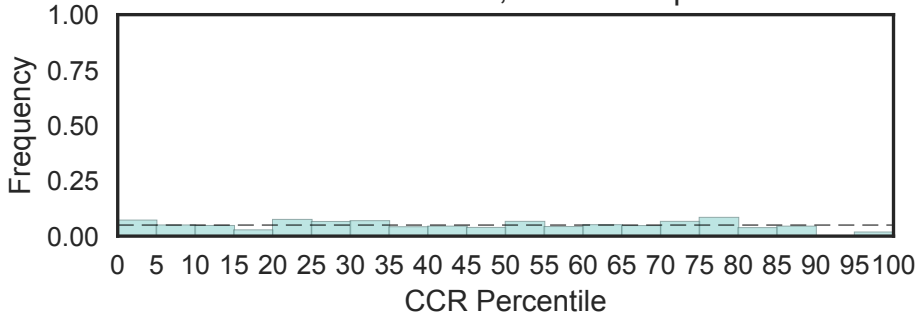

Right handed beta helix region  
(Beta\_helix, N=8)

Fisher's OR: 2.7; Bonferroni p-val: 1

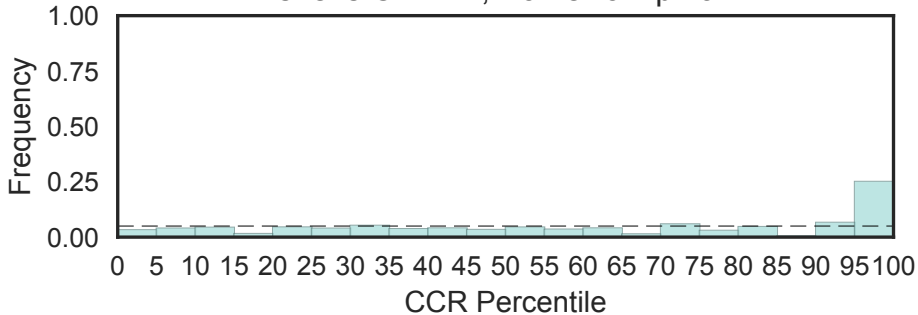

Microtubule-associated protein Bicaudal-D  
(BicD, N=2)

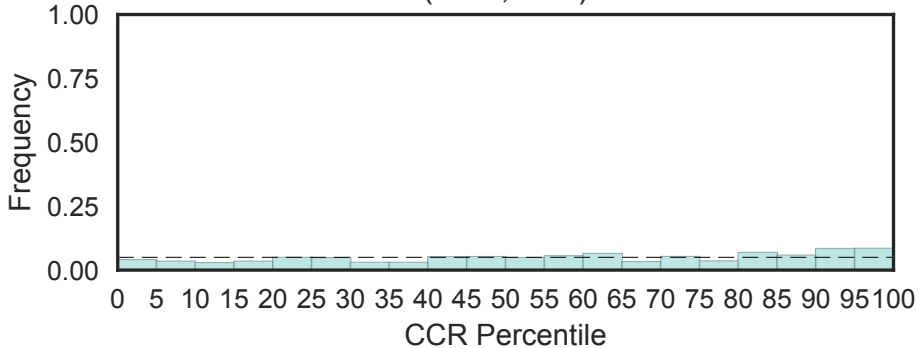



Bacterial Ig-like domain (group 2)  
(Big\_2, N=2)

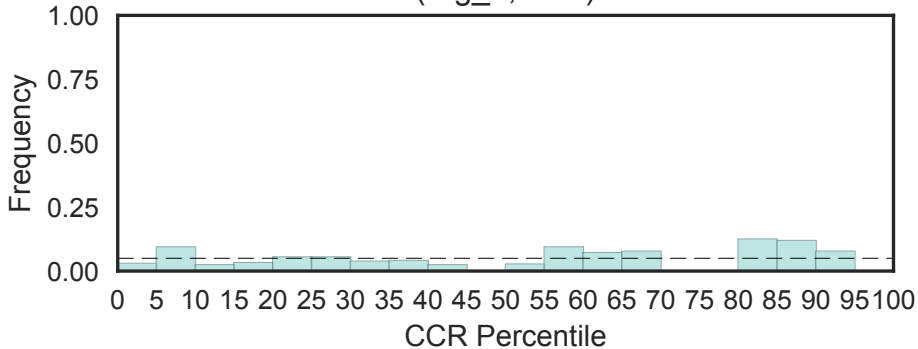

Bacterial Ig-like domain (group 3)

(Big\_3\_2, N=3)

Fisher's OR: 0; Bonferroni p-val: 1

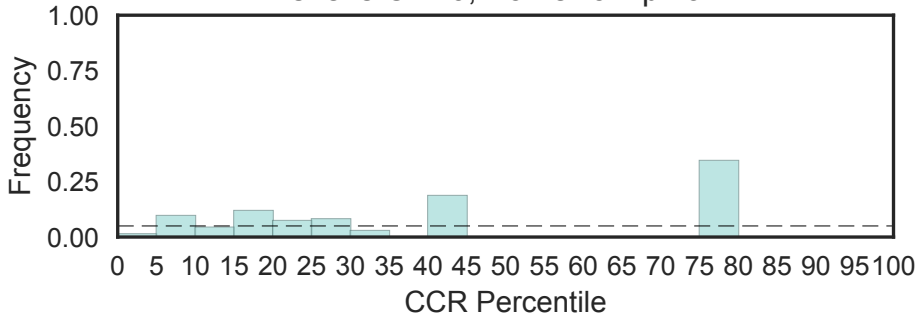

Acyl-CoA thioester hydrolase/BAAT N-terminal region  
(Bile\_Hydr\_Trans, N=4)

Fisher's OR: 0; Bonferroni p-val: 1

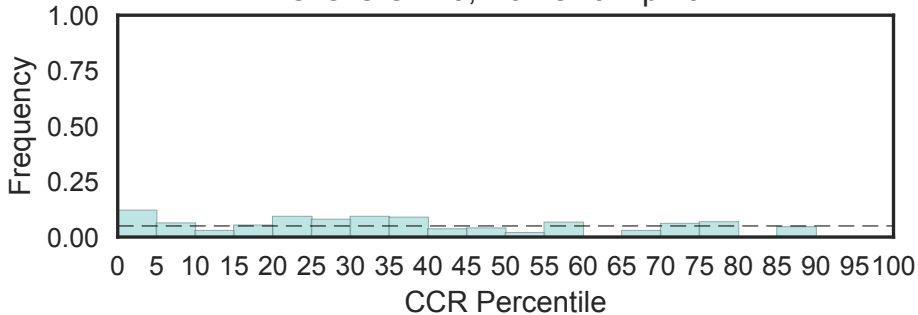

Biliverdin reductase, catalytic  
(Biliv-reduc\_cat, N=1)

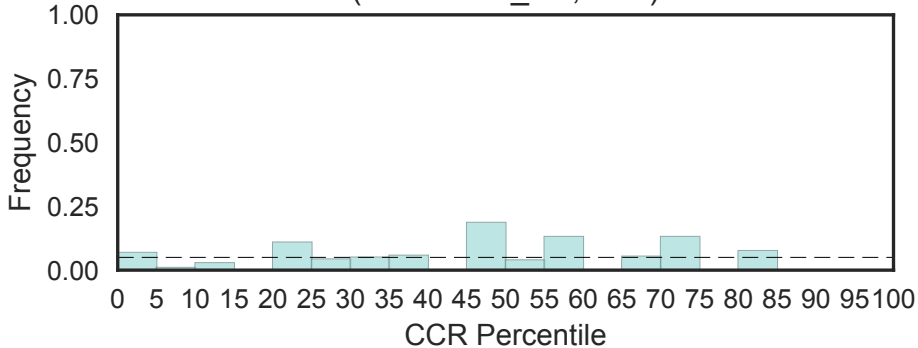

Bim protein N-terminus  
(Bim\_N, N=1)

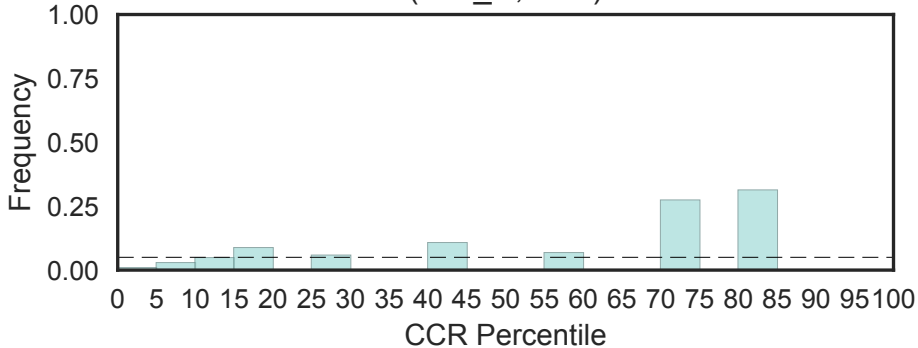

Bicoid-interacting protein 3 (Bin3)  
(Bin3, N=2)

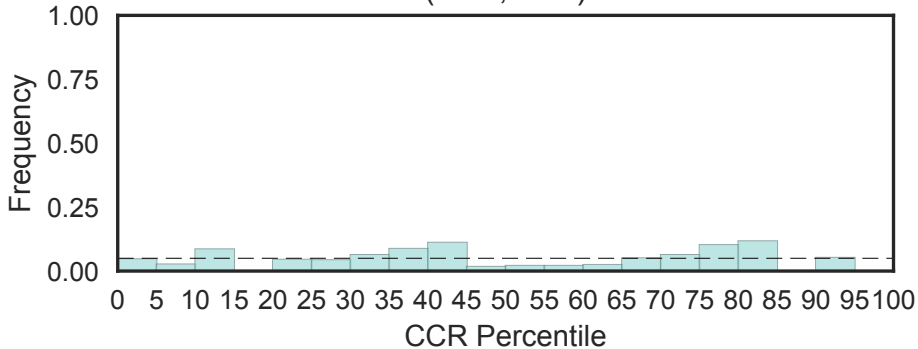

# Spermatogenesis family BioT2 (BioT2, N=1)

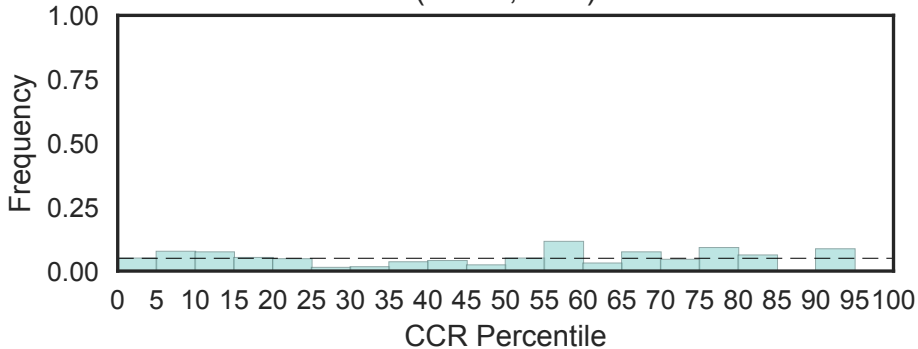

Biopterin-dependent aromatic amino acid hydroxylase  
(Biopterin\_H, N=4)

Fisher's OR: 0.225; Bonferroni p-val: 1

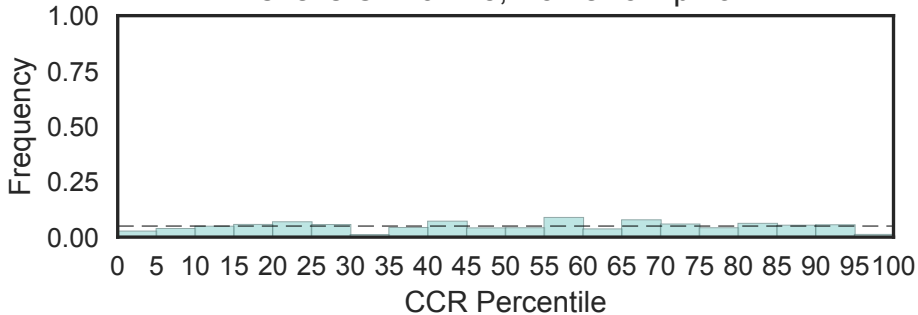



# Biotin carboxylase C-terminal domain

(Biotin\_carb\_C, N=6)

Fisher's OR: 1.04; Bonferroni p-val: 1

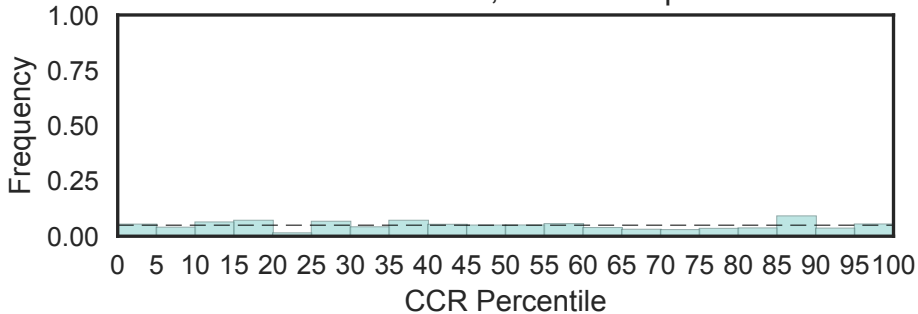

Biotin carboxylase, N-terminal domain  
(Biotin\_carb\_N, N=5)

Fisher's OR: 2.26; Bonferroni p-val: 1

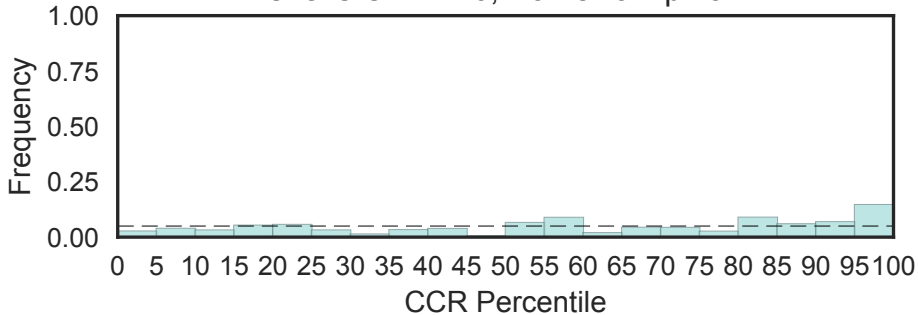

Biotin-requiring enzyme  
(Biotin\_lipoyl, N=10)

Fisher's OR: 0; Bonferroni p-val: 1

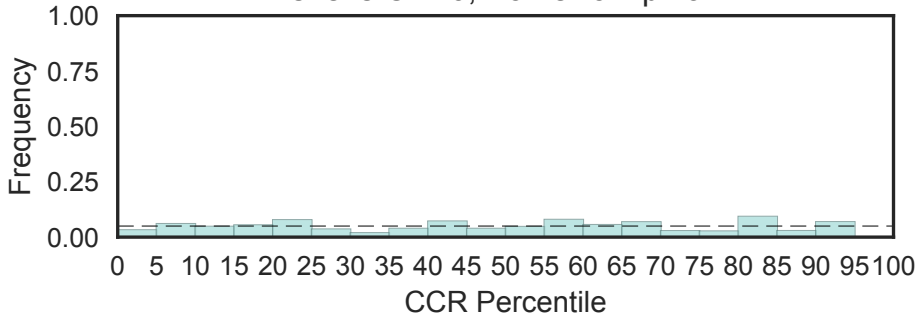

25S rRNA (adenine(2142)-N(1))-methyltransferase, Bmt2  
(Bmt2, N=1)

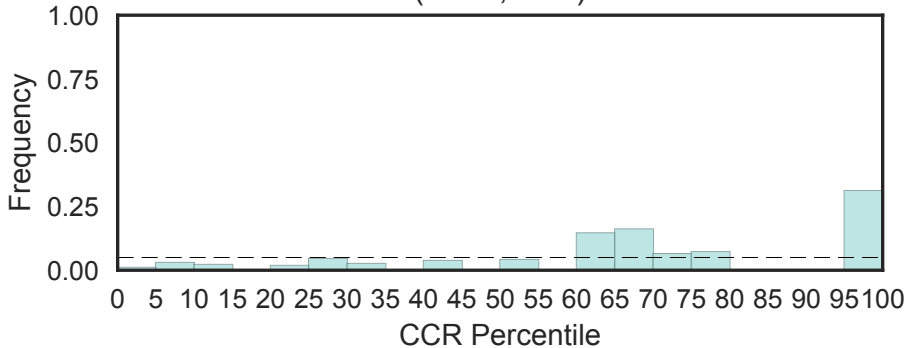

BolA-like protein  
(BolA, N=5)

Fisher's OR: 1.83; Bonferroni p-val: 1

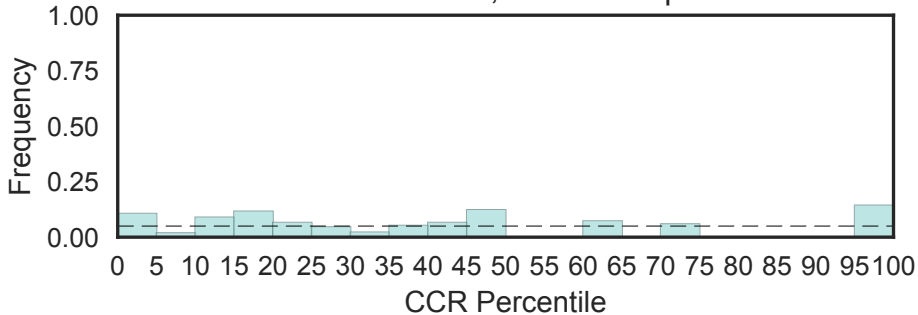

Bombesin-like peptide  
(Bombesin, N=2)

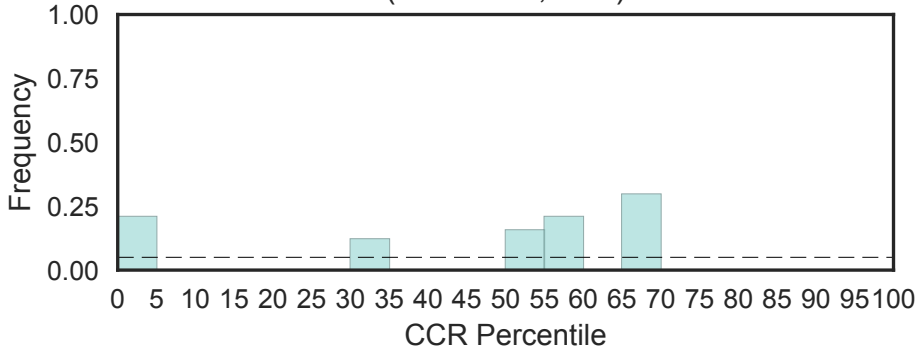

Cell division cycle-associated protein 8  
(Borealin, N=1)

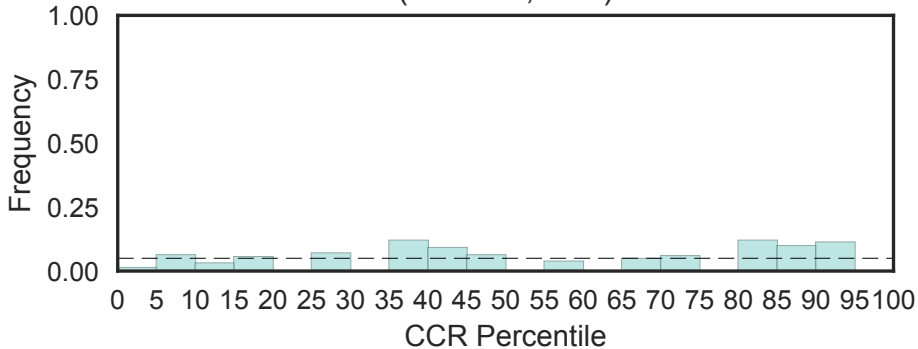

Core-2/I-Branching enzyme  
(Branch, N=7)

Fisher's OR: 0; Bonferroni p-val: 0.739

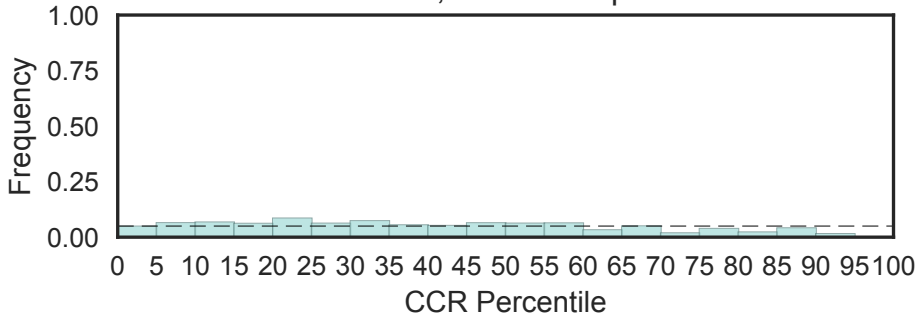



Bravo-like intracellular region  
(Bravo\_FIGEY, N=3)  
Fisher's OR: 0; Bonferroni p-val: 1

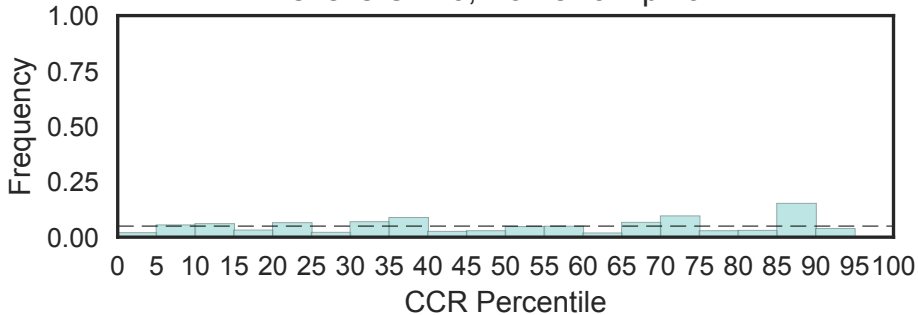

Brix domain  
(Brix, N=6)

Fisher's OR: 0.205; Bonferroni p-val: 1

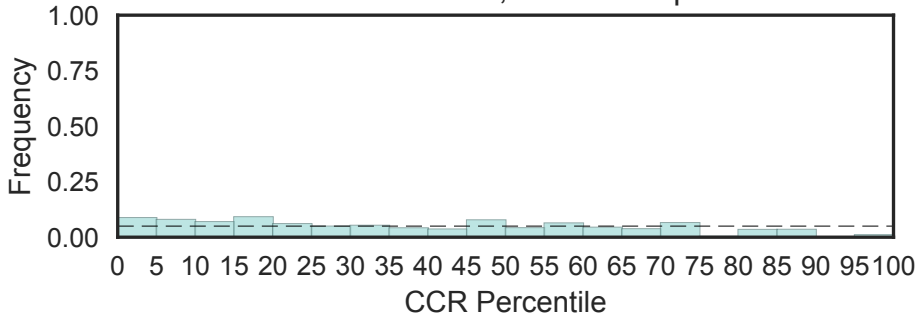

Brinker DNA-binding domain  
(BrkDBD, N=1)

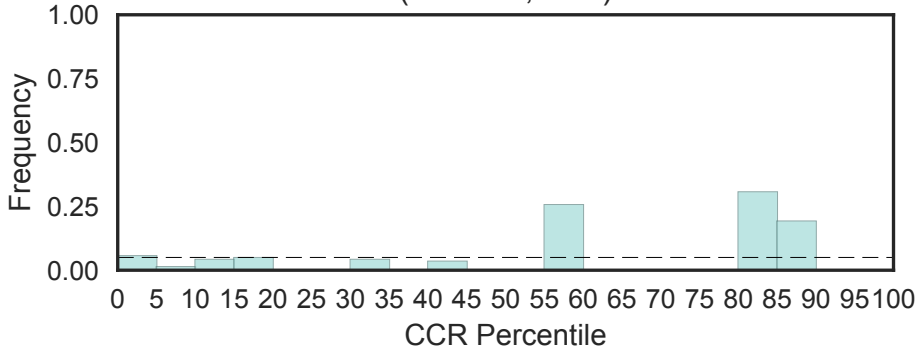

# Bromodomain associated

(Bromo\_TP, N=3)

Fisher's OR: 0; Bonferroni p-val: 1

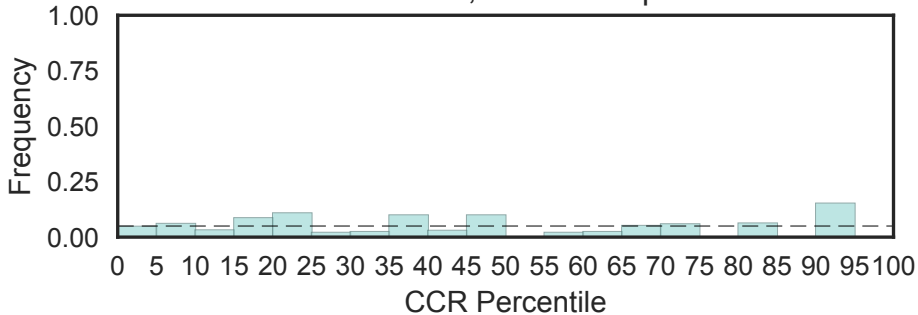

Histone-fold protein  
(Bromo\_TP\_like, N=1)

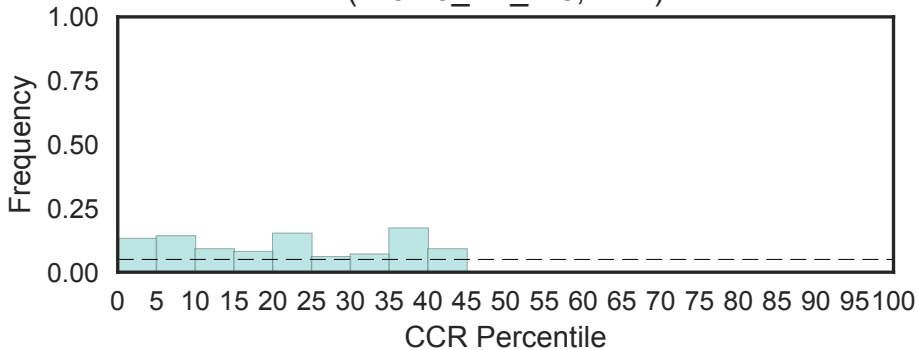

Bromodomain  
(Bromodomain, N=50)

Fisher's OR: 4.89; Bonferroni p-val: 1.55e-11

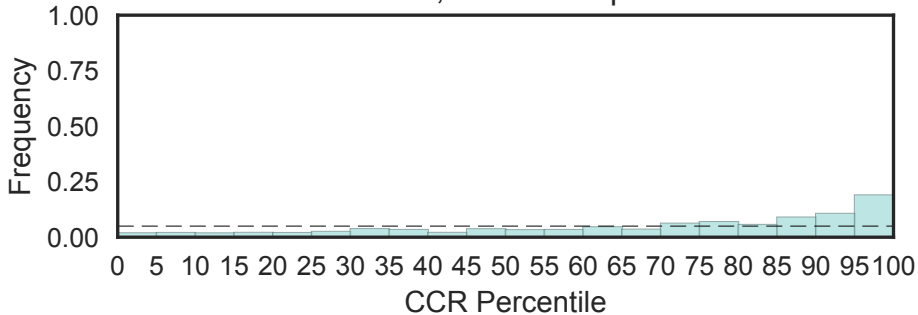

# CASC3/Barentsz eIF4AIII binding (Btz, N=1)

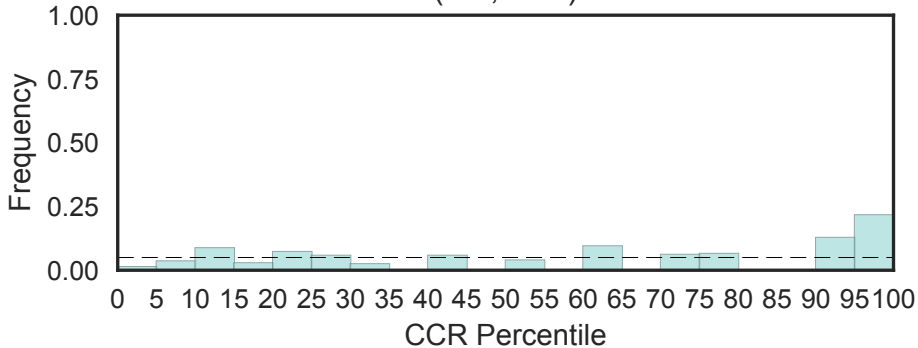

Pre-mRNA-splicing factor of RES complex  
(Bud13, N=1)

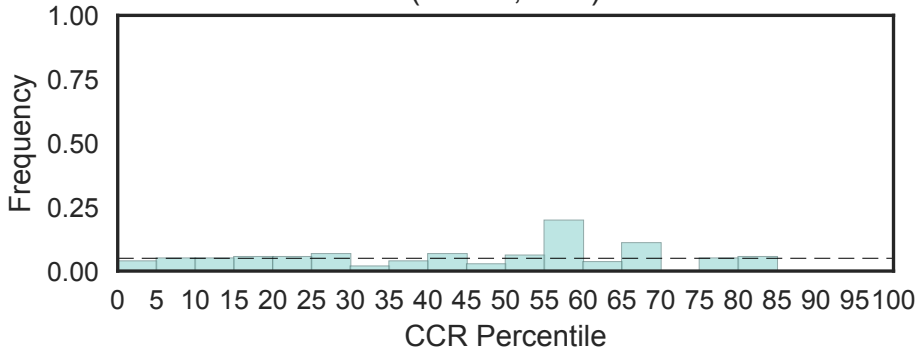



Bystin  
(Bystin, N=1)

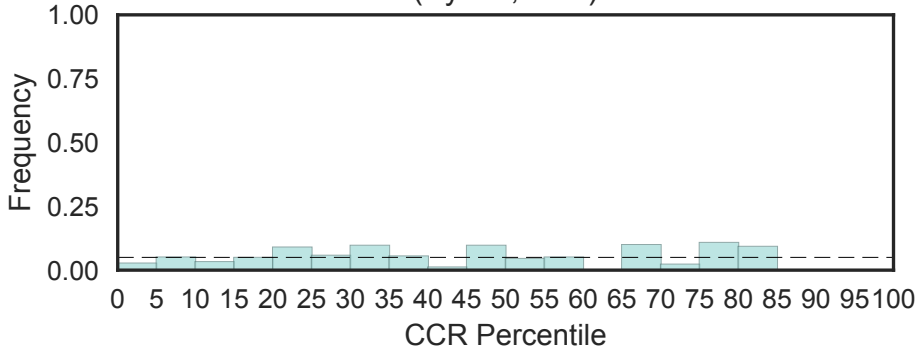

Immunoglobulin C1-set domain  
(C1-set, N=55)

Fisher's OR: 0.349; Bonferroni p-val: 1

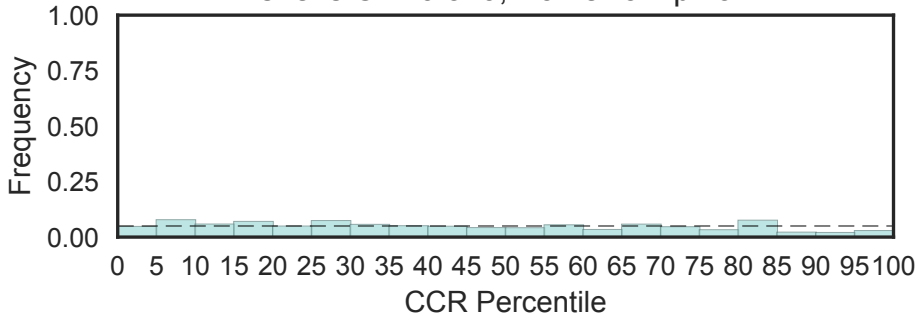

Phorbol esters/diacylglycerol binding domain (C1 domain)  
(C1\_1, N=64)

Fisher's OR: 2.76; Bonferroni p-val: 0.146

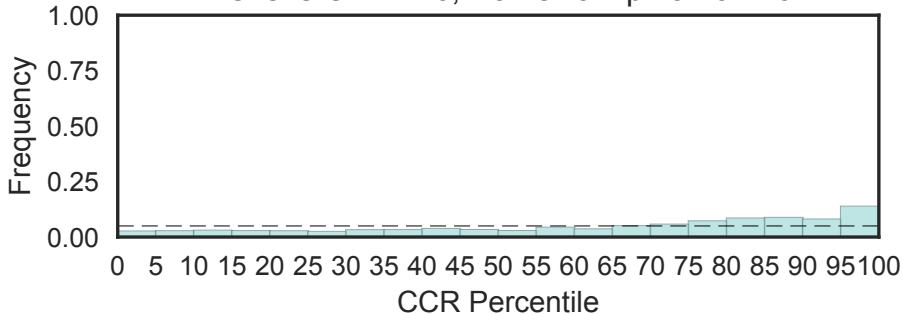

C1q domain  
(C1q, N=32)

Fisher's OR: 0.811; Bonferroni p-val: 1

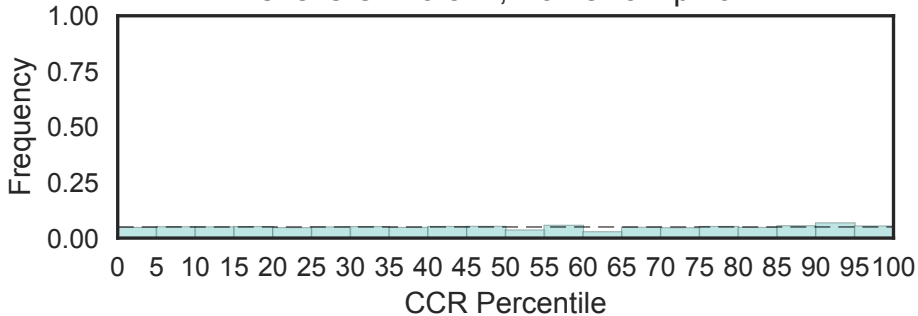

C2 domain  
(C2, N=213)

Fisher's OR: 0.91; Bonferroni p-val: 1

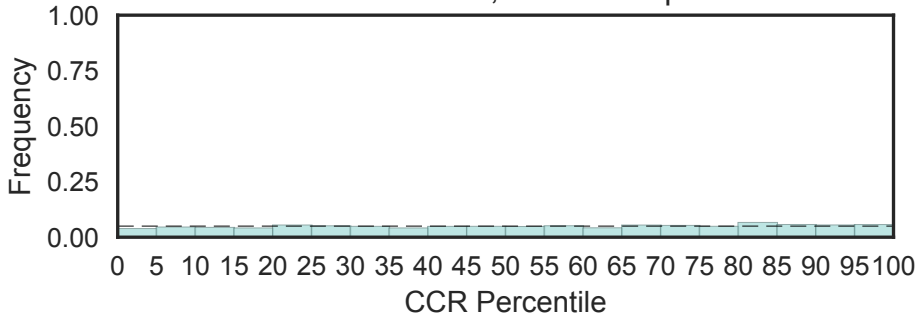

First C2 domain of RPGR-interacting protein 1  
(C2-C2\_1, N=2)

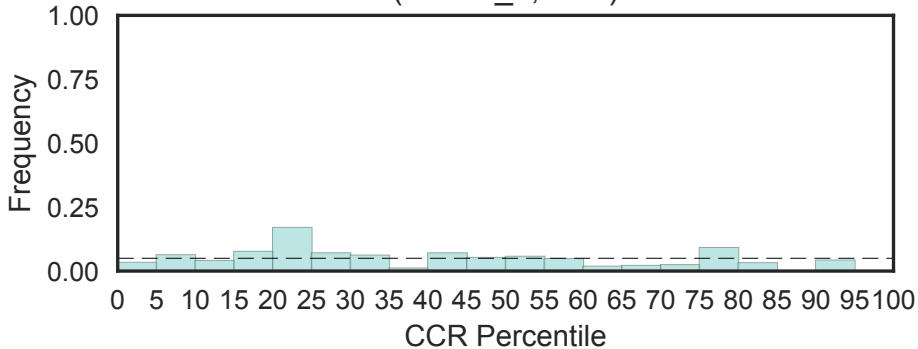

Immunoglobulin C2-set domain  
(C2-set, N=5)

Fisher's OR: 0; Bonferroni p-val: 1

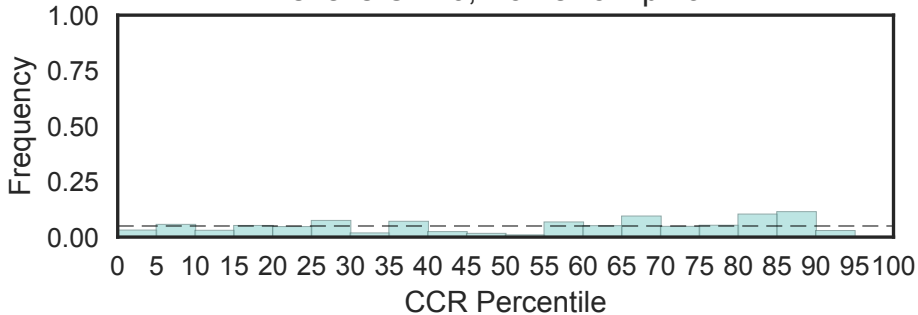

CD80-like C2-set immunoglobulin domain  
(C2-set\_2, N=53)

Fisher's OR: 0.24; Bonferroni p-val: 1

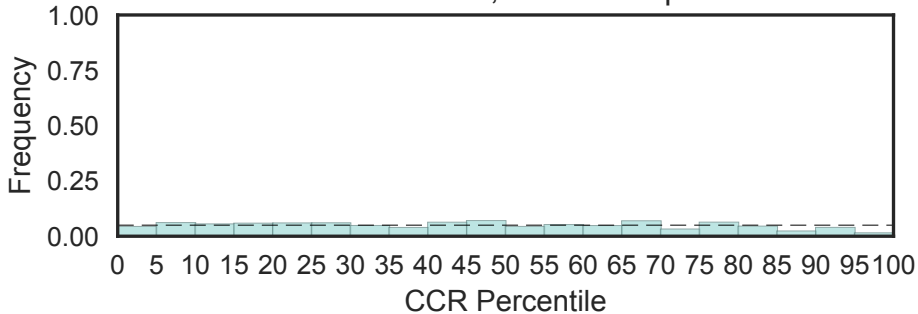



C-terminal tandem repeated domain in type 4 procollagen  
(C4, N=8)

Fisher's OR: 0; Bonferroni p-val: 1

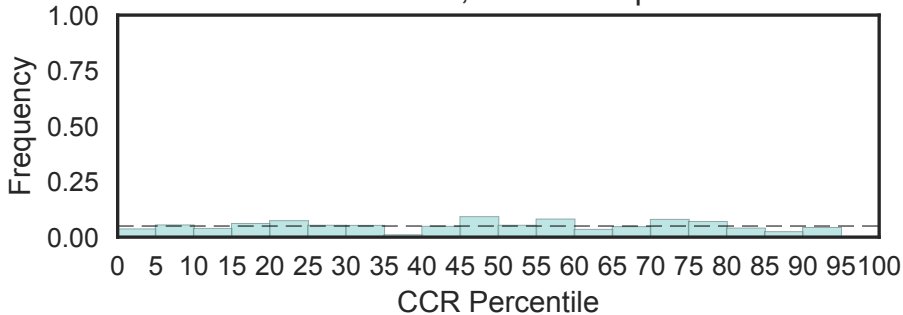

D-glucuronyl C5-epimerase C-terminus  
(C5-epim\_C, N=1)

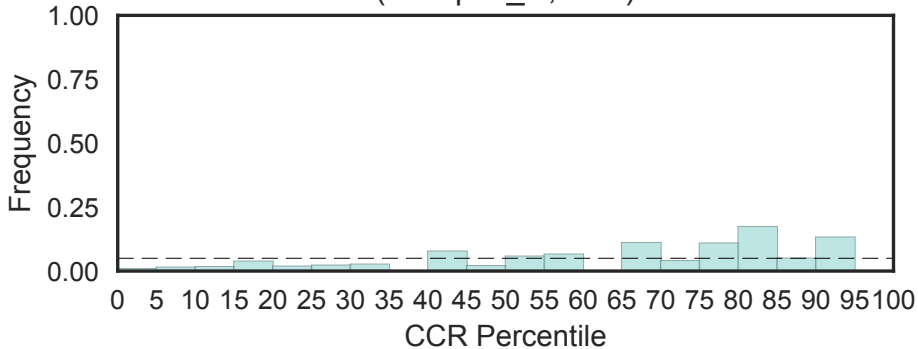

Cysteine-rich domain  
(C6\_DPF, N=1)

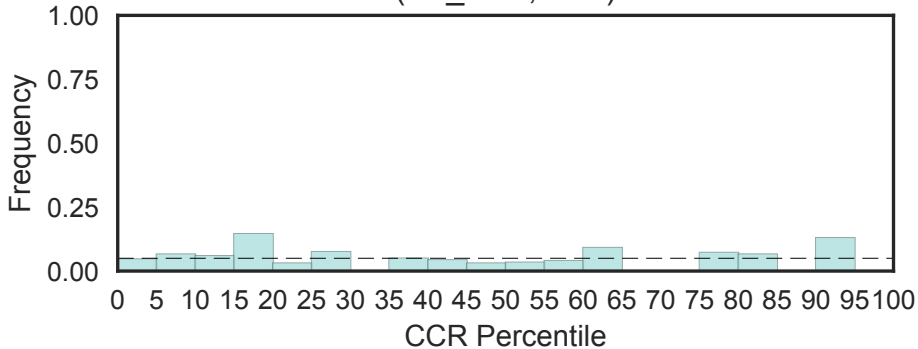

C8 domain  
(C8, N=44)

Fisher's OR: 0.115; Bonferroni p-val: 1

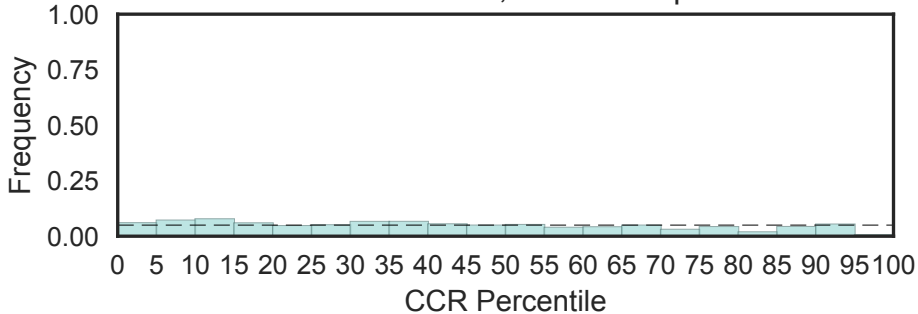

C9orf72-like protein family  
(C9orf72-like, N=1)

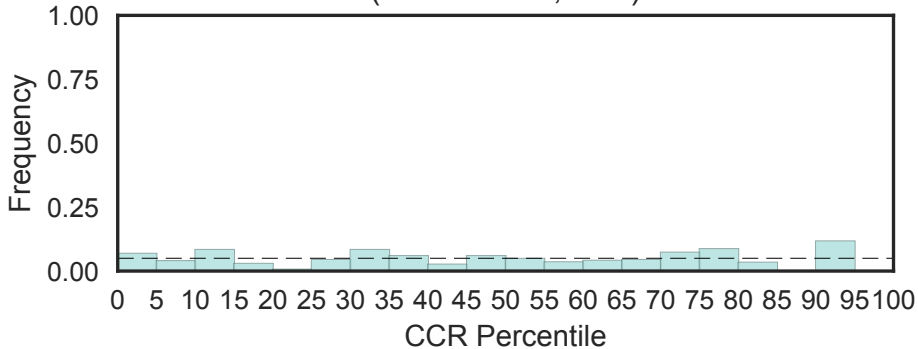

# Caspase activity and apoptosis inhibitor 1 (CAAP1, N=1)

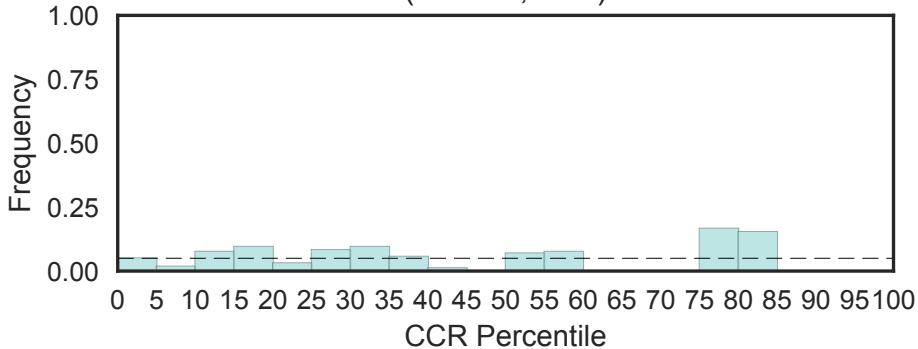

Cell-cycle sustaining, positive selection,  
(CABIT, N=6)

Fisher's OR: 0.398; Bonferroni p-val: 1

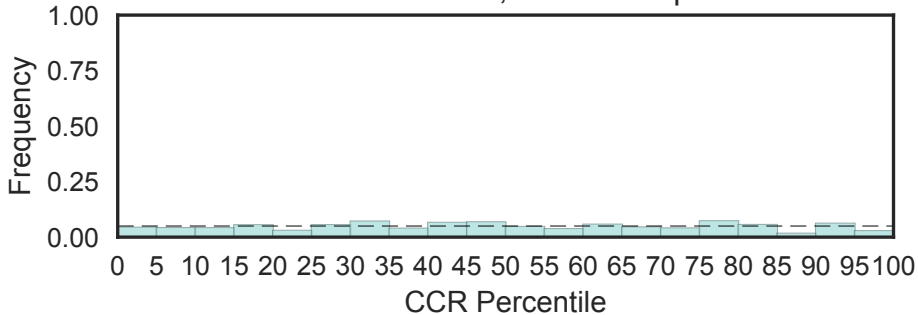

# Calcium-binding and spermatid-specific protein 1 (CABS1, N=1)

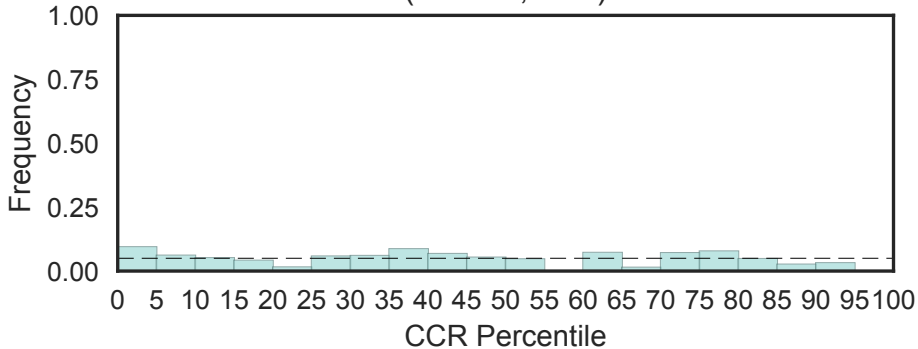



Voltage-gated calcium channel subunit alpha, C-term  
(CAC1F\_C, N=3)

Fisher's OR: 0; Bonferroni p-val: 1

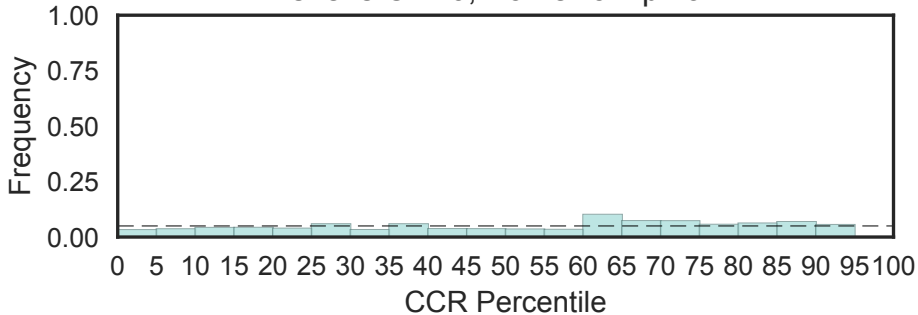

Chromatin assembly factor 1 complex p150 subunit, N-terminal  
(CAF-1\_p150, N=1)

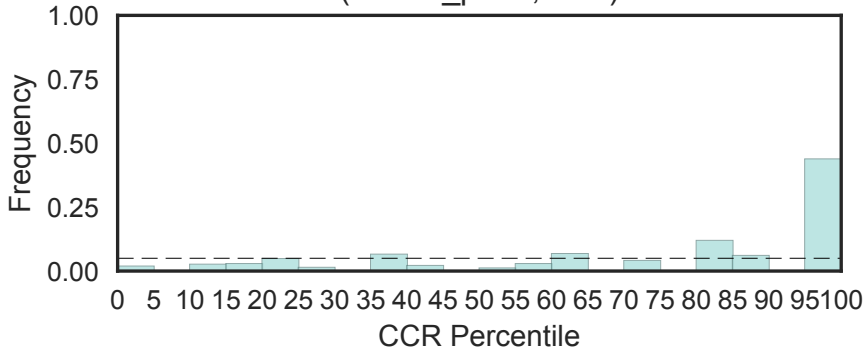

Chromatin assembly factor complex 1 subunit p60, C-terminal  
(CAF-1\_p60\_C, N=1)

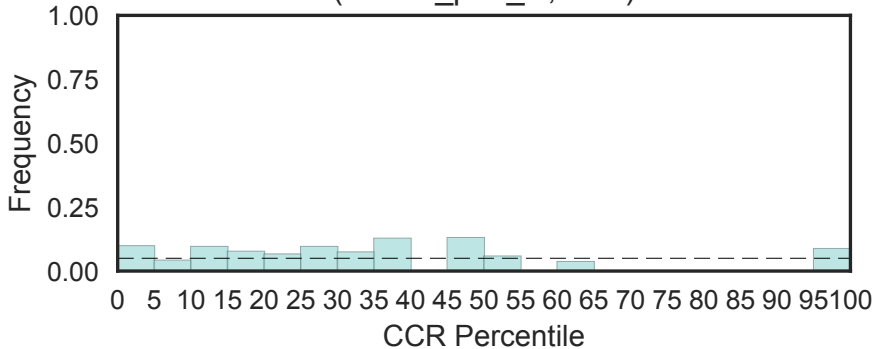

CAF1 family ribonuclease  
(CAF1, N=8)

Fisher's OR: 1.43; Bonferroni p-val: 1

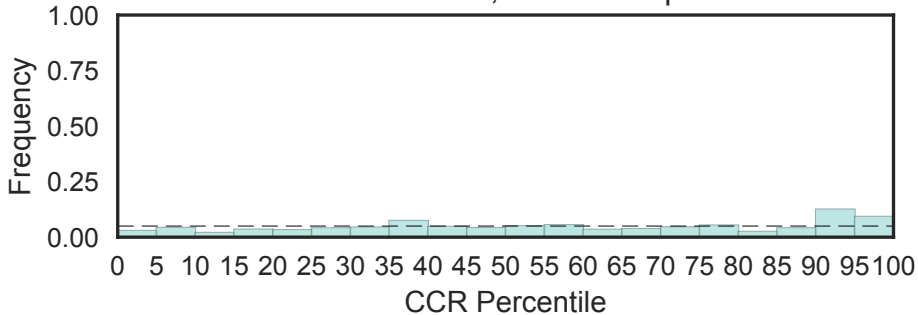

CAF1 complex subunit p150, region binding to CAF1-p60 at C-term  
(CAF1-p150\_C2, N=1)

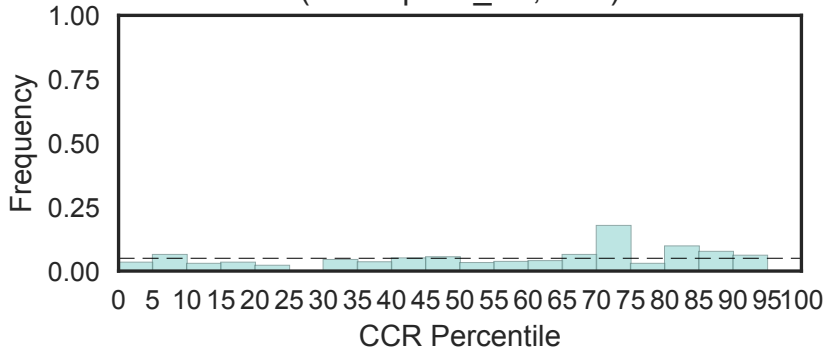

CAF1 complex subunit p150, region binding to PCNA  
(CAF1-p150\_N, N=1)

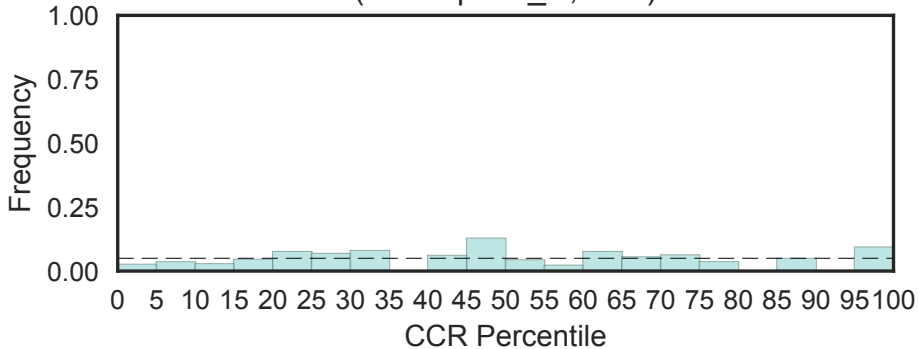

Chromatin assembly factor 1 subunit A  
(CAF1A, N=1)

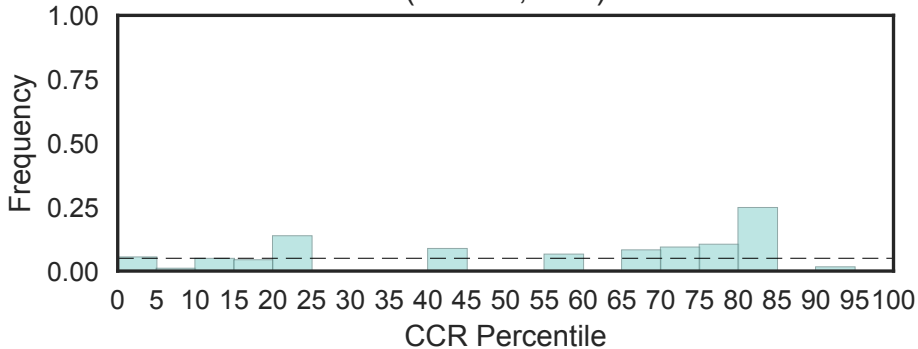

Histone-binding protein RBBP4 or subunit C of CAF1 complex  
(CAF1C\_H4-bd, N=2)

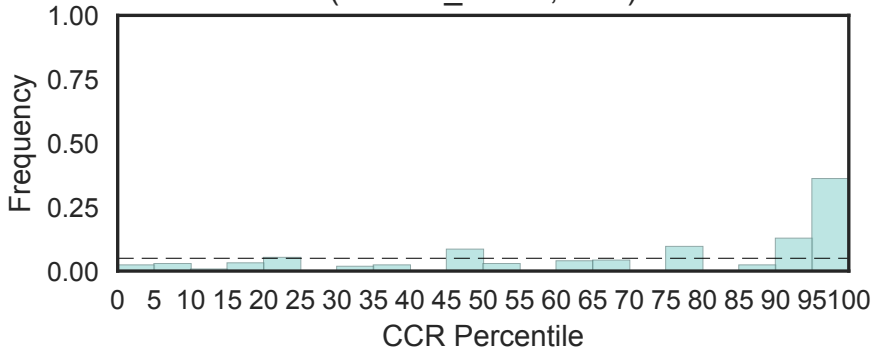



# Cancer-associated gene protein 1 family (CAGE1, N=2)

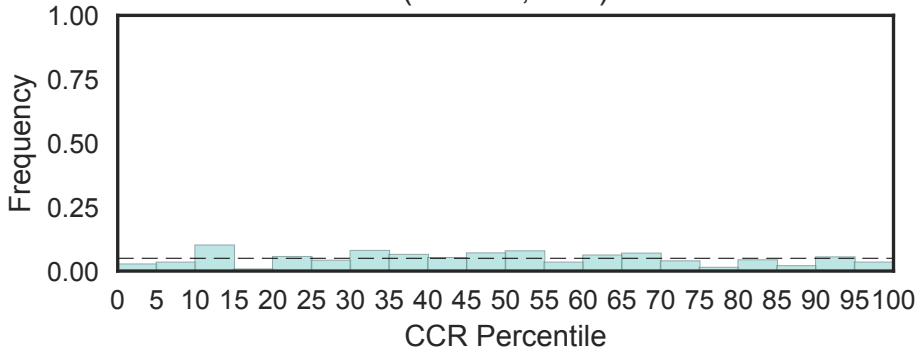

Calcium binding and coiled-coil domain (CALCOCO1) like  
(CALCOCO1, N=5)

Fisher's OR: 0.922; Bonferroni p-val: 1

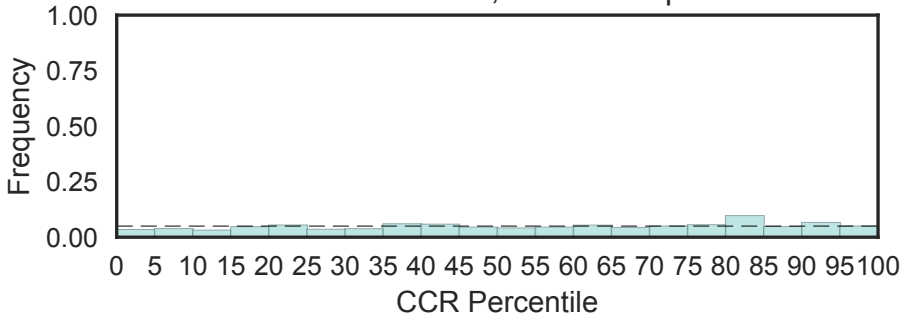

# Calcium-dependent calmodulin binding (CALM\_bind, N=2)

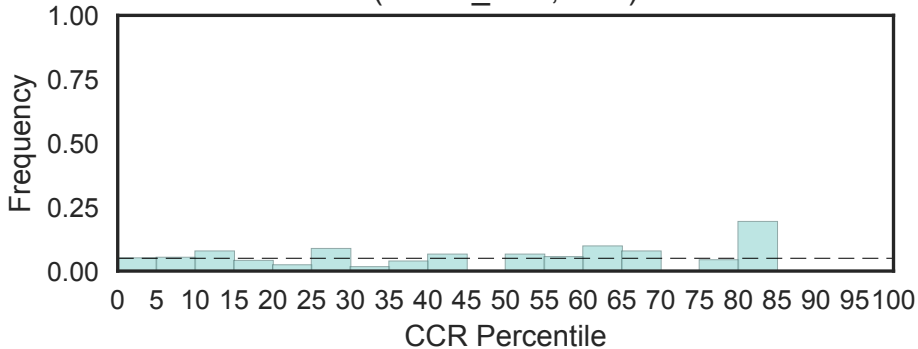

Calcium signal-modulating cyclophilin ligand  
(CAML, N=1)

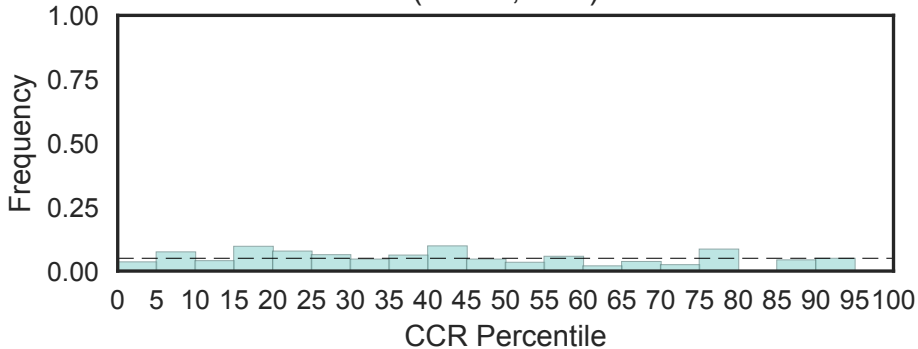

Spectrin-binding region of Ca<sup>2+</sup>-Calmodulin  
(CAMSAP\_CC1, N=3)

Fisher's OR: 0; Bonferroni p-val: 1

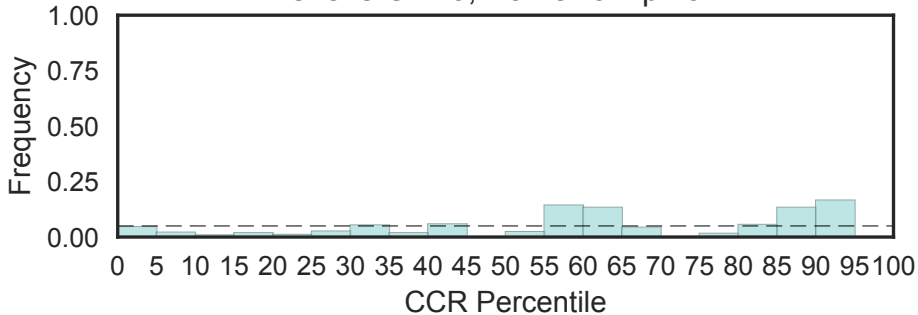

CAMSAP CH domain  
(CAMSAP\_CH, N=27)

Fisher's OR: 1.07; Bonferroni p-val: 1

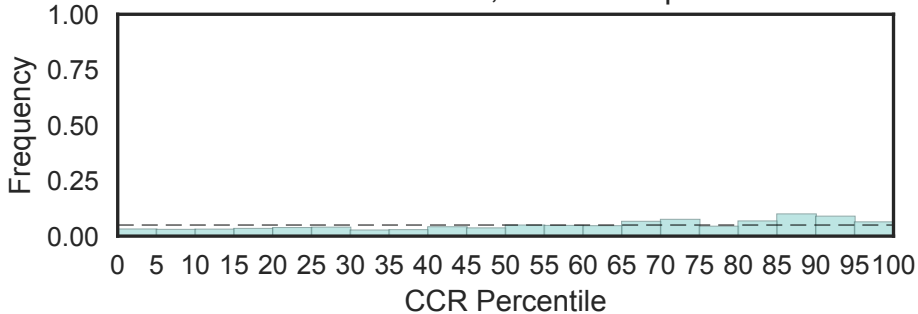

Microtubule-binding calmodulin-regulated spectrin-associated  
(CAMSAP\_CKK, N=3)

Fisher's OR: 3.77; Bonferroni p-val: 1

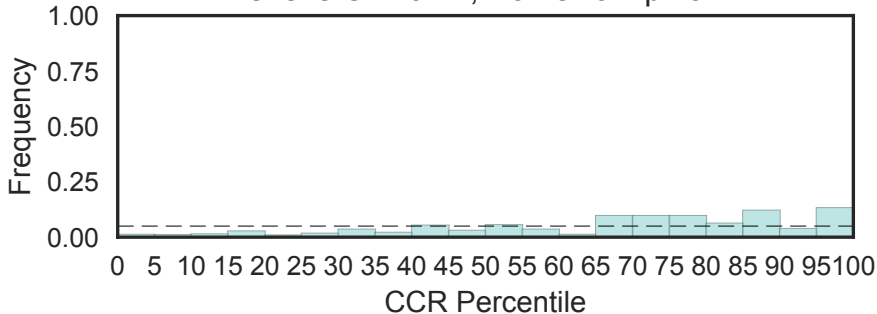

Cysteine-rich secretory protein family  
(CAP, N=16)

Fisher's OR: 0.129; Bonferroni p-val: 1

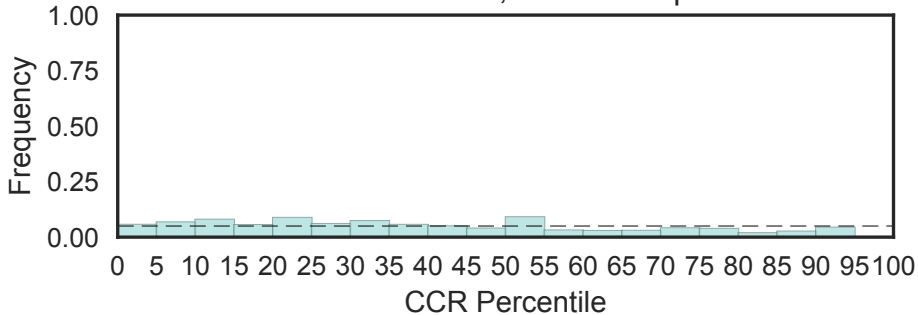



WASH complex subunit CAP-Z interacting, central region  
(CAP-ZIP\_m, N=4)

Fisher's OR: 0; Bonferroni p-val: 1

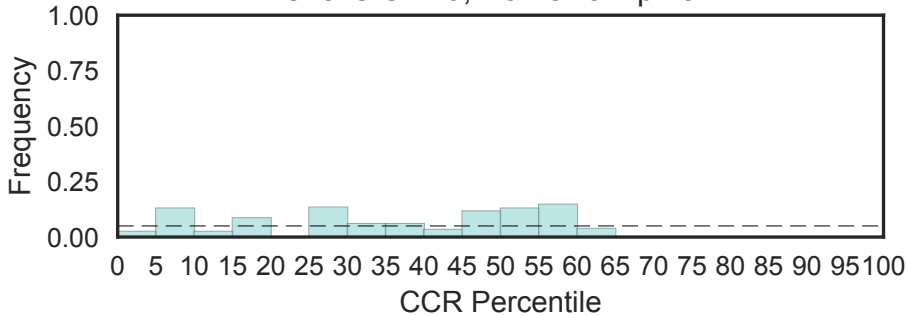

LPS binding domain of CAP18 (C terminal)  
(CAP18\_C, N=1)

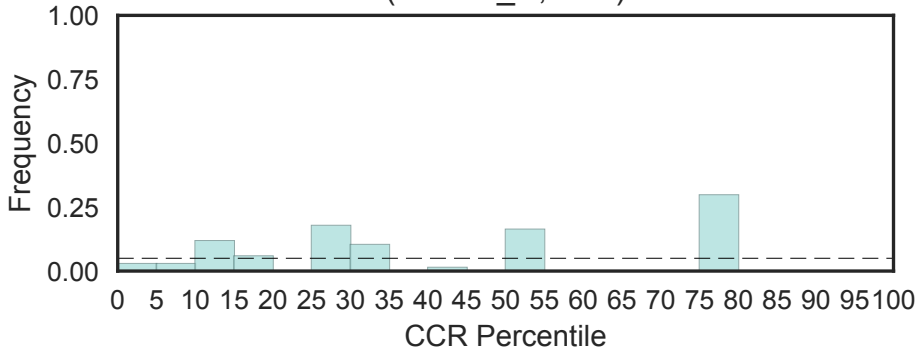

Adenylate cyclase associated (CAP) C terminal  
(CAP\_C, N=2)

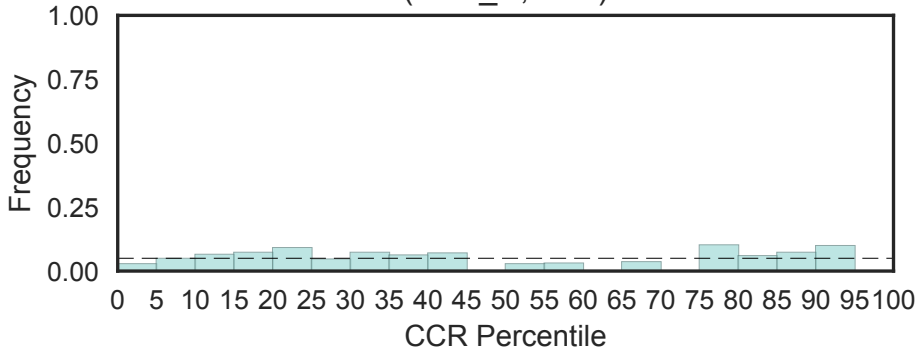

CAP-Gly domain  
(CAP\_GLY, N=16)

Fisher's OR: 0.946; Bonferroni p-val: 1

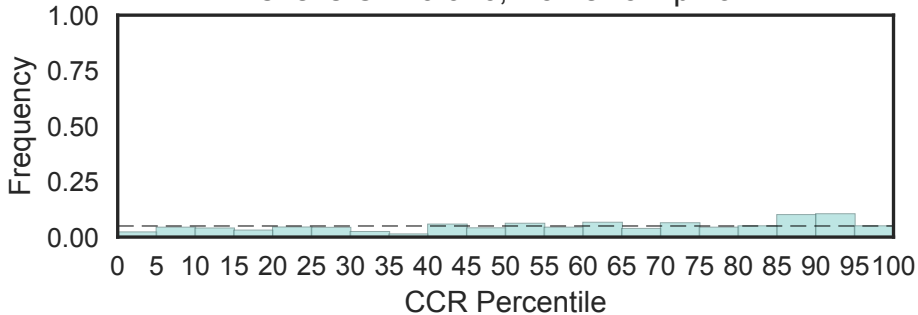

Adenylate cyclase associated (CAP) N terminal  
(CAP\_N, N=2)

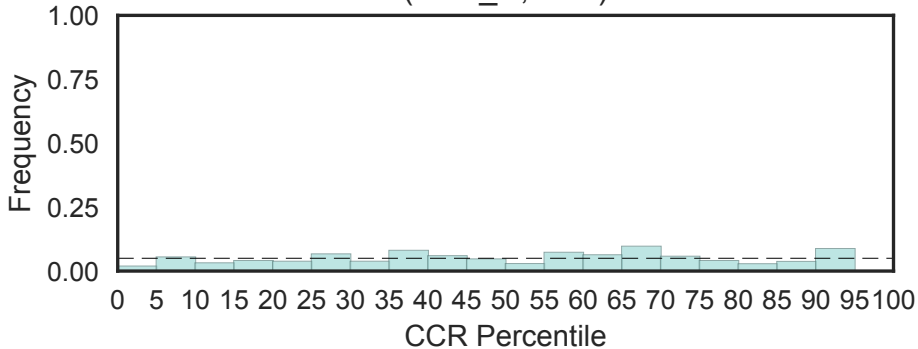

Caspase recruitment domain  
(CARD, N=28)

Fisher's OR: 0.724; Bonferroni p-val: 1

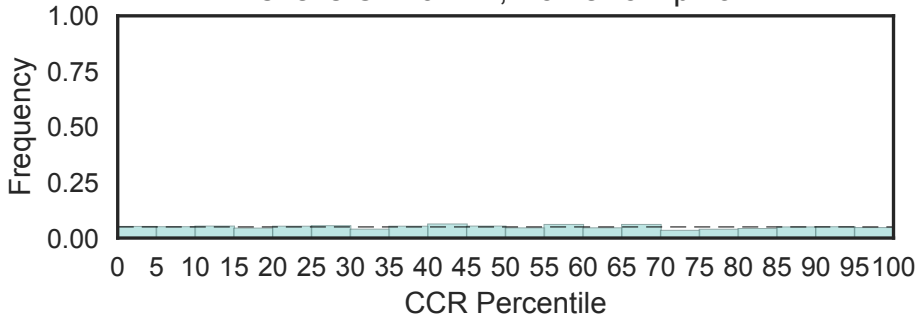

Caspase recruitment domain  
(CARD\_2, N=6)

Fisher's OR: 0; Bonferroni p-val: 1

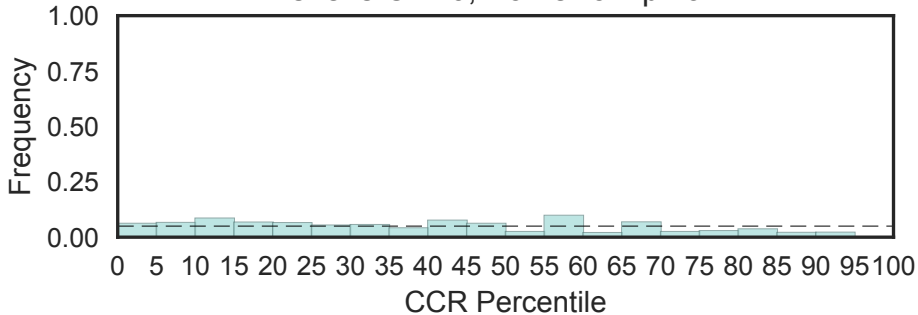

# Coactivator-associated arginine methyltransferase 1 N terminal (CARM1, N=1)

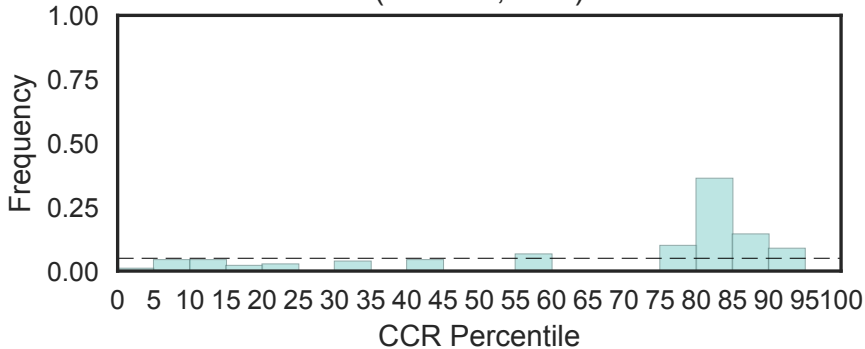



CARMIL C-terminus  
(CARMIL\_C, N=3)

Fisher's OR: 1.17; Bonferroni p-val: 1

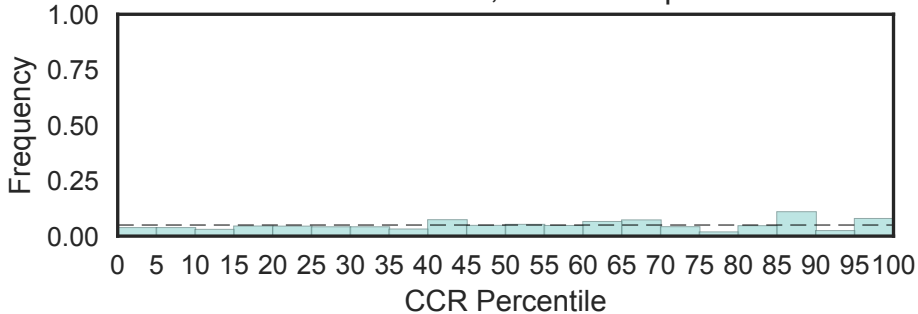

# Cocaine and amphetamine regulated transcript protein (CART) (CART, N=1)

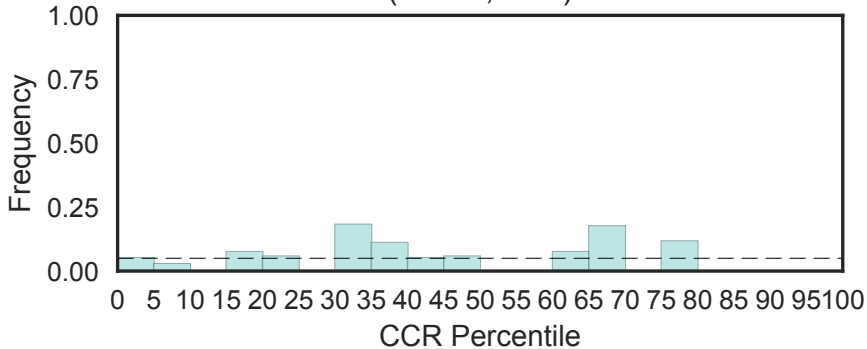

CASP C terminal  
(CASP\_C, N=1)

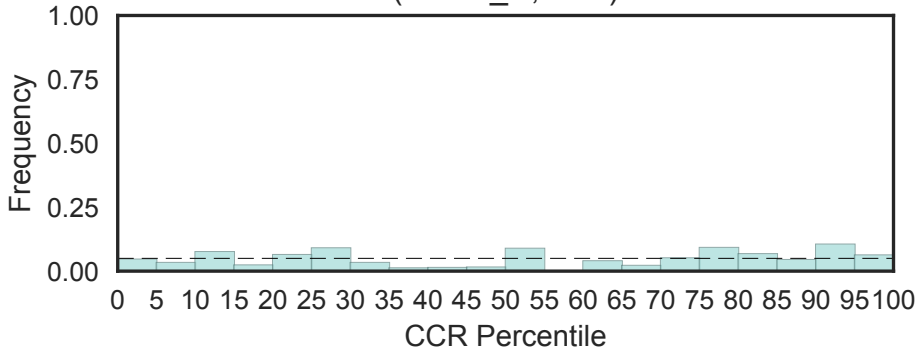

CAS/CSE protein, C-terminus  
(CAS\_CSE1, N=2)

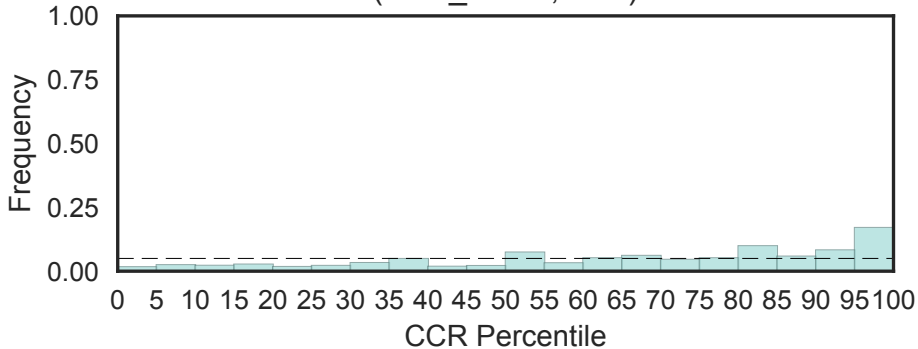

Cation channel sperm-associated protein subunit beta protein family  
(CATSPERB, N=1)

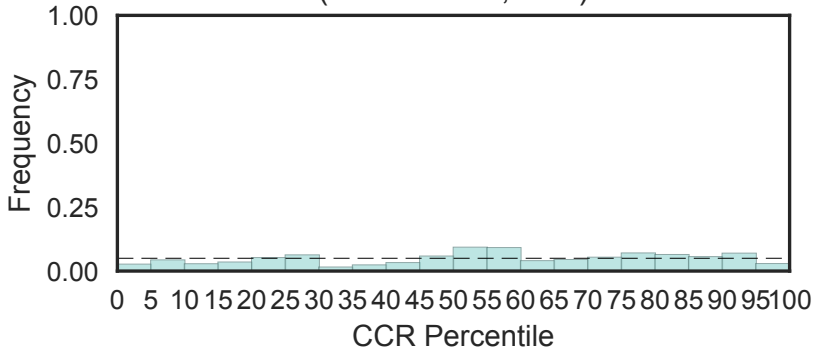

Cation channel sperm-associated protein subunit delta  
(CATSPERD, N=2)

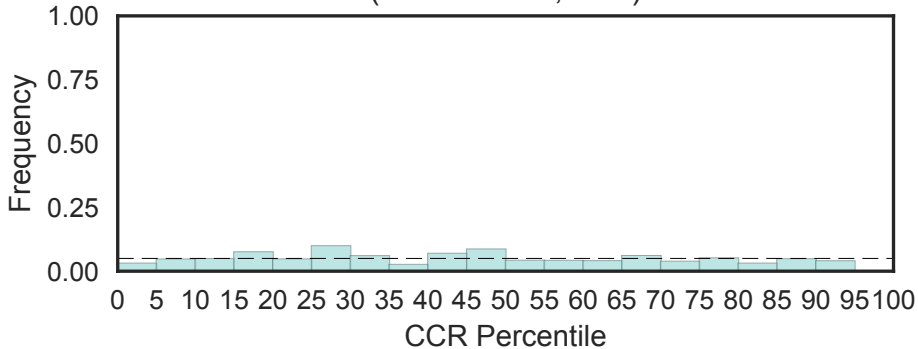

# Cation channel sperm-associated protein subunit gamma (CATSPERG, N=1)

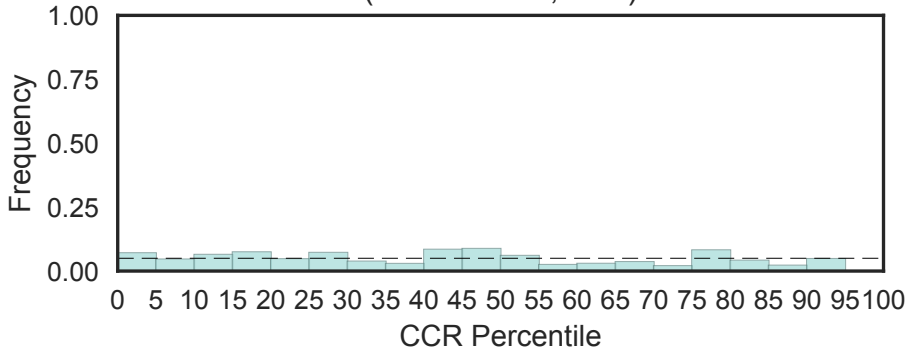

Linear amide C-N hydrolases, choloylglycine hydrolase family  
(CBAH, N=2)

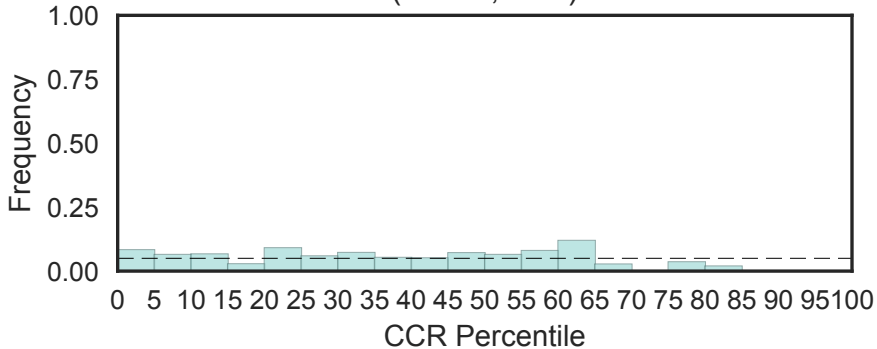



CBF/Mak21 family  
(CBF, N=3)

Fisher's OR: 0; Bonferroni p-val: 1

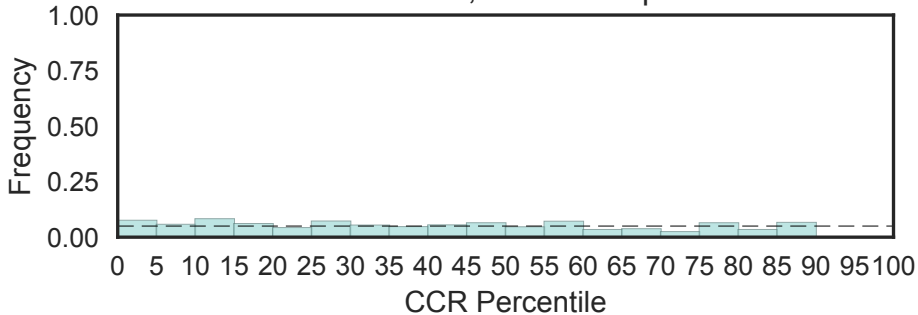

CCAAT-binding transcription factor (CBF-B/NF-YA) subunit B  
(CBFB\_NFYA, N=1)

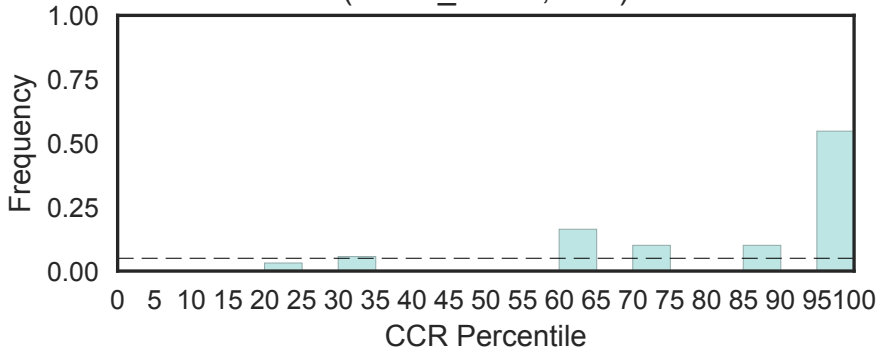

Histone-like transcription factor (CBF/NF-Y) and archaeal histone  
(CBFD\_NFYB\_HMF, N=46)

Fisher's OR: 1.11; Bonferroni p-val: 1

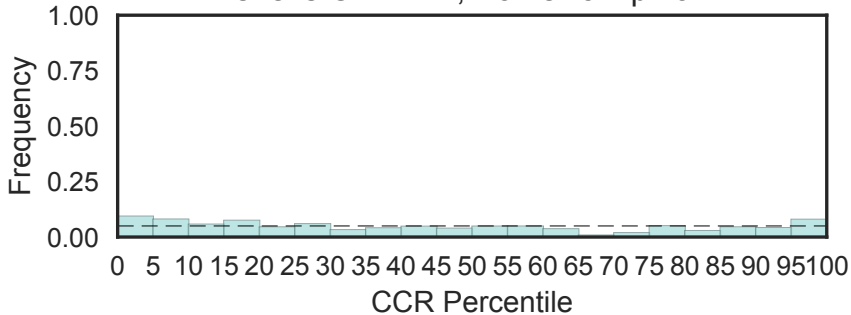

CBFNT (NUC161) domain  
(CBFNT, N=2)

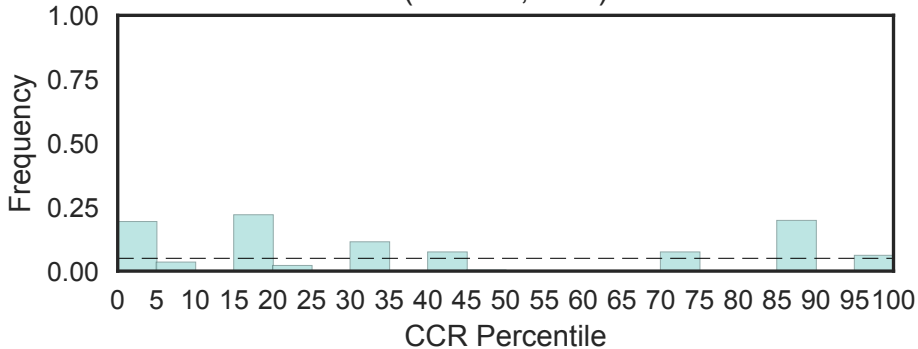

Core binding factor beta subunit  
(CBF\_beta, N=1)

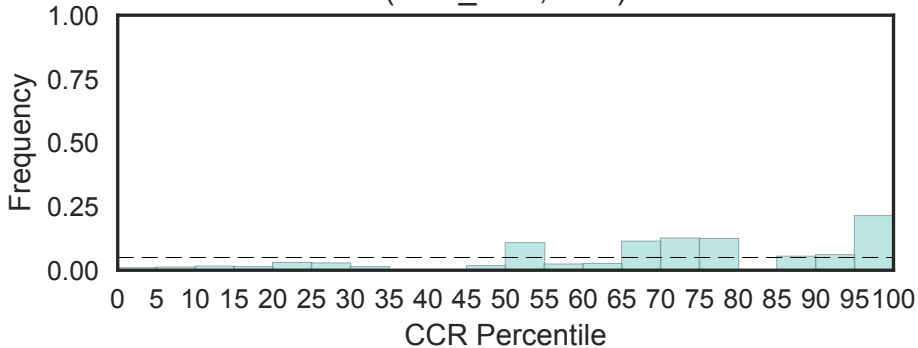

Starch/carbohydrate-binding module (family 53)  
(CBM53, N=6)

Fisher's OR: 0.611; Bonferroni p-val: 1

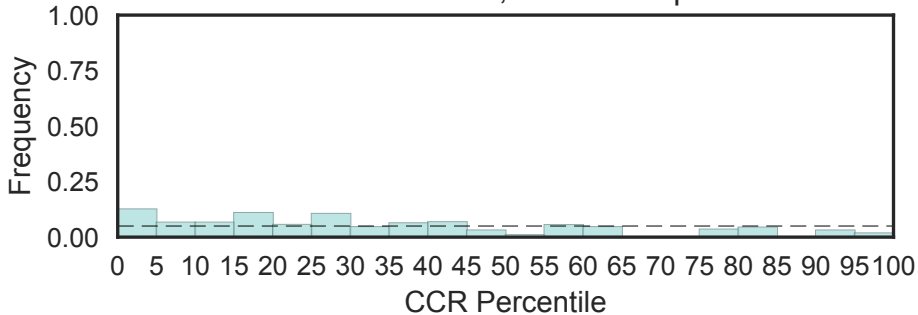

Chitin binding Peritrophin-A domain  
(CBM\_14, N=2)

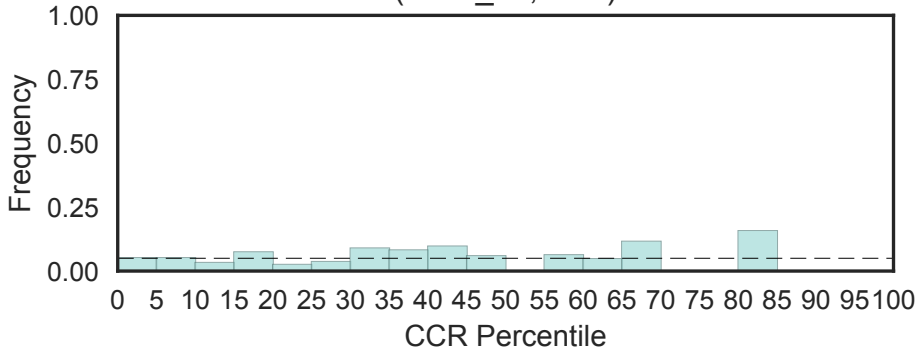

Starch binding domain  
(CBM\_20, N=3)

Fisher's OR: 0; Bonferroni p-val: 1

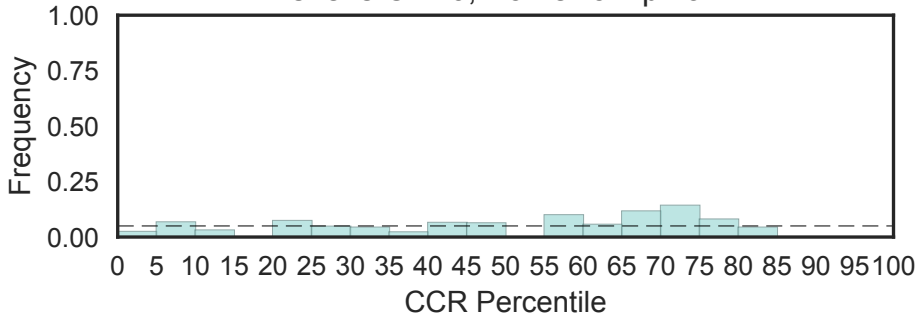



Carbohydrate/starch-binding module (family 21)  
(CBM\_21, N=6)

Fisher's OR: 0.48; Bonferroni p-val: 1

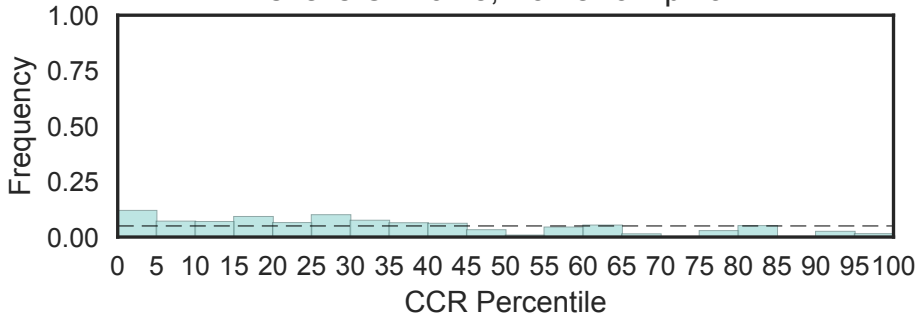

# Carbohydrate-binding module 48 (Isoamylase N-terminal domain) (CBM\_48, N=1)

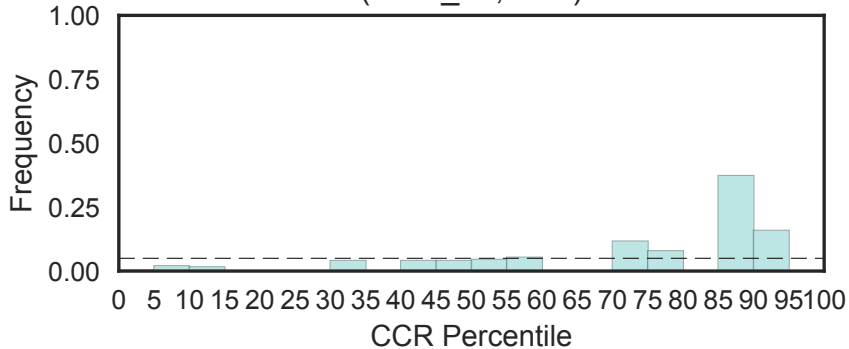

CBS domain  
(CBS, N=26)

Fisher's OR: 1.68; Bonferroni p-val: 1

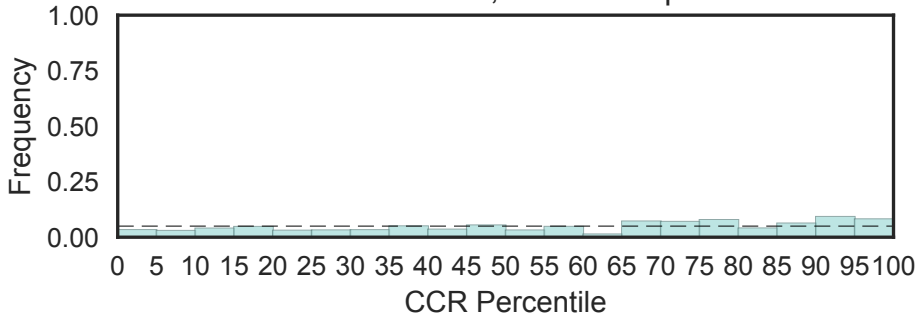

CBX family C-terminal motif  
(CBX7\_C, N=5)

Fisher's OR: 2.64; Bonferroni p-val: 1

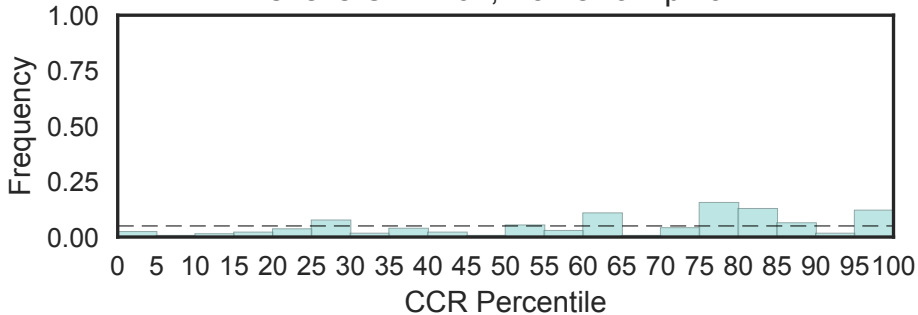

Coiled-coil domain-containing protein 190  
(CC190, N=1)

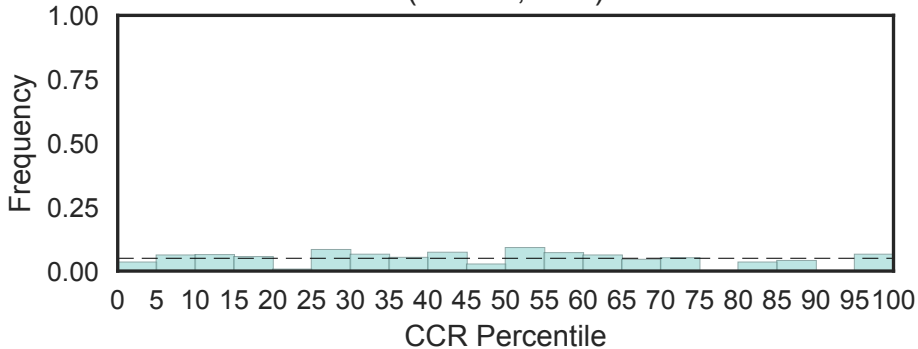

Leucine zipper of domain CC2 of NEMO, NF-kappa-B essential modulator  
(CC2-LZ, N=3)

Fisher's OR: 0; Bonferroni p-val: 1

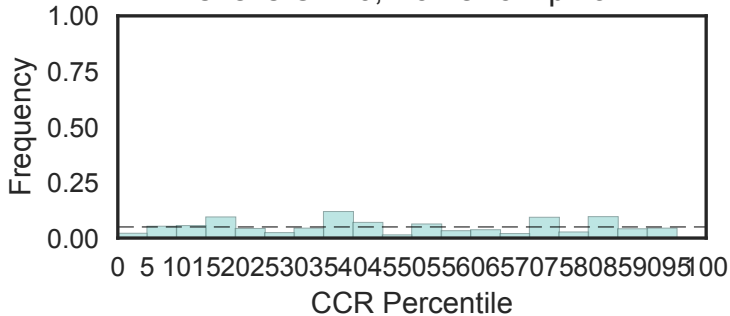

CC2D2A N-terminal C2 domain  
(CC2D2AN-C2, N=1)

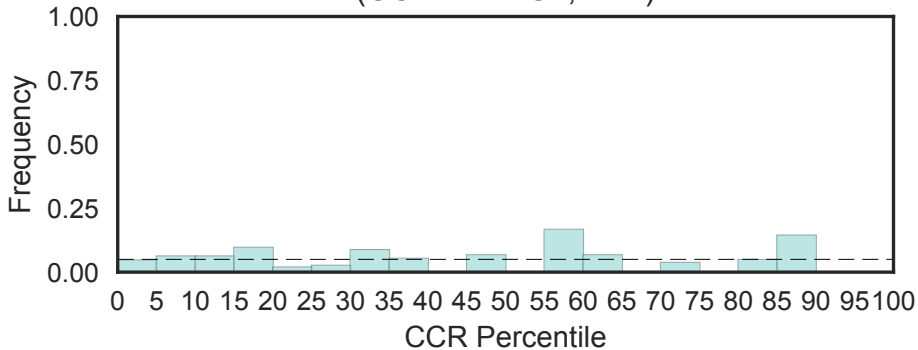

# Centrosomal colon cancer autoantigen protein family (CCCAP, N=2)

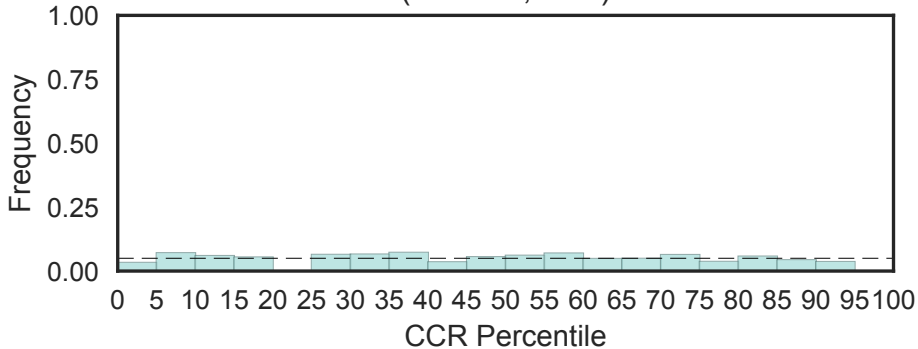



Coiled-coil domain-containing protein 48  
(CCD48, N=1)

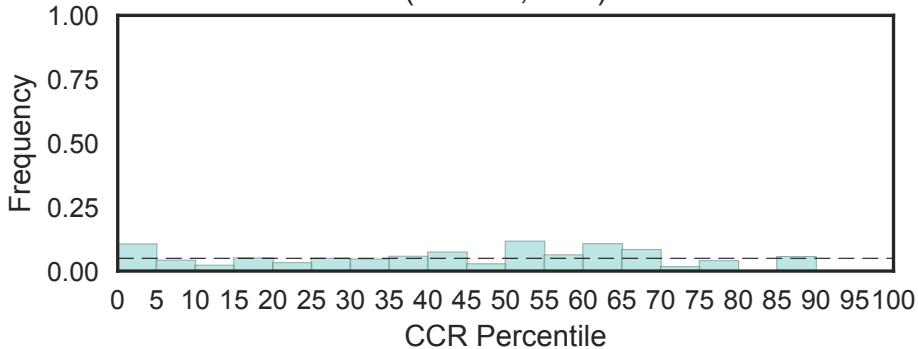

Coiled-coil domain-containing protein 167  
(CCDC-167, N=1)

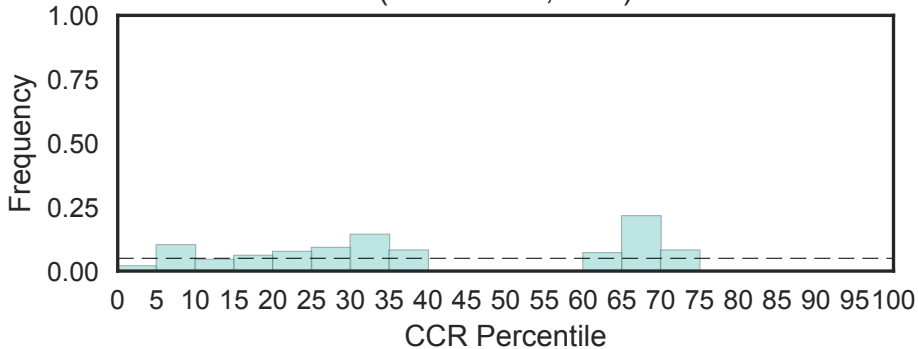

Coiled-coil domain-containing protein 106  
(CCDC106, N=1)

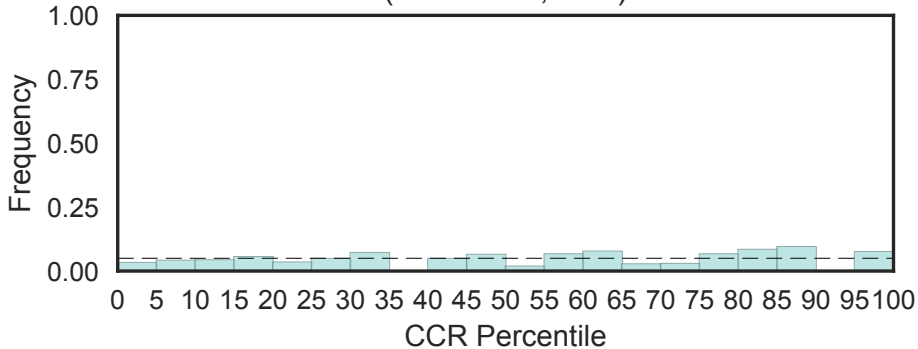

Coiled-coil domain-containing protein 117  
(CCDC117, N=1)

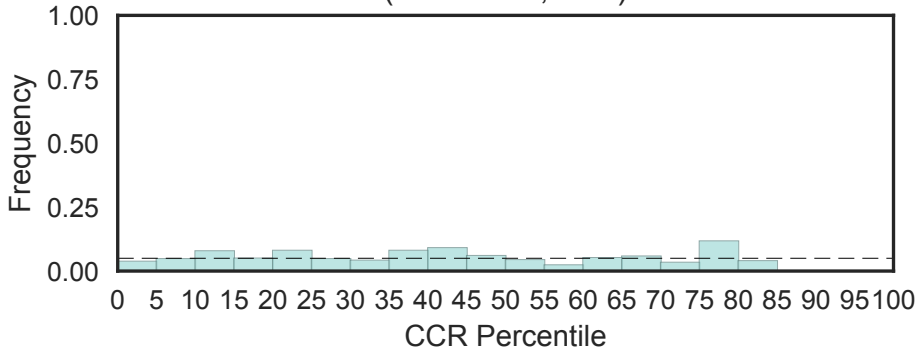

Coiled-coil domain-containing protein 14  
(CCDC14, N=2)

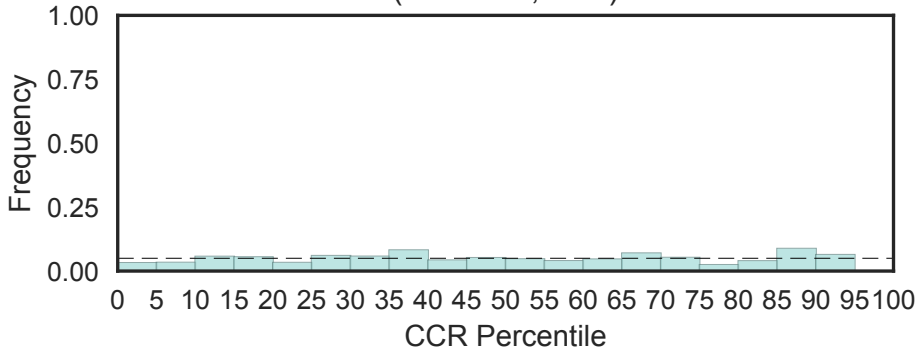

Coiled-coil protein 142  
(CCDC142, N=1)

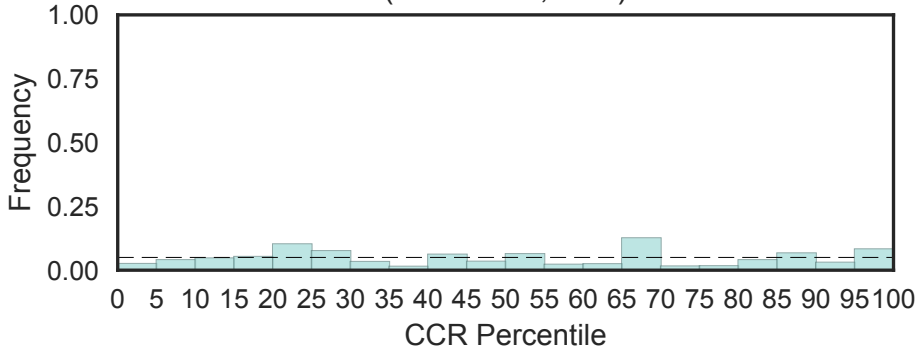

CCDC144C protein coiled-coil region  
(CCDC144C, N=18)

Fisher's OR: 0.851; Bonferroni p-val: 1

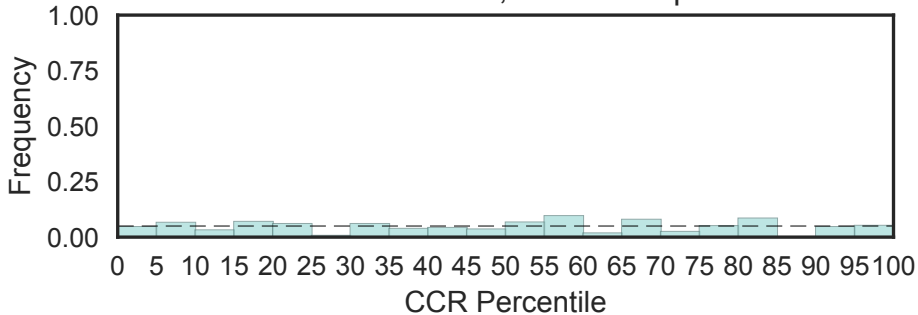

Coiled-coil domain-containing protein 154  
(CCDC154, N=1)

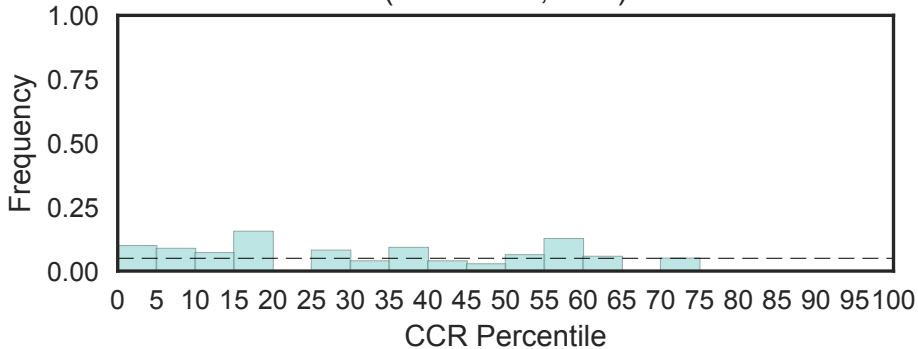



Coiled-coil domain-containing protein 158  
(CCDC158, N=1)

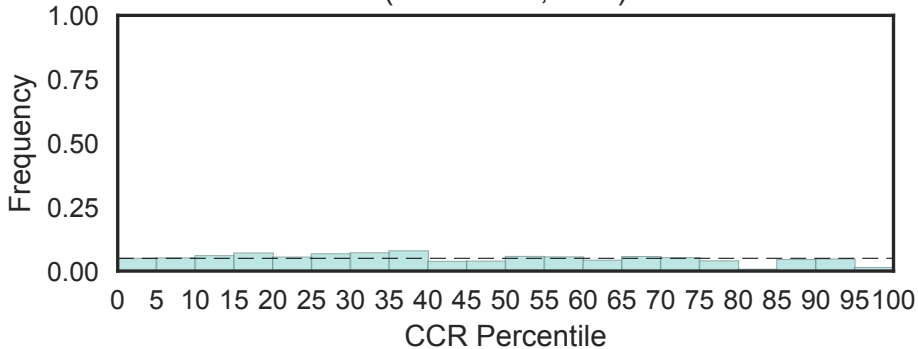

Coiled-coil domain-containing protein 168  
(CCDC168\_N, N=5)

Fisher's OR: 0; Bonferroni p-val: 1

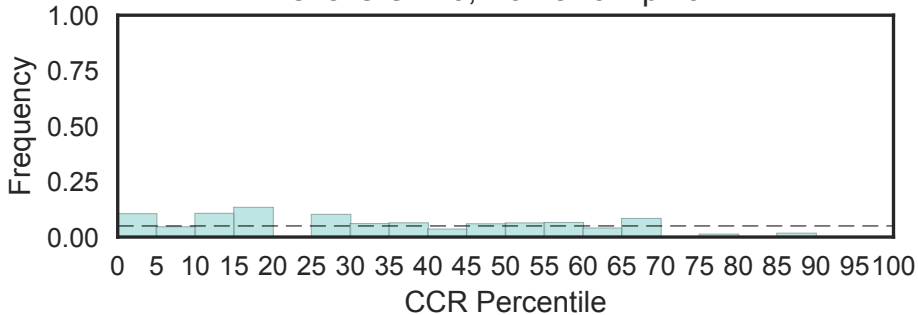

Coiled-coil domain-containing protein 23  
(CCDC23, N=1)

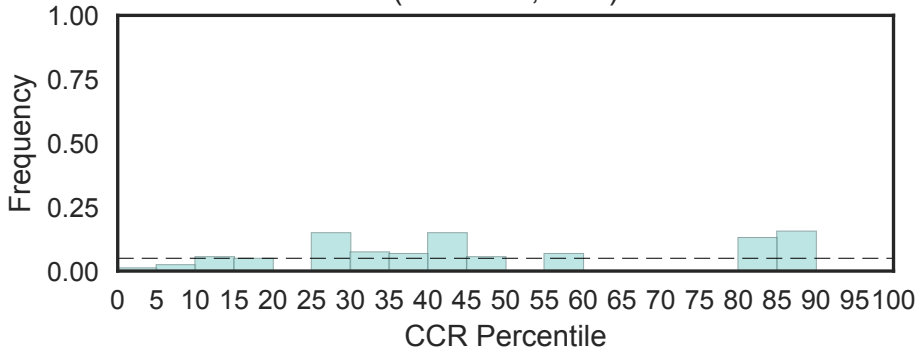

Coiled-coil domain-containing protein 24 family  
(CCDC24, N=2)

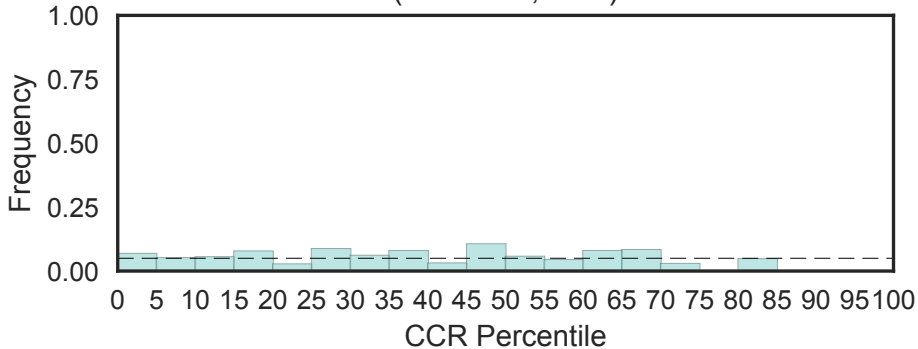

Coiled-coil domain containing 32  
(CCDC32, N=1)

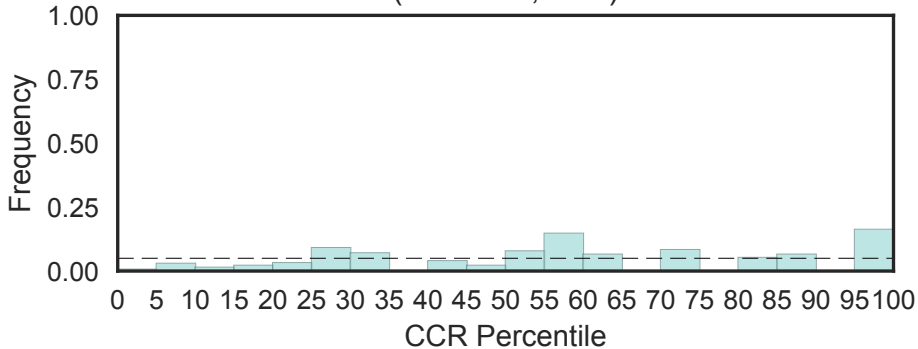

Coiled-coil domain-containing protein 50 N-terminus  
(CCDC50\_N, N=1)

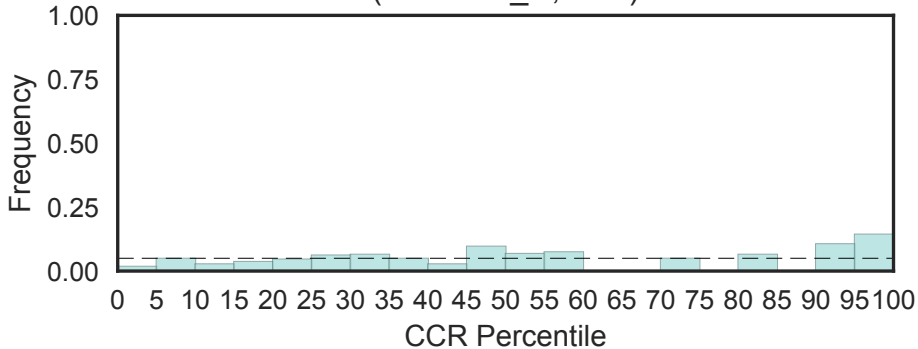

Subunit CCDC53 of WASH complex  
(CCDC53, N=1)

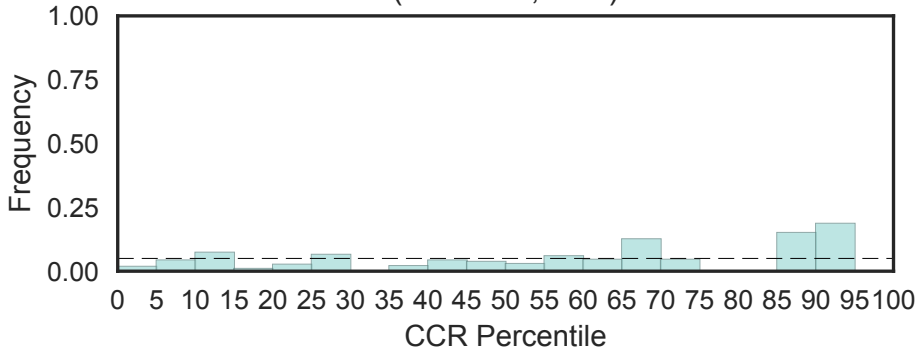

Coiled-coil domain-containing protein 66  
(CCDC66, N=2)

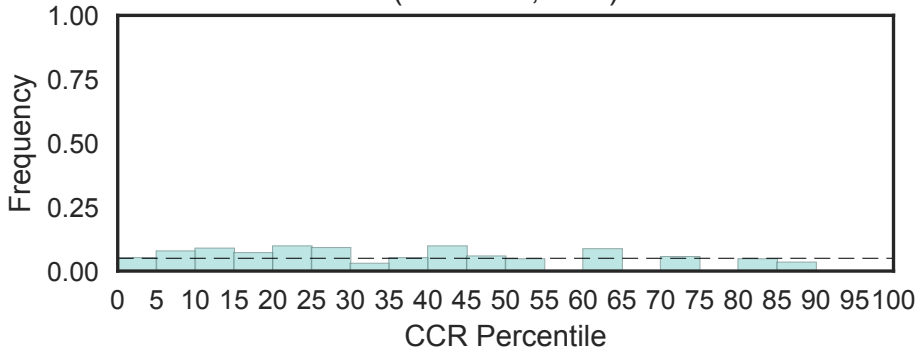



Coiled-coil domain-containing protein 71L  
(CCDC71L, N=2)

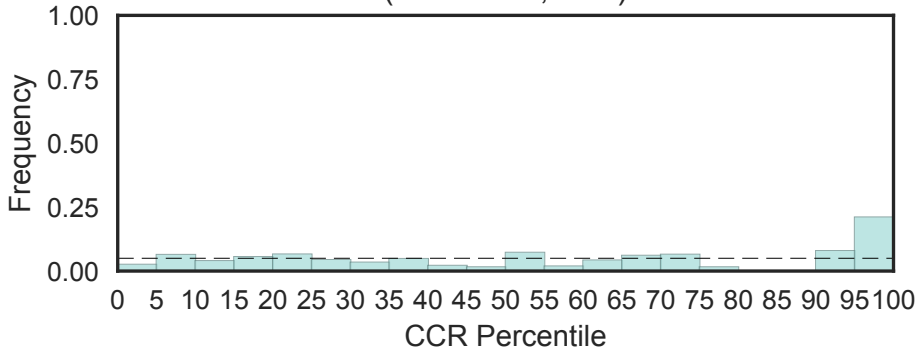

Coiled-coil domain-containing protein 73 family  
(CCDC73, N=1)

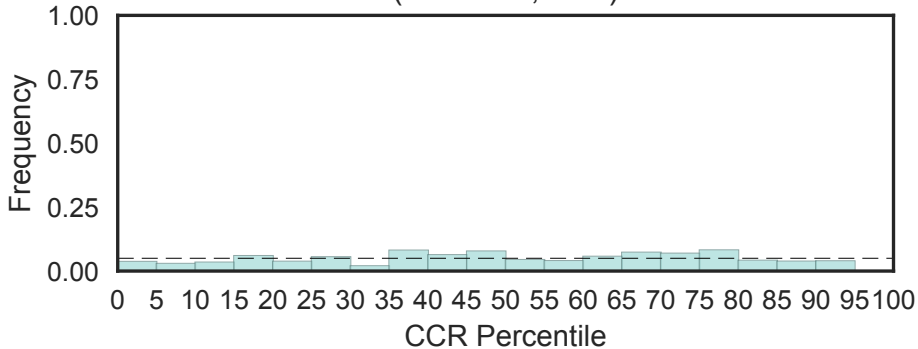

Coiled coil protein 84  
(CCDC84, N=1)

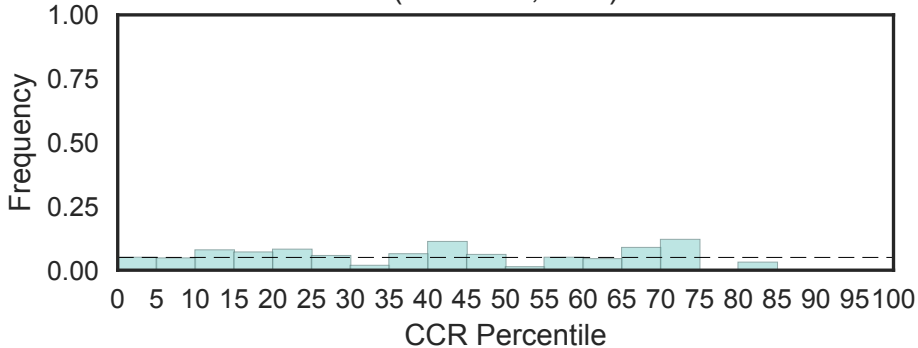

CCDC85 family  
(CCDC85, N=3)

Fisher's OR: 4.51; Bonferroni p-val: 1

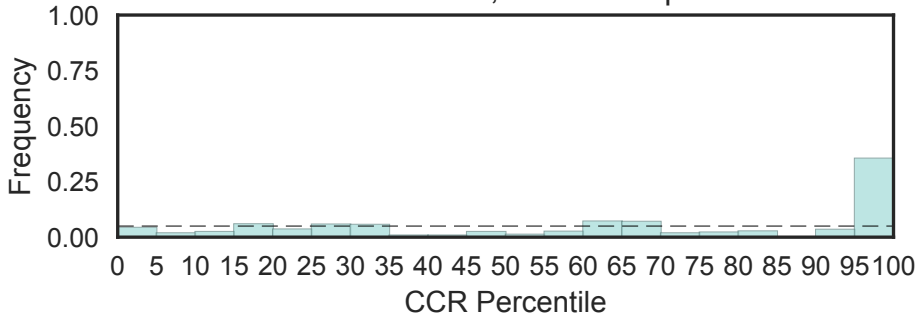

Coiled-coil domain of unknown function  
(CCDC92, N=3)

Fisher's OR: 0; Bonferroni p-val: 1

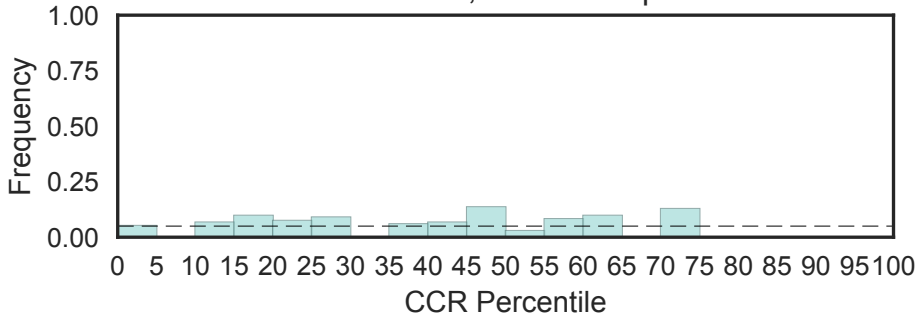

# Coiled-coil domain-containing glutamate-rich protein family 1 (CCER1, N=1)

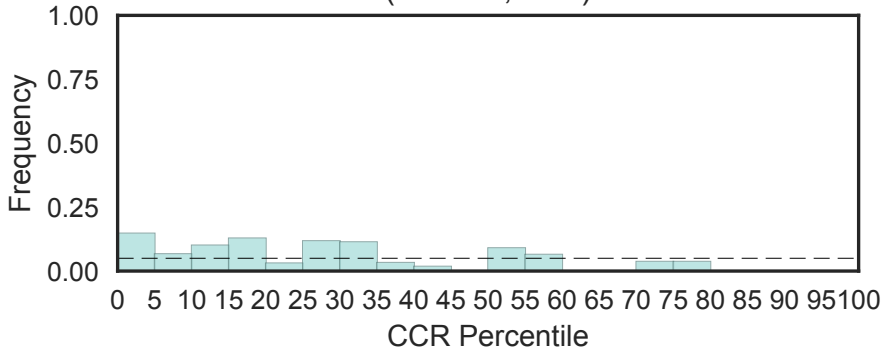

Cerebral cavernous malformation protein, harmonin-homology  
(CCM2\_C, N=2)

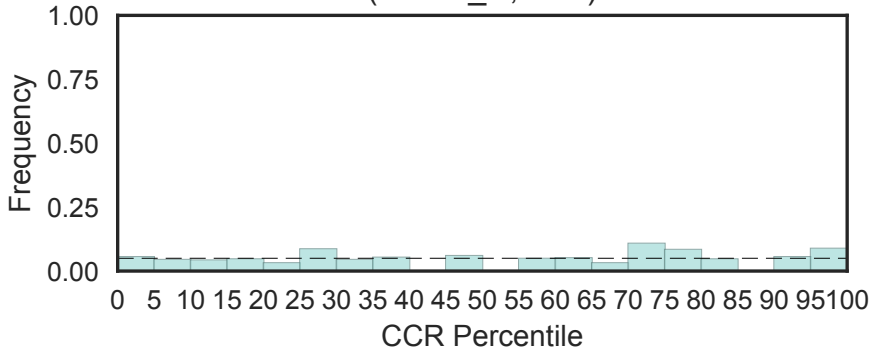

Centriole, cilia and spindle-associated  
(CCSAP, N=1)

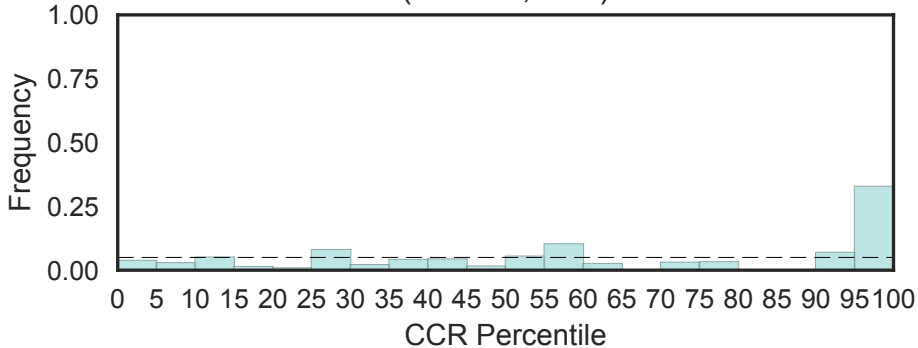



CCSMST1 family  
(CCSMST1, N=1)

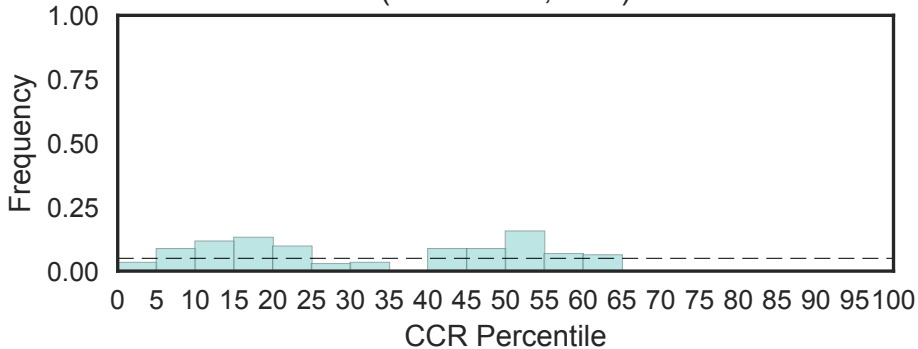

CD20-like family  
(CD20, N=20)

Fisher's OR: 0; Bonferroni p-val: 0.248

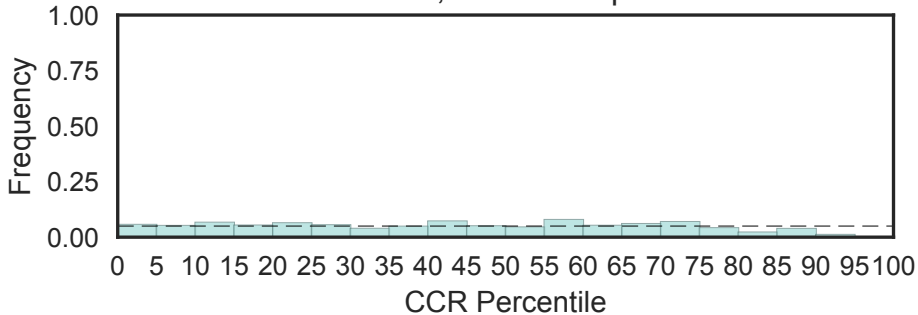

Interferon-induced transmembrane protein  
(CD225, N=14)

Fisher's OR: 0; Bonferroni p-val: 1

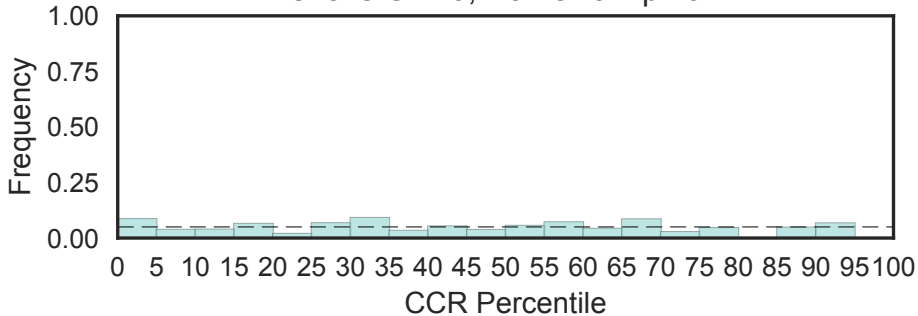

CD34/Podocalyxin family  
(CD34\_antigen, N=3)

Fisher's OR: 0.487; Bonferroni p-val: 1

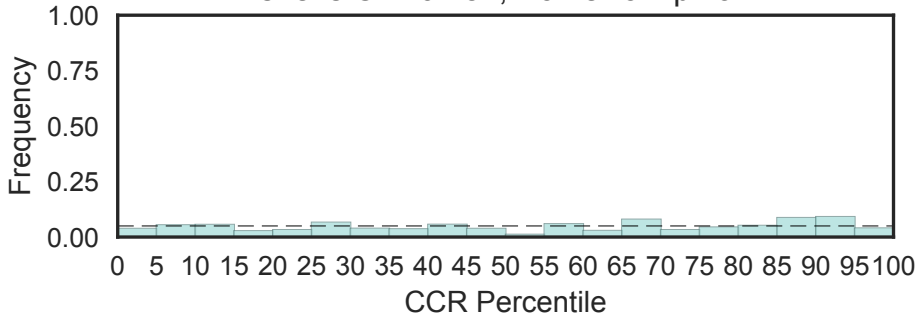

CD36 family  
(CD36, N=3)

Fisher's OR: 0.555; Bonferroni p-val: 1

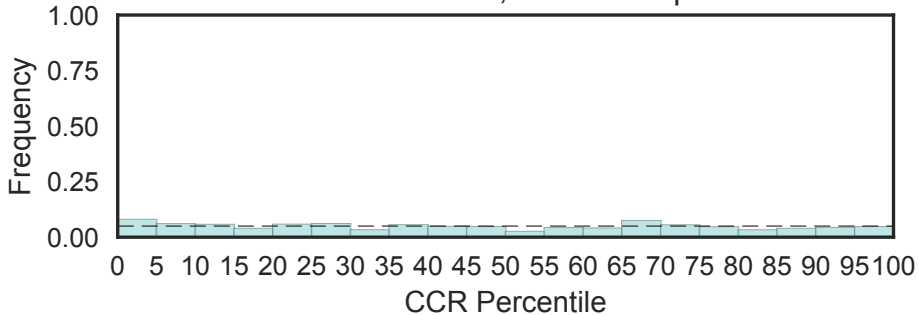

CD4, extracellular  
(CD4-extracel, N=1)

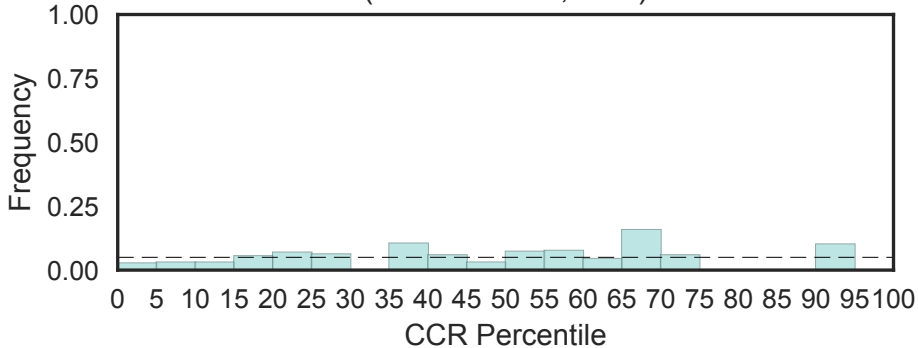

Leukocyte receptor CD45  
(CD45, N=1)

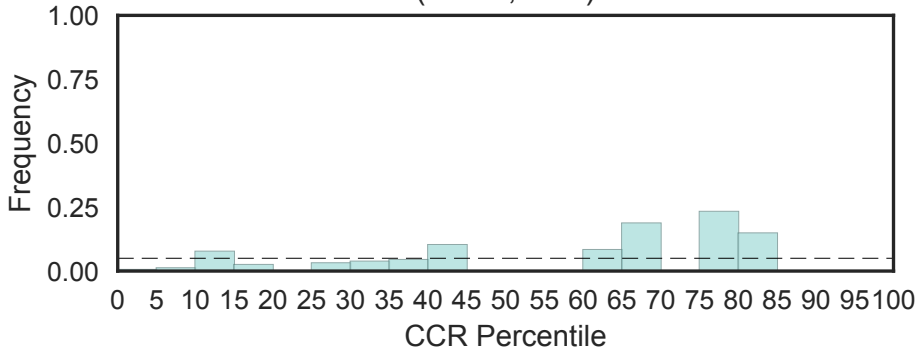

CD47 transmembrane region  
(CD47, N=1)

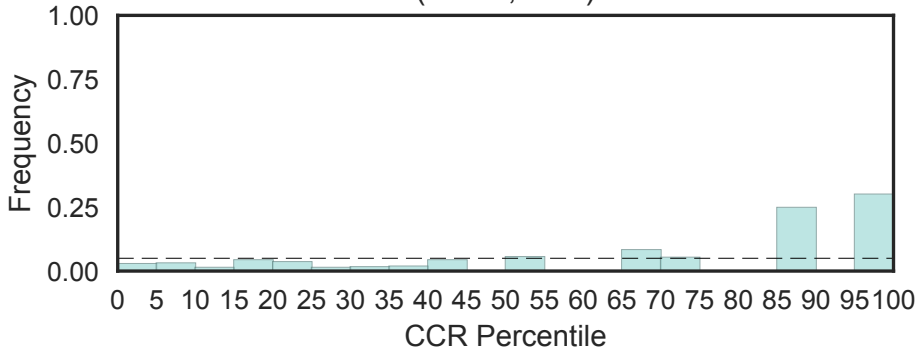



CAMPATH-1 antigen  
(CD52, N=1)

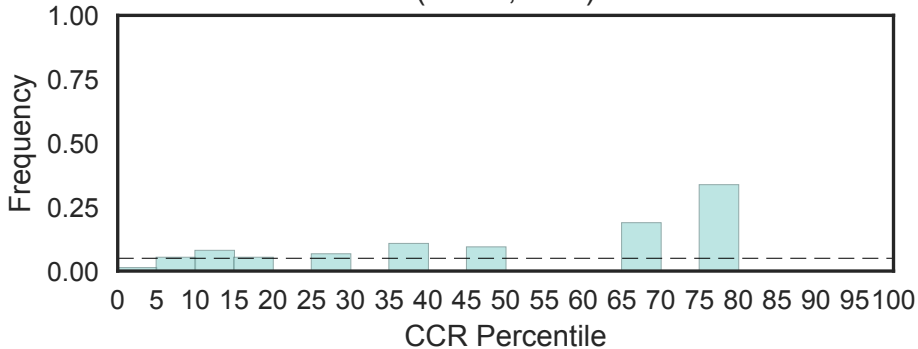

CDC24 Calponin  
(CDC24, N=2)

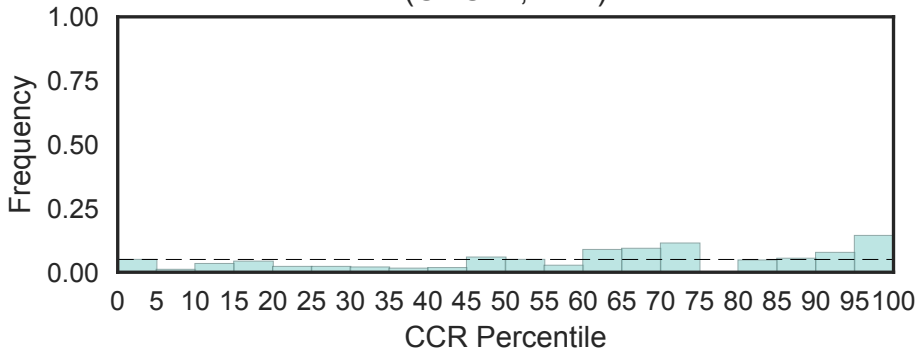

Cell division control protein 24, OB domain 3  
(CDC24\_OB3, N=2)

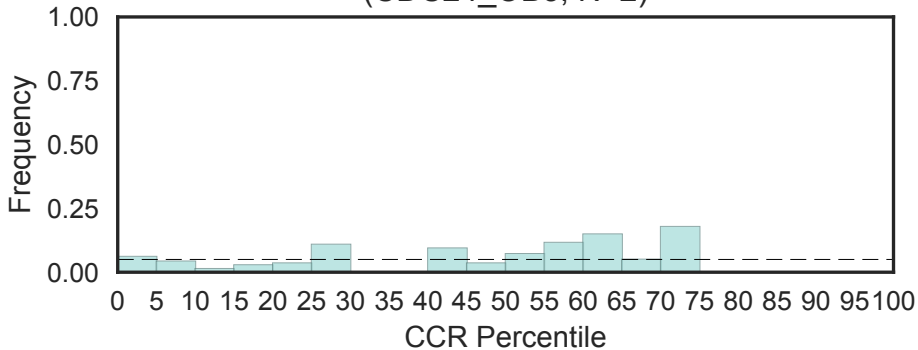

DNA polymerase subunit Cdc27  
(CDC27, N=1)

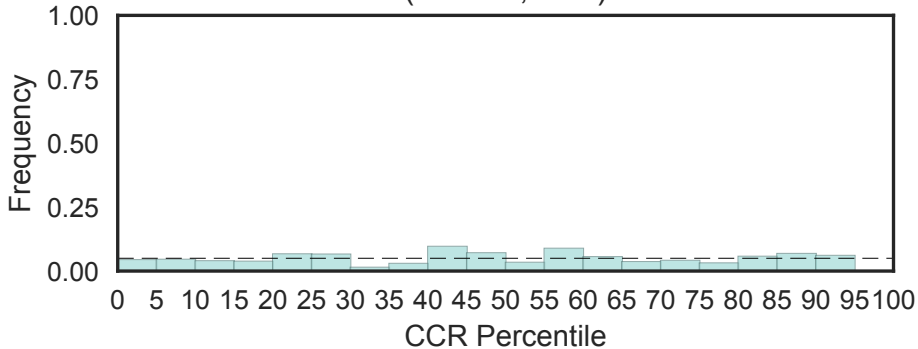

Cdc37 C terminal domain  
(CDC37\_C, N=1)

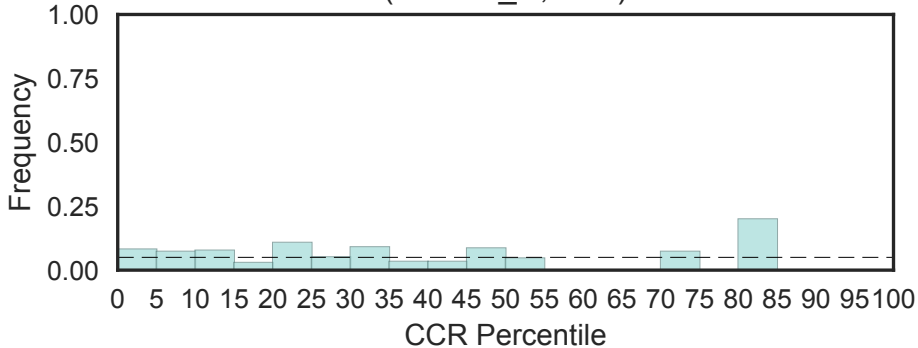

Cdc37 Hsp90 binding domain  
(CDC37\_M, N=2)

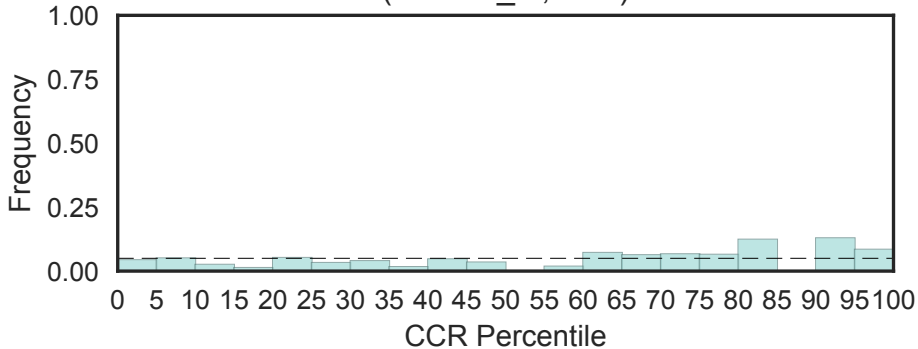

Cdc37 N terminal kinase binding  
(CDC37\_N, N=1)

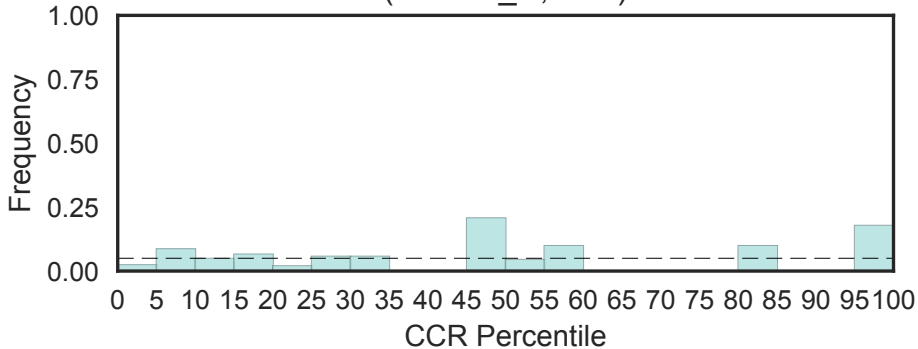

CDC45-like protein  
(CDC45, N=1)

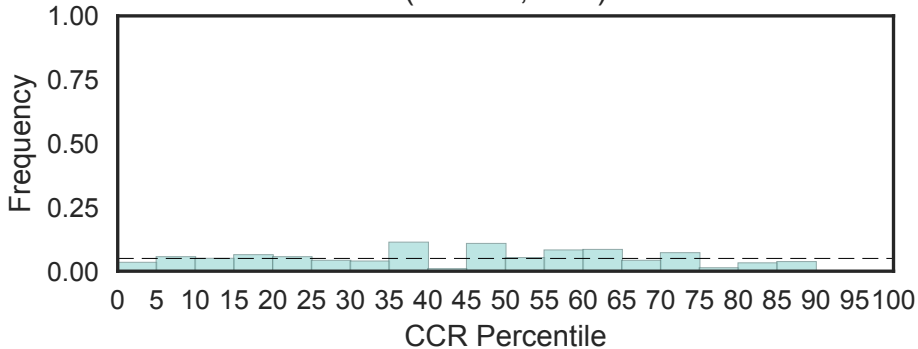



Cell division protein 48 (CDC48), domain 2  
(CDC48\_2, N=2)

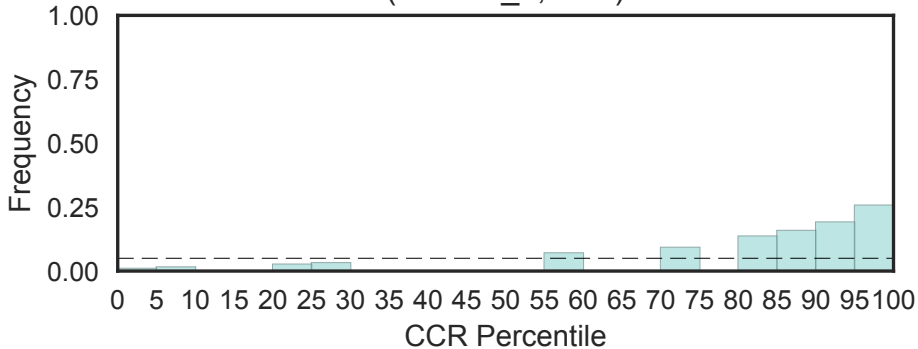

Cell division protein 48 (CDC48), N-terminal domain  
(CDC48\_N, N=2)

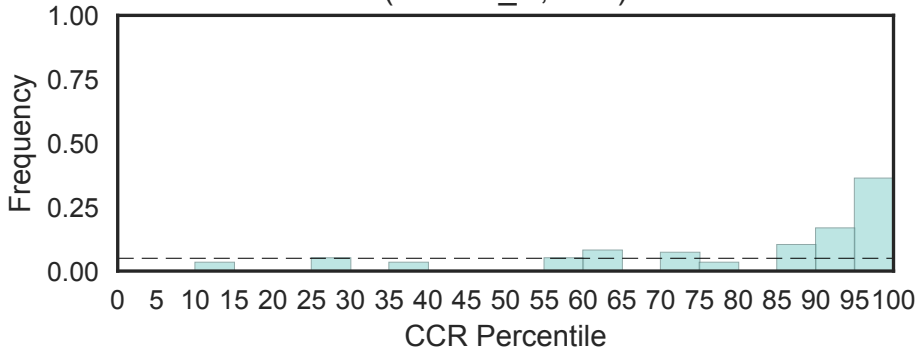

LEM3 (ligand-effect modulator 3) family / CDC50 family  
(CDC50, N=3)

Fisher's OR: 0; Bonferroni p-val: 1

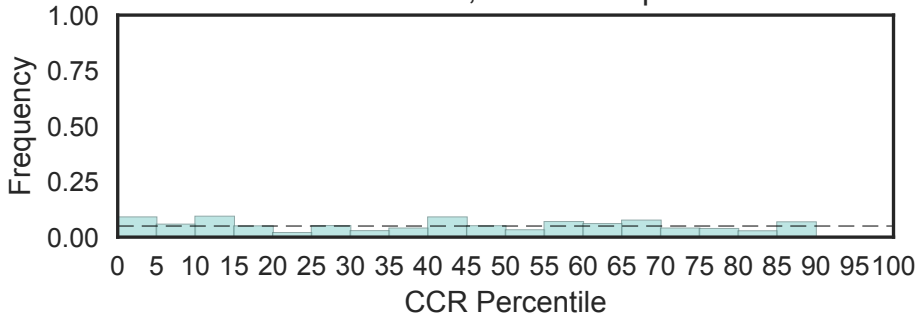

RNA pol II accessory factor, Cdc73 family, C-terminal  
(CDC73\_C, N=1)

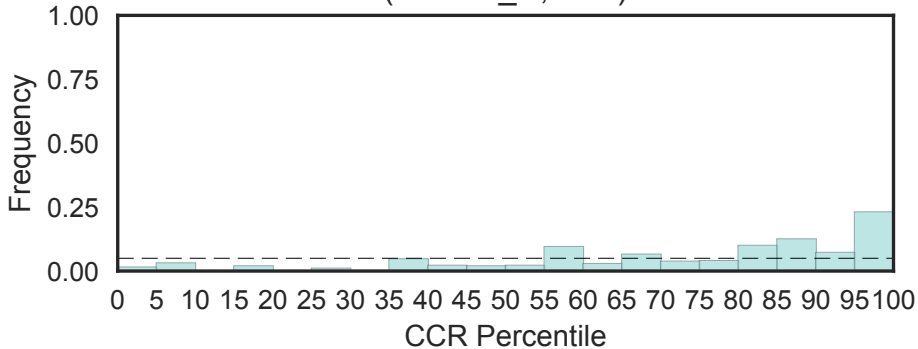

Paf1 complex subunit CDC73 N-terminal  
(CDC73\_N, N=1)

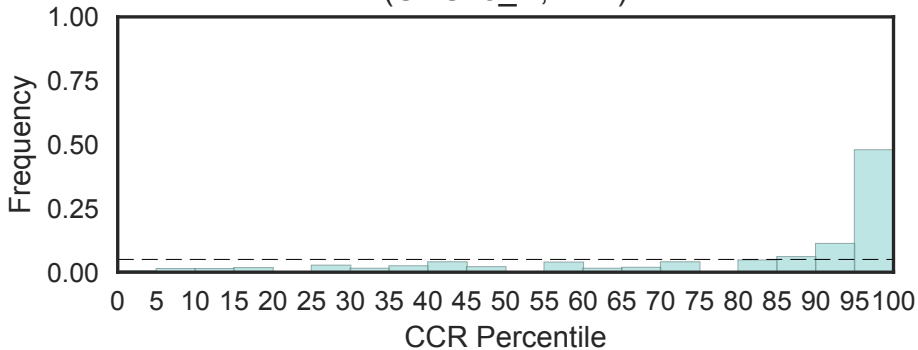

Cyclin-dependent kinase inhibitor  
(CDI, N=3)

Fisher's OR: 2.21; Bonferroni p-val: 1

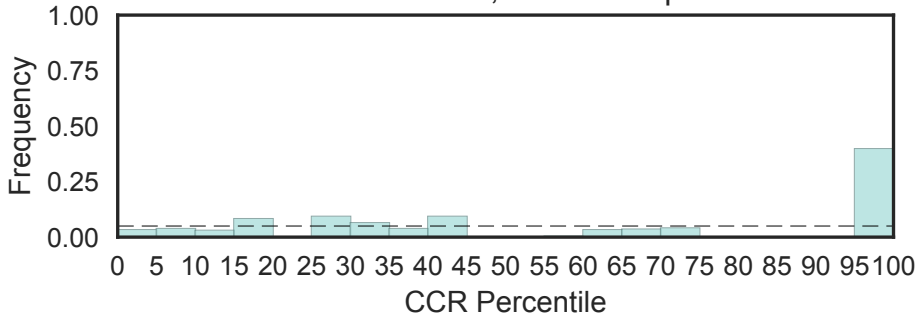

# Cyclin-dependent kinase 2-associated protein (CDK2AP, N=2)

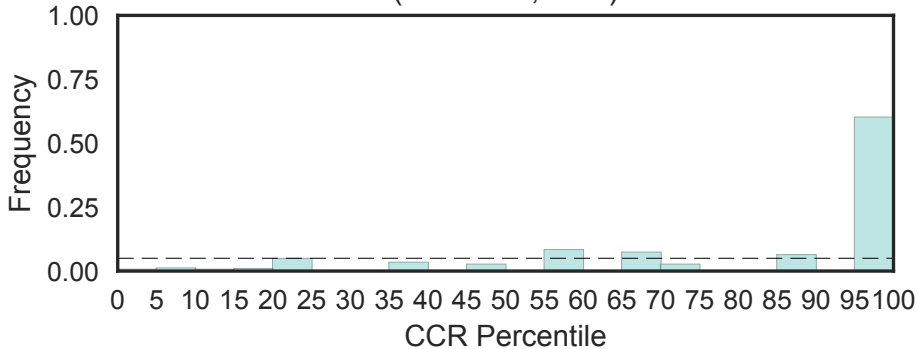

Cyclin-dependent kinase 5 activator protein  
(CDK5\_activator, N=2)

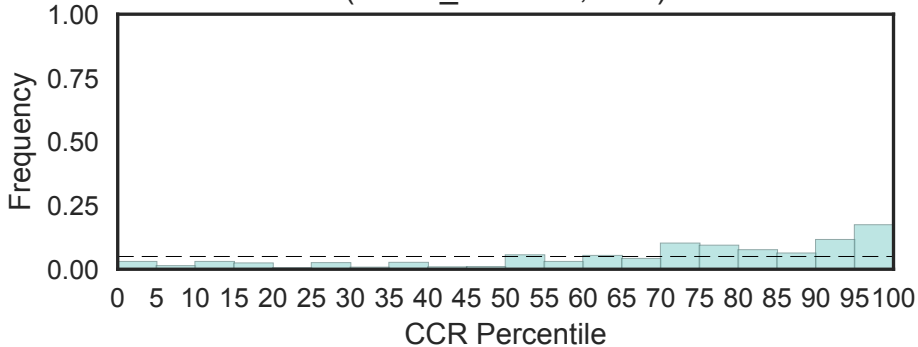



Cyclin-dependent kinase inhibitor 3 (CDKN3)  
(CDKN3, N=1)

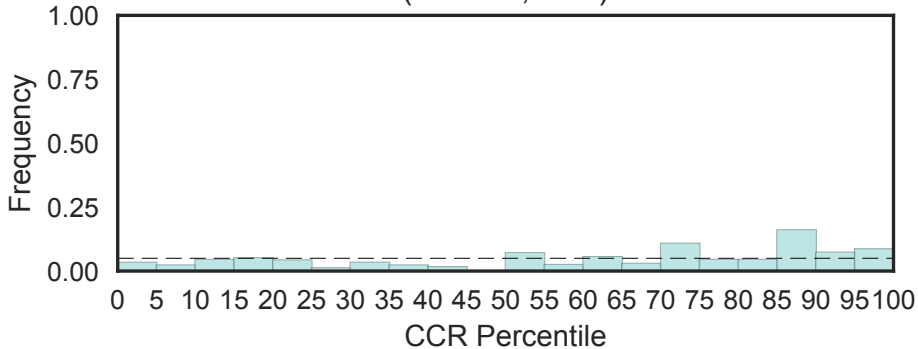

# Cysteine dioxygenase type I (CDO\_I, N=1)

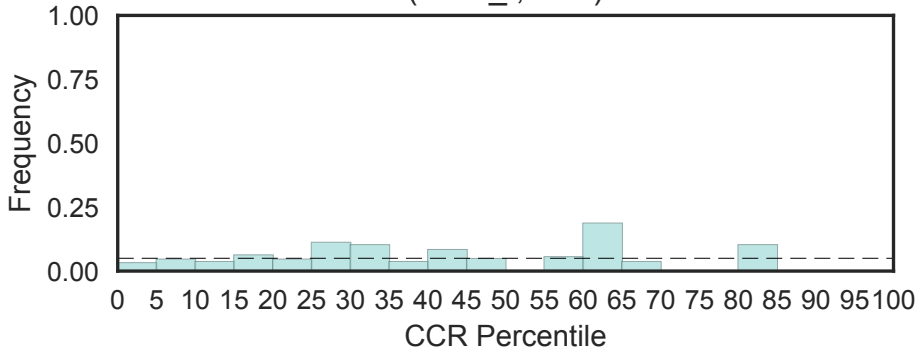

CDP-alcohol phosphatidyltransferase  
(CDP-OH\_P\_transf, N=5)

Fisher's OR: 2.33; Bonferroni p-val: 1

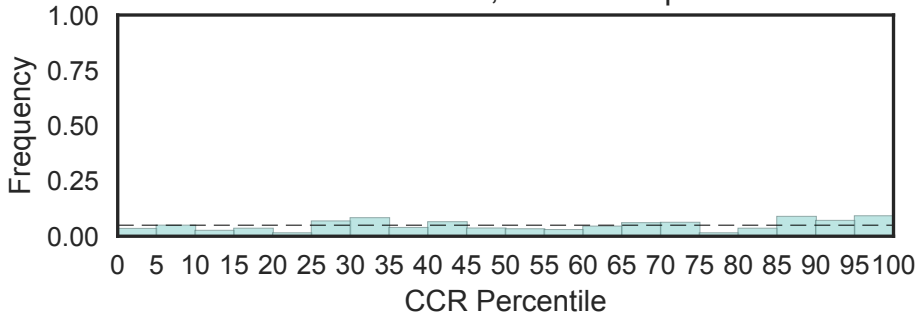

CMT1A duplicated region transcript 4 protein  
(CDRT4, N=2)

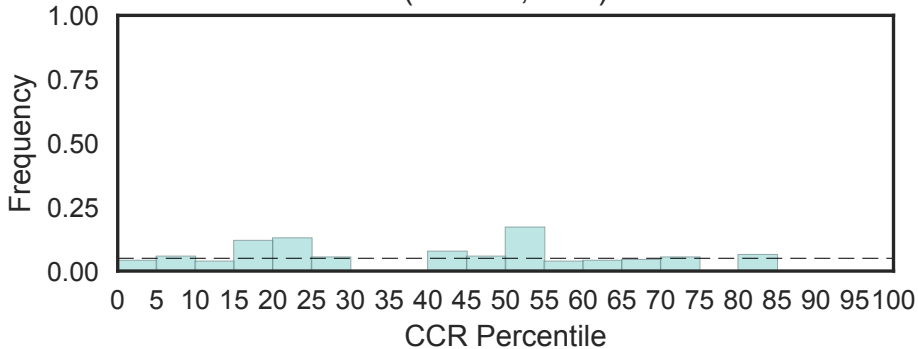

DNA replication factor CDT1 like  
(CDT1, N=1)

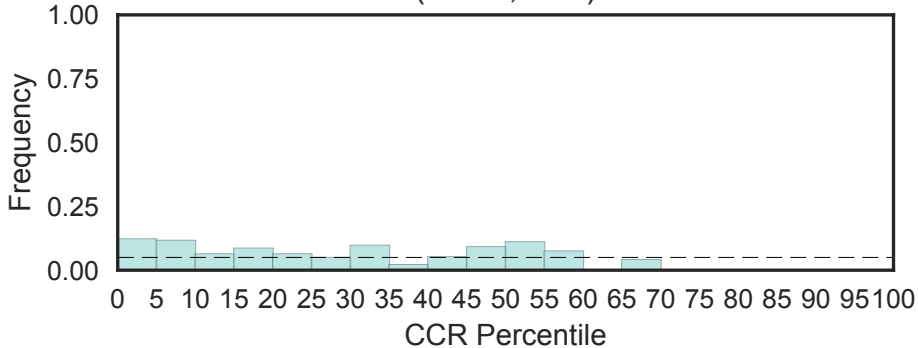

DNA replication factor Cdt1 C-terminal domain  
(CDT1\_C, N=1)

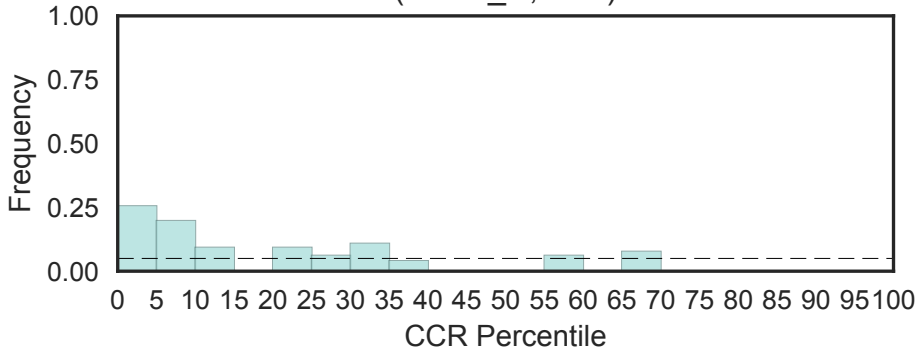

# Carnitine deficiency-associated protein 3 (CDV3, N=1)

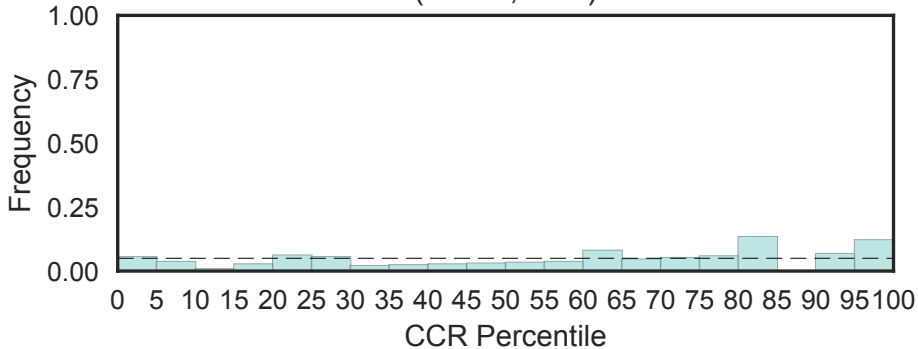

# Cytoplasmic polyadenylation element-binding protein 1 N-terminus (CEBP1\_N, N=3)

Fisher's OR: 0.735; Bonferroni p-val: 1

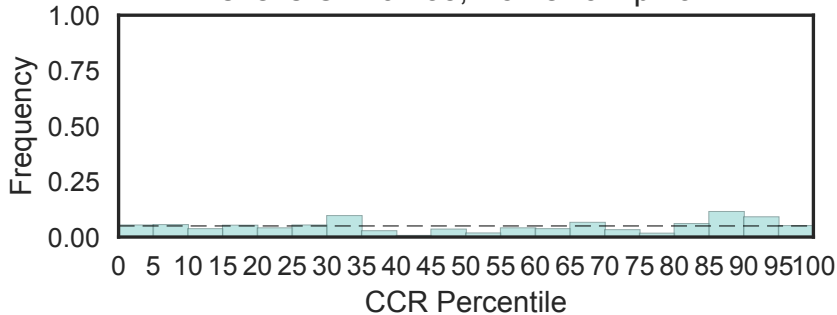



Cytoplasmic polyadenylation element-binding protein ZZ domain  
(CEBP\_ZZ, N=5)

Fisher's OR: 5.5; Bonferroni p-val: 1

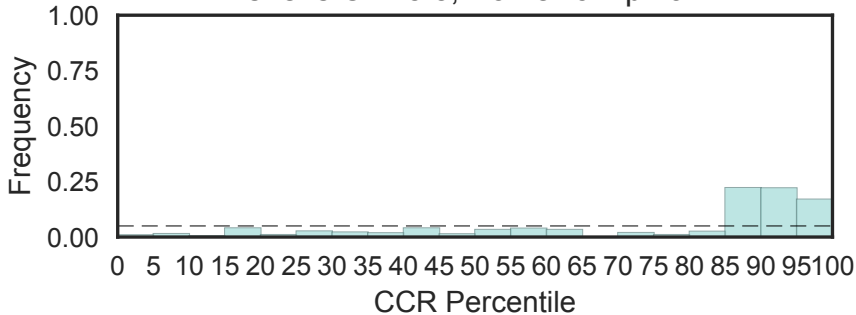

CECR6/TMEM121 family  
(CECR6\_TM121, N=2)

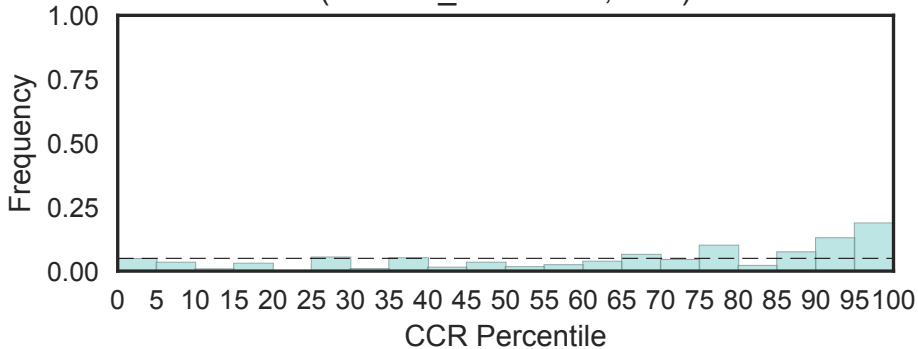

# Cell cycle exit and neuronal differentiation protein 1 (CEND1, N=1)

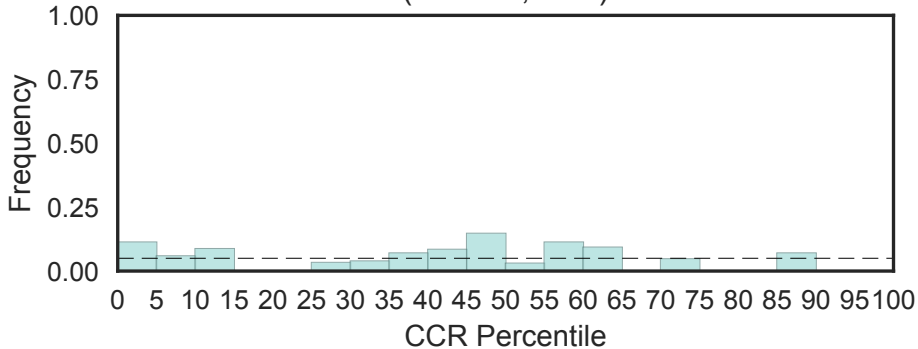

CENP-B N-terminal DNA-binding domain  
(CENP-B\_N, N=10)

Fisher's OR: 0.632; Bonferroni p-val: 1

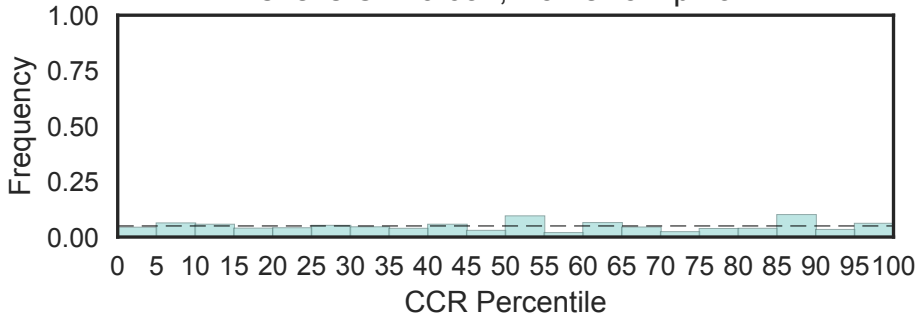

Centromere protein B dimerisation domain  
(CENP-B\_dimeris, N=1)

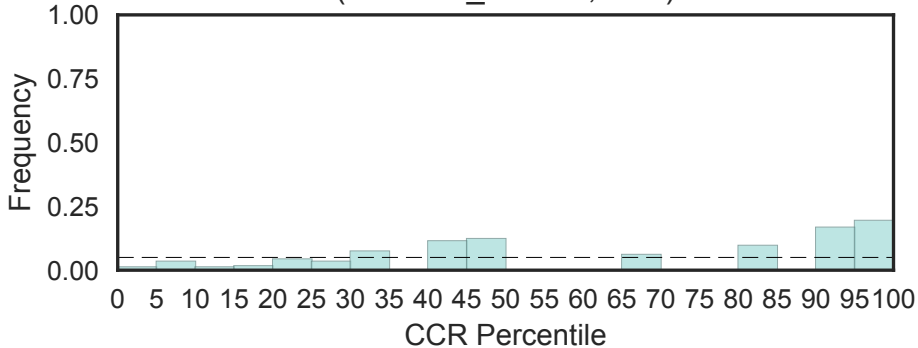

Mif2/CENP-C like  
(CENP-C\_C, N=1)

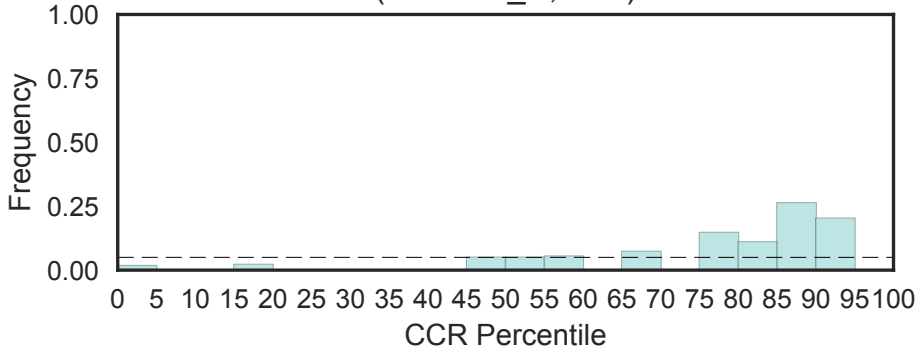

Centromere assembly component CENP-C middle DNMT3B-binding region  
(CENP-C\_mid, N=1)

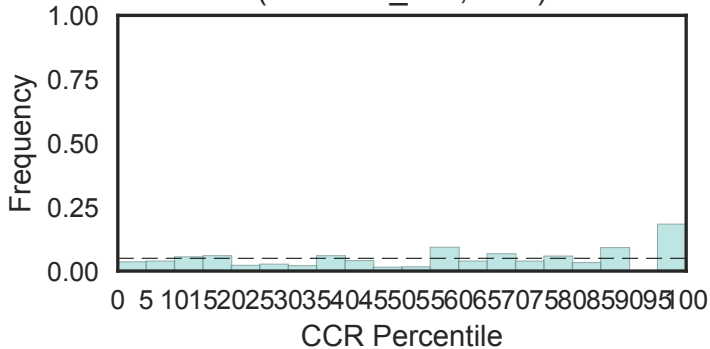

Rb-binding domain of kinetochore protein Cenp-F/LEK1  
(CENP-F\_C\_Rb\_bdg, N=1)

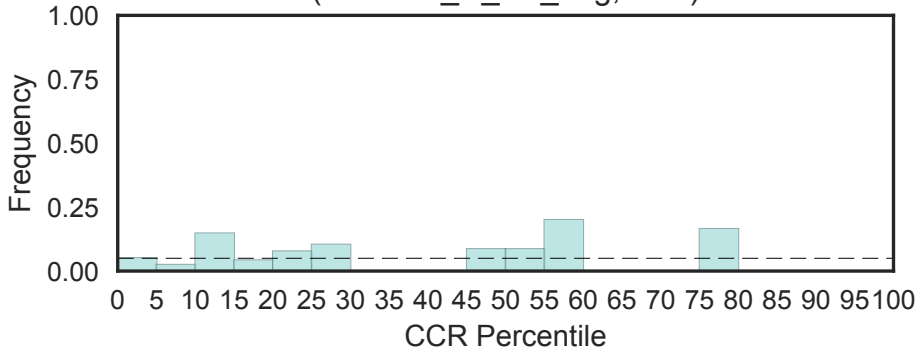



Cenp-F N-terminal domain  
(CENP-F\_N, N=1)

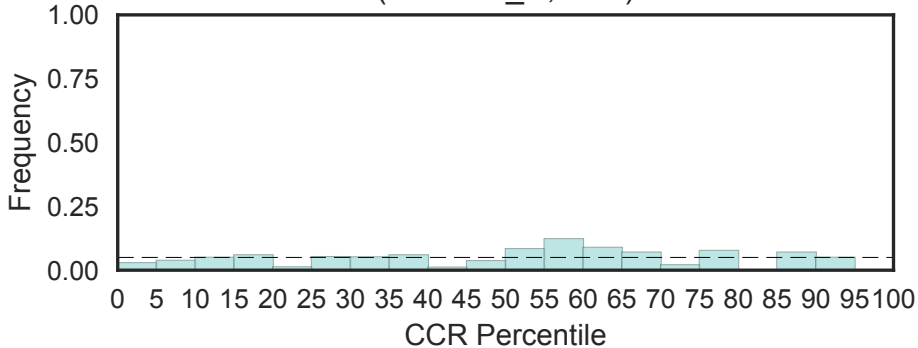

Leucine-rich repeats of kinetochore protein Cenp-F/LEK1  
(CENP-F\_leu\_zip, N=3)

Fisher's OR: 0; Bonferroni p-val: 1

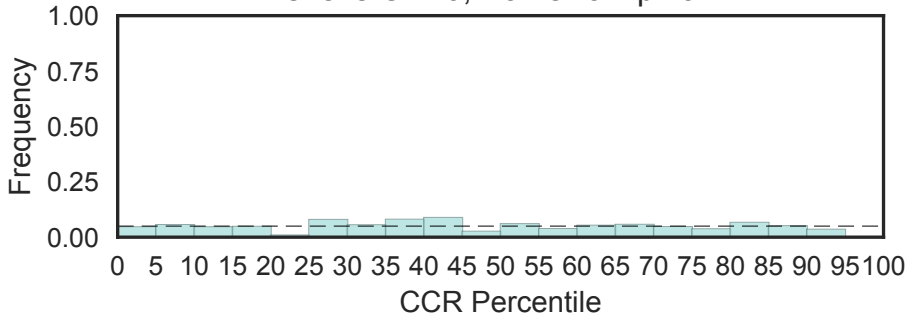

Centromere protein H (CENP-H)  
(CENP-H, N=1)

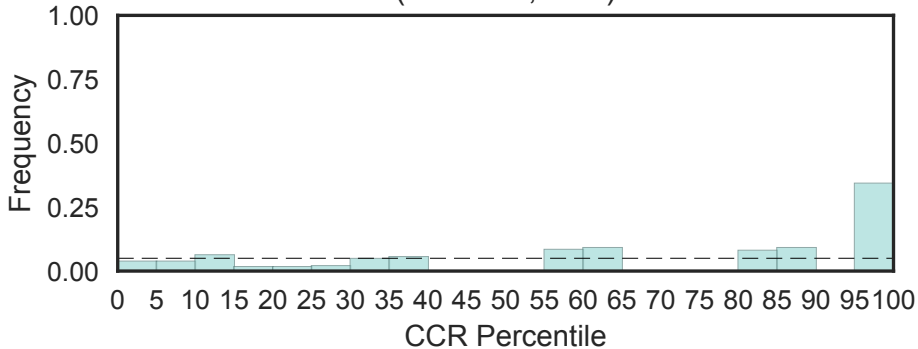

Centromere-associated protein K  
(CENP-K, N=1)

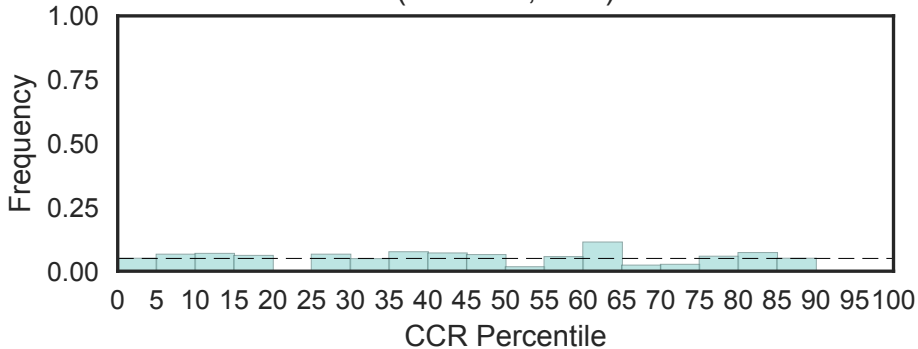

Kinetochores complex Sim4 subunit Fta1  
(CENP-L, N=1)

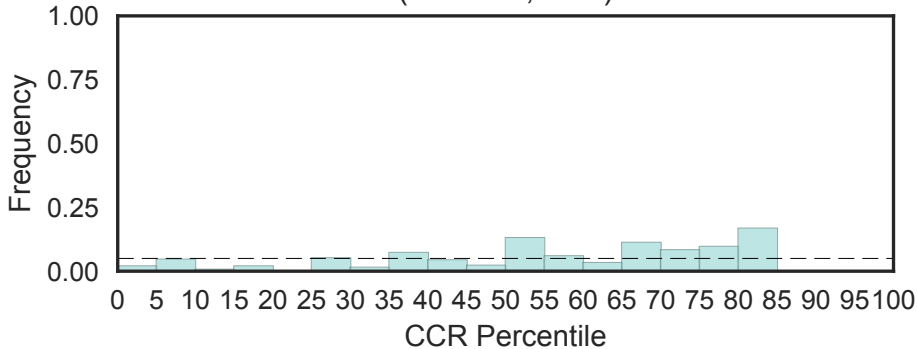

Centromere protein M (CENP-M)  
(CENP-M, N=1)

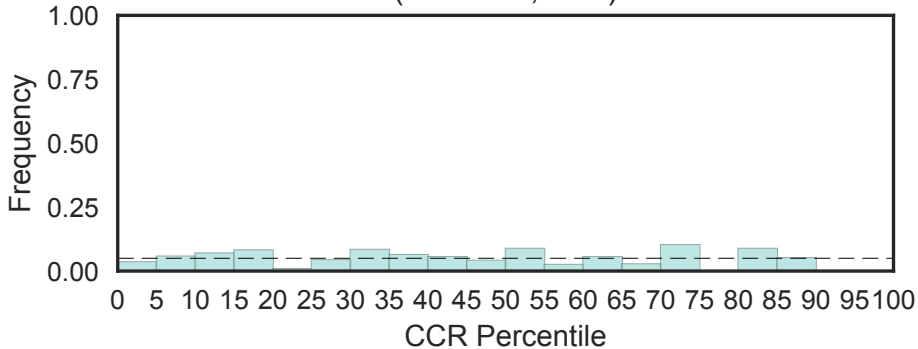

Kinetochores protein CHL4 like  
(CENP-N, N=2)

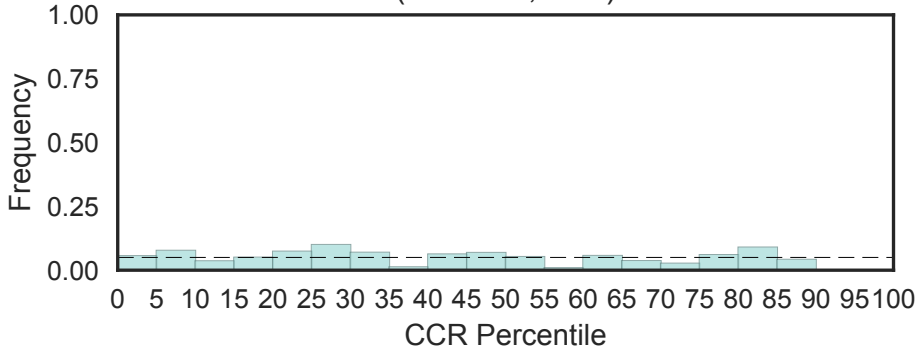

Cenp-O kinetochore centromere component  
(CENP-O, N=1)

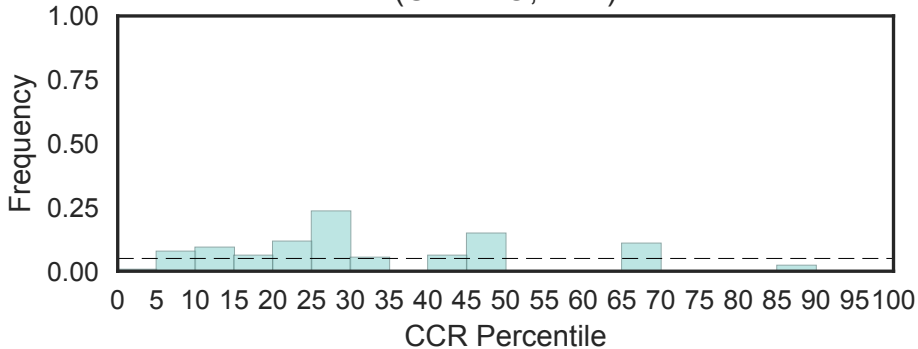



CENP-A-nucleosome distal (CAD) centromere subunit, CENP-P  
(CENP-P, N=5)

Fisher's OR: 0; Bonferroni p-val: 1

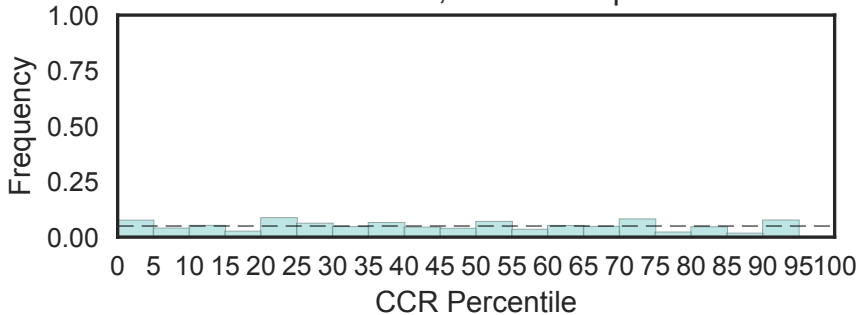

CENP-Q, a CENPA-CAD centromere complex subunit  
(CENP-Q, N=1)

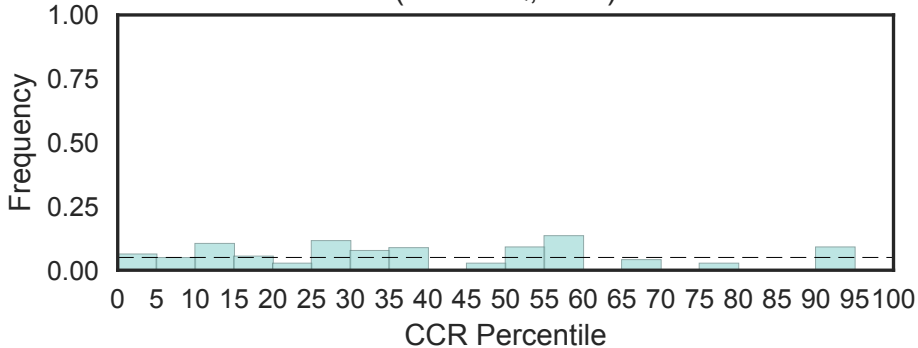

Kinetochores component, CENP-R  
(CENP-R, N=1)

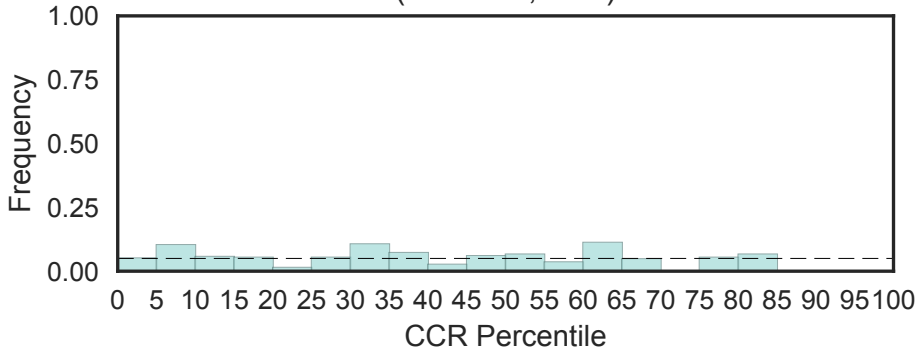

CENP-S protein  
(CENP-S, N=4)

Fisher's OR: 0; Bonferroni p-val: 1

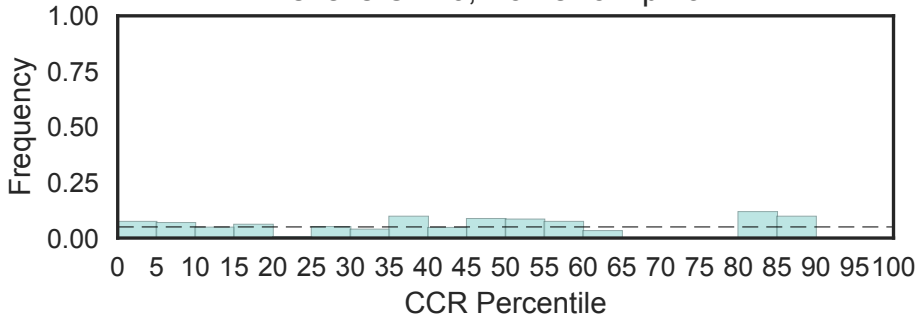

Centromere kinetochore component CENP-T histone fold  
(CENP-T\_C, N=18)

Fisher's OR: 0; Bonferroni p-val: 1

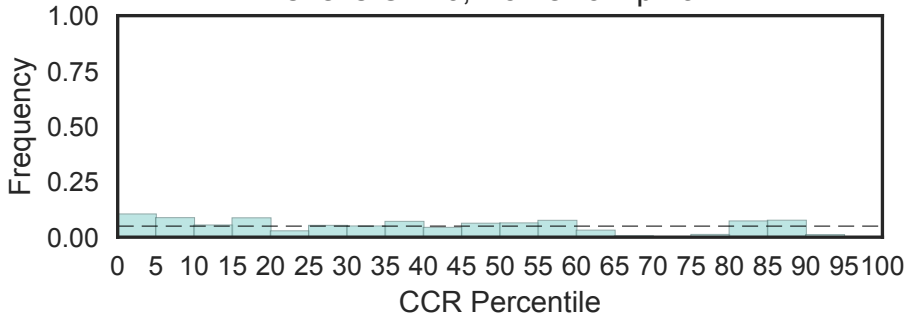

# CENP-A nucleosome associated complex (NAC) subunit (CENP-U, N=1)

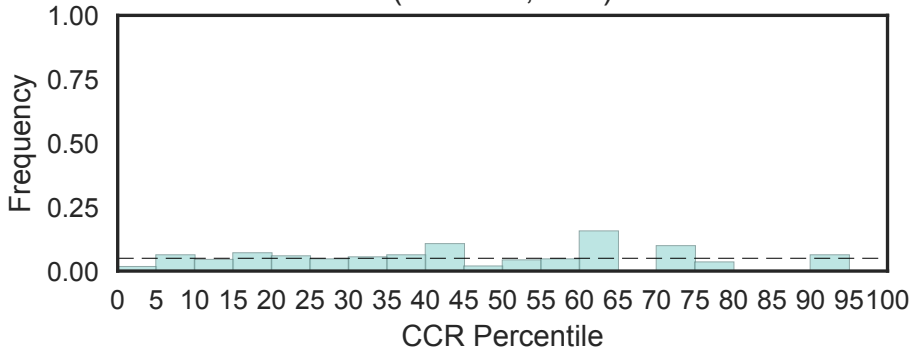

CENP-W protein  
(CENP-W, N=1)

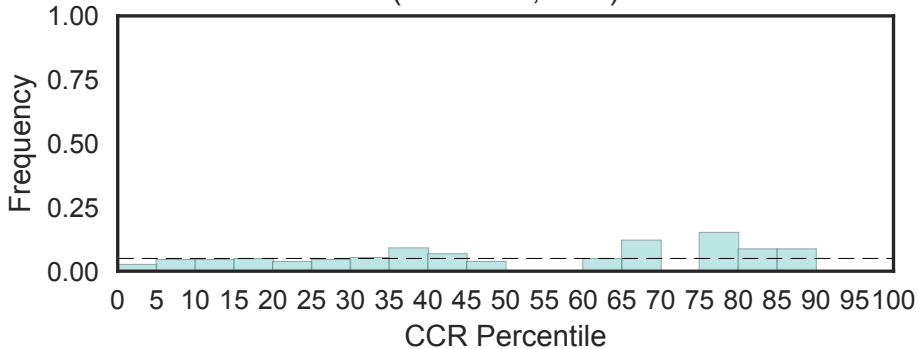

CENP-S associating Centromere protein X  
(CENP-X, N=1)

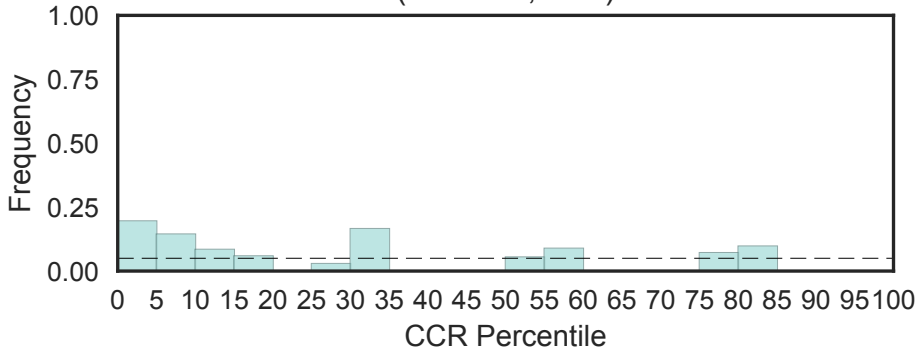



Kinetochores assembly subunit CENP-C N-terminal  
(CENP\_C\_N, N=1)

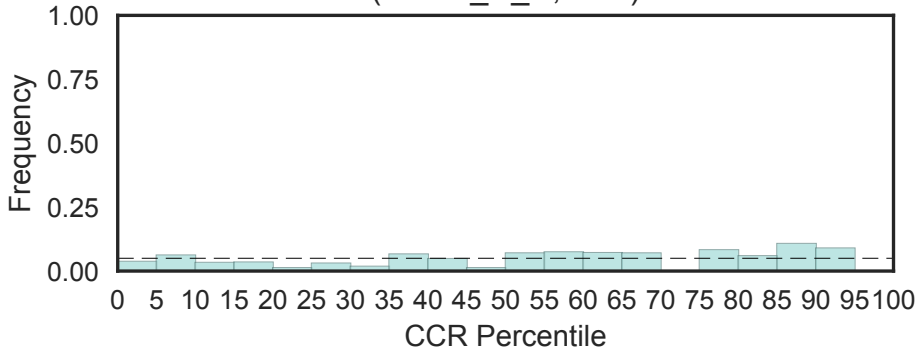

CEP170 C-terminus  
(CEP170\_C, N=3)

Fisher's OR: 1.31; Bonferroni p-val: 1

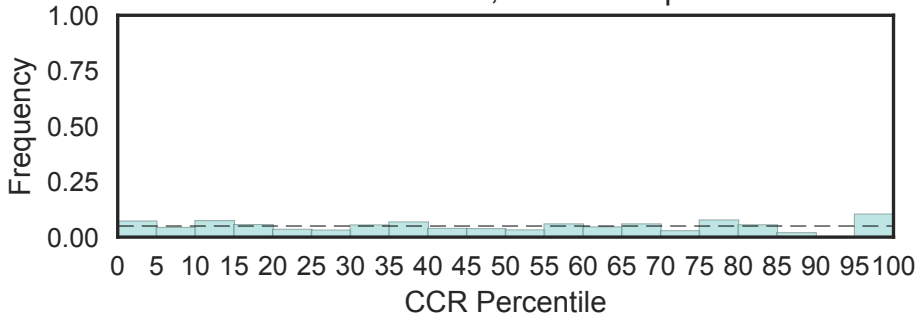

CEP19-like protein  
(CEP19, N=1)

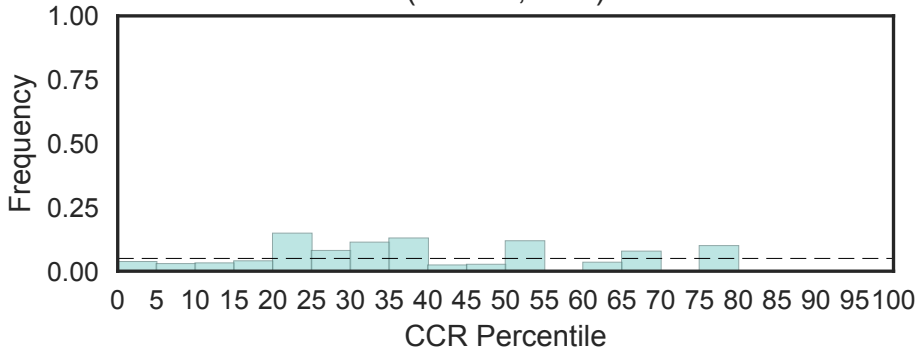

Coiled-coil region of centrosome protein CE290  
(CEP209\_CC5, N=1)

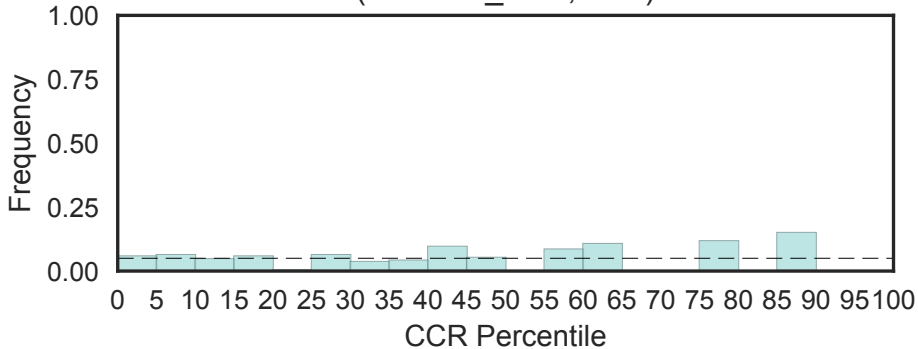

# Centrosomal spindle body, CEP44 (CEP44, N=1)

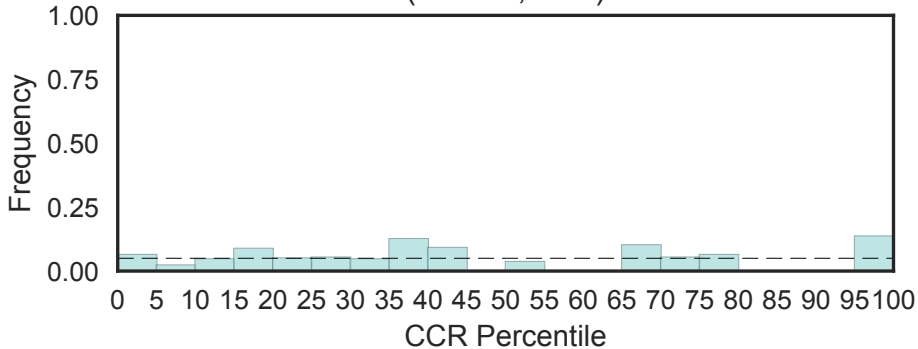

Centrosomal protein of 63 kDa  
(CEP63, N=2)

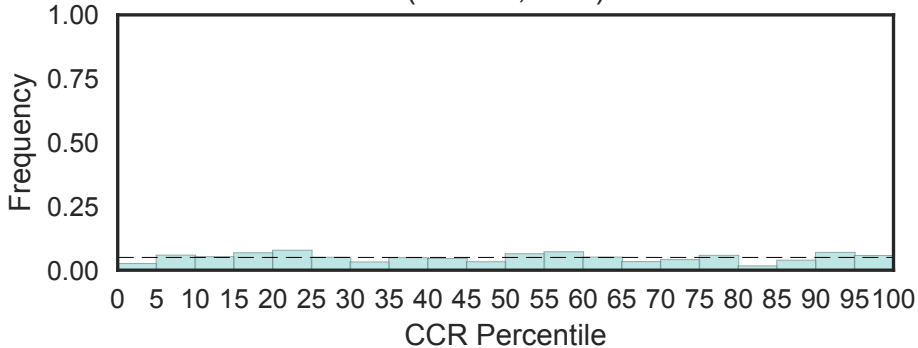

CEP76 C2 domain  
(CEP76-C2, N=1)

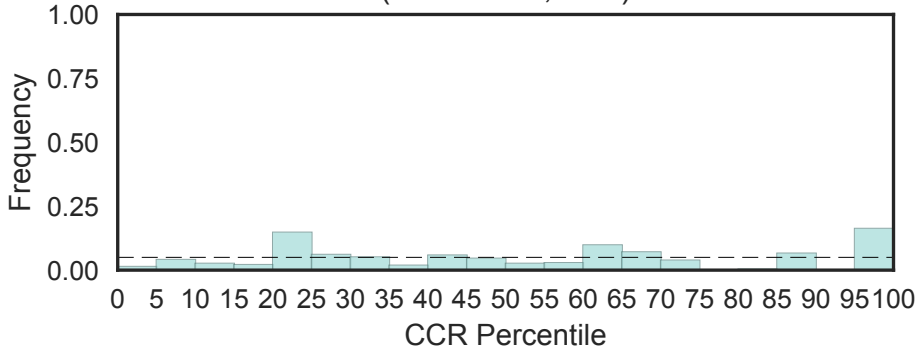

C6orf222, uncharacterised family  
(CF222, N=1)

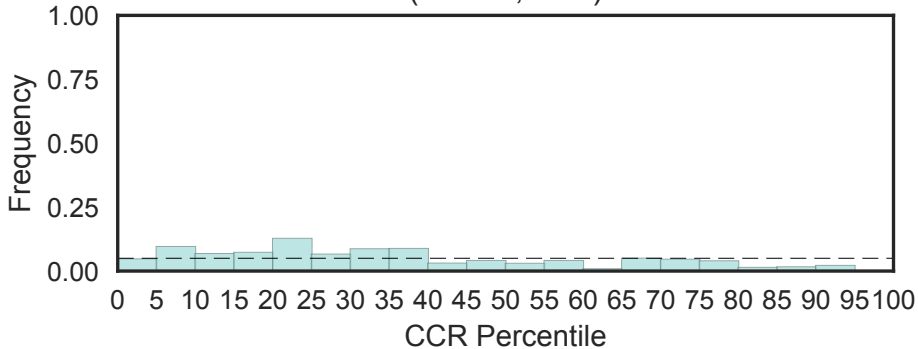



Cripto\_Frl-1\_Cryptic (CFC)  
(CFC, N=3)

Fisher's OR: 0; Bonferroni p-val: 1

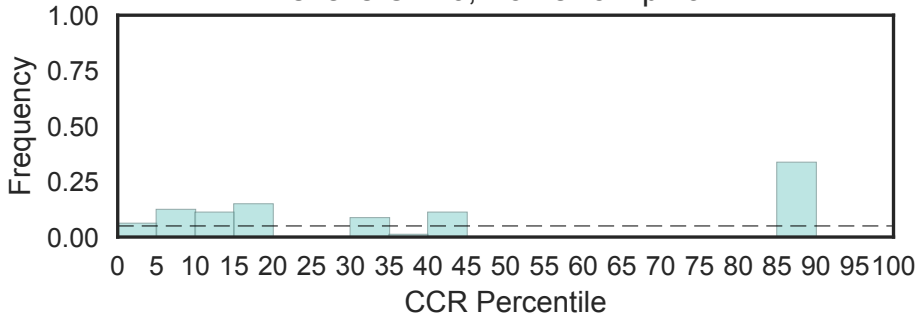

# Cystic fibrosis TM conductance regulator (CFTR), regulator domain (CFTR\_R, N=1)

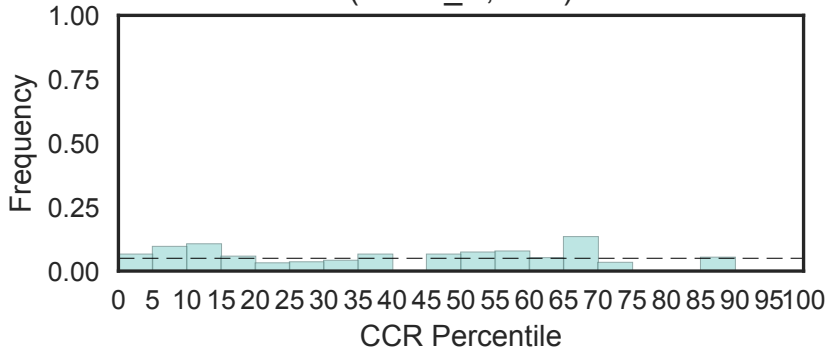

CG-1 domain  
(CG-1, N=2)

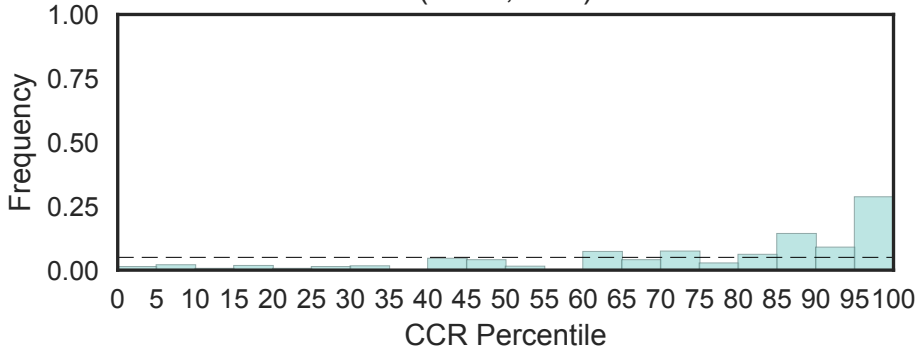

Kinase binding protein CGI-121  
(CGI-121, N=1)

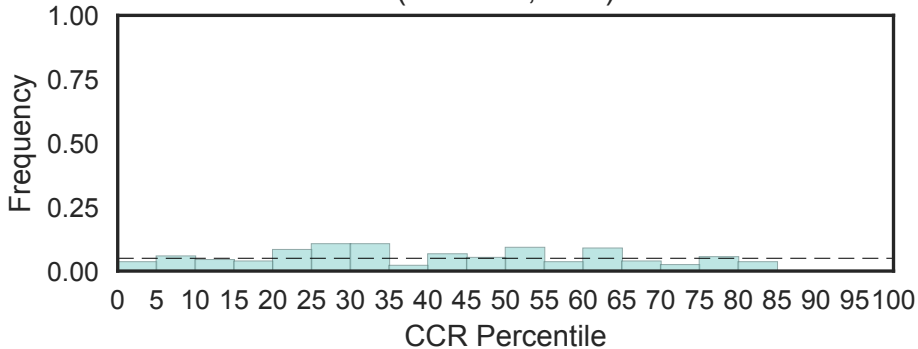

Calponin homology (CH) domain  
(CH, N=89)

Fisher's OR: 1.58; Bonferroni p-val: 1

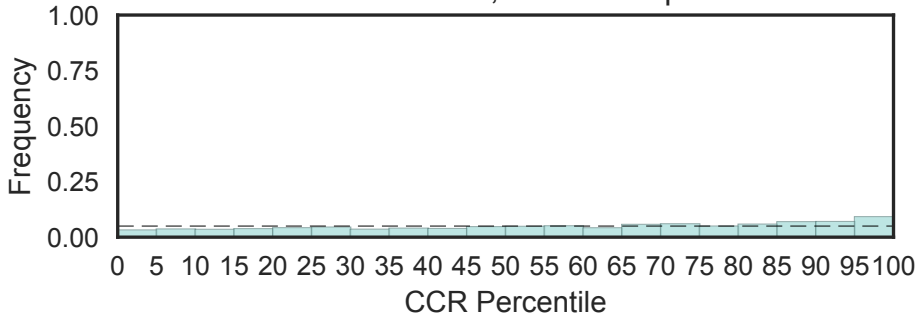

CHAT domain  
(CHAT, N=1)

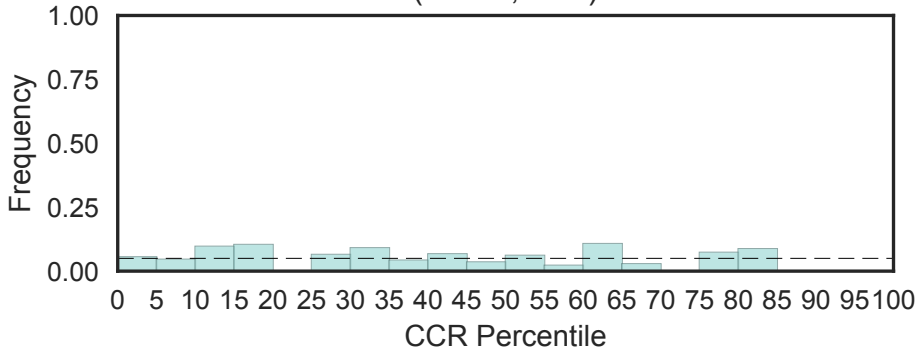

Chitobiase/beta-hexosaminidase C-terminal domain  
(CHB\_HEX\_C\_1, N=1)

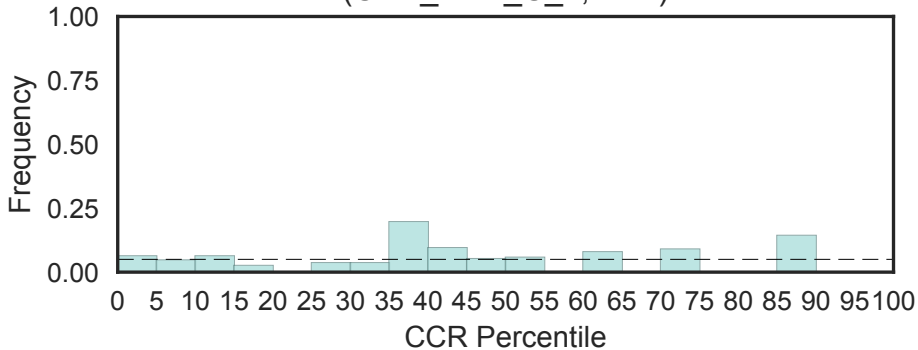

CHCH domain  
(CHCH, N=7)

Fisher's OR: 0; Bonferroni p-val: 1

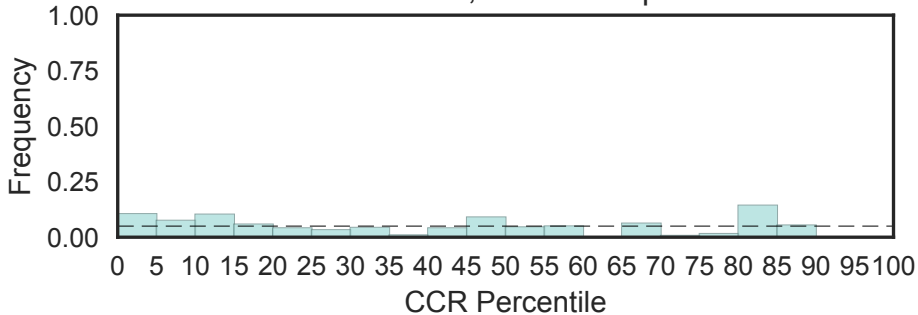



CHD5-like protein  
(CHD5, N=1)

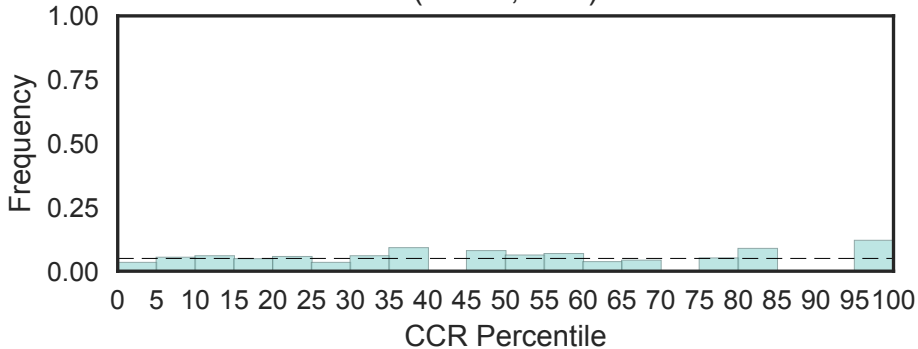

CHDCT2 (NUC038) domain  
(CHDCT2, N=3)

Fisher's OR: 7.07; Bonferroni p-val: 0.575

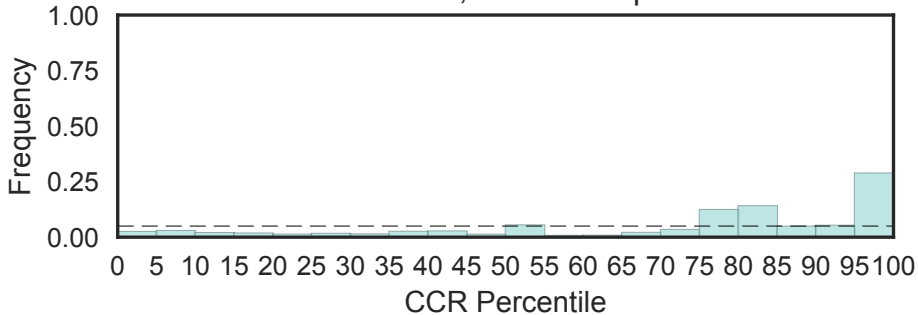

CHDNT (NUC034) domain  
(CHDNT, N=3)

Fisher's OR: 9.01; Bonferroni p-val: 1

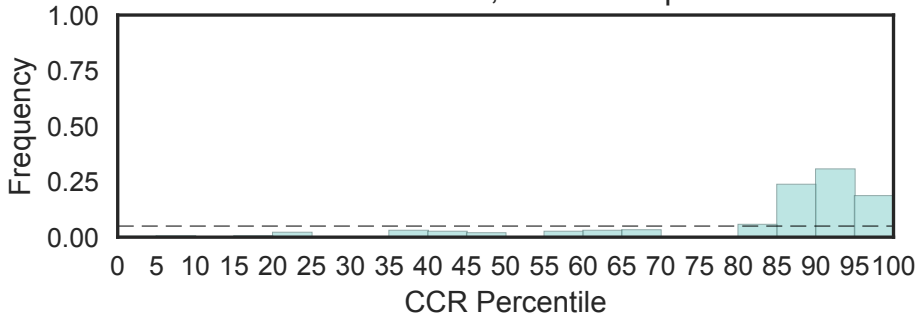

Chondroitin N-acetylgalactosaminyltransferase  
(CHGN, N=8)

Fisher's OR: 0.368; Bonferroni p-val: 1

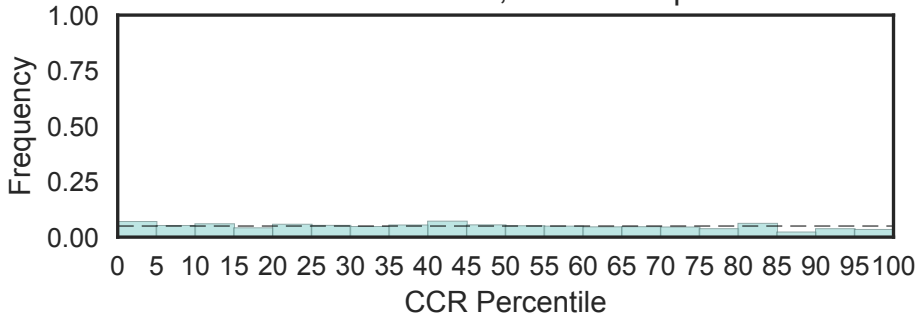

# CHORD (CHORD, N=2)

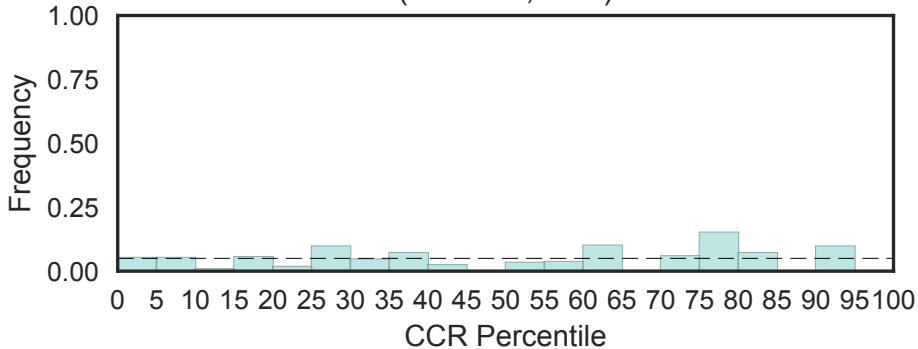

CHRD domain  
(CHRD, N=2)

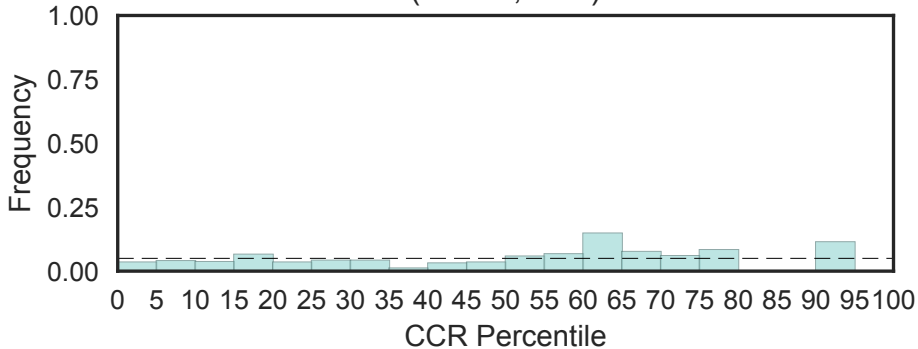

# Histone chaperone domain CHZ (CHZ, N=1)

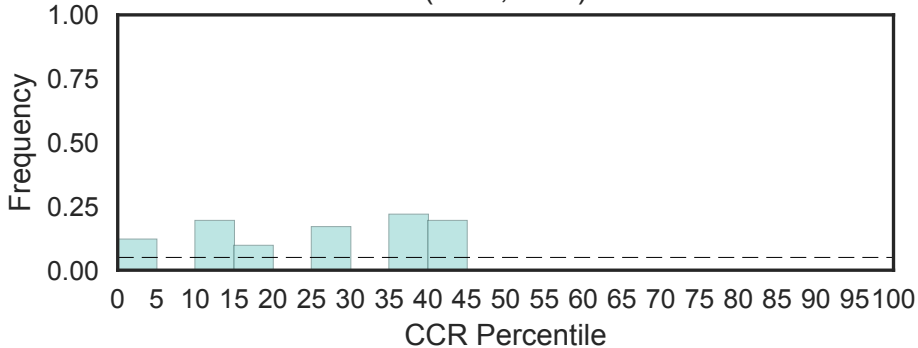

CH-like domain in sperm protein  
(CH\_2, N=3)

Fisher's OR: 0; Bonferroni p-val: 1

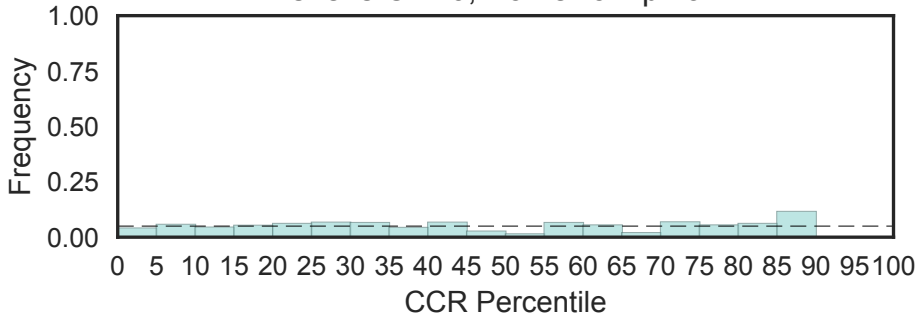



NADH:ubiquinone oxidoreductase subunit B14.5a (Complex I-B14.5a)  
(CI-B14\_5a, N=1)

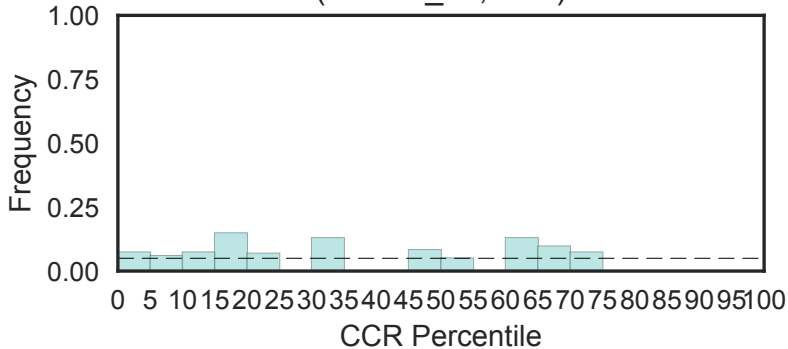

Complex I intermediate-associated protein 30 (CIA30)  
(CIA30, N=1)

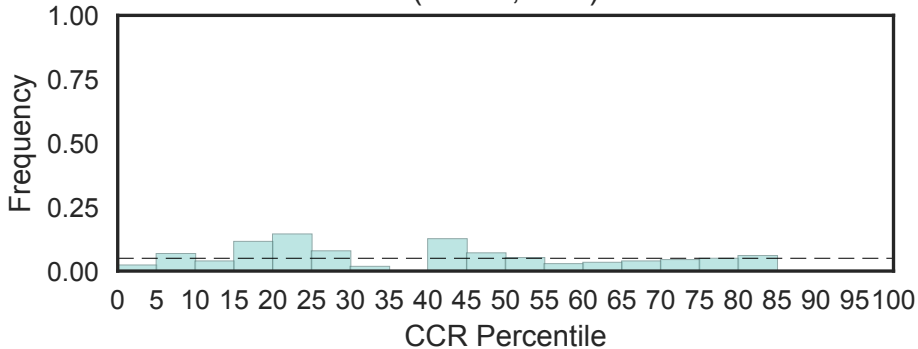

# Cytokine-induced anti-apoptosis inhibitor 1, Fe-S biogenesis (CIAPIN1, N=2)

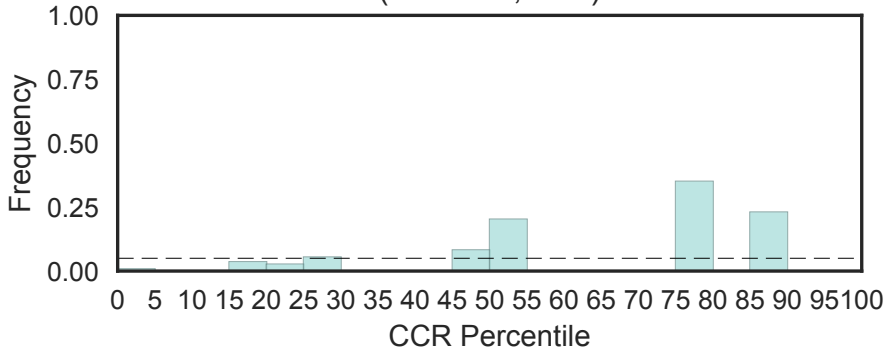

CIDE-N domain  
(CIDE-N, N=6)

Fisher's OR: 0; Bonferroni p-val: 1

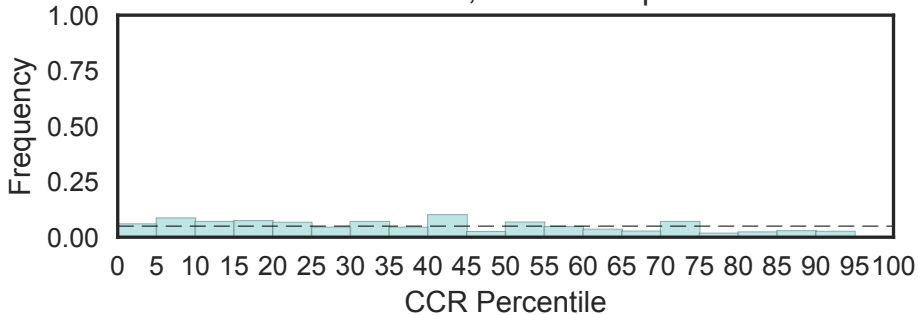

Binding region of GANP to ENY2  
(CID\_GANP, N=1)

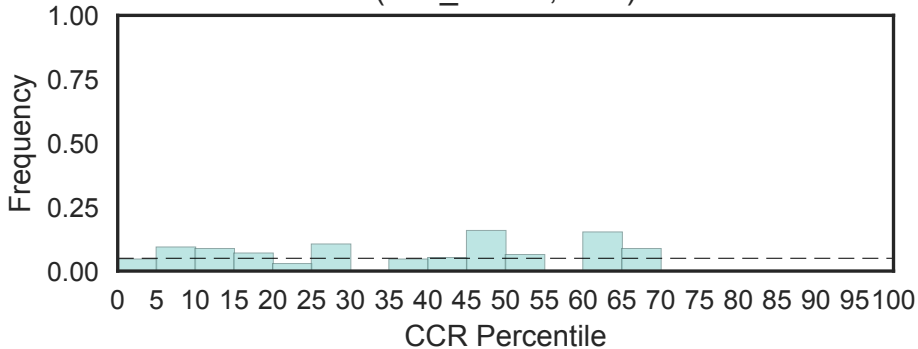

# Cation-independent mannose-6-phosphate receptor repeat (CIMR, N=15)

Fisher's OR: 0.428; Bonferroni p-val: 1

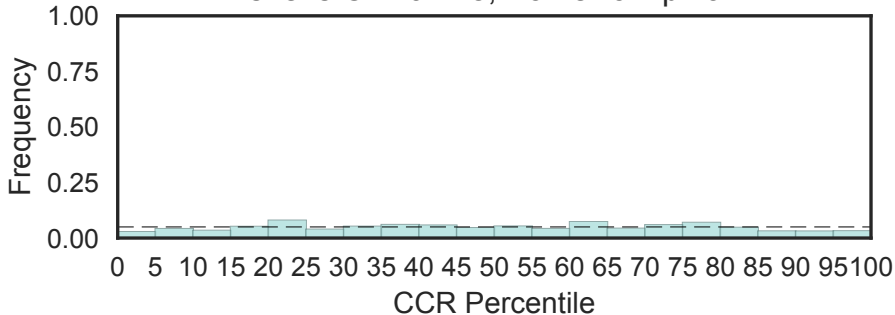

CITED  
(CITED, N=2)

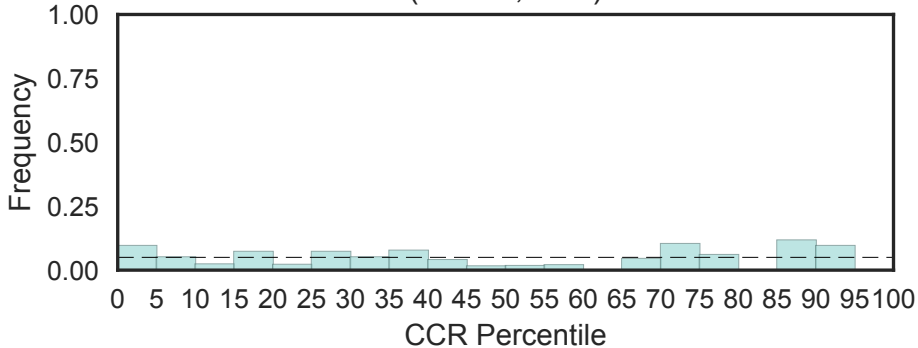

Casein kinase 1 gamma C terminal  
(CK1gamma\_C, N=4)

Fisher's OR: 0; Bonferroni p-val: 1

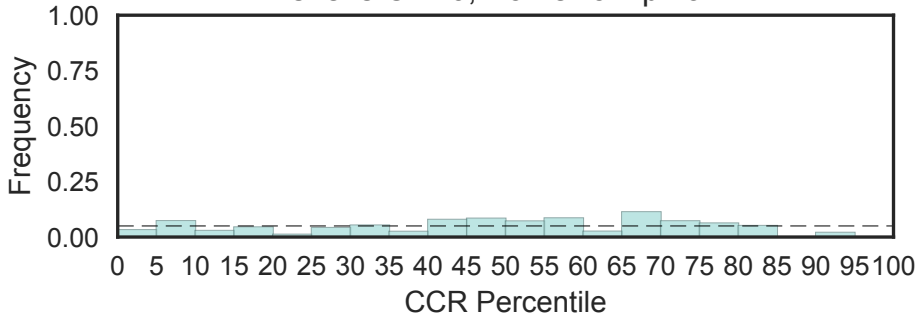



Casein Kinase 2 substrate  
(CK2S, N=1)

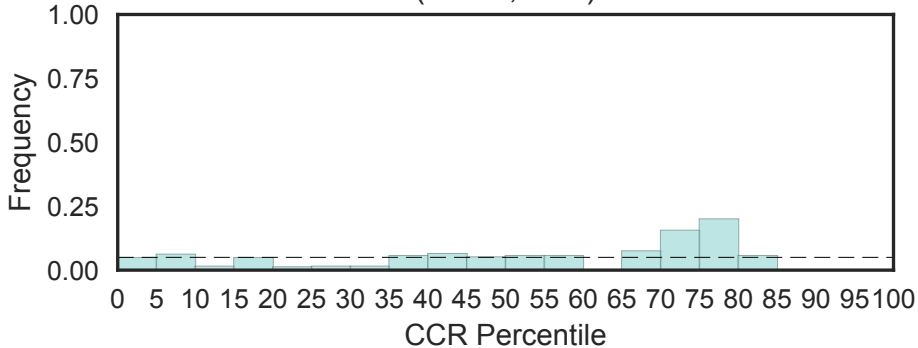

Cytoskeleton-associated protein 2 C-terminus  
(CKAP2\_C, N=4)

Fisher's OR: 0; Bonferroni p-val: 1

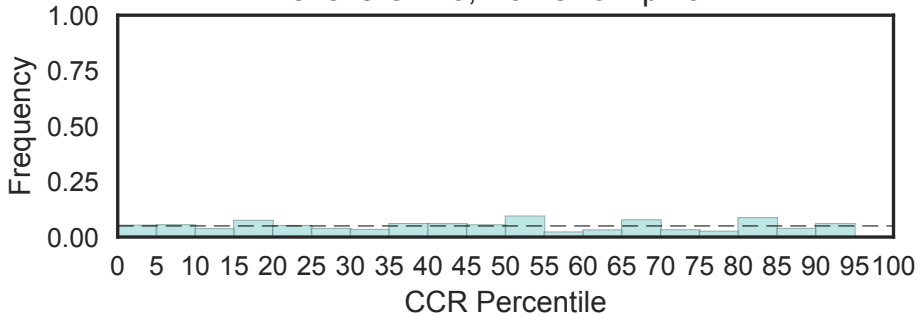

# Cyclin-dependent kinase regulatory subunit (CKS, N=2)

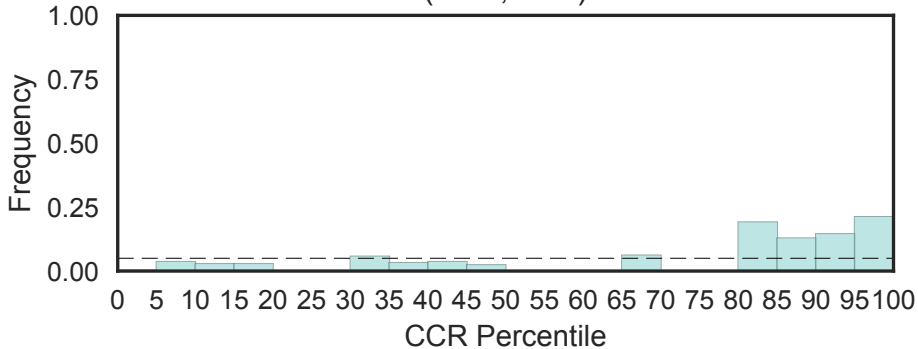

Flagellar C1a complex subunit C1a-32  
(CLAMP, N=4)

Fisher's OR: 0; Bonferroni p-val: 1

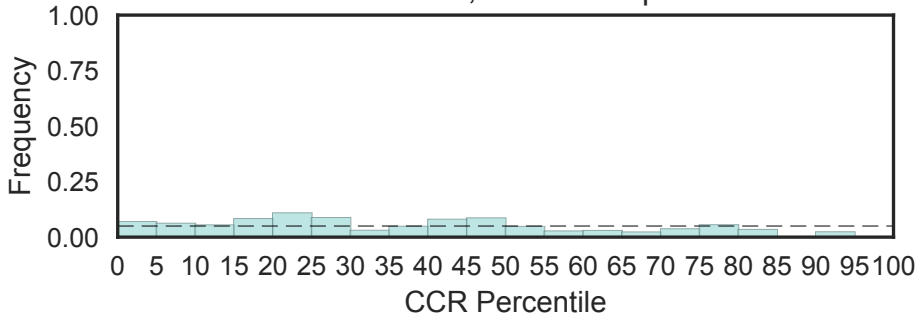

CLASP N terminal  
(CLASP\_N, N=9)

Fisher's OR: 2.97; Bonferroni p-val: 1

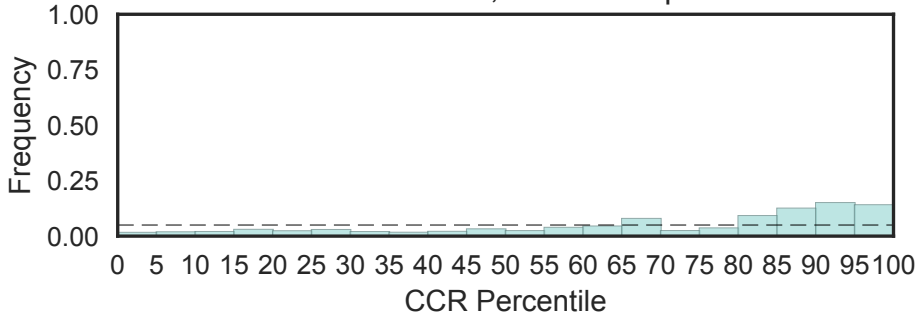

Calcium-activated chloride channel N terminal  
(CLCA, N=3)

Fisher's OR: 0.328; Bonferroni p-val: 1

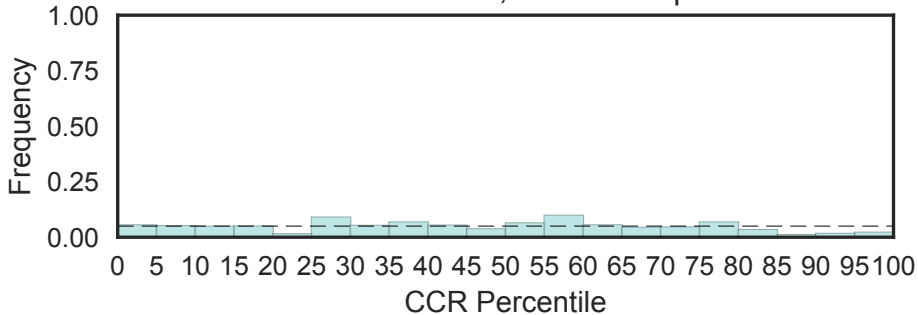

CLIP1 zinc knuckle  
(CLIP1\_ZNF, N=2)

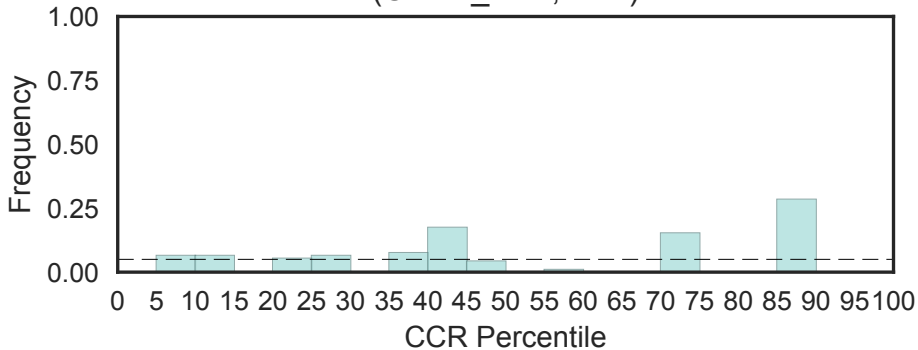

CLLAC-motif containing domain  
(CLLAC, N=1)

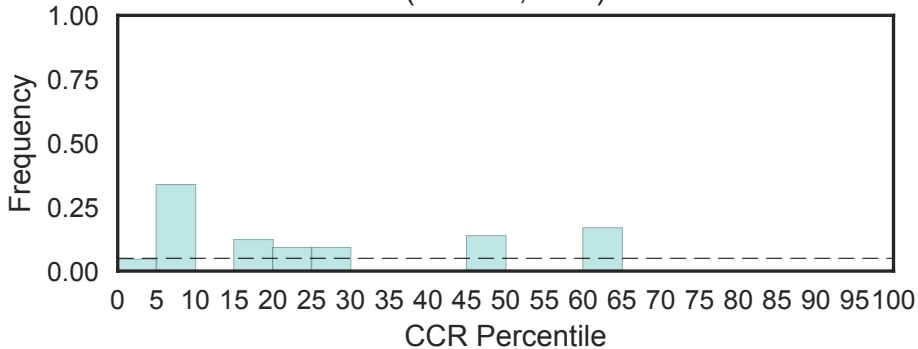



CLN3 protein  
(CLN3, N=1)

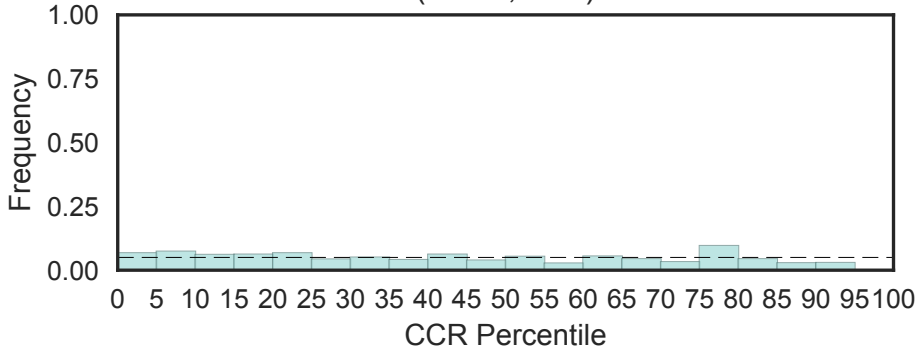

Ceroid-lipofuscinosis neuronal protein 5  
(CLN5, N=1)

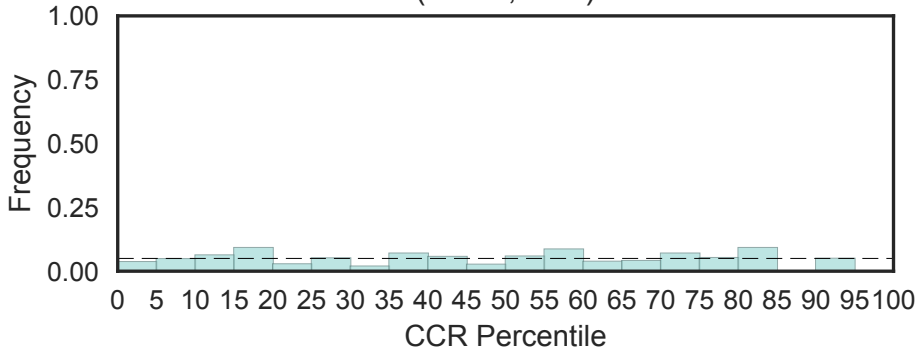

Ceroid-lipofuscinosis neuronal protein 6  
(CLN6, N=1)

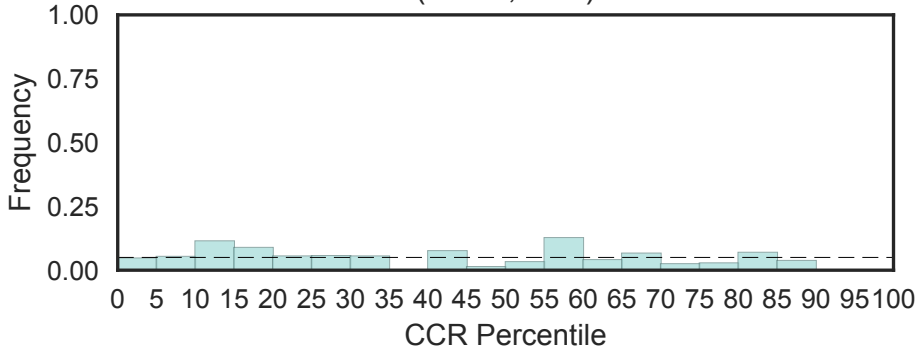

# N-terminal beta-sandwich domain of polyadenylation factor (CLP1\_N, N=1)

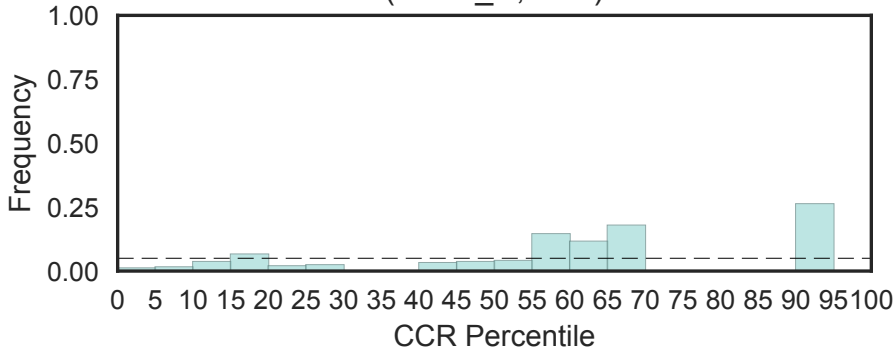

# mRNA cleavage and polyadenylation factor CLP1 P-loop (CLP1\_P, N=2)

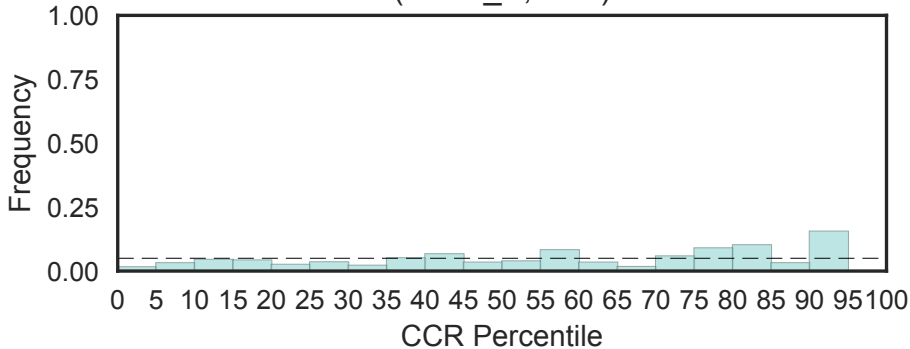

Cleft lip and palate transmembrane protein 1 (CLPTM1)  
(CLPTM1, N=3)

Fisher's OR: 0.693; Bonferroni p-val: 1

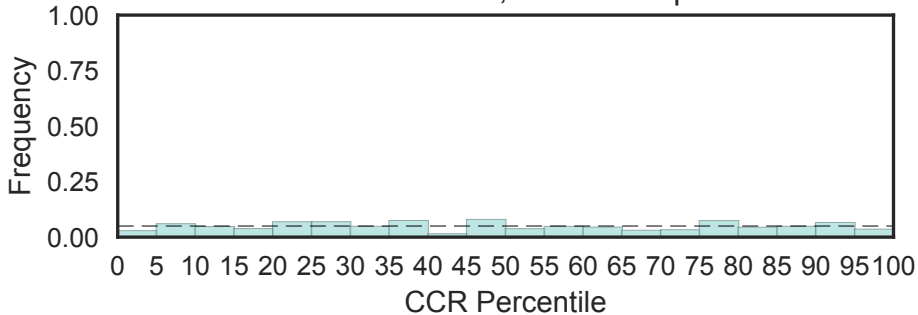

Clp protease  
(CLP\_protease, N=1)

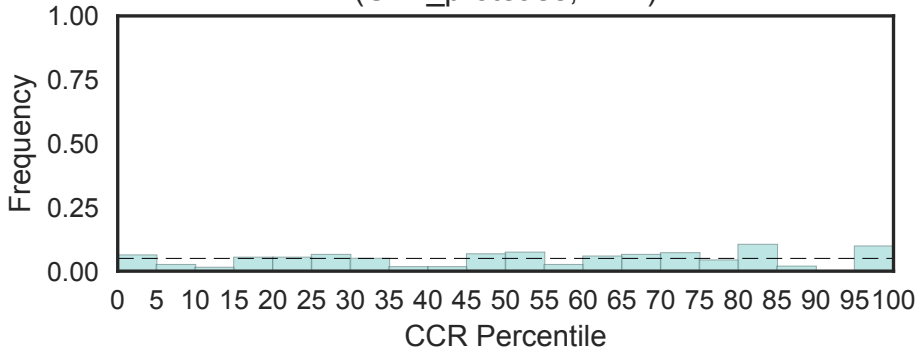

CTLH/CRA C-terminal to LisH motif domain  
(CLTH, N=6)

Fisher's OR: 1.04; Bonferroni p-val: 1

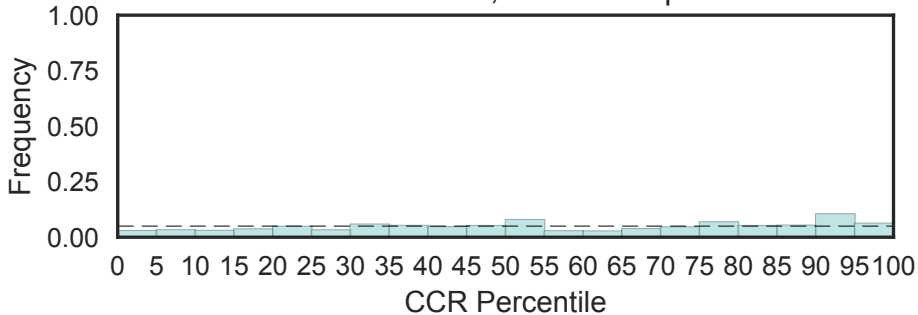



# Clustered mitochondria (CLU, N=1)

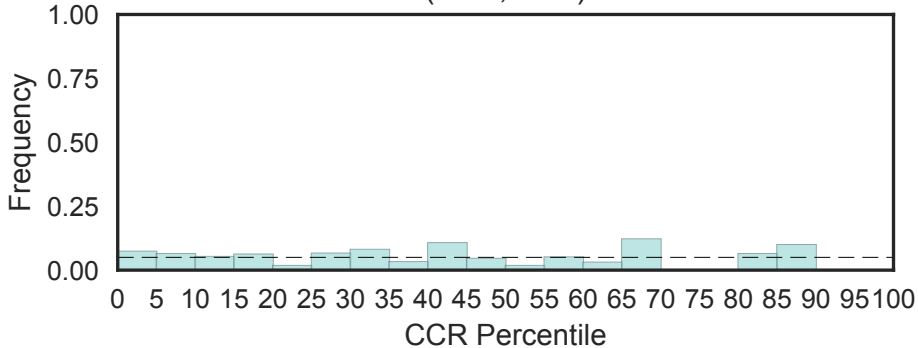

Mitochondrial function, CLU-N-term  
(CLU\_N, N=1)

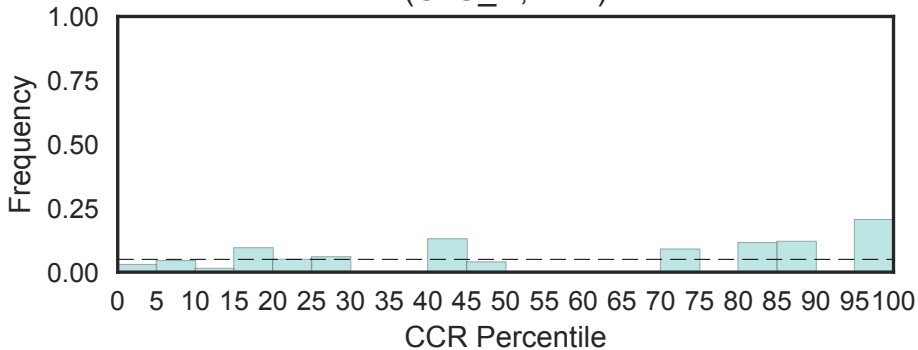

C-terminal leucine zipper domain of cyclic nucleotide-gated channels  
(CLZ, N=5)

Fisher's OR: 0.851; Bonferroni p-val: 1

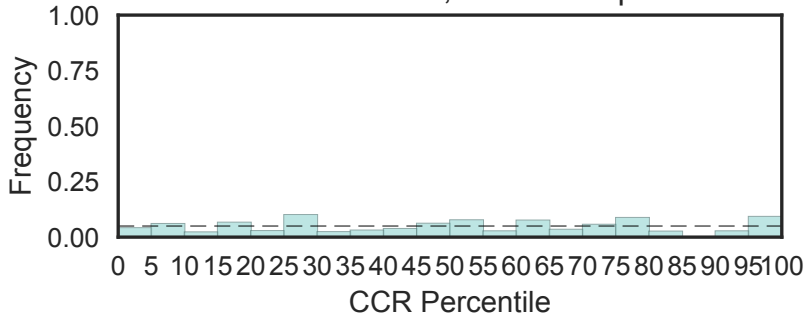

# Mycolic acid cyclopropane synthetase (CMAS, N=1)

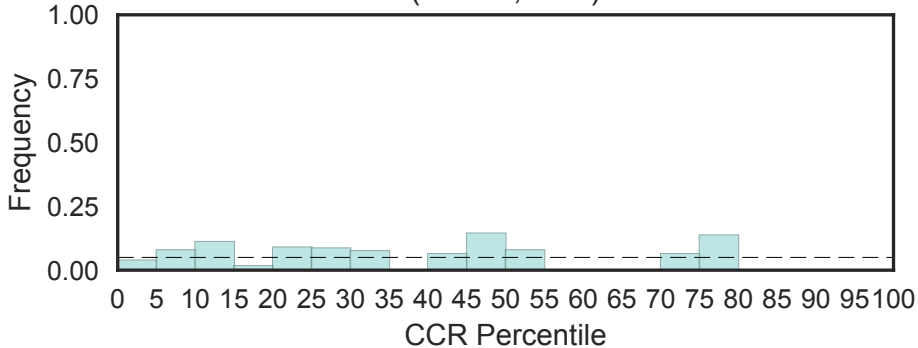

U3-containing 90S pre-ribosomal complex subunit  
(CMS1, N=1)

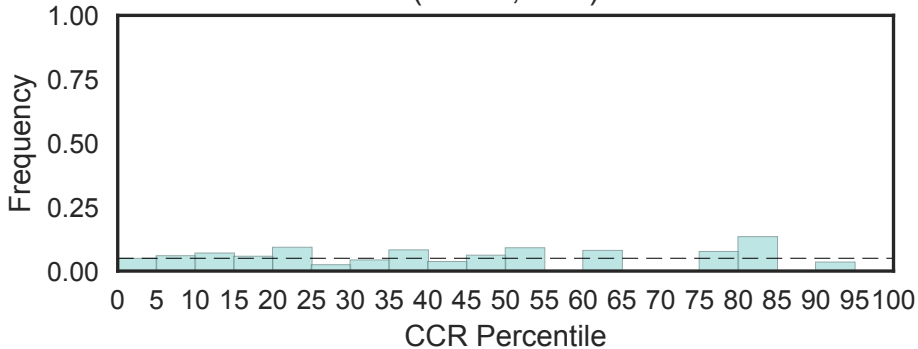

Condensin II complex subunit CAP-H2 or CNDH2, C-term  
(CNDH2\_C, N=1)

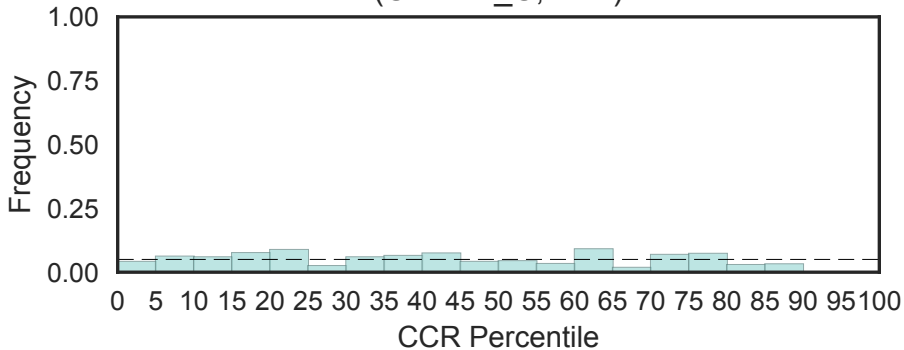

PF16858  
(CNDH2\_M, N=1)

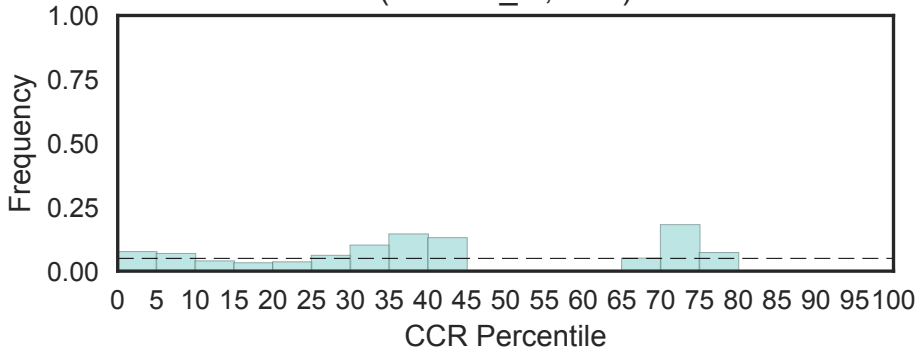

Condensin II complex subunit CAP-H2 or CNDH2, N-terminal  
(CNDH2\_N, N=1)

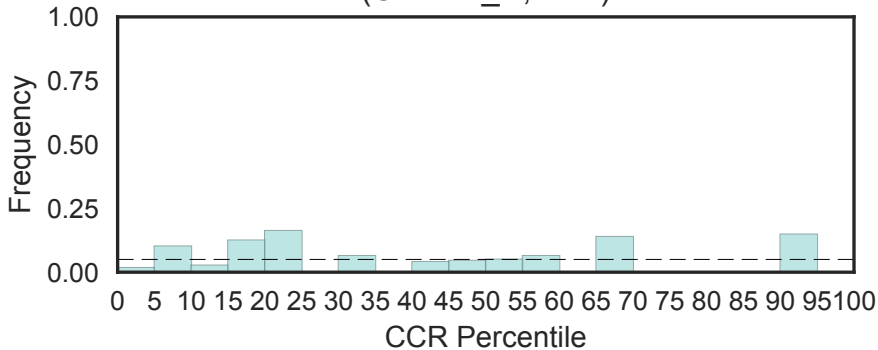



CNH domain  
(CNH, N=15)

Fisher's OR: 2.3; Bonferroni p-val: 1

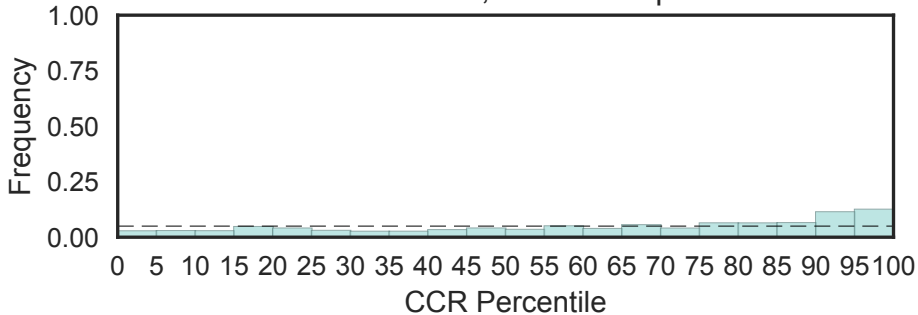

CCR4-NOT transcription complex subunit 1 CAF1-binding domain  
(CNOT1\_CAF1\_bind, N=1)

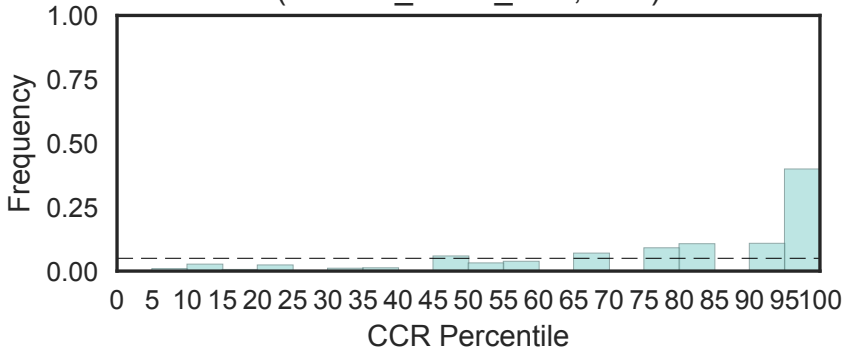

CCR4-NOT transcription complex subunit 1 HEAT repeat  
(CNOT1\_HEAT, N=1)

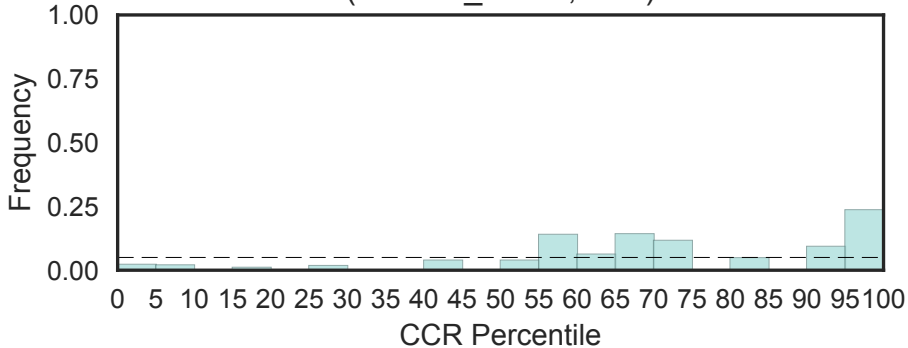

CCR4-NOT transcription complex subunit 1 TTP binding domain  
(CNOT1\_TTP\_bind, N=1)

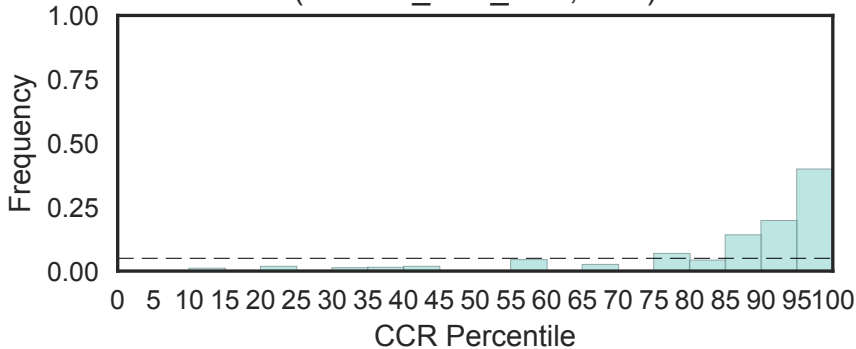

2',3'-cyclic nucleotide 3'-phosphodiesterase (CNP or CNPase)  
(CNPase, N=1)

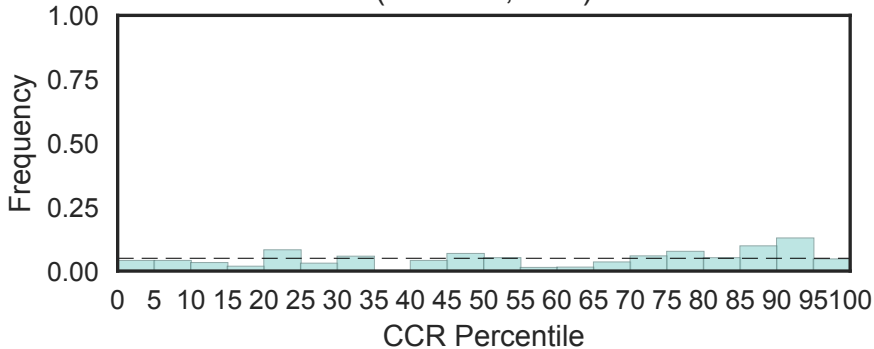

# CB1 cannabinoid receptor-interacting protein 1 (CNRIP1, N=1)

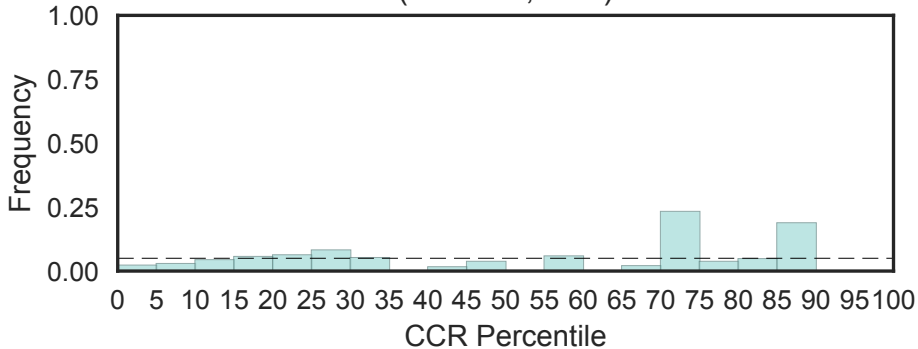

# Ciliary neurotrophic factor (CNTF, N=2)

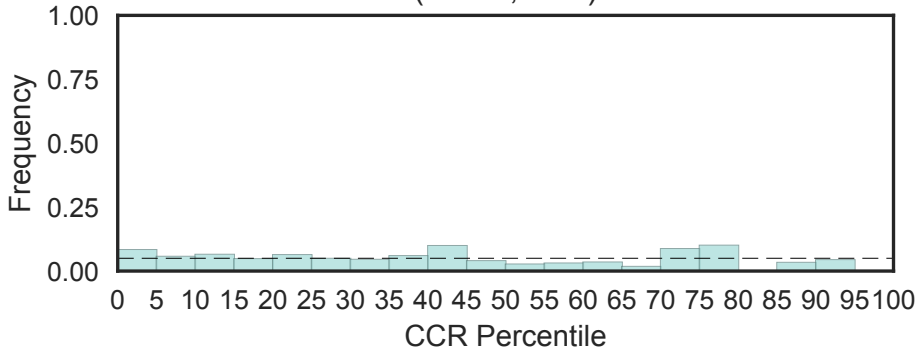

Carbon-nitrogen hydrolase  
(CN\_hydrolase, N=8)

Fisher's OR: 0.328; Bonferroni p-val: 1

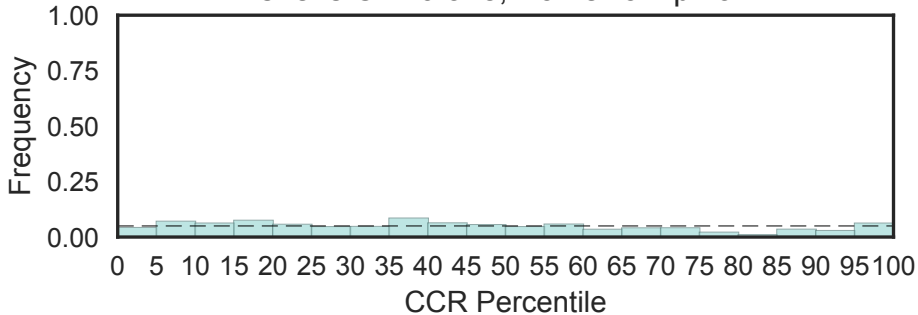



Cofactor of BRCA1 (COBRA1)  
(COBRA1, N=1)

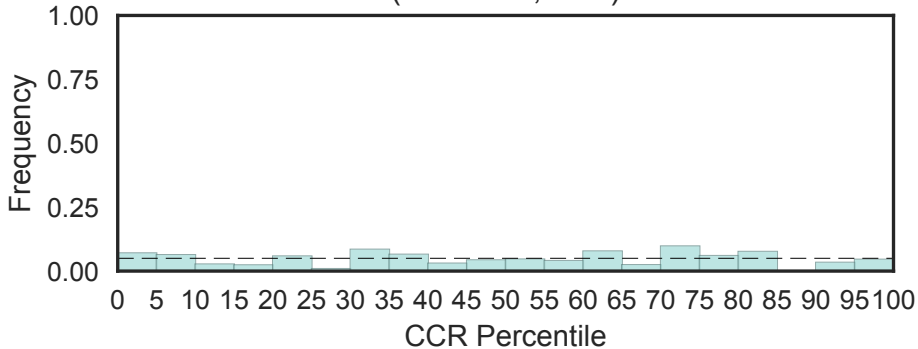

Transcription factor COE1 DNA-binding domain  
(COE1\_DBD, N=4)

Fisher's OR: 3.78; Bonferroni p-val: 1

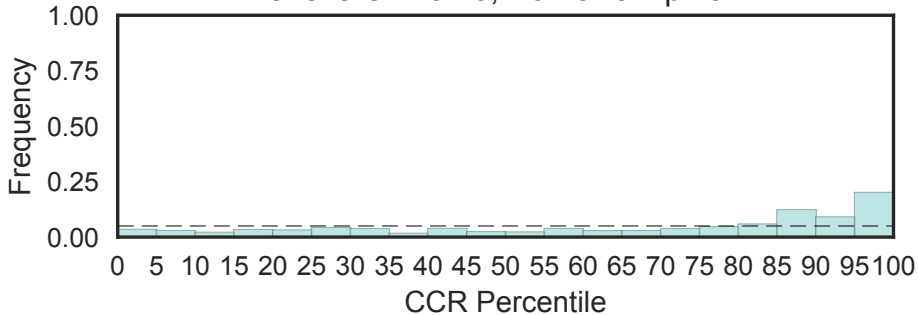

Transcription factor COE1 helix-loop-helix domain  
(COE1\_HLH, N=4)

Fisher's OR: 2.77; Bonferroni p-val: 1

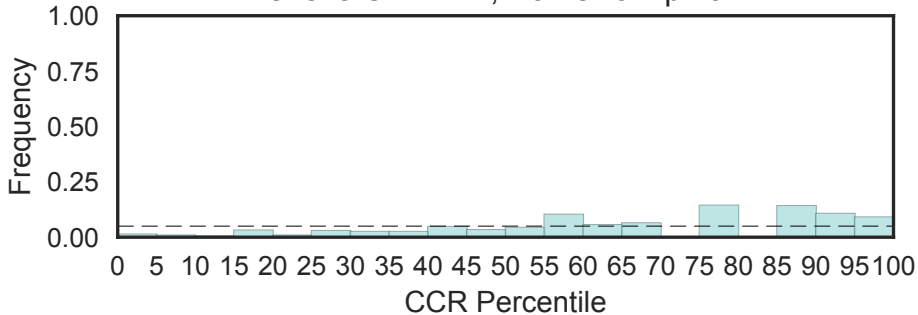

# COG (conserved oligomeric Golgi) complex component, COG2 (COG2, N=2)

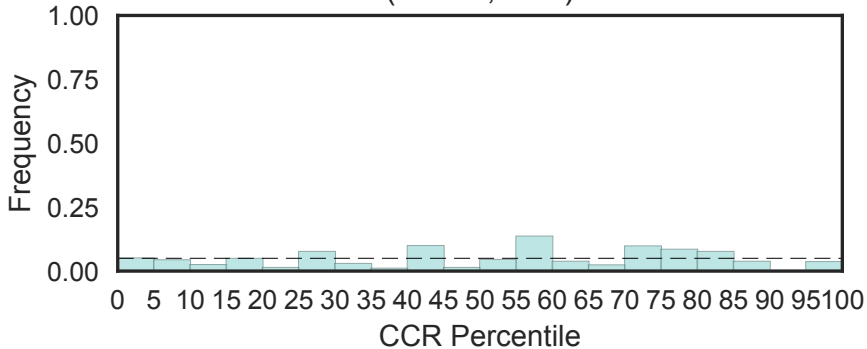

# COG4 transport protein (COG4, N=1)

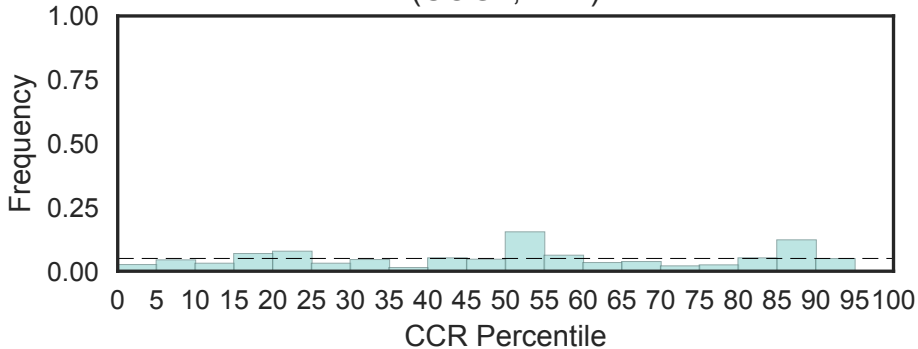

Golgi transport complex subunit 5  
(COG5, N=1)

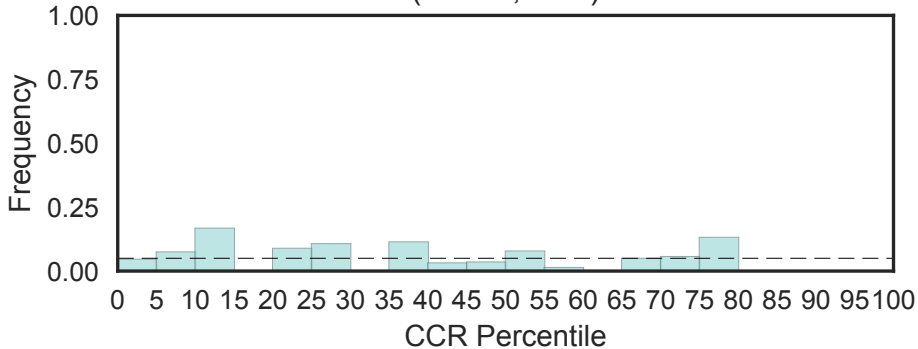

Conserved oligomeric complex COG6  
(COG6, N=1)

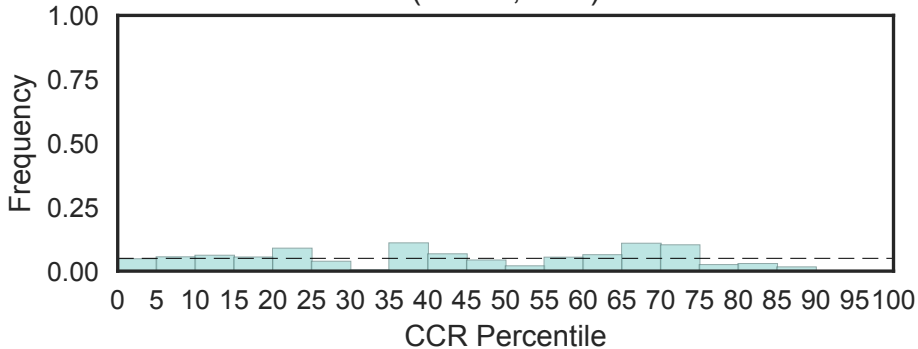

# Golgi complex component 7 (COG7) (COG7, N=1)

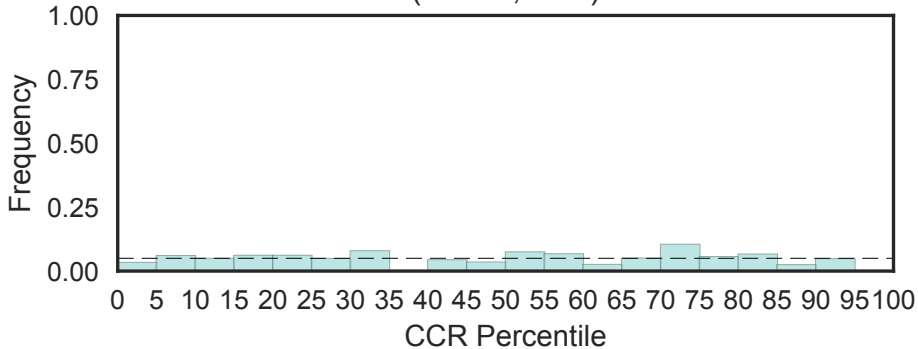



Fibrillar collagen C-terminal domain  
(COLFI, N=14)

Fisher's OR: 0.285; Bonferroni p-val: 1

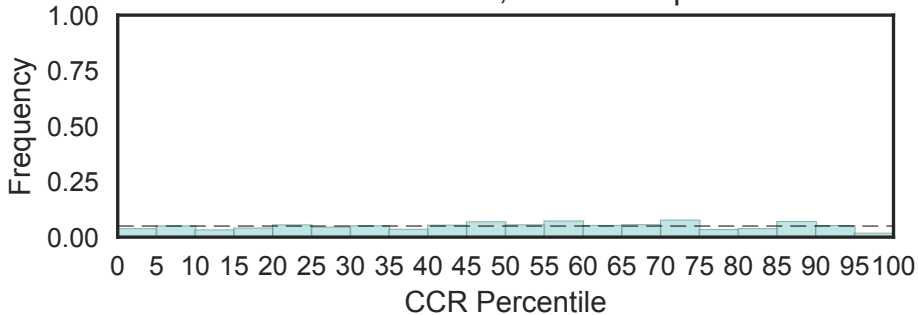

COMMD1 N-terminal domain  
(COMMD1\_N, N=1)

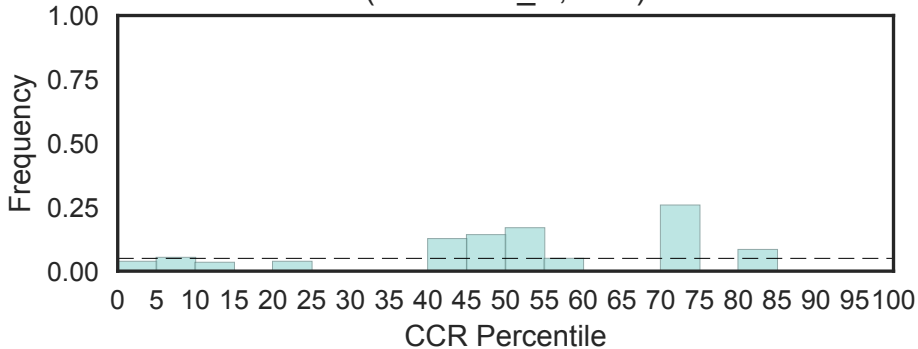

COMM domain  
(COMM\_domain, N=11)  
Fisher's OR: 0; Bonferroni p-val: 1

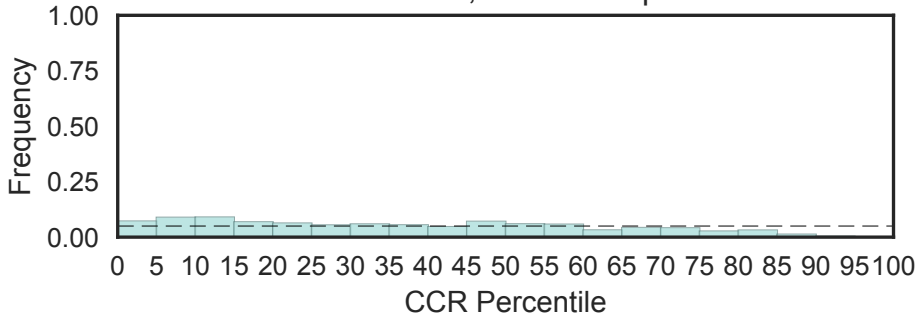

Cartilage oligomeric matrix protein  
(COMP, N=3)

Fisher's OR: 2.46; Bonferroni p-val: 1

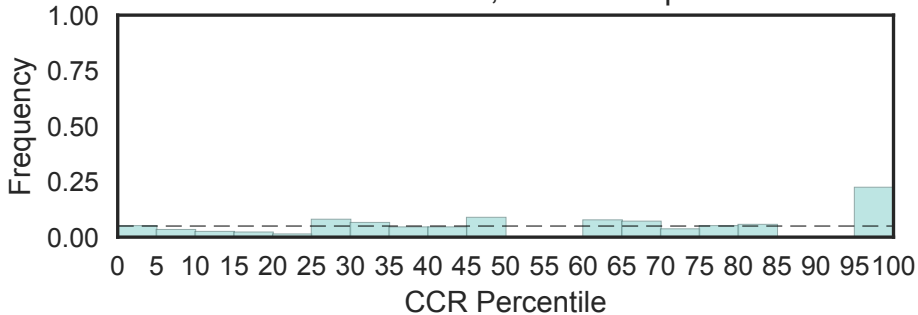

COMPASS (Complex proteins associated with Set1p) component shg1  
(COMPASS-Shg1, N=3)

Fisher's OR: 6.59; Bonferroni p-val: 1

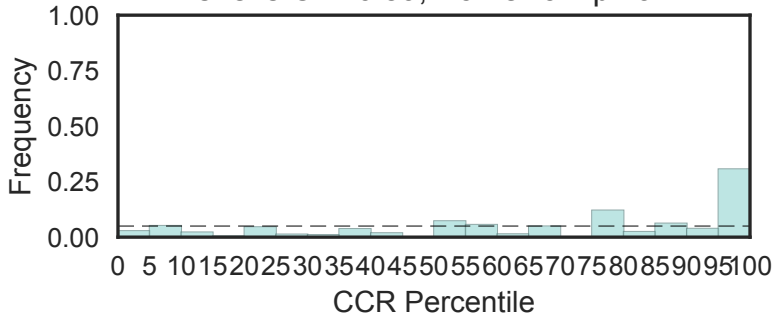

Coatomer gamma subunit appendage platform subdomain  
(COP-gamma\_platf, N=1)

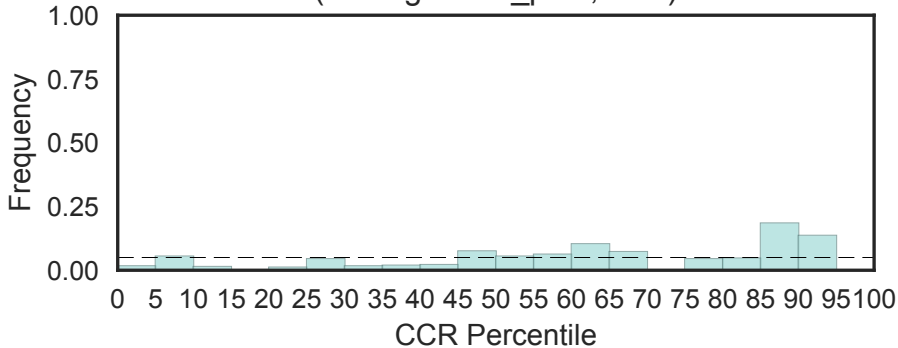

Endoplasmic reticulum vesicle transporter  
(COPIIcoated\_ERV, N=3)

Fisher's OR: 0.778; Bonferroni p-val: 1

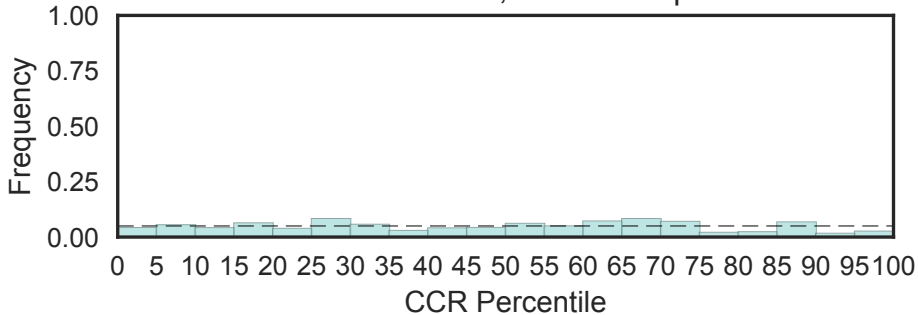

Coatomer (COPI) alpha subunit C-terminus  
(COPI\_C, N=1)

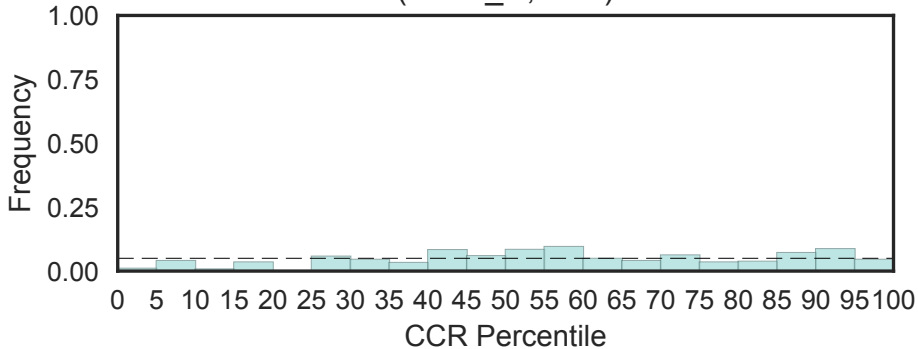



Cooperator of PRMT5 family  
(COPR5, N=1)

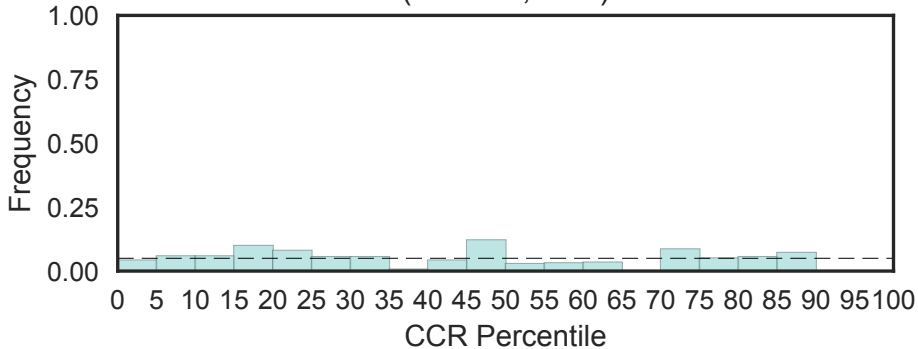

Ubiquinone biosynthesis protein COQ7  
(COQ7, N=1)

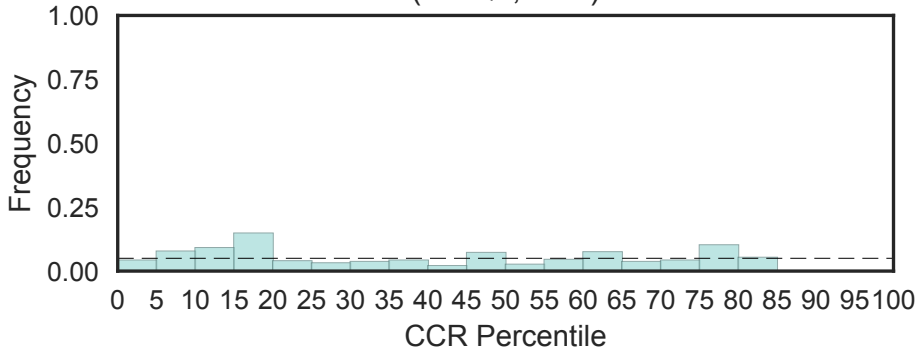

COQ9  
(COQ9, N=1)

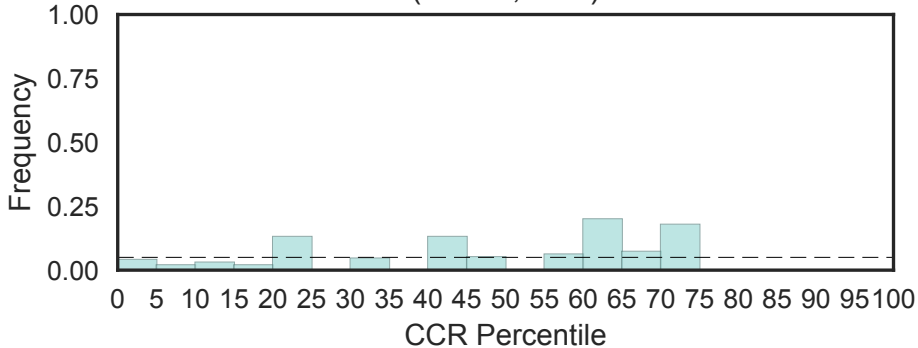

C-terminal of Roc, COR, domain  
(COR, N=2)

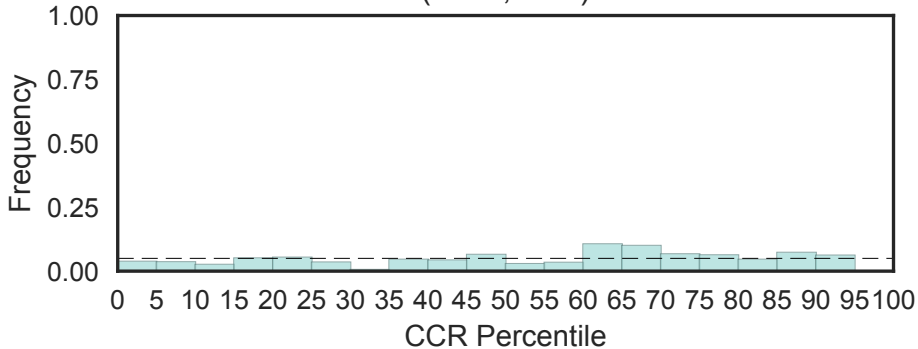

Cytochrome oxidase c assembly  
(COX14, N=1)

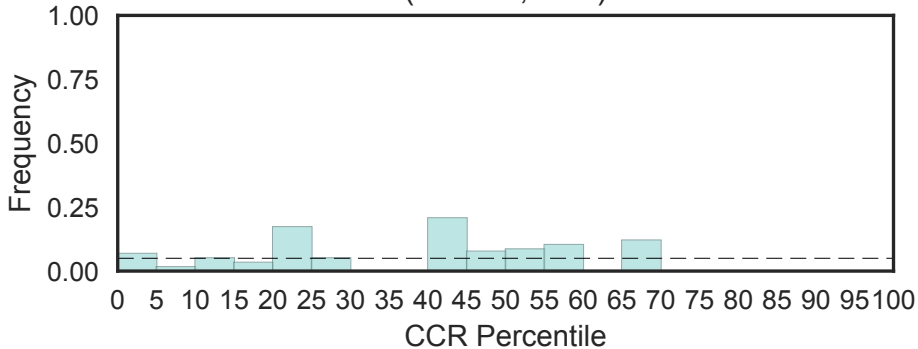

Cytochrome oxidase assembly protein  
(COX15-CtaA, N=1)

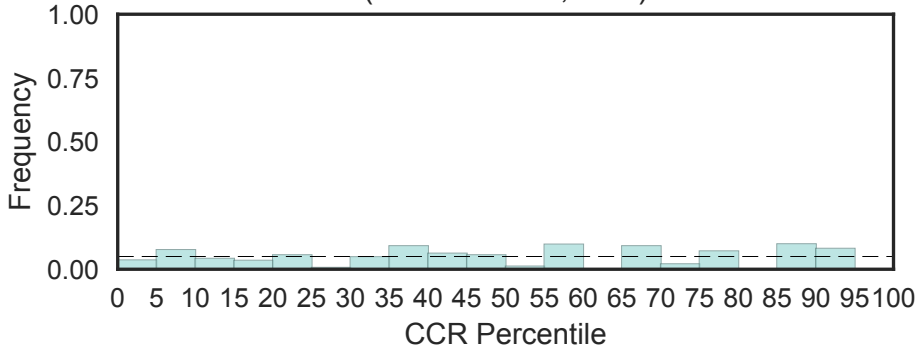

Cytochrome c oxidase assembly protein COX16  
(COX16, N=1)

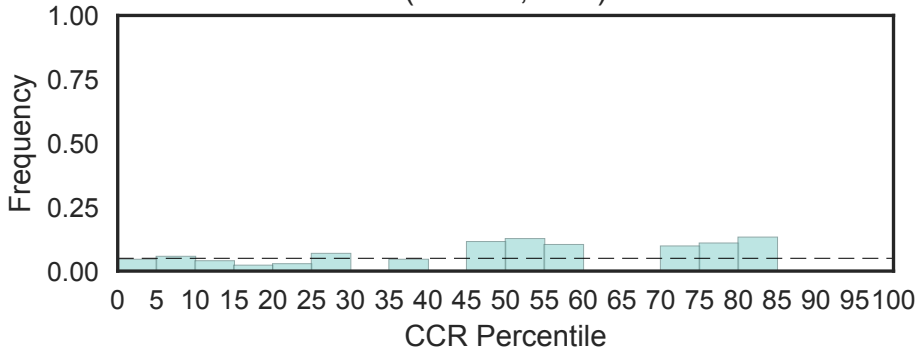

Cytochrome C oxidase copper chaperone (COX17)  
(COX17, N=1)

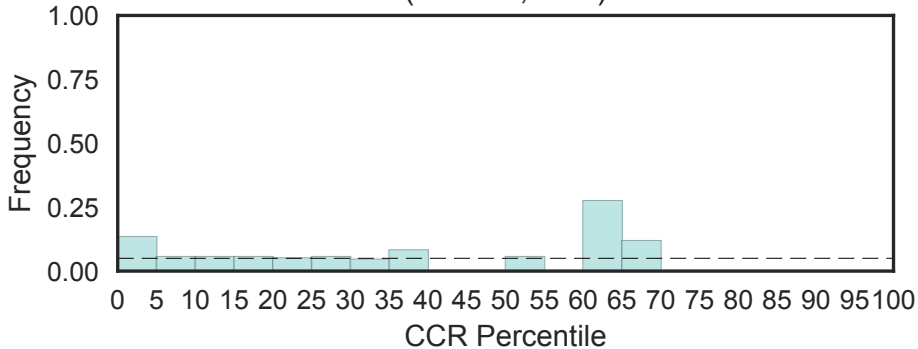



# Cytochrome c oxidase subunit IV (COX4, N=2)

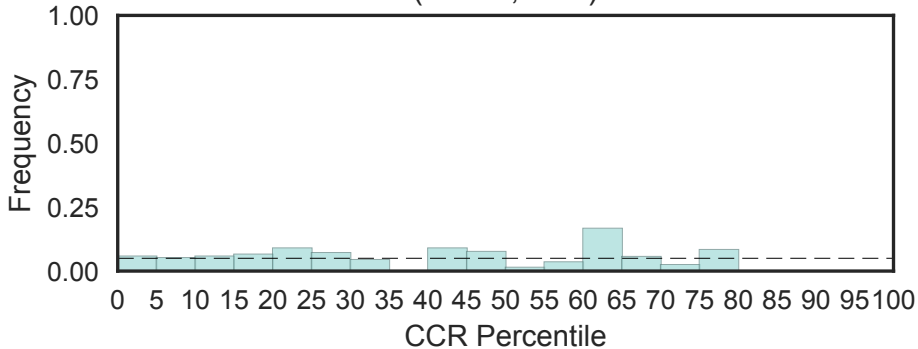

Cytochrome c oxidase subunit Va  
(COX5A, N=1)

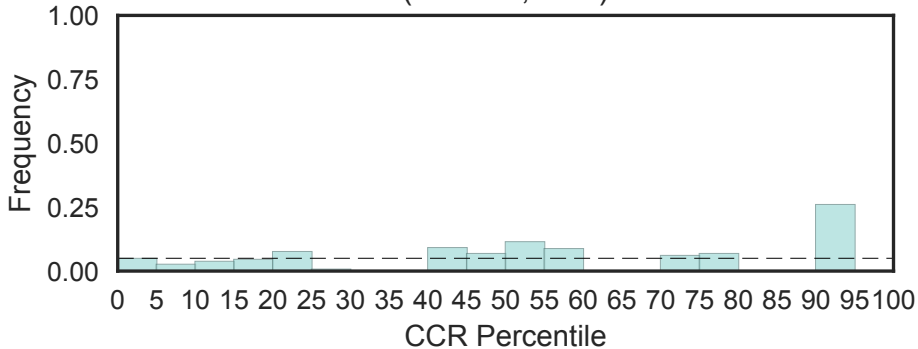

Cytochrome c oxidase subunit Vb  
(COX5B, N=1)

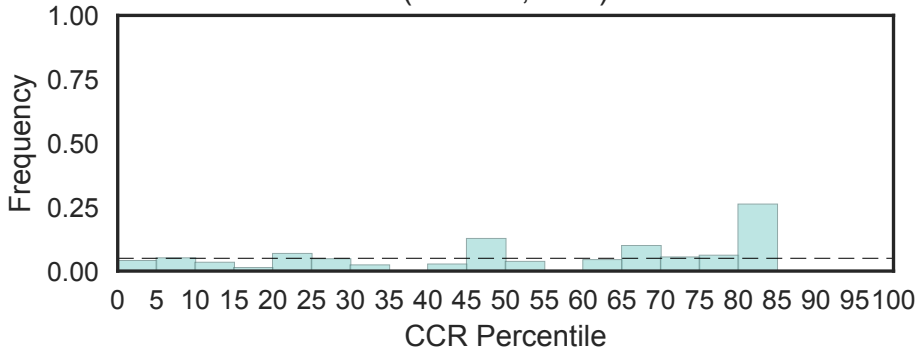

Cytochrome c oxidase subunit VIa  
(COX6A, N=3)

Fisher's OR: 0; Bonferroni p-val: 1

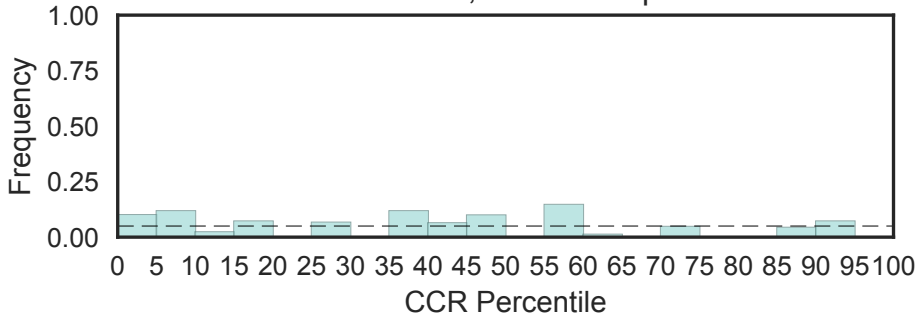

Cytochrome oxidase c subunit VIb  
(COX6B, N=3)

Fisher's OR: 1.61; Bonferroni p-val: 1

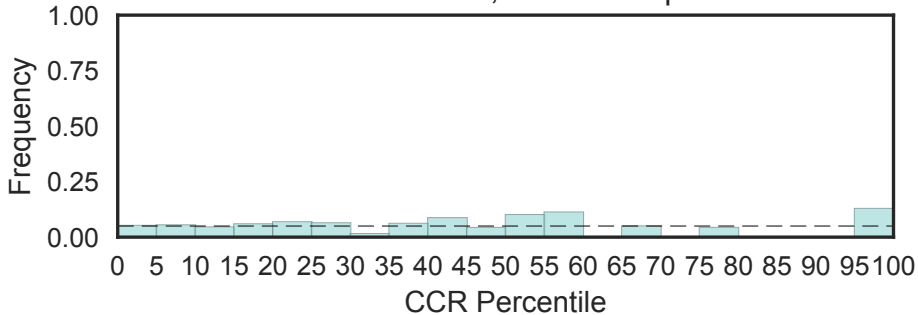

Cytochrome c oxidase subunit VIc  
(COX6C, N=1)

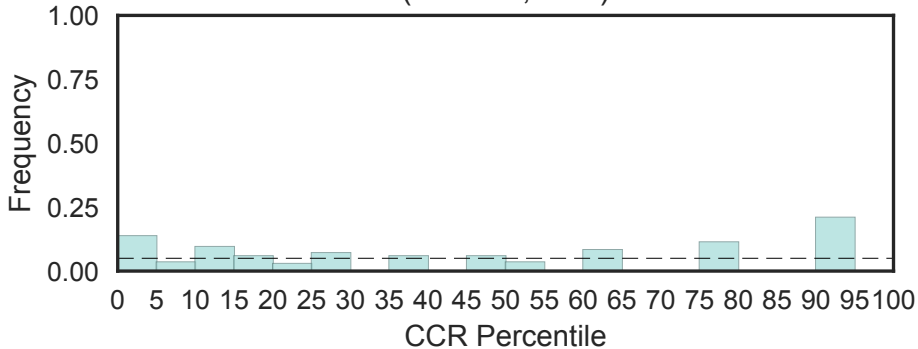

Cytochrome C oxidase chain VIIB  
(COX7B, N=1)

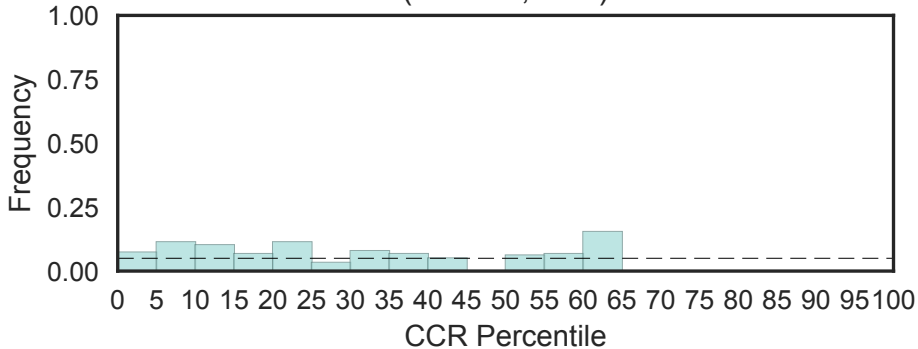

Cytochrome c oxidase subunit VIIc  
(COX7C, N=1)

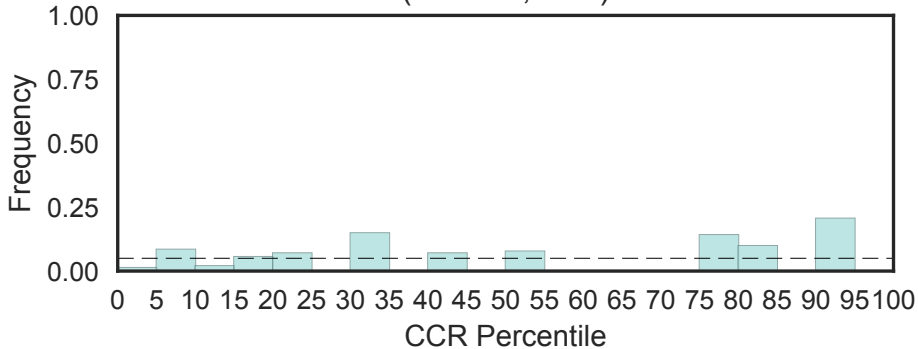



Cytochrome c oxidase subunit VII  
(COX7a, N=3)

Fisher's OR: 1.44; Bonferroni p-val: 1

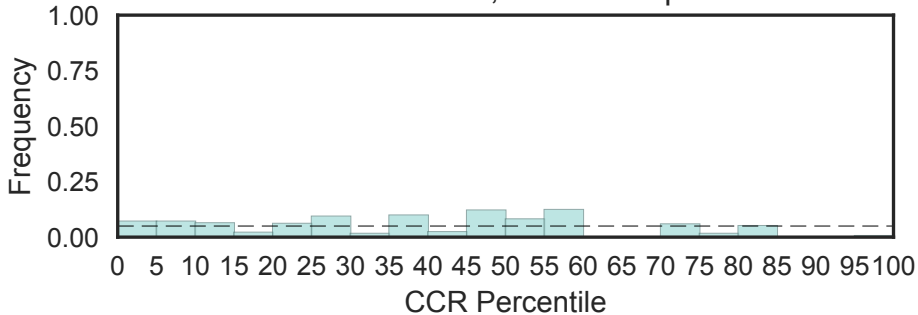

Cytochrome oxidase c subunit VIII  
(COX8, N=3)

Fisher's OR: 0; Bonferroni p-val: 1

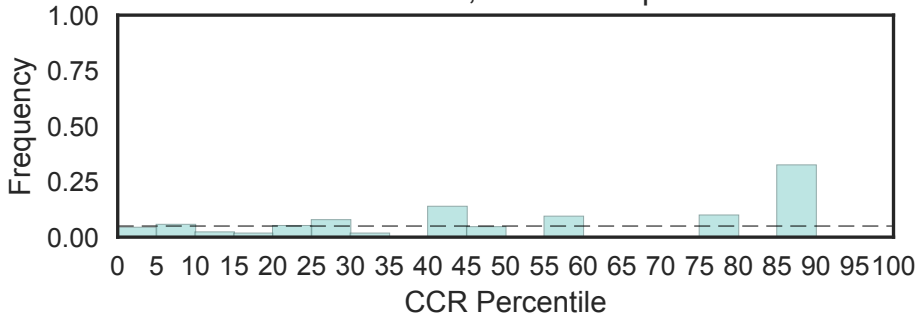

CO dehydrogenase flavoprotein C-terminal domain  
(CO\_deh\_flav\_C, N=2)

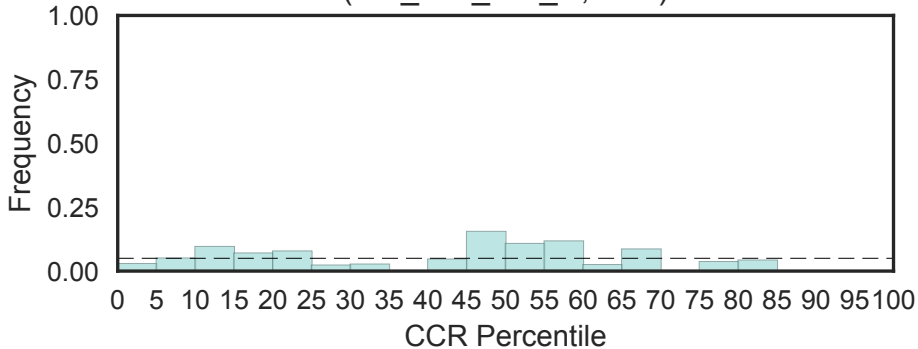

CO dehydrogenase beta subunit/acetyl-CoA synthase epsilon subunit  
(CO\_dh, N=1)

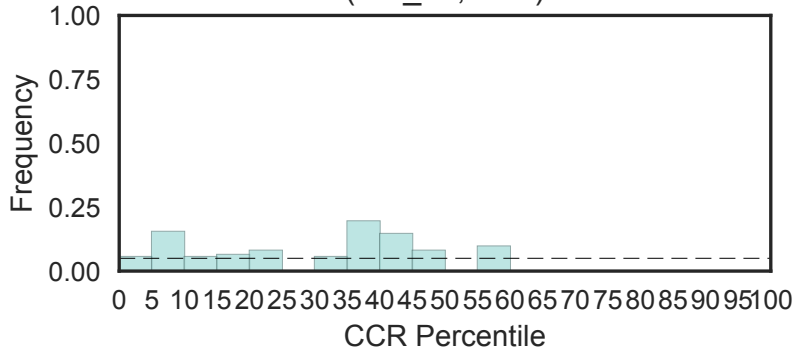

Carboxylesterase family  
(COesterase, N=19)

Fisher's OR: 1.03; Bonferroni p-val: 1

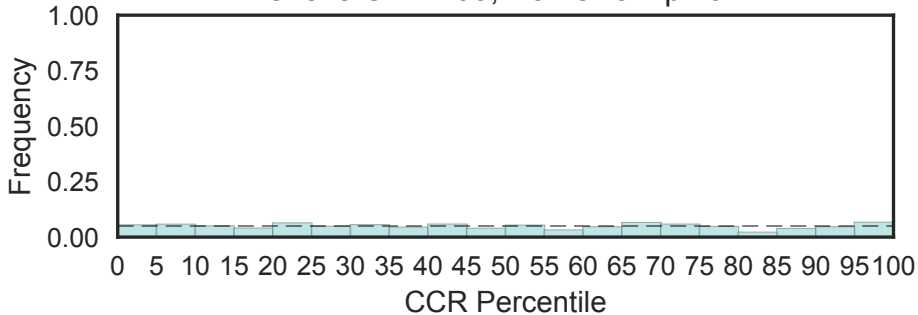

CP2 transcription factor  
(CP2, N=6)

Fisher's OR: 4.78; Bonferroni p-val: 0.0429

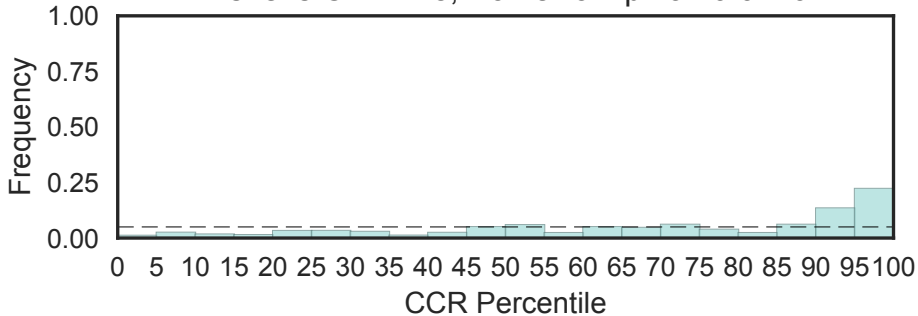

CPL (NUC119) domain  
(CPL, N=1)

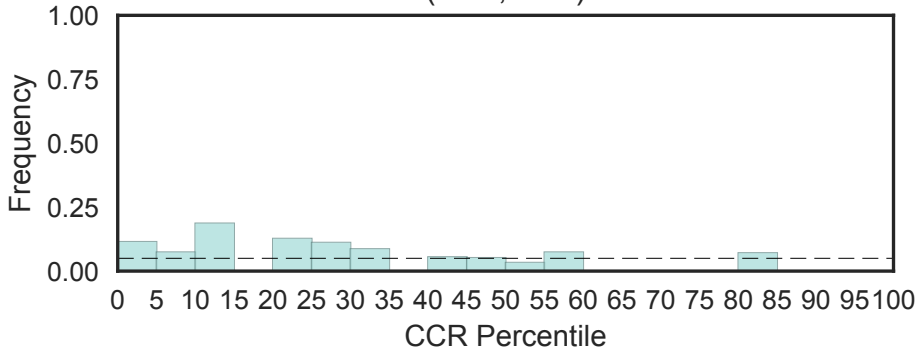

# Cleavage and polyadenylation factor 2 C-terminal (CPSF100\_C, N=1)

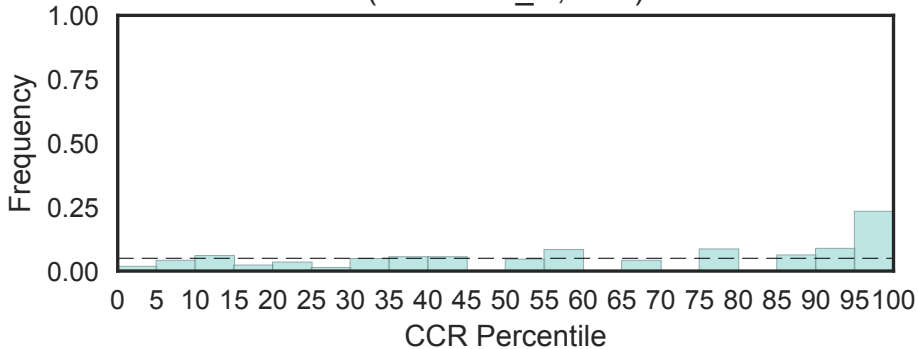



Pre-mRNA 3'-end-processing endonuclease polyadenylation factor C-term  
(CPSF73-100\_C, N=1)

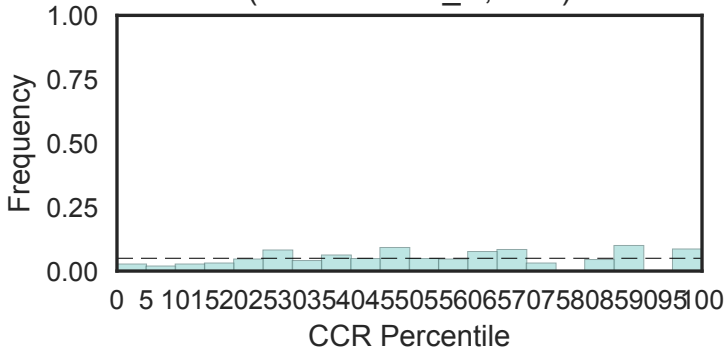

CPSF A subunit region  
(CPSF\_A, N=3)

Fisher's OR: 6.95; Bonferroni p-val: 0.068

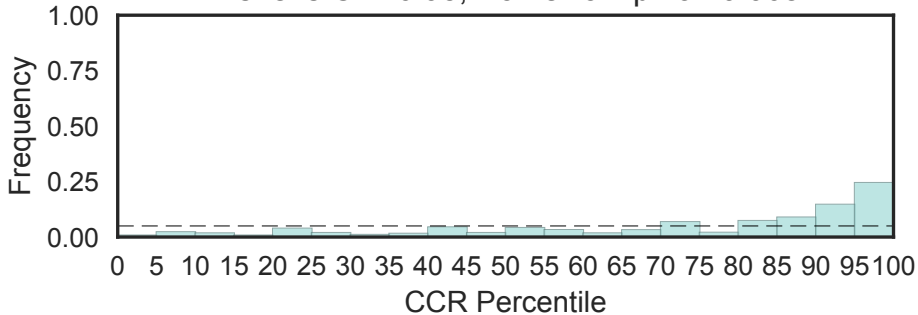

Carbamoyl-phosphate synthase L chain, ATP binding domain  
(CPSase\_L\_D2, N=10)

Fisher's OR: 1.62; Bonferroni p-val: 1

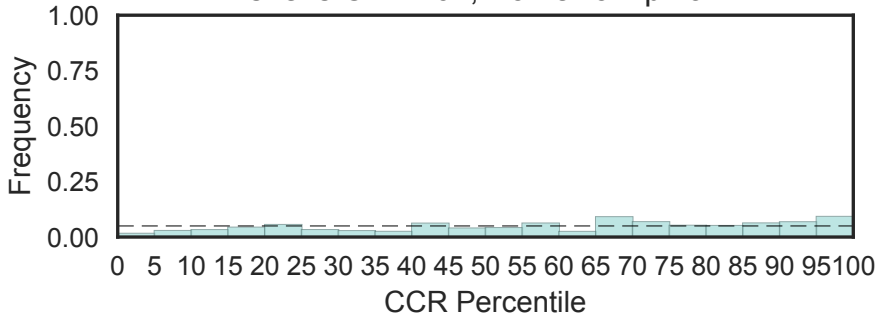

Carbamoyl-phosphate synthetase large chain, oligomerisation domain  
(CPSase\_L\_D3, N=2)

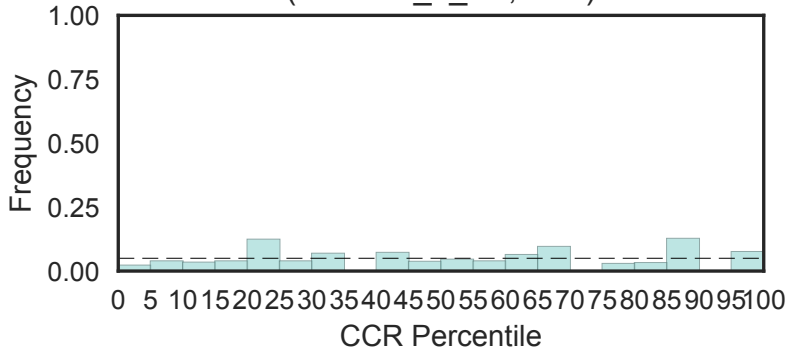

Carbamoyl-phosphate synthase small chain, CPSase domain  
(CPSase\_sm\_chain, N=2)

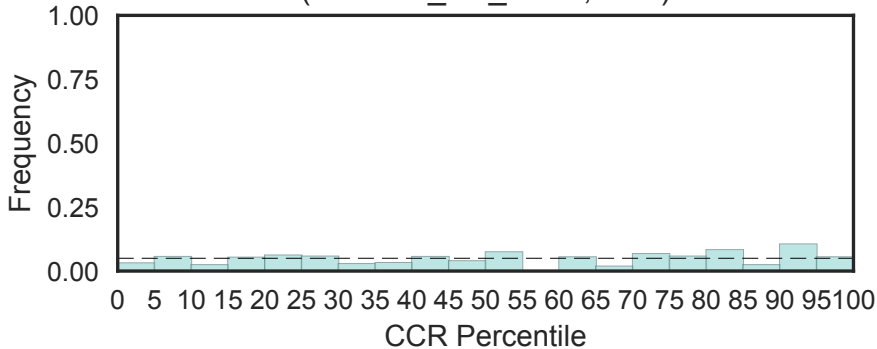

# Chloramphenicol phosphotransferase-like protein (CPT, N=1)

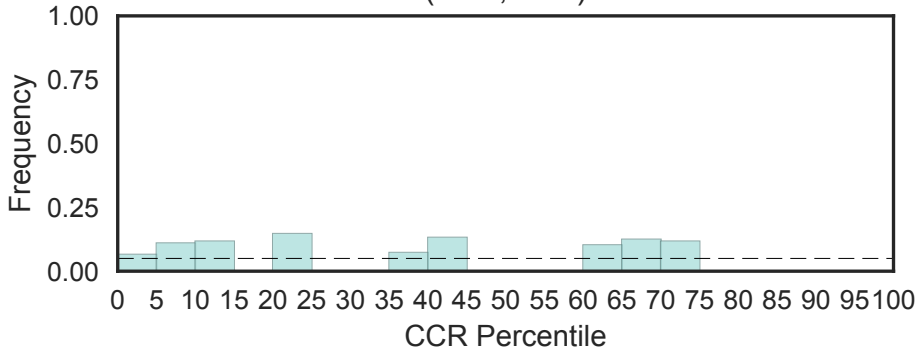

Carnitine O-palmitoyltransferase N-terminus  
(CPT\_N, N=3)

Fisher's OR: 0; Bonferroni p-val: 1

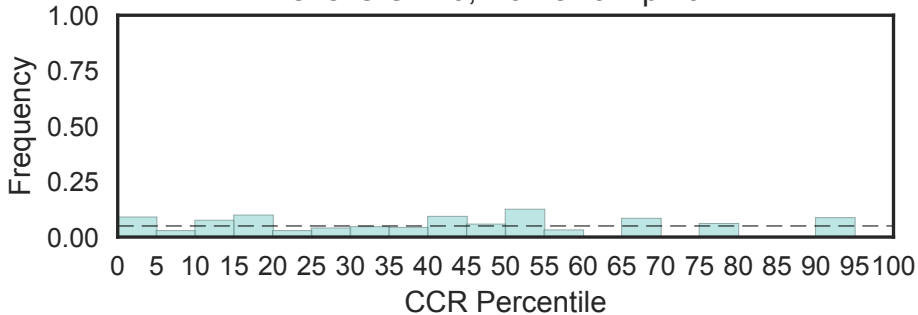

# Growth arrest and DNA-damage-inducible proteins-interacting protein 1 (CR6\_interact, N=1)

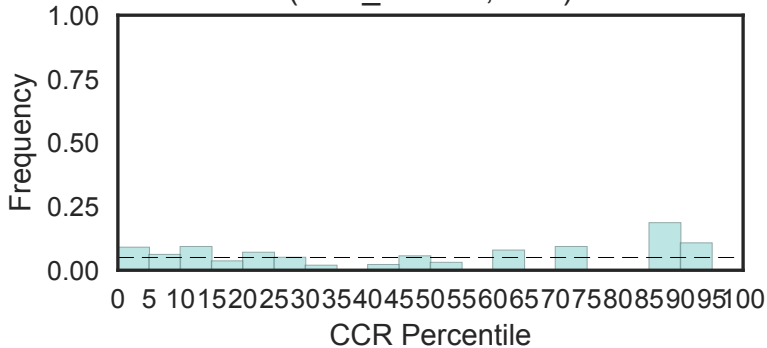



CRAL/TRIO domain  
(CRAL\_TRIO, N=24)

Fisher's OR: 0.905; Bonferroni p-val: 1

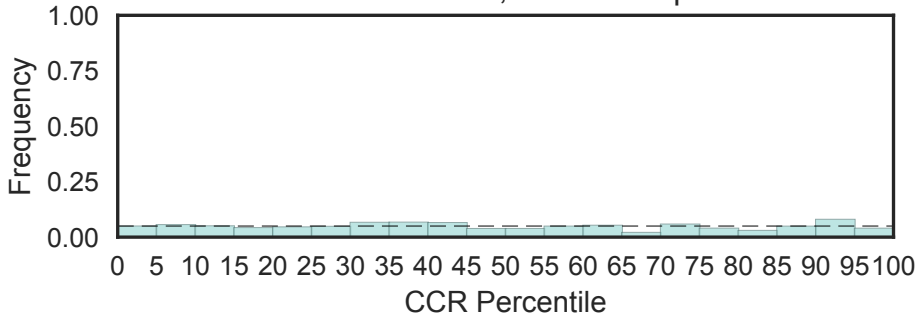

Divergent CRAL/TRIO domain  
(CRAL\_TRIO\_2, N=27)  
Fisher's OR: 1.12; Bonferroni p-val: 1

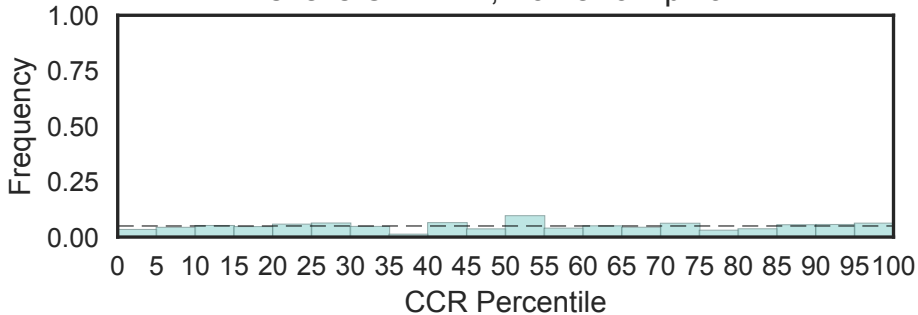

CRAL/TRIO, N-terminal domain  
(CRAL\_TRIO\_N, N=7)

Fisher's OR: 0; Bonferroni p-val: 1

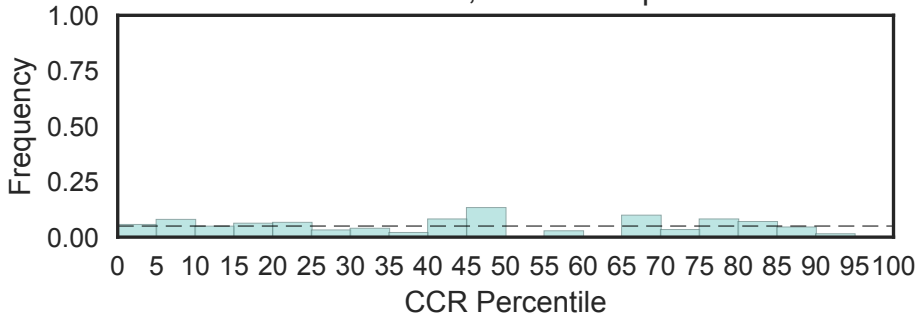

# Cell-cycle alteration and expression-elevated protein in tumour (CREPT, N=3)

Fisher's OR: 3.76; Bonferroni p-val: 1

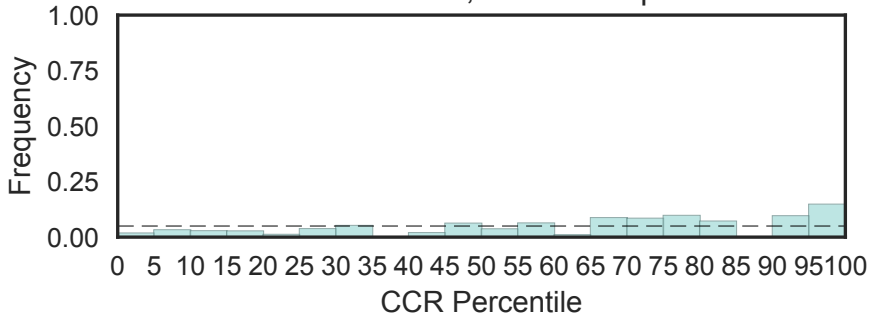

Corticotropin-releasing factor family  
(CRF, N=4)

Fisher's OR: 2.21; Bonferroni p-val: 1

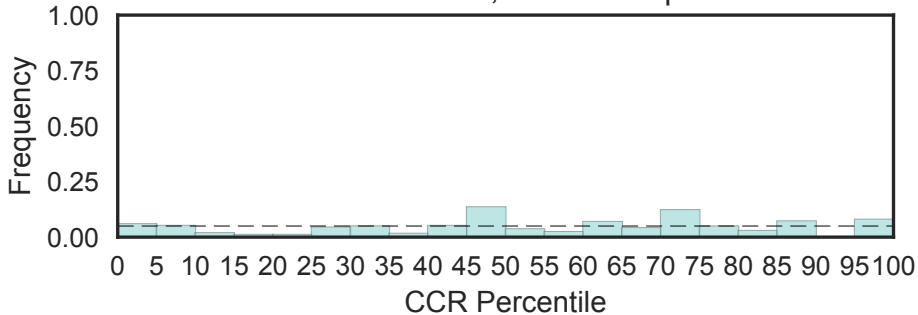

Corticotropin-releasing factor binding protein (CRF-BP)  
(CRF-BP, N=1)

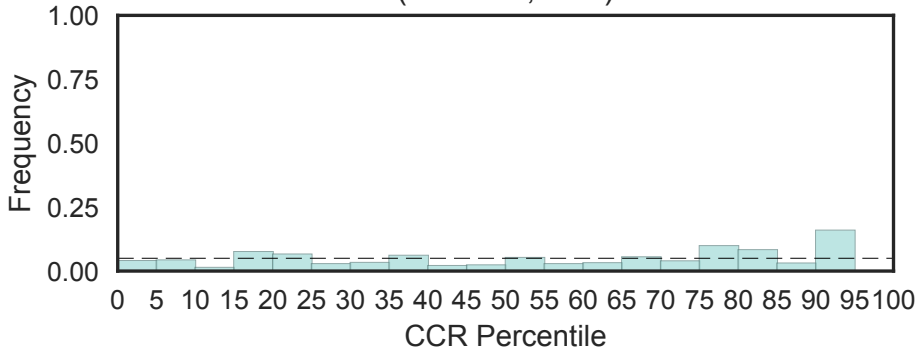

Connector enhancer of kinase suppressor of ras  
(CRIC\_ras\_sig, N=2)

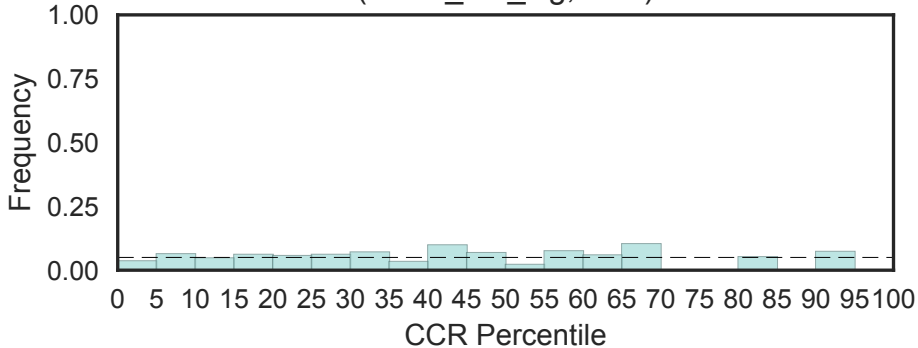

# SAPK-interacting protein 1 (Sin1), middle CRIM domain (CRIM, N=1)

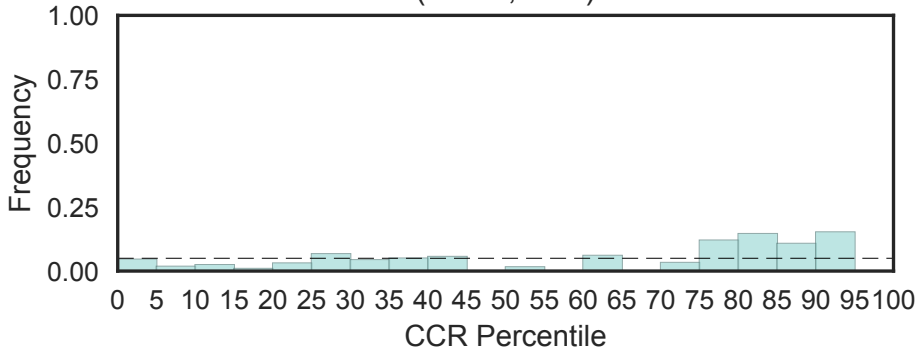



CRM1 C terminal  
(CRM1\_C, N=2)

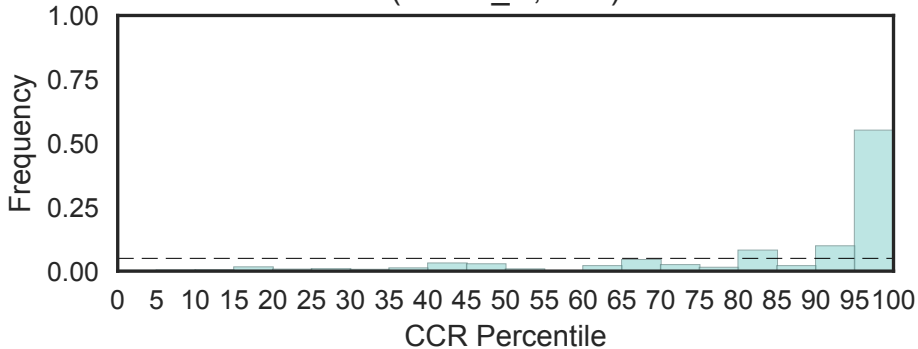

CRT-like, chloroquine-resistance transporter-like  
(CRT-like, N=3)

Fisher's OR: 0.651; Bonferroni p-val: 1

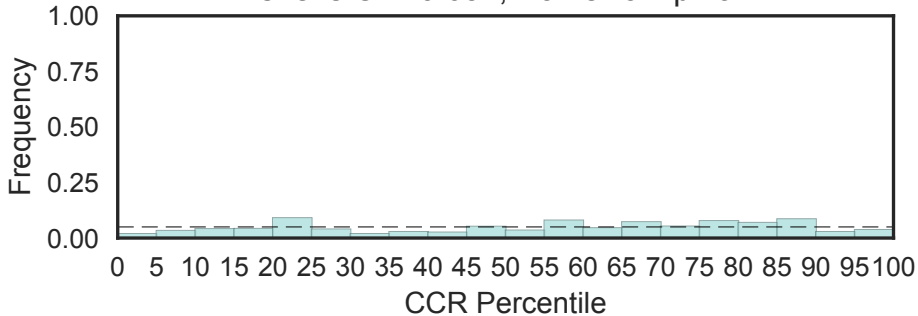

eIF2-alpha phosphatase phosphorylation constitutive repressor  
(CReP\_N, N=1)

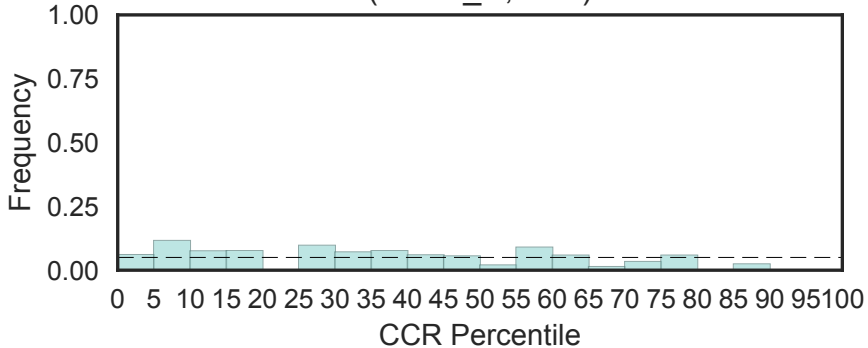

CS domain  
(CS, N=14)

Fisher's OR: 0.586; Bonferroni p-val: 1

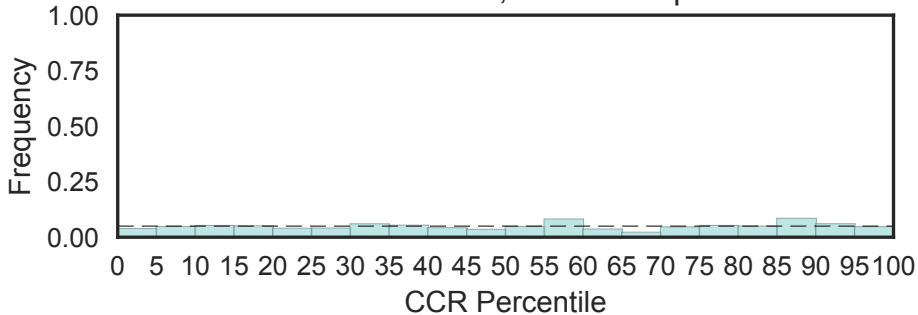

'Cold-shock' DNA-binding domain  
(CSD, N=12)

Fisher's OR: 3.63; Bonferroni p-val: 1

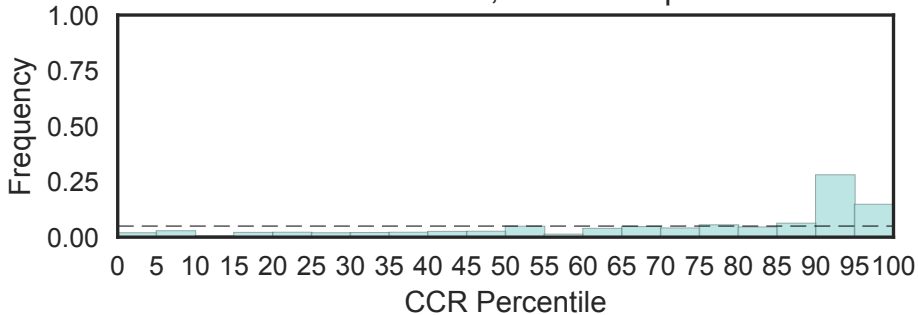

Macrophage colony stimulating factor-1 (CSF-1)  
(CSF-1, N=1)

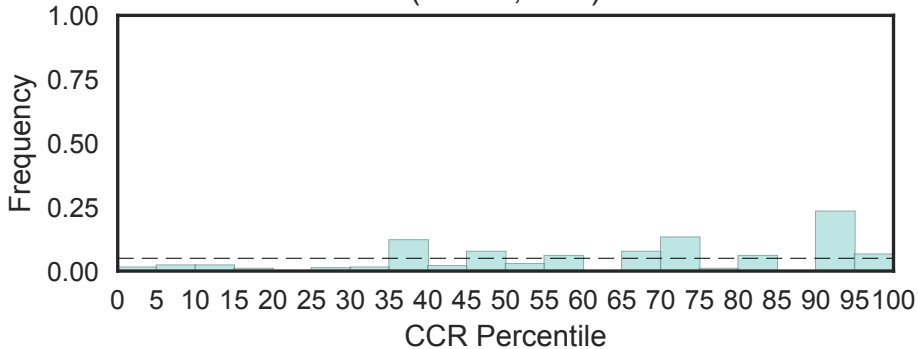

CSN8/PSMD8/EIF3K family  
(CSN8\_PSD8 EIF3K, N=3)  
Fisher's OR: 0.73; Bonferroni p-val: 1

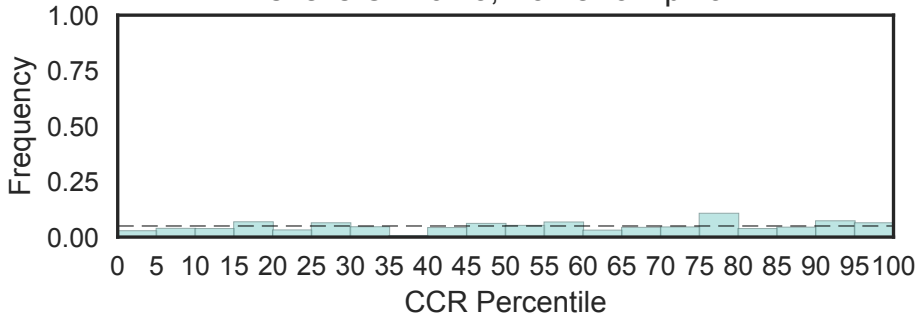

Cysteine/serine-rich nuclear protein N-terminus  
(CSRNP\_N, N=3)

Fisher's OR: 1.08; Bonferroni p-val: 1

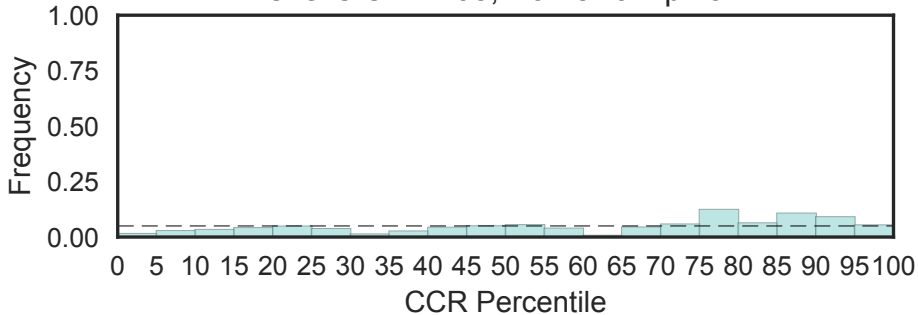



# Cleavage stimulation factor subunit 1, dimerisation domain (CSTF1\_dimer, N=1)

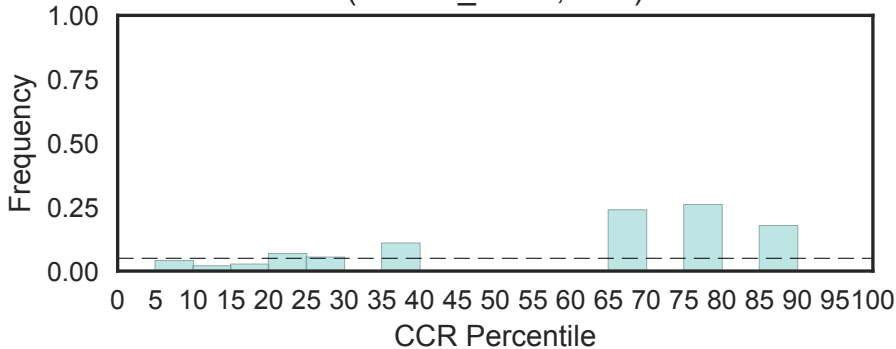

# Hinge domain of cleavage stimulation factor subunit 2 (CSTF2\_hinge, N=1)

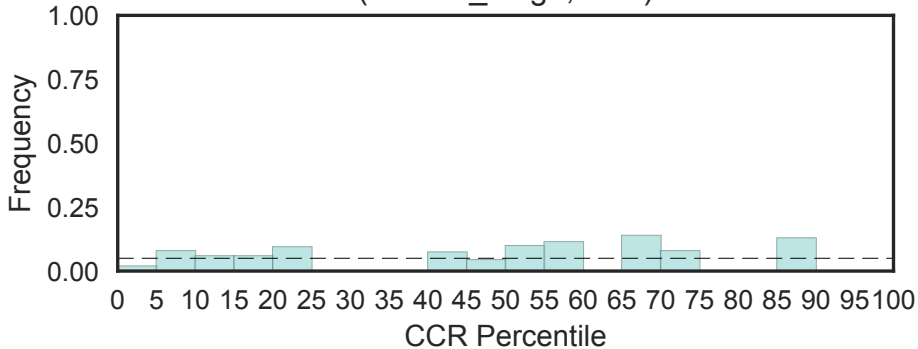

# Transcription termination and cleavage factor C-terminal (CSTF\_C, N=1)

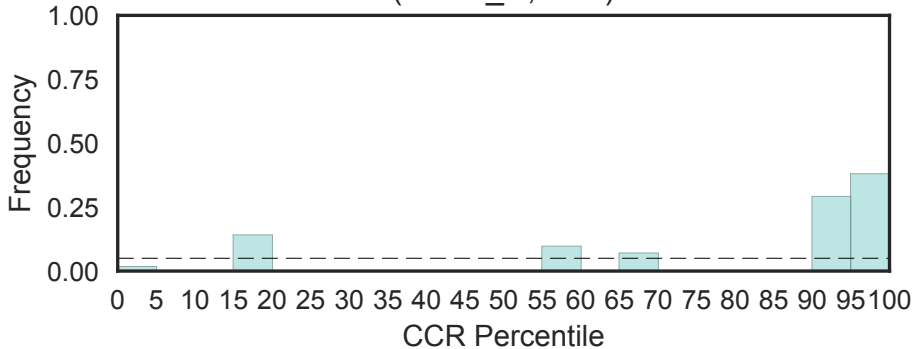

CST, telomere maintenance, complex subunit CTC1  
(CTC1, N=1)

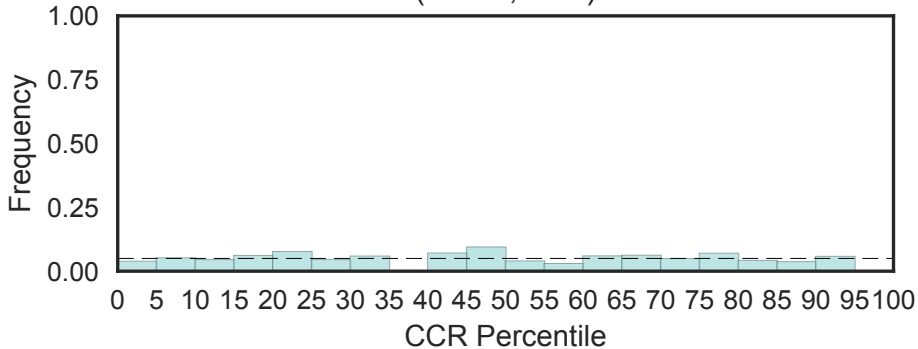

# RNA polymerase II-binding domain.

(CTD\_bind, N=7)

Fisher's OR: 29.2; Bonferroni p-val: 9.61e-08

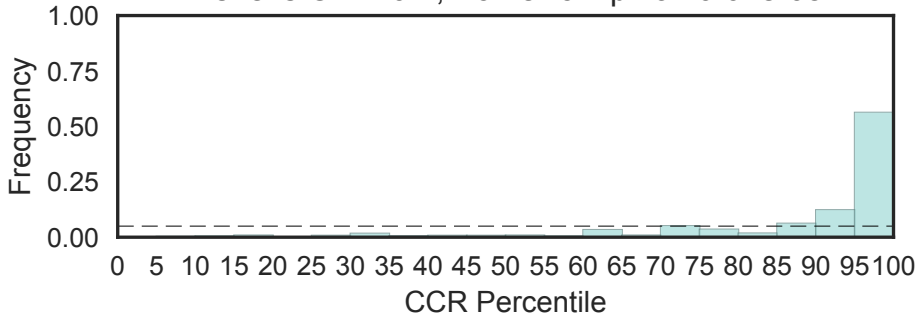

CTF/NF- $\kappa$ B family transcription modulation region  
(CTF\_NFI, N=4)

Fisher's OR: 3.19; Bonferroni p-val: 1

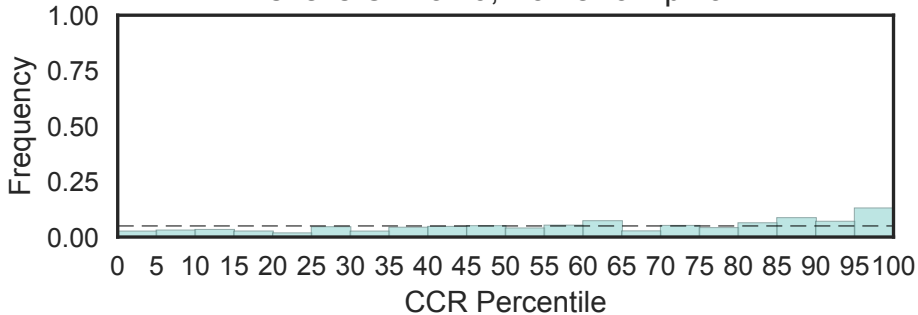

N-terminal CTNNB1 binding  
(CTNNB1\_binding, N=4)  
Fisher's OR: 2.18; Bonferroni p-val: 1

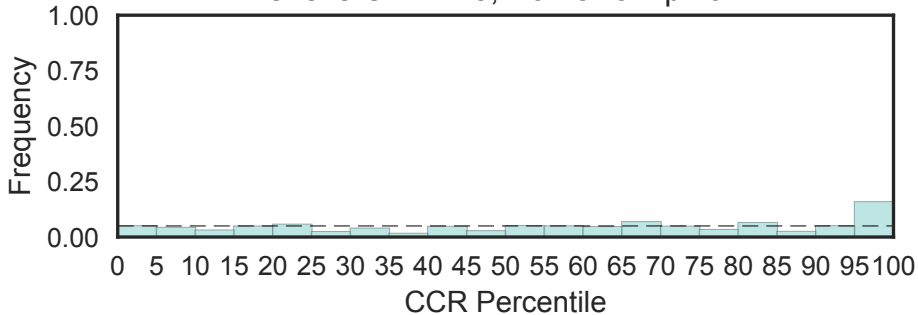

Catenin-beta-like, Arm-motif containing nuclear  
(CTNNBL, N=1)

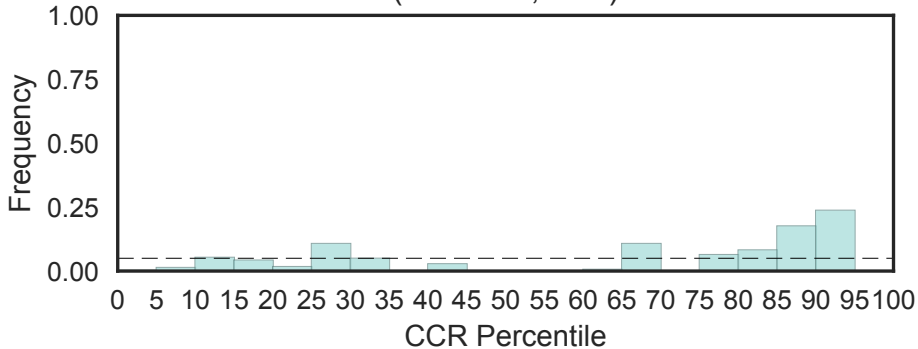



CTP synthase N-terminus  
(CTP\_synth\_N, N=1)

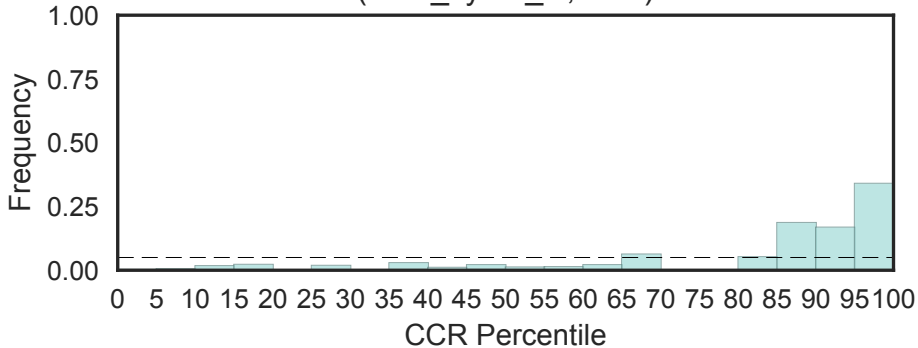

Cytidylyltransferase family  
(CTP\_transf\_1, N=2)

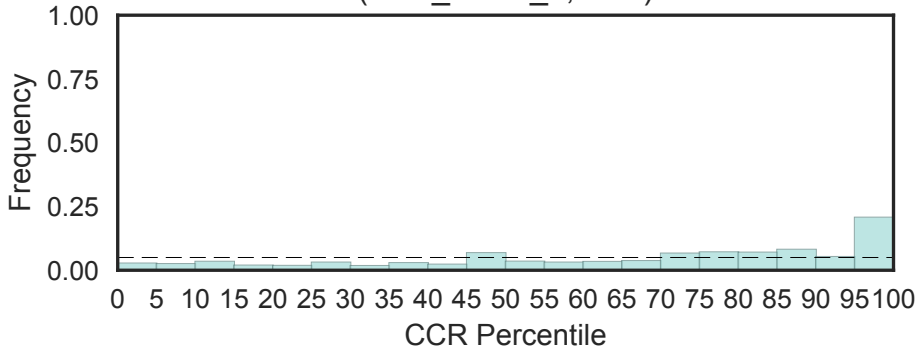

Cytidylyltransferase  
(CTP\_transf\_3, N=1)

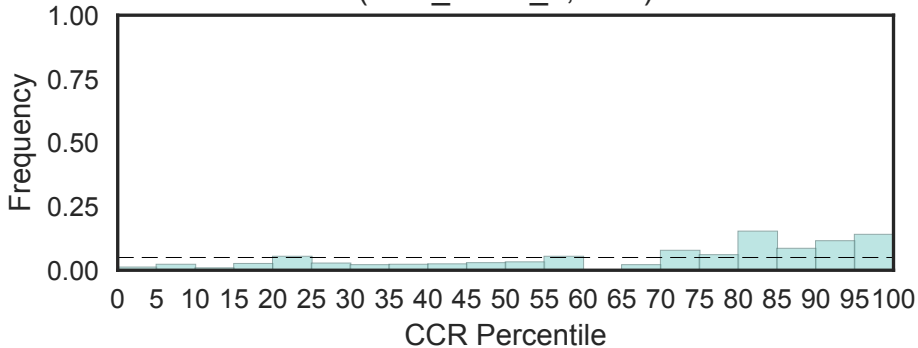

Cytidylyltransferase-like  
(CTP\_transf\_like, N=8)

Fisher's OR: 0.238; Bonferroni p-val: 1

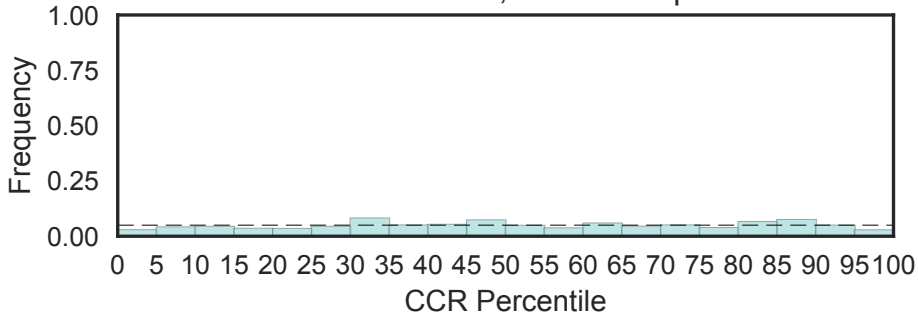

Cytoplasmic tRNA 2-thiolation protein 2  
(CTU2, N=1)

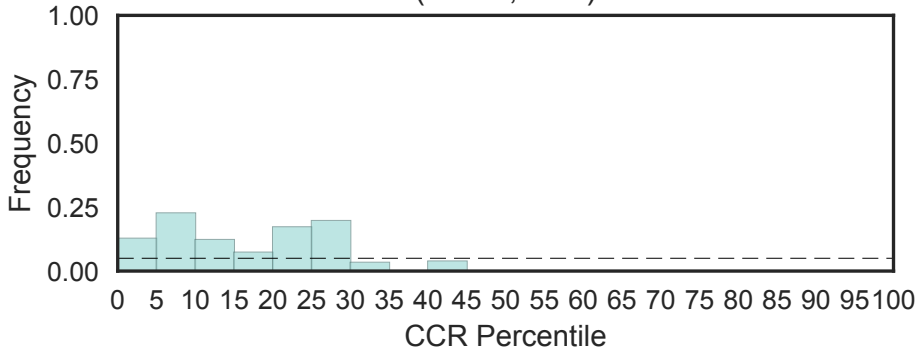

CUB domain  
(CUB, N=150)

Fisher's OR: 0.443; Bonferroni p-val: 0.0266

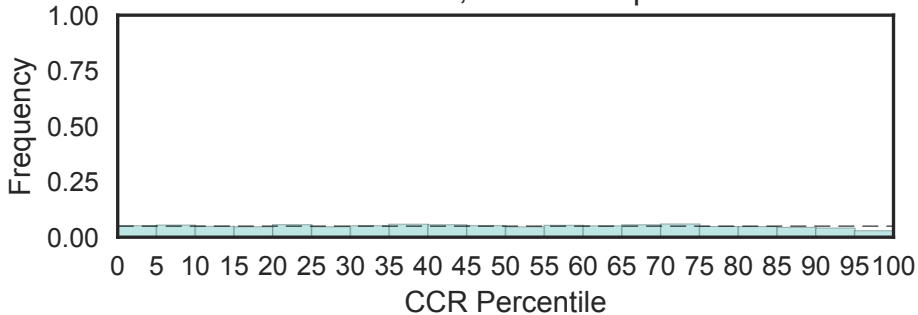

CUB-like domain  
(CUB\_2, N=1)

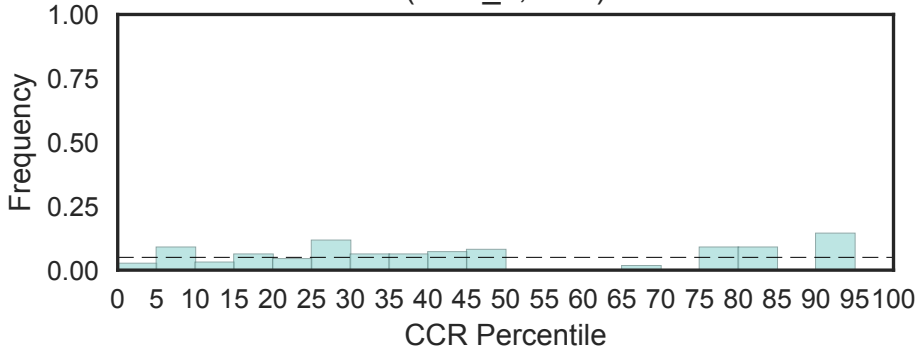

CUE domain  
(CUE, N=7)

Fisher's OR: 0; Bonferroni p-val: 1

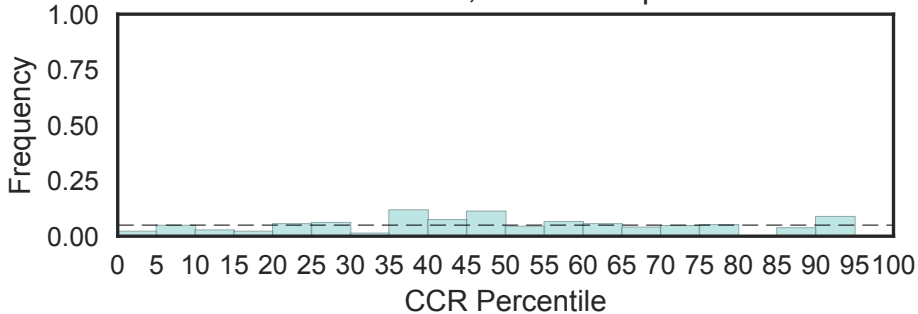



CUT domain  
(CUT, N=13)

Fisher's OR: 12.1; Bonferroni p-val: 3.35e-09

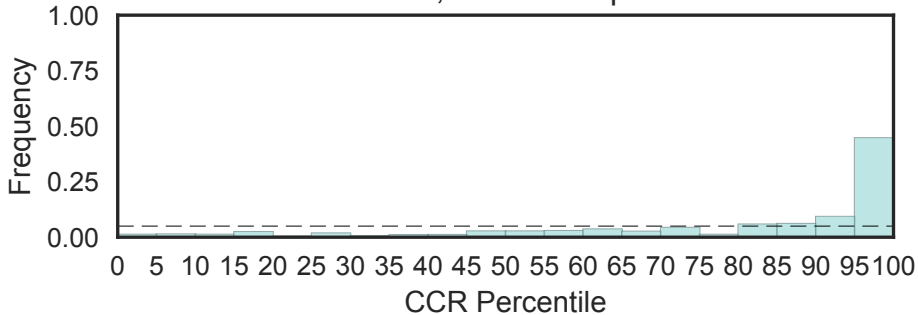

CUT1-like DNA-binding domain of SATB  
(CUTL, N=2)

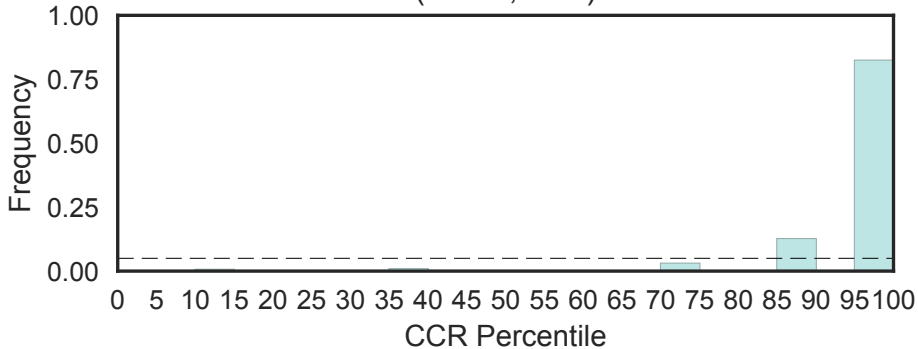

Putative cell wall binding repeat  
(CW\_binding\_1, N=2)

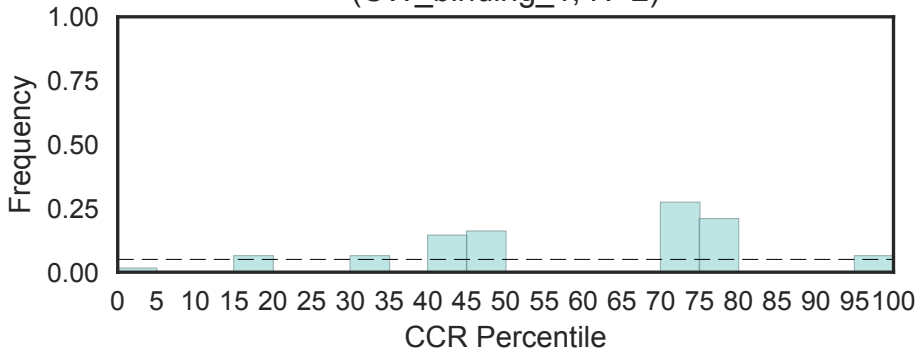

CHCH-CHCH-like Cx9C, IMS import disulfide relay-system,  
(CX9C, N=1)

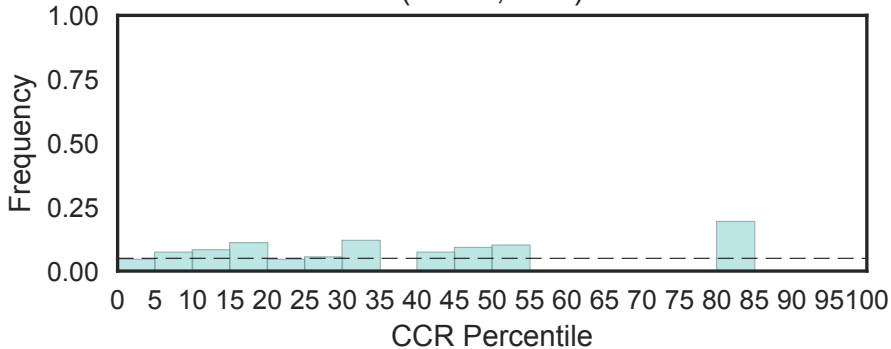

VEGF co-regulated chemokine 1  
(CXCL17, N=1)

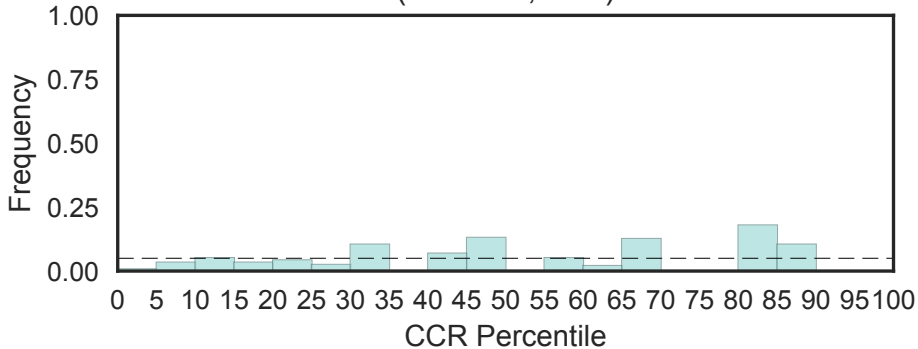

CXCR4 Chemokine receptor N terminal  
(CXCR4\_N, N=1)

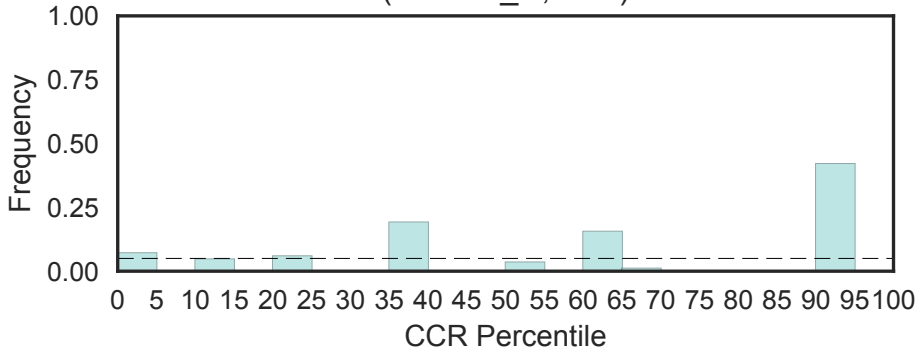

CXCXC repeat  
(CXCXC, N=2)

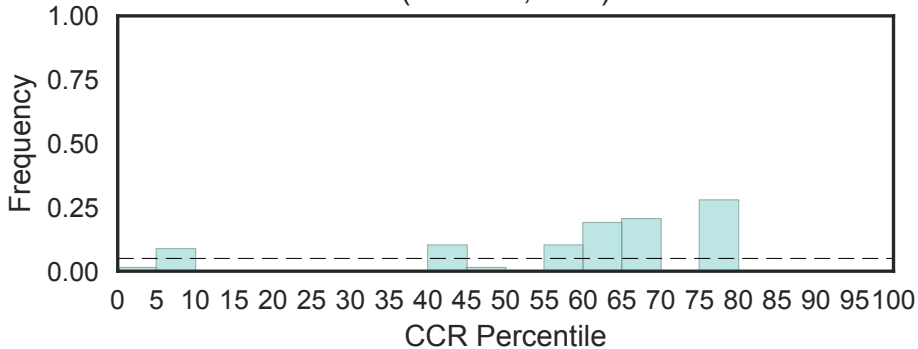

Phosphorylation region of CYLD, unstructured  
(CYLD\_phos\_site, N=1)

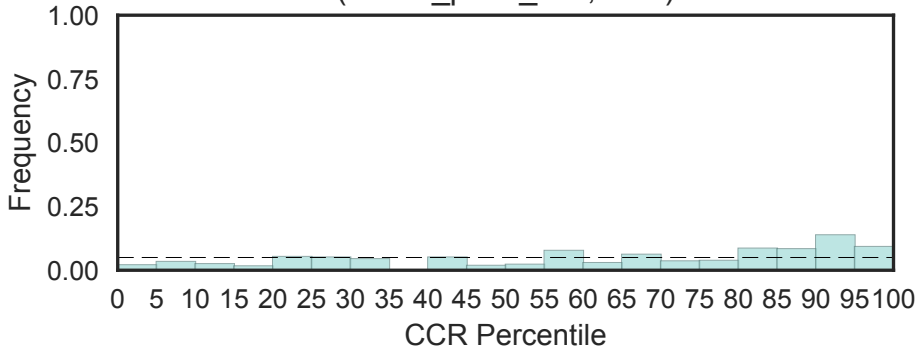



# Cysteine-rich TM module stress tolerance (CYSTM, N=1)

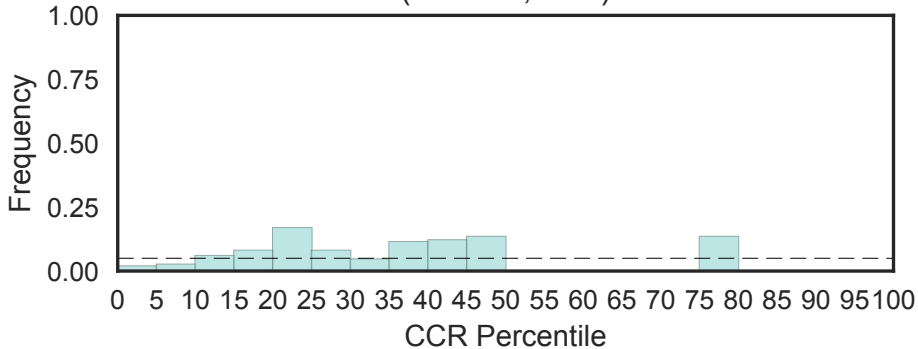

CYTH domain  
(CYTH, N=1)

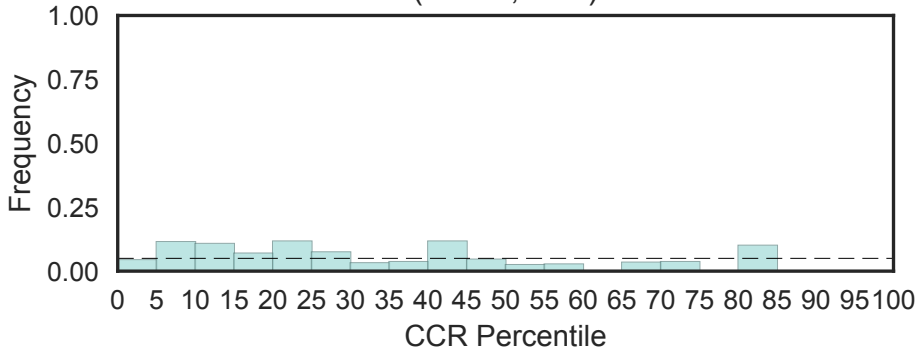

Cytokine-like protein 1  
(CYTL1, N=1)

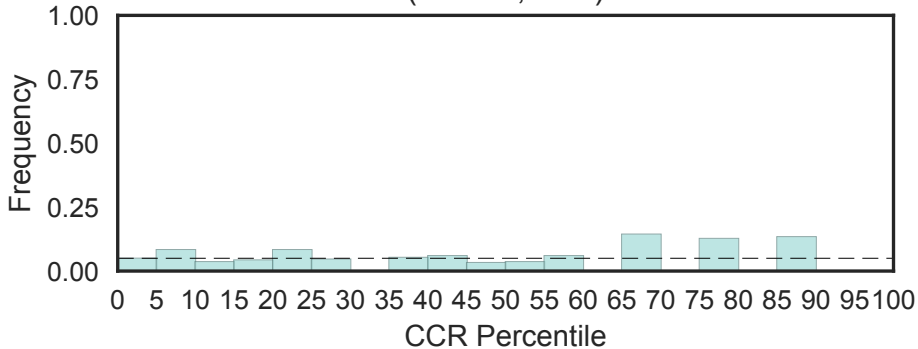

Cysteine and tyrosine-rich protein 1  
(CYR1, N=1)

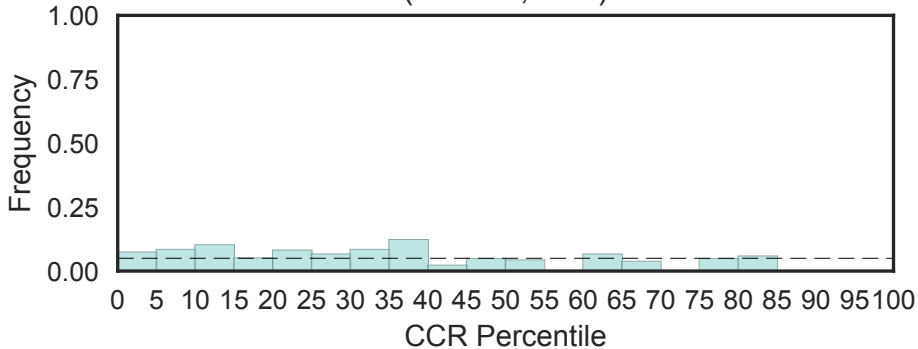

Cysteine rich repeat  
(C\_tripleX, N=1)

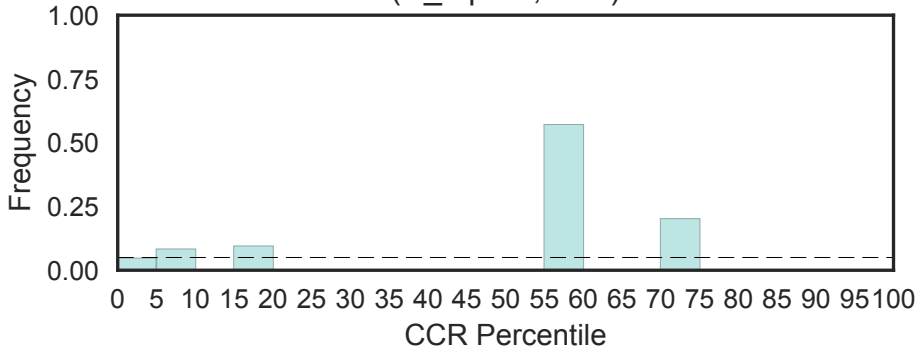

Calcium-activated potassium channel, beta subunit  
(CaKB, N=4)

Fisher's OR: 0; Bonferroni p-val: 1

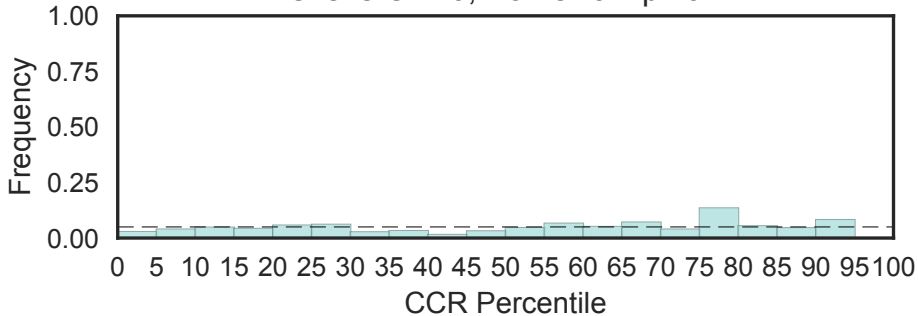

# Calcium/calmodulin-dependent protein kinase II inhibitor (CaM-KIIN, N=2)

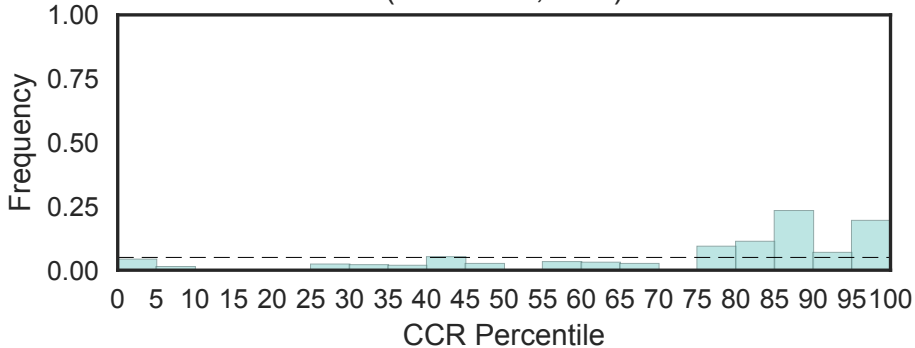

Calmodulin binding domain  
(CaMBD, N=4)

Fisher's OR: 4.37; Bonferroni p-val: 1

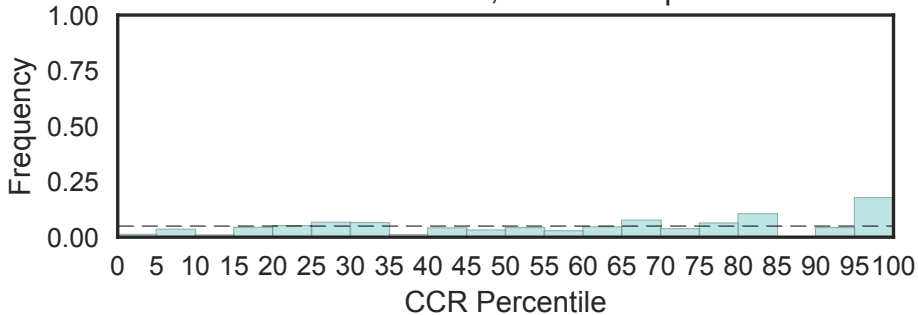



Calcium/calmodulin dependent protein kinase II association domain  
(CaMKII\_AD, N=4)

Fisher's OR: 3.43; Bonferroni p-val: 1

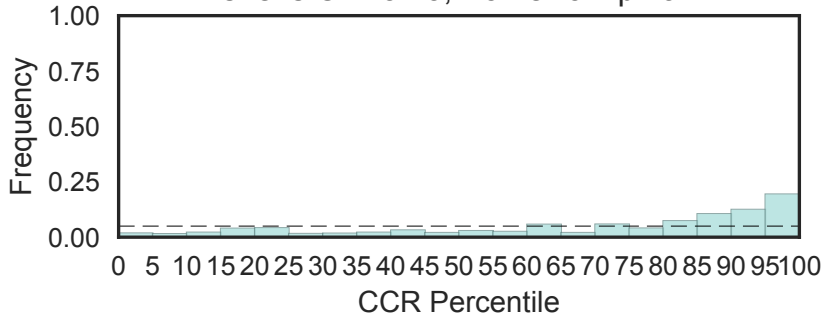

Calmodulin-binding domain C0 of NMDA receptor NR1 subunit  
(CaM\_bdg\_C0, N=1)

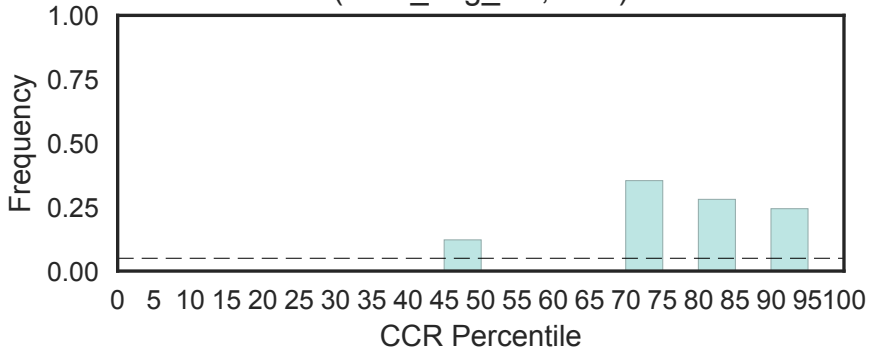

Voltage gated calcium channel IQ domain  
(Ca\_chan\_IQ, N=6)

Fisher's OR: 5.25; Bonferroni p-val: 1

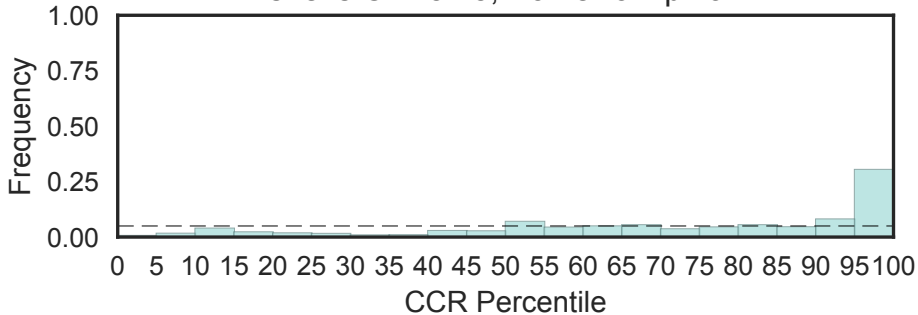

Calcium homeostasis modulator  
(Ca\_hom\_mod, N=7)

Fisher's OR: 0; Bonferroni p-val: 1

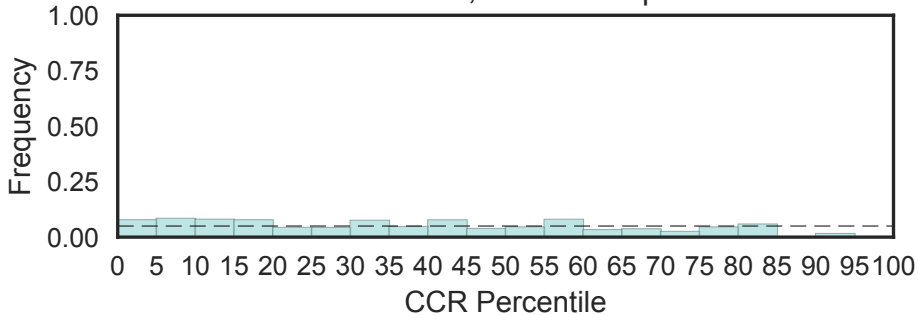

Cactus-binding C-terminus of cactin protein  
(CactinC\_cactus, N=1)

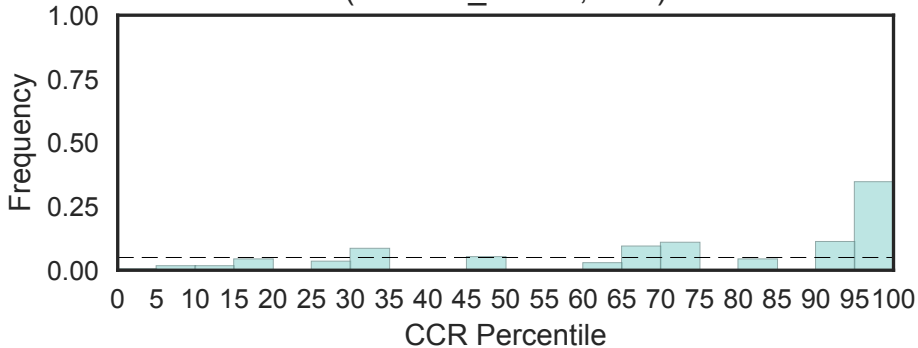

Conserved mid region of cactin  
(Cactin\_mid, N=1)

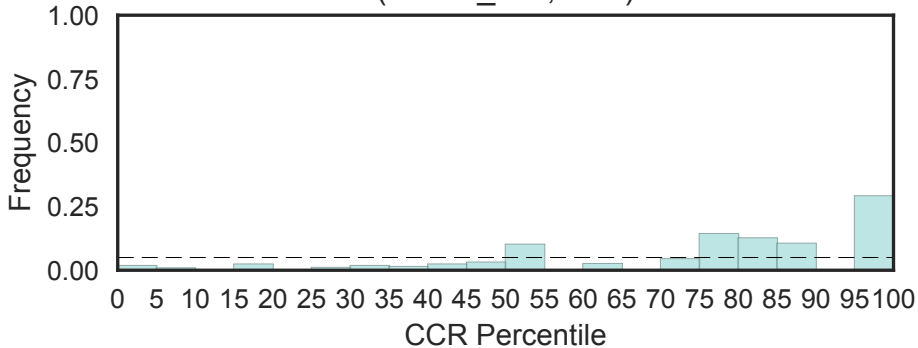

Cadherin domain  
(Cadherin, N=673)

Fisher's OR: 0.2; Bonferroni p-val: 1.49e-41

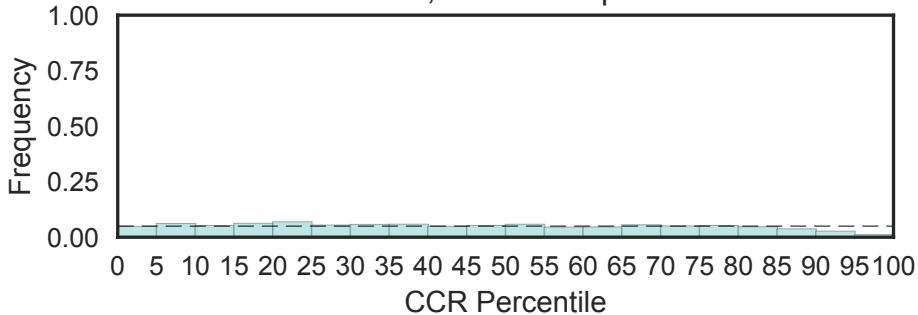

Cadherin-like beta sandwich domain  
(Cadherin-like, N=1)

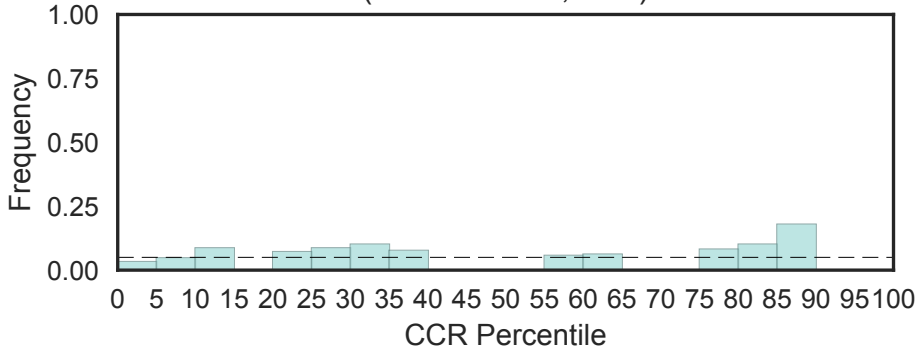



Cadherin-like  
(Cadherin\_2, N=60)

Fisher's OR: 0.164; Bonferroni p-val: 0.166

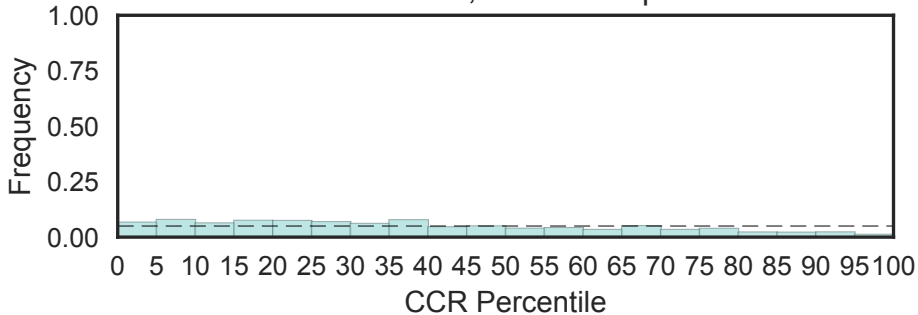

Cadherin-like  
(Cadherin\_3, N=63)

Fisher's OR: 0.0455; Bonferroni p-val: 9.65e-05

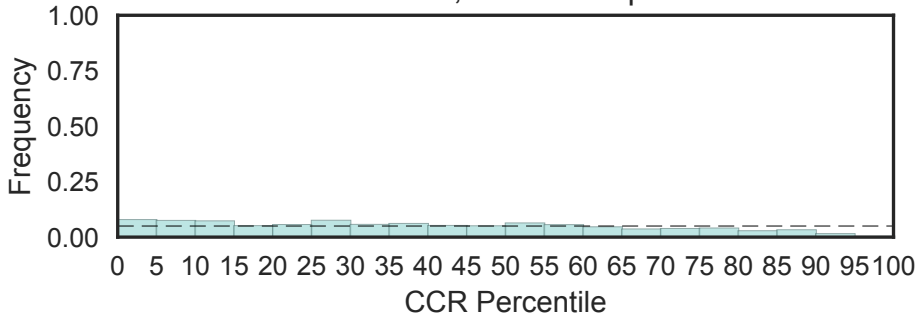

Cadherin cytoplasmic region  
(Cadherin\_C, N=24)

Fisher's OR: 0.437; Bonferroni p-val: 1

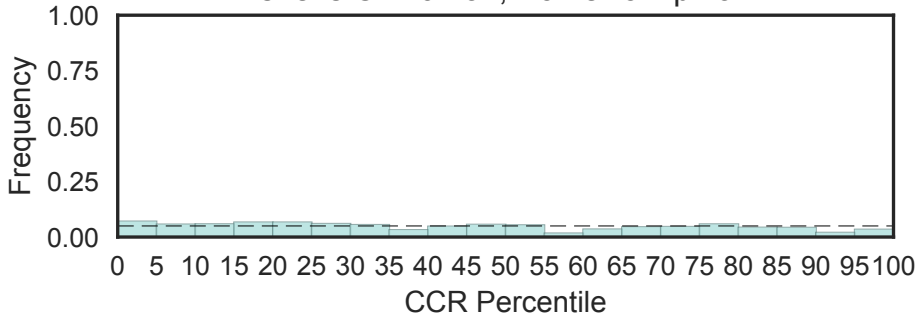

Cadherin cytoplasmic C-terminal  
(Cadherin\_C\_2, N=41)

Fisher's OR: 0; Bonferroni p-val: 1

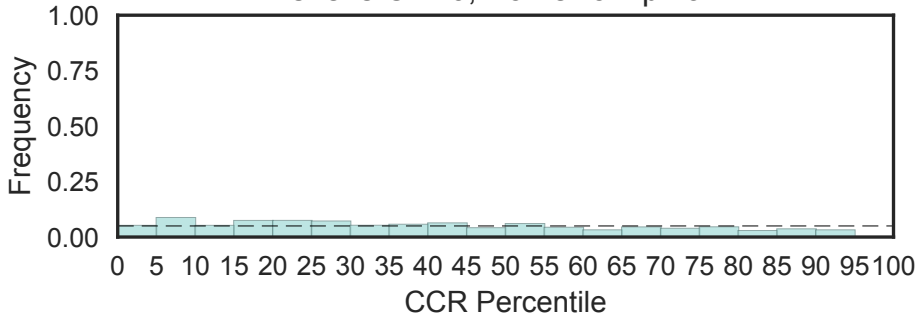

Cadherin prodomain like  
(Cadherin\_pro, N=8)

Fisher's OR: 0.3331; Bonferroni p-val: 1

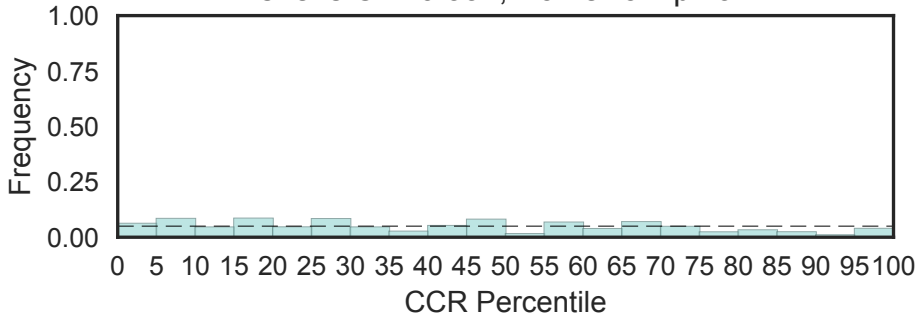

Cadherin C-terminal cytoplasmic tail, catenin-binding region  
(Cadherin\_tail, N=36)

Fisher's OR: 0; Bonferroni p-val: 0.000188

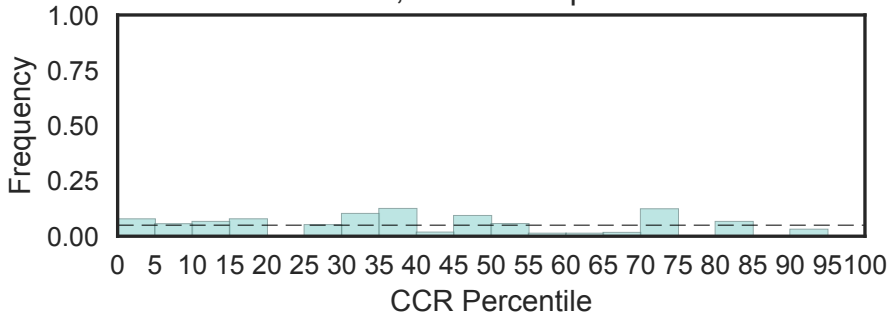

Calcitonin / CGRP / IAPP family  
(Calc\_CGRP\_IAPP, N=5)

Fisher's OR: 0; Bonferroni p-val: 1

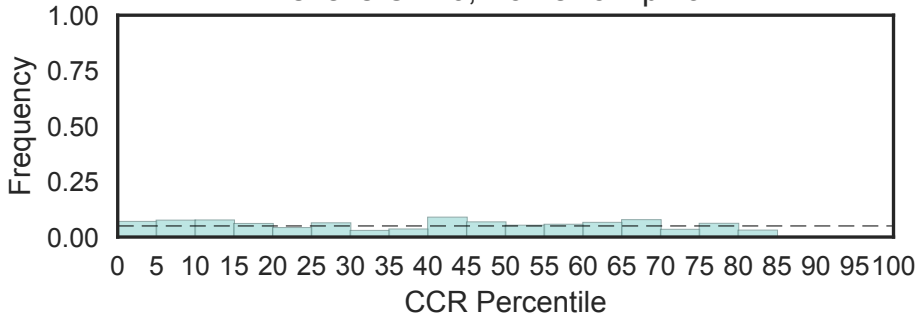

# Calcipressin

(Calcipressin, N=3)

Fisher's OR: 0.452; Bonferroni p-val: 1

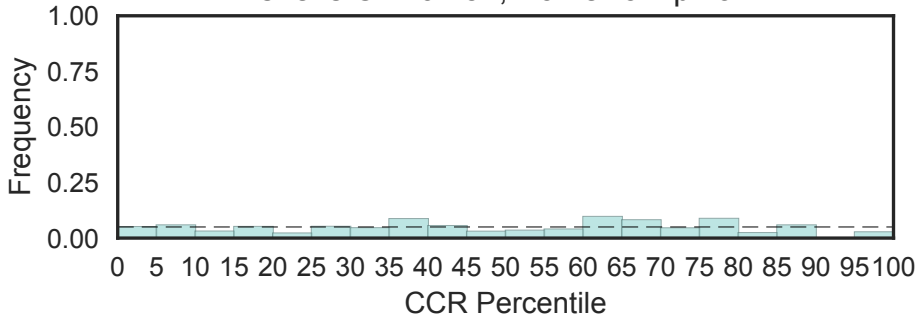



D1 dopamine receptor-interacting protein (calcyon)  
(Calcyon, N=4)

Fisher's OR: 0; Bonferroni p-val: 1

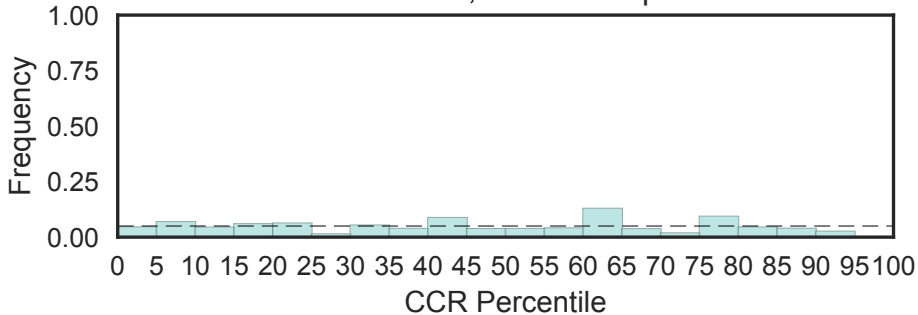

# Caldesmon (Caldesmon, N=2)

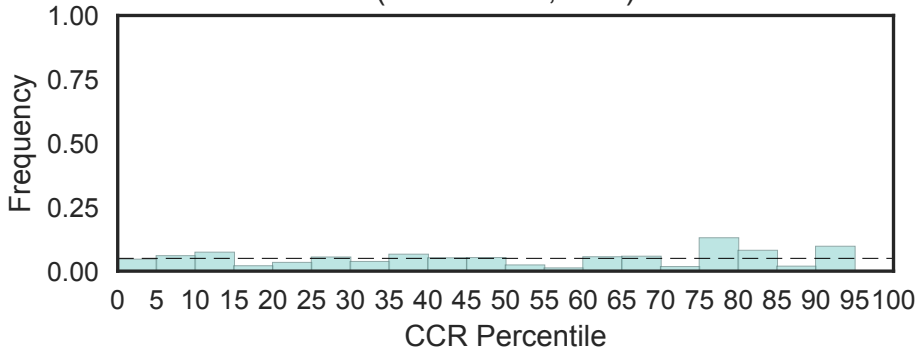

Calpain large subunit, domain III  
(Calpain\_III, N=13)

Fisher's OR: 0; Bonferroni p-val: 1

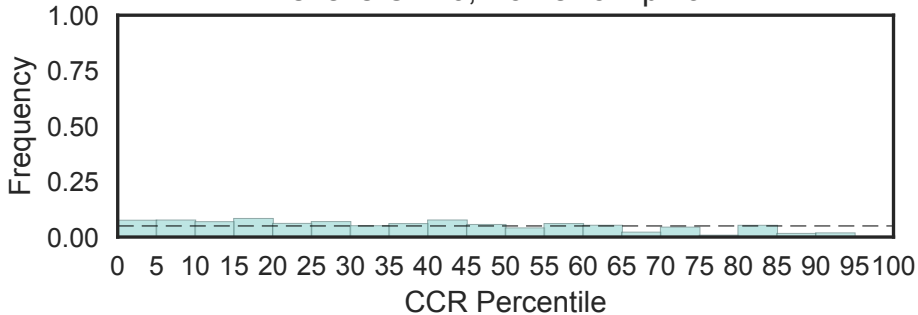

Calpain inhibitor  
(Calpain\_inhib, N=5)  
Fisher's OR: 0; Bonferroni p-val: 1

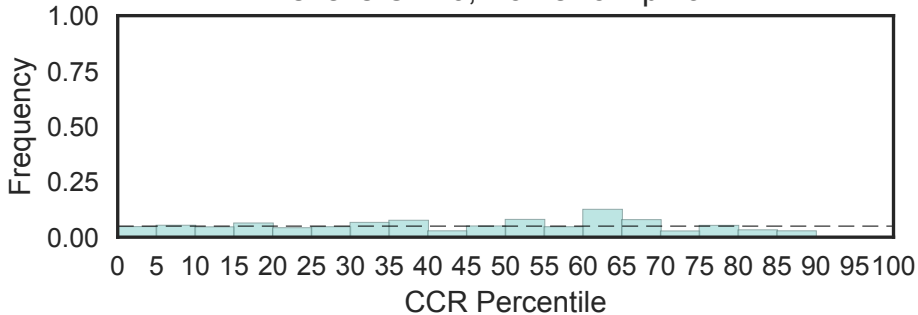

# Unstructured region on Calpain-3 (Calpain\_u2, N=1)

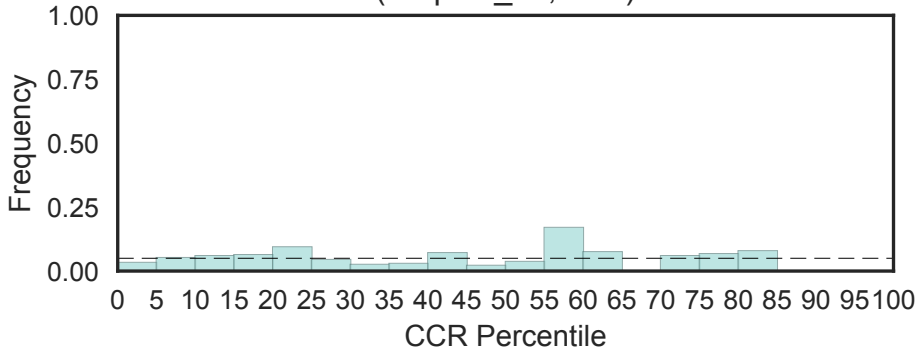

Calponin family repeat  
(Calponin, N=12)

Fisher's OR: 0.756; Bonferroni p-val: 1

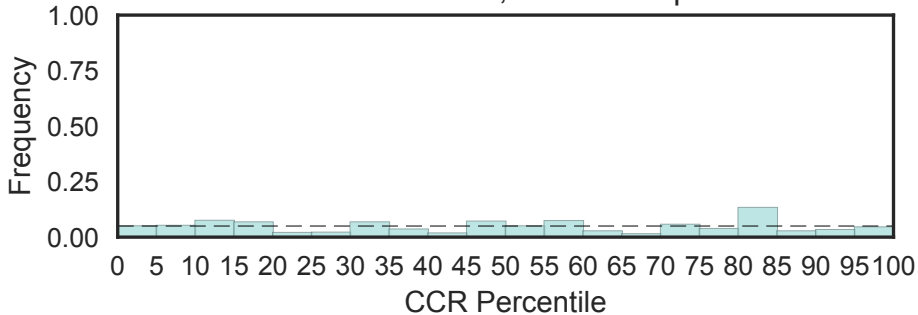

Calreticulin family  
(Calreticulin, N=6)

Fisher's OR: 0; Bonferroni p-val: 1

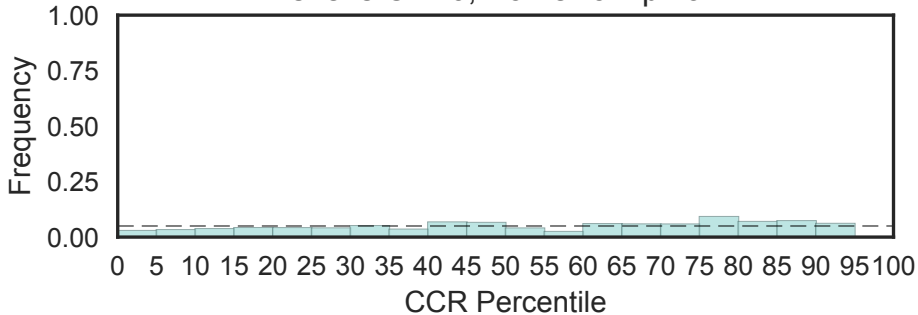

Calcineurin-binding protein (Calsarcin)  
(Calsarcin, N=3)

Fisher's OR: 0.299; Bonferroni p-val: 1

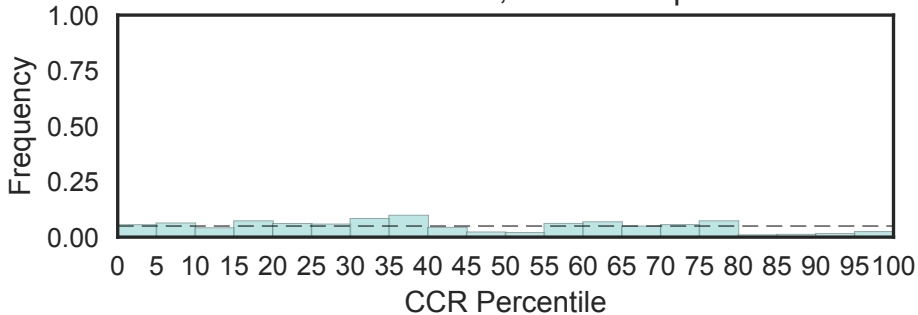



Calsequestrin  
(Calsequestrin, N=4)  
Fisher's OR: 0.269; Bonferroni p-val: 1

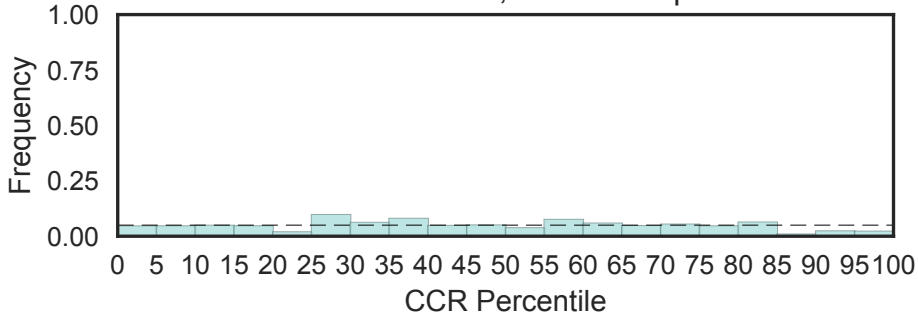

Calx-beta domain  
(Calx-beta, N=56)

Fisher's OR: 0.448; Bonferroni p-val: 1

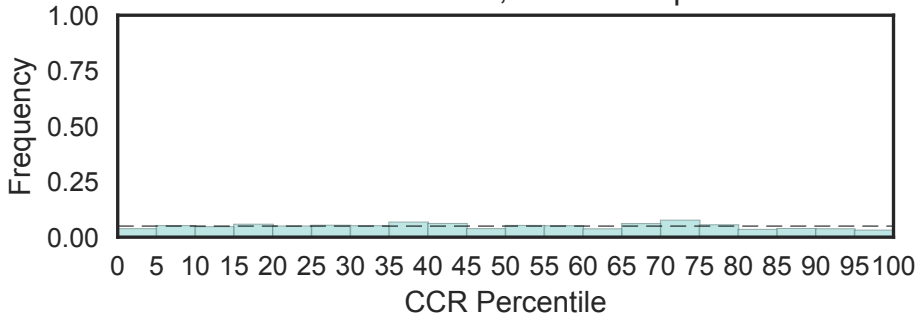

Cytoplasmic activation/proliferation-associated protein-1 C term  
(Caprin-1\_C, N=2)

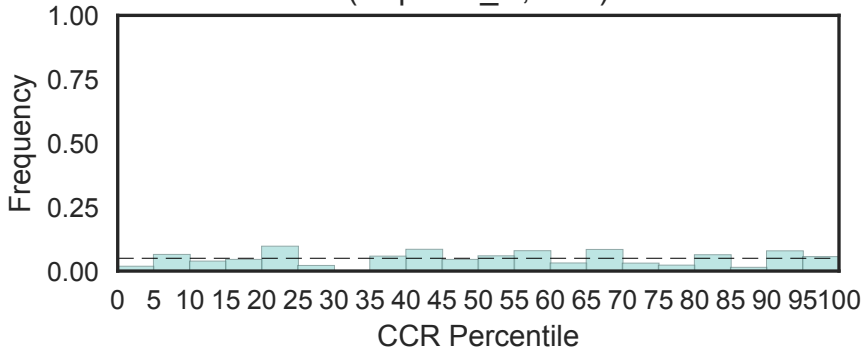

Eukaryotic-type carbonic anhydrase  
(Carb\_anhydrase, N=17)  
Fisher's OR: 0.284; Bonferroni p-val: 1

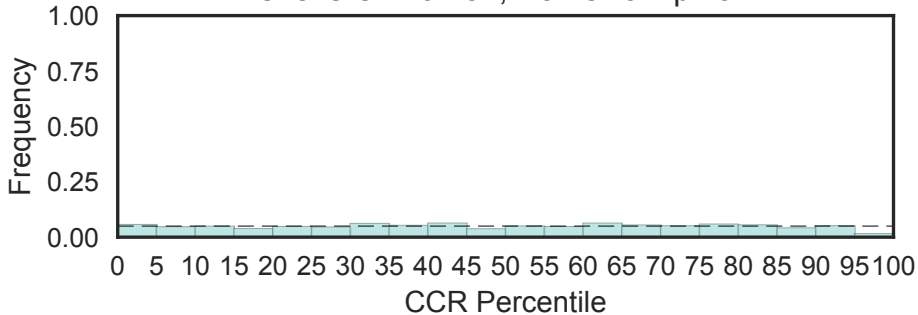

Carbohydrate kinase  
(Carb\_kinase, N=1)

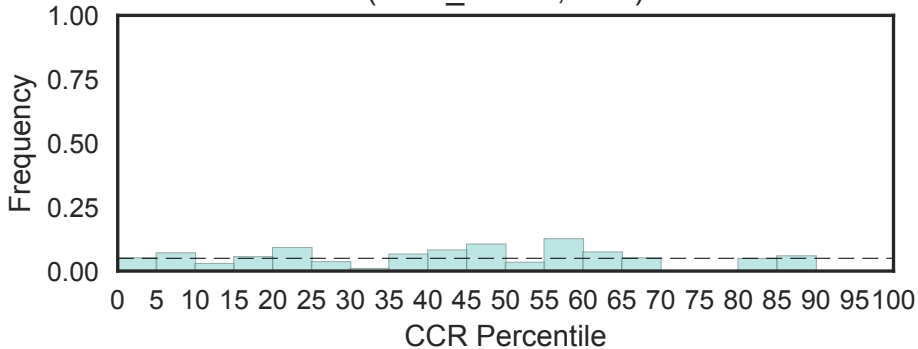

CarboxypepD\_reg-like domain  
(CarbopepD\_reg\_2, N=1)

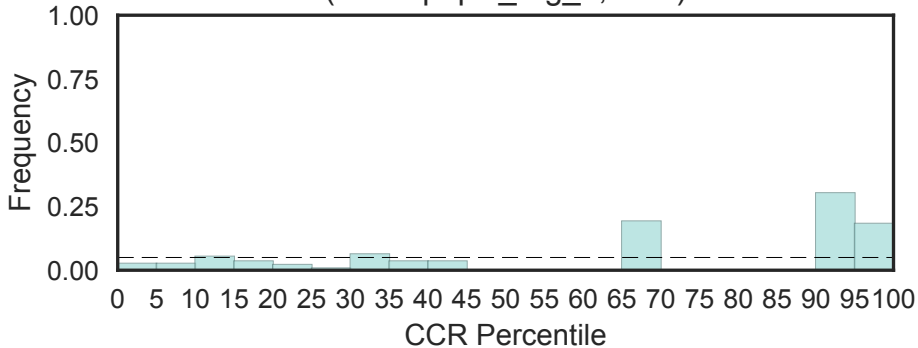

# Carboxyl transferase domain

(Carboxyl\_trans, N=4)

Fisher's OR: 0.783; Bonferroni p-val: 1

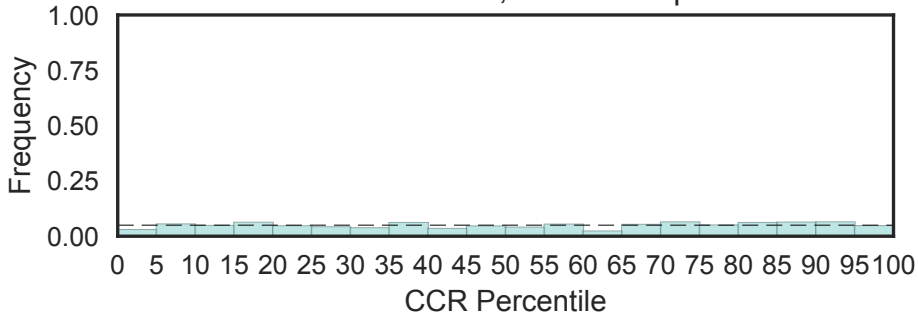

Carboxypeptidase regulatory-like domain  
(CarboxypepD\_reg, N=14)

Fisher's OR: 0.375; Bonferroni p-val: 1

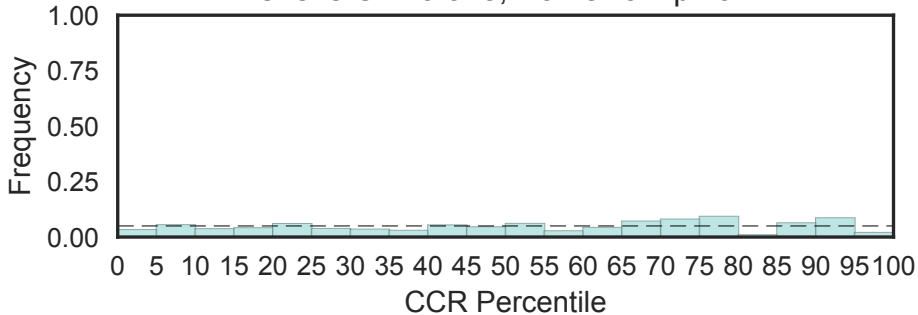



Choline/Carnitine o-acyltransferase  
(Carn\_acyltransf, N=8)  
Fisher's OR: 0.309; Bonferroni p-val: 1

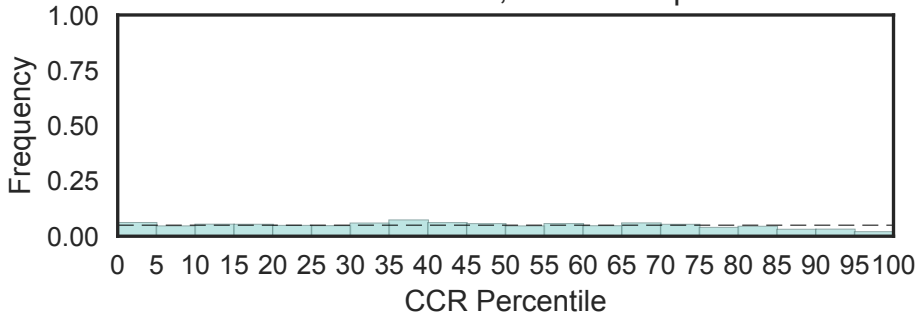

10 TM Acyl Transferase domain found in Cas1p  
(Cas1\_AcylT, N=1)

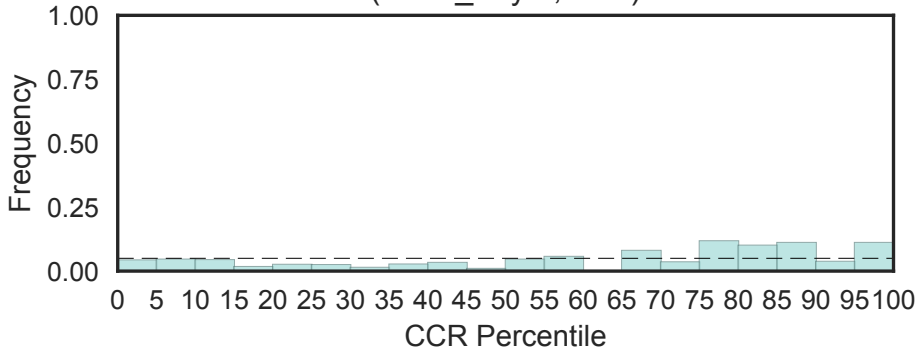

Cancer susceptibility candidate 1 N-terminus  
(Casc1\_N, N=1)

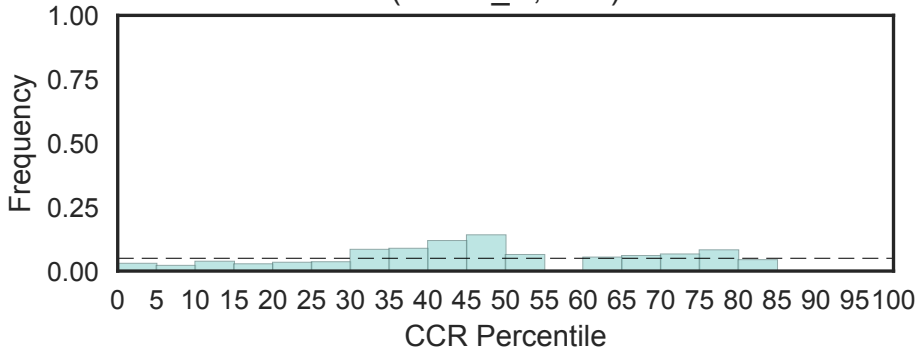

# Casein (Casein, N=1)

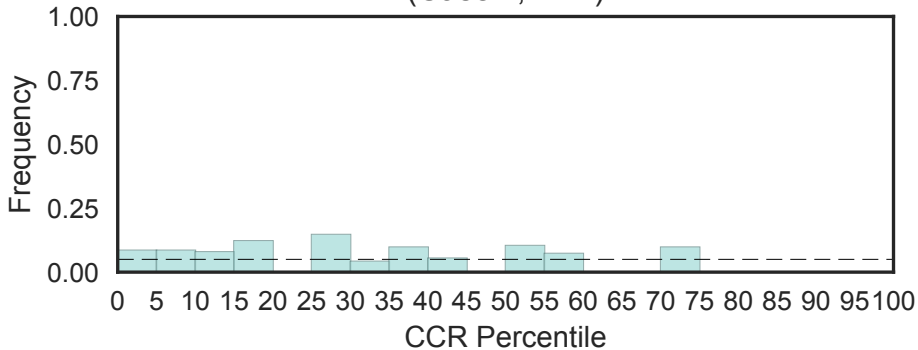

Kappa casein  
(Casein\_kappa, N=1)

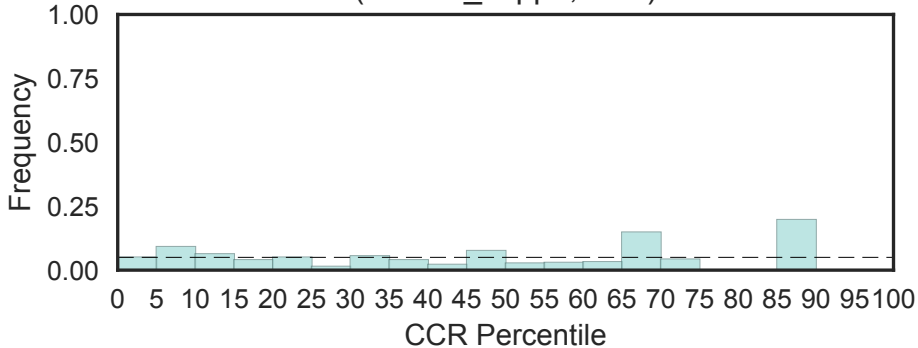

Proline rich region of Caskin proteins  
(Caskin-Pro-rich, N=2)

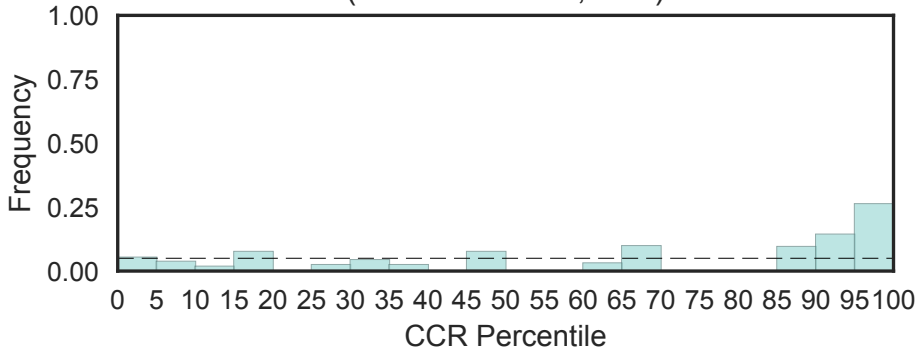

C-terminal region of Caskin  
(Caskin-tail, N=2)

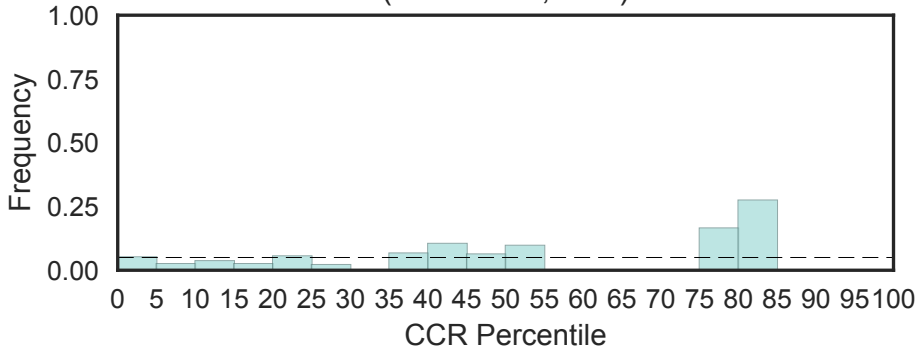

Caskin1 CASK-interaction domain  
(Caskin1-CID, N=1)

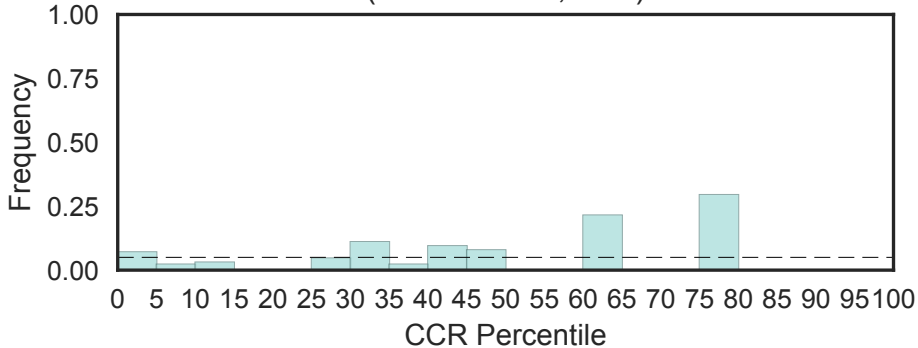



RIM-binding protein of the cytomatrix active zone  
(Cast, N=4)

Fisher's OR: 1.28; Bonferroni p-val: 1

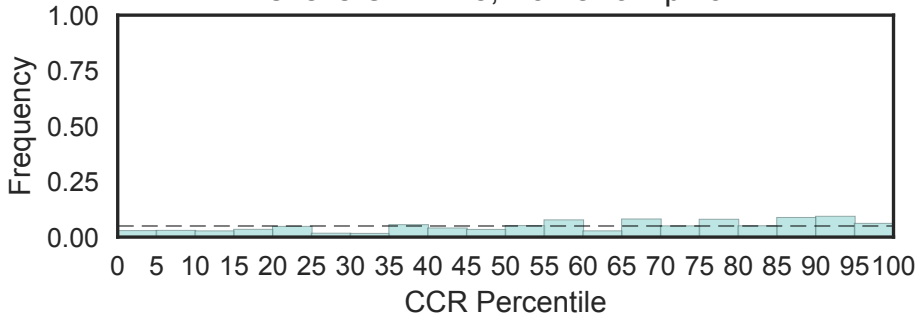

# Catalase (Catalase, N=1)

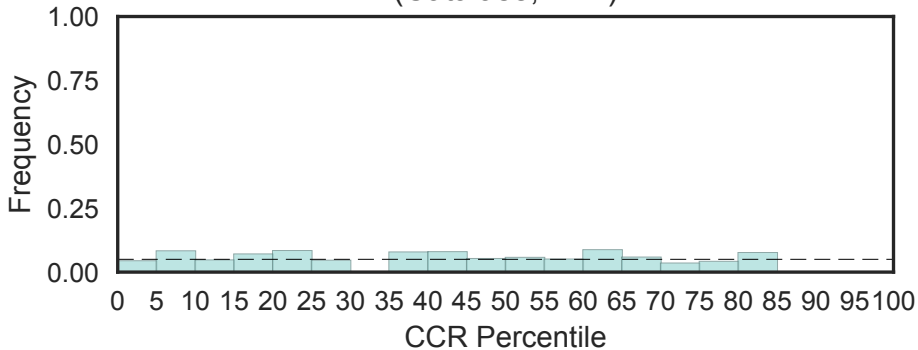

Catalase-related immune-responsive  
(Catalase-rel, N=1)

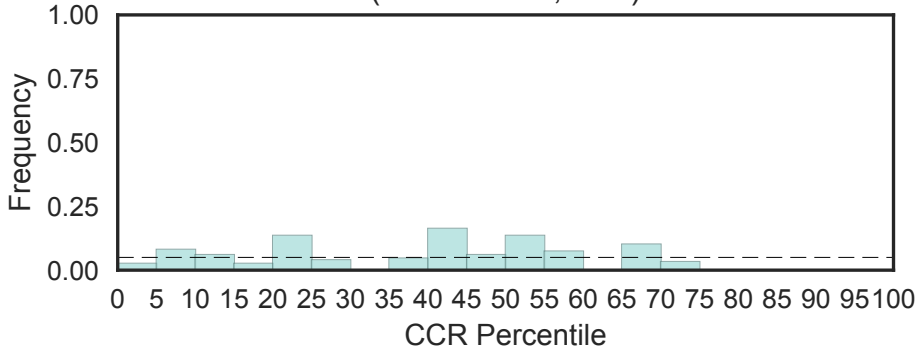

Cathelicidin  
(Cathelicidins, N=5)  
Fisher's OR: 0; Bonferroni p-val: 1

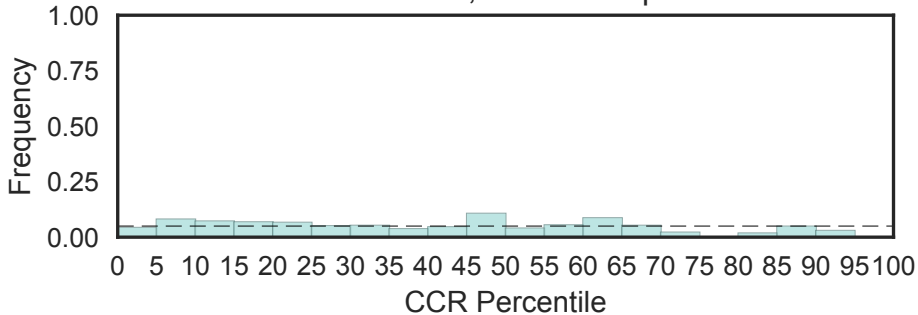

Cathepsin C exclusion domain  
(CathepsinC\_exc, N=1)

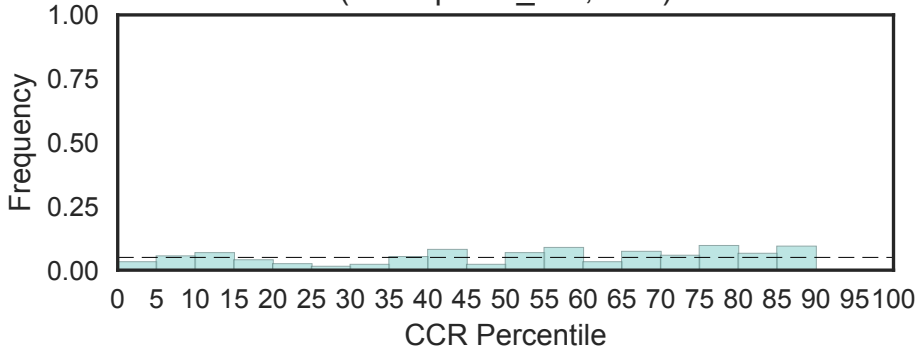

Cation transport ATPase (P-type)  
(Cation\_ATPase, N=30)  
Fisher's OR: 1.3; Bonferroni p-val: 1

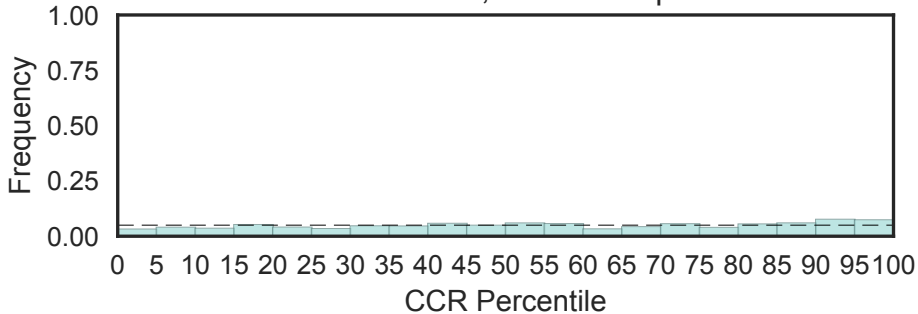

Cation transporting ATPase, C-terminus  
(Cation\_ATPase\_C, N=17)

Fisher's OR: 2.3; Bonferroni p-val: 1

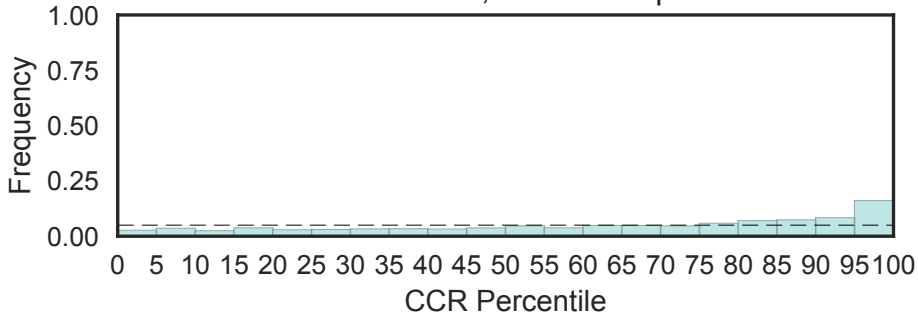

Cation transporter/ATPase, N-terminus  
(Cation\_ATPase\_N, N=17)

Fisher's OR: 1.83; Bonferroni p-val: 1

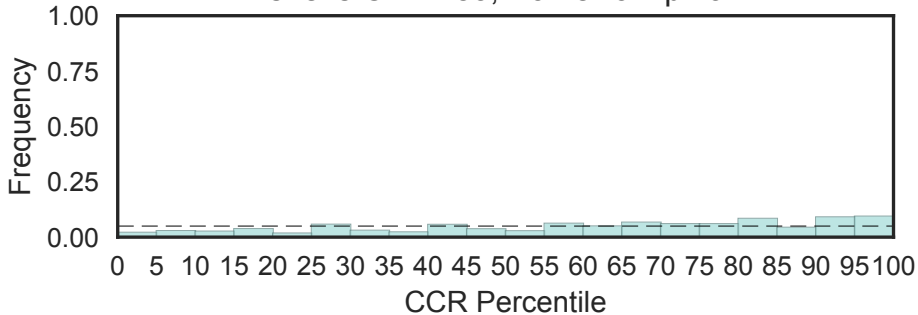



Cation efflux family  
(Cation\_efflux, N=10)

Fisher's OR: 0.554; Bonferroni p-val: 1

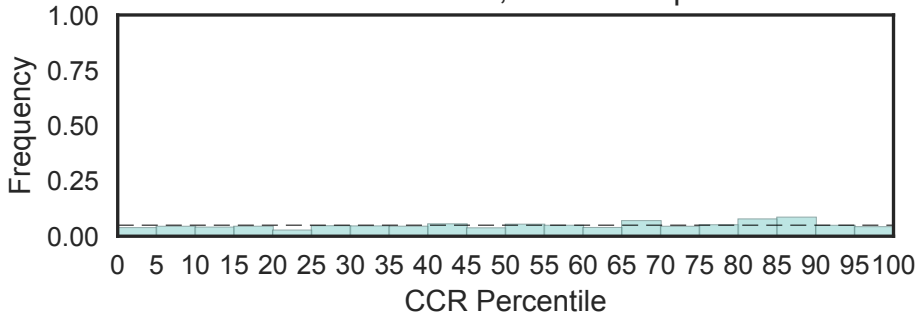

Caudal like protein activation region  
(Caudal\_act, N=2)

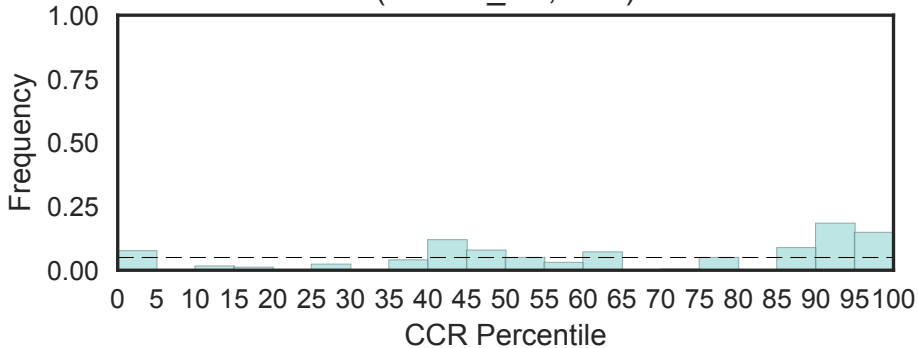

Caulimovirus viroplasm  
(Cauli\_VI, N=2)

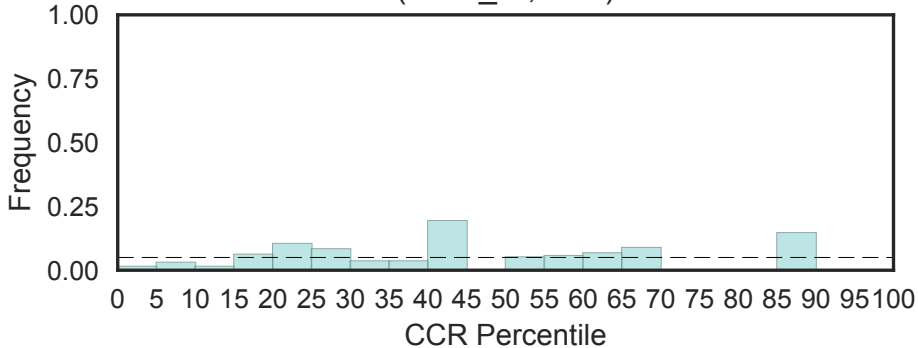

# Caveolin

(Caveolin, N=3)

Fisher's OR: 0; Bonferroni p-val: 1

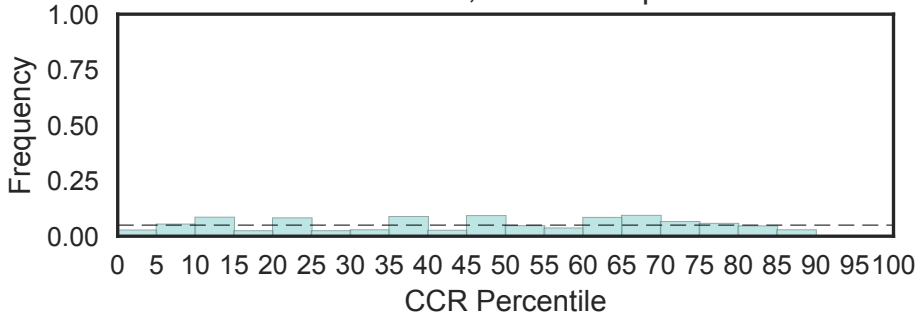

CobQ/CobB/MinD/ParA nucleotide binding domain  
(CbiA, N=4)

Fisher's OR: 1.58; Bonferroni p-val: 1

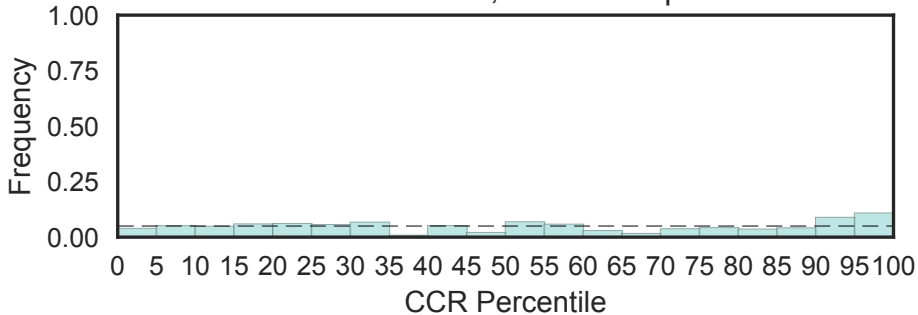

CBL proto-oncogene N-terminal domain 1  
(Cbl\_N, N=3)

Fisher's OR: 0.94; Bonferroni p-val: 1

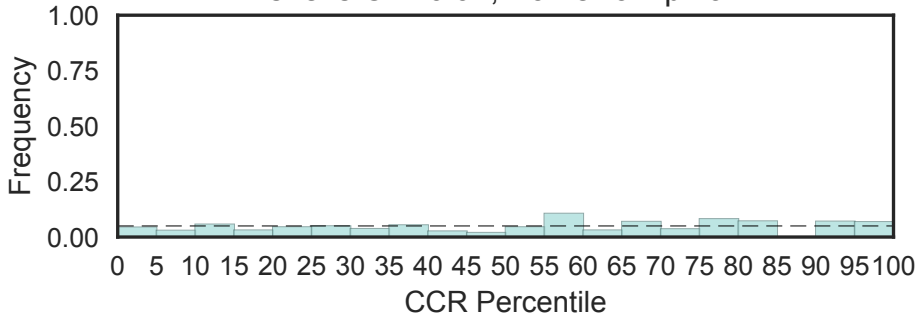

CBL proto-oncogene N-terminus, EF hand-like domain  
(Cbl\_N2, N=3)

Fisher's OR: 0; Bonferroni p-val: 1

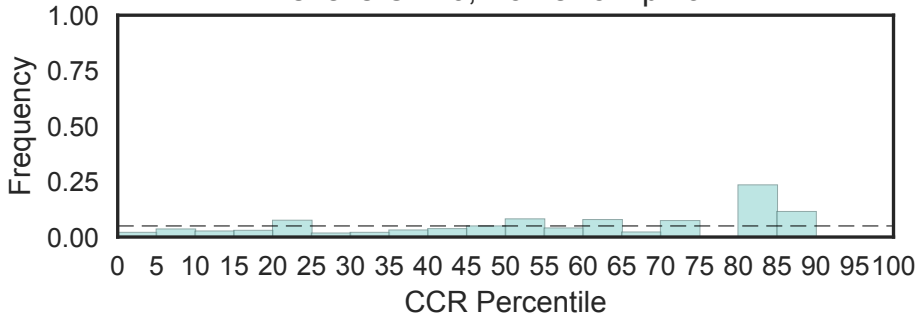

CBL proto-oncogene N-terminus, SH2-like domain  
(Cbl\_N3, N=3)

Fisher's OR: 3.09; Bonferroni p-val: 1

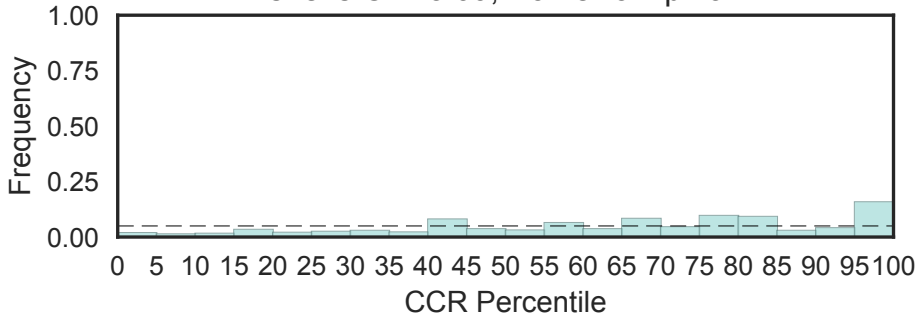



Coiled-coil domain-containing protein 124  
(Ccdc124, N=1)

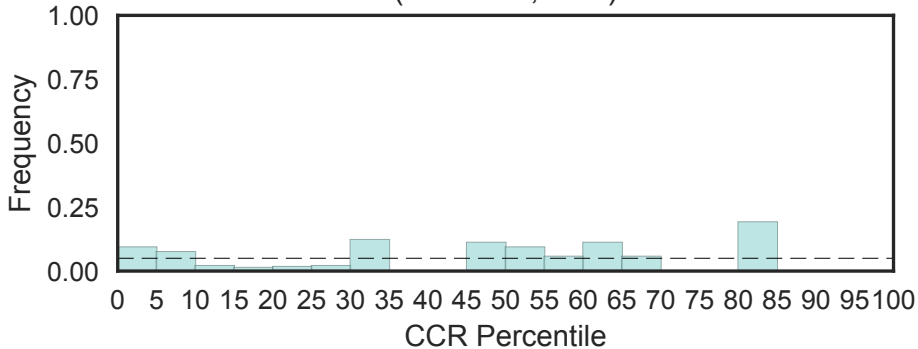

CDC6, C terminal winged helix domain  
(Cdc6\_C, N=2)

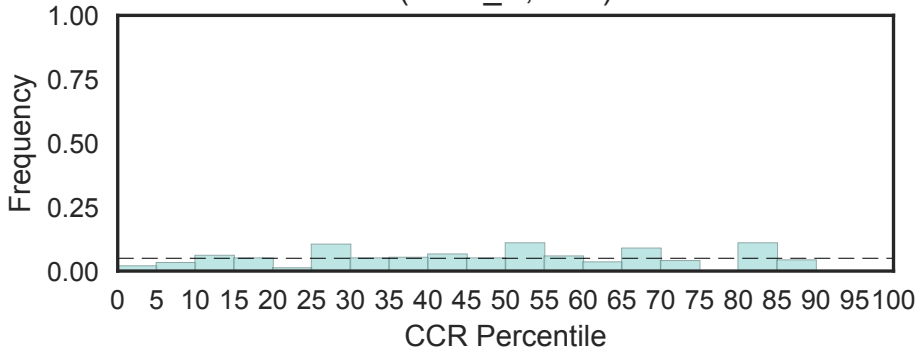

Pathogenicity locus  
(Cdd1, N=1)

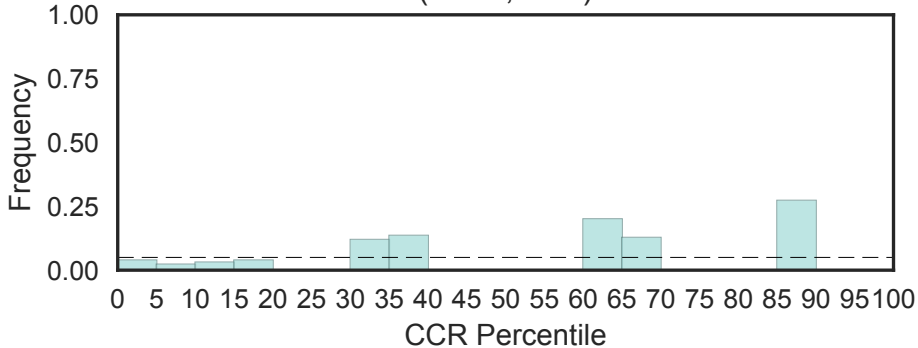

Trappin protein transglutaminase binding domain  
(Cementoin, N=2)

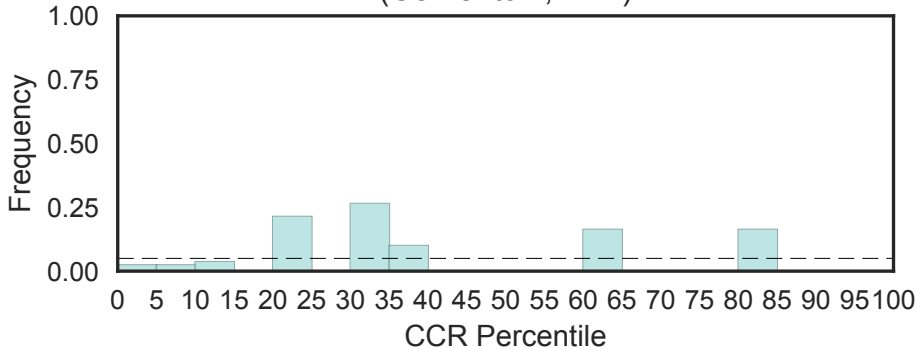

Centrosome localisation domain of Cep57  
(Cep57\_CLD, N=2)

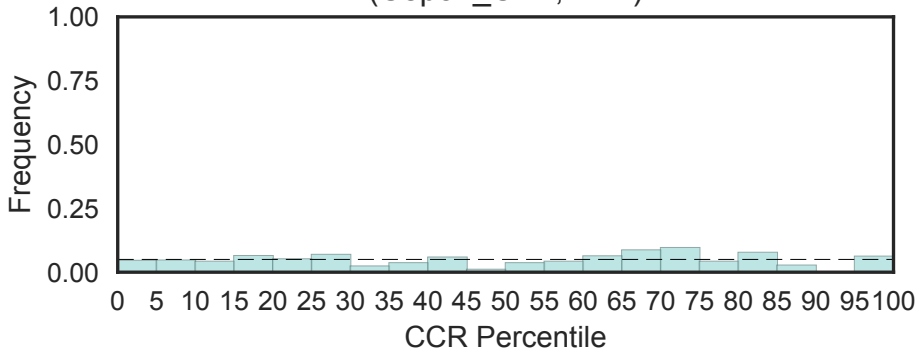

Centrosome microtubule-binding domain of Cep57  
(Cep57\_MT\_bd, N=2)

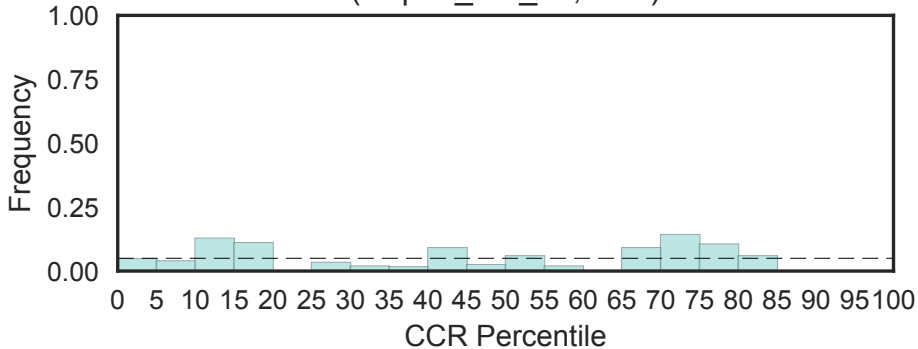

# Ceramidase

(Ceramidase, N=3)

Fisher's OR: 1.35; Bonferroni p-val: 1

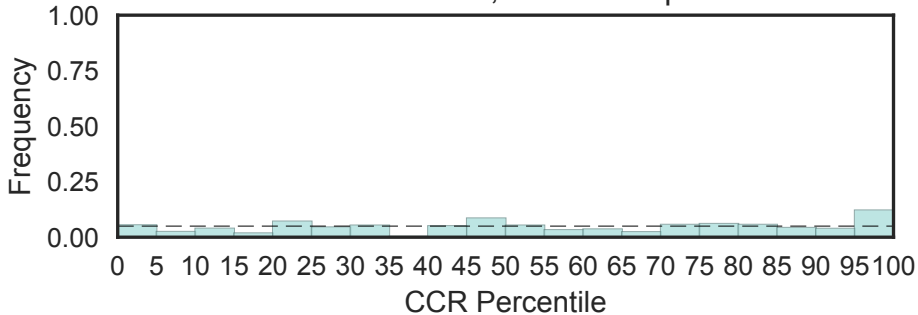

Neutral/alkaline non-lysosomal ceramidase, N-terminal  
(Ceramidase\_alk, N=1)

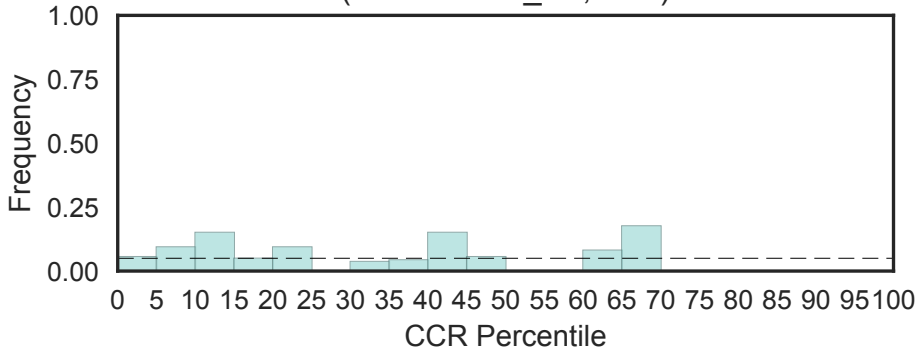



Uncharacterized conserved protein CG6151-P  
(Cg6151-P, N=1)

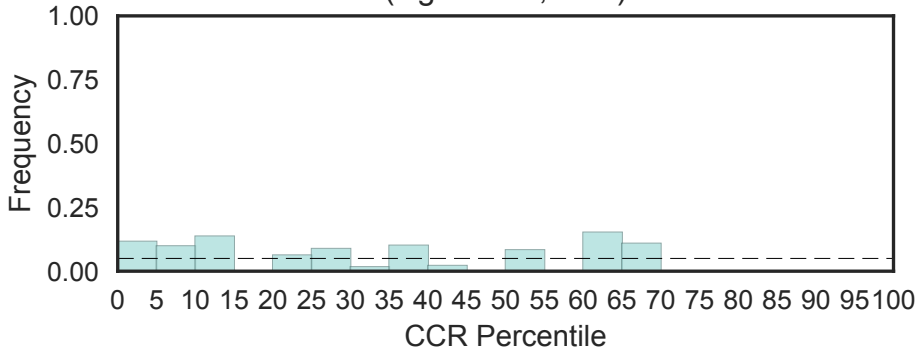

Cgr1 family  
(Cgr1, N=1)

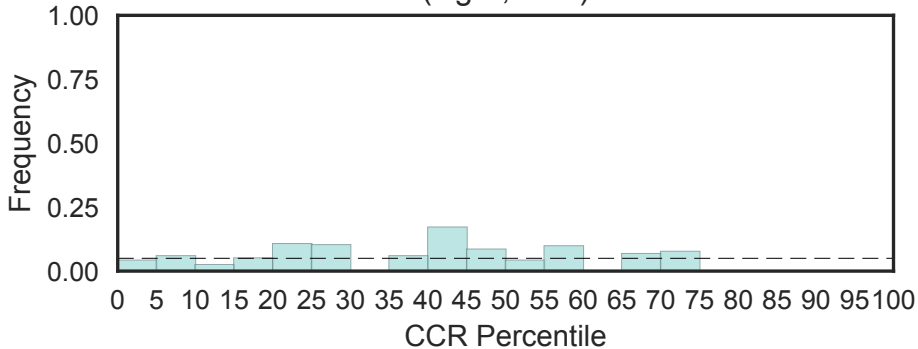

ChAPs (Chs5p-Arf1p-binding proteins)  
(ChAPs, N=1)

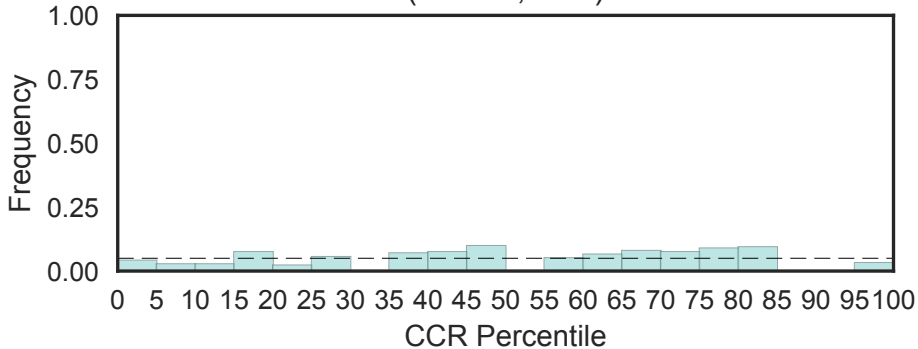

ChaC-like protein  
(ChaC, N=2)

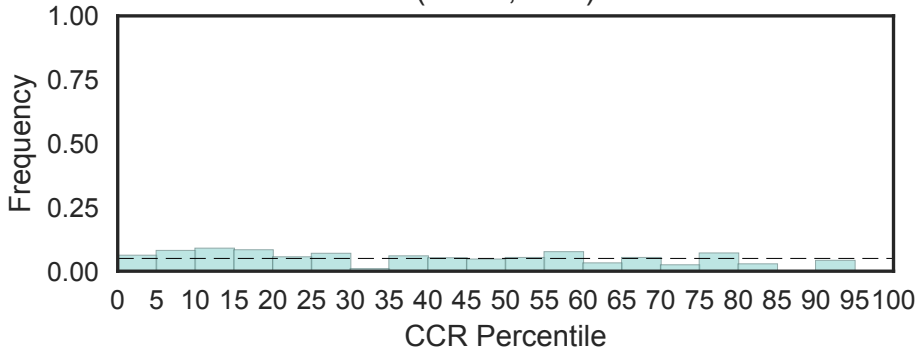

Chibby family  
(Chibby, N=3)

Fisher's OR: 0; Bonferroni p-val: 1

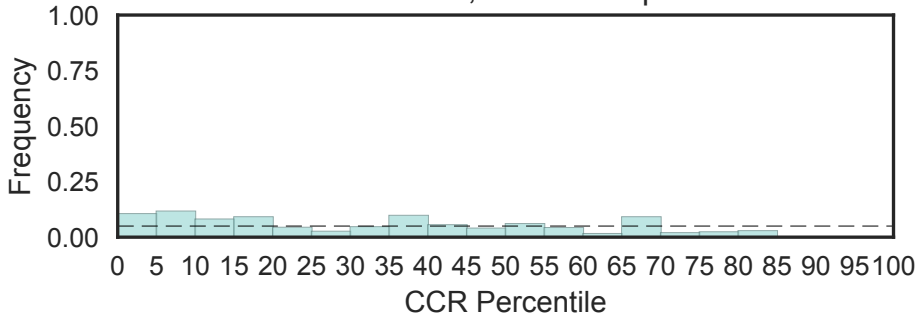

Chitin synthase  
(Chitin\_synth\_2, N=3)  
Fisher's OR: 5.07; Bonferroni p-val: 1

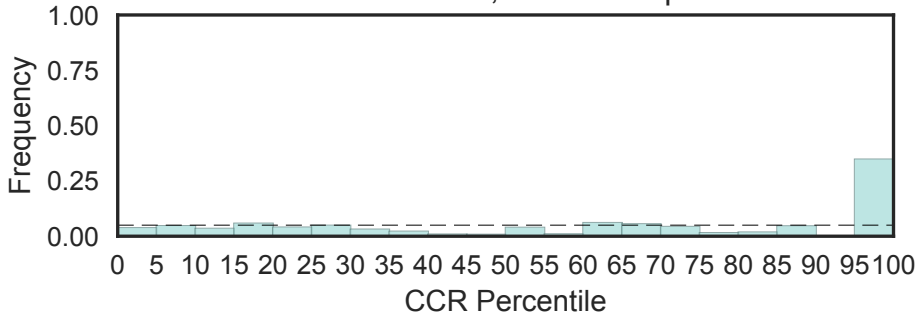

# Subunit ChII of Mg-chelatase (ChII, N=1)

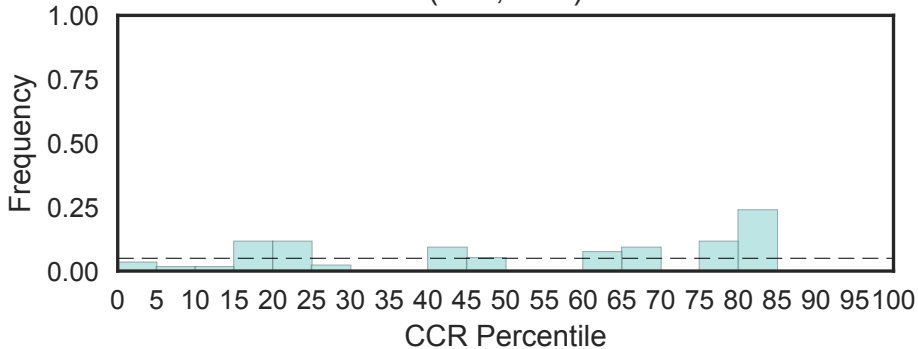

Chlorophyllase enzyme  
(Chlorophyllase2, N=2)

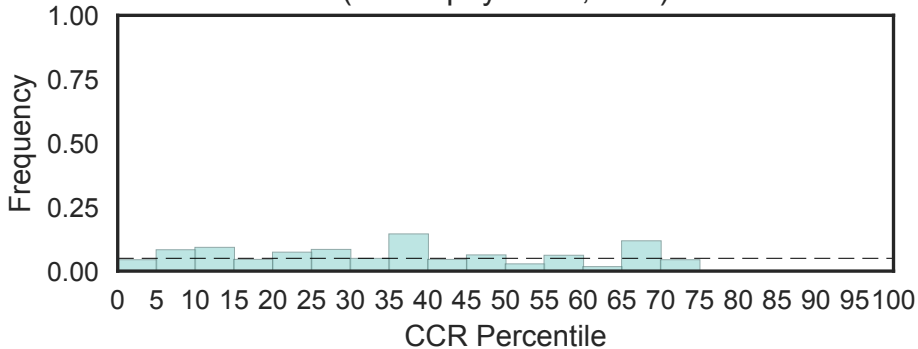



Cholecystokinin A receptor, N-terminal  
(CholecysA-Rec\_N, N=1)

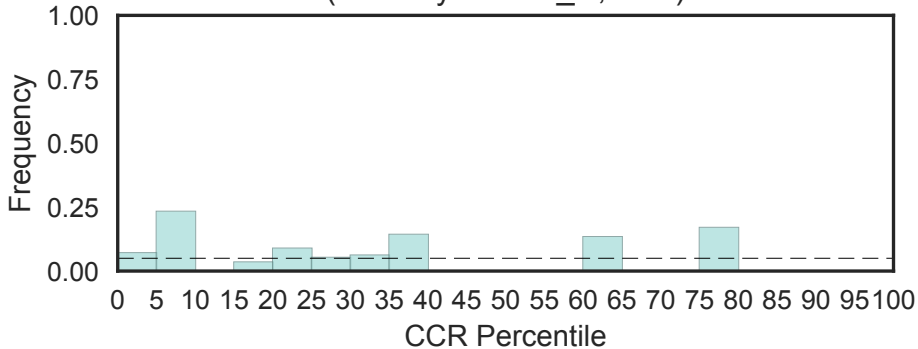

Choline/ethanolamine kinase  
(Choline\_kinase, N=4)  
Fisher's OR: 0.68; Bonferroni p-val: 1

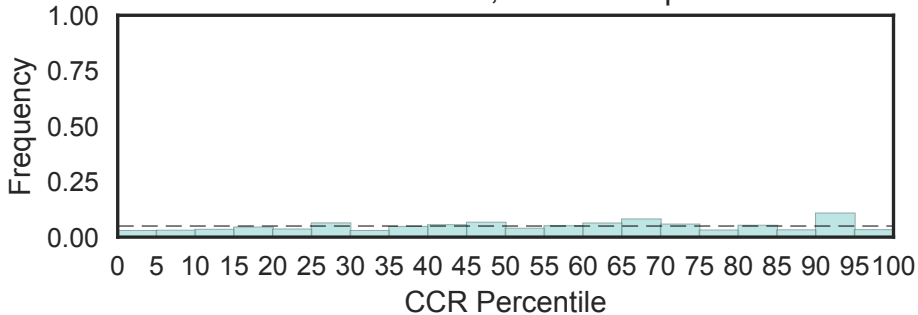

Plasma-membrane choline transporter  
(Choline\_transpo, N=6)  
Fisher's OR: 0.414; Bonferroni p-val: 1

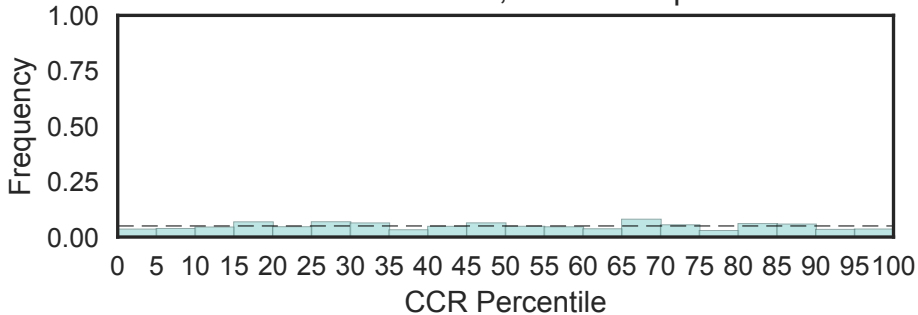

Chondroitin sulphate attachment domain  
(Chon\_Sulph\_att, N=1)

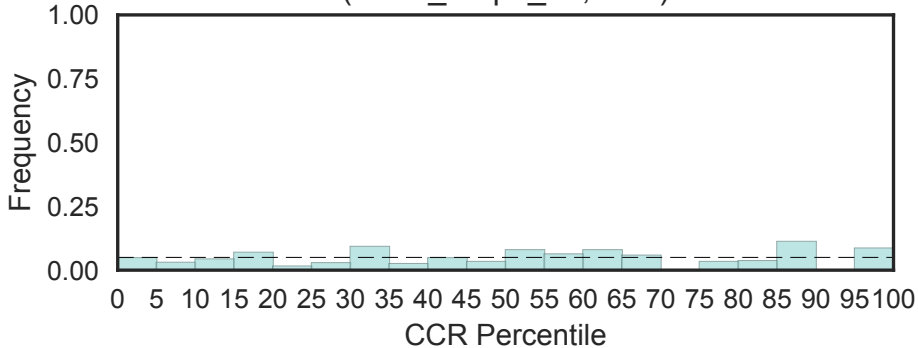

N-terminal region of Chorein or VPS13  
(Chorein\_N, N=8)

Fisher's OR: 0.795; Bonferroni p-val: 1

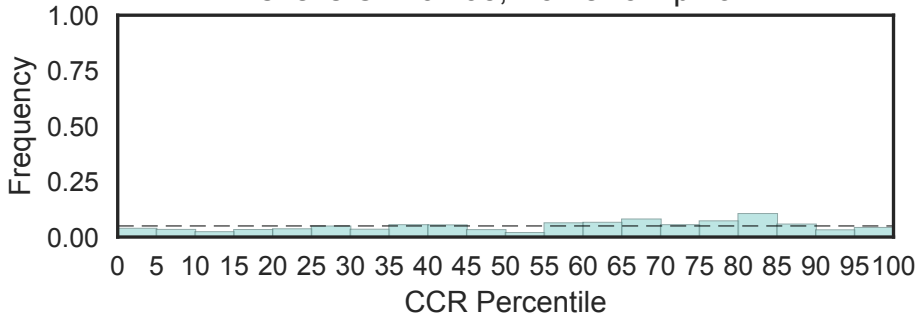

Chromo (CHRromatin Organisation MOdifier) domain  
(Chromo, N=27)

Fisher's OR: 11; Bonferroni p-val: 2.69e-14

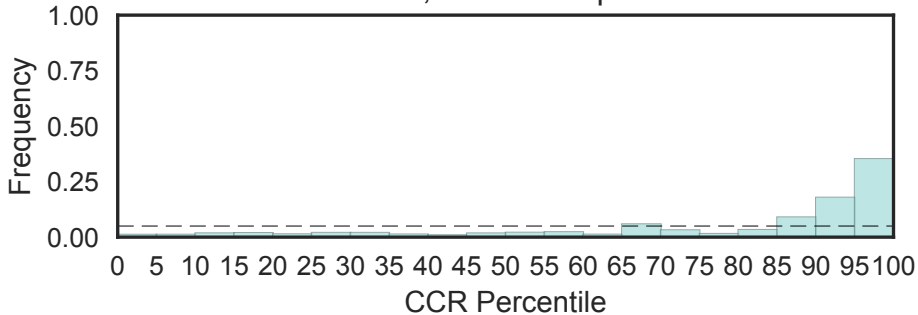

Chromo shadow domain  
(Chromo\_shadow, N=3)

Fisher's OR: 54.1; Bonferroni p-val: 0.376

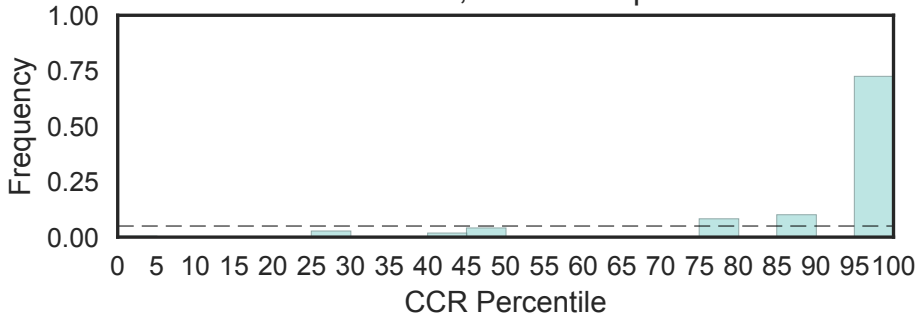

# Chromosome segregation during meiosis (Chromosome\_seg, N=2)

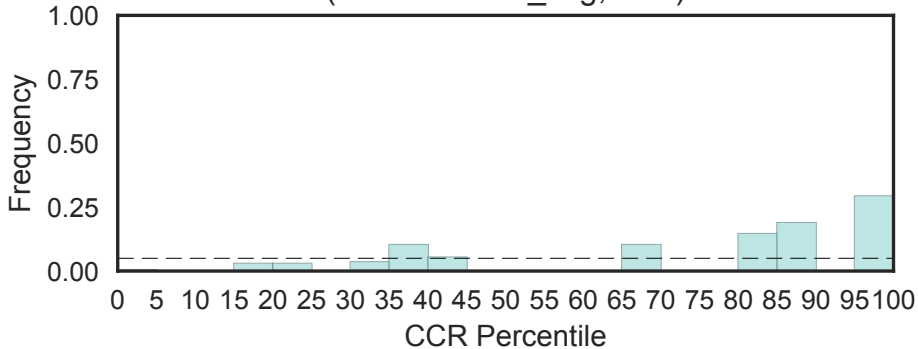



Churchill protein  
(Churchill, N=5)

Fisher's OR: 0; Bonferroni p-val: 1

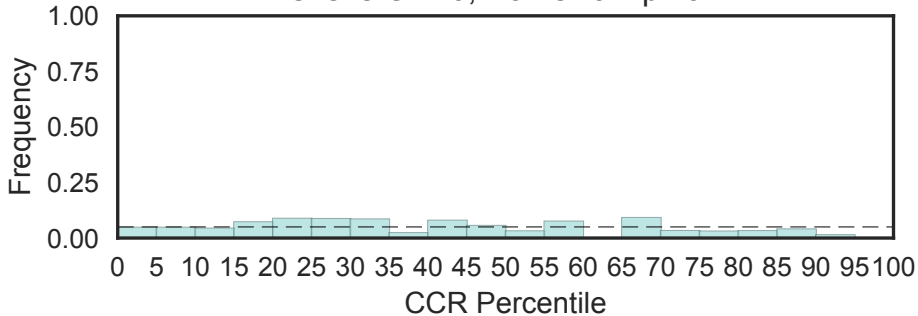

# Clock interacting protein circadian (CiPC, N=1)

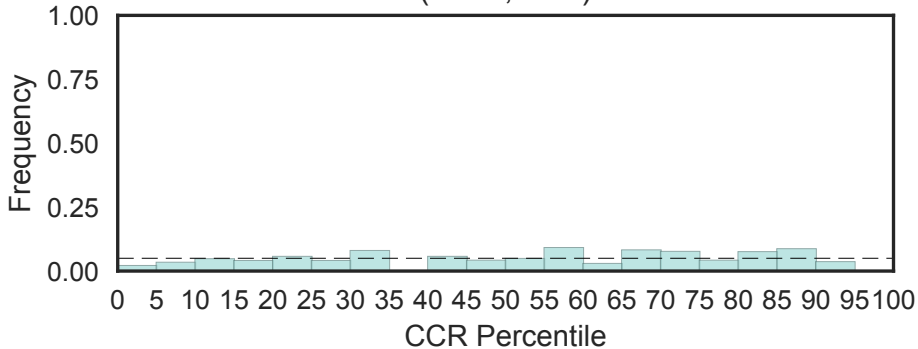

# Circadian-associated transcriptional repressor (Ciart, N=1)

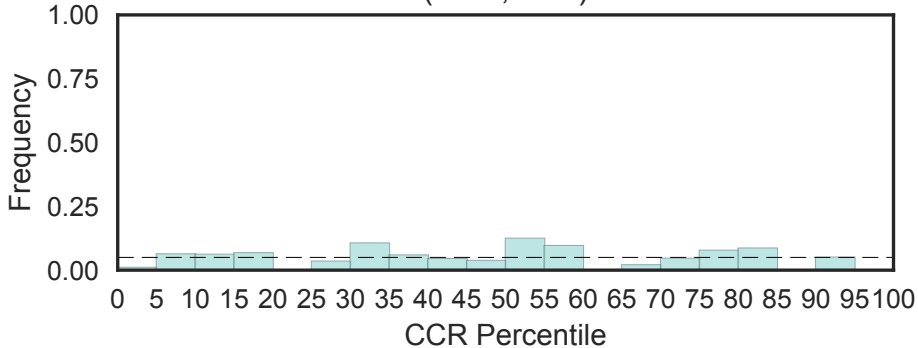

# Caffeine-induced death protein 2 (Cid2, N=1)

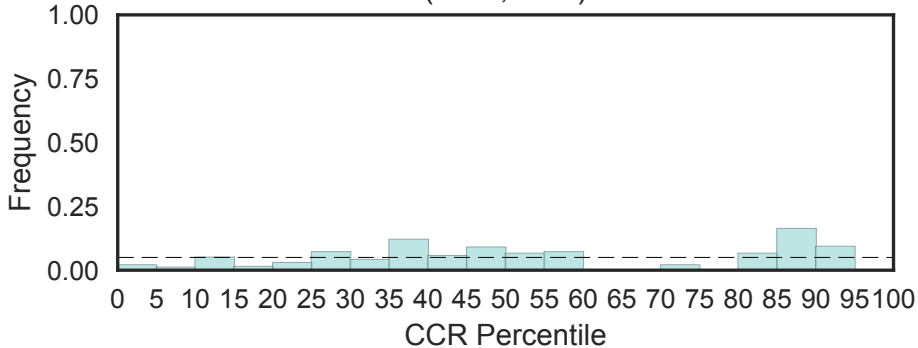

N-terminal domain of CBF1 interacting co-repressor CIR  
(Cir\_N, N=3)

Fisher's OR: 4.5; Bonferroni p-val: 1

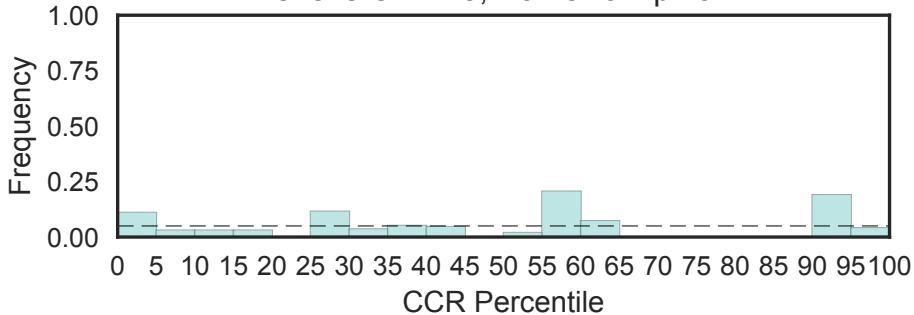

Citrate transporter  
(CitMHS, N=11)

Fisher's OR: 0.305; Bonferroni p-val: 1

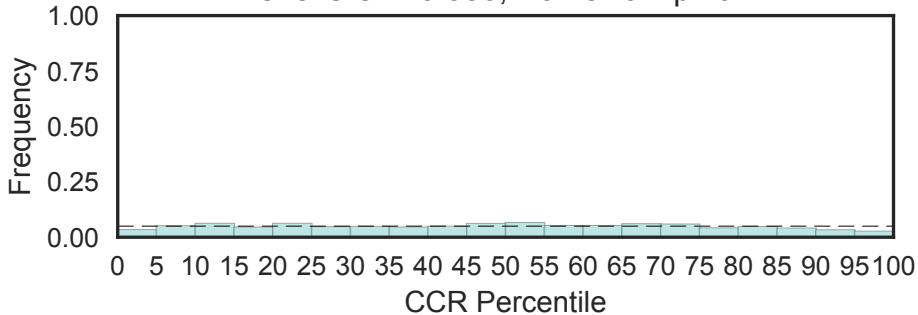

ATP citrate lyase citrate-binding  
(Citrate\_bind, N=1)

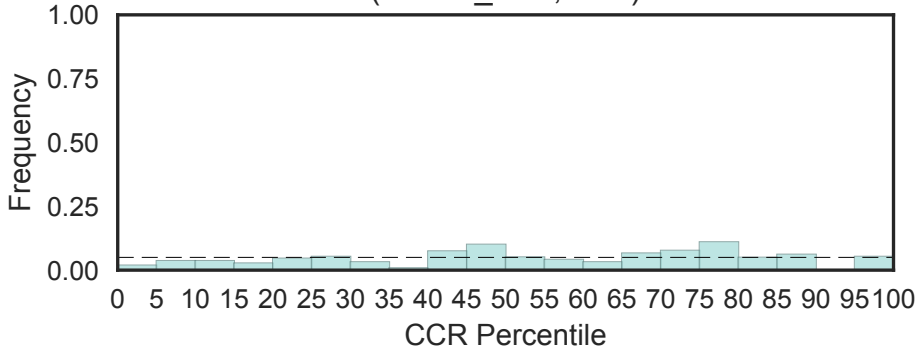

Citrate synthase, C-terminal domain  
(Citrate\_synt, N=2)

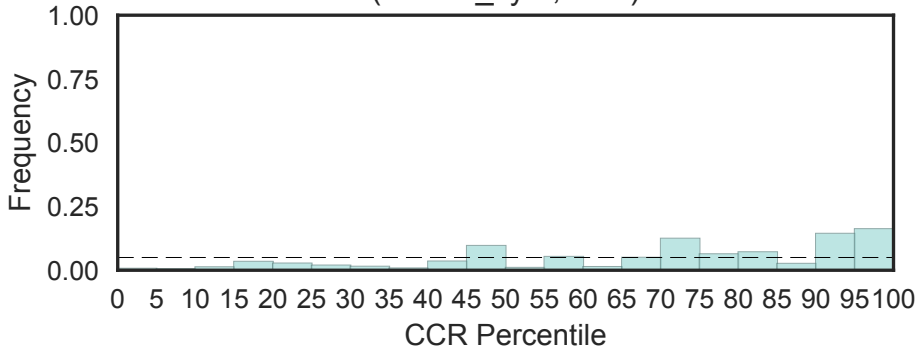



Clathrin adaptor complex small chain  
(Clat\_adaptor\_s, N=17)

Fisher's OR: 1.68; Bonferroni p-val: 1

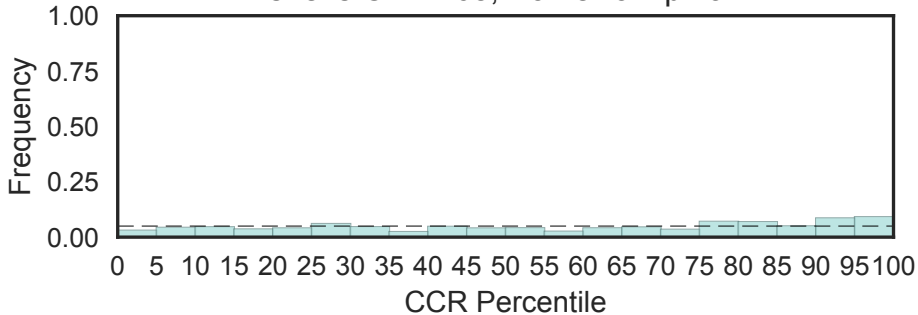

Region in Clathrin and VPS  
(Clathrin, N=18)

Fisher's OR: 4.09; Bonferroni p-val: 6.94e-05

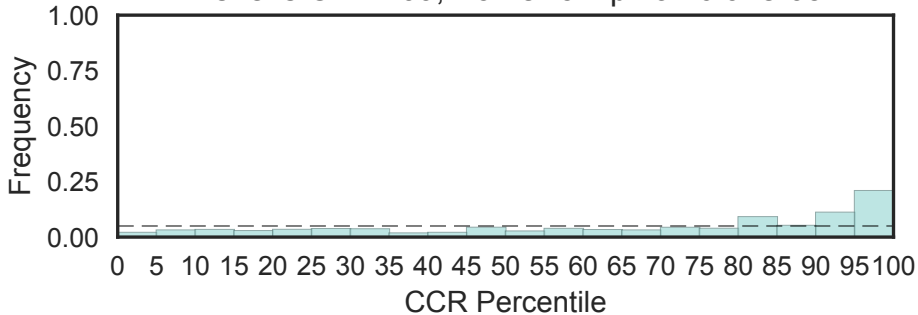

Clathrin, heavy-chain linker  
(Clathrin-link, N=2)

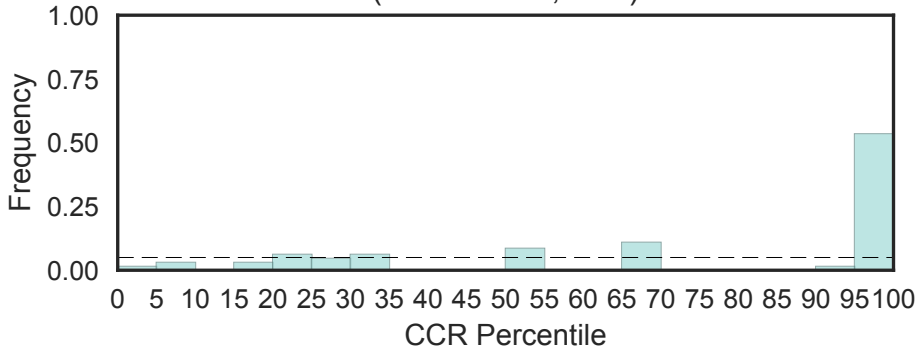

Clathrin-H-link  
(Clathrin\_H\_link, N=3)  
Fisher's OR: 1.64; Bonferroni p-val: 1

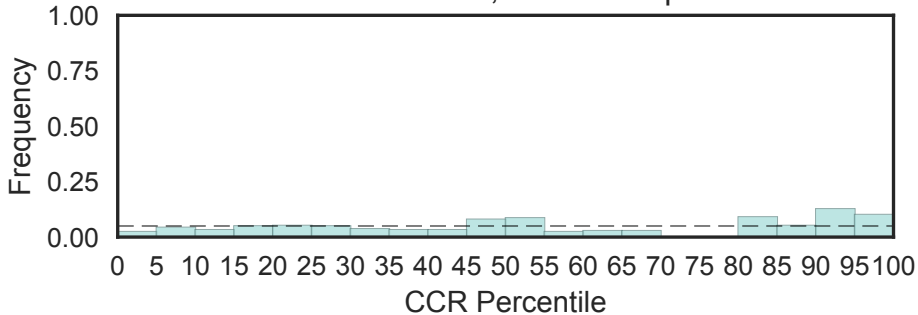

Clathrin-binding box of Aftiphilin, vesicle trafficking  
(Clathrin\_bdg, N=2)

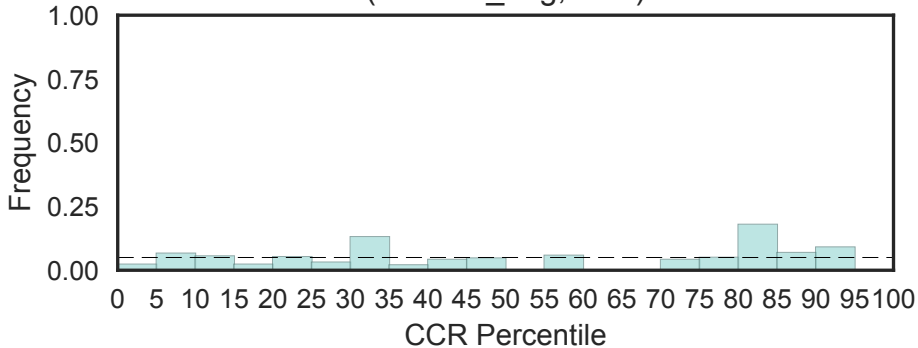

Clathrin light chain  
(Clathrin\_lg\_ch, N=3)

Fisher's OR: 0.707; Bonferroni p-val: 1

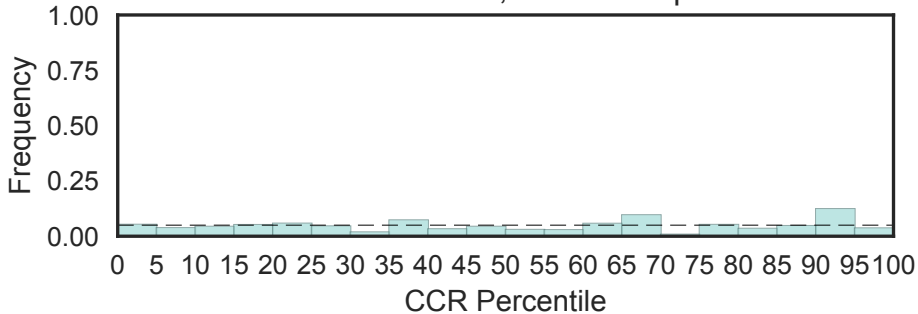

Clathrin propeller repeat  
(Clathrin\_propel, N=9)

Fisher's OR: 6.29; Bonferroni p-val: 1

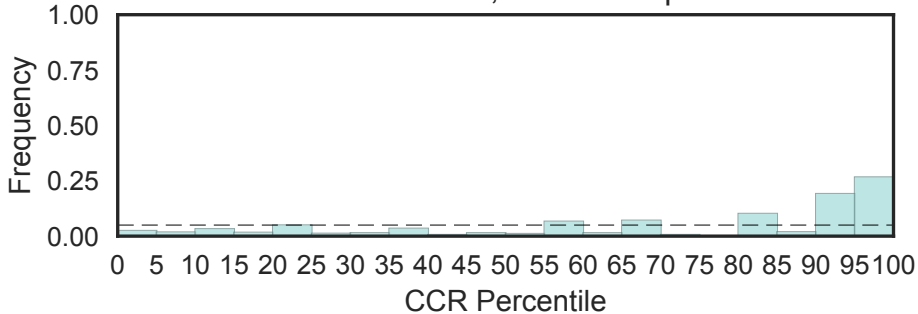

PMP-22/EMP/MP20/Claudin tight junction  
(Claudin\_2, N=31)

Fisher's OR: 0.661; Bonferroni p-val: 1

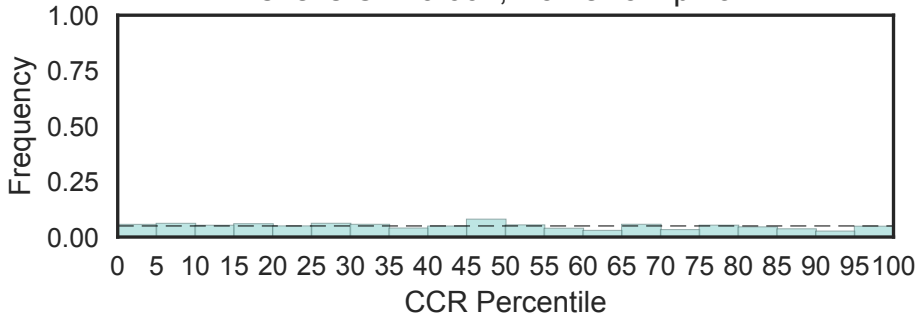



Pre-mRNA cleavage complex II protein Clp1  
(Clp1, N=1)

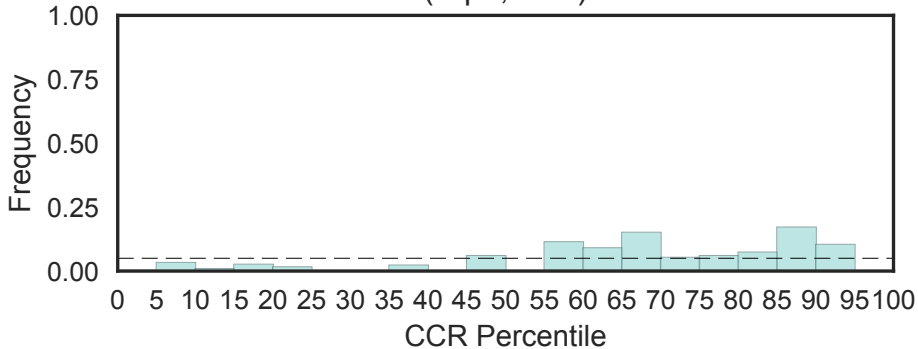

C-terminal, D2-small domain, of ClpB protein  
(ClpB\_D2-small, N=2)

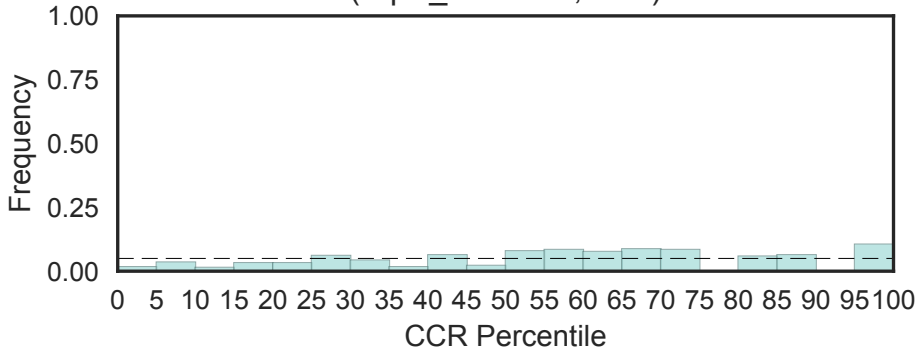

ATP-dependent Clp protease adaptor protein ClpS  
(ClpS, N=2)

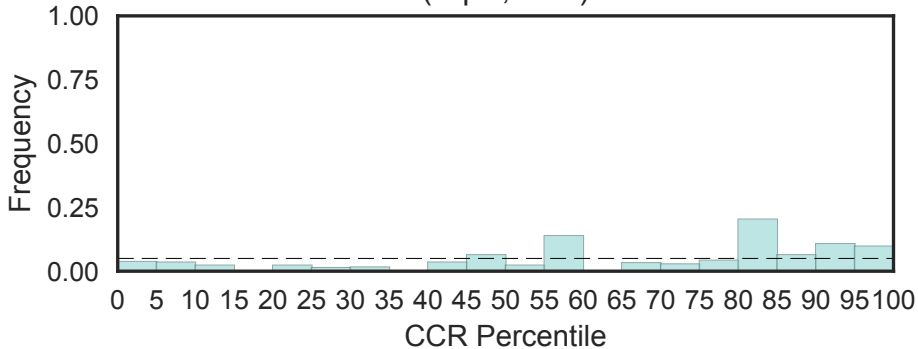

Clp amino terminal domain, pathogenicity island component  
(Clp\_N, N=3)

Fisher's OR: 13.5; Bonferroni p-val: 1

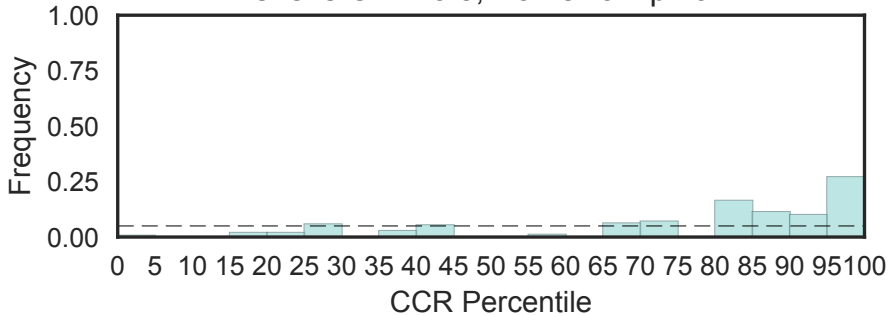

Clusterin-associated protein-1  
(Cluap1, N=1)

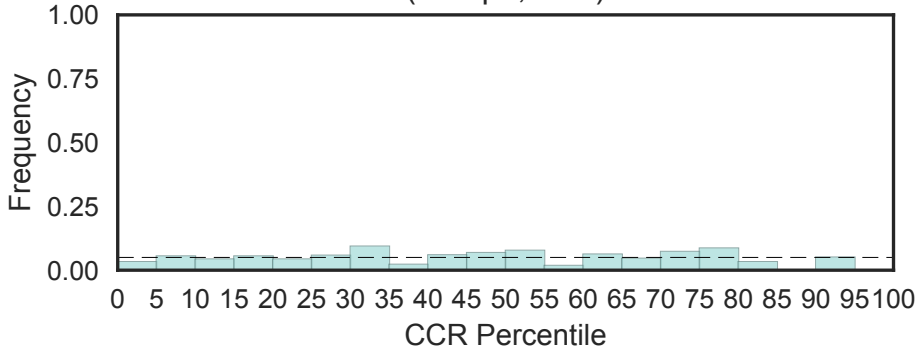

# Clusterin (Clusterin, N=2)

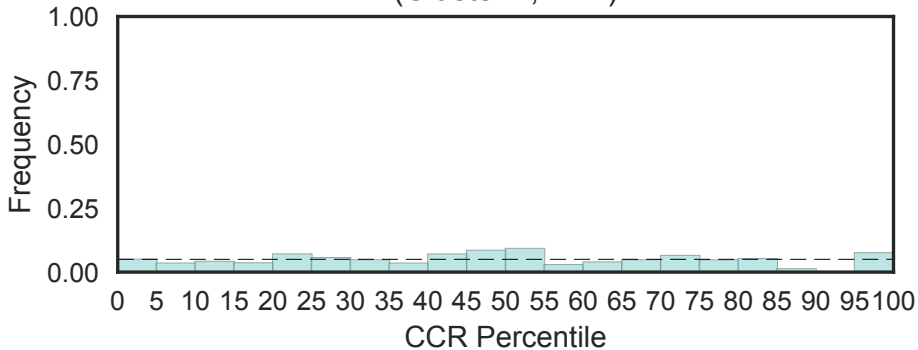

Cytochrome c oxidase biogenesis protein Cmc1 like  
(Cmc1, N=3)

Fisher's OR: 0; Bonferroni p-val: 1

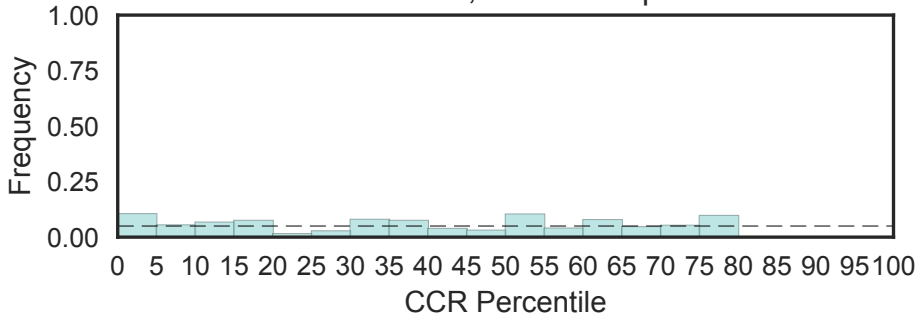

C-myb, C-terminal  
(Cmyb\_C, N=3)

Fisher's OR: 2.24; Bonferroni p-val: 1

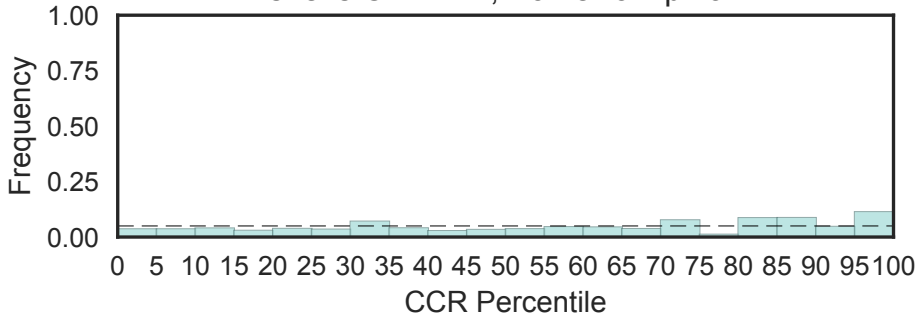



non-SMC mitotic condensation complex subunit 1  
(Cnd1, N=12)

Fisher's OR: 1.78; Bonferroni p-val: 1

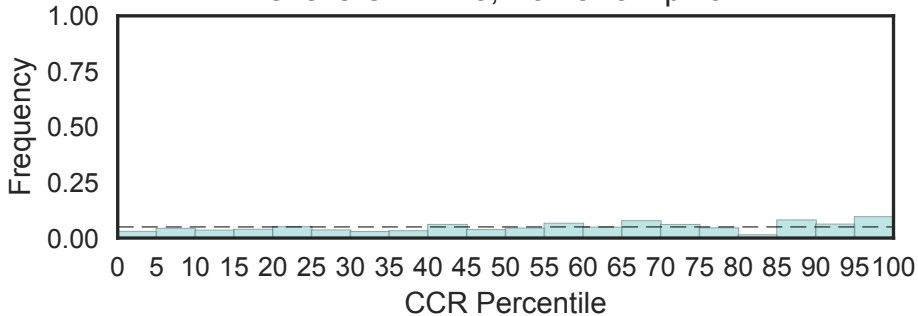

non-SMC mitotic condensation complex subunit 1, N-term  
(Cnd1\_N, N=1)

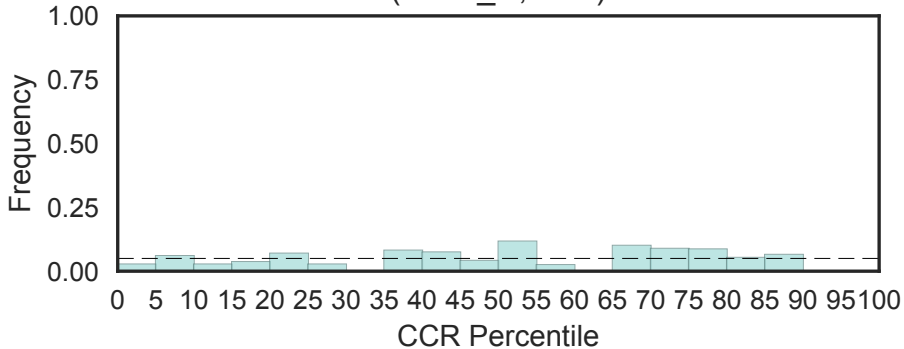

Condensin complex subunit 2  
(Cnd2, N=1)

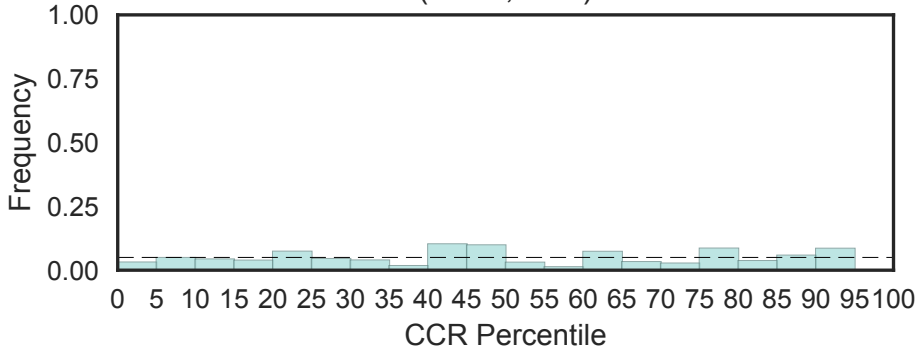

# Nuclear condensating complex subunits, C-term domain (Cnd3, N=1)

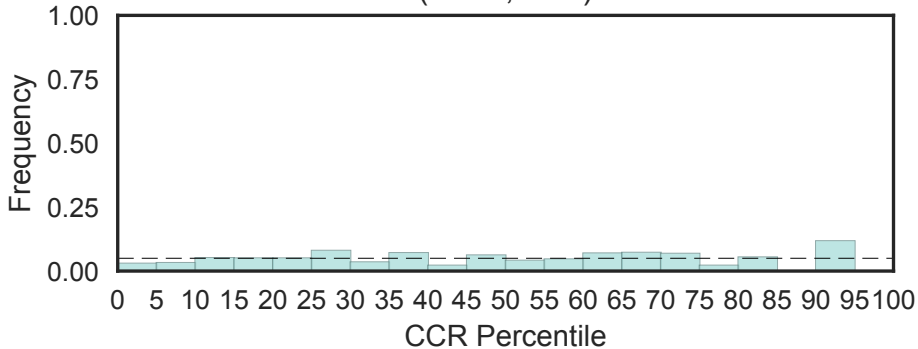

# Centrosomin N-terminal motif 1

(Cnn\_1N, N=4)

Fisher's OR: 0; Bonferroni p-val: 1

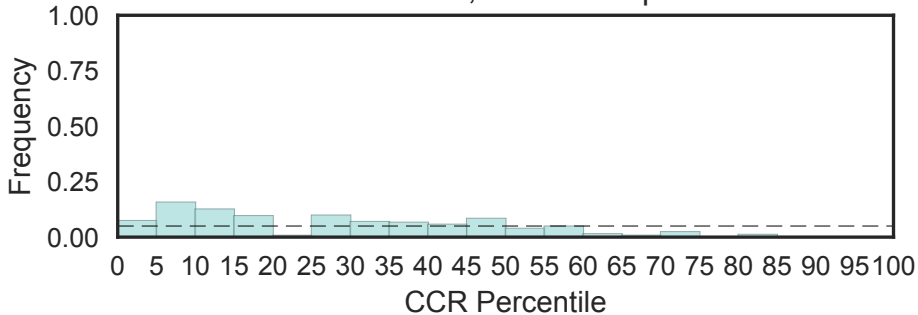

CoA binding domain  
(CoA\_binding, N=2)

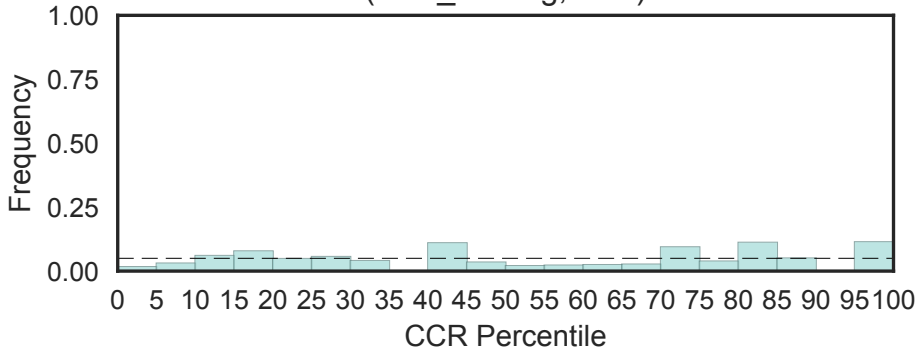

CoA binding domain  
(CoA\_binding\_2, N=1)

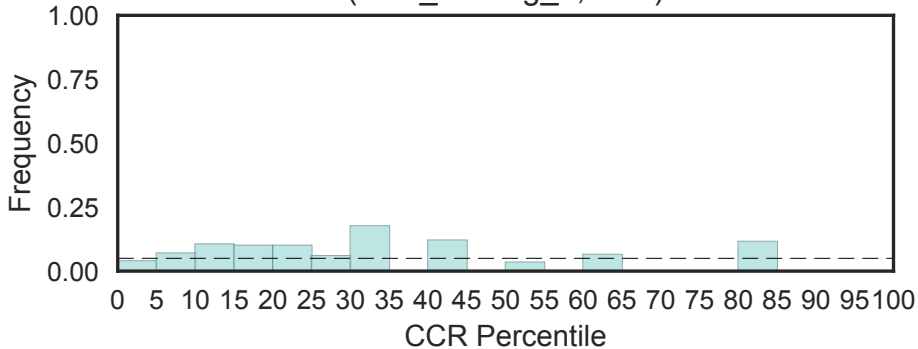

Coenzyme A transferase  
(CoA\_trans, N=4)

Fisher's OR: 4.24; Bonferroni p-val: 1

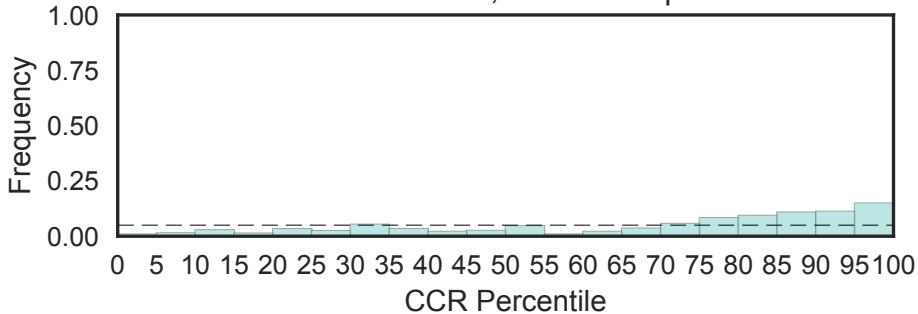



CoA-transferase family III  
(CoA\_transf\_3, N=2)

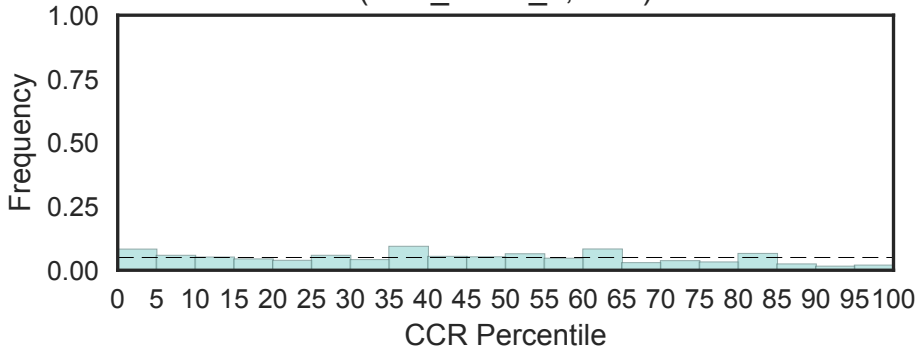

# Cytochrome oxidase complex assembly protein 1 (Coa1, N=2)

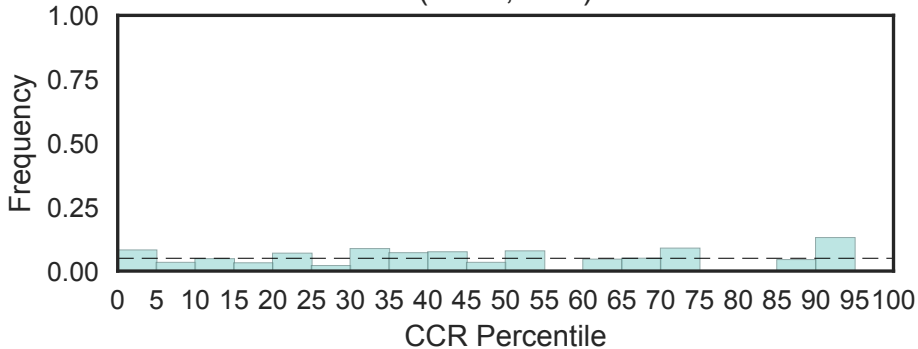

Dephospho-CoA kinase  
(CoaE, N=4)

Fisher's OR: 0.778; Bonferroni p-val: 1

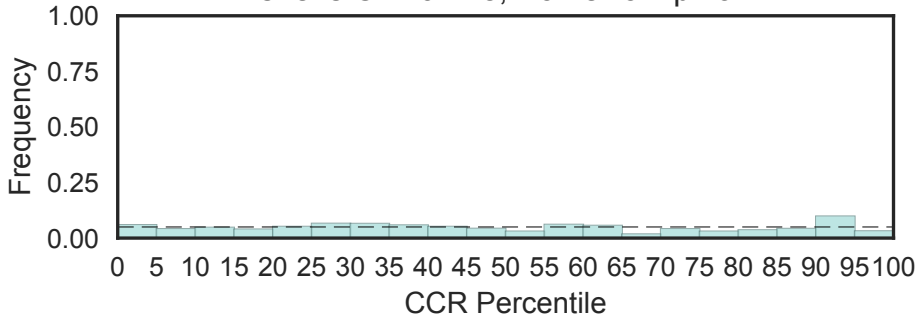

Coatamer beta C-terminal region  
(Coatamer\_beta\_C, N=1)

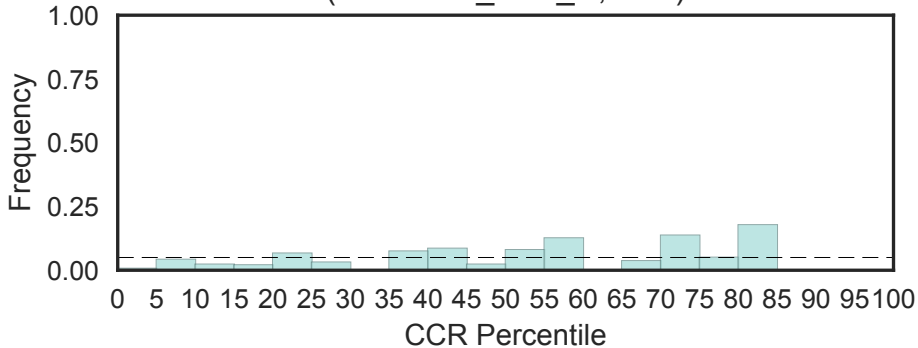

Coatomer epsilon subunit  
(Coatomer\_E, N=1)

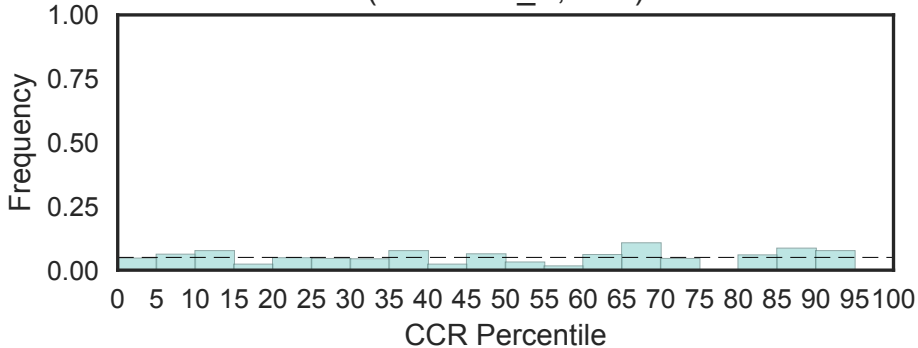

Coatomer WD associated region  
(Coatomer\_WDAD, N=2)

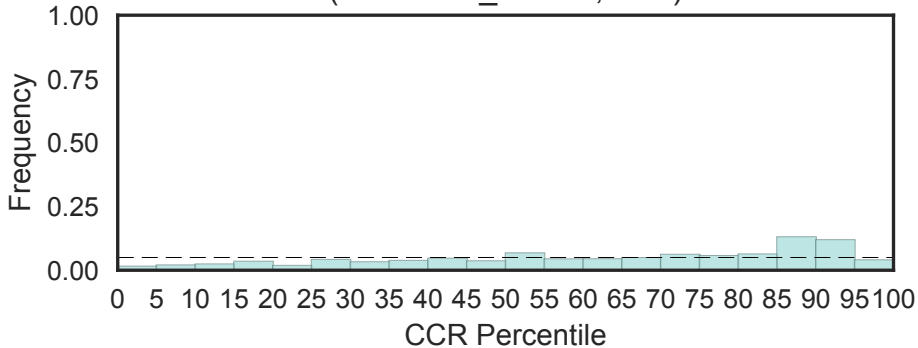

Coatomer beta subunit appendage platform  
(Coatomer\_b\_Cpla, N=1)

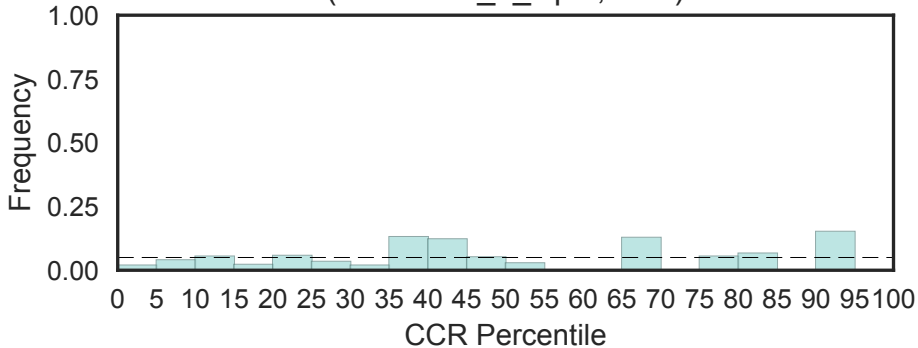

Coatomer subunit gamma-1 C-terminal appendage platform  
(Coatomer\_g\_Cpla, N=1)

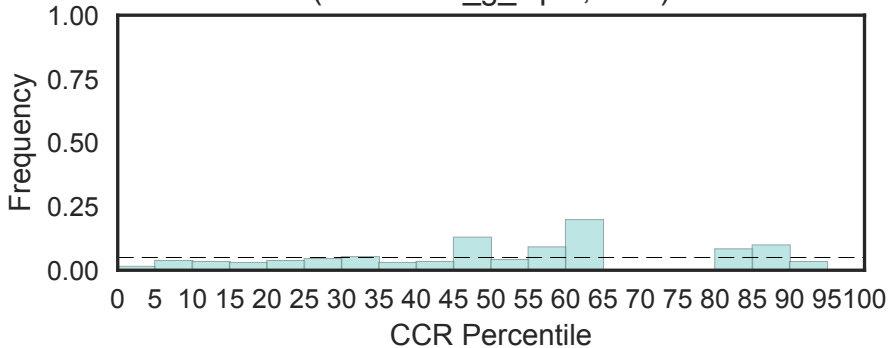



Cobalamin adenosyltransferase  
(Cob\_adeno\_trans, N=1)

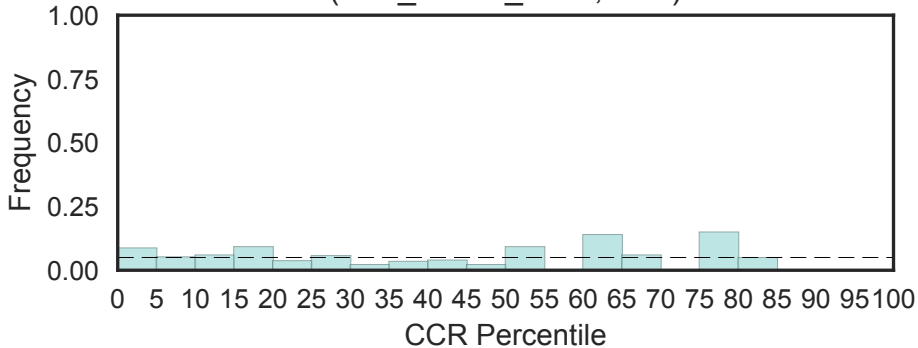

Eukaryotic cobalamin-binding protein  
(Cobalamin\_bind, N=3)

Fisher's OR: 0; Bonferroni p-val: 1

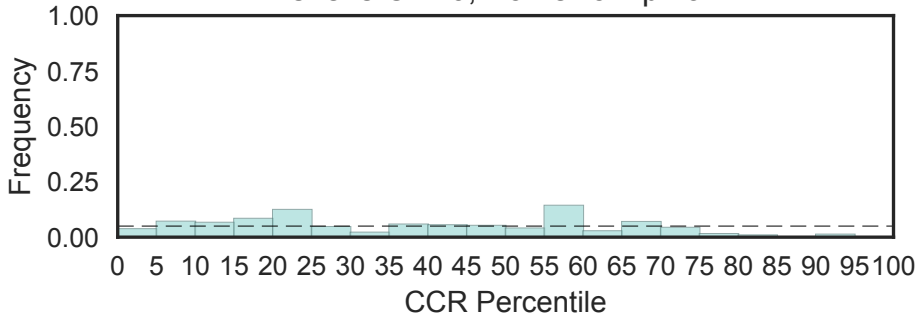

Cordon-bleu ubiquitin-like domain  
(Cobl, N=2)

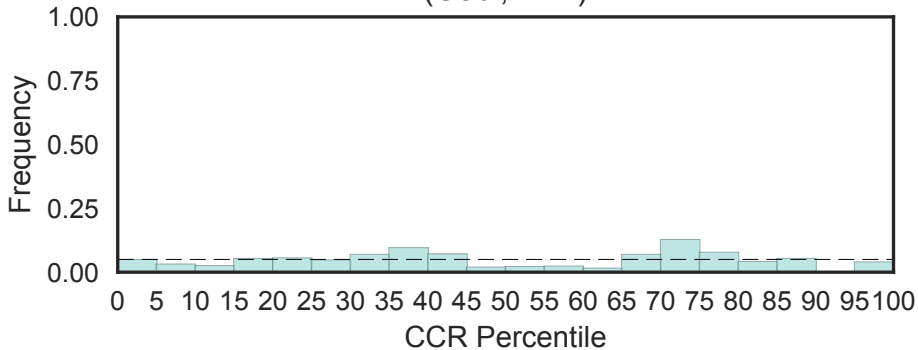

Codanin-1 C-terminus  
(Codanin-1\_C, N=1)

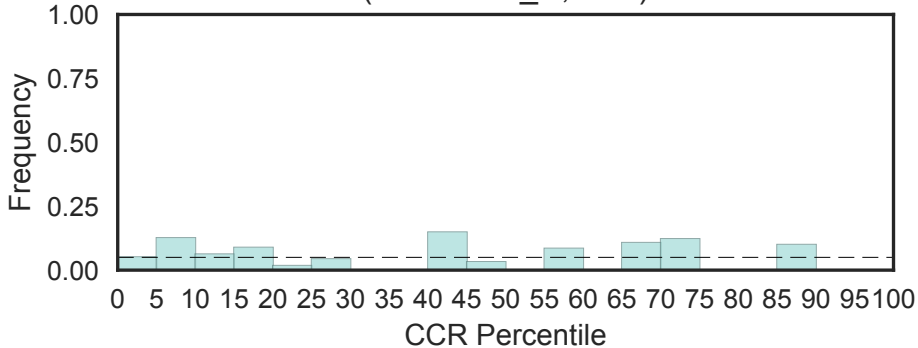

Cofilin/tropomyosin-type actin-binding protein  
(Cofilin\_ADF, N=13)

Fisher's OR: 0.707; Bonferroni p-val: 1

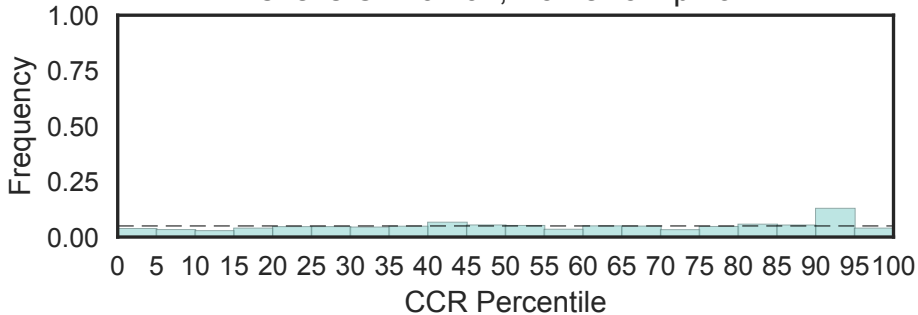

HEAT repeat associated with sister chromatid cohesion  
(Cohesin\_HEAT, N=7)

Fisher's OR: 3.86; Bonferroni p-val: 1

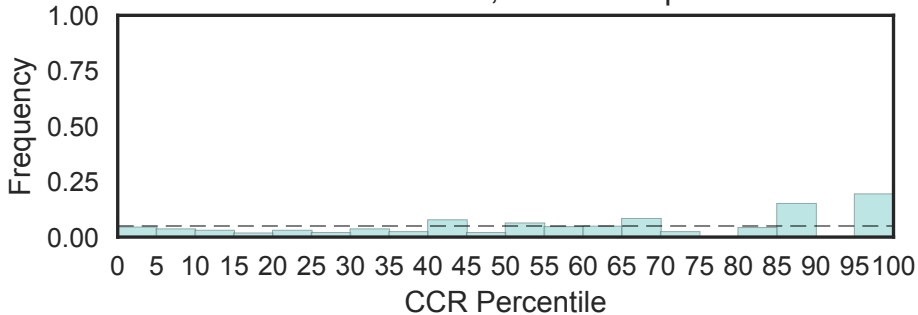

# Cohesin loading factor (Cohesin\_load, N=2)

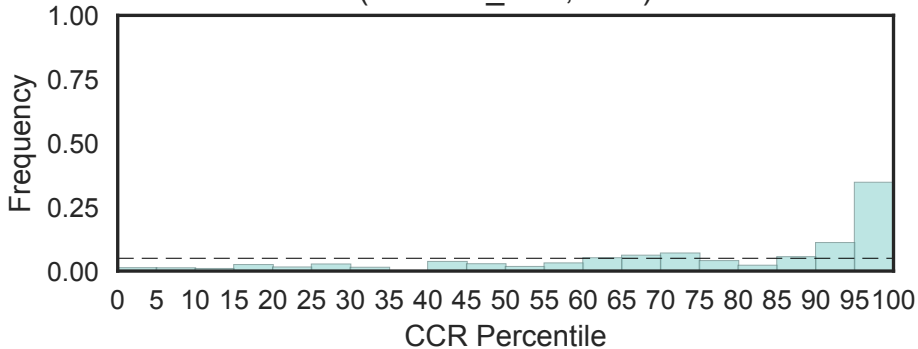

Coiled-coil domain-containing protein 56  
(Coiled-coil\_56, N=1)

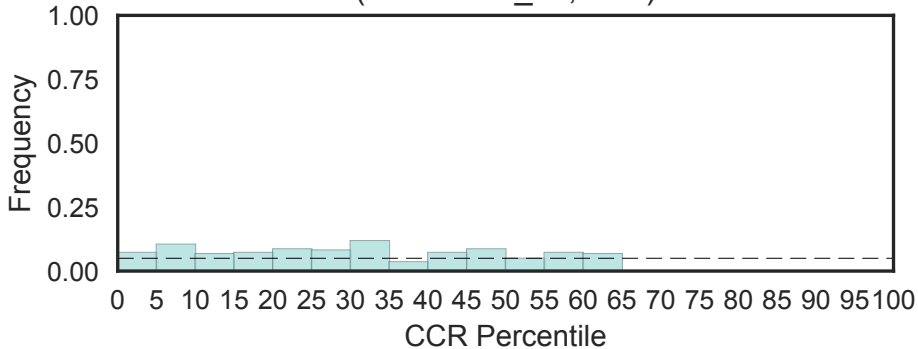



Colipase, N-terminal domain  
(Colipase, N=1)

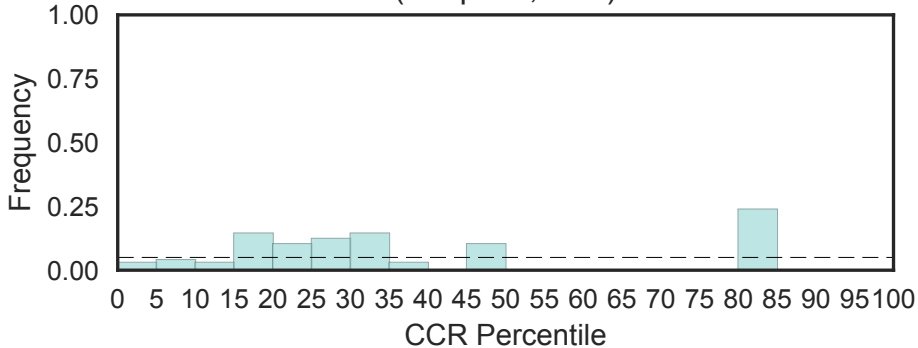

Colipase-like  
(Colipase-like, N=1)

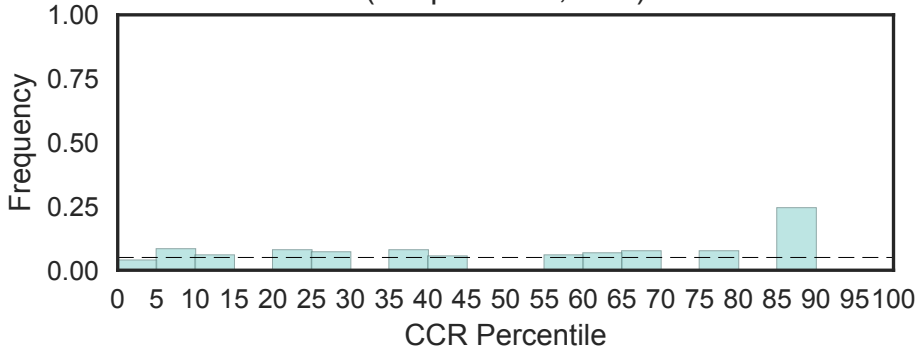

Colipase, C-terminal domain  
(Colipase\_C, N=1)

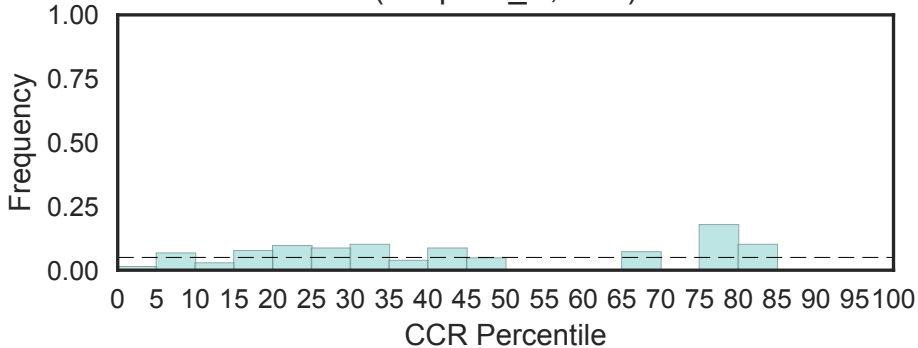

Collagen triple helix repeat (20 copies)  
(Collagen, N=291)

Fisher's OR: 0.52; Bonferroni p-val: 0.279

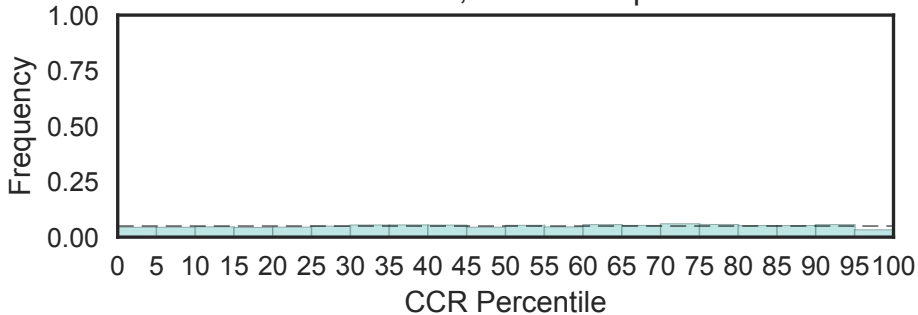

Respiratory-chain NADH dehydrogenase, 30 Kd subunit  
(Complex1\_30kDa, N=1)

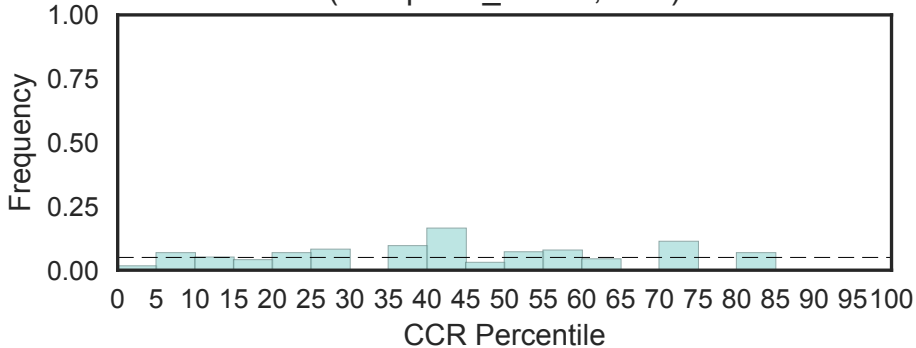

Respiratory-chain NADH dehydrogenase, 49 Kd subunit  
(Complex1\_49kDa, N=1)

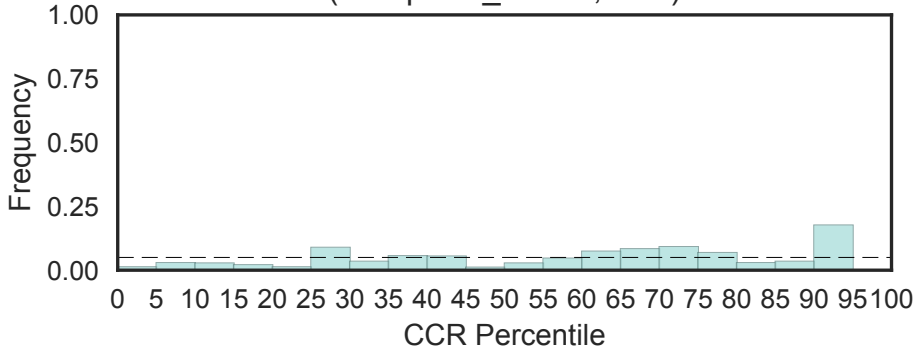

Respiratory-chain NADH dehydrogenase 51 Kd subunit  
(Complex1\_51K, N=1)

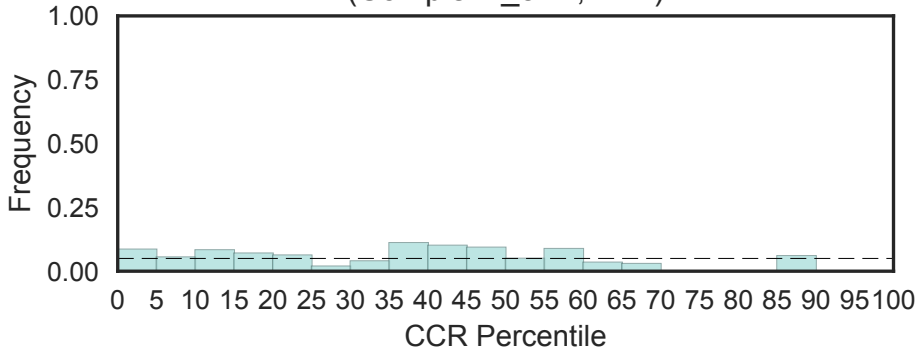

Complex 1 protein (LYR family)  
(Complex1\_LYR, N=11)

Fisher's OR: 0; Bonferroni p-val: 1

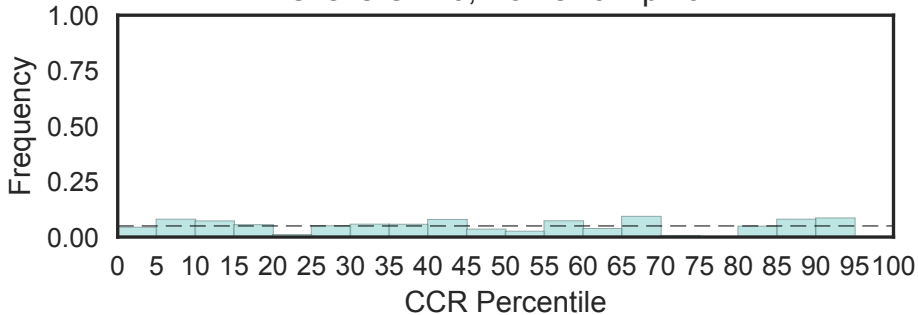



Complex1\_LYR-like  
(Complex1\_LYR\_1, N=2)

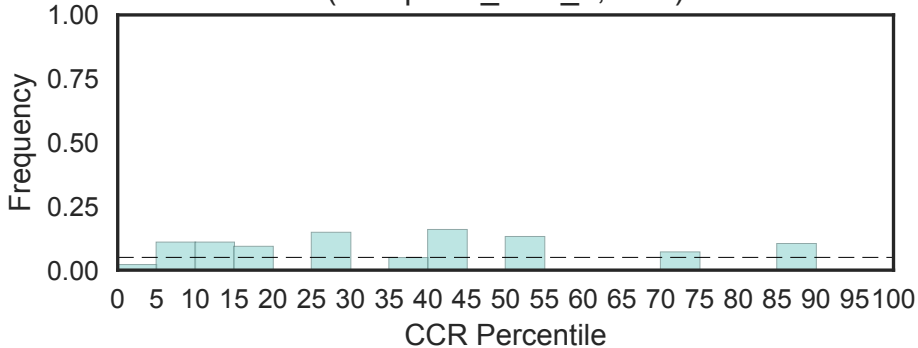

Complex1\_LYR-like  
(Complex1\_LYR\_2, N=5)  
Fisher's OR: 0; Bonferroni p-val: 1

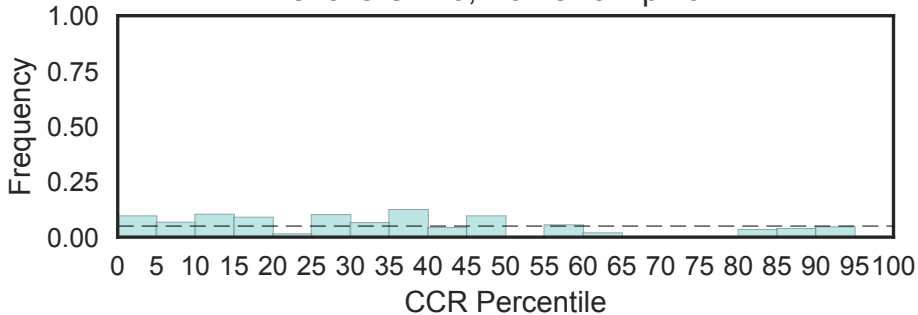

# Condensin II non structural maintenance of chromosomes subunit (Condensin2nSMC, N=1)

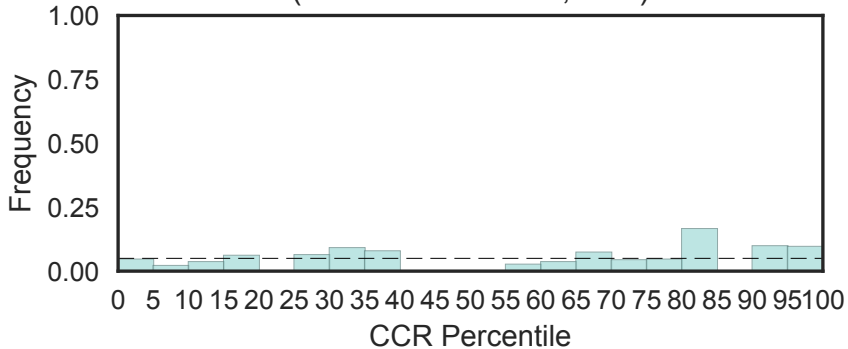

Connexin  
(Connexin, N=20)

Fisher's OR: 0.702; Bonferroni p-val: 1

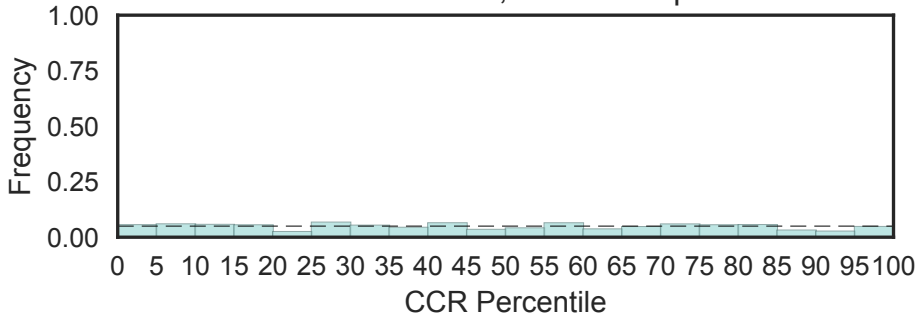

Connexin 40 C-terminal domain  
(Connexin40\_C, N=1)

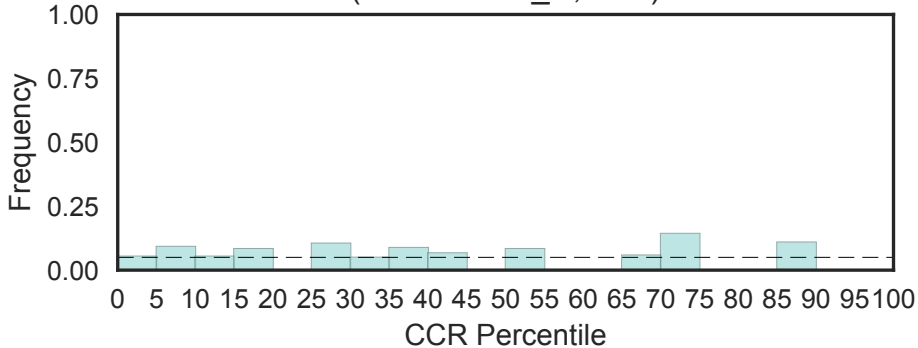

Gap junction alpha-8 protein (Cx50)  
(Connexin50, N=1)

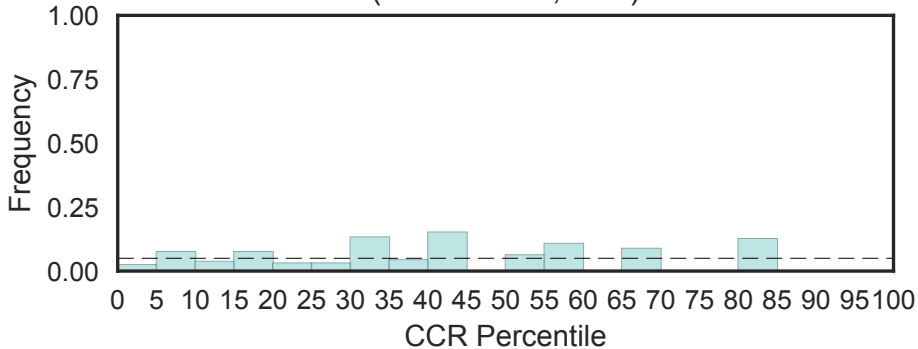

Conserved hypothetical protein 95  
(Cons\_hypoth95, N=3)  
Fisher's OR: 0; Bonferroni p-val: 1

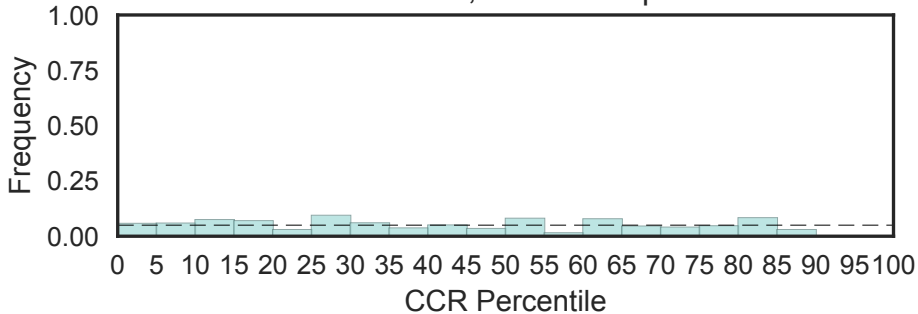

Consortin C-terminus  
(Consortin\_C, N=1)

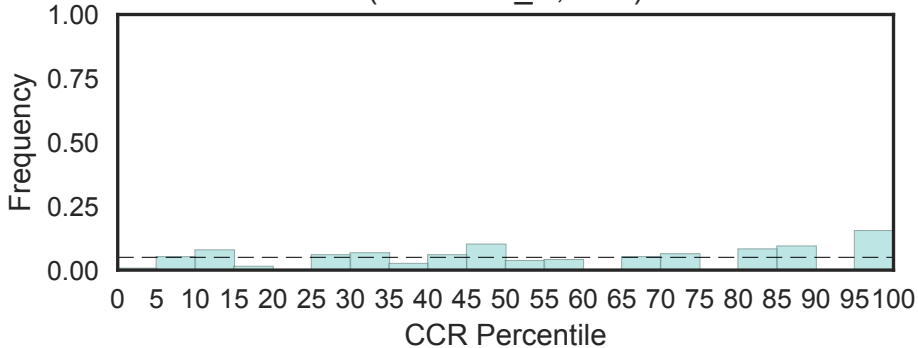



Copine  
(Copine, N=9)

Fisher's OR: 0.759; Bonferroni p-val: 1

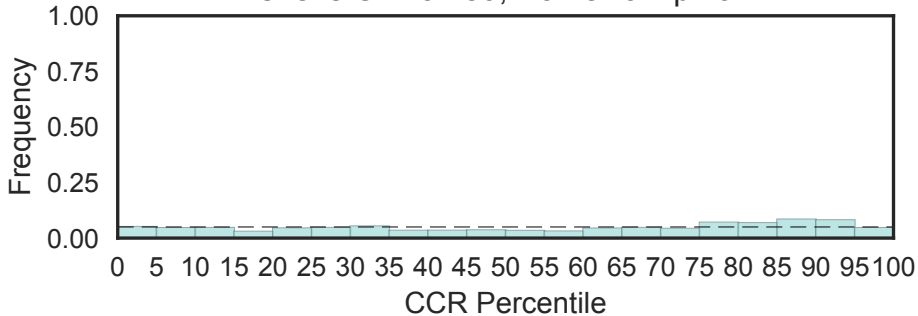

Coproporphyrinogen III oxidase  
(Coprogen\_oxidase, N=1)

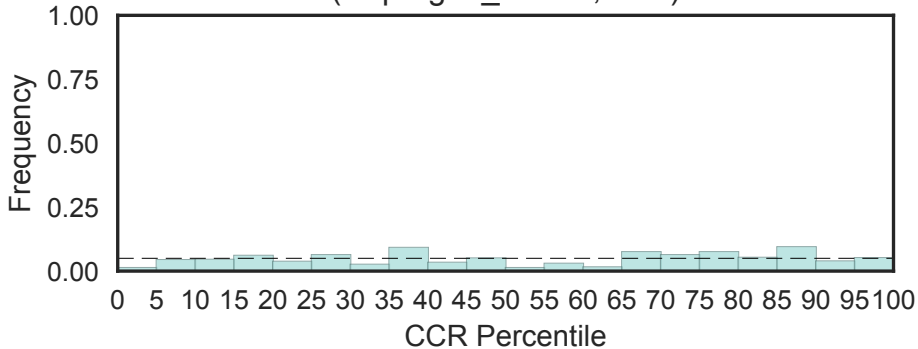

# Coenzyme Q (ubiquinone) biosynthesis protein Coq4 (Coq4, N=1)

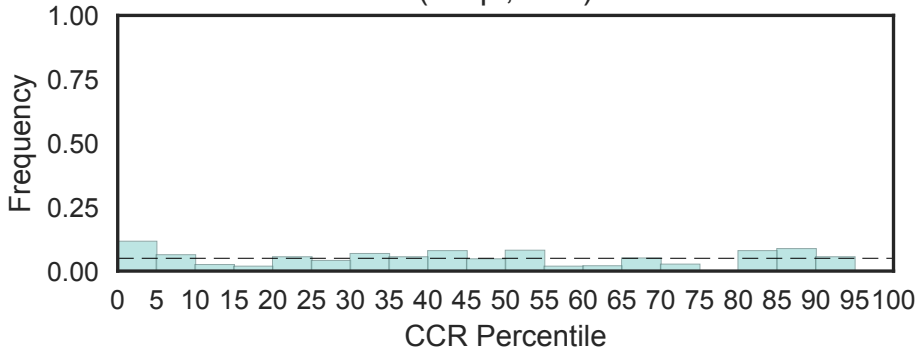

Cor1/Xlr/Xmr conserved region  
(Cor1, N=1)

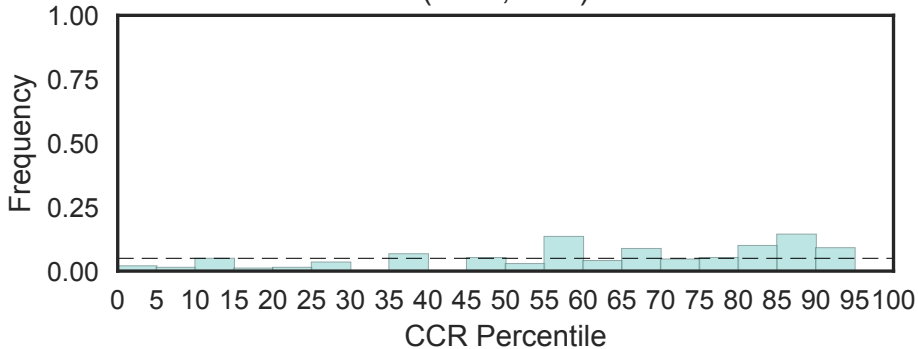

Cornichon protein  
(Cornichon, N=4)

Fisher's OR: 7.16; Bonferroni p-val: 0.0546

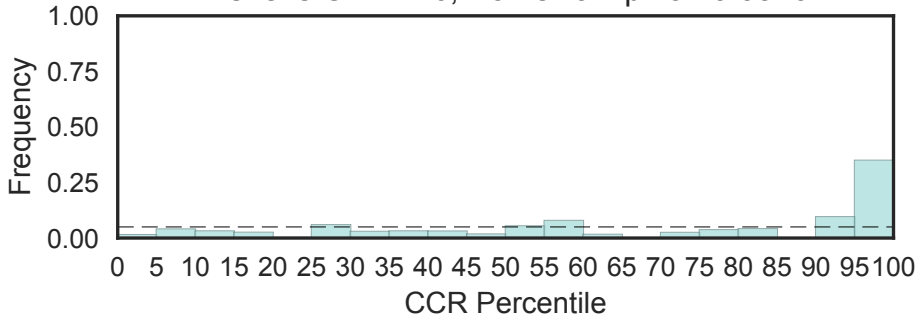

Cornifin (SPRR) family  
(Cornifin, N=3)

Fisher's OR: 0; Bonferroni p-val: 1

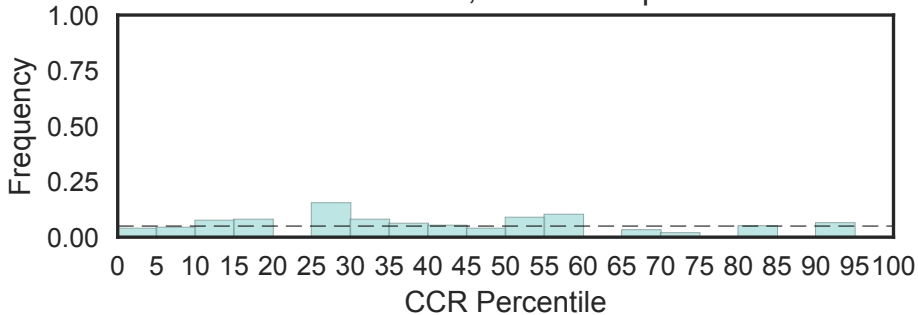

Cortactin-binding protein-2  
(CortBP2, N=4)

Fisher's OR: 0.936; Bonferroni p-val: 1

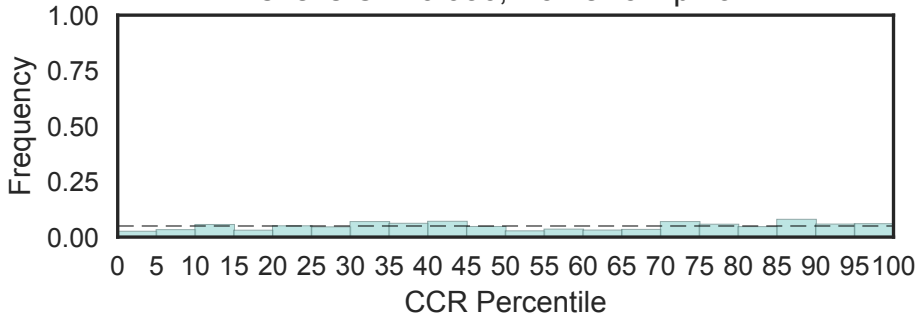

Cortexin of kidney  
(Cortexin, N=3)

Fisher's OR: 2.08; Bonferroni p-val: 1

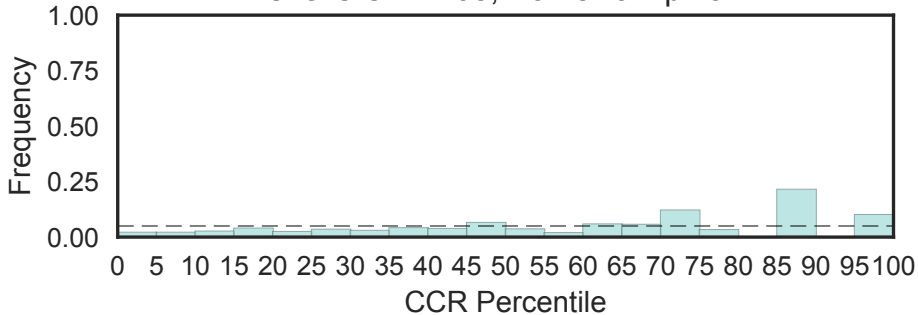



# Costars (Costars, N=2)

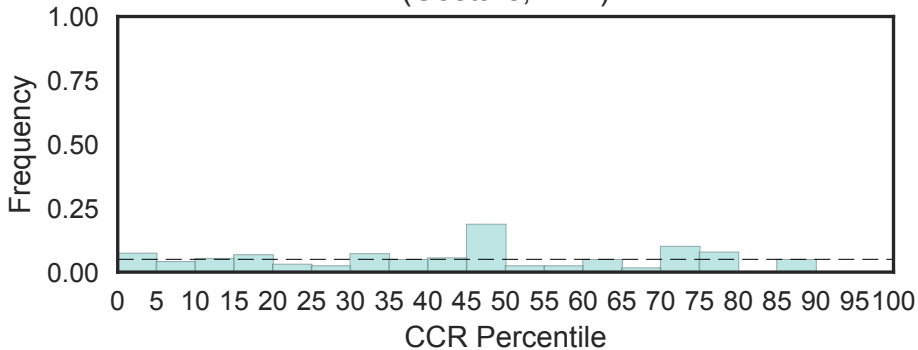

# Chaperonin 10 Kd subunit (Cpn10, N=2)

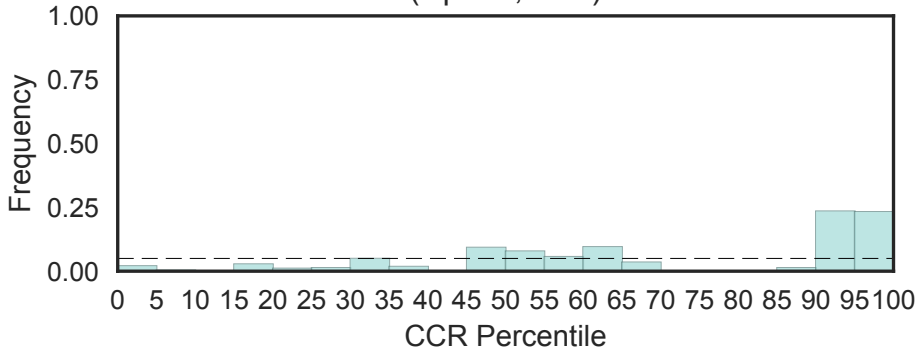

TCP-1/cpn60 chaperonin family  
(Cpn60\_TCP1, N=17)  
Fisher's OR: 0.894; Bonferroni p-val: 1

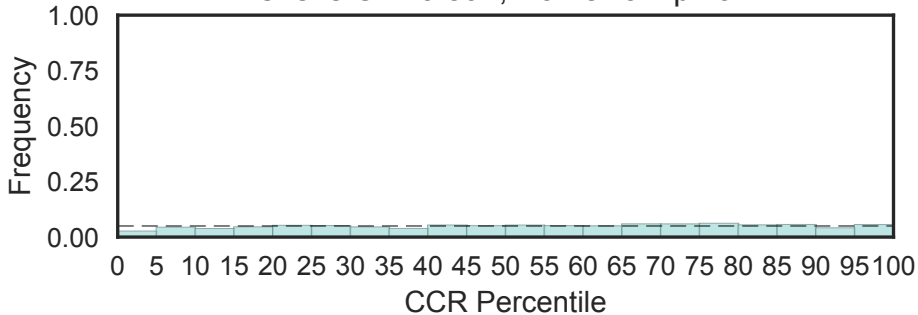

Creatinase/Prolidase N-terminal domain  
(Creatinase\_N, N=1)

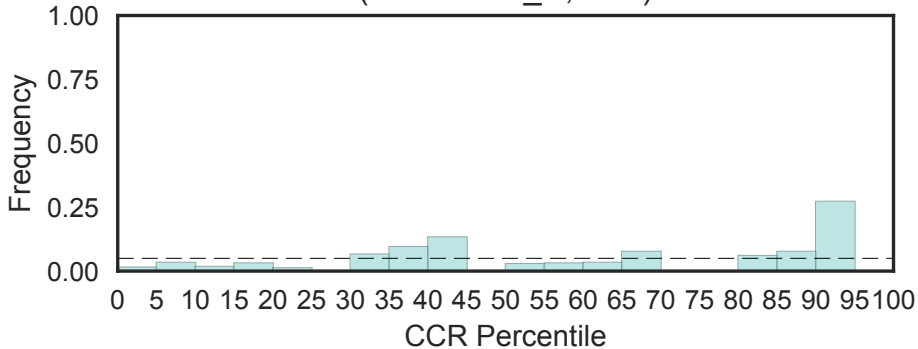

Creatinase/Prolidase N-terminal domain  
(Creatinase\_N\_2, N=1)

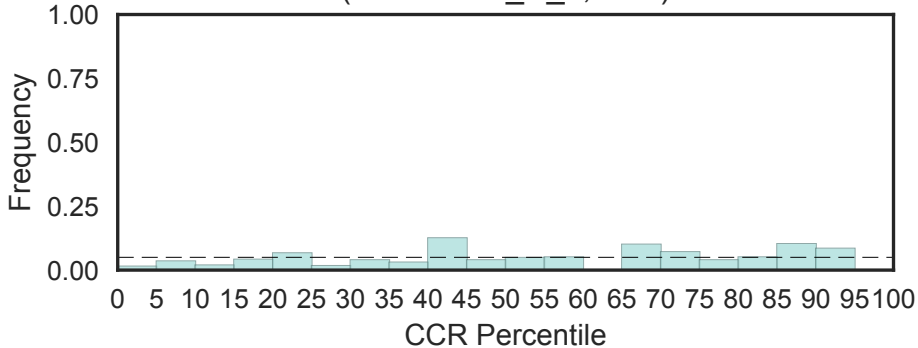

Creb binding  
(Creb\_binding, N=2)

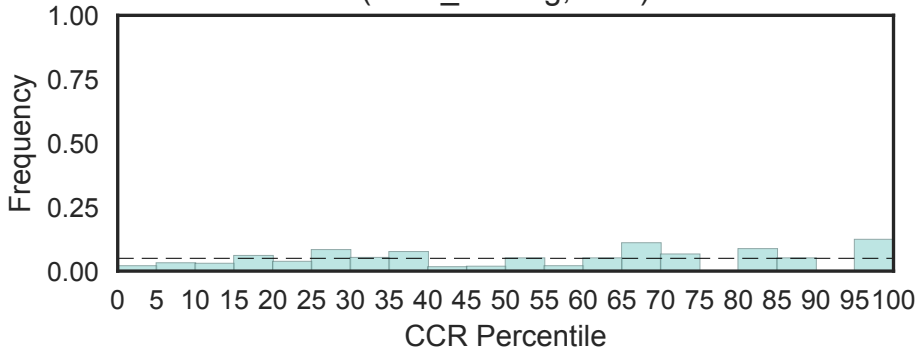

Microtubule-associated protein CRIPT  
(Cript, N=1)

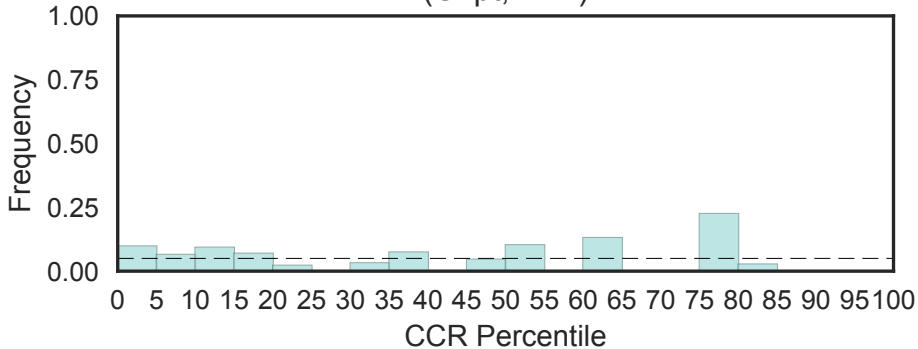

Crisp  
(Crisp, N=3)

Fisher's OR: 0; Bonferroni p-val: 1

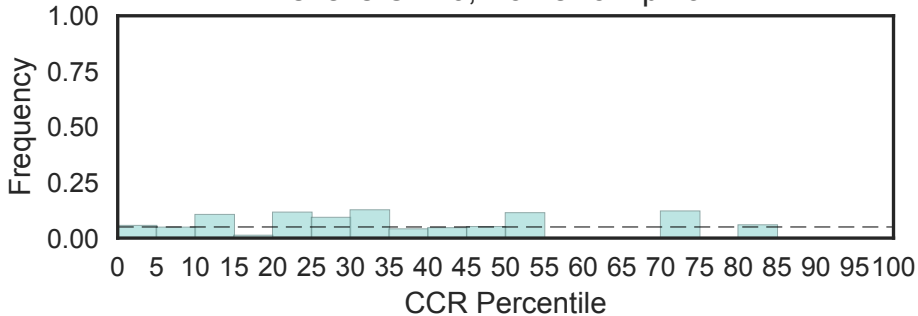



Beta/Gamma crystallin  
(Crystall, N=45)

Fisher's OR: 0; Bonferroni p-val: 0.0361

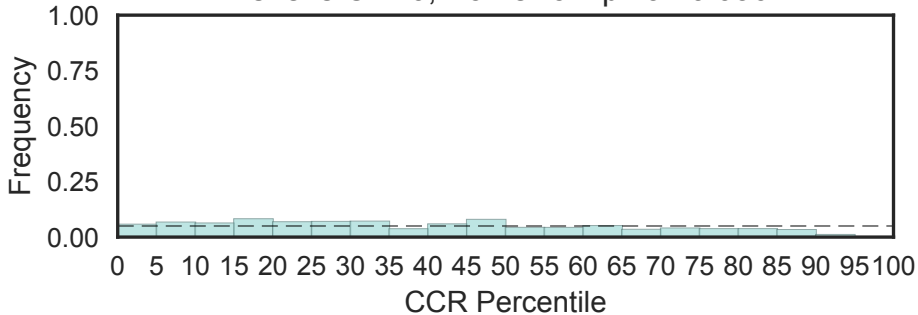

Alpha crystallin A chain, N terminal  
(Crystallin, N=3)

Fisher's OR: 0; Bonferroni p-val: 1

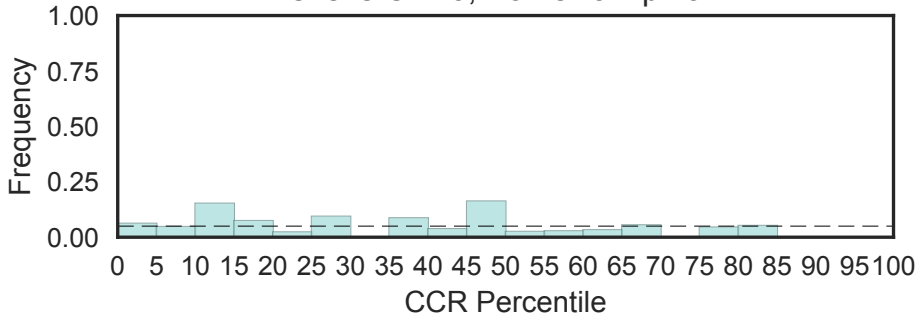

Cse1  
(Cse1, N=3)

Fisher's OR: 0.704; Bonferroni p-val: 1

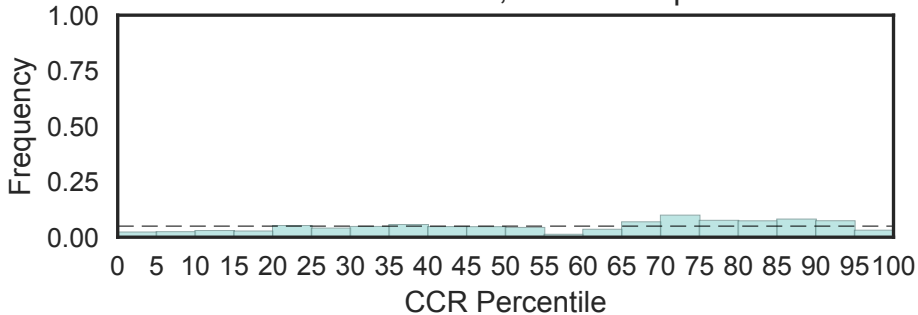

Tumour-suppressor protein CtIP N-terminal domain  
(CtIP\_N, N=2)

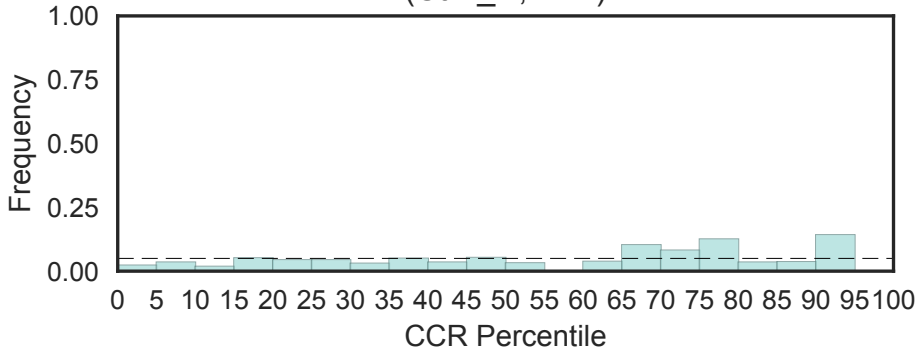

Cytochrome c oxidase assembly protein CtaG/Cox11  
(CtaG\_Cox11, N=1)

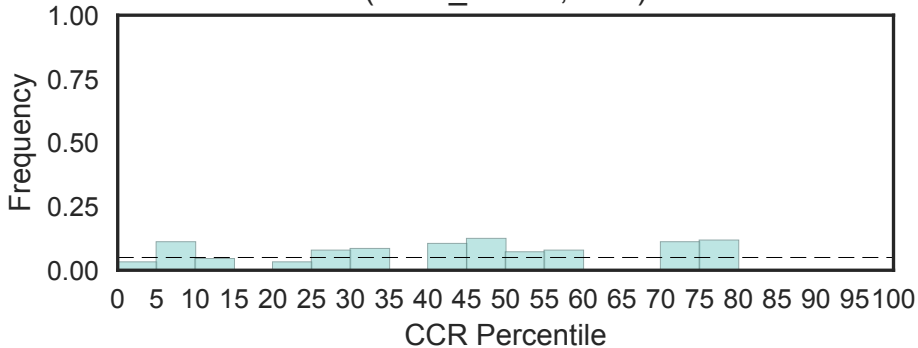

Ctr copper transporter family  
(Ctr, N=2)

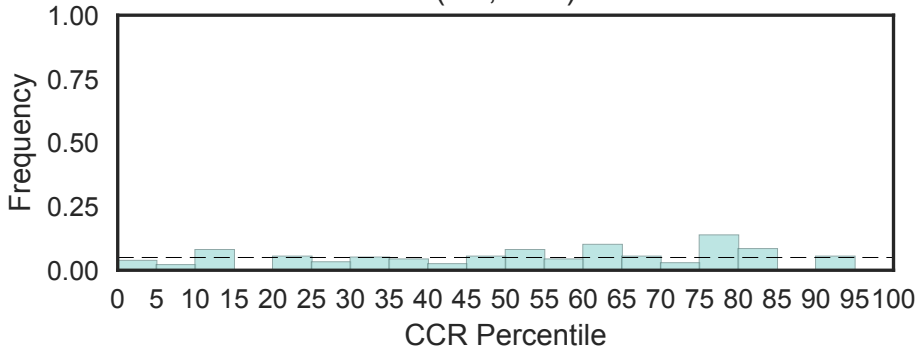

Putative metal-binding motif  
(Cu-binding\_MopE, N=2)

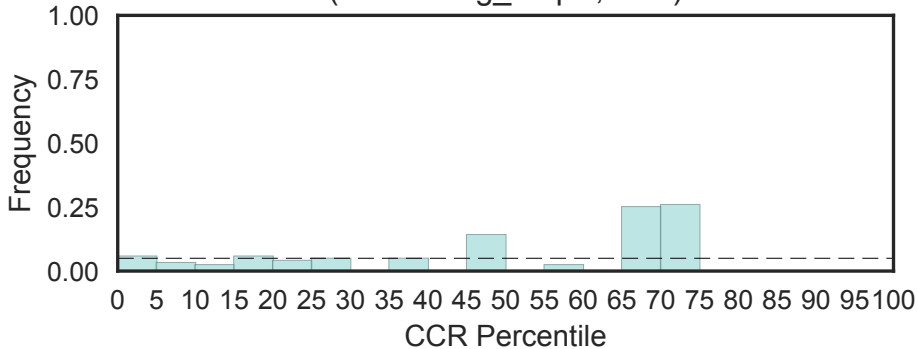

Multicopper oxidase  
(Cu-oxidase, N=1)

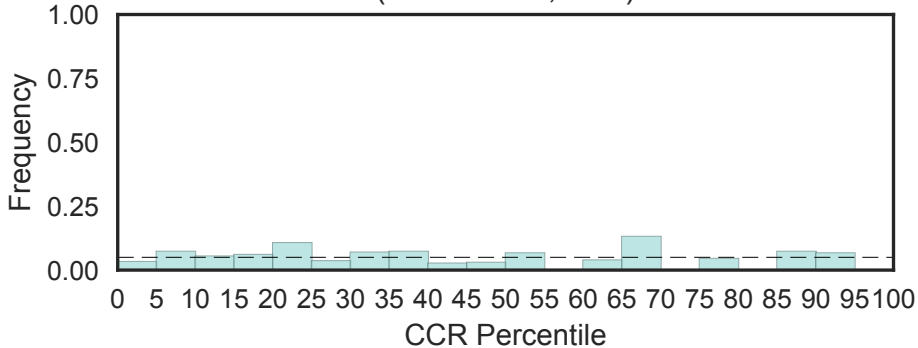



Multicopper oxidase  
(Cu-oxidase\_2, N=4)  
Fisher's OR: 0; Bonferroni p-val: 1

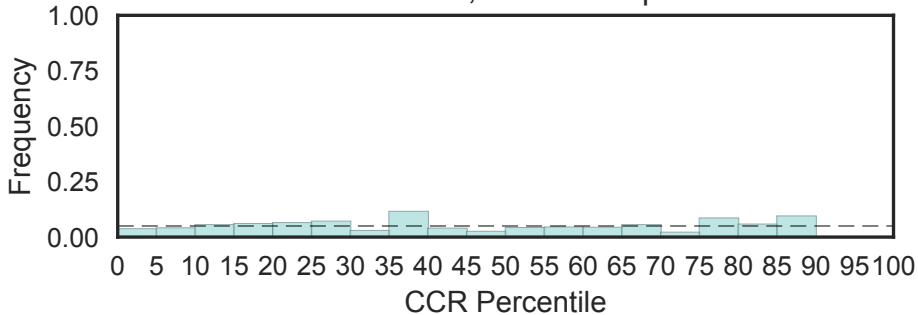

Multicopper oxidase  
(Cu-oxidase\_3, N=7)  
Fisher's OR: 0; Bonferroni p-val: 1

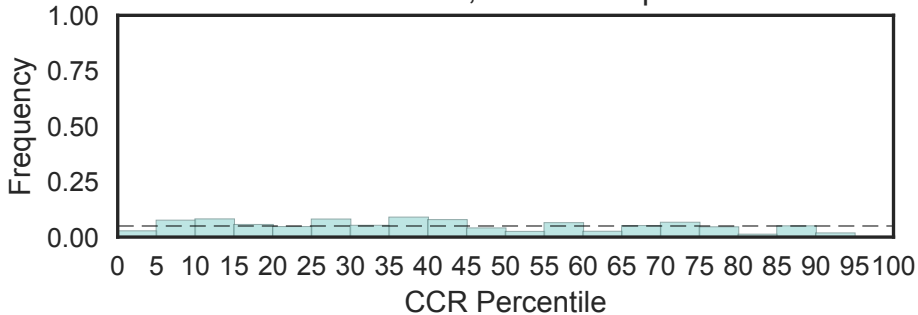

Multi-copper polyphenol oxidoreductase laccase  
(Cu-oxidase\_4, N=1)

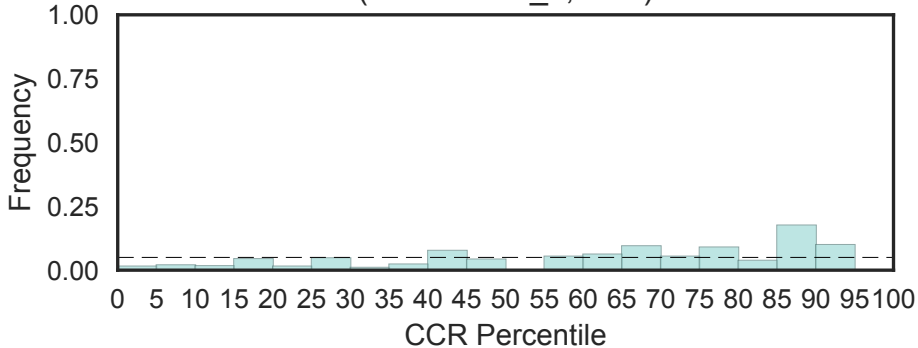

Copper type II ascorbate-dependent monooxygenase, C-terminal domain  
(Cu2\_monoox\_C, N=3)

Fisher's OR: 0; Bonferroni p-val: 1

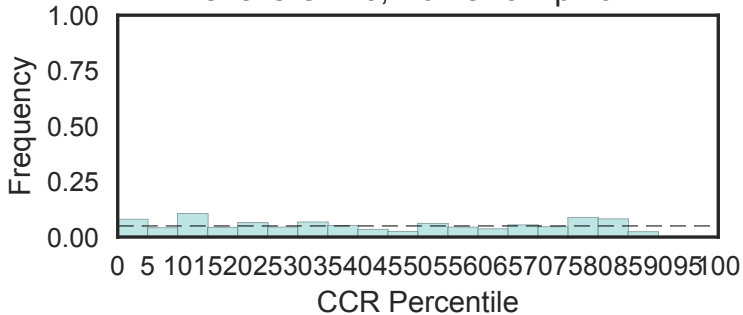

Copper type II ascorbate-dependent monooxygenase, N-terminal domain  
(Cu2\_monooxygen, N=3)

Fisher's OR: 0; Bonferroni p-val: 1

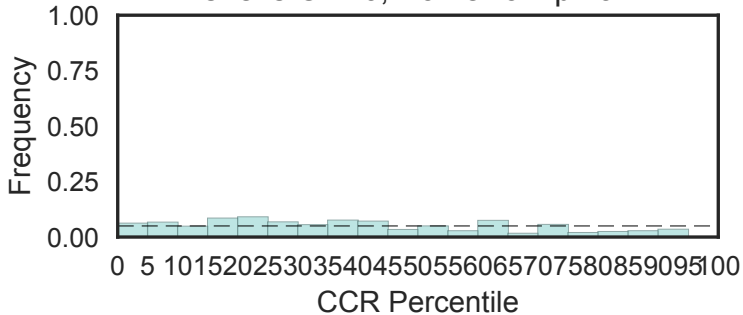

Copper amine oxidase, enzyme domain  
(Cu\_amine\_oxid, N=3)

Fisher's OR: 0; Bonferroni p-val: 1

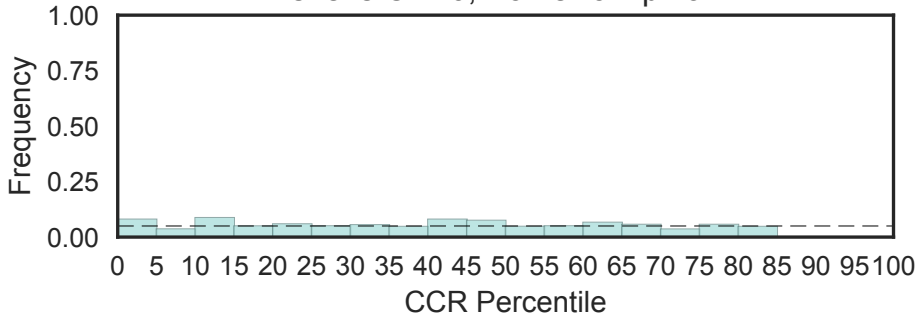

Copper amine oxidase, N2 domain  
(Cu\_amine\_oxidN2, N=3)  
Fisher's OR: 0; Bonferroni p-val: 1

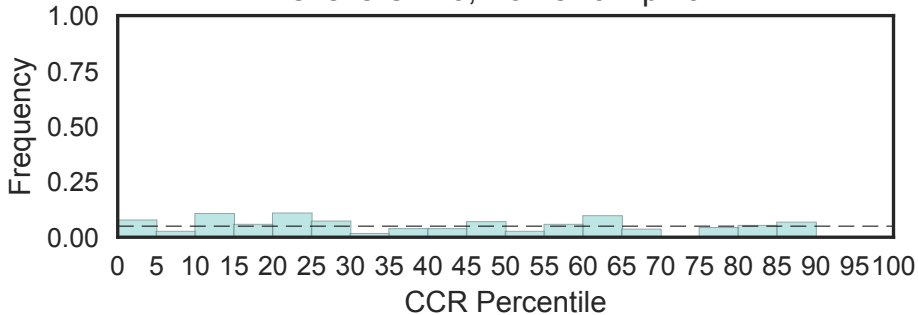

Copper amine oxidase, N3 domain  
(Cu\_amine\_oxidN3, N=3)  
Fisher's OR: 1.09; Bonferroni p-val: 1

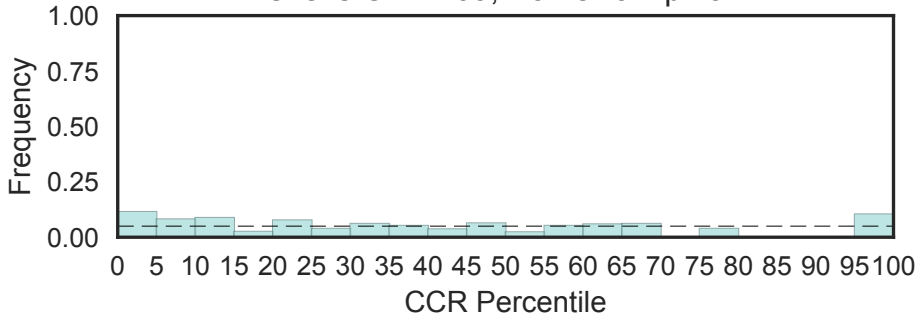



Mouse development and cellular proliferation protein Cullin-7  
(Cul7, N=3)

Fisher's OR: 0; Bonferroni p-val: 1

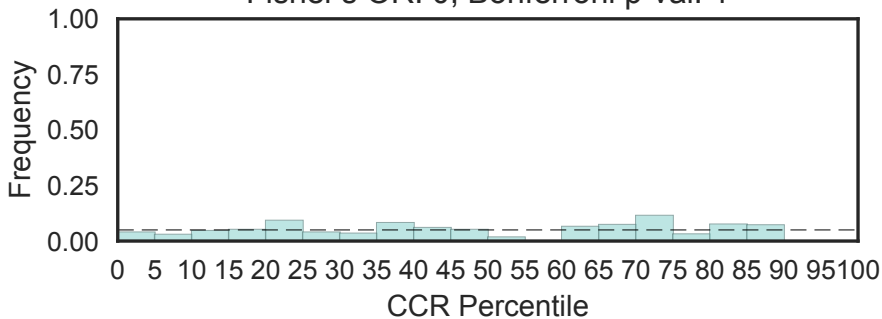

Cullin family  
(Cullin, N=9)

Fisher's OR: 5.97; Bonferroni p-val: 7.52e-21

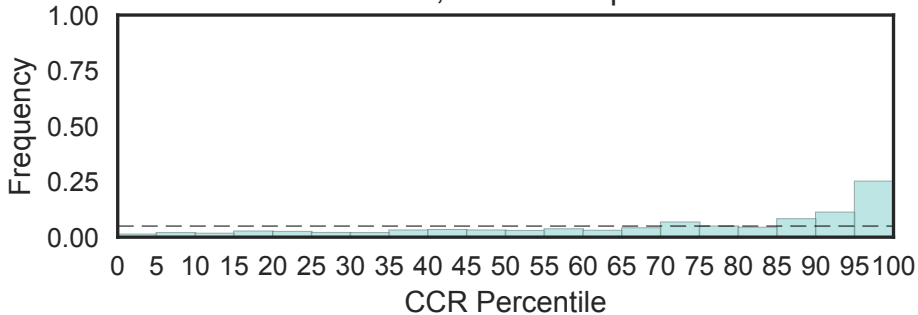

Cullin protein neddylation domain  
(Cullin\_Nedd8, N=5)

Fisher's OR: 13.5; Bonferroni p-val: 0.0636

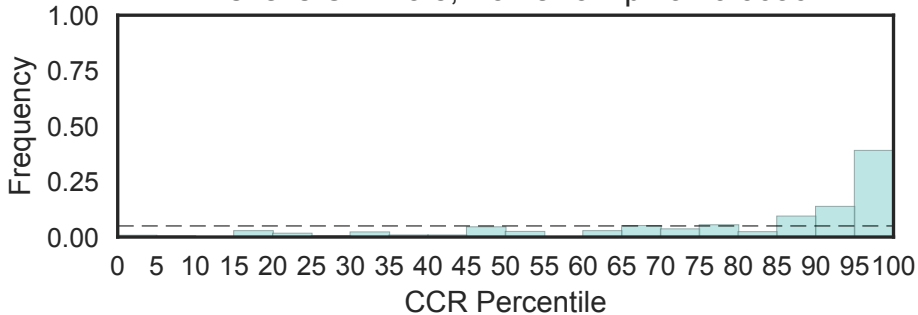

Cullin binding  
(Cullin\_binding, N=5)  
Fisher's OR: 4.04; Bonferroni p-val: 1

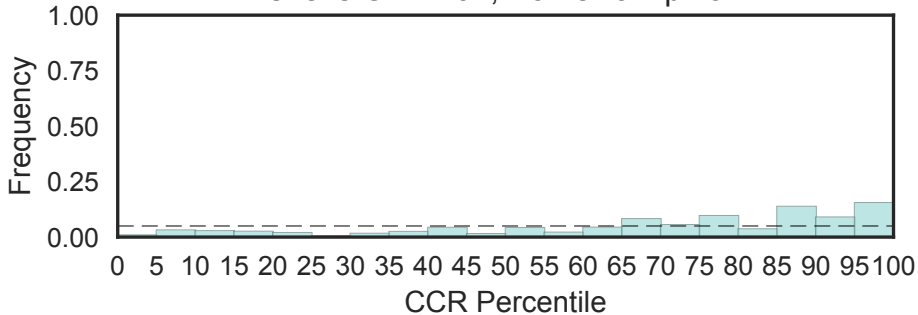

Cupin domain  
(Cupin\_2, N=1)

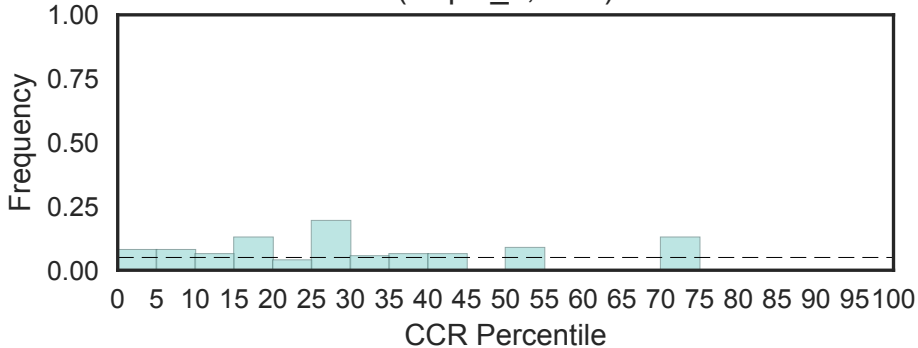

Cupin superfamily protein  
(Cupin\_4, N=6)

Fisher's OR: 0.307; Bonferroni p-val: 1

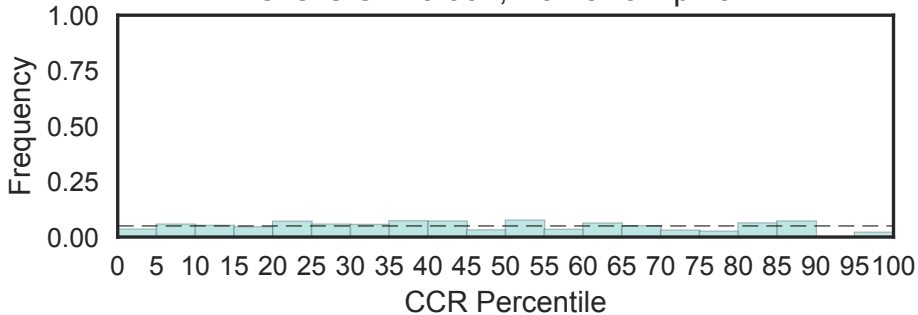

Cupin-like domain  
(Cupin\_8, N=13)

Fisher's OR: 1.22; Bonferroni p-val: 1

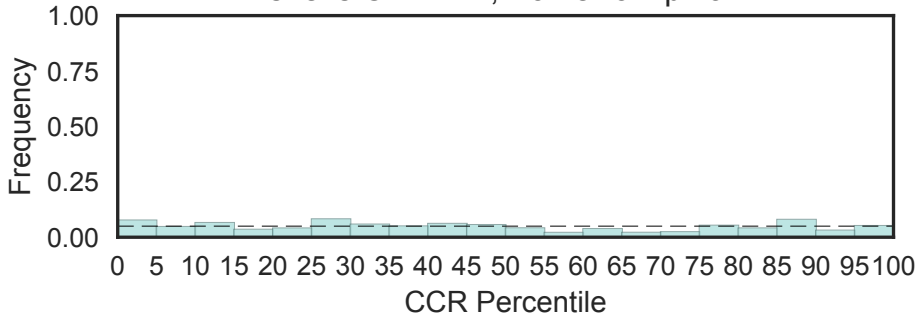

CutC family  
(CutC, N=1)

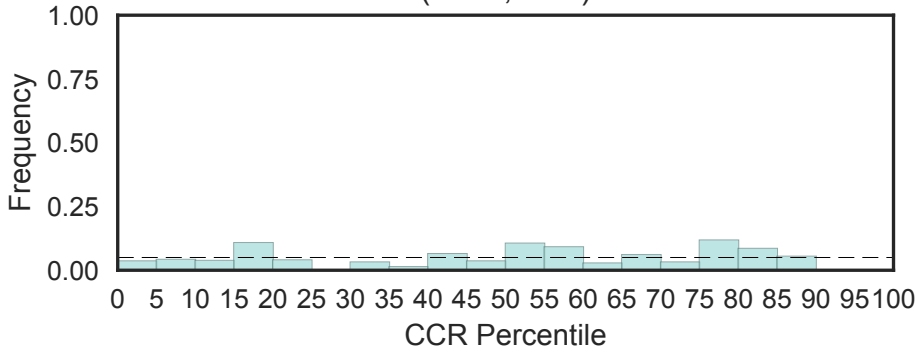



Protein similar to CwfJ C-terminus 1  
(CwfJ\_C\_1, N=2)

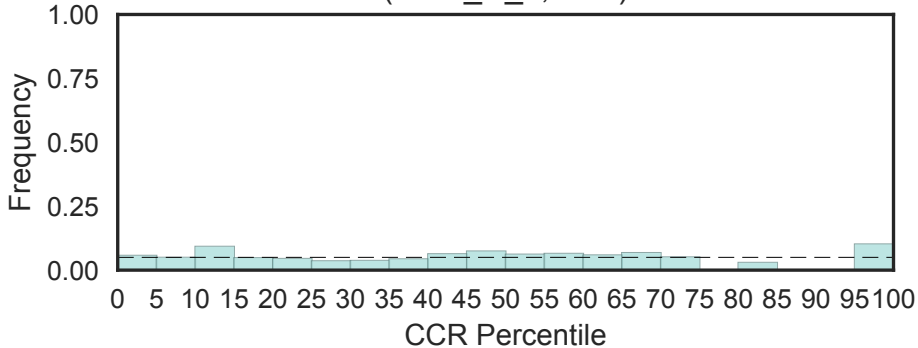

Protein similar to CwfJ C-terminus 2  
(CwfJ\_C\_2, N=2)

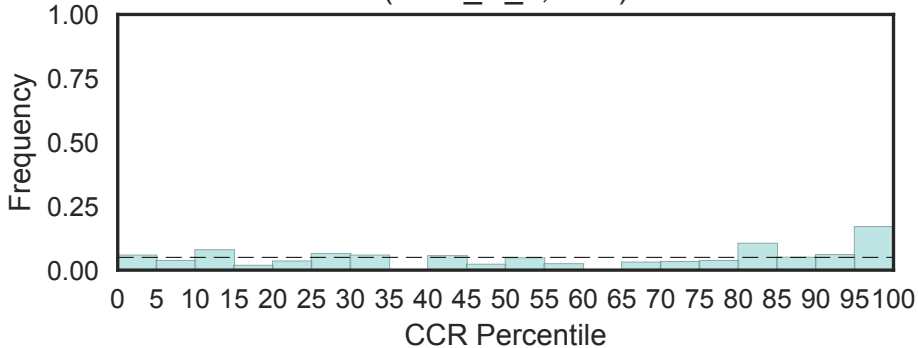

Cwf15/Cwc15 cell cycle control protein  
(Cwf\_Cwc\_15, N=1)

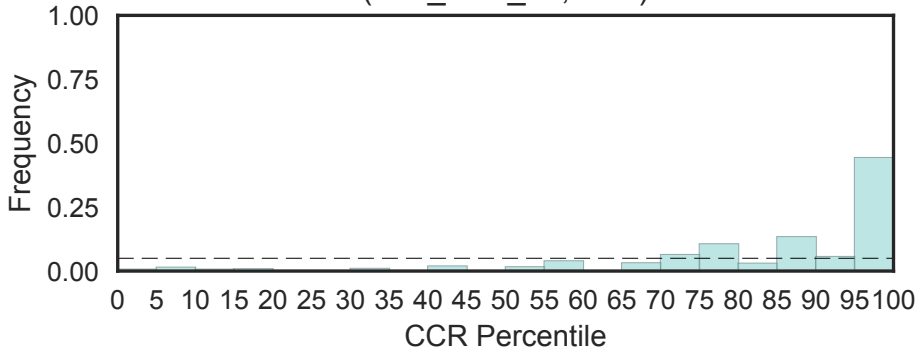

CybS, succinate dehydrogenase cytochrome B small subunit  
(CybS, N=1)

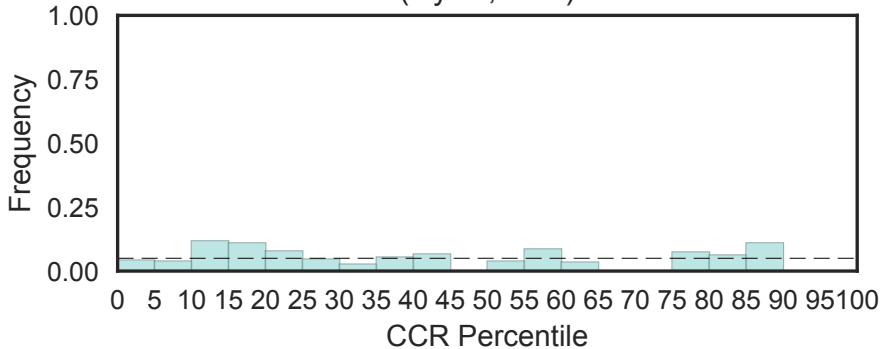

# Cyclin

(Cyclin, N=3)

Fisher's OR: 0; Bonferroni p-val: 1

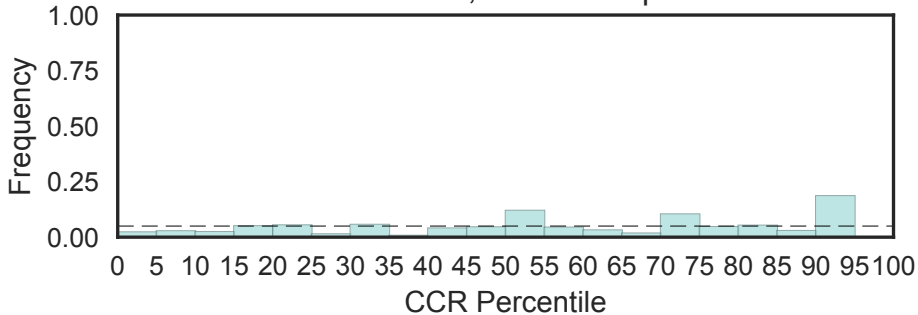

Cyclin, C-terminal domain  
(Cyclin\_C, N=16)

Fisher's OR: 1.88; Bonferroni p-val: 1

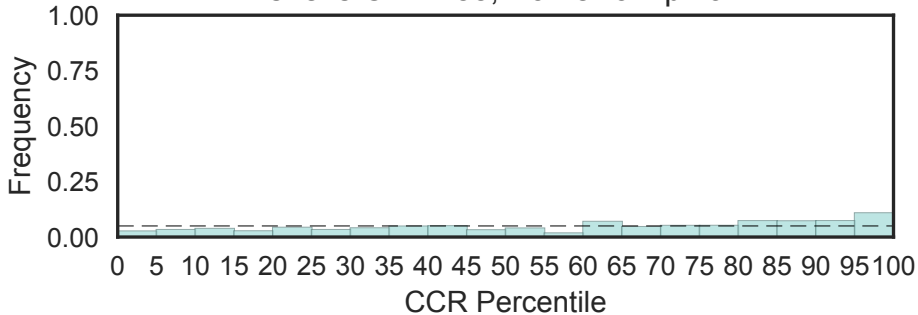

Cyclin C-terminal domain  
(Cyclin\_C\_2, N=2)

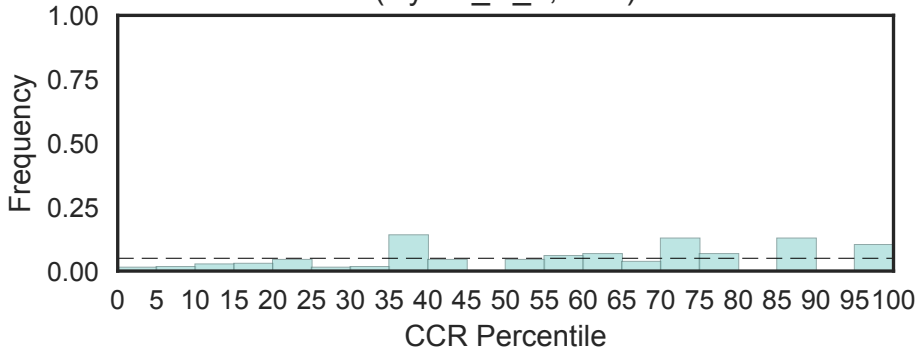

Cyclin, N-terminal domain  
(Cyclin\_N, N=33)

Fisher's OR: 2.14; Bonferroni p-val: 1

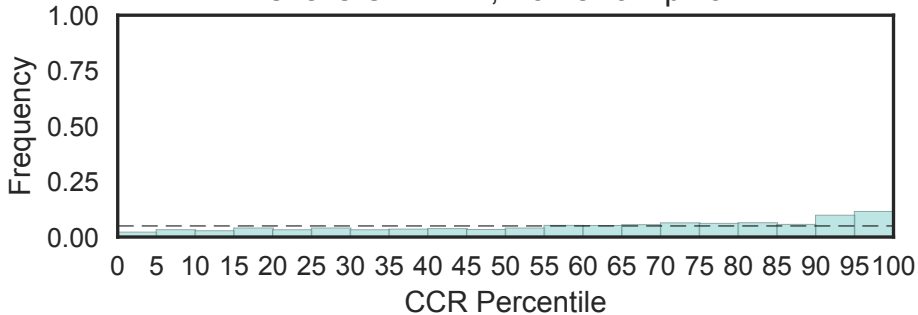



N-terminal region of cyclin\_N  
(Cyclin\_N2, N=1)

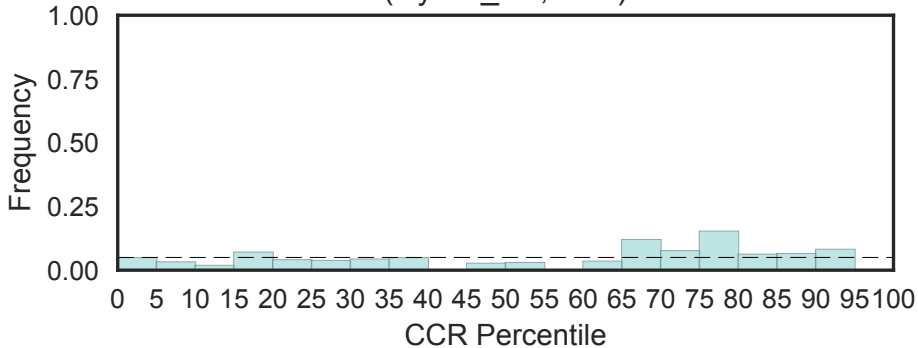

Cylicin N-terminus  
(Cylicin\_N, N=1)

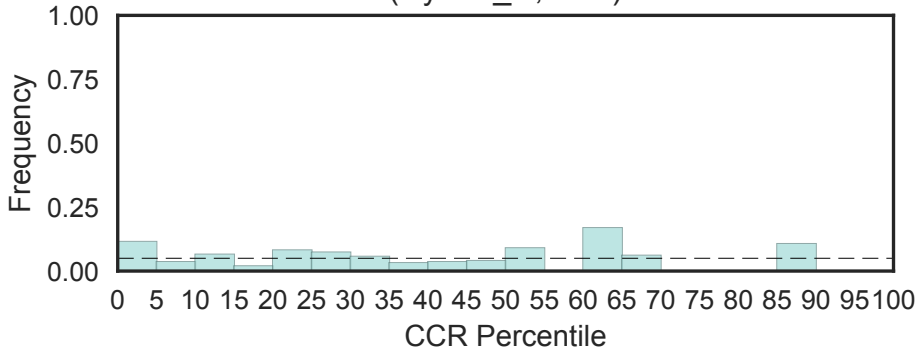

Cys/Met metabolism PLP-dependent enzyme  
(Cys\_Met\_Meta\_PP, N=2)

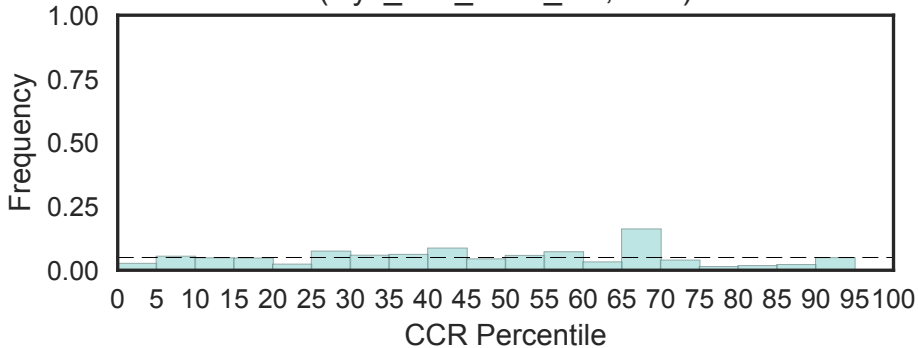

# Cystine-knot domain

(Cys\_knot, N=20)

Fisher's OR: 0; Bonferroni p-val: 1

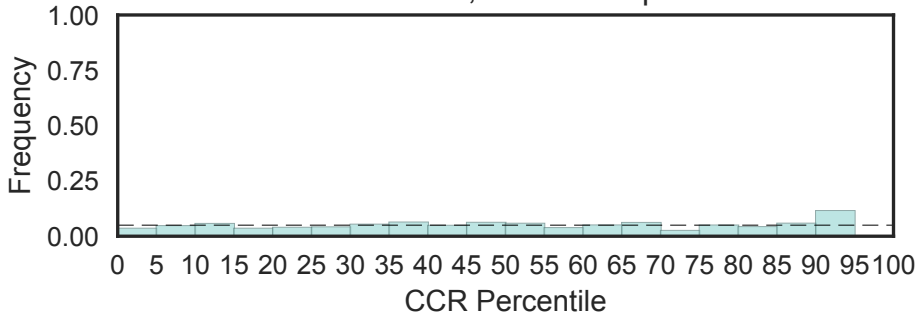

Cysteine rich repeat  
(Cys\_rich\_FGFR, N=15)  
Fisher's OR: 0.4; Bonferroni p-val: 1

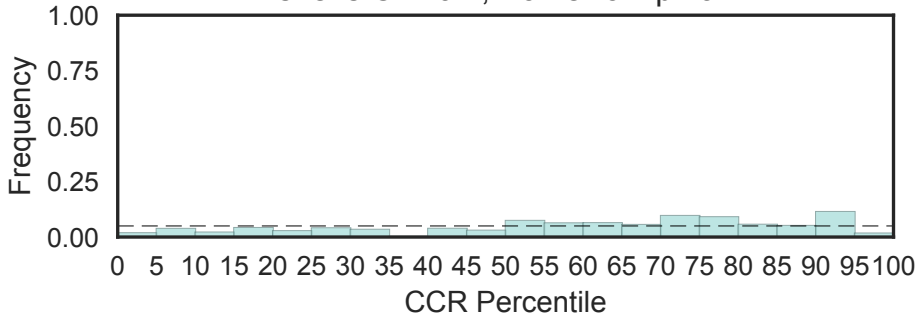

Cystatin domain  
(Cystatin, N=20)

Fisher's OR: 0; Bonferroni p-val: 1

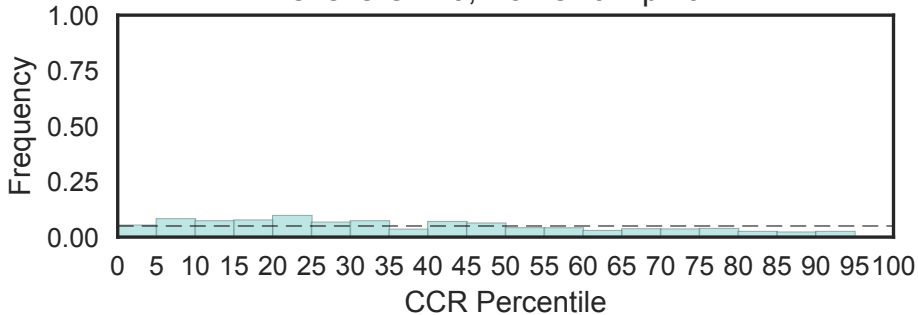

Cytochrome b5-like Heme/Steroid binding domain  
(Cyt-b5, N=14)

Fisher's OR: 1.05; Bonferroni p-val: 1

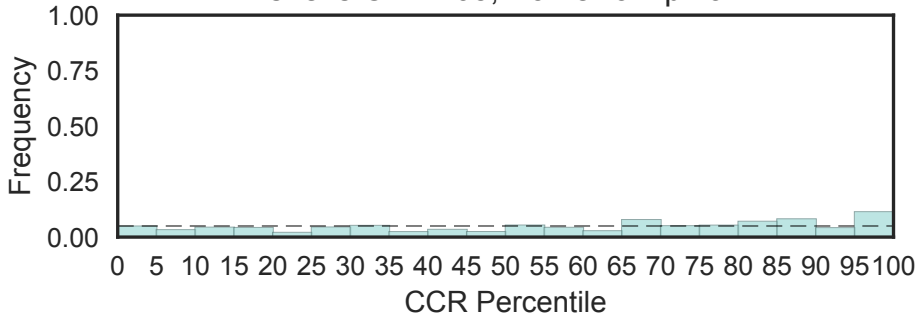

Cytochrome B561, N terminal  
(CytochromB561\_N, N=1)

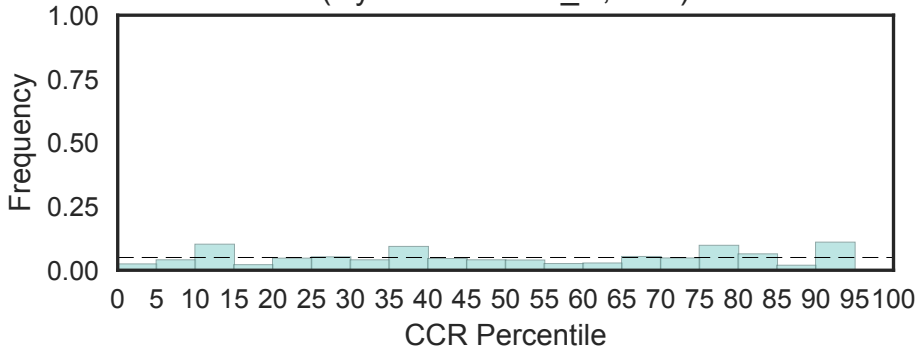



Cytochrome Cytochrome b558 alpha-subunit  
(Cytochrom\_B558a, N=1)

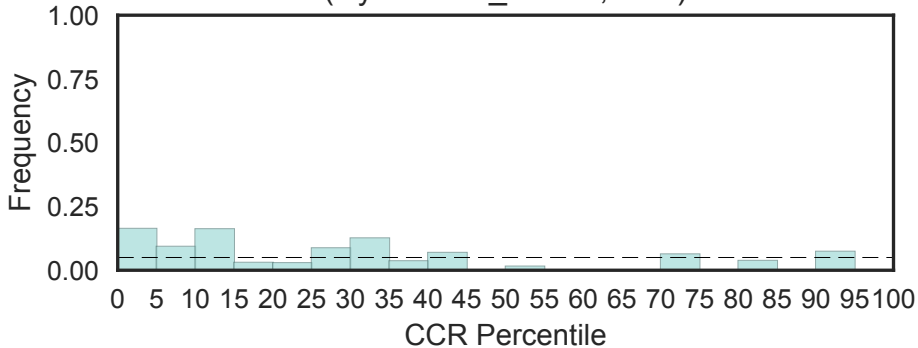

# Eukaryotic cytochrome b561

(Cytochrom\_B561, N=6)

Fisher's OR: 0.714; Bonferroni p-val: 1

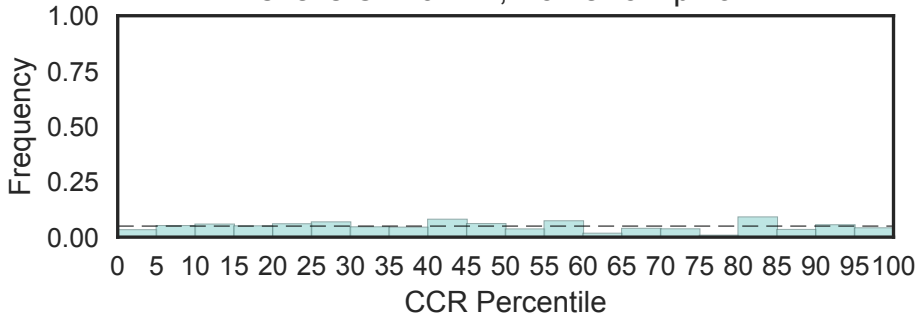

Cytochrome C1 family  
(Cytochrom\_C1, N=1)

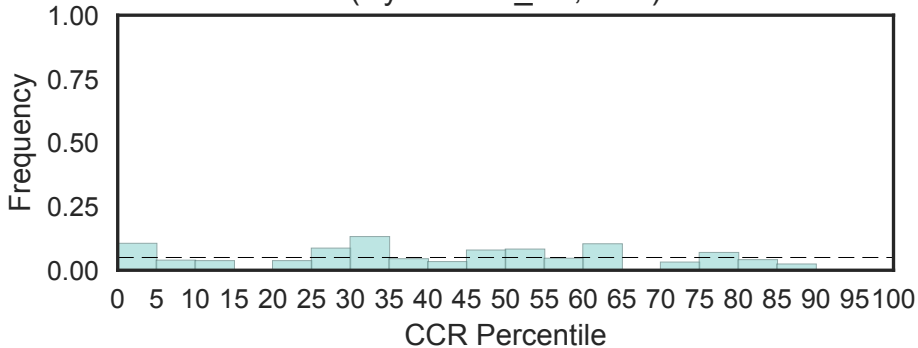

D123  
(D123, N=1)

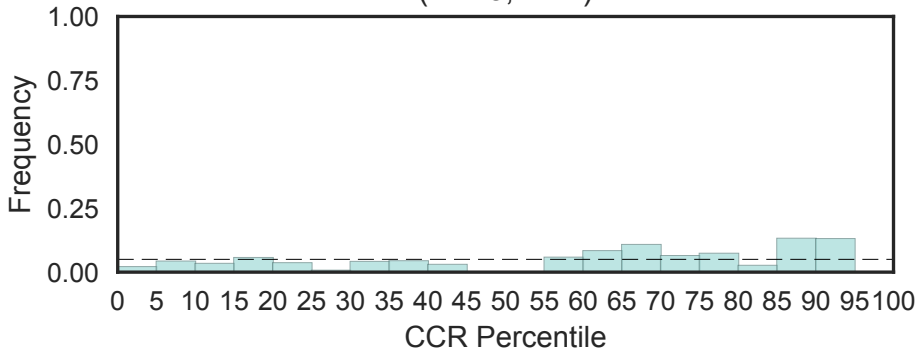

DAD family  
(DAD, N=1)

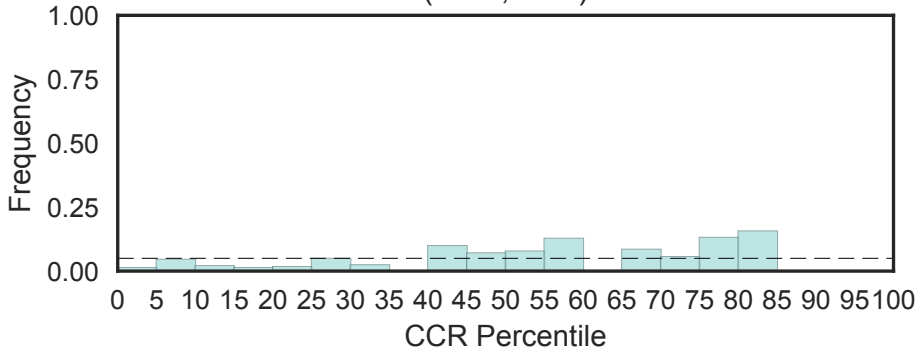

Dystroglycan (Dystrophin-associated glycoprotein 1)  
(DAG1, N=1)

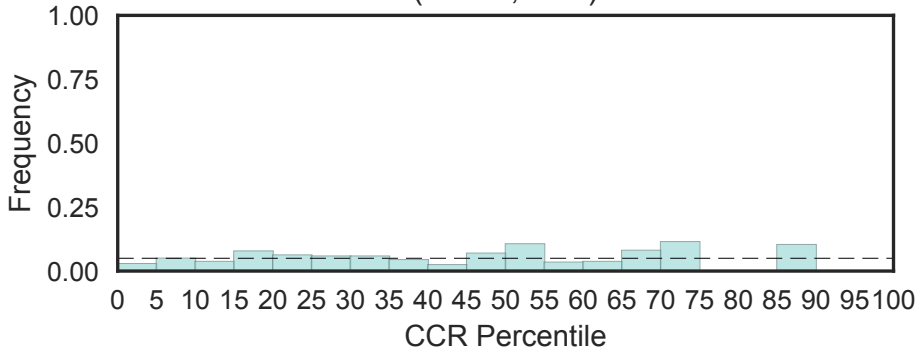

Diacylglycerol acyltransferase  
(DAGAT, N=4)

Fisher's OR: 0; Bonferroni p-val: 1

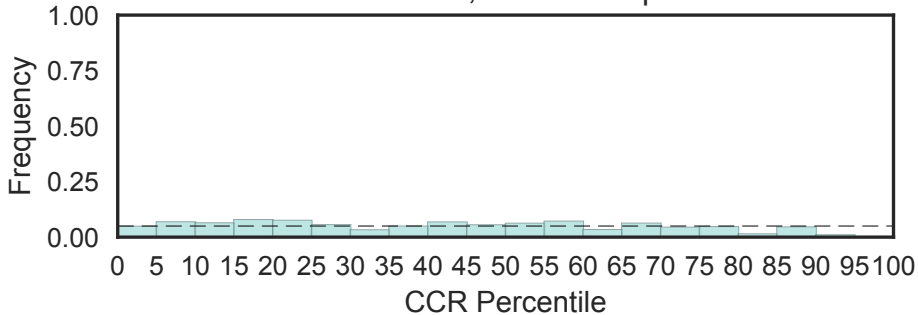

Diacylglycerol kinase accessory domain  
(DAGK\_acc, N=9)

Fisher's OR: 2.86; Bonferroni p-val: 1

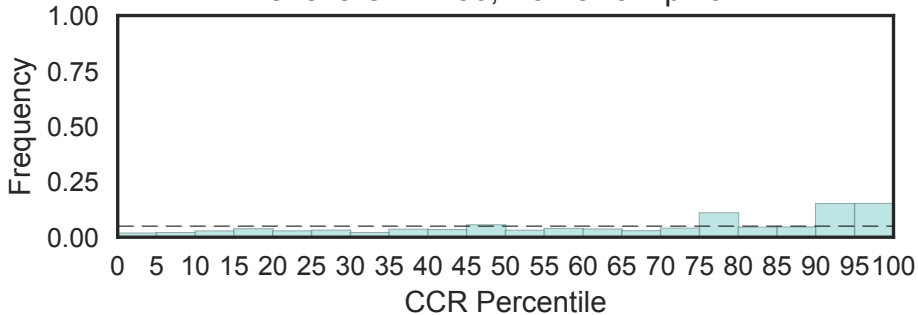



Diacylglycerol kinase catalytic domain  
(DAGK\_cat, N=14)

Fisher's OR: 1.95; Bonferroni p-val: 1

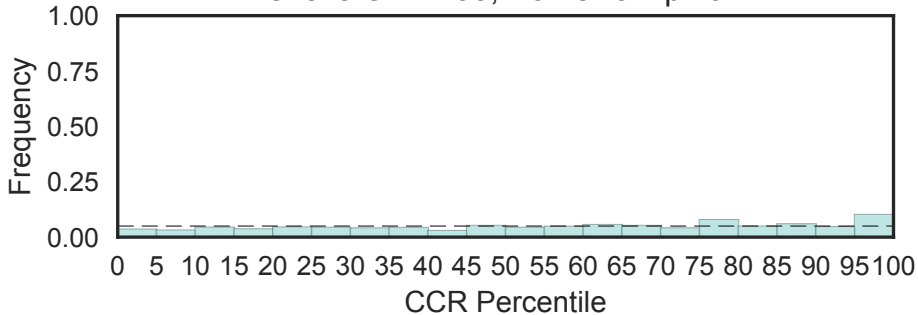

Diacylglycerol kinase N-terminus  
(DAG\_kinase\_N, N=5)

Fisher's OR: 0; Bonferroni p-val: 1

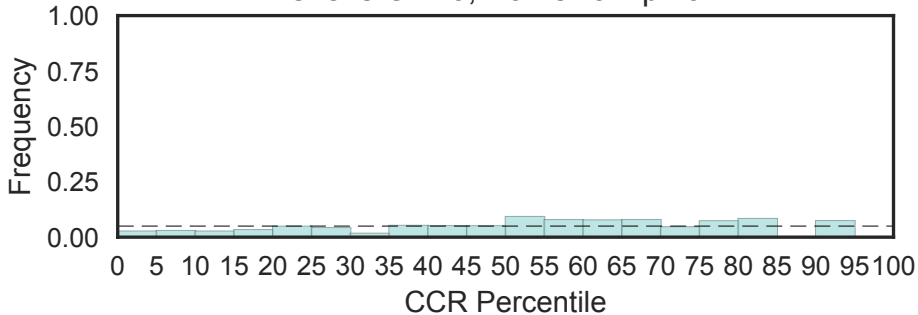

DALR anticodon binding domain  
(DALR\_1, N=3)

Fisher's OR: 0; Bonferroni p-val: 1

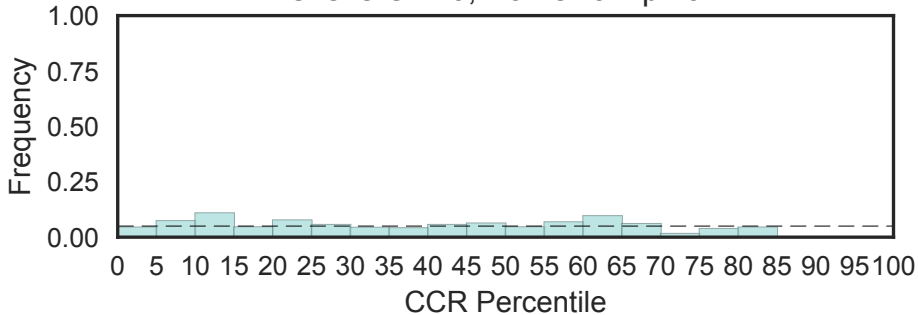

DAN domain  
(DAN, N=8)

Fisher's OR: 0.322; Bonferroni p-val: 1

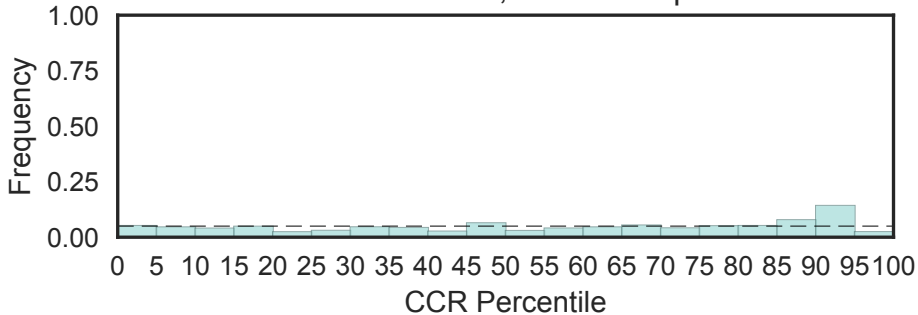

FAD dependent oxidoreductase  
(DAO, N=12)

Fisher's OR: 0.17; Bonferroni p-val: 1

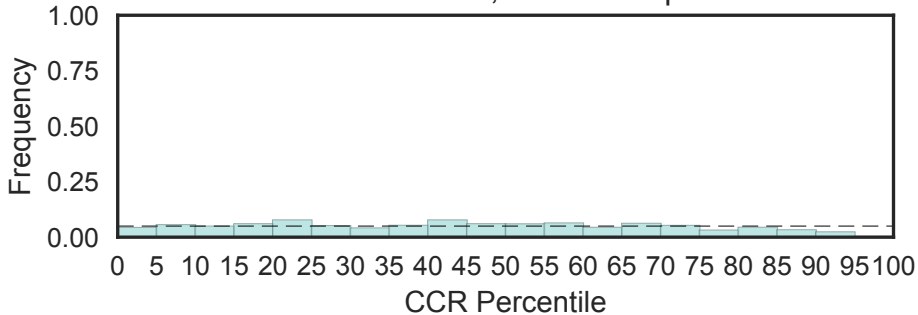

# D-amino acid oxidase activator (DAOA, N=1)

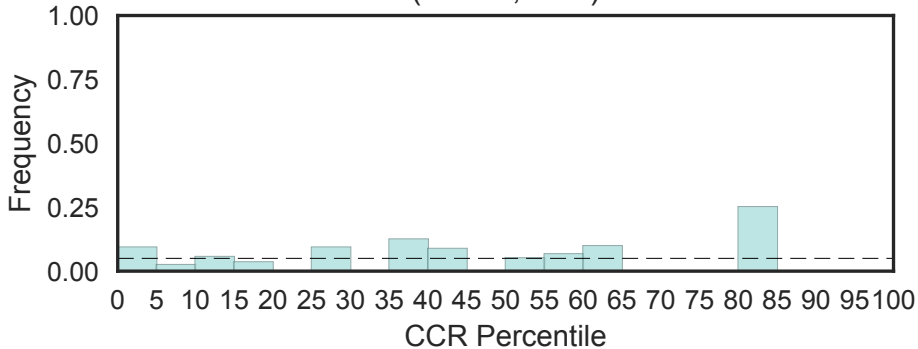

C-terminal domain of alpha-glycerophosphate oxidase  
(DAO\_C, N=1)

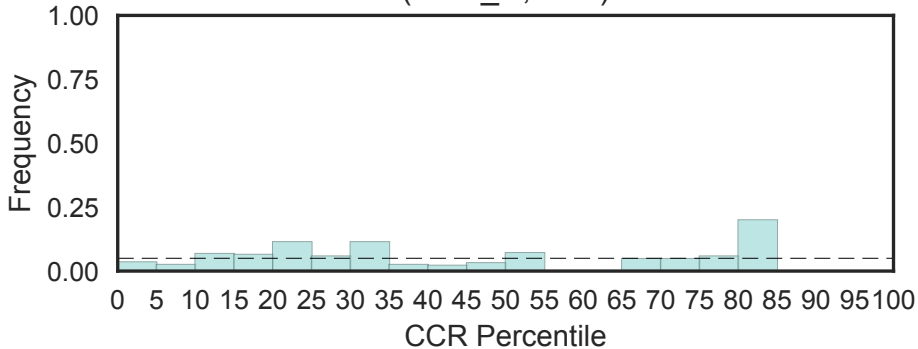

Death-associated protein  
(DAP, N=3)

Fisher's OR: 0; Bonferroni p-val: 1

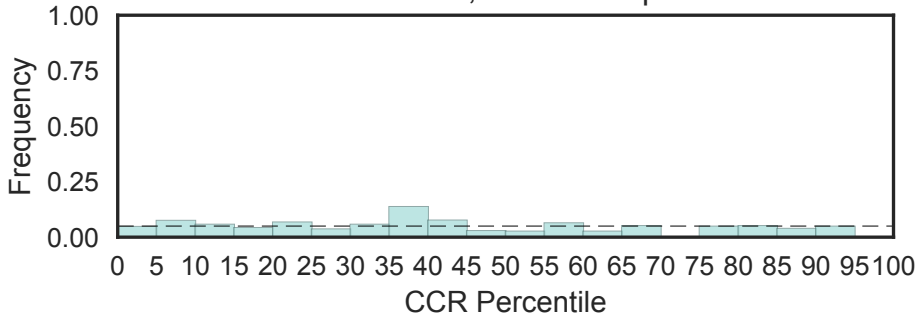



DAP10 membrane protein  
(DAP10, N=2)

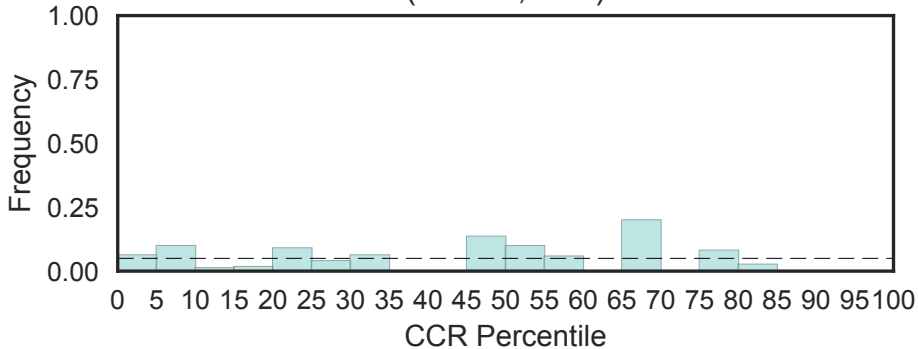

# Mitochondrial ribosomal death-associated protein 3 (DAP3, N=1)

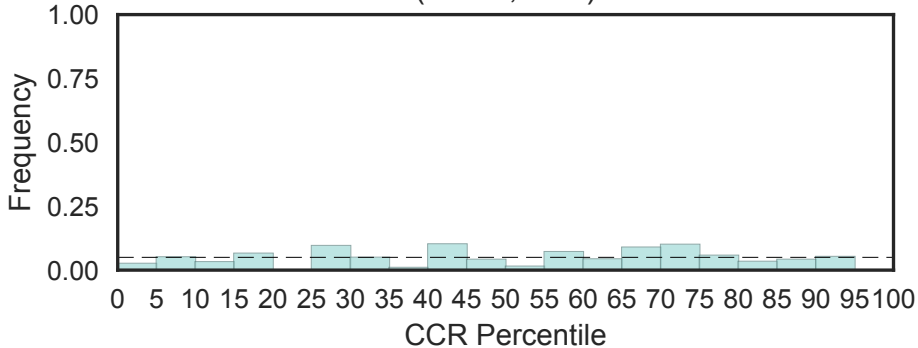

Protein phosphatase inhibitor 1/DARPP-32  
(DARPP-32, N=3)

Fisher's OR: 0.916; Bonferroni p-val: 1

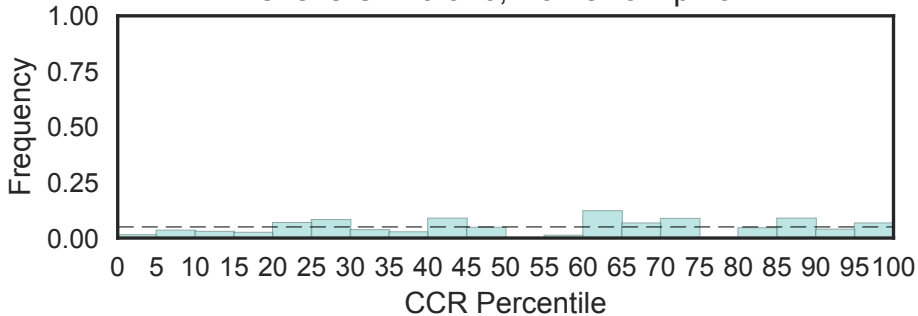

DASH complex subunit Hsk3 like  
(DASH\_Hsk3, N=1)

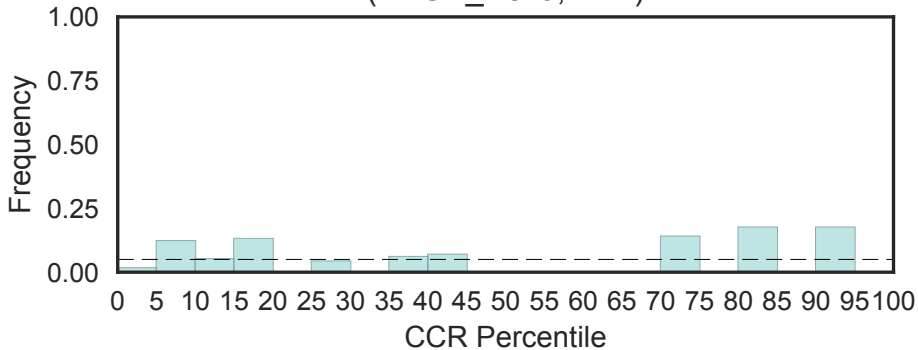

DAZ associated protein 2 (DAZAP2)  
(DAZAP2, N=1)

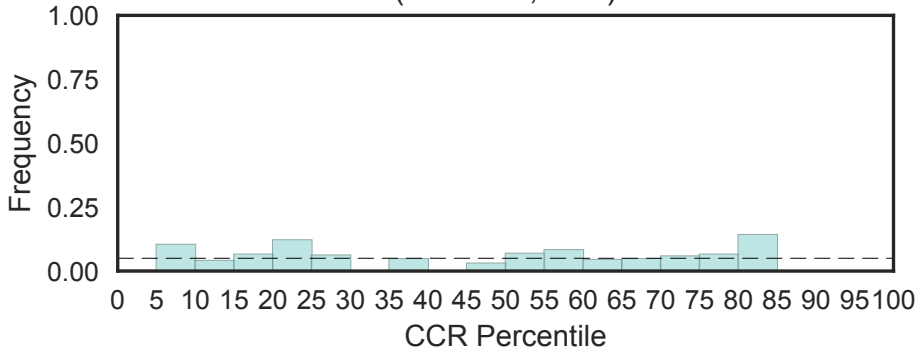

Dof, BCAP, and BANK (DBB) motif,  
(DBB, N=2)

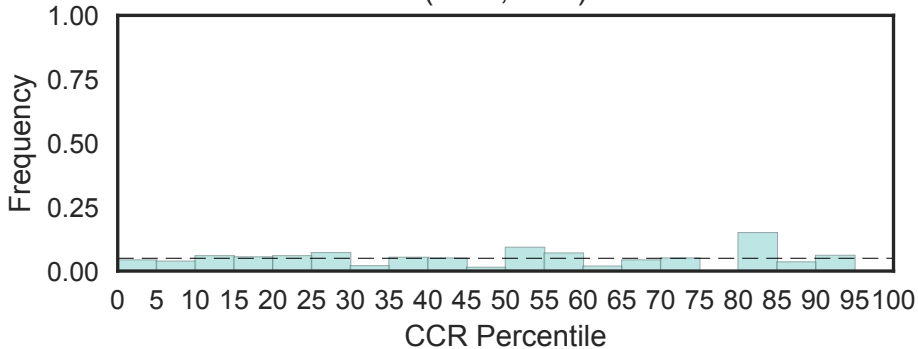

DBC1  
(DBC1, N=2)

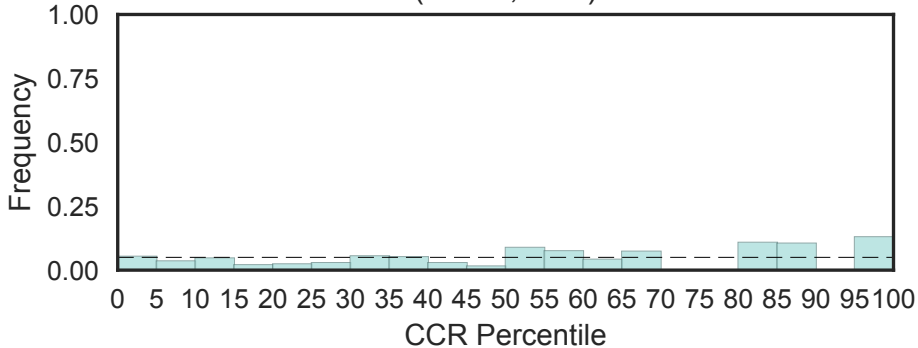

DNA-binding domain  
(DBINO, N=2)

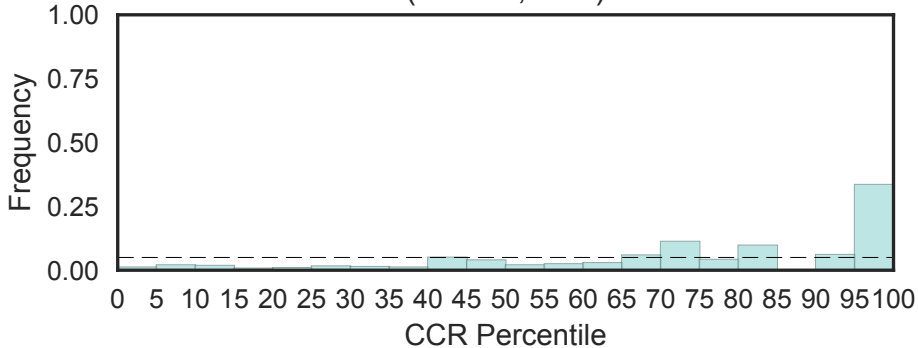



DBP10CT (NUC160) domain  
(DBP10CT, N=1)

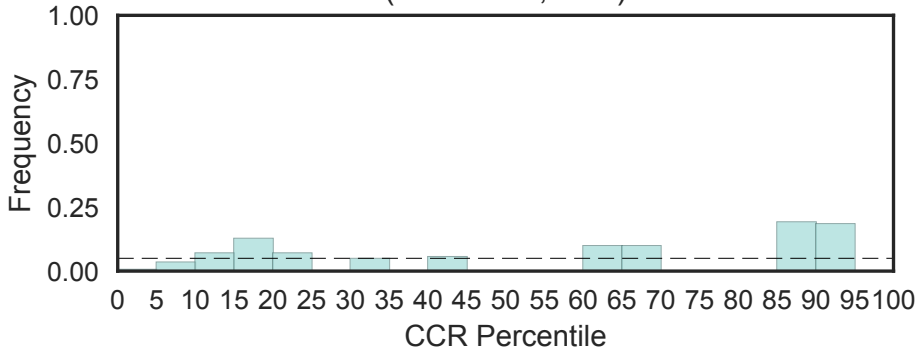

Lariat debranching enzyme, C-terminal domain  
(DBR1, N=1)

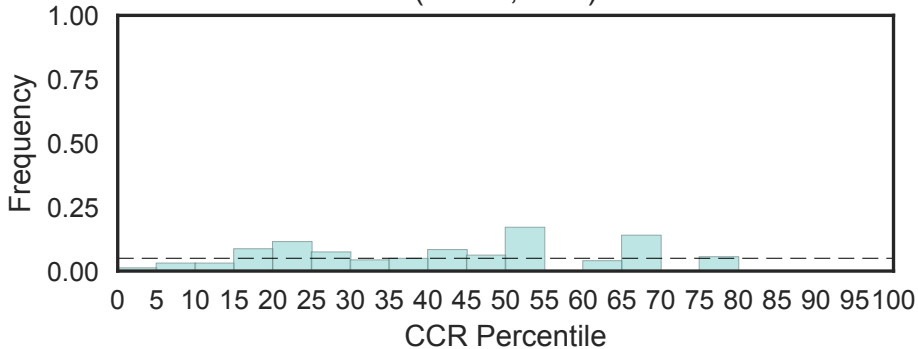

DDB1- and CUL4-associated factor 16  
(DCA16, N=1)

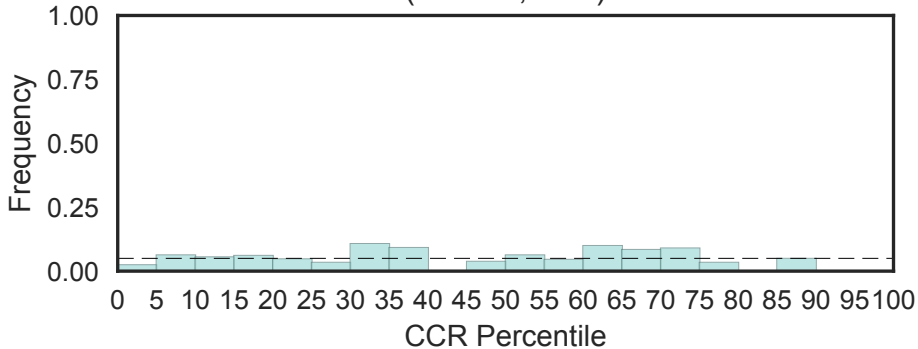

DDB1-and CUL4-substrate receptor 15, WD repeat  
(DCAF15\_WD40, N=1)

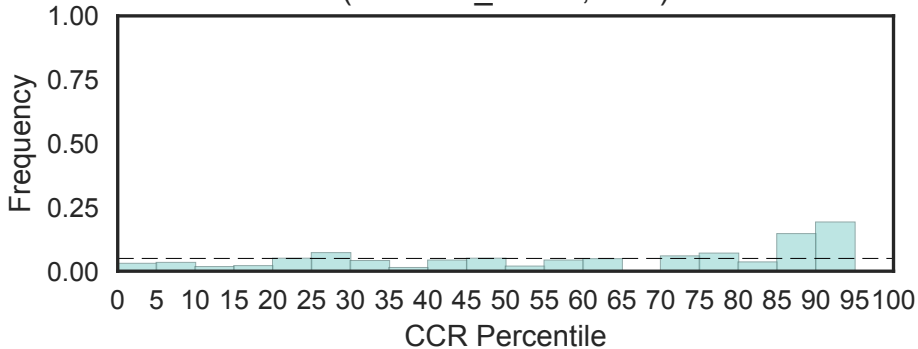

DDB1- and CUL4-associated factor 17  
(DCAF17, N=1)

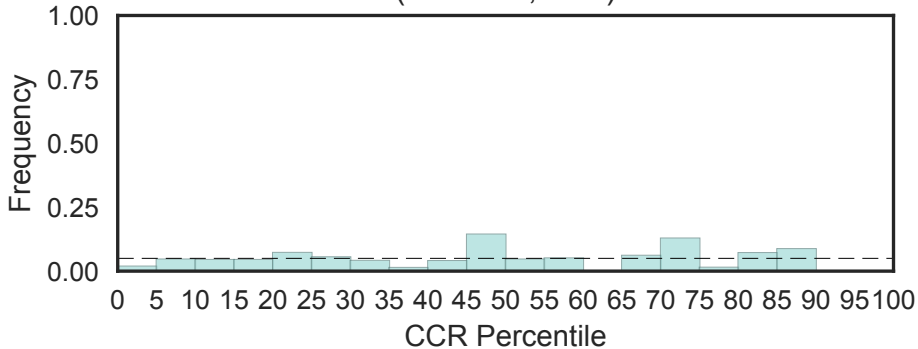

Dimerisation and cyclophilin-binding domain of Mon2  
(DCB, N=5)

Fisher's OR: 0.822; Bonferroni p-val: 1

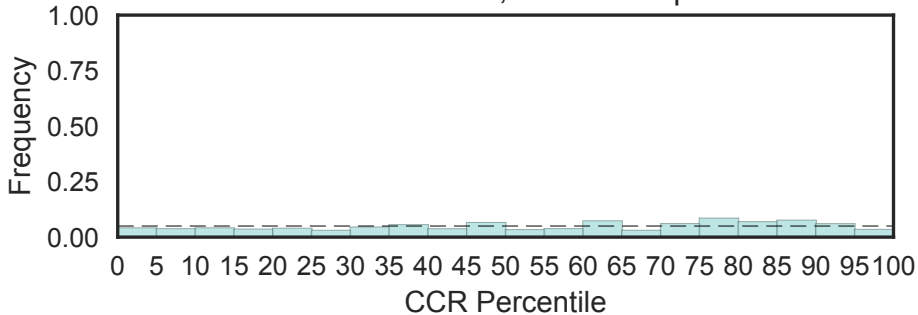

Dcp1-like decapping family  
(DCP1, N=3)

Fisher's OR: 7.59; Bonferroni p-val: 1

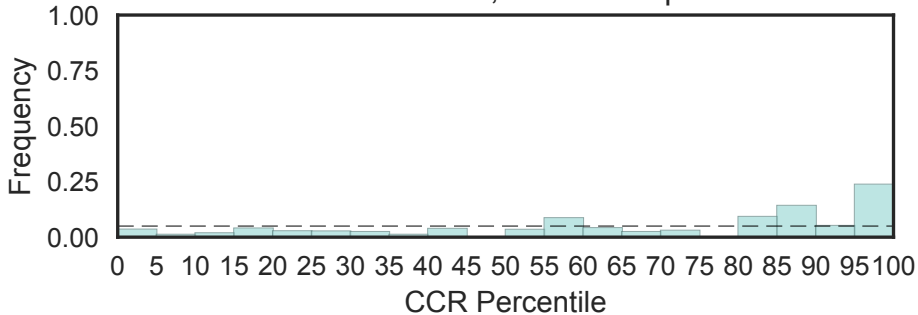

Dcp2, box A domain  
(DCP2, N=1)

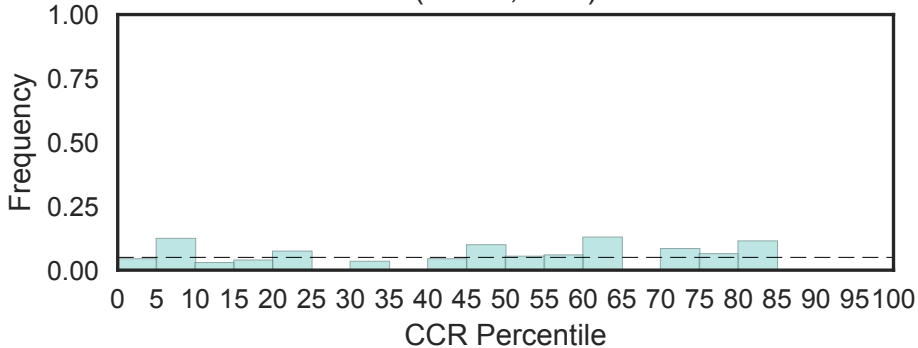



Dppa2/4 conserved region  
(DCR, N=2)

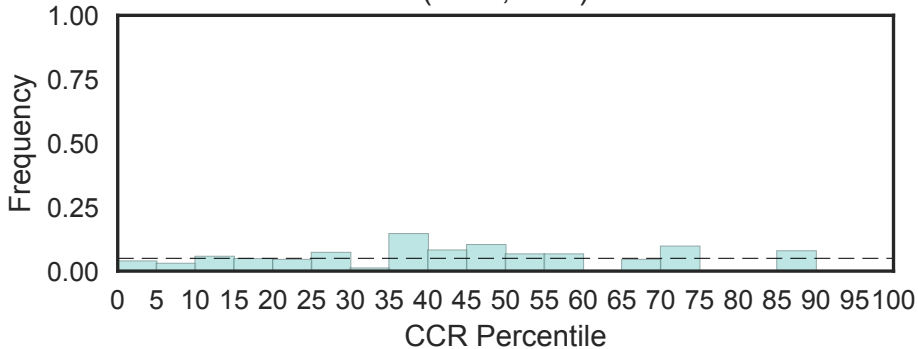

Doublecortin  
(DCX, N=13)

Fisher's OR: 1.13; Bonferroni p-val: 1

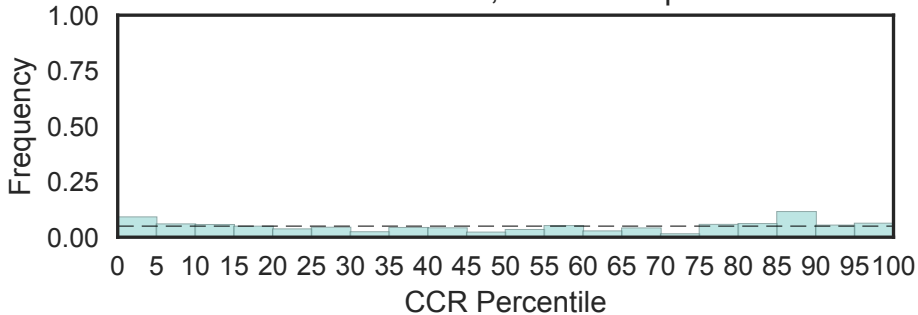

DC-STAMP-like protein  
(DC\_STAMP, N=4)

Fisher's OR: 0; Bonferroni p-val: 1

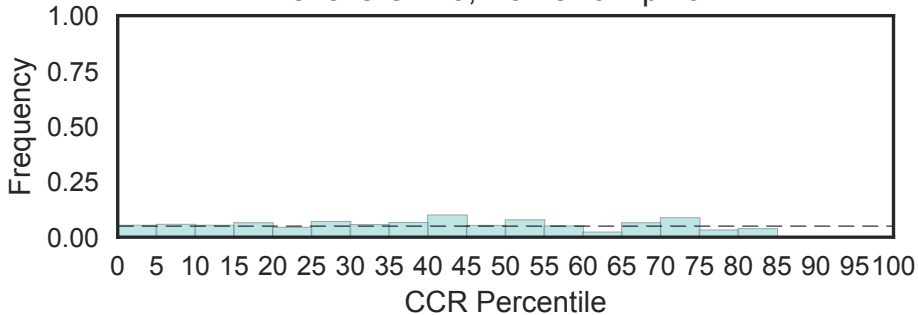

Det1 complexing ubiquitin ligase  
(DDA1, N=1)

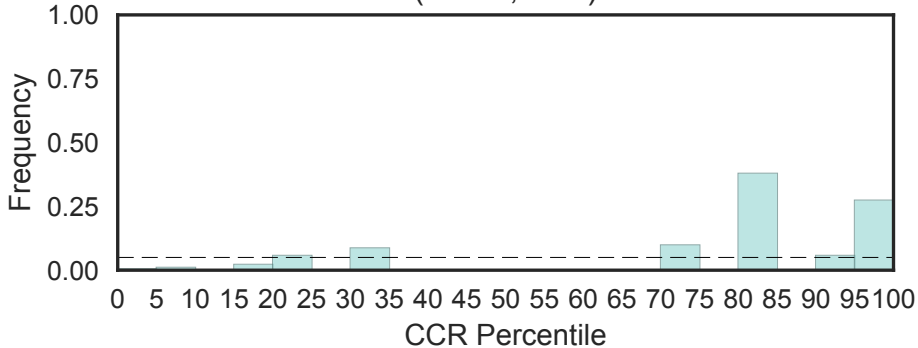

Putative mitochondrial precursor protein  
(DDDD, N=1)

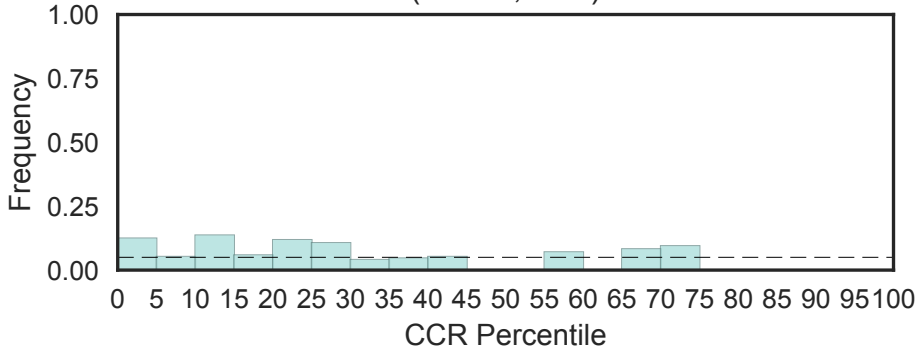

DDE superfamily endonuclease  
(DDE\_1, N=13)

Fisher's OR: 1.74; Bonferroni p-val: 1

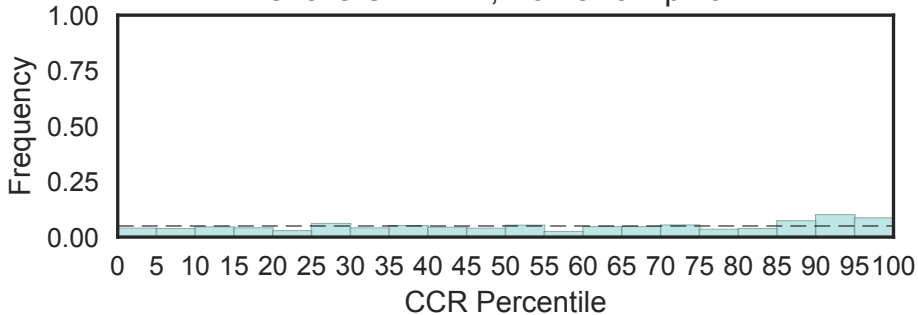

Transposase IS4  
(DDE\_Tnp\_1\_7, N=6)

Fisher's OR: 0.269; Bonferroni p-val: 1

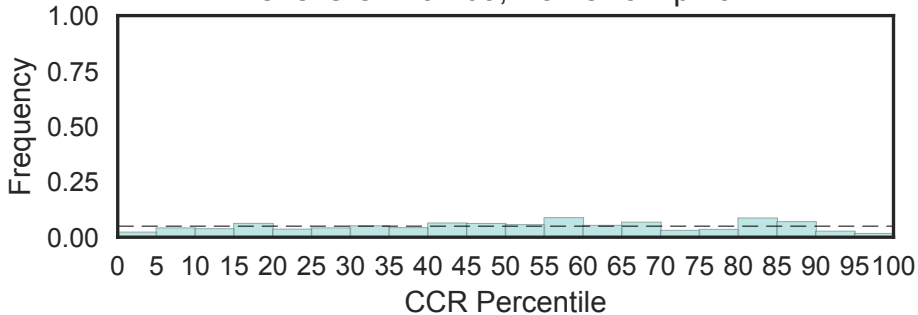

DDE superfamily endonuclease  
(DDE\_Tnp\_4, N=1)

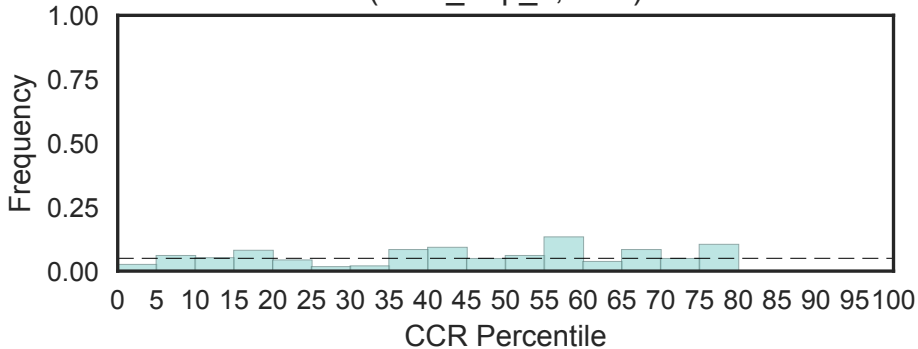



DDHD domain  
(DDHD, N=6)

Fisher's OR: 1.65; Bonferroni p-val: 1

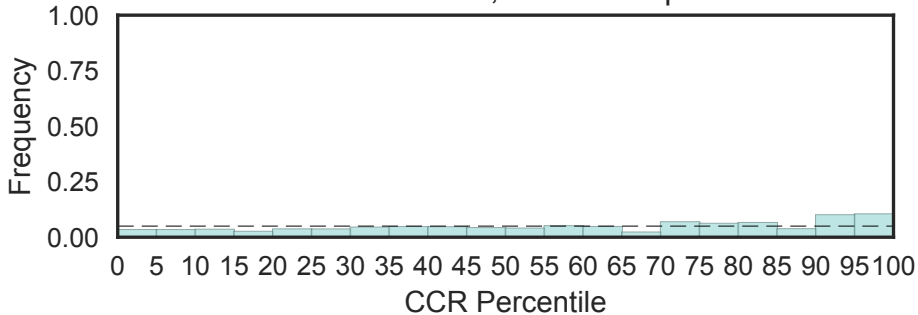

Oligosaccharyltransferase 48 kDa subunit beta  
(DDOST\_48kD, N=1)

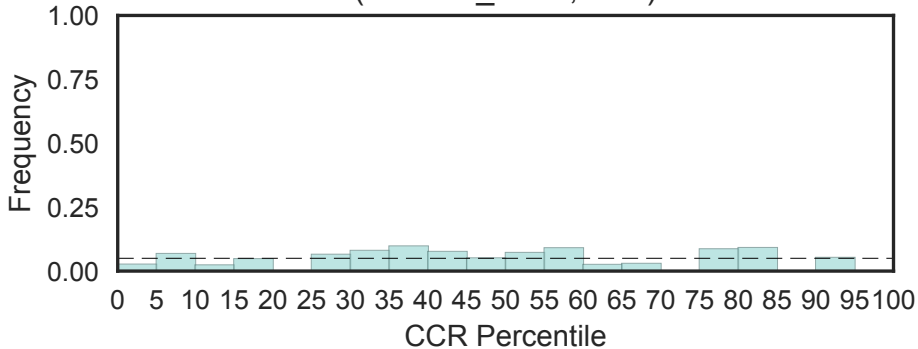

DDRGK domain  
(DDRGK, N=1)

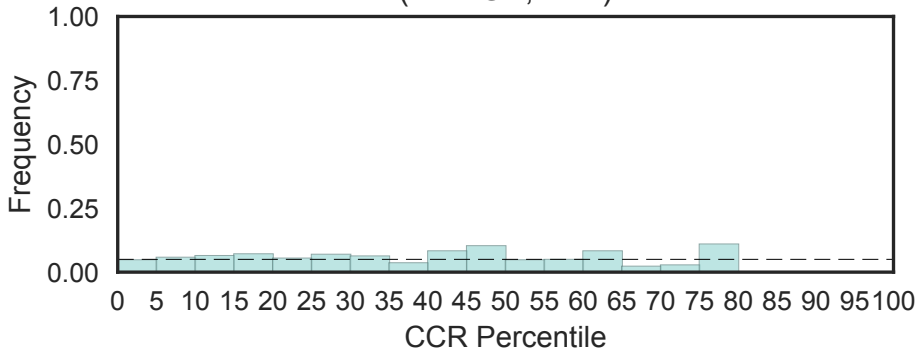

DDT domain  
(DDT, N=4)

Fisher's OR: 5.59; Bonferroni p-val: 1

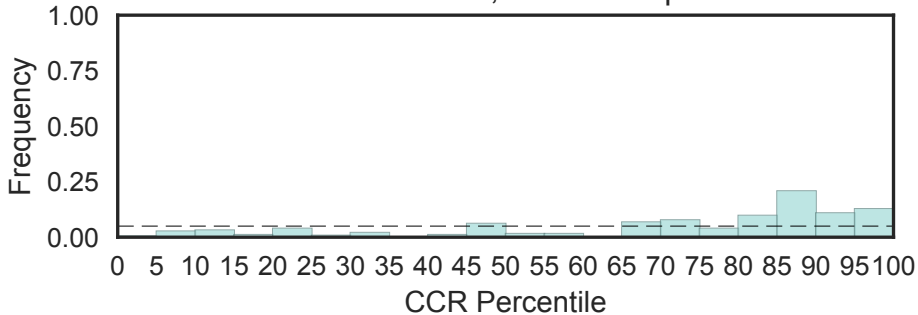

DEAD/DEAH box helicase  
(DEAD, N=77)

Fisher's OR: 2.25; Bonferroni p-val: 6.03e-07

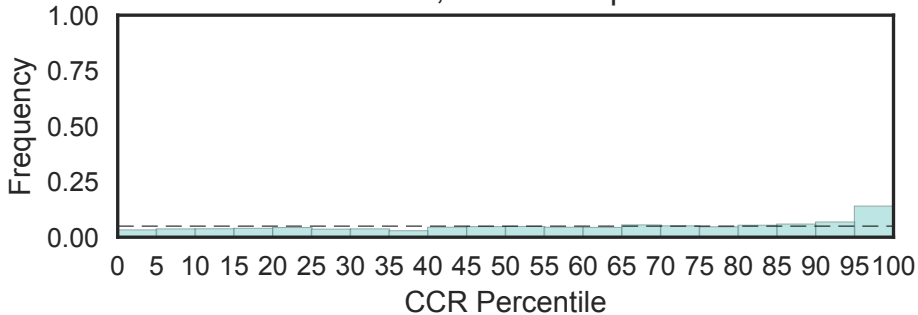

DEAD\_2

(DEAD\_2, N=4)

Fisher's OR: 0; Bonferroni p-val: 1

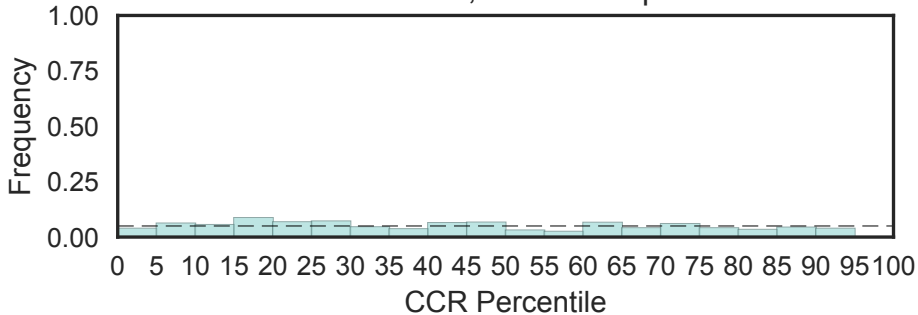

Deleted in esophageal cancer 1 family  
(DEC1, N=1)

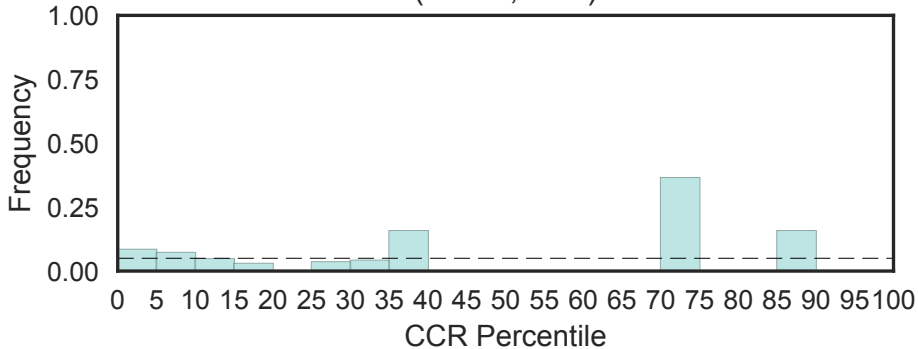

Death effector domain  
(DED, N=11)

Fisher's OR: 2.86; Bonferroni p-val: 1

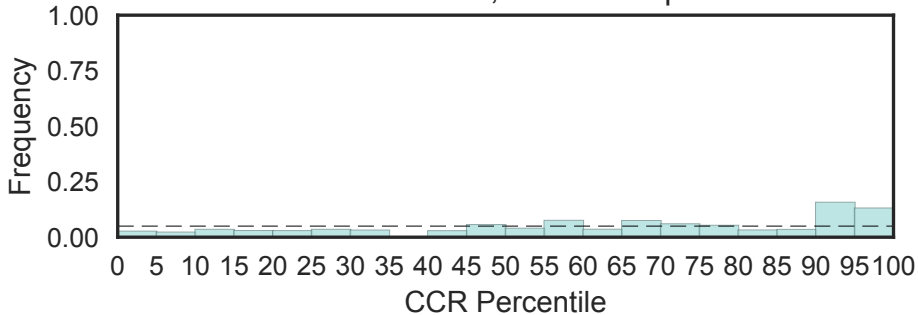



Beta-defensin 136  
(DEFB136, N=1)

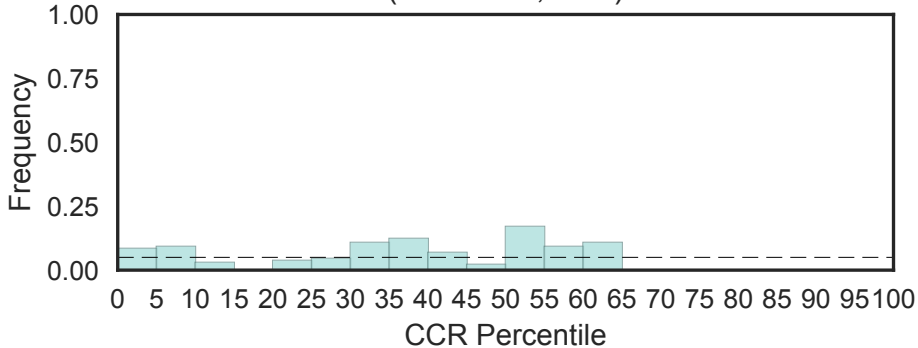

DEK C terminal domain  
(DEK\_C, N=4)

Fisher's OR: 1.8; Bonferroni p-val: 1

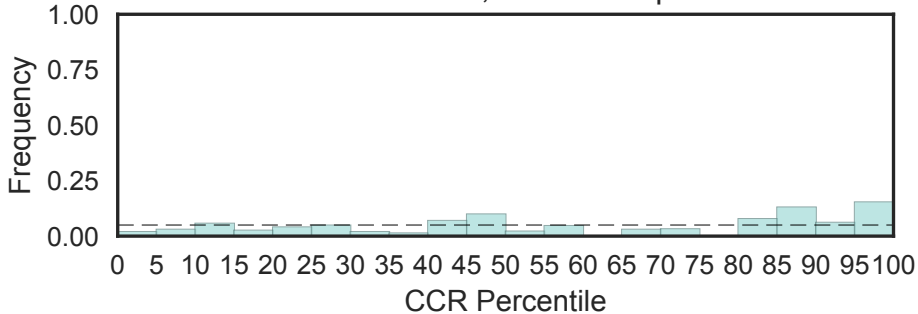

DENN (AEX-3) domain  
(DENN, N=17)

Fisher's OR: 1.69; Bonferroni p-val: 1

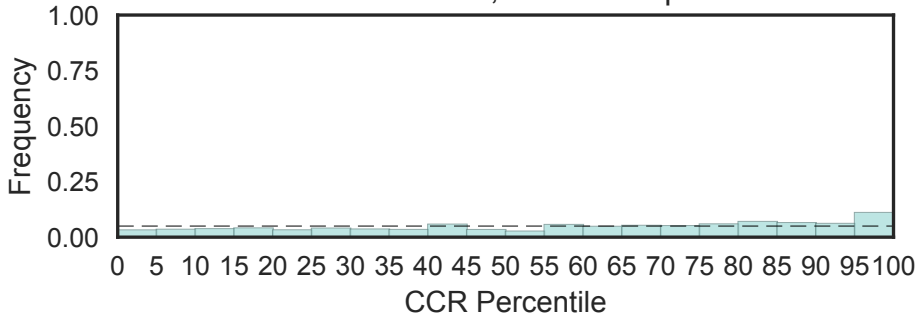

Domain found in Dishevelled, Egl-10, and Pleckstrin (DEP)  
(DEP, N=24)

Fisher's OR: 0.323; Bonferroni p-val: 1

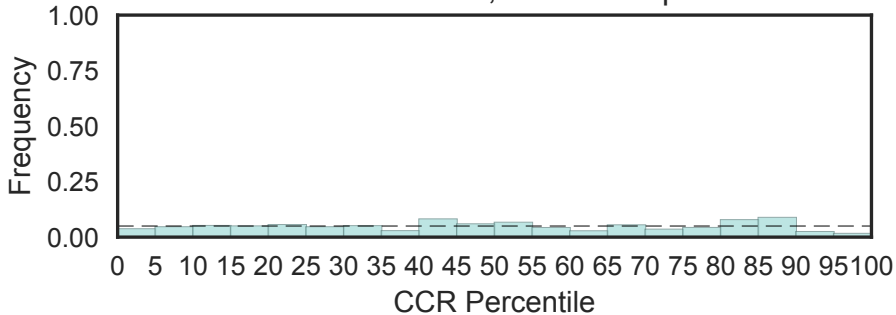

# Decidual protein induced by progesterone family (DEPP, N=1)

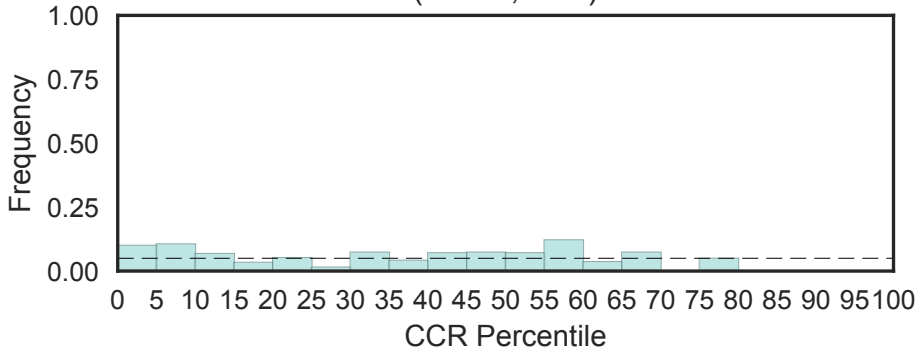

Der1-like family  
(DER1, N=3)

Fisher's OR: 0.522; Bonferroni p-val: 1

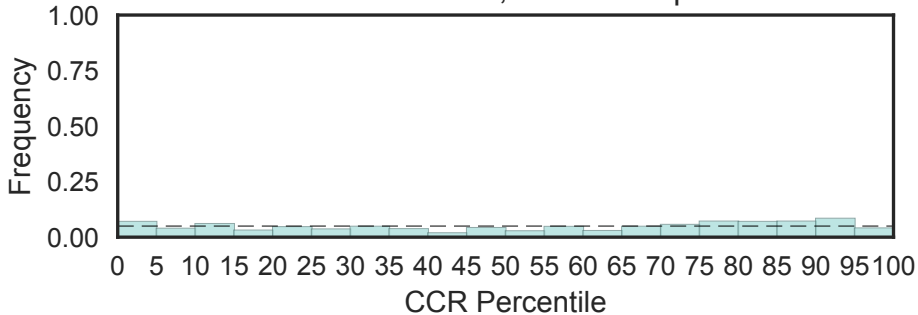

Dermatopontin  
(DERM, N=1)

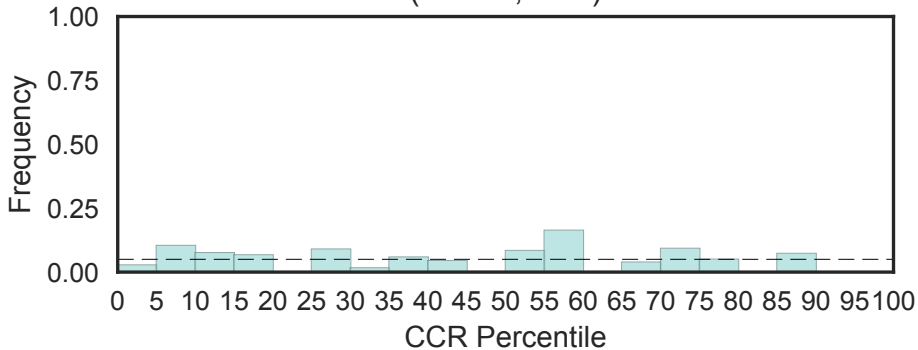

DNA Fragmentation factor 45kDa, C terminal domain  
(DFF-C, N=1)

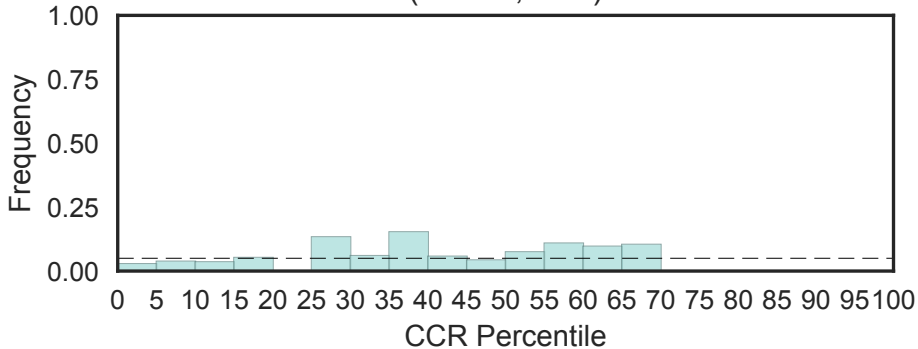



DNA fragmentation factor 40 kDa  
(DFF40, N=1)

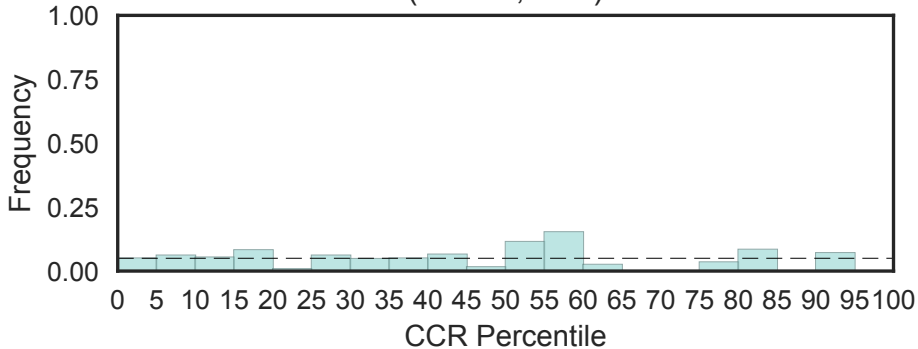

DNA / pantothenate metabolism flavoprotein  
(DFP, N=2)

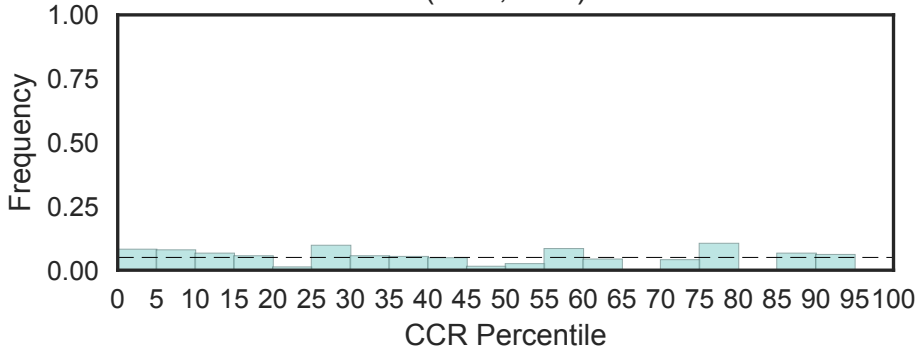

# DRG Family Regulatory Proteins, Tma46 (DFRP\_C, N=2)

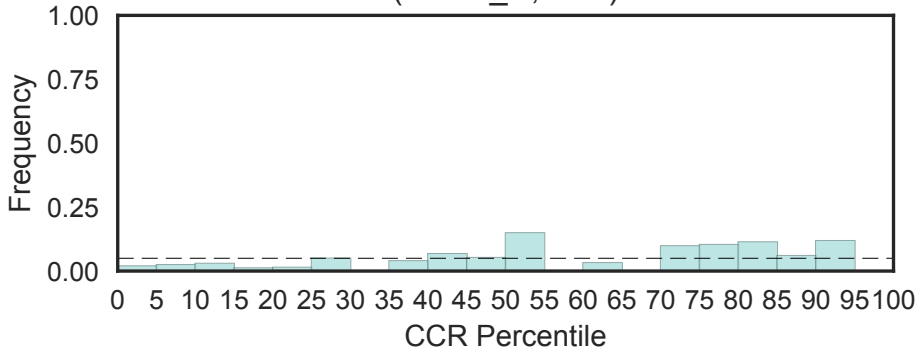

Dynein heavy chain, N-terminal region 1  
(DHC\_N1, N=11)

Fisher's OR: 0.515; Bonferroni p-val: 1

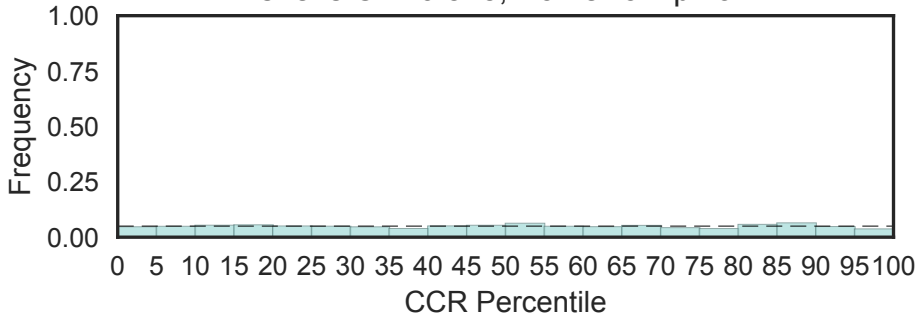

Dynein heavy chain, N-terminal region 2  
(DHC\_N2, N=16)

Fisher's OR: 0.432; Bonferroni p-val: 1

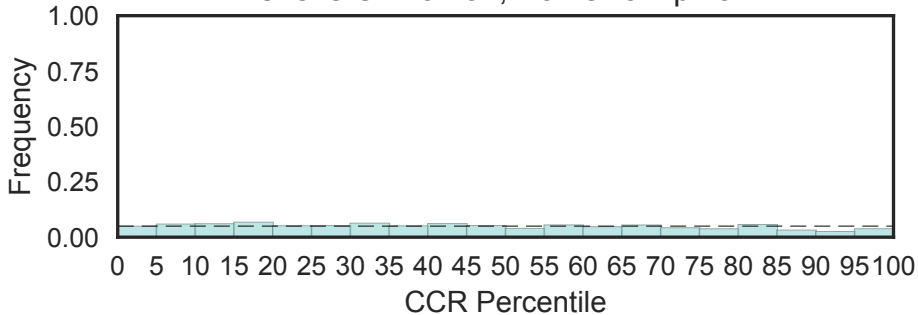

Dihydrodipicolinate synthetase family  
(DHDPS, N=4)

Fisher's OR: 0; Bonferroni p-val: 1

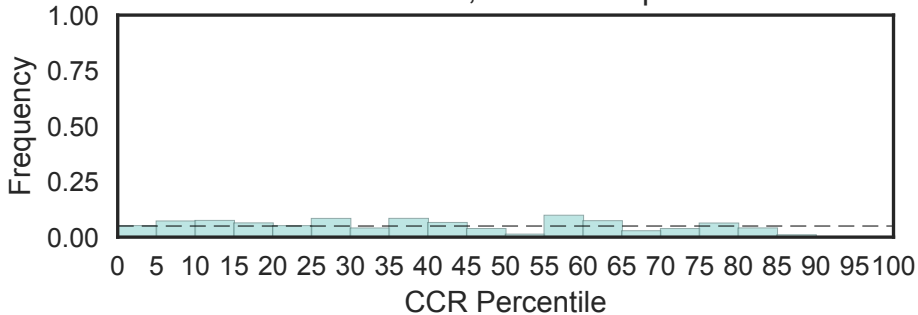

Dihydrofolate reductase  
(DHFR\_1, N=3)

Fisher's OR: 0; Bonferroni p-val: 1

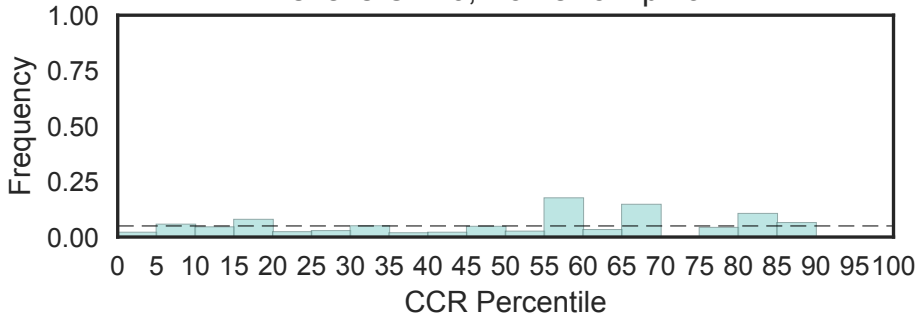

DHH family  
(DHH, N=1)

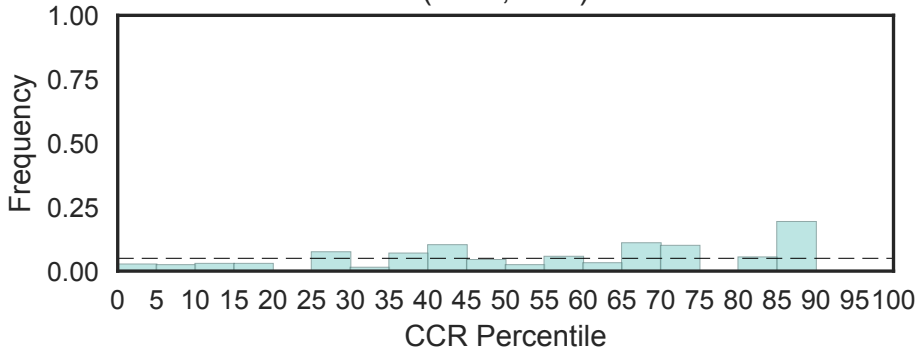



DHHA1 domain  
(DHHA1, N=1)

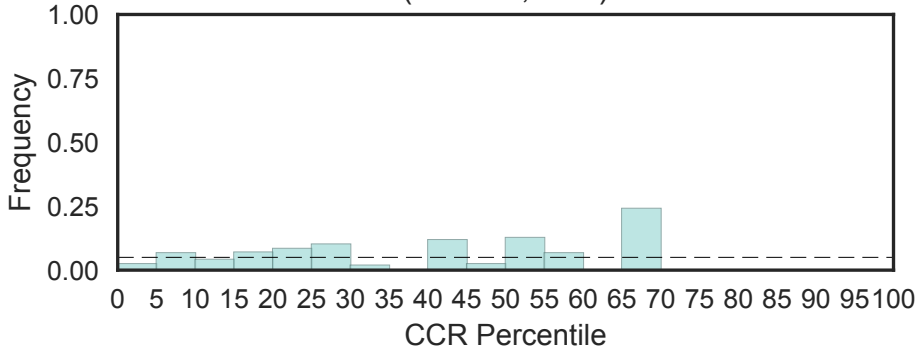

DHHA2 domain  
(DHHA2, N=2)

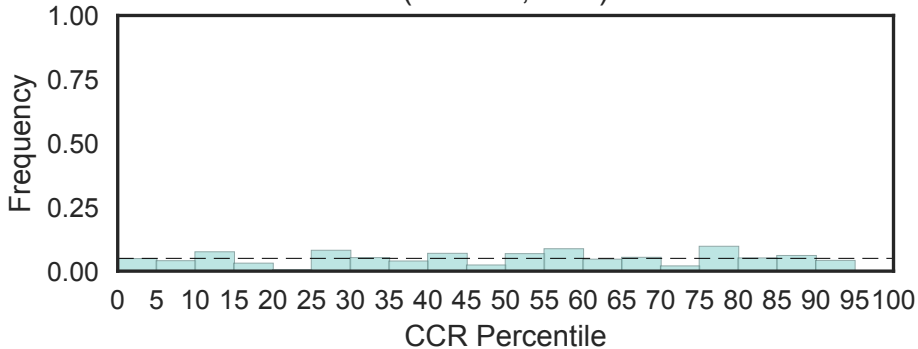

DHHC palmitoyltransferase  
(DHHC, N=21)

Fisher's OR: 2.23; Bonferroni p-val: 1

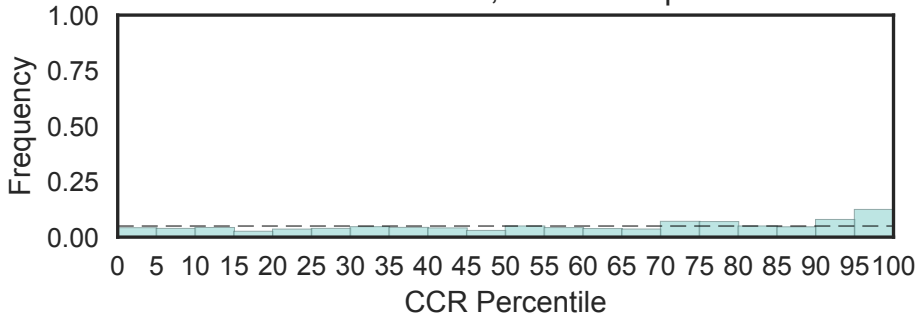

Dihydroorotate dehydrogenase  
(DHO\_dh, N=2)

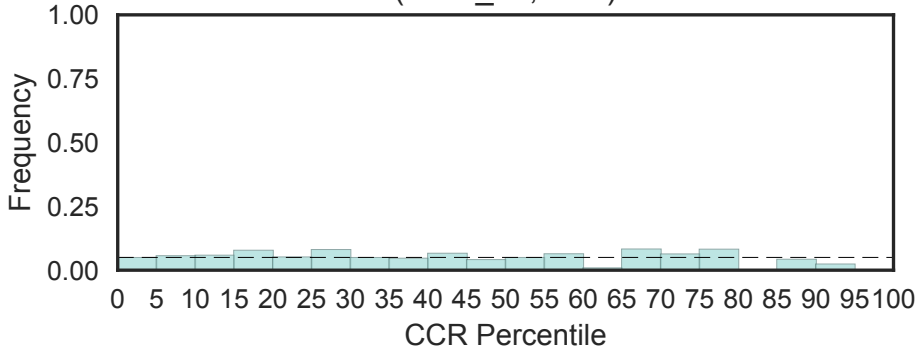

Dock homology region 2  
(DHR-2, N=15)

Fisher's OR: 1.64; Bonferroni p-val: 1

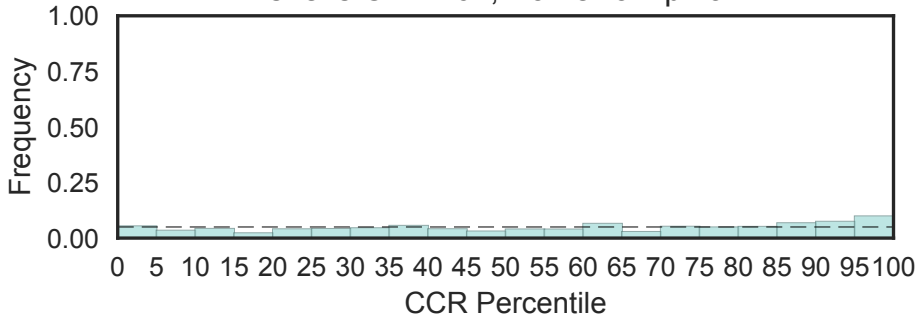

DIL domain  
(DIL, N=6)

Fisher's OR: 2.21; Bonferroni p-val: 1

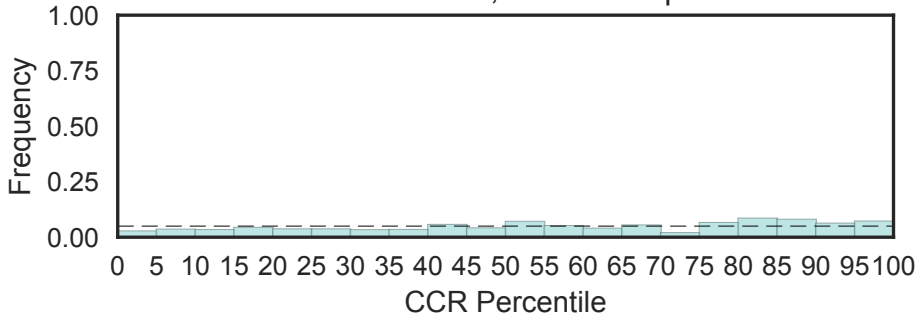

# Mitosis protein DIM1

(DIM1, N=4)

Fisher's OR: 4; Bonferroni p-val: 1

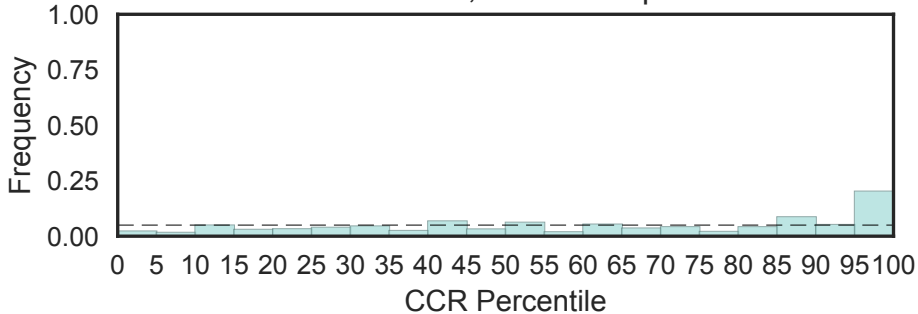

# DIRP (DIRP, N=1)

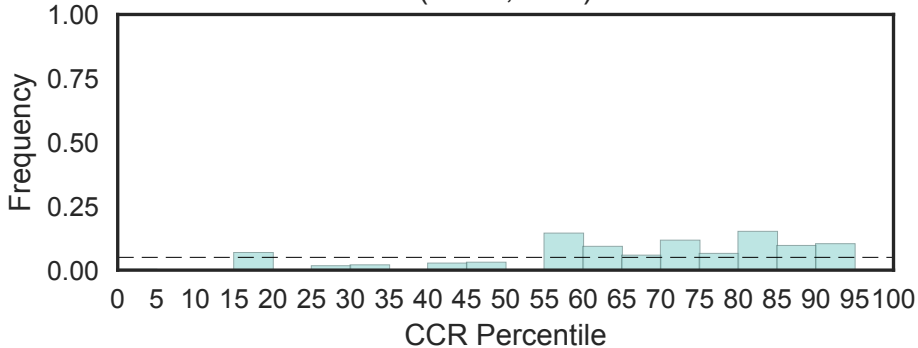



DIX domain  
(DIX, N=6)

Fisher's OR: 0; Bonferroni p-val: 1

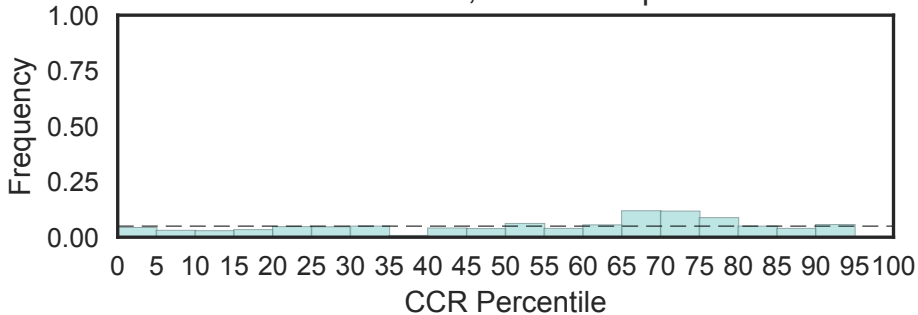

DJ-1/Pfpl family  
(DJ-1\_Pfpl, N=1)

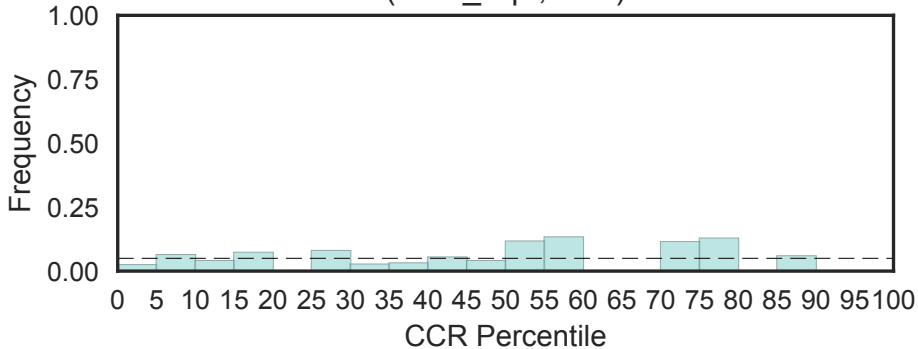

# Death-like domain of SPT6 (DLD, N=1)

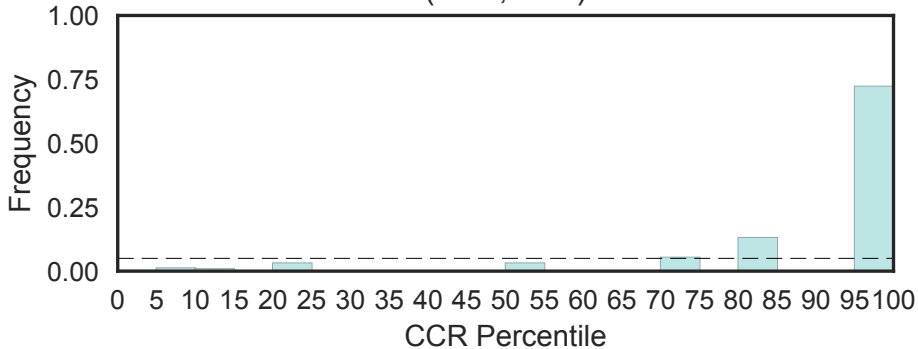

# Leukemia-associated protein 7 (DLEU7, N=1)

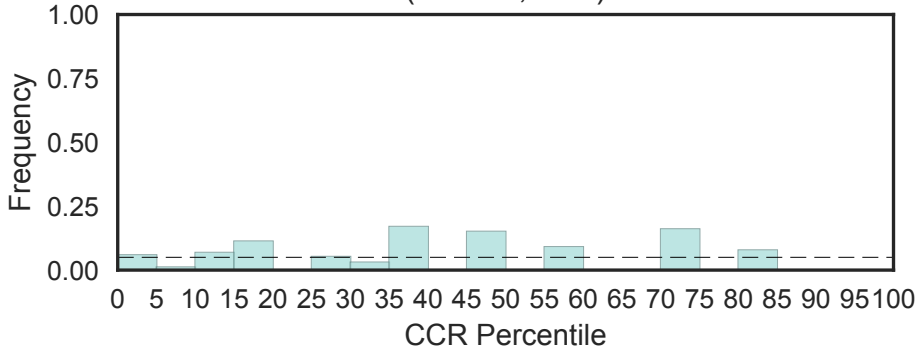

Dienelactone hydrolase family  
(DLH, N=11)

Fisher's OR: 0; Bonferroni p-val: 1

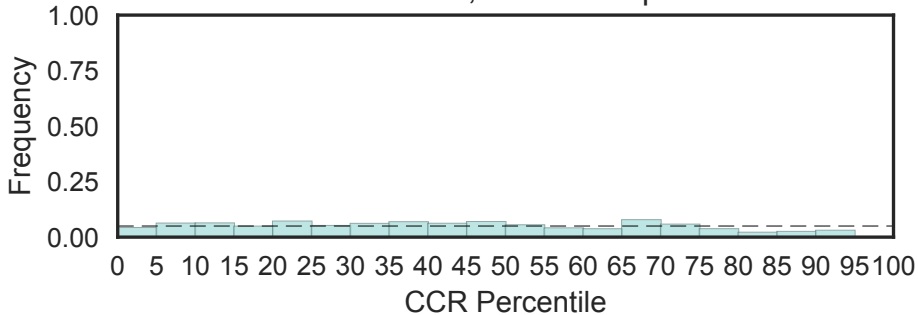

Dynein light intermediate chain (DLIC)  
(DLIC, N=4)

Fisher's OR: 0.563; Bonferroni p-val: 1

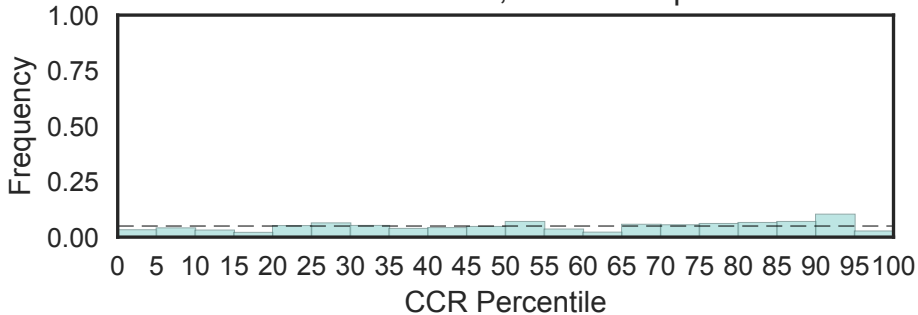

Homeobox protein distal-less-like N terminal  
(DLL\_N, N=3)

Fisher's OR: 0; Bonferroni p-val: 1

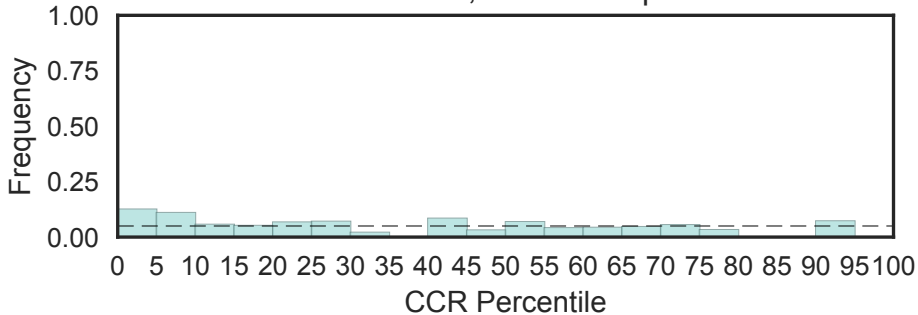

DM DNA binding domain  
(DM, N=7)

Fisher's OR: 3.54; Bonferroni p-val: 1

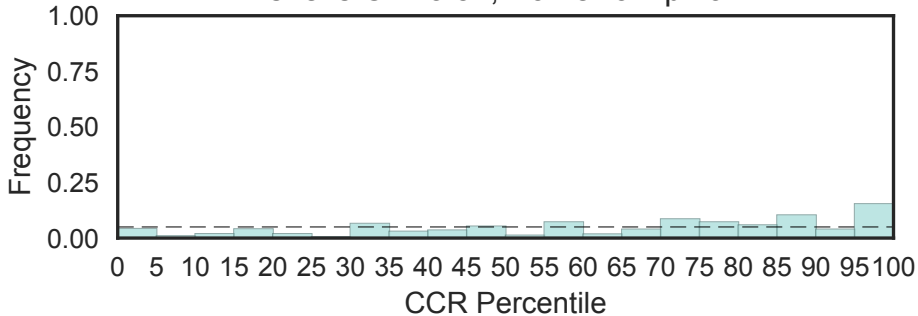



DMRTA motif  
(DMA, N=3)

Fisher's OR: 0; Bonferroni p-val: 1

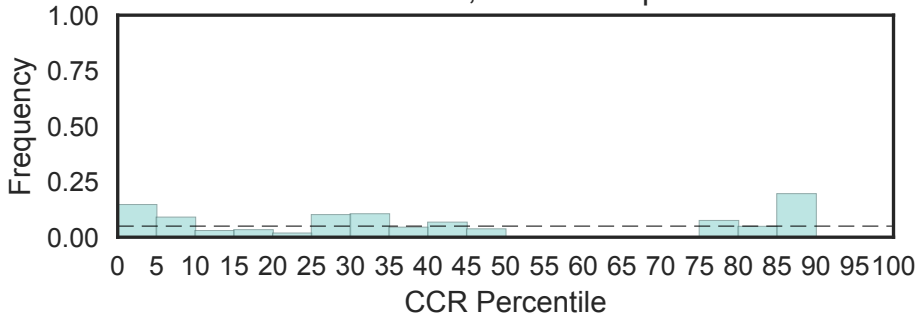

DNA methyltransferase 1-associated protein 1 (DMAP1)  
(DMAP1, N=1)

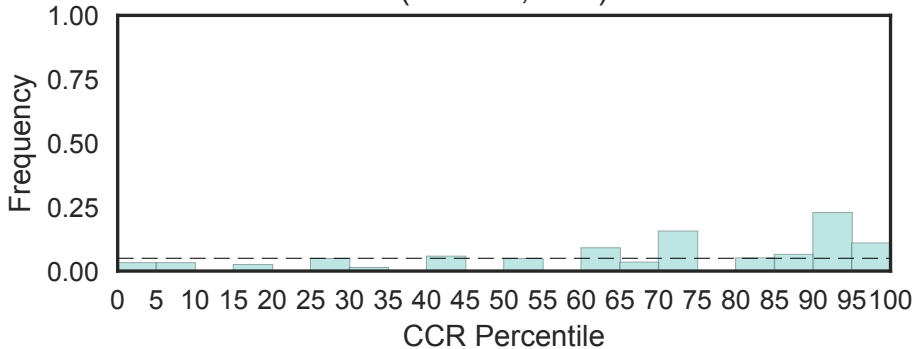

DMAP1-binding Domain  
(DMAP\_binding, N=6)

Fisher's OR: 0.335; Bonferroni p-val: 1

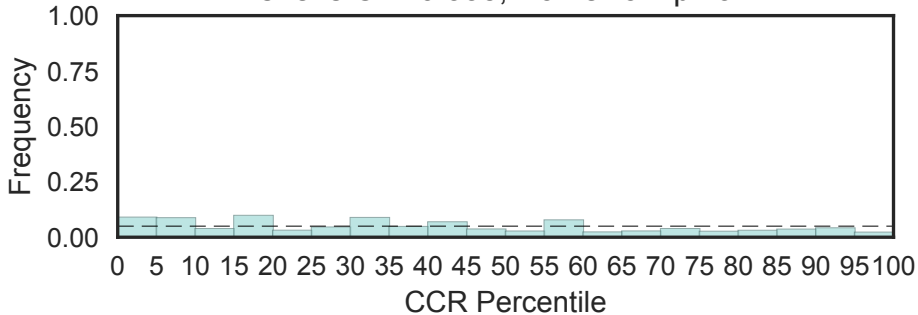

Dentin matrix protein 1 (DMP1)  
(DMP1, N=1)

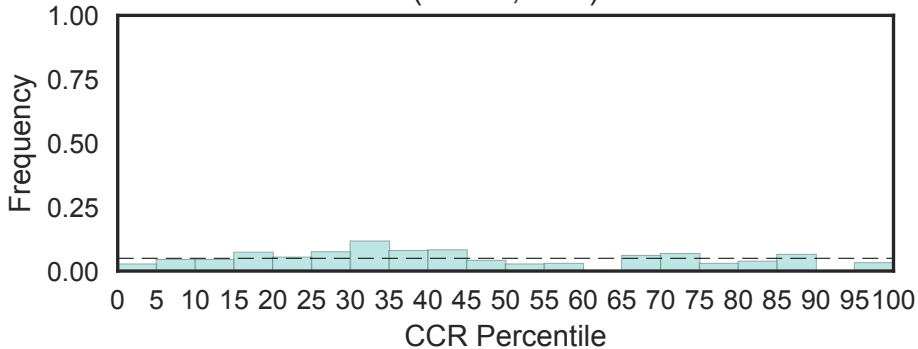

DMPK coiled coil domain like  
(DMPK\_coil, N=4)

Fisher's OR: 1.69; Bonferroni p-val: 1

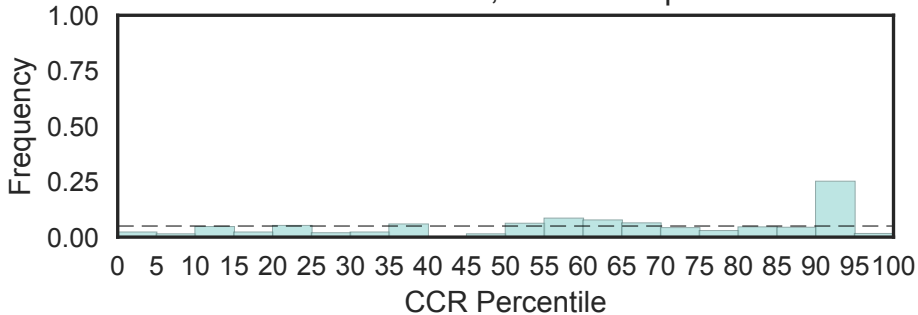

# Doublesex-and mab-3-related transcription factor C1 and C2 (DMRT-like, N=2)

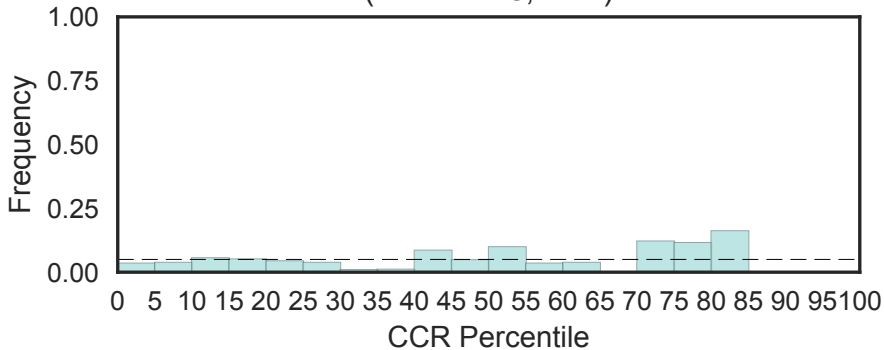

DNA directed RNA polymerase, 7 kDa subunit  
(DNA\_RNApol\_7kD, N=1)

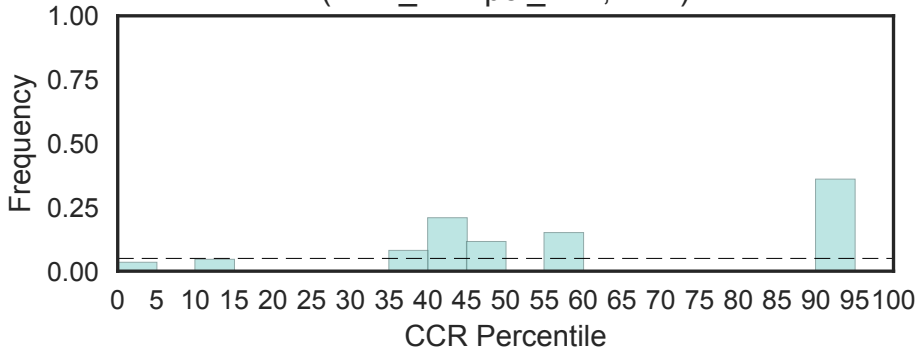

# 6-O-methylguanine DNA methyltransferase, DNA binding domain (DNA\_binding\_1, N=1)

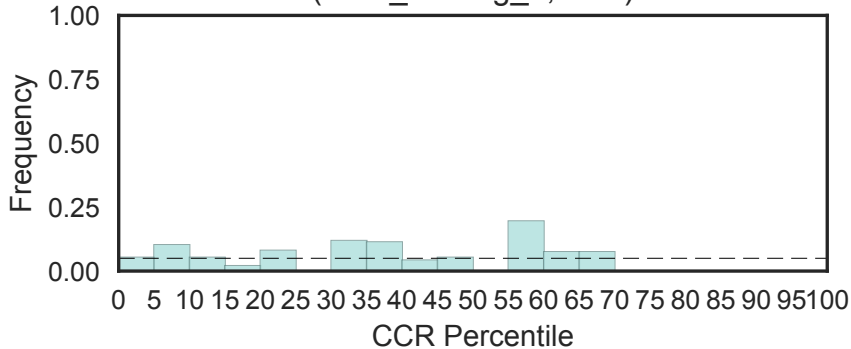



DNA gyrase B  
(DNA\_gyraseB, N=2)

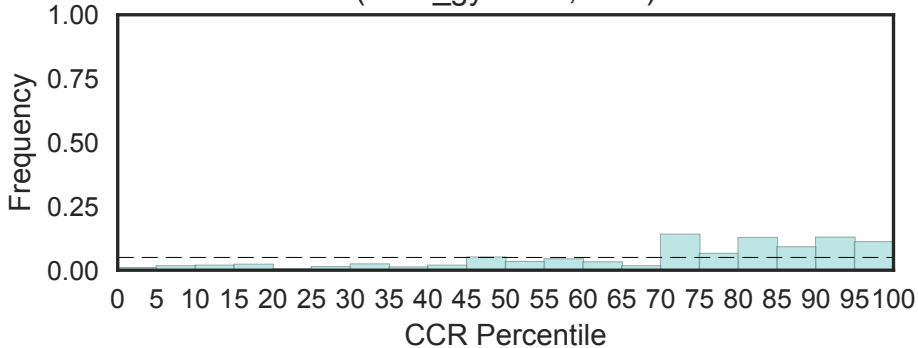

ATP dependent DNA ligase C terminal region  
(DNA\_ligase\_A\_C, N=3)

Fisher's OR: 0; Bonferroni p-val: 1

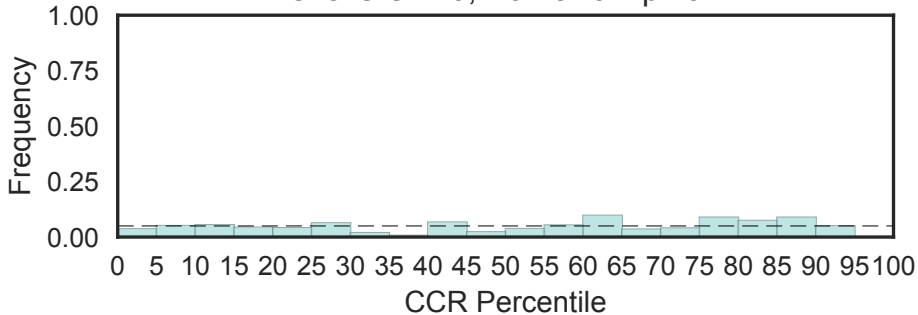

ATP dependent DNA ligase domain  
(DNA\_ligase\_A\_M, N=3)  
Fisher's OR: 0; Bonferroni p-val: 1

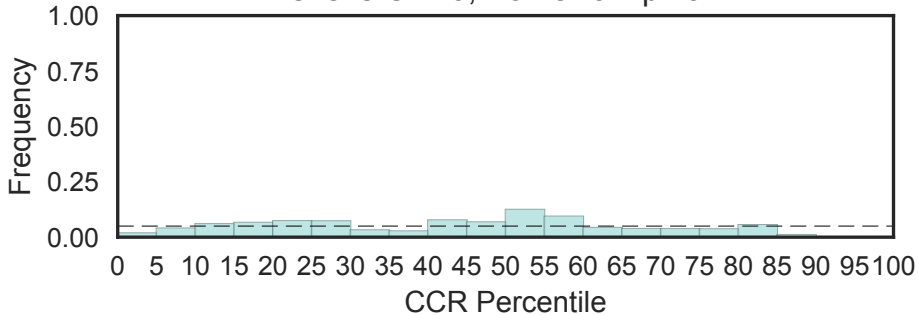

DNA ligase N terminus  
(DNA\_ligase\_A\_N, N=3)  
Fisher's OR: 0; Bonferroni p-val: 1

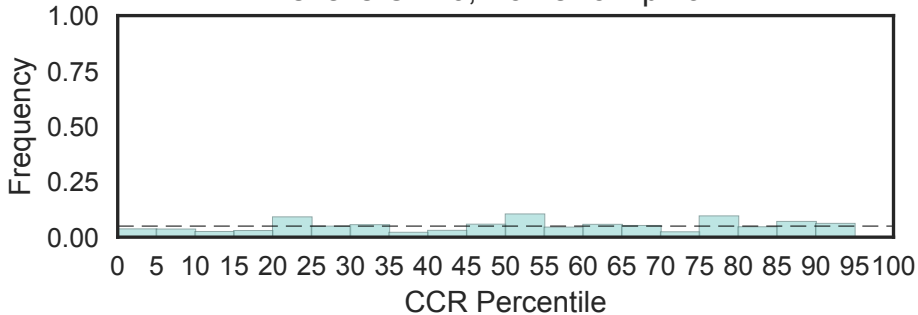

DNA ligase IV  
(DNA\_ligase\_IV, N=1)

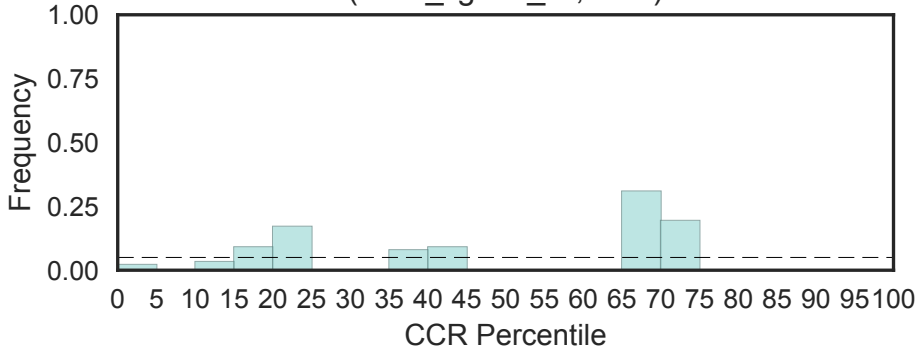

C-5 cytosine-specific DNA methylase  
(DNA\_methylase, N=4)

Fisher's OR: 4.51; Bonferroni p-val: 0.0784

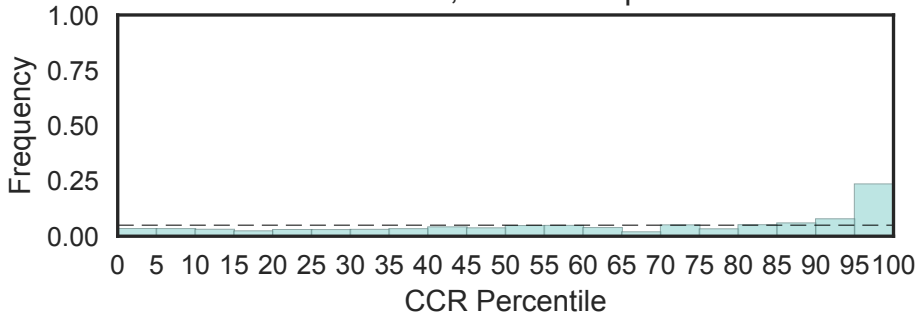

DNA mismatch repair protein, C-terminal domain  
(DNA\_mis\_repair, N=4)

Fisher's OR: 0; Bonferroni p-val: 1

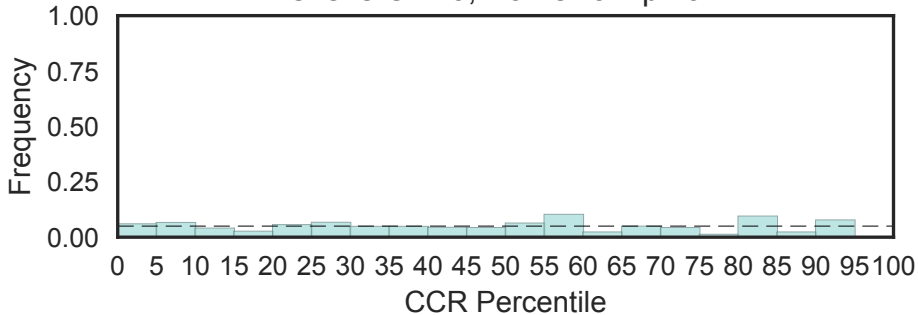

DNA photolyase  
(DNA\_photolyase, N=2)

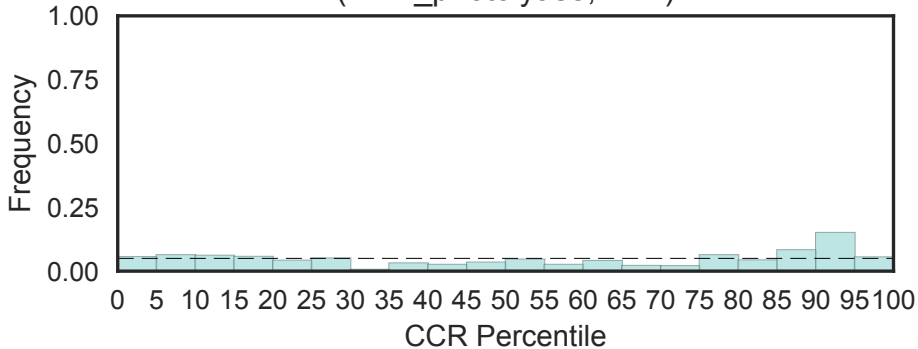



DNA polymerase III, delta subunit  
(DNA\_pol3\_delta2, N=4)  
Fisher's OR: 0; Bonferroni p-val: 1

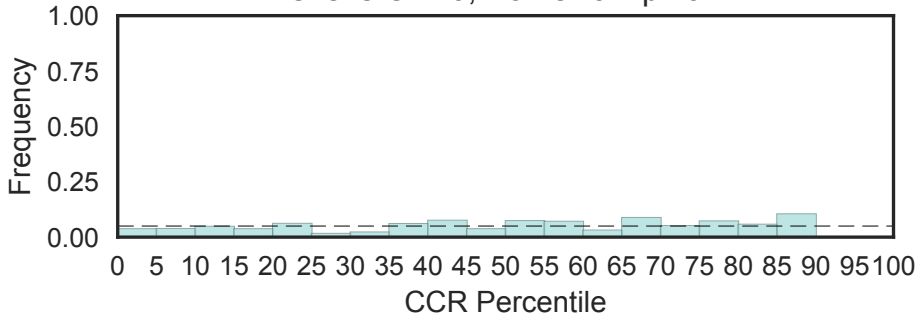

# DNA polymerase family A

(DNA\_pol\_A, N=3)

Fisher's OR: 0; Bonferroni p-val: 1

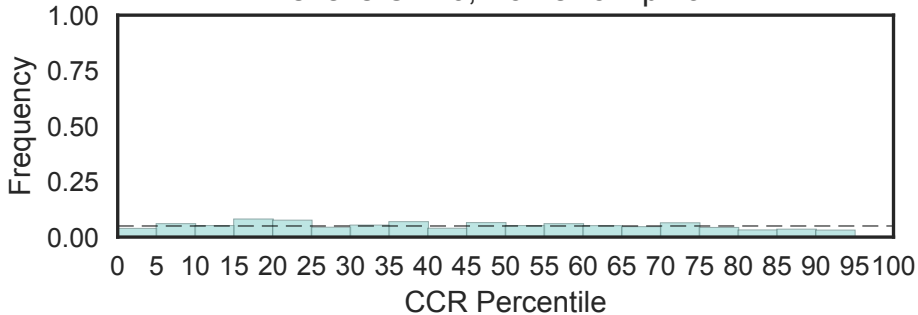

3'-5' exonuclease  
(DNA\_pol\_A\_exo1, N=5)  
Fisher's OR: 0.709; Bonferroni p-val: 1

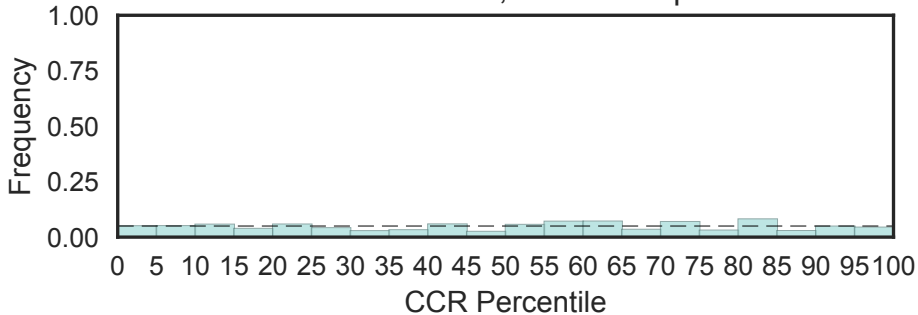

# DNA polymerase family B

(DNA\_pol\_B, N=4)

Fisher's OR: 1.17; Bonferroni p-val: 1

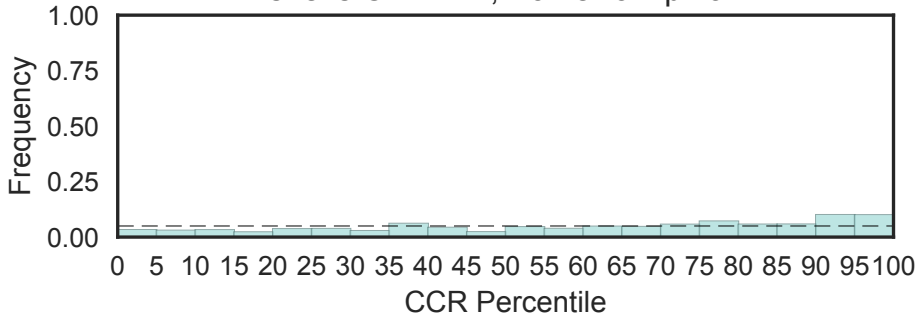

DNA polymerase family B, exonuclease domain  
(DNA\_pol\_B\_exo1, N=4)

Fisher's OR: 1.9; Bonferroni p-val: 1

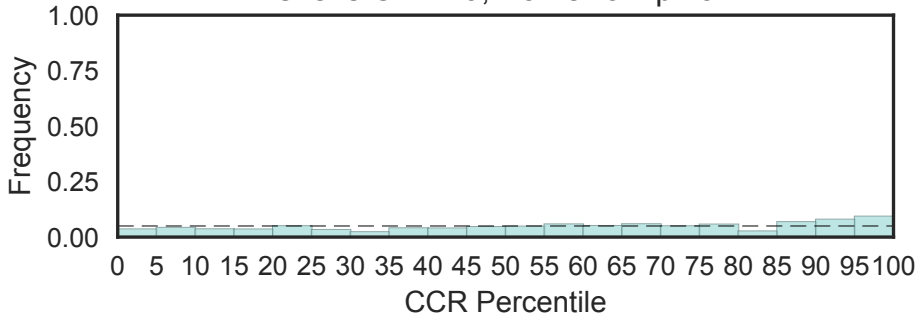

Predicted 3'-5' exonuclease related to the exonuclease domain of PolB  
(DNA\_pol\_B\_exo2, N=1)

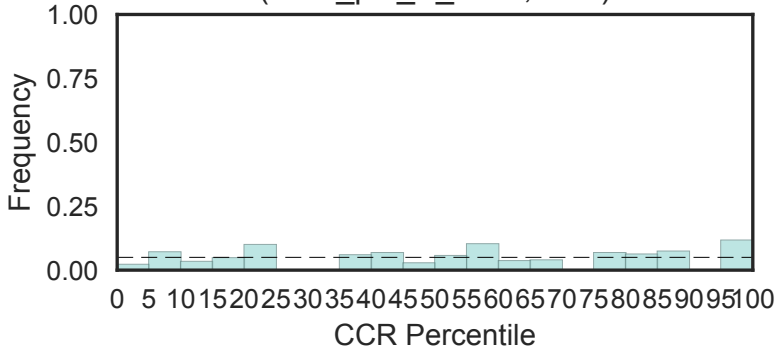

DNA polymerase beta palm  
(DNA\_pol\_B\_palm, N=4)  
Fisher's OR: 0; Bonferroni p-val: 1

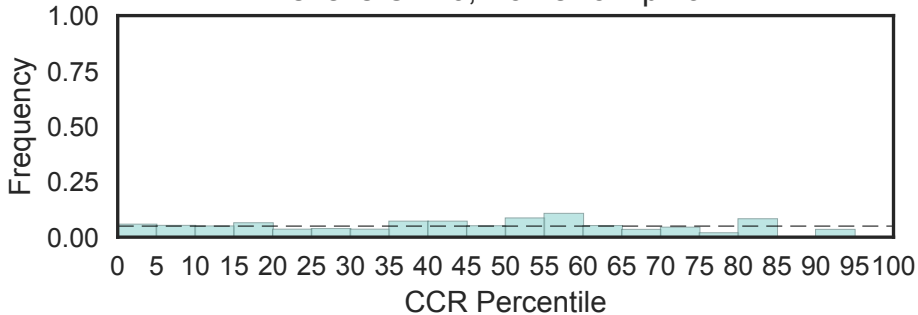

DNA polymerase beta thumb  
(DNA\_pol\_B\_thumb, N=4)  
Fisher's OR: 0; Bonferroni p-val: 1

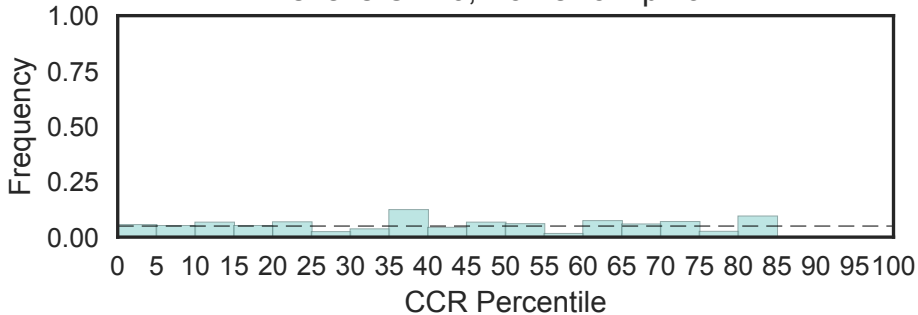



DNA polymerase alpha/epsilon subunit B  
(DNA\_pol\_E\_B, N=3)

Fisher's OR: 1.05; Bonferroni p-val: 1

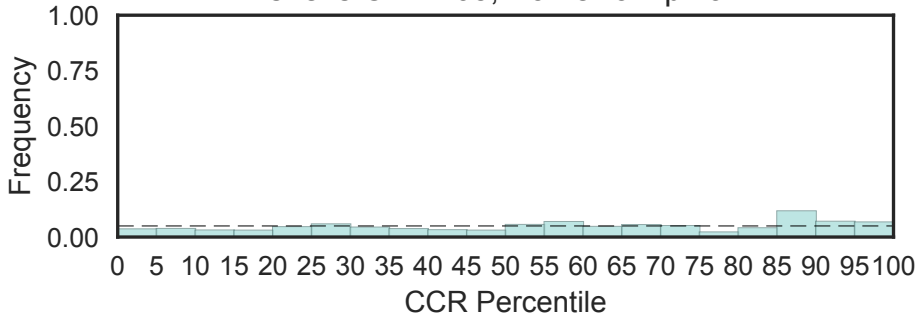

DNA polymerase delta, subunit 4  
(DNA\_pol\_delta\_4, N=1)

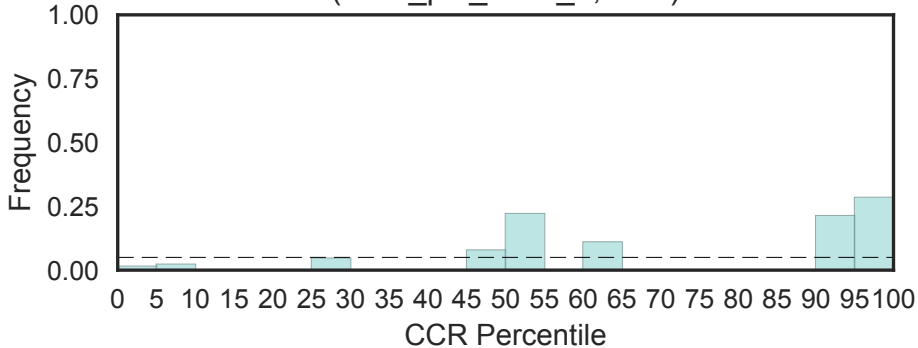

Fingers domain of DNA polymerase lambda  
(DNA\_pol\_lambd\_f, N=4)

Fisher's OR: 0; Bonferroni p-val: 1

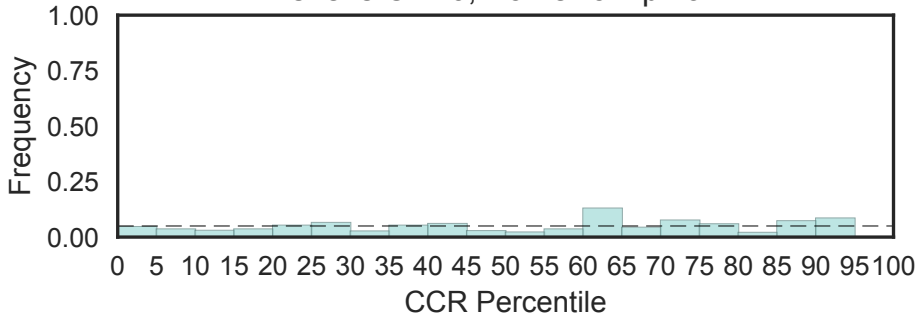

DNA polymerase phi  
(DNA\_pol\_phi, N=1)

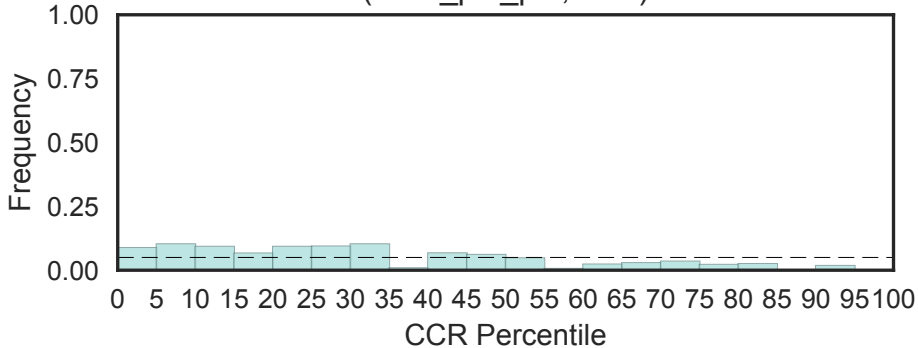

DNA primase small subunit  
(DNA\_primase\_S, N=1)

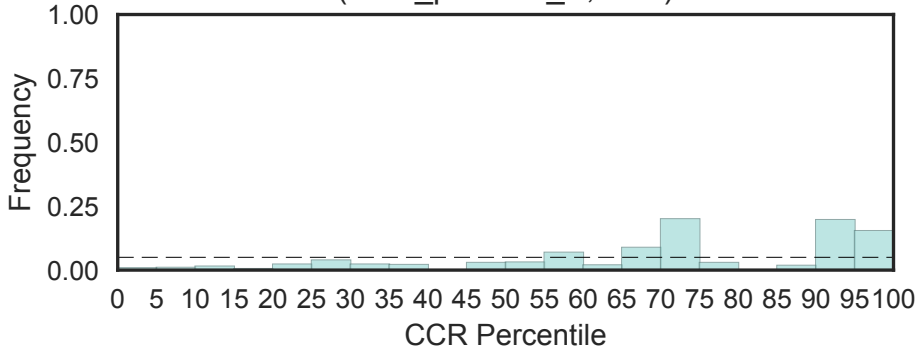

Eukaryotic and archaeal DNA primase, large subunit  
(DNA\_primase\_lrg, N=1)

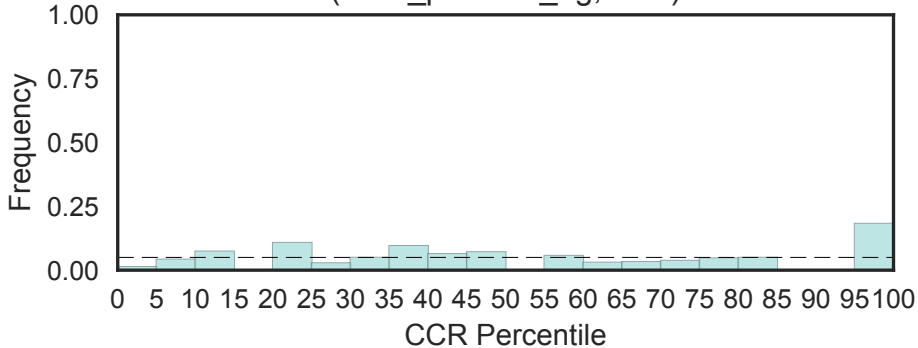

DNA repair REX1-B  
(DNA\_repr\_REX1B, N=1)

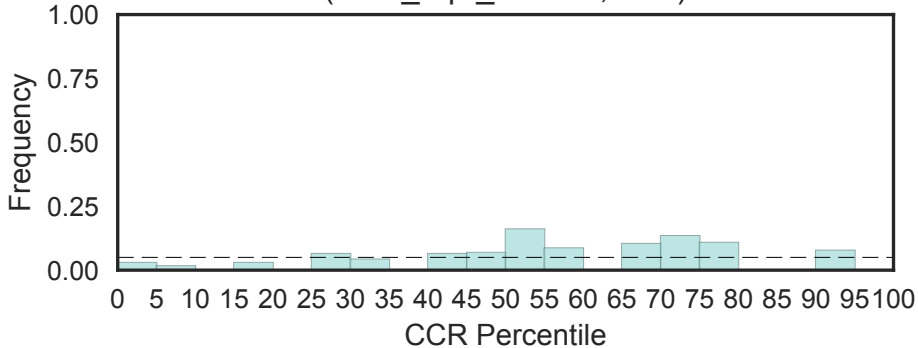

DNA gyrase/topoisomerase IV, subunit A  
(DNA\_topoisoIV, N=2)

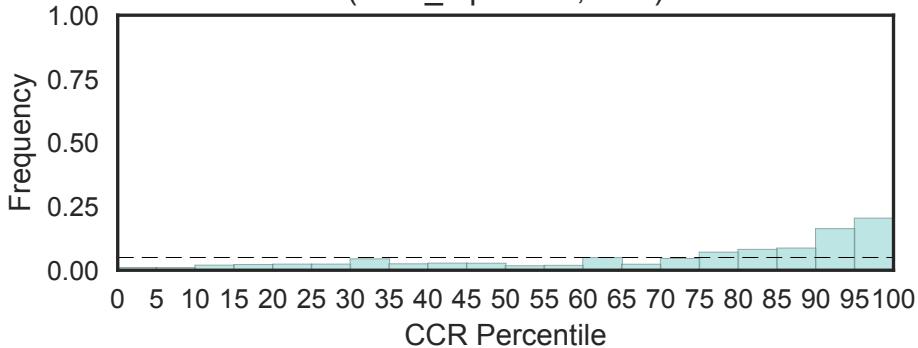



double strand RNA binding domain from DEAD END PROTEIN 1  
(DND1\_DSRM, N=5)

Fisher's OR: 1.59; Bonferroni p-val: 1

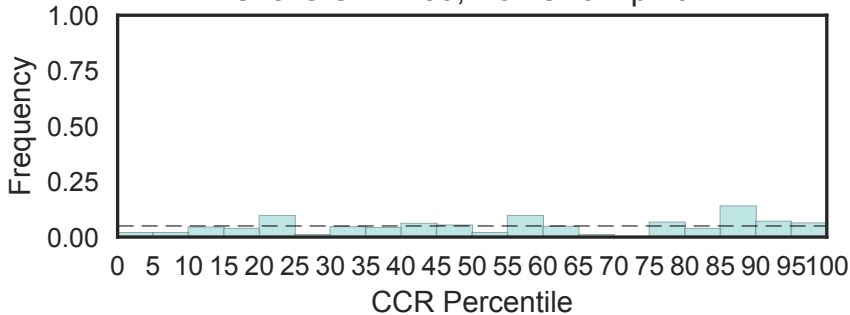

# Cytosine specific DNA methyltransferase replication foci domain (DNMT1-RFD, N=1)

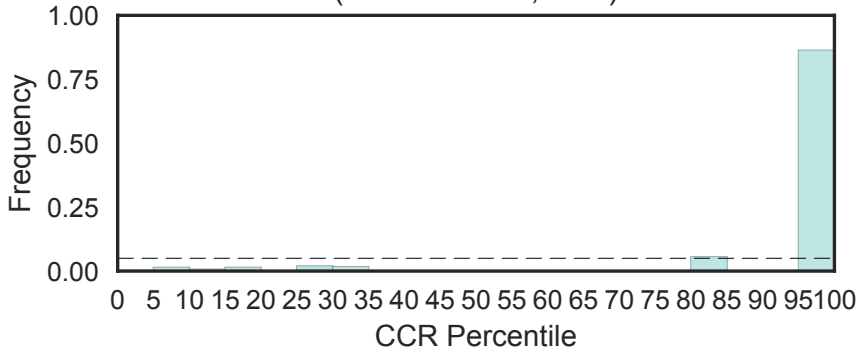

# Deoxyribonuclease II (DNase\_II, N=2)

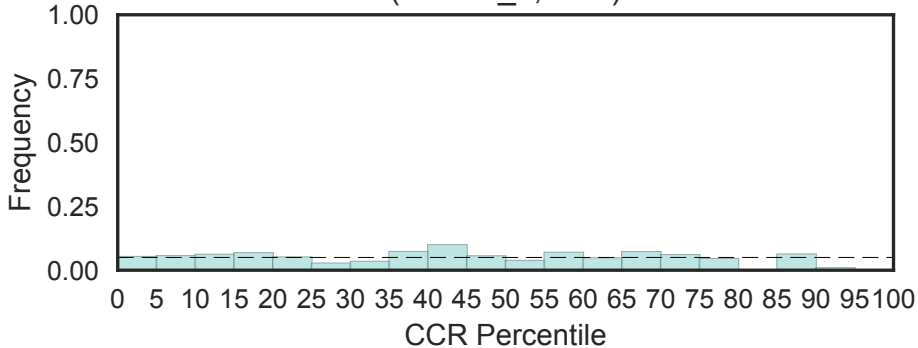

C2 domain in Dock180 and Zizimin proteins  
(DOCK-C2, N=13)

Fisher's OR: 1.71; Bonferroni p-val: 1

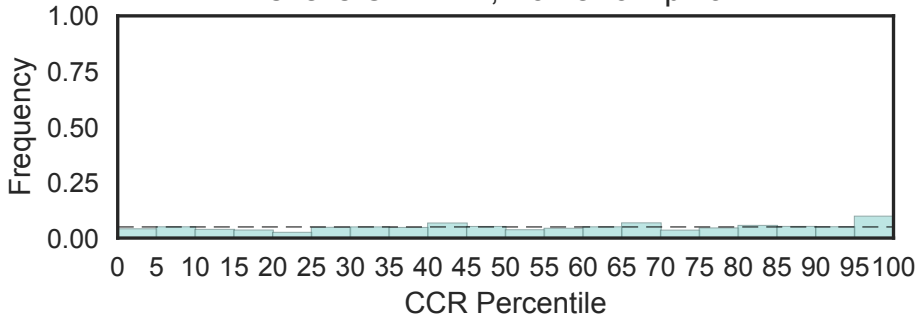

DOCK N-terminus  
(DOCK\_N, N=5)

Fisher's OR: 3.09; Bonferroni p-val: 1

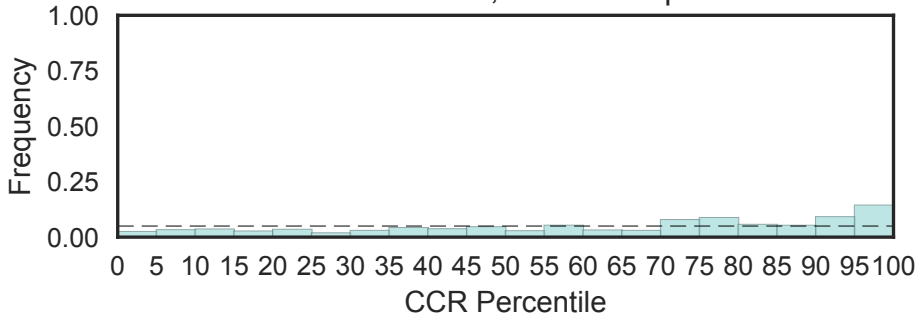

DOMON domain  
(DOMON, N=4)

Fisher's OR: 1.14; Bonferroni p-val: 1

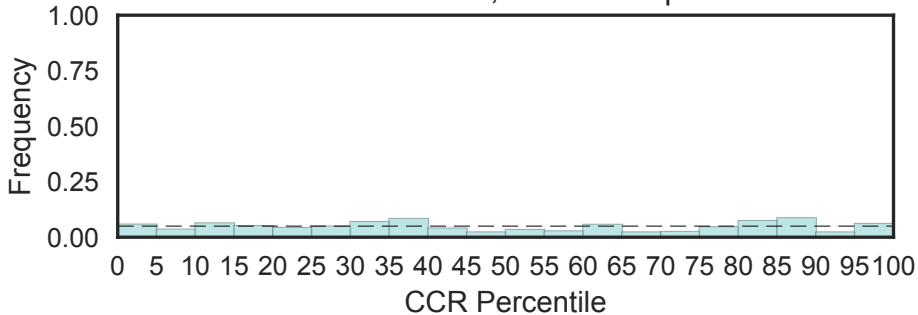

DOR family  
(DOR, N=2)

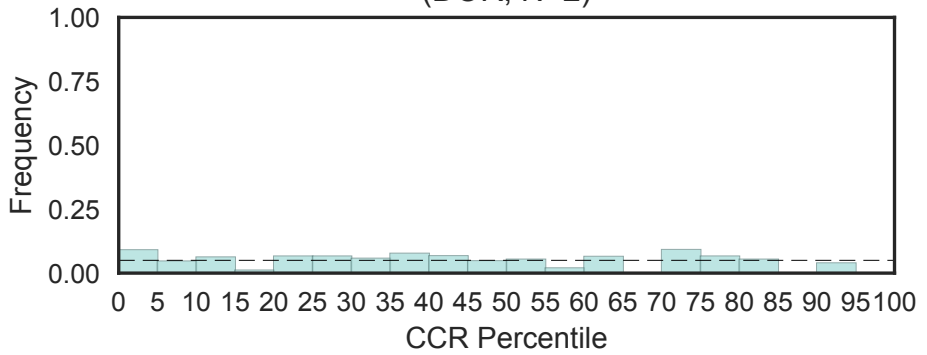

# Histone methylation protein DOT1 (DOT1, N=1)

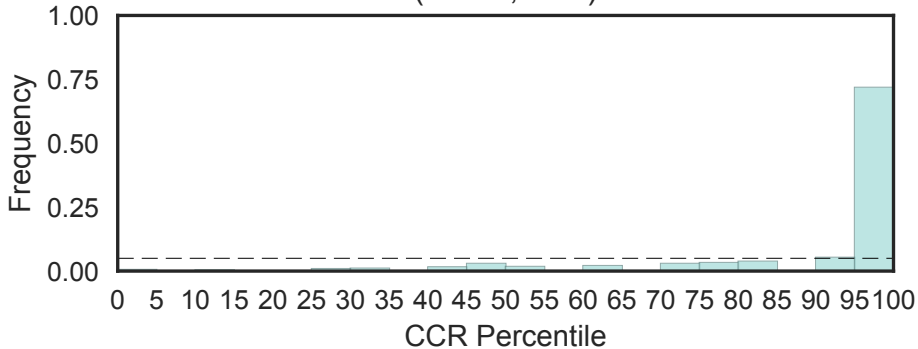



Transcription factor DP  
(DP, N=2)

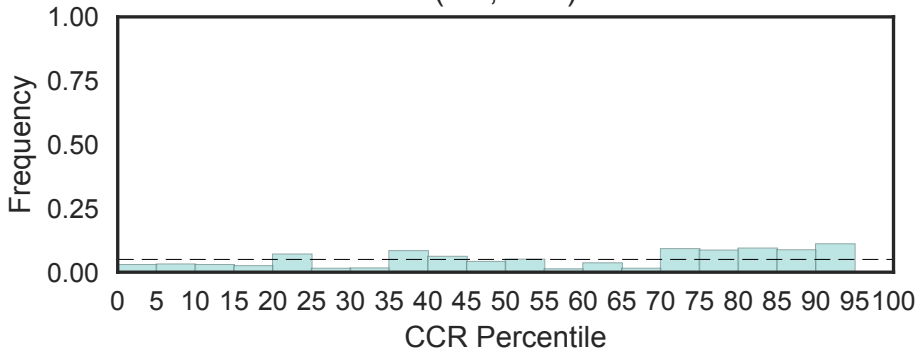

DPCD protein family  
(DPCD, N=1)

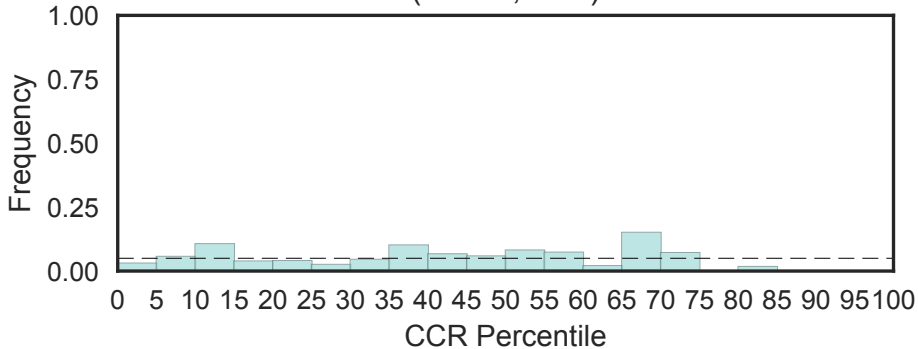

# Dolichol phosphate-mannose biosynthesis regulatory protein (DPM2) (DPM2, N=1)

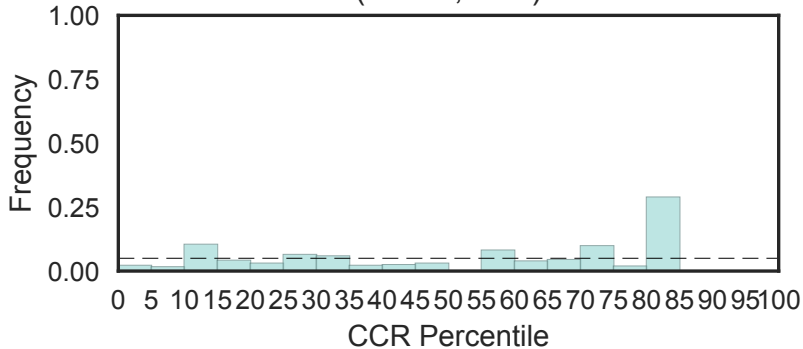

# Dolichol-phosphate mannosyltransferase subunit 3 (DPM3) (DPM3, N=1)

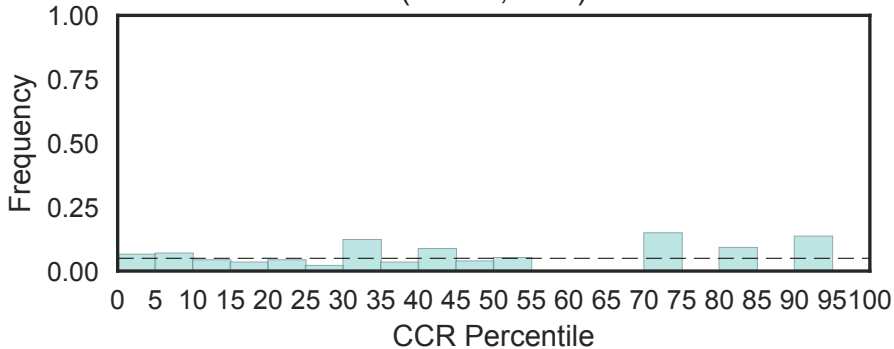

Dipeptidyl peptidase IV (DPP IV) N-terminal region  
(DPPIV\_N, N=6)

Fisher's OR: 1.05; Bonferroni p-val: 1

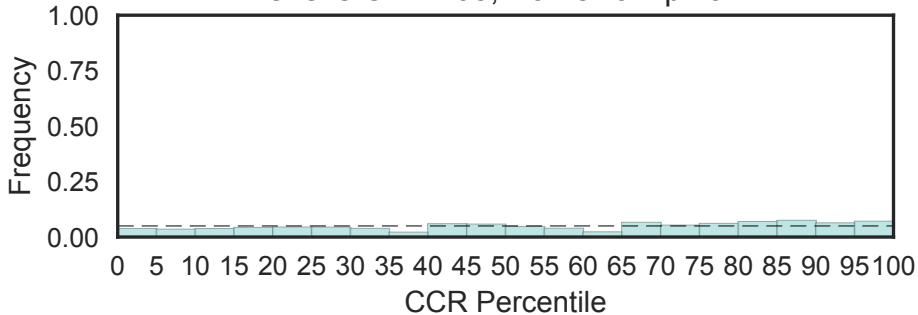

# DREV methyltransferase (DREV, N=2)

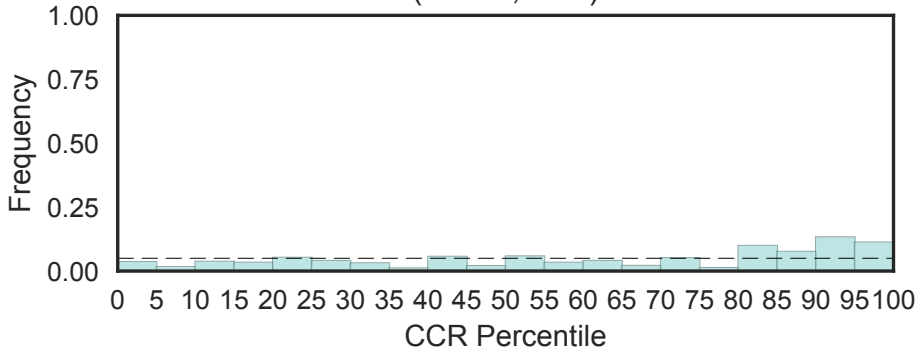

Down-regulated in metastasis  
(DRIM, N=1)

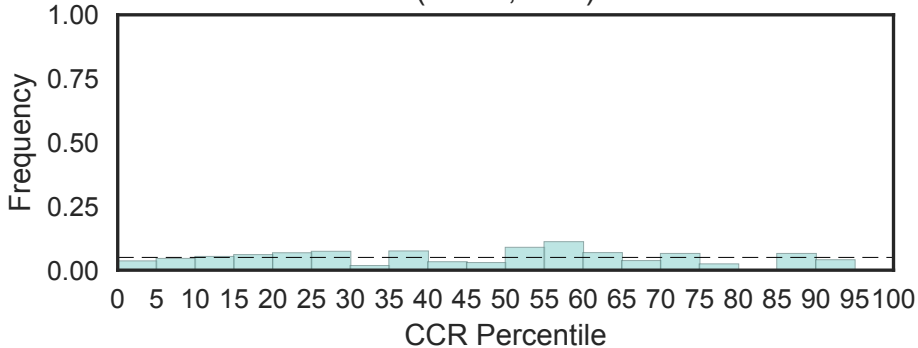

DNA repair metallo-beta-lactamase  
(DRMBL, N=3)

Fisher's OR: 0; Bonferroni p-val: 1

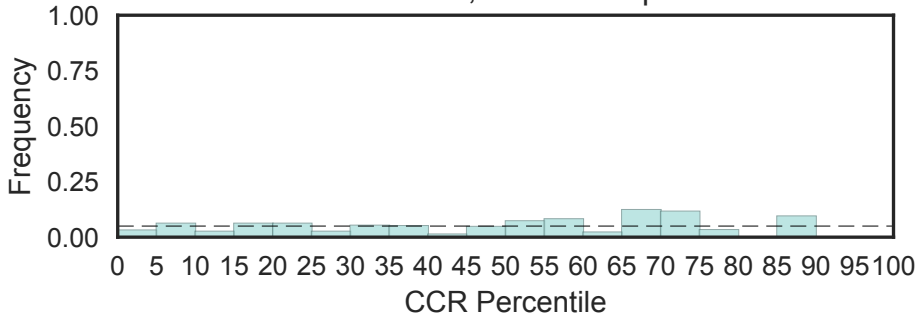



Alternative splicing regulator  
(DRY\_EERY, N=2)

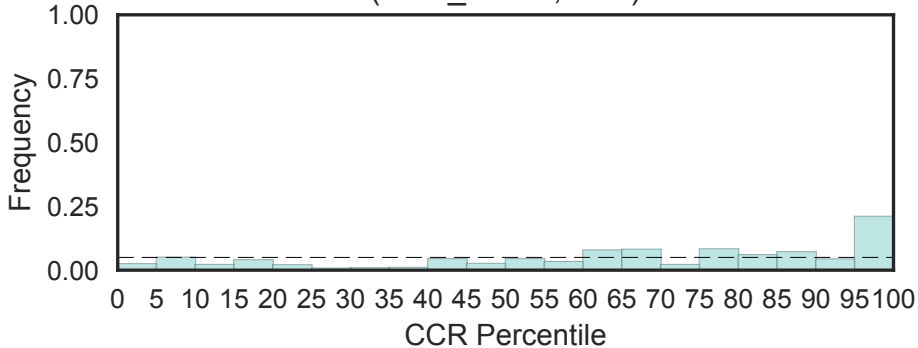

# Deoxyhypusine synthase (DS, N=1)

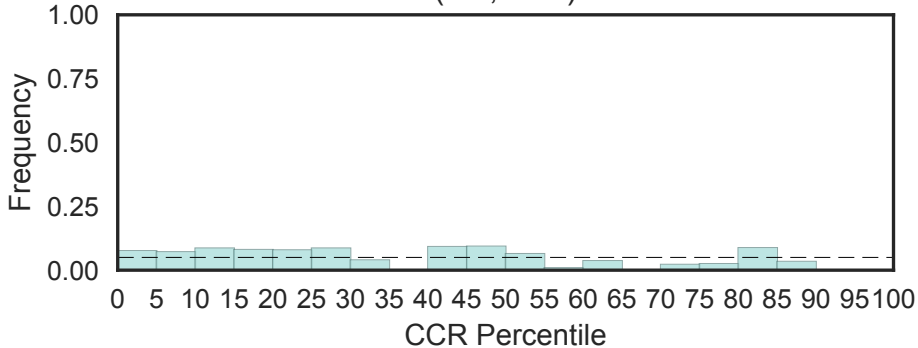

DSBA-like thioredoxin domain  
(DSBA, N=1)

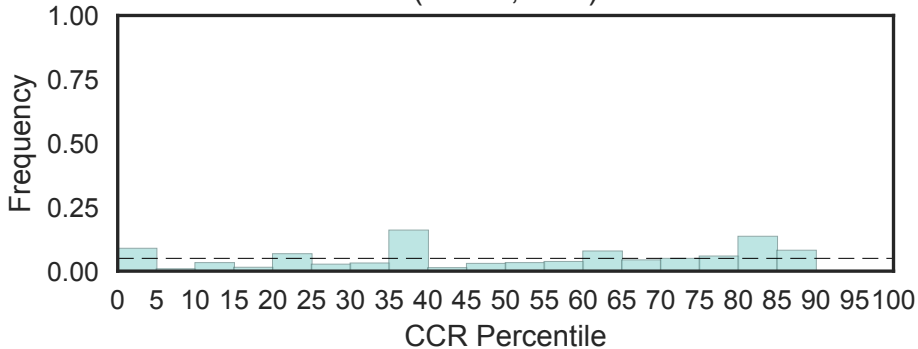

DSHCT (NUC185) domain  
(DSHCT, N=2)

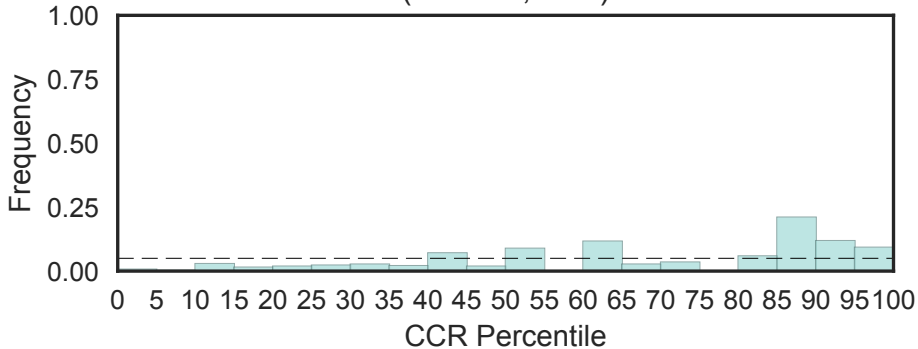

Delta serrate ligand  
(DSL, N=4)

Fisher's OR: 1.77; Bonferroni p-val: 1

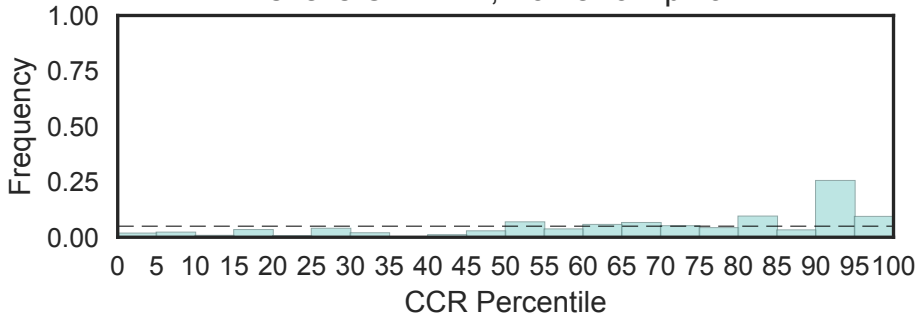

Dual specificity phosphatase, catalytic domain  
(DSPc, N=47)

Fisher's OR: 0.882; Bonferroni p-val: 1

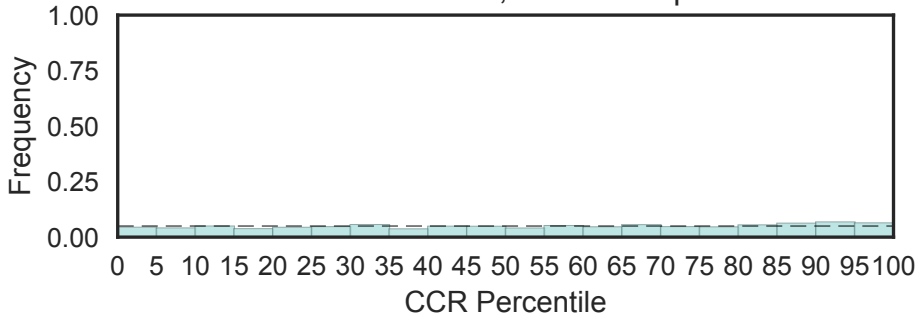

Dual specificity protein phosphatase, N-terminal half  
(DSPn, N=2)

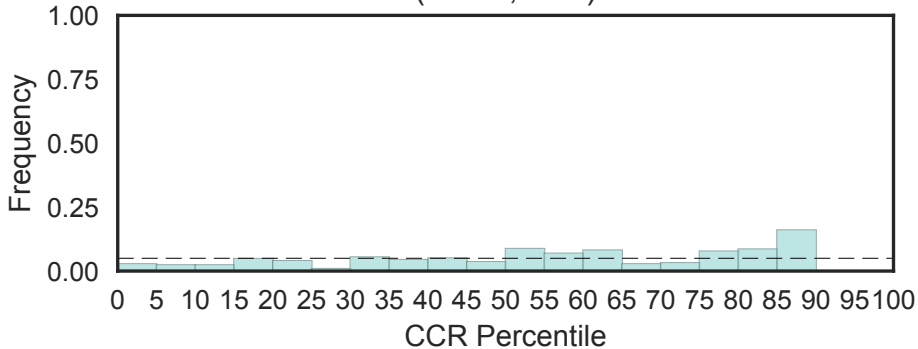

DSS1/SEM1 family  
(DSS1\_SEM1, N=1)

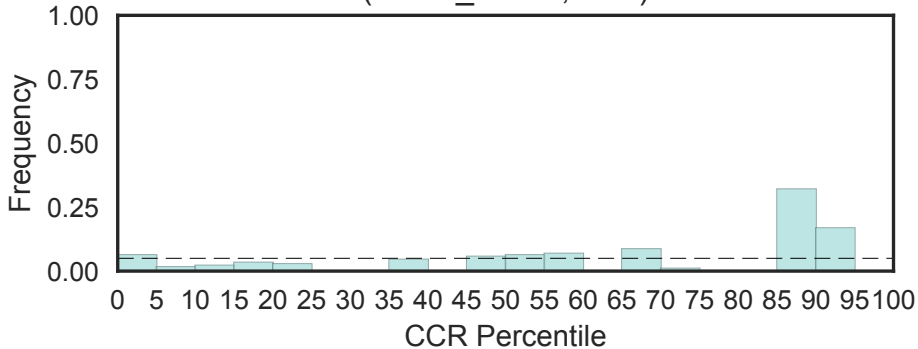



DTHCT (NUC029) region  
(DTHCT, N=2)

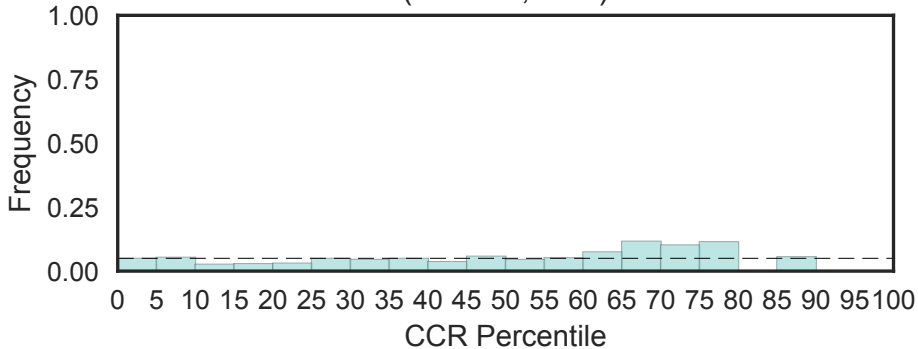

DTW domain  
(DTW, N=2)

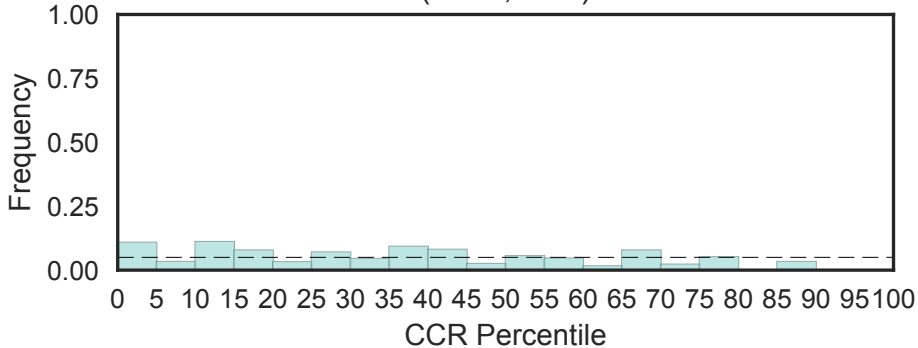

Protein of unknown function (DUF1011)  
(DUF1011, N=3)

Fisher's OR: 0; Bonferroni p-val: 1

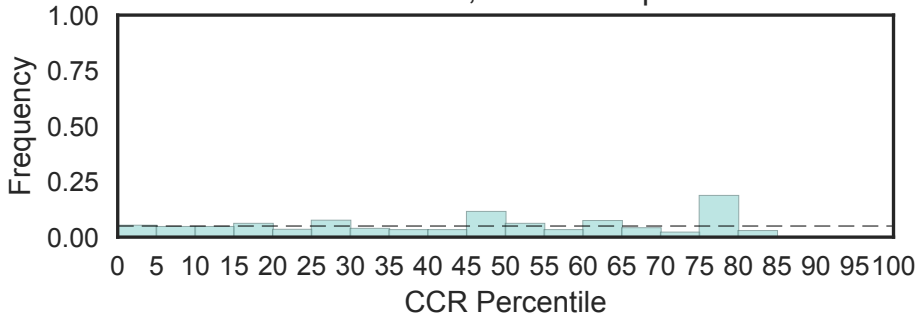

Domain of Unknown Function (DUF1041)  
(DUF1041, N=5)

Fisher's OR: 1.29; Bonferroni p-val: 1

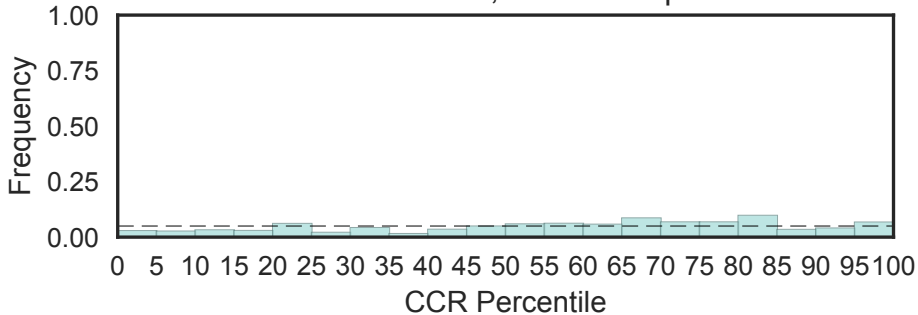

Domain of Unknown Function (DUF1053)  
(DUF1053, N=6)

Fisher's OR: 1.32; Bonferroni p-val: 1

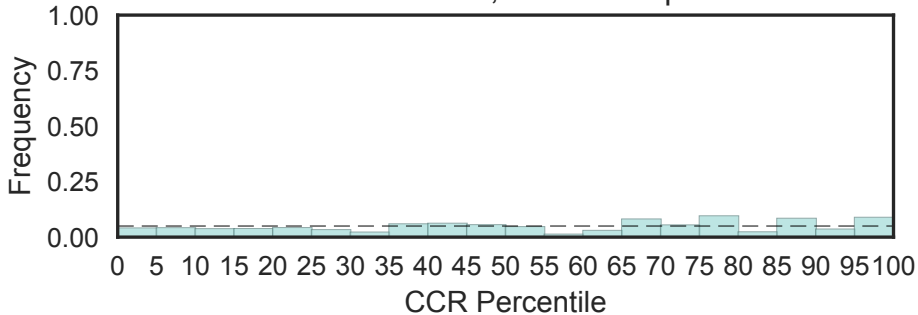

Alpha/beta hydrolase of unknown function (DUF1057)  
(DUF1057, N=1)

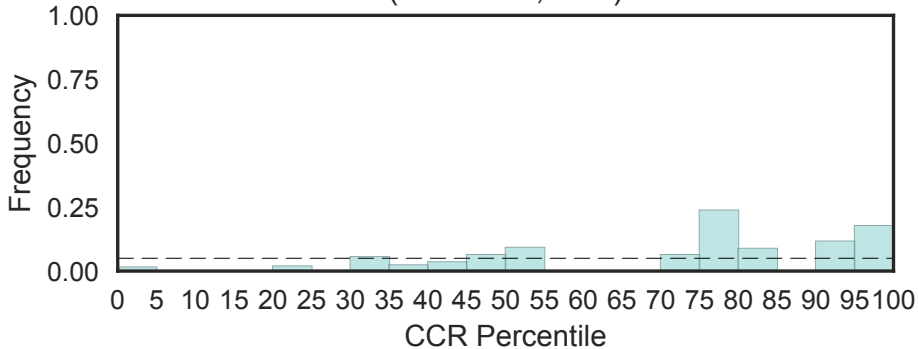

Integral membrane protein DUF106  
(DUF106, N=2)

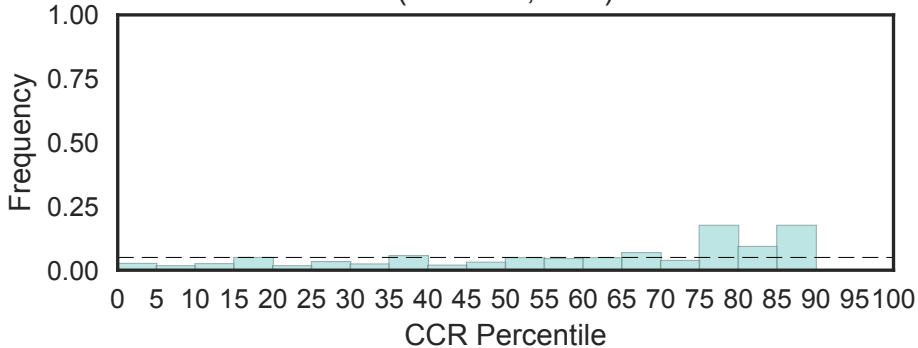

Protein of unknown function (DUF1075)  
(DUF1075, N=2)

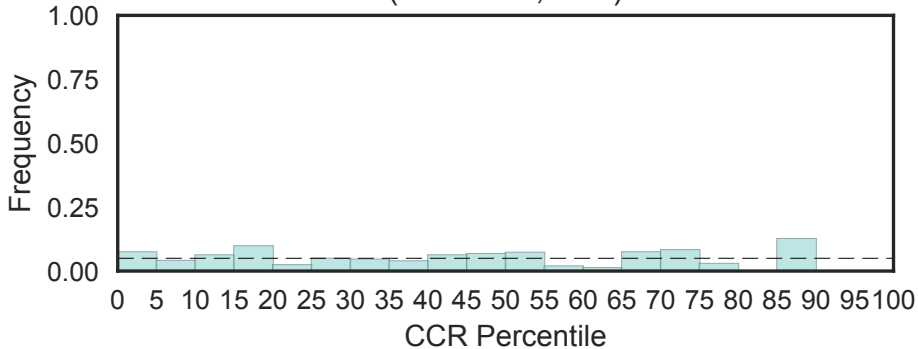



Protein of unknown function (DUF1077)  
(DUF1077, N=1)

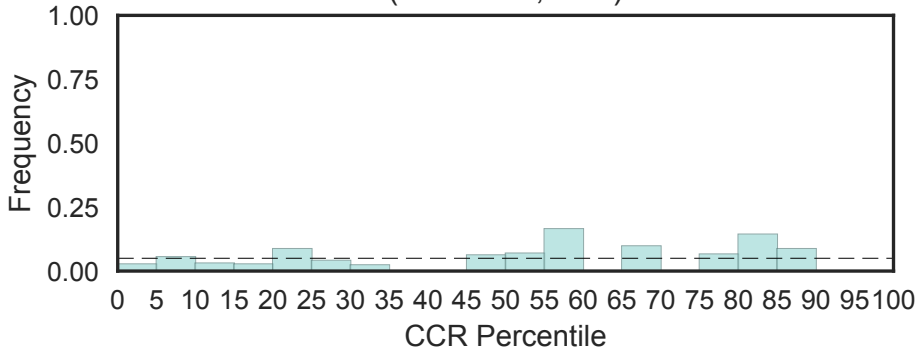

Domain of unknown function DUF108  
(DUF108, N=1)

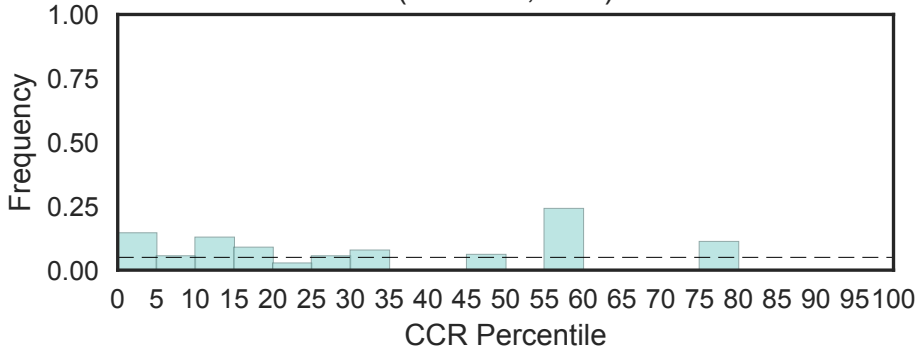

Domain of Unknown Function (DUF1081)  
(DUF1081, N=1)

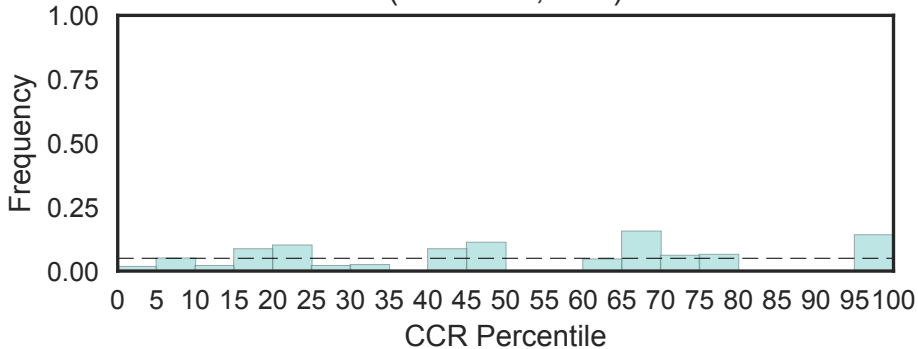

Domain of Unknown Function (DUF1086)  
(DUF1086, N=3)

Fisher's OR: 20.7; Bonferroni p-val: 1.42e-05

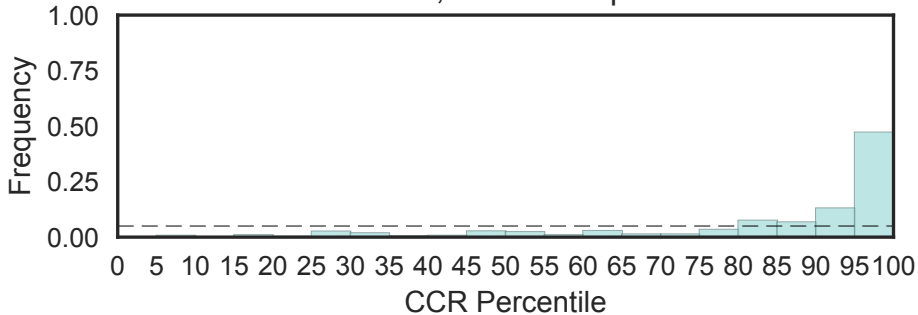

Domain of Unknown Function (DUF1087)  
(DUF1087, N=3)

Fisher's OR: 27; Bonferroni p-val: 0.00176

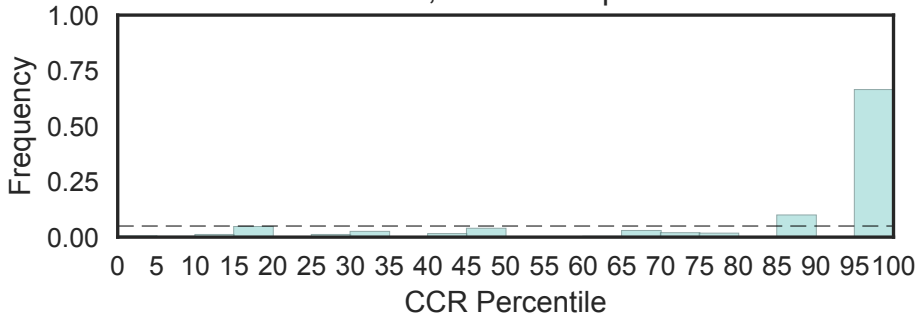

Domain of Unknown Function (DUF1088)  
(DUF1088, N=2)

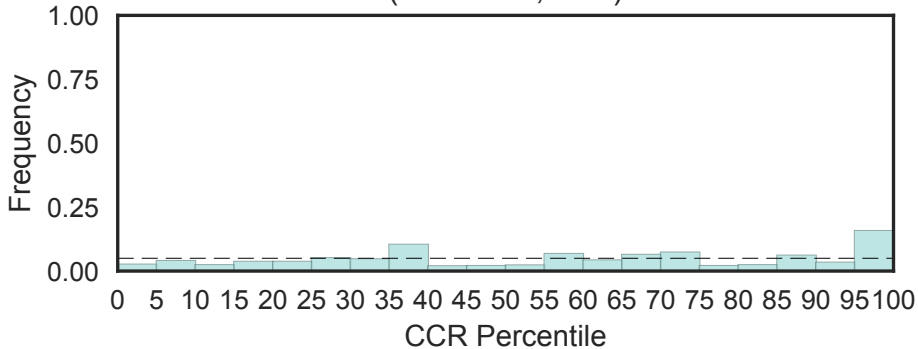

Protein of unknown function (DUF1115)  
(DUF1115, N=3)

Fisher's OR: 0; Bonferroni p-val: 1

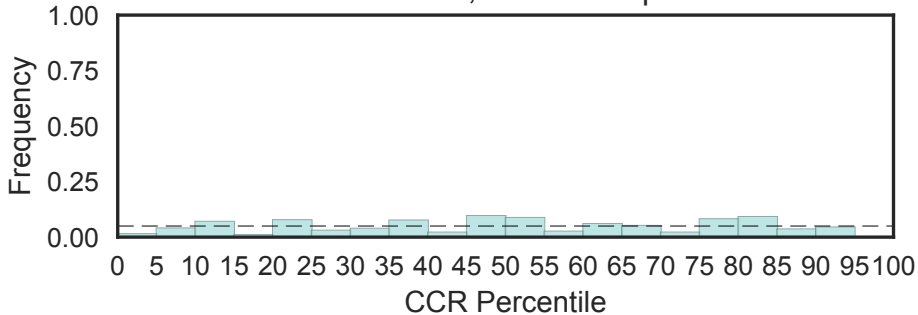

DUF1126 PH-like domain  
(DUF1126, N=4)

Fisher's OR: 0; Bonferroni p-val: 1

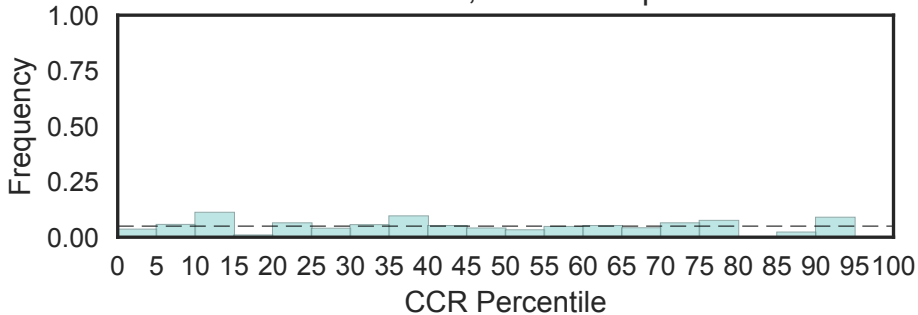



Protein of unknown function (DUF1143)  
(DUF1143, N=2)

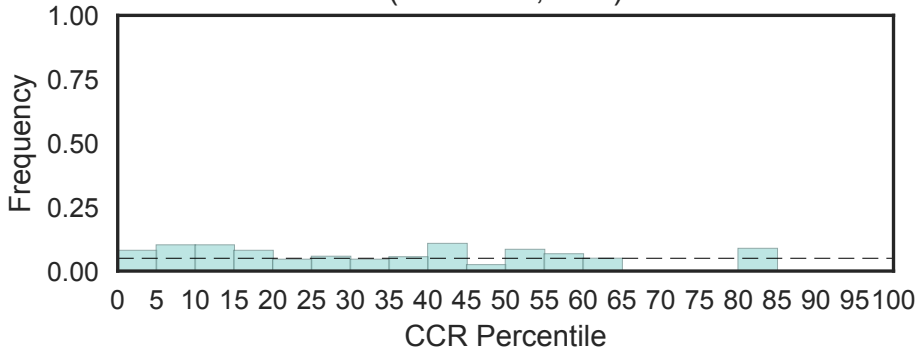

Protein of unknown function (DUF1151)  
(DUF1151, N=2)

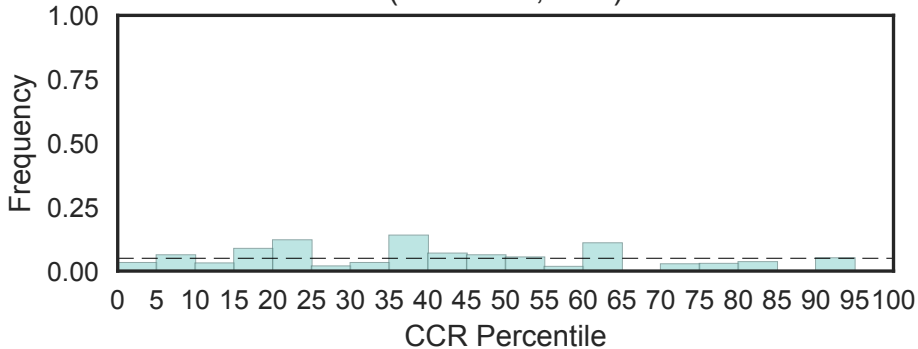

Protein of unknown function (DUF1154)  
(DUF1154, N=2)

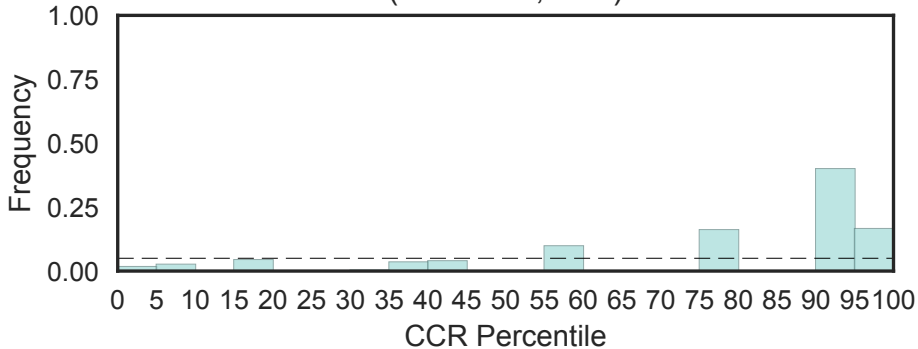

Protein of unknown function (DUF1168)  
(DUF1168, N=1)

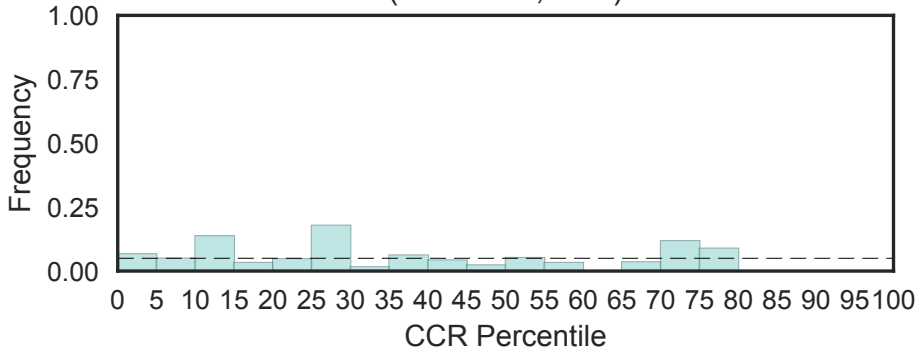

Protein of unknown function (DUF1170)  
(DUF1170, N=1)

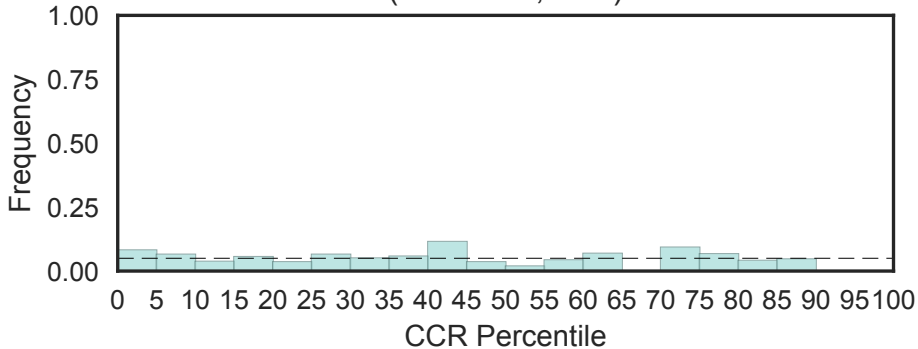

Protein of unknown function (DUF1180)  
(DUF1180, N=3)

Fisher's OR: 0; Bonferroni p-val: 1

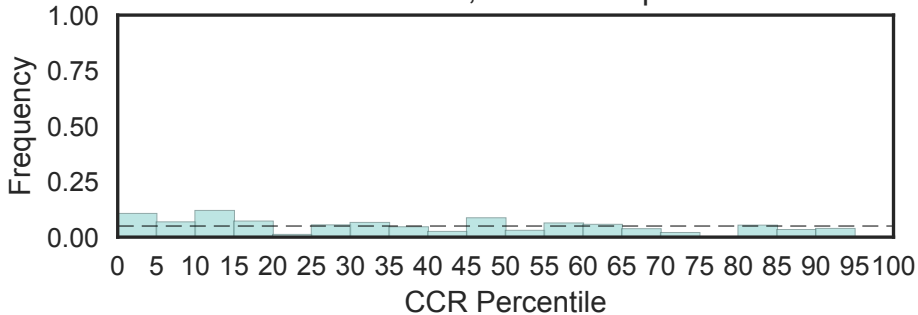

Protein of unknown function (DUF1211)  
(DUF1211, N=2)

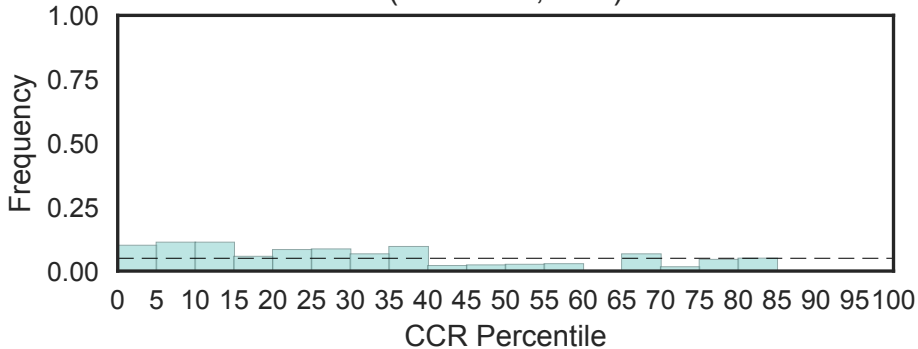

Repeat of unknown function (DUF1220)  
(DUF1220, N=126)

Fisher's OR: 0.256; Bonferroni p-val: 0.0639

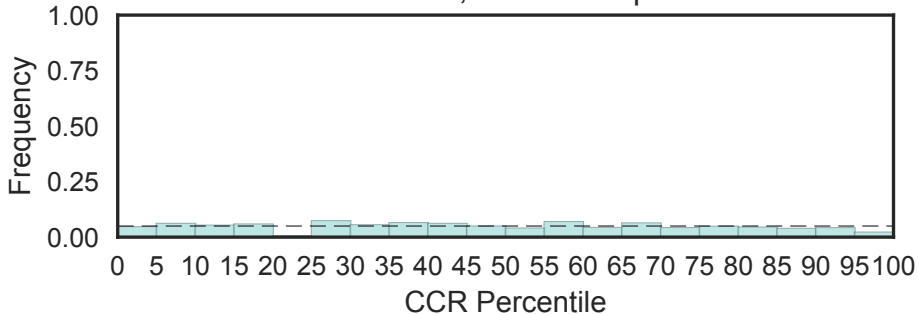



Protein of unknown function (DUF1232)  
(DUF1232, N=1)

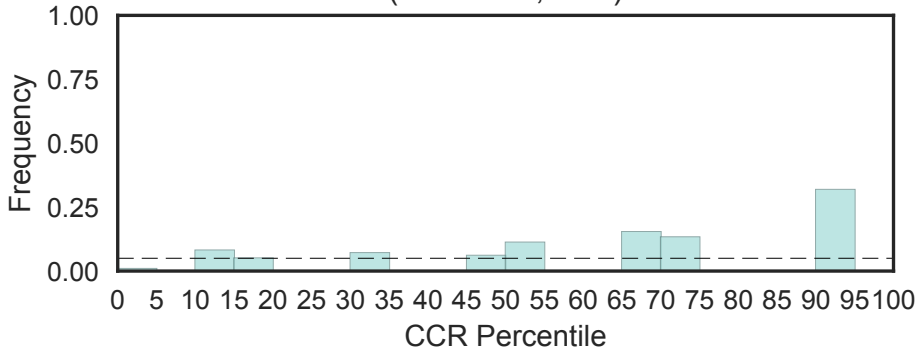

Protein of unknown function (DUF1241)  
(DUF1241, N=1)

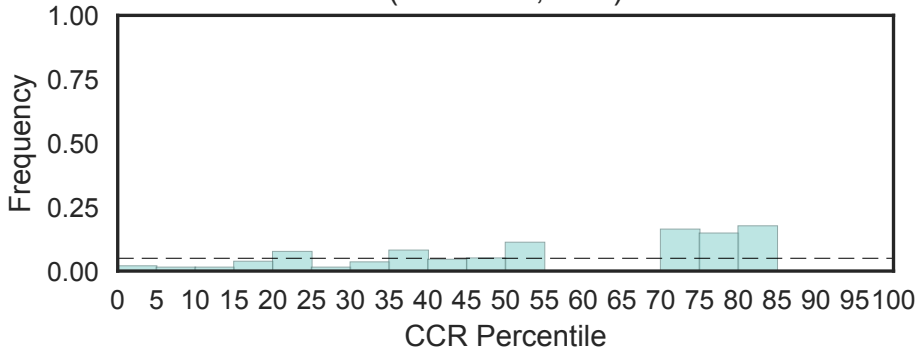

Protein of unknown function (DUF1242)  
(DUF1242, N=2)

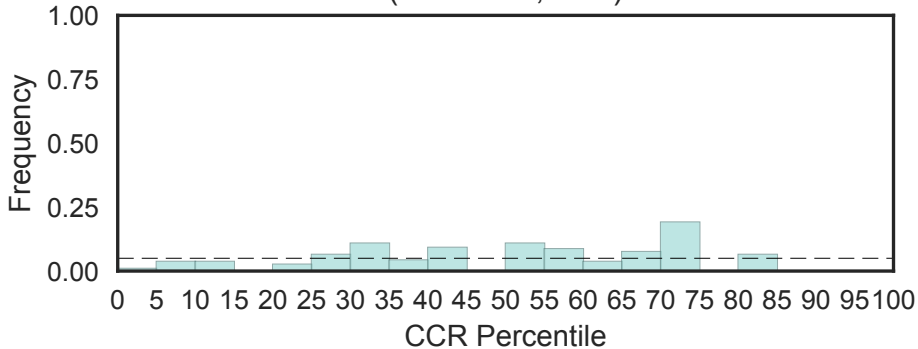

Protein of unknown function (DUF1279)  
(DUF1279, N=2)

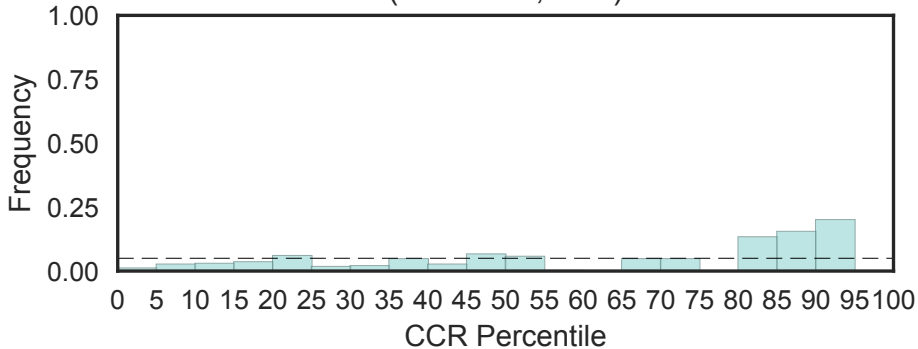

Protein of unknown function (DUF1295)  
(DUF1295, N=3)

Fisher's OR: 0; Bonferroni p-val: 1

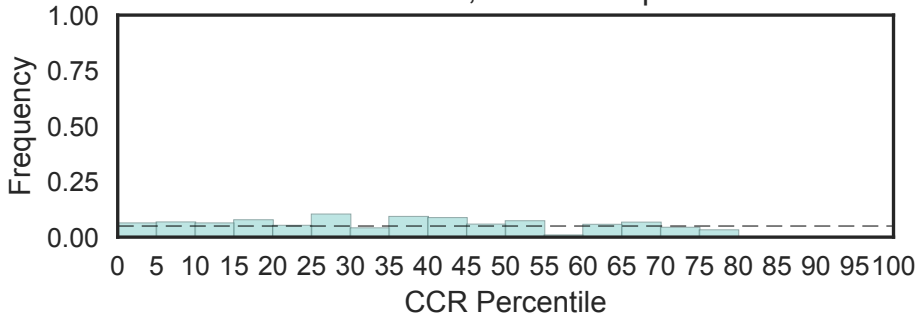

Protein of unknown function (DUF1308)  
(DUF1308, N=1)

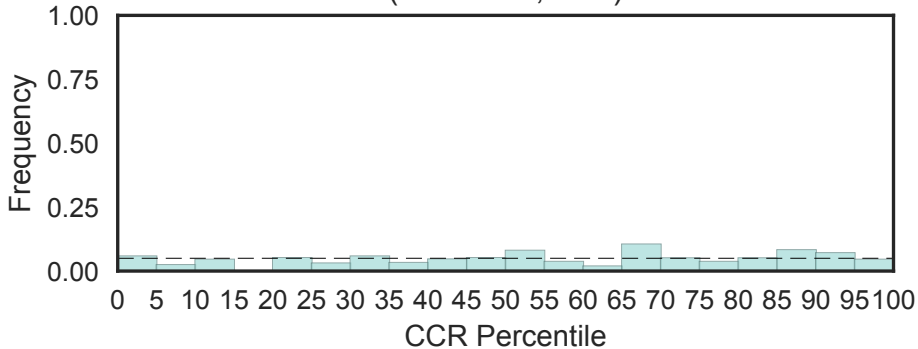

SGF29 tudor-like domain  
(DUF1325, N=1)

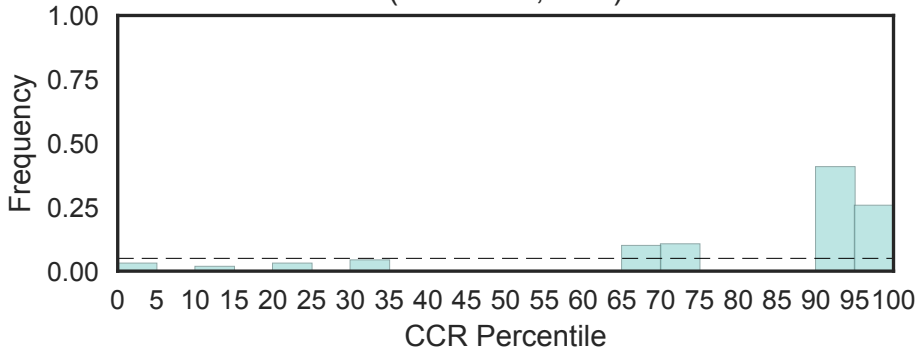

Protein of unknown function (DUF1356)  
(DUF1356, N=3)

Fisher's OR: 0; Bonferroni p-val: 1

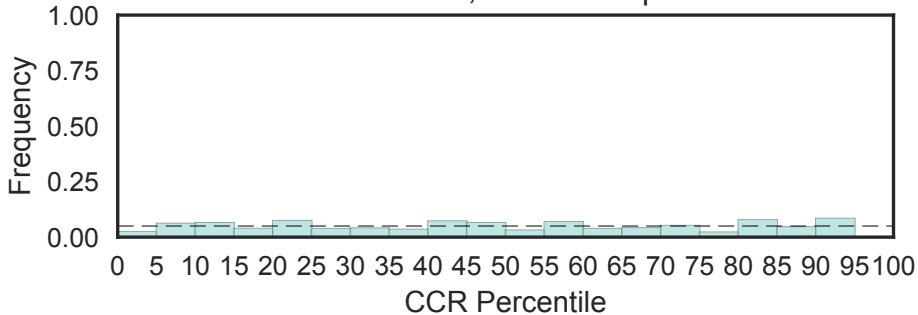



Protein of unknown function (DUF1358)  
(DUF1358, N=1)

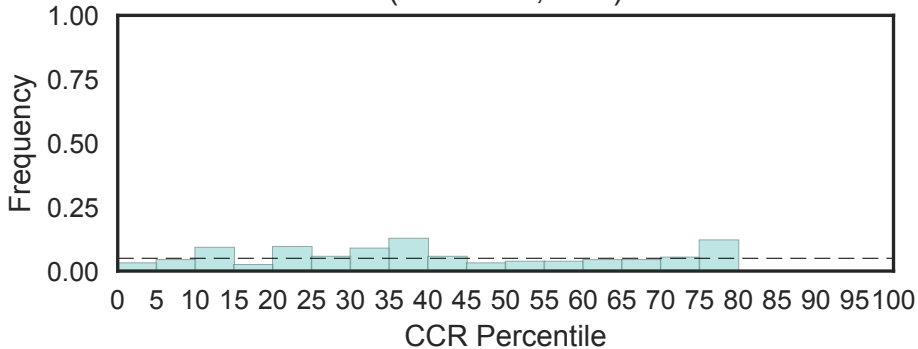

Protein of unknown function (DUF1387)  
(DUF1387, N=2)

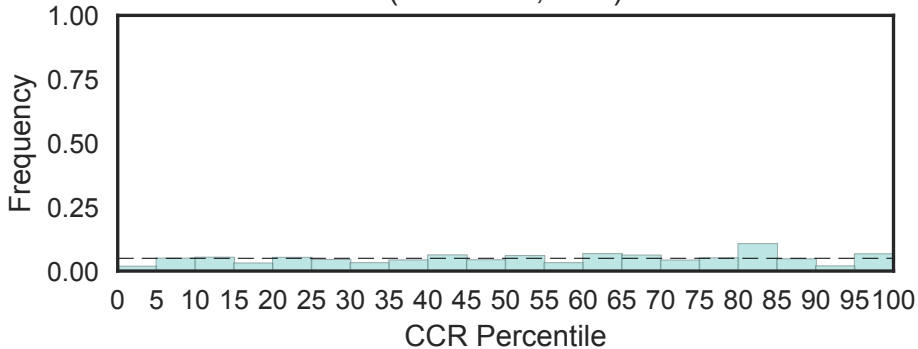

Protein of unknown function (DUF1394)  
(DUF1394, N=4)

Fisher's OR: 12.2; Bonferroni p-val: 2.62e-11

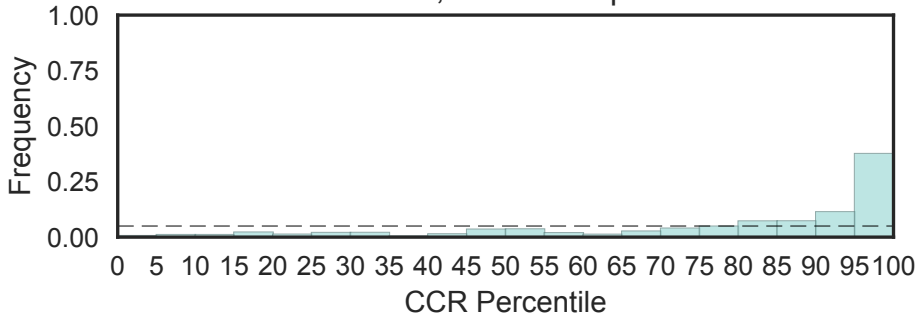

Protein of unknown function (DUF1445)  
(DUF1445, N=1)

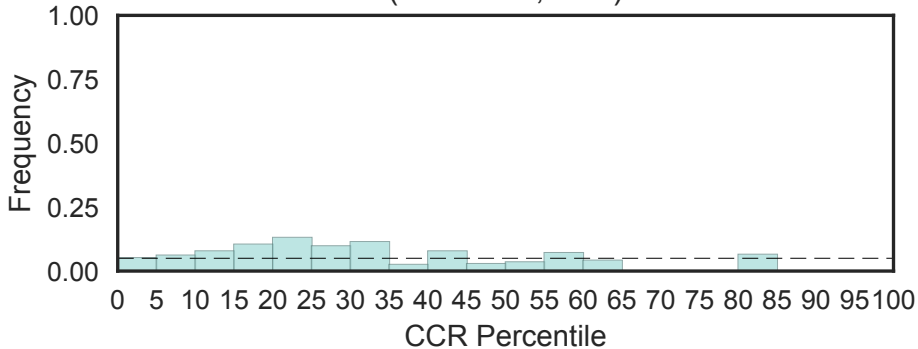

Protein of unknown function (DUF1466)  
(DUF1466, N=1)

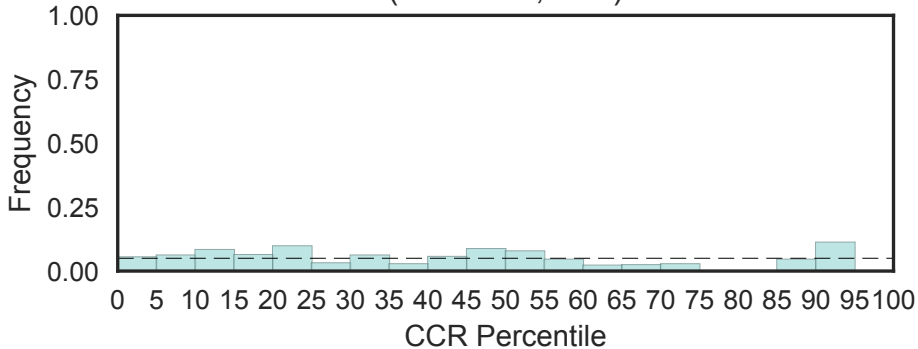

Protein of unknown function (DUF1487)  
(DUF1487, N=1)

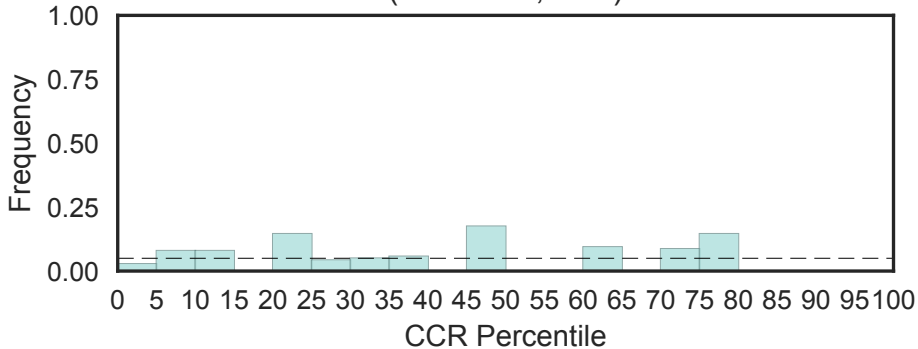

Domain of unknown function (DUF1518)  
(DUF1518, N=4)

Fisher's OR: 0; Bonferroni p-val: 1

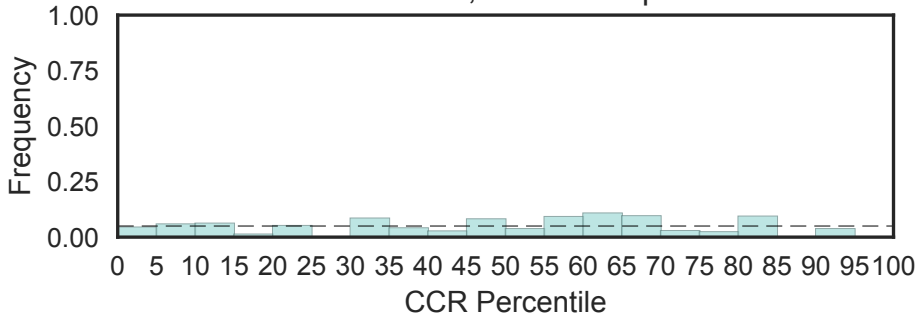

Uncharacterised ACR, YagE family COG1723  
(DUF155, N=1)

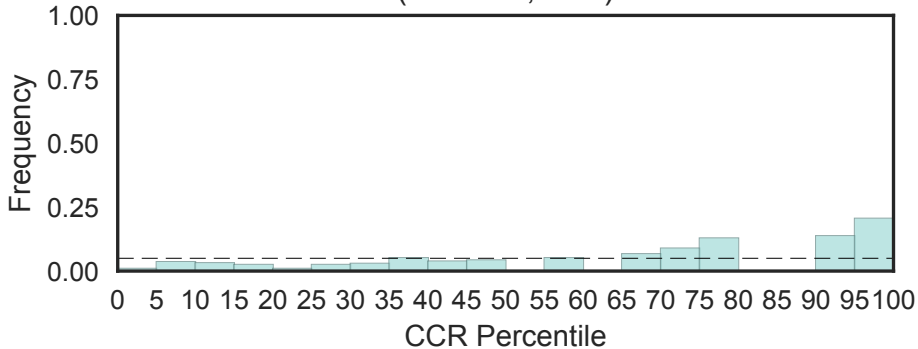



Protein of unknown function (DUF1601)  
(DUF1601, N=4)

Fisher's OR: 0; Bonferroni p-val: 1

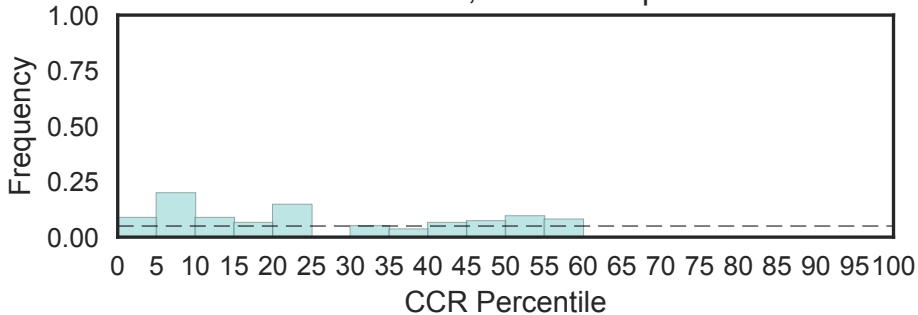

Protein of unknown function (DUF1604)  
(DUF1604, N=1)

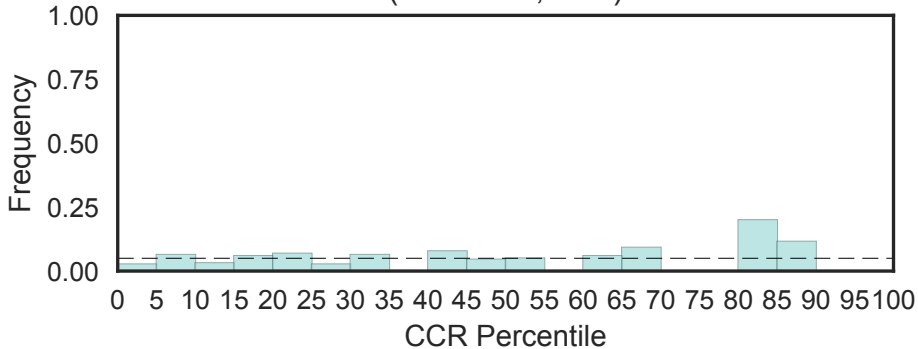

Protein of unknown function (DUF1619)  
(DUF1619, N=5)

Fisher's OR: 0.588; Bonferroni p-val: 1

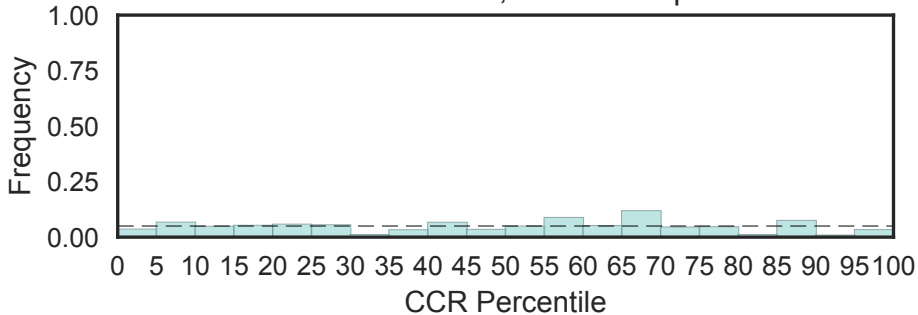

Protein of unknown function (DUF1620)  
(DUF1620, N=1)

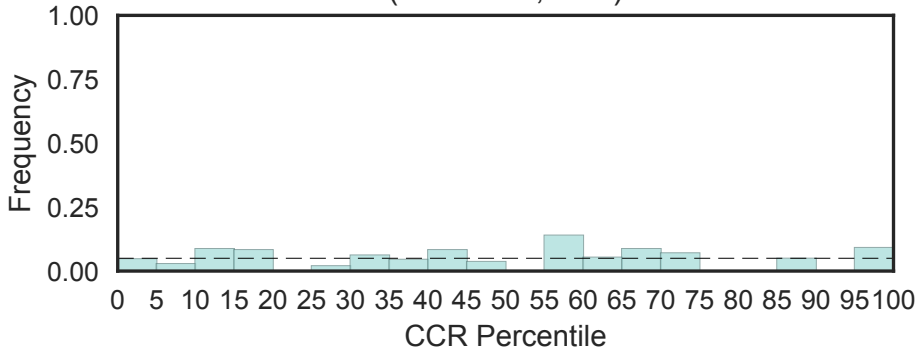

Protein of unknown function (DUF1624)  
(DUF1624, N=1)

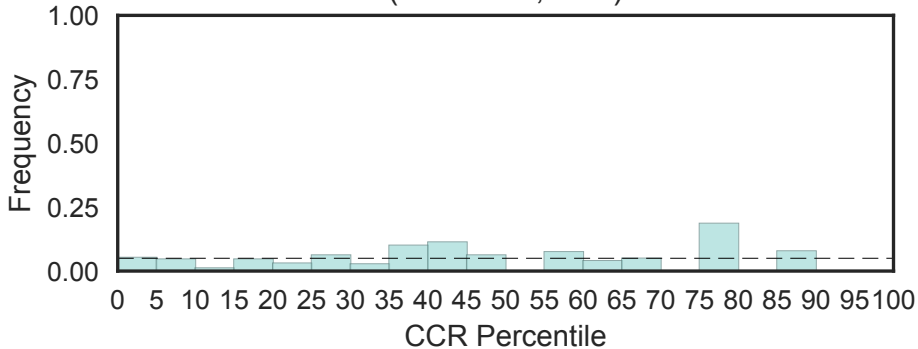

Protein of unknown function (DUF1640)  
(DUF1640, N=2)

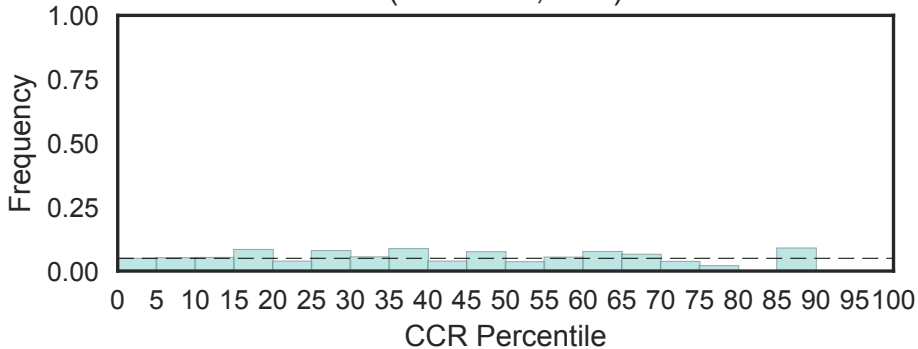

Protein of unknown function (DUF1668)  
(DUF1668, N=1)

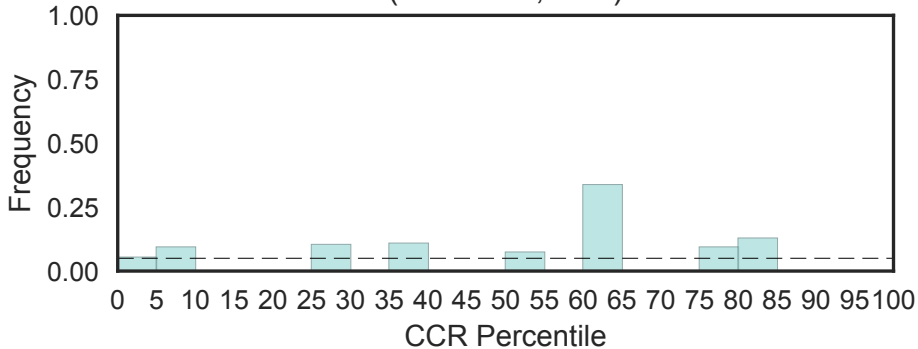

Protein of unknown function (DUF1669)  
(DUF1669, N=9)

Fisher's OR: 0.119; Bonferroni p-val: 1

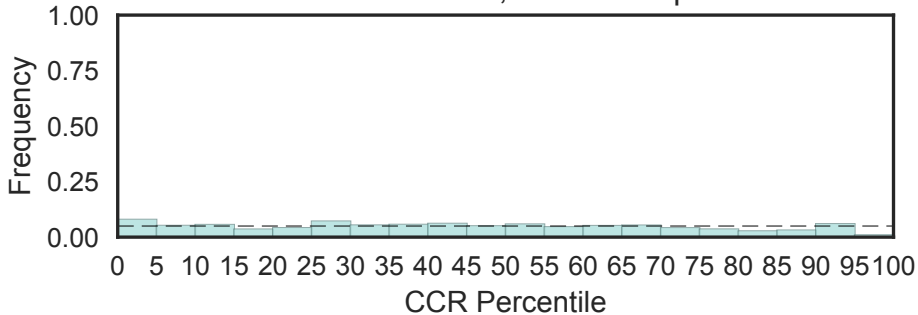



Uncharacterised ACR, YggU family COG1872  
(DUF167, N=1)

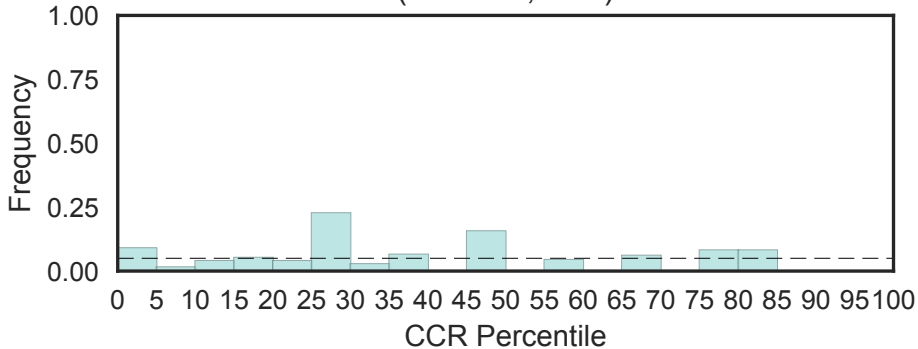

Protein of unknown function (DUF1674)  
(DUF1674, N=1)

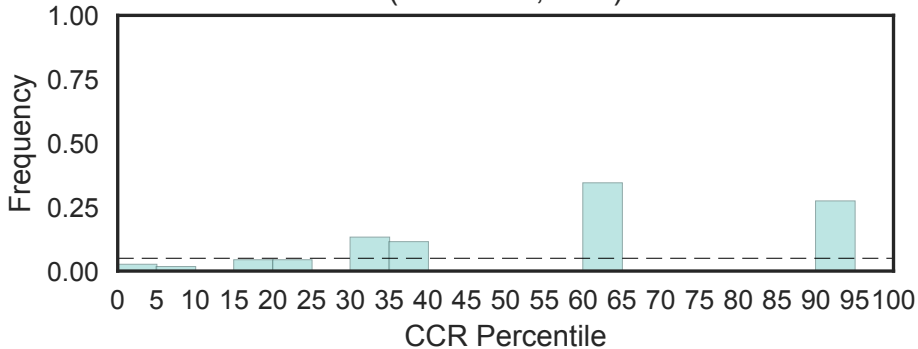

Protein of unknown function (DUF1681)  
(DUF1681, N=2)

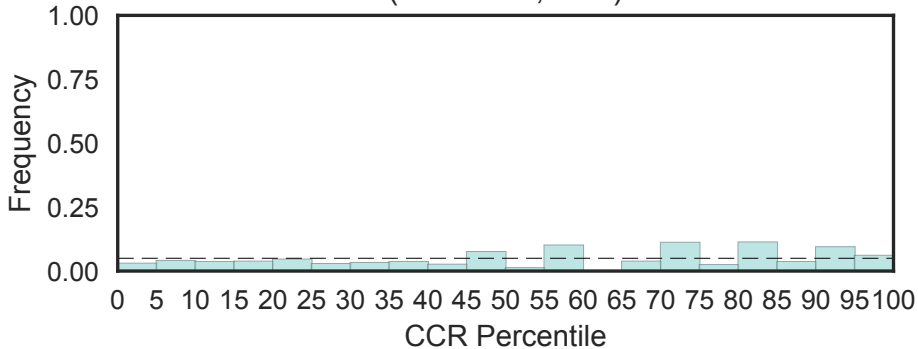

Protein of unknown function (DUF1682)  
(DUF1682, N=1)

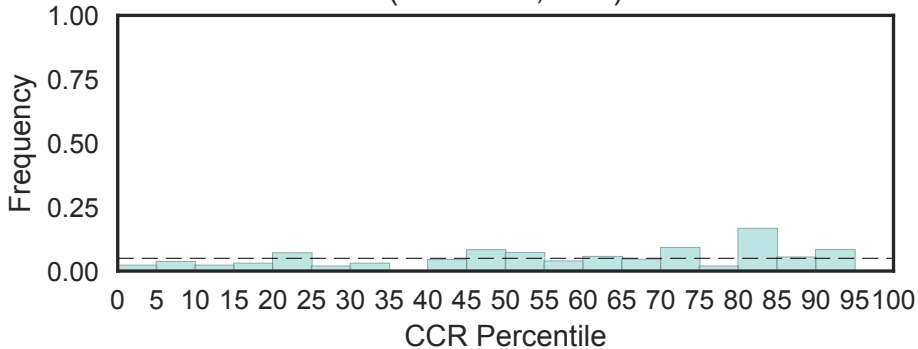

Domain of unknown function (DUF1704)  
(DUF1704, N=2)

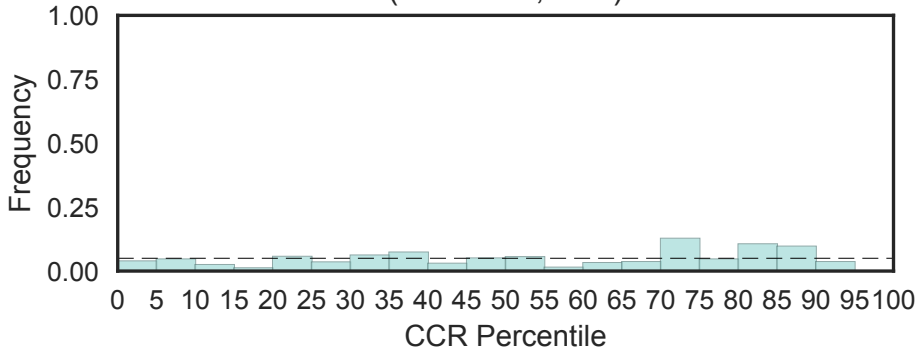

Mitochondrial domain of unknown function (DUF1713)  
(DUF1713, N=1)

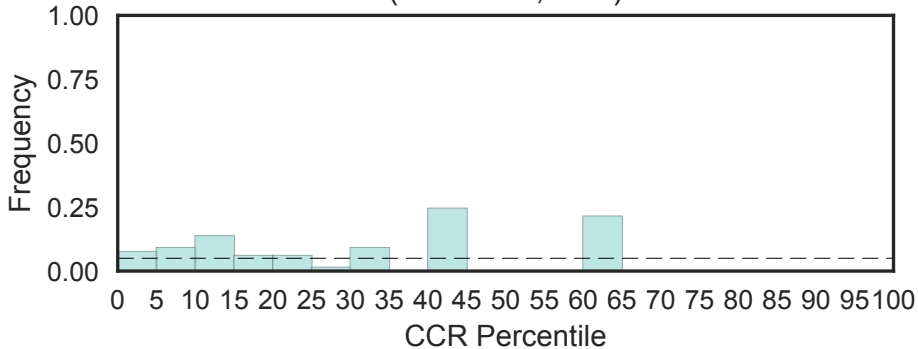

Domain of unknown function (DUF1726)  
(DUF1726, N=1)

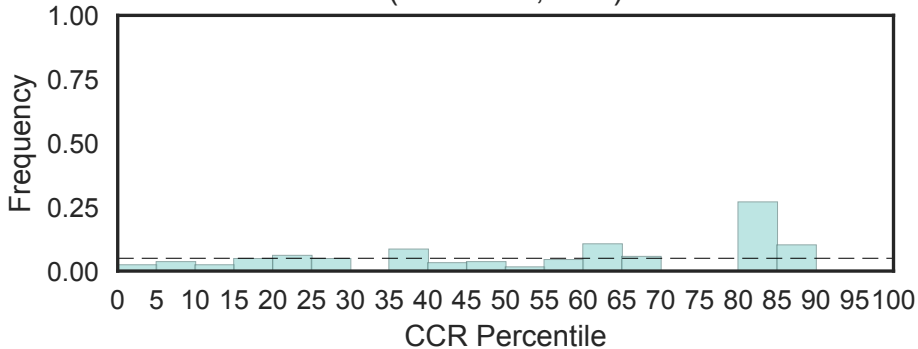

Domain of unknown function (DUF1731)  
(DUF1731, N=1)

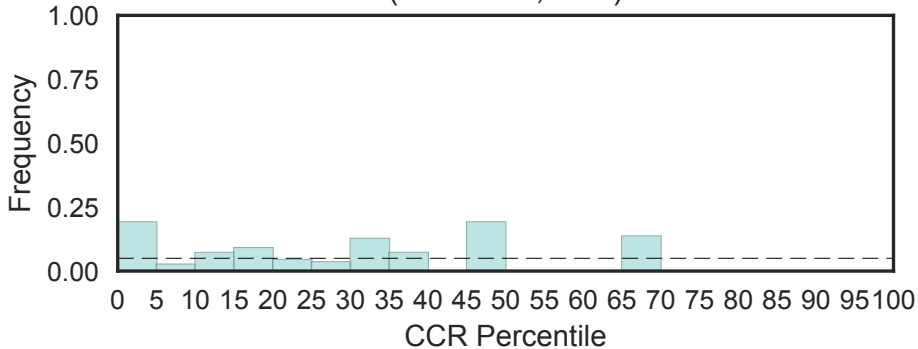



Domain of unknown function (DUF1736)  
(DUF1736, N=4)

Fisher's OR: 0; Bonferroni p-val: 1

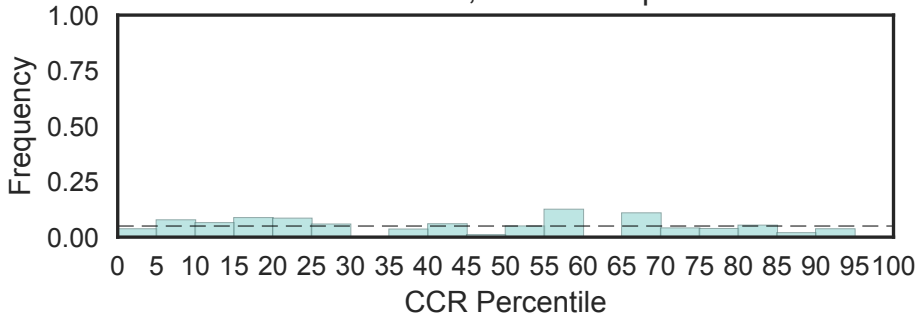

Domain of unknown function (DUF1741)  
(DUF1741, N=1)

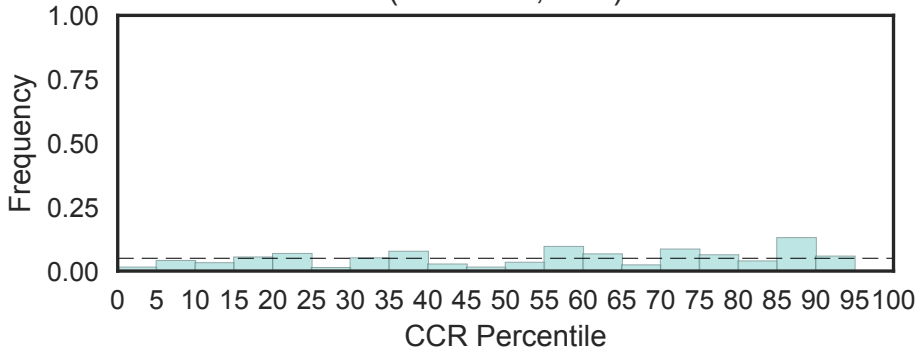

Domain of unknown function (DUF1744)  
(DUF1744, N=1)

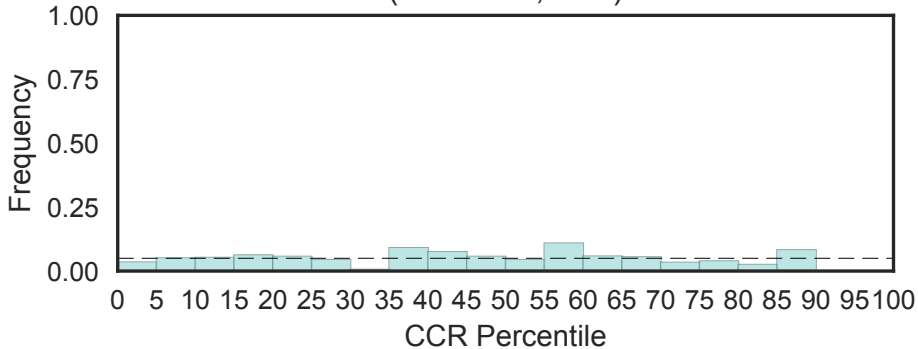

Eukaryotic integral membrane protein (DUF1751)  
(DUF1751, N=1)

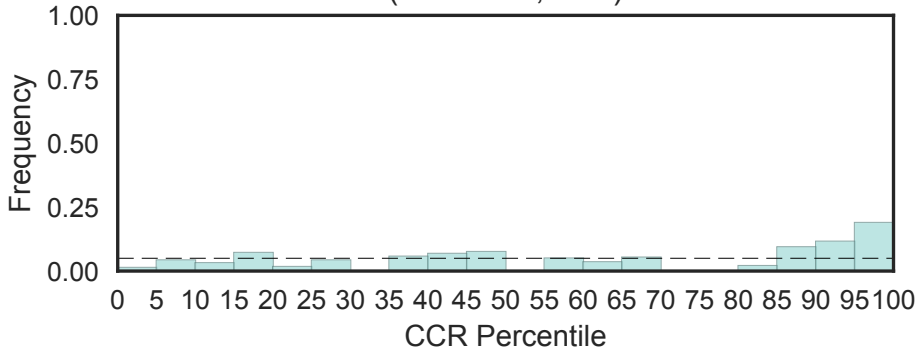

Eukaryotic family of unknown function (DUF1754)  
(DUF1754, N=1)

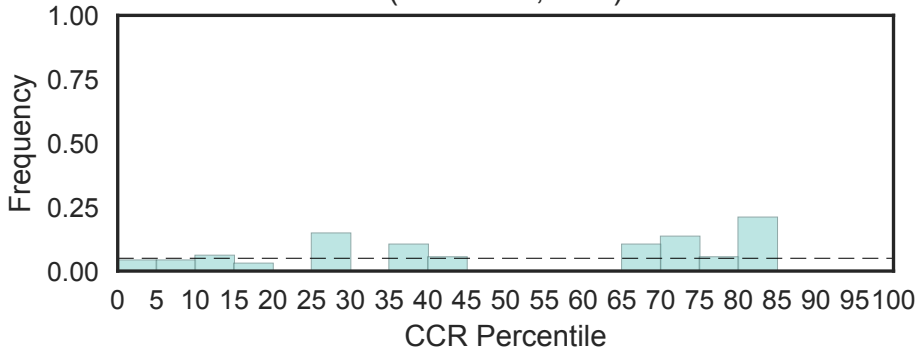

Domain of unknown function (DUF1771)  
(DUF1771, N=1)

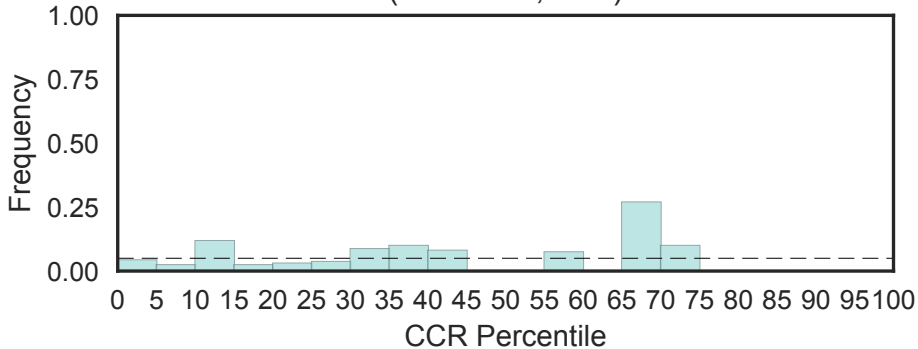

Fungal family of unknown function (DUF1776)  
(DUF1776, N=2)

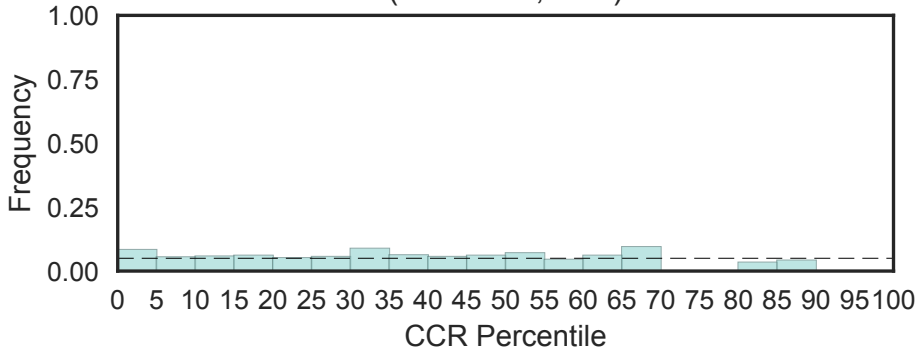

Protein of unknown function (DUF1777)  
(DUF1777, N=2)

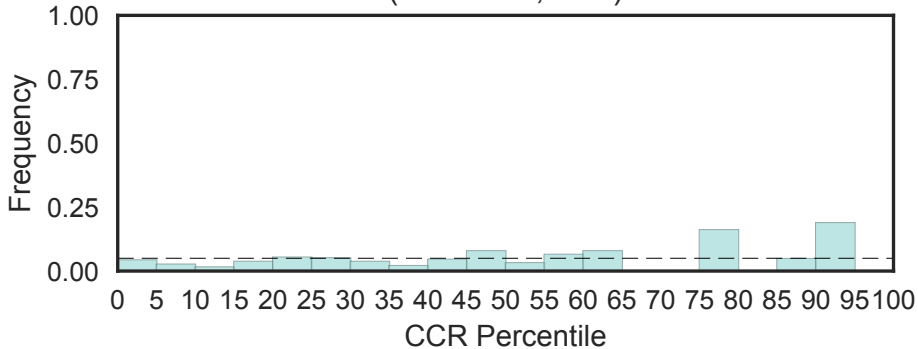



Domain of unknown function (DUF1794)  
(DUF1794, N=1)

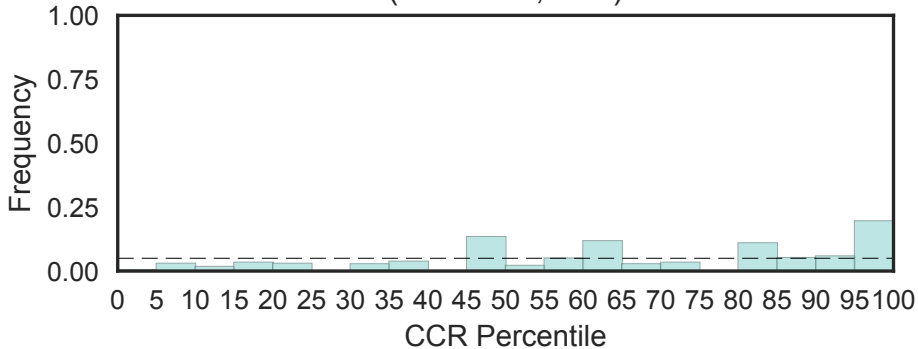

Domain of unknown function (DUF1856)  
(DUF1856, N=2)

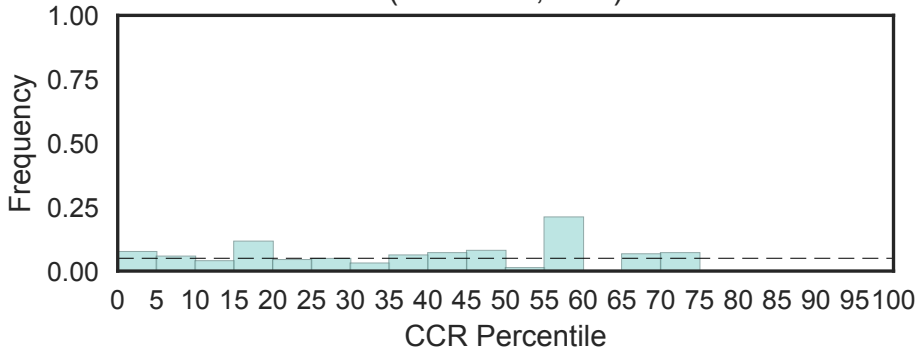

Domain of unknown function (DUF1866)  
(DUF1866, N=2)

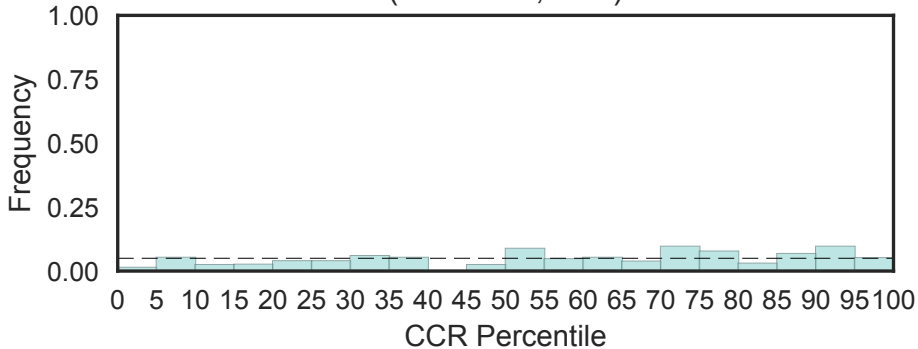

Domain of unknown function (DUF1891)  
(DUF1891, N=1)

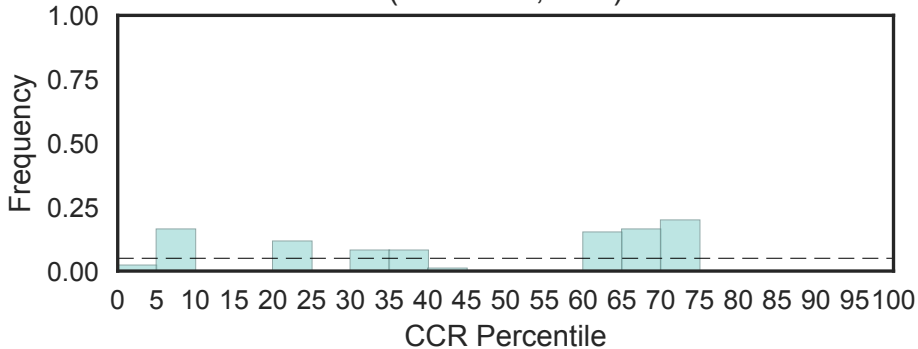

Domain of unknown function (DUF1897)  
(DUF1897, N=4)

Fisher's OR: 9.83; Bonferroni p-val: 1

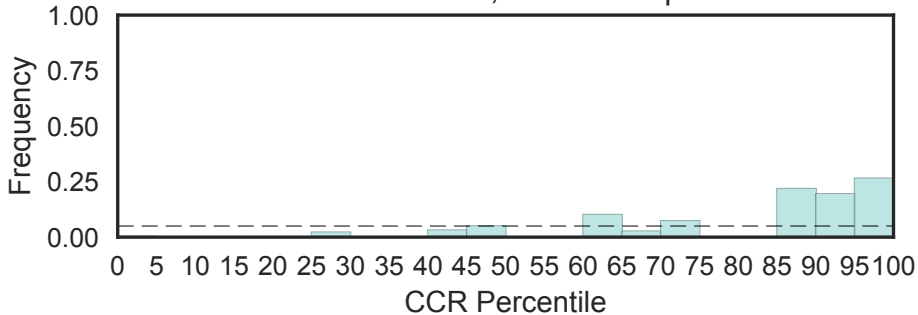

Domain of unknown function (DUF1899)  
(DUF1899, N=10)

Fisher's OR: 0.458; Bonferroni p-val: 1

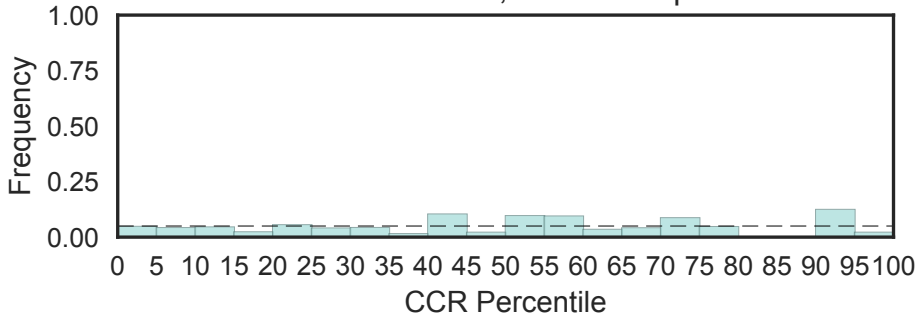

Domain of Unknown Function (DUF1907)  
(DUF1907, N=2)

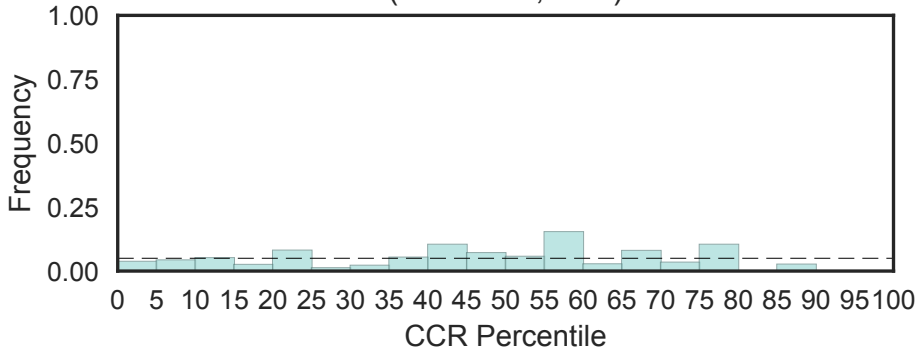

Domain of unknown function (DUF1908)  
(DUF1908, N=4)

Fisher's OR: 2.57; Bonferroni p-val: 1

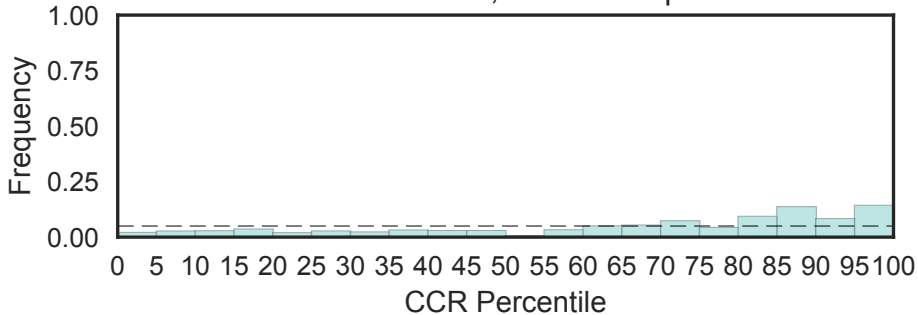



Domain of unknown function (DUF1917)  
(DUF1917, N=1)

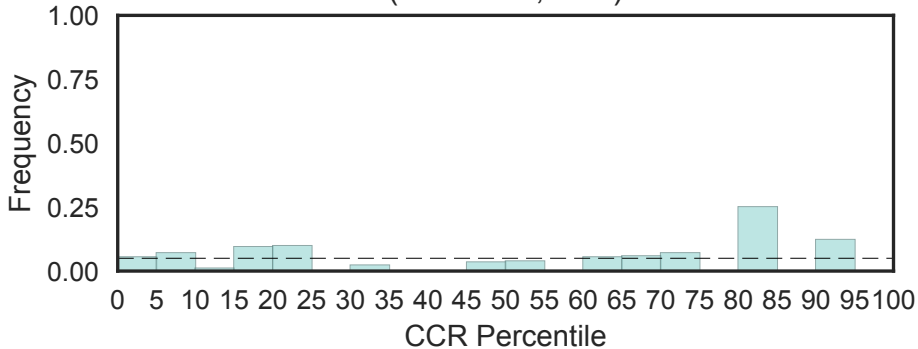

Domain of unknown function (DUF1943)  
(DUF1943, N=1)

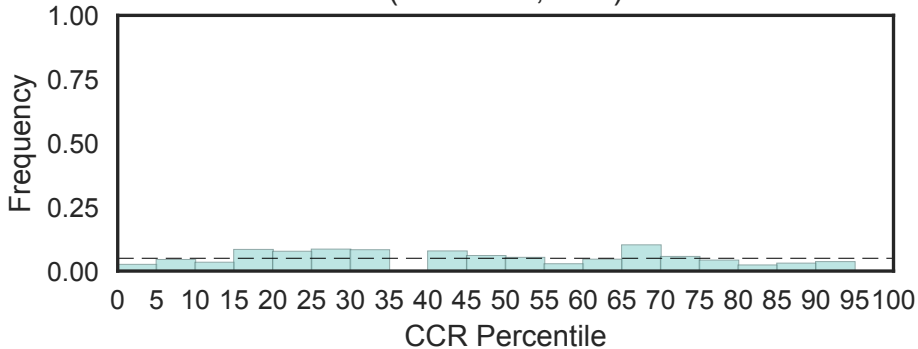

Domain of unknown function (DUF1977)  
(DUF1977, N=3)

Fisher's OR: 1.18; Bonferroni p-val: 1

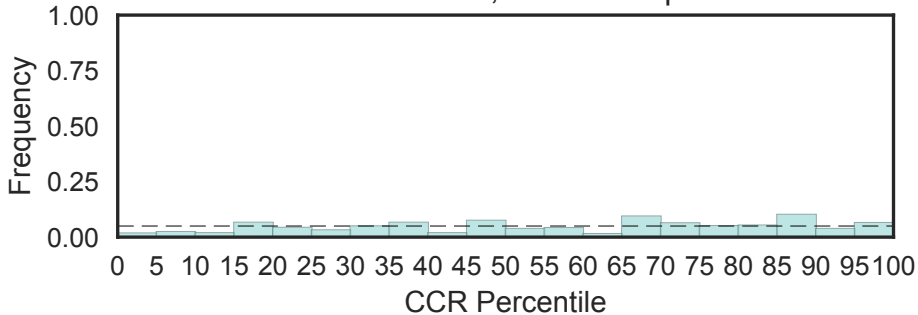

Domain of unknown function (DUF1981)  
(DUF1981, N=4)

Fisher's OR: 2.35; Bonferroni p-val: 1

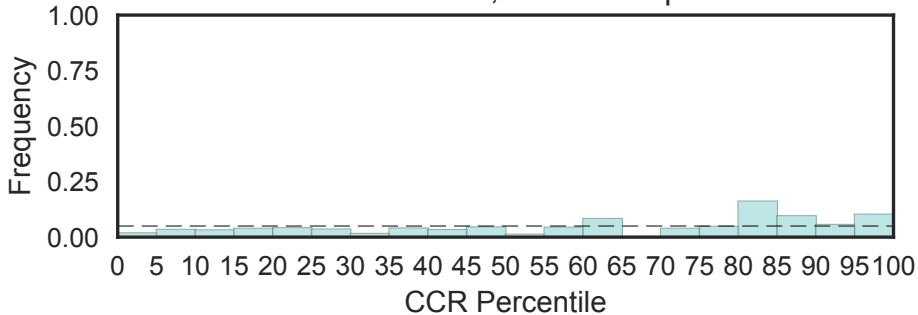

Domain of unknown function (DUF1986)  
(DUF1986, N=36)

Fisher's OR: 0.373; Bonferroni p-val: 1

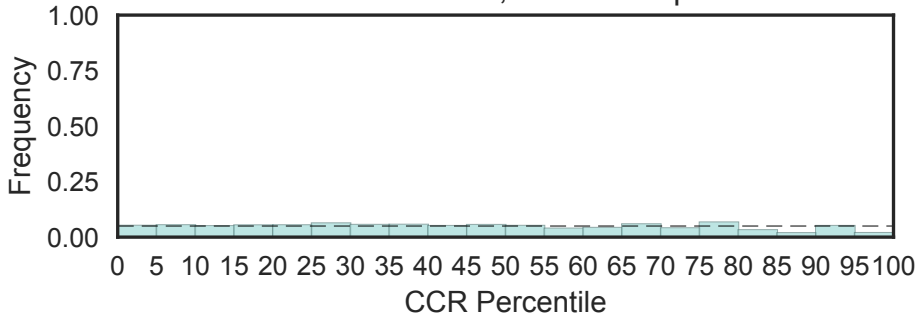

Domain of unknown function (DUF1992)  
(DUF1992, N=1)

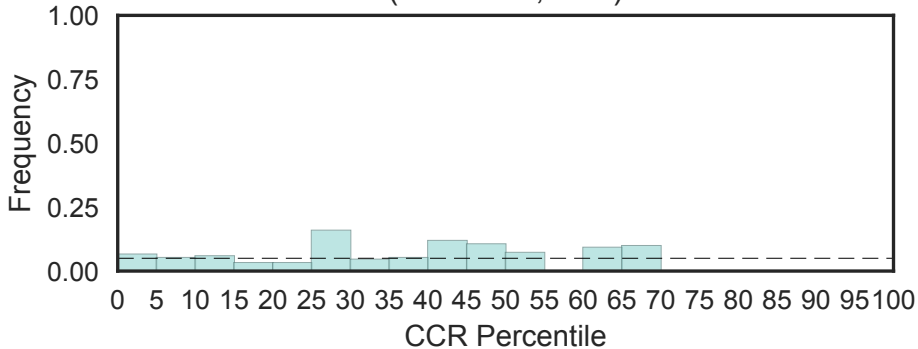

Eukaryotic protein of unknown function (DUF2003)  
(DUF2003, N=1)

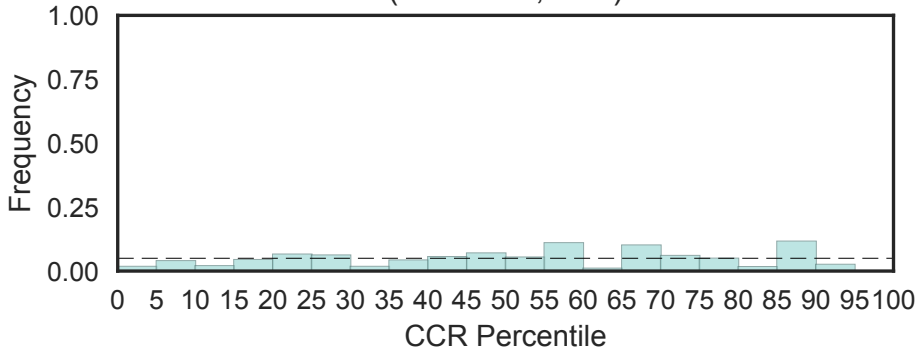

Protein of unknown function (DUF2012)  
(DUF2012, N=4)

Fisher's OR: 0; Bonferroni p-val: 1

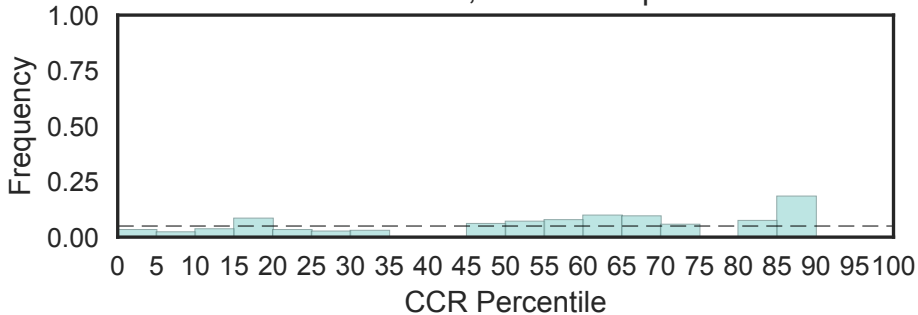



Protein of unknown function (DUF2013)  
(DUF2013, N=1)

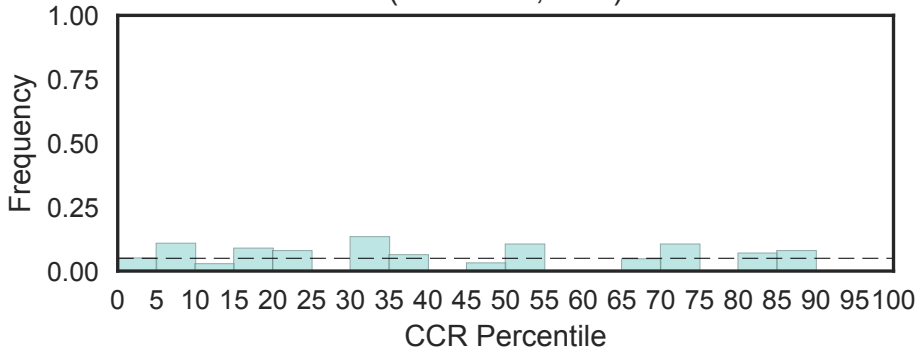

Domain of unknown function (DUF2028)  
(DUF2028, N=1)

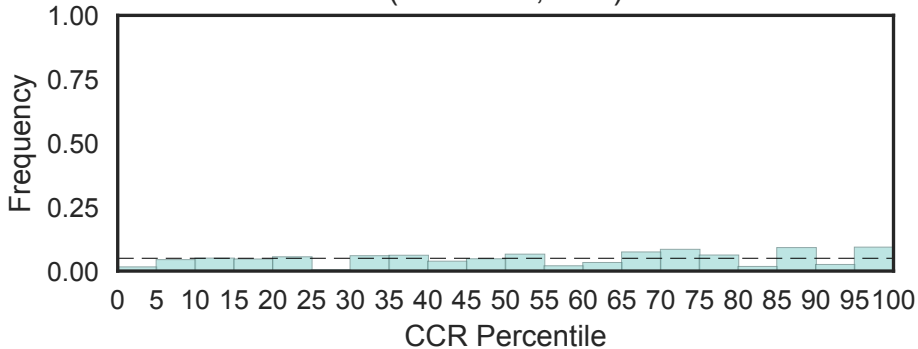

Uncharacterized conserved protein (DUF2039)  
(DUF2039, N=1)

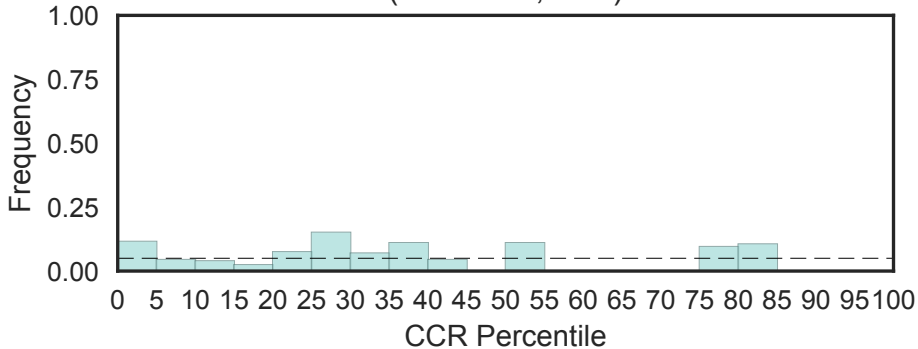

Coiled-coil domain-containing protein 55 (DUF2040)  
(DUF2040, N=1)

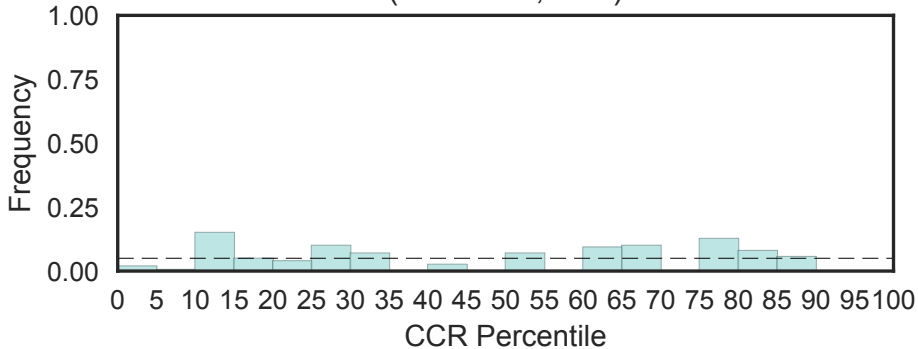

Uncharacterized conserved protein (DUF2043)  
(DUF2043, N=1)

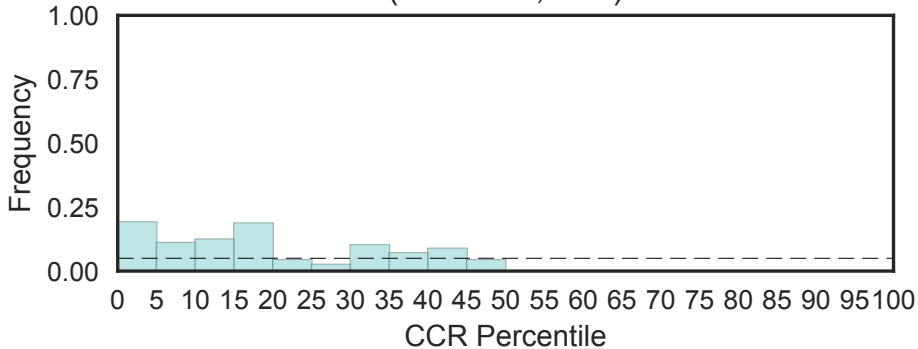

Uncharacterized conserved protein (DUF2045)  
(DUF2045, N=1)

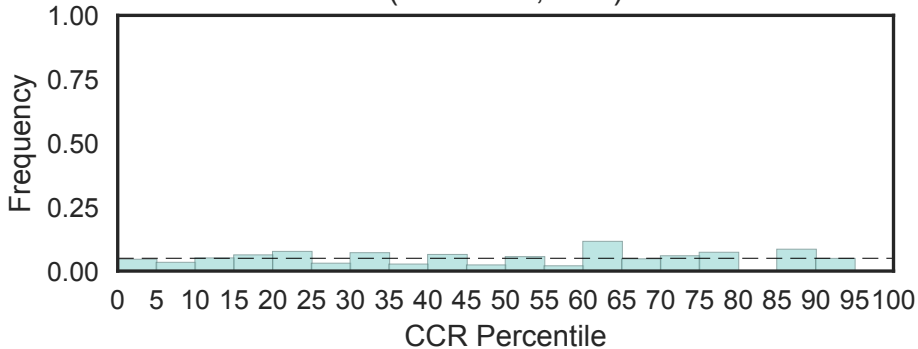

Uncharacterized conserved protein H4 (DUF2046)  
(DUF2046, N=1)

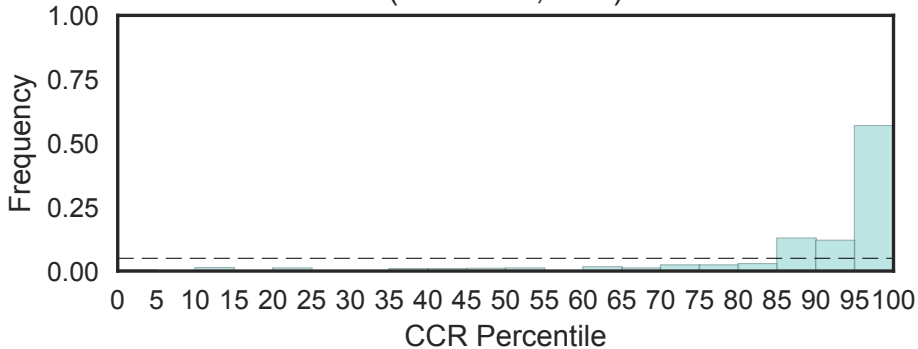

Abhydrolase domain containing 18  
(DUF2048, N=1)

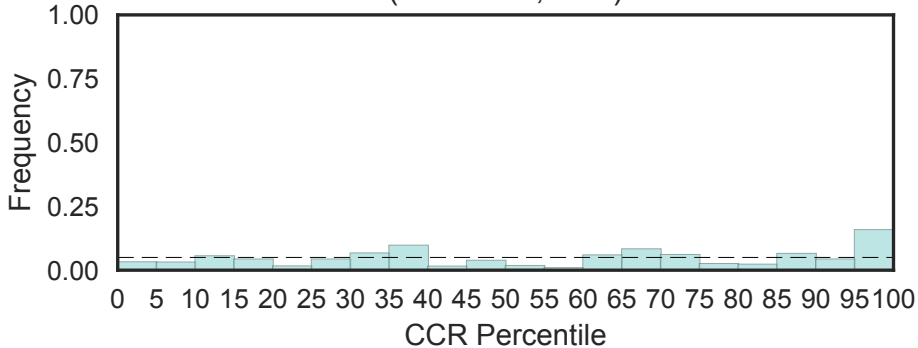



Coiled-coil domain containing protein (DUF2052)  
(DUF2052, N=1)

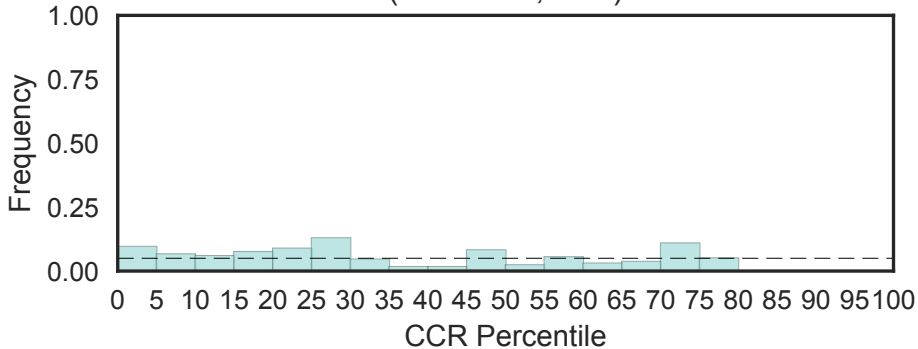

Predicted membrane protein (DUF2053)  
(DUF2053, N=1)

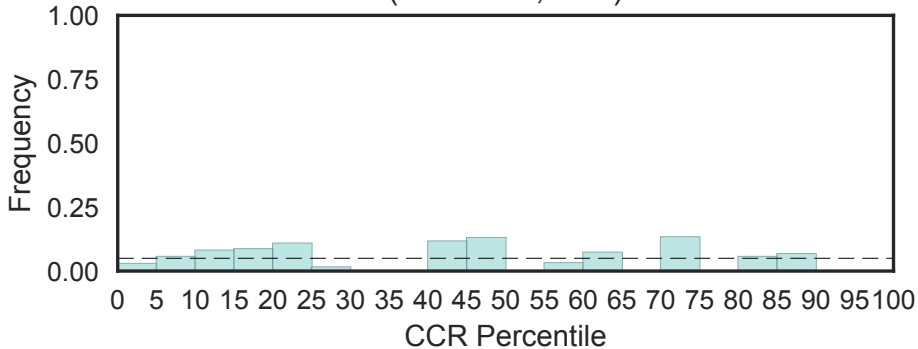

Uncharacterized conserved protein (DUF2054)  
(DUF2054, N=1)

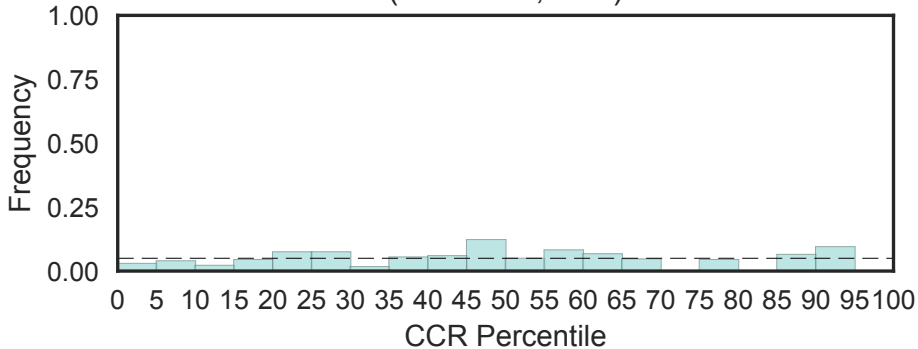

Uncharacterized conserved protein (DUF2075)  
(DUF2075, N=4)

Fisher's OR: 0; Bonferroni p-val: 1

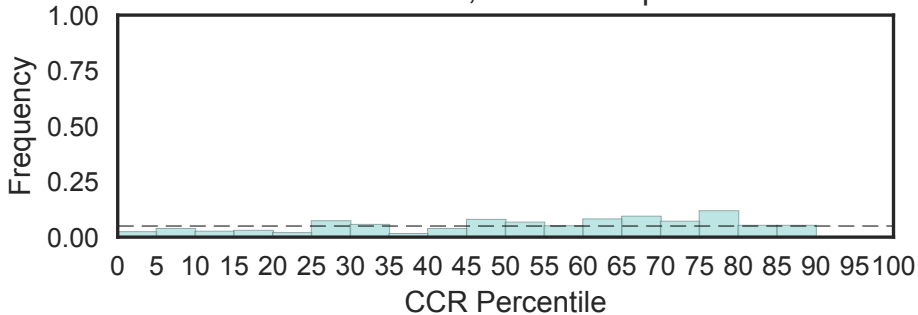

Domain of unknown function DUF21  
(DUF21, N=3)

Fisher's OR: 10.5; Bonferroni p-val: 0.0535

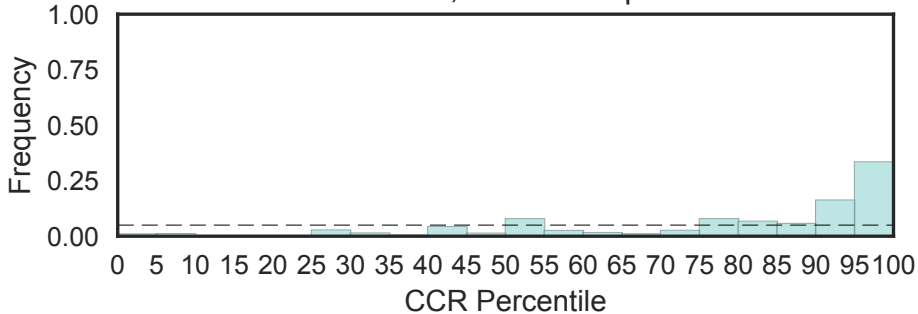

Cell cycle and development regulator  
(DUF2151, N=2)

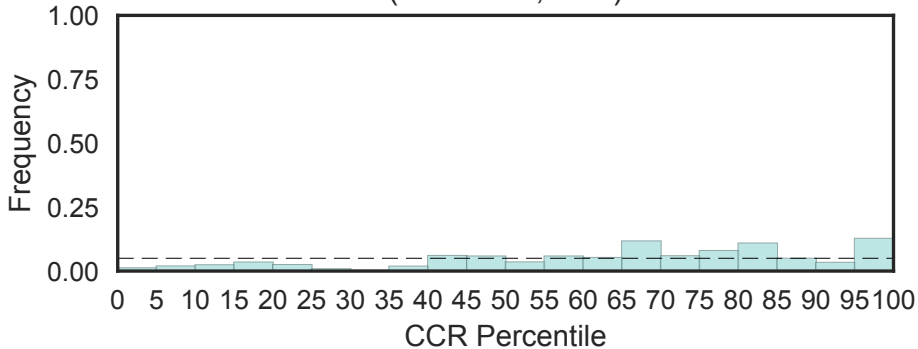

Uncharacterized conserved protein (DUF2181)  
(DUF2181, N=3)

Fisher's OR: 0; Bonferroni p-val: 1

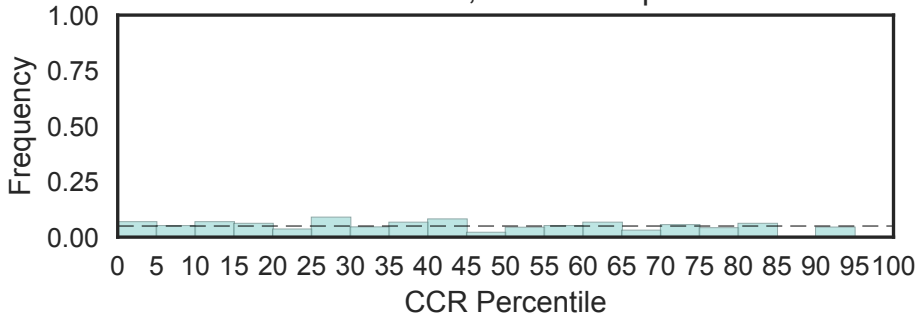

Predicted coiled-coil protein (DUF2205)  
(DUF2205, N=1)

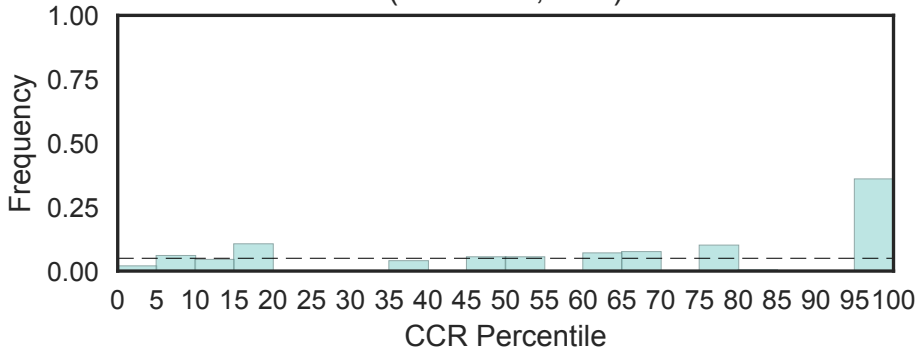



Uncharacterized protein conserved in bacteria (DUF2225)  
(DUF2225, N=1)

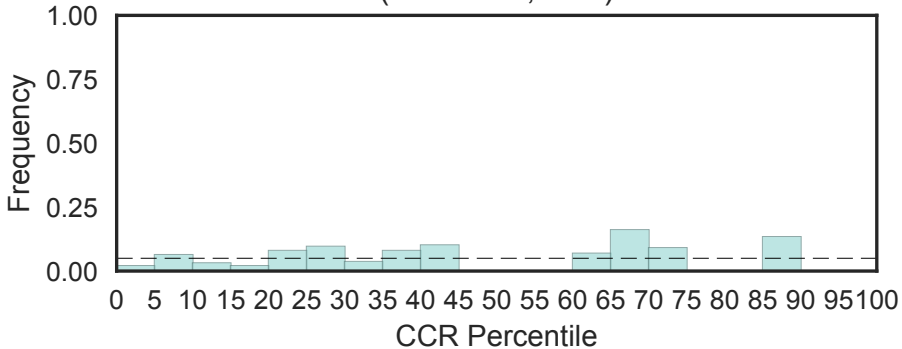

Uncharacterised conserved protein (DUF2315)  
(DUF2315, N=3)

Fisher's OR: 0; Bonferroni p-val: 1

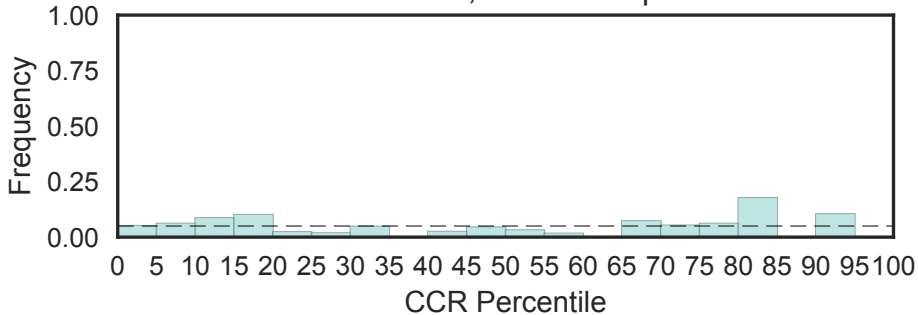

Uncharacterized conserved protein (DUF2340)  
(DUF2340, N=1)

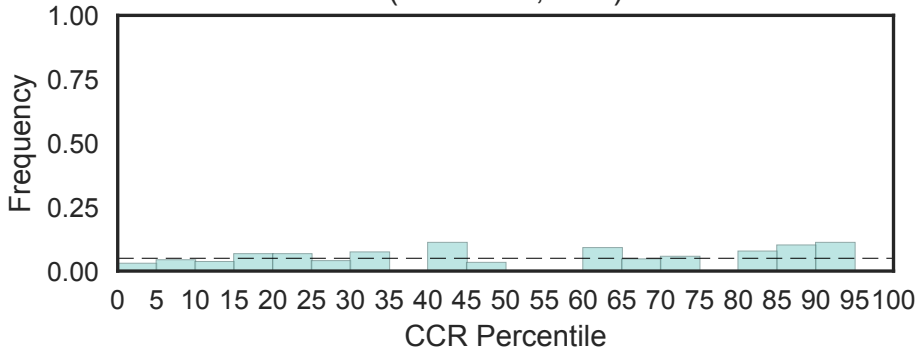

Uncharacterized conserved protein (DUF2347)  
(DUF2347, N=2)

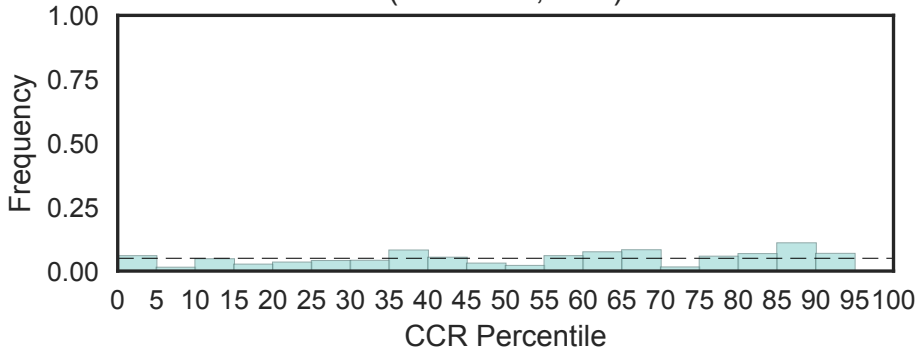

Uncharacterized coiled-coil protein (DUF2353)  
(DUF2353, N=1)

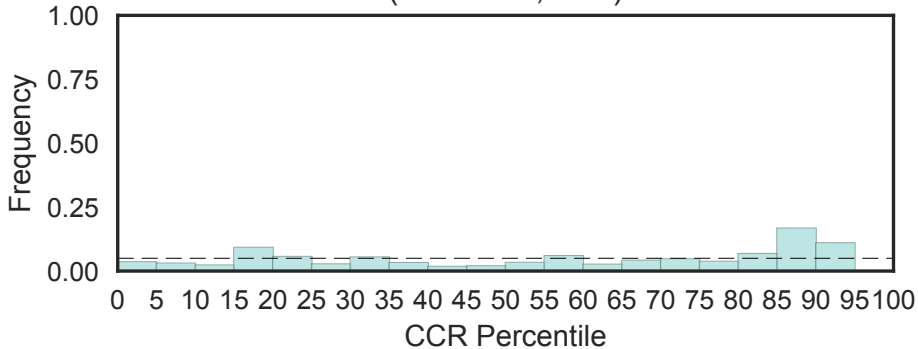

Uncharacterized conserved protein (DUF2362)  
(DUF2362, N=1)

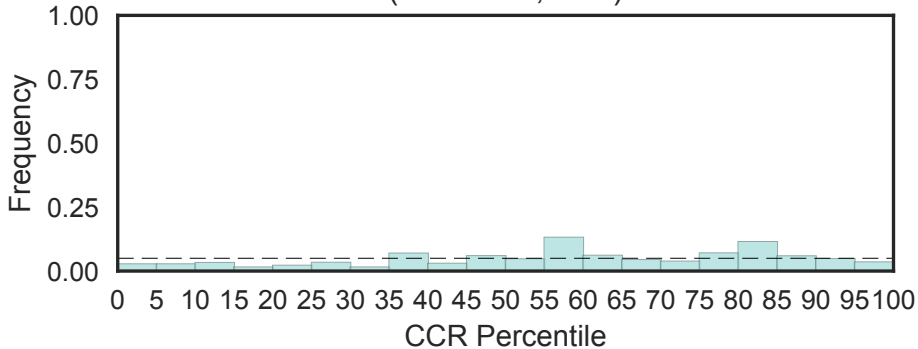

Uncharacterized conserved protein (DUF2363)  
(DUF2363, N=1)

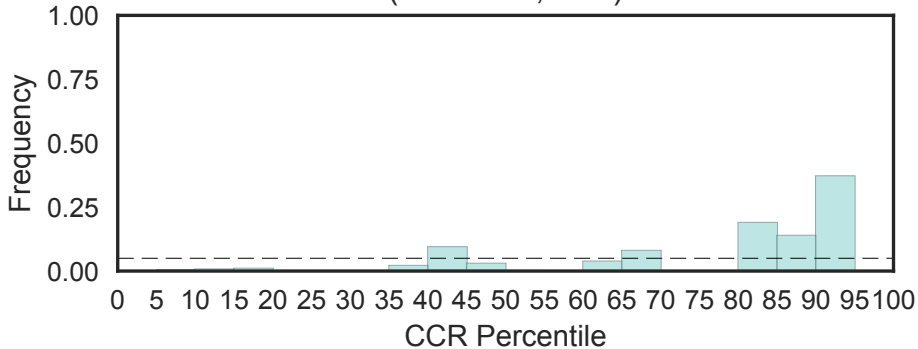

Uncharacterized conserved protein (DUF2367)  
(DUF2367, N=1)

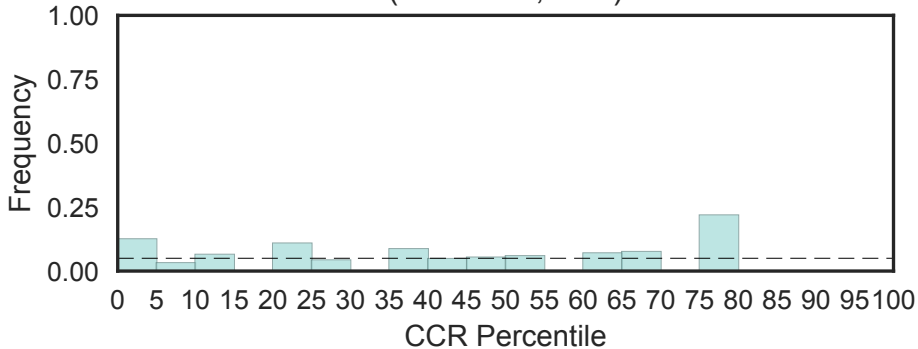



Uncharacterised conserved protein (DUF2368)  
(DUF2368, N=1)

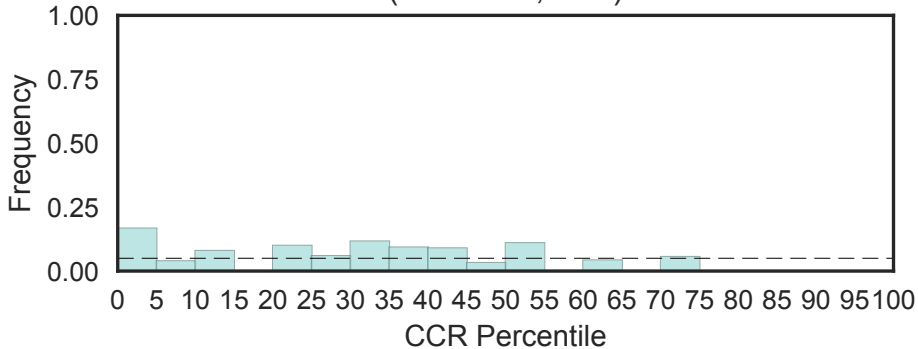

Uncharacterised conserved protein (DUF2369)  
(DUF2369, N=1)

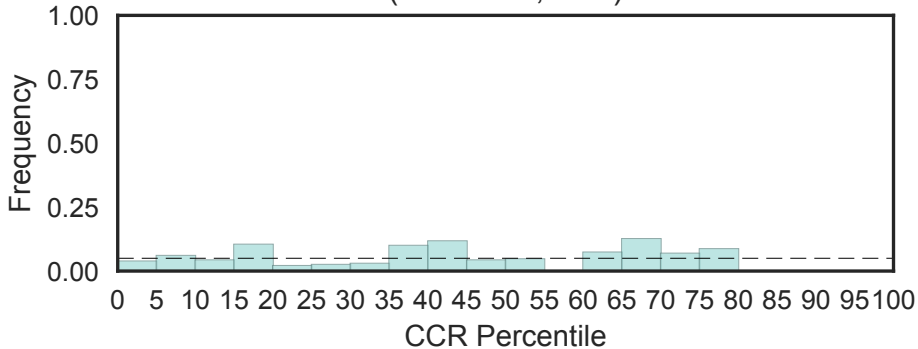

Protein of unknown function (DUF2370)  
(DUF2370, N=1)

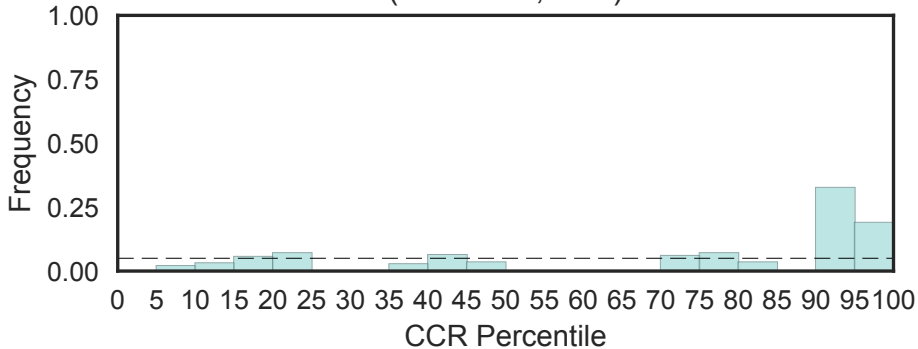

Uncharacterised conserved protein (DUF2371)  
(DUF2371, N=3)

Fisher's OR: 0; Bonferroni p-val: 1

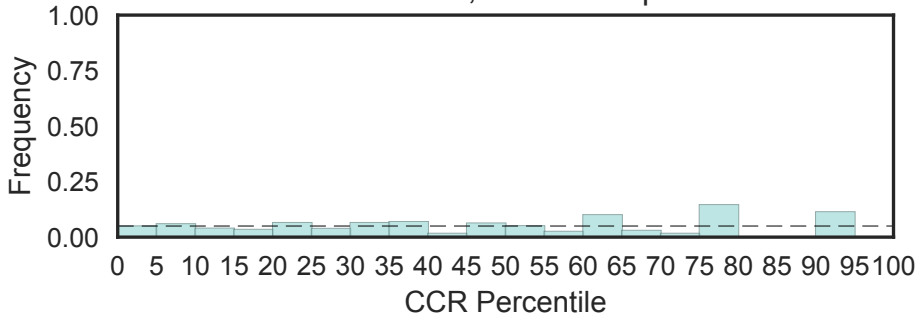

Uncharacterised conserved protein (DUF2373)  
(DUF2373, N=1)

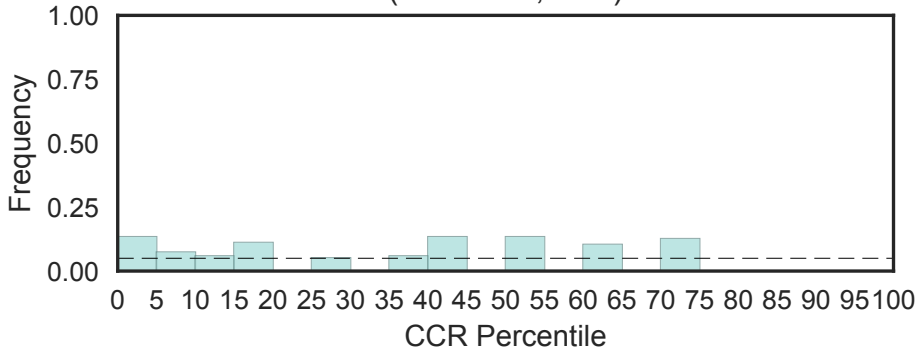

Putative death-receptor fusion protein (DUF2428)  
(DUF2428, N=1)

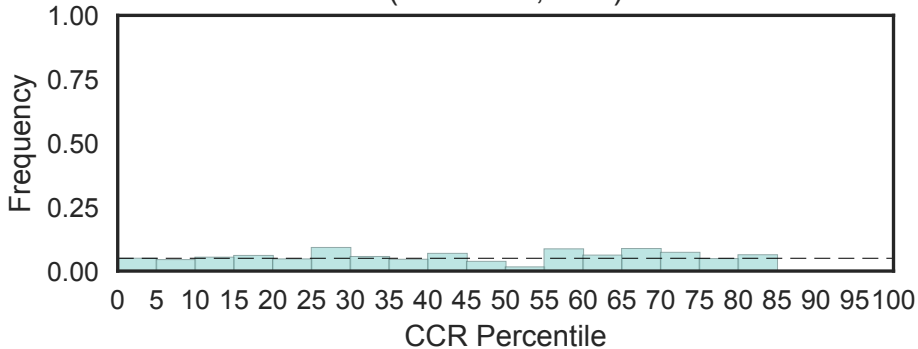

Domain of unknown function (DUF2431)  
(DUF2431, N=1)

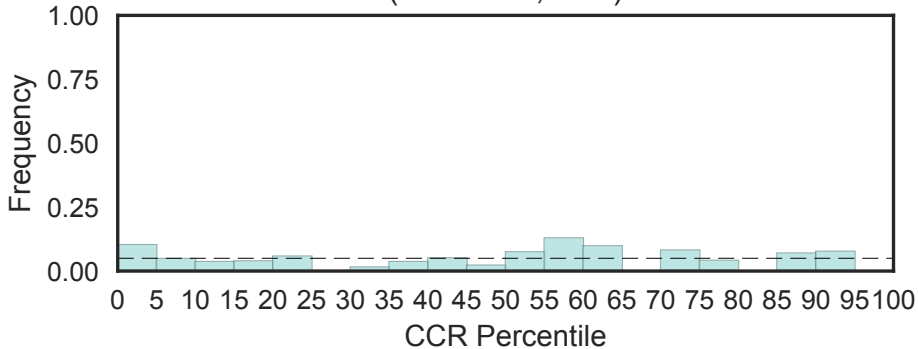

Protein of unknown function (DUF2439)  
(DUF2439, N=1)

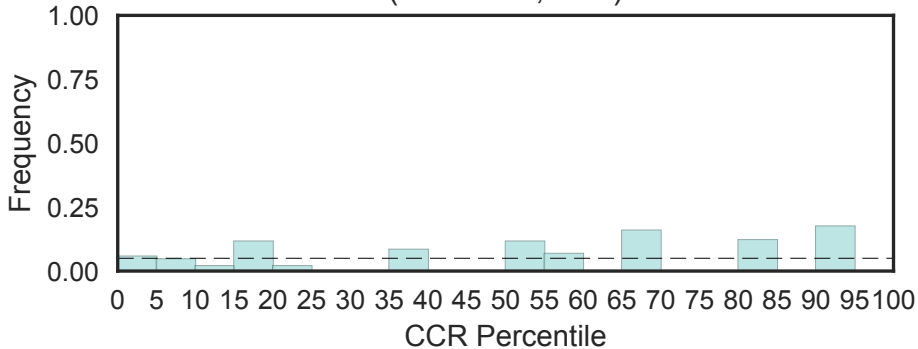



Protein of unknown function C-terminus (DUF2448)  
(DUF2448, N=1)

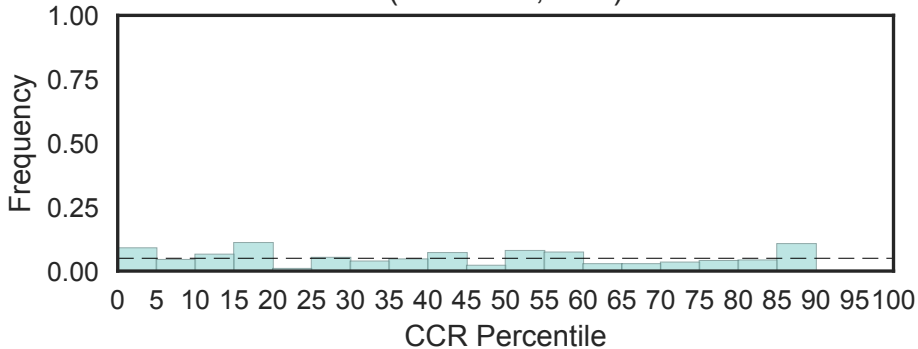

Protein of unknown function C-terminus (DUF2451)  
(DUF2451, N=1)

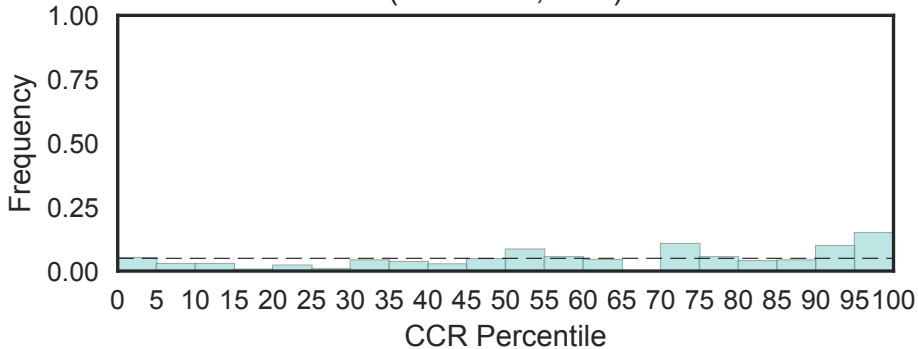

Protein of unknown function (DUF2452)  
(DUF2452, N=1)

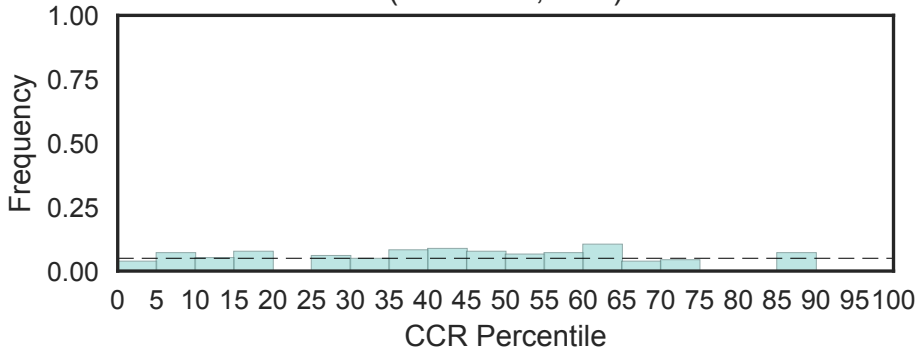

Protein of unknown function (DUF2462)  
(DUF2462, N=1)

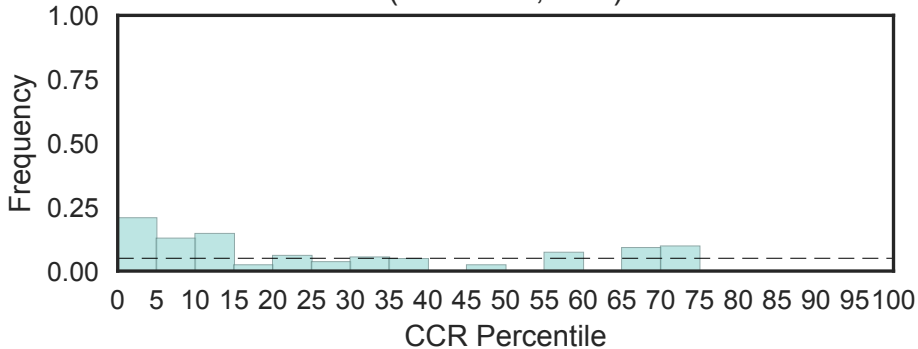

Multivesicular body subunit 12  
(DUF2464, N=2)

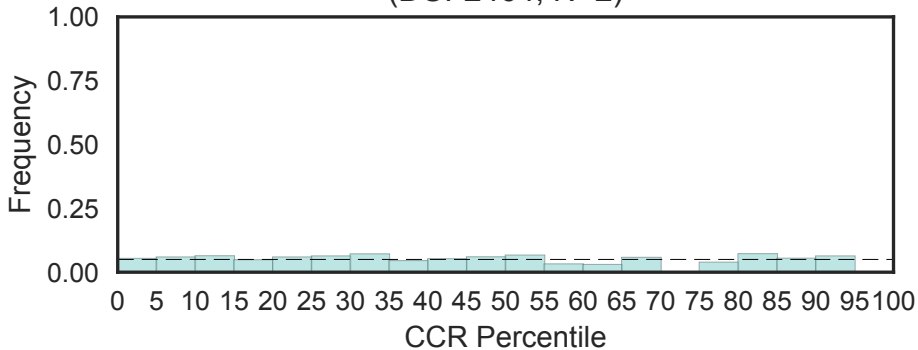

Protein of unknown function (DUF2465)  
(DUF2465, N=3)

Fisher's OR: 0.629; Bonferroni p-val: 1

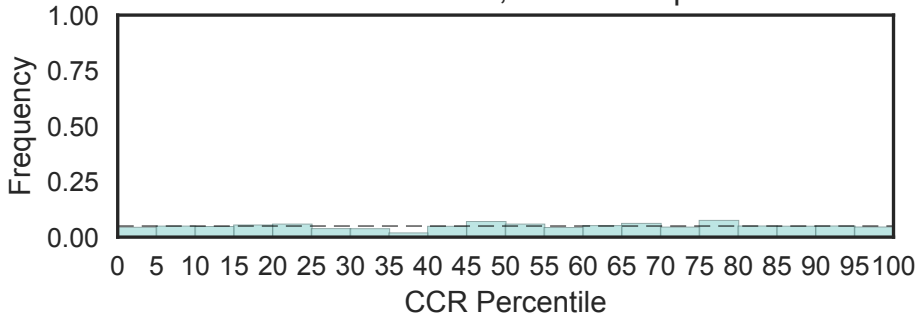

Protein of unknown function (DUF2475)  
(DUF2475, N=4)

Fisher's OR: 0; Bonferroni p-val: 1

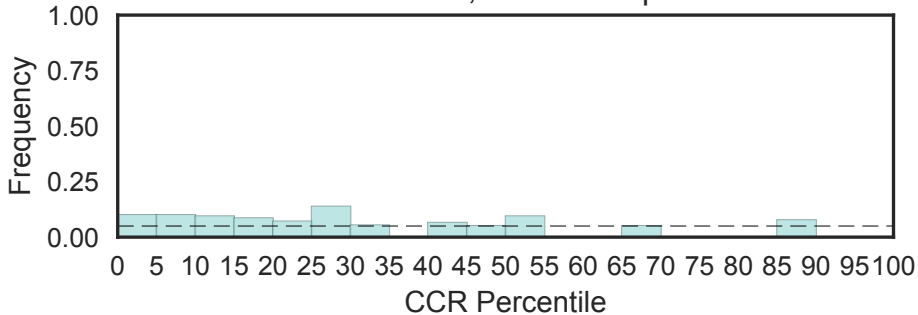

Protein of unknown function (DUF2477)  
(DUF2477, N=1)

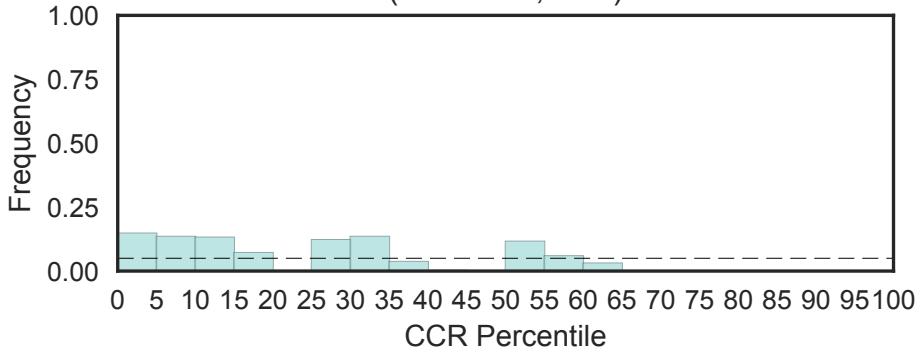



Protein of unknown function (DUF2615)  
(DUF2615, N=1)

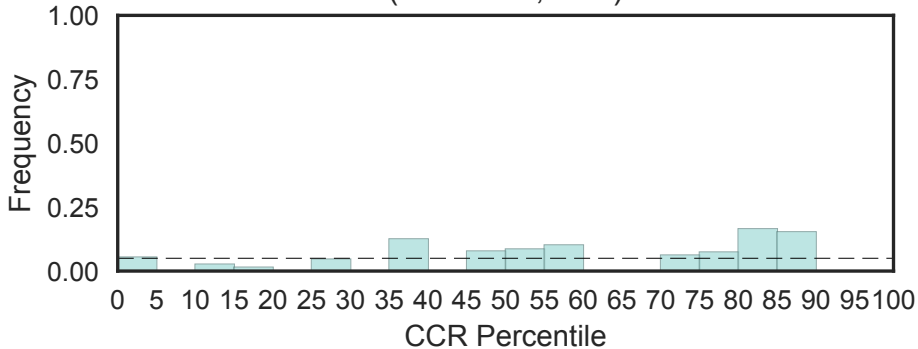

Protein of unknown function (DUF2678)  
(DUF2678, N=1)

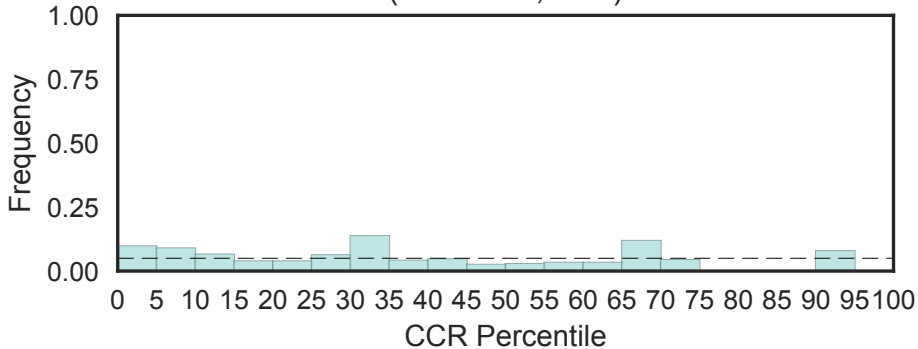

Protein of unknown function (DUF2723)  
(DUF2723, N=1)

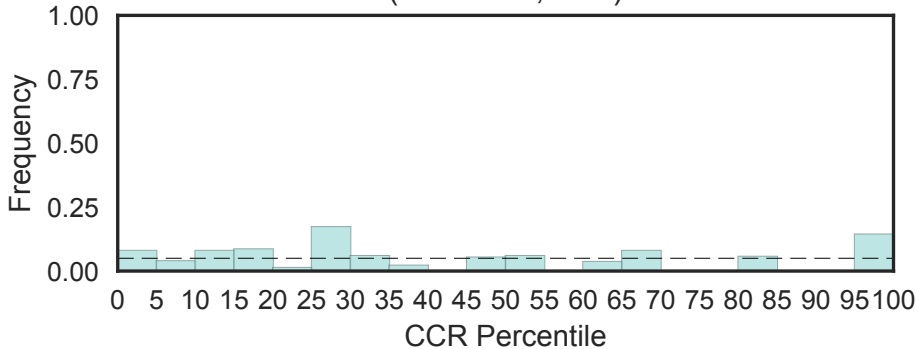

Protein of unknown function (DUF2781)  
(DUF2781, N=3)

Fisher's OR: 0; Bonferroni p-val: 1

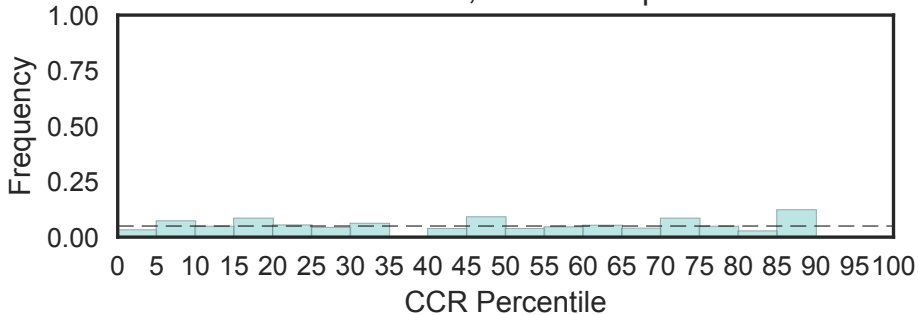

Protein of unknown function (DUF2817)  
(DUF2817, N=1)

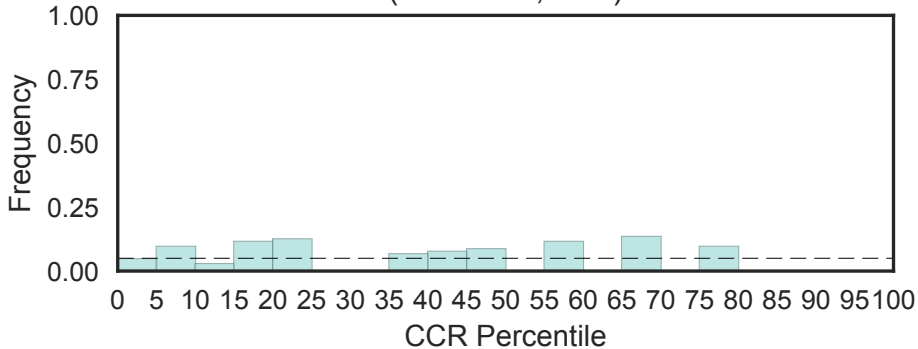

Protein of unknown function (DUF2870)  
(DUF2870, N=3)

Fisher's OR: 0; Bonferroni p-val: 1

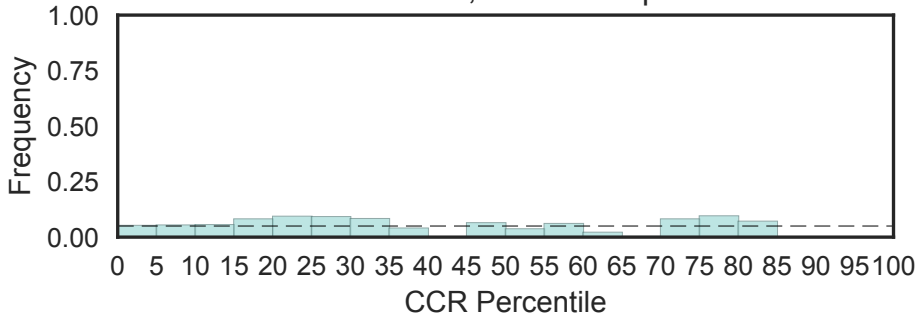

Protein of unknown function (DUF3128)  
(DUF3128, N=1)

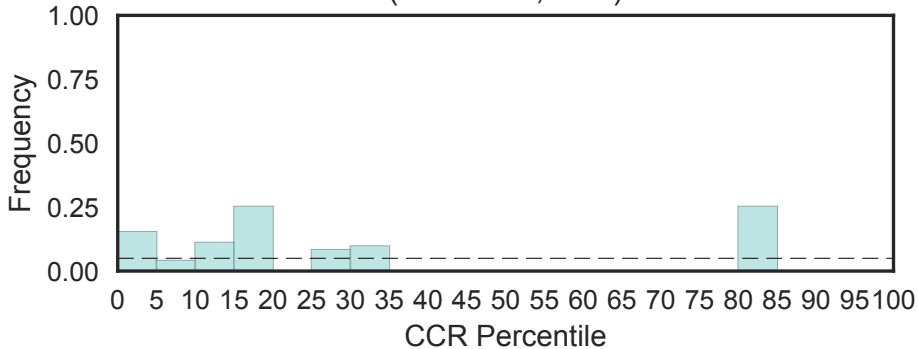

Protein of unknown function (DUF3314)  
(DUF3314, N=1)

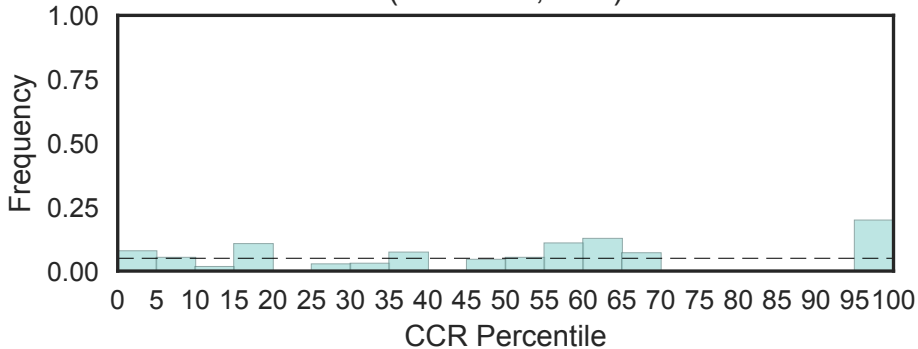



Domain of unknown function (DUF3337)  
(DUF3337, N=1)

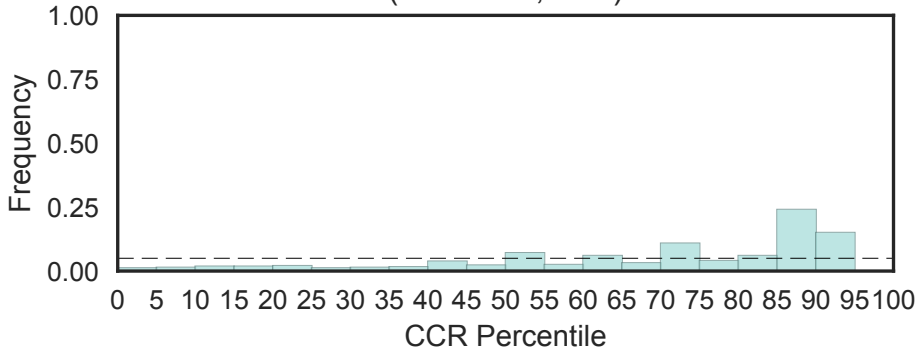

Domain of unknown function (DUF3338)  
(DUF3338, N=3)

Fisher's OR: 0; Bonferroni p-val: 1

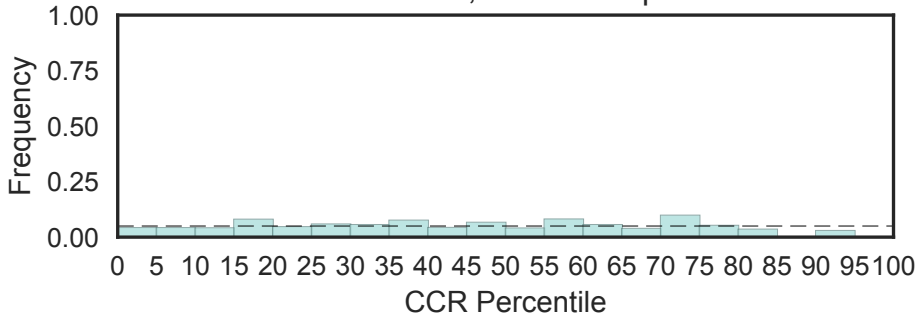

Domain of unknown function (DUF3342)  
(DUF3342, N=6)

Fisher's OR: 5.32; Bonferroni p-val: 1

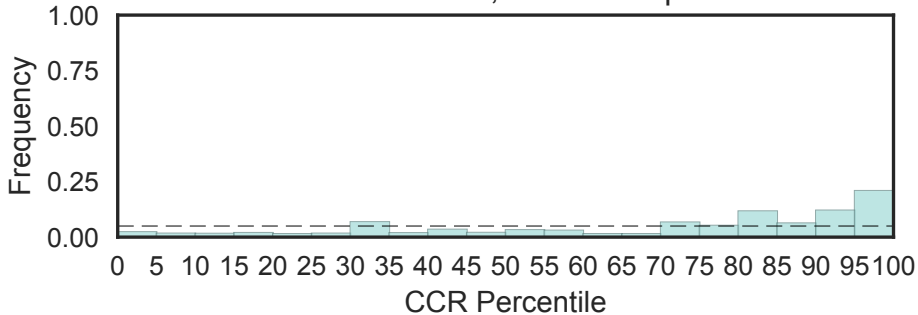

Domain of unknown function (DUF3350)  
(DUF3350, N=2)

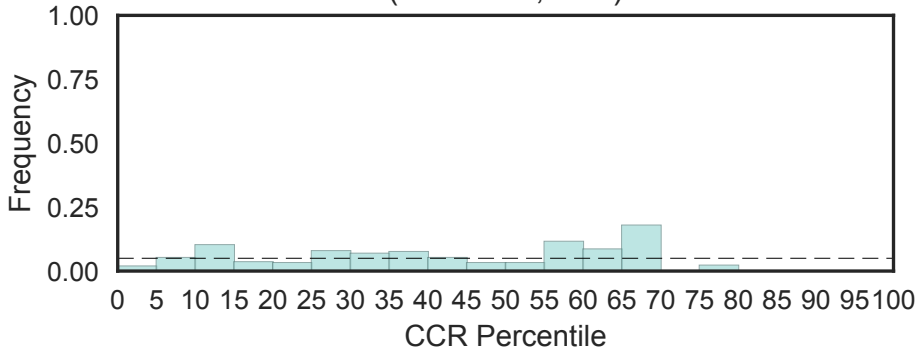

Domain of unknown function (DUF3361)  
(DUF3361, N=3)

Fisher's OR: 1.83; Bonferroni p-val: 1

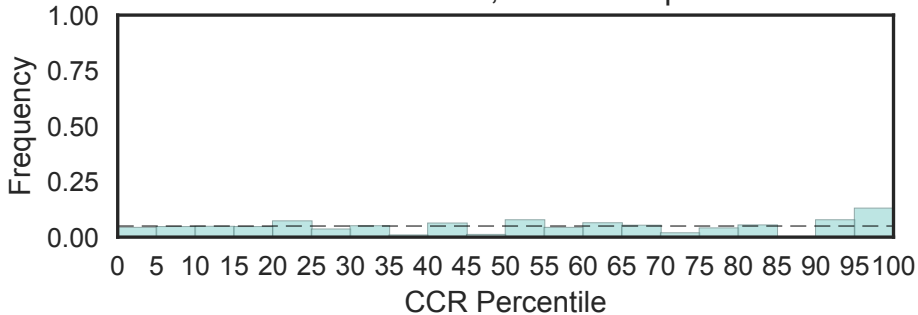

Domain of unknown function (DUF3371)  
(DUF3371, N=3)

Fisher's OR: 0.726; Bonferroni p-val: 1

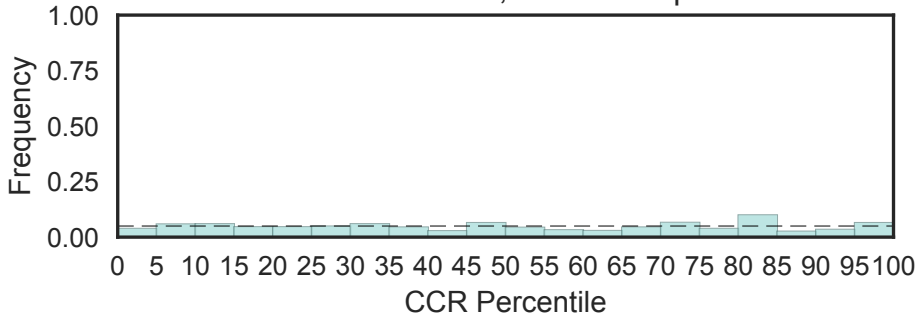

Domain of unknown function (DUF3377)  
(DUF3377, N=4)

Fisher's OR: 1.21; Bonferroni p-val: 1

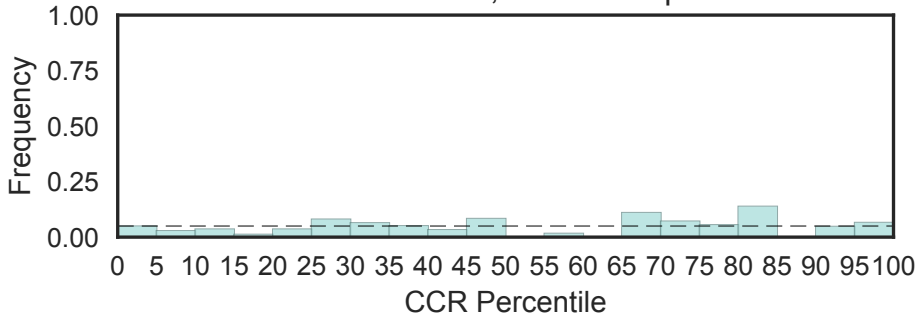

Domain of unknown function (DUF3381)  
(DUF3381, N=1)

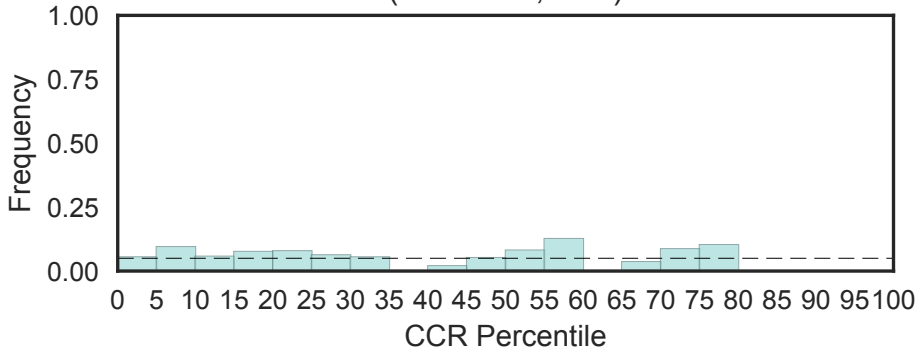



Domain of unknown function (DUF3384)  
(DUF3384, N=1)

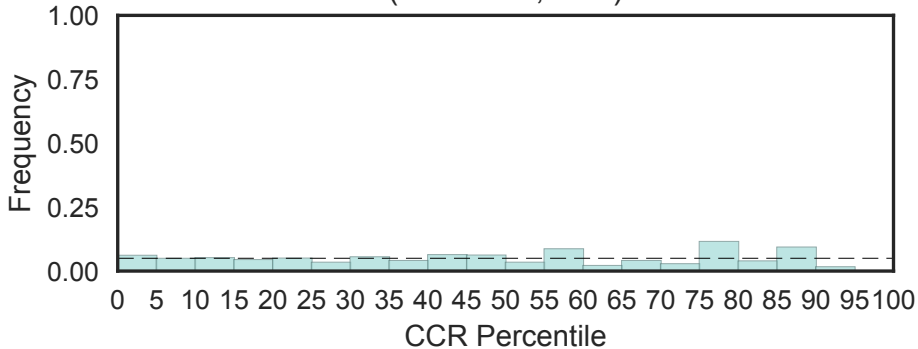

Domain of unknown function (DUF3385)  
(DUF3385, N=1)

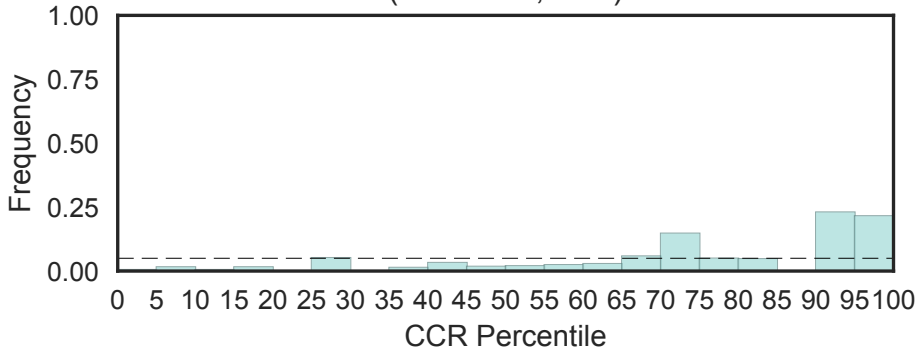

Domain of unknown function (DUF3395)  
(DUF3395, N=1)

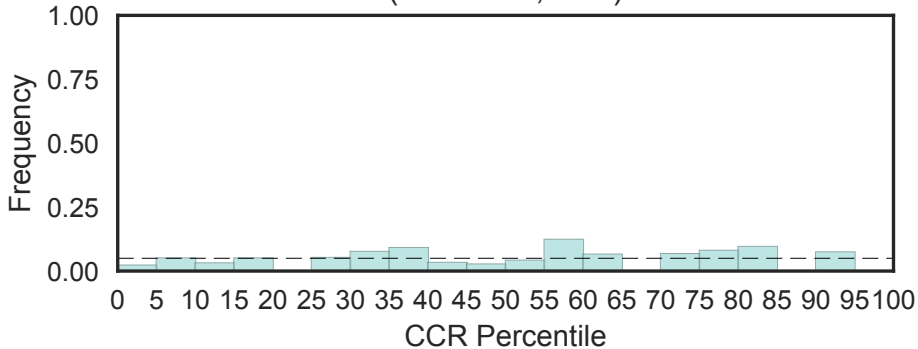

Domain of unknown function (DUF3398)  
(DUF3398, N=5)

Fisher's OR: 1.97; Bonferroni p-val: 1

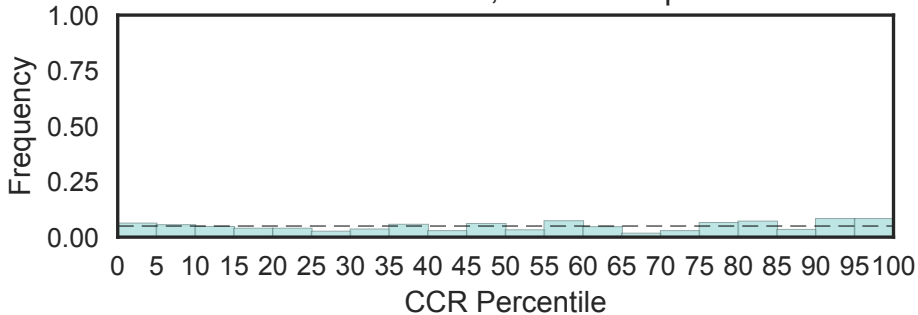

Domain of unknown function (DUF3399)  
(DUF3399, N=2)

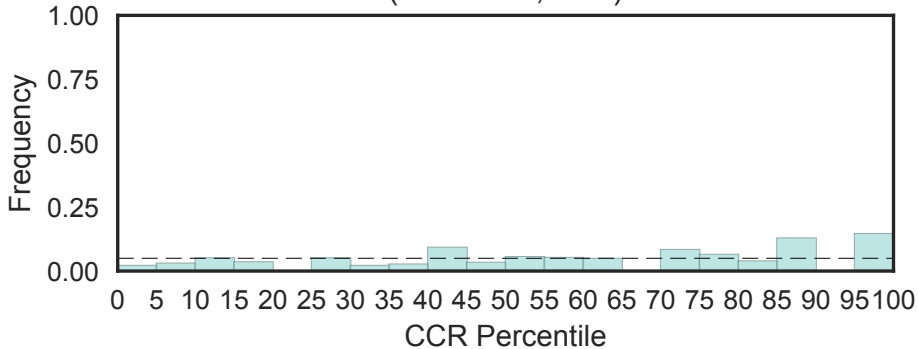

Domain of unknown function (DUF3402)  
(DUF3402, N=2)

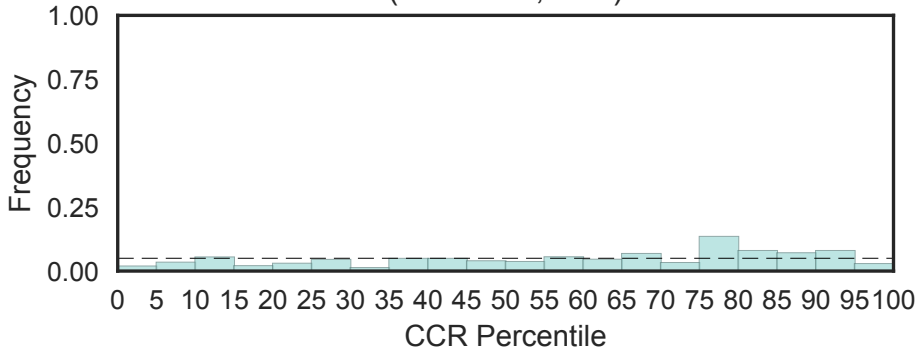

Protein of unknown function (DUF3429)  
(DUF3429, N=1)

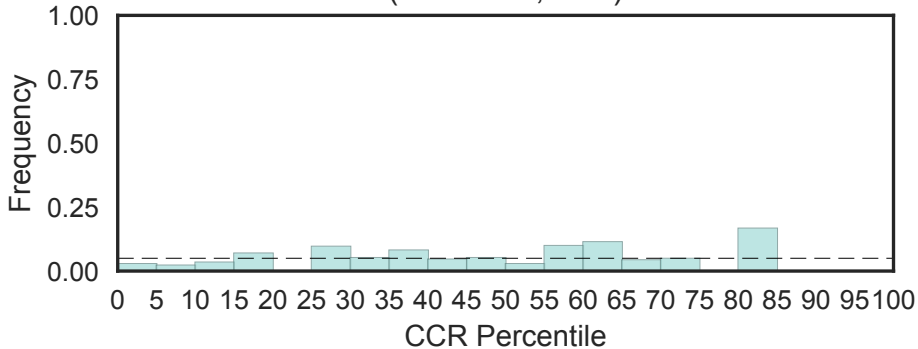

Domain of unknown function (DUF3432)  
(DUF3432, N=1)

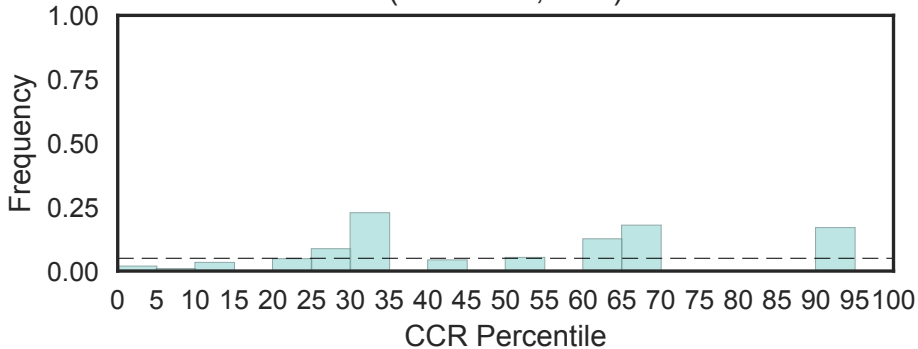



Domain of unknown function (DUF3437)  
(DUF3437, N=1)

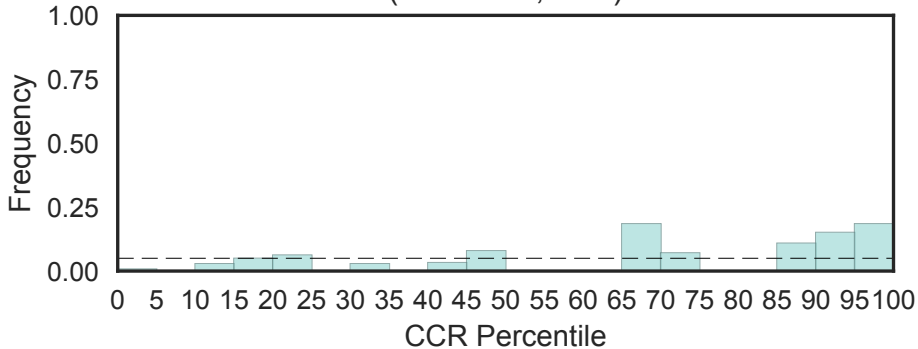

Domain of unknown function (DUF3441)  
(DUF3441, N=1)

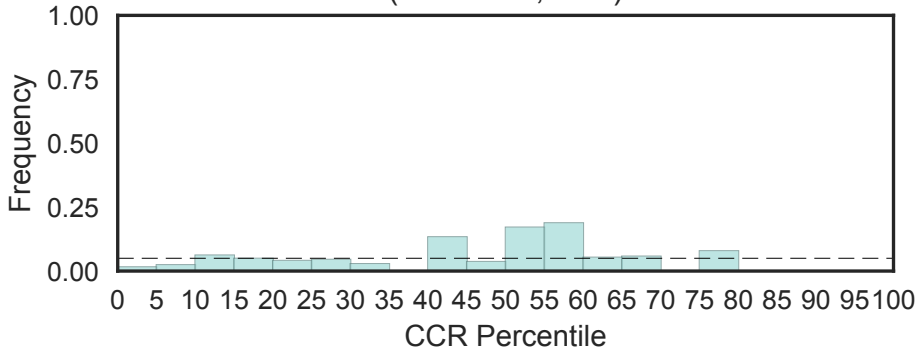

Domain of unknown function (DUF3446)  
(DUF3446, N=3)

Fisher's OR: 1.48; Bonferroni p-val: 1

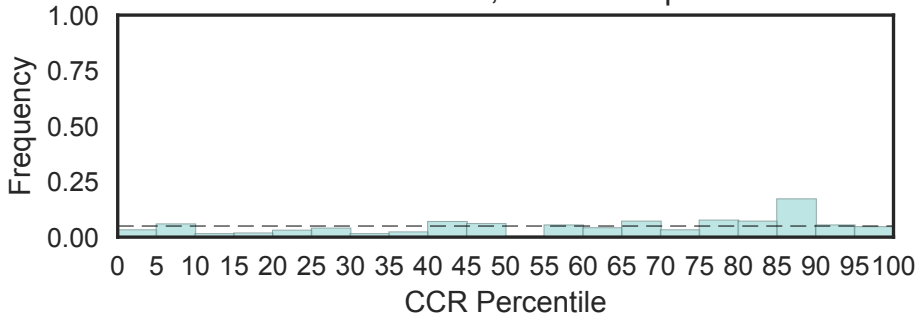

Domain of unknown function (DUF3449)  
(DUF3449, N=1)

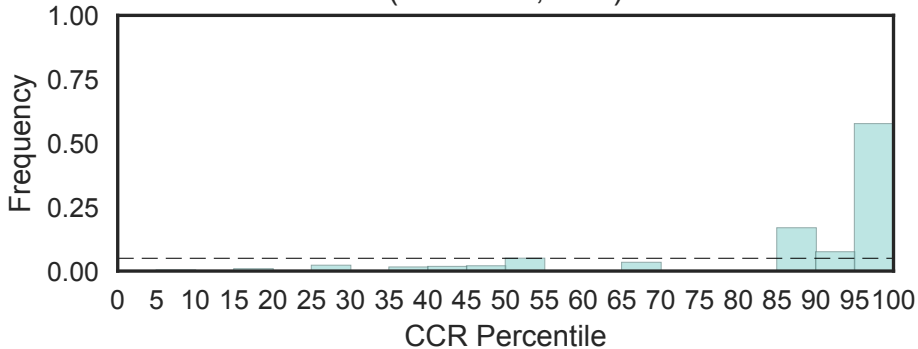

Domain of unknown function (DUF3452)  
(DUF3452, N=3)

Fisher's OR: 0; Bonferroni p-val: 1

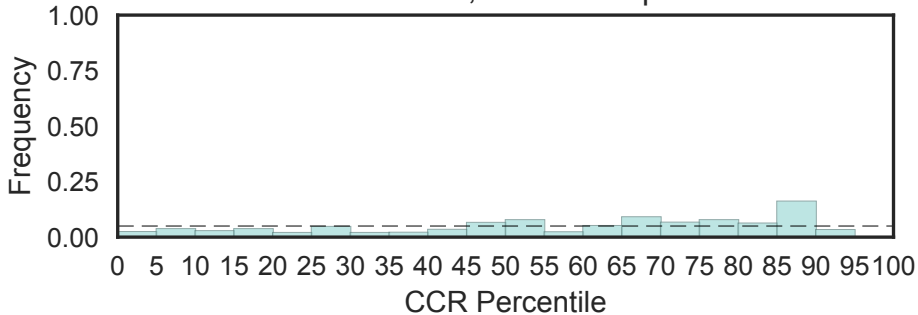

Domain of unknown function (DUF3453)  
(DUF3453, N=1)

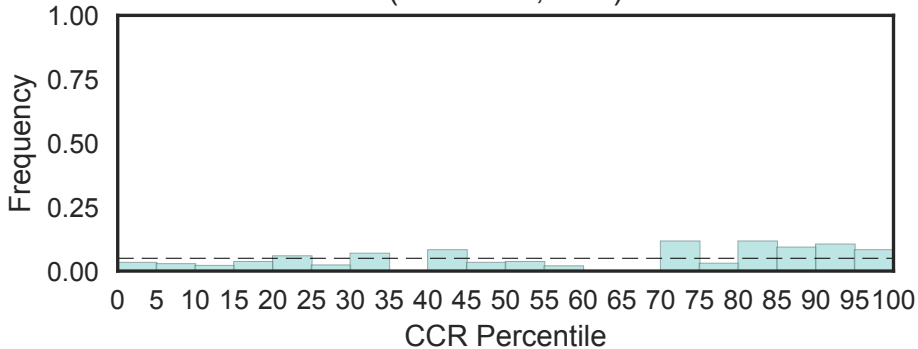

Domain of unknown function (DUF3454)  
(DUF3454, N=3)

Fisher's OR: 4.24; Bonferroni p-val: 1

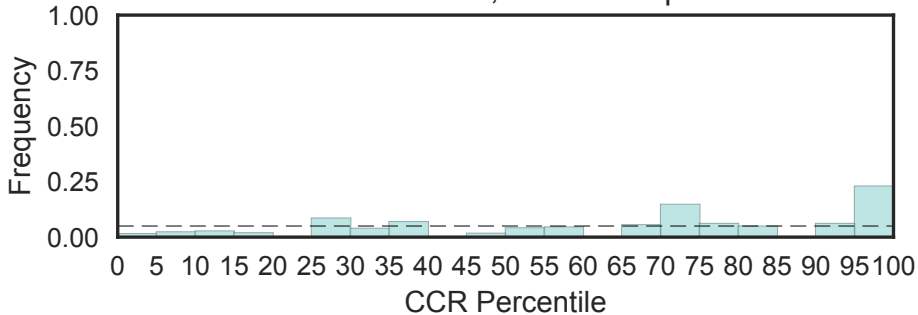

TLR4 regulator and MIR-interacting MSAP  
(DUF3456, N=8)

Fisher's OR: 0.287; Bonferroni p-val: 1

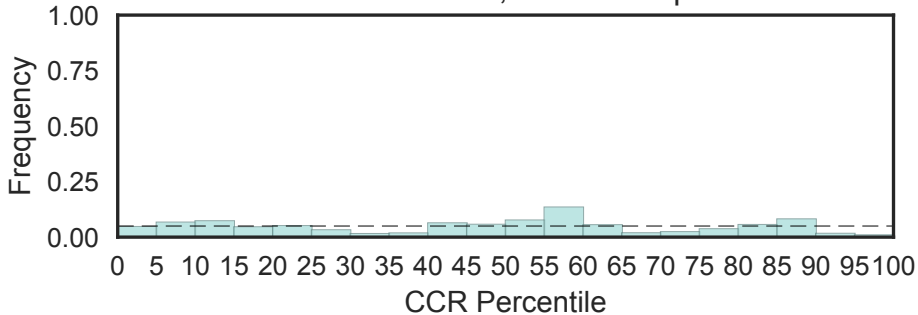



Domain of unknown function (DUF3480)  
(DUF3480, N=3)

Fisher's OR: 0; Bonferroni p-val: 1

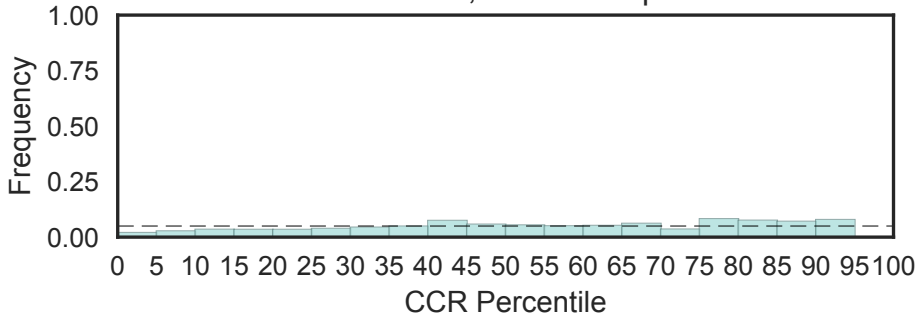

C-terminal domain of neuropilin glycoprotein  
(DUF3481, N=2)

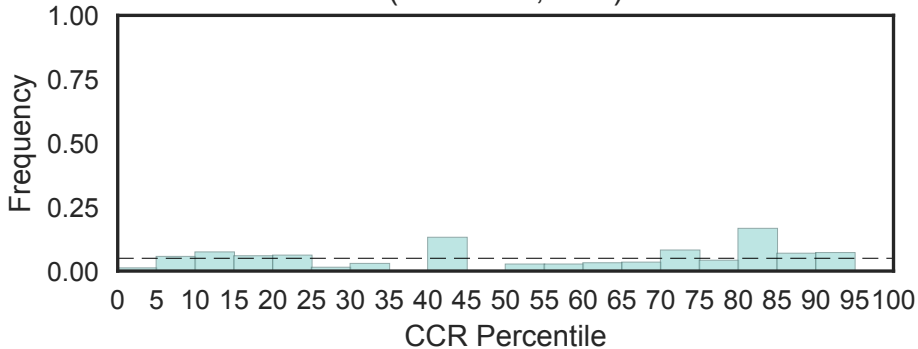

Domain of unknown function (DUF3496)  
(DUF3496, N=4)

Fisher's OR: 0; Bonferroni p-val: 1

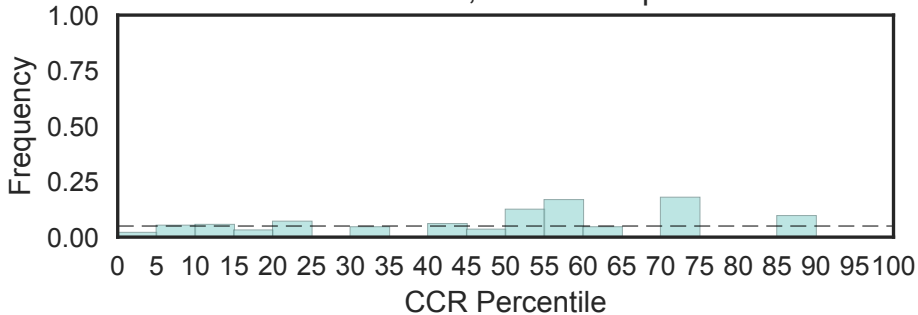

Domain of unknown function (DUF3498)  
(DUF3498, N=3)

Fisher's OR: 0.32; Bonferroni p-val: 1

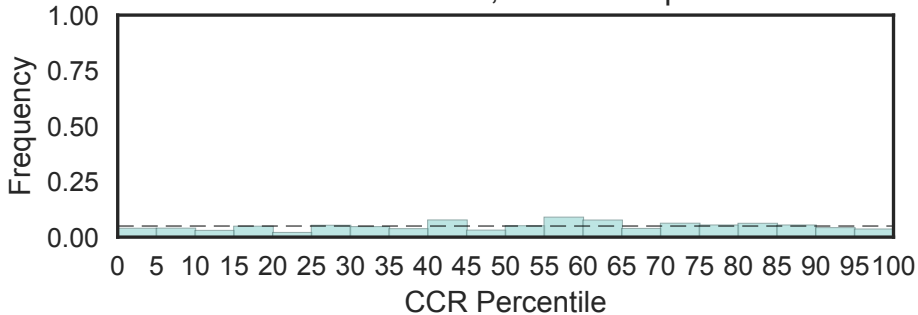

Domain of unknown function (DUF3504)  
(DUF3504, N=5)

Fisher's OR: 3.28; Bonferroni p-val: 1

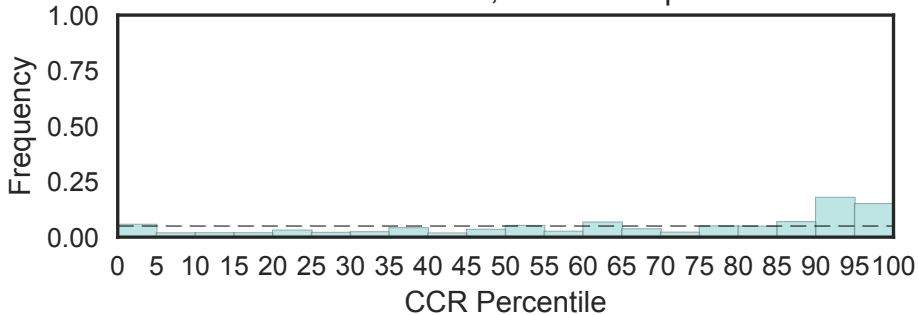

Domain of unknown function (DUF3510)  
(DUF3510, N=1)

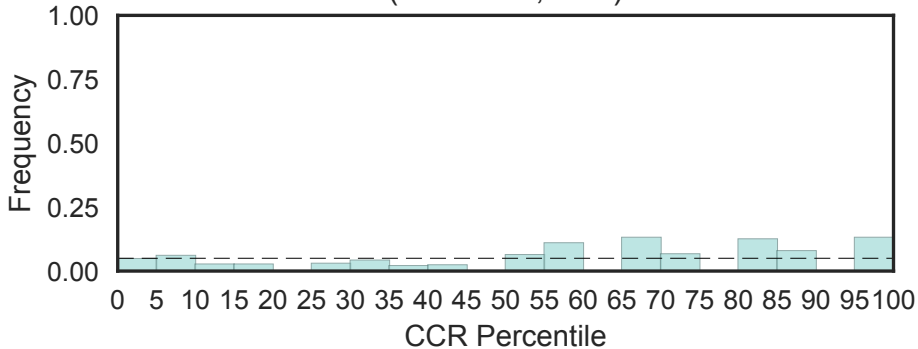

Domain of unknown function (DUF3512)  
(DUF3512, N=2)

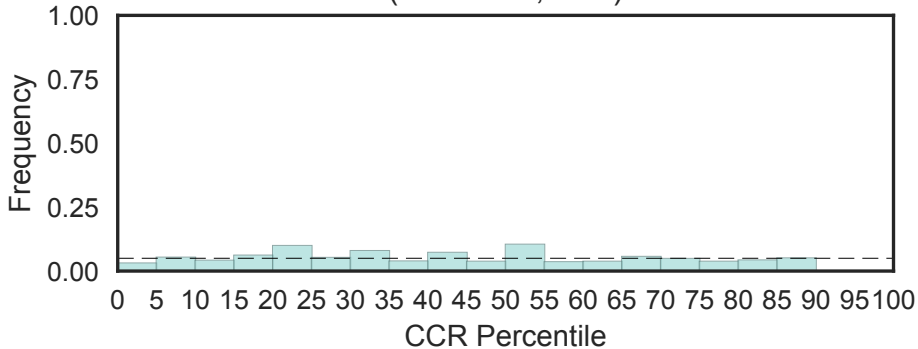

Domain of unknown function (DUF3513)  
(DUF3513, N=4)

Fisher's OR: 0; Bonferroni p-val: 1

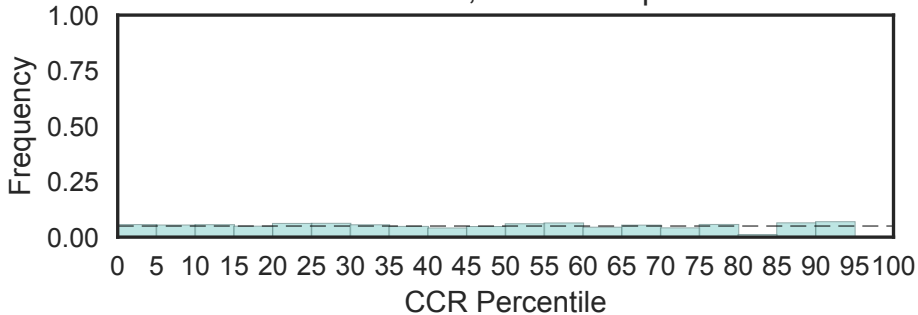



Protein of unknown function (DUF3522)  
(DUF3522, N=3)

Fisher's OR: 0; Bonferroni p-val: 1

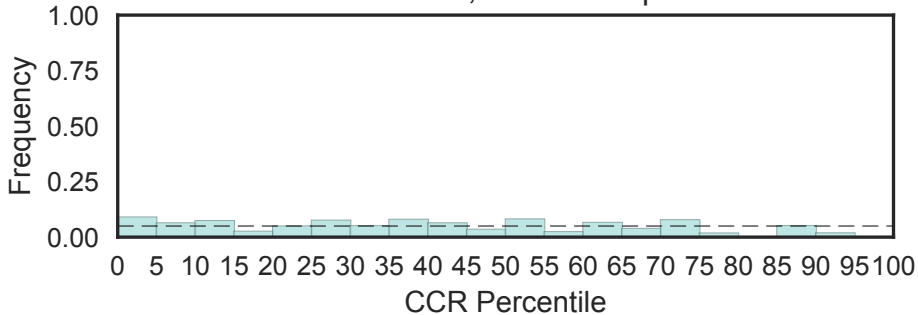

Domain of unknown function (DUF3523)  
(DUF3523, N=4)

Fisher's OR: 0; Bonferroni p-val: 1

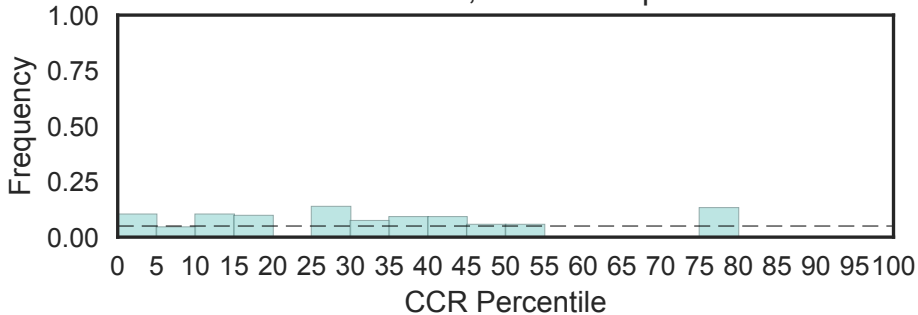

Domain of unknown function (DUF3524)  
(DUF3524, N=1)

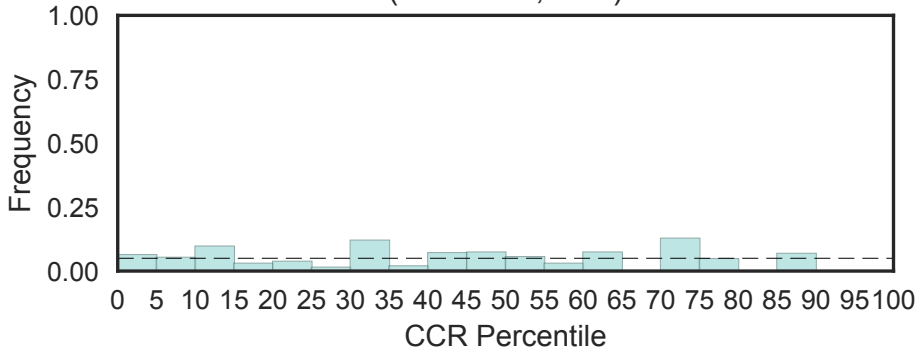

Protein of unknown function (DUF3528)  
(DUF3528, N=4)

Fisher's OR: 0; Bonferroni p-val: 1

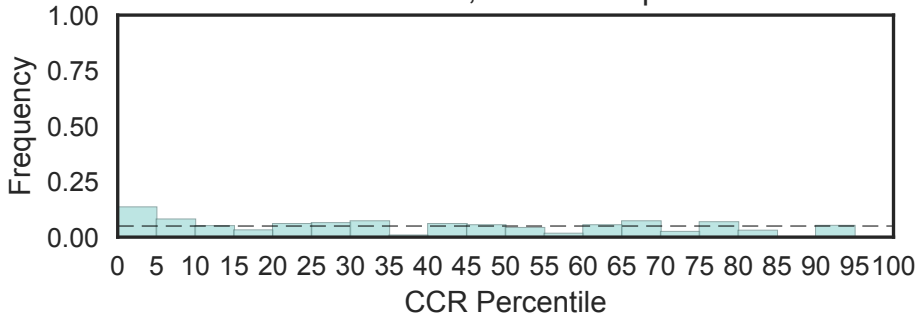

N-terminal of Par3 and HAL proteins  
(DUF3534, N=3)

Fisher's OR: 1.46; Bonferroni p-val: 1

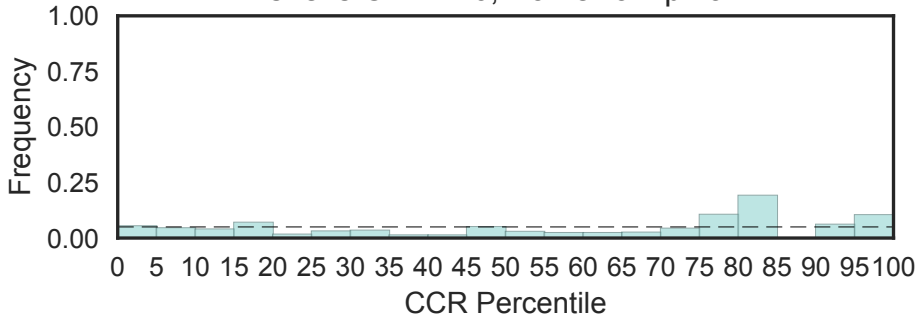

Domain of unknown function (DUF3535)  
(DUF3535, N=1)

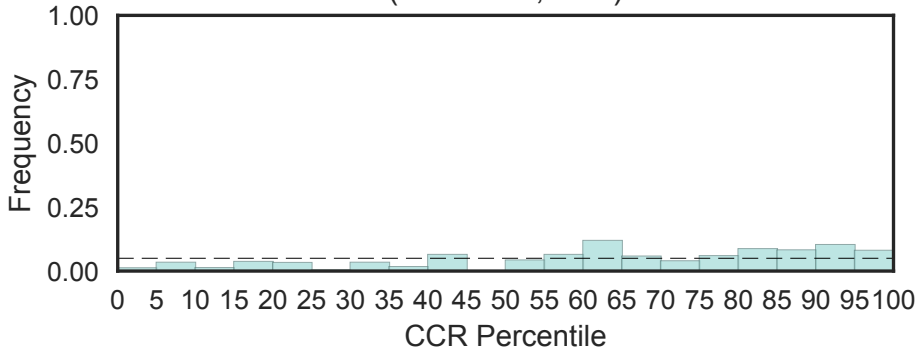

Domain of unknown function (DUF3543)  
(DUF3543, N=2)

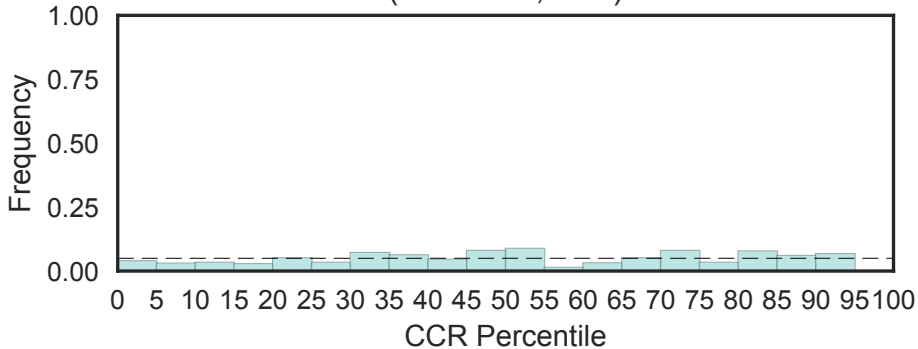

Domain of unknown function (DUF3544)  
(DUF3544, N=1)

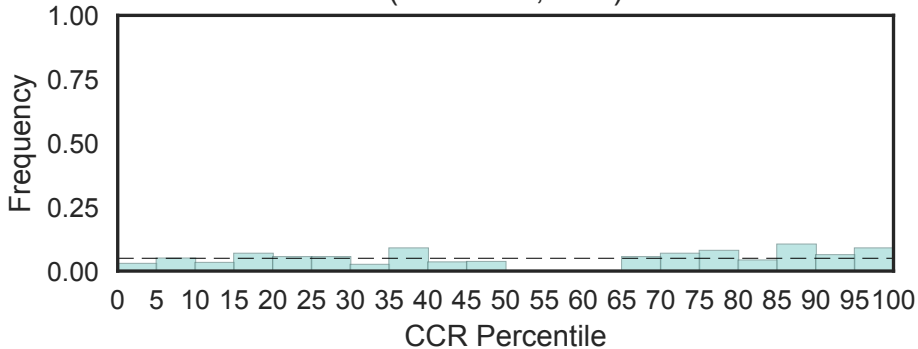



Domain of unknown function (DUF3546)  
(DUF3546, N=1)

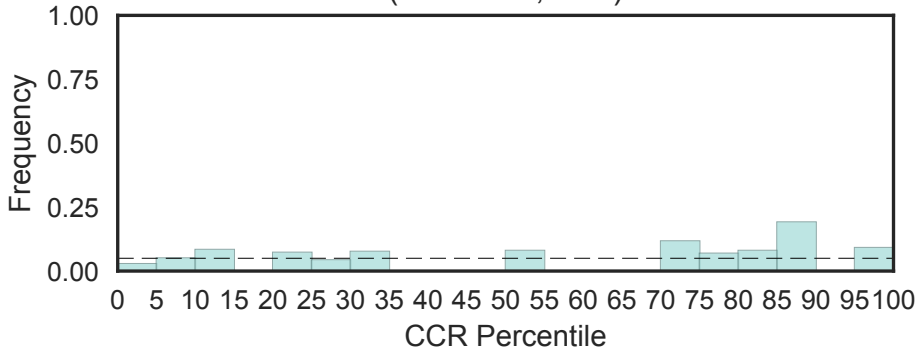

Domain of unknown function (DUF3548)  
(DUF3548, N=2)

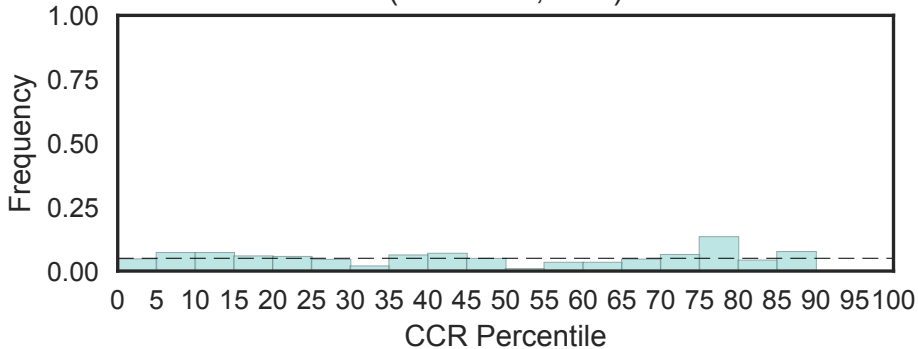

Protein of unknown function (DUF3583)  
(DUF3583, N=2)

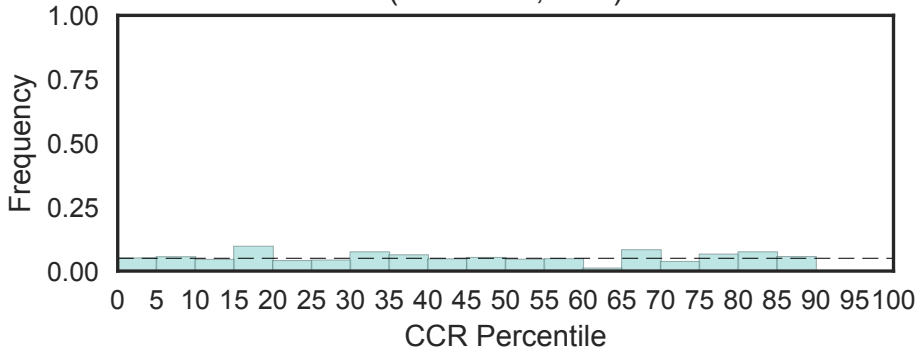

Protein of unknown function (DUF3585)  
(DUF3585, N=9)

Fisher's OR: 0.523; Bonferroni p-val: 1

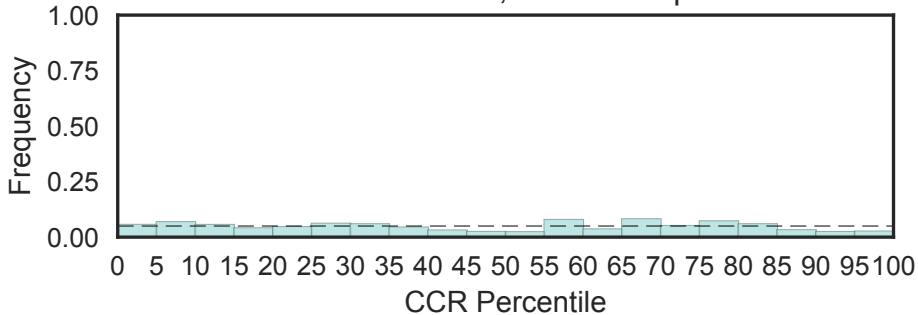

Protein of unknown function (DUF3591)  
(DUF3591, N=1)

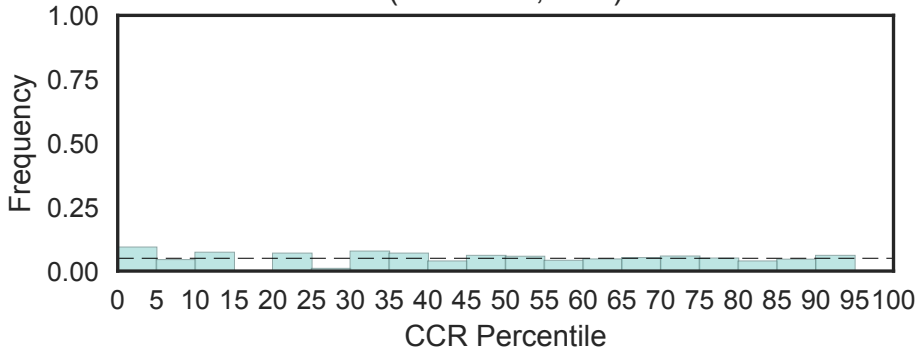

# Huntingtin protein region (DUF3652, N=1)

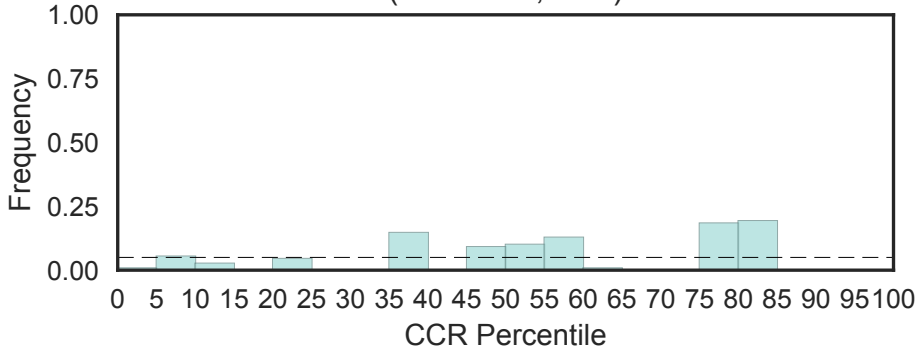

Protein FAM135  
(DUF3657, N=2)

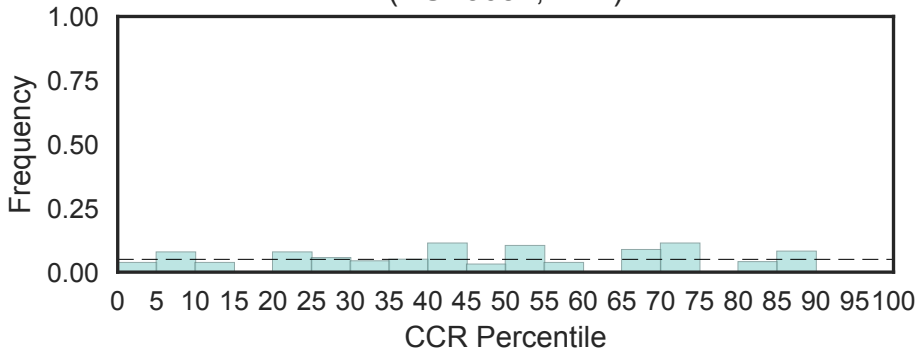

Cep120 protein  
(DUF3668, N=1)

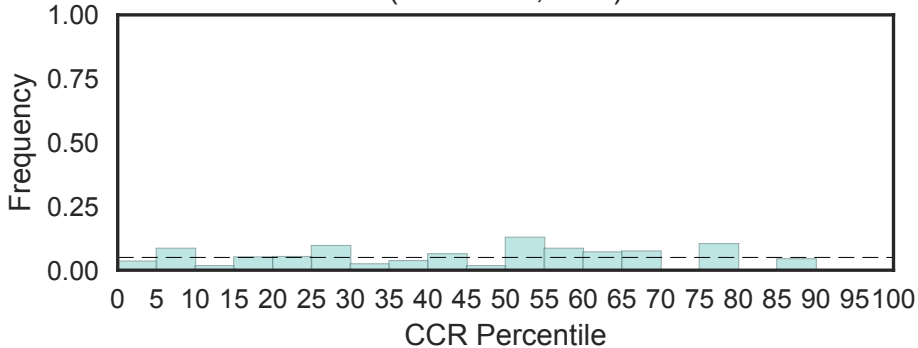



Zinc finger protein  
(DUF3669, N=6)

Fisher's OR: 1.9; Bonferroni p-val: 1

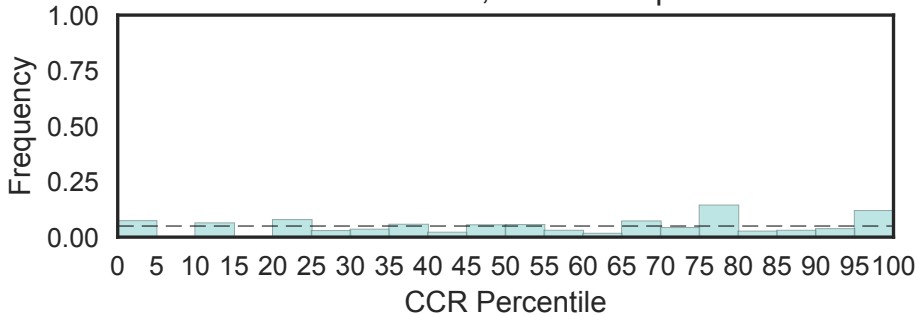

Protein of unknown function (DUF3677)  
(DUF3677, N=1)

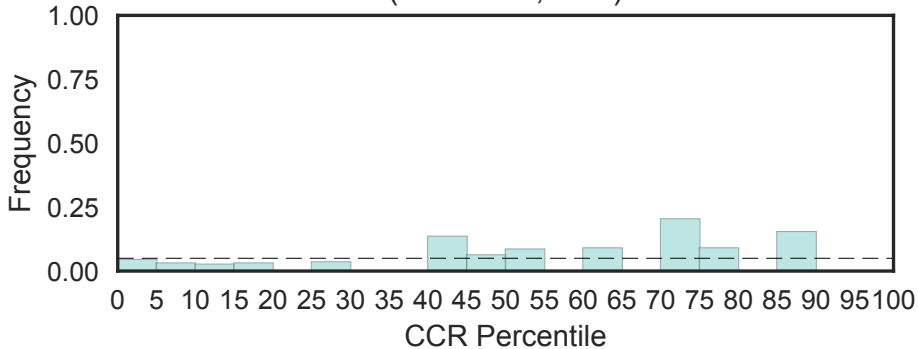

Protein of unknown function (DUF3689)  
(DUF3689, N=1)

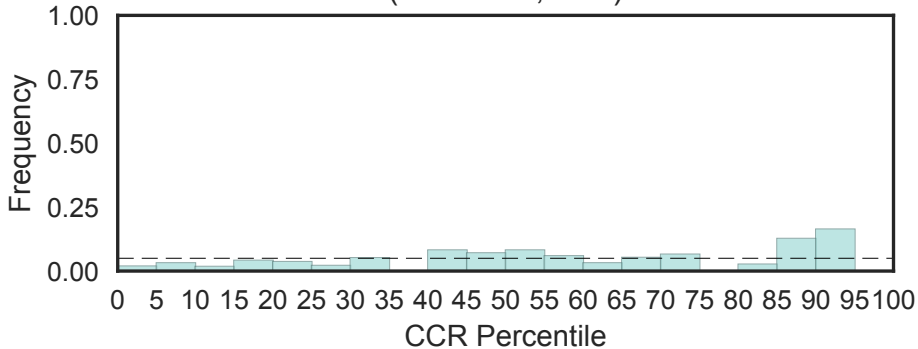

Kinesin protein  
(DUF3694, N=6)

Fisher's OR: 1.83; Bonferroni p-val: 1

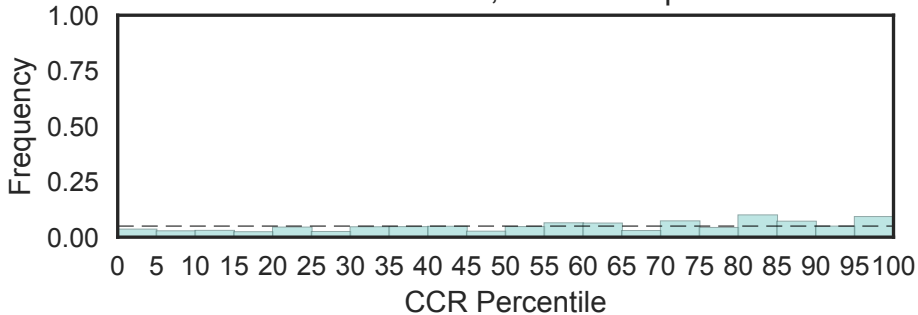

Protein of unknown function (DUF3695)  
(DUF3695, N=1)

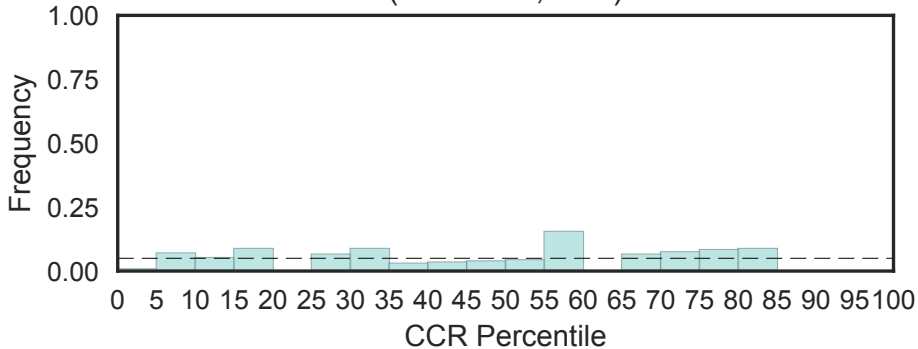

Ubiquitin-associated protein 2  
(DUF3697, N=2)

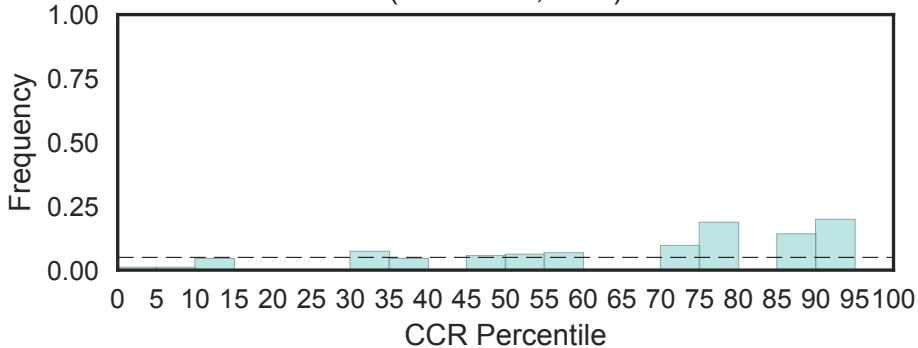

Protein of unknown function (DUF3699)  
(DUF3699, N=8)

Fisher's OR: 0.491; Bonferroni p-val: 1

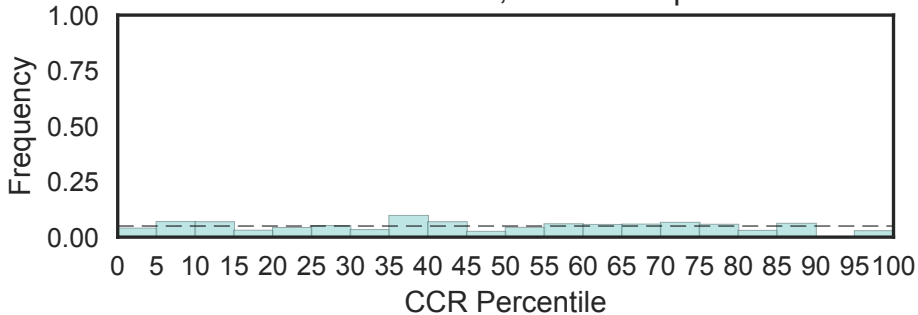

Protein of unknown function (DUF3715)  
(DUF3715, N=3)

Fisher's OR: 0; Bonferroni p-val: 1

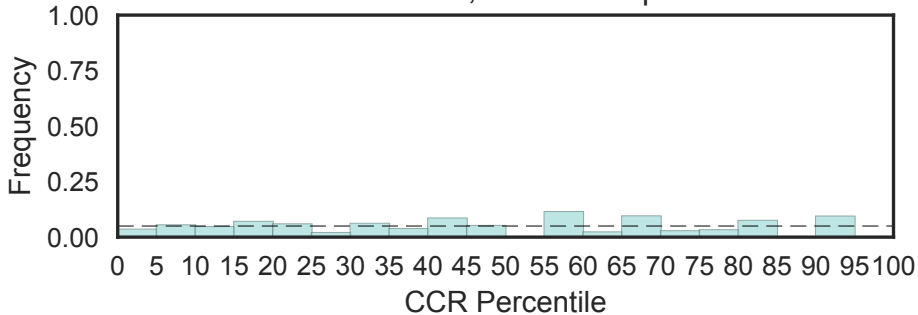



Protein of unknown function (DUF3719)  
(DUF3719, N=2)

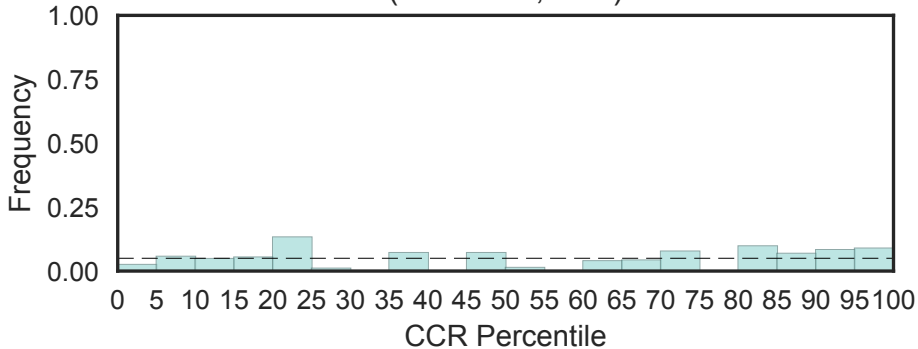

Protein of unknown function (DUF3730)  
(DUF3730, N=1)

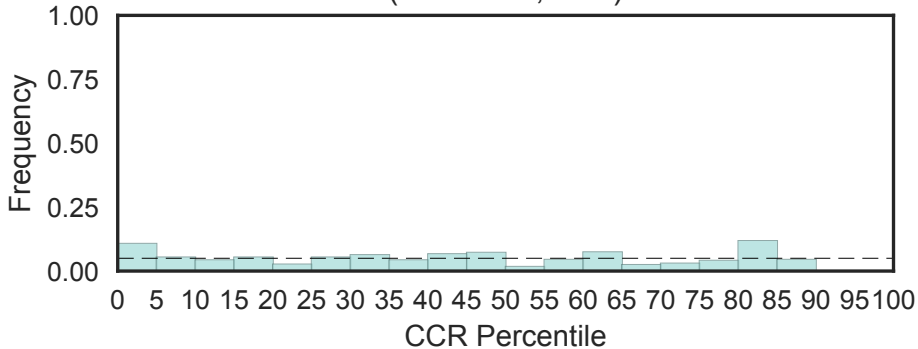

Protein of unknown function (DUF3736)  
(DUF3736, N=2)

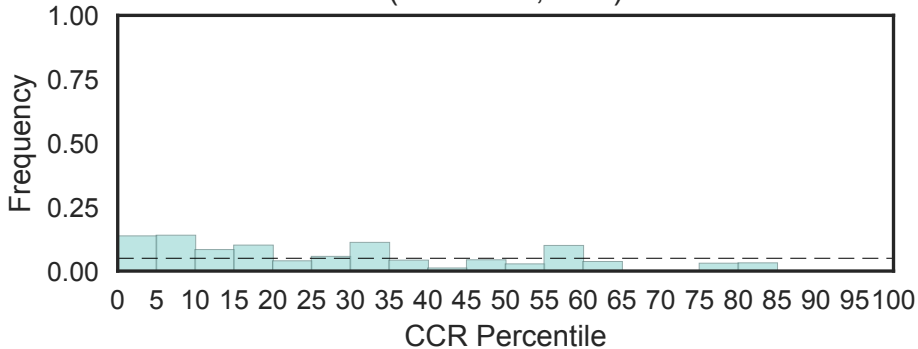

Sulfatase protein  
(DUF3740, N=2)

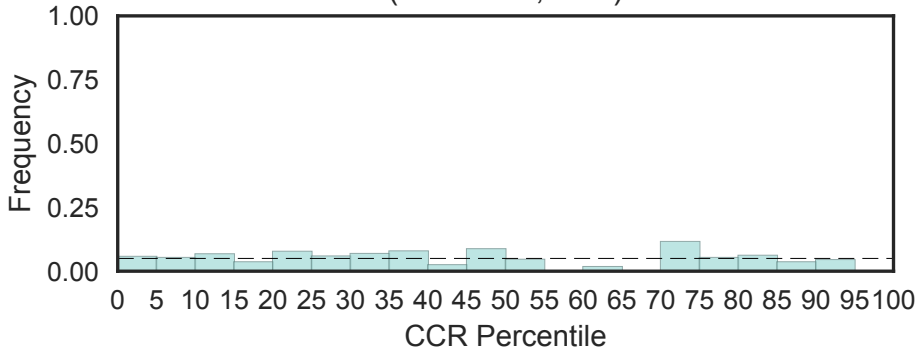

Protein of unknown function (DUF3752)  
(DUF3752, N=1)

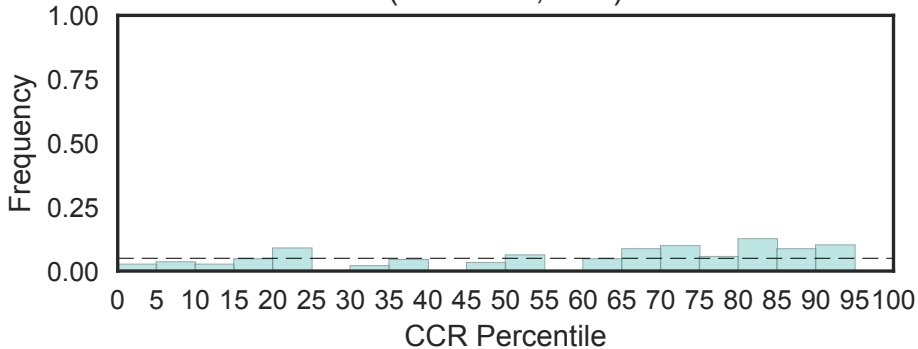

Protein of unknown function (DUF3754)  
(DUF3754, N=1)

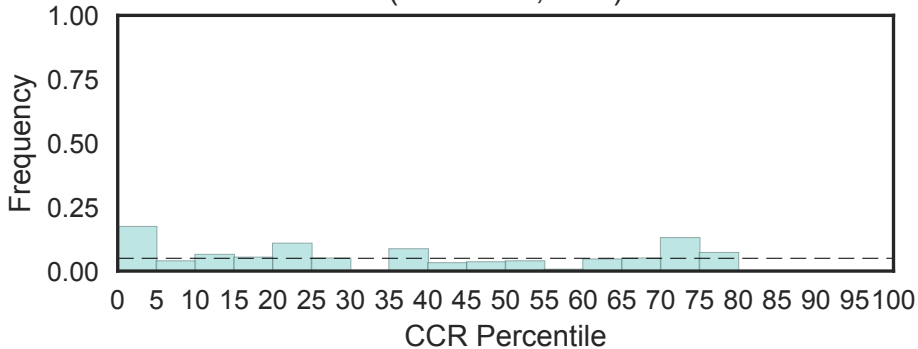

Protein of unknown function (DUF3767)  
(DUF3767, N=1)

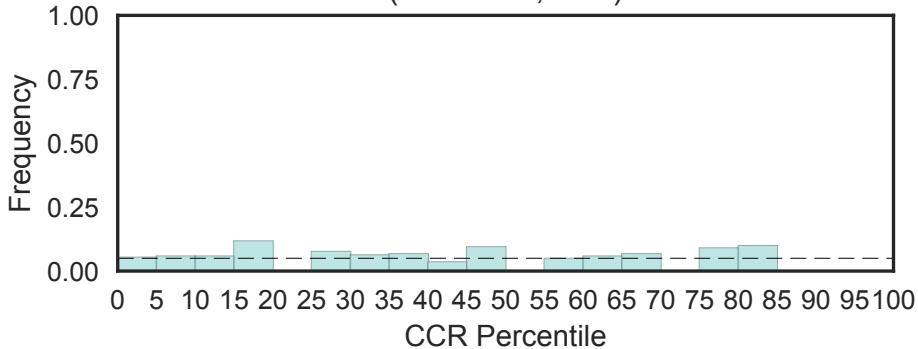

Protein of unknown function (DUF3776)  
(DUF3776, N=2)

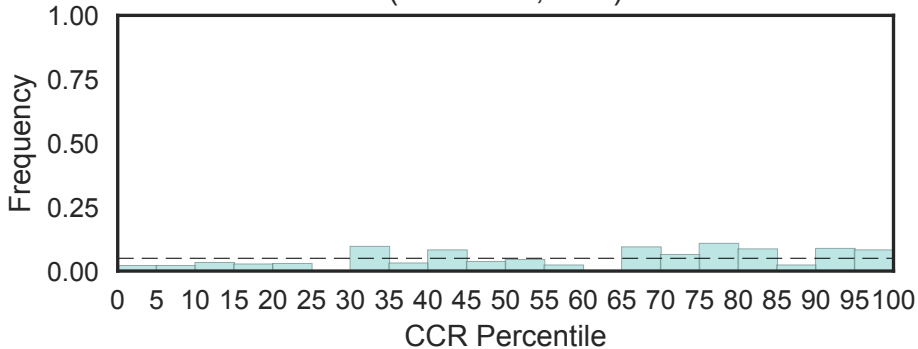



Protein of unknown function (DUF3808)  
(DUF3808, N=6)

Fisher's OR: 0.709; Bonferroni p-val: 1

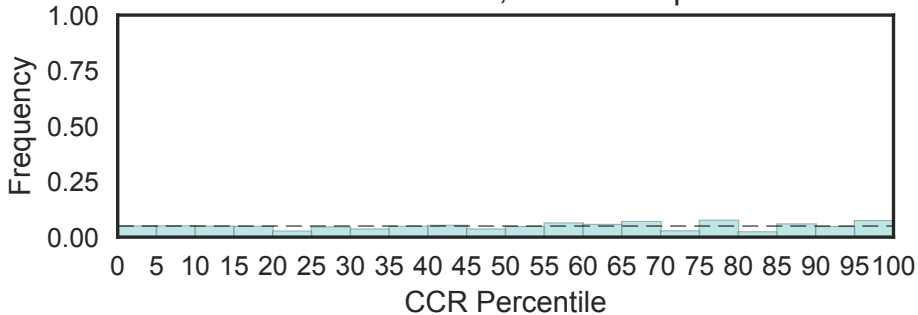

Domain of unknown function (DUF3819)  
(DUF3819, N=1)

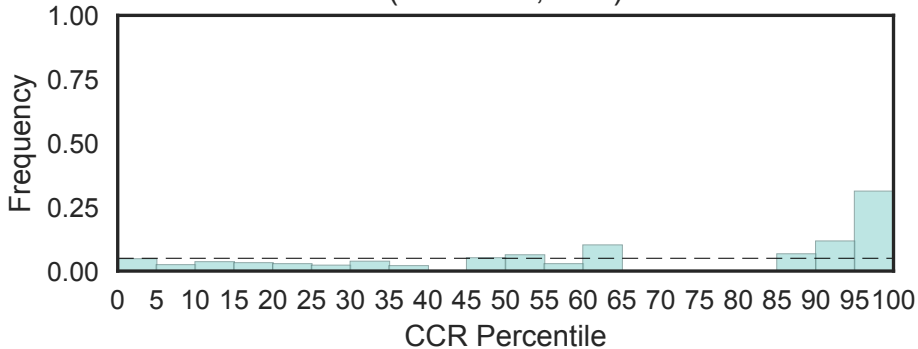

Domain of unknown function (DUF382)  
(DUF382, N=1)

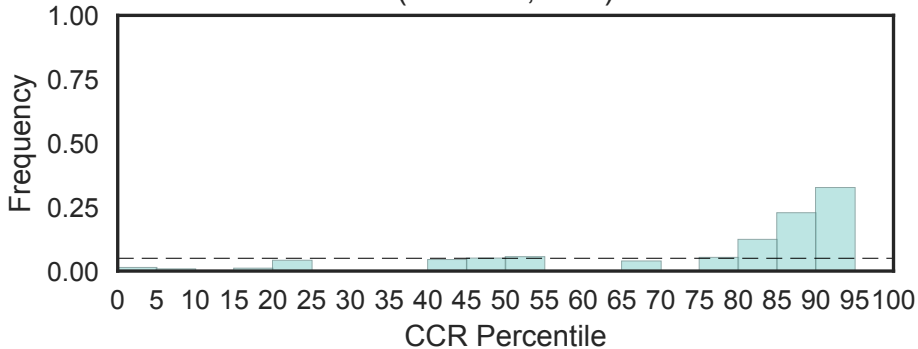

Domain of unknown function (DUF3824)  
(DUF3824, N=4)

Fisher's OR: 0; Bonferroni p-val: 1

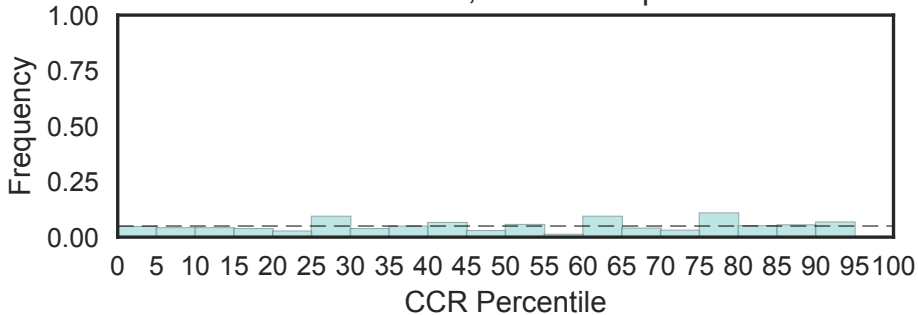

Domain of unknown function (DUF3827)  
(DUF3827, N=2)

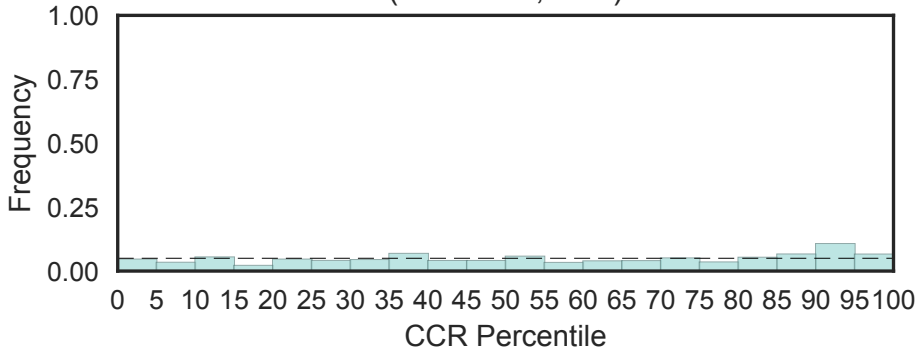

Domain of unknown function (DUF3835)  
(DUF3835, N=2)

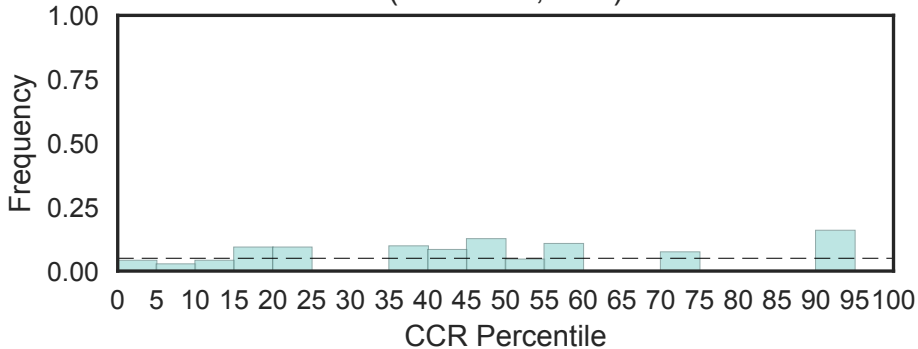

Domain of unknown function (DUF4042)  
(DUF4042, N=1)

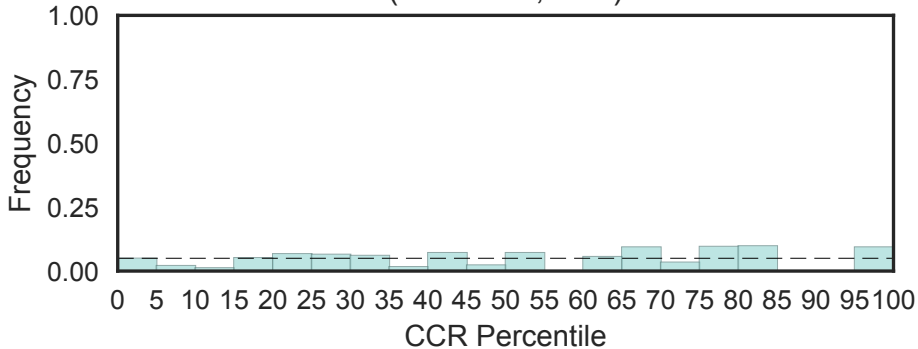

Domain of unknown function (DUF4061)  
(DUF4061, N=2)

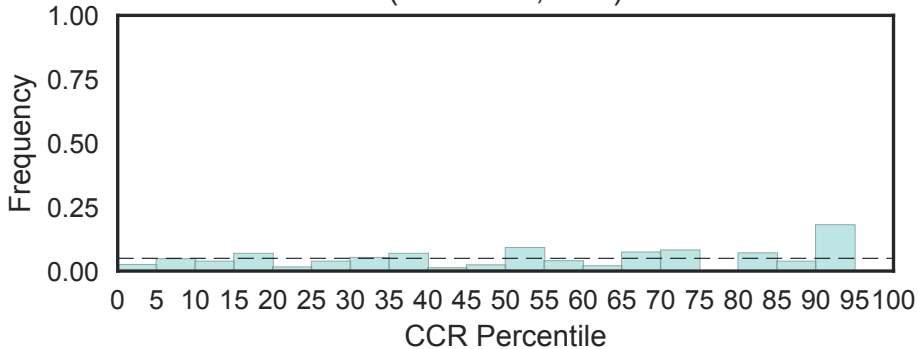



Domain of unknown function (DUF4062)  
(DUF4062, N=2)

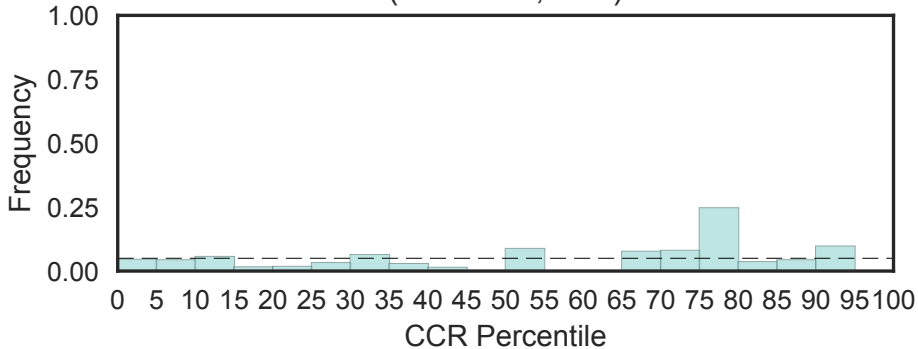

Domain of unknown function (DUF4071)  
(DUF4071, N=2)

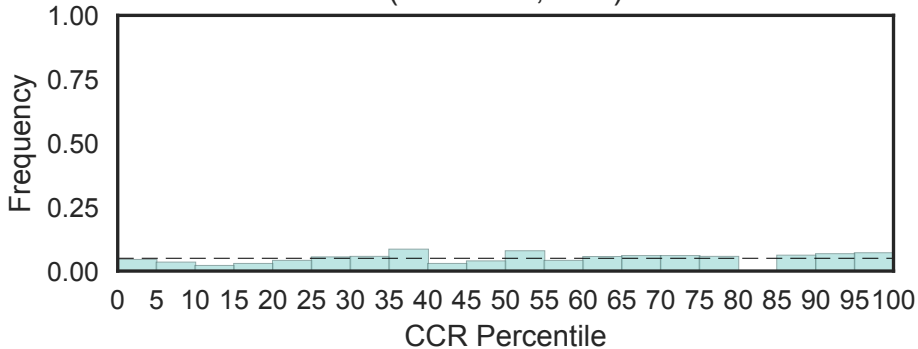

Domain of unknown function (DUF4074)  
(DUF4074, N=3)

Fisher's OR: 0; Bonferroni p-val: 1

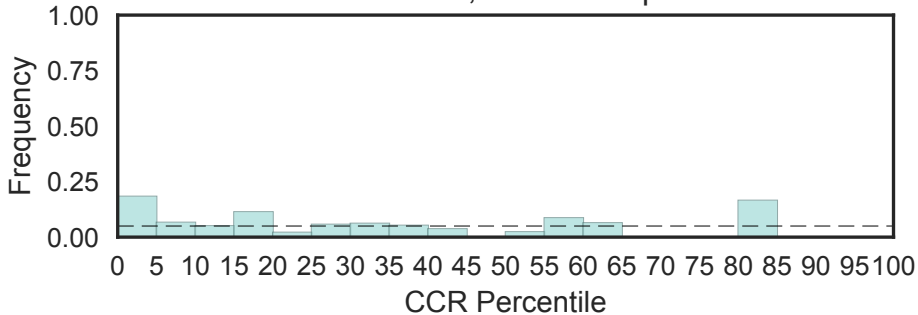

Domain of unknown function (DUF4078)  
(DUF4078, N=1)

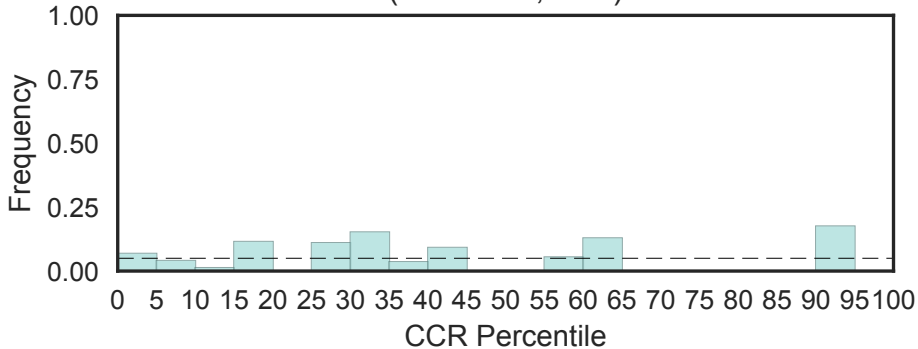

Protein of unknown function (DUF410)  
(DUF410, N=1)

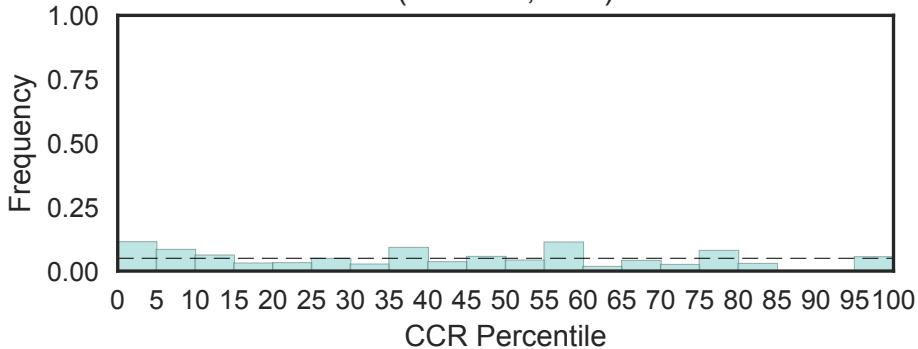

Domain of unknown function (DUF4147)  
(DUF4147, N=1)

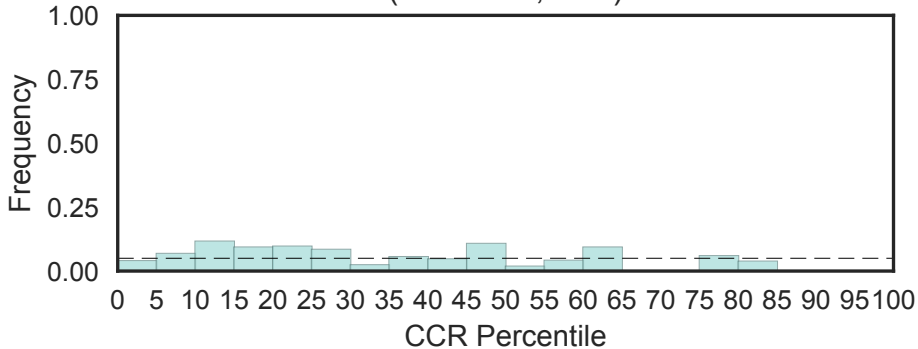

Domain of unknown function (DUF4149)  
(DUF4149, N=1)

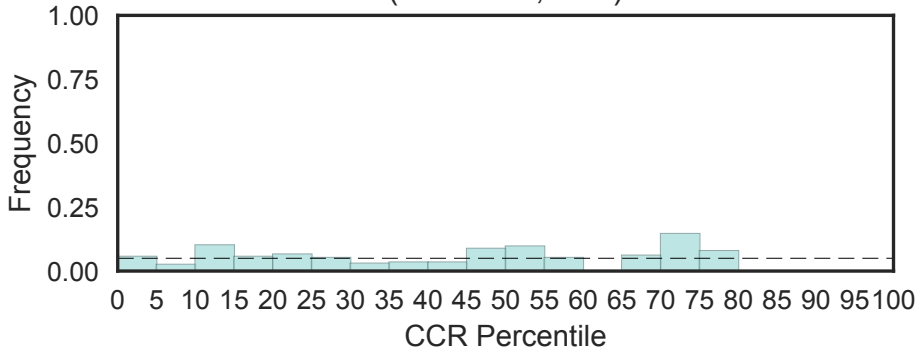

Domain of unknown function (DUF4171)  
(DUF4171, N=1)

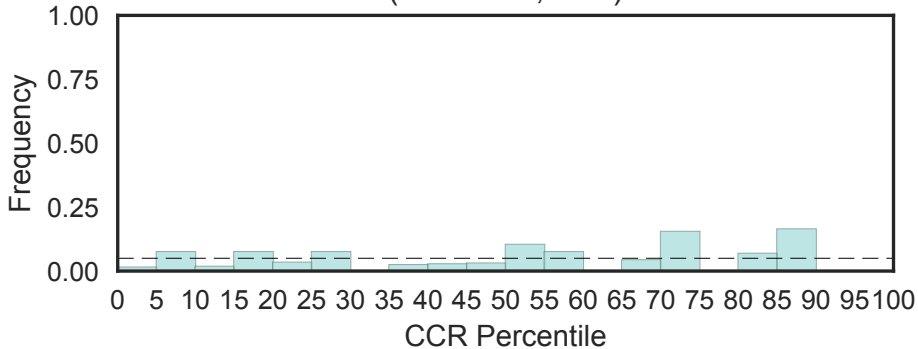



Domain of unknown function (DUF4174)  
(DUF4174, N=3)

Fisher's OR: 0; Bonferroni p-val: 1

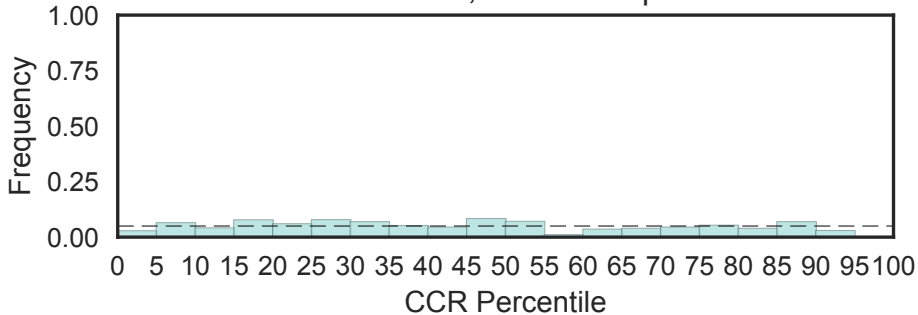

Domain of unknown function (DUF4187)  
(DUF4187, N=1)

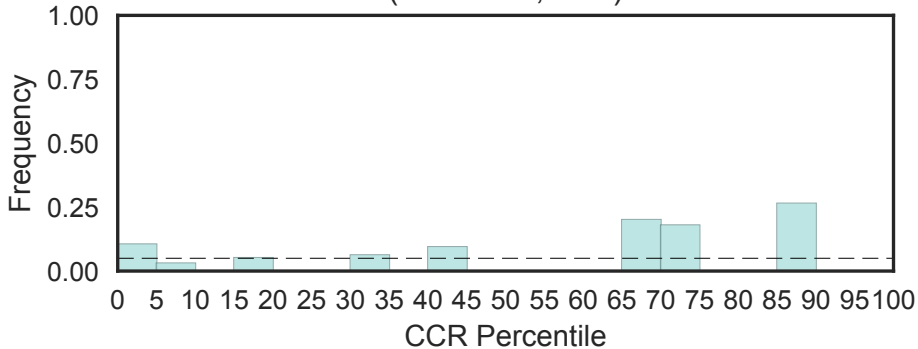

Domain of unknown function (DUF4195)  
(DUF4195, N=3)

Fisher's OR: 0; Bonferroni p-val: 1

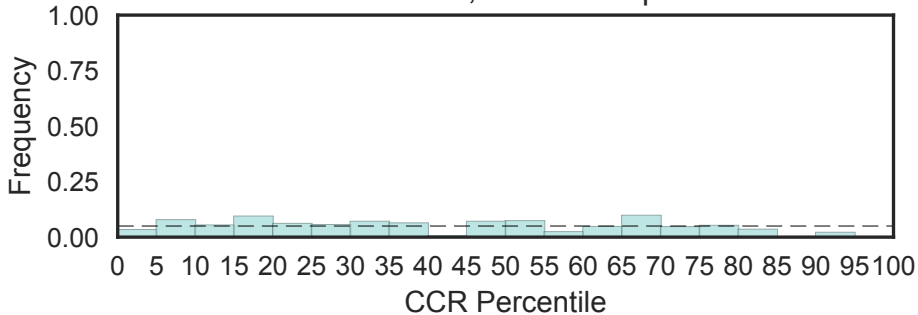

Domain of unknown function (DUF4196)  
(DUF4196, N=1)

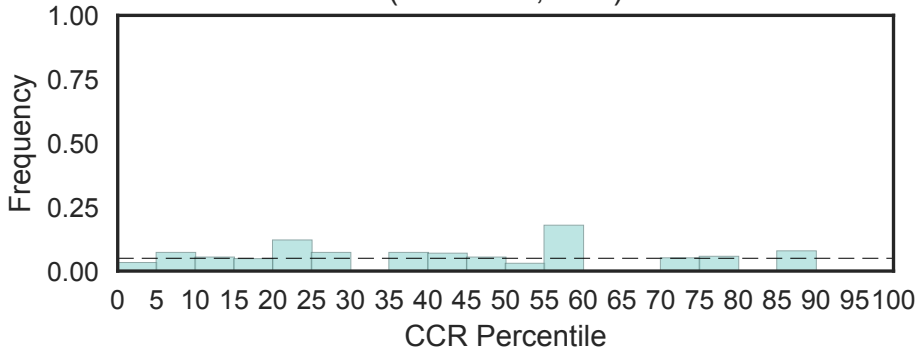

Domain of unknown function (DUF4200)  
(DUF4200, N=5)

Fisher's OR: 0; Bonferroni p-val: 1

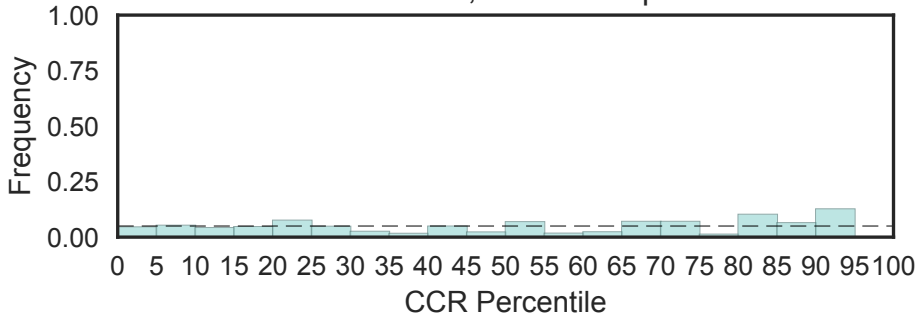

Domain of unknown function (DUF4201)  
(DUF4201, N=2)

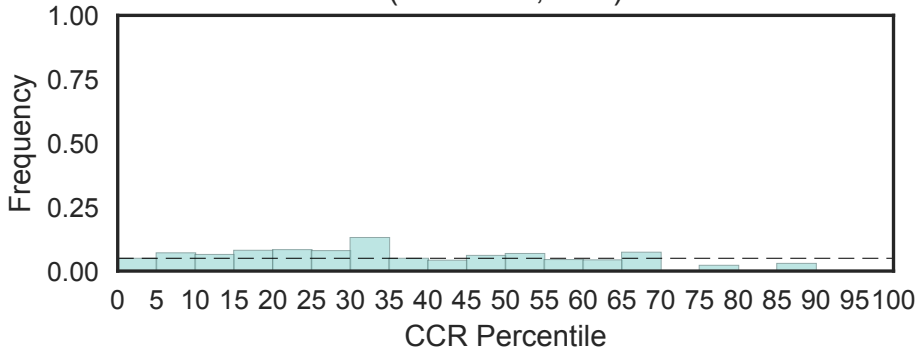

Domain of unknown function (DUF4203)  
(DUF4203, N=2)

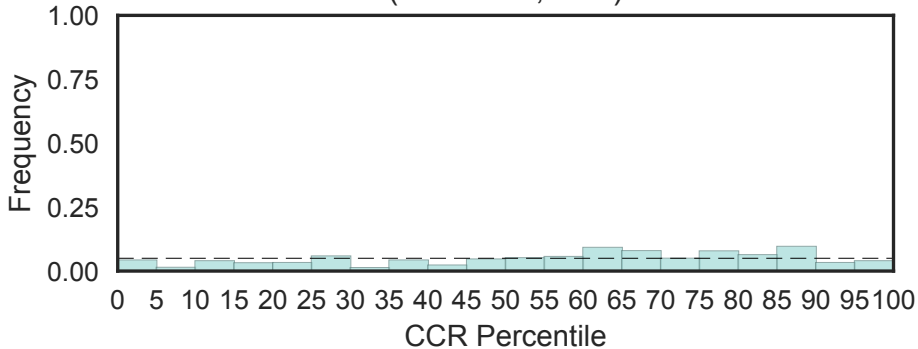

Domain of unknown function (DUF4205)  
(DUF4205, N=4)

Fisher's OR: 0.266; Bonferroni p-val: 1

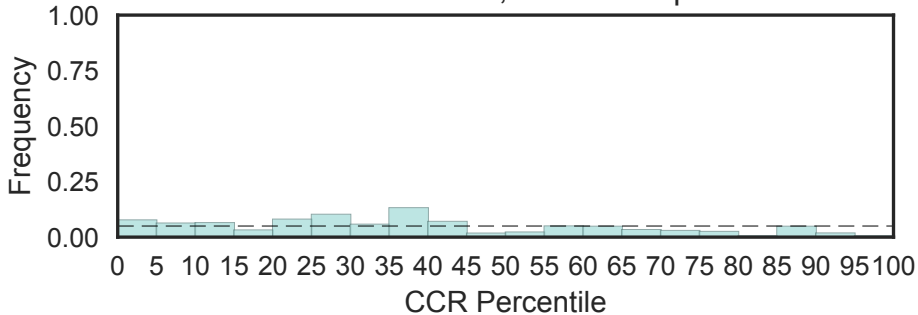



Domain of unknown function (DUF4207)  
(DUF4207, N=1)

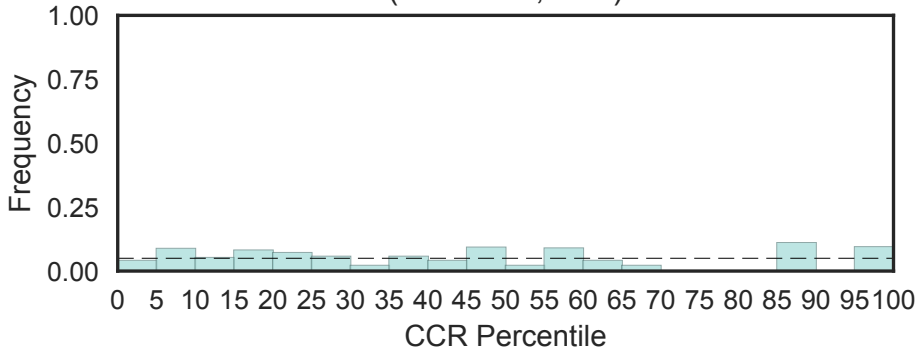

Domain of unknown function (DUF4208)  
(DUF4208, N=3)

Fisher's OR: 7.33; Bonferroni p-val: 1

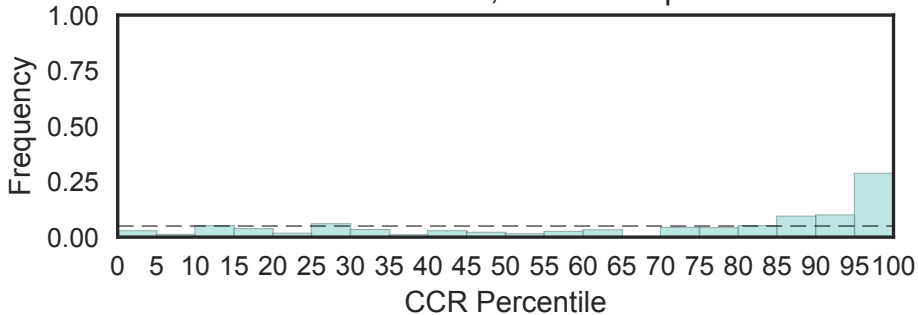

Domain of unknown function (DUF4209)  
(DUF4209, N=1)

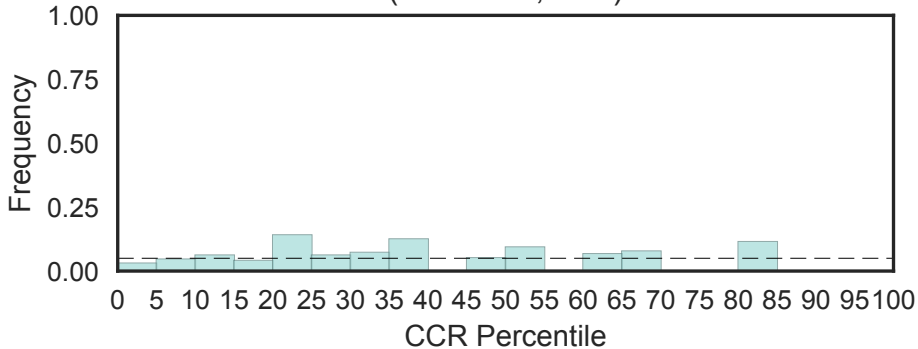

Domain of unknown function (DUF4210)  
(DUF4210, N=2)

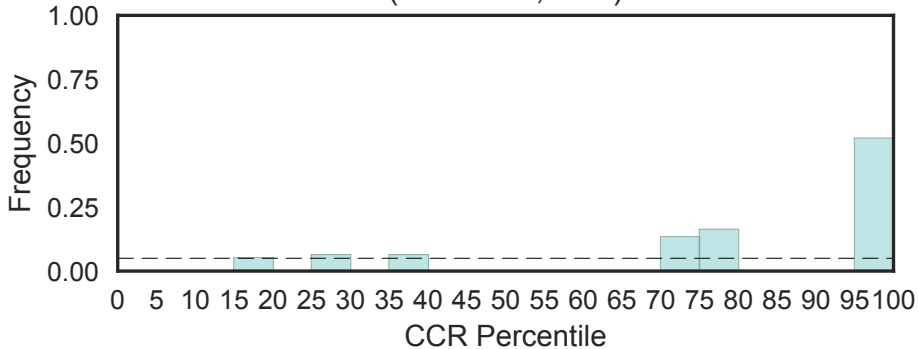

Domain of unknown function (DUF4211)  
(DUF4211, N=3)

Fisher's OR: 2.1; Bonferroni p-val: 1

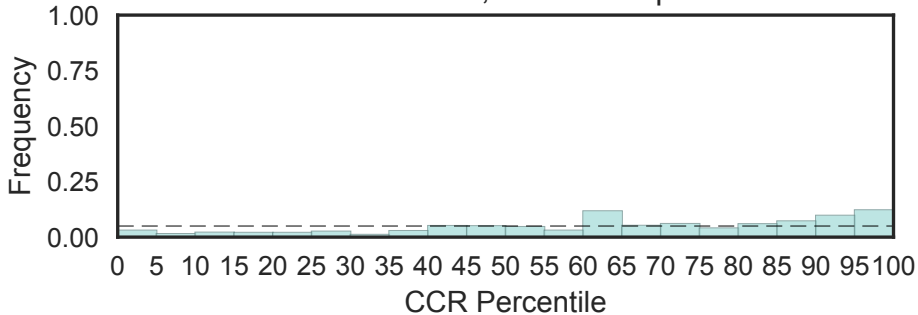

Domain of unknown function (DUF4215)  
(DUF4215, N=3)

Fisher's OR: 0; Bonferroni p-val: 1

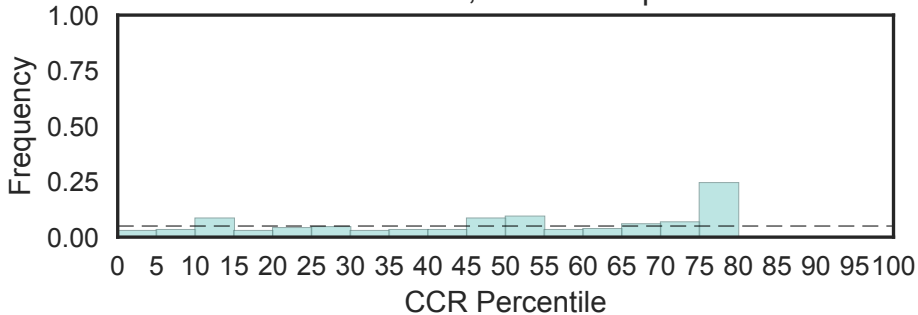

Domain of unknown function (DUF4217)  
(DUF4217, N=4)

Fisher's OR: 0; Bonferroni p-val: 1

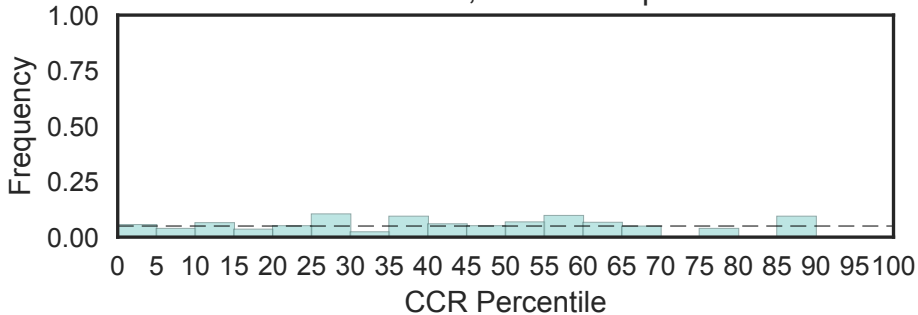

Protein of unknown function (DUF423)  
(DUF423, N=1)

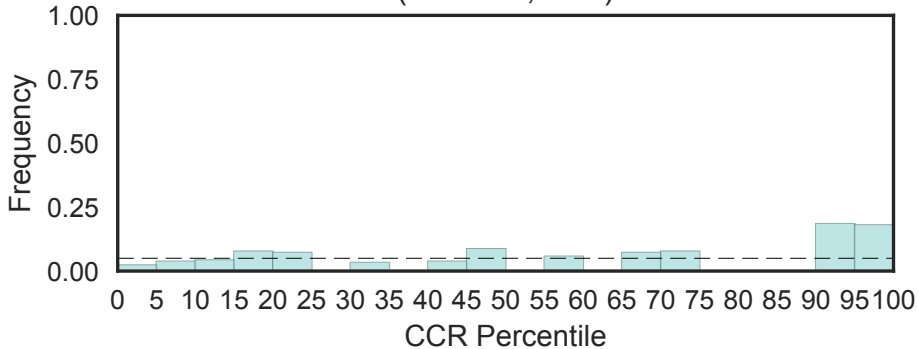



Domain of unknown function (DUF4339)  
(DUF4339, N=1)

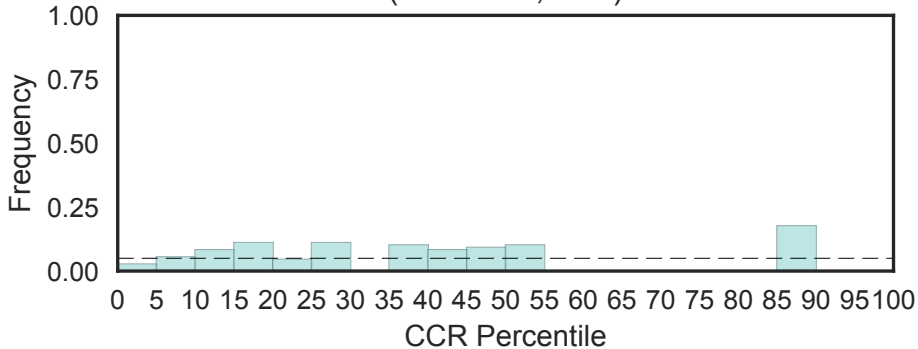

Domain of unknown function (DUF4347)  
(DUF4347, N=1)

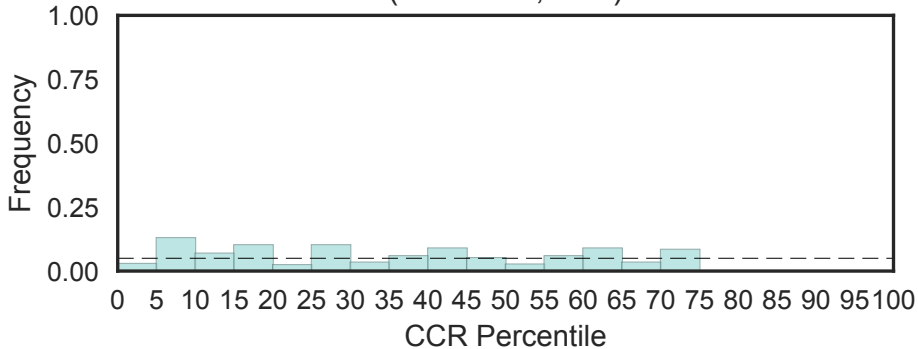

Domain of unknown function (DUF4371)  
(DUF4371, N=2)

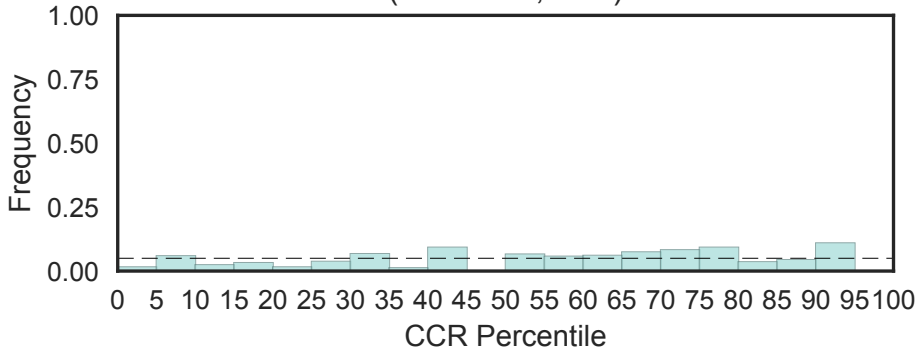

Domain of unknown function (DUF4378)  
(DUF4378, N=1)

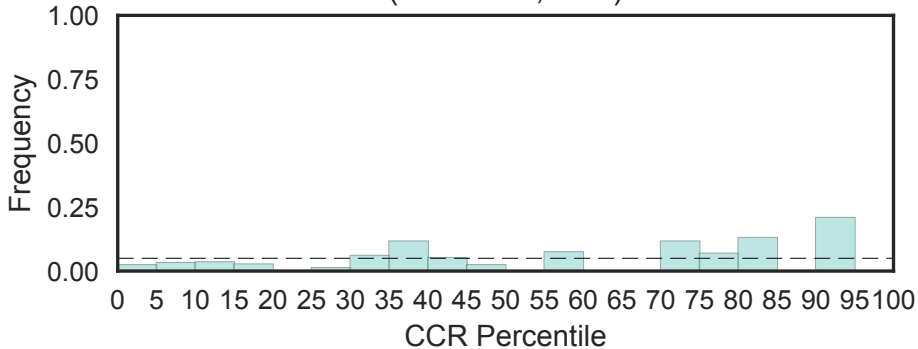

Domain of unknown function (DUF4392)  
(DUF4392, N=1)

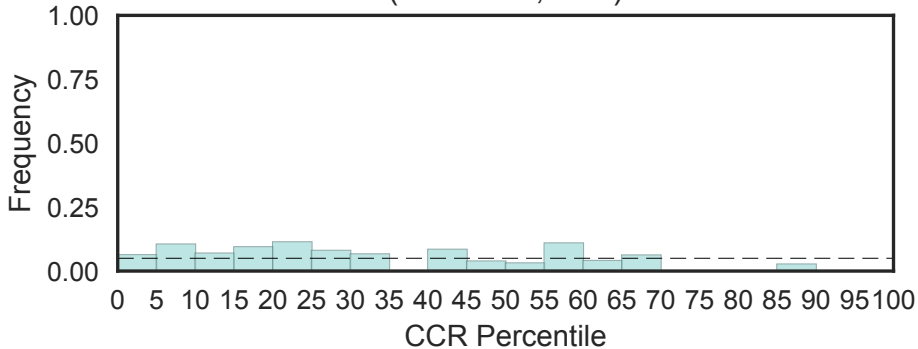

Domain of unknown function (DUF4414)  
(DUF4414, N=1)

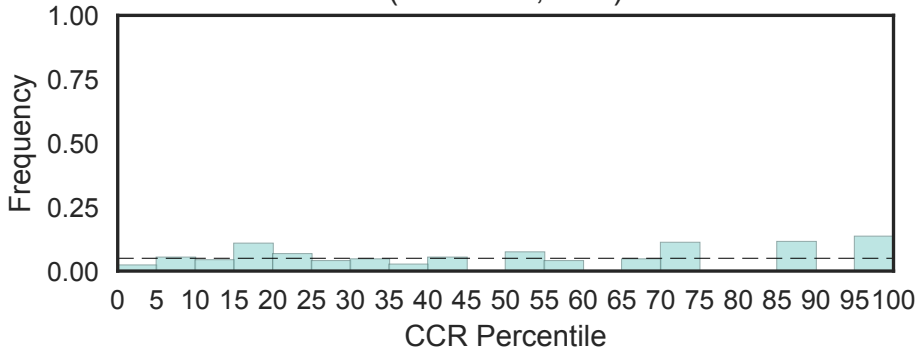

Domain of unknown function (DUF4430)  
(DUF4430, N=3)

Fisher's OR: 0; Bonferroni p-val: 1

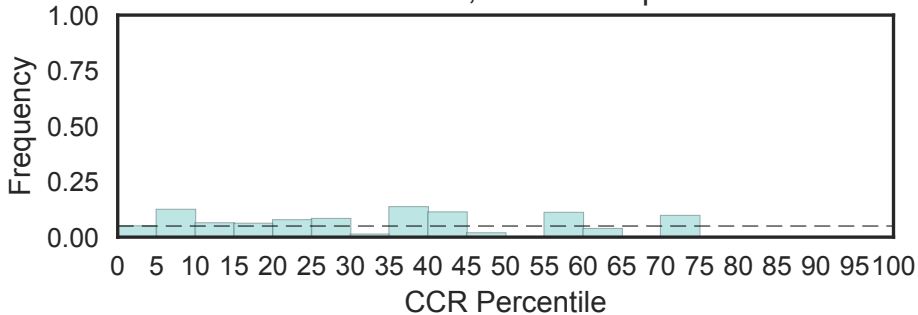

Domain of unknown function (DUF4440)  
(DUF4440, N=4)

Fisher's OR: 3.73; Bonferroni p-val: 1

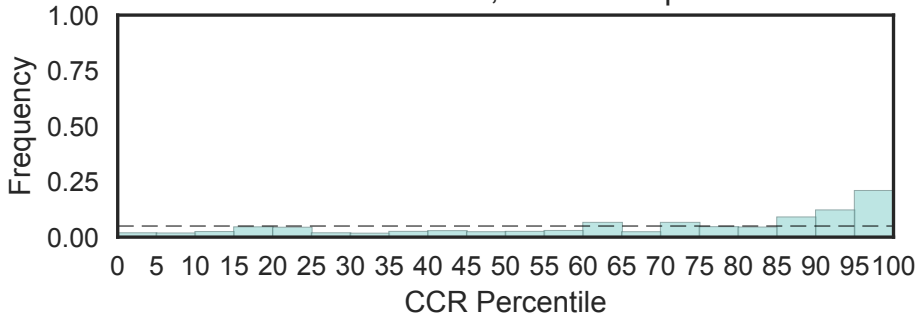



Domain of unknown function (DUF4455)  
(DUF4455, N=1)

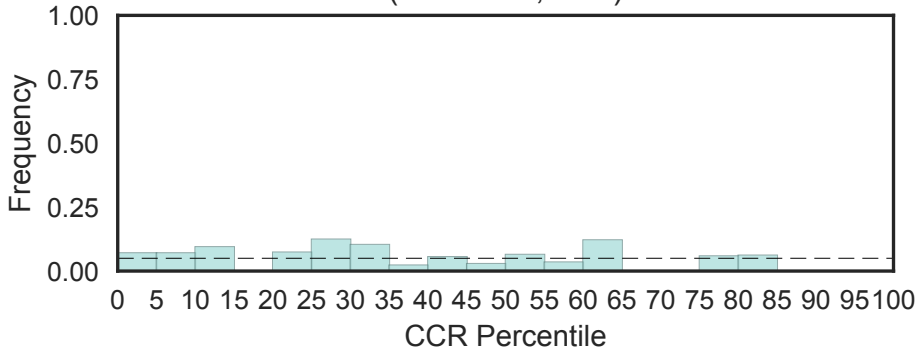

Domain of unknown function (DUF4456)  
(DUF4456, N=1)

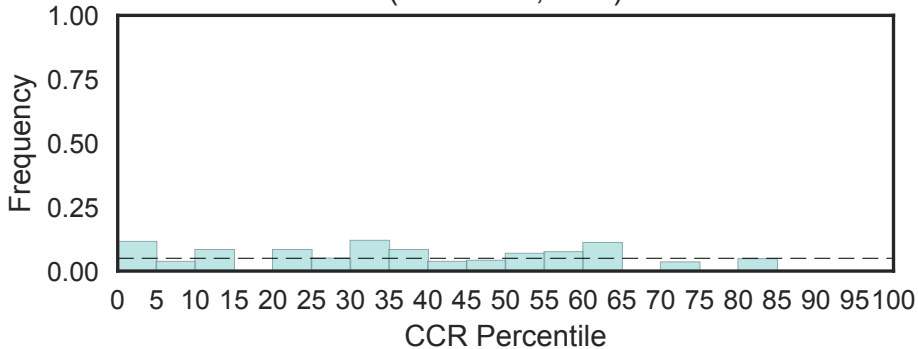

Domain of unknown function (DUF4457)  
(DUF4457, N=3)

Fisher's OR: 0; Bonferroni p-val: 1

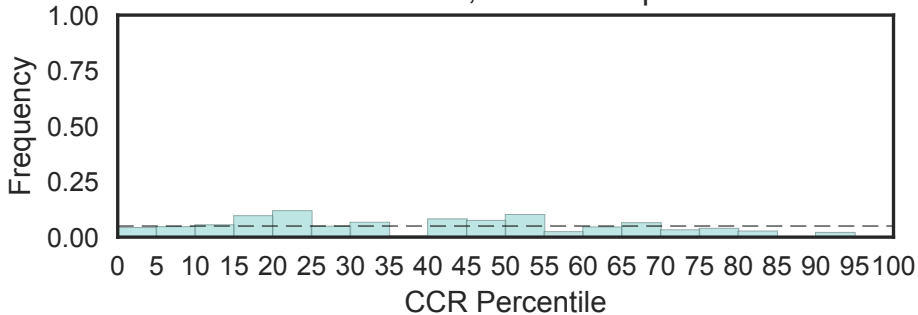

Domain of unknown function (DUF4460)  
(DUF4460, N=1)

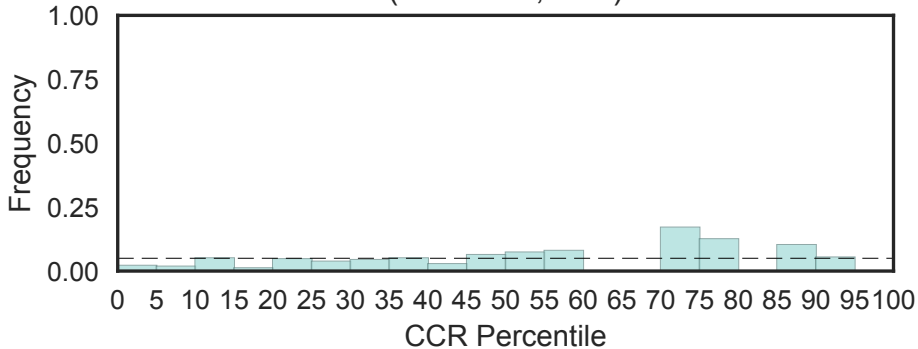

Domain of unknown function (DUF4461)  
(DUF4461, N=1)

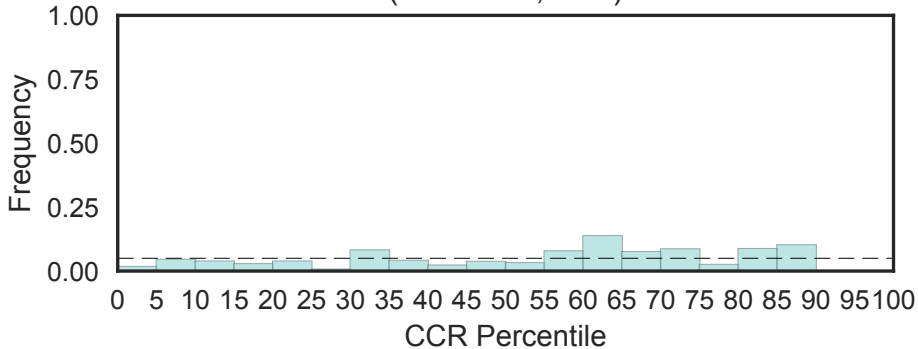

Domain of unknown function (DUF4464)  
(DUF4464, N=1)

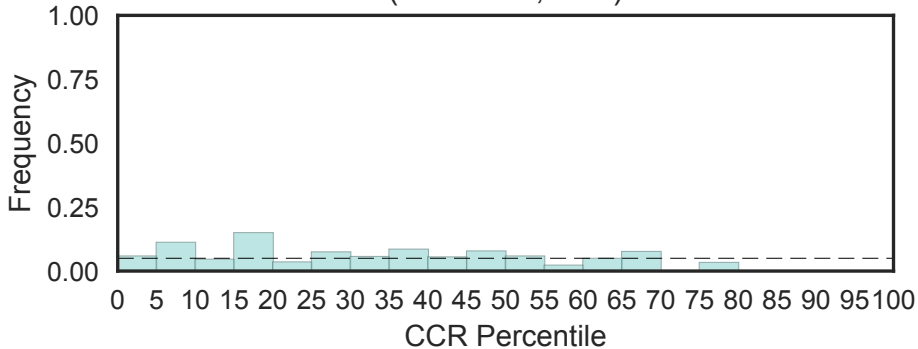

Domain of unknown function (DUF4470)  
(DUF4470, N=1)

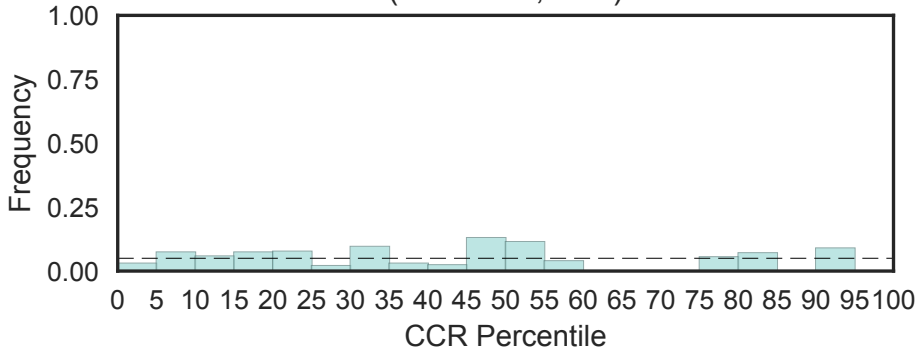

Domain of unknown function (DUF4471)  
(DUF4471, N=1)

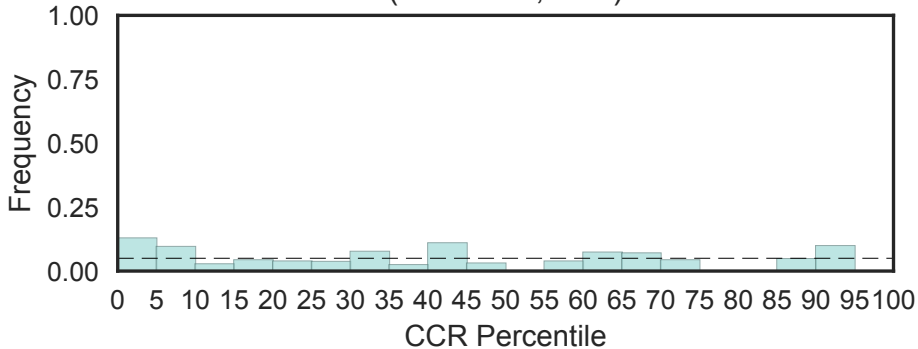



Domain of unknown function (DUF4472)  
(DUF4472, N=1)

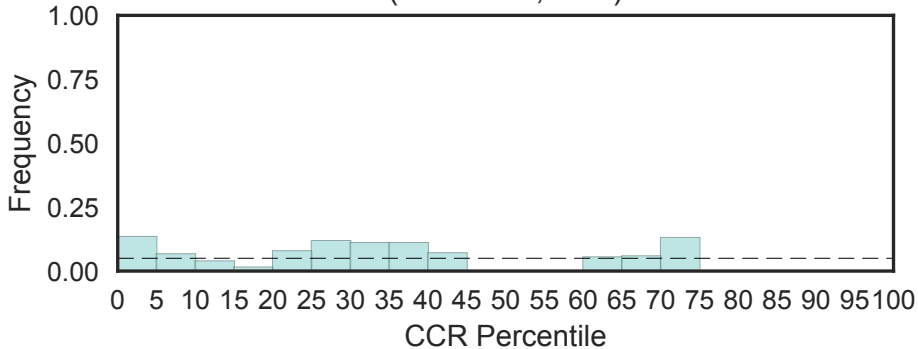

Domain of unknown function (DUF4476)  
(DUF4476, N=1)

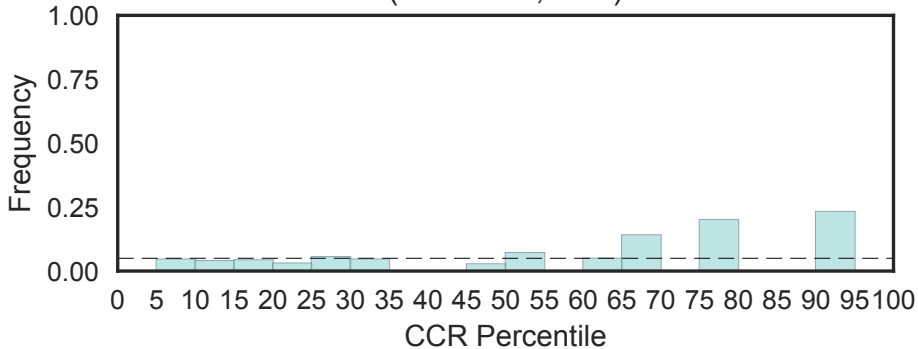

Domain of unknown function (DUF4477)  
(DUF4477, N=1)

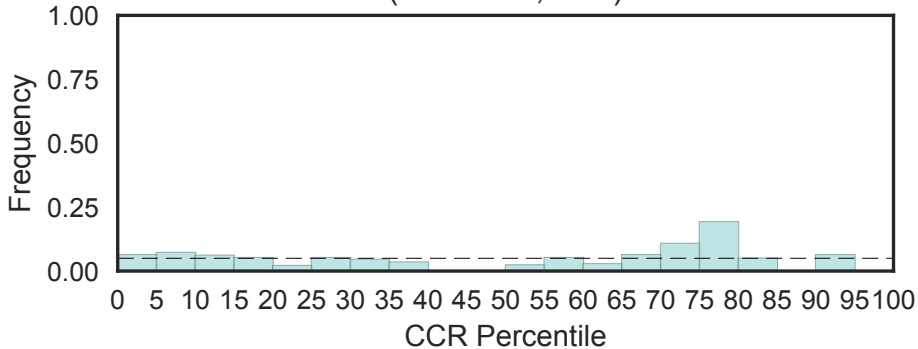

Domain of unknown function (DUF4481)  
(DUF4481, N=1)

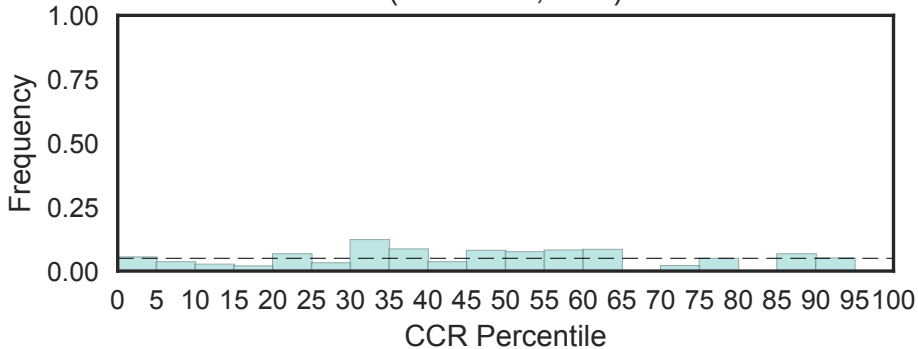

Domain of unknown function (DUF4482)  
(DUF4482, N=3)

Fisher's OR: 0.697; Bonferroni p-val: 1

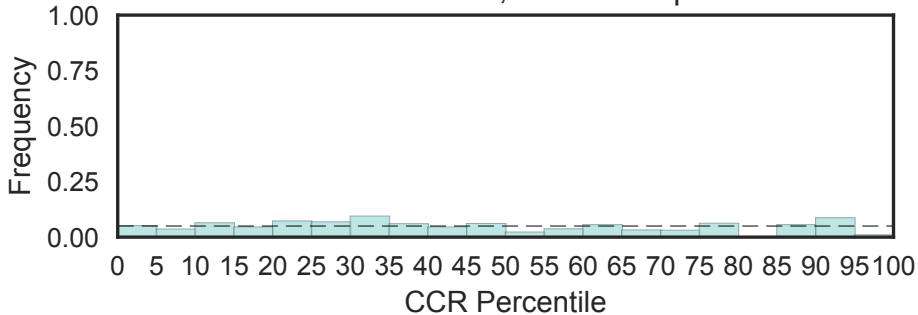

Domain of unknown function (DUF4483)  
(DUF4483, N=1)

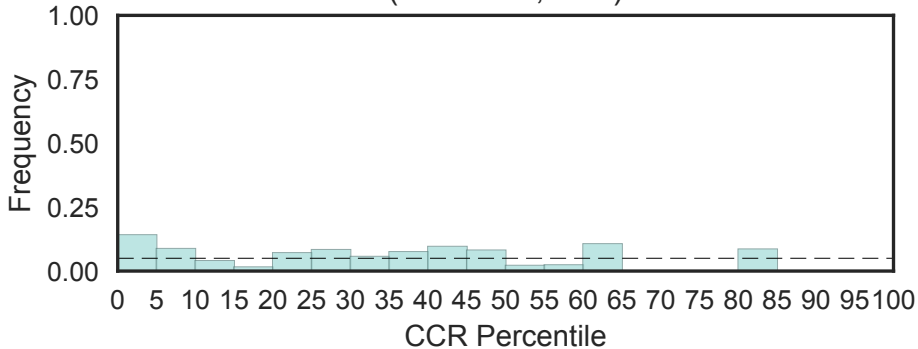

Domain of unknown function (DUF4485)  
(DUF4485, N=1)

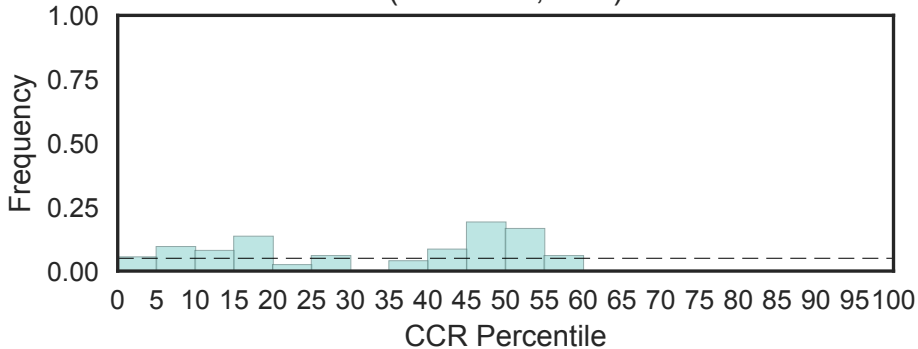

Domain of unknown function (DUF4486)  
(DUF4486, N=1)

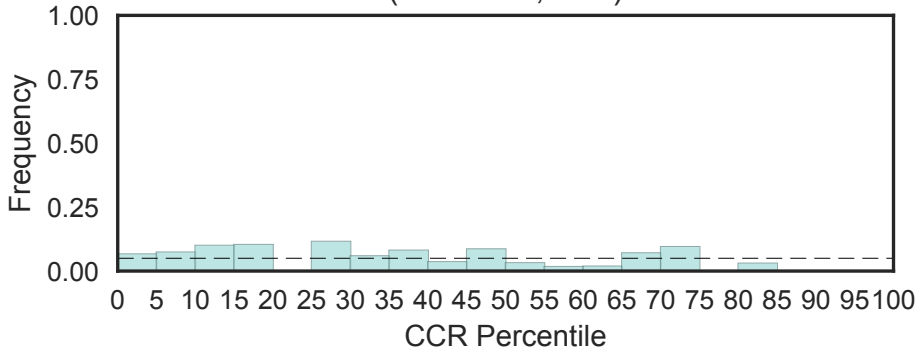



Domain of unknown function (DUF4487)  
(DUF4487, N=1)

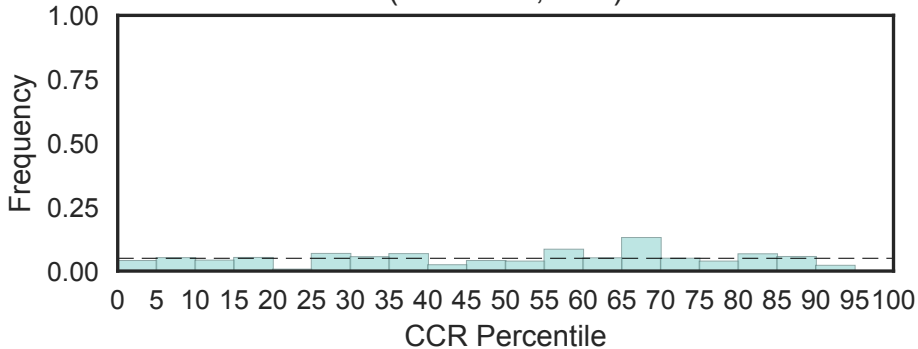

Domain of unknown function (DUF4490)  
(DUF4490, N=2)

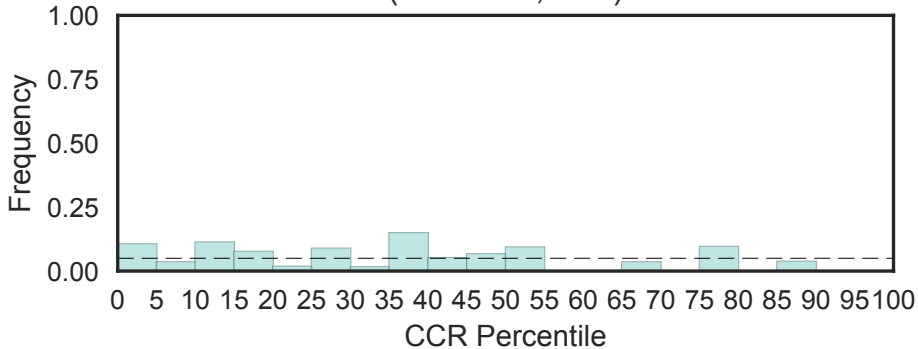

Domain of unknown function (DUF4495)  
(DUF4495, N=1)

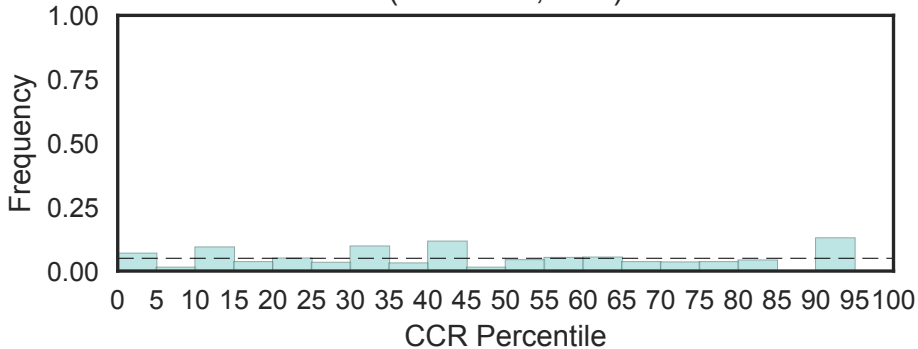

Domain of unknown function (DUF4496)  
(DUF4496, N=1)

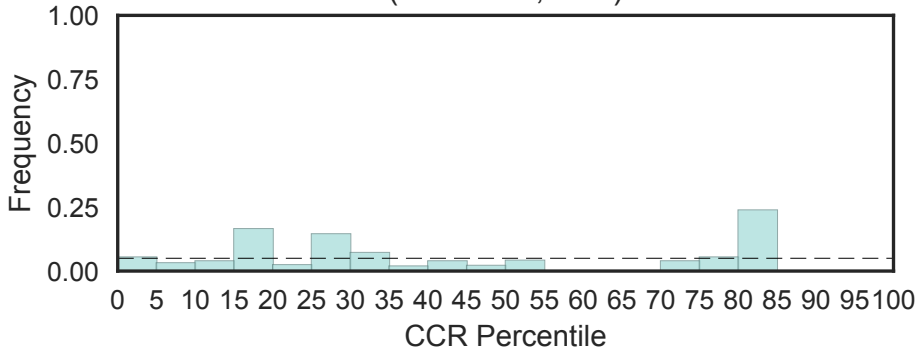

Protein of unknown function (DUF4497)  
(DUF4497, N=1)

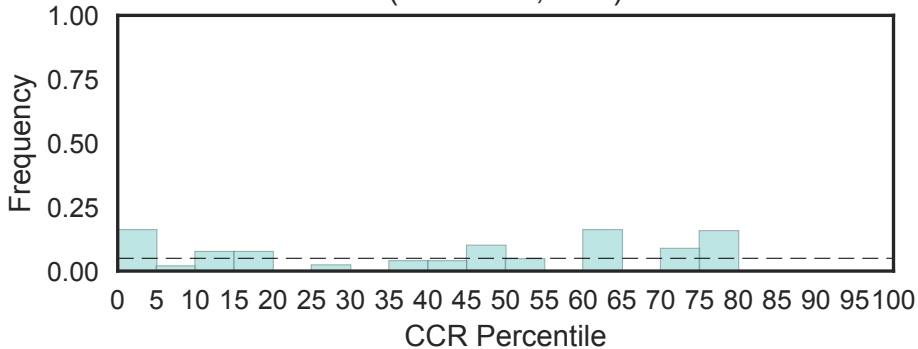

Domain of unknown function (DUF4498)  
(DUF4498, N=1)

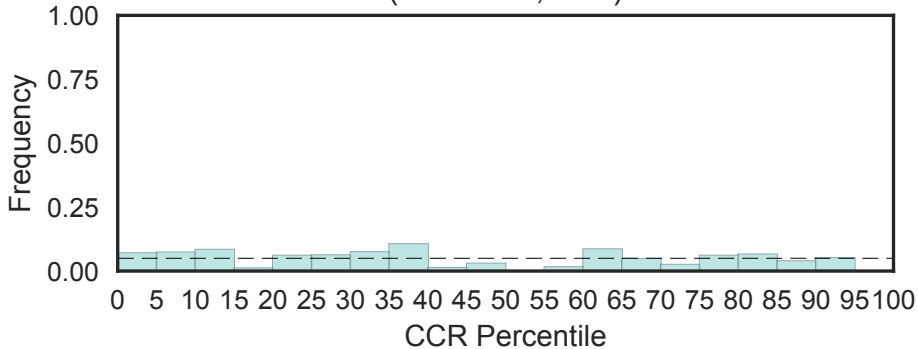

Domain of unknown function (DUF4499)  
(DUF4499, N=1)

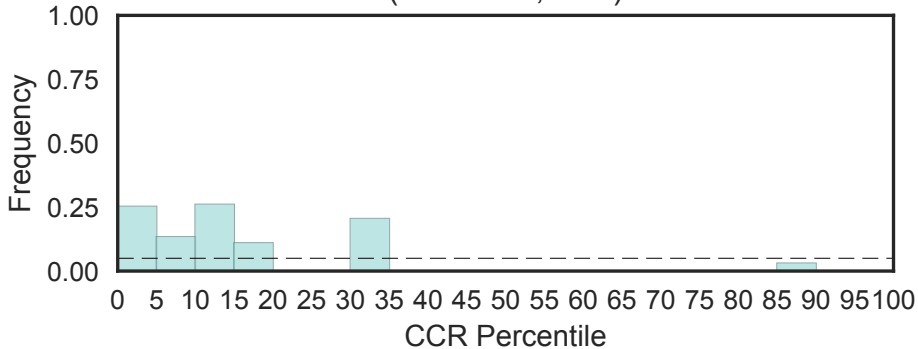

Domain of unknown function (DUF4500)  
(DUF4500, N=1)

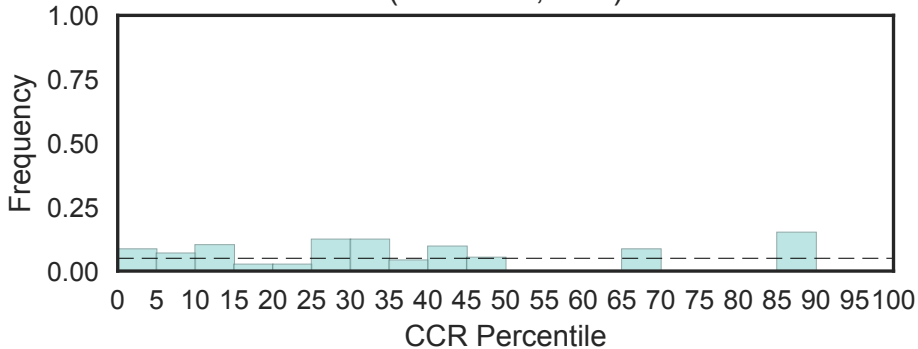



Domain of unknown function (DUF4501)  
(DUF4501, N=2)

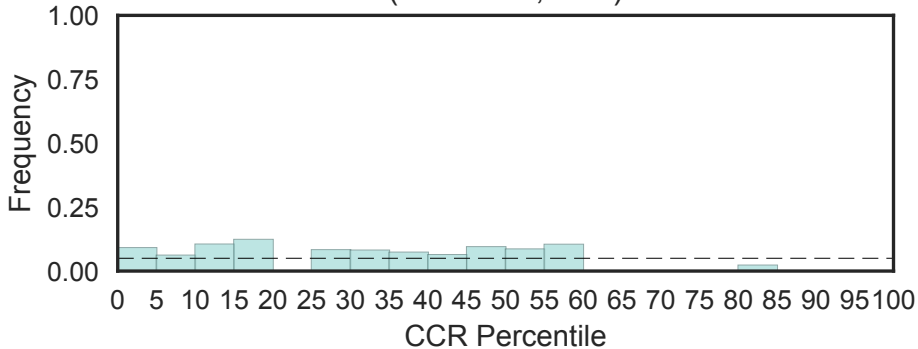

Domain of unknown function (DUF4502)  
(DUF4502, N=1)

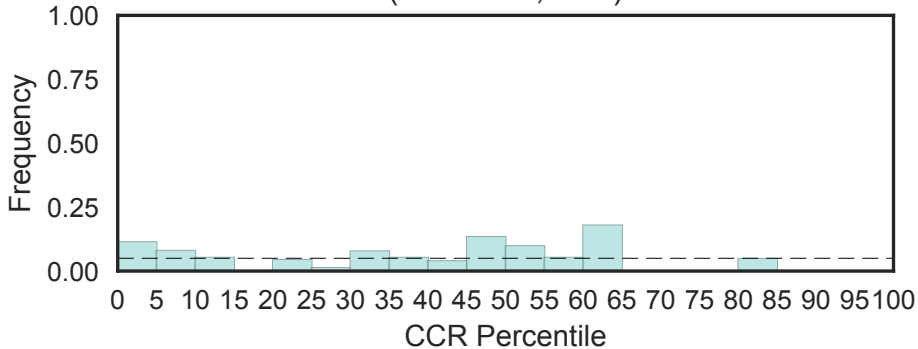

Domain of unknown function (DUF4503)  
(DUF4503, N=1)

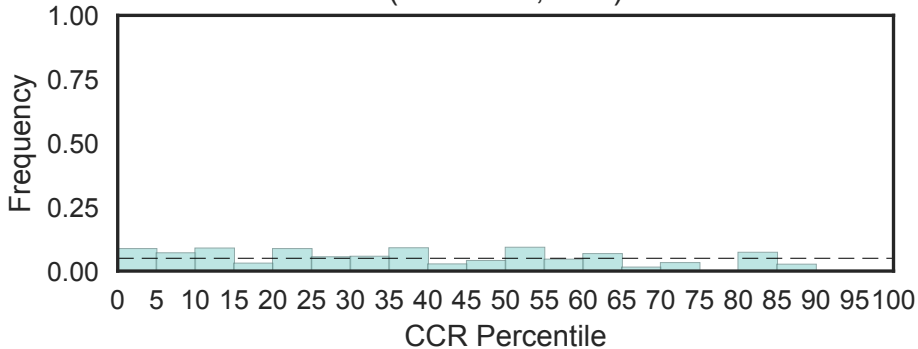

Domain of unknown function (DUF4504)  
(DUF4504, N=1)

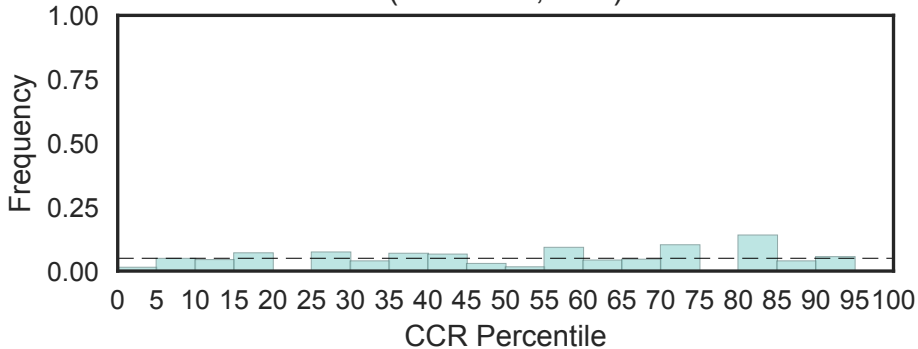

Domain of unknown function (DUF4505)  
(DUF4505, N=1)

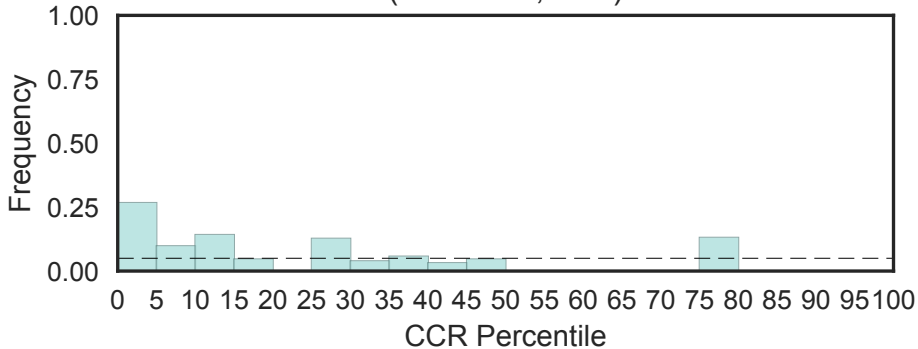

Domain of unknown function (DUF4506)  
(DUF4506, N=1)

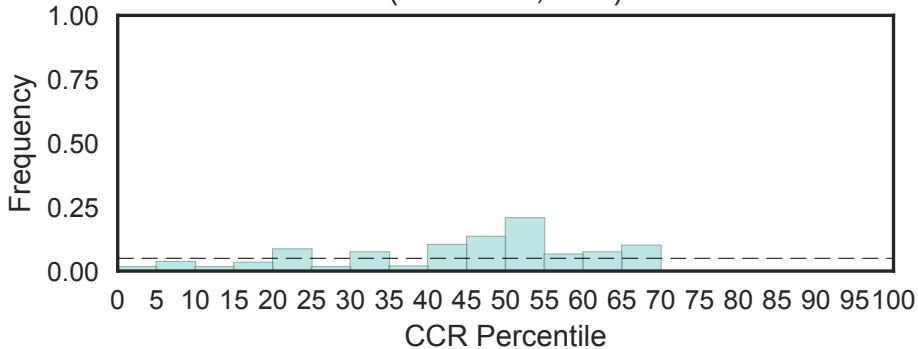

Domain of unknown function (DUF4507)  
(DUF4507, N=1)

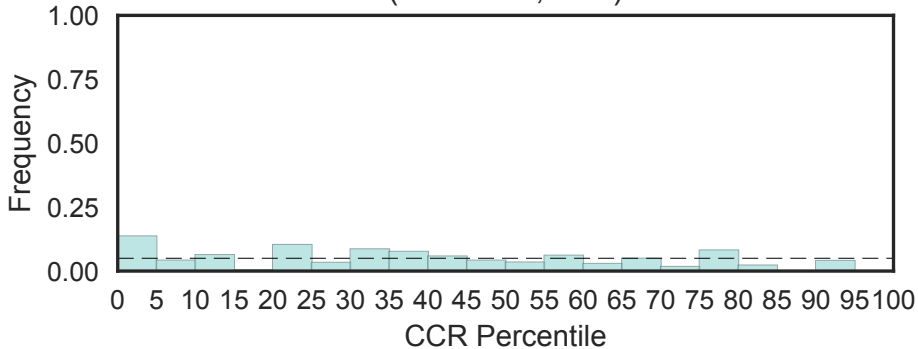

Domain of unknown function (DUF4508)  
(DUF4508, N=1)

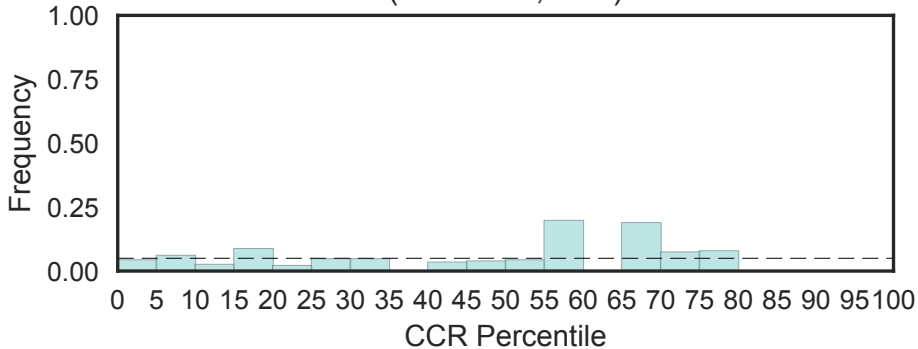



Domain of unknown function (DUF4509)  
(DUF4509, N=1)

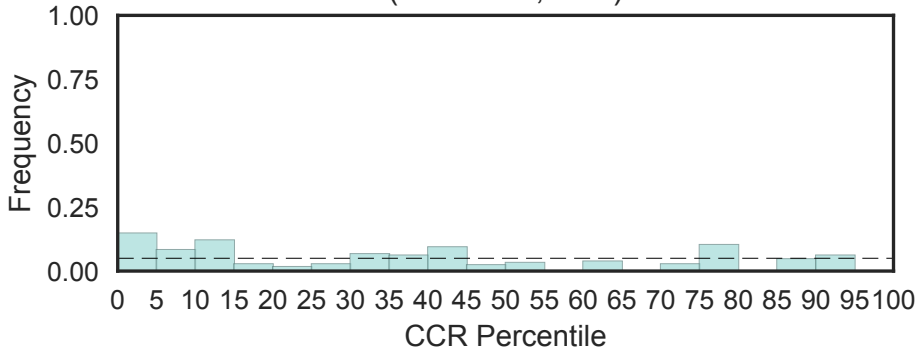

Domain of unknown function (DUF4510)  
(DUF4510, N=1)

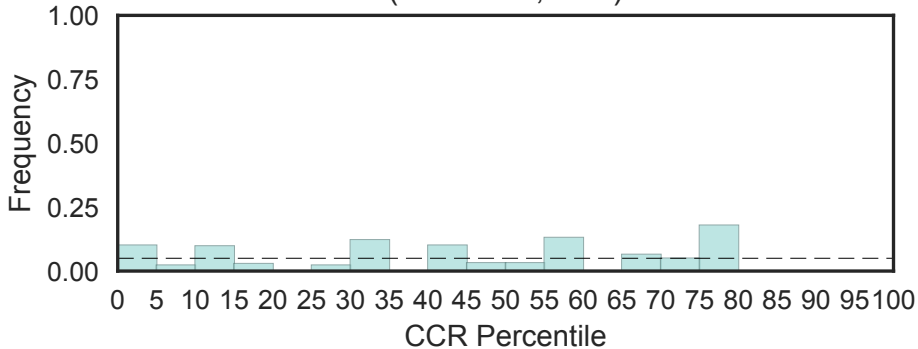

Domain of unknown function (DUF4512)  
(DUF4512, N=2)

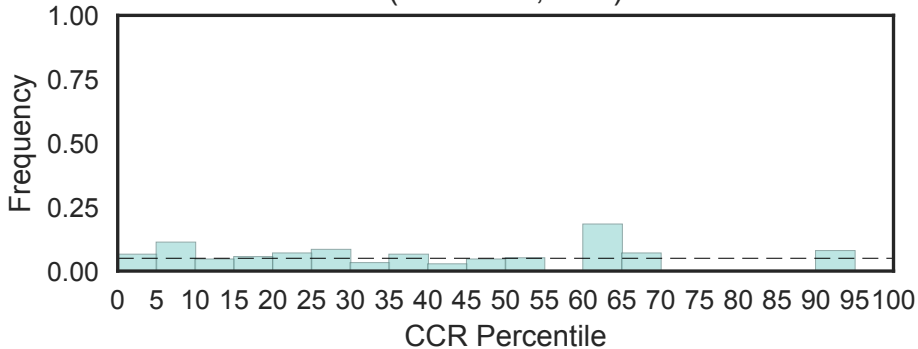

Domain of unknown function (DUF4513)  
(DUF4513, N=1)

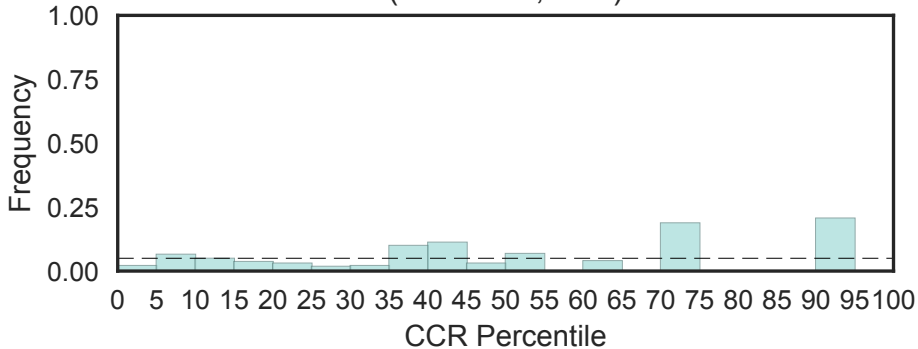

Domain of unknown function (DUF4514)  
(DUF4514, N=1)

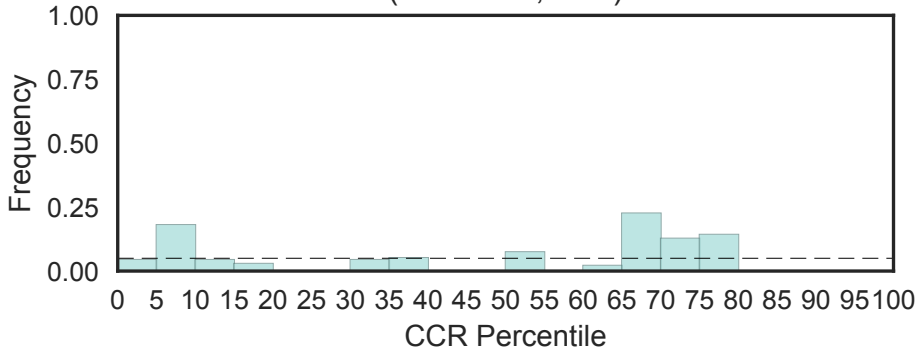

Domain of unknown function (DUF4515)  
(DUF4515, N=3)

Fisher's OR: 0; Bonferroni p-val: 1

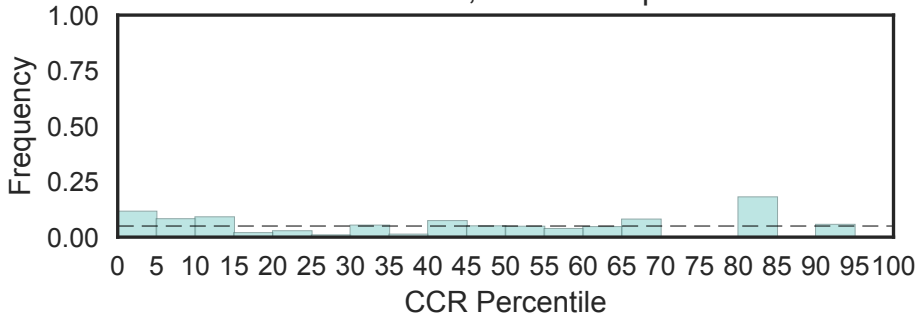

Domain of unknown function (DUF4516)  
(DUF4516, N=2)

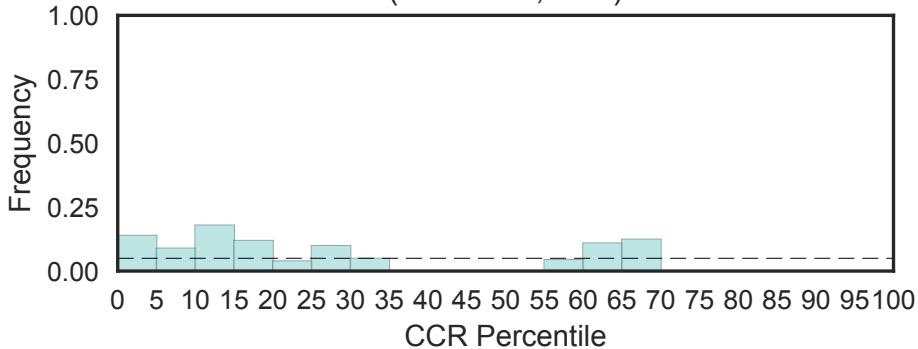

Domain of unknown function (DUF4517)  
(DUF4517, N=1)

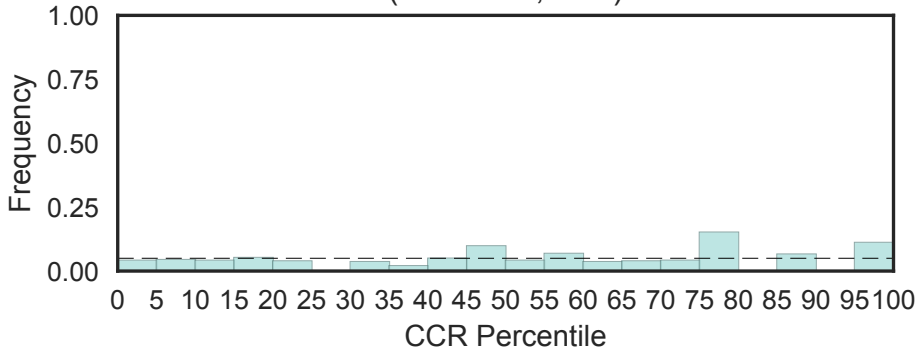



Domain of unknown function (DUF4518)  
(DUF4518, N=1)

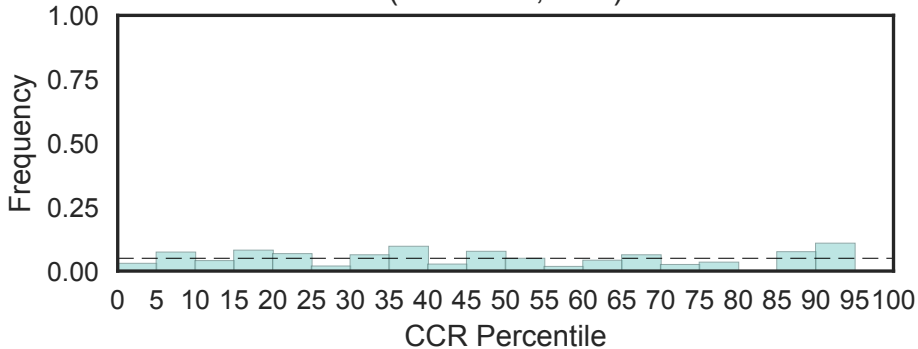

Domain of unknown function (DUF4519)  
(DUF4519, N=1)

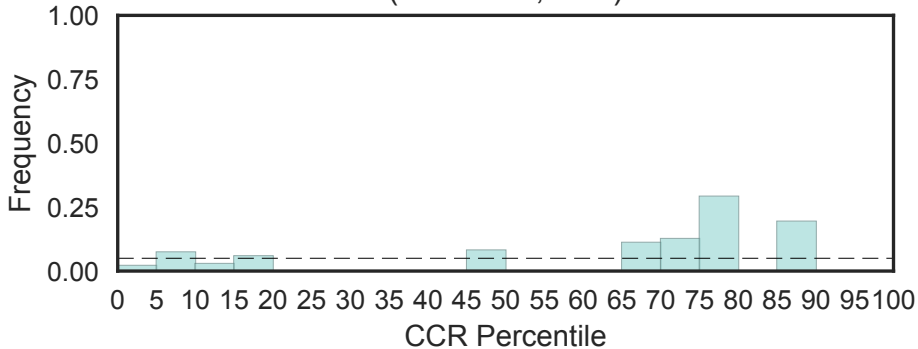

Domain of unknown function (DUF4520)  
(DUF4520, N=1)

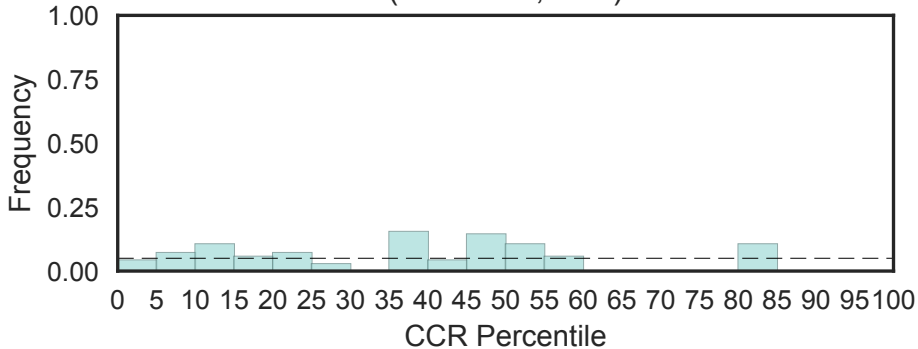

Protein of unknown function (DUF4521)  
(DUF4521, N=1)

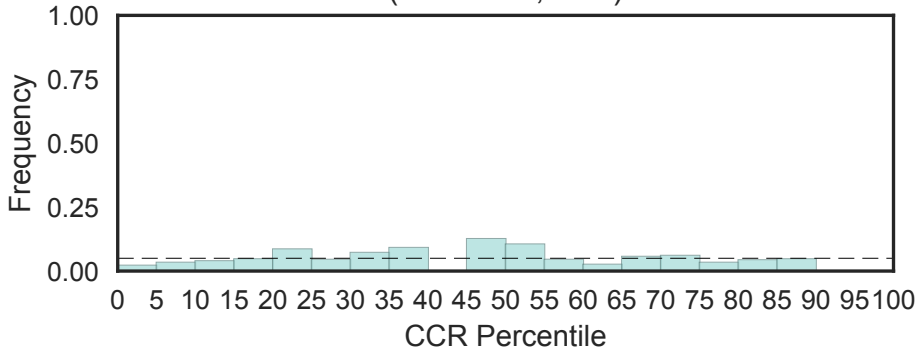

Protein of unknown function (DUF4522)  
(DUF4522, N=1)

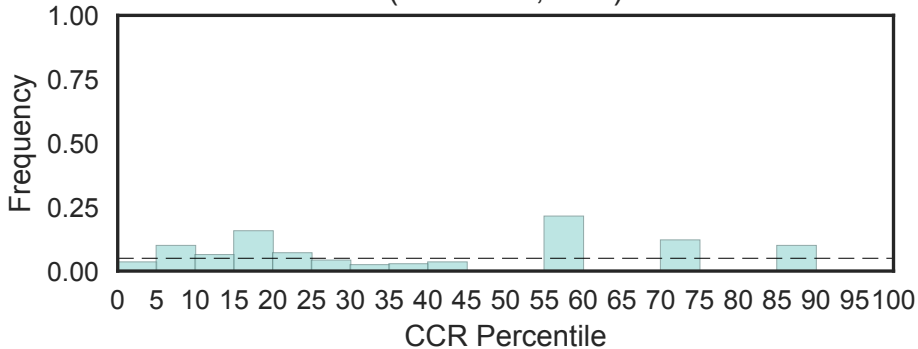

Protein of unknown function (DUF4523)  
(DUF4523, N=2)

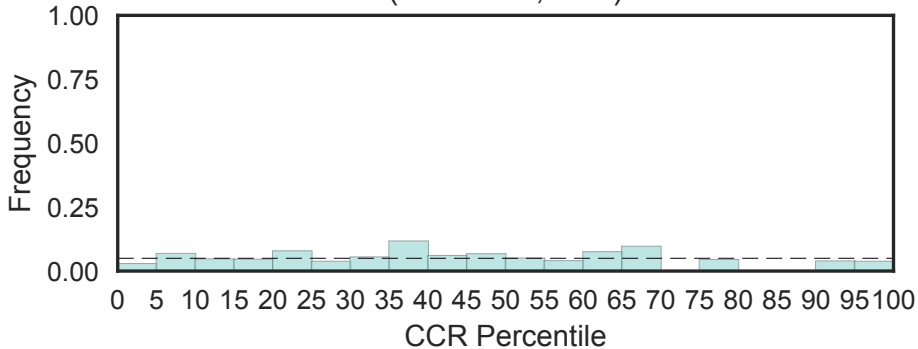

Domain of unknown function (DUF4524)  
(DUF4524, N=1)

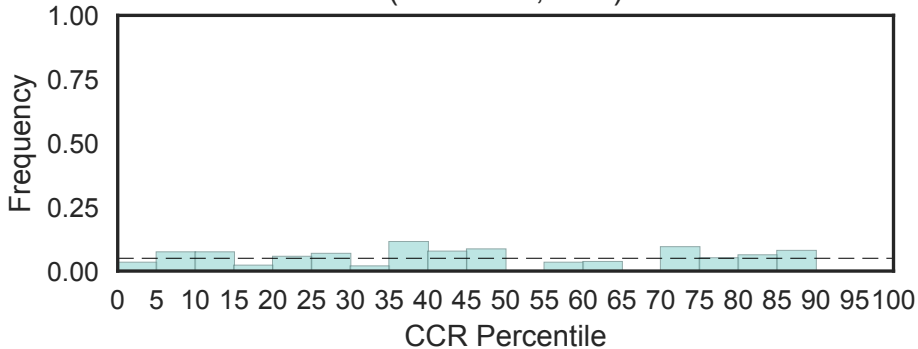

Domain of unknown function (DUF4525)  
(DUF4525, N=2)

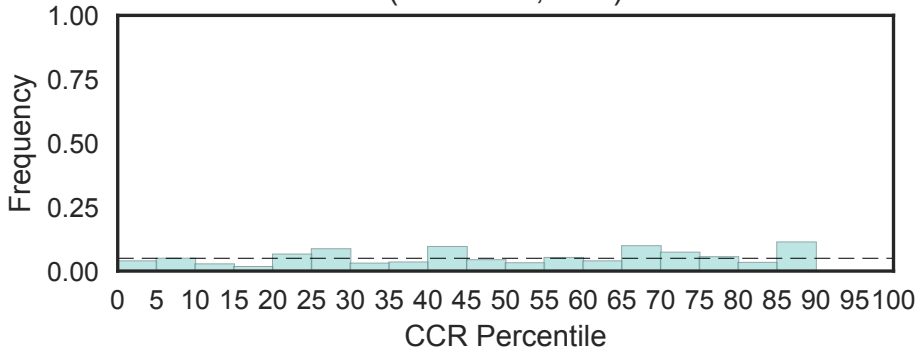



Domain of unknown function (DUF4528)  
(DUF4528, N=1)

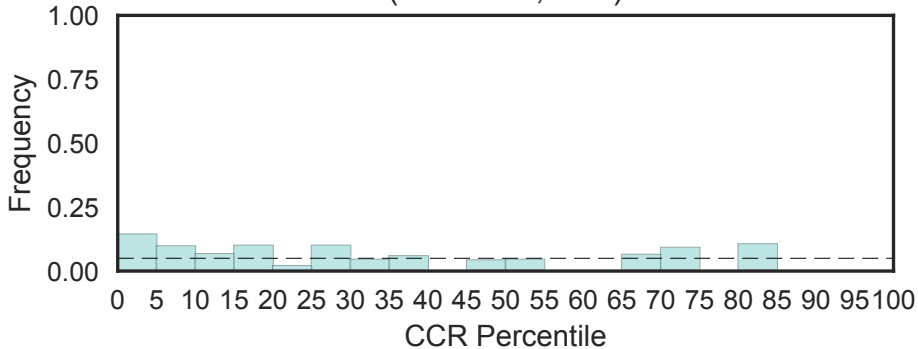

Protein of unknown function (DUF4529)  
(DUF4529, N=1)

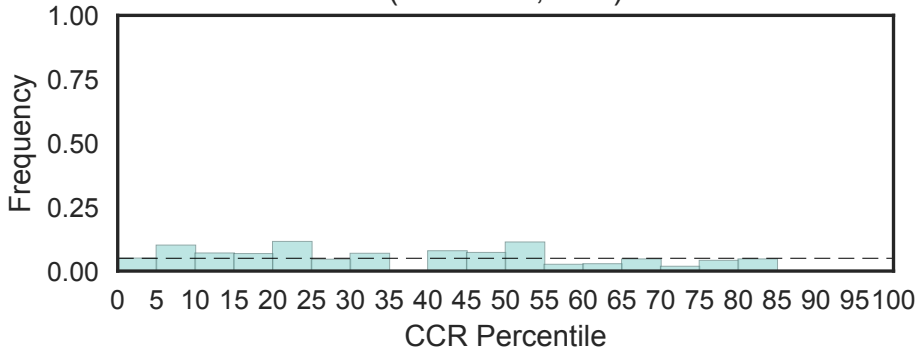

Domain of unknown function (DUF4530)  
(DUF4530, N=1)

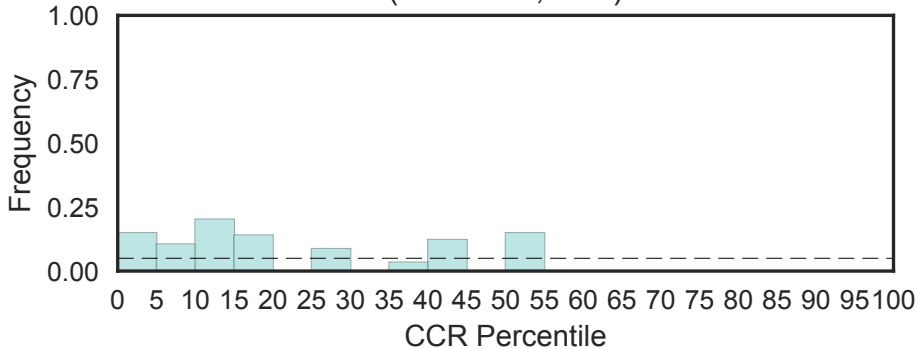

Domain of unknown function (DUF4531)  
(DUF4531, N=2)

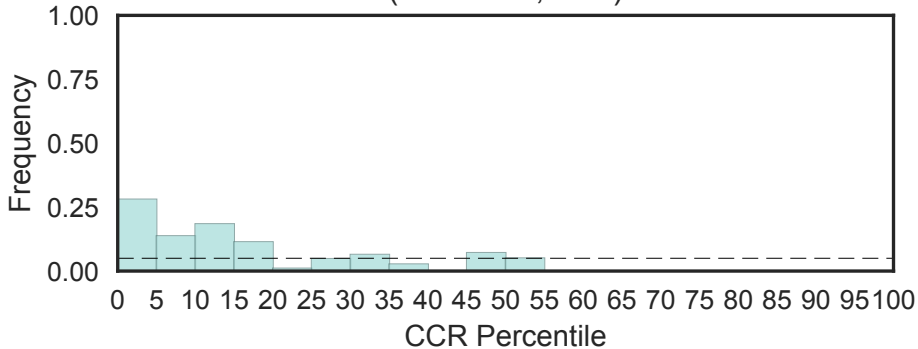

Protein of unknown function (DUF4533)  
(DUF4533, N=2)

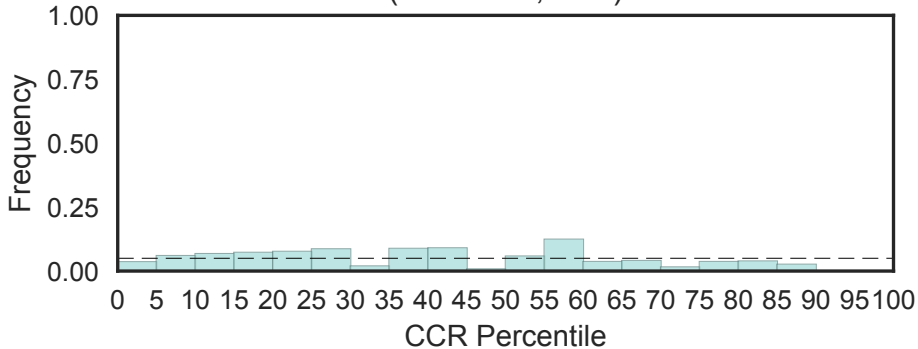

Protein of unknown function (DUF4534)  
(DUF4534, N=1)

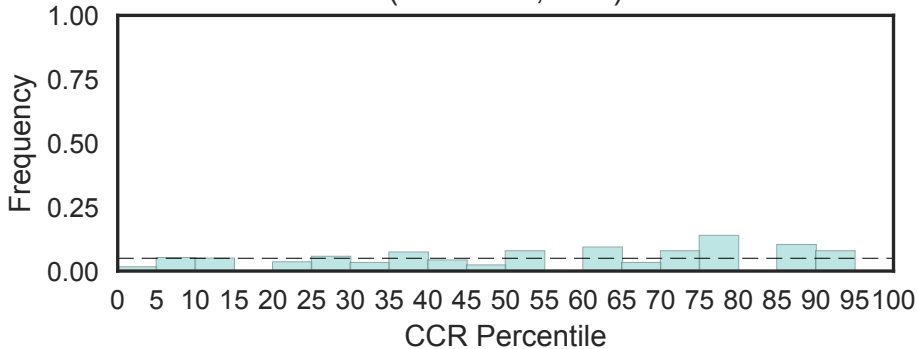

Domain of unknown function (DUF4535)  
(DUF4535, N=1)

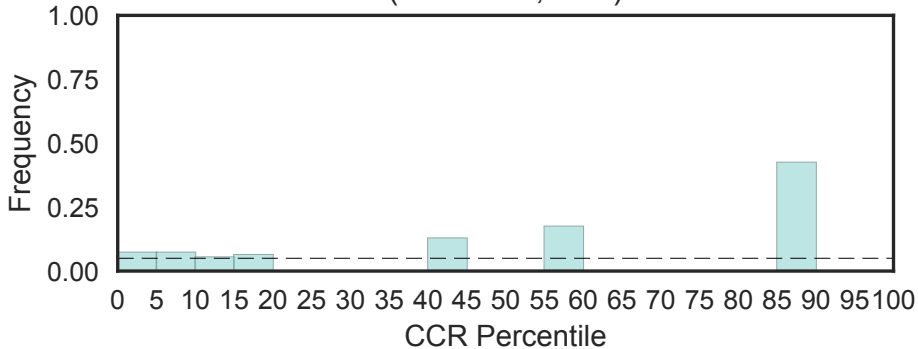

Domain of unknown function (DUF4537)  
(DUF4537, N=2)

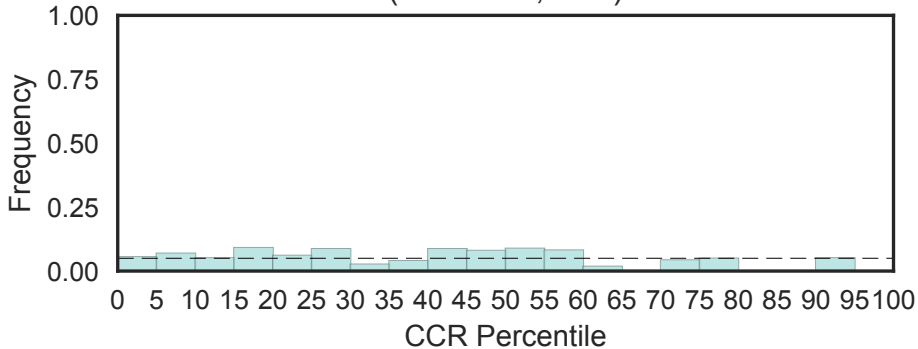



Domain of unknown function (DUF4538)  
(DUF4538, N=1)

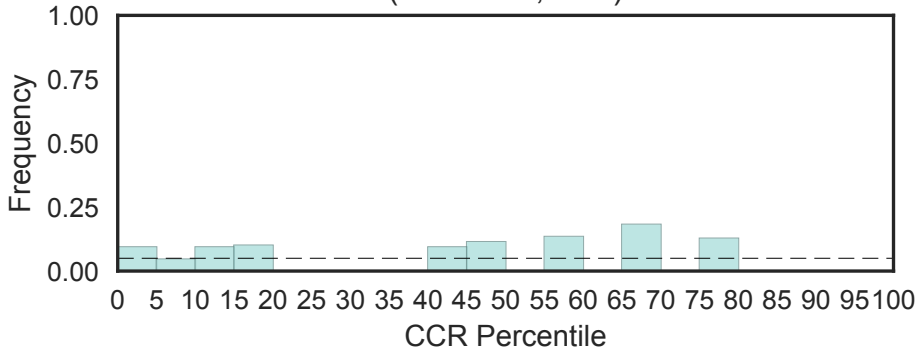

Domain of unknown function (DUF4539)  
(DUF4539, N=1)

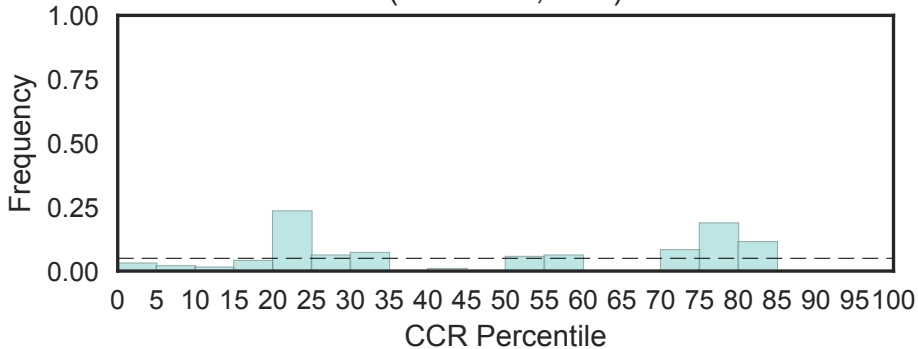

Domain of unknown function (DUF4540)  
(DUF4540, N=1)

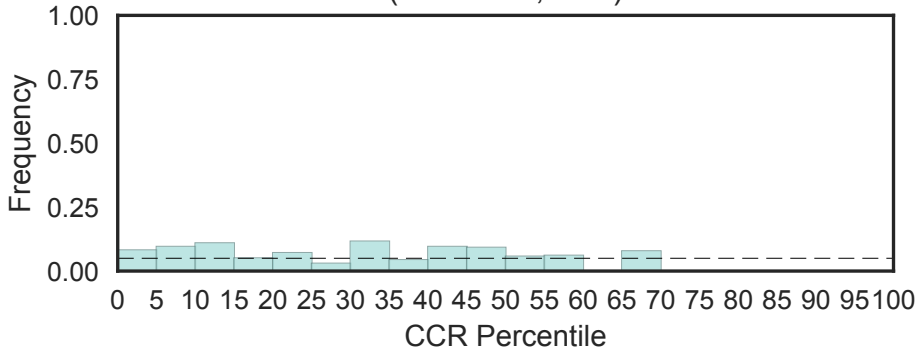

Domain of unknown function (DUF4541)  
(DUF4541, N=1)

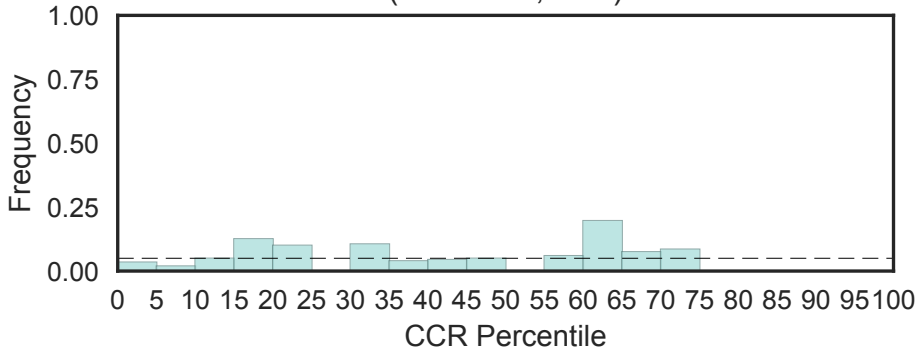

Domain of unknown function (DUF4543)  
(DUF4543, N=1)

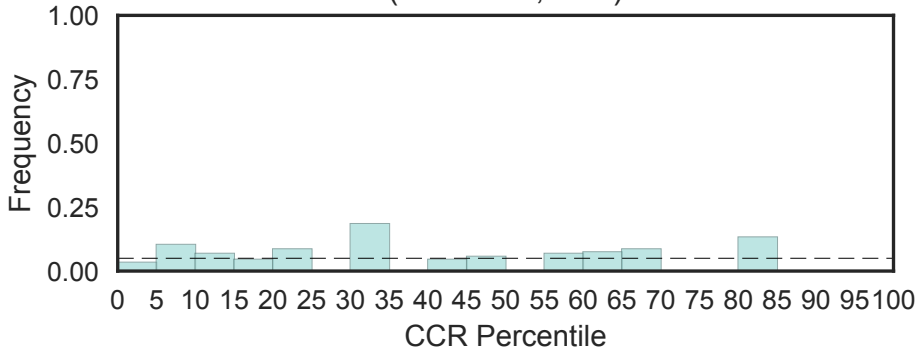

Domain of unknown function (DUF4545)  
(DUF4545, N=1)

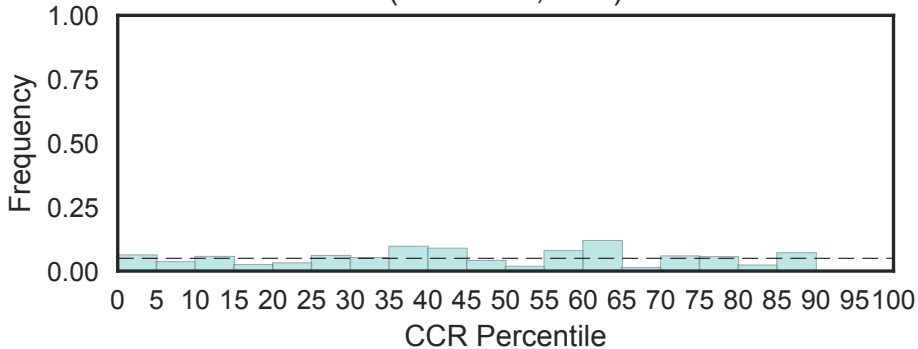

Domain of unknown function (DUF4547)  
(DUF4547, N=1)

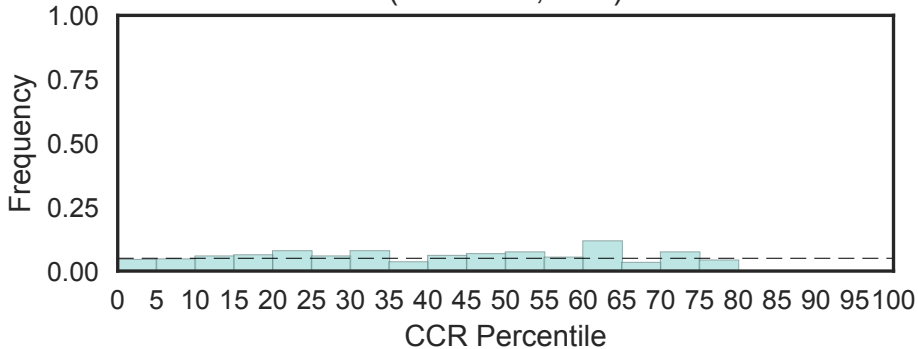

Domain of unknown function (DUF4548)  
(DUF4548, N=1)

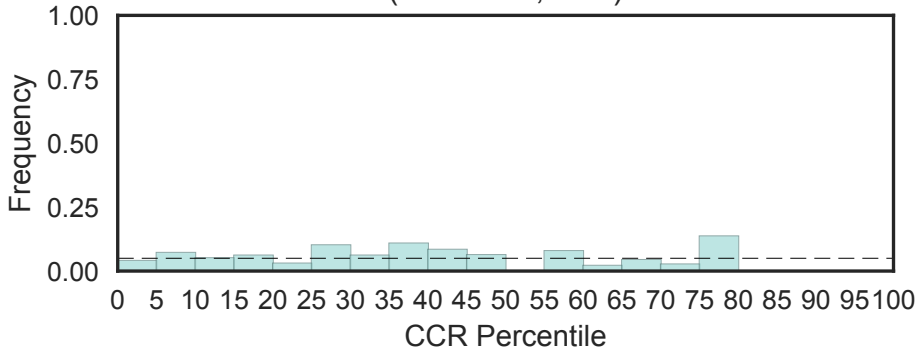



Domain of unknown function (DUF4550)  
(DUF4550, N=1)

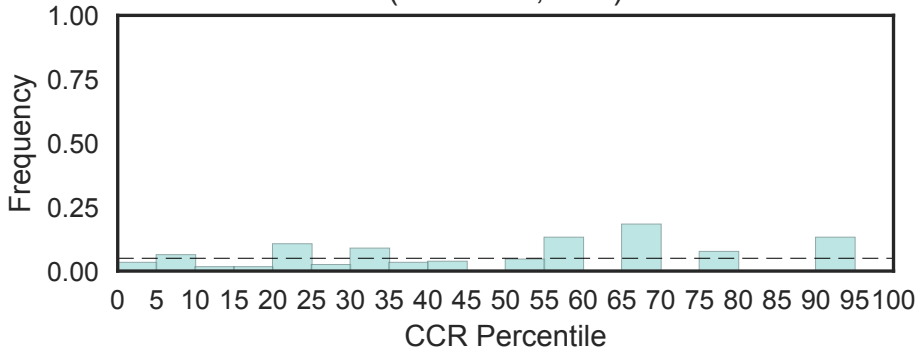

Protein of unknown function (DUF4551)  
(DUF4551, N=2)

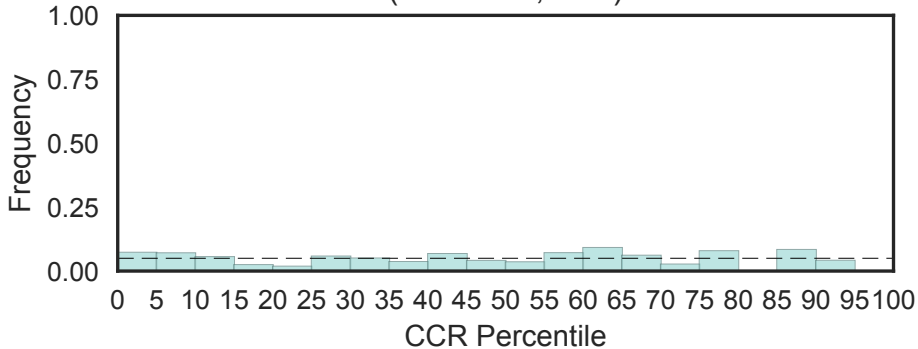

Domain of unknown function (DUF4552)  
(DUF4552, N=1)

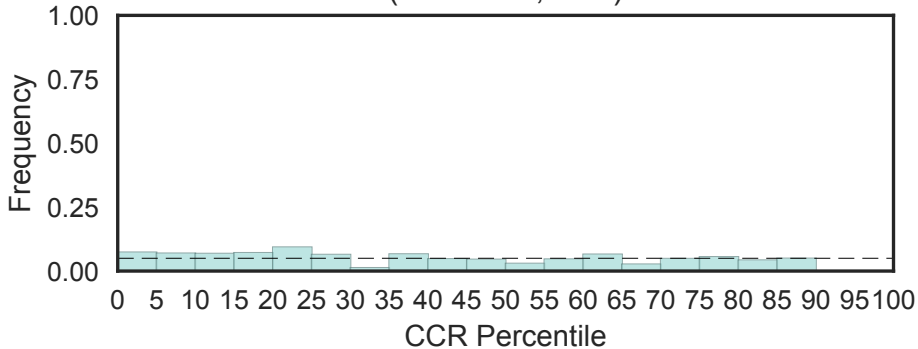

Domain of unknown function (DUF4553)  
(DUF4553, N=1)

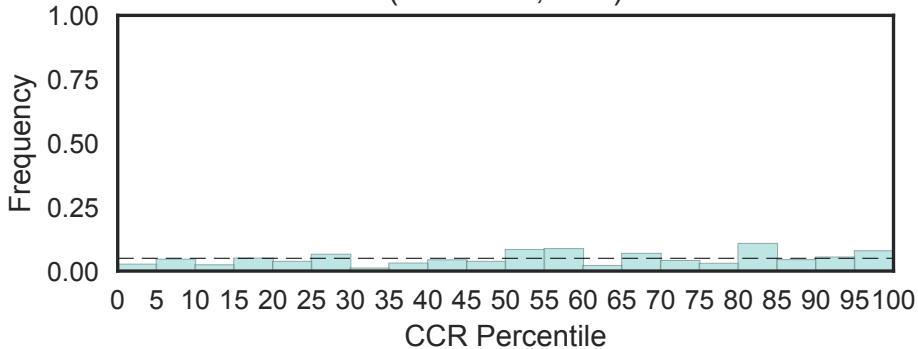

Domain of unknown function (DUF4554)  
(DUF4554, N=1)

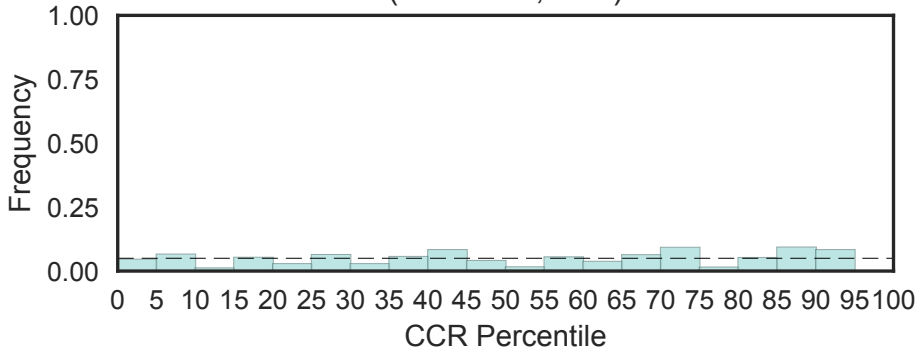

Domain of unknown function (DUF4555)  
(DUF4555, N=1)

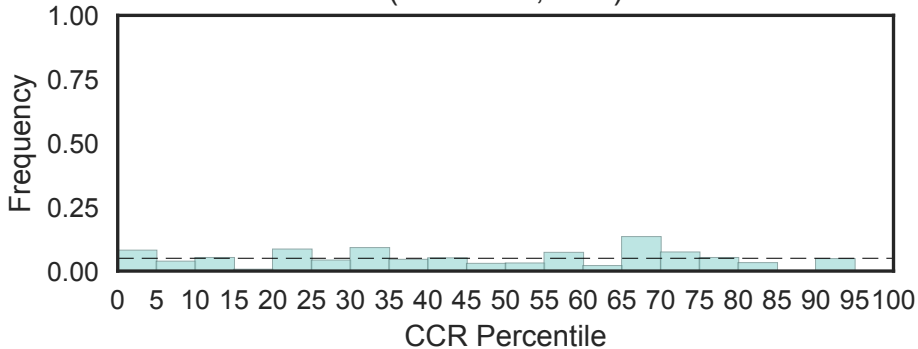

Domain of unknown function (DUF4556)  
(DUF4556, N=1)

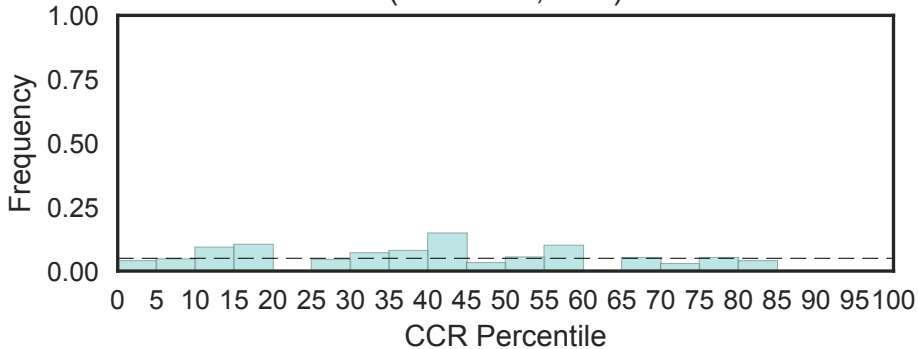

Domain of unknown function (DUF4558)  
(DUF4558, N=1)

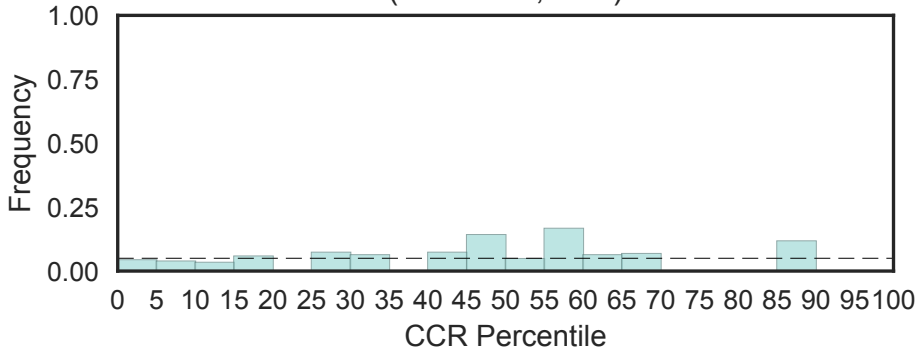



Domain of unknown function (DUF4562)  
(DUF4562, N=1)

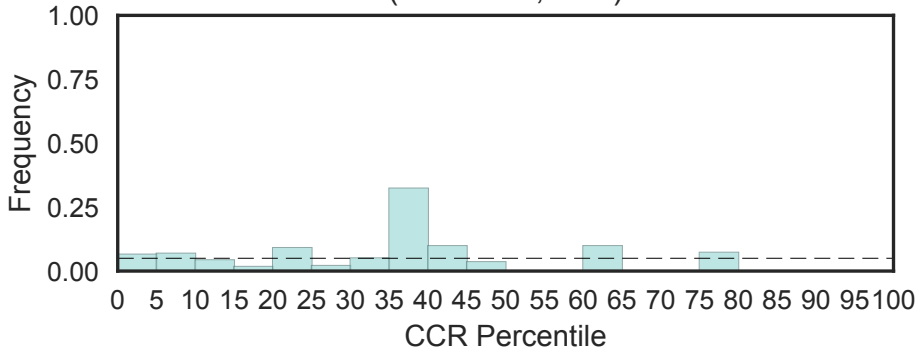

Domain of unknown function (DUF4564)  
(DUF4564, N=1)

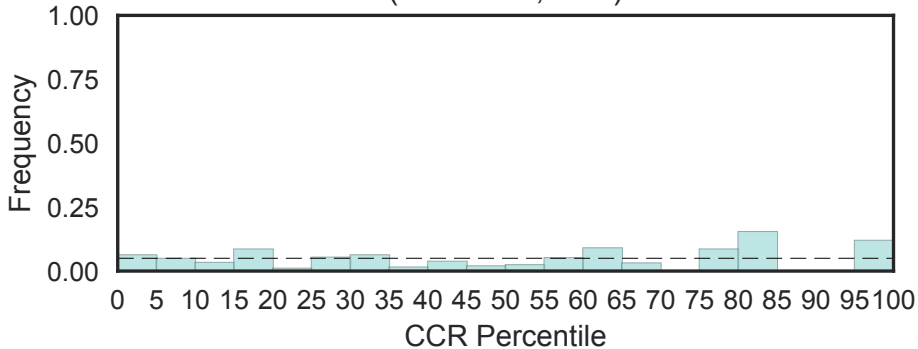

Domain of unknown function (DUF4566)  
(DUF4566, N=1)

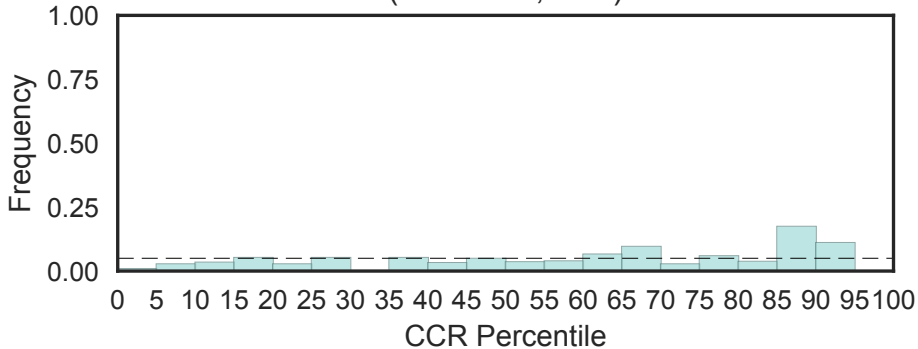

Domain of unknown function (DUF4567)  
(DUF4567, N=1)

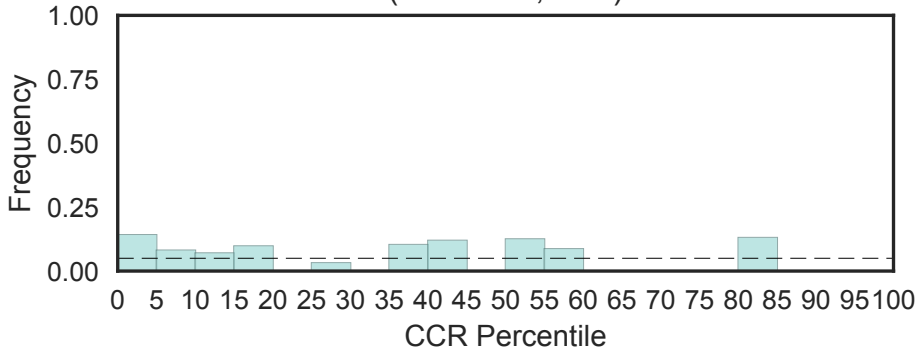

Domain of unknown function (DUF4568)  
(DUF4568, N=2)

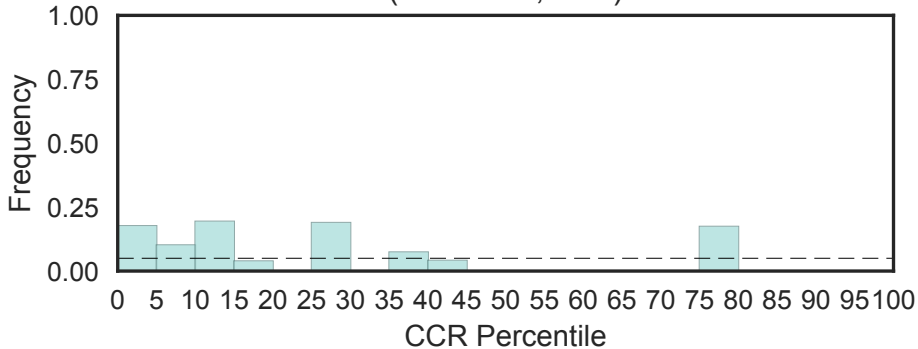

Domain of unknown function (DUF4570)  
(DUF4570, N=1)

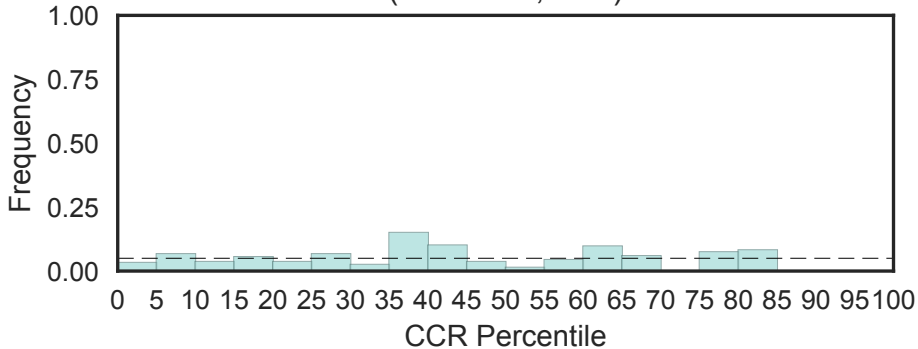

Domain of unknown function (DUF4571)  
(DUF4571, N=1)

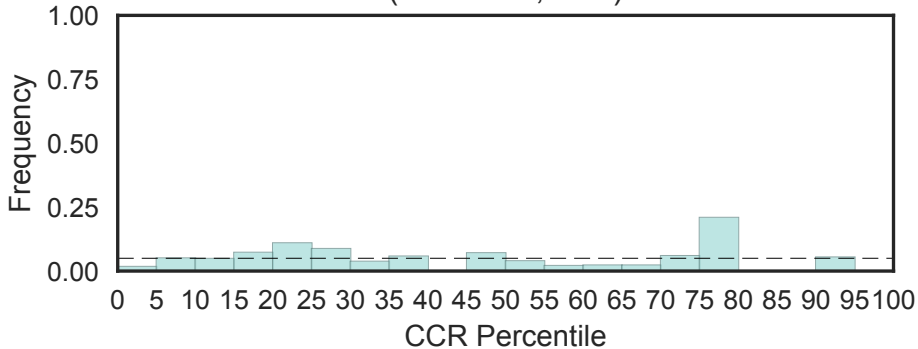

Domain of unknown function (DUF4572)  
(DUF4572, N=1)

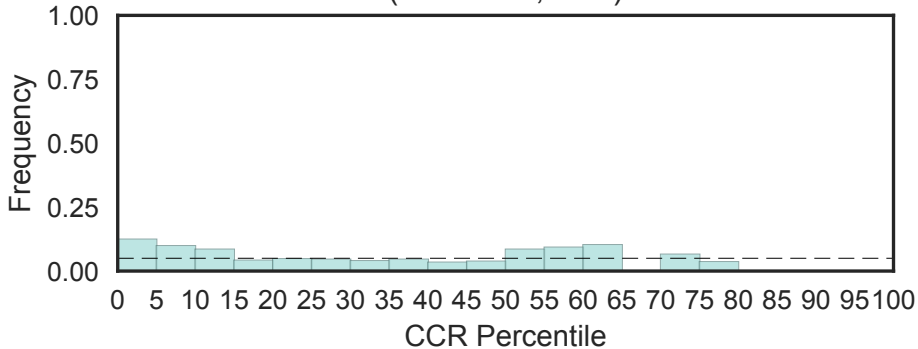



Domain of unknown function (DUF4573)  
(DUF4573, N=1)

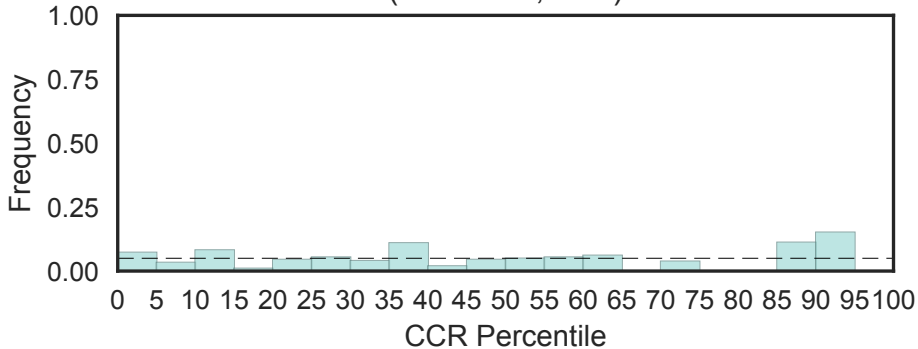

Domain of unknown function (DUF4574)  
(DUF4574, N=1)

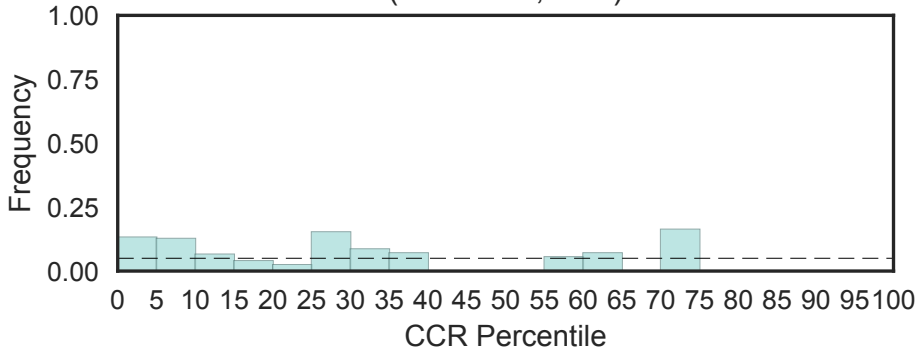

Domain of unknown function (DUF4576)  
(DUF4576, N=1)

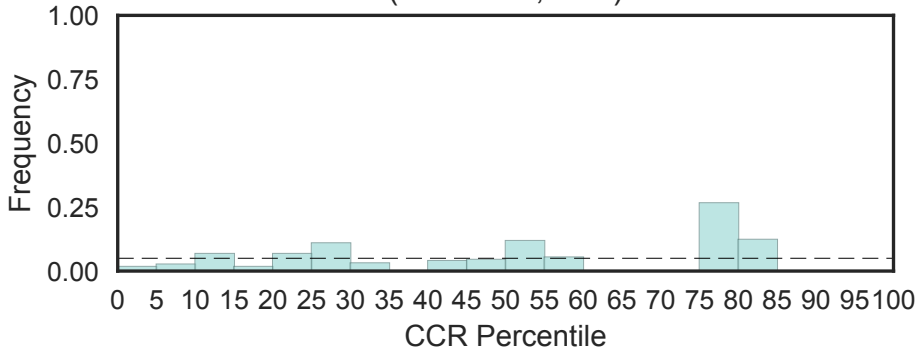

Domain of unknown function (DUF4577)  
(DUF4577, N=1)

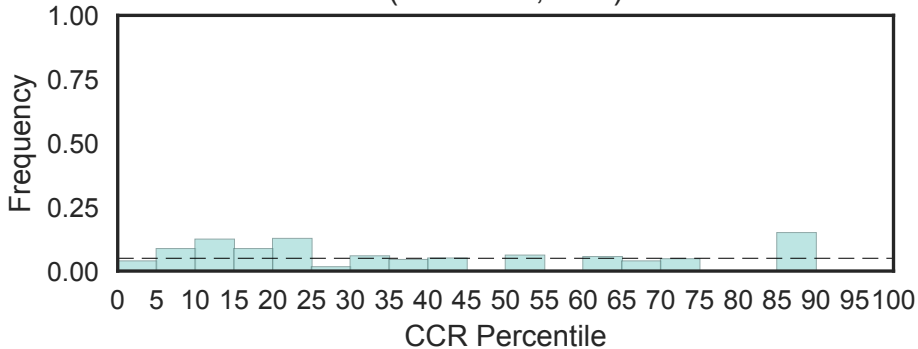

Domain of unknown function (DUF4578)  
(DUF4578, N=1)

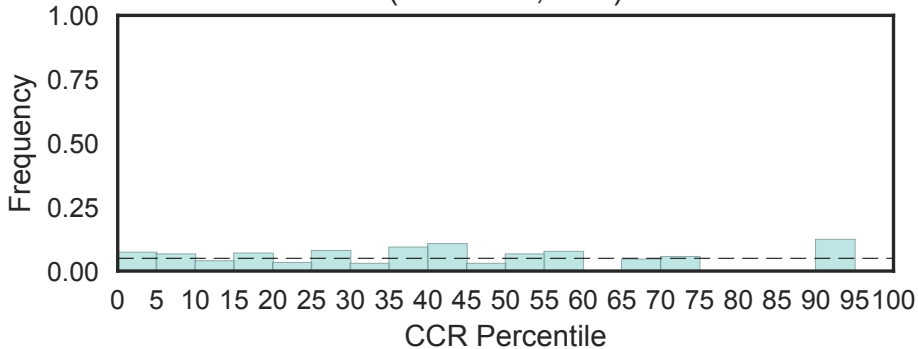

Domain of unknown function (DUF4579)  
(DUF4579, N=1)

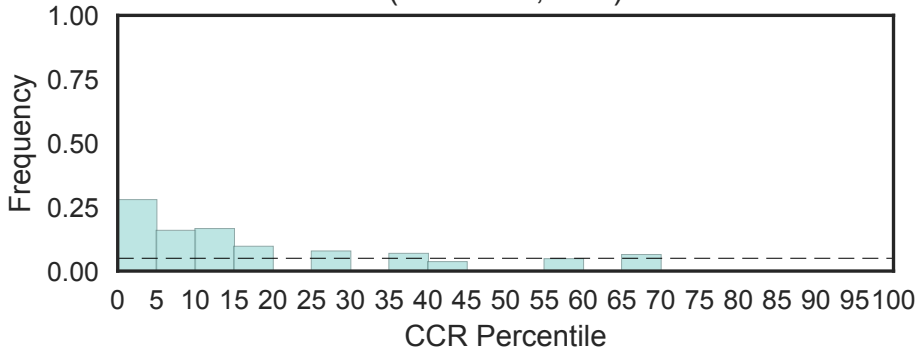

Domain of unknown function (DUF4580)  
(DUF4580, N=1)

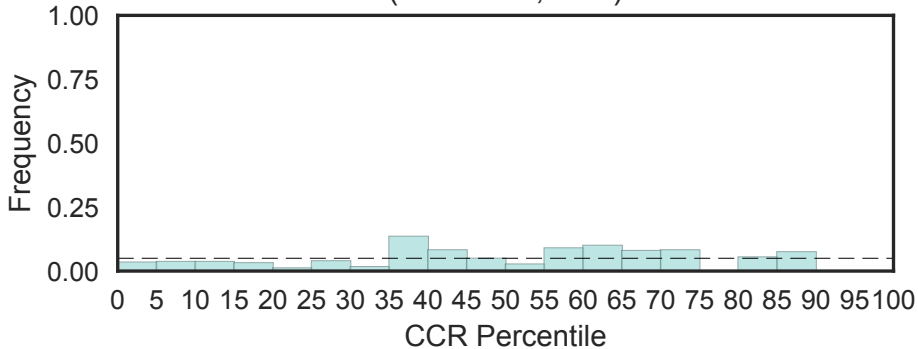

Domain of unknown function (DUF4581)  
(DUF4581, N=1)

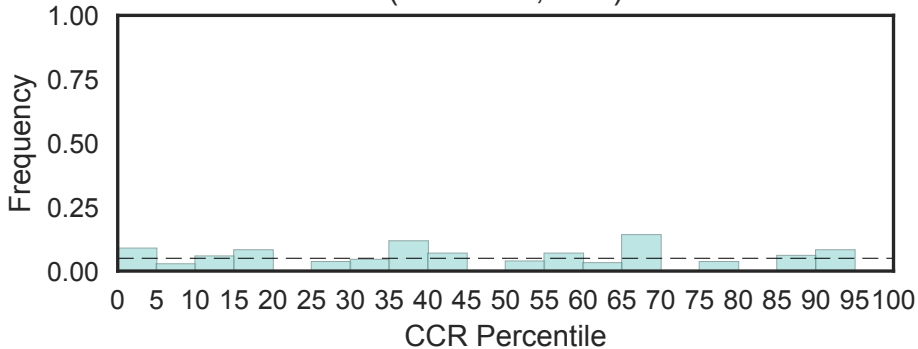



Domain of unknown function (DUF4584)  
(DUF4584, N=2)

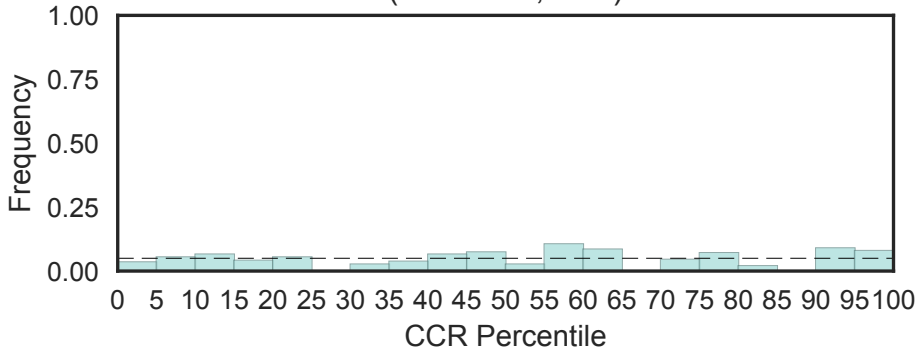

Domain of unknown function (DUF4585)  
(DUF4585, N=3)

Fisher's OR: 0; Bonferroni p-val: 1

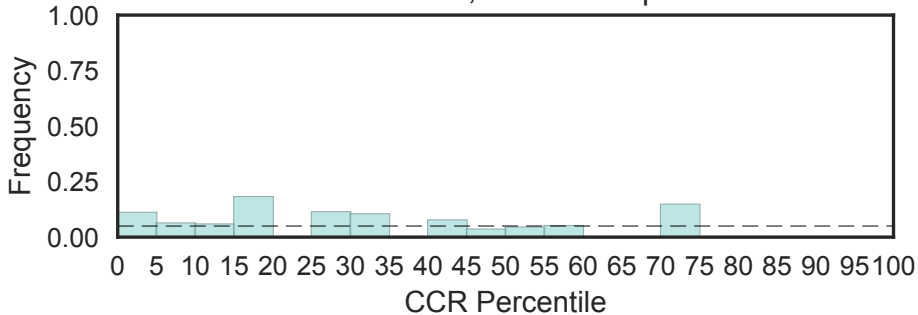

Domain of unknown function (DUF4586)  
(DUF4586, N=1)

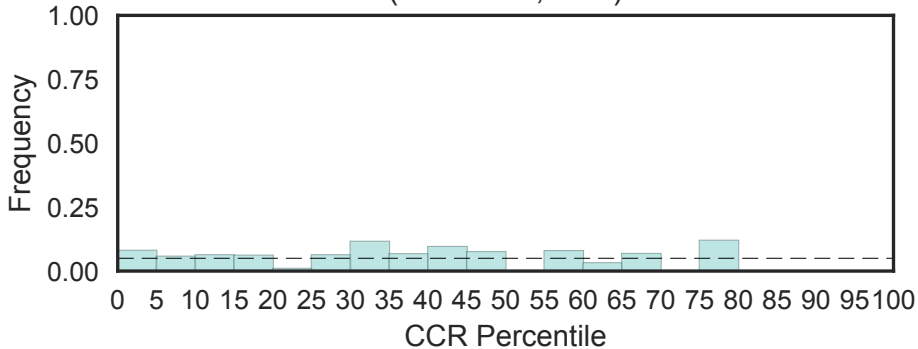

Domain of unknown function (DUF4587)  
(DUF4587, N=2)

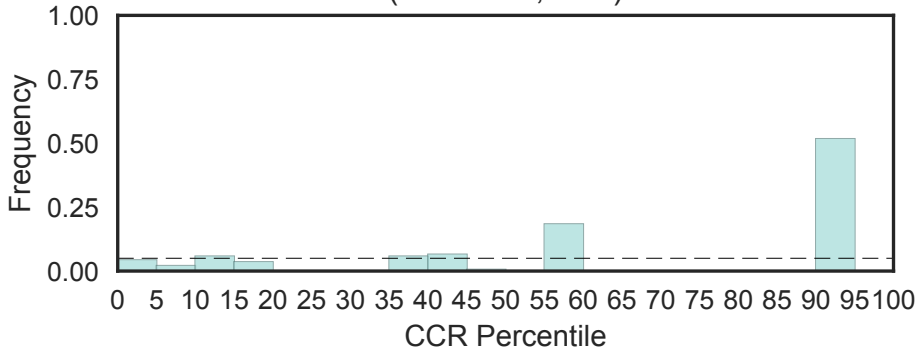

Domain of unknown function (DUF4588)  
(DUF4588, N=1)

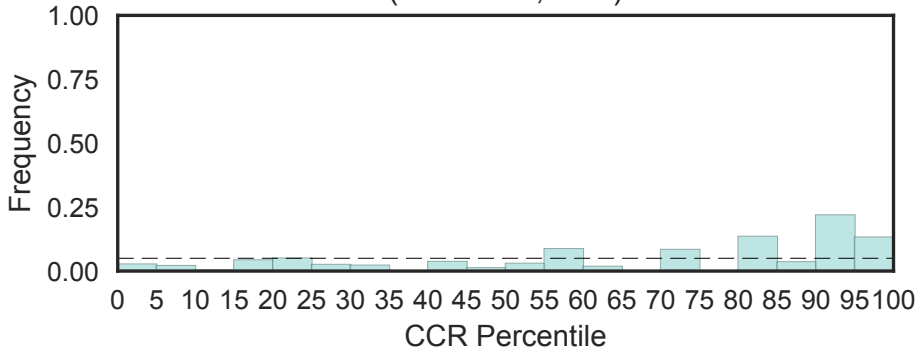

Domain of unknown function (DUF4589)  
(DUF4589, N=2)

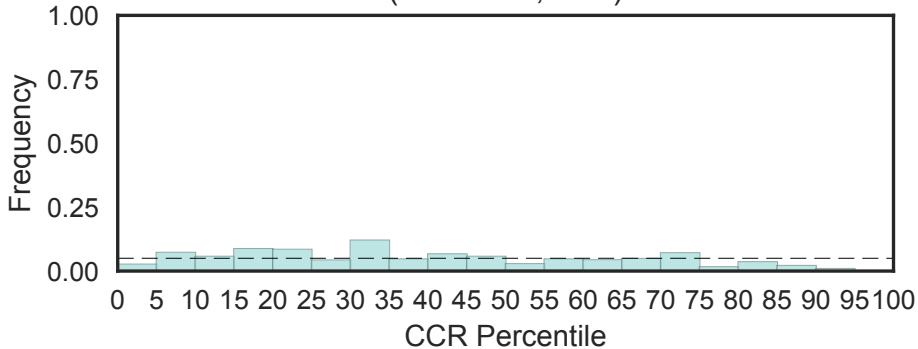

Domain of unknown function (DUF4590)  
(DUF4590, N=1)

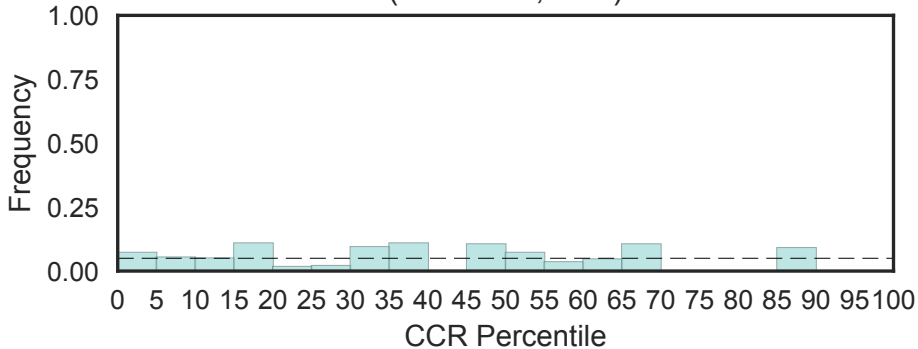

Domain of unknown function (DUF4591)  
(DUF4591, N=1)

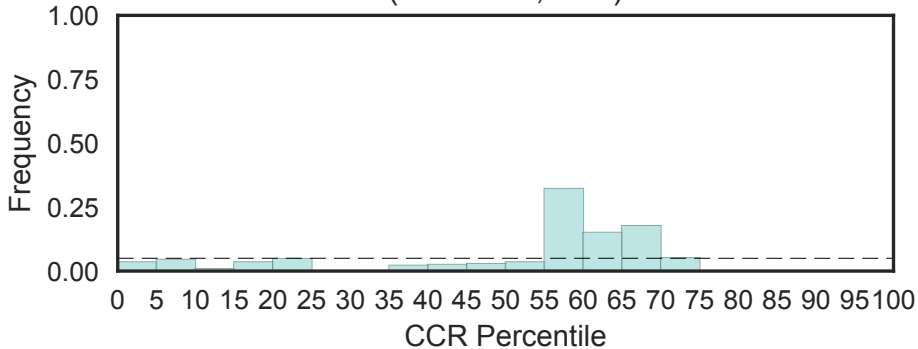



Domain of unknown function (DUF4592)  
(DUF4592, N=2)

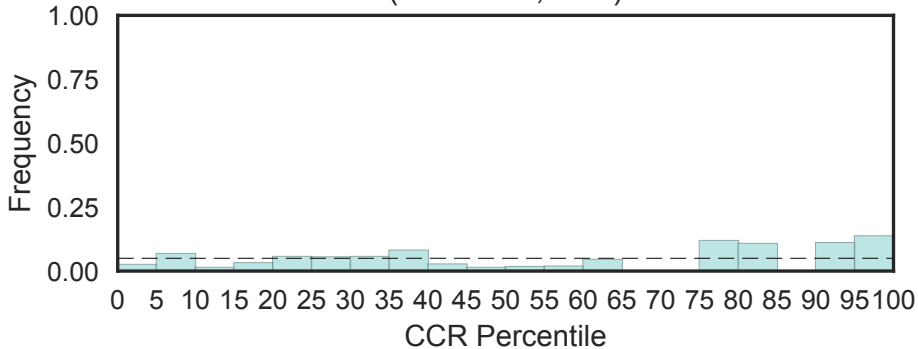

Domain of unknown function (DUF4594)  
(DUF4594, N=2)

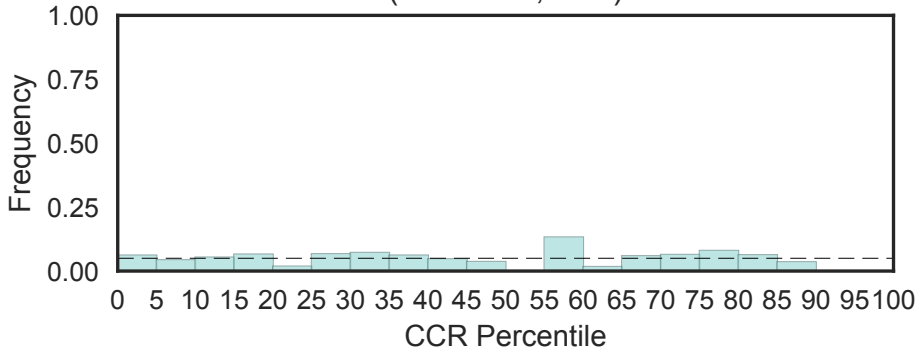

Domain of unknown function (DUF4596)  
(DUF4596, N=2)

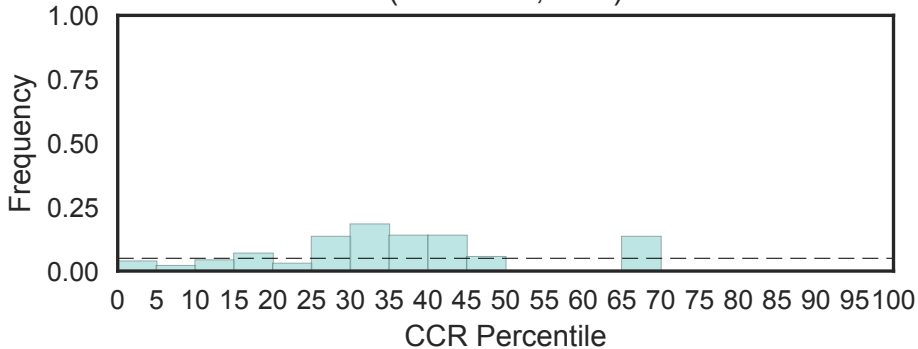

Domain of unknown function (DUF4597)  
(DUF4597, N=1)

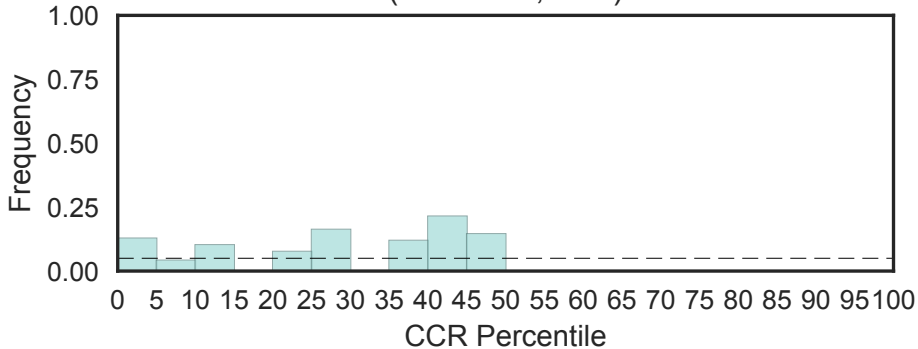

Domain of unknown function (DUF4598)  
(DUF4598, N=1)

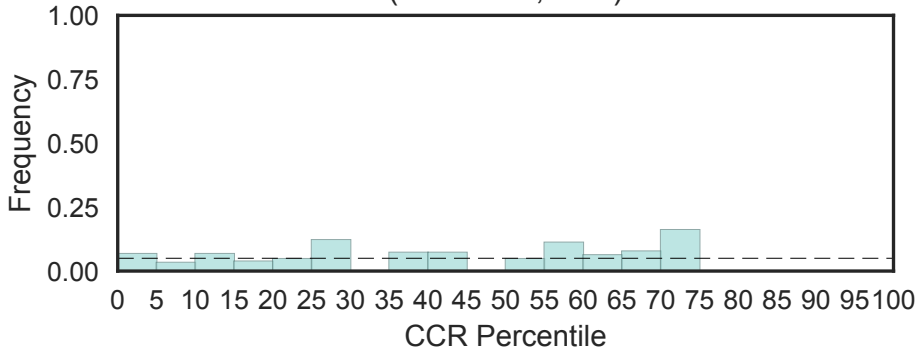

Domain of unknown function (DUF4599)  
(DUF4599, N=10)

Fisher's OR: 0; Bonferroni p-val: 1

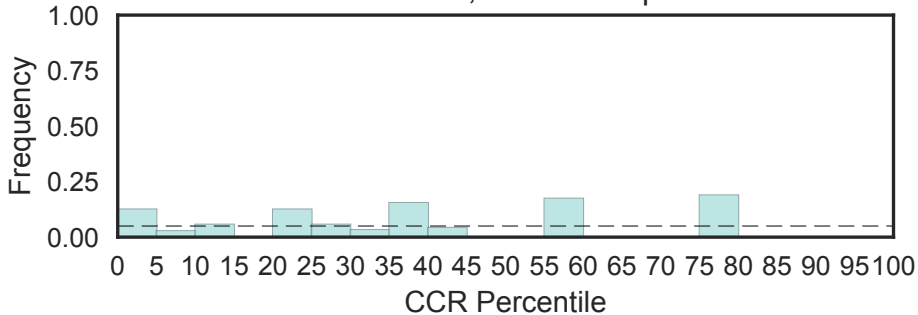

Domain of unknown function (DUF4600)  
(DUF4600, N=3)

Fisher's OR: 0; Bonferroni p-val: 1

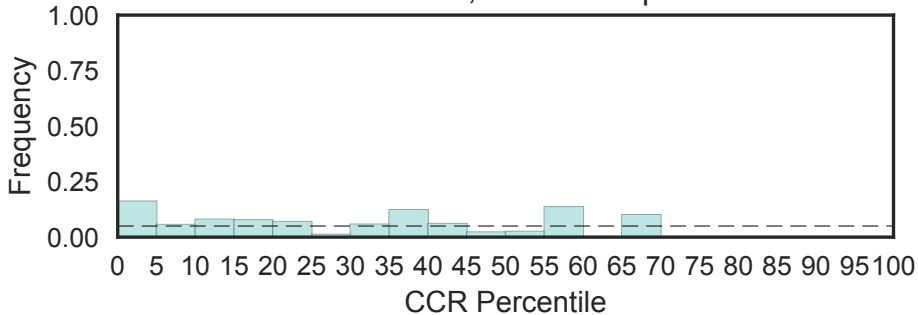

Domain of unknown function (DUF4601)  
(DUF4601, N=2)

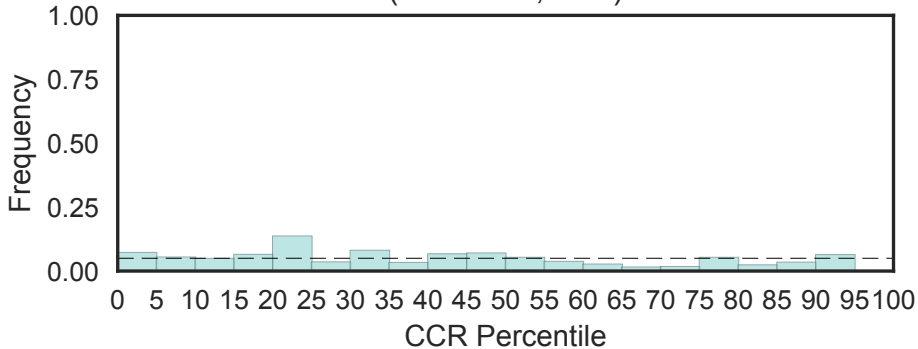



Domain of unknown function (DUF4602)  
(DUF4602, N=1)

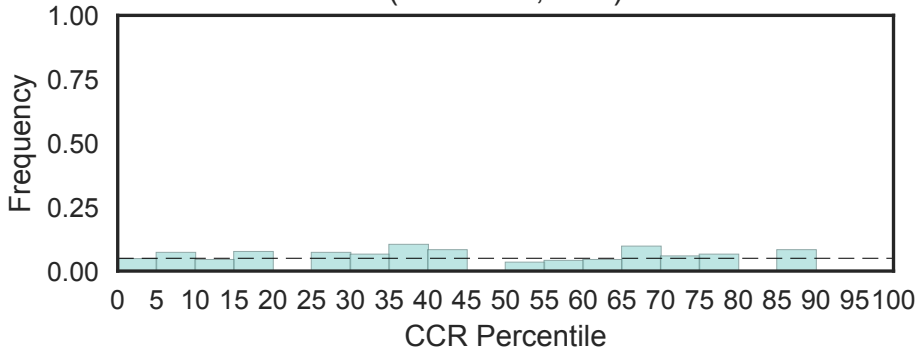

Domain of unknown function (DUF4603)  
(DUF4603, N=1)

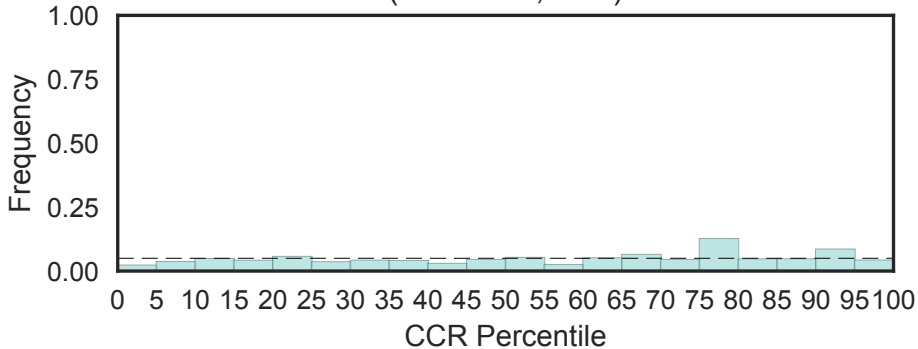

Domain of unknown function (DUF4604)  
(DUF4604, N=1)

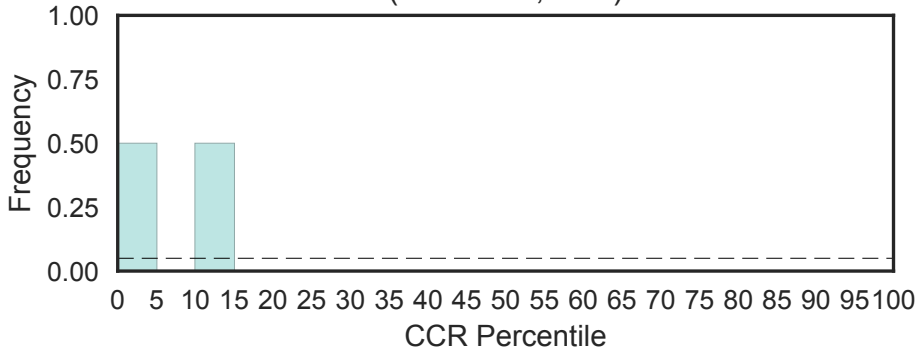

Domain of unknown function (DUF4605)  
(DUF4605, N=2)

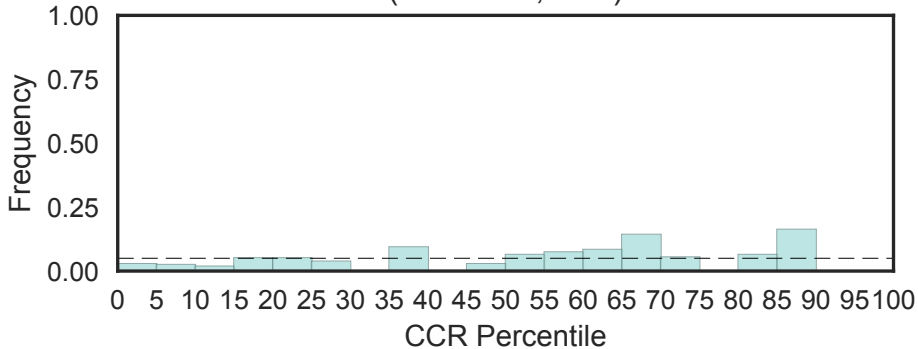

Domain of unknown function (DUF4606)  
(DUF4606, N=1)

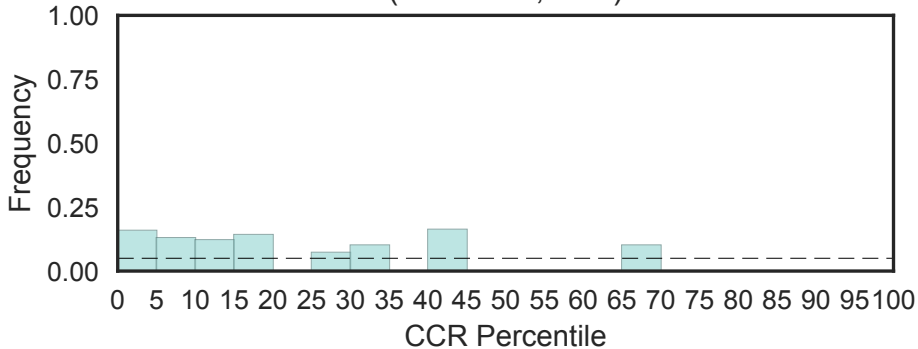

Domain of unknown function (DUF4607)  
(DUF4607, N=1)

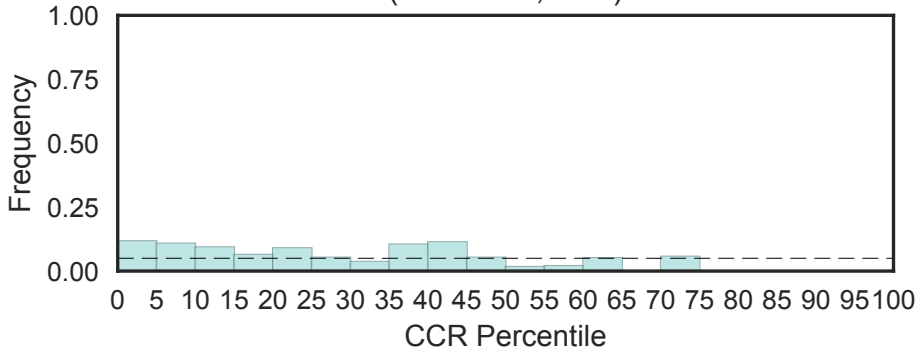

Domain of unknown function (DUF4609)  
(DUF4609, N=1)

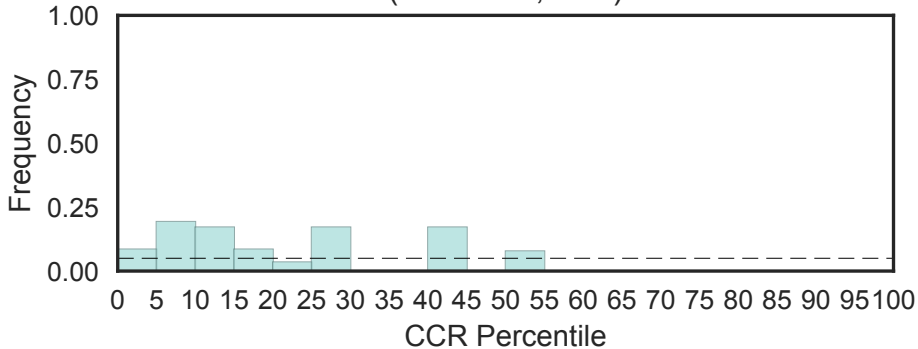

Domain of unknown function (DUF4611)  
(DUF4611, N=1)

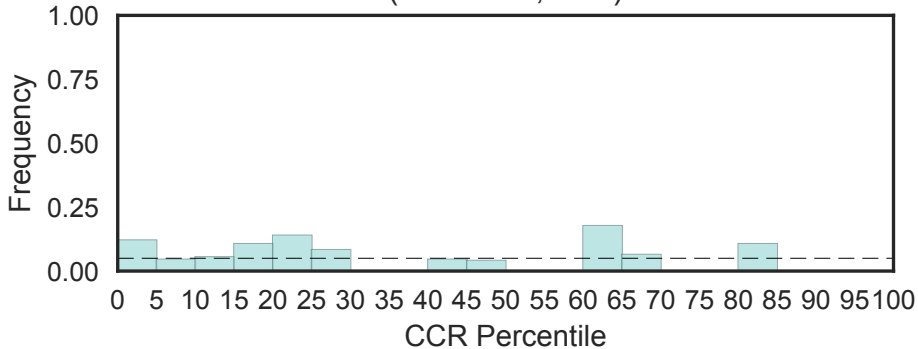



Domain of unknown function (DUF4612)  
(DUF4612, N=1)

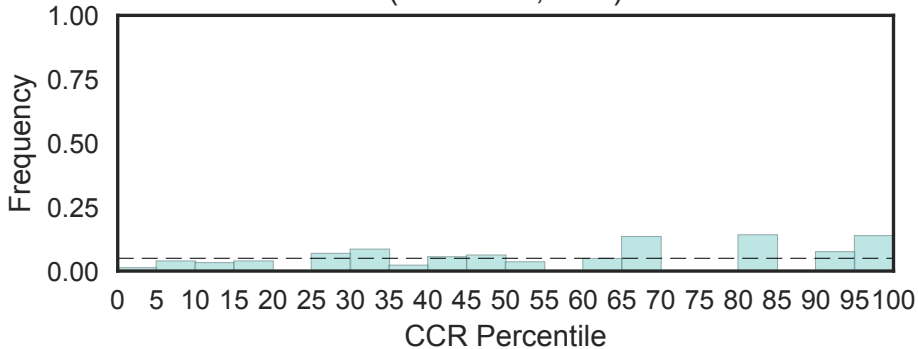

Domain of unknown function (DUF4614)  
(DUF4614, N=1)

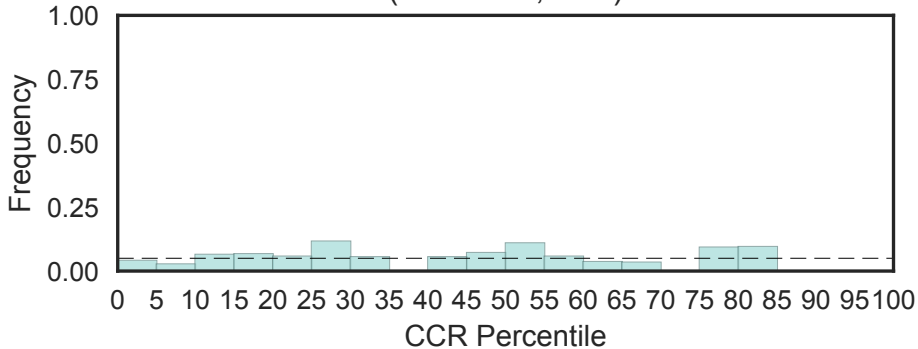

Domain of unknown function (DUF4616)  
(DUF4616, N=1)

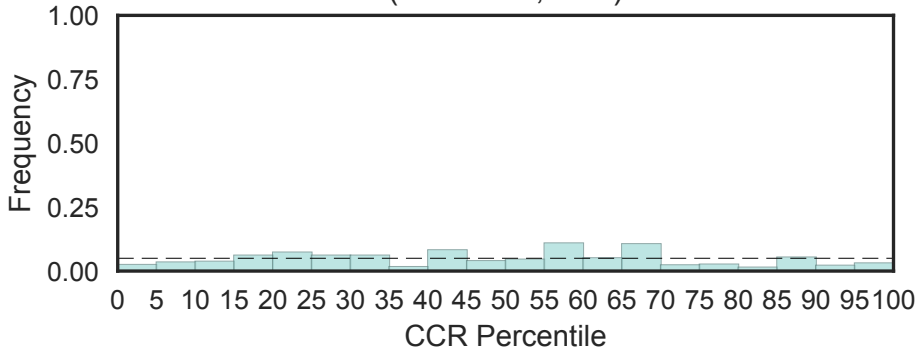

Domain of unknown function (DUF4617)  
(DUF4617, N=1)

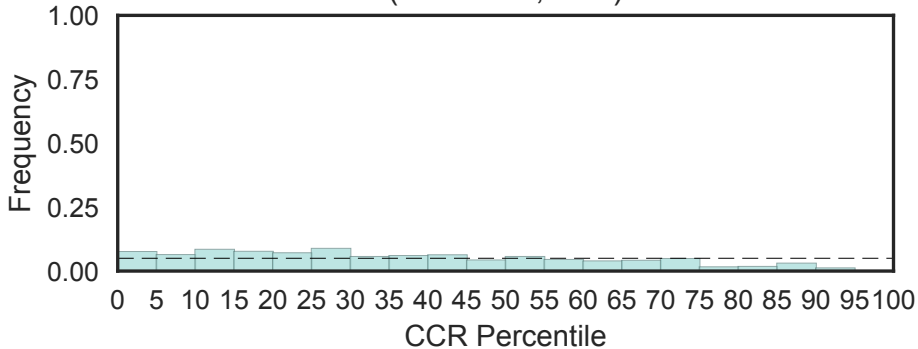

Domain of unknown function (DUF4618)  
(DUF4618, N=1)

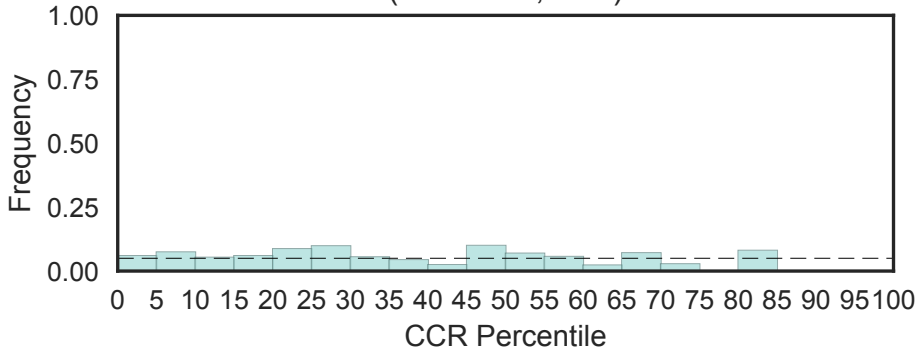

Domain of unknown function (DUF4619)  
(DUF4619, N=1)

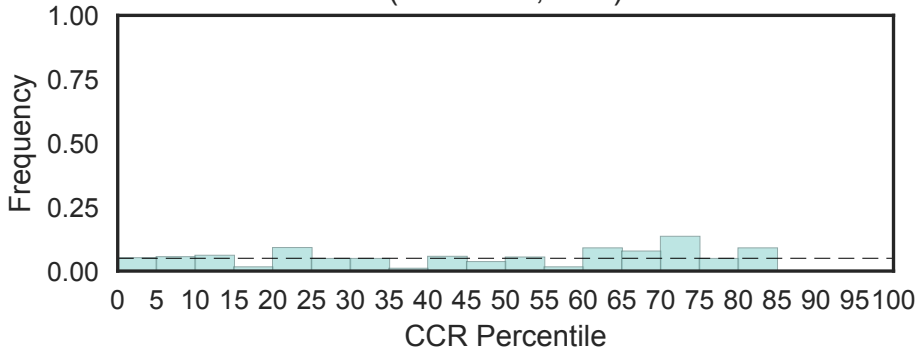

Domain of unknown function (DUF4620)  
(DUF4620, N=1)

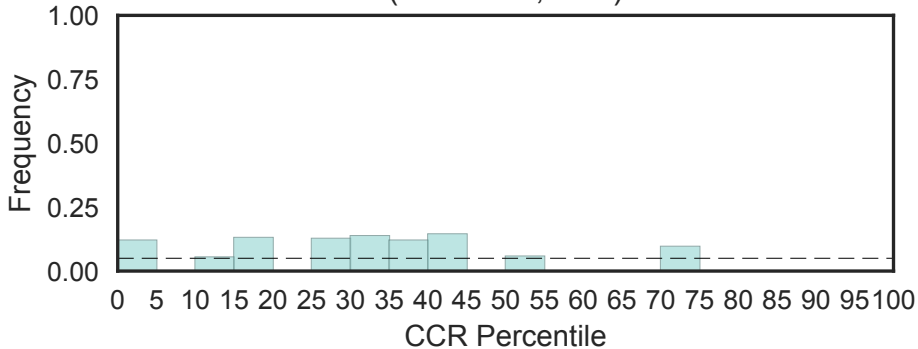

Domain of unknown function (DUF4628)  
(DUF4628, N=2)

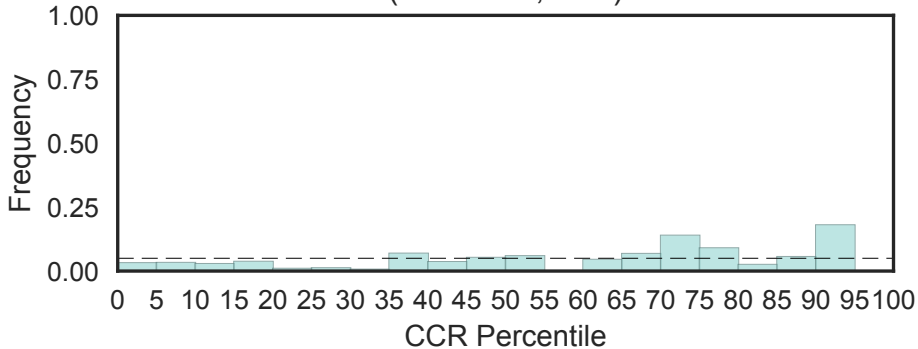



Domain of unknown function (DUF4629)  
(DUF4629, N=1)

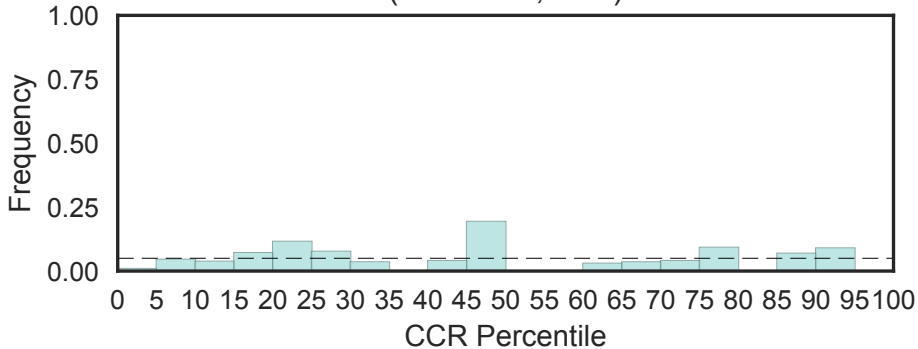

Domain of unknown function (DUF4630)  
(DUF4630, N=1)

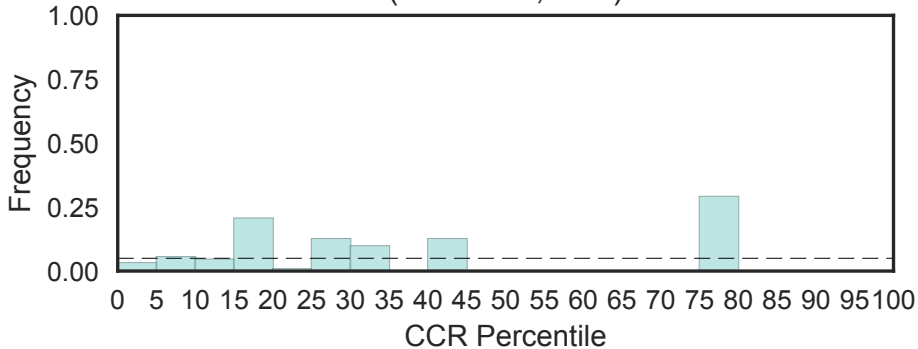

Domain of unknown function (DUF4633)  
(DUF4633, N=1)

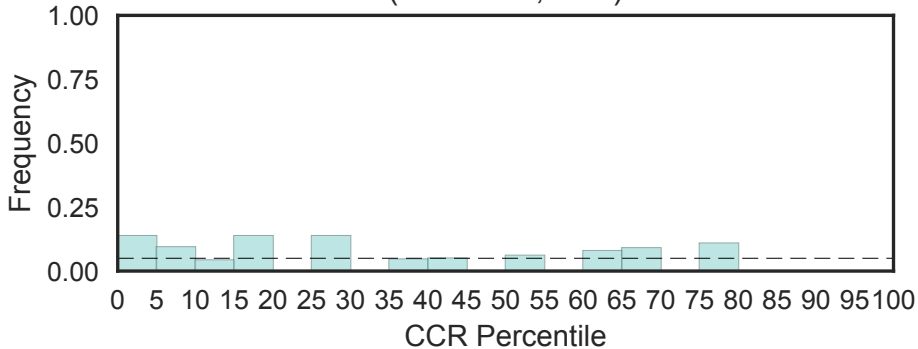

Domain of unknown function (DUF4634)  
(DUF4634, N=1)

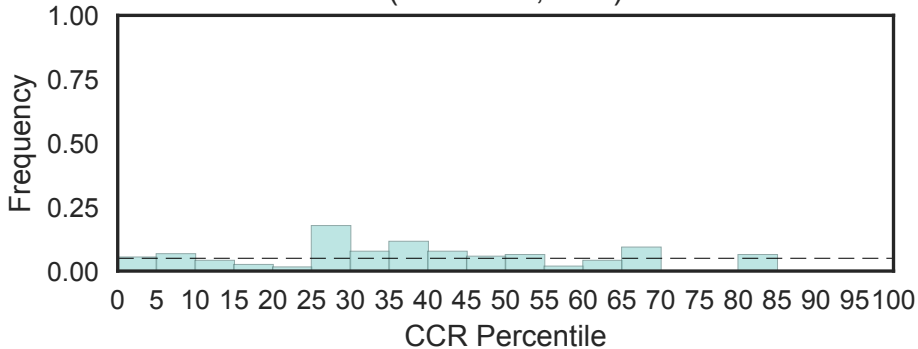

Domain of unknown function (DUF4636)  
(DUF4636, N=1)

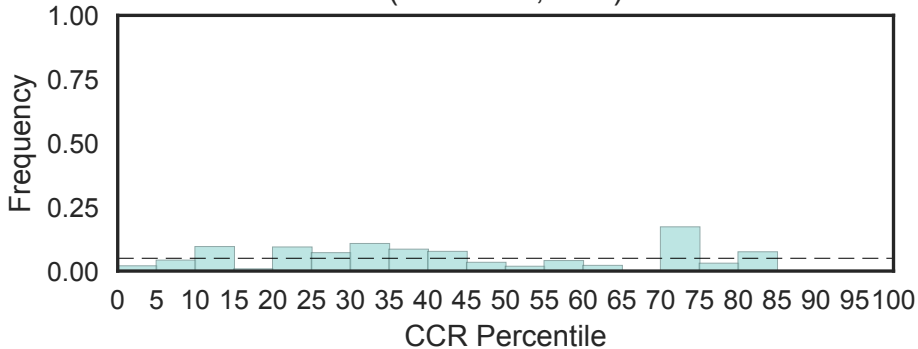

Domain of unknown function (DUF4637)  
(DUF4637, N=1)

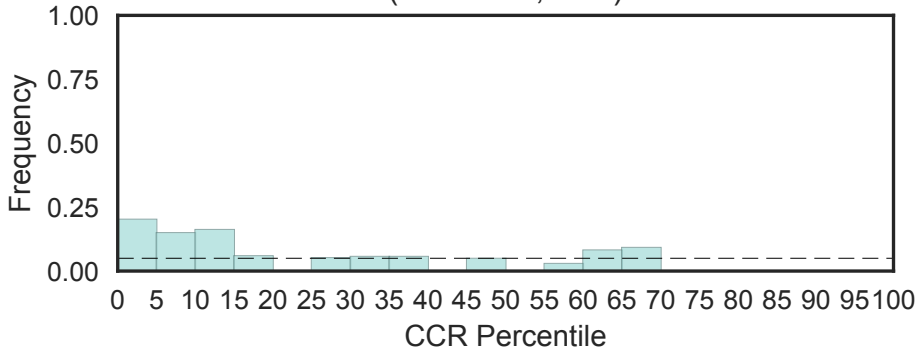

Domain of unknown function (DUF4638)  
(DUF4638, N=1)

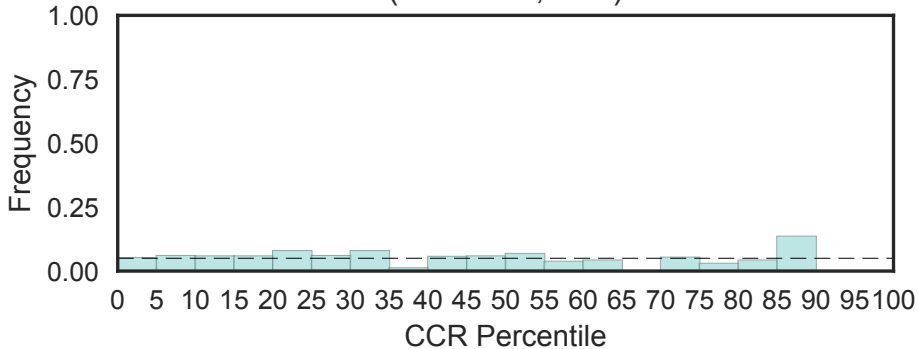

Domain of unknown function (DUF4639)  
(DUF4639, N=1)

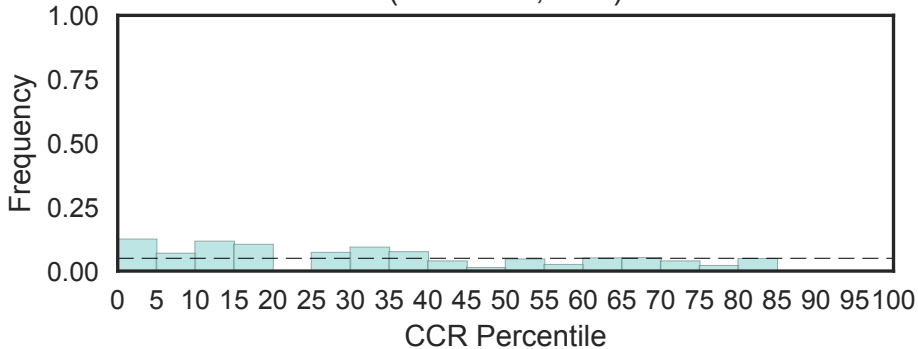



Domain of unknown function (DUF4642)  
(DUF4642, N=1)

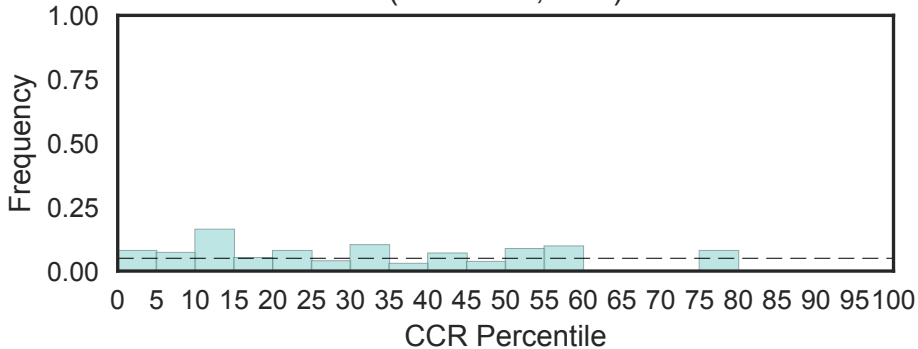

Domain of unknown function (DUF4644)  
(DUF4644, N=1)

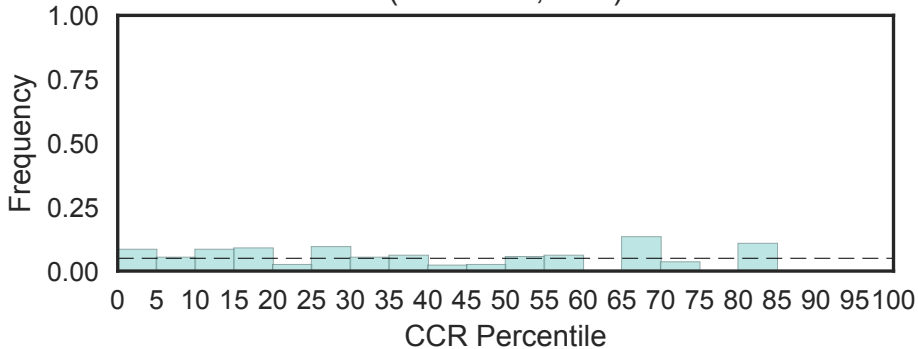

Domain of unknown function (DUF4647)  
(DUF4647, N=1)

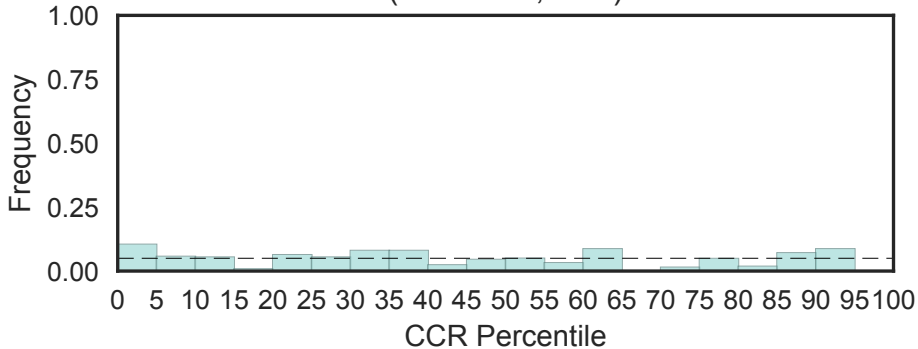

Domain of unknown function (DUF4648)  
(DUF4648, N=1)

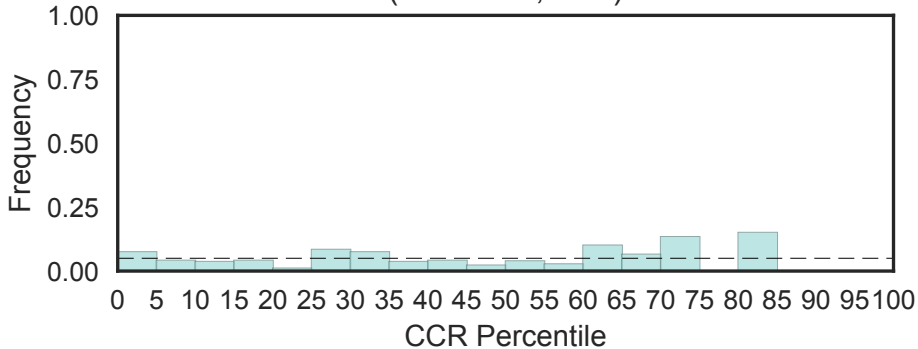

Domain of unknown function (DUF4650)  
(DUF4650, N=1)

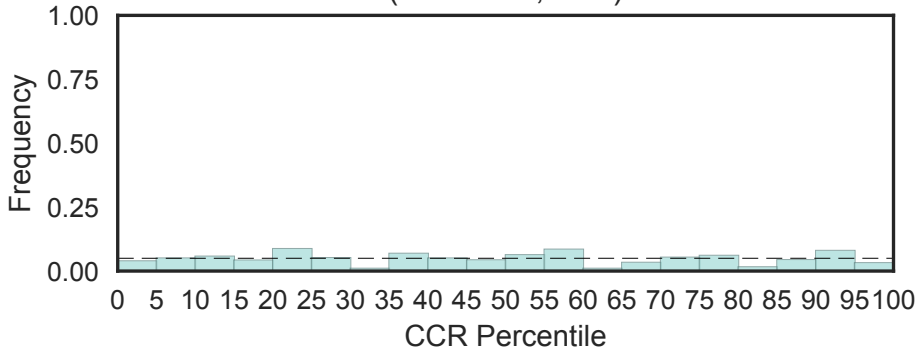

Domain of unknown function (DUF4653)  
(DUF4653, N=1)

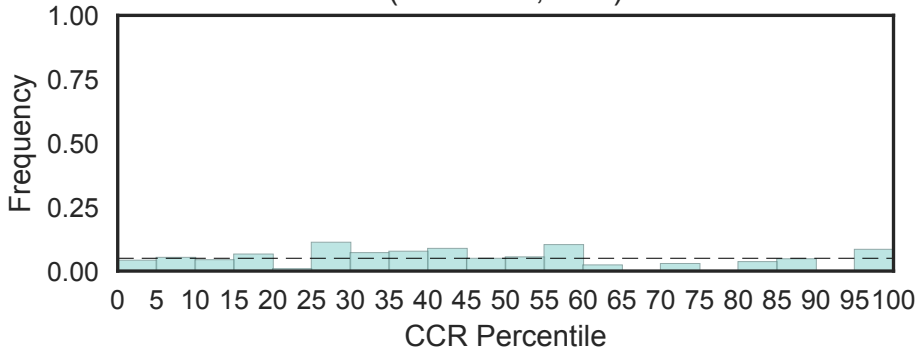

Domain of unknown function (DUF4654)  
(DUF4654, N=1)

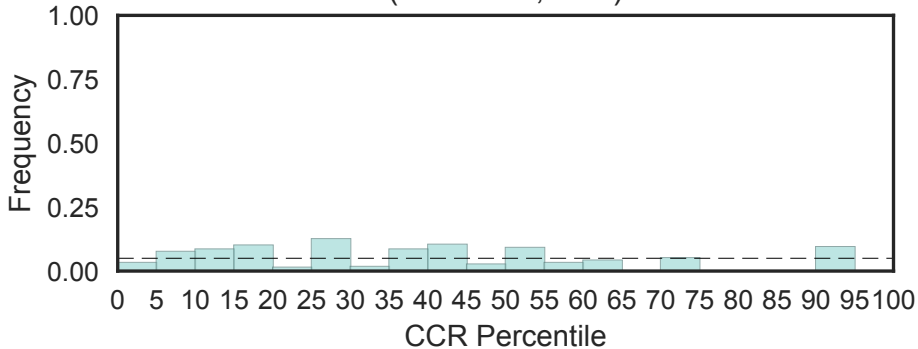

Domain of unknown function (DUF4655)  
(DUF4655, N=1)

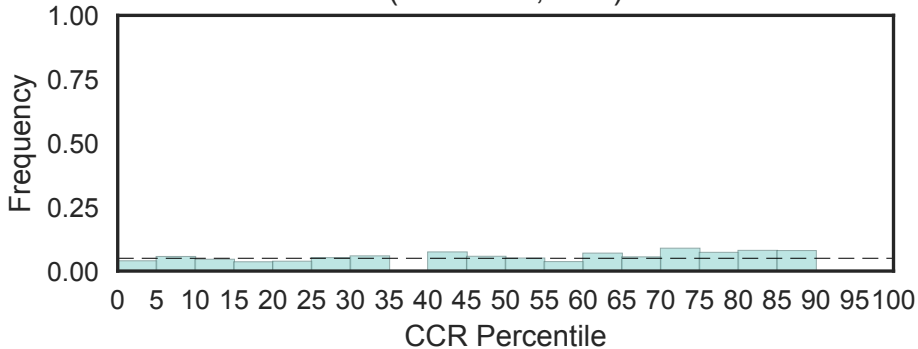



Domain of unknown function (DUF4656)  
(DUF4656, N=1)

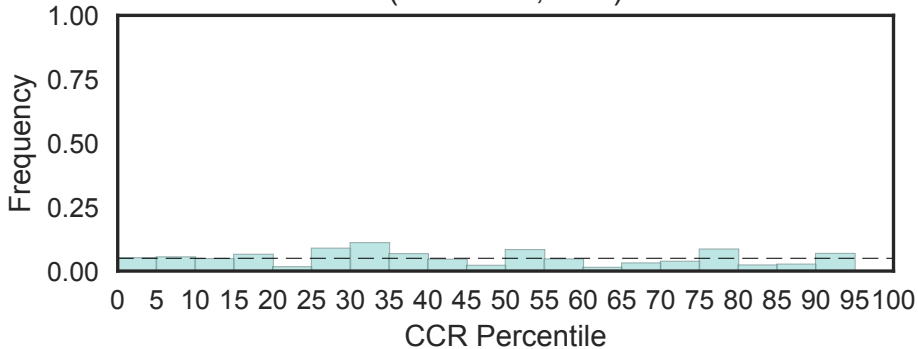

Domain of unknown function (DUF4657)  
(DUF4657, N=2)

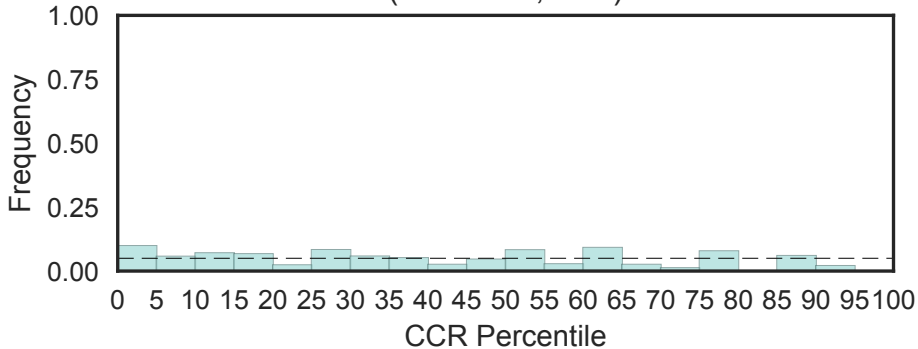

Domain of unknown function (DUF4658)  
(DUF4658, N=1)

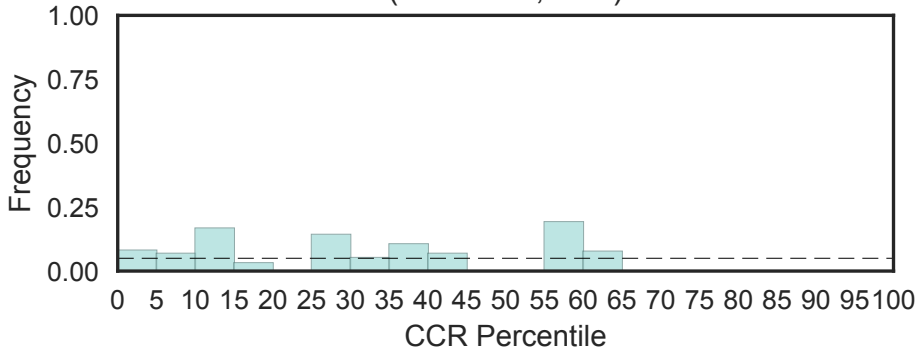

Domain of unknown function (DUF4659)  
(DUF4659, N=2)

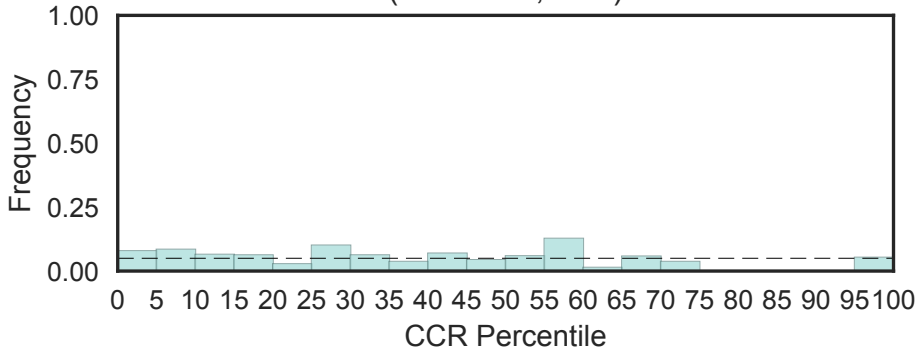

Domain of unknown function (DUF4660)  
(DUF4660, N=1)

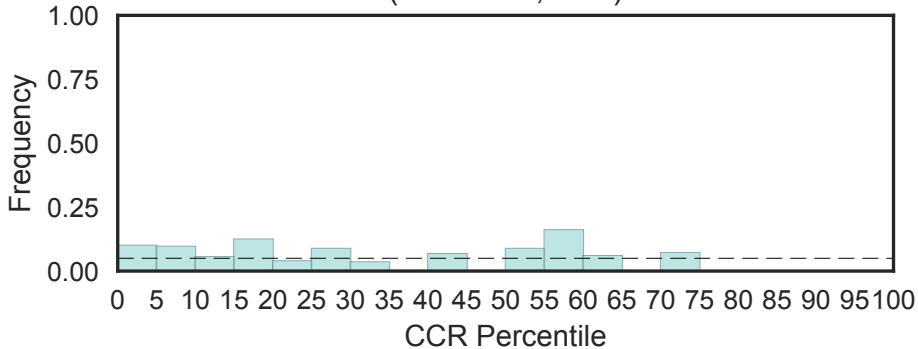

Domain of unknown function (DUF4662)  
(DUF4662, N=1)

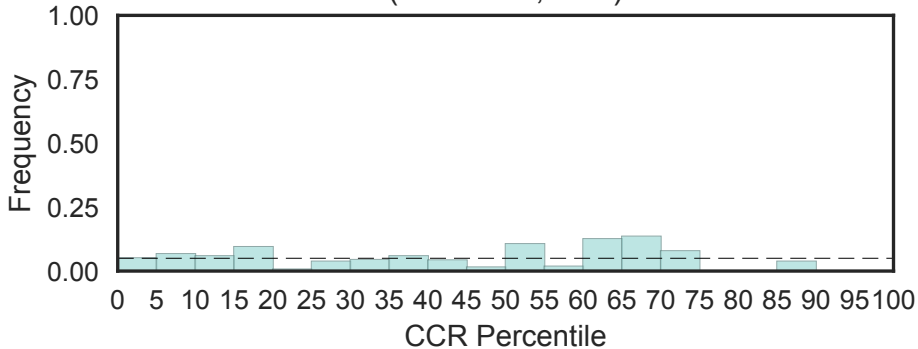

Domain of unknown function (DUF4663)  
(DUF4663, N=1)

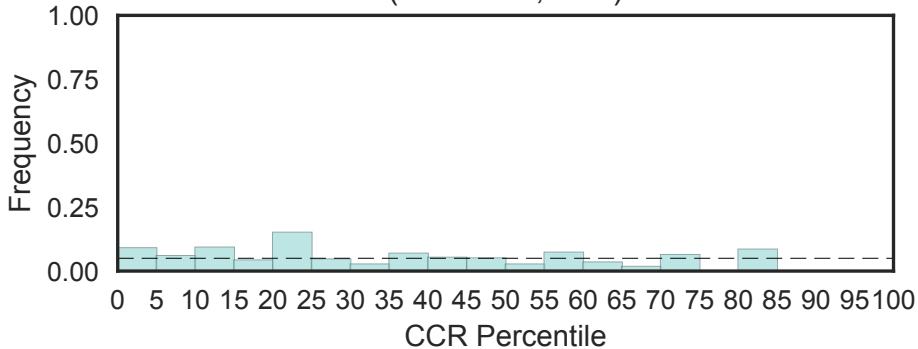

Domain of unknown function (DUF4665)  
(DUF4665, N=1)

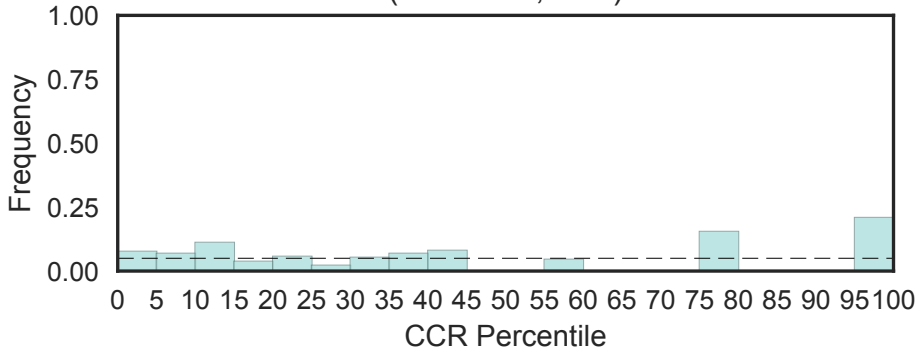



Domain of unknown function (DUF4670)  
(DUF4670, N=1)

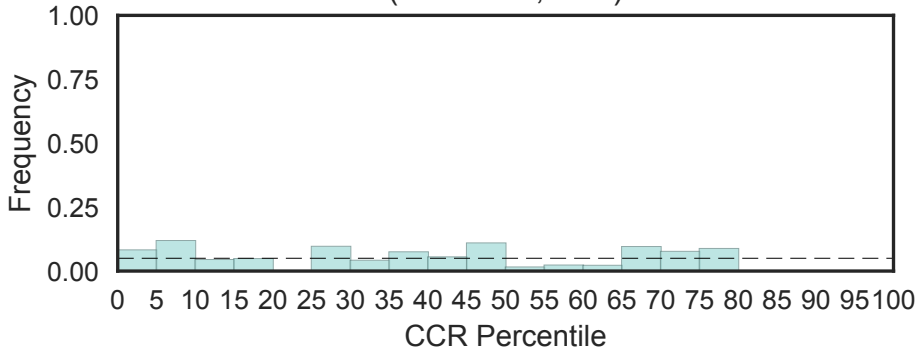

Domain of unknown function (DUF4671)  
(DUF4671, N=1)

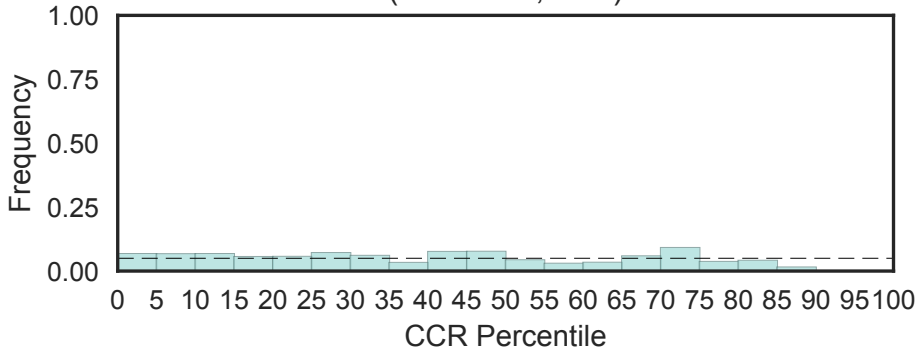

Domain of unknown function (DUF4672)  
(DUF4672, N=1)

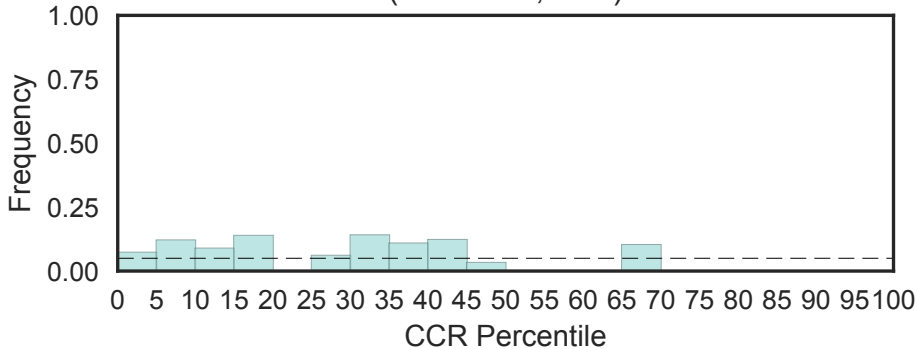

Domain of unknown function (DUF4674)  
(DUF4674, N=1)

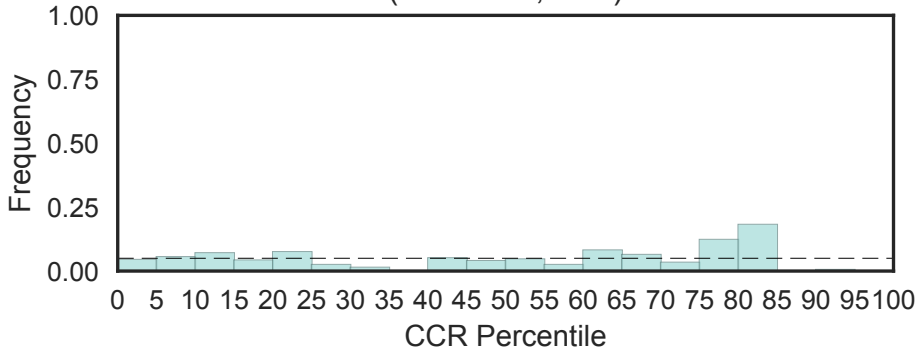

Domain of unknown function (DUF4675)  
(DUF4675, N=1)

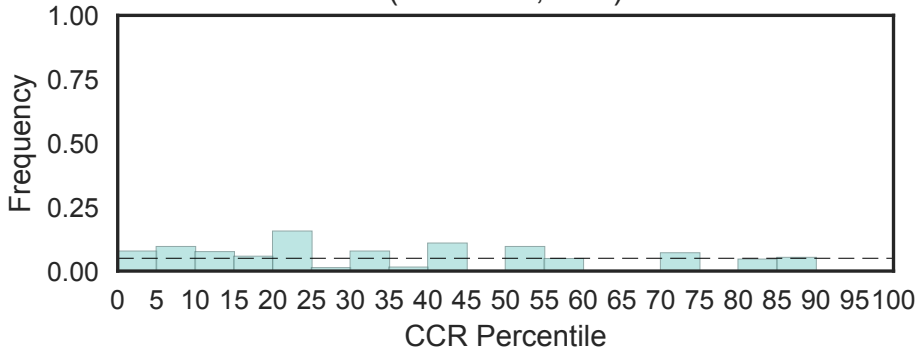

Domain of unknown function (DUF4677)  
(DUF4677, N=1)

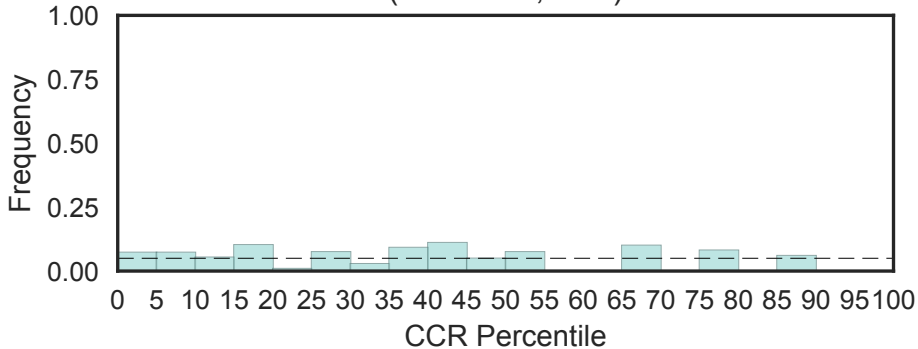

Domain of unknown function (DUF4678)  
(DUF4678, N=1)

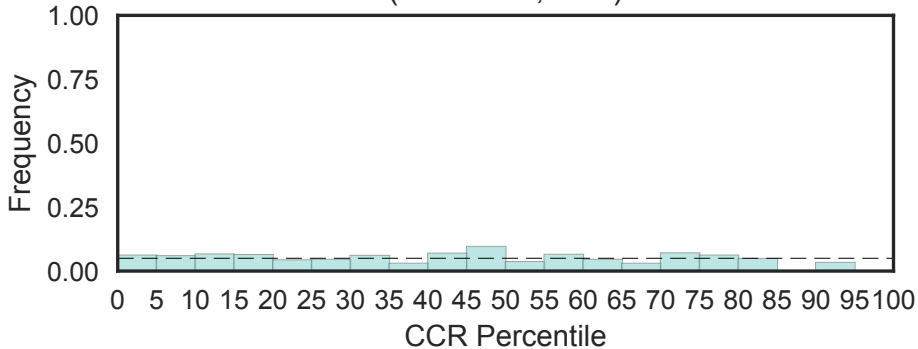

Domain of unknown function (DUF4679)  
(DUF4679, N=1)

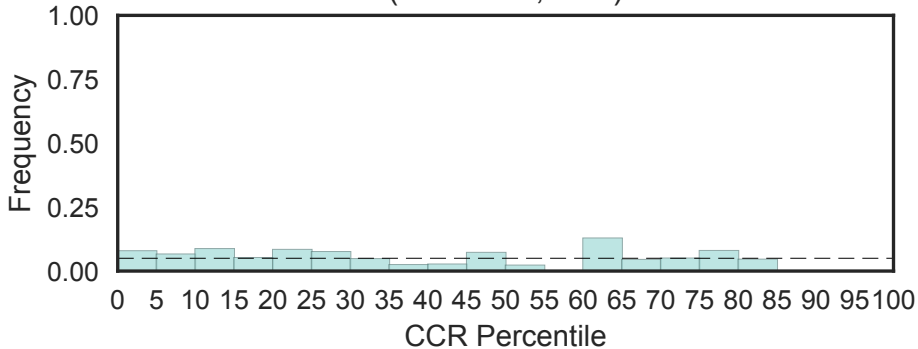



Domain of unknown function (DUF4680)  
(DUF4680, N=1)

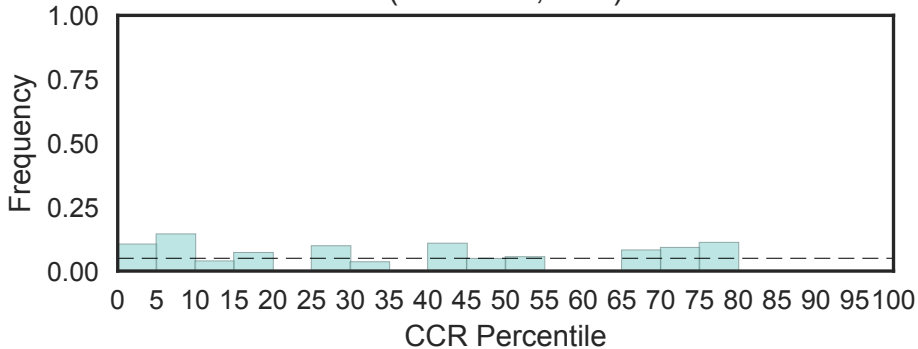

Domain of unknown function (DUF4681)  
(DUF4681, N=1)

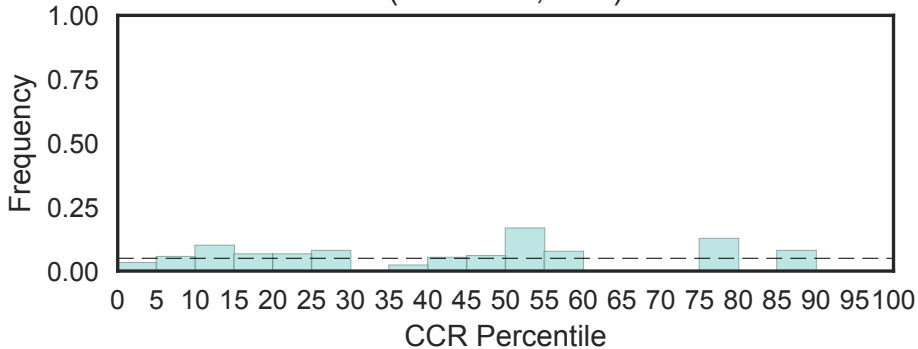

Domain of unknown function (DUF4682)  
(DUF4682, N=2)

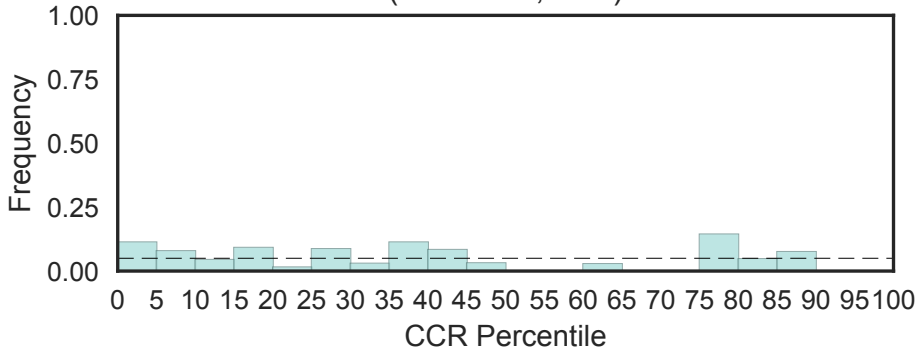

Domain of unknown function (DUF4683)  
(DUF4683, N=2)

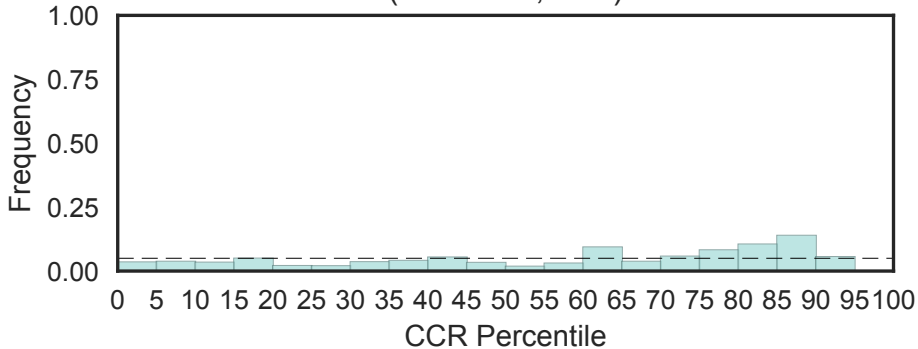

Domain of unknown function (DUF4684)  
(DUF4684, N=1)

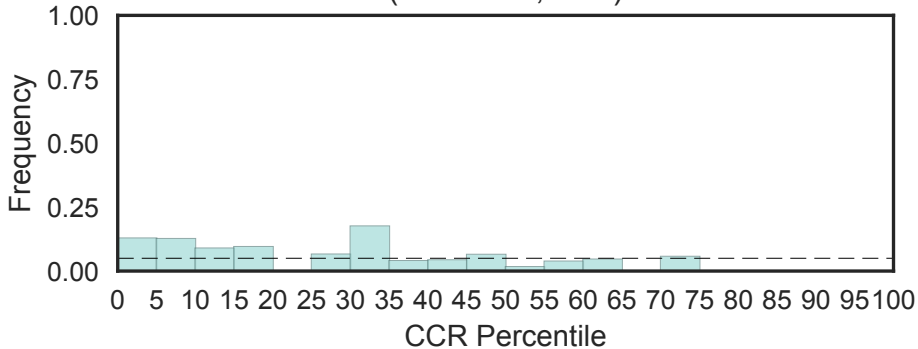

Domain of unknown function (DUF4685)  
(DUF4685, N=2)

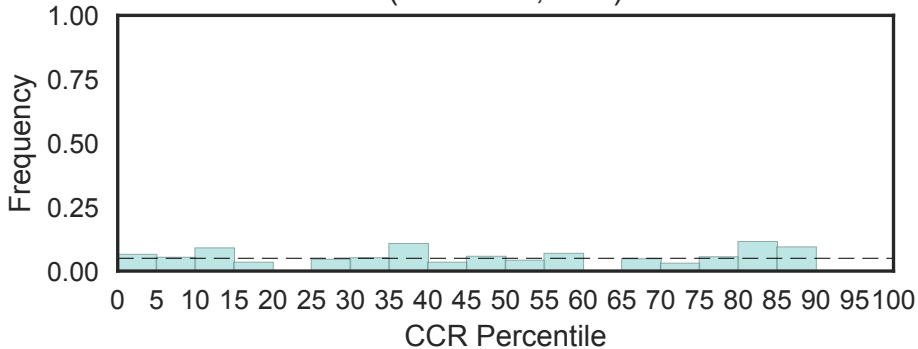

Domain of unknown function (DUF4686)  
(DUF4686, N=1)

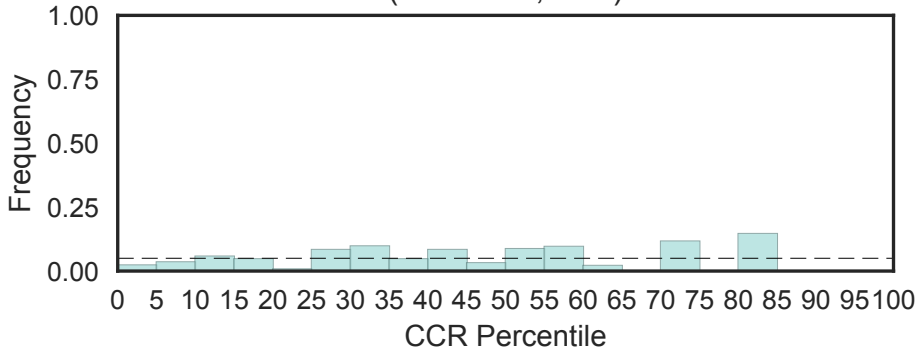

Domain of unknown function (DUF4687)  
(DUF4687, N=1)

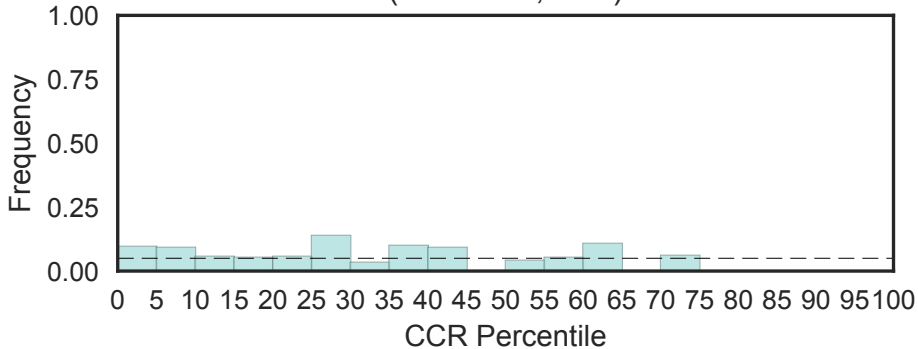



Domain of unknown function (DUF4688)  
(DUF4688, N=1)

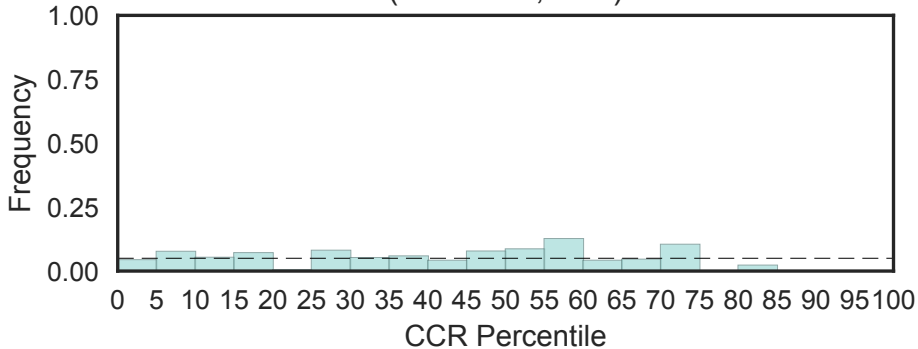

Domain of unknown function (DUF4689)  
(DUF4689, N=1)

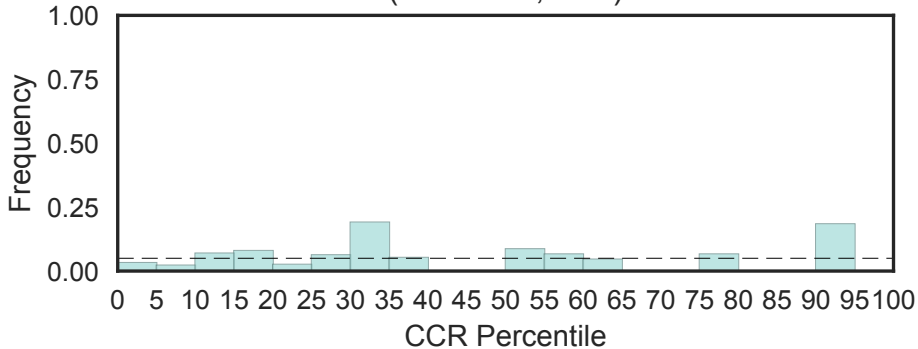

Domain of unknown function (DUF4690)  
(DUF4690, N=1)

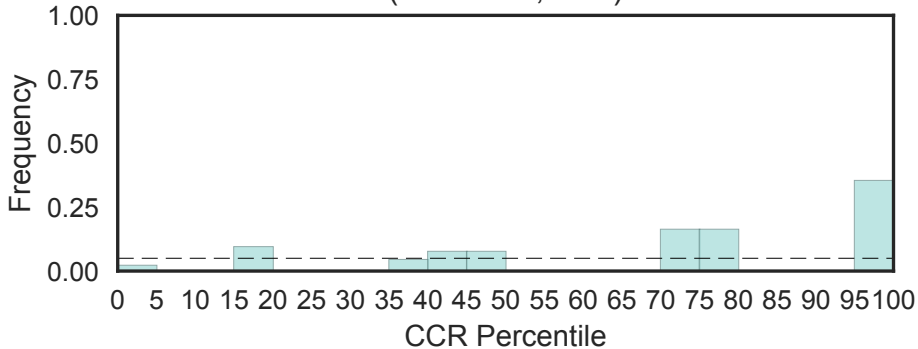

Domain of unknown function (DUF4691)  
(DUF4691, N=1)

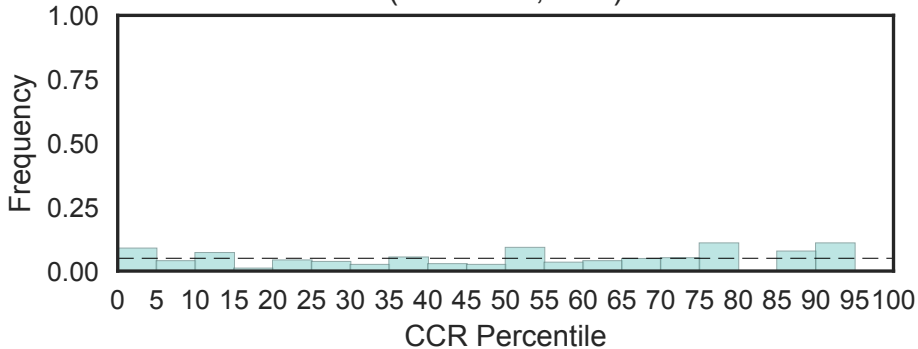

Domain of unknown function (DUF4692)  
(DUF4692, N=1)

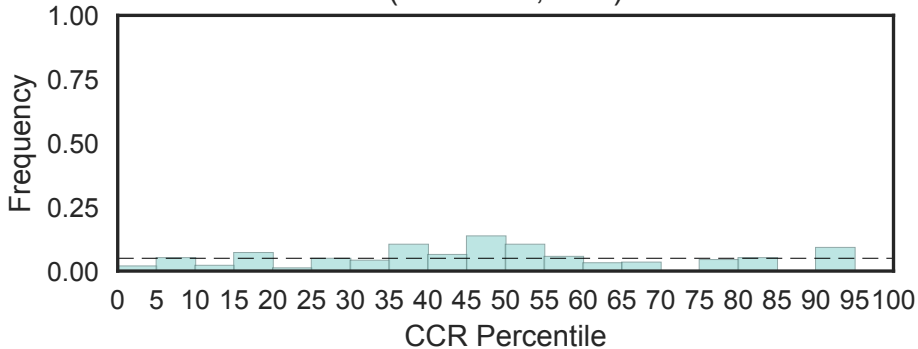

Domain of unknown function (DUF4693)  
(DUF4693, N=1)

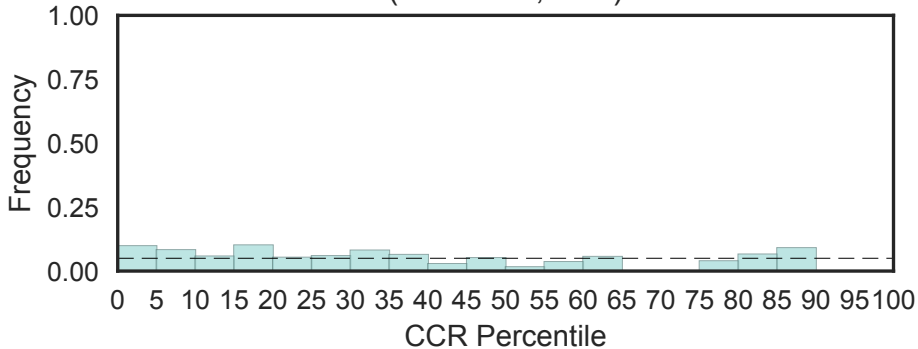

Domain of unknown function (DUF4695)  
(DUF4695, N=1)

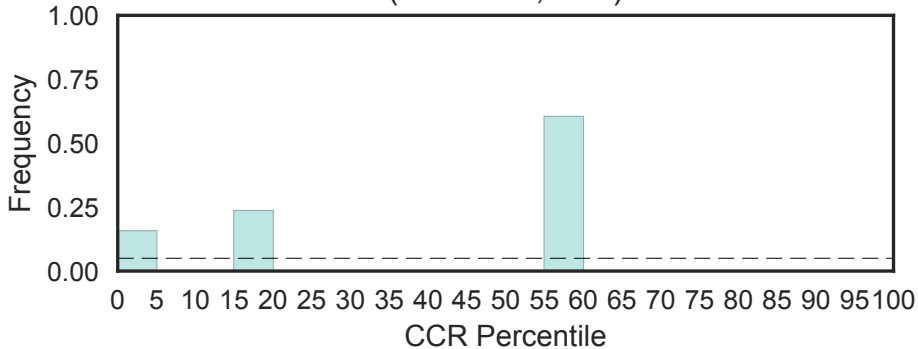

Domain of unknown function (DUF4696)  
(DUF4696, N=1)

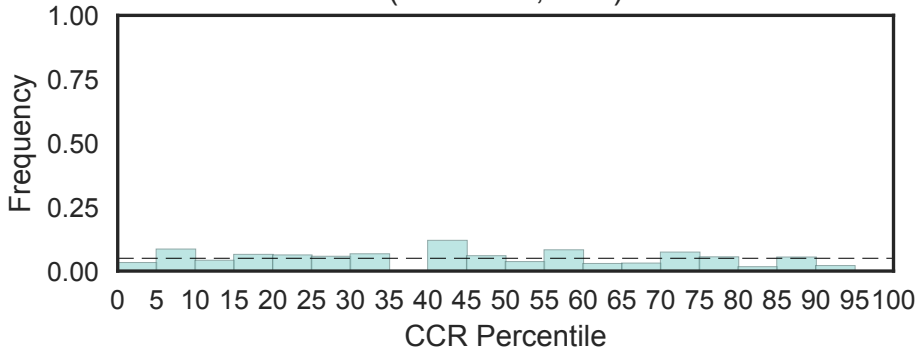



Domain of unknown function (DUF4698)  
(DUF4698, N=1)

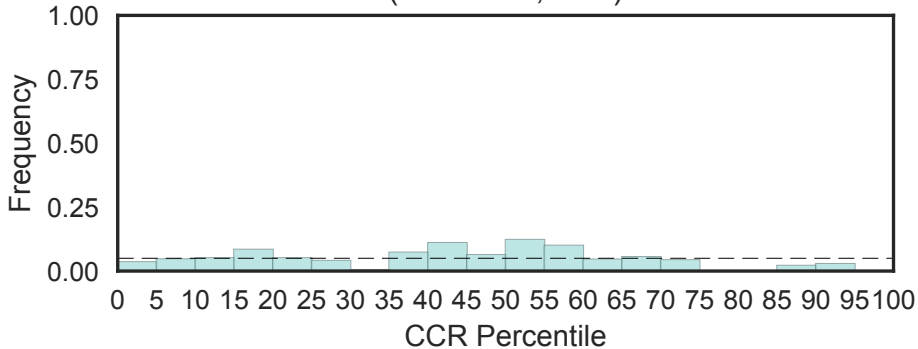

Domain of unknown function (DUF4699)  
(DUF4699, N=1)

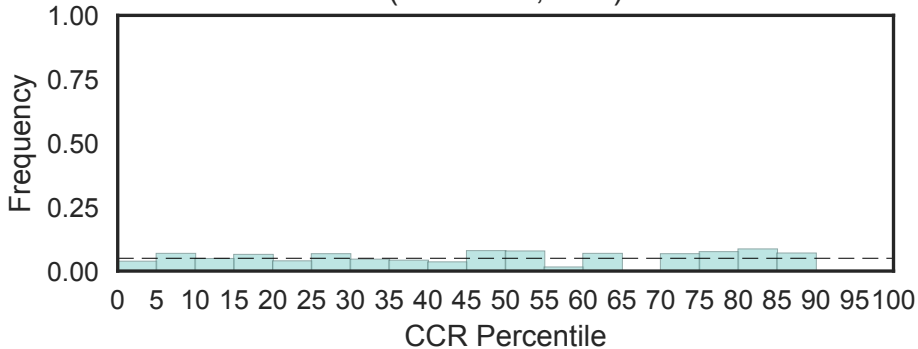

Domain of unknown function (DUF4701)  
(DUF4701, N=1)

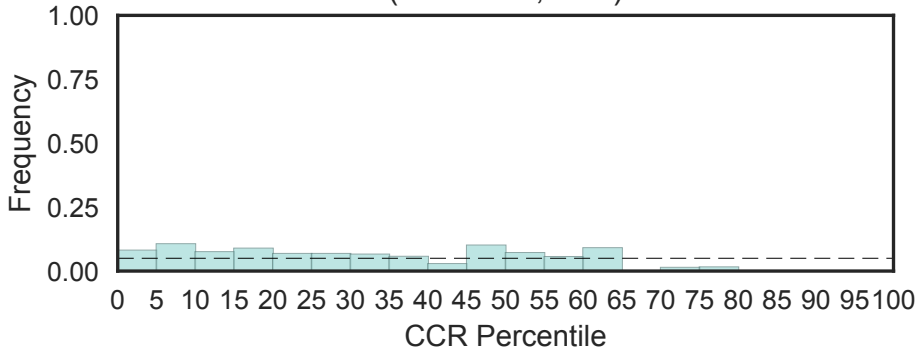

Domain of unknown function (DUF4702)  
(DUF4702, N=1)

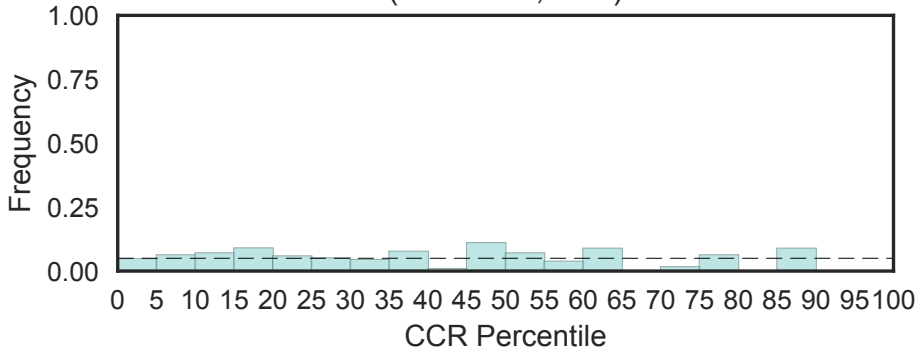

Domain of unknown function (DUF4703)  
(DUF4703, N=1)

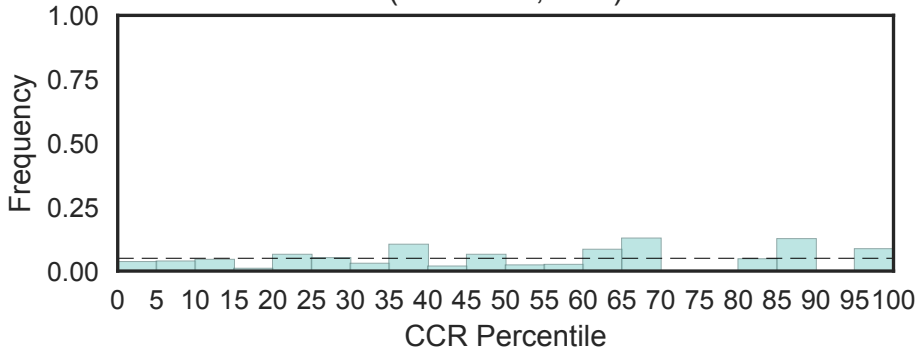

Domain of unknown function (DUF4704)  
(DUF4704, N=5)

Fisher's OR: 0.835; Bonferroni p-val: 1

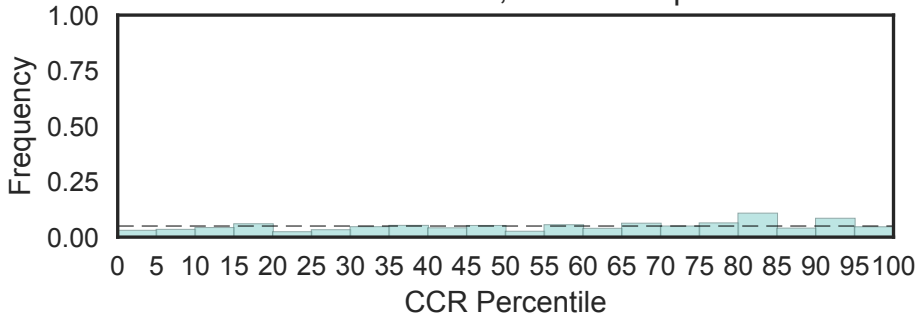

Domain of unknown function (DUF4705)  
(DUF4705, N=5)

Fisher's OR: 0; Bonferroni p-val: 1

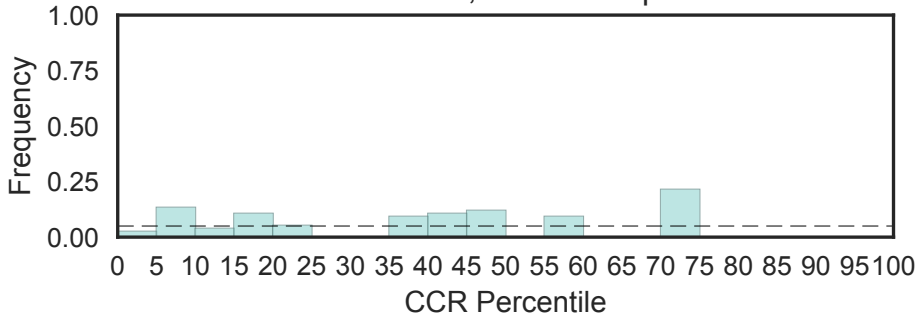

Domain of unknown function (DUF4706)  
(DUF4706, N=1)

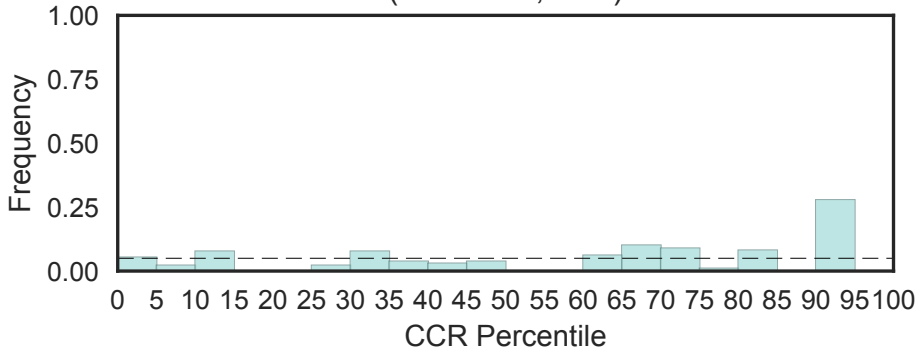



Domain of unknown function (DUF4707)  
(DUF4707, N=1)

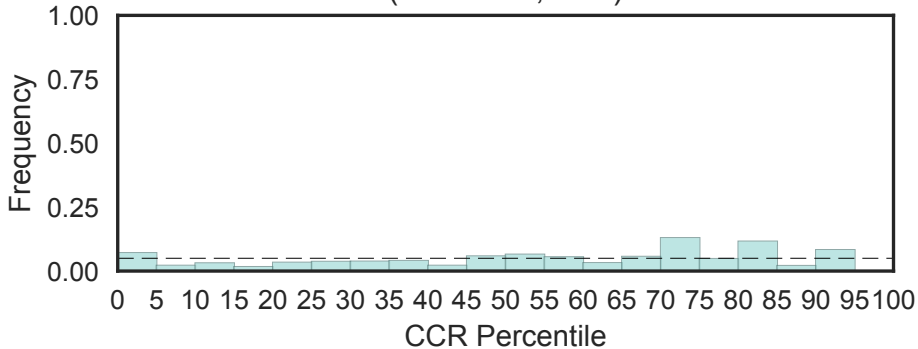

Domain of unknown function (DUF4708)  
(DUF4708, N=1)

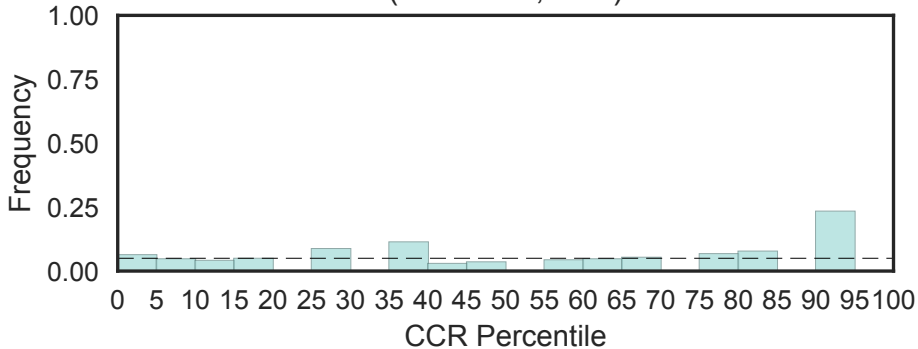

Domain of unknown function (DUF4709)  
(DUF4709, N=1)

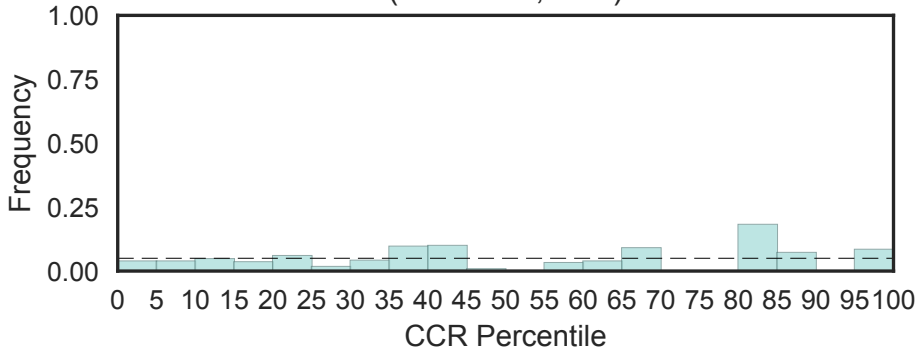

Domain of unknown function (DUF4710)  
(DUF4710, N=1)

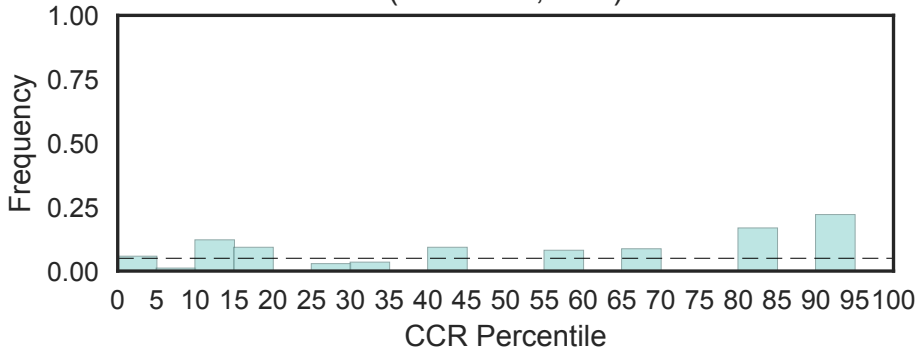

Domain of unknown function (DUF4711)  
(DUF4711, N=1)

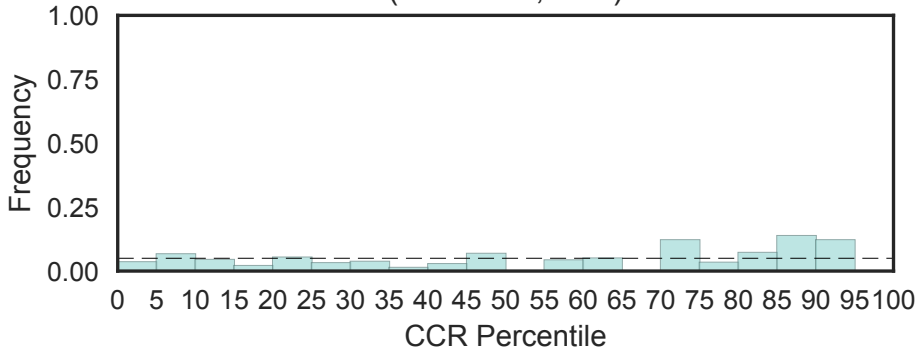

Domain of unknown function (DUF4712)  
(DUF4712, N=1)

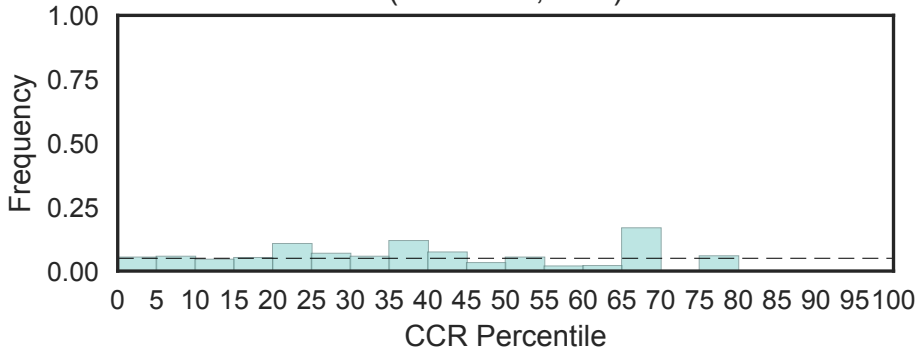

Domain of unknown function (DUF4713)  
(DUF4713, N=3)

Fisher's OR: 0; Bonferroni p-val: 1

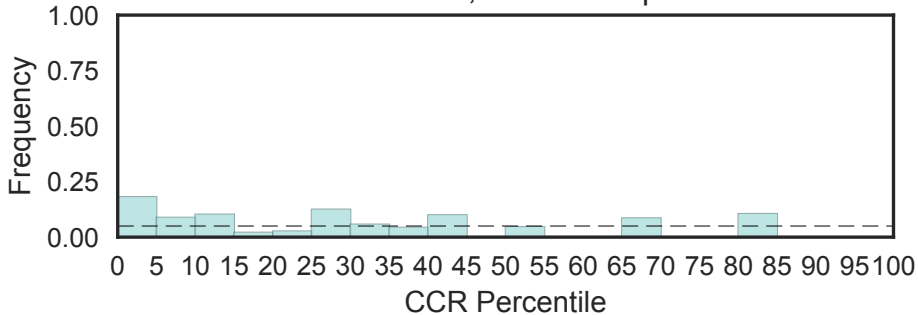

Domain of unknown function (DUF4714)  
(DUF4714, N=1)

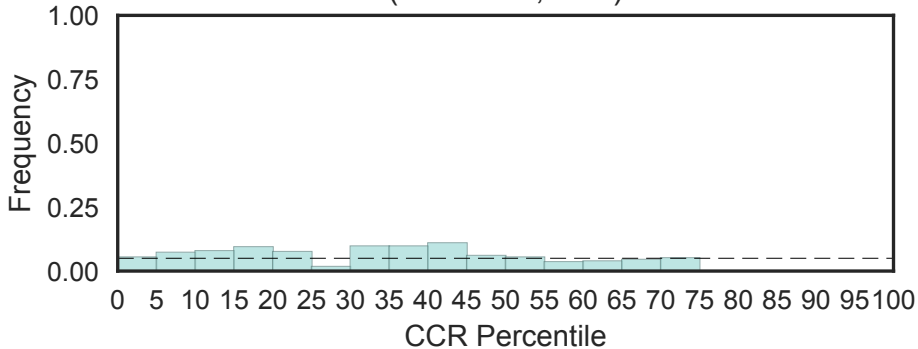



Domain of unknown function (DUF4717)  
(DUF4717, N=1)

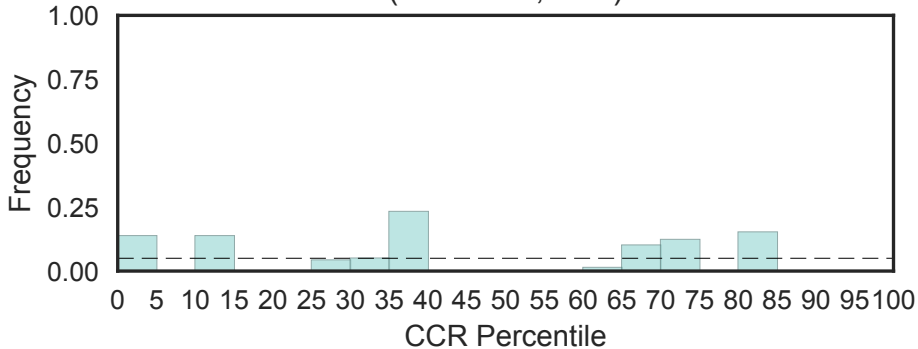

Domain of unknown function (DUF4718)  
(DUF4718, N=1)

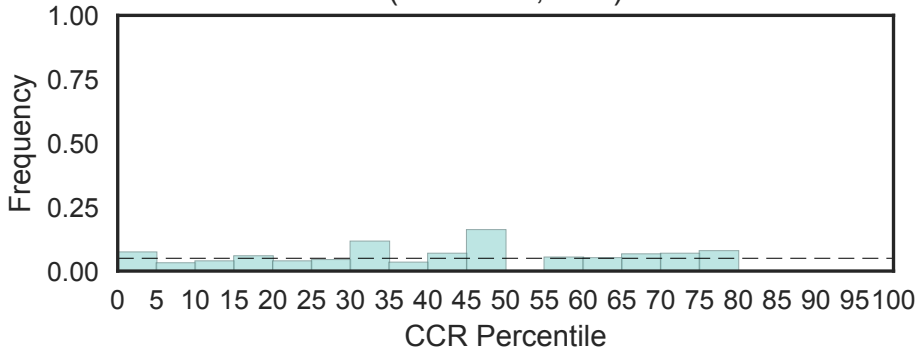

Domain of unknown function (DUF4719)  
(DUF4719, N=1)

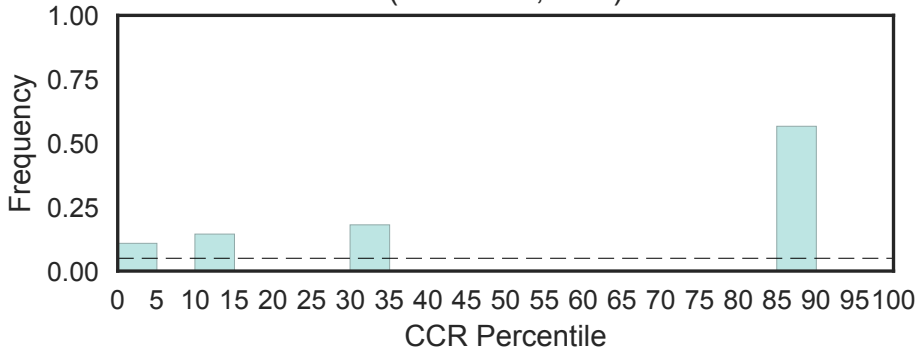

Domain of unknown function (DUF4720)  
(DUF4720, N=1)

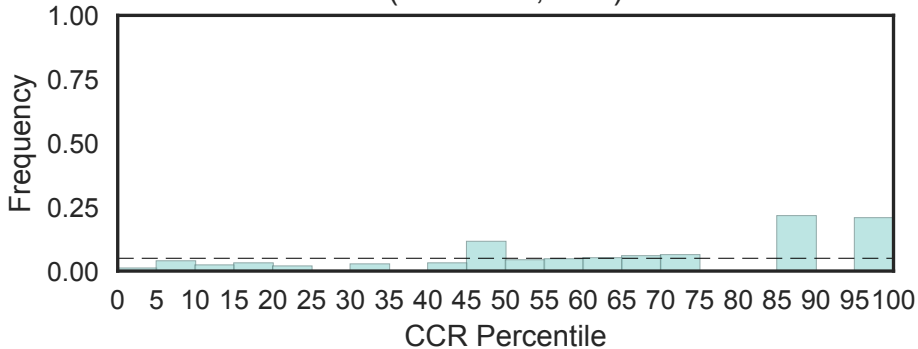

Domain of unknown function (DUF4721)  
(DUF4721, N=1)

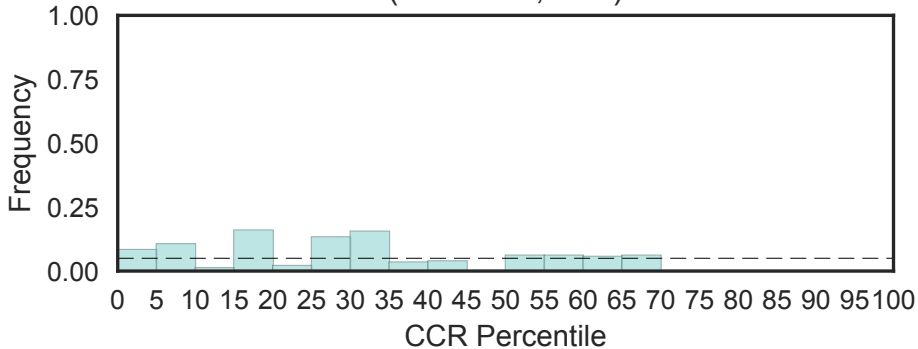

Domain of unknown function (DUF4722)  
(DUF4722, N=1)

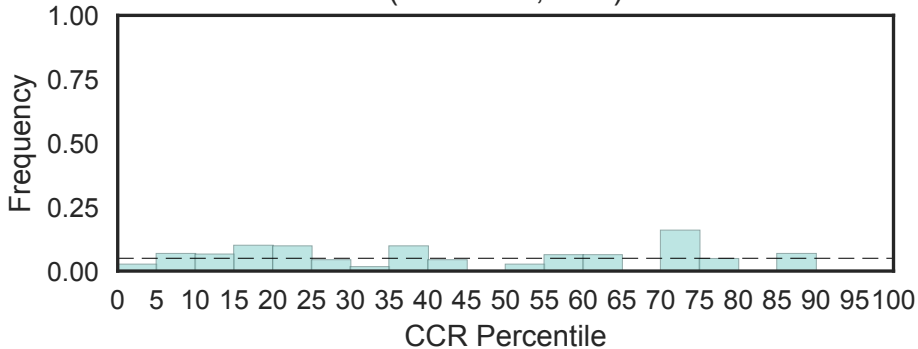

Domain of unknown function (DUF4723)  
(DUF4723, N=1)

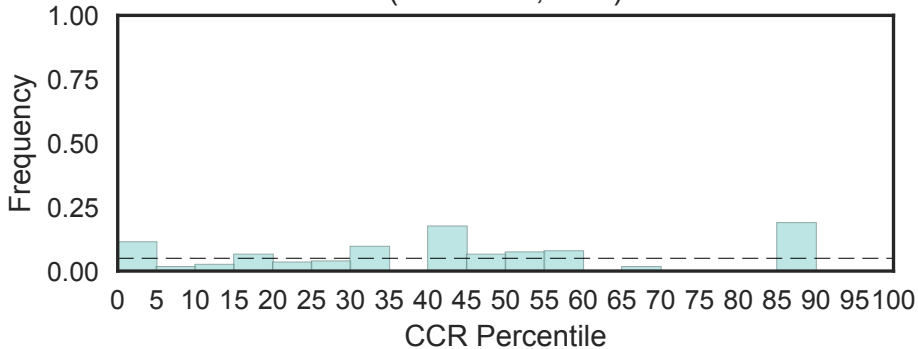

Domain of unknown function (DUF4725)  
(DUF4725, N=1)

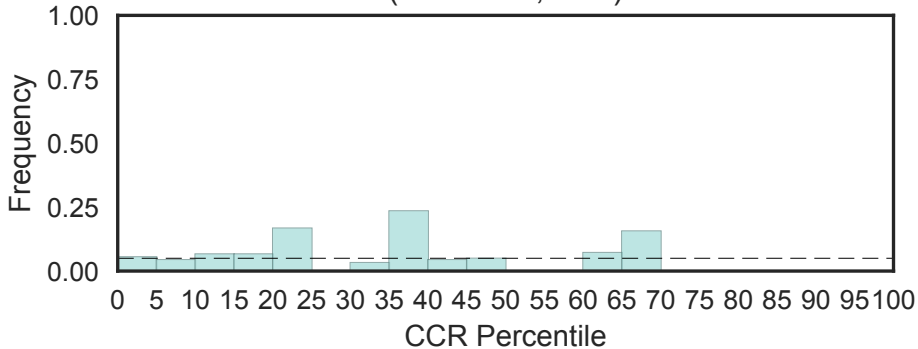



Domain of unknown function (DUF4726)  
(DUF4726, N=1)

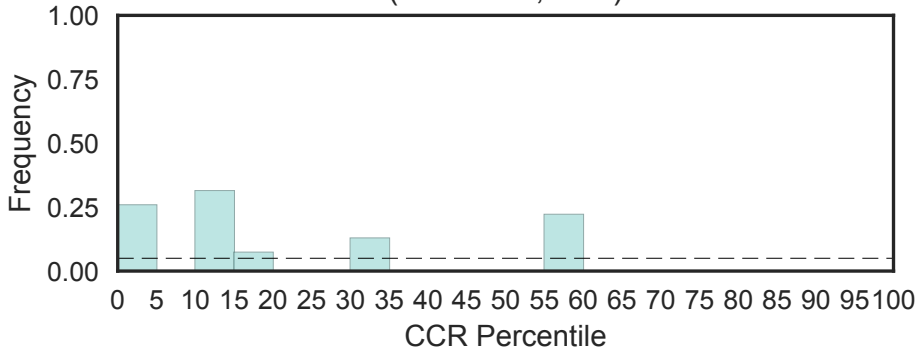

Domain of unknown function (DUF4727)  
(DUF4727, N=1)

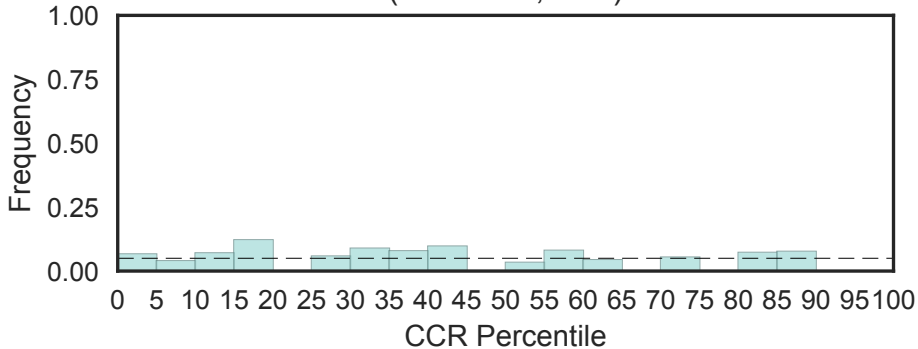

Domain of unknown function (DUF4731)  
(DUF4731, N=1)

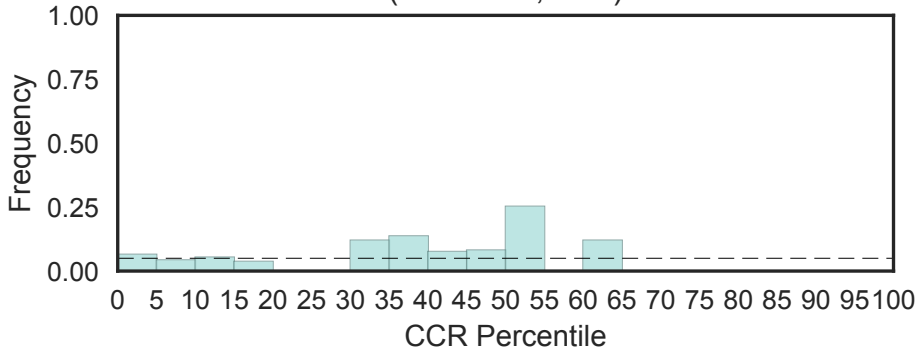

Domain of unknown function (DUF4732)  
(DUF4732, N=1)

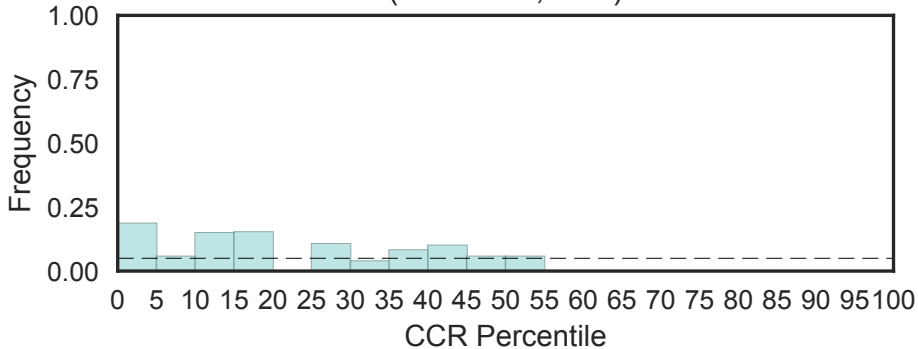

Domain of unknown function (DUF4733)  
(DUF4733, N=1)

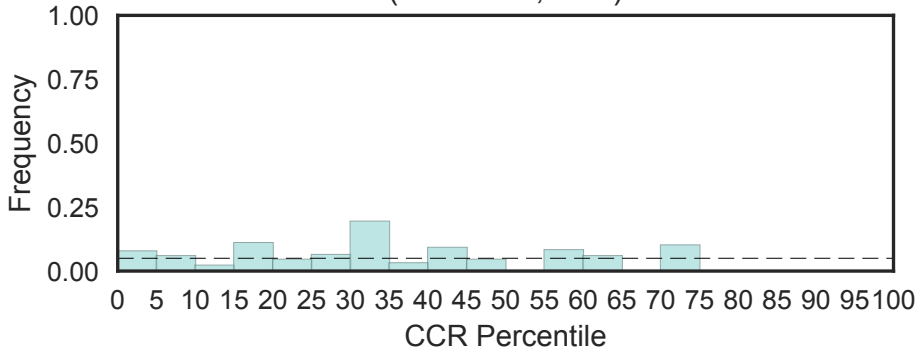

Domain of unknown function (DUF4735)  
(DUF4735, N=1)

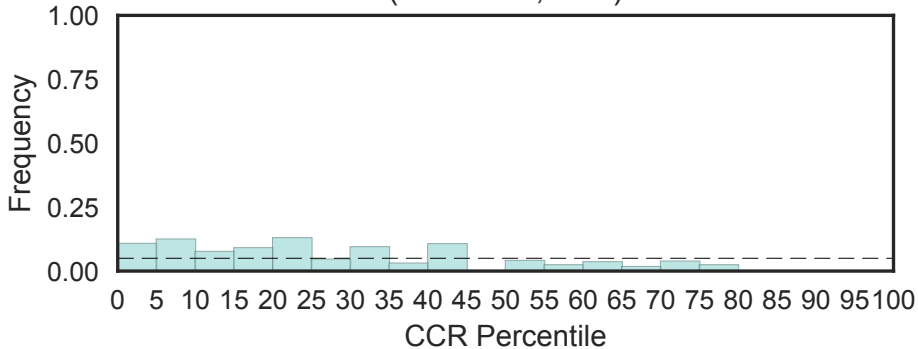

Domain of unknown function (DUF4745)  
(DUF4745, N=1)

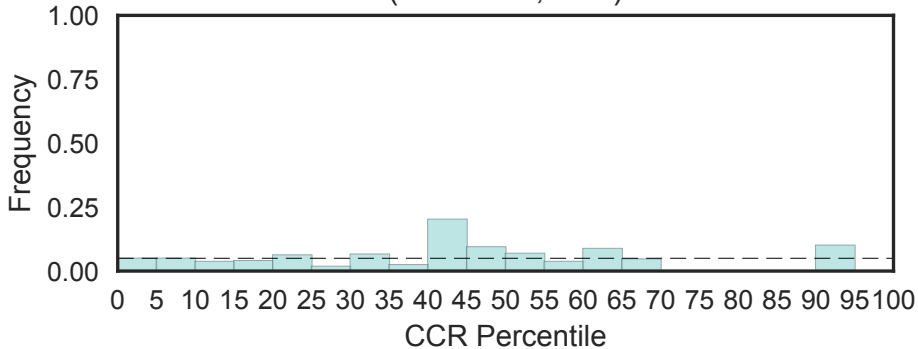

Domain of unknown function (DUF4748)  
(DUF4748, N=1)

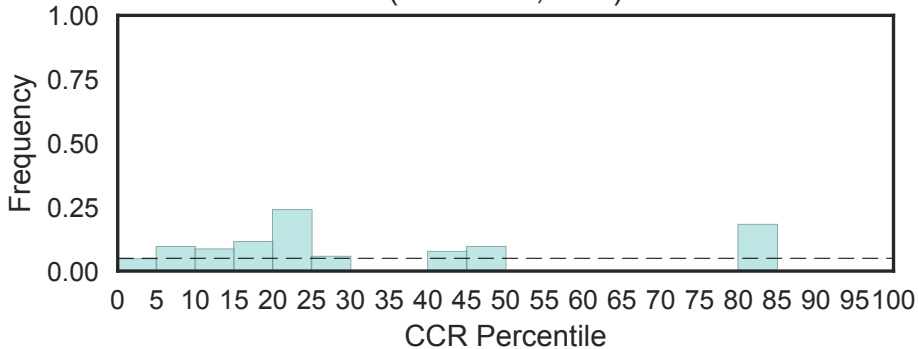



Domain of unknown function (DUF4749)  
(DUF4749, N=8)

Fisher's OR: 0.308; Bonferroni p-val: 1

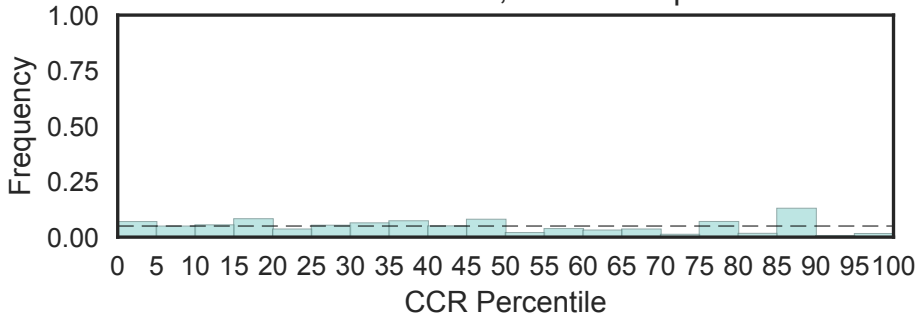

Domain of unknown function (DUF4750)  
(DUF4750, N=2)

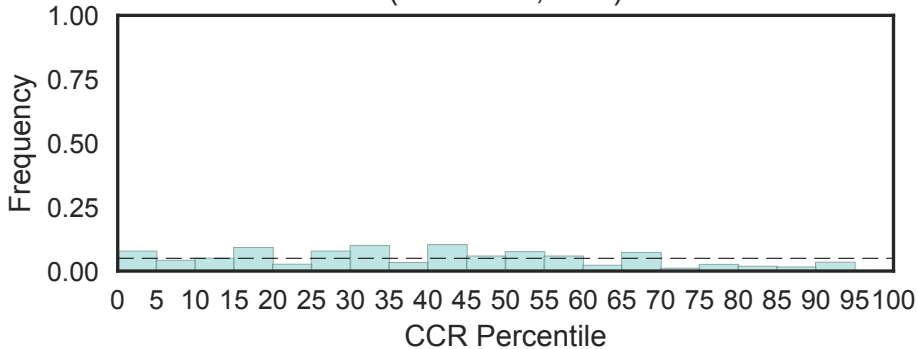

Domain of unknown function (DUF4757)  
(DUF4757, N=3)

Fisher's OR: 0.239; Bonferroni p-val: 1

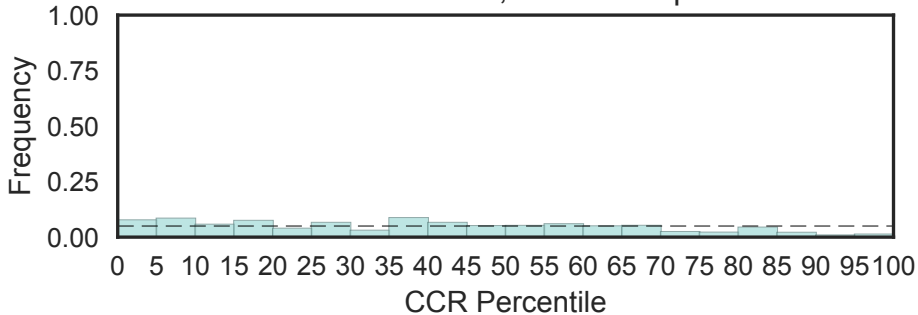

Domain of unknown function (DUF4764)  
(DUF4764, N=1)

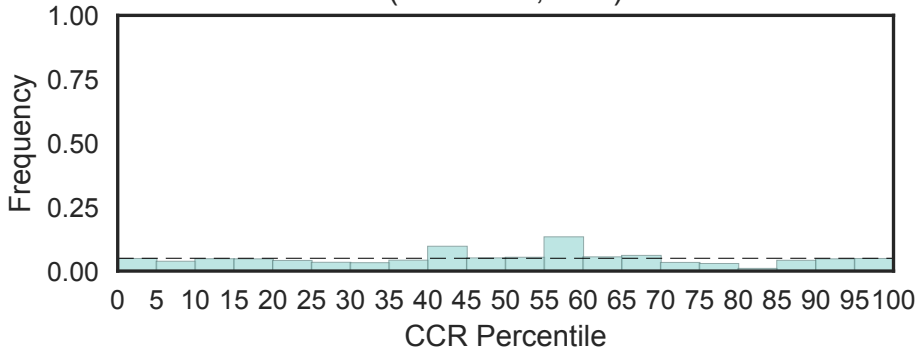

Domain of unknown function (DUF4772)  
(DUF4772, N=1)

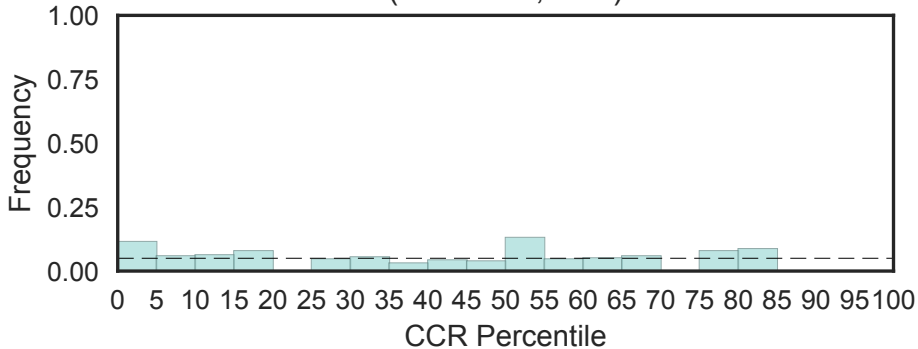

Domain of unknown function (DUF4782)  
(DUF4782, N=3)

Fisher's OR: 2.11; Bonferroni p-val: 1

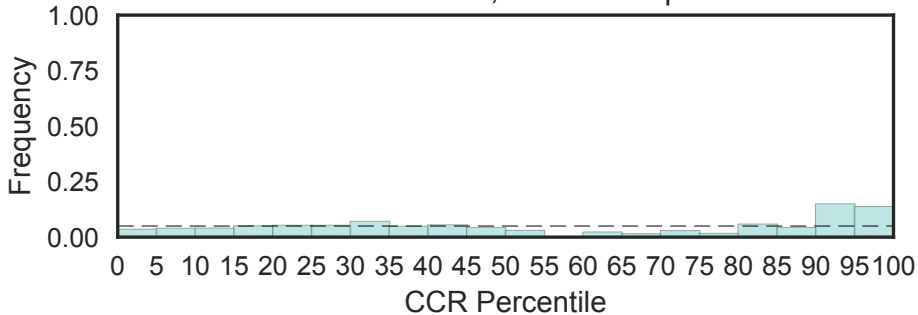

Domain of unknown function (DUF4795)  
(DUF4795, N=2)

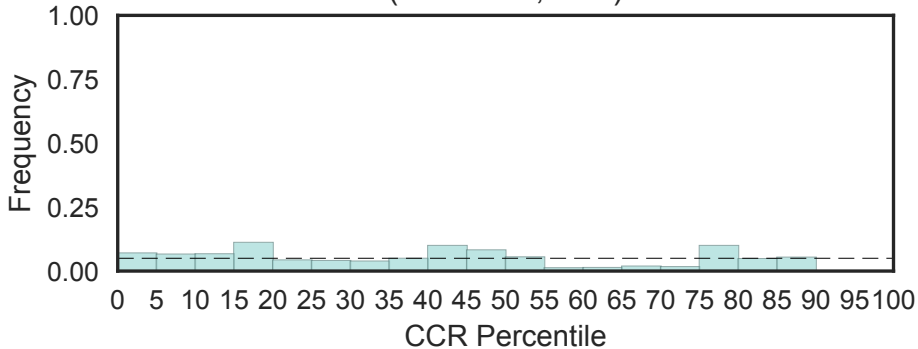

Domain of unknown function (DUF4796)  
(DUF4796, N=1)

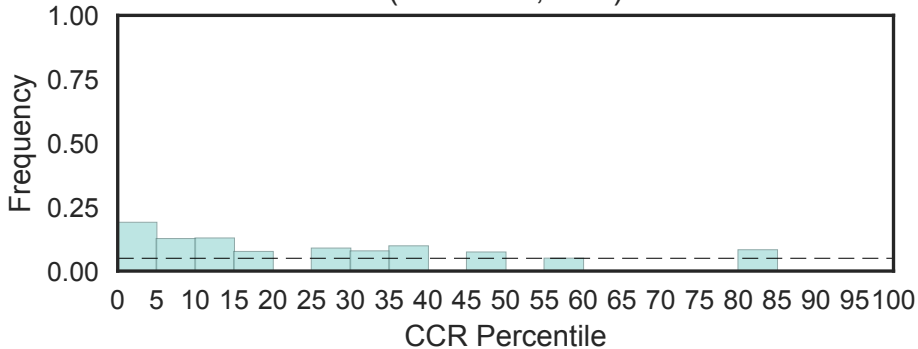



Domain of unknown function (DUF4800)  
(DUF4800, N=2)

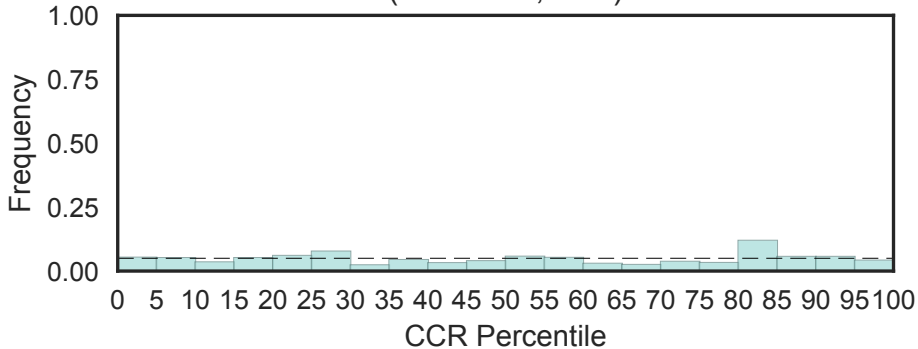

Domain of unknown function (DUF4801)  
(DUF4801, N=1)

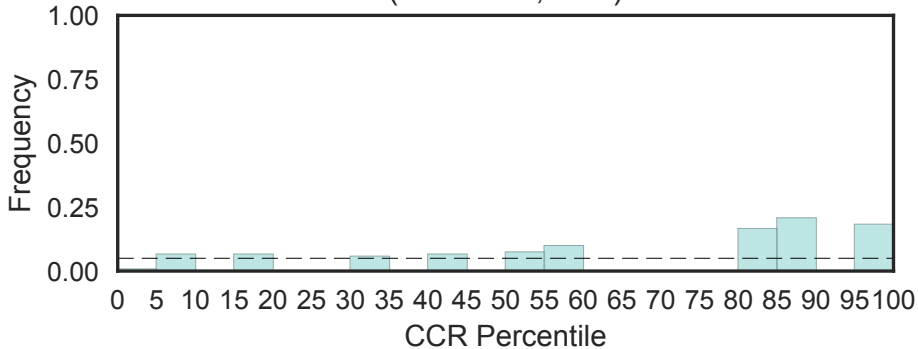

Domain of unknown function (DUF4808)  
(DUF4808, N=1)

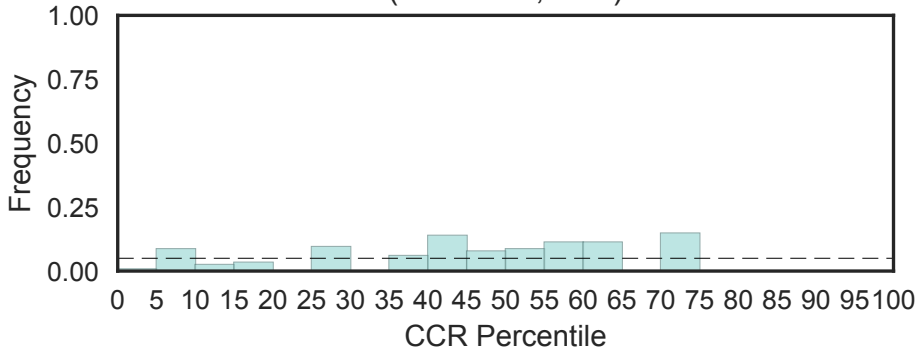

Domain of unknown function (DUF4821)  
(DUF4821, N=1)

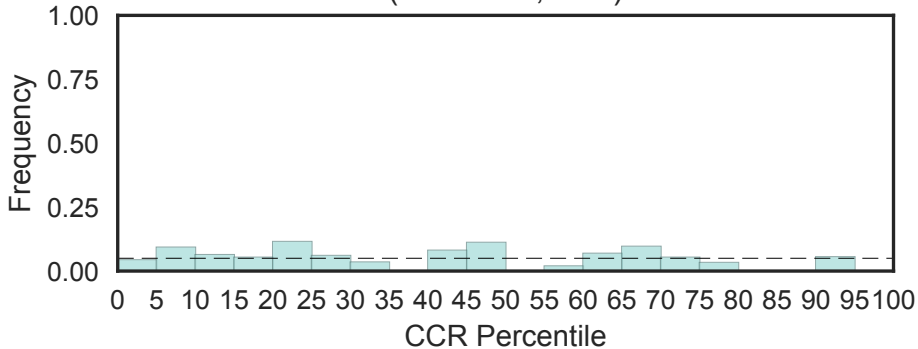

Domain of unknown function (DUF4927)  
(DUF4927, N=2)

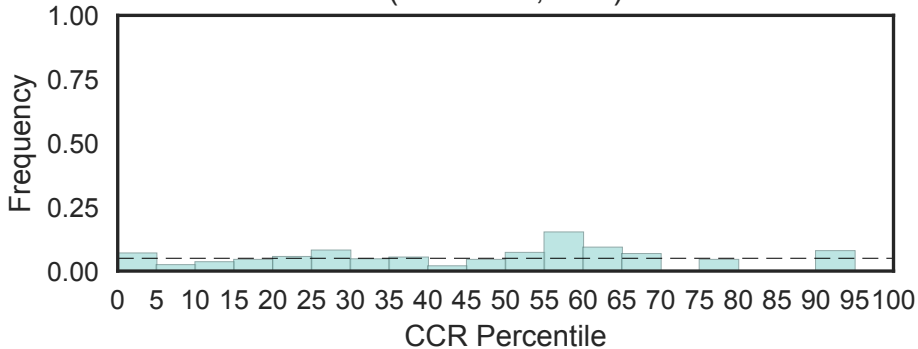

Domain of unknown function (DUF4939)  
(DUF4939, N=4)

Fisher's OR: 0; Bonferroni p-val: 1

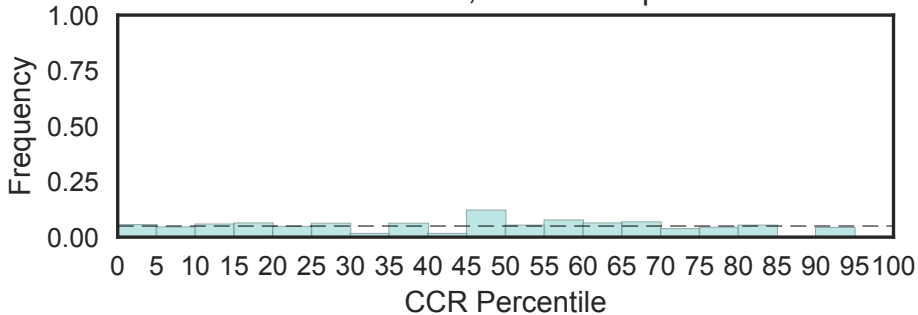

Domain of unknown function (DUF4962)  
(DUF4962, N=1)

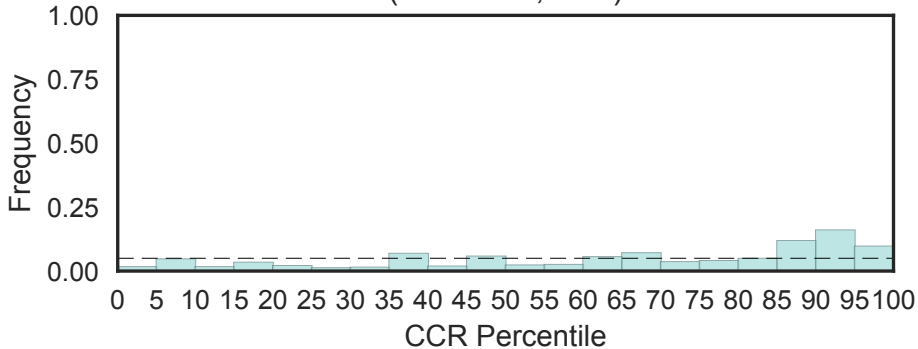

Domain of unknown function (DUF4976)  
(DUF4976, N=1)

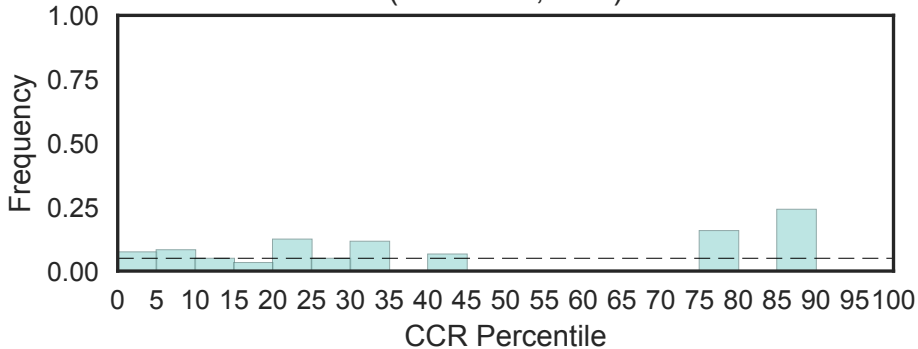



Protein of unknown function (DUF498/DUF598)  
(DUF498, N=2)

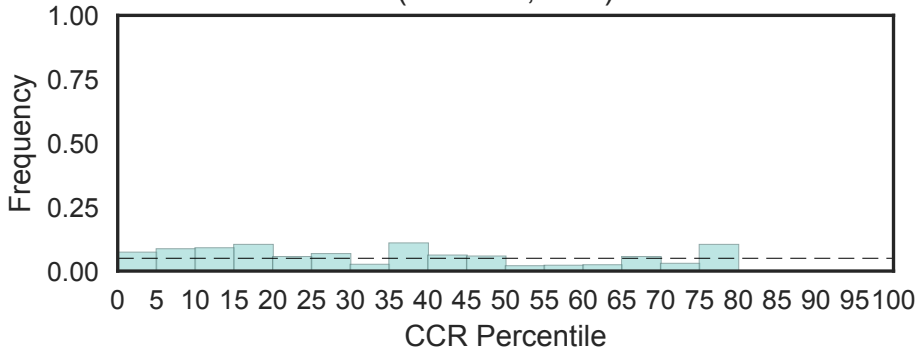

Domain of unknown function (DUF5009)  
(DUF5009, N=1)

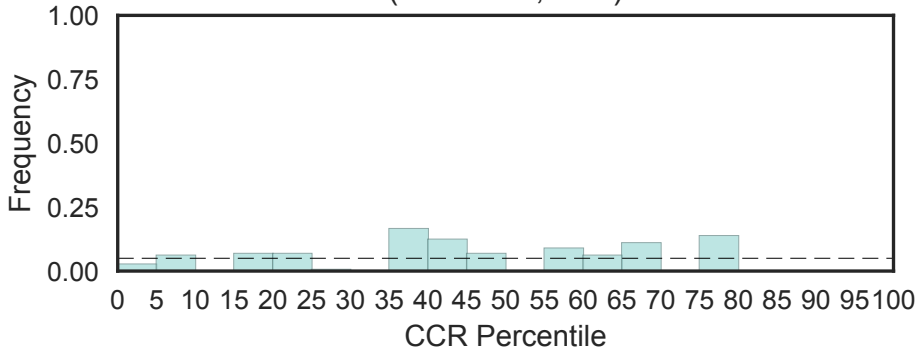

Protein of unknown function (DUF504)  
(DUF504, N=1)

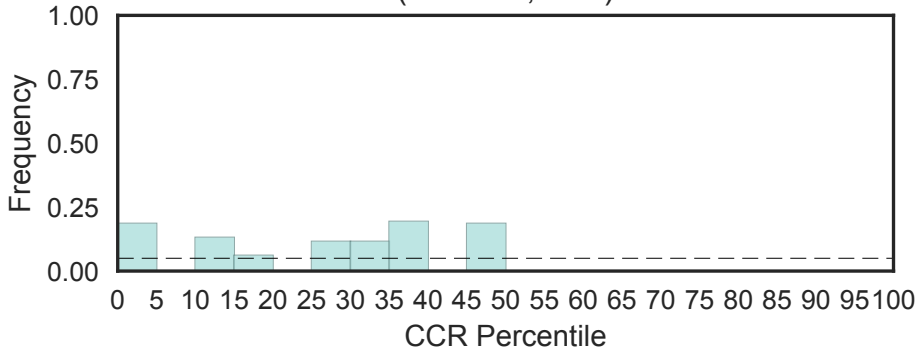

Domain of unknown function (DUF5050)  
(DUF5050, N=2)

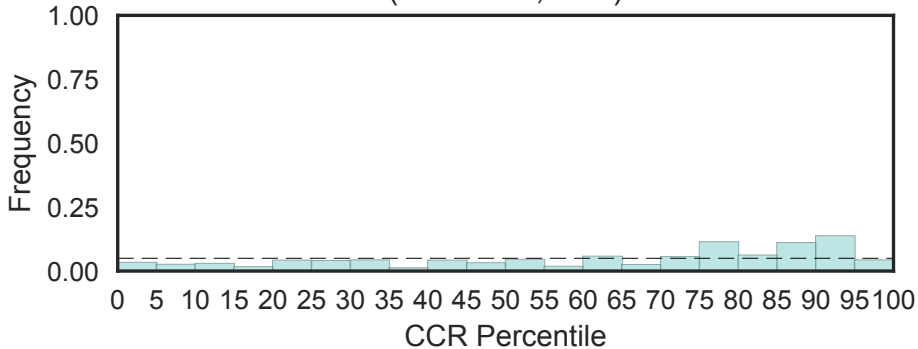

# 6-bladed beta-propeller (DUF5128, N=2)

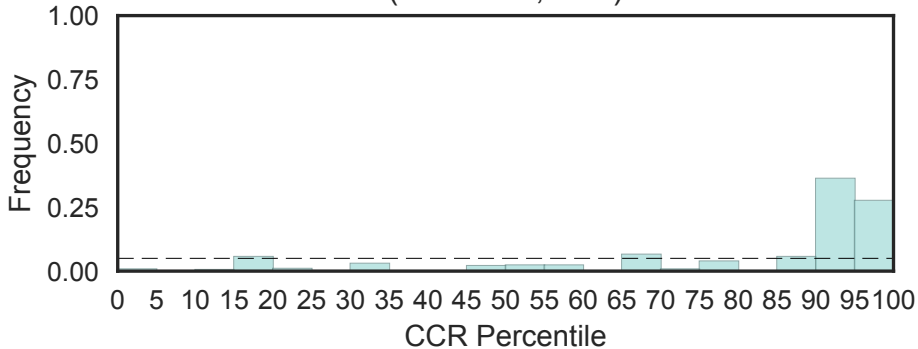

ApaG domain  
(DUF525, N=2)

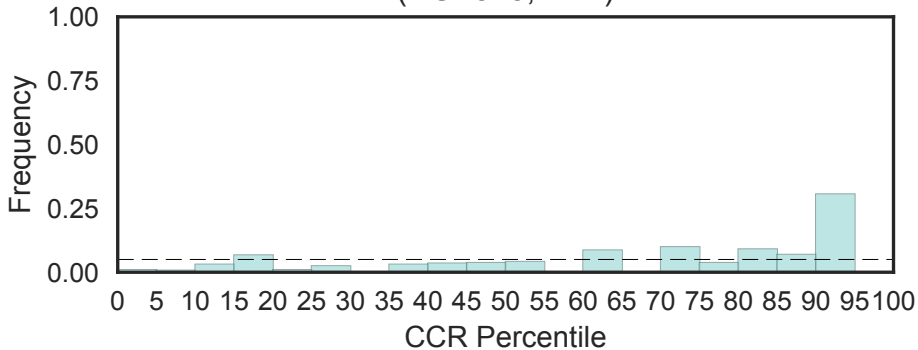

Domain of unknown function (DUF543)  
(DUF543, N=1)

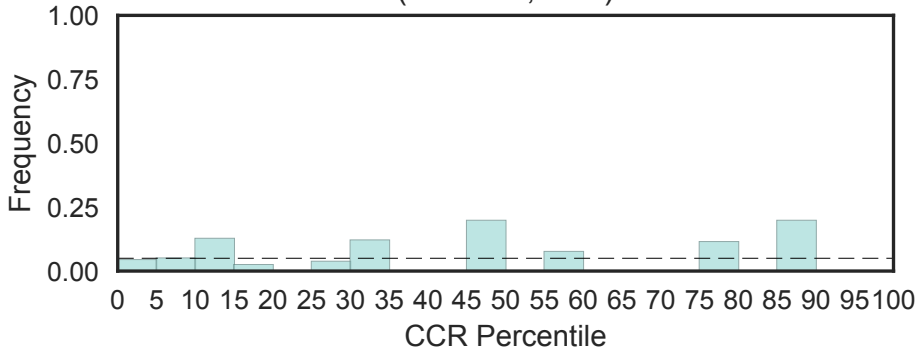

Protein of unknown function (DUF563)  
(DUF563, N=2)

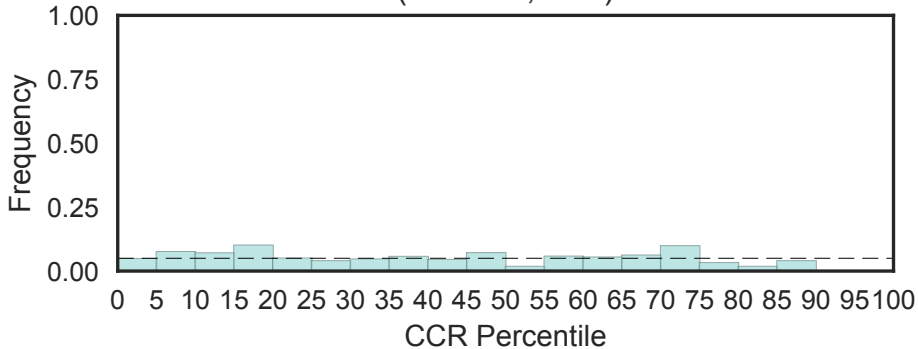



Family of unknown function (DUF572)  
(DUF572, N=2)

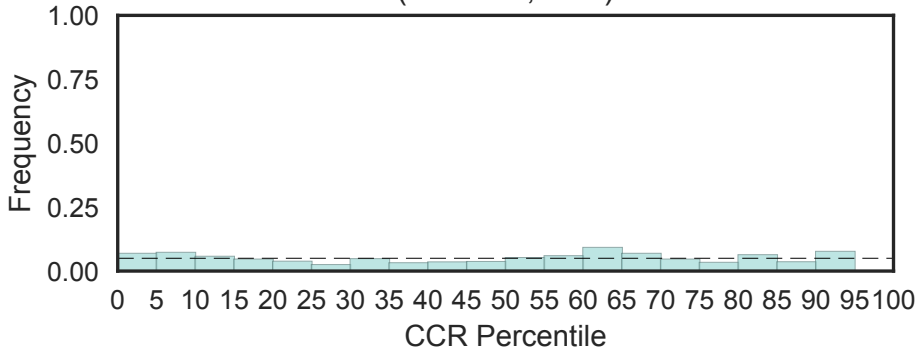

Glycosyl-hydrolase family 116, catalytic region  
(DUF608, N=1)

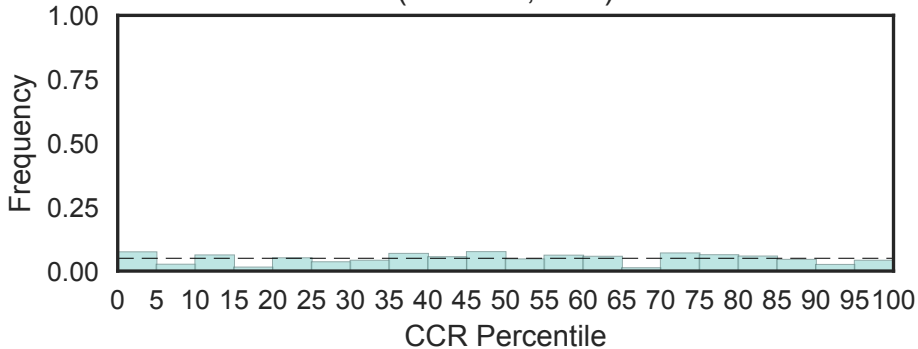

# Vitamin B6 photo-protection and homoeostasis (DUF647, N=1)

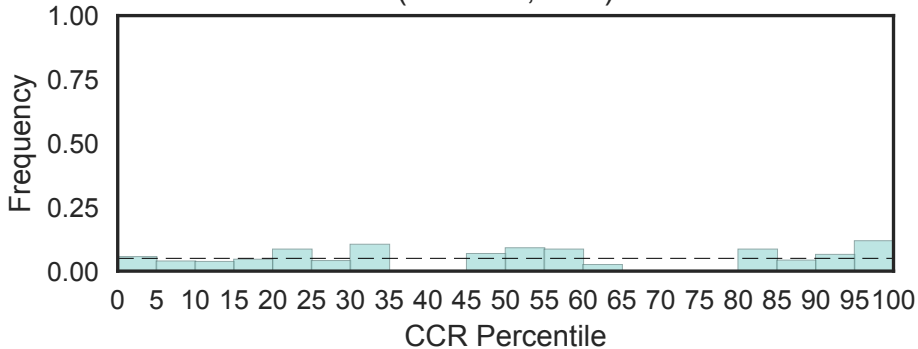

Protein of unknown function (DUF667)  
(DUF667, N=3)

Fisher's OR: 0; Bonferroni p-val: 1

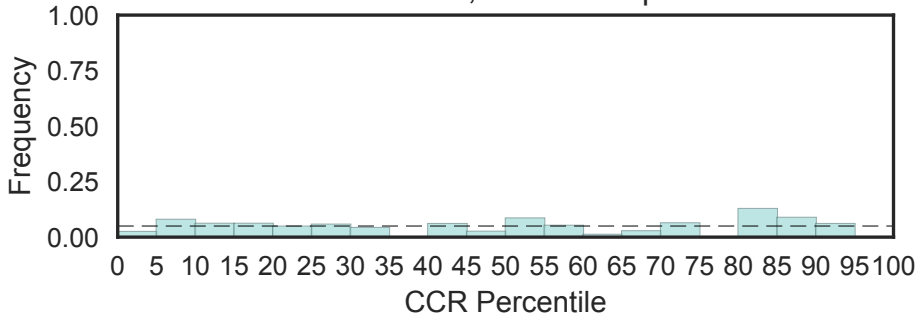

Putative serine esterase (DUF676)  
(DUF676, N=2)

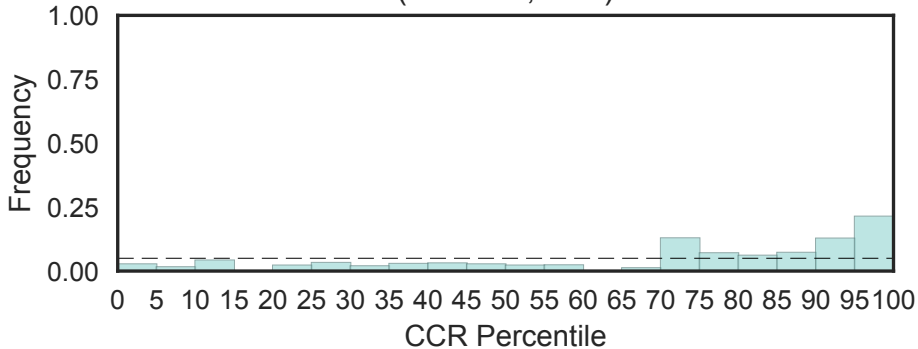

Family of unknown function (DUF716)  
(DUF716, N=3)

Fisher's OR: 0; Bonferroni p-val: 1

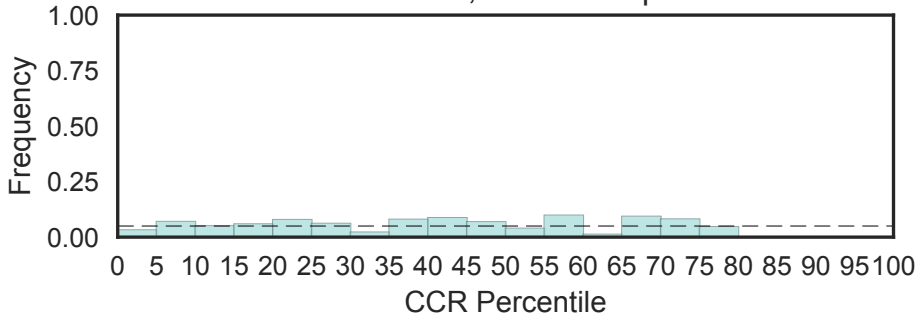

Protein of unknown function (DUF719)  
(DUF719, N=2)

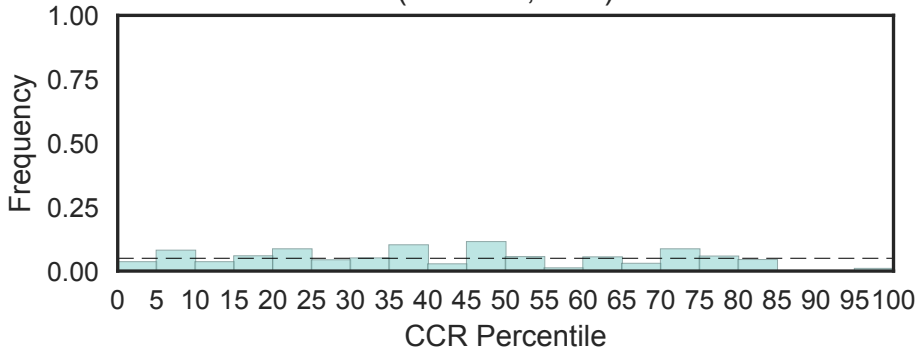

Protein of unknown function (DUF726)  
(DUF726, N=1)

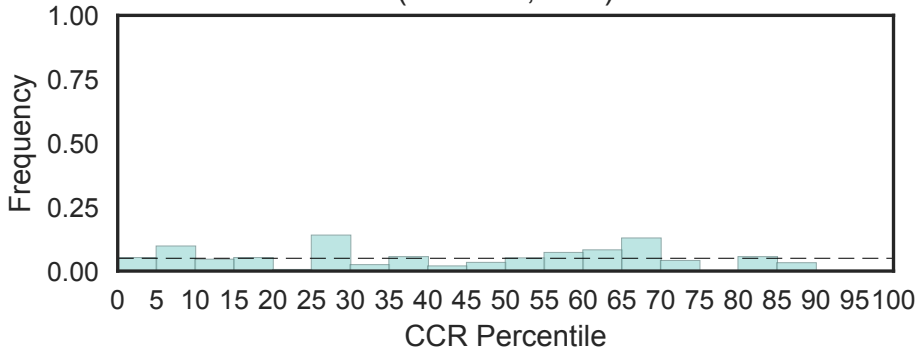



Protein of unknown function (DUF727)  
(DUF727, N=1)

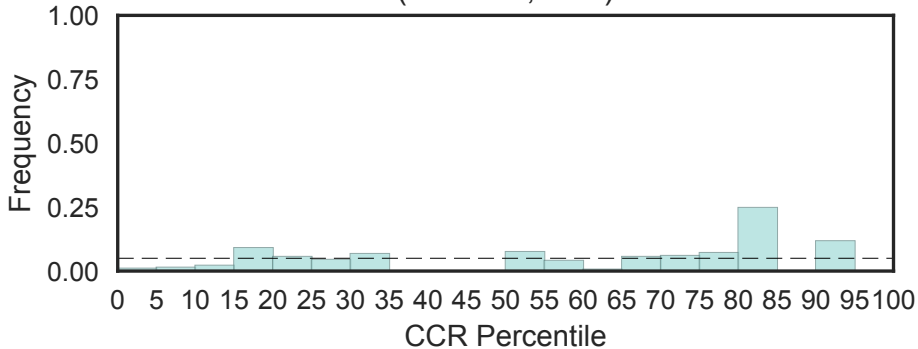

Protein of unknown function (DUF737)  
(DUF737, N=3)

Fisher's OR: 0; Bonferroni p-val: 1

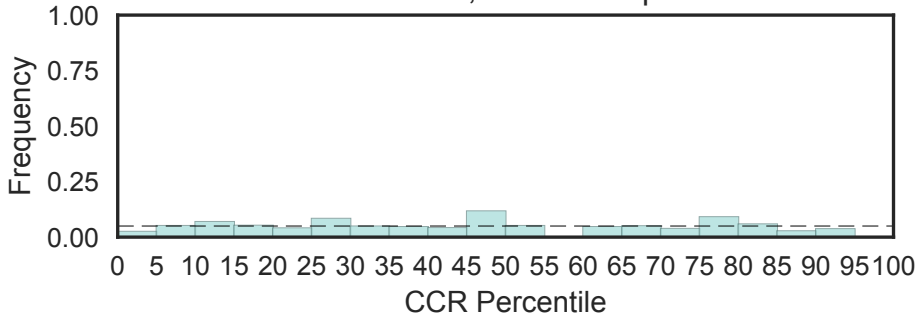

Eukaryotic membrane protein family  
(DUF747, N=1)

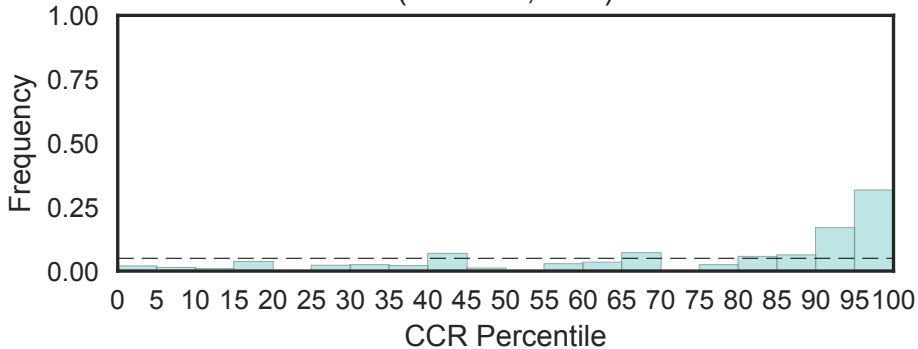

Domain of unknown function (DUF758)  
(DUF758, N=4)

Fisher's OR: 0.449; Bonferroni p-val: 1

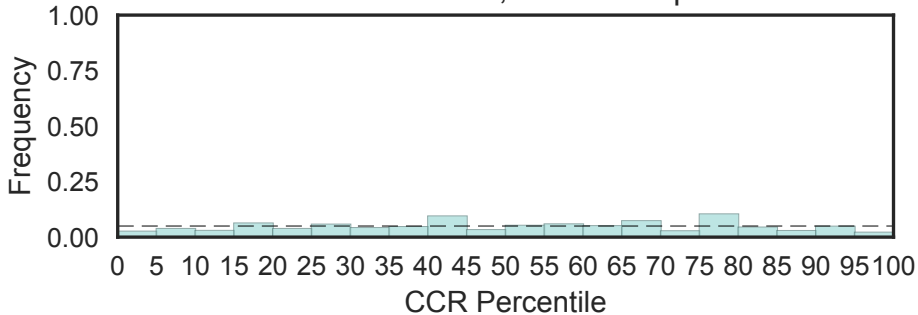

Protein of unknown function (DUF766)  
(DUF766, N=1)

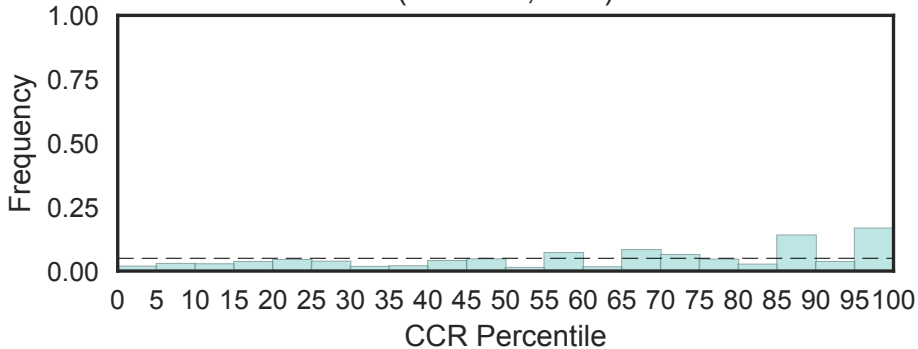

Protein of unknown function (DUF773)  
(DUF773, N=1)

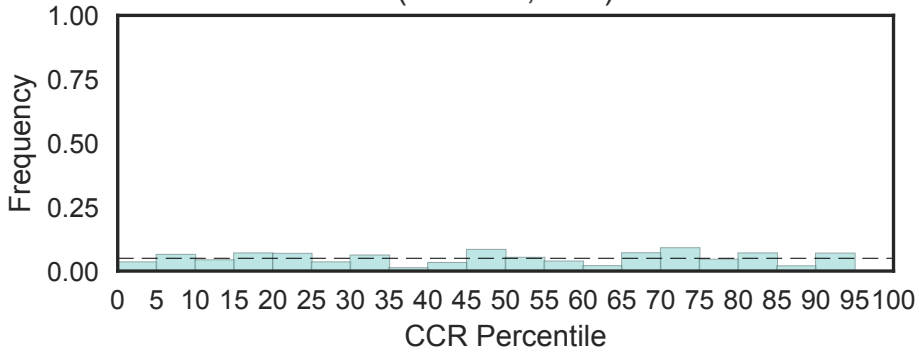

Protein of unknown function (DUF775)  
(DUF775, N=1)

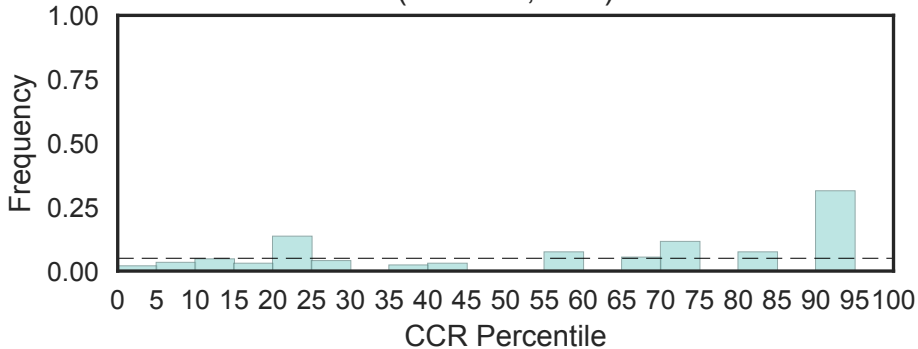

Protein of unknown function (DUF776)  
(DUF776, N=1)

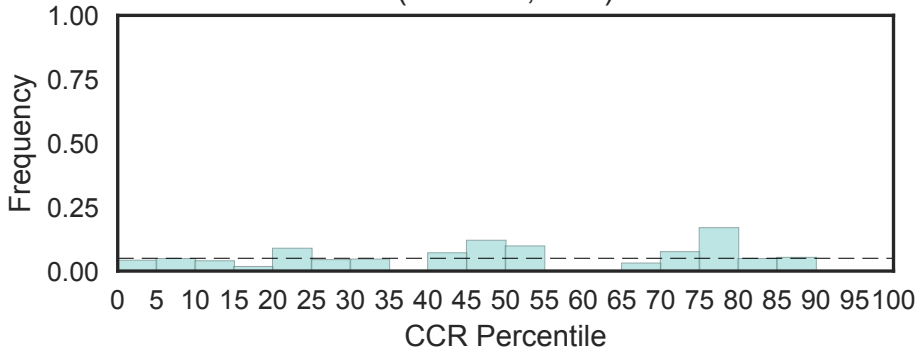



Protein of unknown function (DUF778)  
(DUF778, N=2)

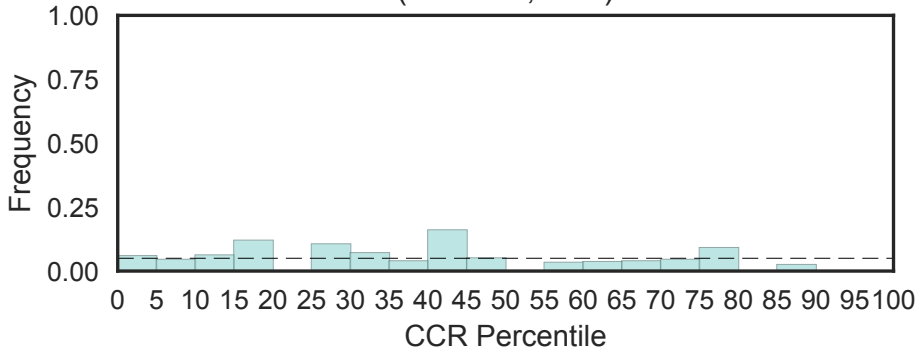

Protein of unknown function (DUF788)  
(DUF788, N=1)

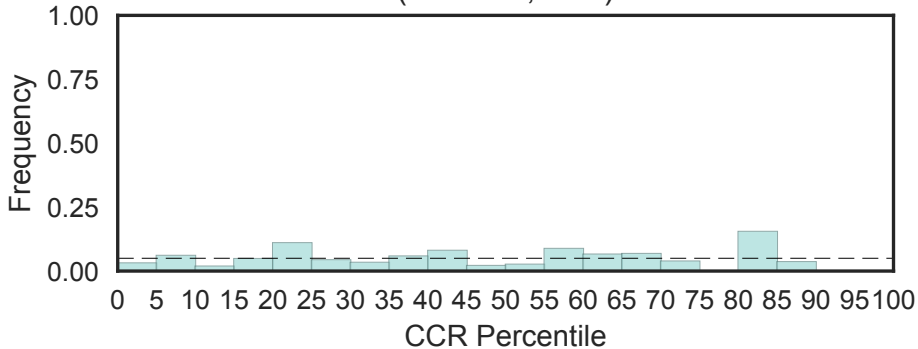

Domain of unknown function (DUF814)  
(DUF814, N=2)

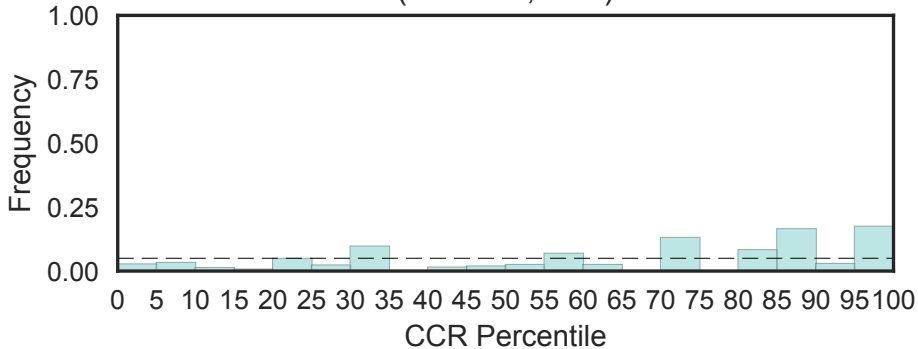

Protein of unknown function (DUF815)  
(DUF815, N=1)

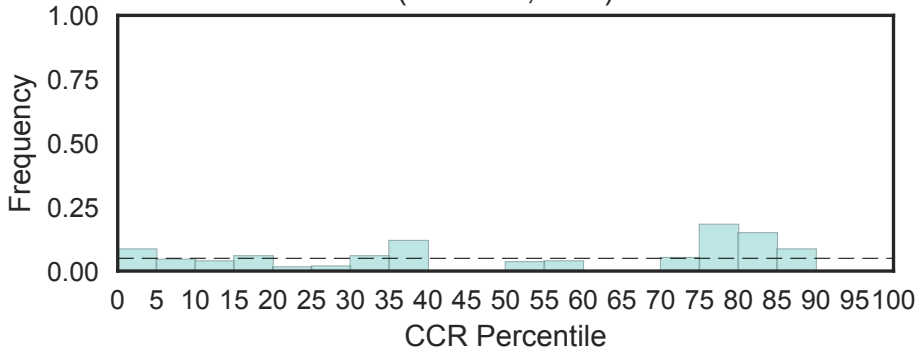

Eukaryotic protein of unknown function (DUF829)  
(DUF829, N=1)

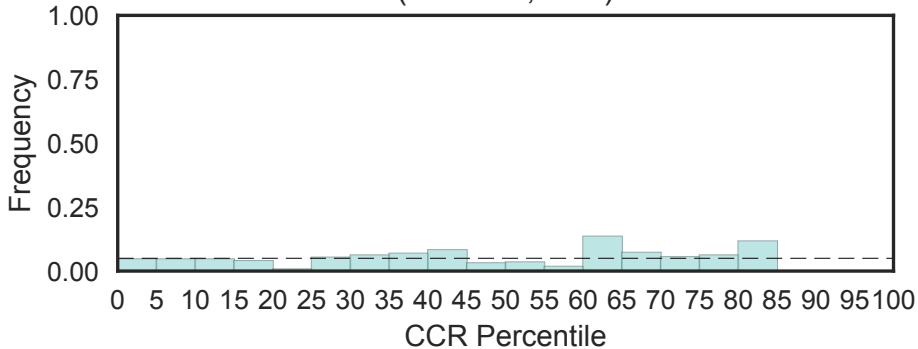

Glutaredoxin-like domain (DUF836)  
(DUF836, N=2)

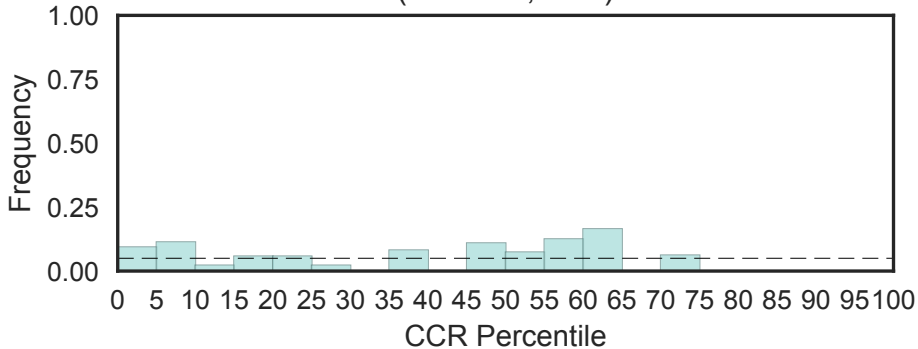

Eukaryotic protein of unknown function (DUF842)  
(DUF842, N=1)

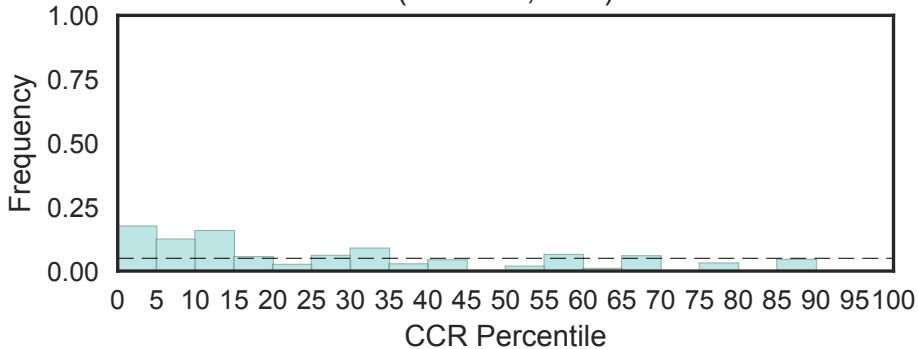

Eukaryotic protein of unknown function (DUF846)  
(DUF846, N=4)

Fisher's OR: 0; Bonferroni p-val: 1

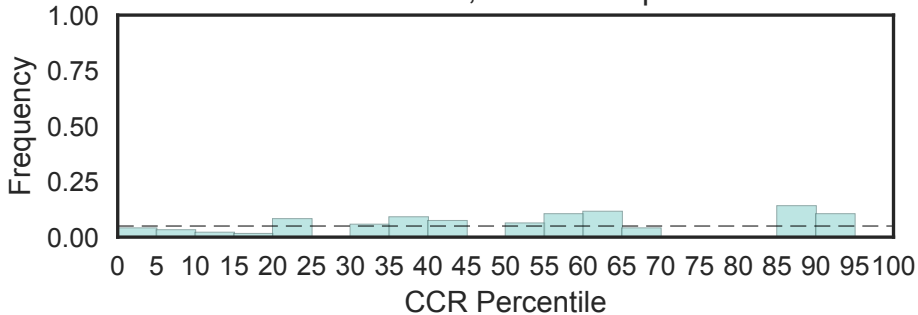



Eukaryotic protein of unknown function (DUF866)  
(DUF866, N=1)

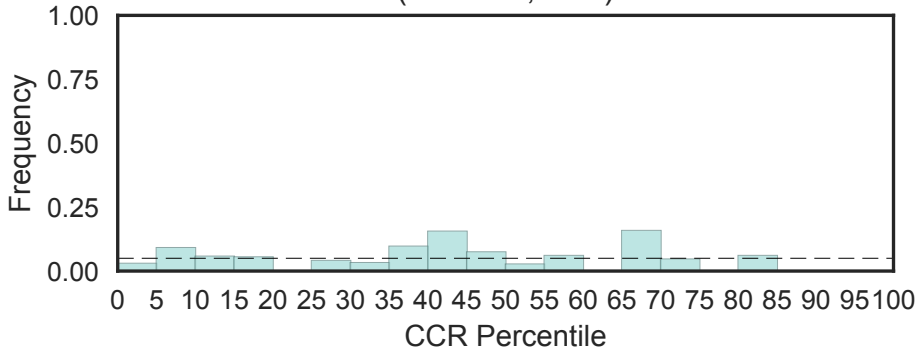

Eukaryotic protein of unknown function (DUF872)  
(DUF872, N=2)

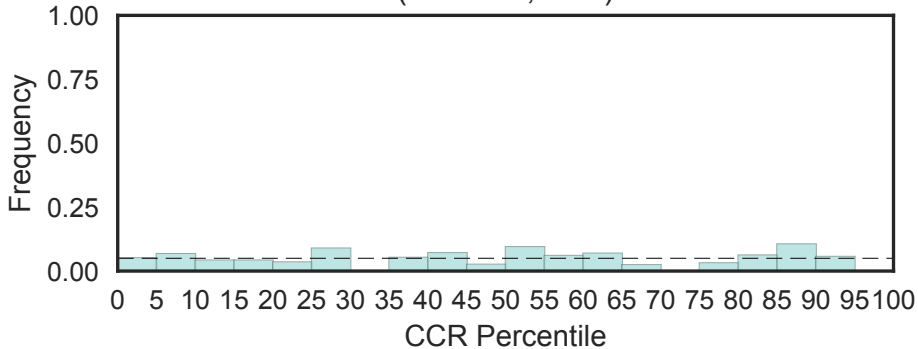

Protein of unknown function DUF89  
(DUF89, N=2)

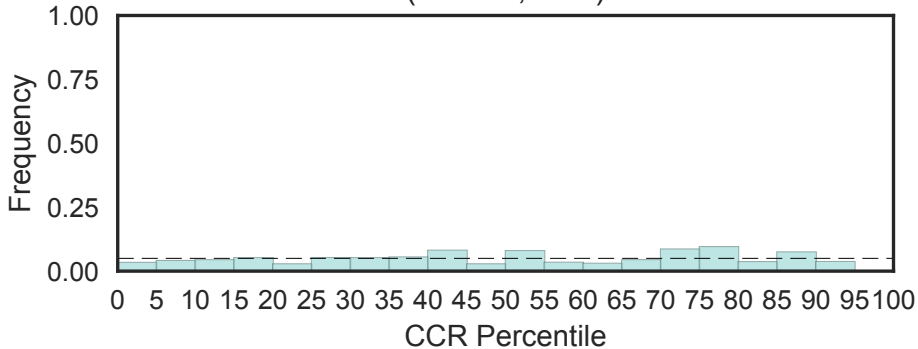

Alpha/beta hydrolase of unknown function (DUF900)  
(DUF900, N=1)

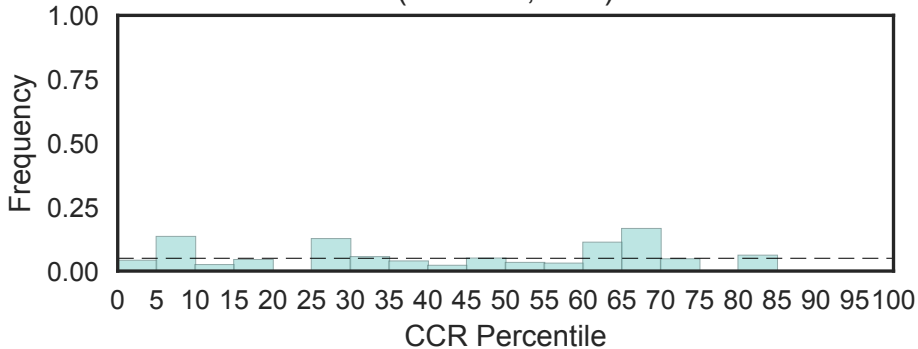

Domain of Unknown Function (DUF902)  
(DUF902, N=2)

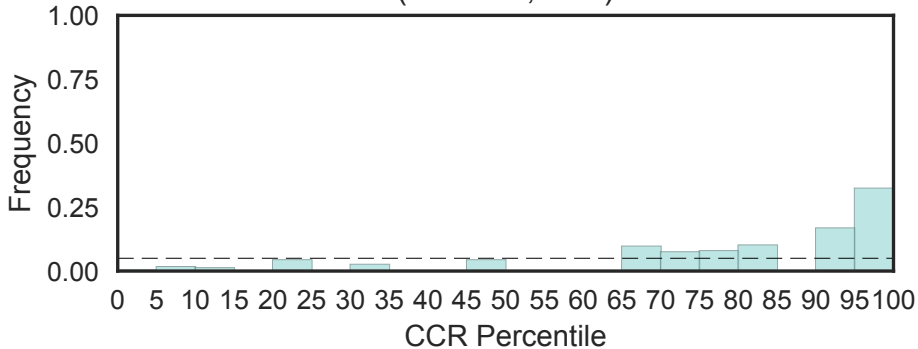

Integral membrane protein DUF92  
(DUF92, N=1)

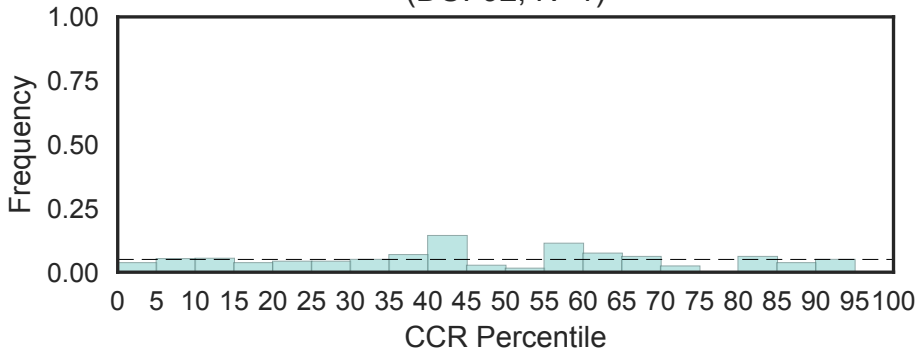

Protein of unknown function (DUF938)  
(DUF938, N=1)

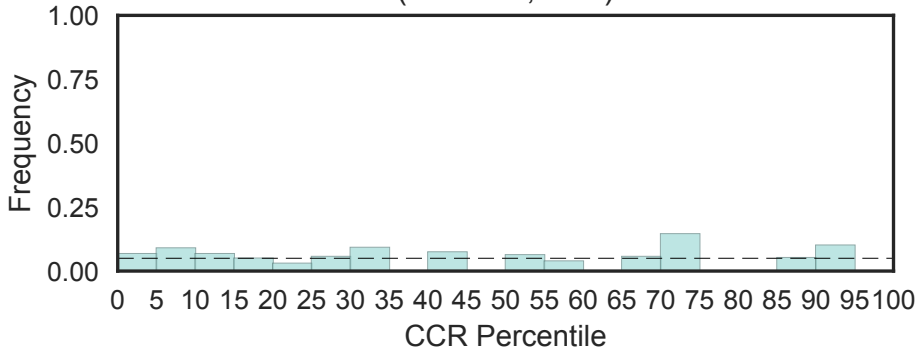

Eukaryotic protein of unknown function (DUF953)  
(DUF953, N=1)

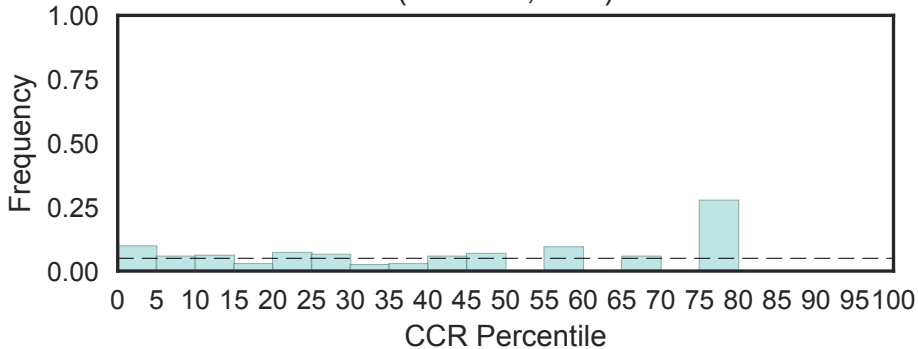



Domain of Unknown Function (DUF959)  
(DUF959, N=1)

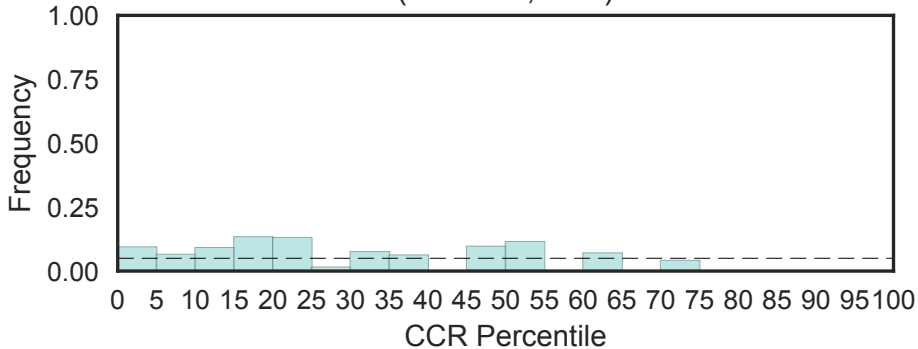

Protein of unknown function (DUF971)  
(DUF971, N=1)

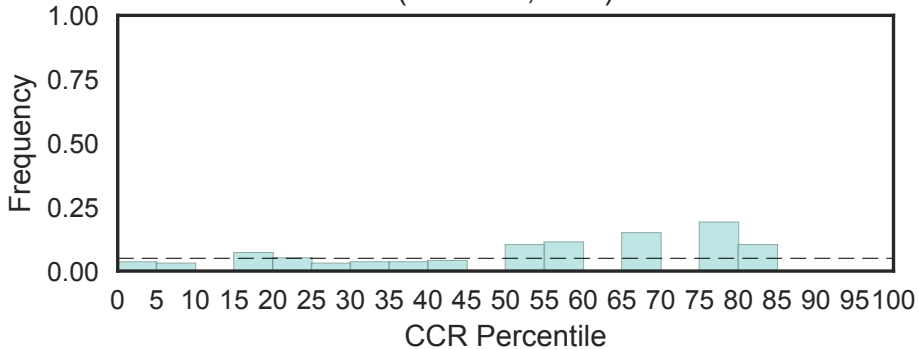

Protein of unknown function (DUF974)  
(DUF974, N=1)

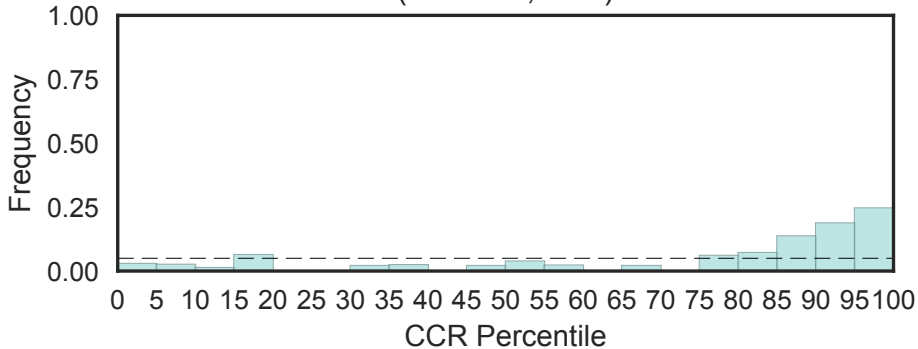

DUSP domain  
(DUSP, N=7)

Fisher's OR: 2.6; Bonferroni p-val: 1

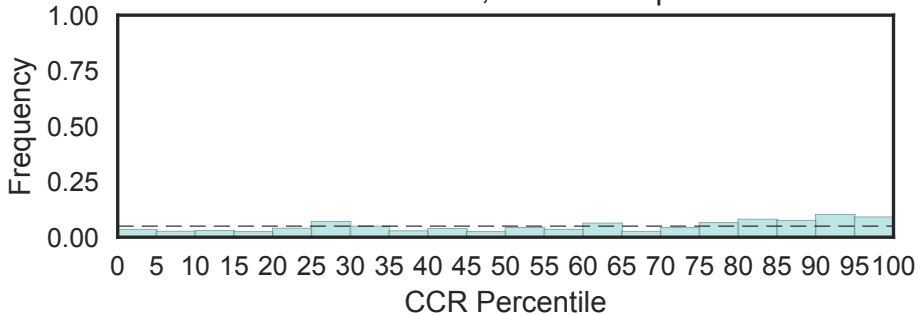

DWNN domain  
(DWNN, N=1)

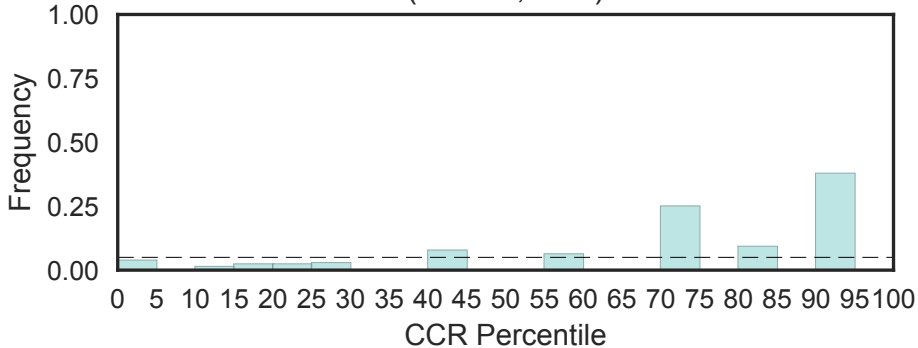

DZF domain  
(DZF, N=5)

Fisher's OR: 5.61; Bonferroni p-val: 0.00327

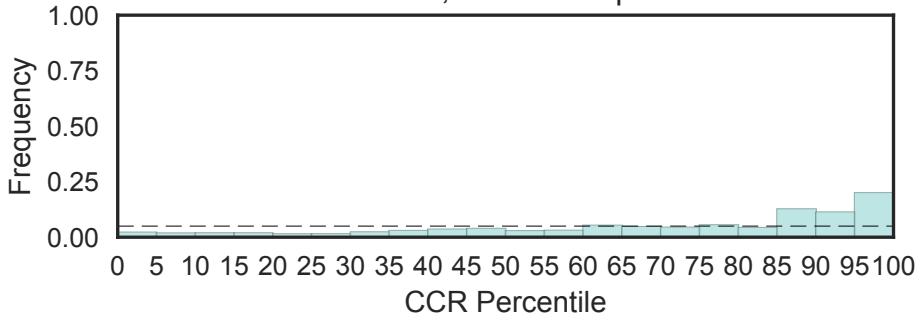

Double zinc ribbon  
(DZR, N=1)

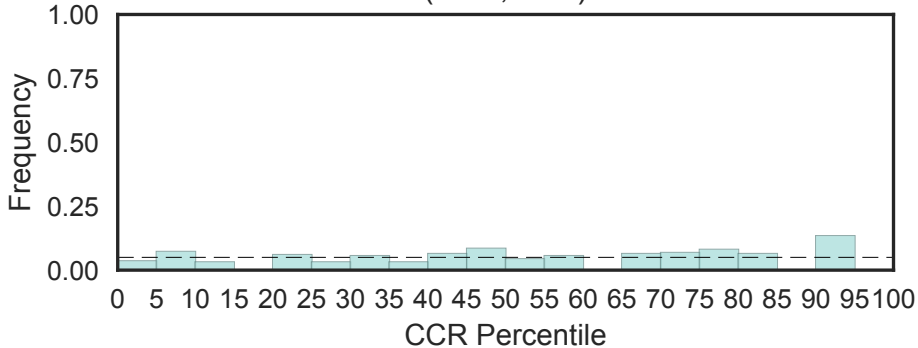

Dak1 domain  
(Dak1, N=1)

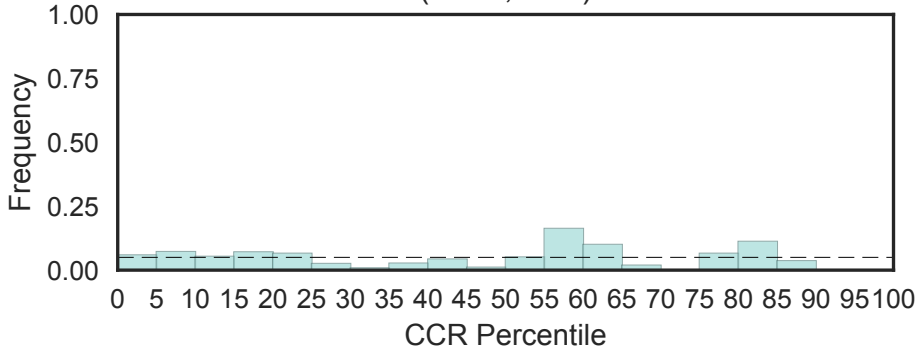



DAK2 domain  
(Dak2, N=1)

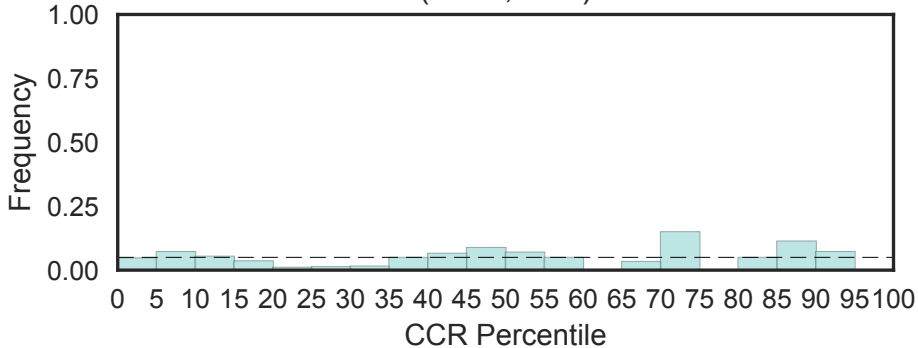

D-ala D-ala ligase C-terminus  
(Dala\_Dala\_lig\_C, N=8)  
Fisher's OR: 2.06; Bonferroni p-val: 1

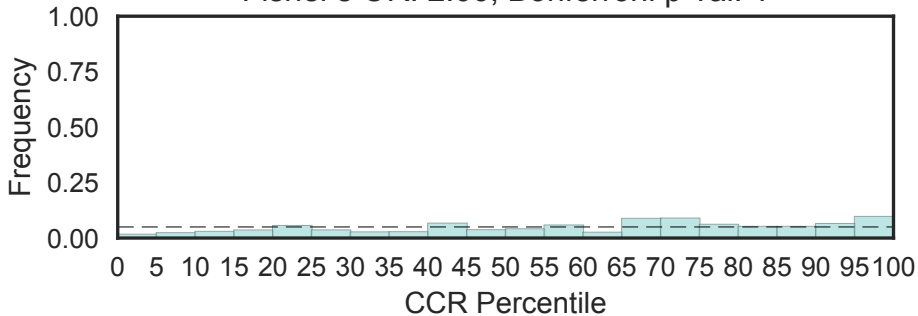

Dapper  
(Dapper, N=4)

Fisher's OR: 0.178; Bonferroni p-val: 1

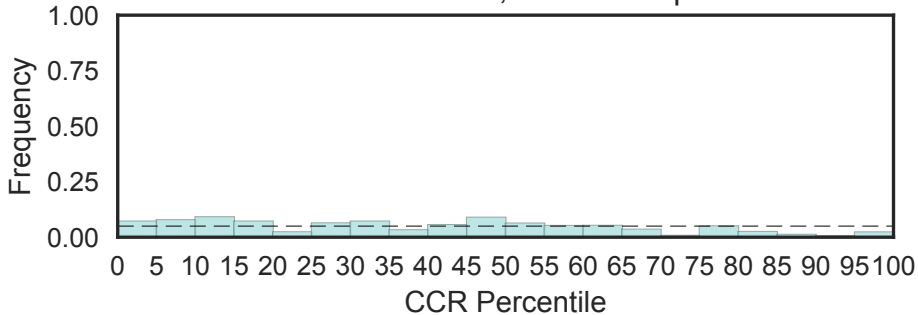

# Sister chromatid cohesion protein Dcc1 (Dcc1, N=1)

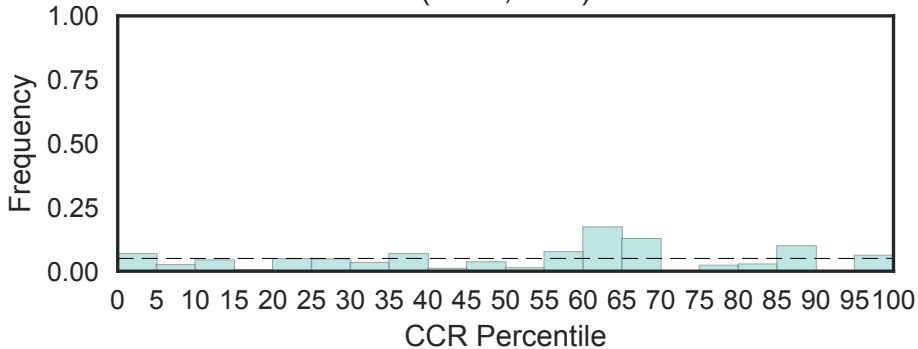

# Scavenger mRNA decapping enzyme (DcpS) N-terminal (DcpS, N=2)

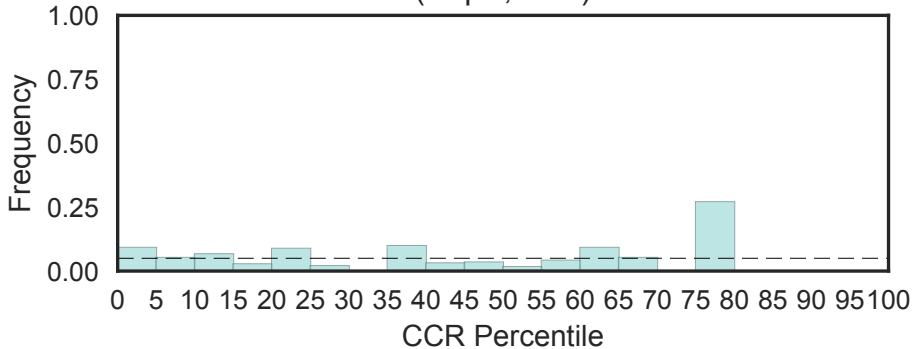

Scavenger mRNA decapping enzyme C-term binding  
(DcpS\_C, N=7)

Fisher's OR: 0; Bonferroni p-val: 1

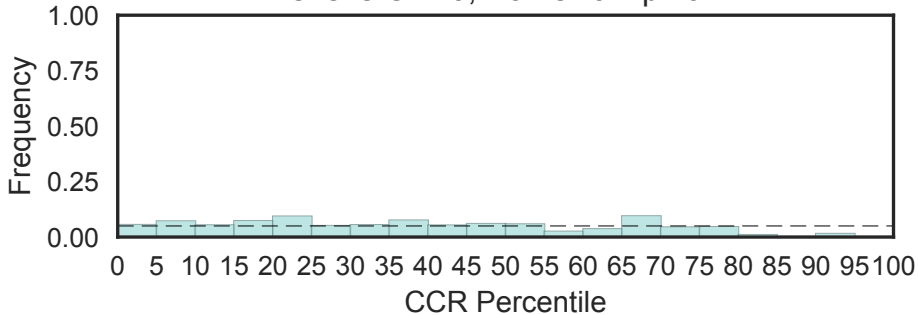

# Tripartite ATP-independent periplasmic transporter, DctM component (DctM, N=1)

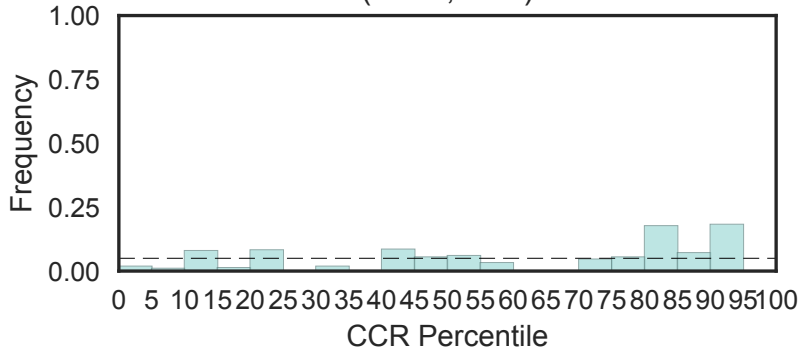

Death domain  
(Death, N=30)

Fisher's OR: 0.902; Bonferroni p-val: 1

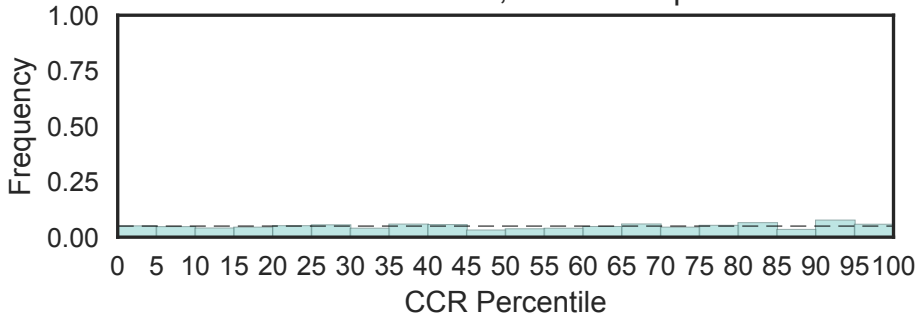



Mammalian defensin  
(Defensin\_1, N=6)  
Fisher's OR: 0; Bonferroni p-val: 1

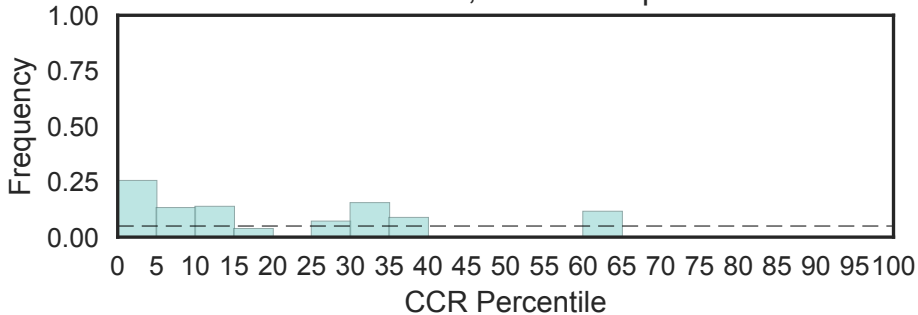

Beta defensin  
(Defensin\_beta, N=11)  
Fisher's OR: 0; Bonferroni p-val: 1

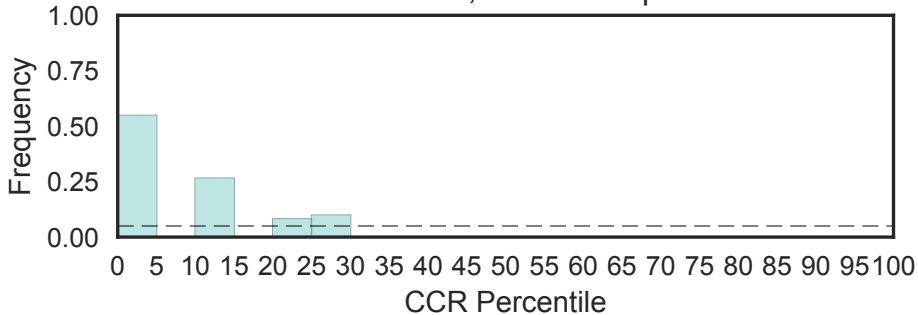

Beta defensin  
(Defensin\_beta\_2, N=30)  
Fisher's OR: 0; Bonferroni p-val: 1

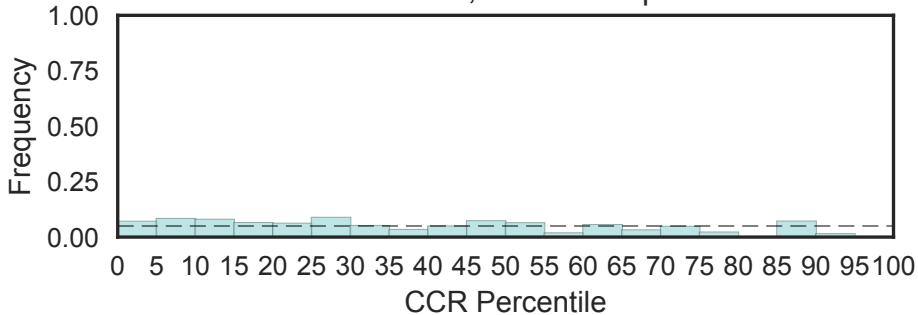

Big defensin  
(Defensin\_big, N=1)

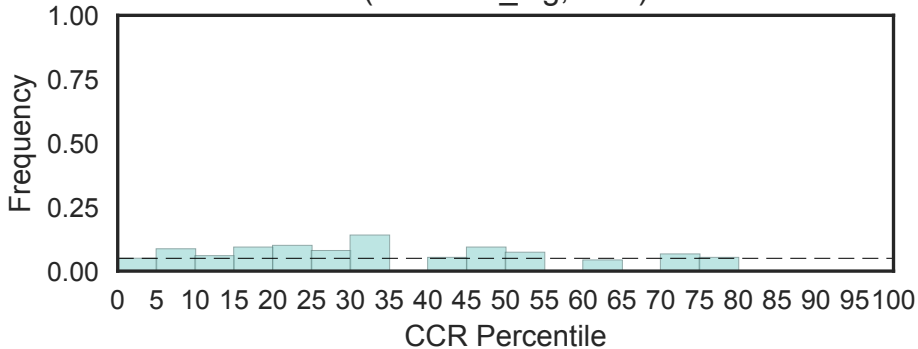

Defensin propeptide  
(Defensin\_propep, N=6)  
Fisher's OR: 0; Bonferroni p-val: 1

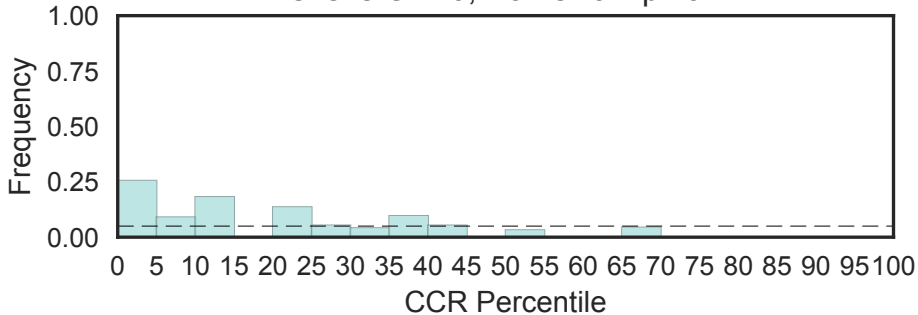

DegT/DnrJ/EryC1/StrS aminotransferase family  
(DegT\_DnrJ\_EryC1, N=2)

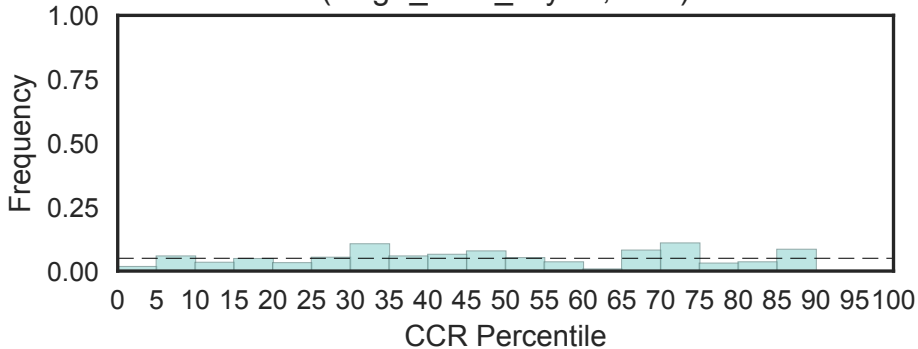

# Nephrin and CD2AP-binding protein, Dendrin (Dendrin, N=1)

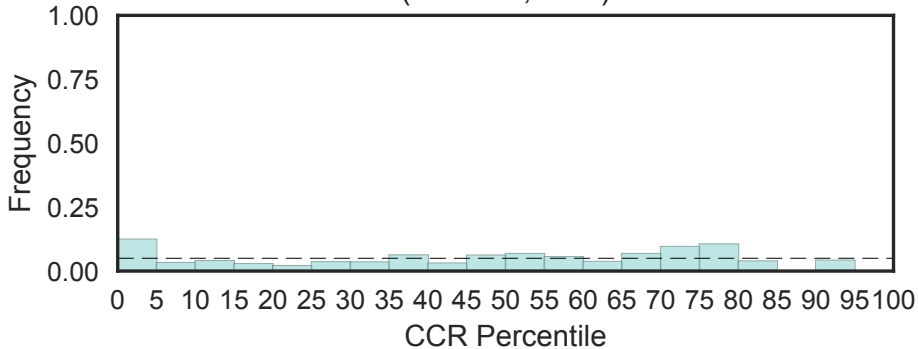

DeoC/LacD family aldolase  
(DeoC, N=1)

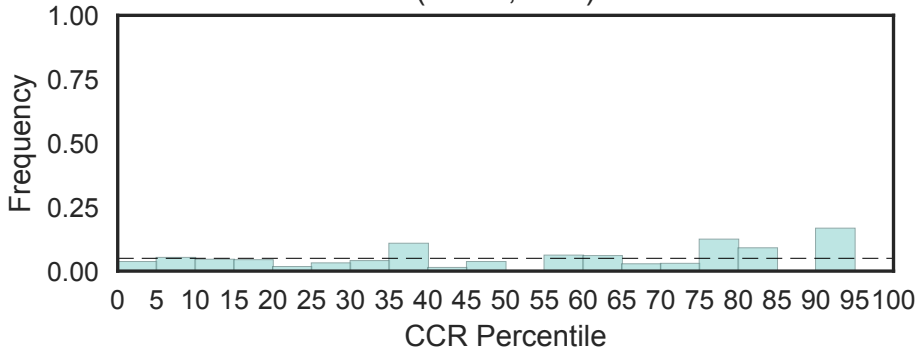



Dermcidin, antibiotic peptide  
(Dermcidin, N=1)

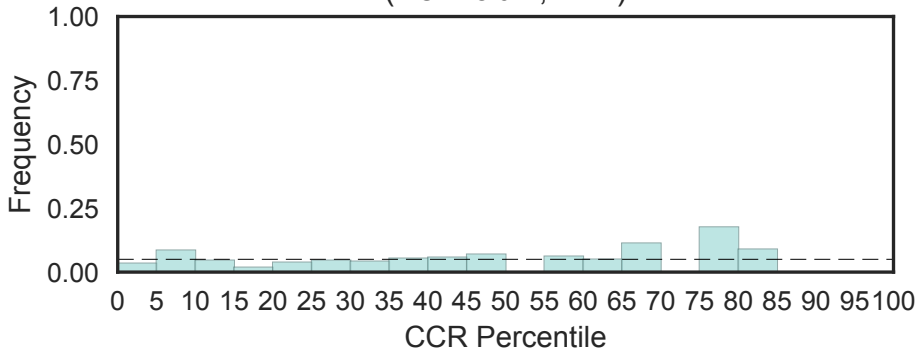

De-etiolated protein 1 Det1  
(Det1, N=1)

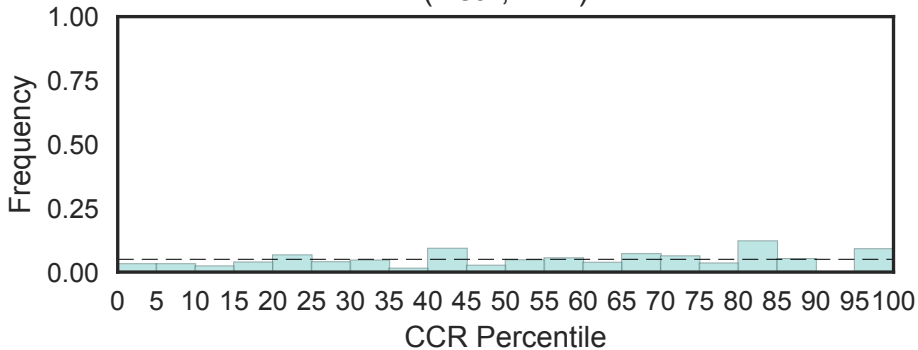

Dexamethasone-induced  
(Dexa\_ind, N=1)

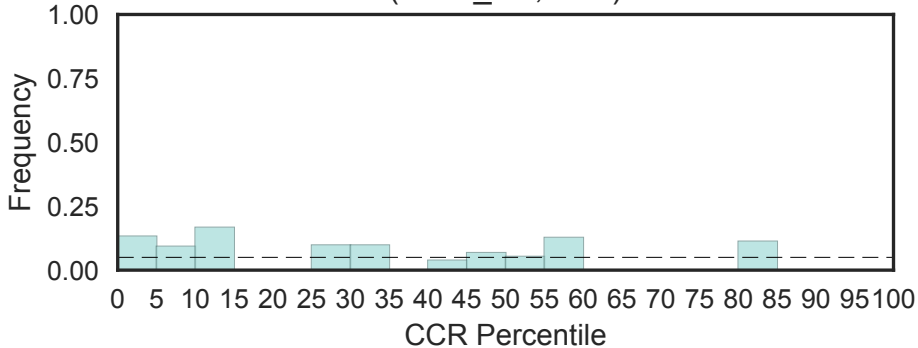

Dicer dimerisation domain  
(Dicer\_dimer, N=1)

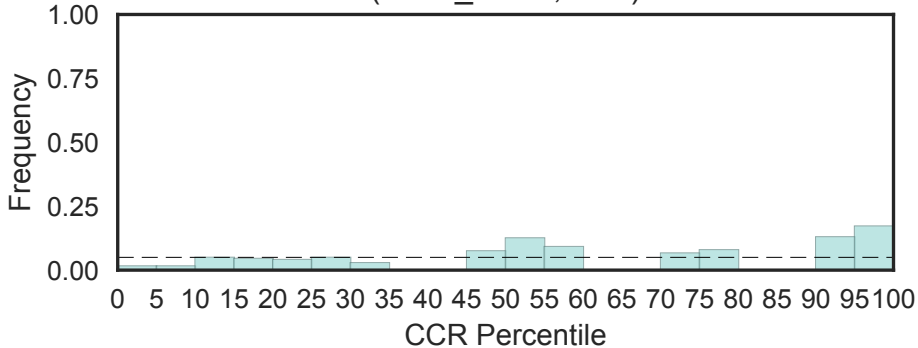

Dickkopf N-terminal cysteine-rich region  
(Dickkopf\_N, N=4)

Fisher's OR: 0; Bonferroni p-val: 1

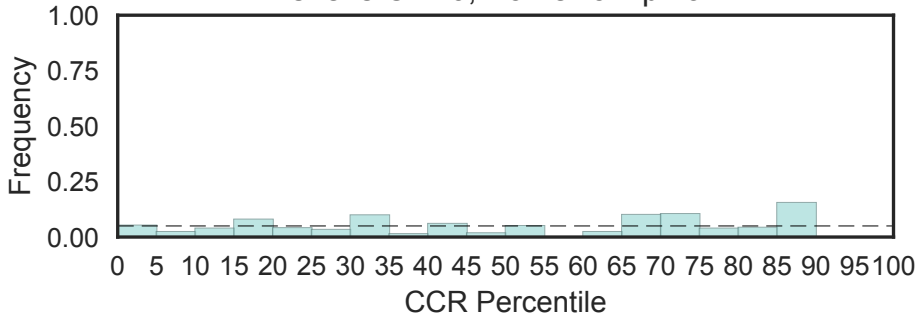

Slime mold cyclic AMP receptor  
(Dicty\_CAR, N=6)

Fisher's OR: 0.314; Bonferroni p-val: 1

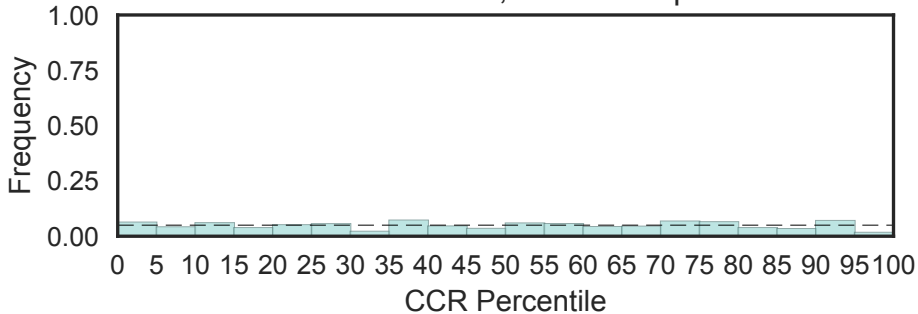

hAT family C-terminal dimerisation region  
(Dimer\_Tnp\_hAT, N=5)

Fisher's OR: 0; Bonferroni p-val: 1

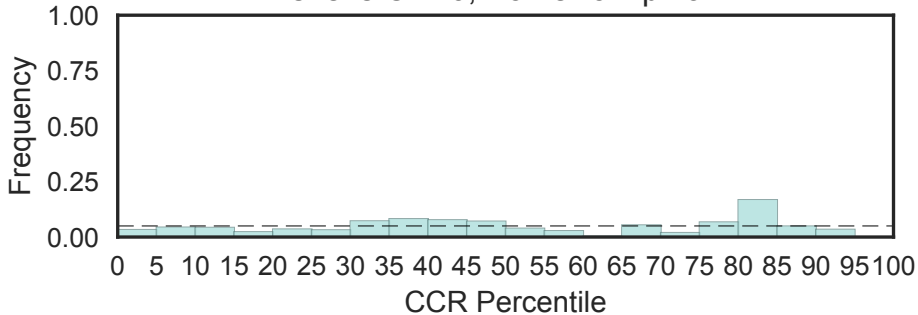

Diphthamide synthase  
(Diphthami\_syn\_2, N=1)

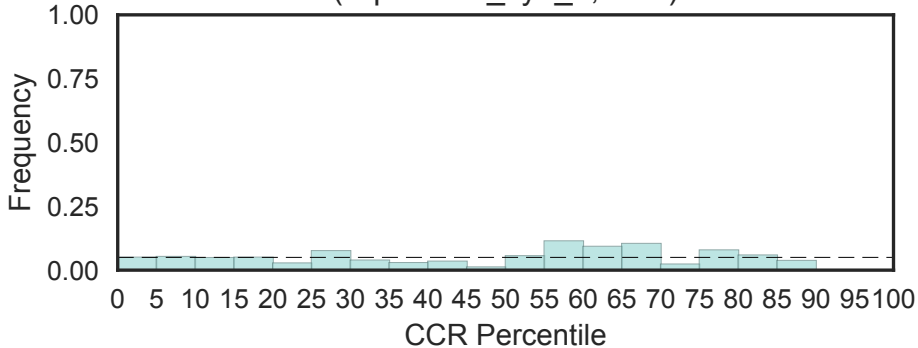



Putative diphthamide synthesis protein  
(Diphthamide\_syn, N=2)

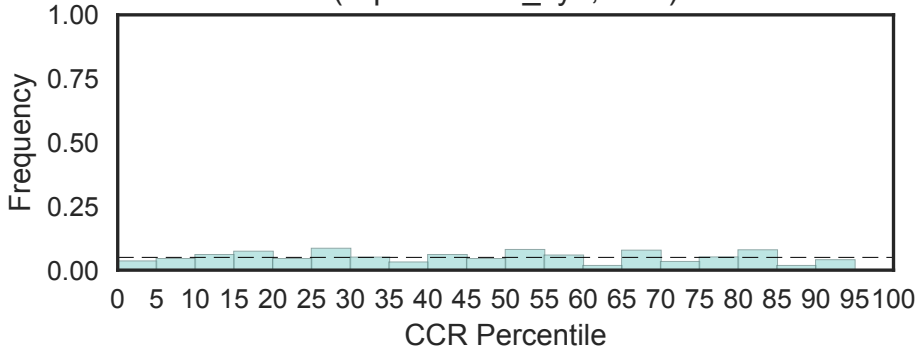

Dishevelled specific domain  
(Dishevelled, N=3)

Fisher's OR: 0; Bonferroni p-val: 1

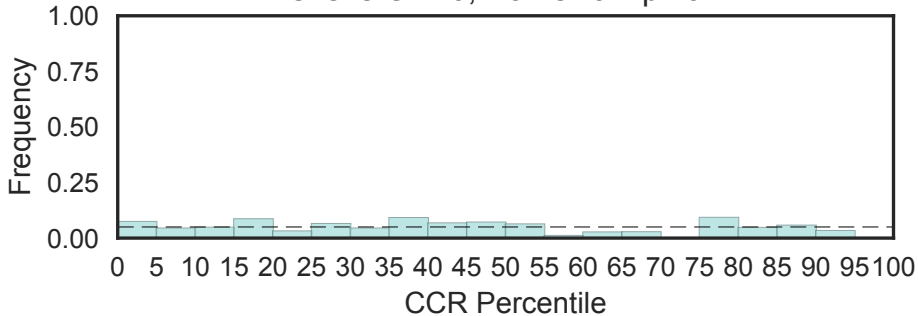

# Disintegrin

(Disintegrin, N=20)

Fisher's OR: 0.414; Bonferroni p-val: 1

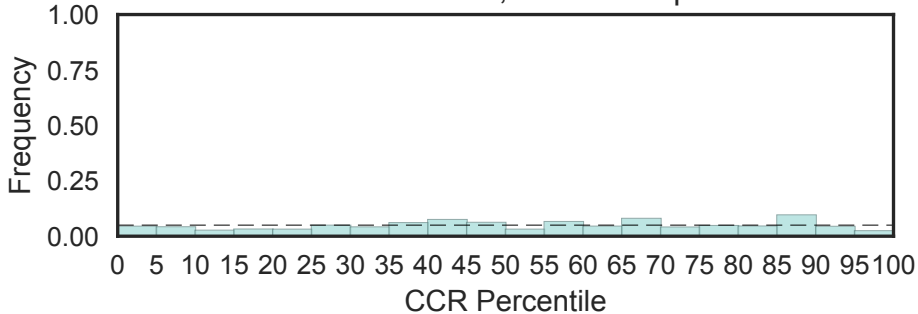

Double-sex mab3 related transcription factor 1  
(Dmrt1, N=1)

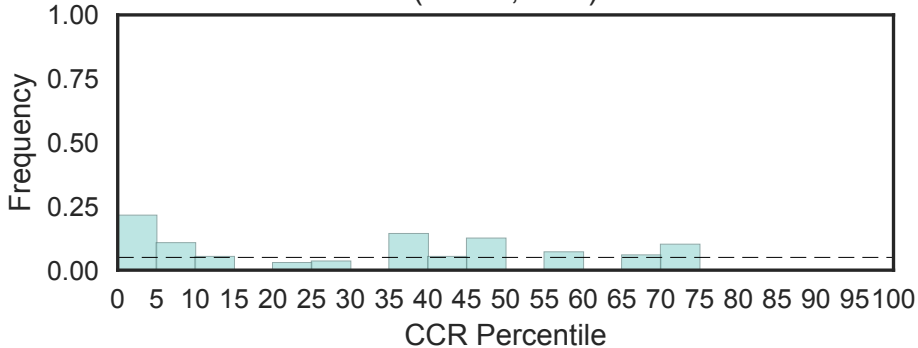

# DNA replication factor Dna2 (Dna2, N=1)

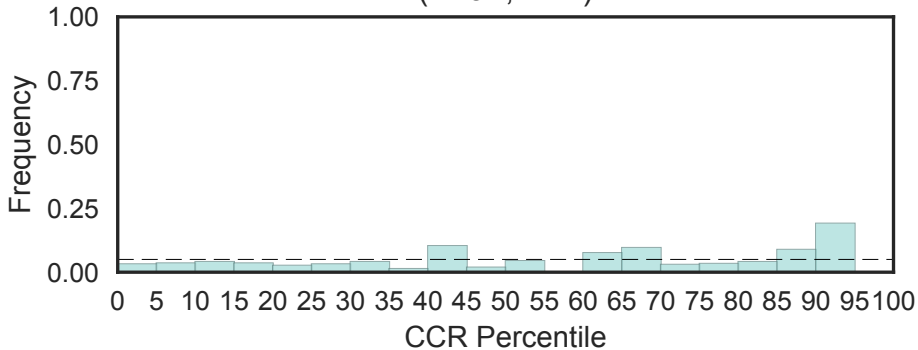

DnaB-like helicase C terminal domain  
(DnaB\_C, N=5)

Fisher's OR: 0; Bonferroni p-val: 1

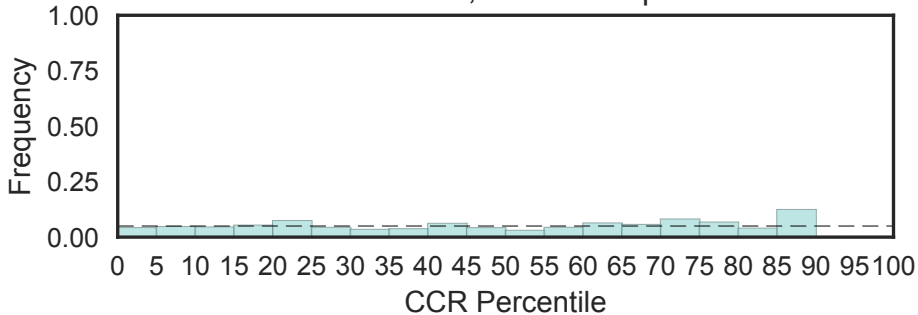

DnaJ domain  
(DnaJ, N=49)

Fisher's OR: 0.958; Bonferroni p-val: 1

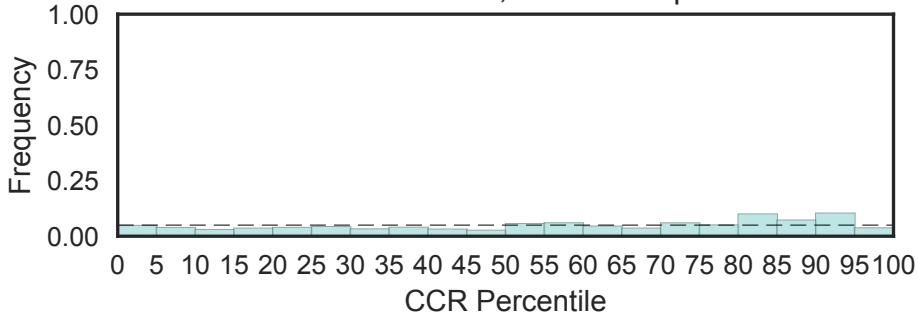

DnaJ C terminal domain  
(DnaJ\_C, N=10)

Fisher's OR: 0.779; Bonferroni p-val: 1

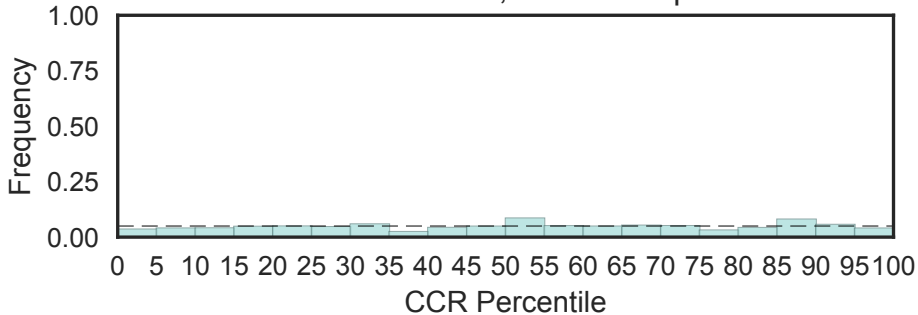



DnaJ central domain  
(DnaJ\_CXXCXGXXG, N=4)  
Fisher's OR: 2.28; Bonferroni p-val: 1

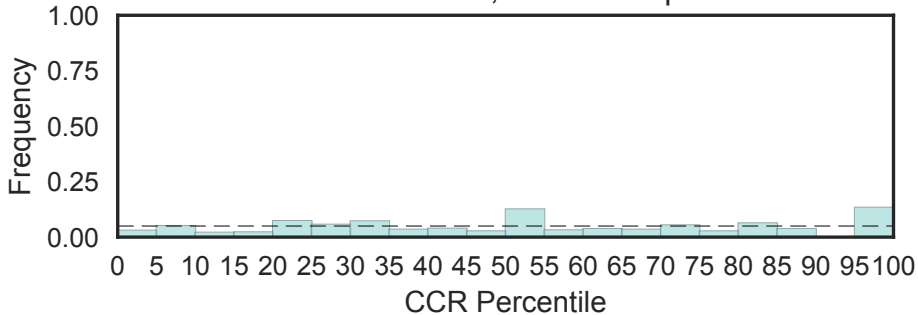

Dopey, N-terminal  
(Dopey\_N, N=2)

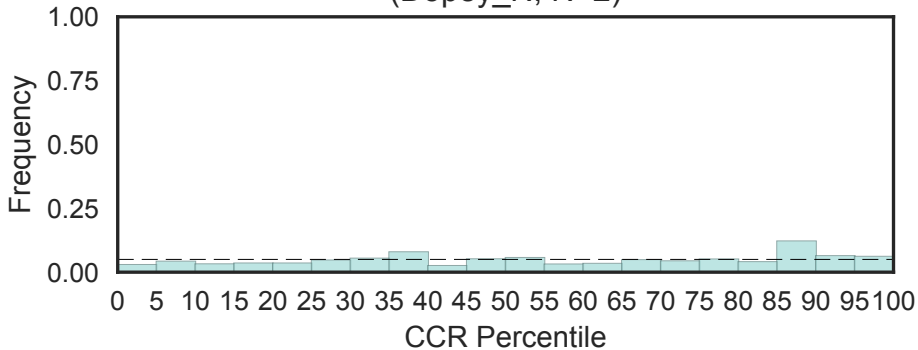

Prion-like protein Doppel  
(Doppel, N=1)

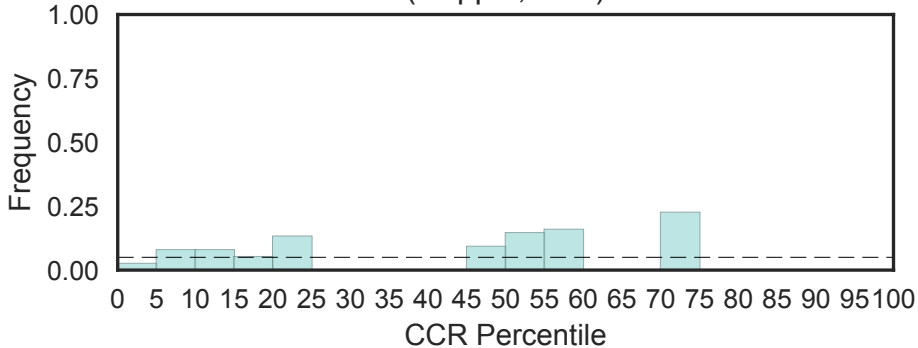

Dor1-like family  
(Dor1, N=4)

Fisher's OR: 0; Bonferroni p-val: 1

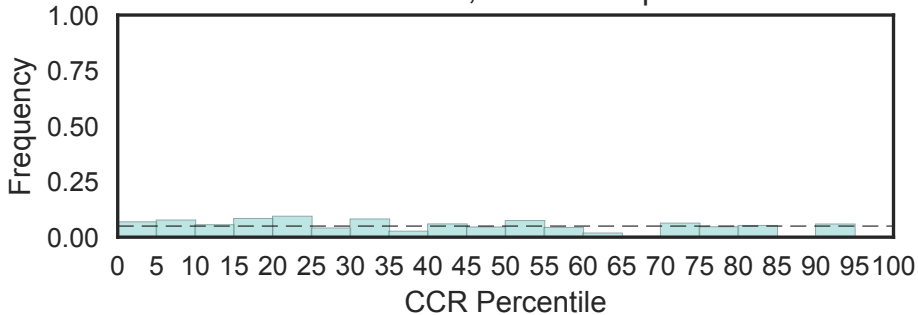

DoxX  
(DoxX, N=2)

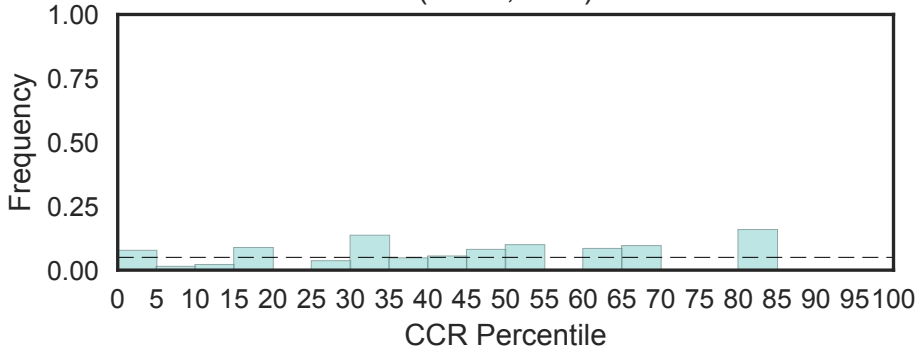

DoxX-like family  
(DoxX\_2, N=2)

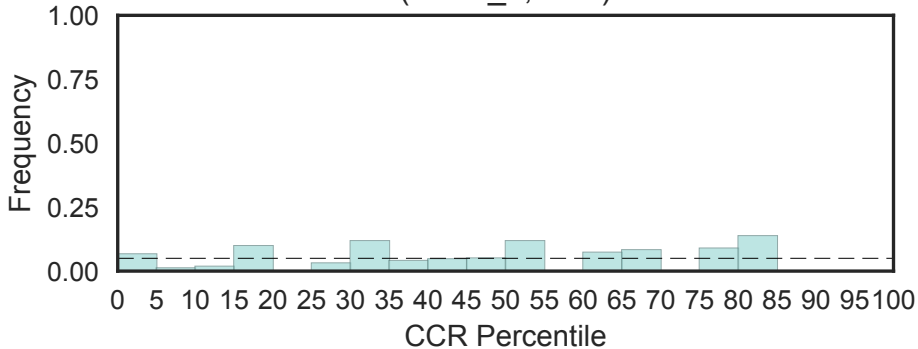

DNA polymerases epsilon N terminal  
(Dpoe2NT, N=1)

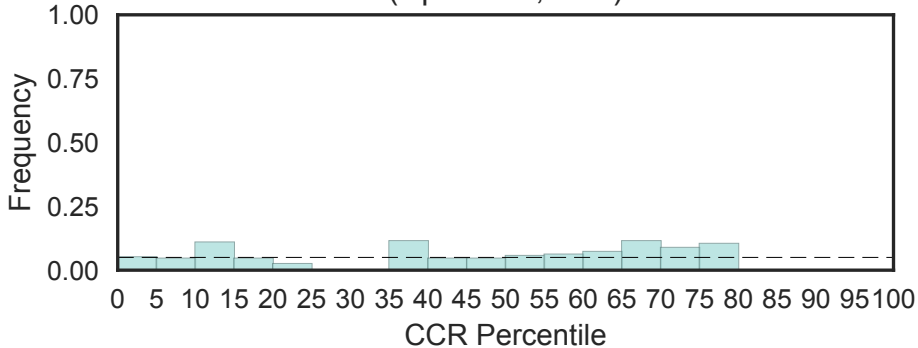

Dppa2/4 conserved region in higher vertebrates  
(Dppa2\_A, N=4)

Fisher's OR: 1.2; Bonferroni p-val: 1

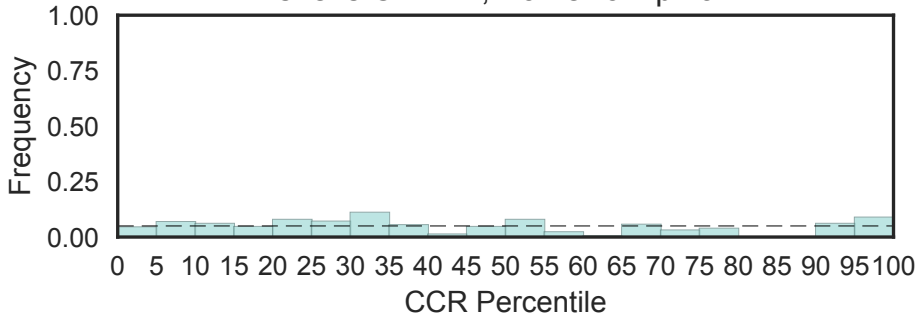



Dpy-30 motif  
(Dpy-30, N=5)

Fisher's OR: 1.5; Bonferroni p-val: 1

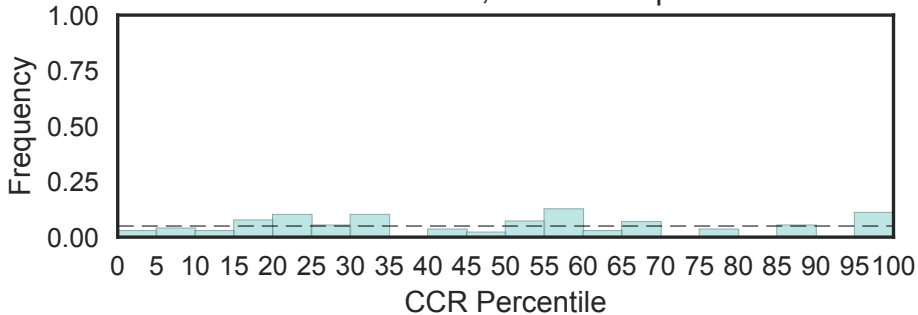

Q-cell neuroblast polarisation  
(Dpy19, N=4)

Fisher's OR: 0.214; Bonferroni p-val: 1

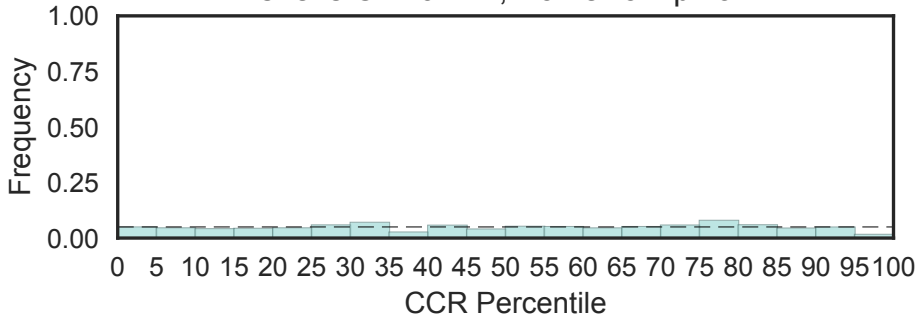

# Draxin (Draxin, N=1)

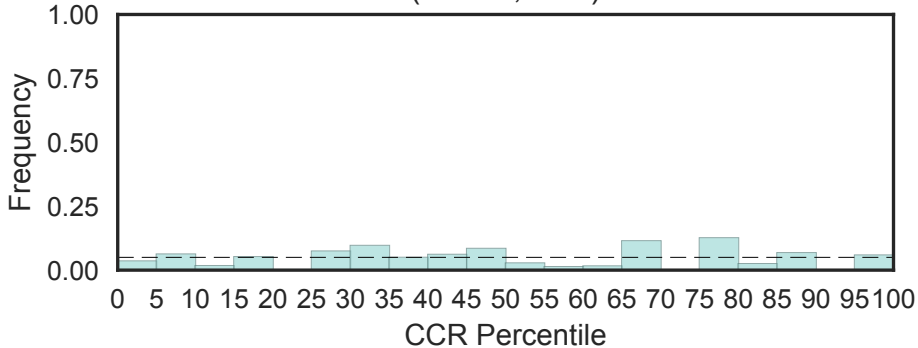

DNA replication and checkpoint protein  
(Drc1-Sld2, N=1)

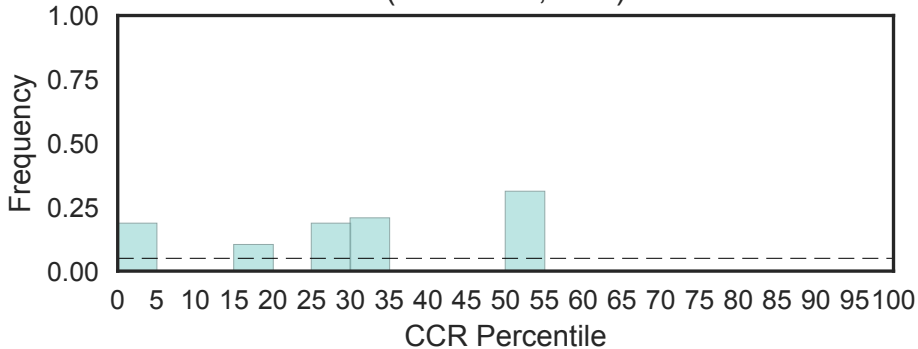

# DRF Autoregulatory Domain (Drf\_DAD, N=2)

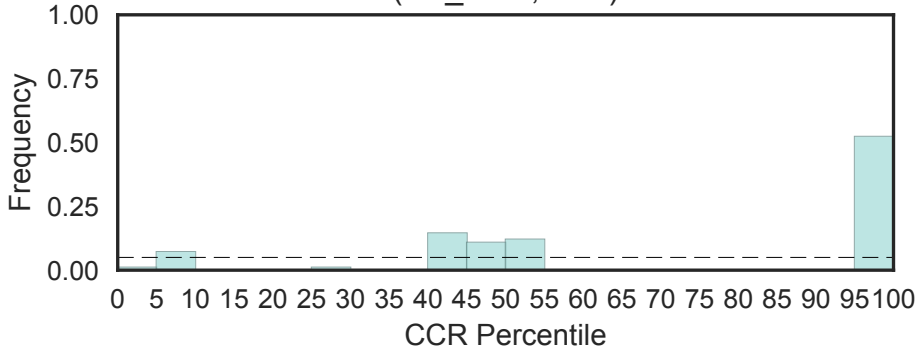

Formin Homology Region 1  
(Drf\_FH1, N=3)

Fisher's OR: 0; Bonferroni p-val: 1

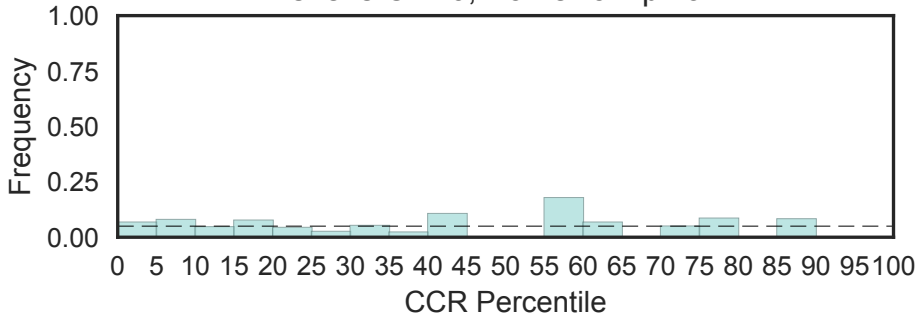

# Diaphanous FH3 Domain

(Drf\_FH3, N=8)

Fisher's OR: 1.58; Bonferroni p-val: 1

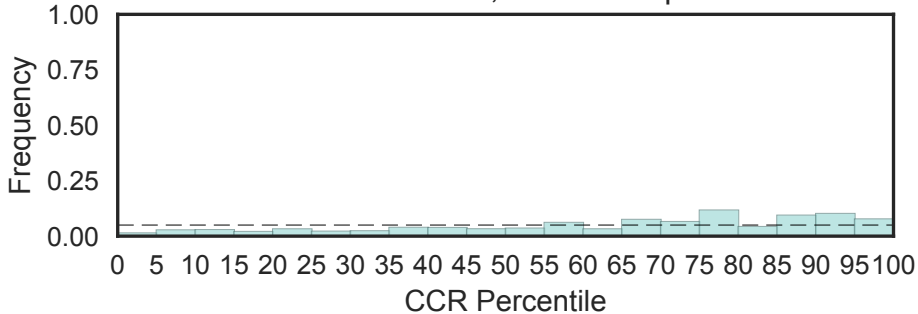

Diaphanous GTPase-binding Domain  
(Drf\_GBD, N=11)

Fisher's OR: 3.31; Bonferroni p-val: 1

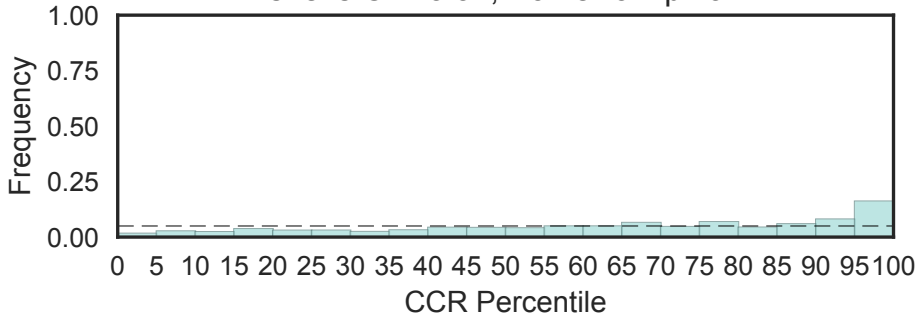



Segment polarity protein dishevelled (Dsh) C terminal  
(Dsh\_C, N=3)

Fisher's OR: 0.965; Bonferroni p-val: 1

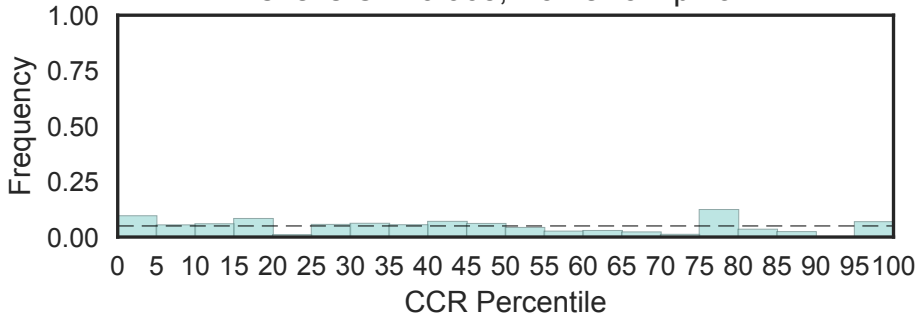

Dual oxidase maturation factor  
(DuoxA, N=3)

Fisher's OR: 0; Bonferroni p-val: 1

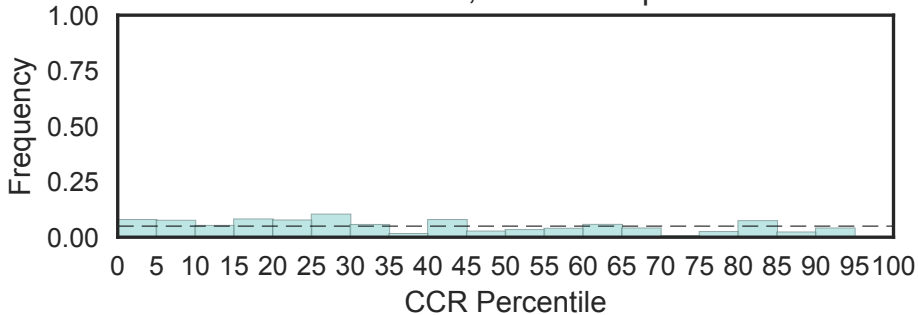

Dihydrouridine synthase (Dus)  
(Dus, N=5)

Fisher's OR: 0; Bonferroni p-val: 1

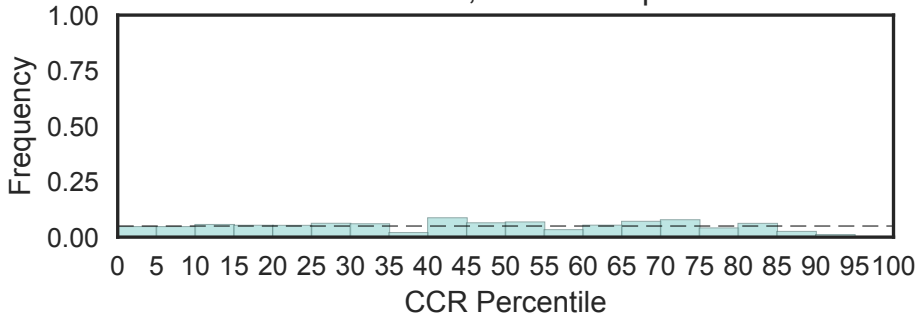

Dyggve-Melchior-Clausen syndrome protein  
(Dymeclin, N=3)

Fisher's OR: 0.654; Bonferroni p-val: 1

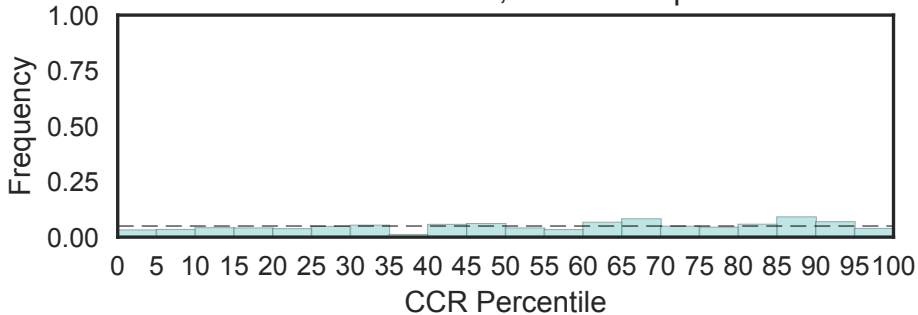

Dynein associated protein  
(Dynactin, N=1)

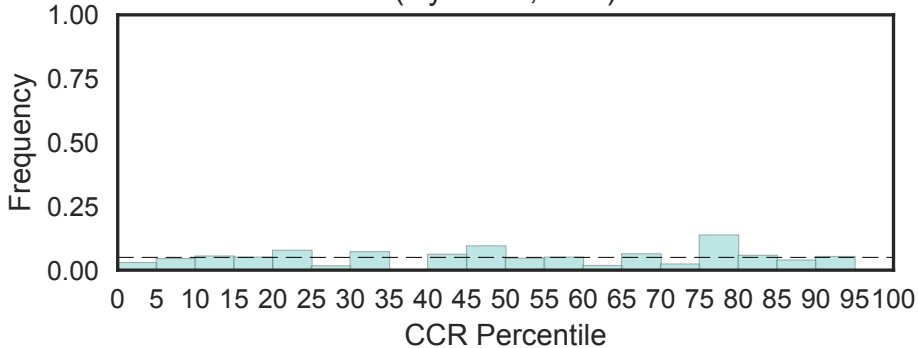

Dynactin subunit p22  
(Dynactin\_p22, N=1)

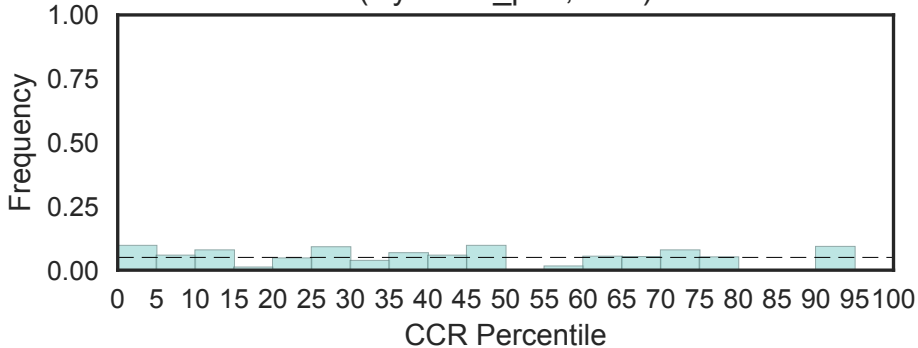

Dynactin p62 family  
(Dynactin\_p62, N=2)

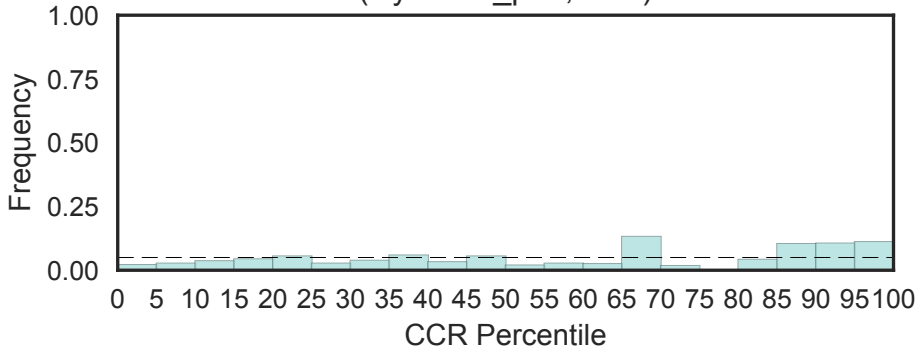

Dynamin central region  
(Dynamin\_M, N=6)

Fisher's OR: 3.33; Bonferroni p-val: 0.179

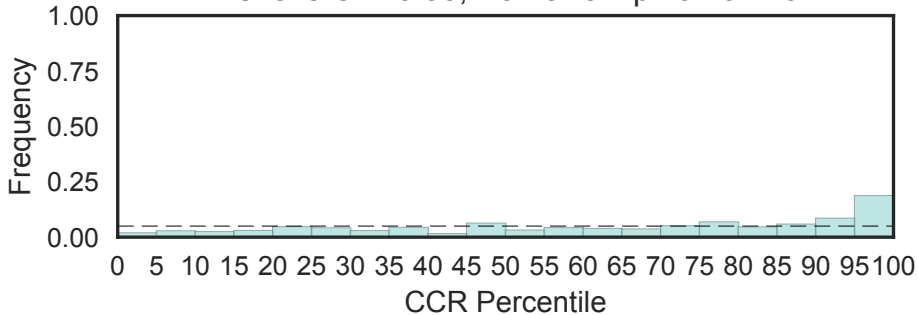



Dynamain family  
(Dynamain\_N, N=16)

Fisher's OR: 1.74; Bonferroni p-val: 1

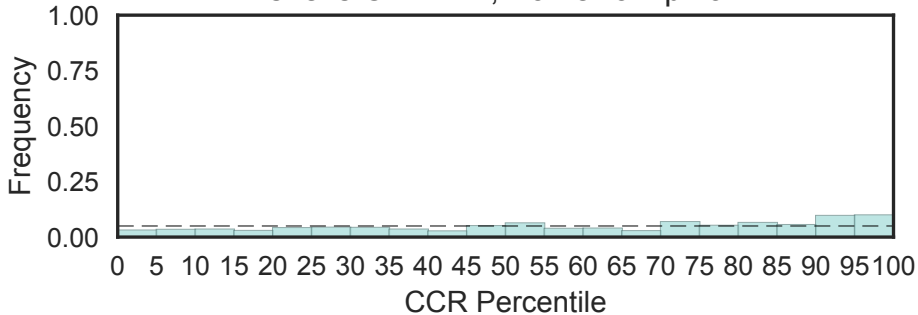

# Dynamitin

(Dynamitin, N=1)

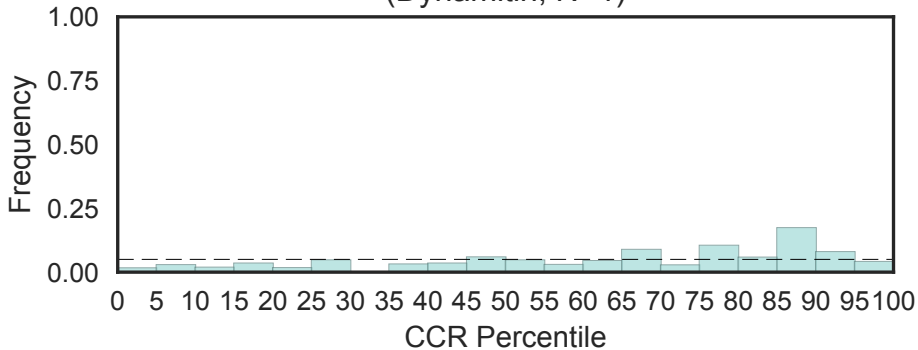

Cytoplasmic dynein 1 intermediate chain 2  
(Dynein\_IC2, N=2)

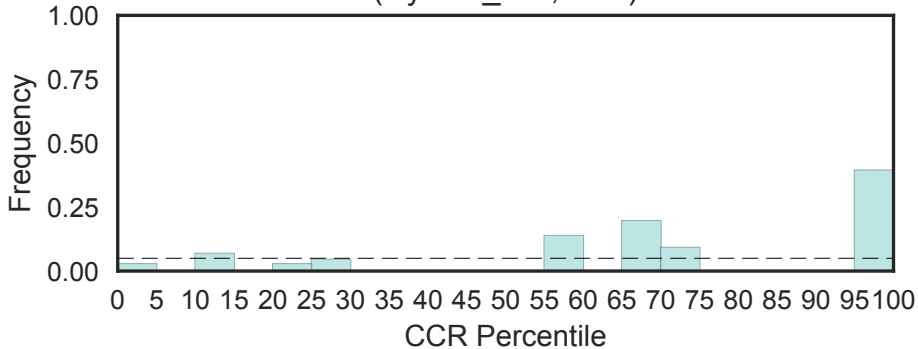

Dynein attachment factor N-terminus  
(Dynein\_attach\_N, N=1)

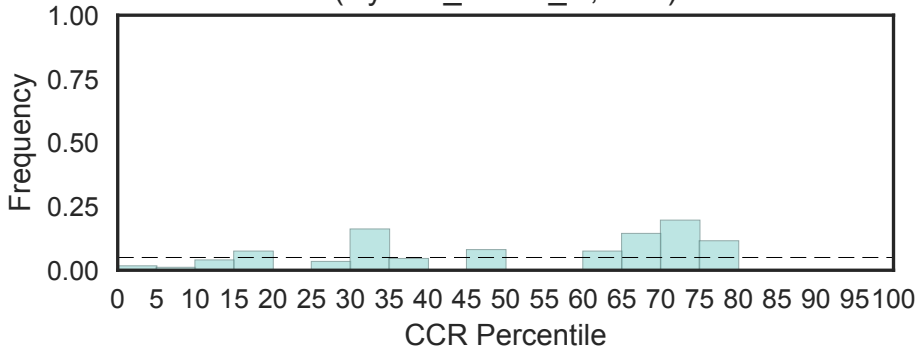

Dynein heavy chain and region D6 of dynein motor  
(Dynein\_heavy, N=18)

Fisher's OR: 0.363; Bonferroni p-val: 0.00358

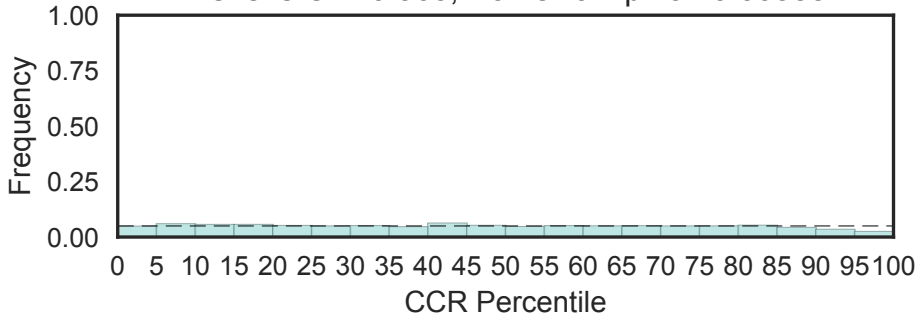

Dynein light chain type 1  
(Dynein\_light, N=3)

Fisher's OR: 4.7; Bonferroni p-val: 1

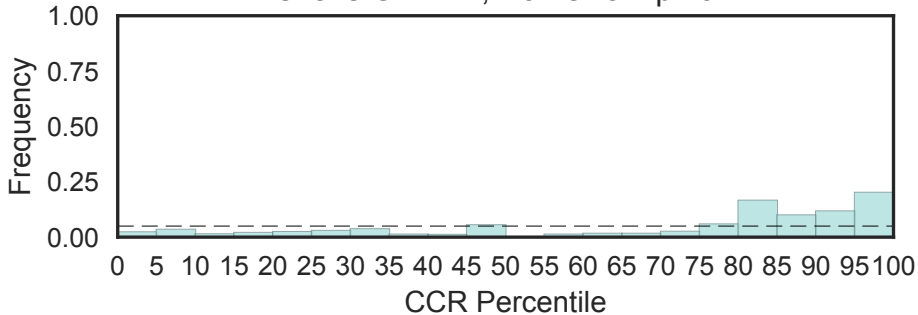

Dysbindin (Dystrobrevin binding protein 1)  
(Dysbindin, N=3)

Fisher's OR: 0.546; Bonferroni p-val: 1

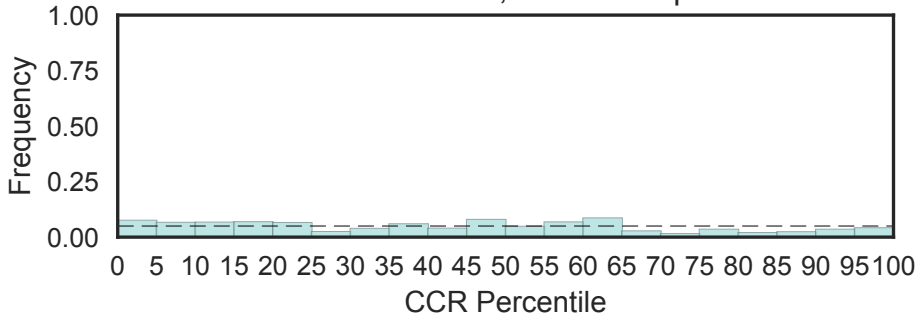

Iguana/Dzip1-like DAZ-interacting protein N-terminal  
(Dzip-like\_N, N=2)

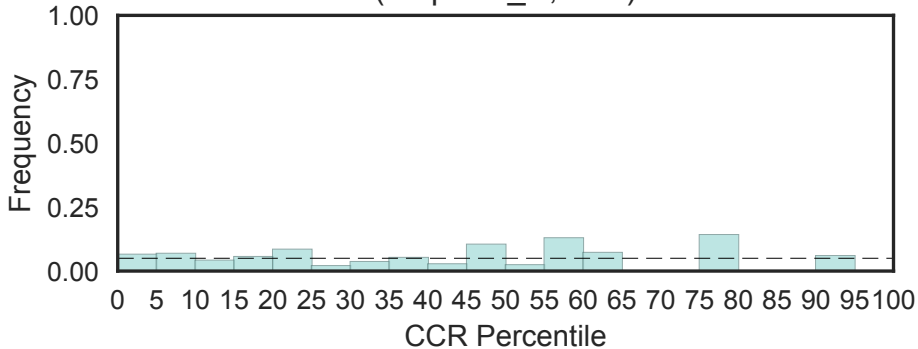



E1-E2 ATPase  
(E1-E2\_ATPase, N=33)  
Fisher's OR: 1.79; Bonferroni p-val: 1

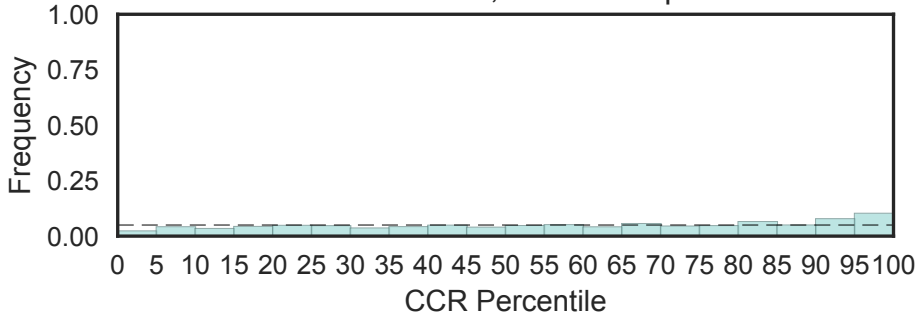

Ubiquitin-activating enzyme E1 four-helix bundle  
(E1\_4HB, N=2)

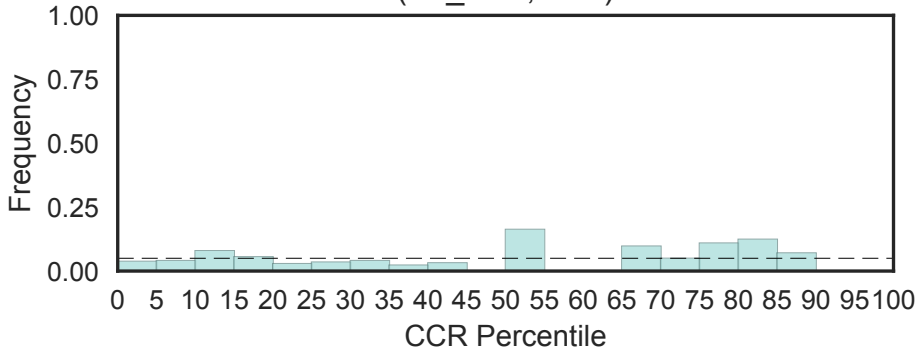

ML domain  
(E1\_DerP2\_DerF2, N=4)  
Fisher's OR: 0.498; Bonferroni p-val: 1

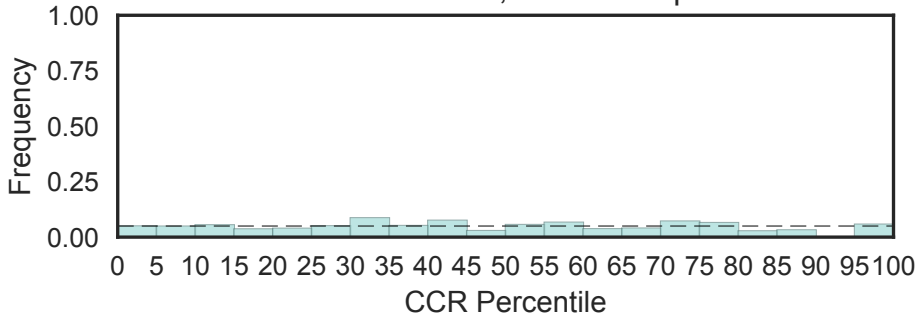

Ubiquitin-activating enzyme E1 FCCH domain  
(E1\_FCCH, N=2)

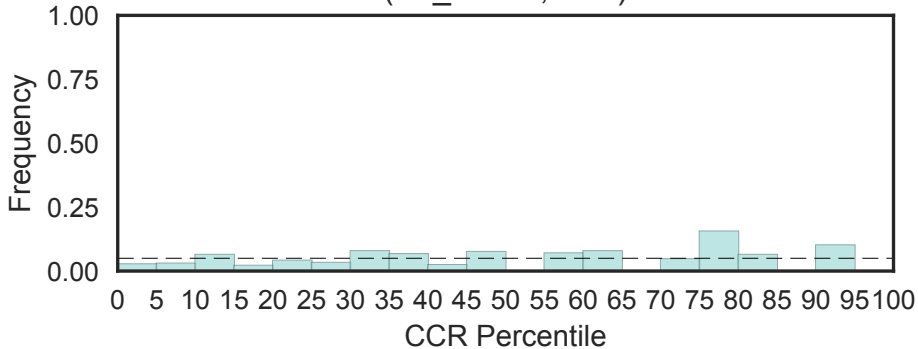

Ubiquitin fold domain  
(E1\_UFD, N=2)

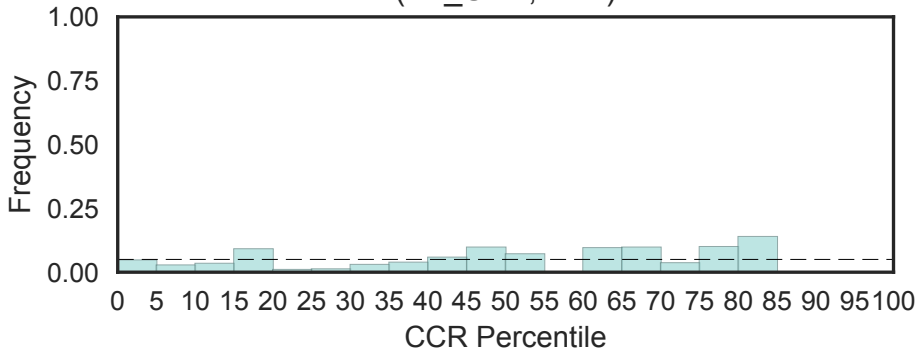

Dehydrogenase E1 component  
(E1\_dh, N=8)

Fisher's OR: 1.29; Bonferroni p-val: 1

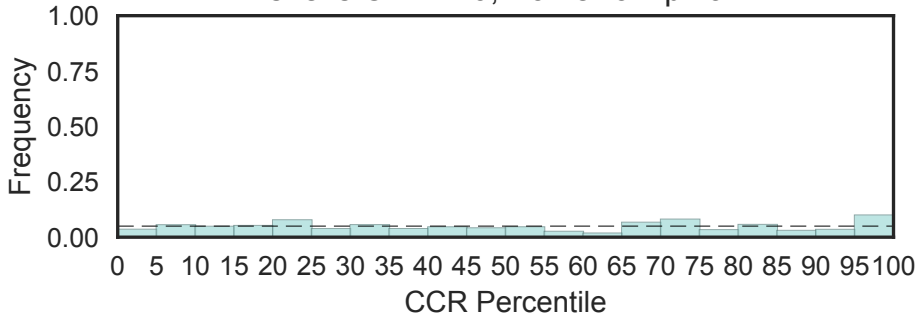

E2F transcription factor CC-MB domain  
(E2F\_CC-MB, N=6)

Fisher's OR: 0.594; Bonferroni p-val: 1

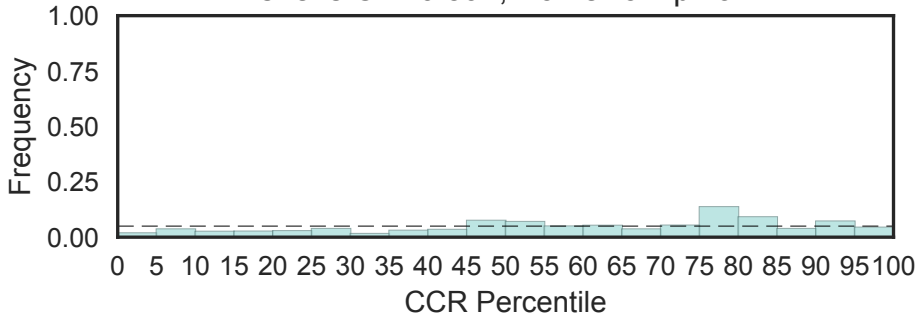

E2F/DP family winged-helix DNA-binding domain  
(E2F\_TDP, N=12)

Fisher's OR: 6.22; Bonferroni p-val: 0.0569

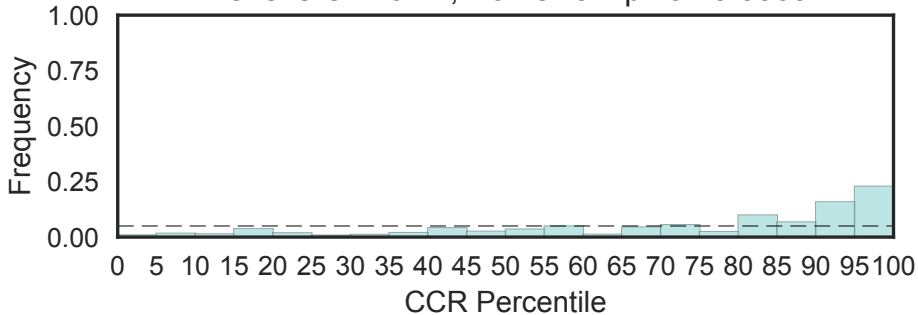



E2 binding domain  
(E2\_bind, N=1)

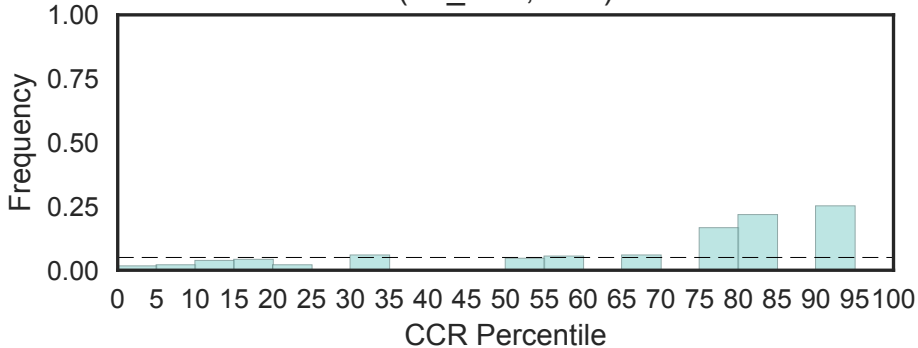

E3 UFM1-protein ligase 1  
(E3\_UFM1\_ligase, N=1)

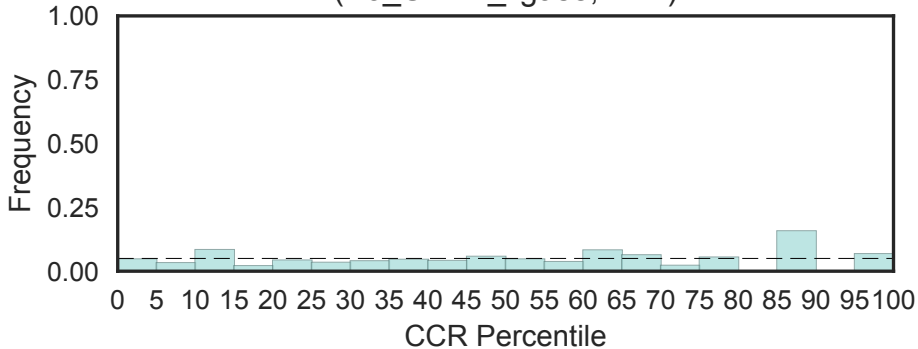

E3 ubiquitin ligase EDD  
(E3\_UbLigase\_EDD, N=1)

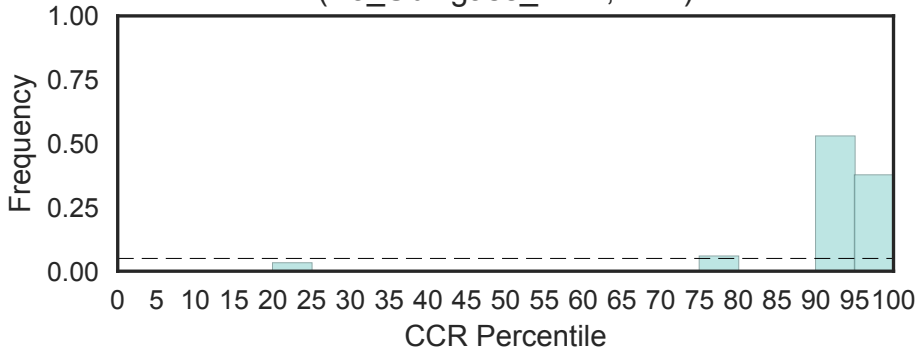

E3 ubiquitin-protein ligase UBR4  
(E3\_UbLigase\_R4, N=3)  
Fisher's OR: 1.73; Bonferroni p-val: 1

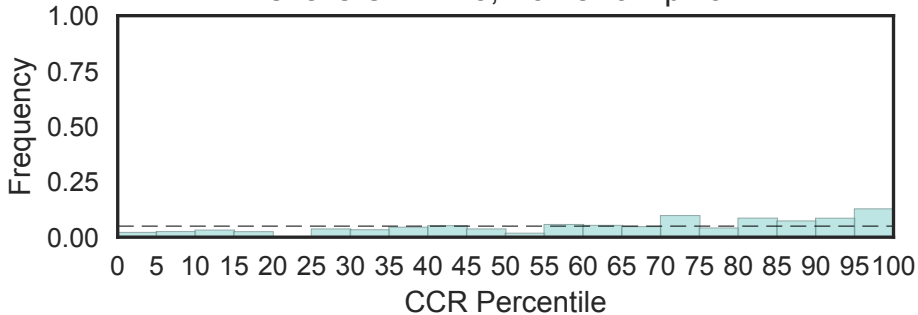

e3 binding domain  
(E3\_binding, N=3)

Fisher's OR: 0; Bonferroni p-val: 1

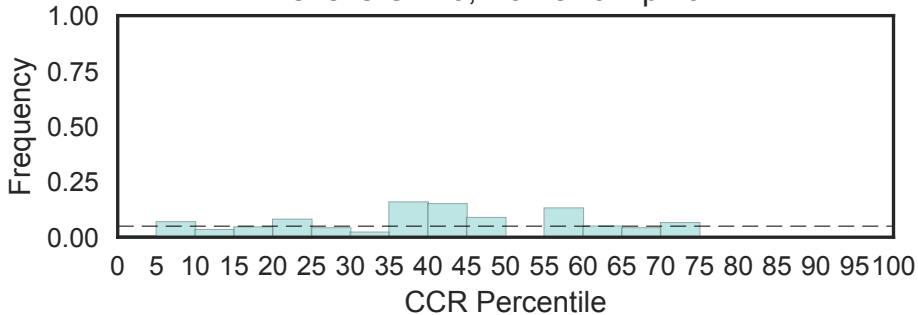

TSG101 and ALIX binding domain of CEP55  
(EABR, N=2)

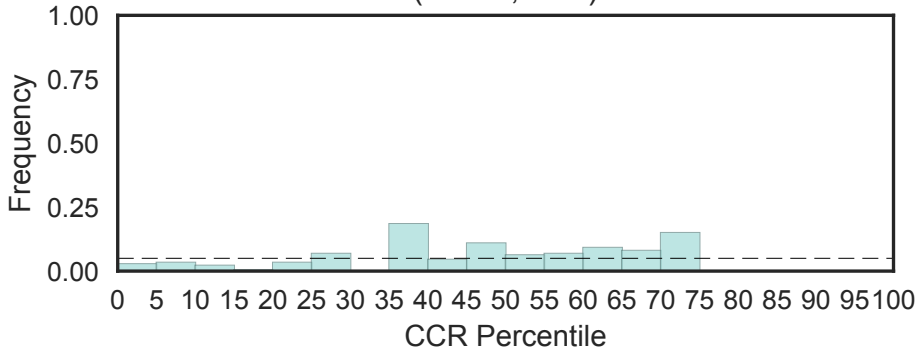

# RNA polymerase II transcription elongation factor (EAF, N=2)

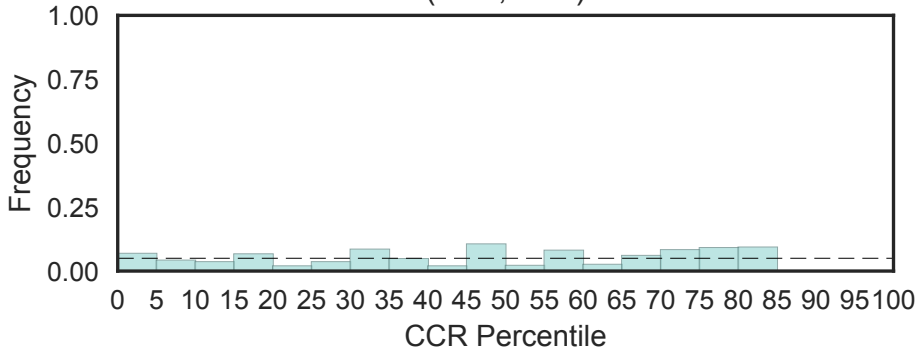

EAP30/Vps36 family  
(EAP30, N=2)

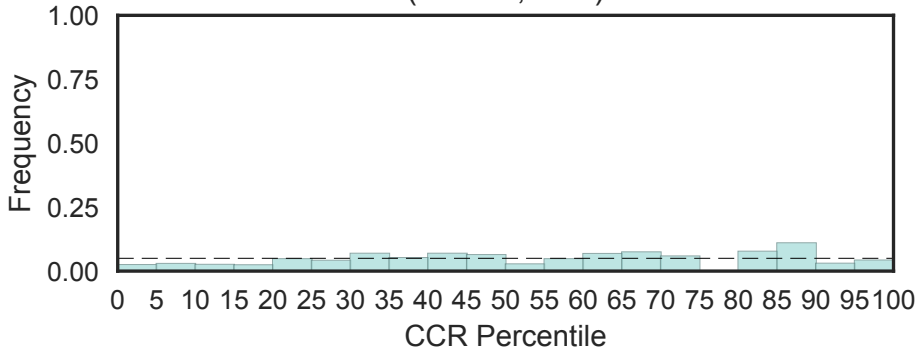



EB1-like C-terminal motif  
(EB1, N=3)

Fisher's OR: 4.16; Bonferroni p-val: 1

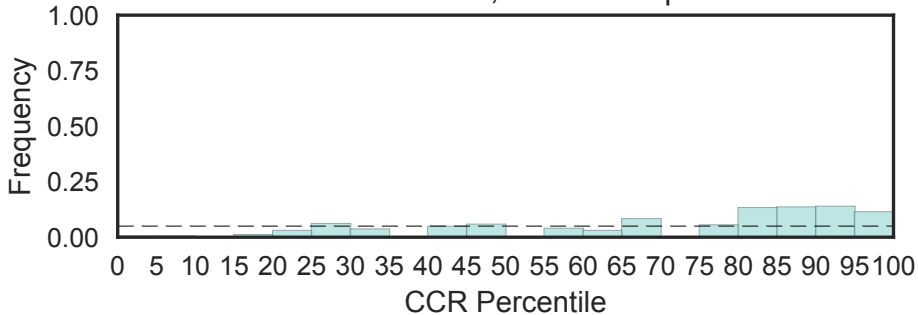

EB-1 Binding Domain  
(EB1\_binding, N=1)

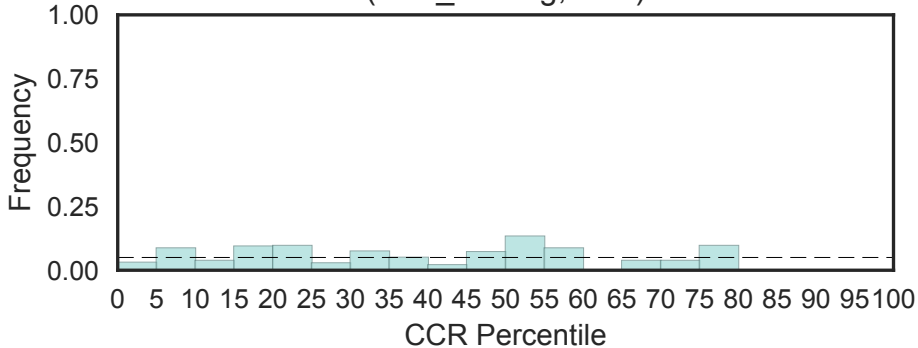

# Emopamil binding protein (EBP, N=1)

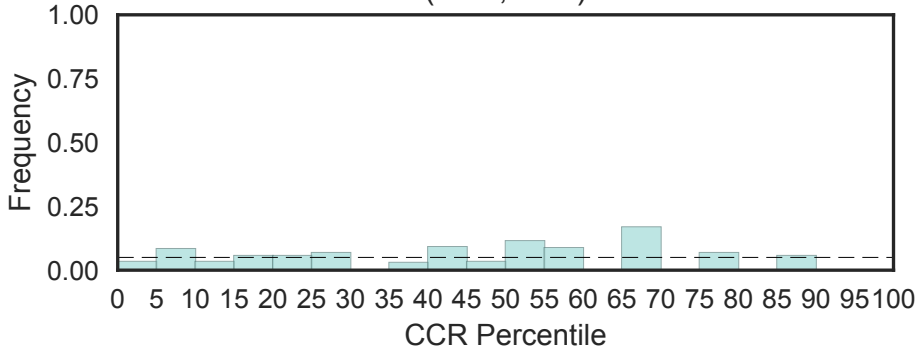

EBP50, C-terminal  
(EBP50\_C, N=3)  
Fisher's OR: 0; Bonferroni p-val: 1

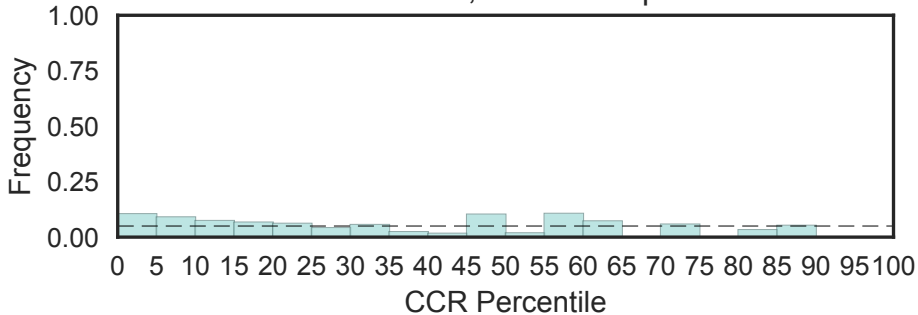

Enoyl-CoA hydratase/isomerase  
(ECH\_1, N=16)

Fisher's OR: 0.349; Bonferroni p-val: 1

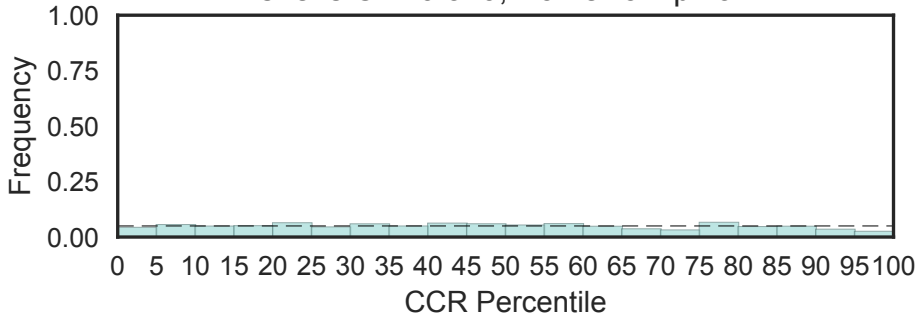

Enoyl-CoA hydratase/isomerase  
(ECH\_2, N=15)

Fisher's OR: 0.386; Bonferroni p-val: 1

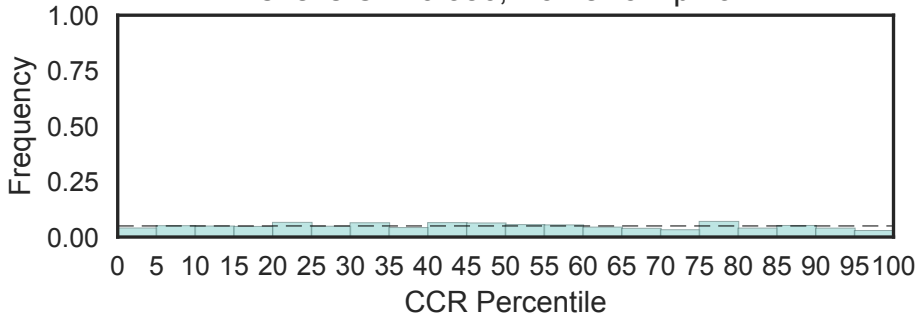

# Extracellular matrix protein 1 (ECM1) (ECM1, N=1)

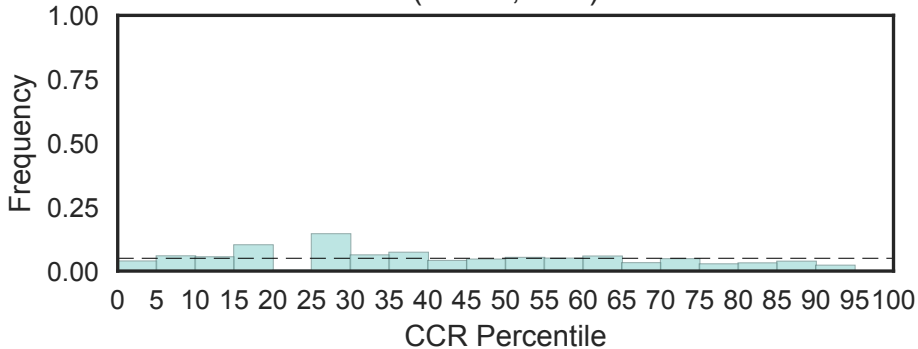

Exosome complex exonuclease RRP4 N-terminal region  
(ECR1\_N, N=2)

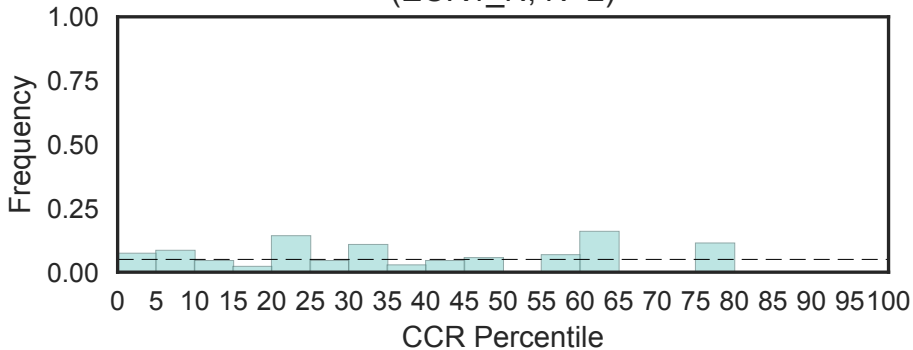



Endothelial cell-specific chemotaxis regulator  
(ECSCR, N=1)

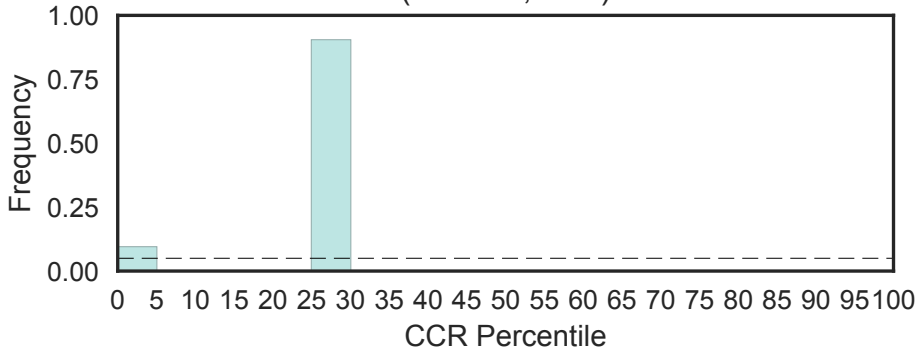

# Evolutionarily conserved signalling intermediate in Toll pathway (ECSIT, N=1)

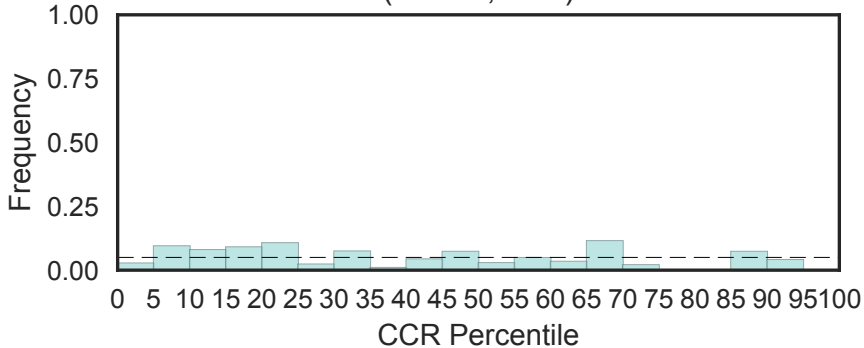

C-terminal domain of the ECSIT protein  
(ECSIT\_C, N=1)

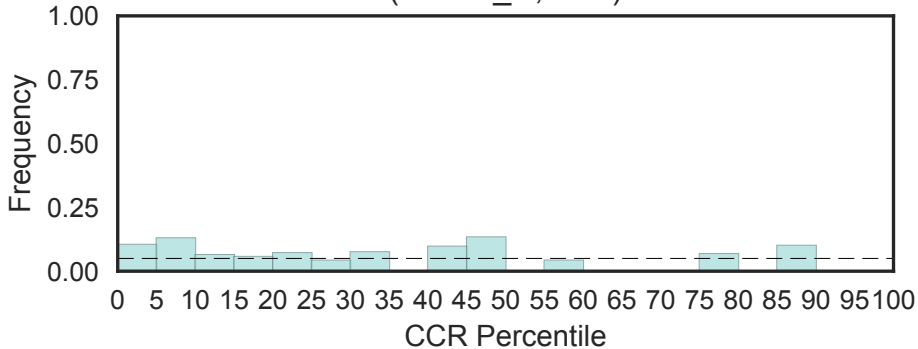

# Ethylene-responsive protein kinase Le-CTR1 (EDR1, N=1)

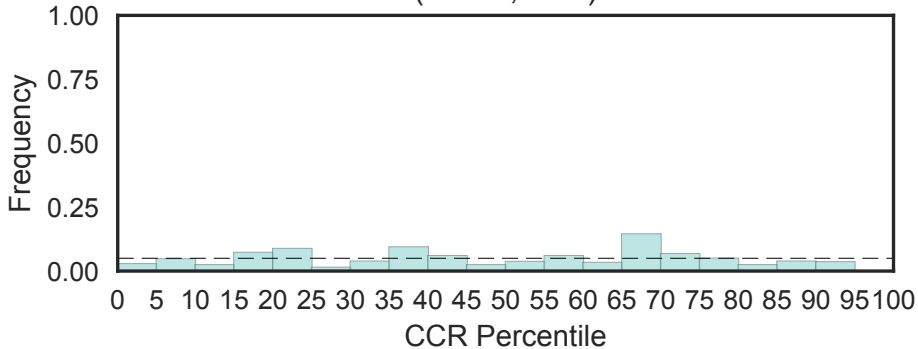

Eukaryotic elongation factor 1 beta central acidic region  
(EF-1\_beta\_acid, N=2)

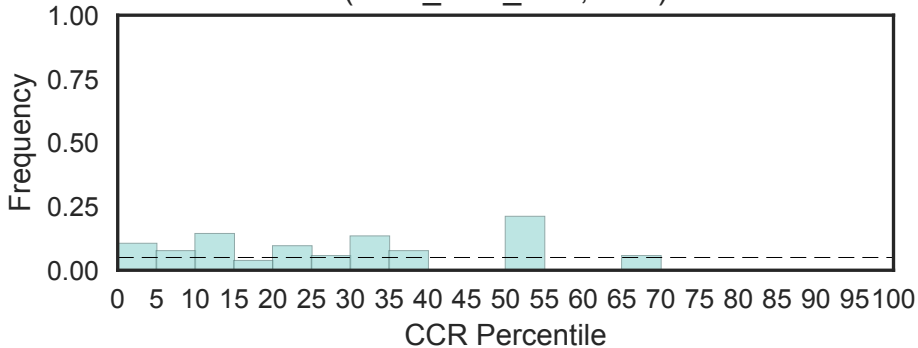

# EF hand

(EF-hand\_1, N=115)

Fisher's OR: 2.67; Bonferroni p-val: 0.0798

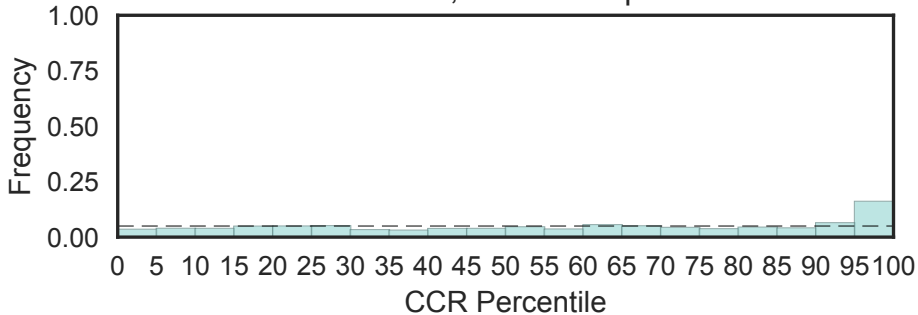

EF hand  
(EF-hand\_10, N=3)  
Fisher's OR: 0; Bonferroni p-val: 1

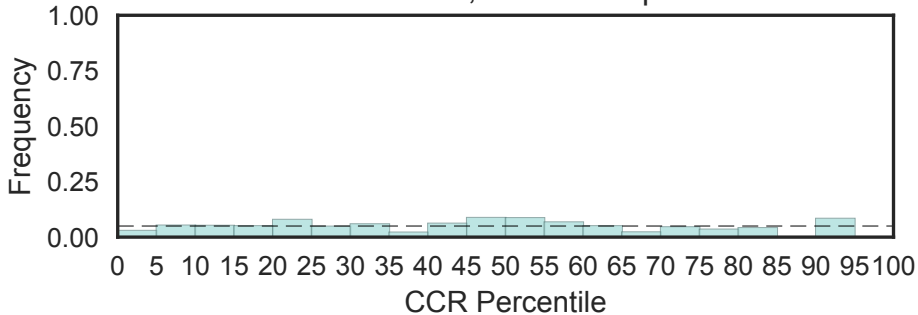

EF-hand domain  
(EF-hand\_11, N=4)  
Fisher's OR: 0.948; Bonferroni p-val: 1

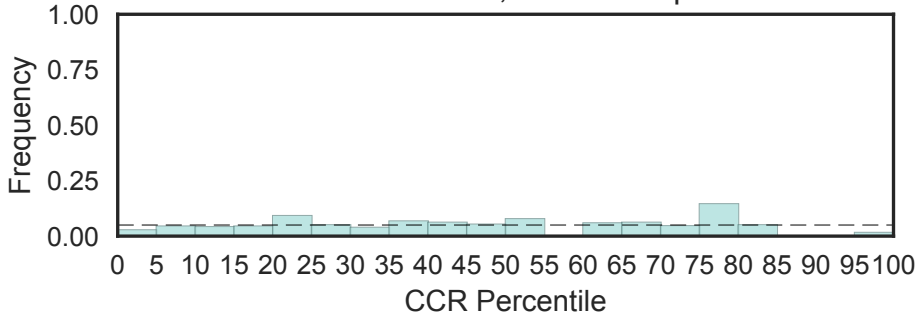



EF hand  
(EF-hand\_2, N=4)  
Fisher's OR: 0.597; Bonferroni p-val: 1

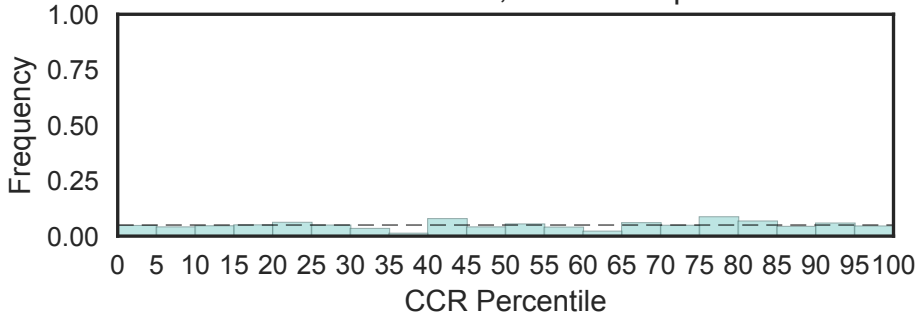

EF-hand  
(EF-hand\_3, N=4)  
Fisher's OR: 0; Bonferroni p-val: 1

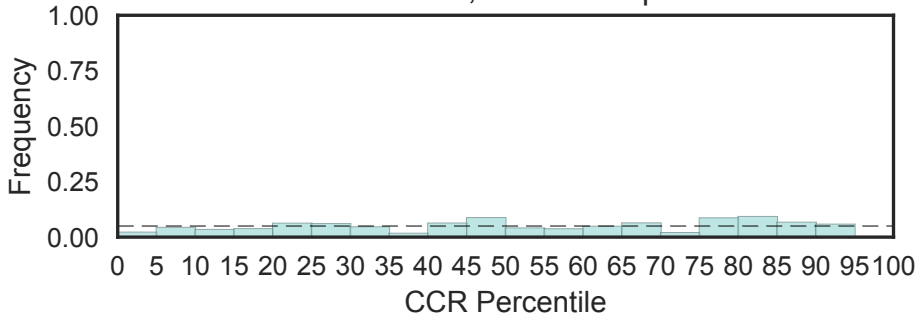

Cytoskeletal-regulatory complex EF hand  
(EF-hand\_4, N=18)

Fisher's OR: 1.57; Bonferroni p-val: 1

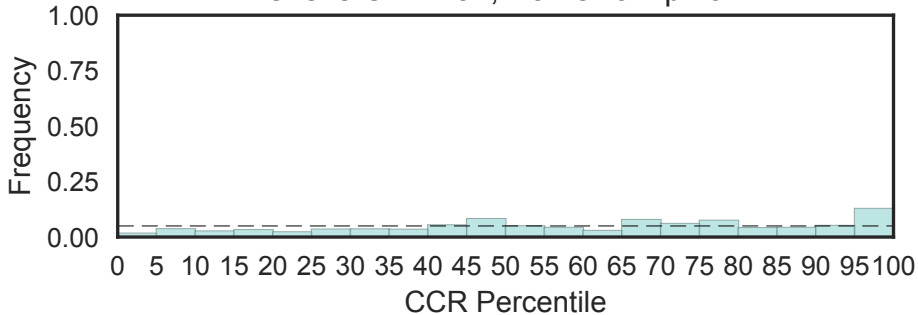

EF hand  
(EF-hand\_5, N=255)  
Fisher's OR: 1.76; Bonferroni p-val: 1

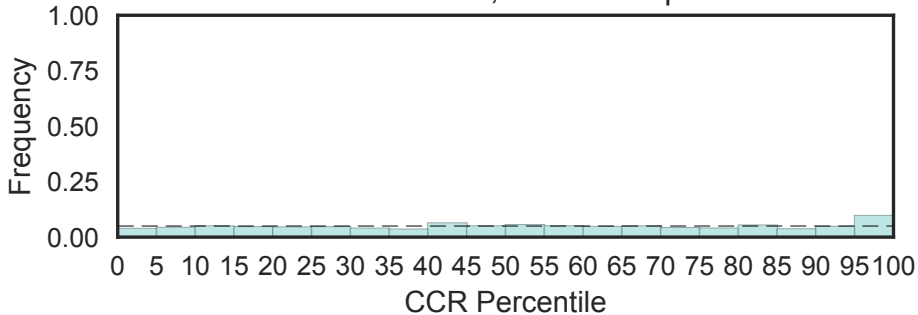

EF-hand domain  
(EF-hand\_6, N=86)  
Fisher's OR: 2.48; Bonferroni p-val: 1

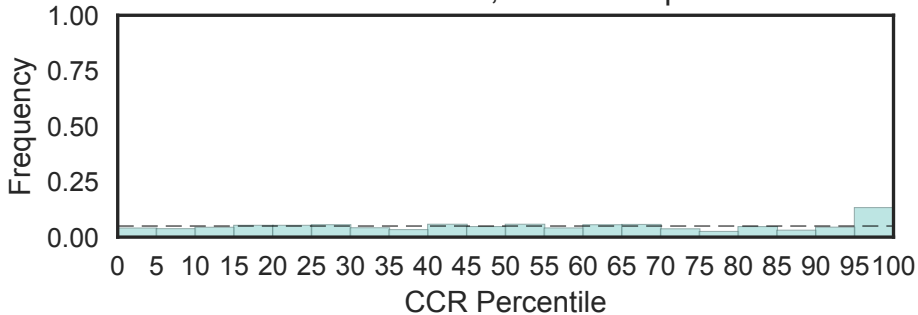

EF-hand domain pair  
(EF-hand\_7, N=113)

Fisher's OR: 1.25; Bonferroni p-val: 1

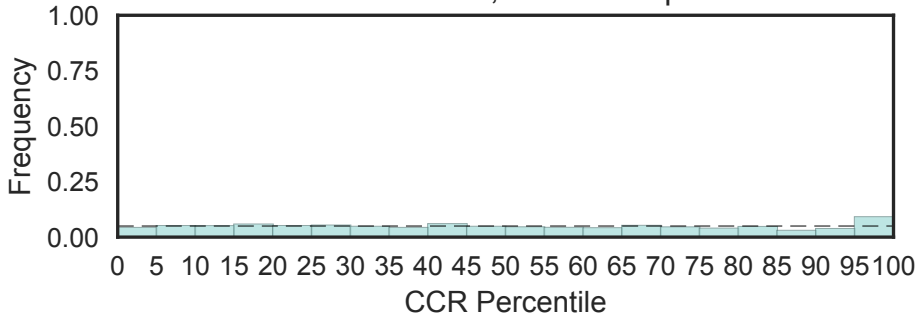

EF-hand domain pair  
(EF-hand\_8, N=189)

Fisher's OR: 1.2; Bonferroni p-val: 1

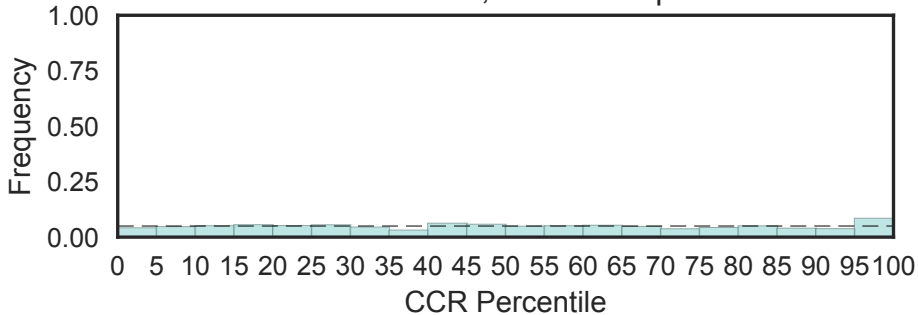

EF-hand domain  
(EF-hand\_9, N=4)

Fisher's OR: 20.9; Bonferroni p-val: 0.00654

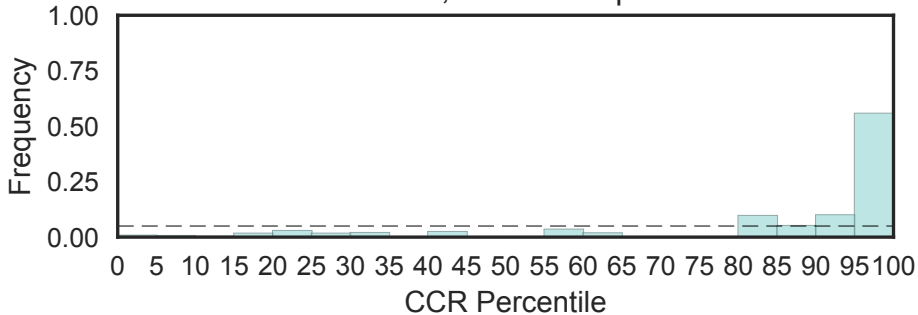



Phosphoinositide-specific phospholipase C, ehand-like  
(EF-hand\_like, N=13)

Fisher's OR: 1.1; Bonferroni p-val: 1

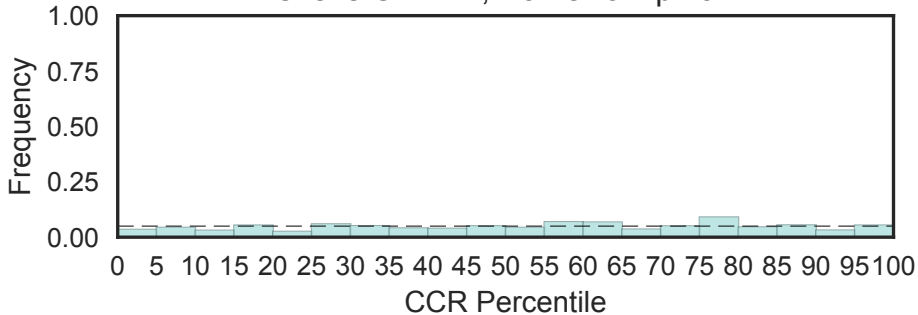

Elongation factor 1 gamma, conserved domain  
(EF1G, N=1)

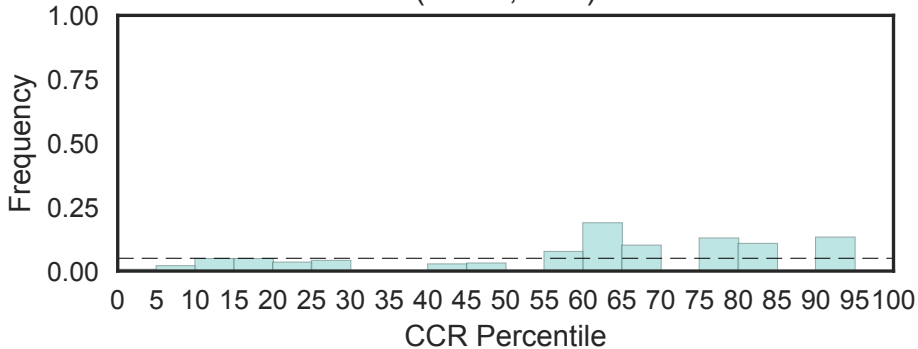

EF-1 guanine nucleotide exchange domain  
(EF1\_GNE, N=2)

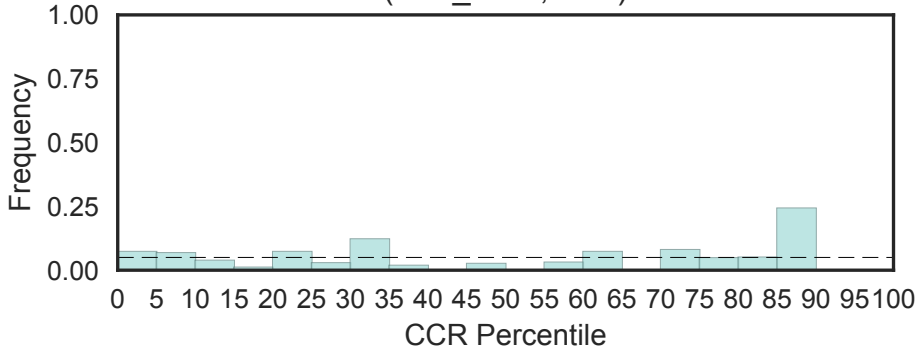

Elongation factor G C-terminus  
(EFG\_C, N=6)

Fisher's OR: 2.83; Bonferroni p-val: 1

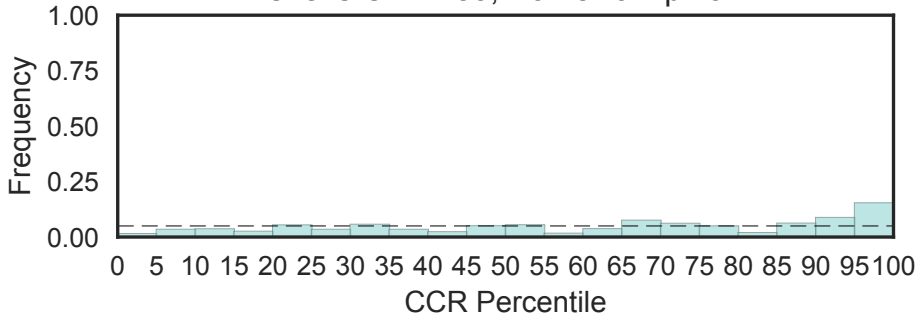

Elongation Factor G, domain II  
(EFG\_II, N=5)

Fisher's OR: 3.38; Bonferroni p-val: 1

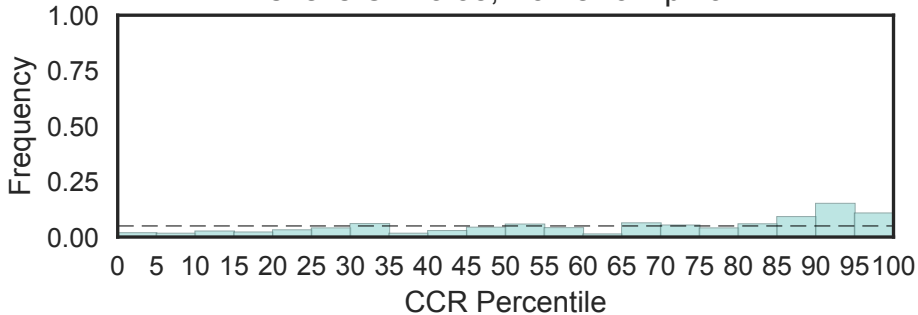

Elongation factor G, domain IV  
(EFG\_IV, N=5)

Fisher's OR: 3.07; Bonferroni p-val: 1

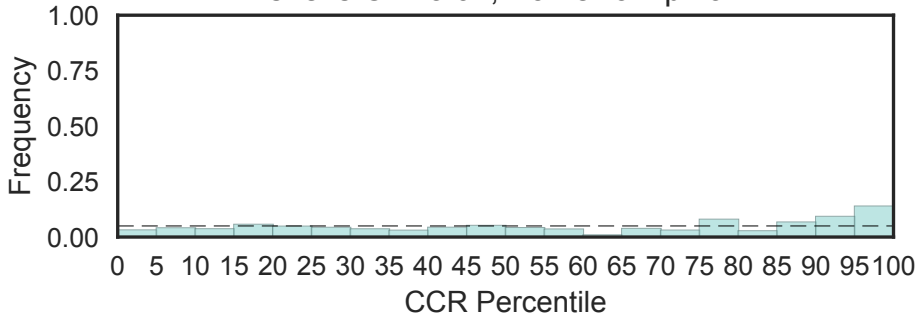

# 116 kDa U5 small nuclear ribonucleoprotein component N-terminus (EFTUD2, N=1)

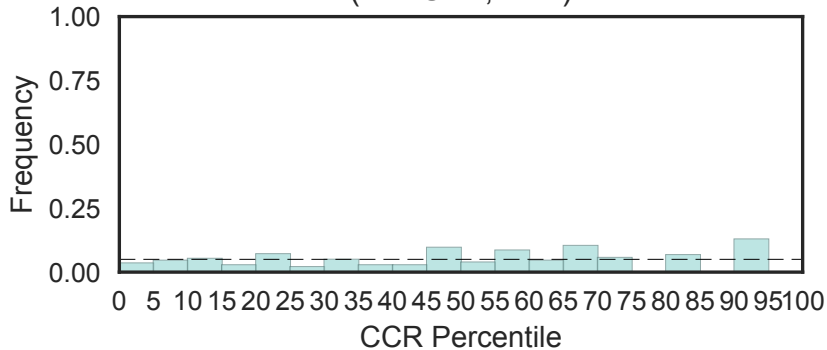

Elongation factor TS  
(EF\_TS, N=1)

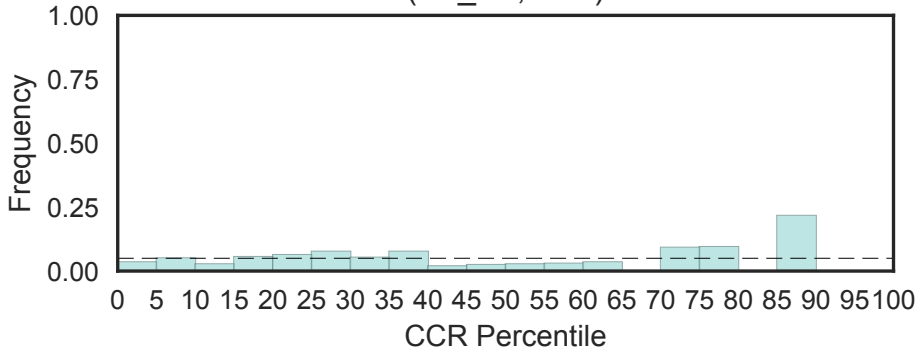



EF hand associated  
(EF\_assoc\_1, N=2)

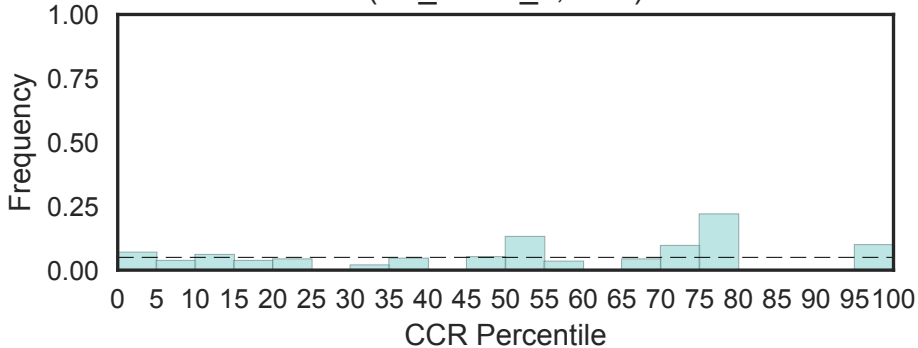

EF hand associated  
(EF\_assoc\_2, N=2)

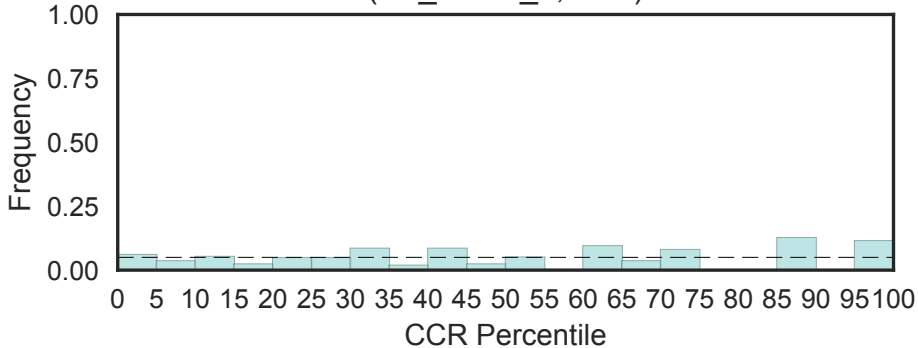

Ca<sup>2+</sup> insensitive EF hand  
(EFhand\_Ca\_insen, N=8)  
Fisher's OR: 2.72; Bonferroni p-val: 1

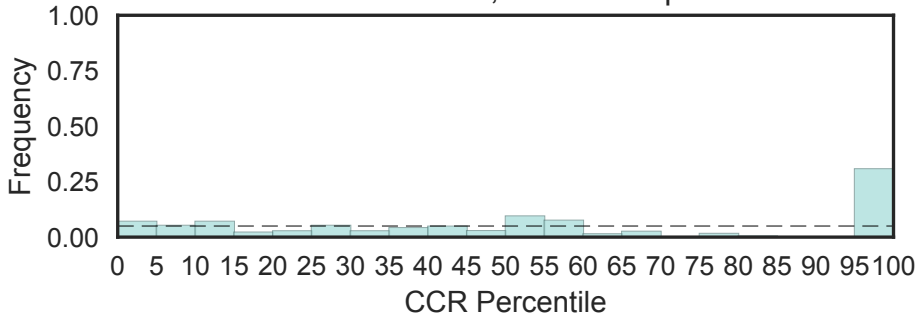

EGF-like domain  
(EGF, N=301)

Fisher's OR: 0.735; Bonferroni p-val: 1

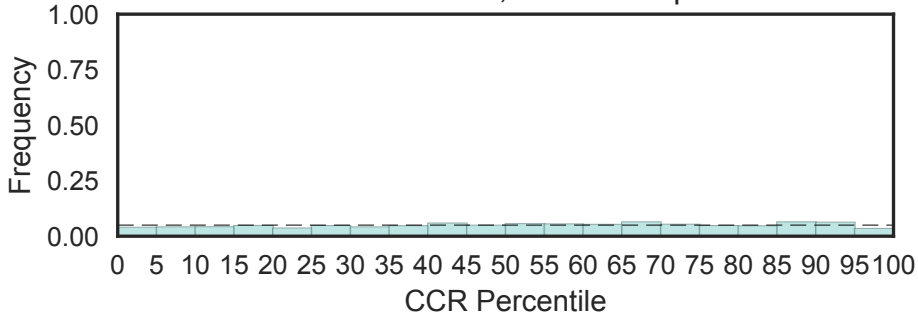

EGF-like domain  
(EGF\_2, N=31)

Fisher's OR: 0.597; Bonferroni p-val: 1

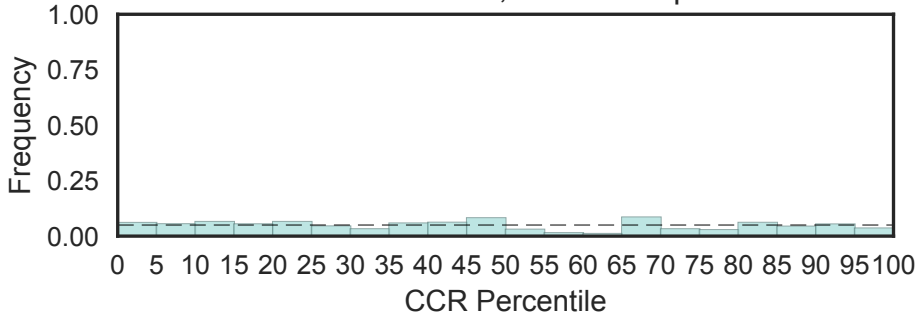

EGF domain  
(EGF\_3, N=31)

Fisher's OR: 0; Bonferroni p-val: 1

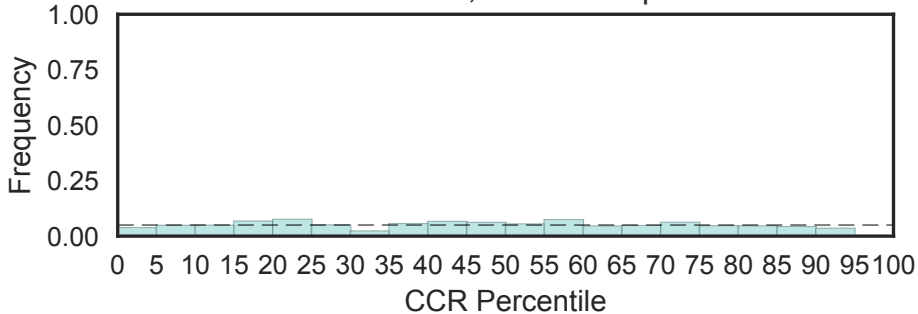

Calcium-binding EGF domain  
(EGF\_CA, N=456)

Fisher's OR: 0.332; Bonferroni p-val: 9.93e-06

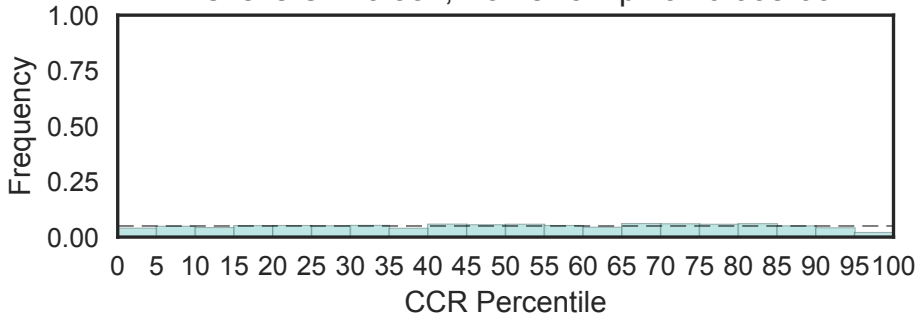

N-terminal EH-domain containing protein  
(EHD\_N, N=5)

Fisher's OR: 0; Bonferroni p-val: 1

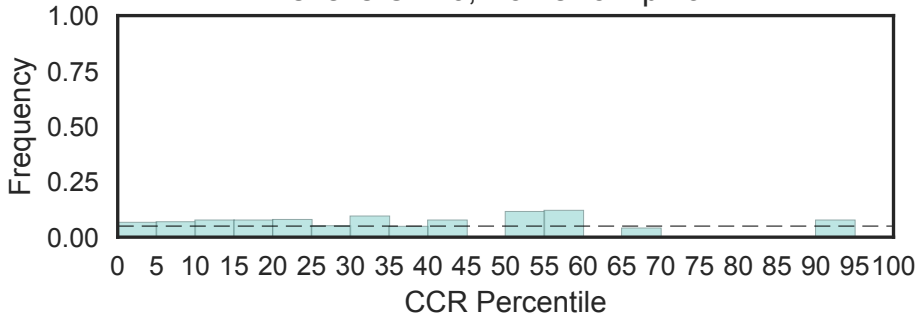



# Epoxide hydrolase N terminus (EHN, N=1)

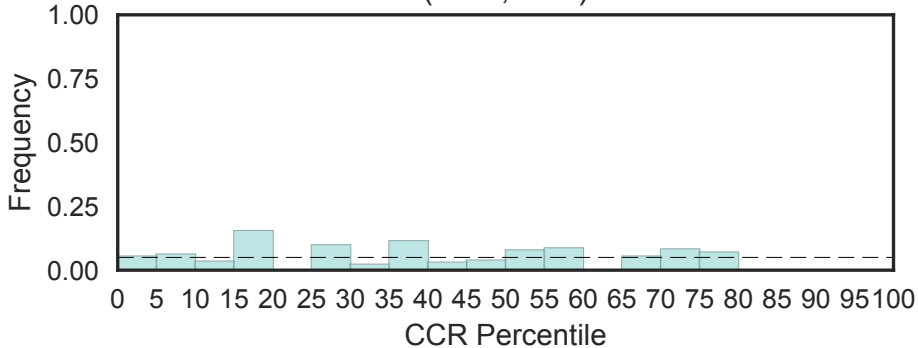

# Etoposide-induced protein 2.4 (EI24) (EI24, N=1)

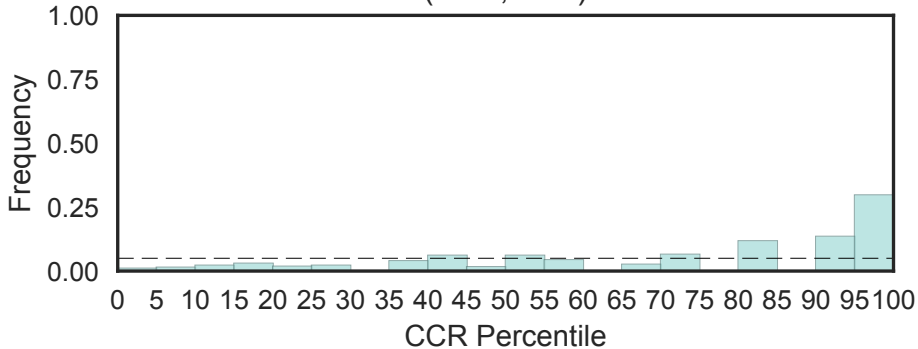

# Nucleocytoplasmic shuttling protein for mRNA cap-binding EIF4E (EIF4E-T, N=2)

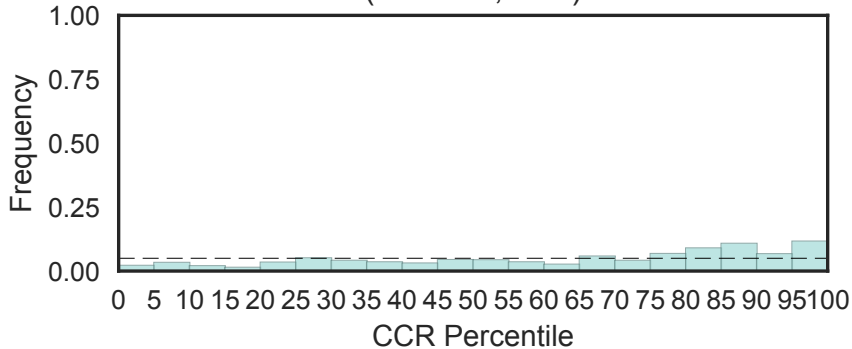

# Eukaryotic translation initiation factor 2 alpha subunit (EIF\_2\_alpha, N=1)

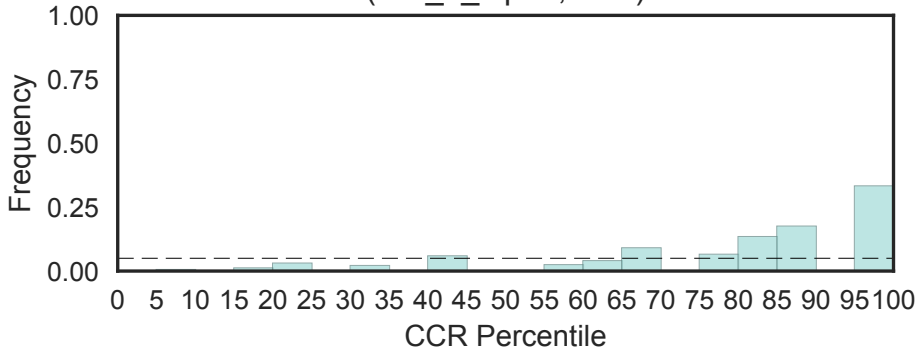

Erythroid krueppel-like transcription factor, transactivation 1  
(EKLF\_TAD1, N=1)

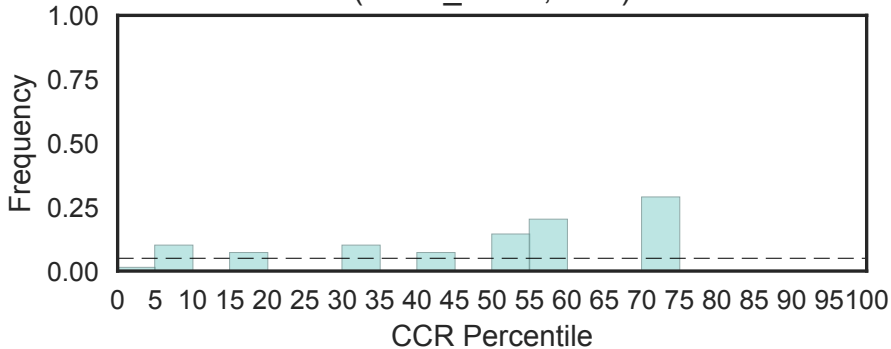

Erythroid krueppel-like transcription factor, transactivation 2  
(EKLF\_TAD2, N=1)

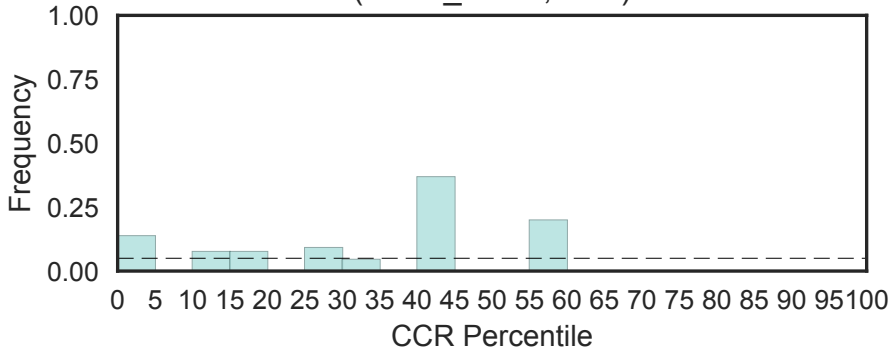

Glutamate/Leucine/Phenylalanine/Valine dehydrogenase  
(ELFV\_dehydrog, N=1)

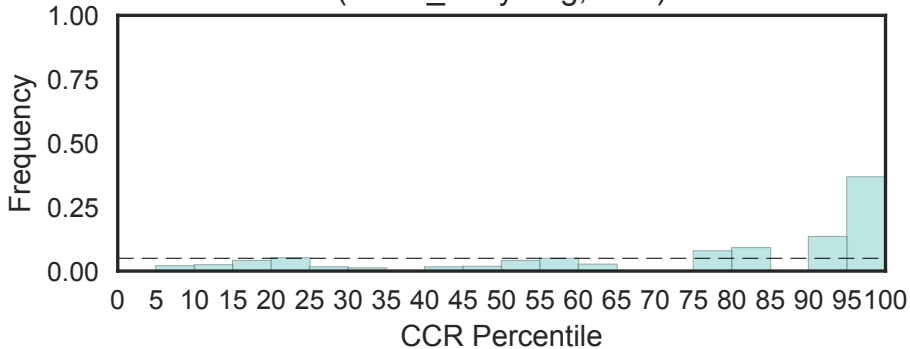

Glu/Leu/Phe/Val dehydrogenase, dimerisation domain  
(ELFV\_dehydrog\_N, N=1)

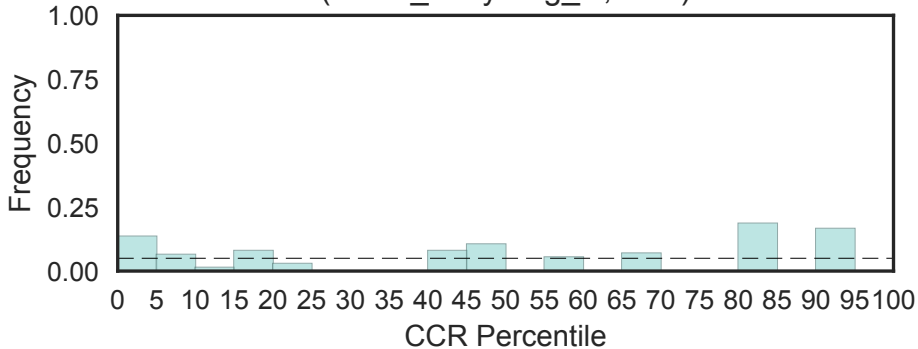



RNA polymerase II elongation factor ELL  
(ELL, N=3)

Fisher's OR: 1.02; Bonferroni p-val: 1

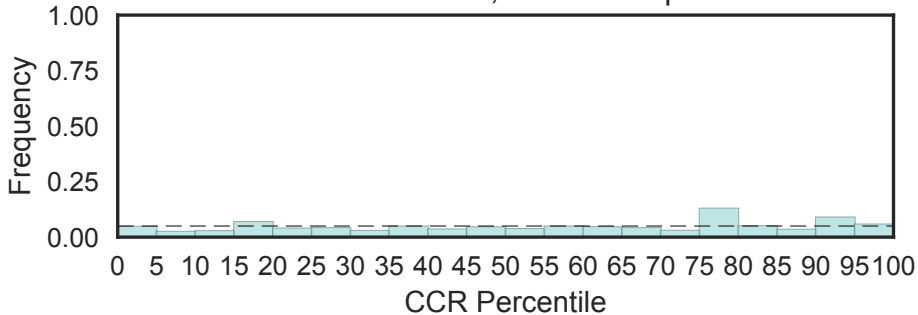

ELM2 domain  
(ELM2, N=13)

Fisher's OR: 4.01; Bonferroni p-val: 1

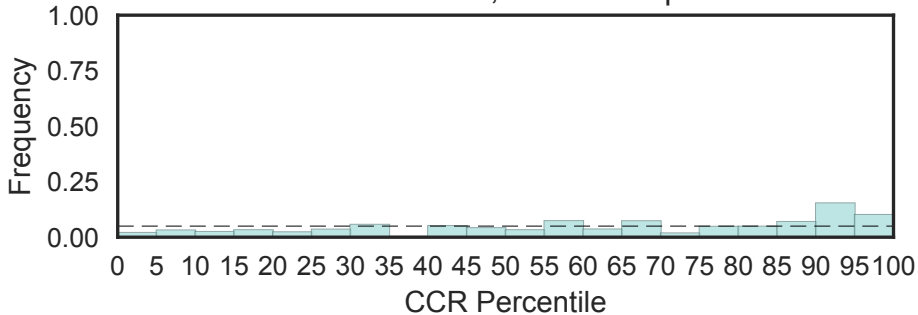

ELMO/CED-12 family  
(ELMO\_CED12, N=6)

Fisher's OR: 0.547; Bonferroni p-val: 1

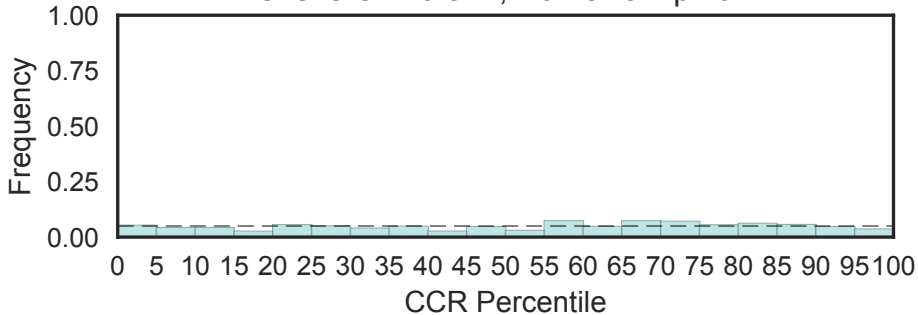

GNS1/SUR4 family  
(ELO, N=7)

Fisher's OR: 1.24; Bonferroni p-val: 1

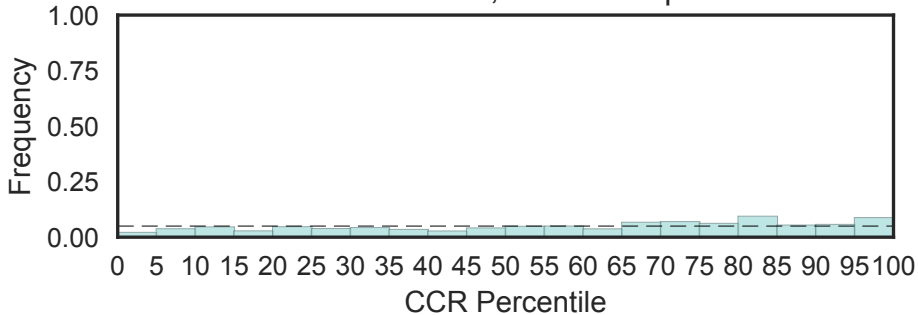

Elongation complex protein 6  
(ELP6, N=1)

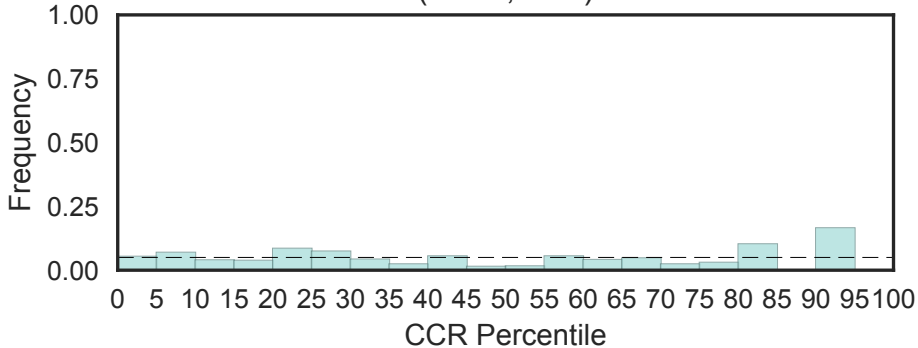

# Nuclear pore complex assembly (ELYS, N=1)

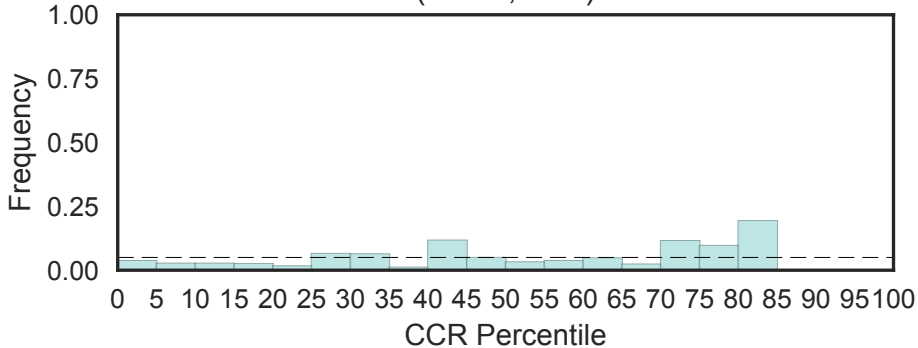

beta-propeller of ELYS nucleoporin  
(ELYS-bb, N=1)

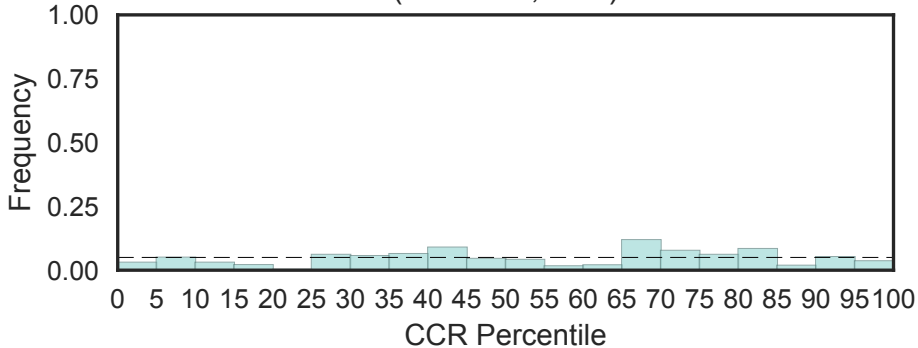

# EMG1/NEP1 methyltransferase (EMG1, N=1)

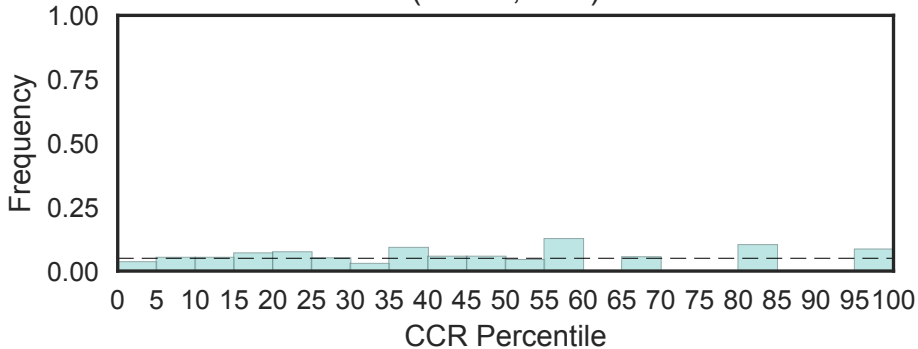



EMI domain  
(EMI, N=9)

Fisher's OR: 0.588; Bonferroni p-val: 1

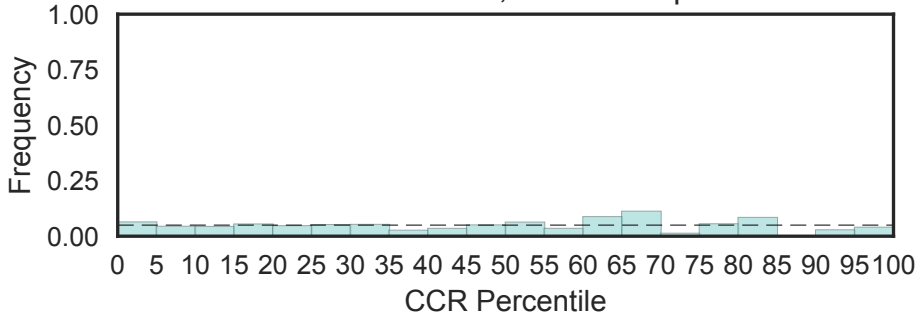

emp24/gp25L/p24 family/GOLD  
(EMP24\_GP25L, N=12)  
Fisher's OR: 0.597; Bonferroni p-val: 1

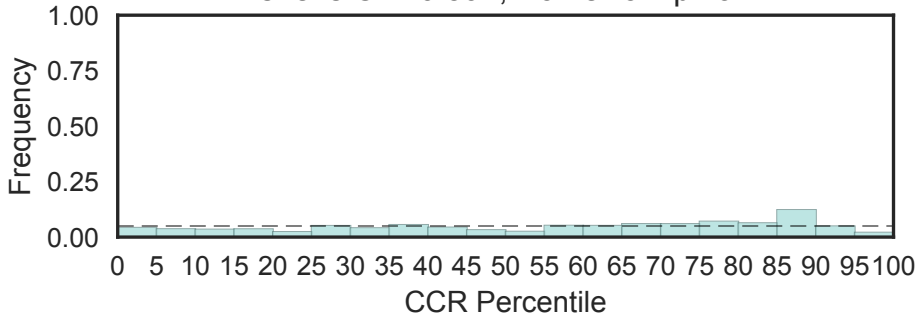

Endomembrane protein 70  
(EMP70, N=4)

Fisher's OR: 3.89; Bonferroni p-val: 0.00739

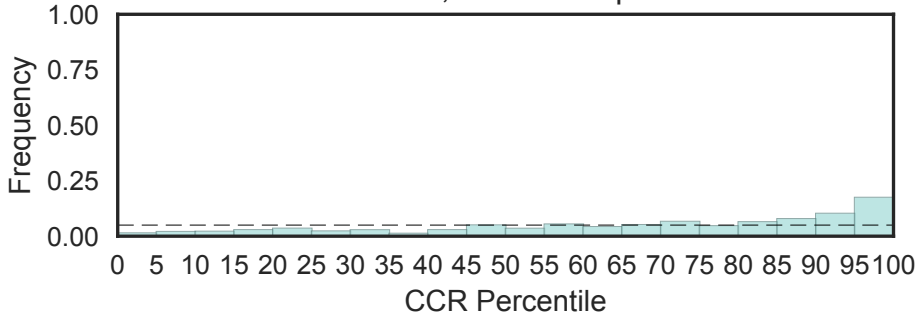

ENT domain  
(ENT, N=1)

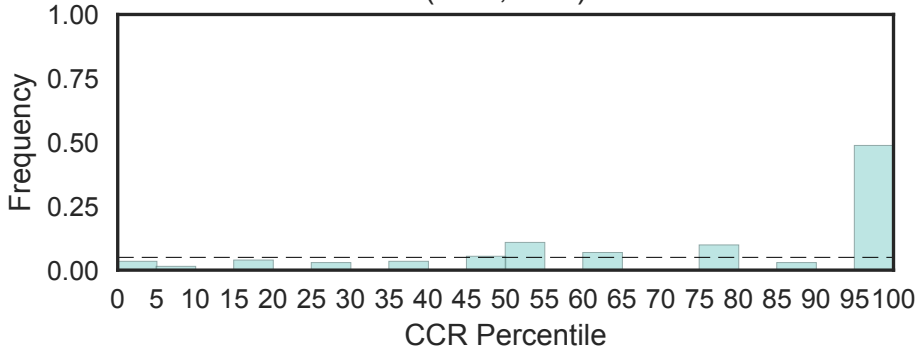

ENTH domain  
(ENTH, N=8)

Fisher's OR: 2.92; Bonferroni p-val: 1

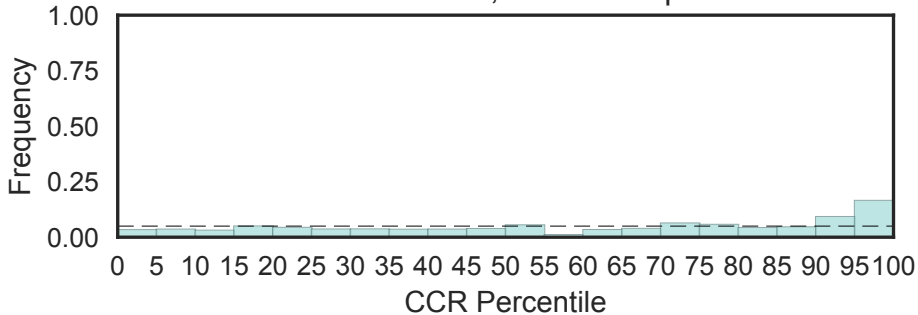

E1A-binding protein p400, N-terminal  
(EP400\_N, N=2)

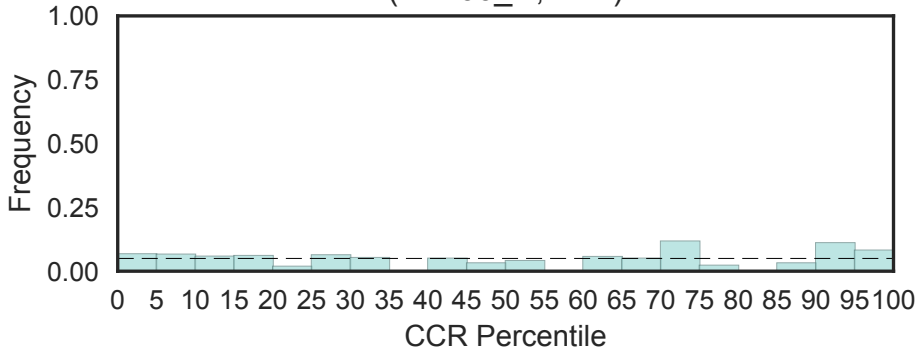

Enhancer of polycomb-like  
(EPL1, N=7)

Fisher's OR: 3.28; Bonferroni p-val: 1

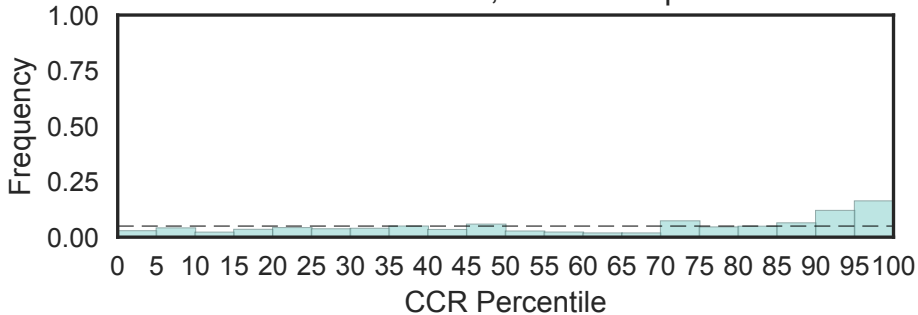

Erythropoietin/thrombopoietin  
(EPO\_TPO, N=2)

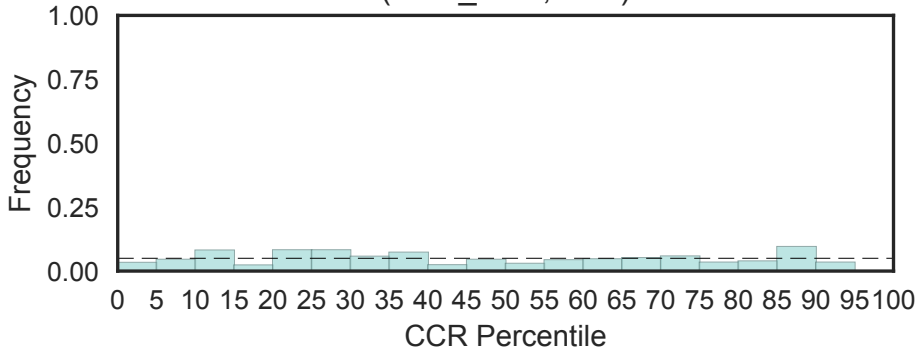



EPTP domain  
(EPTP, N=30)

Fisher's OR: 0.593; Bonferroni p-val: 1

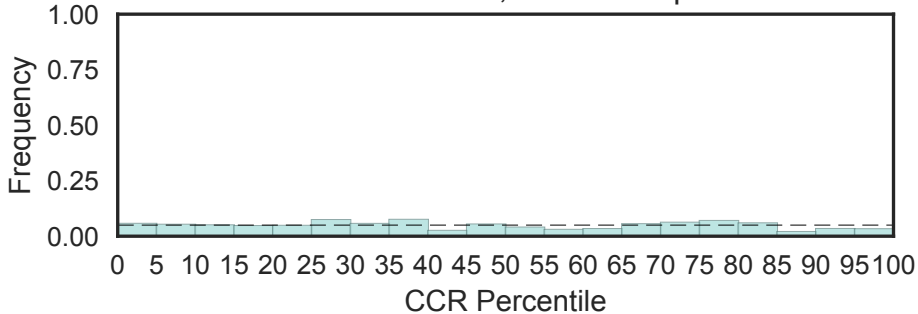

# Enhancer of rudimentary (ER, N=1)

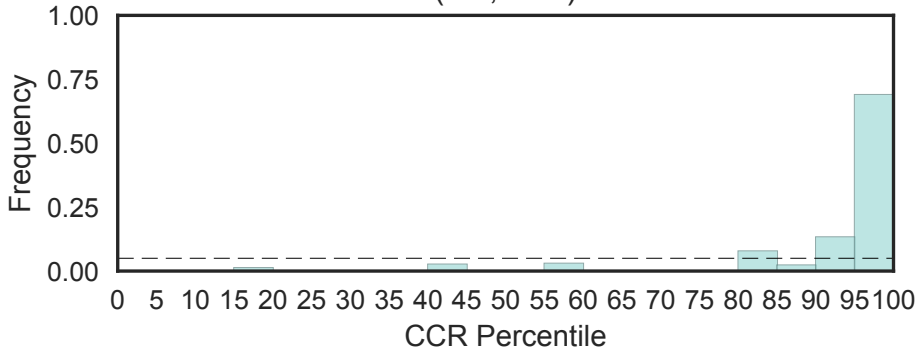

ERAP1-like C-terminal domain  
(ERAP1\_C, N=9)

Fisher's OR: 0.457; Bonferroni p-val: 1

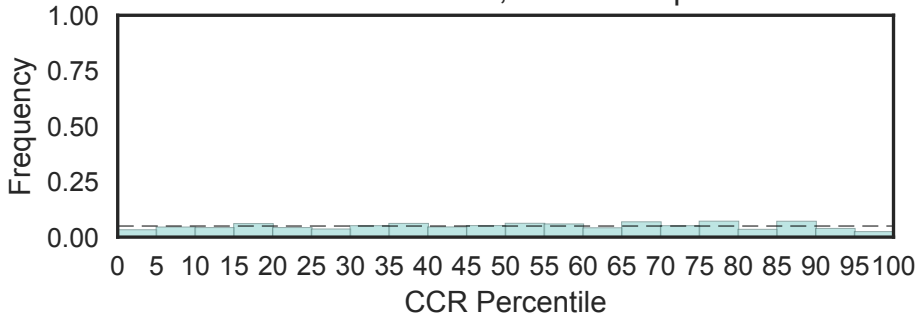

ERCC3/RAD25/XPB C-terminal helicase  
(ERCC3\_RAD25\_C, N=3)

Fisher's OR: 2.24; Bonferroni p-val: 1

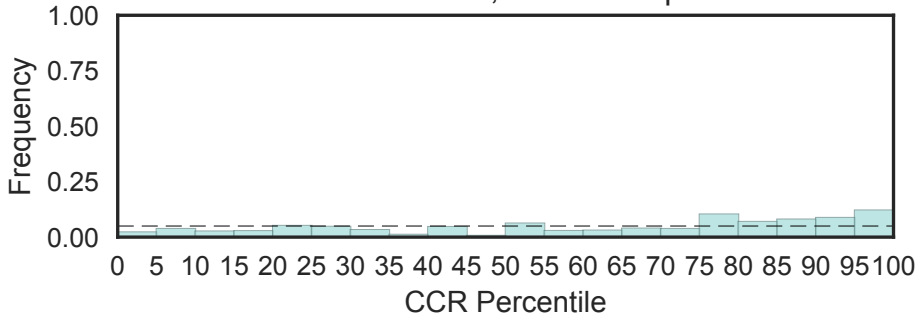

ERCC4 domain  
(ERCC4, N=5)

Fisher's OR: 0; Bonferroni p-val: 1

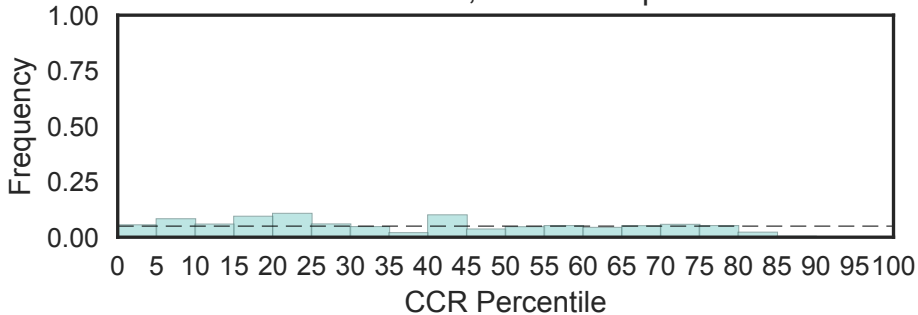

ERG2 and Sigma1 receptor like protein  
(ERG2\_Sigma1R, N=1)

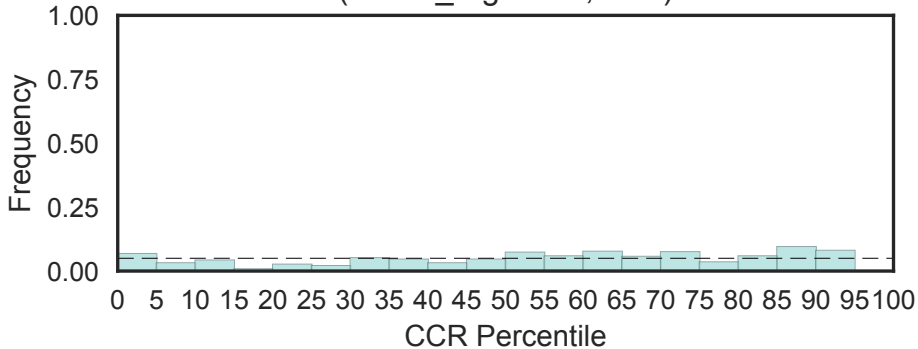

Ergosterol biosynthesis ERG4/ERG24 family  
(ERG4\_ERG24, N=4)

Fisher's OR: 0; Bonferroni p-val: 1

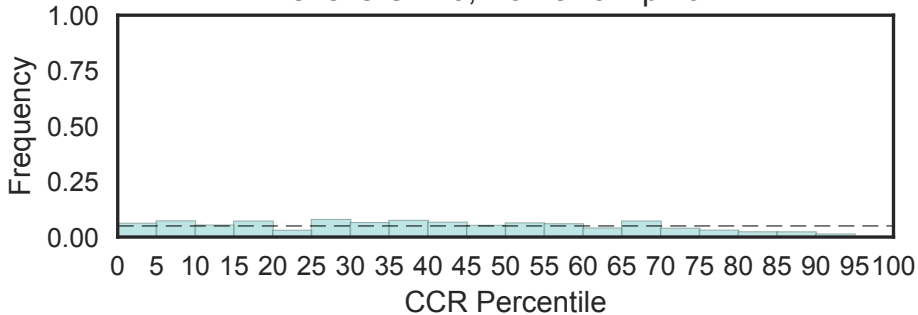

# Endoplasmic Reticulum-Golgi Intermediate Compartment (ERGIC) (ERGIC\_N, N=3)

Fisher's OR: 0; Bonferroni p-val: 1

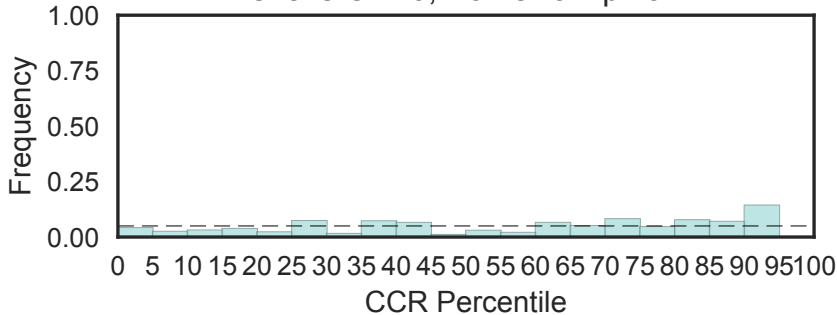



ERK and JNK pathways, inhibitor  
(ERK-JNK\_inhib, N=1)

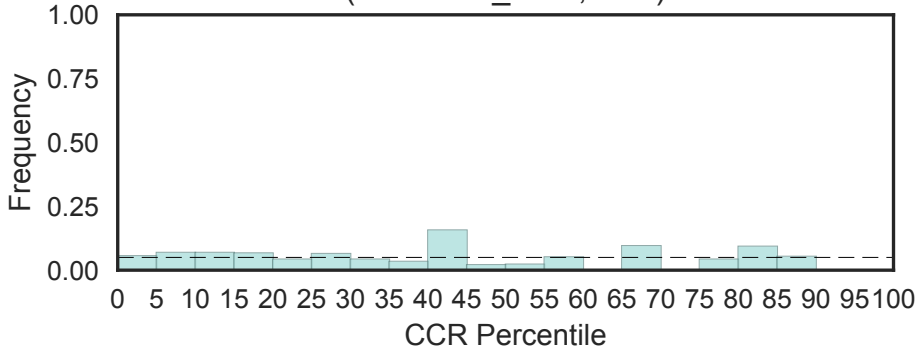

Ezrin/radixin/moesin family  
(ERM, N=3)

Fisher's OR: 0.331; Bonferroni p-val: 1

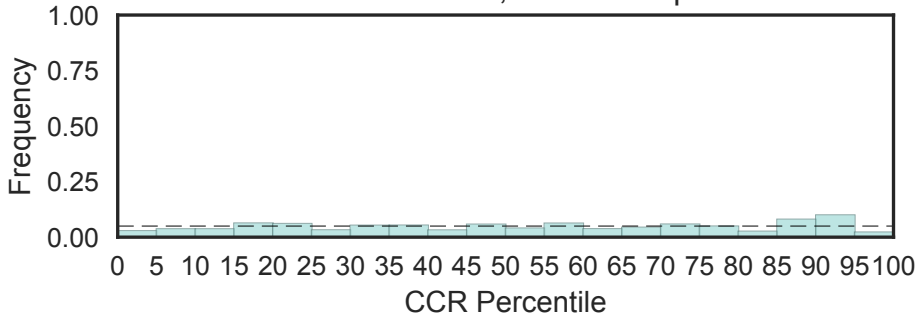

# Endoplasmic Reticulum Oxidoreductin 1 (ERO1) (ERO1, N=2)

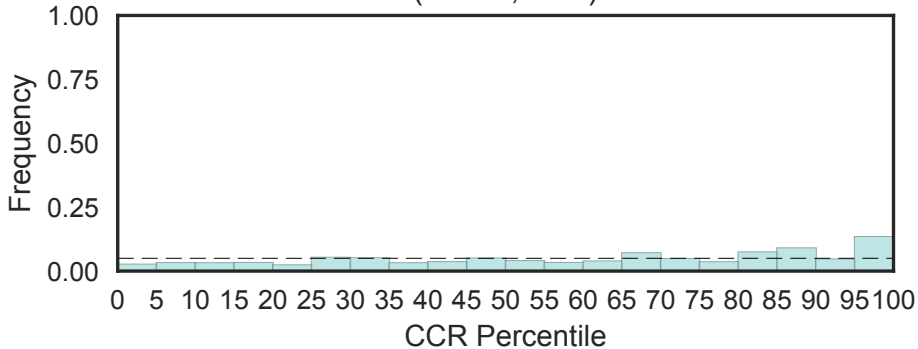

ER lumen protein retaining receptor  
(ER\_lumen\_recept, N=3)  
Fisher's OR: 0; Bonferroni p-val: 1

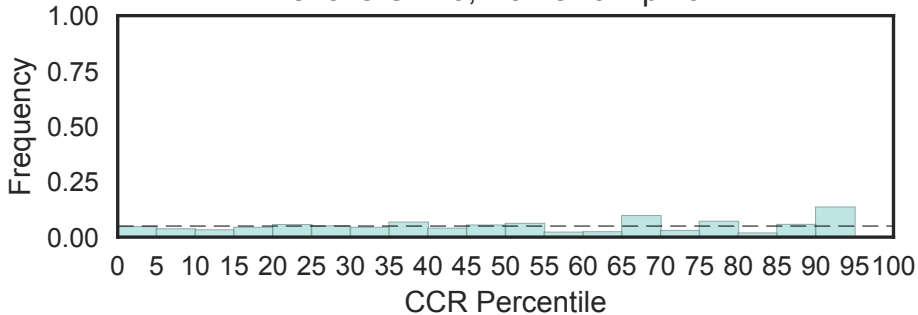

Estrogen receptor beta  
(ERbeta\_N, N=1)

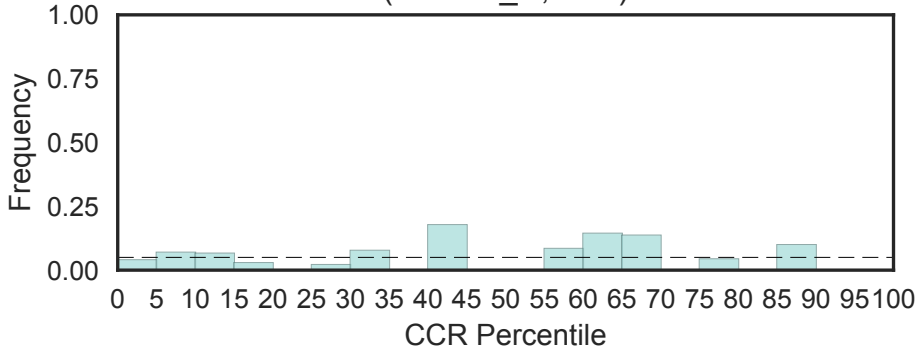

Endoplasmic reticulum protein ERp29, C-terminal domain  
(ERp29, N=1)

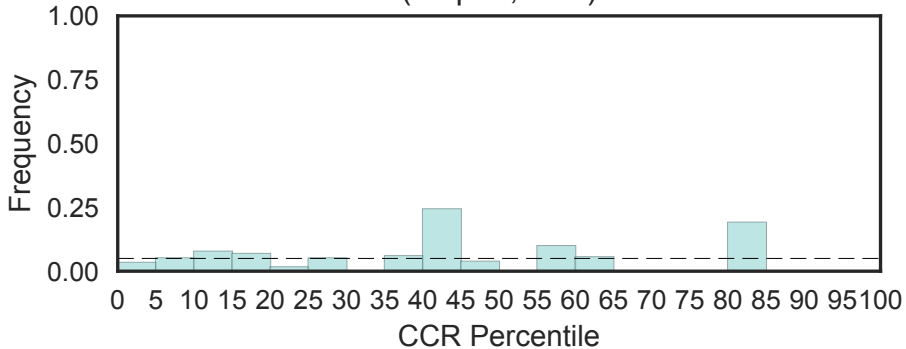

ERp29, N-terminal domain  
(ERp29\_N, N=1)

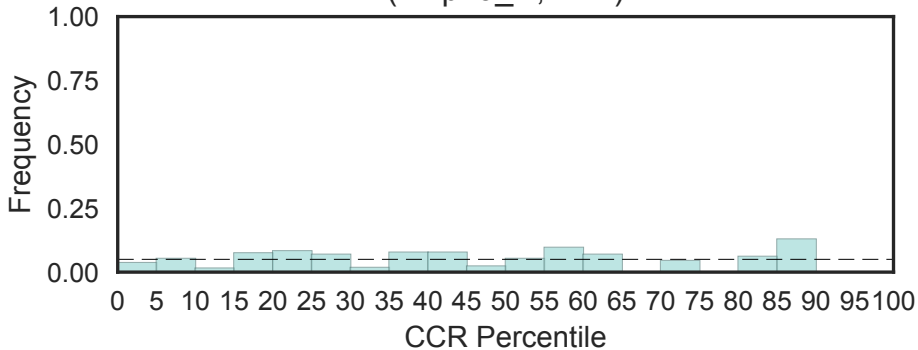

ESCRT-II complex subunit  
(ESCRT-II, N=1)

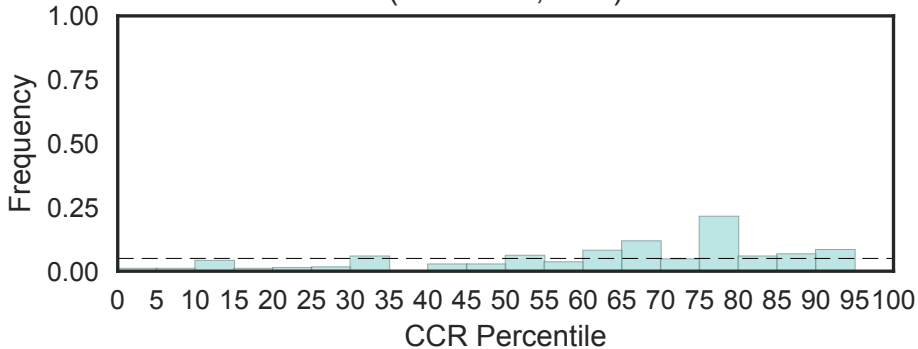



Oestrogen-type nuclear receptor final C-terminal  
(ESR1\_C, N=1)

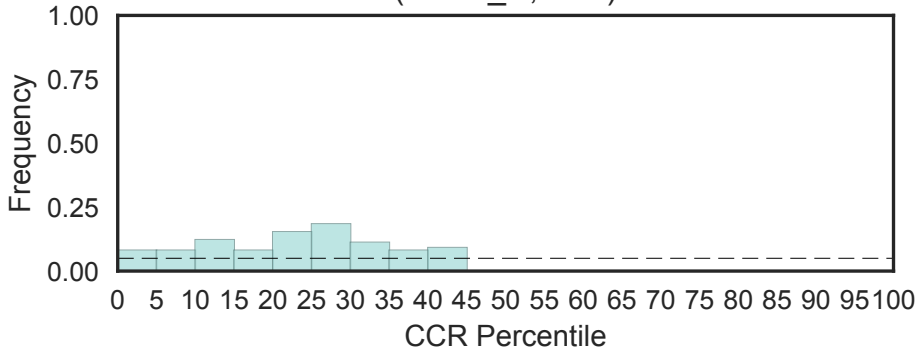

Telomerase activating protein Est1  
(EST1, N=3)  
Fisher's OR: 3.09; Bonferroni p-val: 1

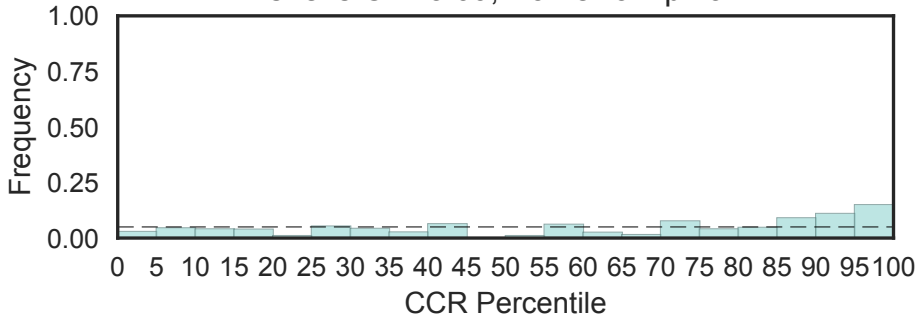

Est1 DNA/RNA binding domain  
(EST1\_DNA\_bind, N=4)  
Fisher's OR: 1.68; Bonferroni p-val: 1

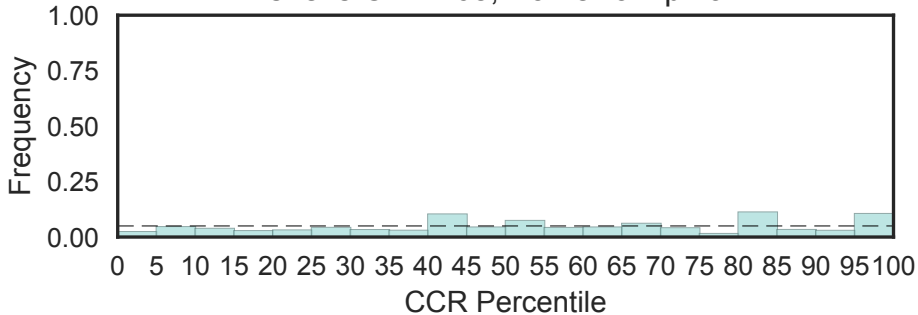

# Ewing's tumour-associated antigen 1 homologue (ETAA1, N=1)

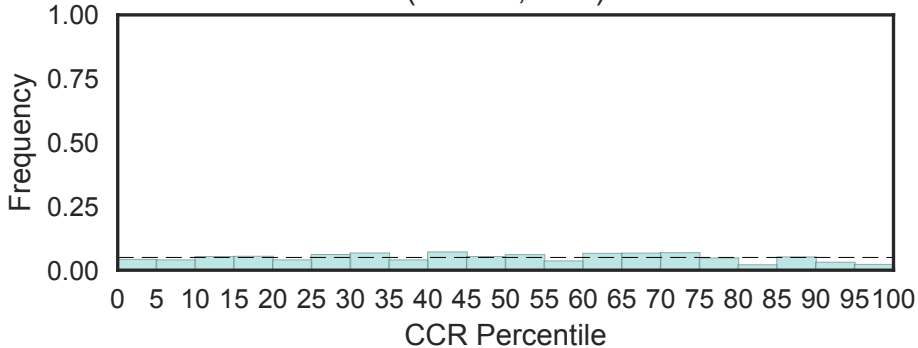

ETC complex I subunit conserved region  
(ETC\_C1\_NDUFA4, N=1)

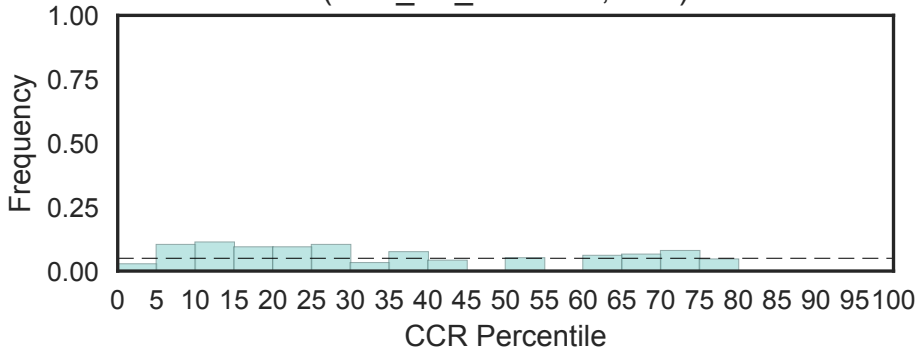

ETC complex I subunit conserved region  
(ETC\_C1\_NDUFA5, N=1)

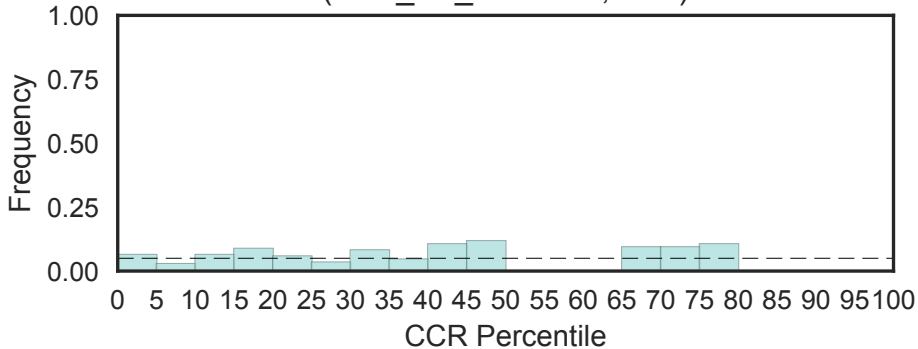

# Electron transfer flavoprotein domain (ETF, N=2)

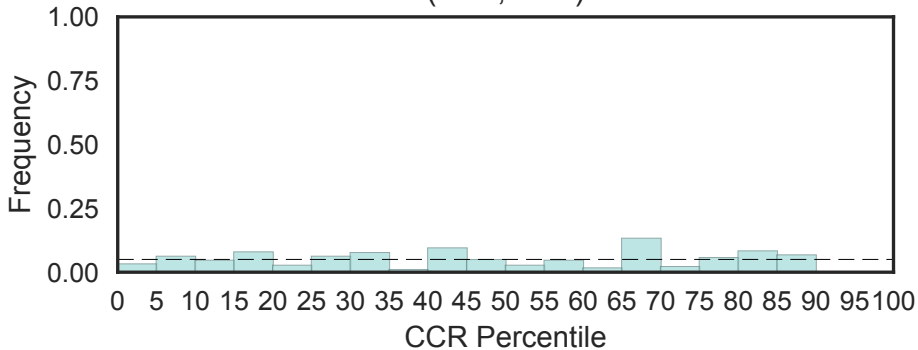

Electron transfer flavoprotein-ubiquinone oxidoreductase, 4Fe-4S  
(ETF\_QO, N=1)

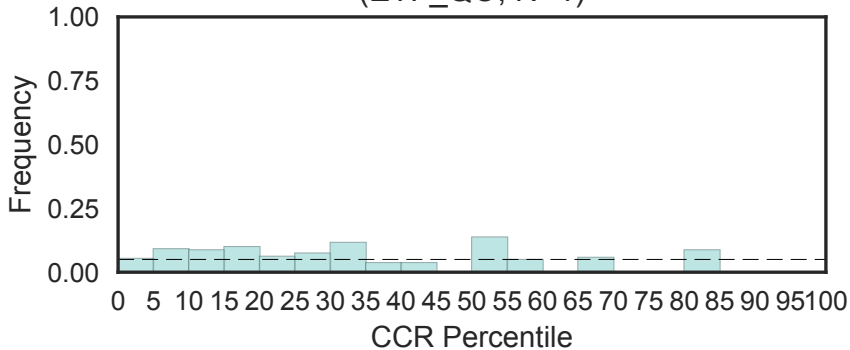



Electron transfer flavoprotein FAD-binding domain  
(ETF\_alpha, N=1)

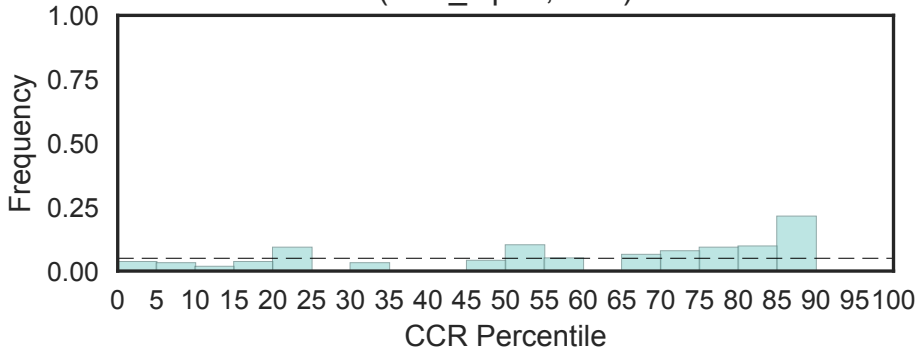

PEA3 subfamily ETS-domain transcription factor N terminal domain  
(ETS\_PEA3\_N, N=6)

Fisher's OR: 1.09; Bonferroni p-val: 1

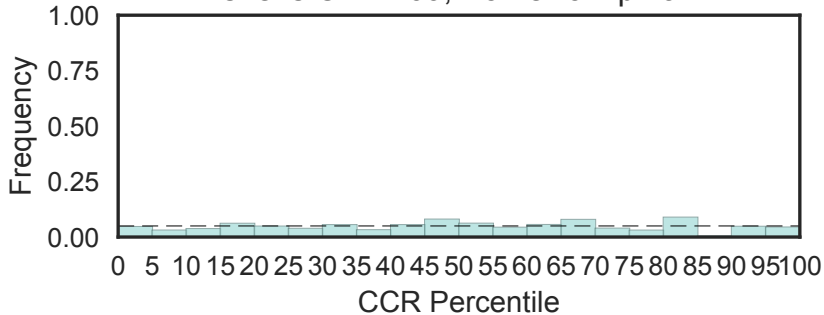

EURL protein  
(EURL, N=1)

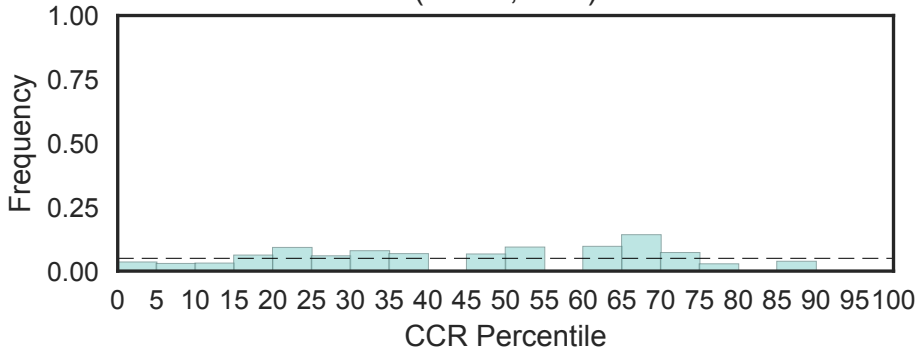

Ellis van Creveld protein 2 like protein  
(EVC2\_like, N=1)

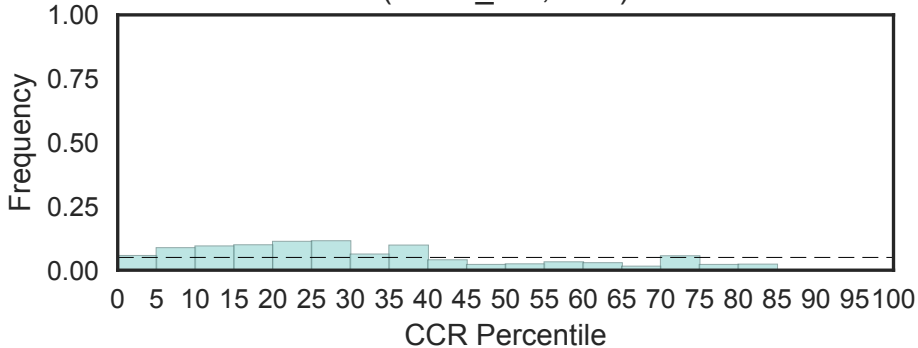

EVE domain  
(EVE, N=1)

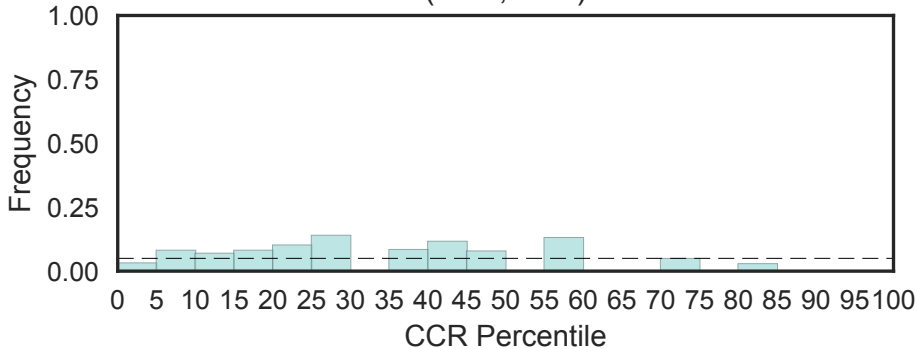

Ectropic viral integration site 2A protein (EVI2A)  
(EVI2A, N=2)

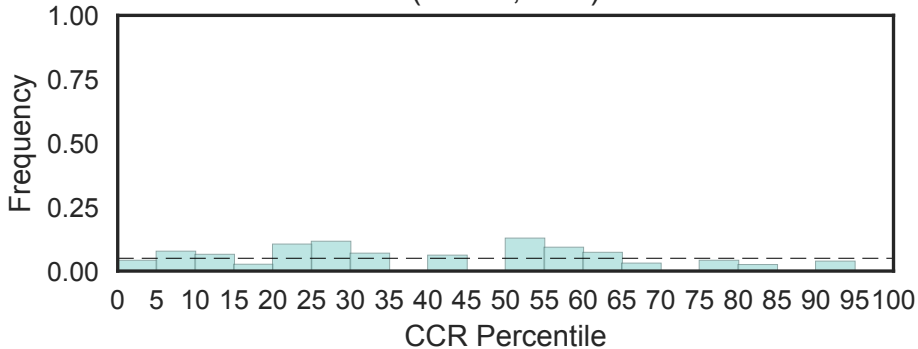

Exosome component EXOSC1/CSL4  
(EXOSC1, N=1)

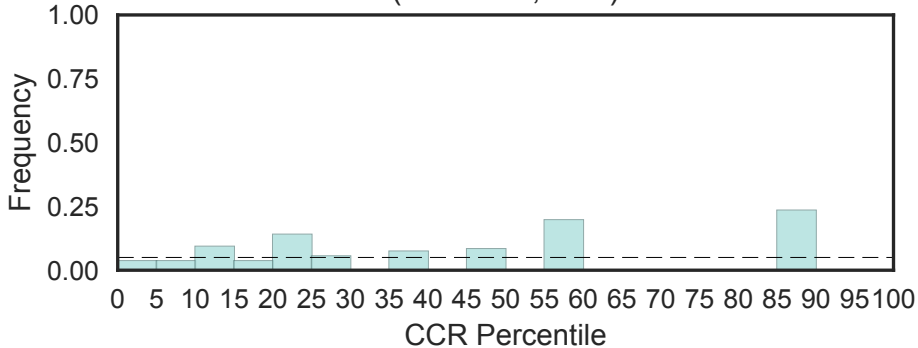

EXS family  
(EXS, N=1)

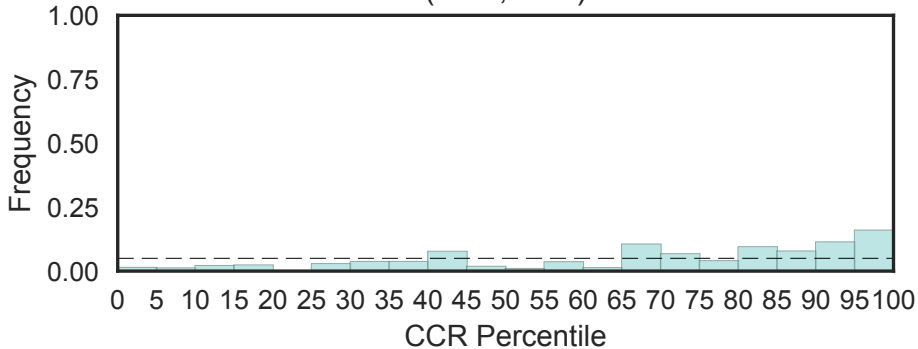



WD repeat binding protein EZH2  
(EZH2\_WD-Binding, N=2)

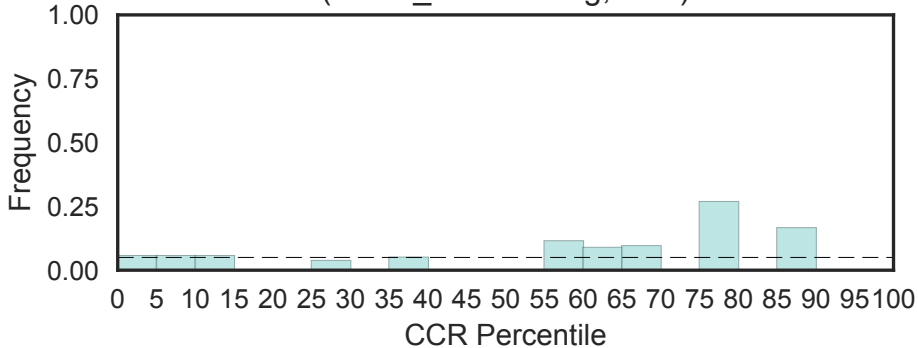

# Enhancer of Polycomb C-terminus (E\_Pc\_C, N=2)

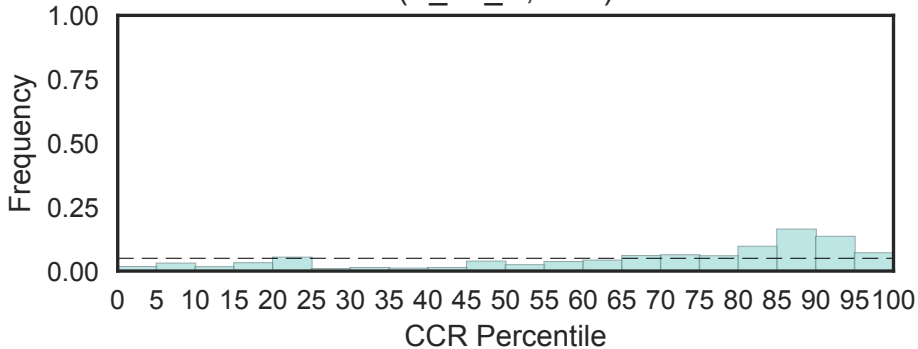

# Chromatin modification-related protein EAF7 (Eaf7, N=1)

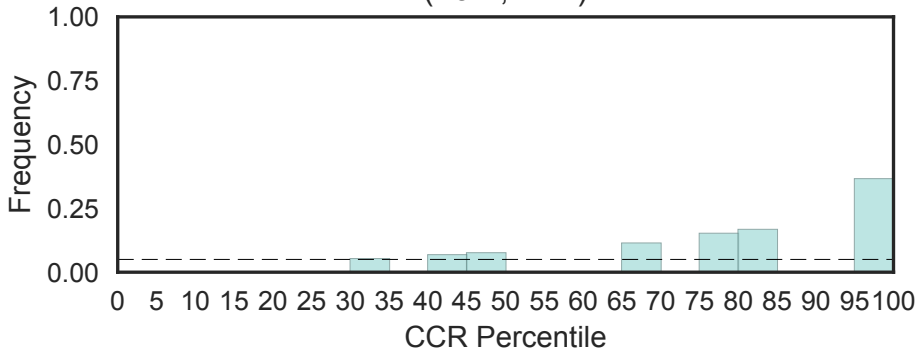

EamA-like transporter family  
(EamA, N=19)

Fisher's OR: 0.424; Bonferroni p-val: 1

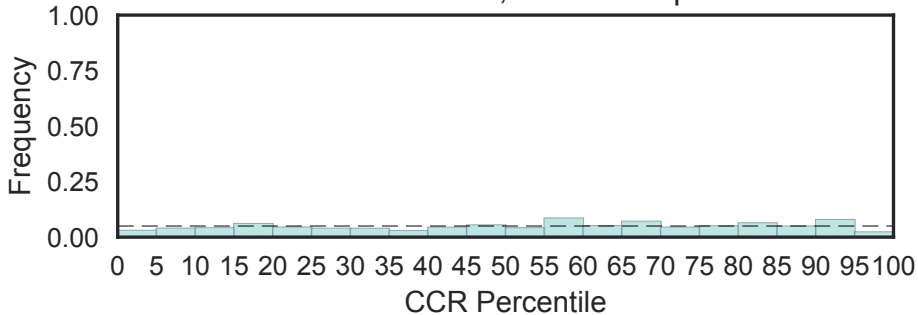

E2F-associated phosphoprotein  
(Eapp\_C, N=1)

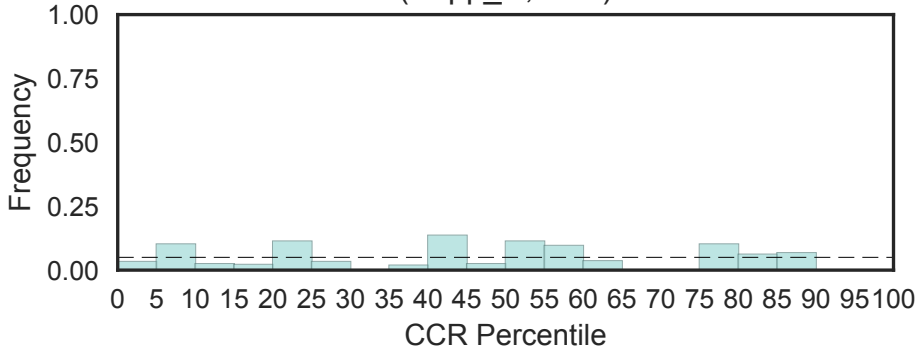

Eukaryotic rRNA processing protein EBP2  
(Ebp2, N=1)

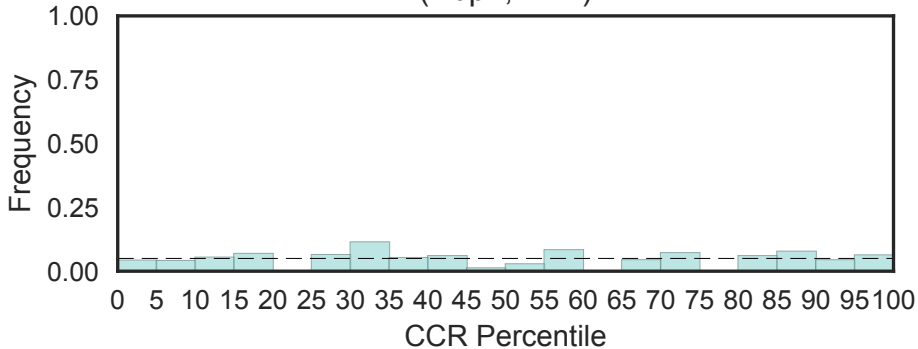

# Ecdysteroid kinase (EcKinase, N=2)

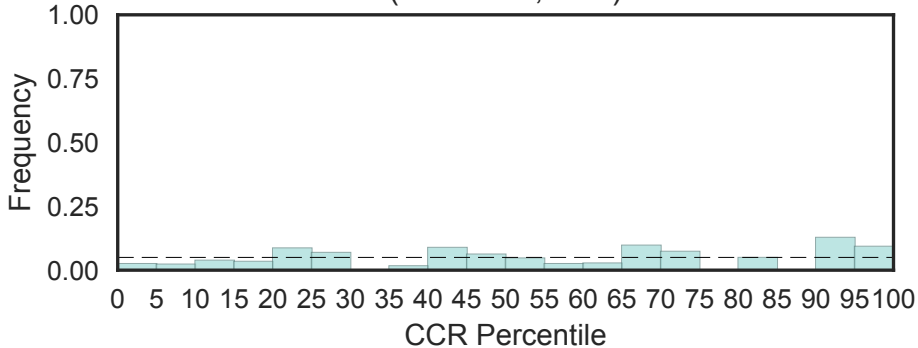

Proteasome stabiliser  
(Ecm29, N=1)

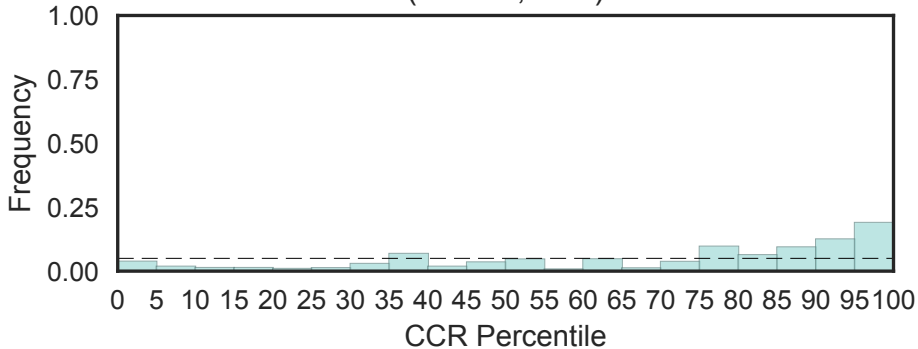



Linker region of enhancer of mRNA-decapping protein 3  
(Edc3\_linker, N=1)

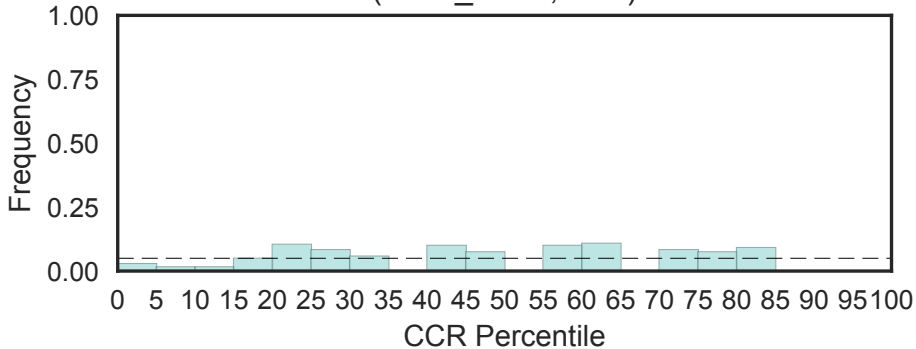

Ehrlichia tandem repeat (Ehrlichia\_rpt)  
(Ehrlichia\_rpt, N=1)

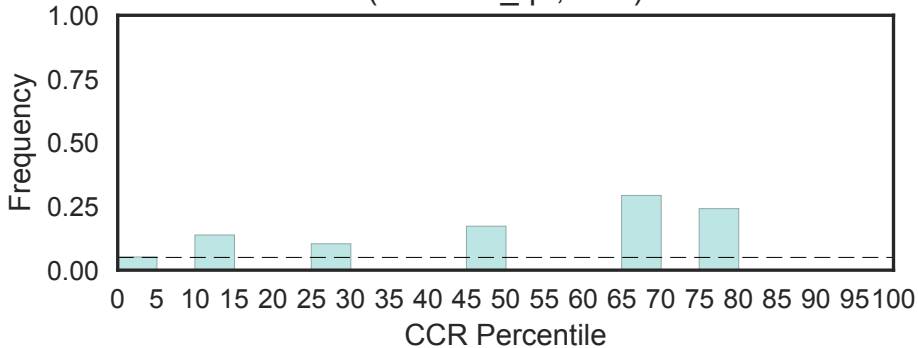

Transcription factor protein N terminal  
(Elf-1\_N, N=2)

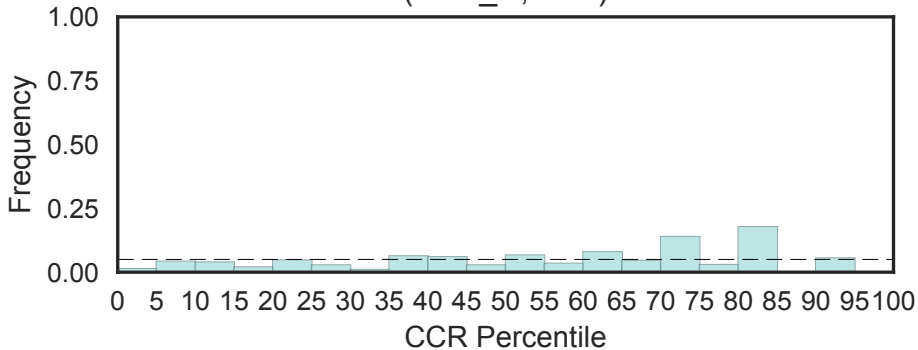

Transcription elongation factor Elf1 like  
(Elf1, N=1)

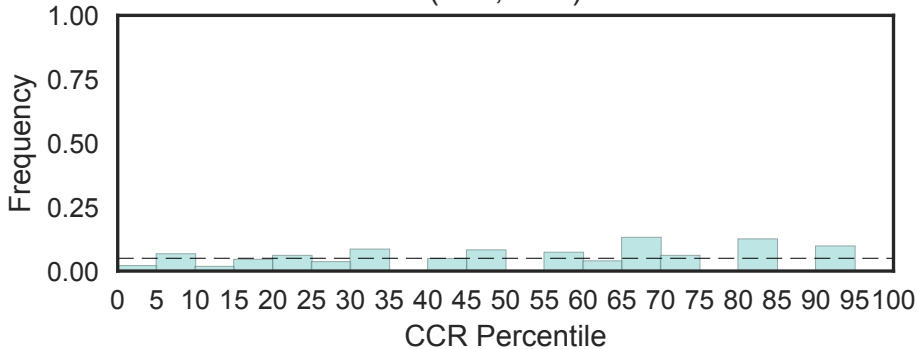

ElonginA binding-protein 1  
(EloA-BP1, N=4)

Fisher's OR: 0; Bonferroni p-val: 1

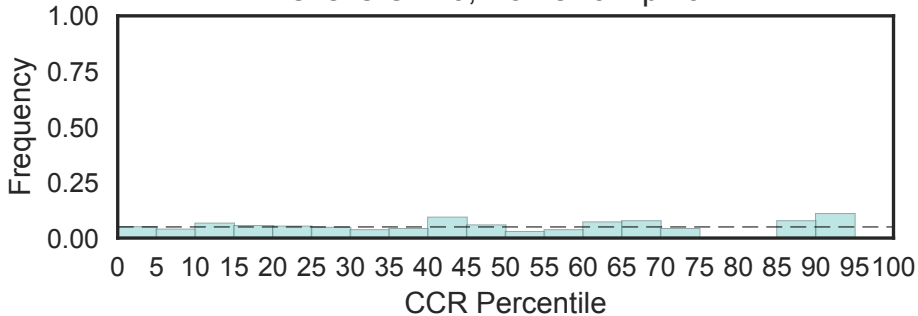

RNA polymerase II transcription factor SIII (Elongin) subunit A  
(Elongin\_A, N=5)

Fisher's OR: 4.5; Bonferroni p-val: 1

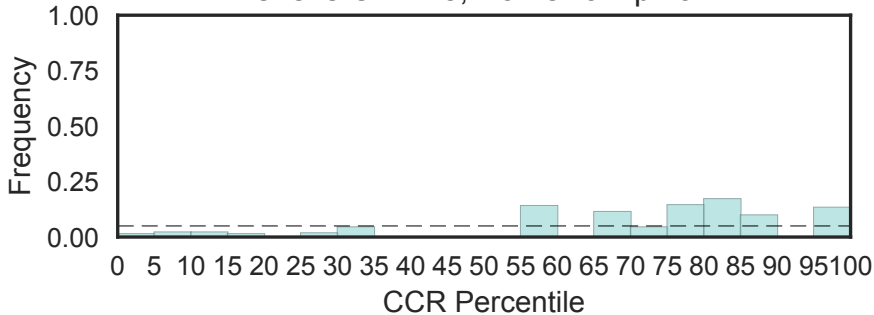

Transcription factor e(y)2  
(EnY2, N=1)

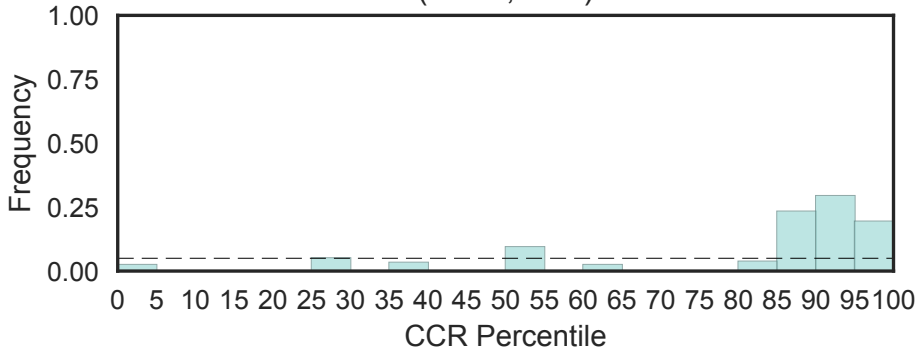

# Enamelin (Enamelin, N=1)

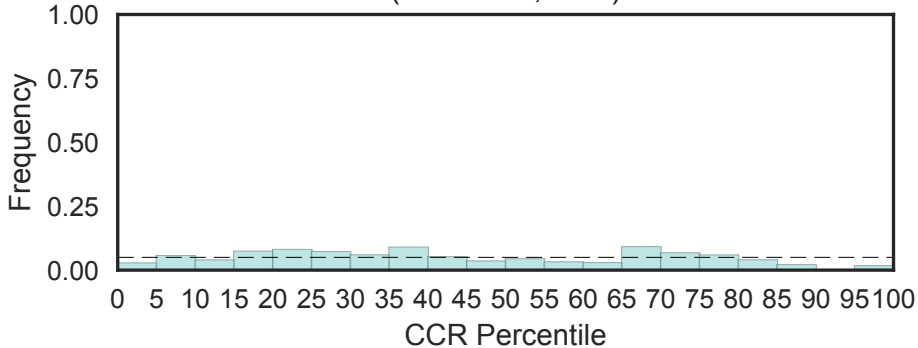



# Endomucin (Endomucin, N=1)

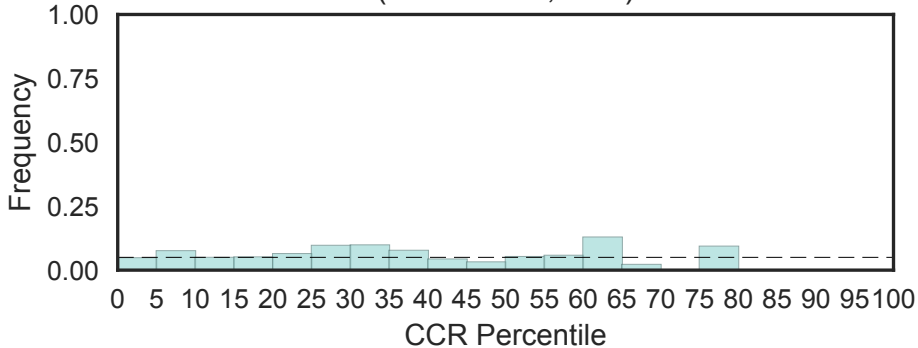

Endonuclease V  
(Endonuclease\_5, N=1)

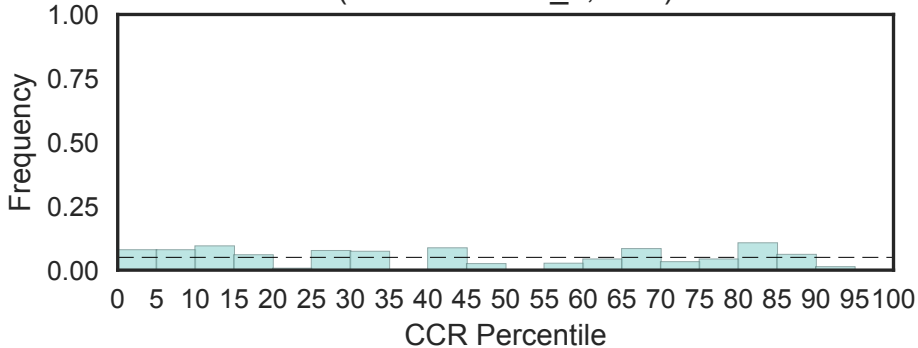

DNA/RNA non-specific endonuclease  
(Endonuclease\_NS, N=6)

Fisher's OR: 0; Bonferroni p-val: 1

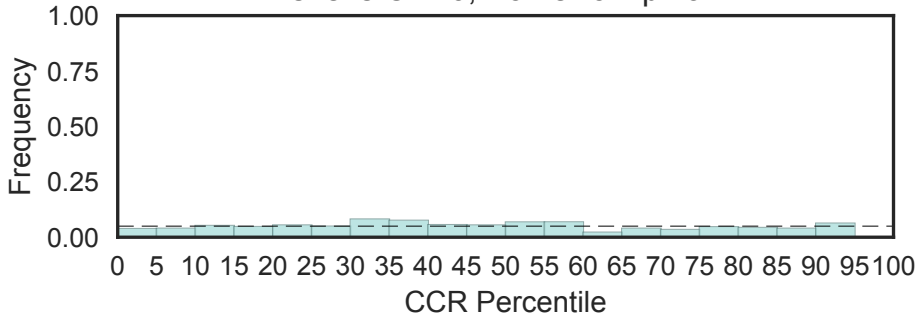

# Collagenase NC10 and Endostatin (Endostatin, N=2)

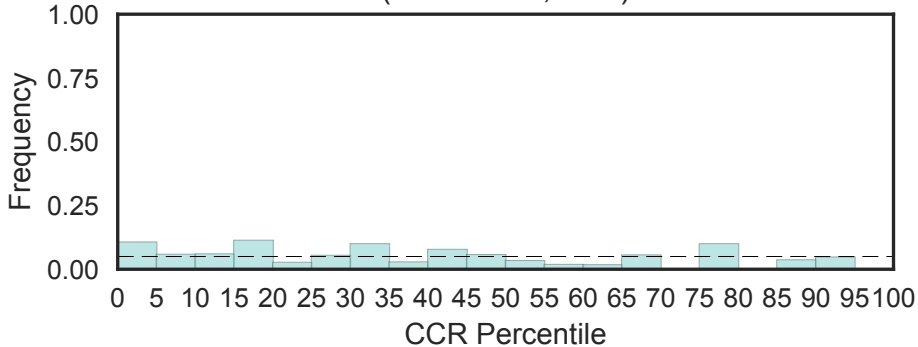

cAMP-regulated phosphoprotein/endosulfine conserved region  
(Endosulfine, N=2)

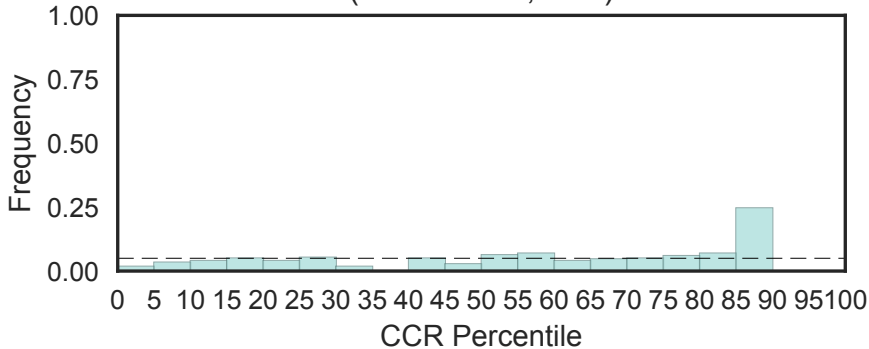

Endothelin family  
(Endothelin, N=3)

Fisher's OR: 0; Bonferroni p-val: 1

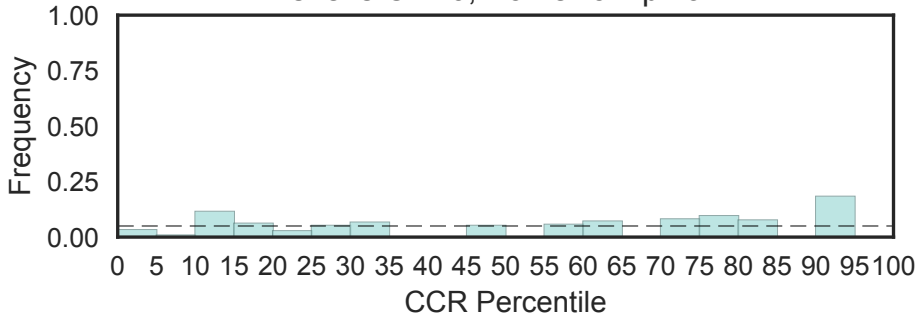

Engrailed homeobox C-terminal signature domain  
(Engrail\_1\_C\_sig, N=2)

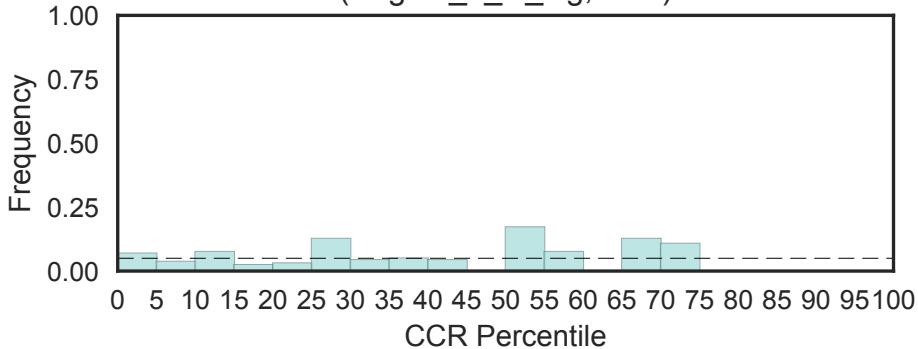

# Calmodulin-binding (Enkurin, N=2)

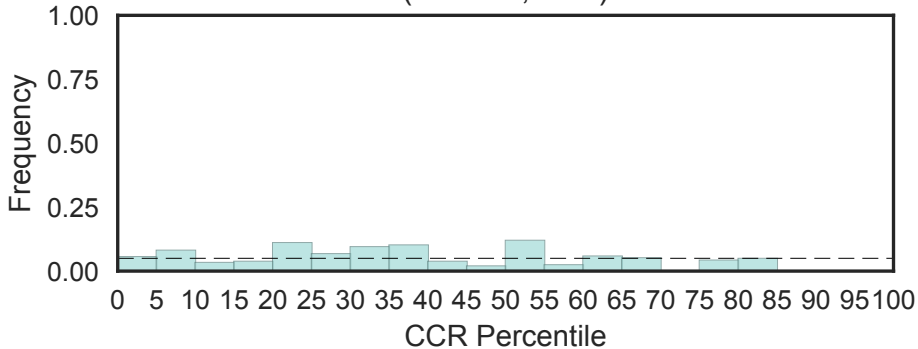



Enolase, C-terminal TIM barrel domain  
(Enolase\_C, N=4)

Fisher's OR: 0; Bonferroni p-val: 1

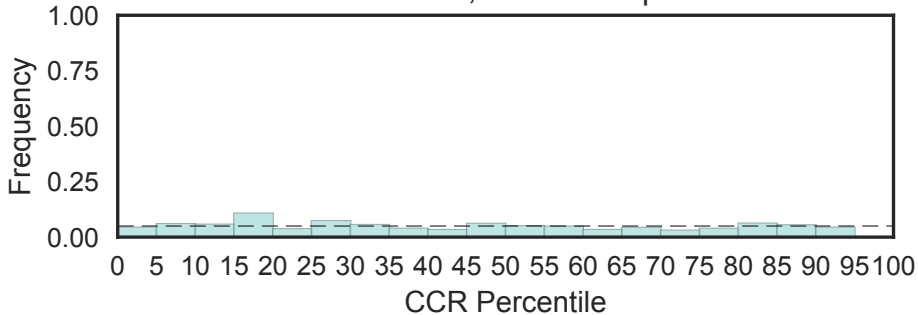

# Enolase, N-terminal domain

(Enolase\_N, N=4)

Fisher's OR: 0; Bonferroni p-val: 1

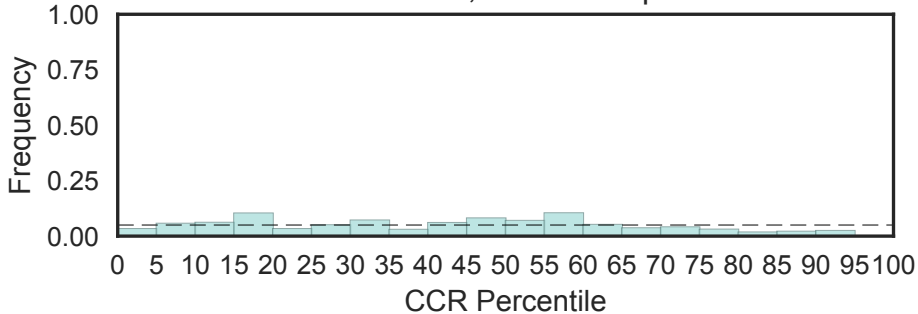

# Ependymin (Ependymin, N=2)

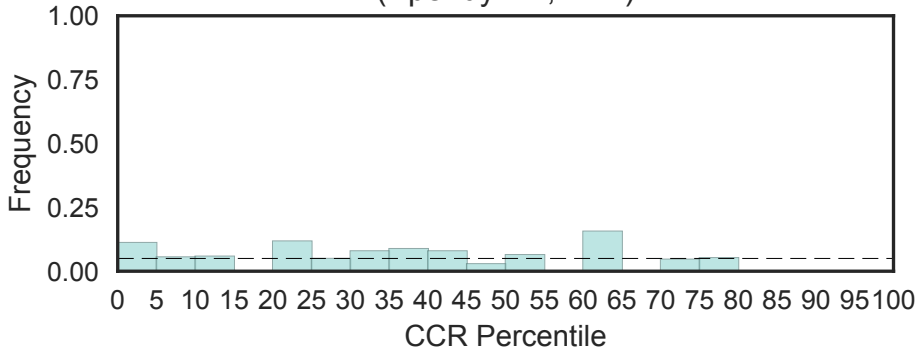

Ephrin type-A receptor 2 transmembrane domain  
(EphA2\_TM, N=14)

Fisher's OR: 0.24; Bonferroni p-val: 1

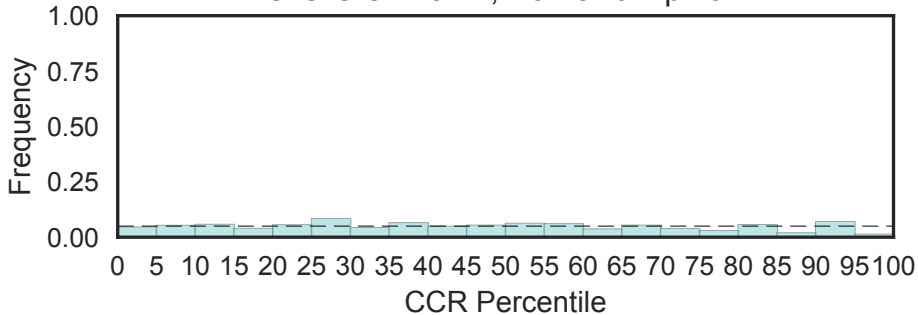

Ephrin  
(Ephrin, N=8)

Fisher's OR: 2.18; Bonferroni p-val: 1

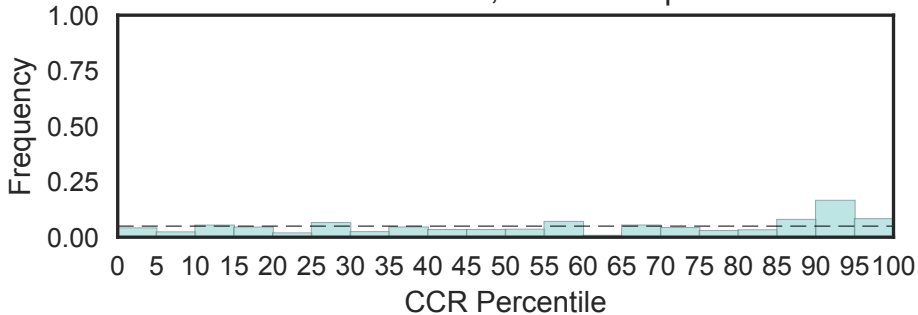

Ephrin receptor ligand binding domain  
(Ephrin\_lbd, N=14)

Fisher's OR: 0.8559; Bonferroni p-val: 1

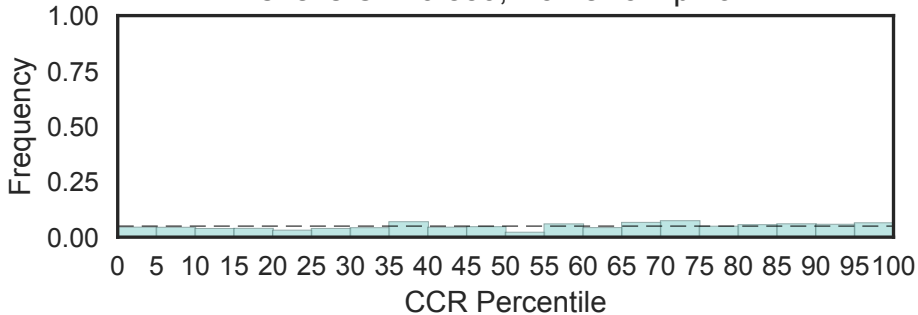

Putative ephrin-receptor like  
(Ephrin\_rec\_like, N=21)  
Fisher's OR: 0.849; Bonferroni p-val: 1

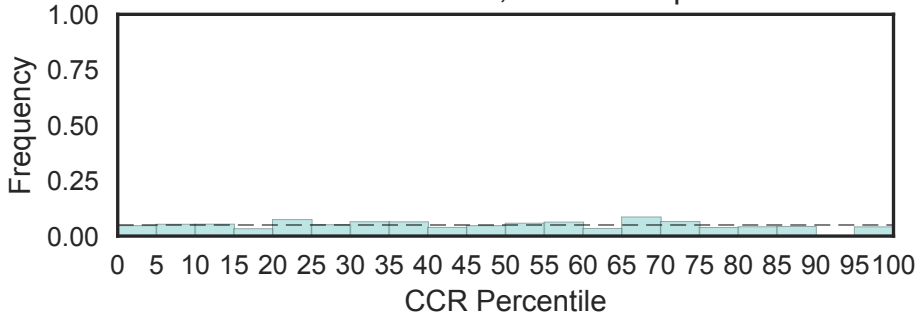

NAD dependent epimerase/dehydratase family  
(Epimerase, N=26)

Fisher's OR: 0.3339; Bonferroni p-val: 1

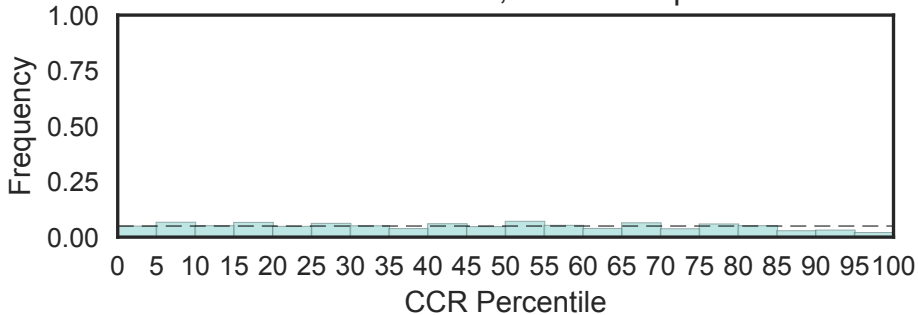



UDP-N-acetylglucosamine 2-epimerase  
(Epimerase\_2, N=1)

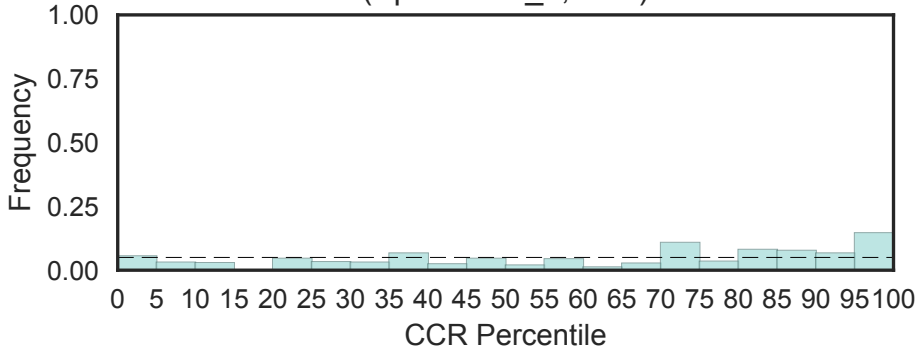

Erythropoietin receptor, ligand binding  
(EpoR\_lig-bind, N=6)

Fisher's OR: 0; Bonferroni p-val: 1

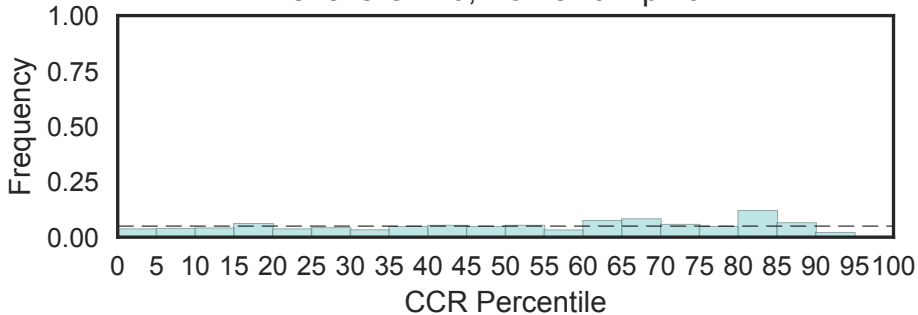

Golgin subfamily A member 7/ERF4 family  
(Erf4, N=4)

Fisher's OR: 3.77; Bonferroni p-val: 1

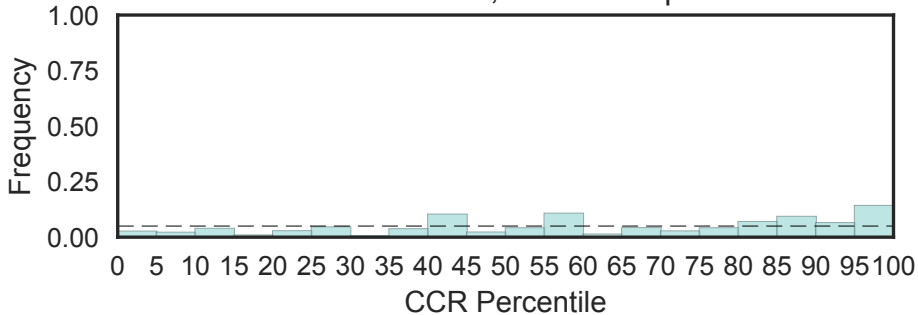

Erg28 like protein  
(Erg28, N=1)

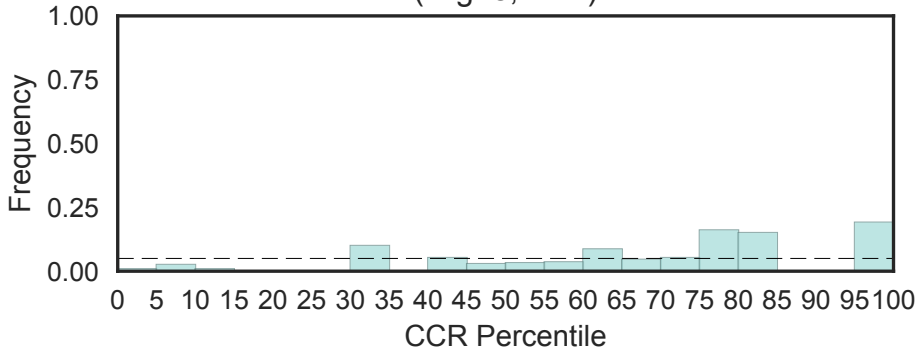

Transmembrane adaptor Erv26  
(Erv26, N=2)

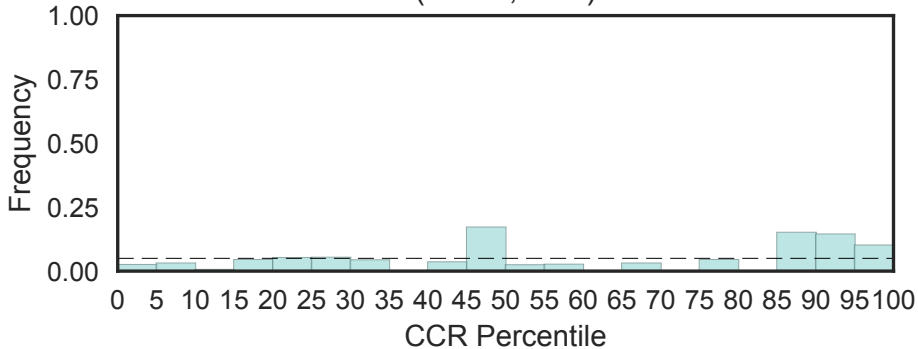

# Nuclear protein Es2 (Es2, N=1)

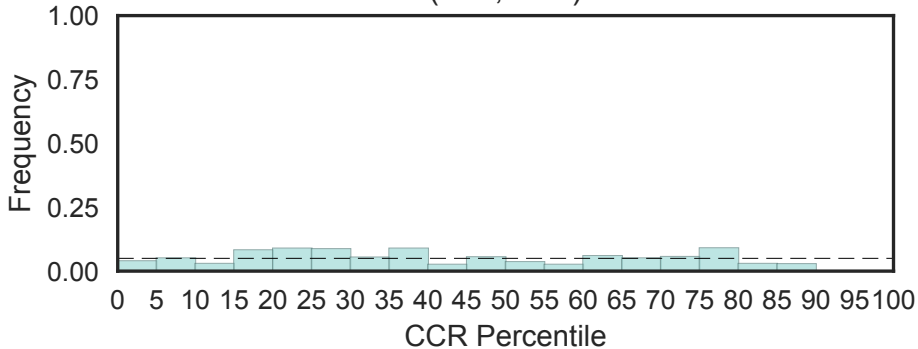

Putative esterase  
(Esterase, N=4)

Fisher's OR: 0; Bonferroni p-val: 1

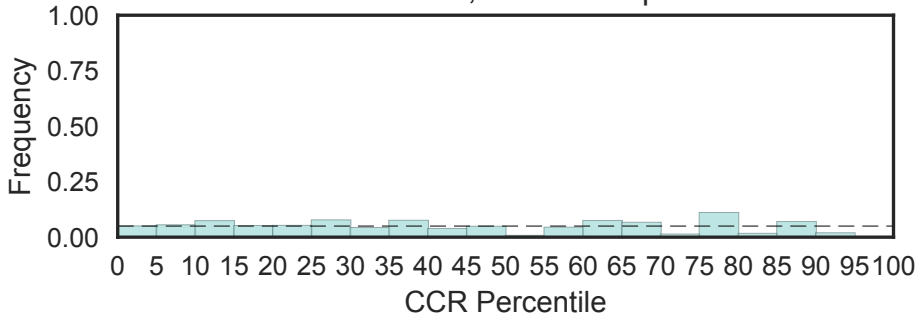

Esterase PHB depolymerase  
(Esterase\_phd, N=1)

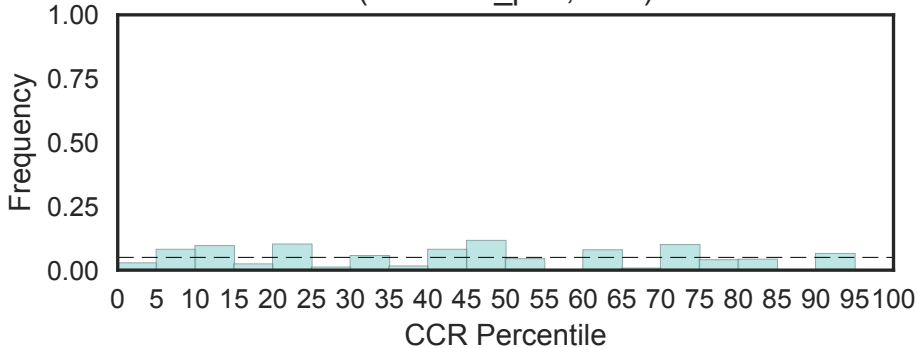



Ets-domain  
(Ets, N=28)

Fisher's OR: 7.99; Bonferroni p-val: 7.64e-14

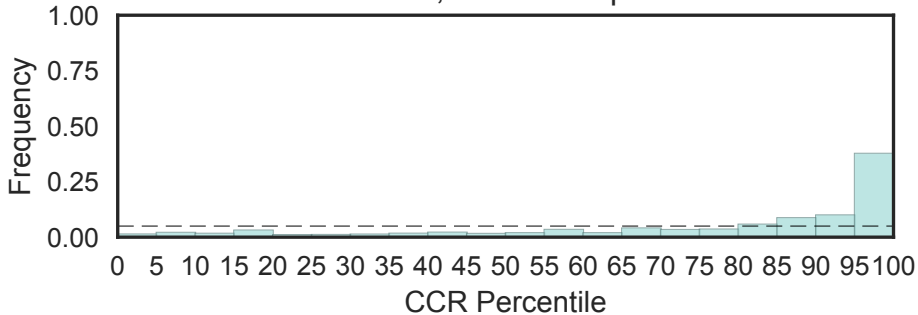

Erv1 / Alr family  
(Evr1\_Alr, N=3)

Fisher's OR: 0.751; Bonferroni p-val: 1

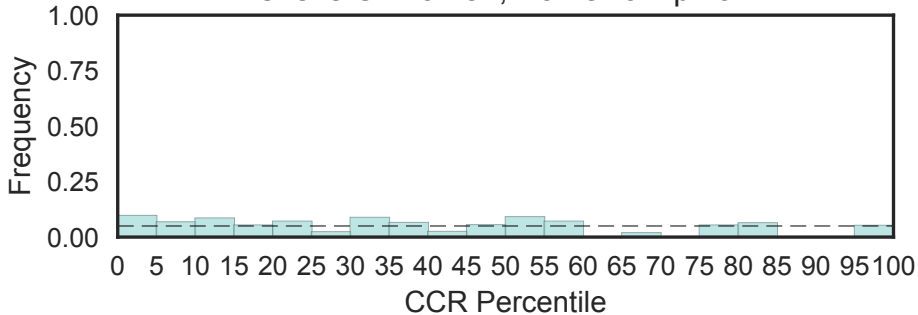

Exonuclease V - a 5' deoxyribonuclease  
(Exo5, N=2)

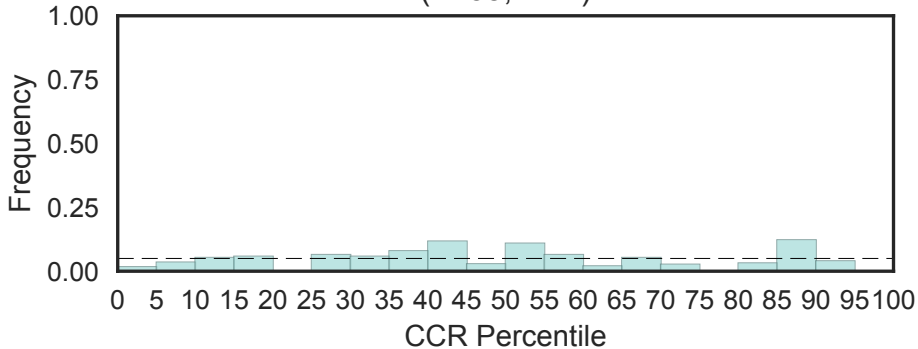

Exo70 exocyst complex subunit  
(Exo70, N=1)

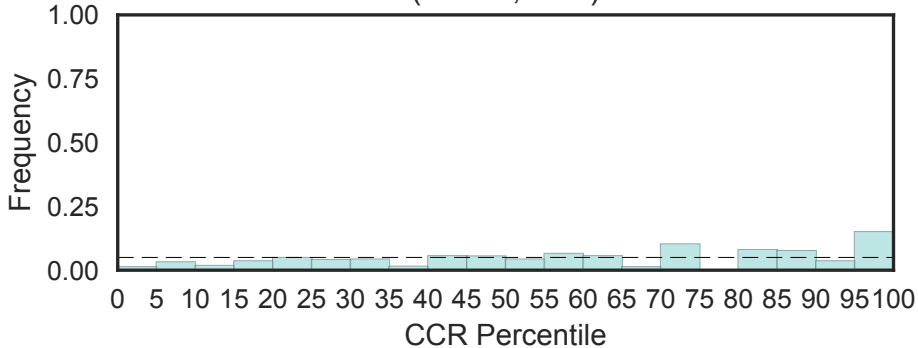

Exocyst component 84 C-terminal  
(Exo84\_C, N=1)

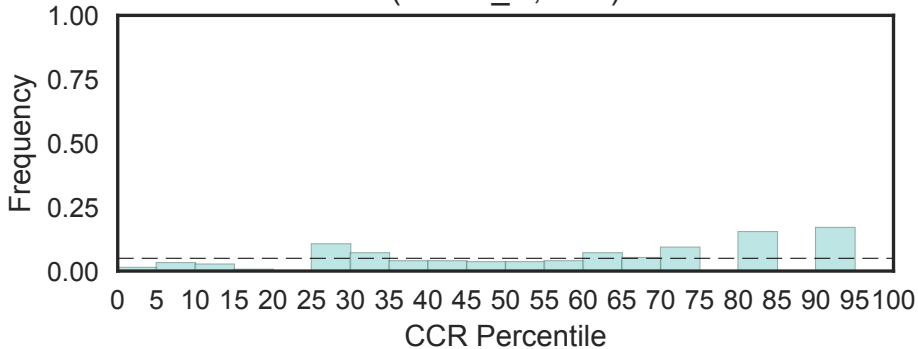

Endonuclease/Exonuclease/phosphatase family  
(Exo\_endo\_phos, N=21)

Fisher's OR: 0.839; Bonferroni p-val: 1

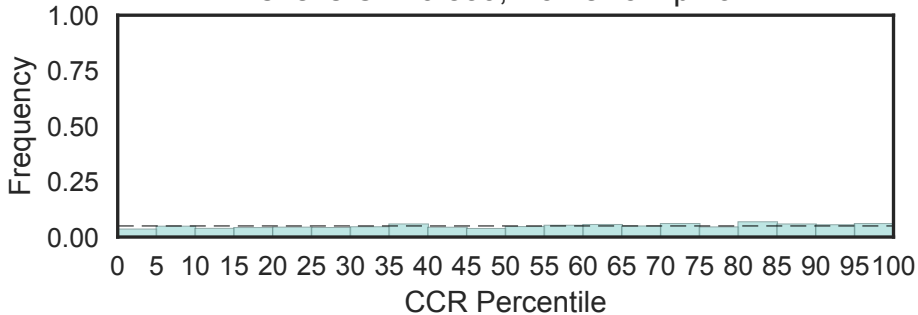

Exostosin family  
(Exostosin, N=4)

Fisher's OR: 0; Bonferroni p-val: 1

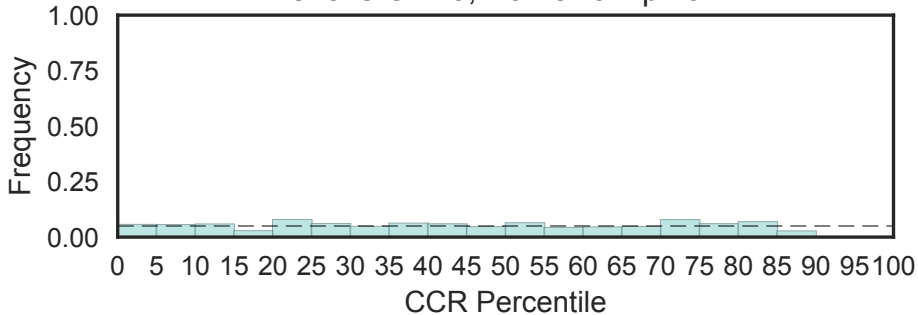

F-actin capping protein alpha subunit  
(F-actin\_cap\_A, N=3)

Fisher's OR: 0.449; Bonferroni p-val: 1

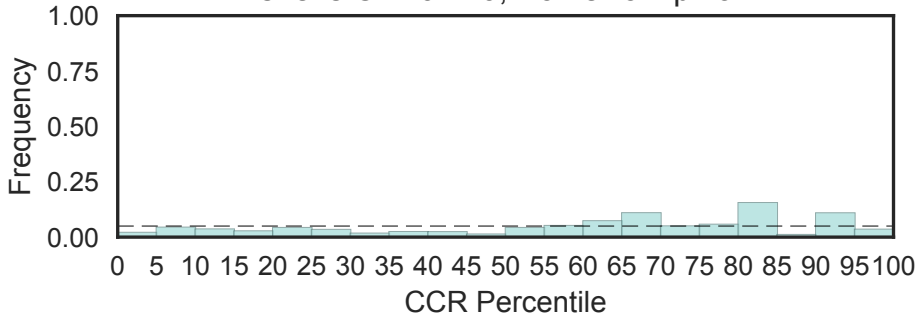



F-box domain  
(F-box, N=68)

Fisher's OR: 2; Bonferroni p-val: 1

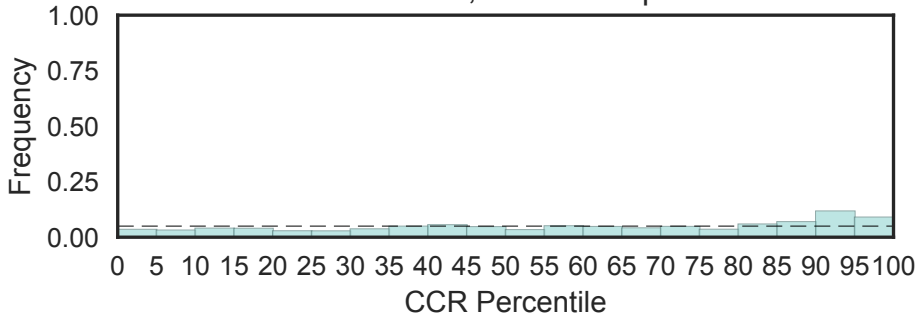

F-box-like  
(F-box-like, N=55)

Fisher's OR: 2.06; Bonferroni p-val: 1

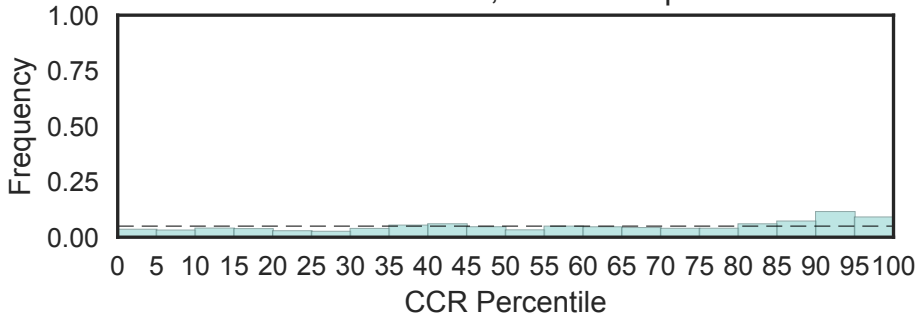

F-box  
(F-box\_4, N=2)

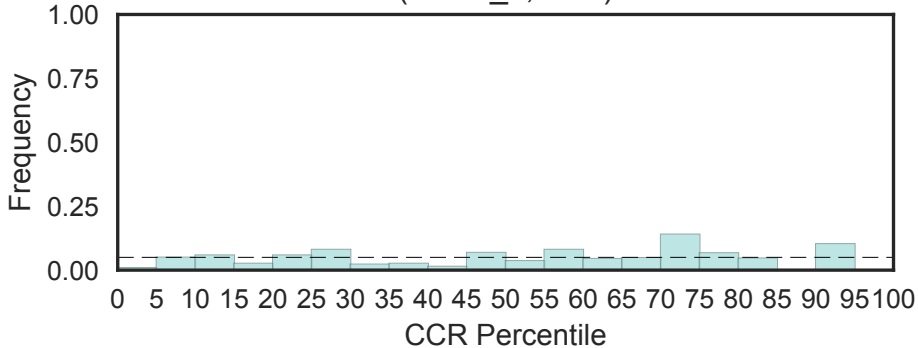

NADP oxidoreductase coenzyme F420-dependent  
(F420\_oxidored, N=12)

Fisher's OR: 0; Bonferroni p-val: 1

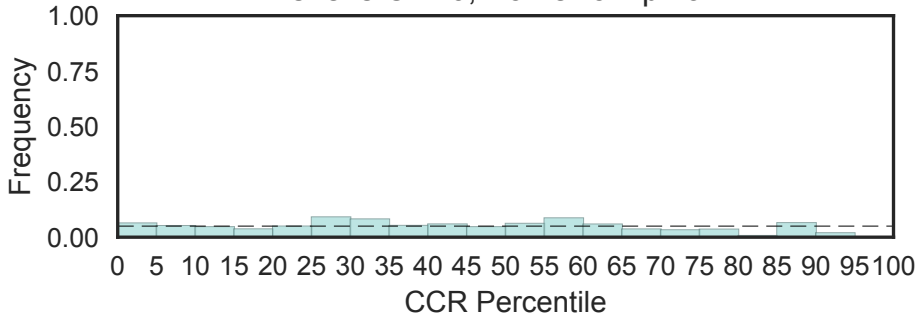

F5/8 type C domain  
(F5\_F8\_type\_C, N=27)  
Fisher's OR: 0.26; Bonferroni p-val: 1

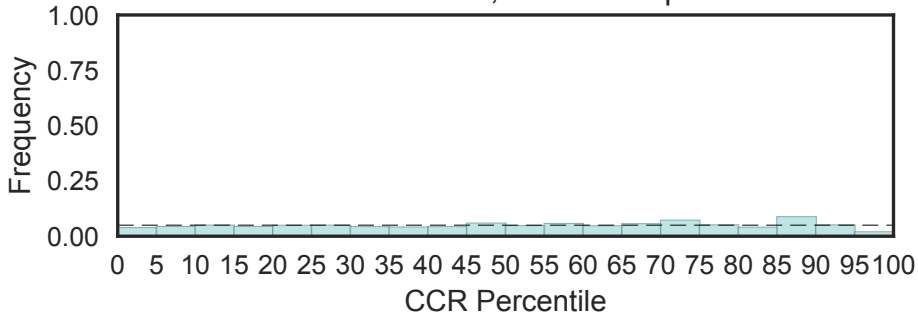

FERM adjacent (FA)  
(FA, N=12)

Fisher's OR: 0; Bonferroni p-val: 1

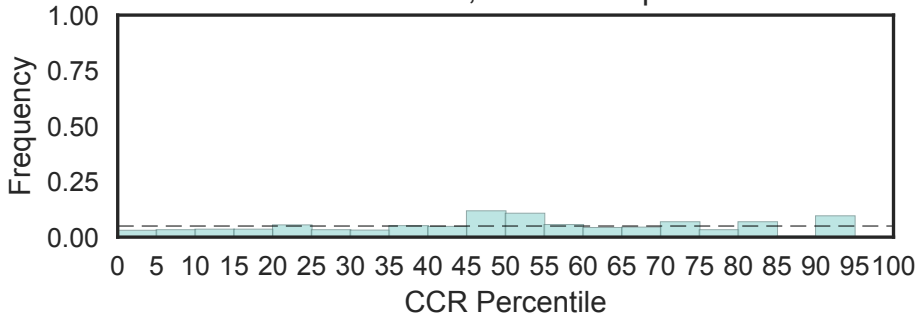

Fumarylacetoacetate (FAA) hydrolase family  
(FAA\_hydrolase, N=5)

Fisher's OR: 0; Bonferroni p-val: 1

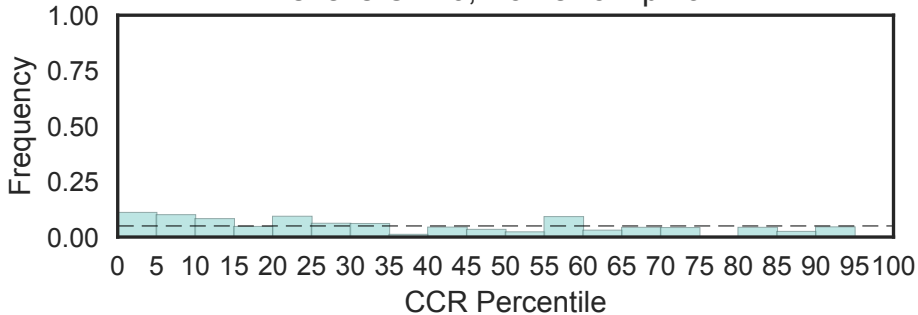

Fumarylacetoacetase N-terminal  
(FAA\_hydrolase\_N, N=1)

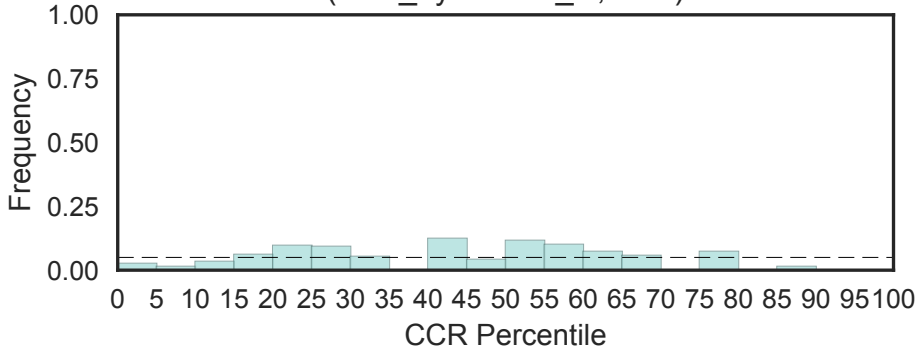



FACT complex subunit SPT16 N-terminal lobe domain  
(FACT-Spt16\_Nlob, N=1)

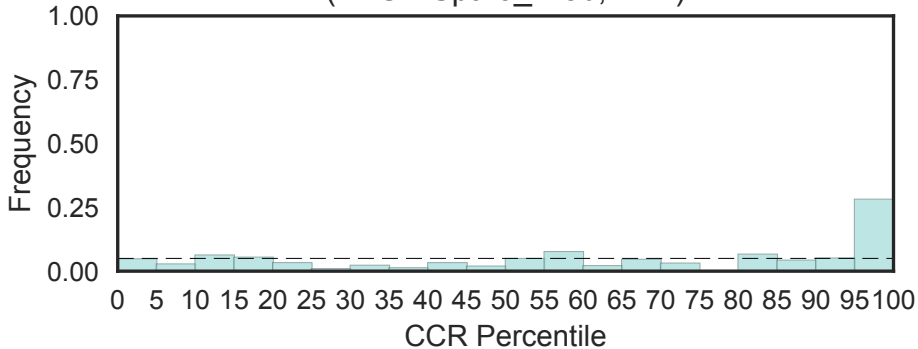

FAD linked oxidases, C-terminal domain  
(FAD-oxidase\_C, N=3)

Fisher's OR: 1.21; Bonferroni p-val: 1

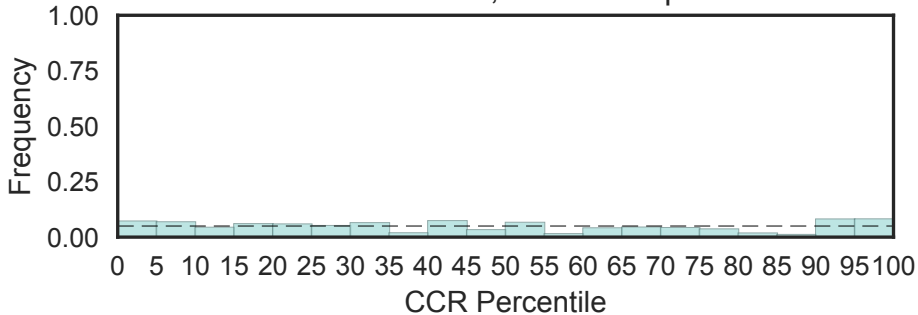

FAD binding domain  
(FAD\_binding\_1, N=6)

Fisher's OR: 0.237; Bonferroni p-val: 1

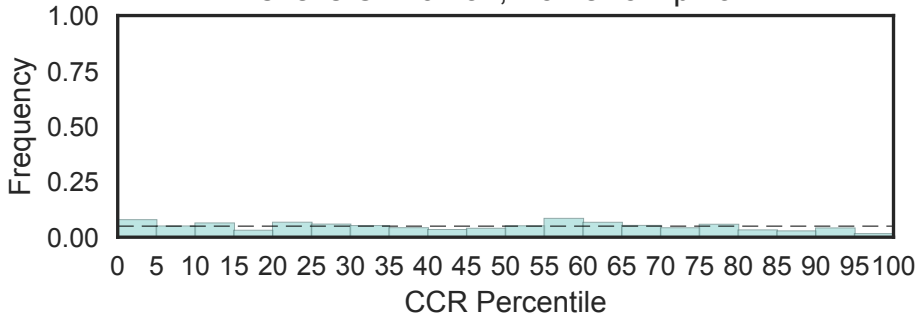

FAD binding domain  
(FAD\_binding\_2, N=15)  
Fisher's OR: 1.22; Bonferroni p-val: 1

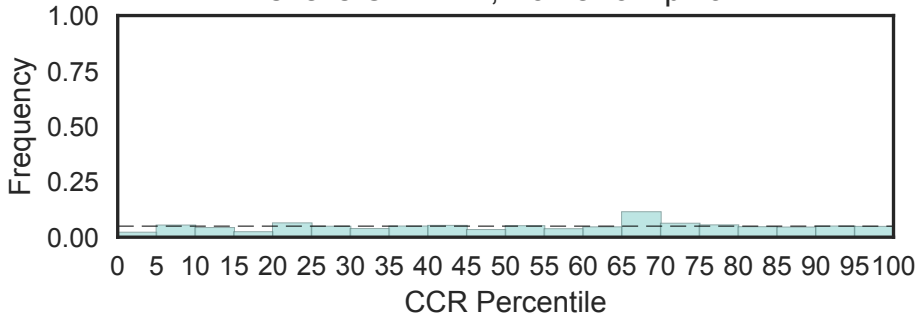

FAD binding domain  
(FAD\_binding\_3, N=12)  
Fisher's OR: 1.3; Bonferroni p-val: 1

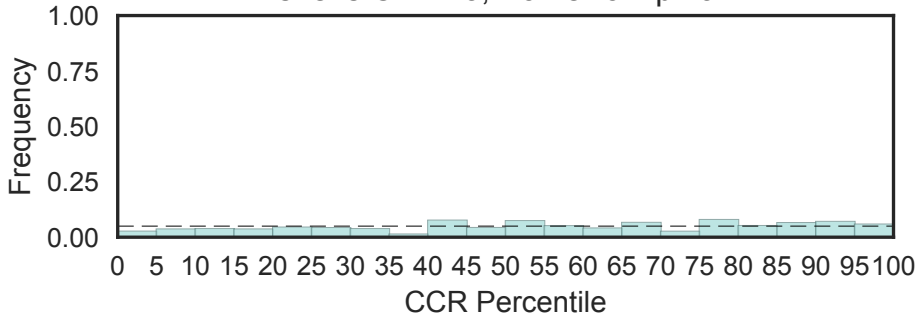

FAD binding domain  
(FAD\_binding\_4, N=4)

Fisher's OR: 2.01; Bonferroni p-val: 1

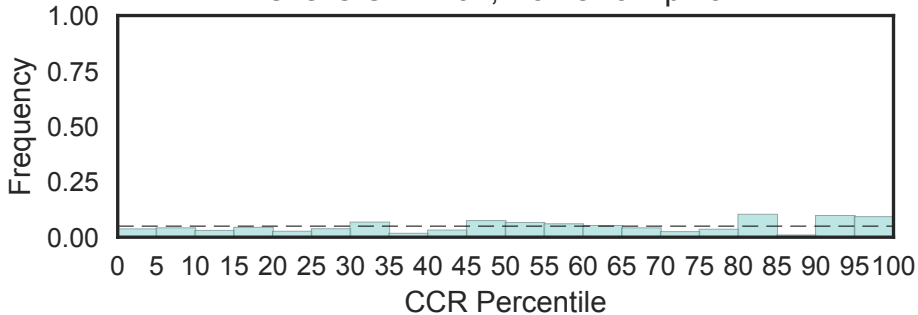

FAD binding domain in molybdopterin dehydrogenase  
(FAD\_binding\_5, N=2)

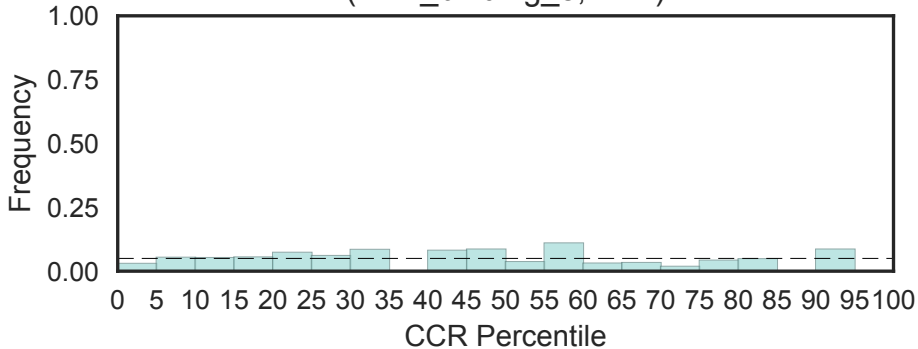

Oxidoreductase FAD-binding domain  
(FAD\_binding\_6, N=5)

Fisher's OR: 0; Bonferroni p-val: 1

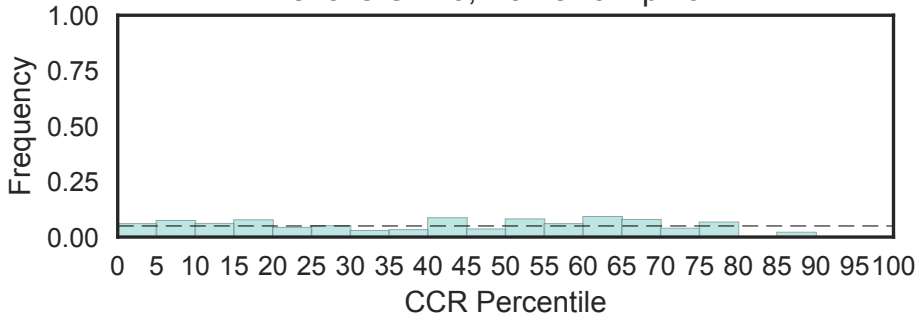



FAD binding domain of DNA photolyase  
(FAD\_binding\_7, N=2)

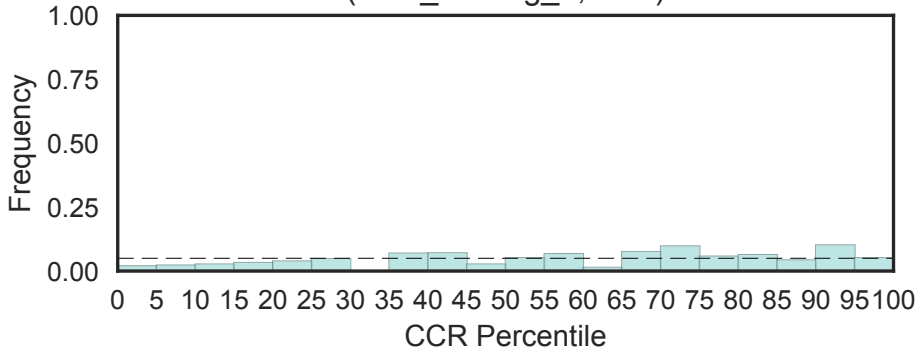

FAD-binding domain  
(FAD\_binding\_8, N=5)

Fisher's OR: 0; Bonferroni p-val: 1

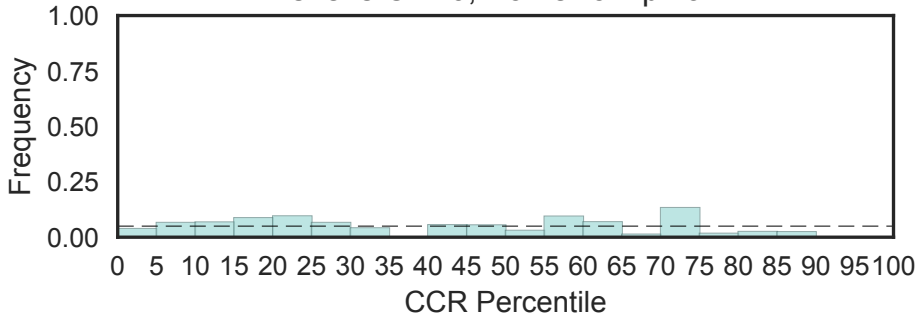

FAD dependent oxidoreductase  
(FAD\_oxidored, N=3)

Fisher's OR: 0; Bonferroni p-val: 1

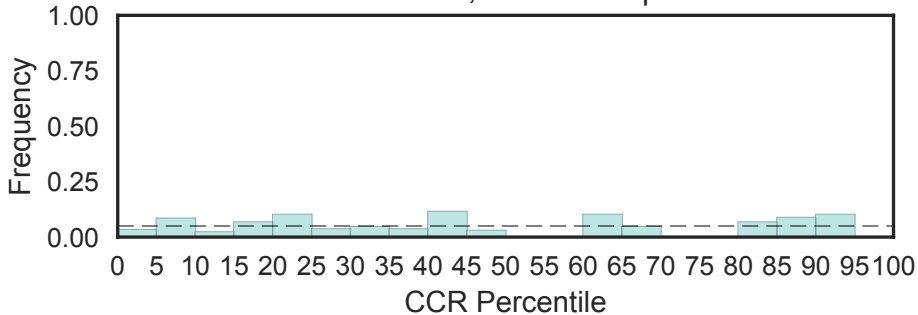

Fas apoptotic inhibitory molecule (FAIM1)  
(FAIM1, N=1)

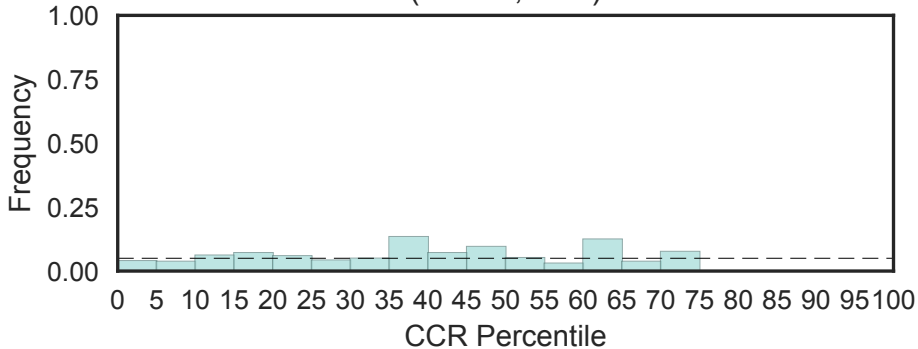

FAM101 family  
(FAM101, N=2)

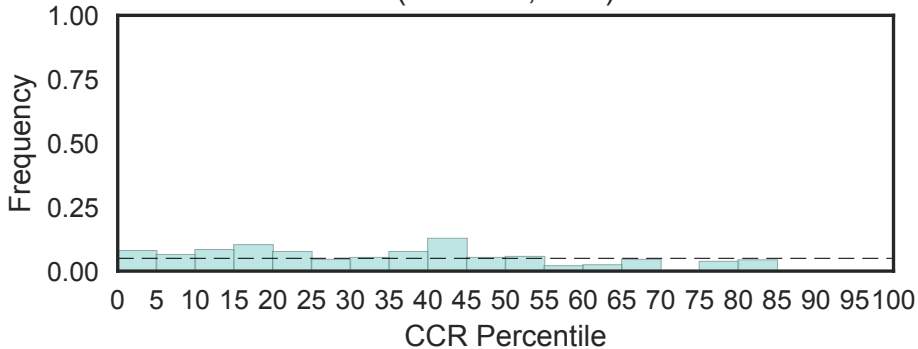

Family 104  
(FAM104, N=1)

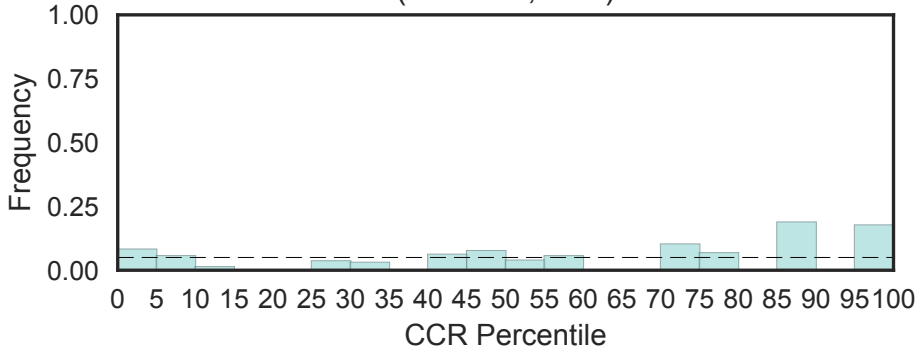

Centrosome-associated C terminus  
(FAM110\_C, N=4)

Fisher's OR: 0.901; Bonferroni p-val: 1

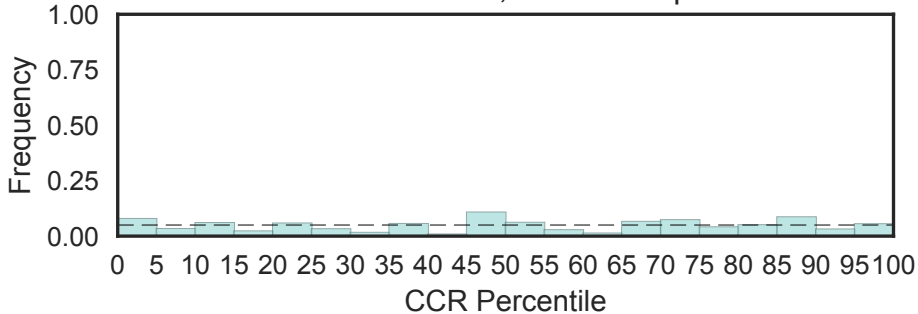

Centrosome-associated N terminus  
(FAM110\_N, N=4)

Fisher's OR: 3.49; Bonferroni p-val: 1

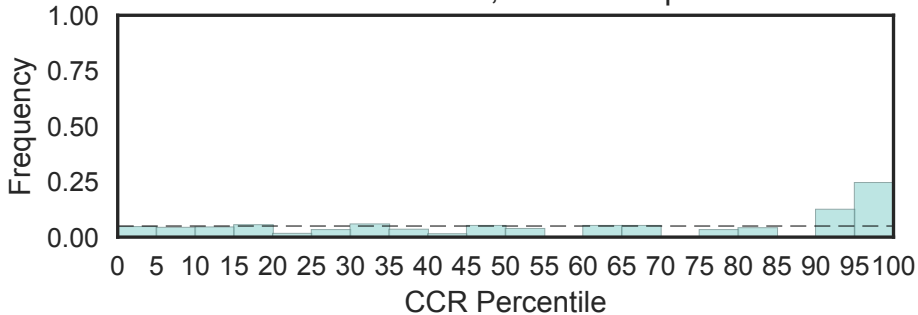



Protein Family FAM117  
(FAM117, N=3)

Fisher's OR: 0.655; Bonferroni p-val: 1

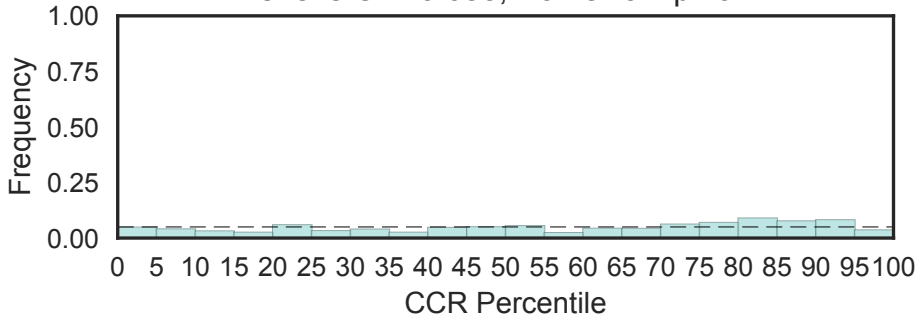

FAM124 family  
(FAM124, N=2)

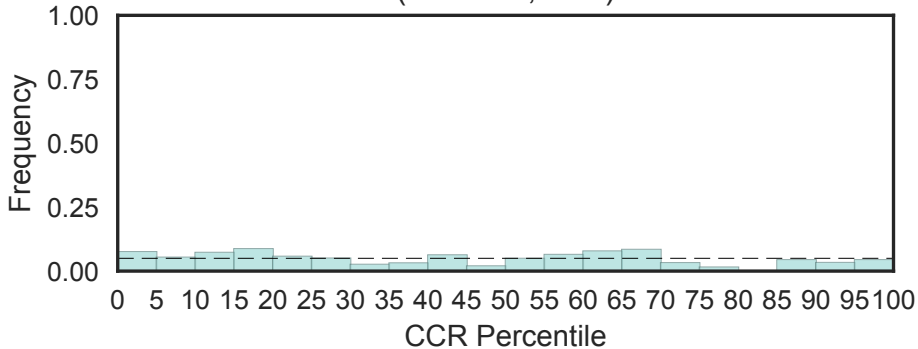

Putative cell signalling  
(FAM131, N=3)

Fisher's OR: 0.987; Bonferroni p-val: 1

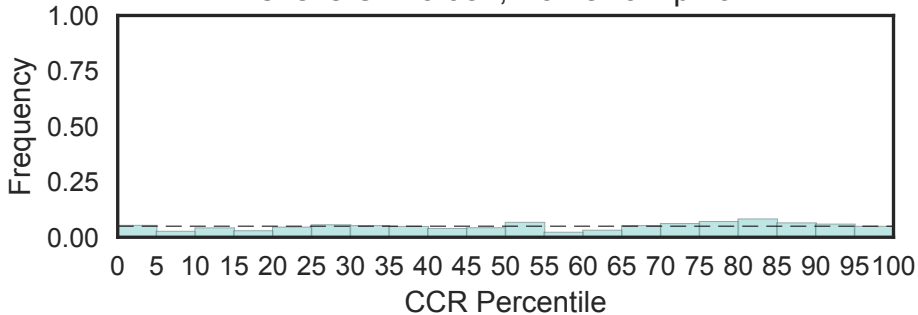

FAM150 family  
(FAM150, N=2)

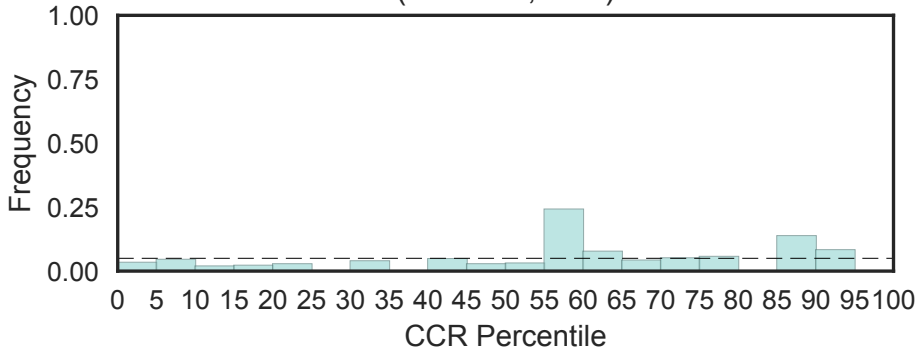

FAM163 family  
(FAM163, N=2)

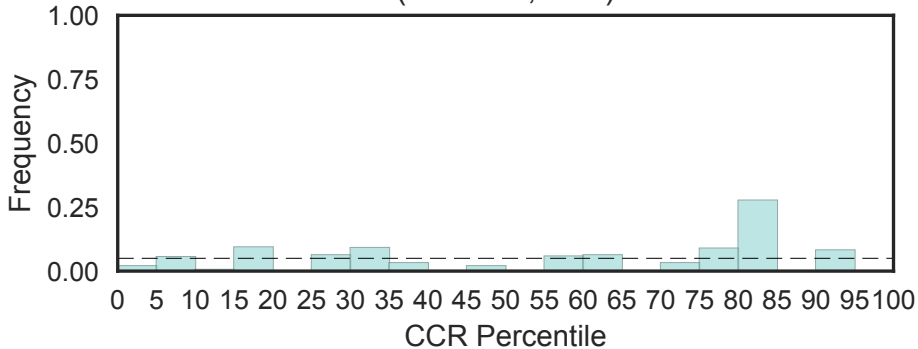

FAM165 family  
(FAM165, N=1)

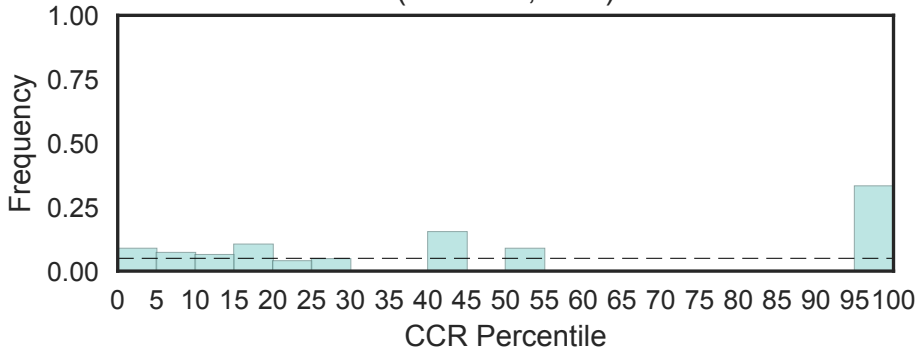

FAM167  
(FAM167, N=2)

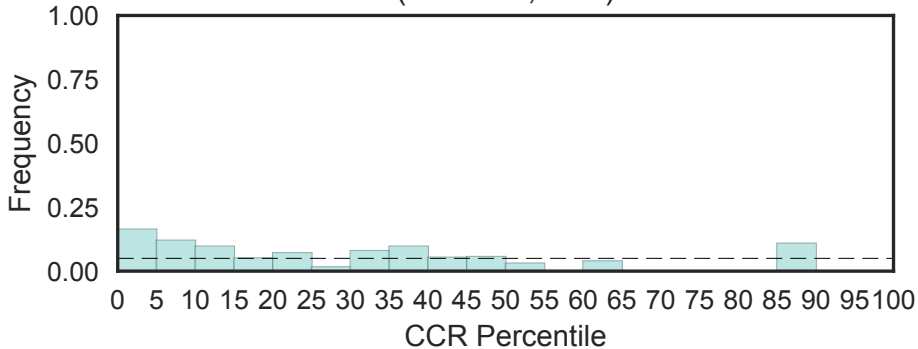

FAM176 family  
(FAM176, N=3)

Fisher's OR: 0; Bonferroni p-val: 1

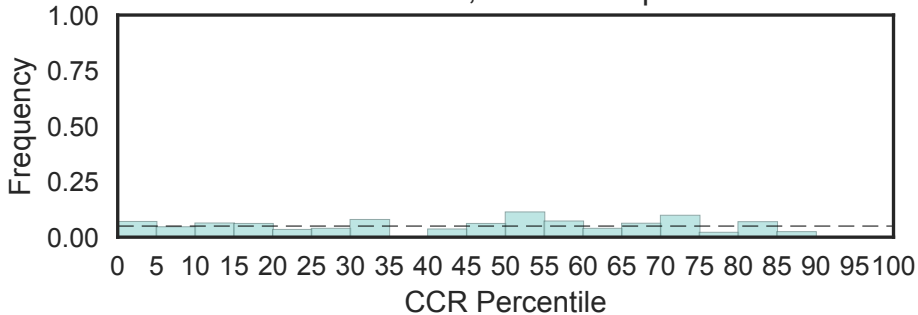



FAM177 family  
(FAM177, N=2)

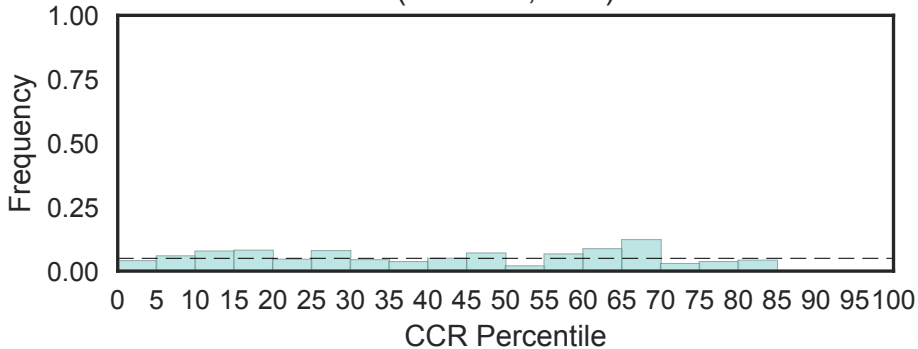

Family of unknown function, FAM178  
(FAM178, N=2)

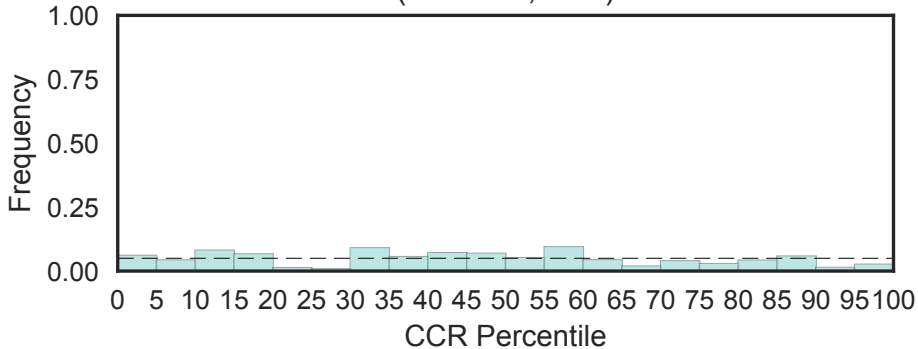

FAM180 family  
(FAM180, N=2)

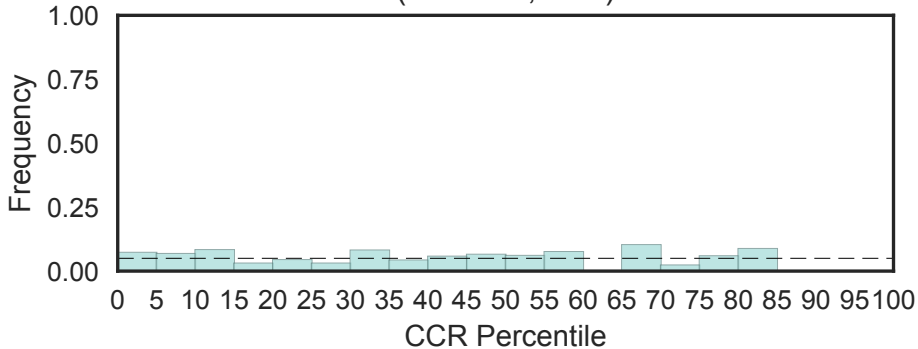

FAM181  
(FAM181, N=2)

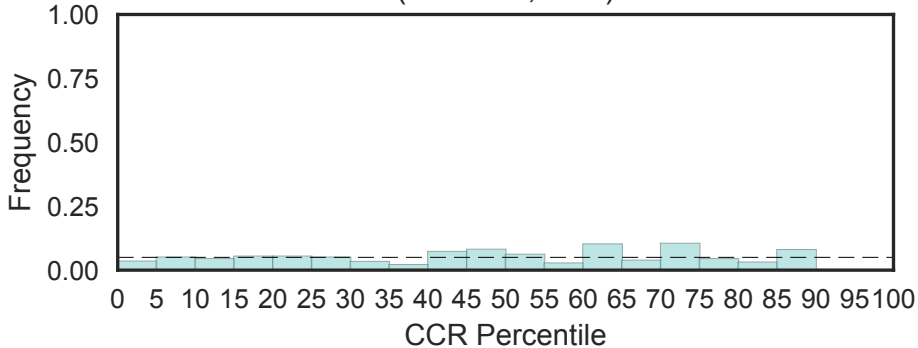

FAM183A and FAM183B related  
(FAM183, N=1)

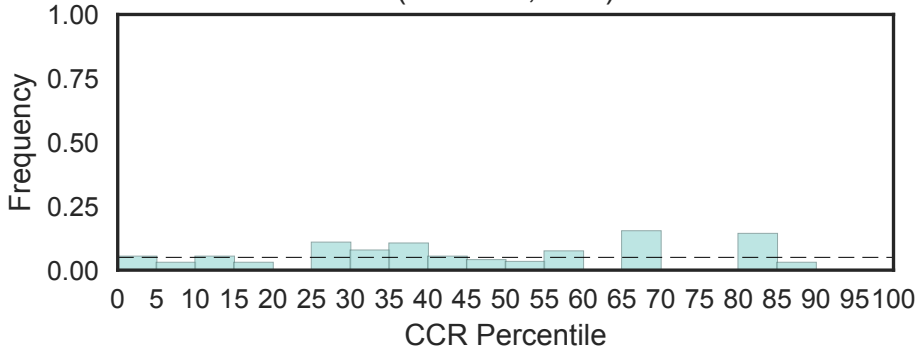

Family with sequence similarity 184, A and B  
(FAM184, N=2)

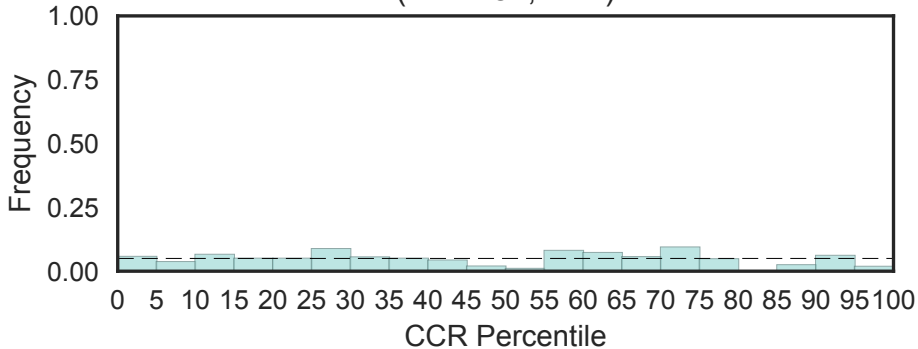

FAM193 family C-terminal  
(FAM193\_C, N=2)

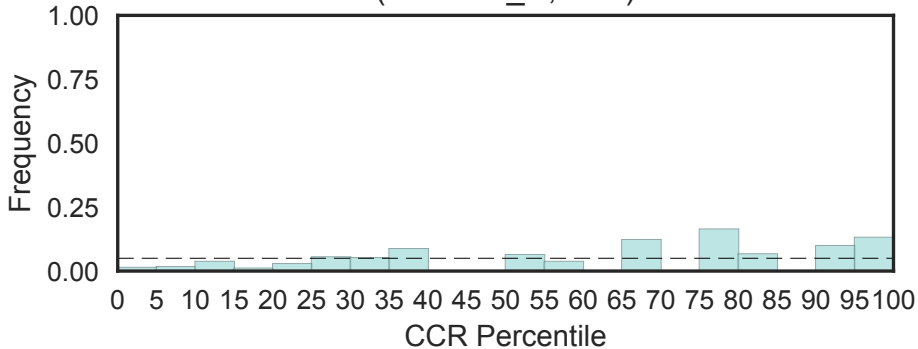

FAM194 protein  
(FAM194, N=3)

Fisher's OR: 0; Bonferroni p-val: 1

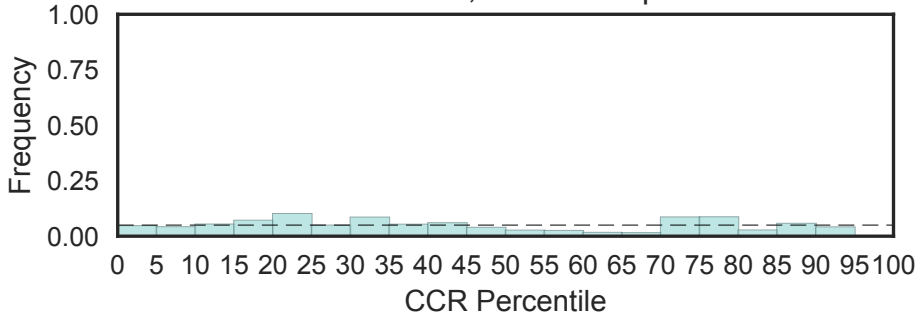



FAM195 family  
(FAM195, N=2)

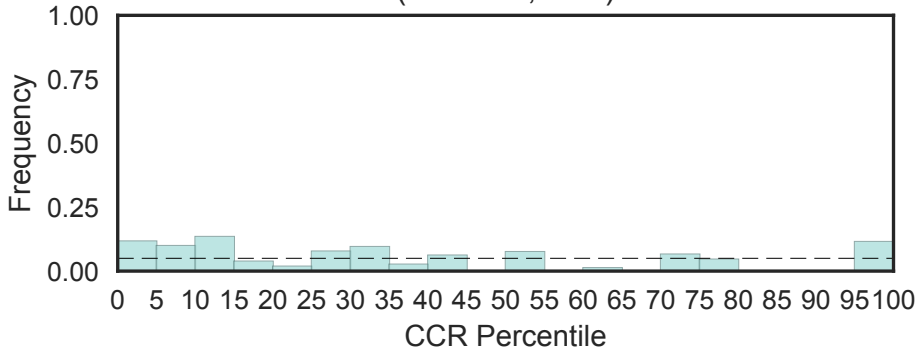

FAM196 family  
(FAM196, N=2)

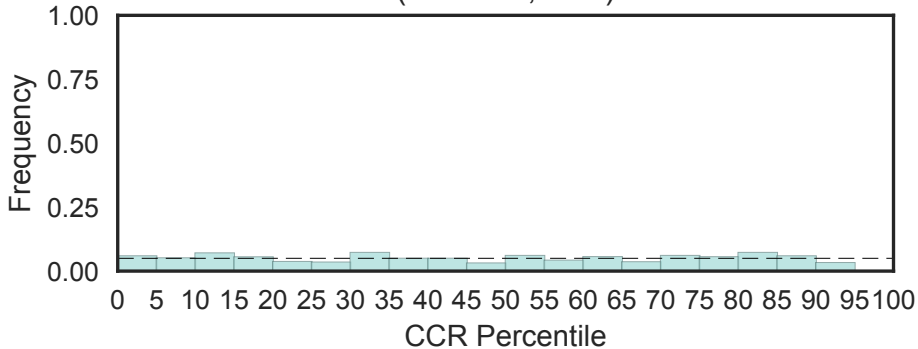

FAM198 protein  
(FAM198, N=2)

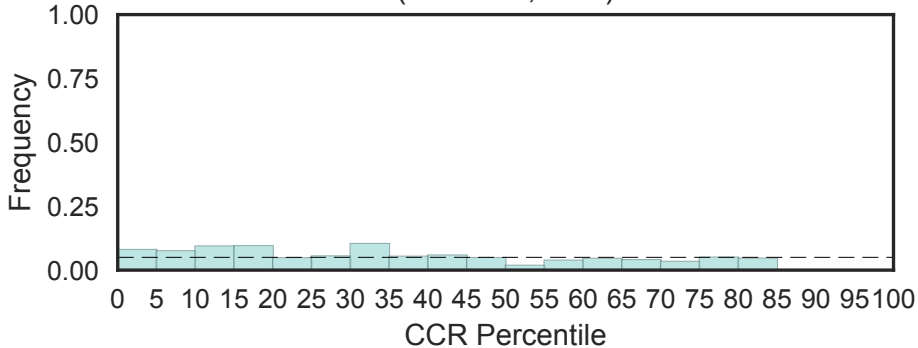

FAM209 family  
(FAM209, N=3)

Fisher's OR: 0; Bonferroni p-val: 1

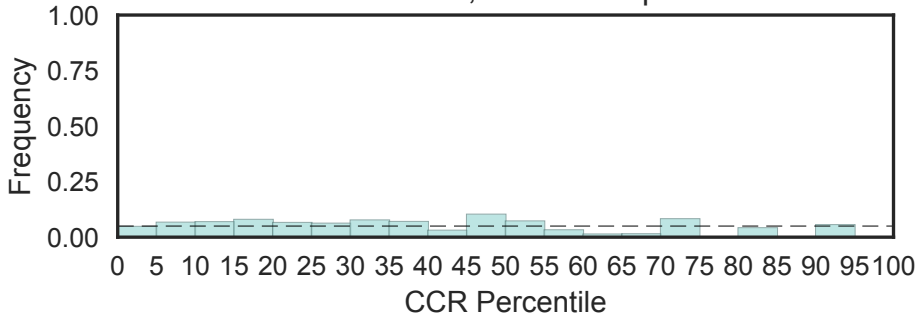

FAM212 family  
(FAM212, N=2)

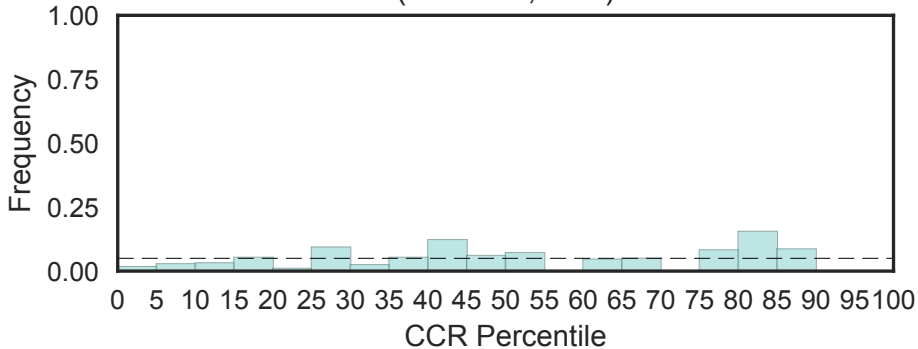

FAM216B protein family  
(FAM216B, N=2)

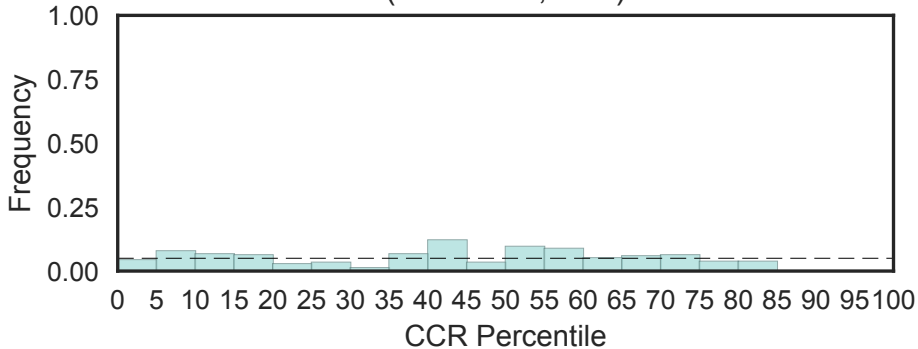

FAM217 family  
(FAM217, N=2)

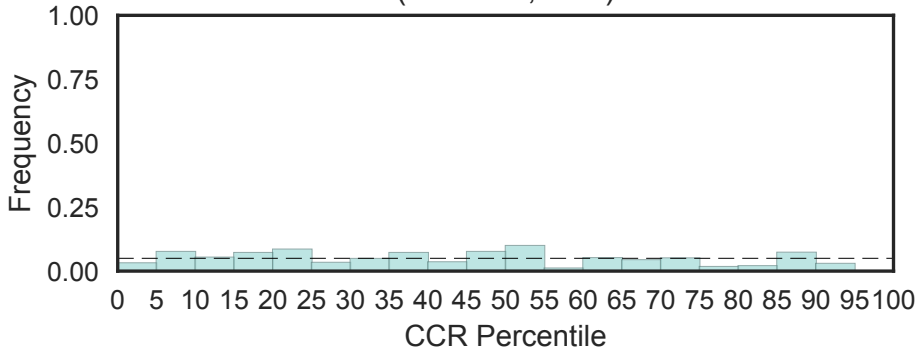

Protein family FAM219A  
(FAM219A, N=2)

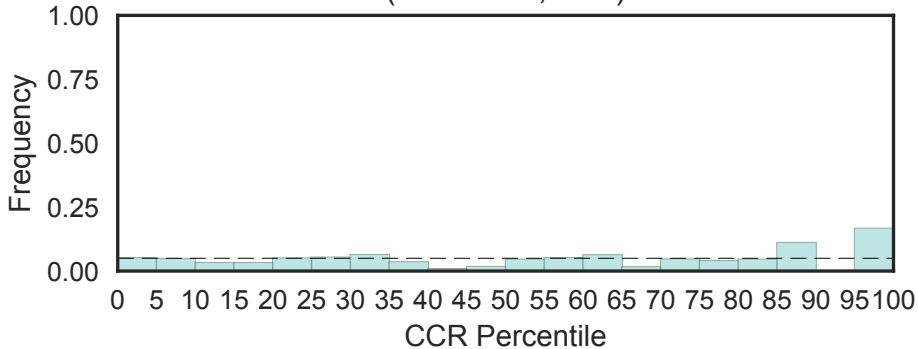



Protein FAM221A/B  
(FAM221, N=3)

Fisher's OR: 0; Bonferroni p-val: 1

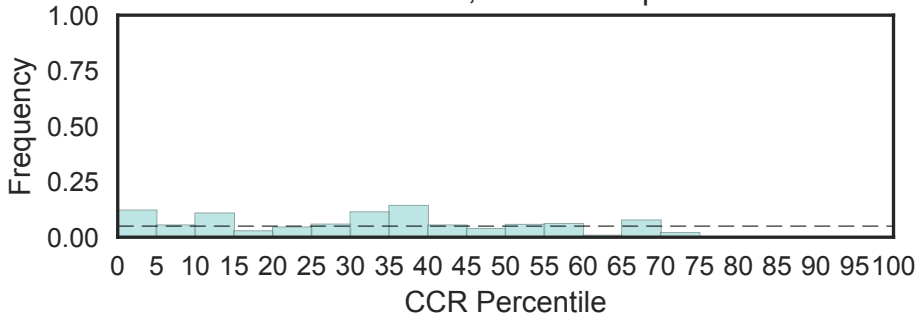

Protein family of FAM222A  
(FAM222A, N=2)

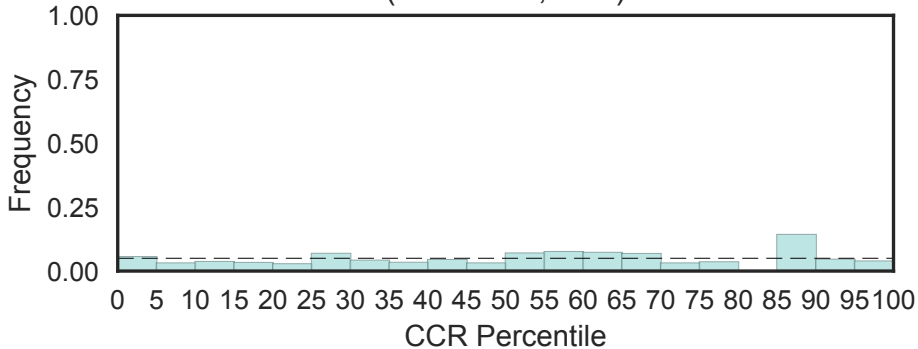

FAM24 family  
(FAM24, N=2)

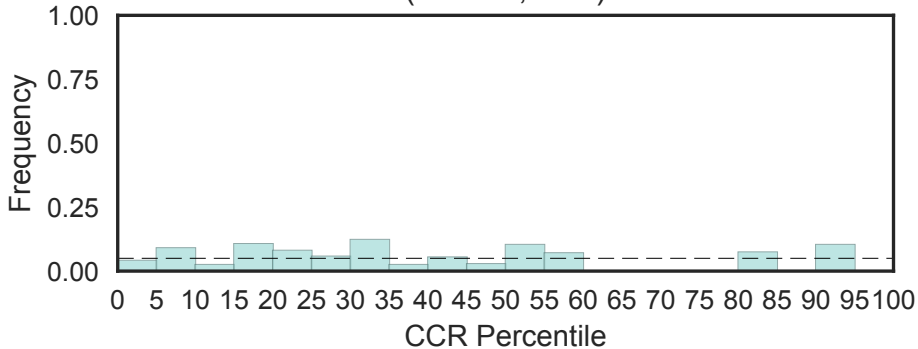

FAM47 family  
(FAM47, N=2)

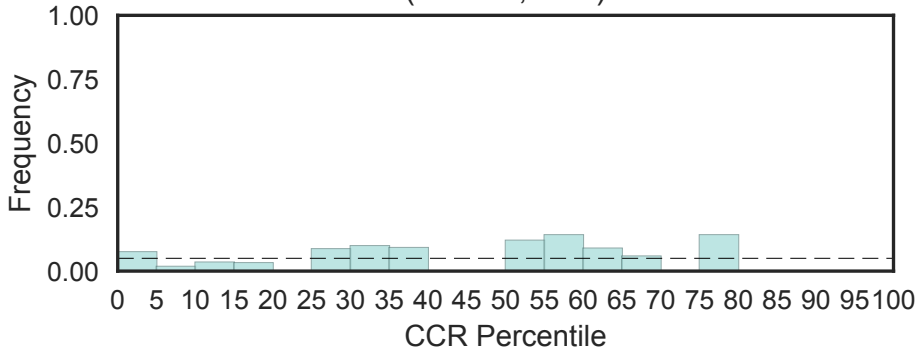

Family of FAM53  
(FAM53, N=3)

Fisher's OR: 0; Bonferroni p-val: 1

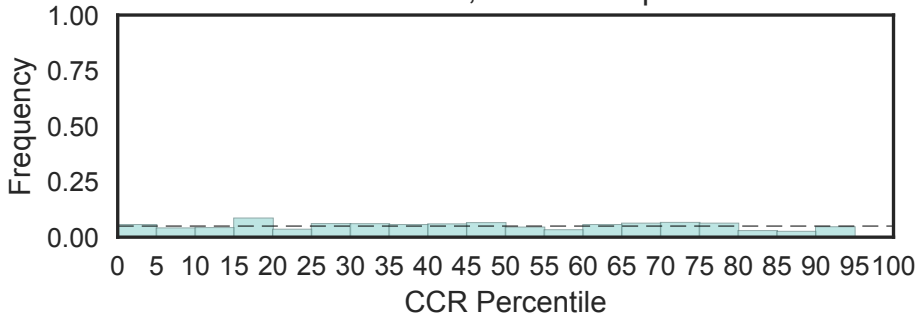

Protein Family FAM60A  
(FAM60A, N=1)

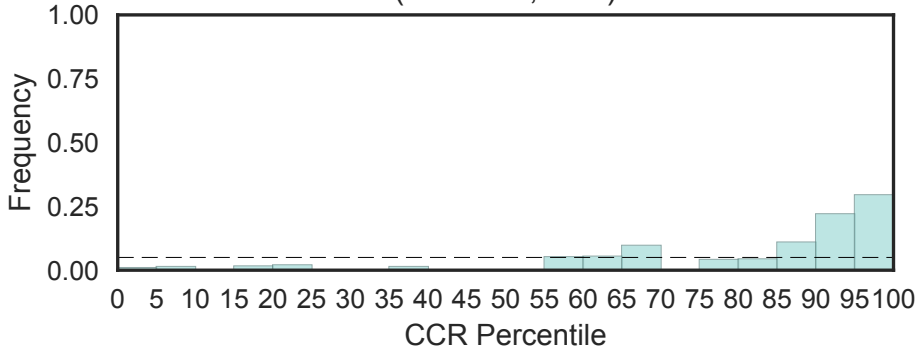

FAM70 protein  
(FAM70, N=1)

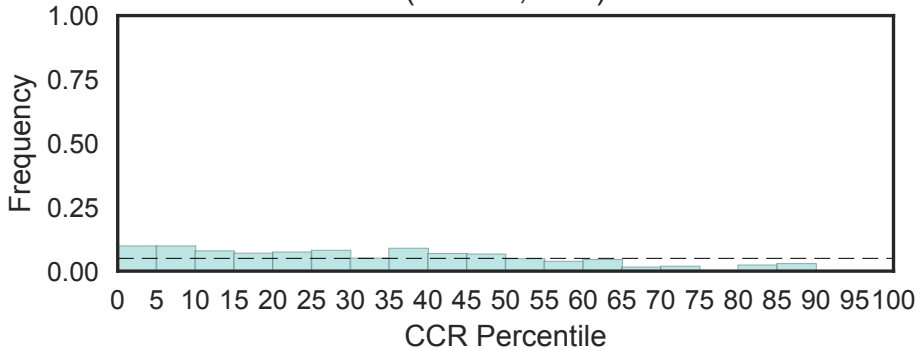

FAM75 family  
(FAM75, N=11)

Fisher's OR: 0; Bonferroni p-val: 1

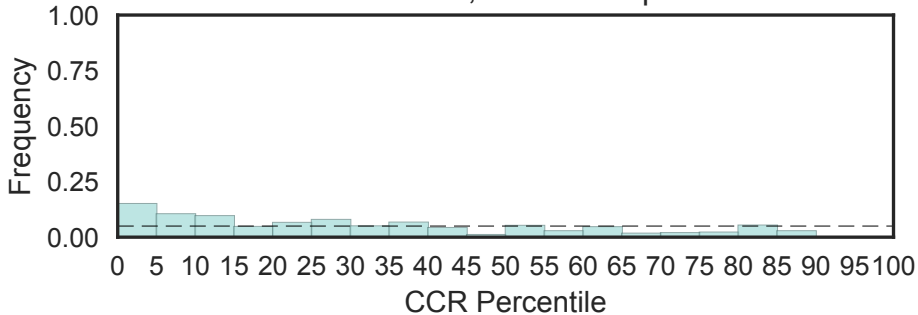



FAM76 protein  
(FAM76, N=2)

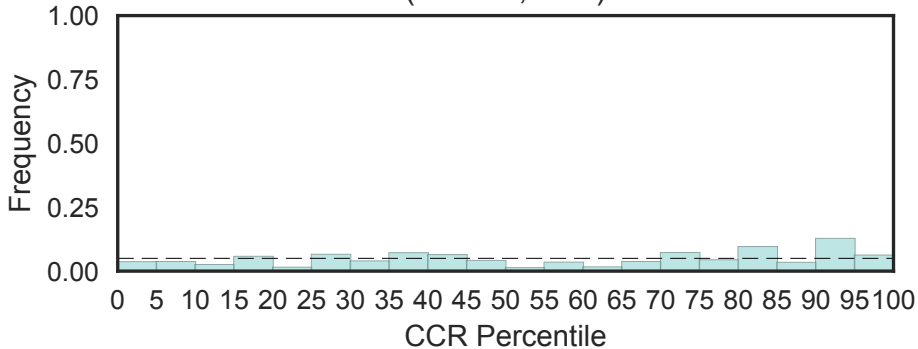

FAM91 C-terminus  
(FAM91\_C, N=1)

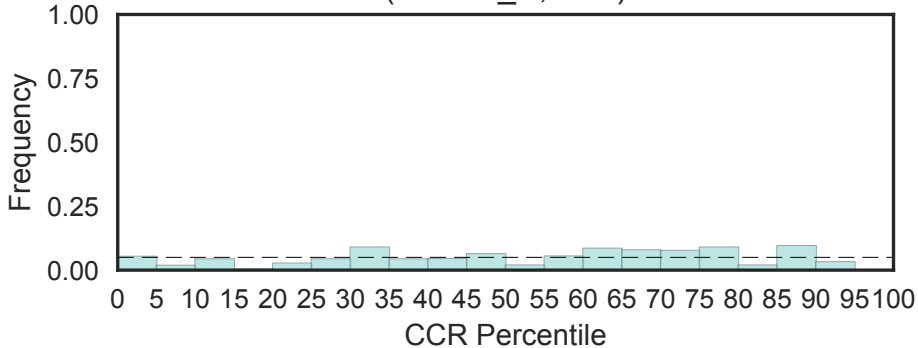

FAM91 N-terminus  
(FAM91\_N, N=1)

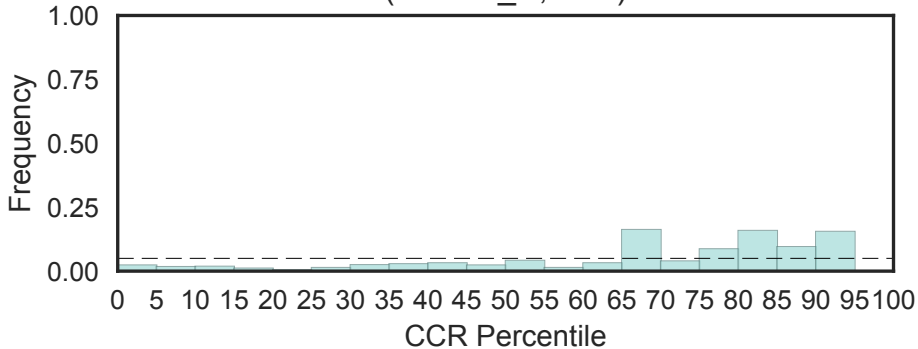

FAM92 protein  
(FAM92, N=2)

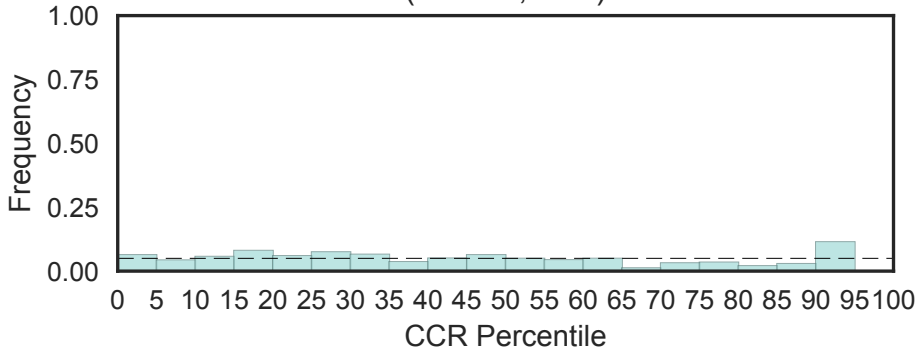

# Fanconi anemia-associated (FANCAA, N=1)

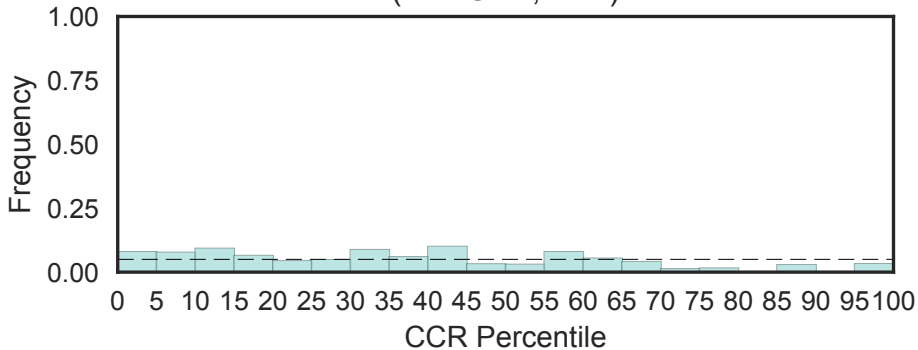

FAAP20 FANCA interaction domain  
(FANCA\_interact, N=1)

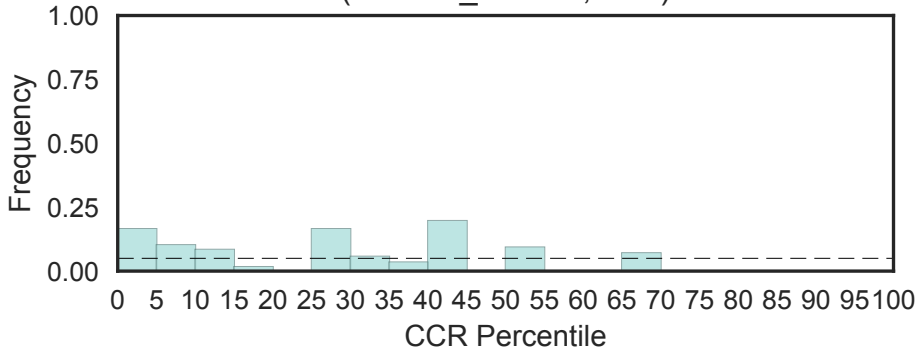

FANCD2 opposite strand protein  
(FANCD2OS, N=1)

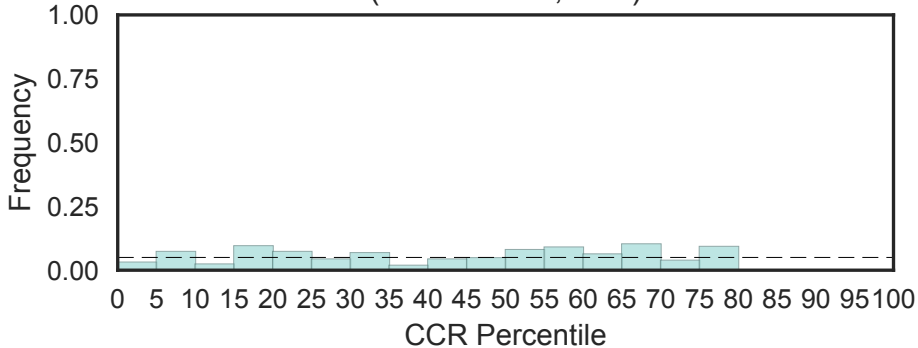

Fanconi anemia group F protein (FANCF)  
(FANCF, N=2)

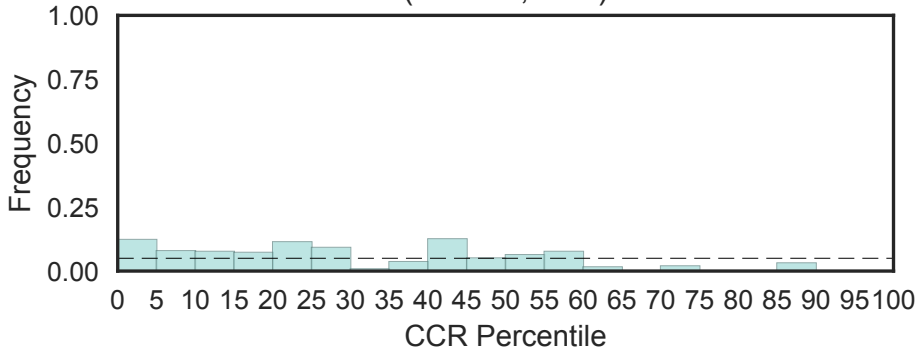



FANCI helical domain 1  
(FANCI\_HD1, N=1)

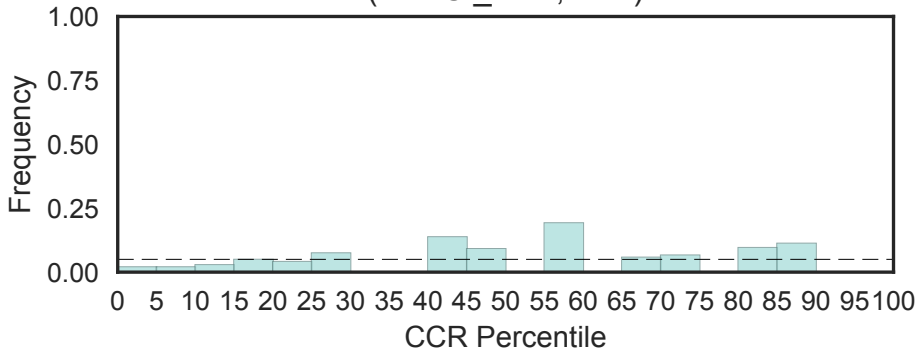

FANCI helical domain 2  
(FANCI\_HD2, N=1)

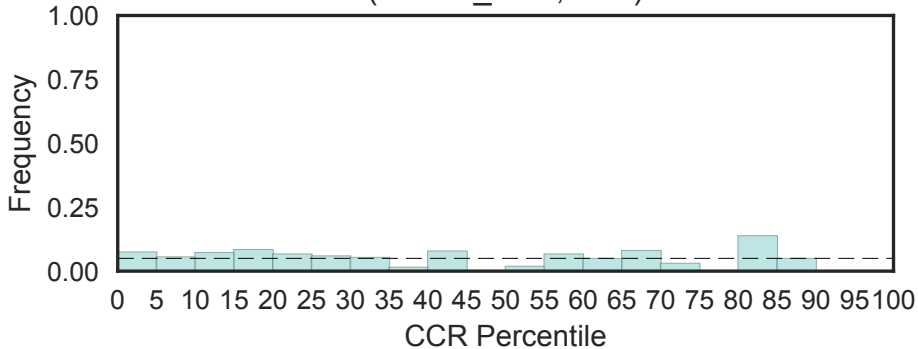

FANCI solenoid 1  
(FANCI\_S1, N=1)

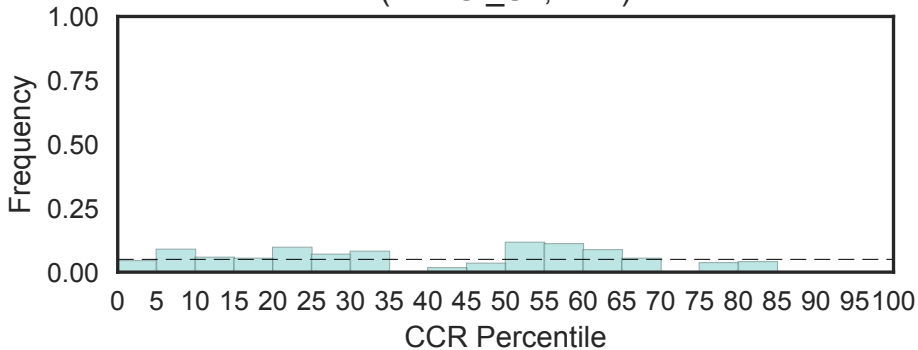

FANCI solenoid 1 cap  
(FANCI\_S1-cap, N=1)

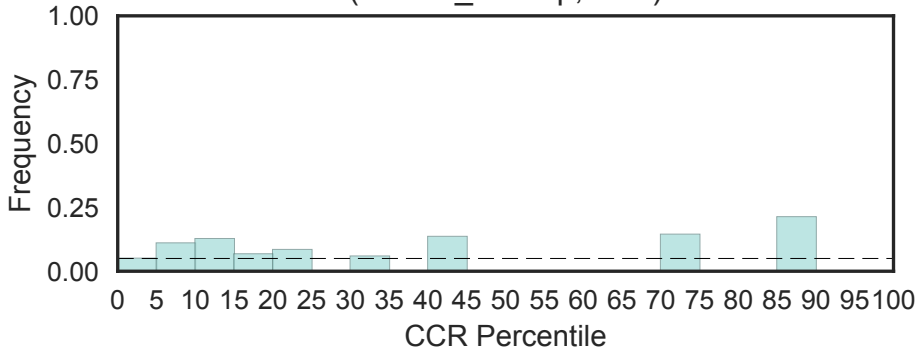

FANCI solenoid 2  
(FANCI\_S2, N=1)

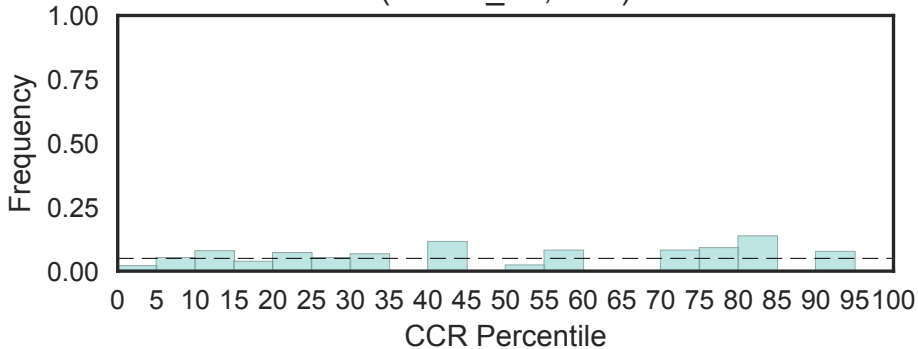

FANCI solenoid 3  
(FANCI\_S3, N=1)

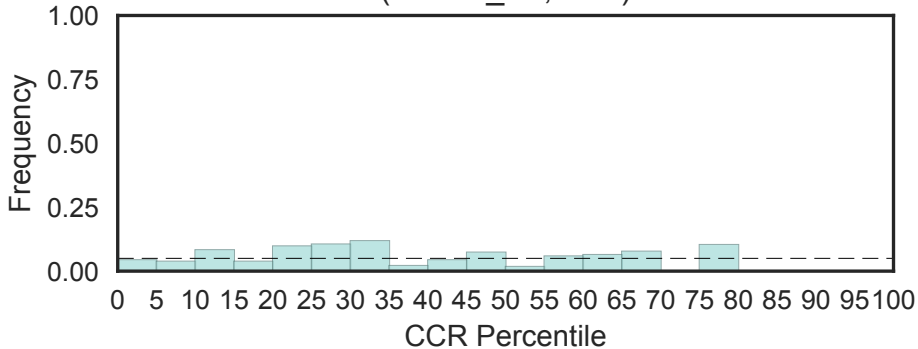

FANCI solenoid 4  
(FANCI\_S4, N=1)

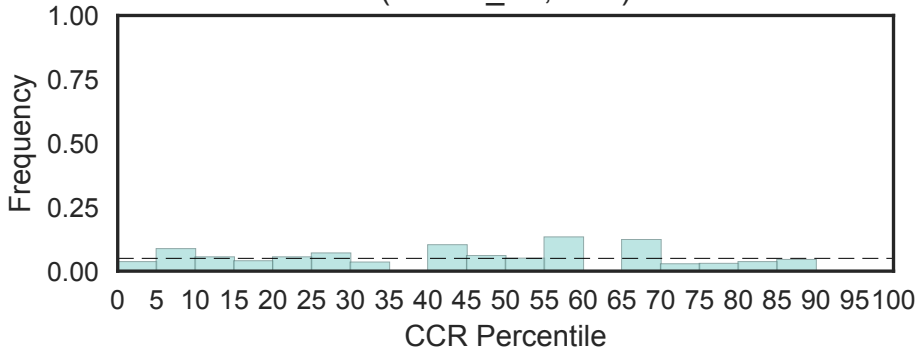

FANCL C-terminal domain  
(FANCL\_C, N=1)

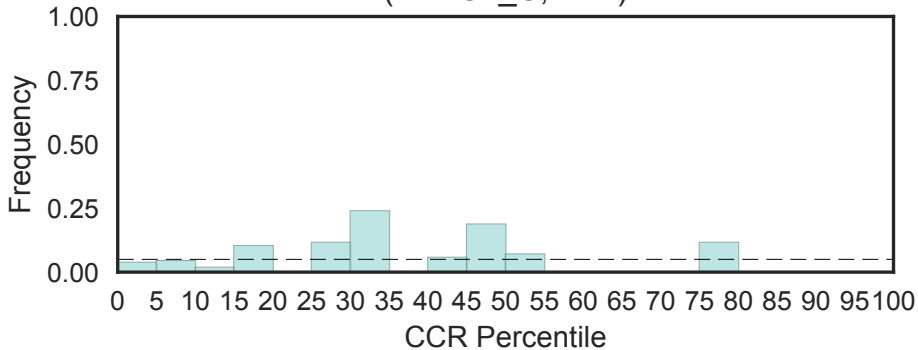



FANCM to MHF binding domain  
(FANCM-MHF\_bd, N=1)

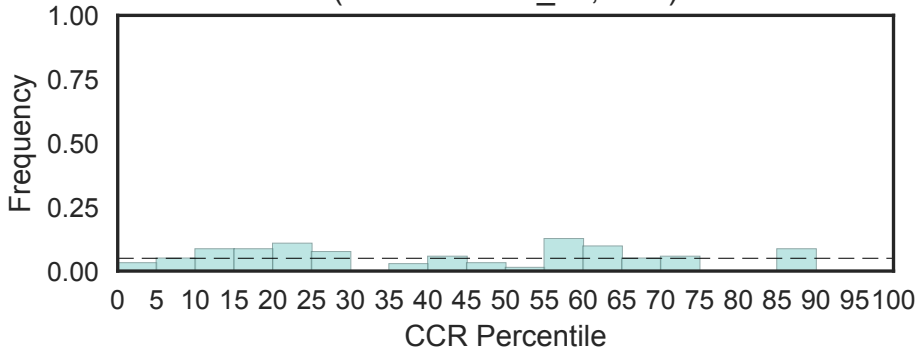

FAD dependent oxidoreductase central domain  
(FAO\_M, N=3)

Fisher's OR: 0; Bonferroni p-val: 1

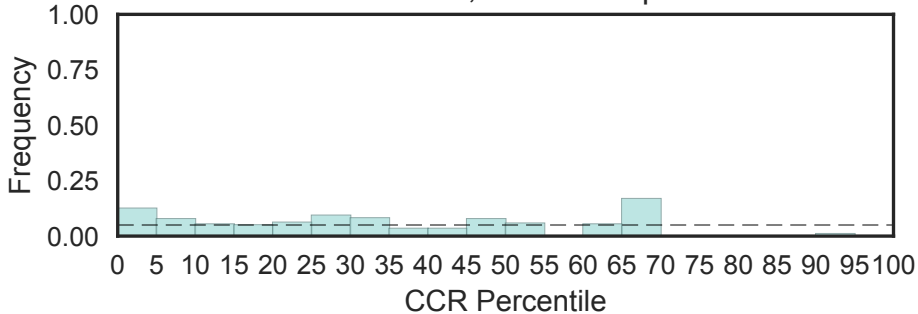

Domain of unknown function  
(FAP206, N=1)

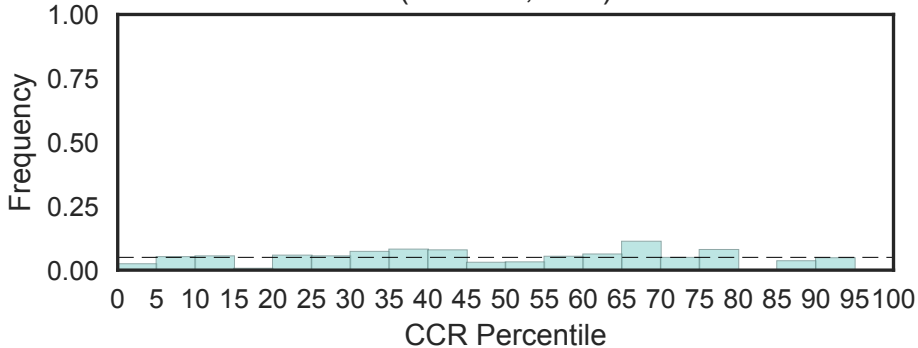

FAST kinase-like protein, subdomain 1  
(FAST\_1, N=6)

Fisher's OR: 0.676; Bonferroni p-val: 1

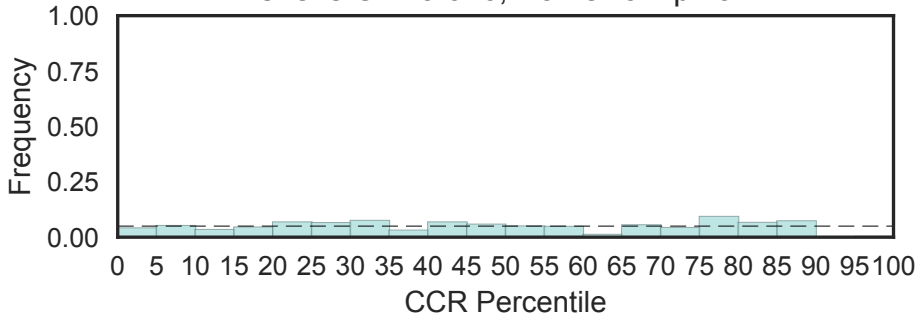

FAST kinase-like protein, subdomain 2  
(FAST\_2, N=6)

Fisher's OR: 0; Bonferroni p-val: 1

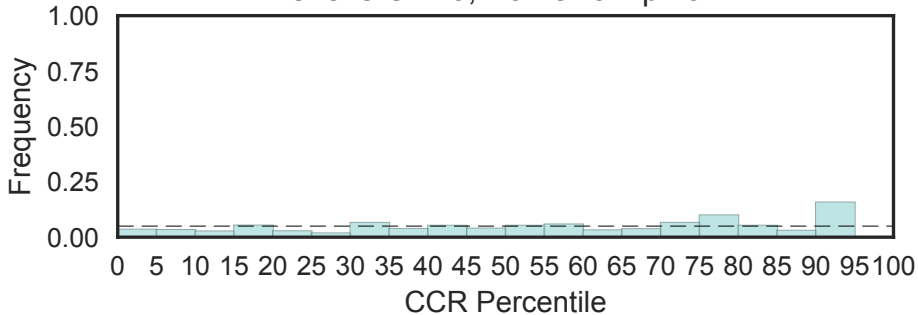

FAT domain  
(FAT, N=6)

Fisher's OR: 2.04; Bonferroni p-val: 1

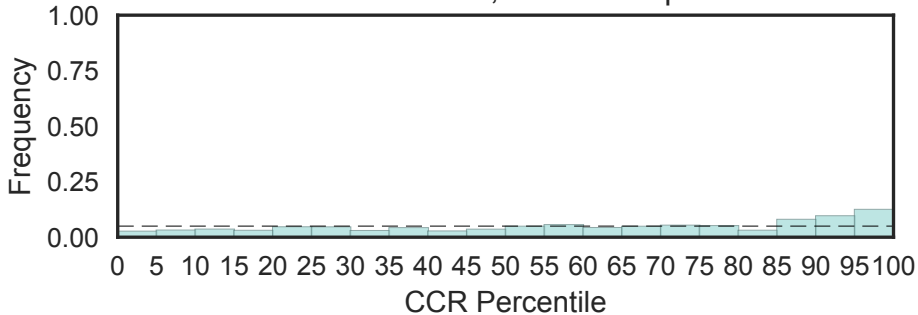

FATC domain  
(FATC, N=5)

Fisher's OR: 6.18; Bonferroni p-val: 1

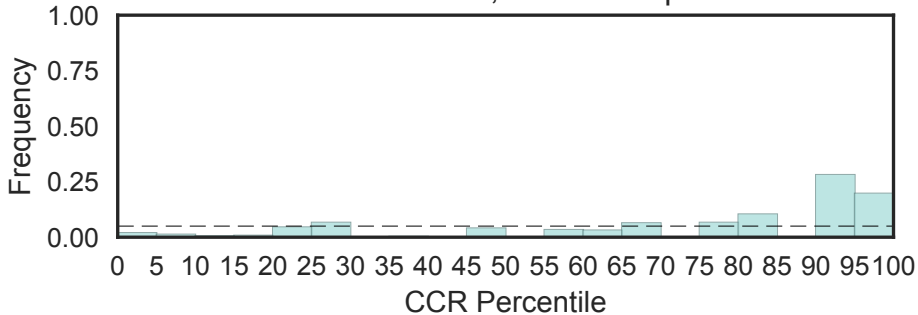

Fanconi Anaemia group E protein FANCE  
(FA\_FANCE, N=1)

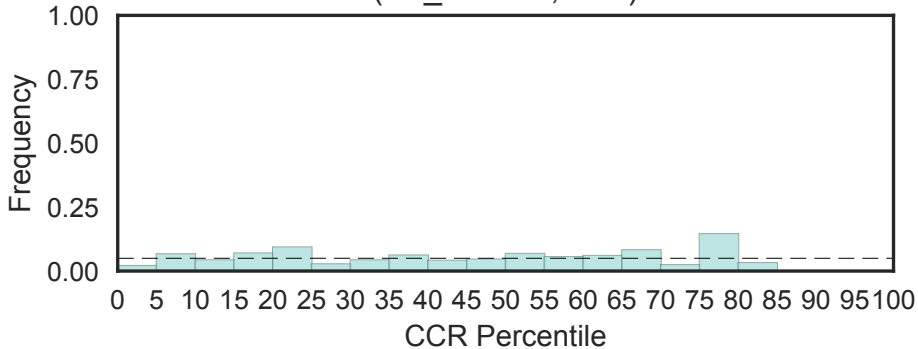



Fatty acid desaturase  
(FA\_desaturase, N=7)

Fisher's OR: 1.83; Bonferroni p-val: 1

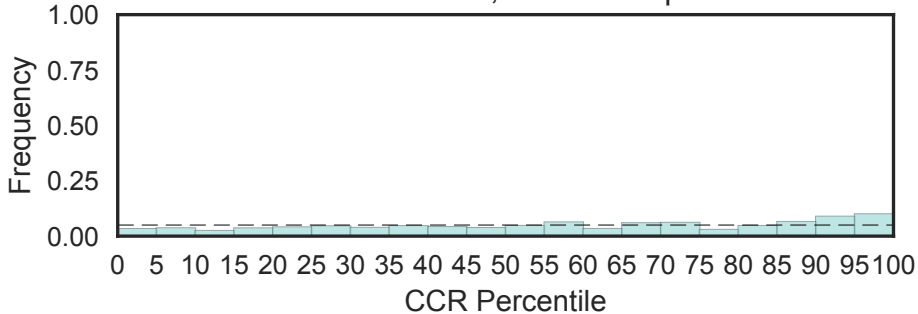

Fatty acid hydroxylase superfamily  
(FA\_hydroxylase, N=6)

Fisher's OR: 0; Bonferroni p-val: 1

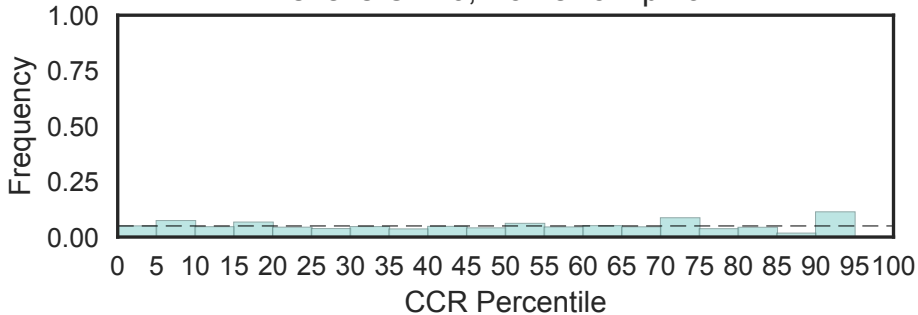

F-box associated region  
(FBA, N=9)

Fisher's OR: 0.161; Bonferroni p-val: 1

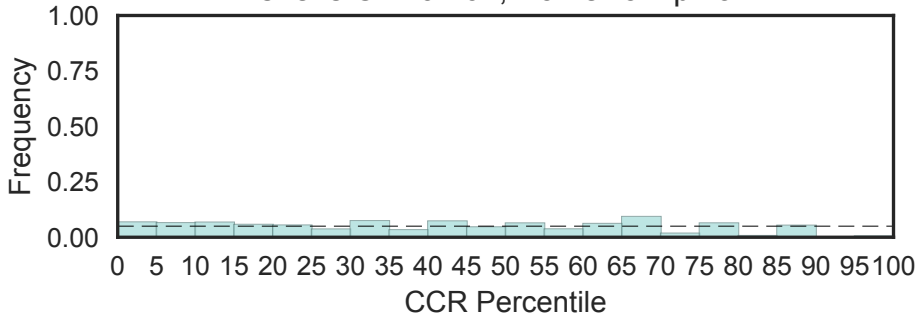

Fructose-1-6-bisphosphatase, N-terminal domain  
(FBPase, N=2)

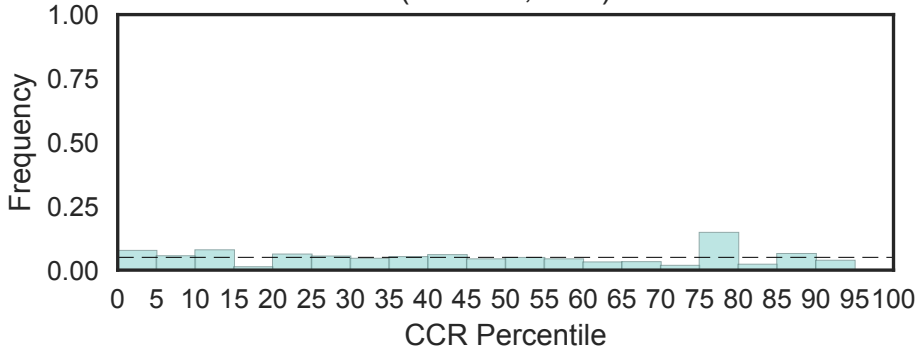

Fes/CIP4, and EFC/F-BAR homology domain  
(FCH, N=18)

Fisher's OR: 3.89; Bonferroni p-val: 0.648

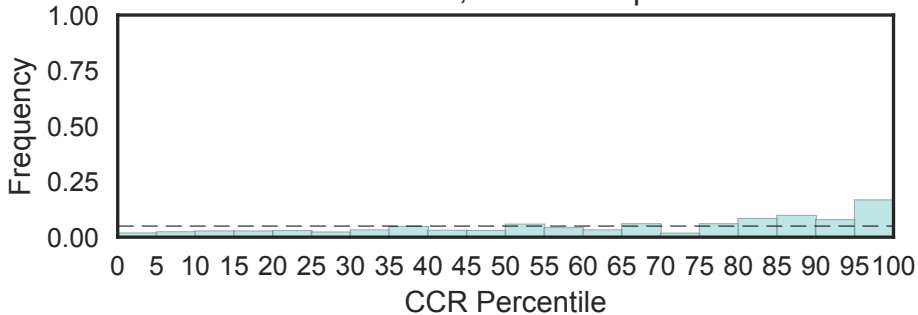

FCP1, C-terminal  
(FCP1\_C, N=1)

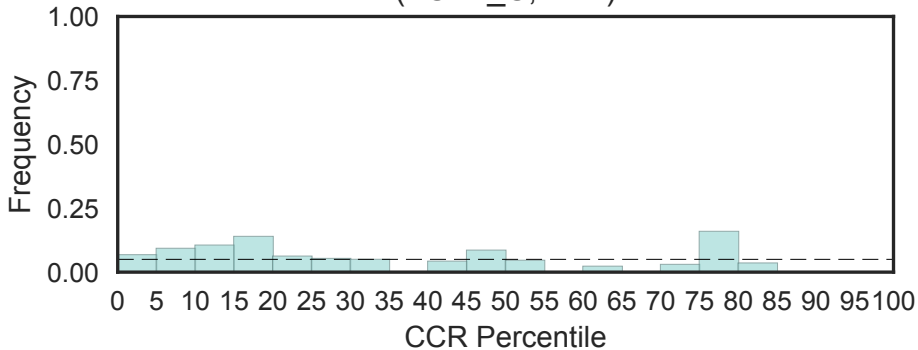

Follicular dendritic cell secreted peptide  
(FDC-SP, N=1)

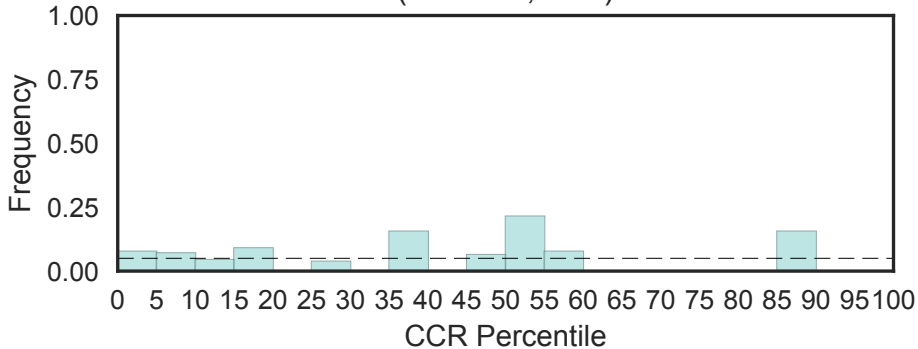

FDF domain  
(FDF, N=3)

Fisher's OR: 2.49; Bonferroni p-val: 1

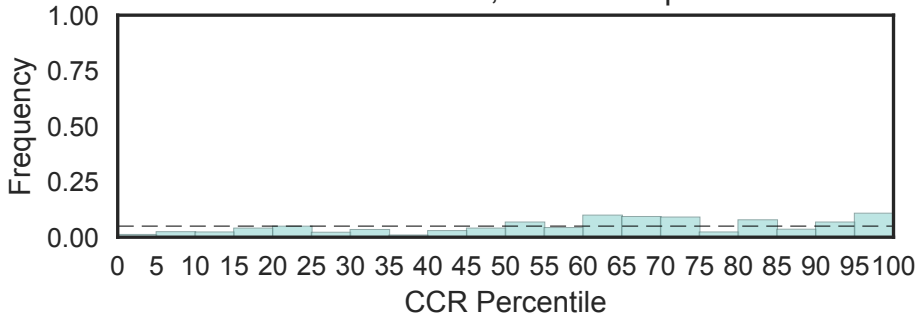



Ferredoxin-fold anticodon binding domain  
(FDX-ACB, N=2)

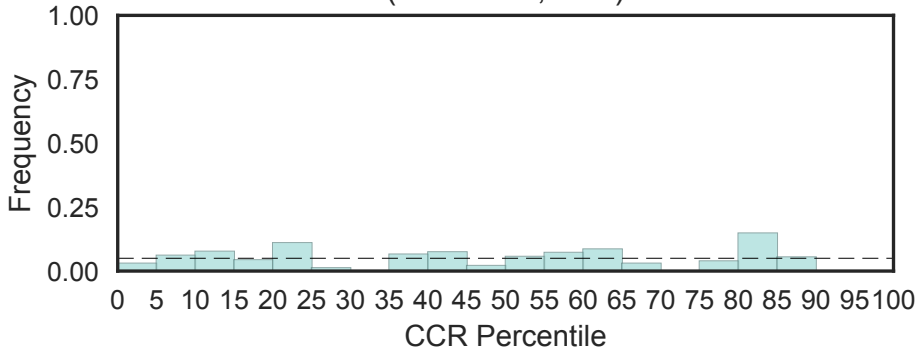

FERM C-terminal PH-like domain  
(FERM\_C, N=25)  
Fisher's OR: 0.92; Bonferroni p-val: 1

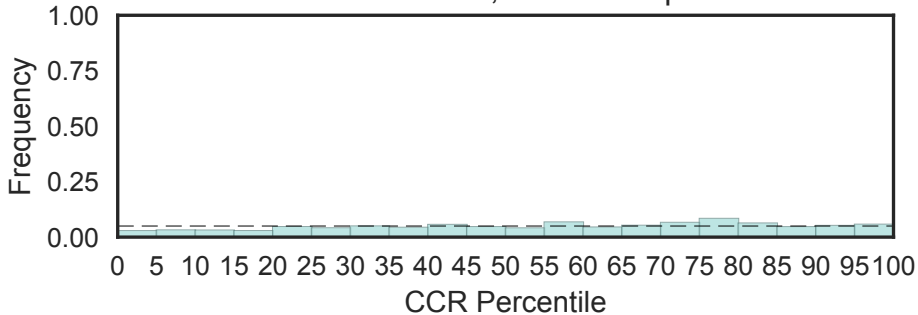

FERM central domain  
(FERM\_M, N=44)

Fisher's OR: 0.818; Bonferroni p-val: 1

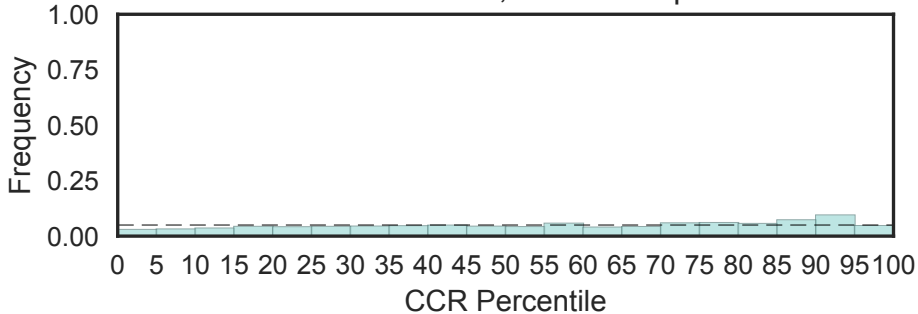

FERM N-terminal domain  
(FERM\_N, N=27)

Fisher's OR: 1.32; Bonferroni p-val: 1

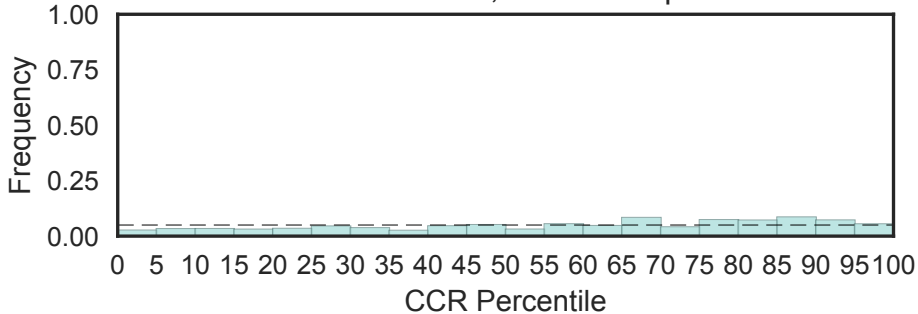

N-terminal or F0 domain of Talin-head FERM  
(FERM\_f0, N=5)

Fisher's OR: 5.92; Bonferroni p-val: 1

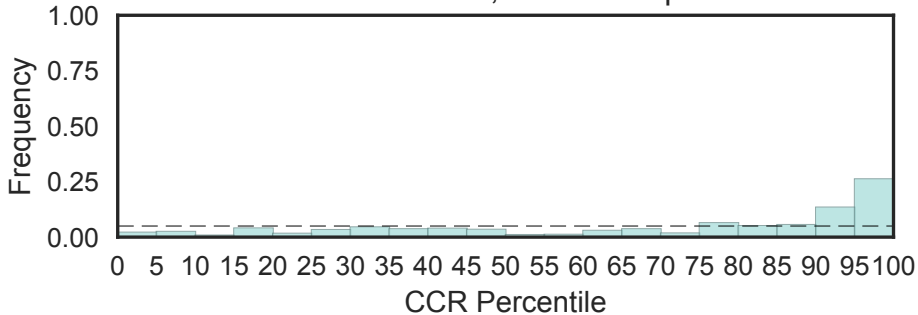

FEZ-like protein  
(FEZ, N=2)

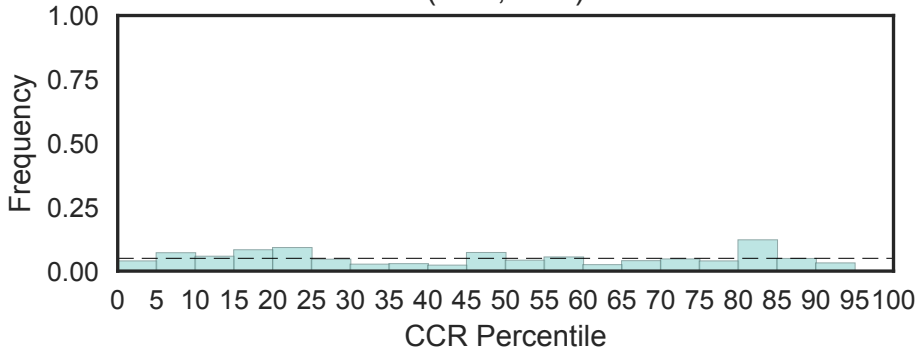

FF domain  
(FF, N=17)

Fisher's OR: 7.02; Bonferroni p-val: 0.0206

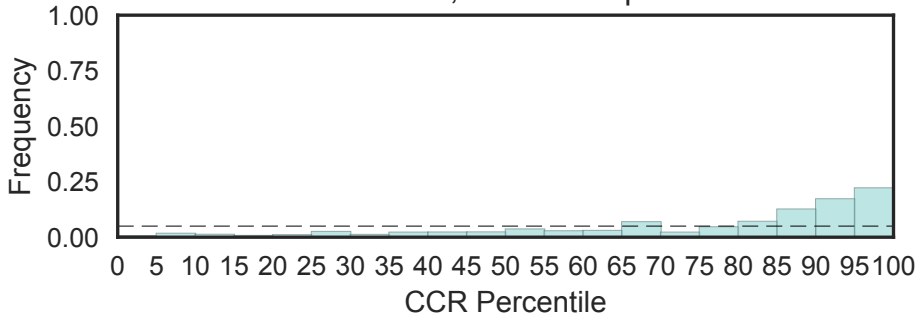

FG-GAP repeat  
(FG-GAP, N=37)

Fisher's OR: 0.442; Bonferroni p-val: 1

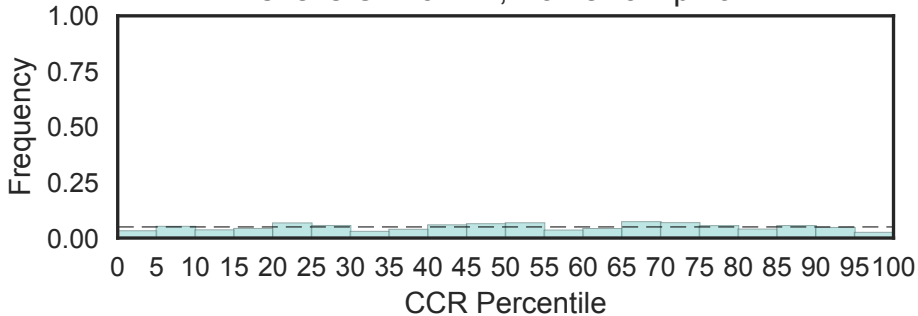



# Sulfatase-modifying factor enzyme 1 (FGE-sulfatase, N=2)

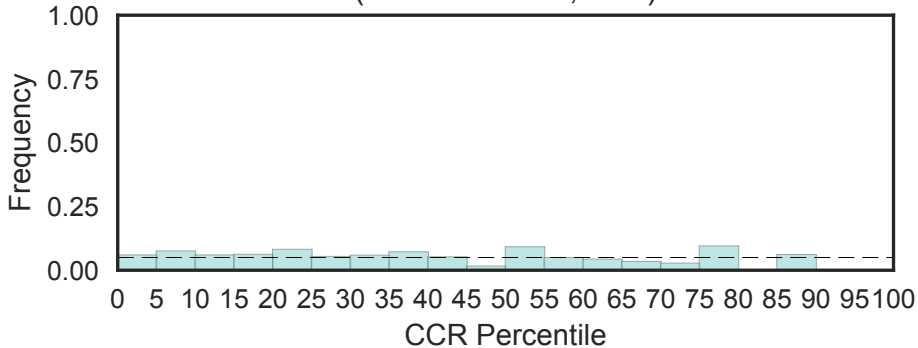

Fibroblast growth factor  
(FGF, N=21)

Fisher's OR: 1.05; Bonferroni p-val: 1

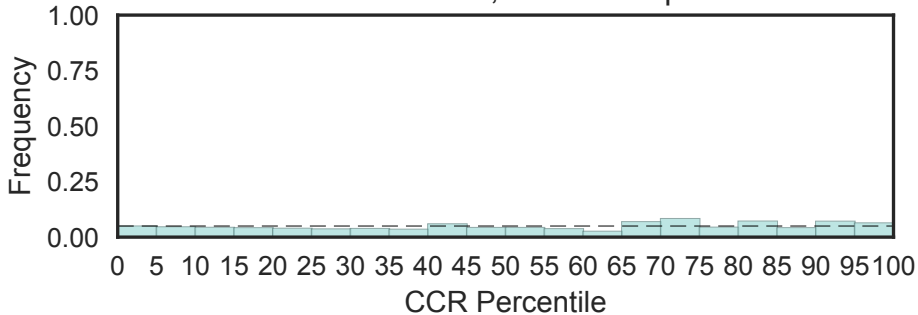

FGF binding protein 1 (FGF-BP1)  
(FGF-BP1, N=3)

Fisher's OR: 0; Bonferroni p-val: 1

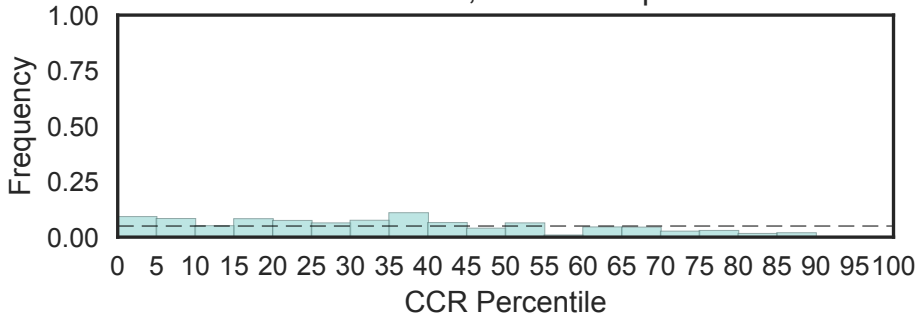

FGGY family of carbohydrate kinases, C-terminal domain  
(FGGY\_C, N=5)

Fisher's OR: 0; Bonferroni p-val: 1

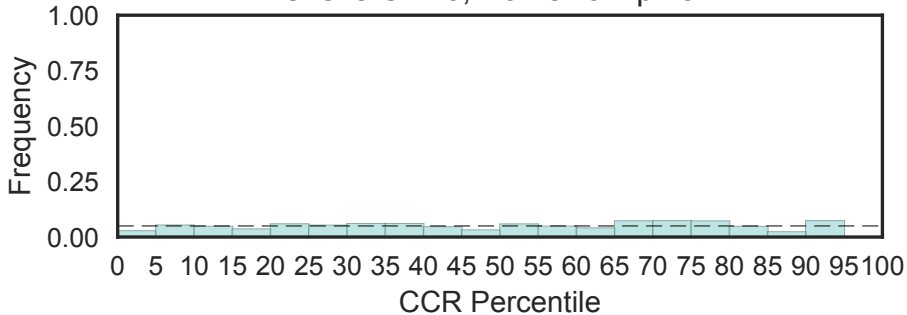

FGGY family of carbohydrate kinases, N-terminal domain  
(FGGY\_N, N=5)

Fisher's OR: 0.438; Bonferroni p-val: 1

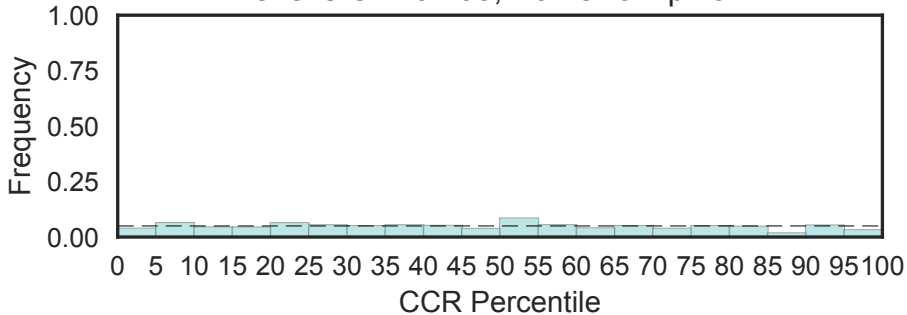

Formin Homology 2 Domain  
(FH2, N=14)

Fisher's OR: 0.624; Bonferroni p-val: 1

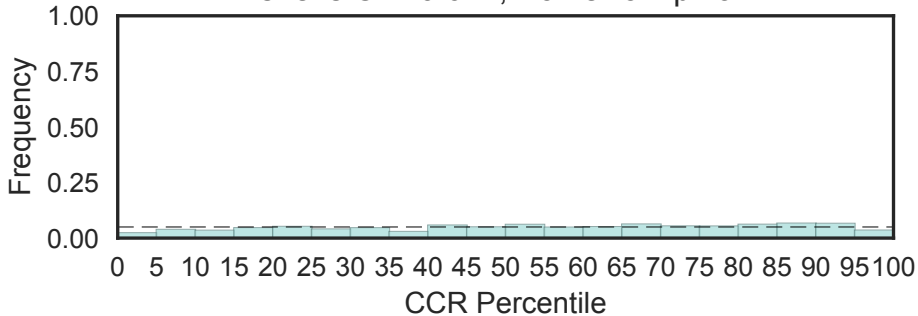

FHA domain  
(FHA, N=31)

Fisher's OR: 2.68; Bonferroni p-val: 1

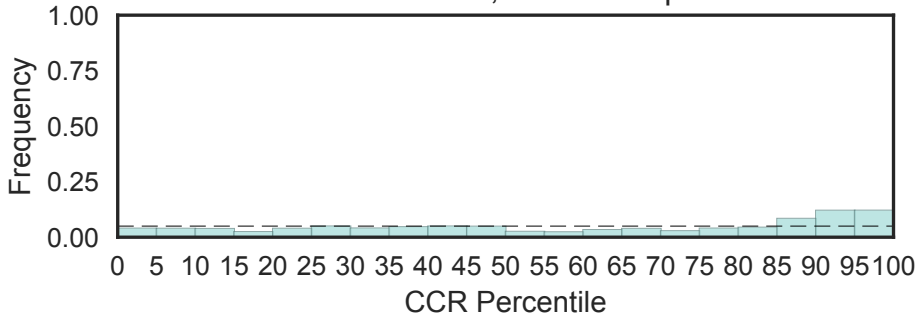

# Acidic fibroblast growth factor binding (FIBP) (FIBP, N=1)

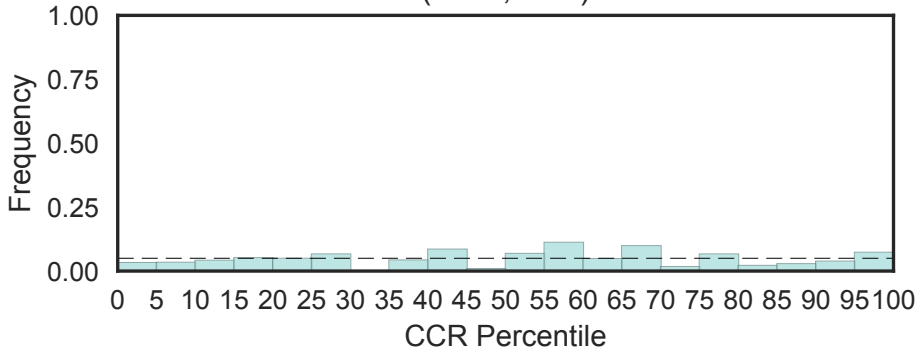



# Function to find (FIIND, N=2)

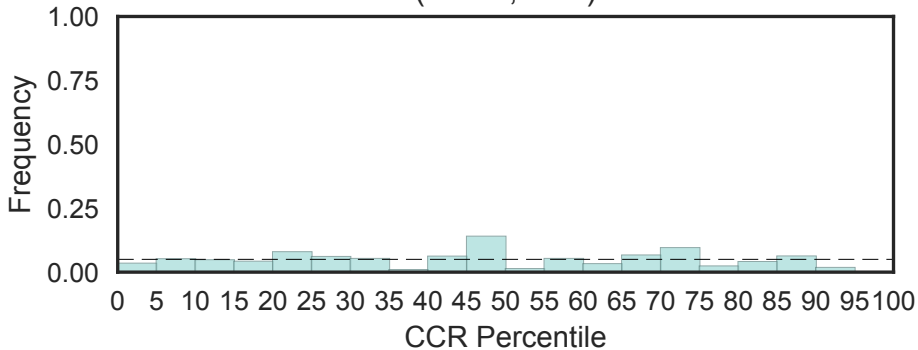

Fish-specific NACHT associated domain  
(FISNA, N=2)

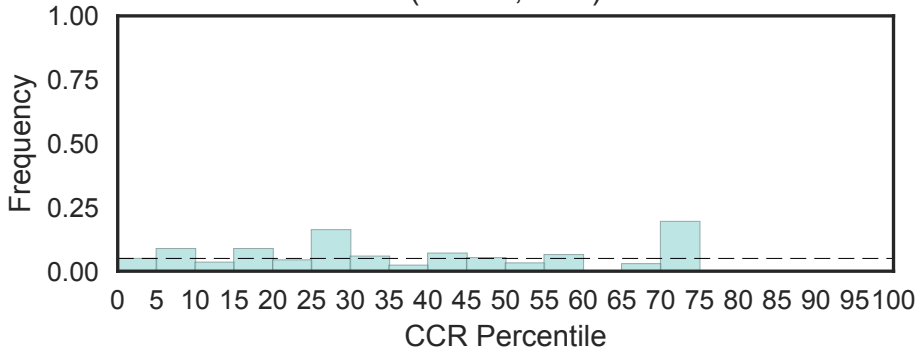

FIST C domain  
(FIST\_C, N=1)

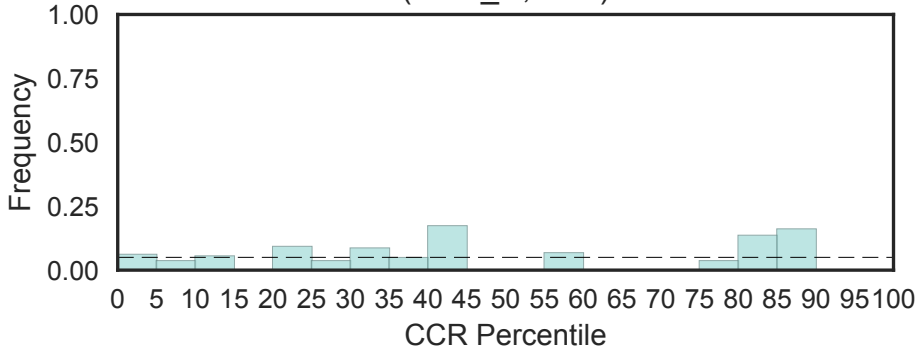

FKBP-type peptidyl-prolyl cis-trans isomerase  
(FKBP\_C, N=25)

Fisher's OR: 0.995; Bonferroni p-val: 1

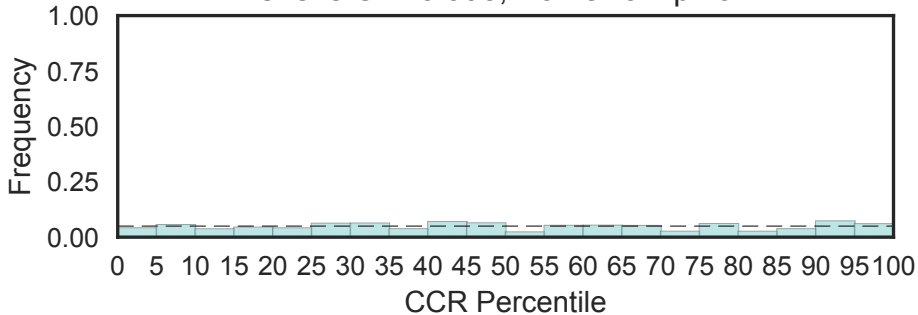

FLYWCH zinc finger domain  
(FLYWCH, N=5)

Fisher's OR: 0; Bonferroni p-val: 1

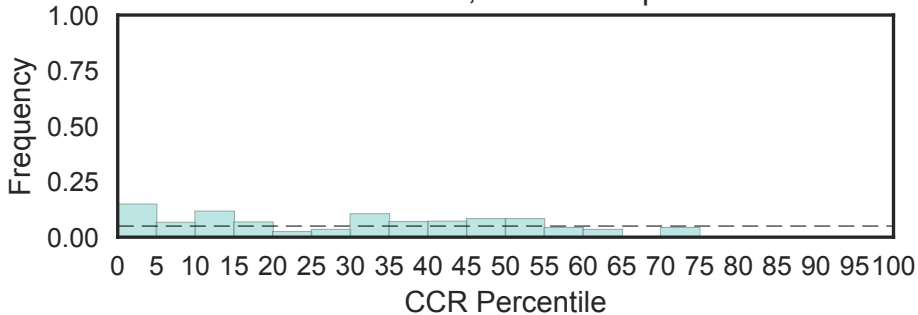

FLYWCH-type zinc finger-containing protein  
(FLYWCH\_N, N=2)

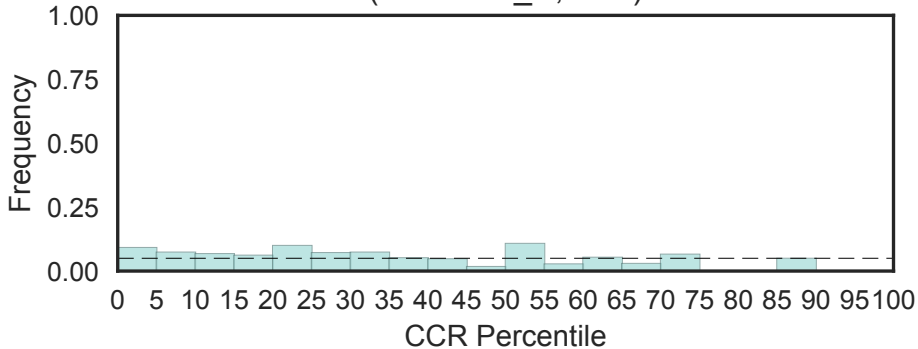

FLYWCH-type zinc finger-containing protein 1  
(FLYWCH\_u, N=6)

Fisher's OR: 0; Bonferroni p-val: 1

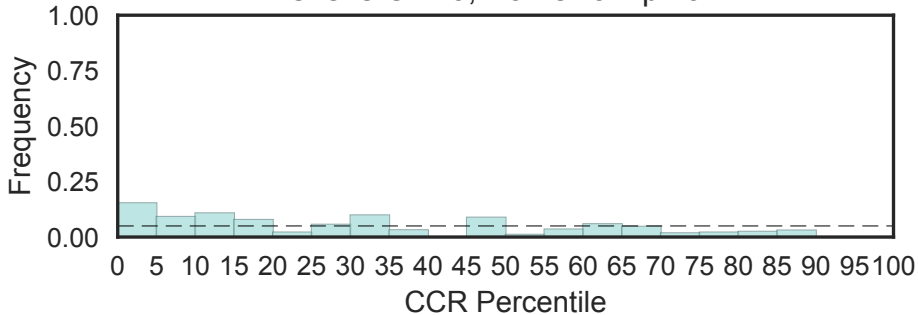

FMN-dependent dehydrogenase  
(FMN\_dh, N=4)

Fisher's OR: 0.536; Bonferroni p-val: 1

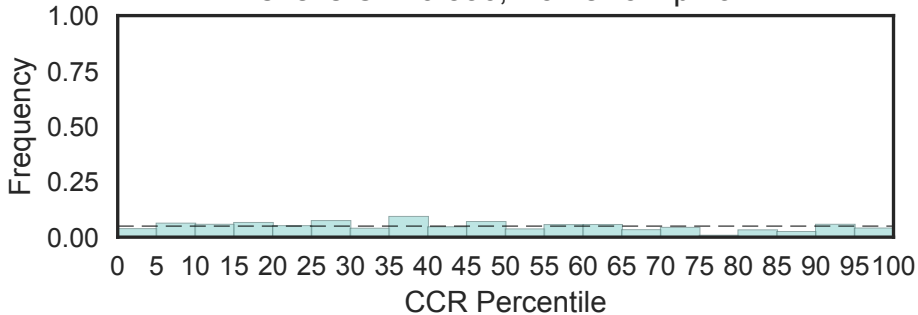



NADPH-dependent FMN reductase  
(FMN\_red, N=2)

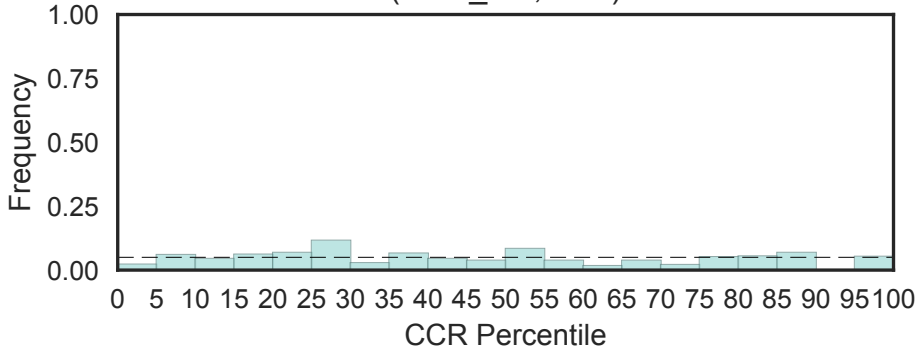

Flavin-binding monooxygenase-like  
(FMO-like, N=6)

Fisher's OR: 0.087; Bonferroni p-val: 1

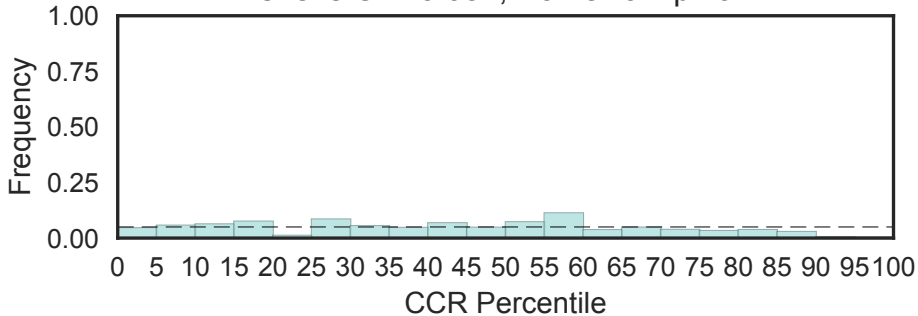

Folliculin-interacting protein C-terminus  
(FNIP\_C, N=3)

Fisher's OR: 1.98; Bonferroni p-val: 1

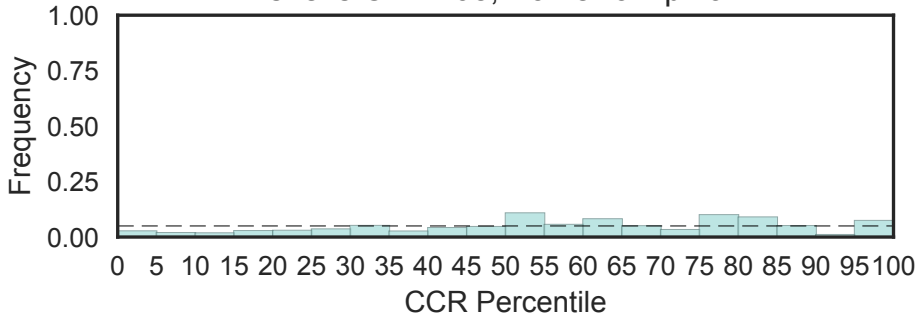

Folliculin-interacting protein middle domain  
(FNIP\_M, N=2)

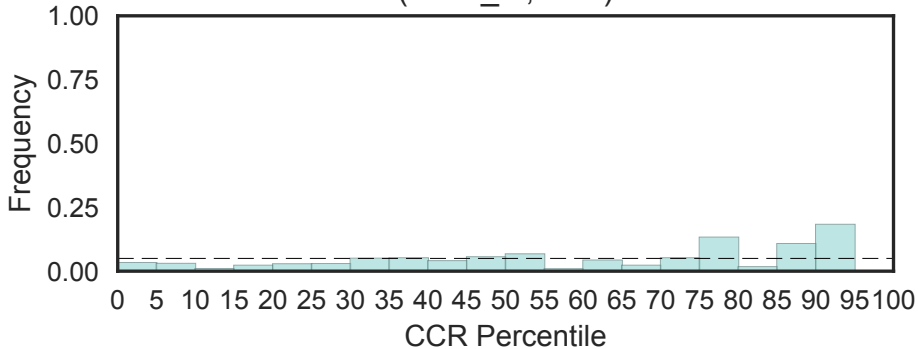

Folliculin-interacting protein N-terminus  
(FNIP\_N, N=3)

Fisher's OR: 0; Bonferroni p-val: 1

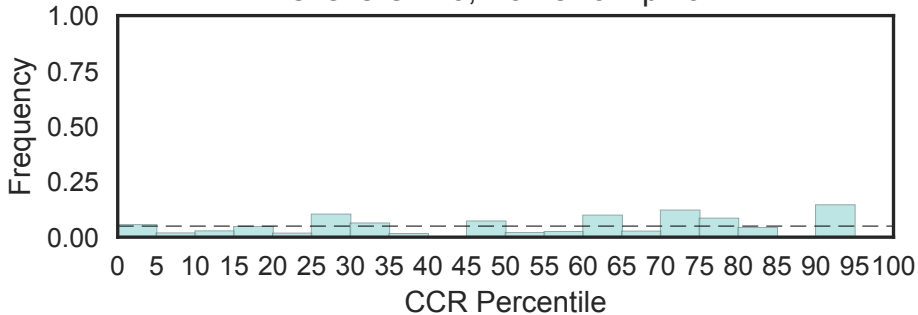

Follistatin/Osteonectin-like EGF domain  
(FOLN, N=5)

Fisher's OR: 0; Bonferroni p-val: 1

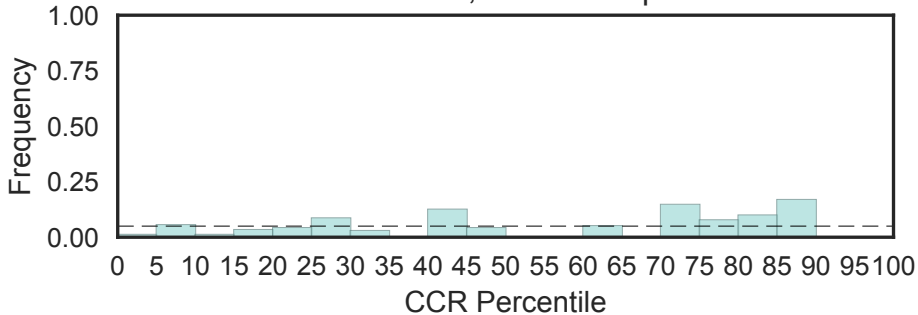

FOP N terminal dimerisation domain  
(FOP\_dimer, N=2)

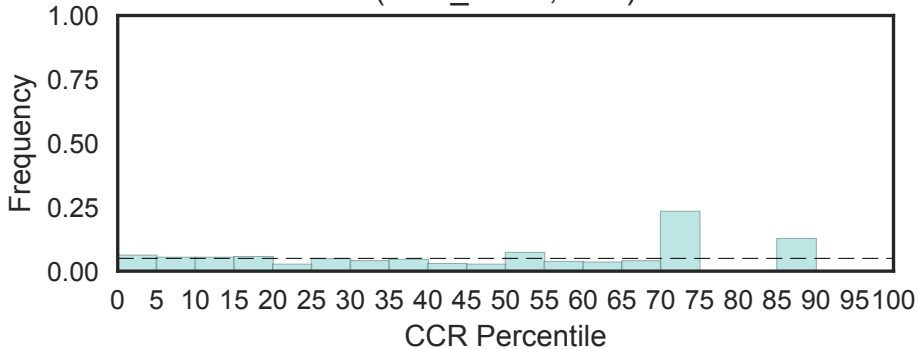

Transactivation domain of FOXO protein family  
(FOXO-TAD, N=2)

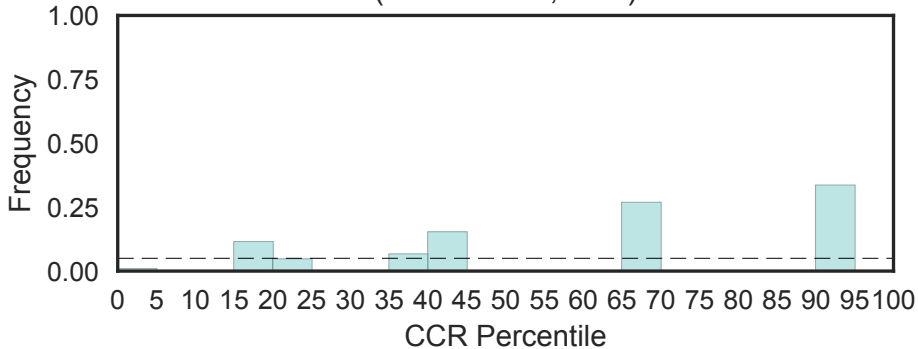



KIX-binding domain of forkhead box O, CR2  
(FOXO\_KIX\_bdg, N=2)

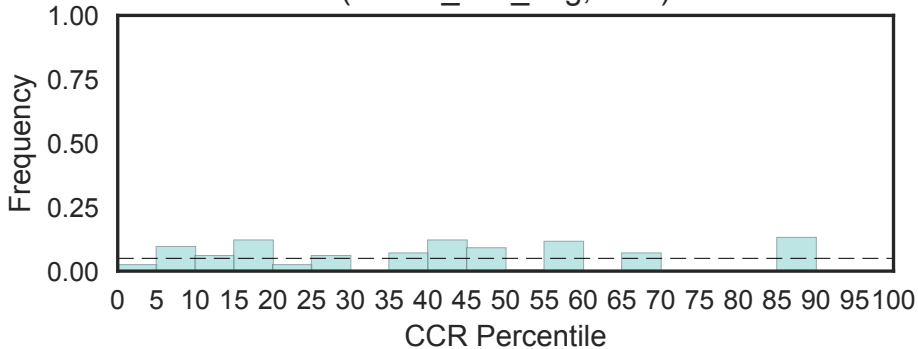

FOXP coiled-coil domain  
(FOXP-CC, N=3)

Fisher's OR: 17.4; Bonferroni p-val: 0.117

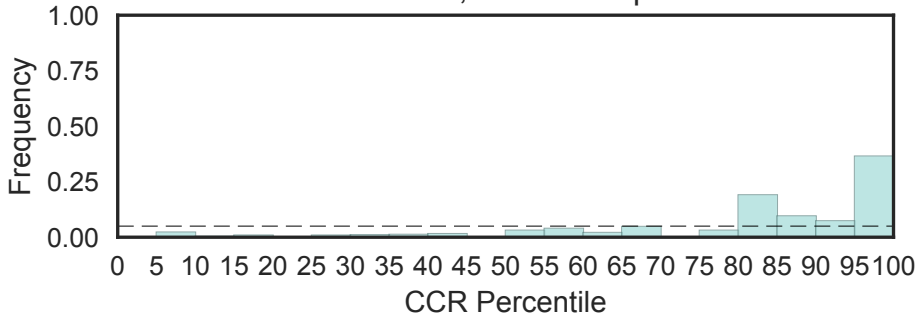

# Uncharacterised conserved protein (FPL, N=1)

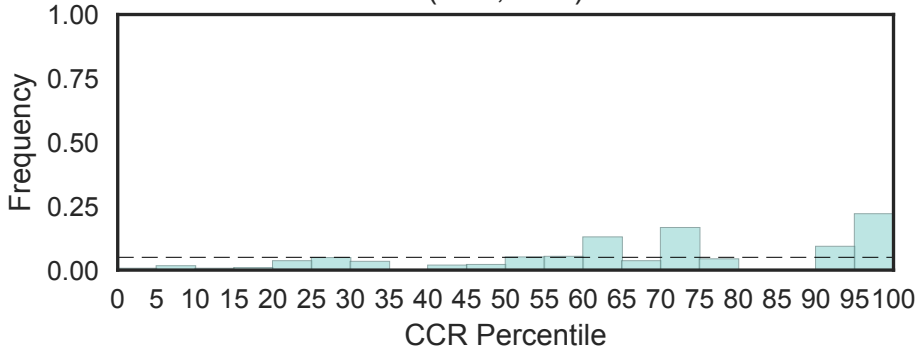

# Ferroportin1 (FPN1) (FPN1, N=1)

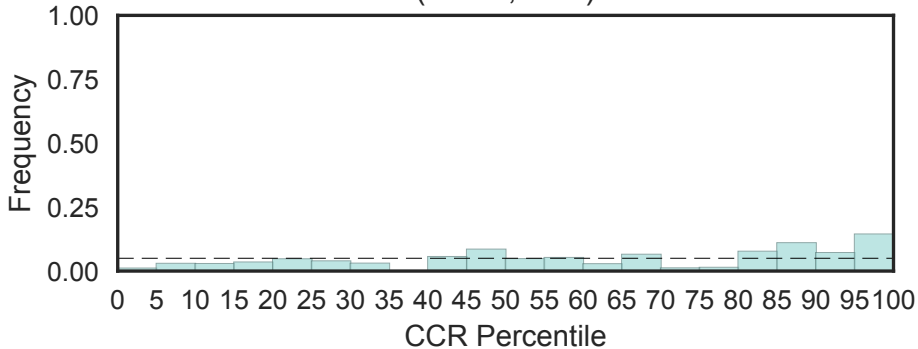

FR47-like protein  
(FR47, N=9)

Fisher's OR: 1.85; Bonferroni p-val: 1

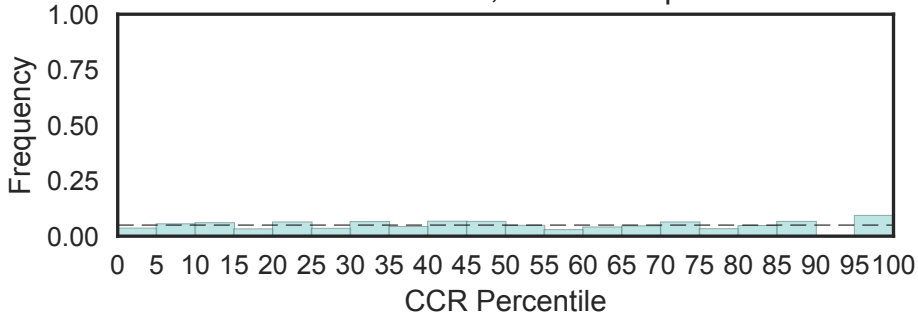

FKBP12-rapamycin binding domain  
(FRB\_dom, N=1)

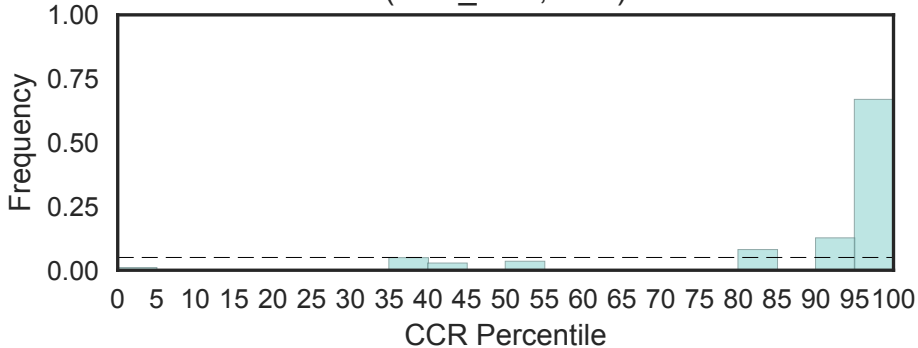

Fragile site-associated protein C-terminus  
(FSA\_C, N=2)

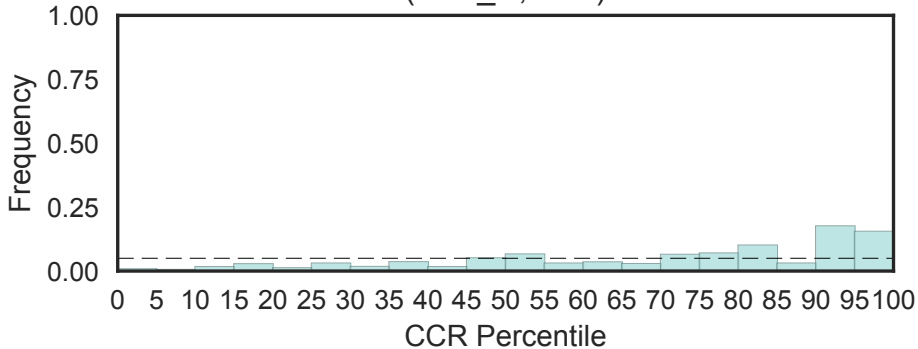

Serine hydrolase (FSH1)  
(FSH1, N=2)

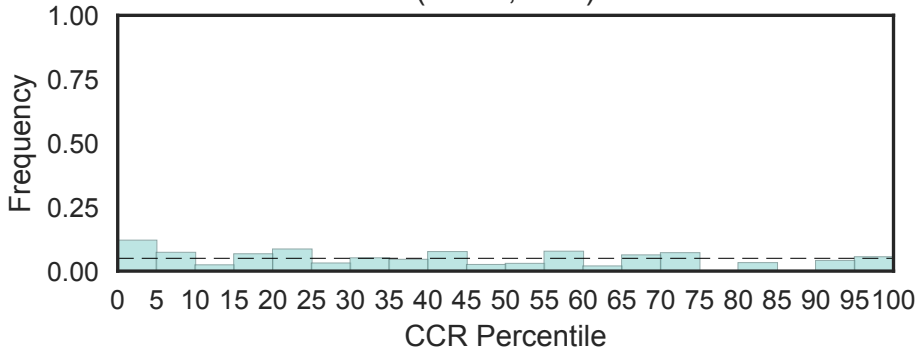



FSIP1 family  
(FSIP1, N=1)

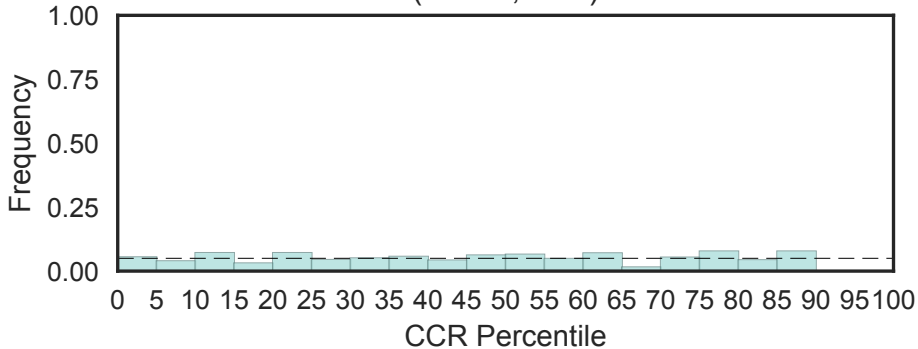

Fibrous sheath-interacting protein 2  
(FSIP2, N=4)

Fisher's OR: 0; Bonferroni p-val: 1

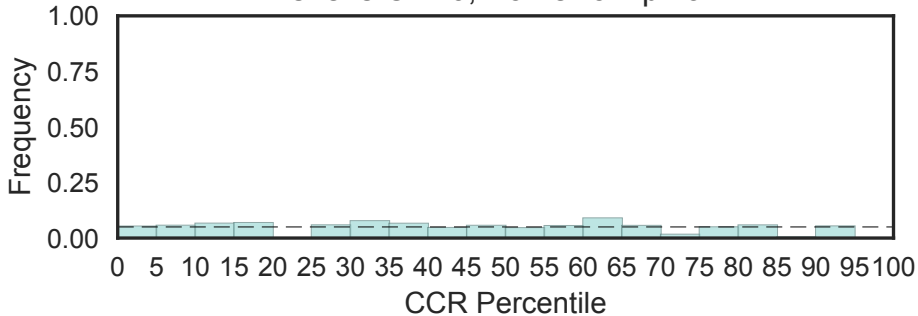

Formiminotransferase domain  
(FTCD, N=1)

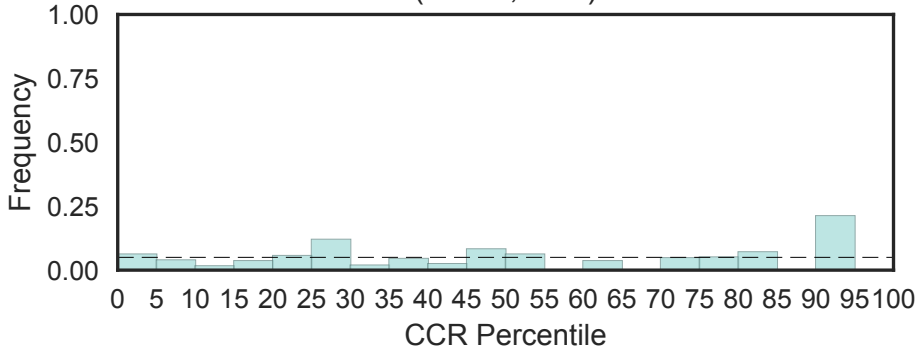

Formiminotransferase-cyclodeaminase  
(FTCD\_C, N=1)

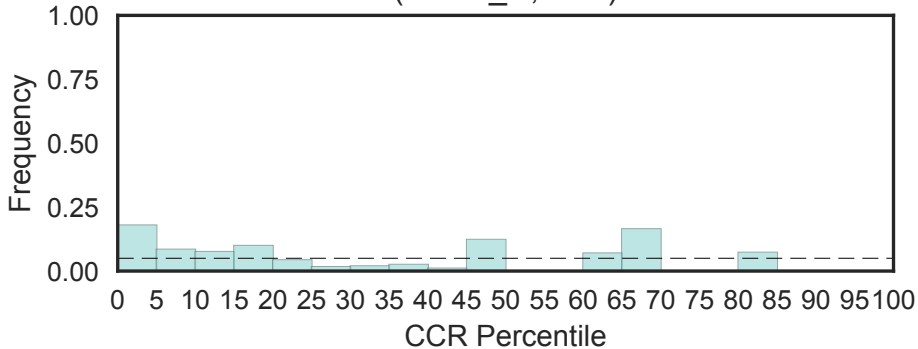

Formiminotransferase domain, N-terminal subdomain  
(FTCD\_N, N=2)

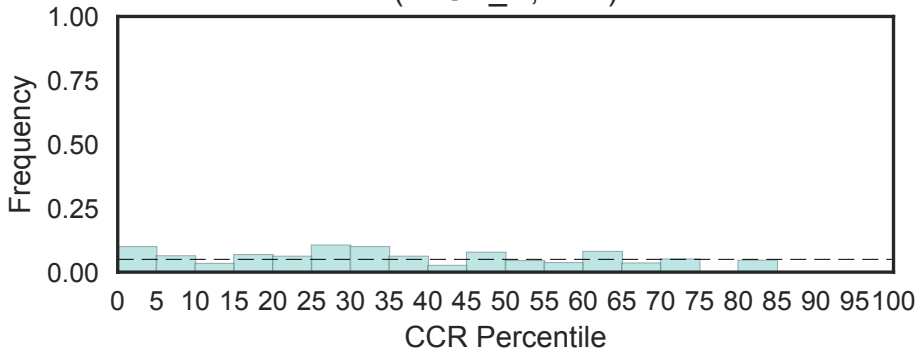

Formate--tetrahydrofolate ligase  
(FTHFS, N=3)  
Fisher's OR: 0.464; Bonferroni p-val: 1

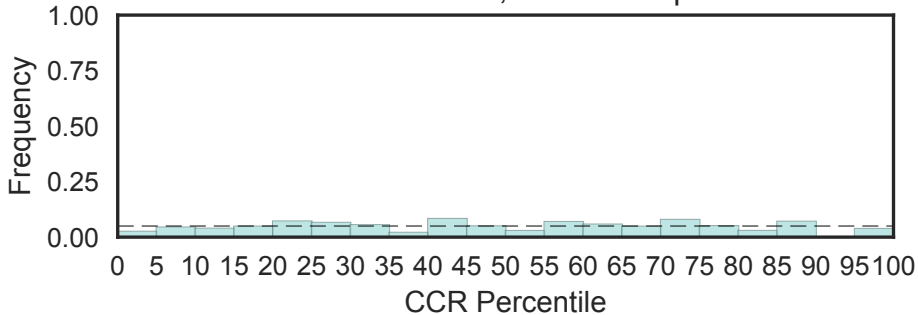

FTO C-terminal domain  
(FTO\_CTD, N=1)

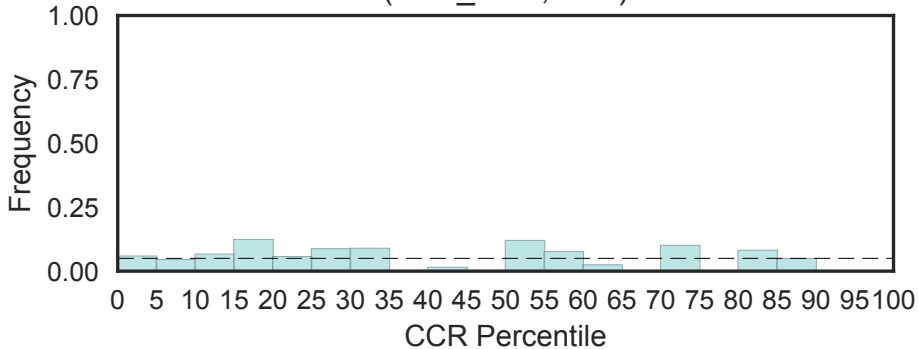

FTO catalytic domain  
(FTO\_NTD, N=1)

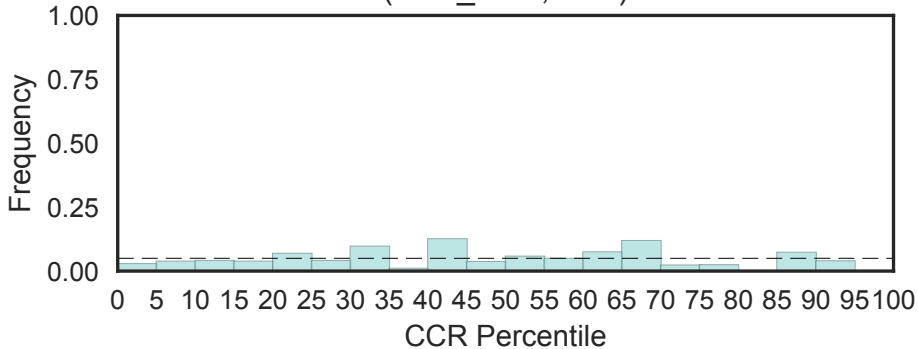



Protein of unknown function  
(FWWh, N=2)

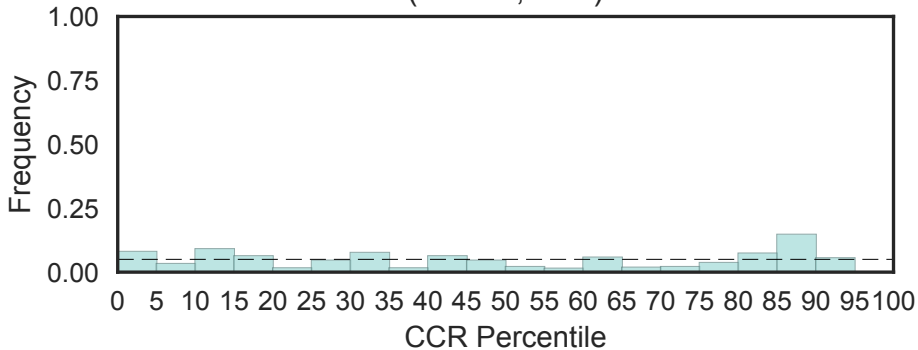

Fragile X-related 1 protein core C terminal  
(FXMRP1\_C\_core, N=2)

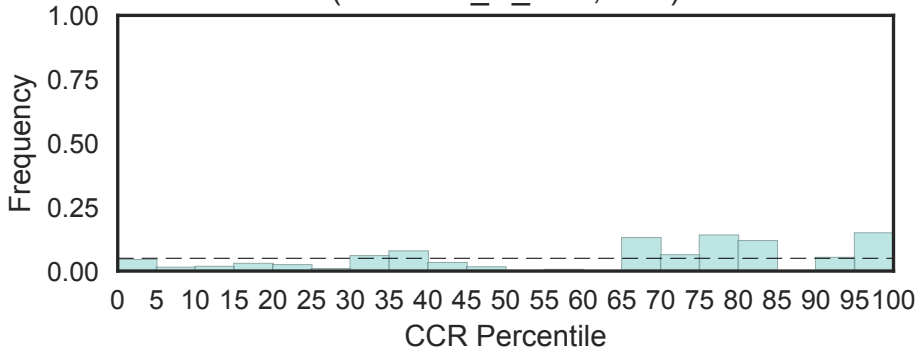

Fragile X-related 1 protein C-terminal region 2  
(FXR\_C1, N=2)

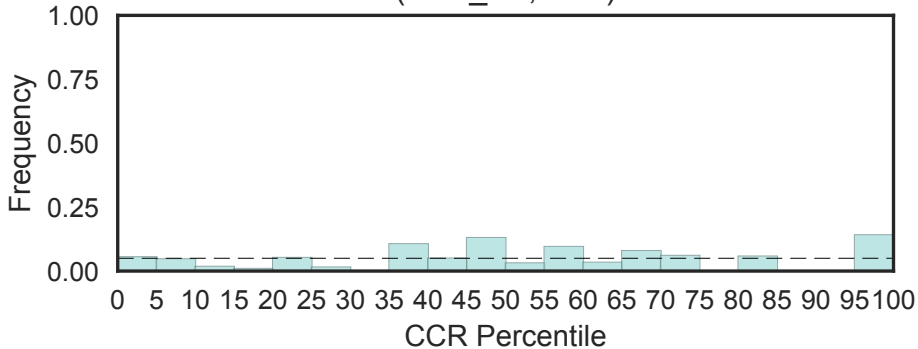

Fragile X-related 1 protein C-terminal region 3  
(FXR\_C3, N=1)

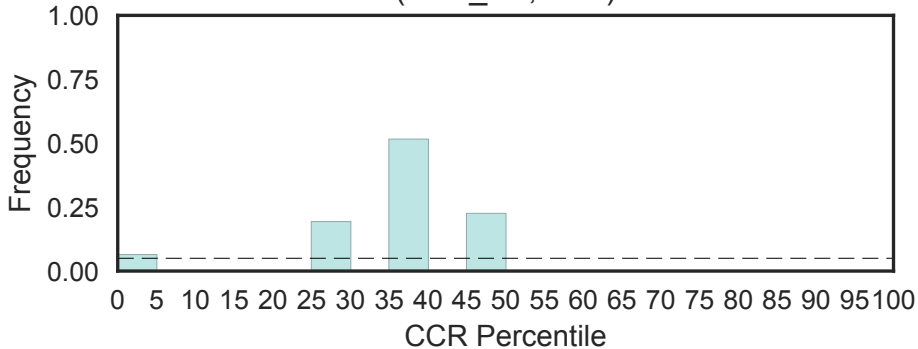

Coagulation Factor Xa inhibitory site  
(FXa\_inhibition, N=71)  
Fisher's OR: 0.113; Bonferroni p-val: 1

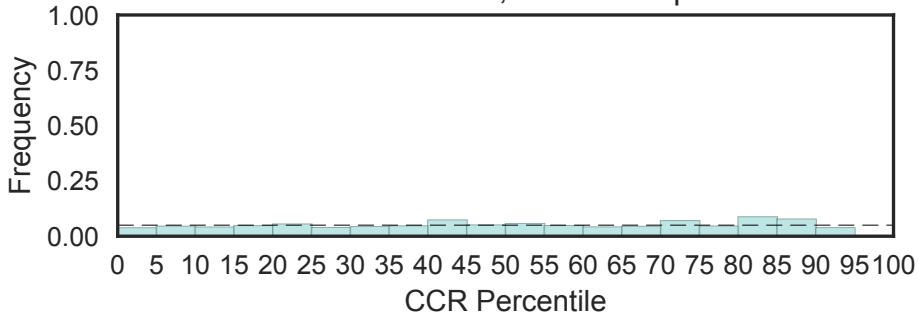

F/Y rich C-terminus  
(FYRC, N=5)

Fisher's OR: 4.08; Bonferroni p-val: 1

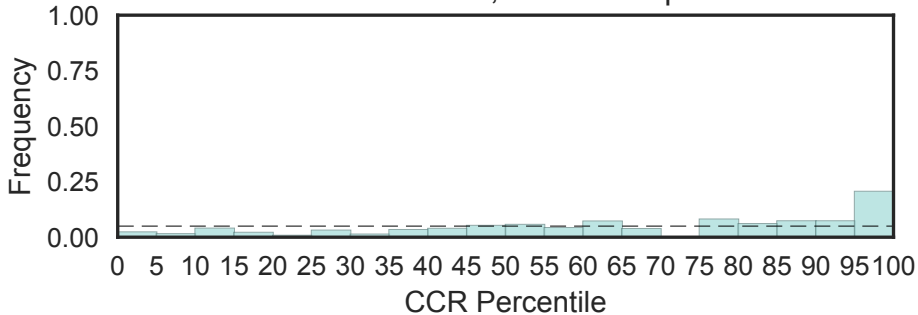

F/Y-rich N-terminus  
(FYRN, N=5)

Fisher's OR: 3.77; Bonferroni p-val: 1

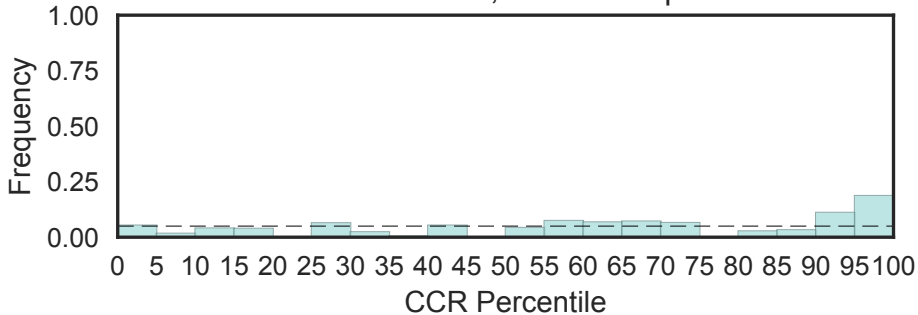

Forty-two-three protein  
(FYTT, N=1)

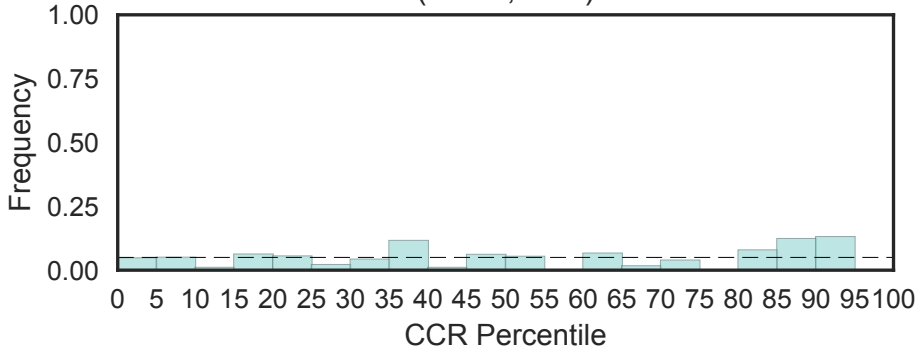



FYVE zinc finger  
(FYVE, N=29)

Fisher's OR: 1.53; Bonferroni p-val: 1

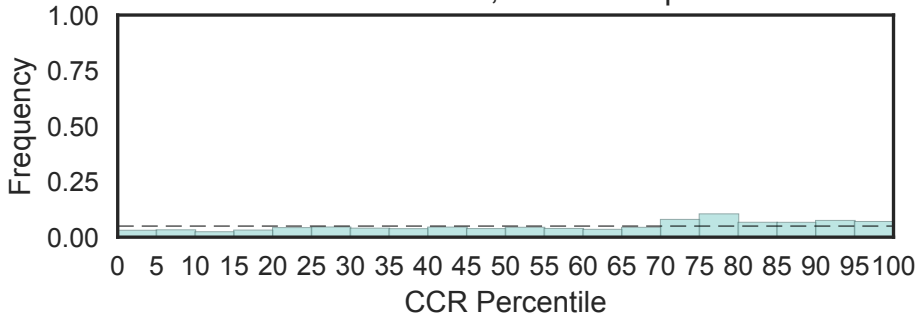

FYVE-type zinc finger  
(FYVE\_2, N=10)

Fisher's OR: 0.259; Bonferroni p-val: 1

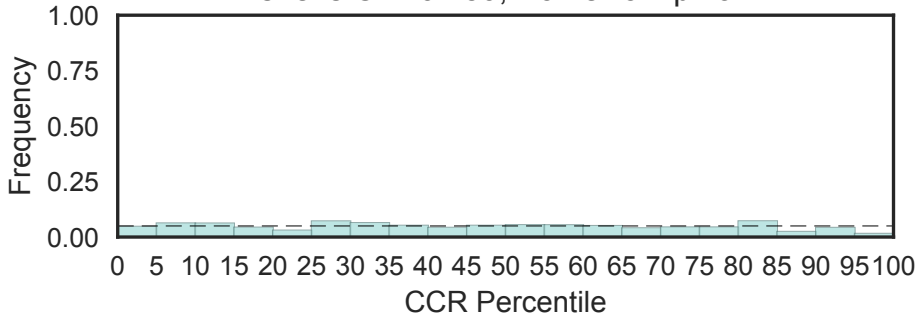

F-actin binding  
(F\_actin\_bind, N=2)

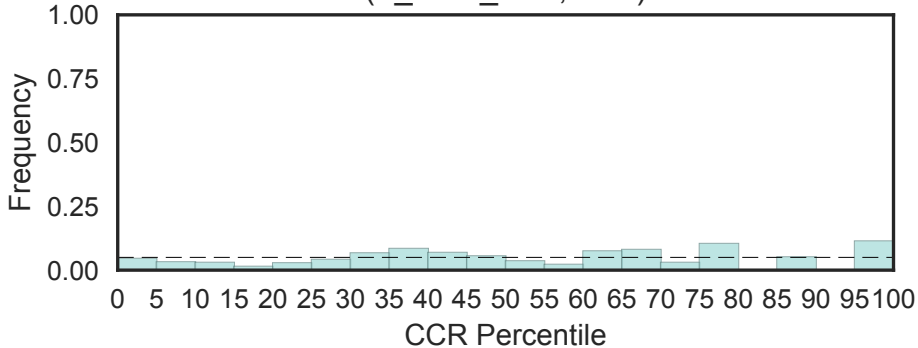

F-actin capping protein, beta subunit  
(F\_actin\_cap\_B, N=1)

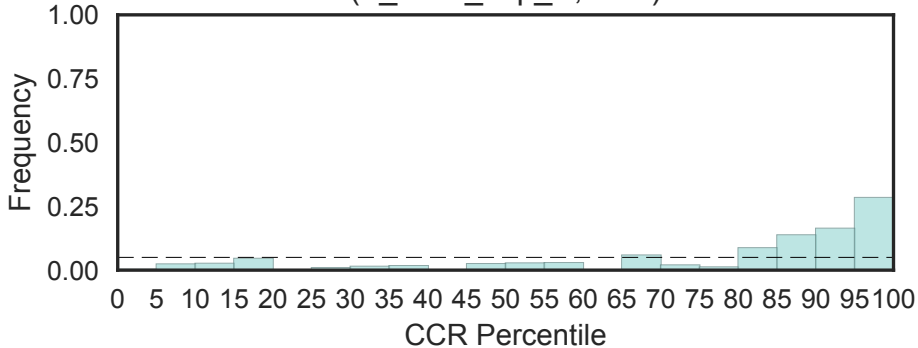

Golgi casein kinase, C-terminal, Fam20  
(Fam20C, N=3)

Fisher's OR: 0; Bonferroni p-val: 1

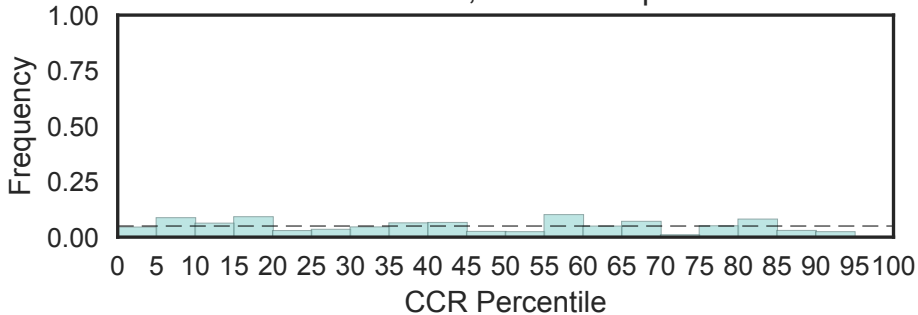

Fanconi anaemia protein FancD2 nuclease  
(FancD2, N=1)

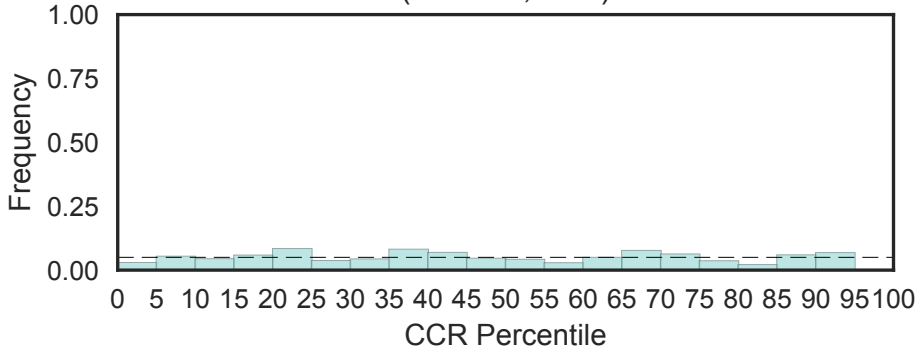

Fanconi anaemia group A protein  
(Fanconi\_A, N=1)

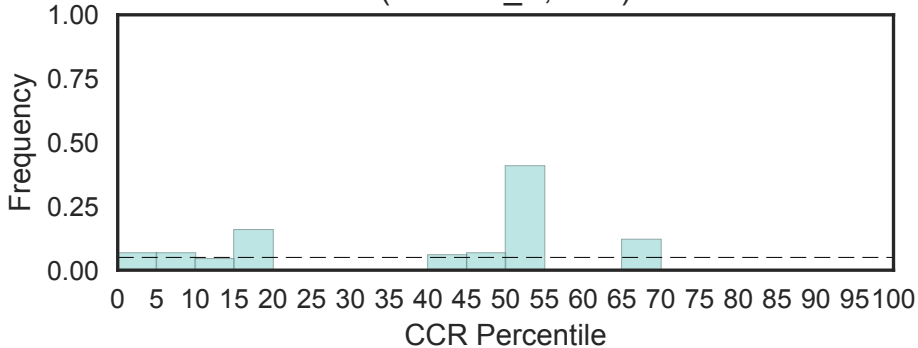

Fanconi anaemia group A protein N terminus  
(Fanconi\_A\_N, N=1)

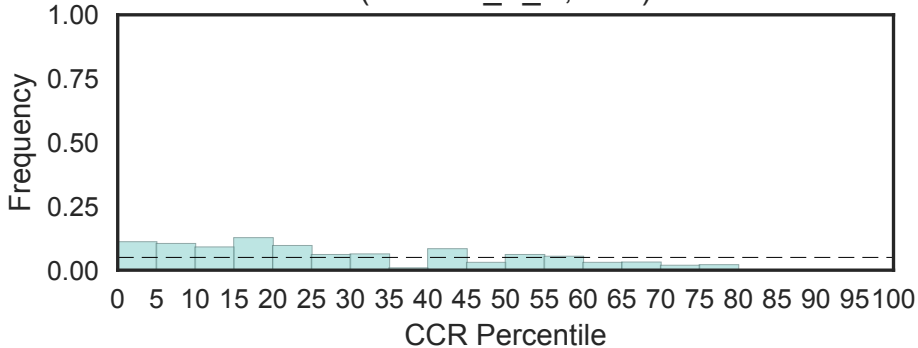



Fanconi anaemia group C protein  
(Fanconi\_C, N=1)

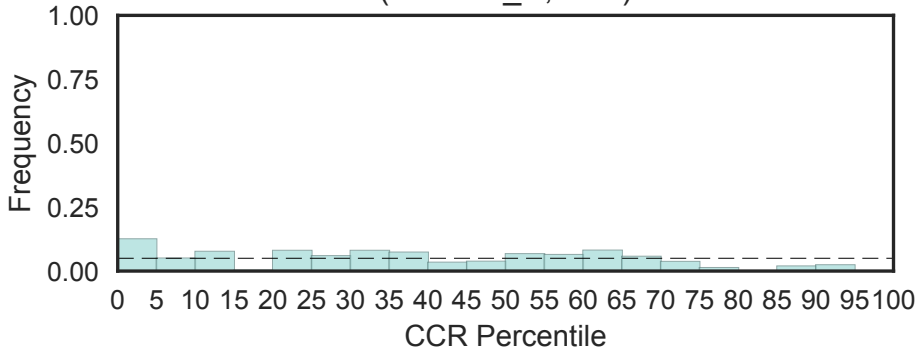

Formamidopyrimidine-DNA glycosylase N-terminal domain  
(Fapy\_DNA\_glyco, N=1)

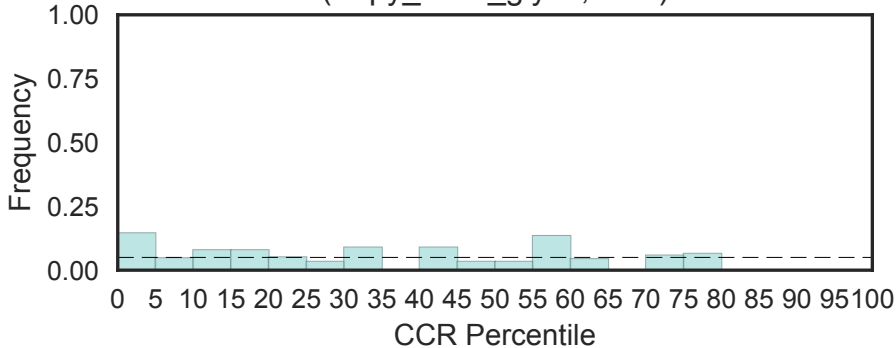

FAR-17a/AIG1-like protein  
(Far-17a\_AIG1, N=2)

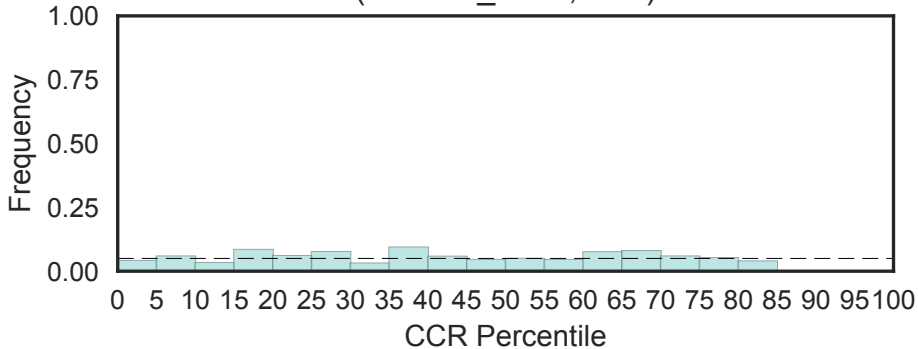

Fasciclin domain  
(Fasciclin, N=21)

Fisher's OR: 0.106; Bonferroni p-val: 1

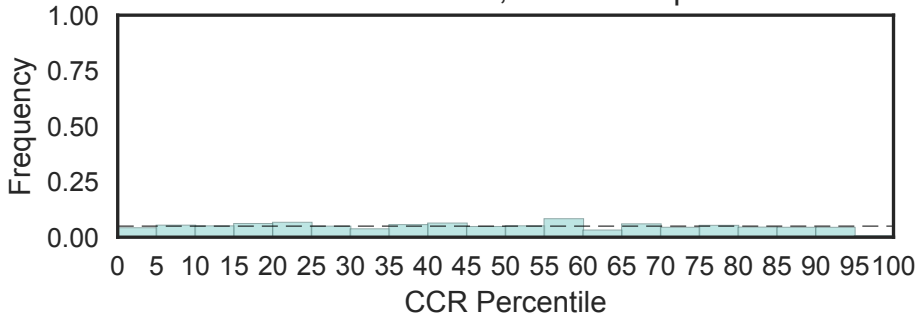

Fascin domain  
(Fascin, N=11)

Fisher's OR: 0; Bonferroni p-val: 1

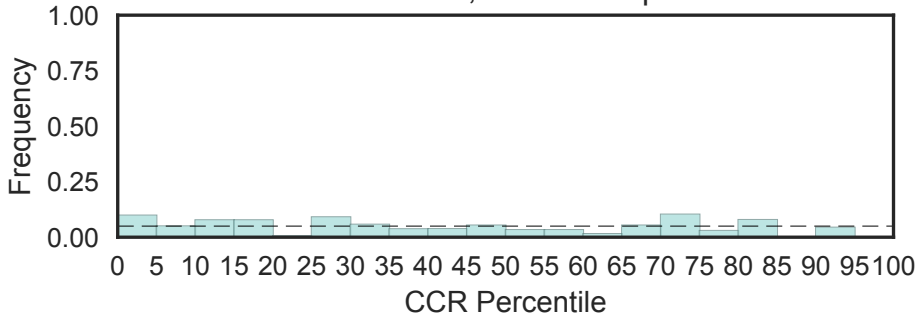

Fibronectin-binding protein A N-terminus (FbpA)  
(FbpA, N=2)

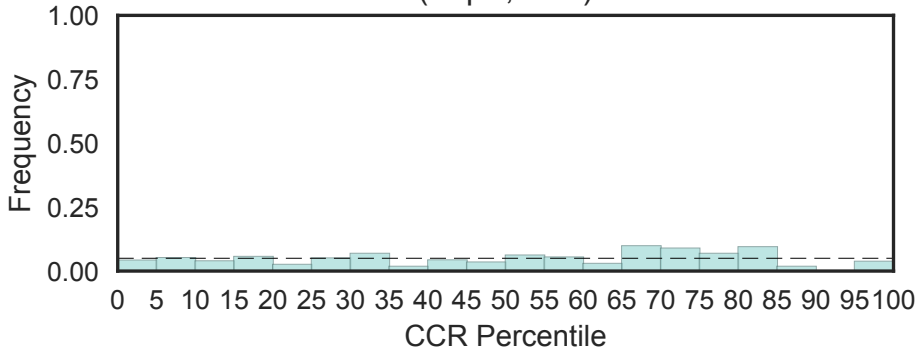

Fcf1  
(Fcf1, N=2)

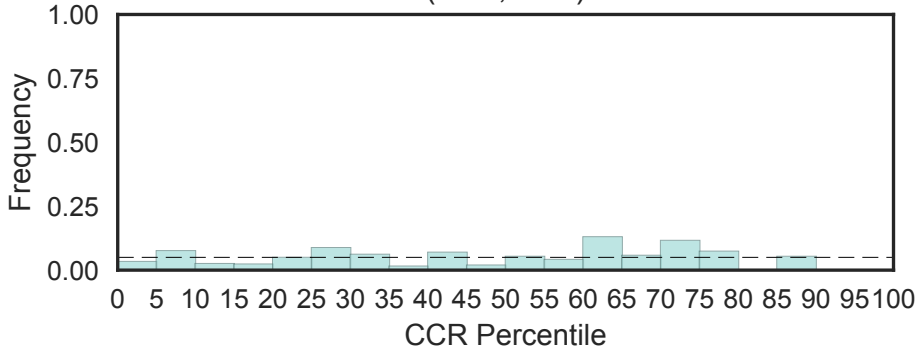

# Fcf2 pre-rRNA processing (Fcf2, N=1)

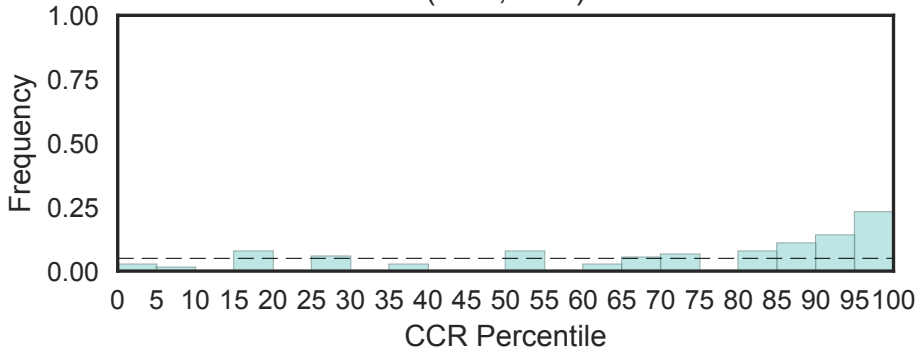



Iron-containing alcohol dehydrogenase  
(Fe-ADH, N=1)

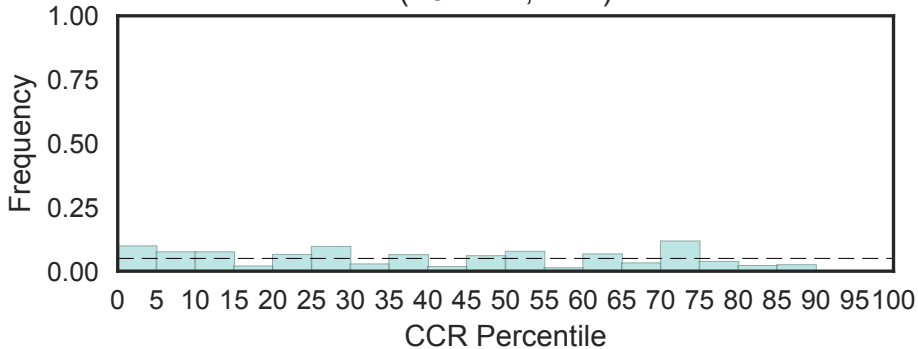

Iron-containing alcohol dehydrogenase  
(Fe-ADH\_2, N=1)

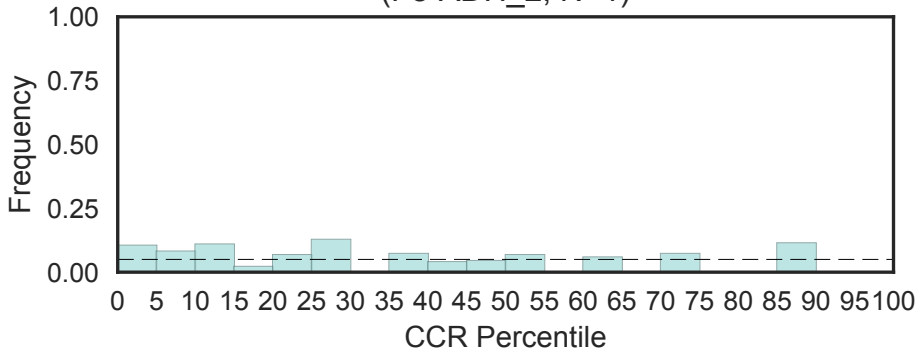

Iron-sulphur cluster biosynthesis  
(Fe-S\_biosyn, N=3)

Fisher's OR: 0; Bonferroni p-val: 1

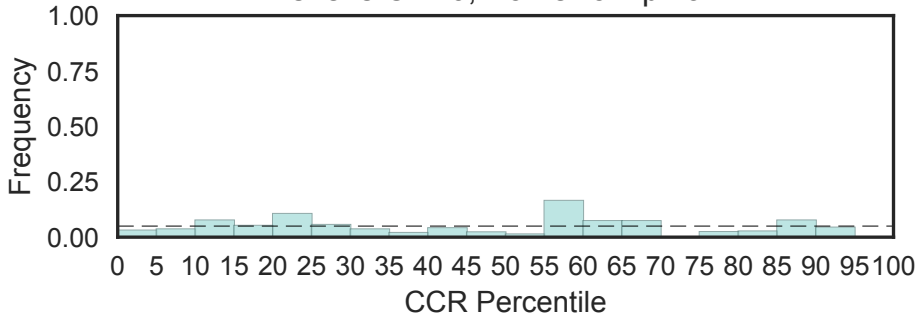

Iron-sulfur cluster assembly protein  
(FeS\_assembly\_P, N=2)

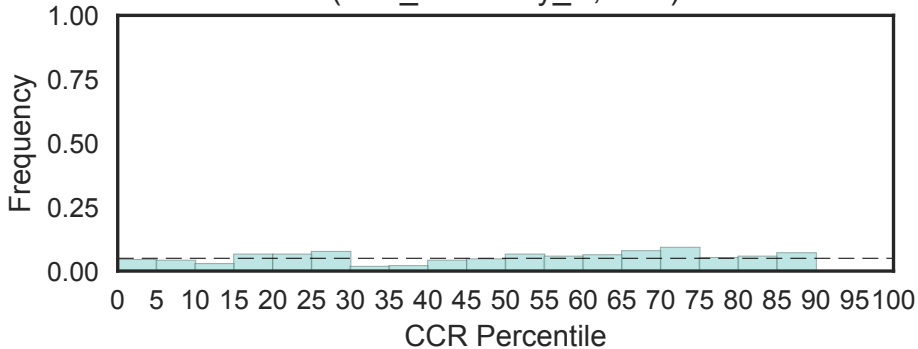

Iron hydrogenase small subunit  
(Fe\_hyd\_SSU, N=2)

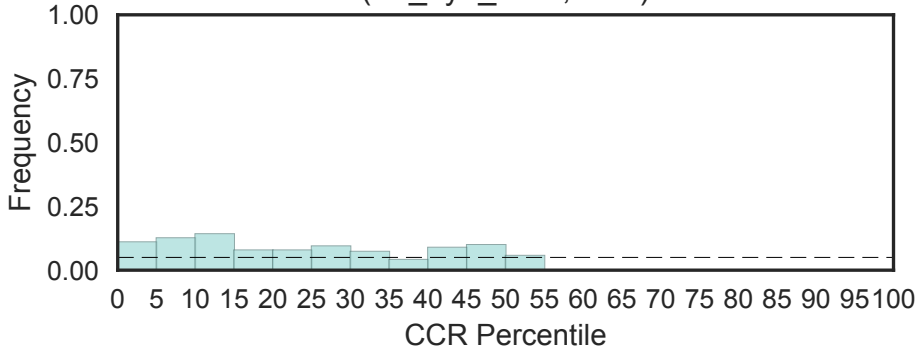

Iron only hydrogenase large subunit, C-terminal domain  
(Fe\_hyd\_lg\_C, N=2)

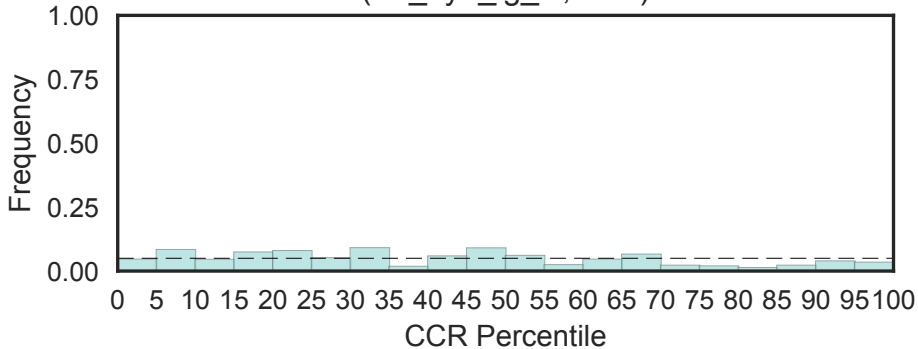

Ferrous iron transport protein B  
(FeoB\_N, N=12)

Fisher's OR: 0.25; Bonferroni p-val: 1

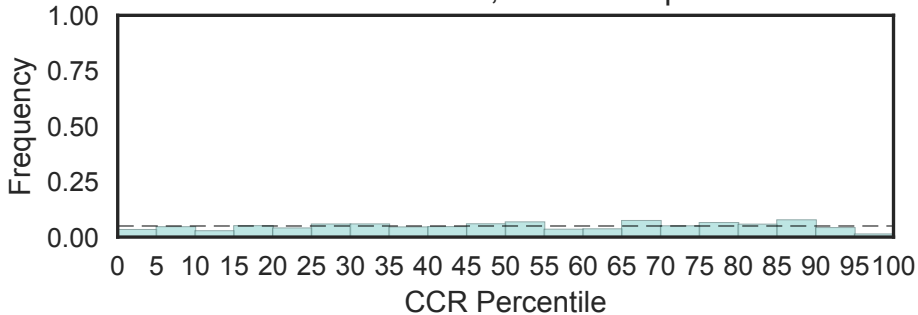

2Fe-2S iron-sulfur cluster binding domain  
(Fer2, N=6)

Fisher's OR: 0.625; Bonferroni p-val: 1

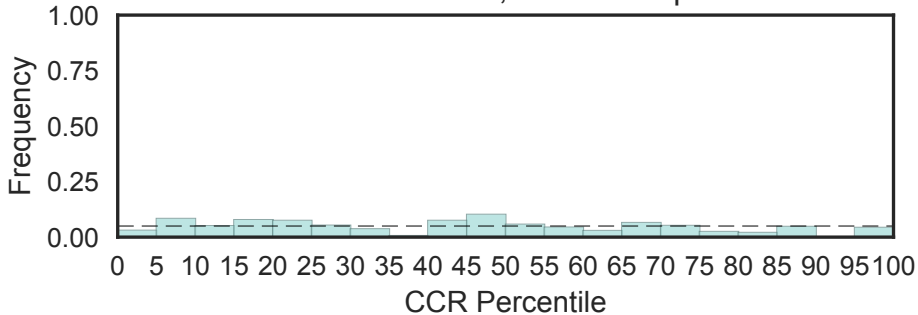



[2Fe-2S] binding domain  
(Fer2\_2, N=2)

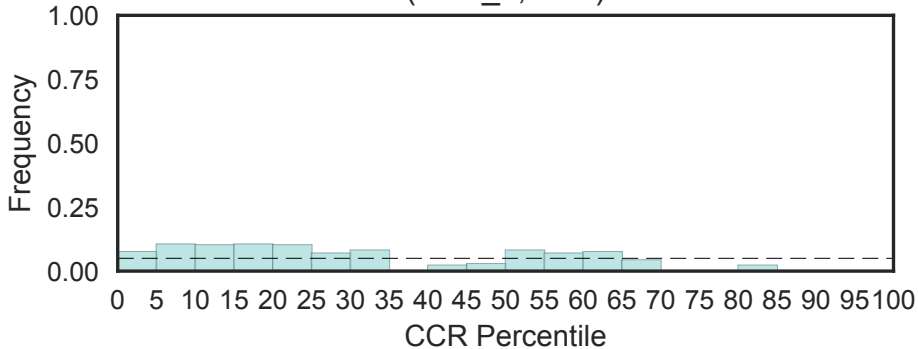

2Fe-2S iron-sulfur cluster binding domain  
(Fer2\_3, N=1)

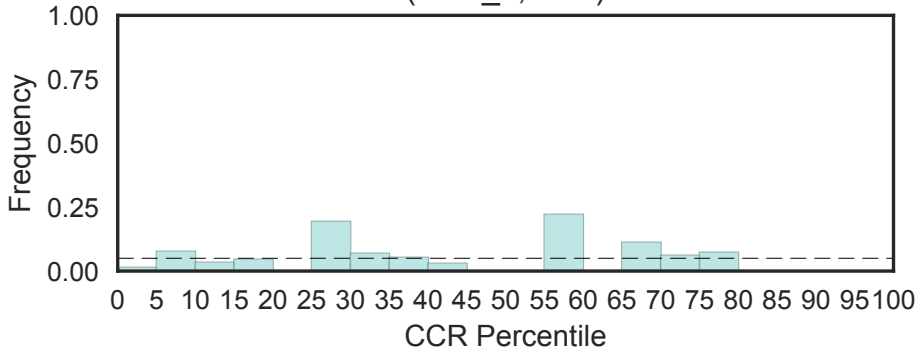

2Fe-2S iron-sulfur cluster binding domain  
(Fer2\_4, N=1)

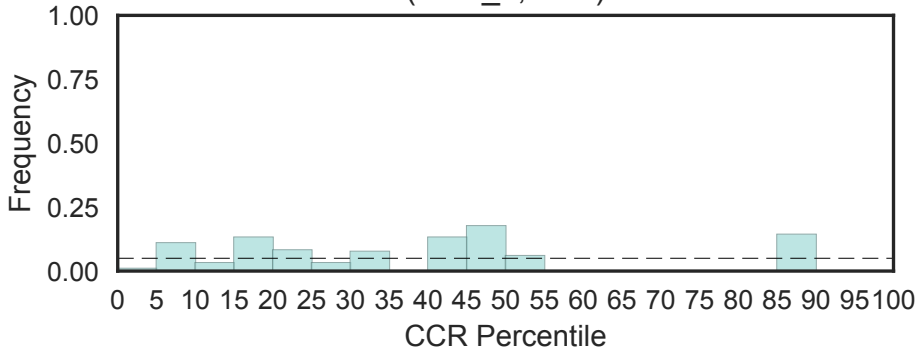

4Fe-4S binding domain  
(Fer4, N=3)

Fisher's OR: 6.01; Bonferroni p-val: 1

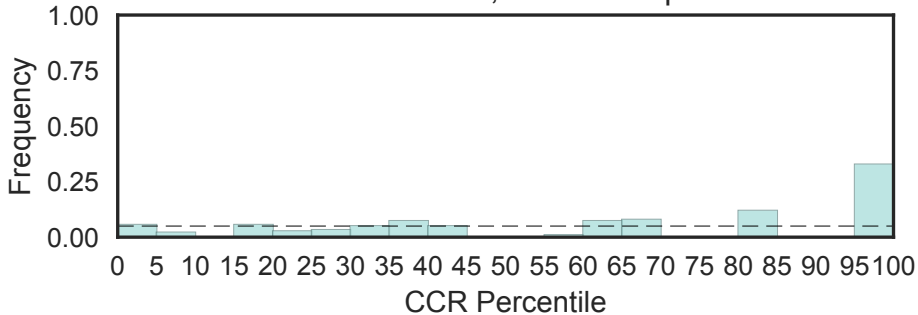

4Fe-4S dicluster domain  
(Fer4\_10, N=2)

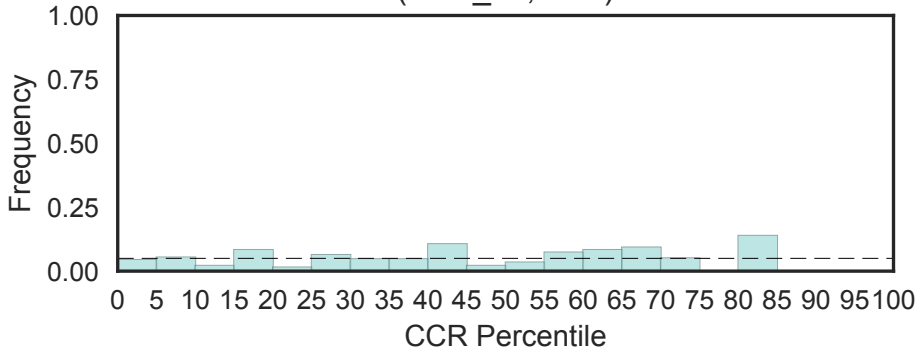

4Fe-4S single cluster domain  
(Fer4\_12, N=2)

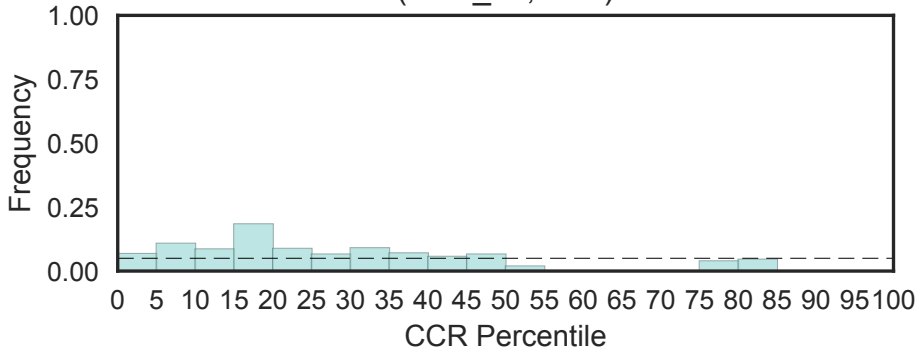

4Fe-4S single cluster domain  
(Fer4\_14, N=1)

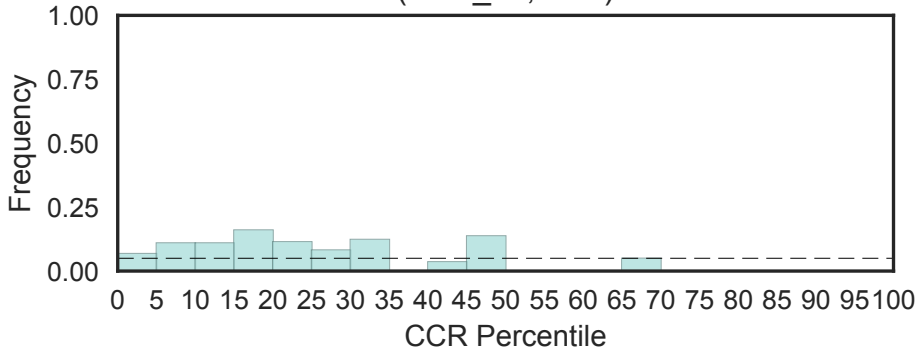

4Fe-4S dicluster domain  
(Fer4\_17, N=1)

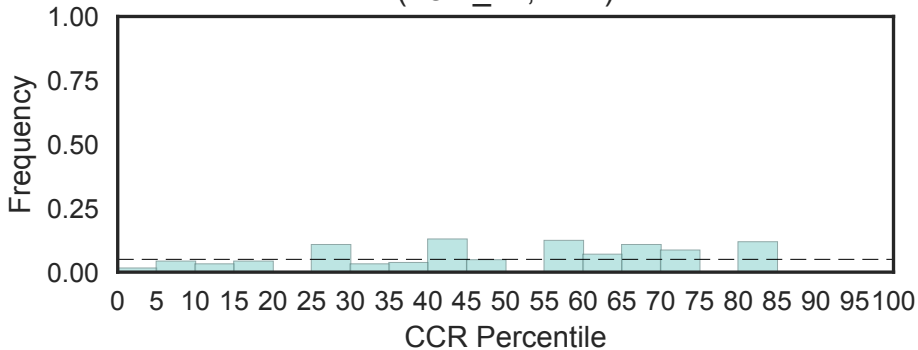



Dihydropyrimidine dehydrogenase domain II, 4Fe-4S cluster  
(Fer4\_20, N=1)

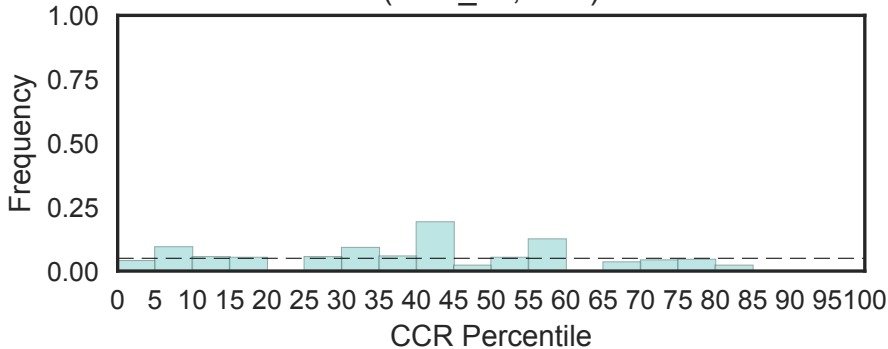

4Fe-4S dicluster domain  
(Fer4\_21, N=1)

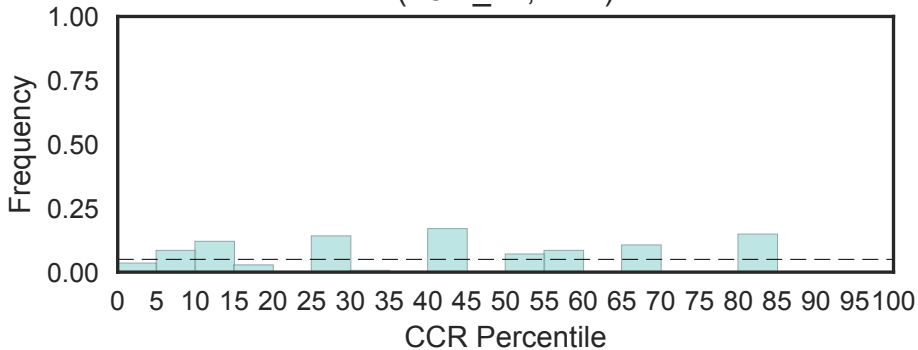

# 4Fe-4S binding domain

(Fer4\_4, N=3)

Fisher's OR: 9.83; Bonferroni p-val: 1

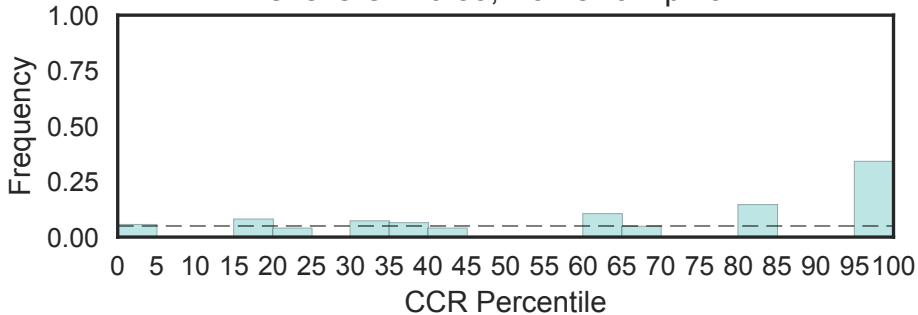

4Fe-4S binding domain  
(Fer4\_5, N=1)

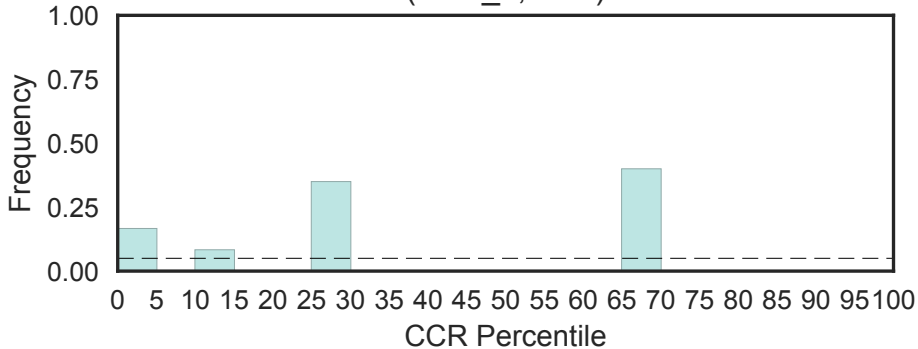

4Fe-4S dicluster domain  
(Fer4\_7, N=1)

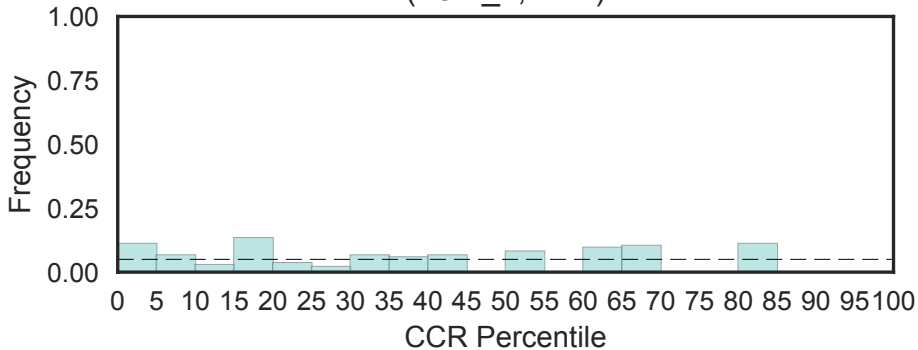

4Fe-4S dicluster domain  
(Fer4\_8, N=1)

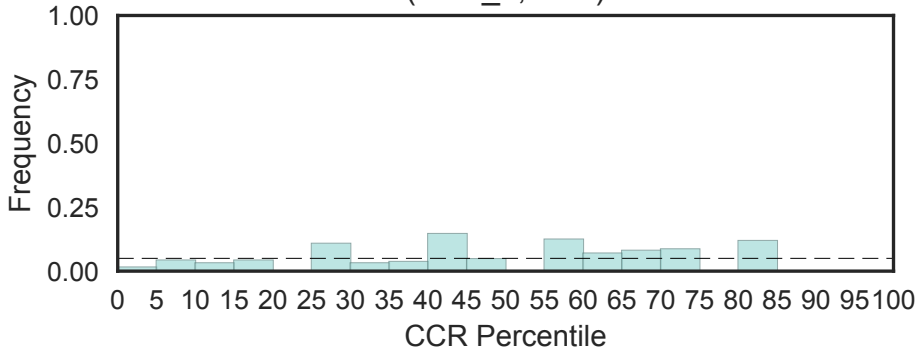

4Fe-4S dicluster domain  
(Fer4\_9, N=1)

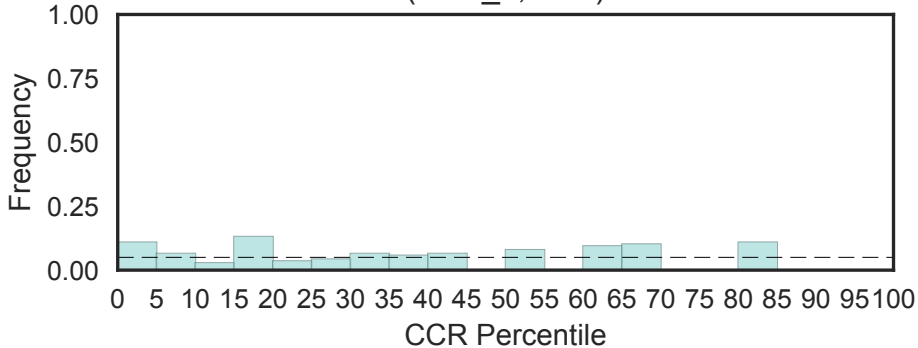

FerA (NUC095) domain  
(FerA, N=2)

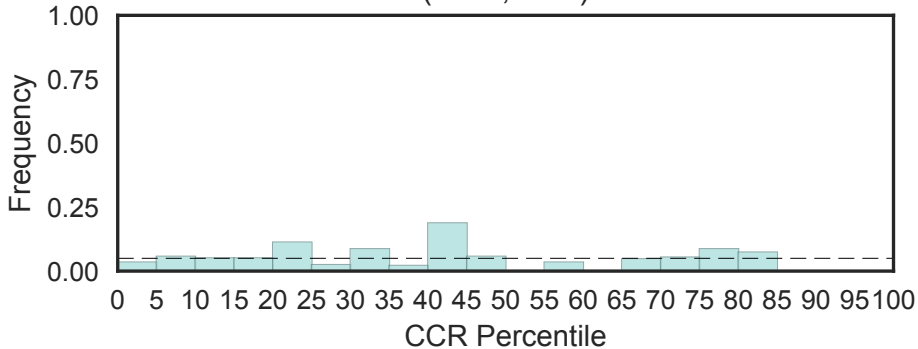



FerB (NUC096) domain  
(FerB, N=4)

Fisher's OR: 0; Bonferroni p-val: 1

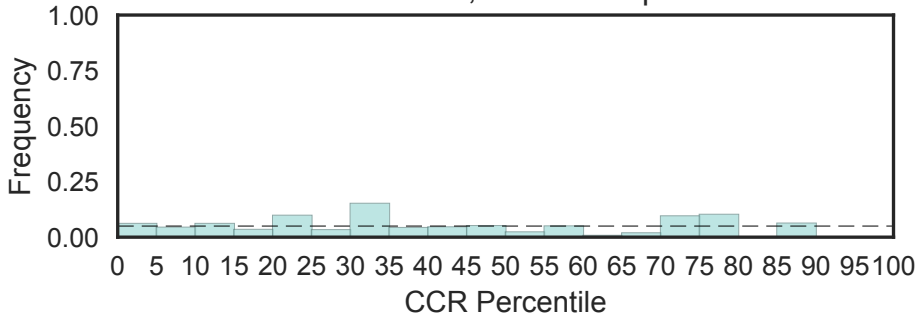

Fer1 (NUC094) domain  
(Fer1, N=4)

Fisher's OR: 0; Bonferroni p-val: 1

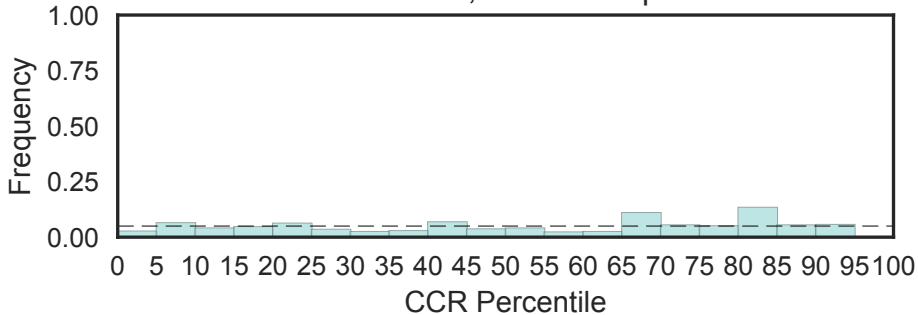

Ferlin C-terminus  
(Ferlin\_C, N=4)

Fisher's OR: 0; Bonferroni p-val: 1

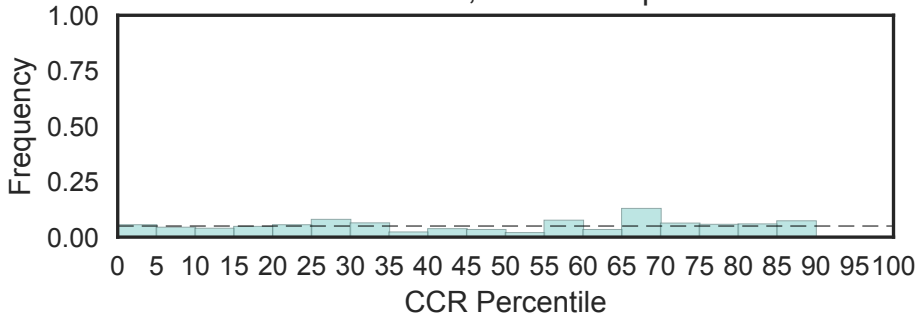

Ferric reductase like transmembrane component  
(Ferric\_reduct, N=10)

Fisher's OR: 0; Bonferroni p-val: 1

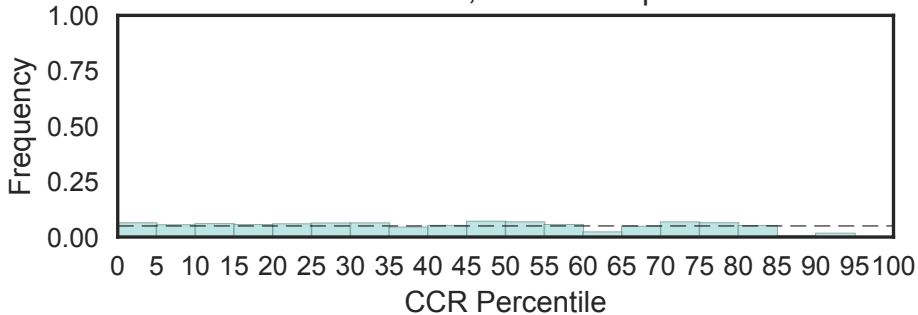

Ferritin-like domain  
(Ferritin, N=3)

Fisher's OR: 0; Bonferroni p-val: 1

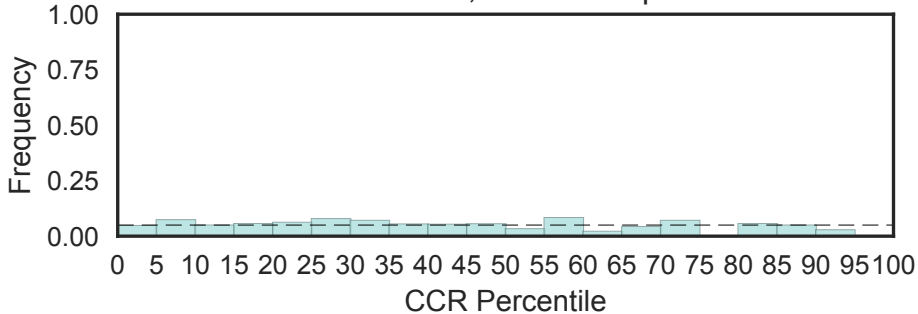

# Ferrochelatase (Ferrochelatase, N=1)

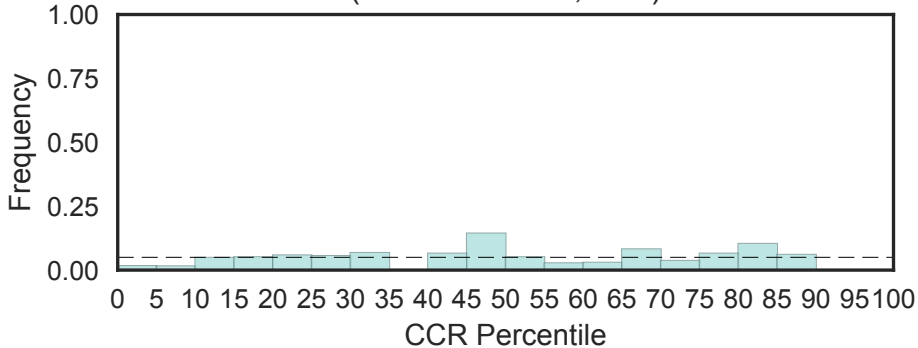

# Nucleotide exchange factor Fes1 (Fes1, N=1)

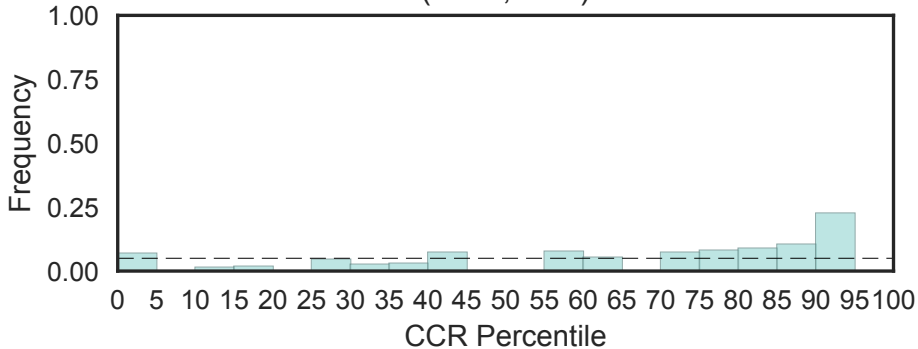

Fez1  
(Fez1, N=5)

Fisher's OR: 0.987; Bonferroni p-val: 1

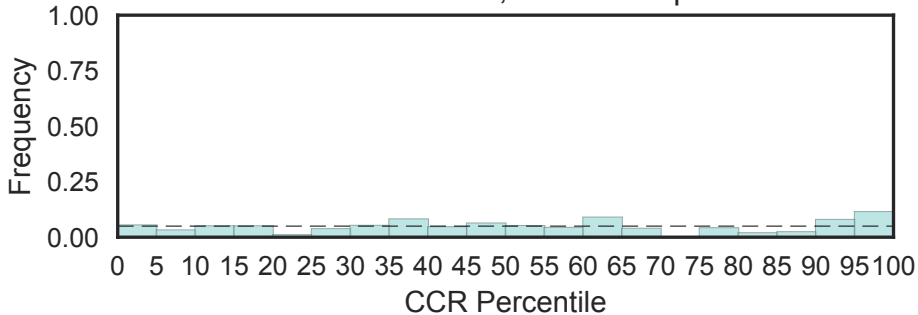



Fibrinogen alpha/beta chain family  
(Fib\_alpha, N=3)

Fisher's OR: 0; Bonferroni p-val: 1

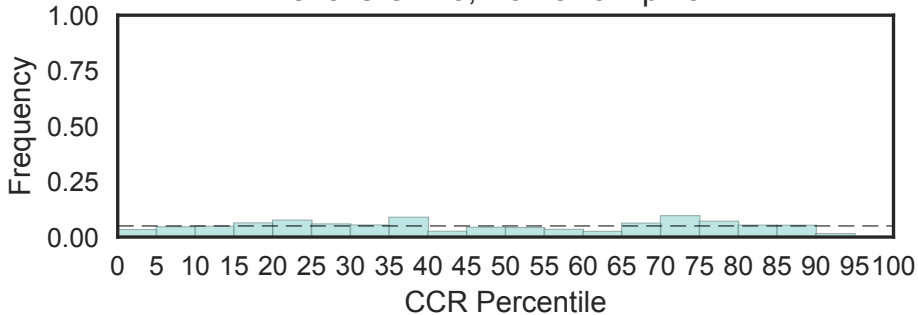

Fin bud initiation factor homologue  
(Fibin, N=1)

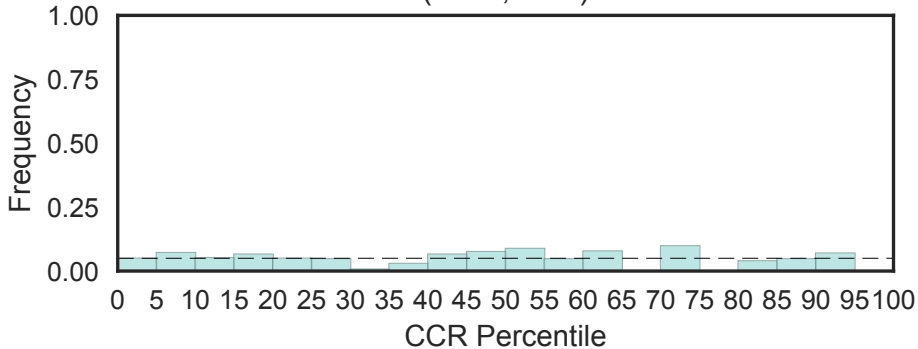

# Fibrillararin (Fibrillararin, N=2)

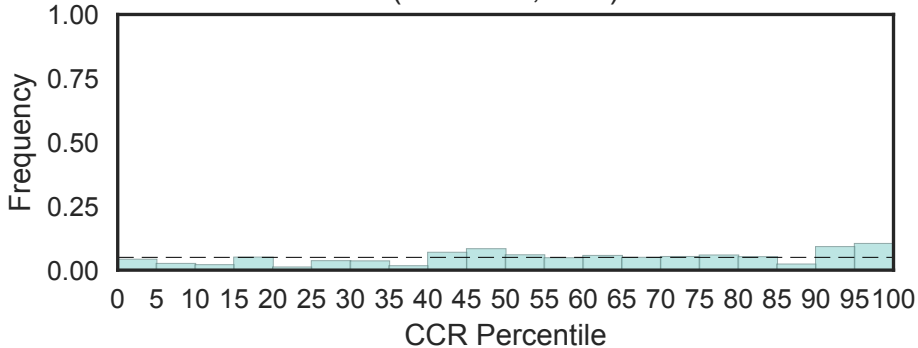

Fibrinogen beta and gamma chains, C-terminal globular domain  
(Fibrinogen\_C, N=24)

Fisher's OR: 0.364; Bonferroni p-val: 1

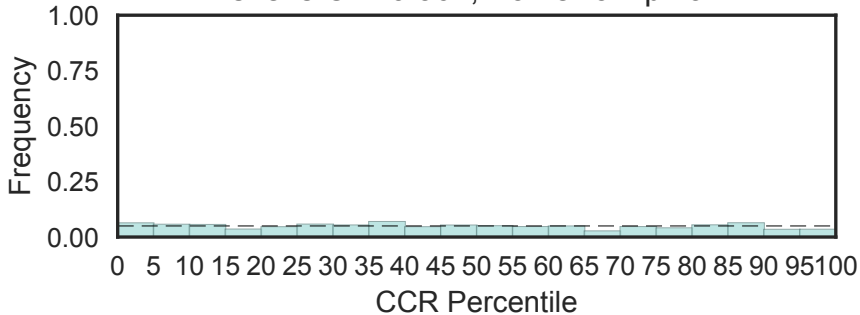

Fibrinogen alpha C domain  
(Fibrinogen\_aC, N=1)

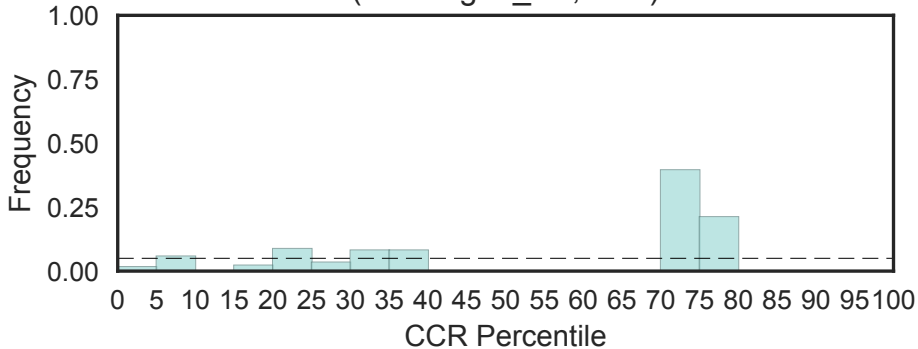

Fic/DOC family  
(Fic, N=1)

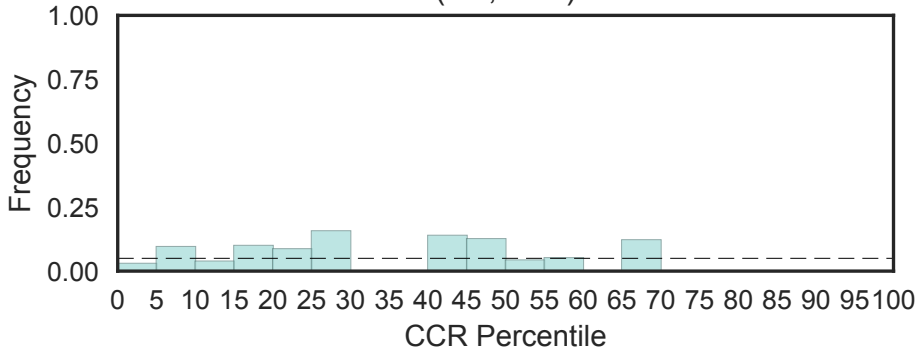

Filaggrin  
(Filaggrin, N=23)

Fisher's OR: 0; Bonferroni p-val: 1

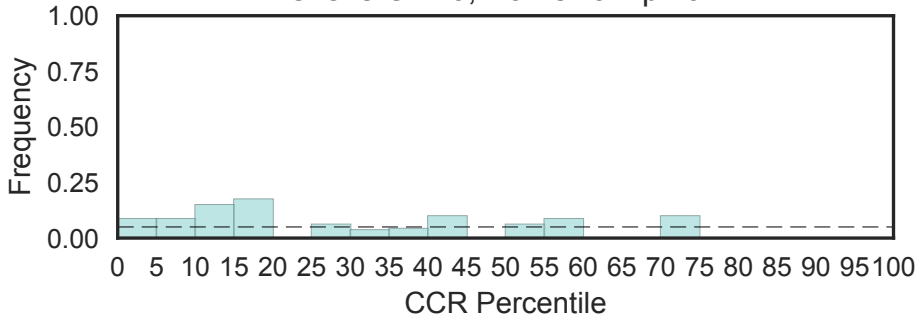

Intermediate filament protein  
(Filament, N=84)

Fisher's OR: 0.242; Bonferroni p-val: 1.4e-11

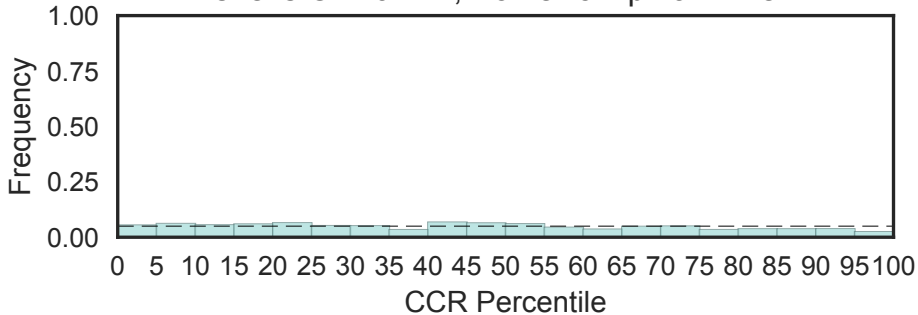



Intermediate filament head (DNA binding) region  
(Filament\_head, N=6)

Fisher's OR: 0.629; Bonferroni p-val: 1

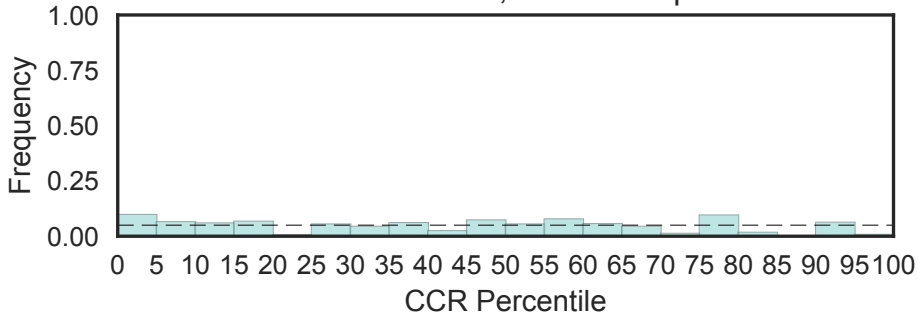

Filamin/ABP280 repeat  
(Filamin, N=53)

Fisher's OR: 0.183; Bonferroni p-val: 0.884

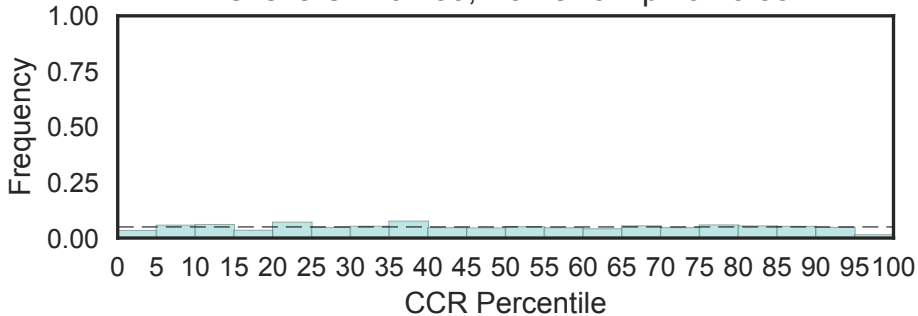

Fms-interacting protein  
(FimP, N=2)

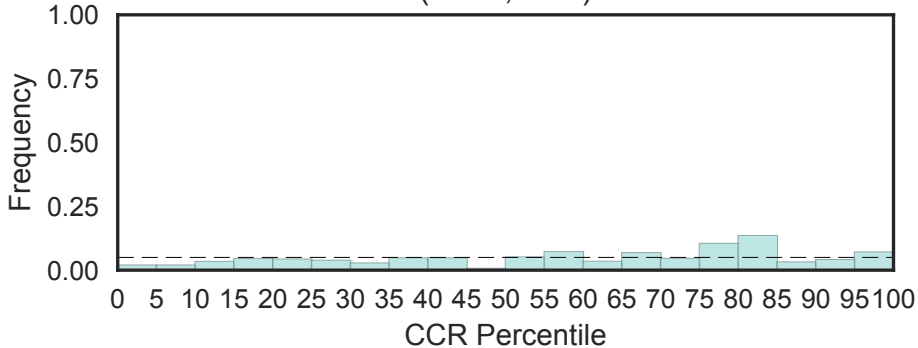

Fip1 motif  
(Fip1, N=1)

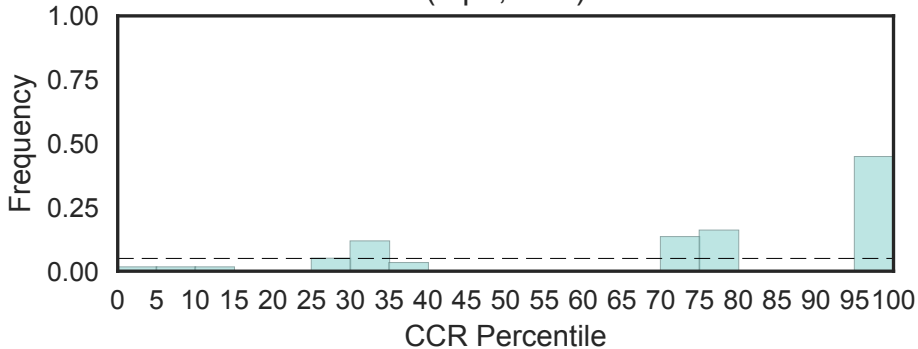

Fis1 C-terminal tetratricopeptide repeat  
(Fis1\_TPR\_C, N=1)

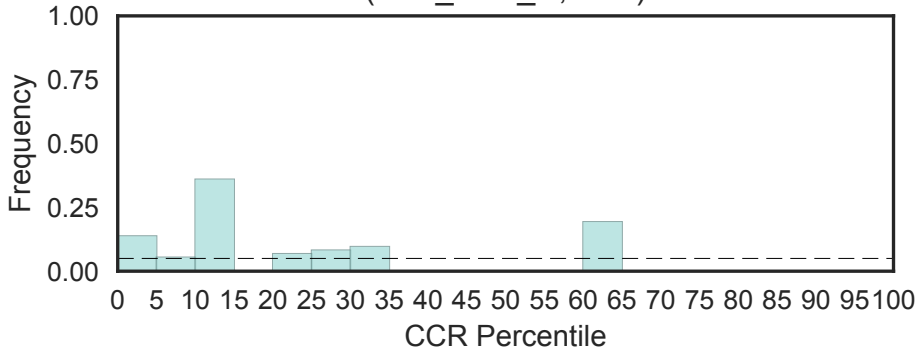

Fis1 N-terminal tetratricopeptide repeat  
(Fis1\_TPR\_N, N=1)

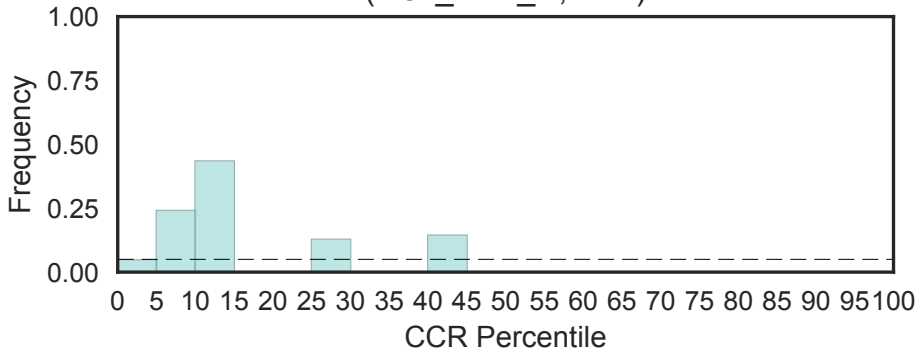

Flavodoxin  
(Flavodoxin\_1, N=8)  
Fisher's OR: 0.307; Bonferroni p-val: 1

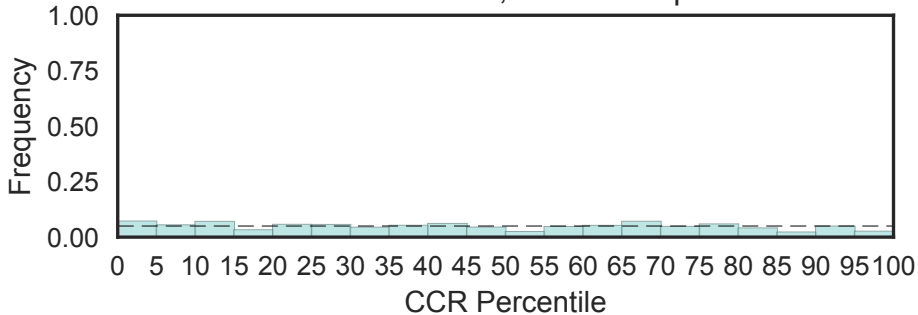

Flavodoxin-like fold  
(Flavodoxin\_2, N=2)

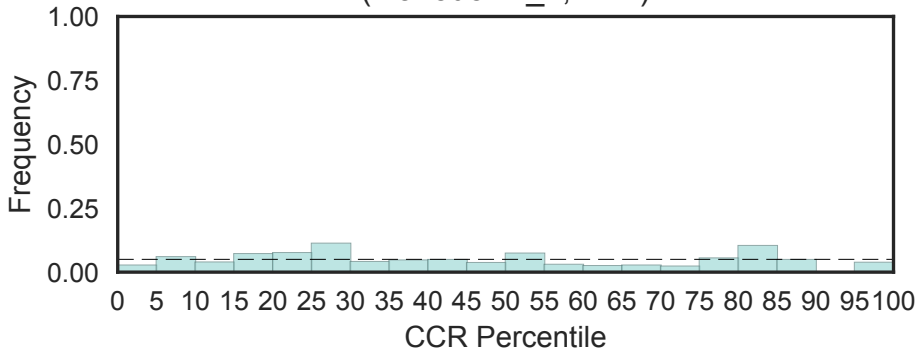



Riboflavin kinase  
(Flavokinase, N=1)

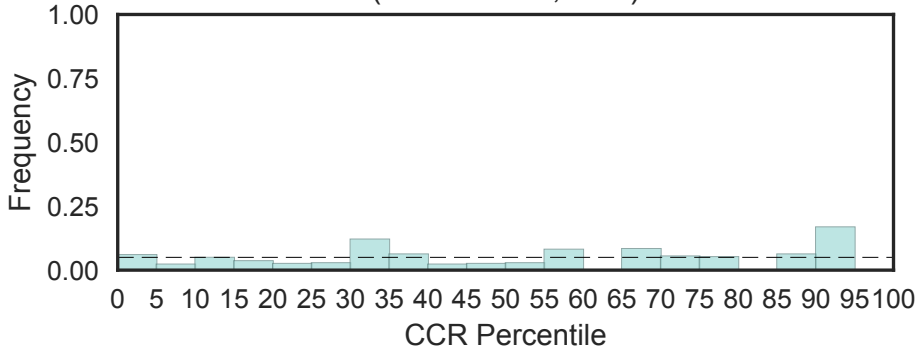

# Flavoprotein (Flavoprotein, N=1)

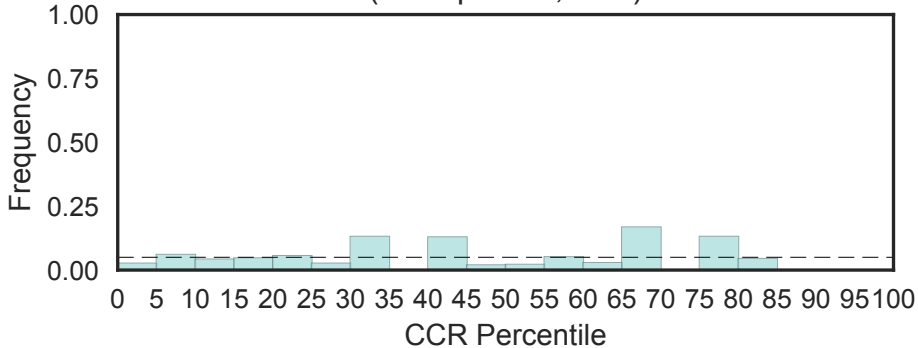

# Flotillin (Flot, N=2)

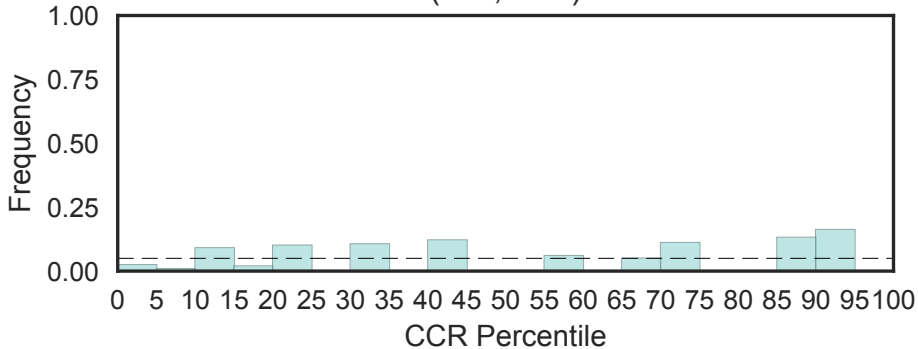

flt3 ligand  
(Flt3\_lig, N=1)

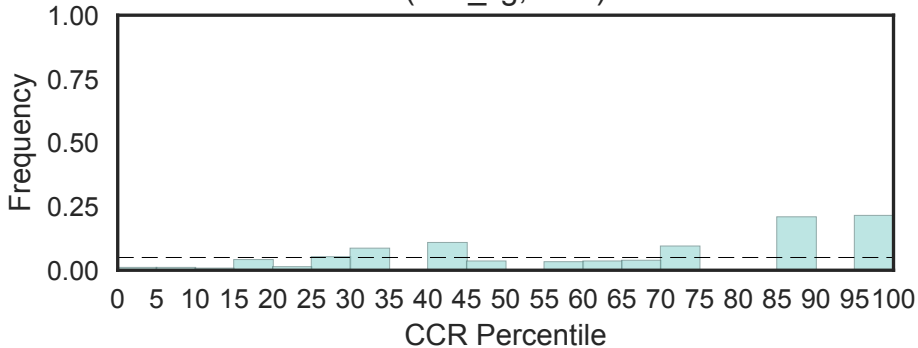

# Mitochondrial protein from FMP27 (Fmp27, N=2)

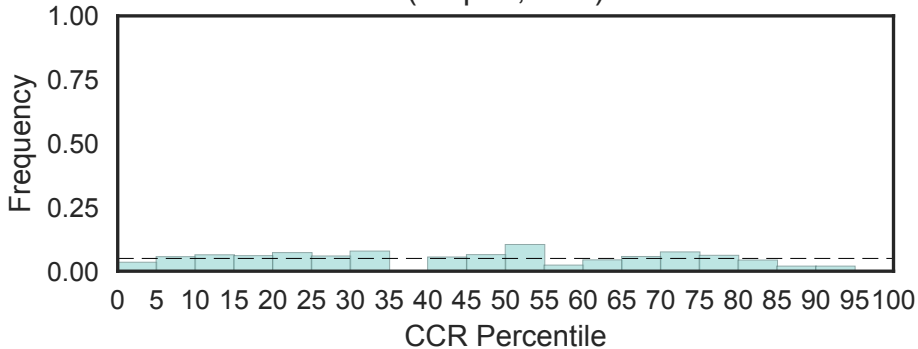

RNA pol II promoter Fmp27 protein domain  
(Fmp27\_GFWDK, N=1)

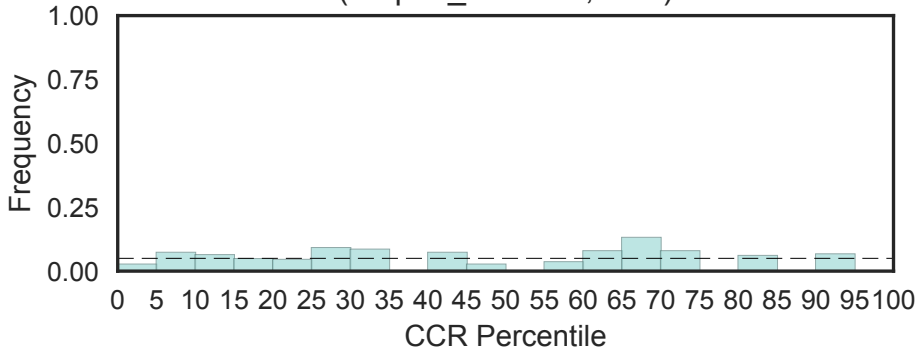

Fn3 associated  
(Fn3\_assoc, N=1)

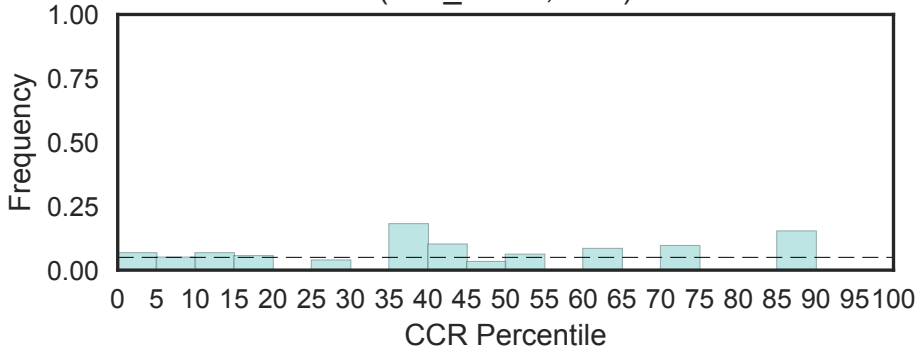

C-terminal duplication domain of Friend of PRMT1  
(FoP\_duplication, N=2)

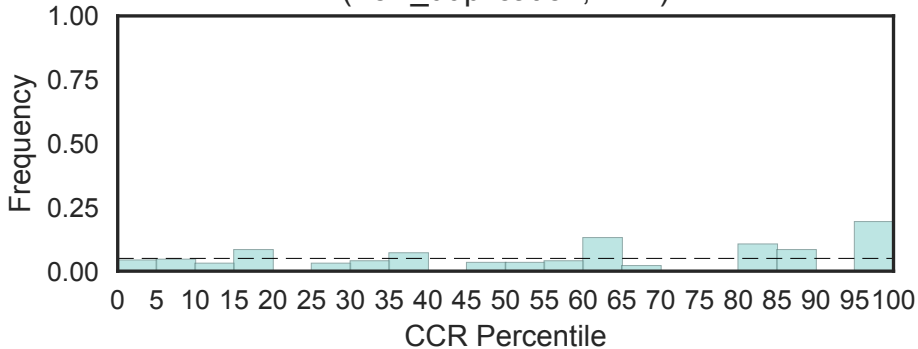



# Focadhesin (Focadhesin, N=1)

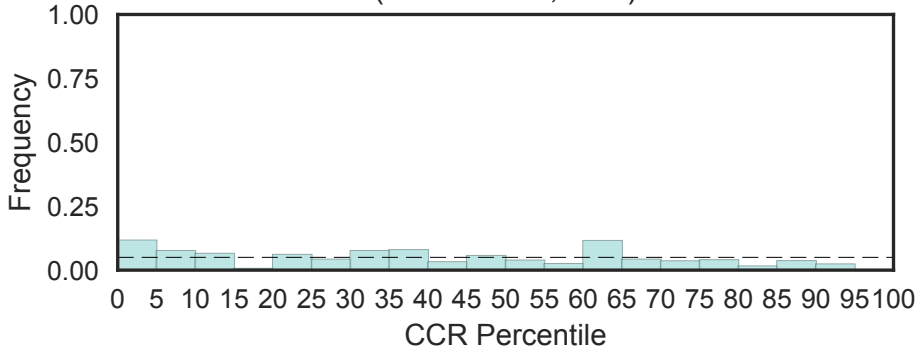

Focal adhesion targeting region  
(Focal\_AT, N=2)

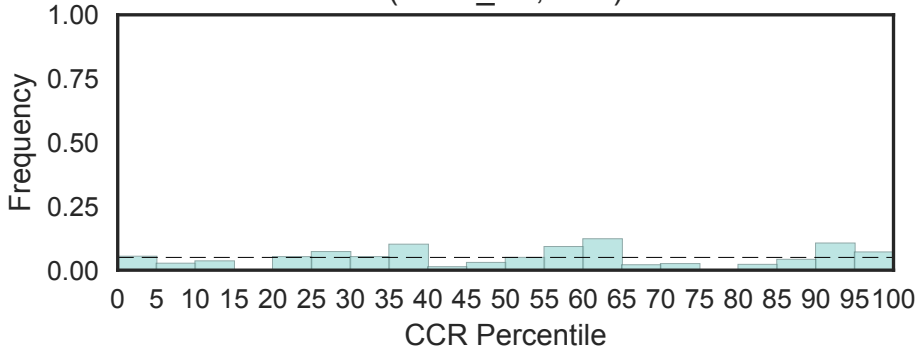

Foie gras liver health family 1  
(Foie-gras\_1, N=1)

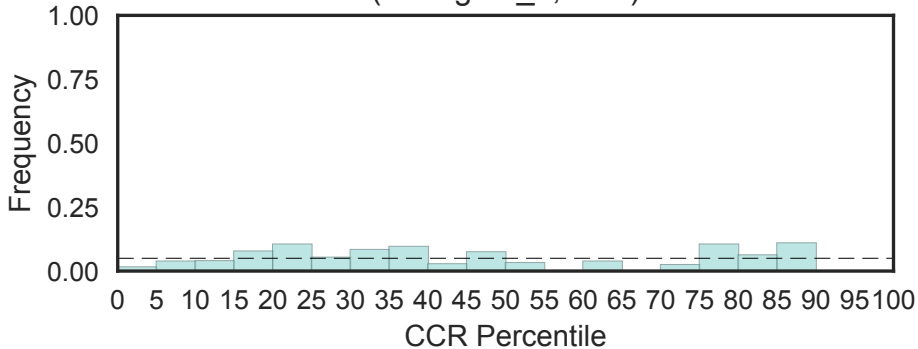

Reduced folate carrier  
(Folate\_carrier, N=4)  
Fisher's OR: 0; Bonferroni p-val: 1

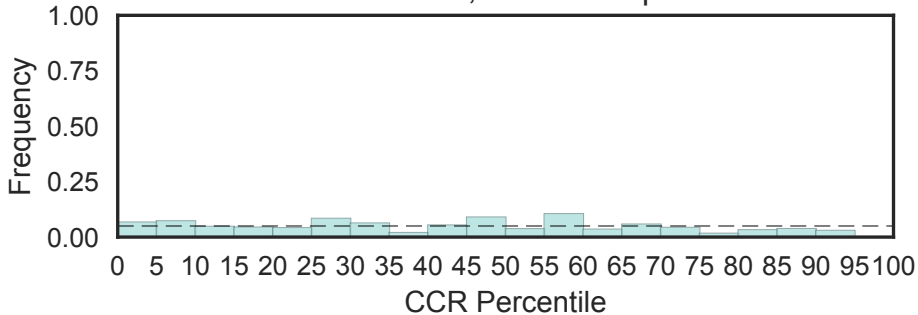

# Folate receptor family

(Folate\_rec, N=8)

Fisher's OR: 0; Bonferroni p-val: 1

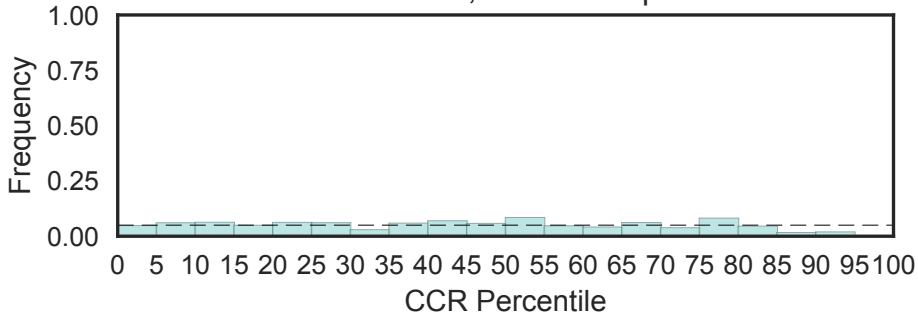

# Vesicle coat protein involved in Golgi to plasma membrane transport (Folliculin, N=2)

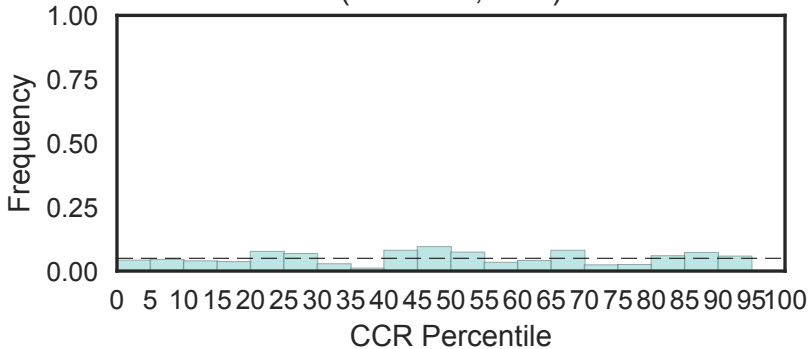

Folliculin C-terminal domain  
(Folliculin\_C, N=1)

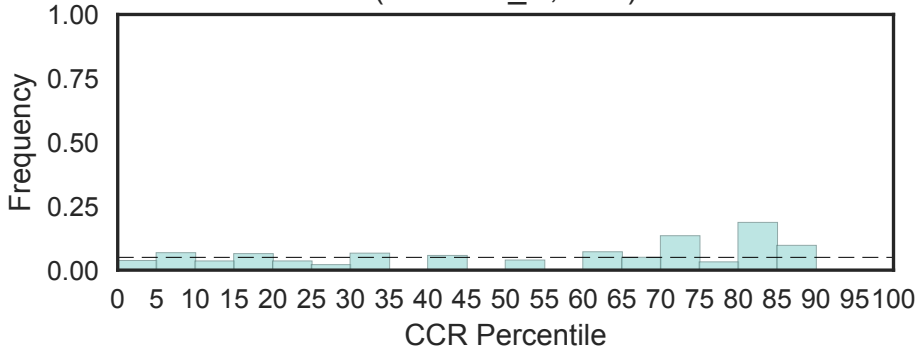

Forkhead domain  
(Forkhead, N=45)

Fisher's OR: 4.17; Bonferroni p-val: 4.19e-07

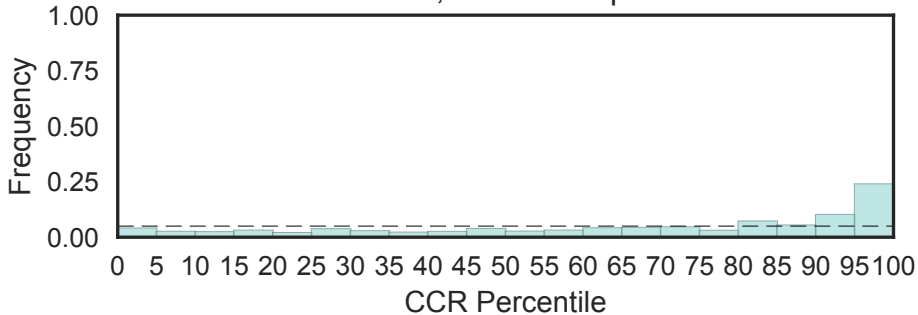



Forkhead N-terminal region  
(Forkhead\_N, N=3)

Fisher's OR: 0.588; Bonferroni p-val: 1

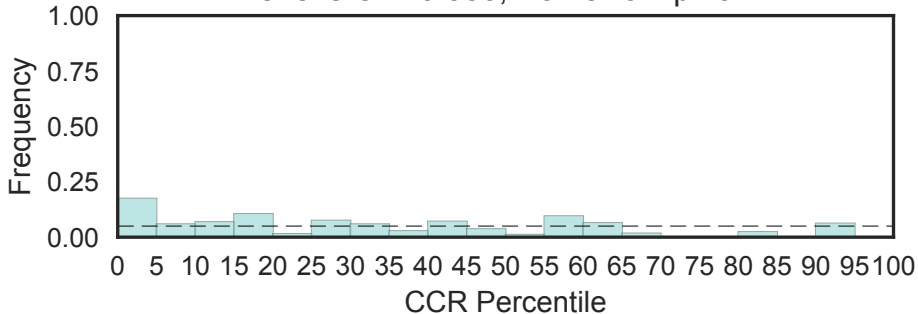

Formyl transferase, C-terminal domain  
(Formyl\_trans\_C, N=3)

Fisher's OR: 0; Bonferroni p-val: 1

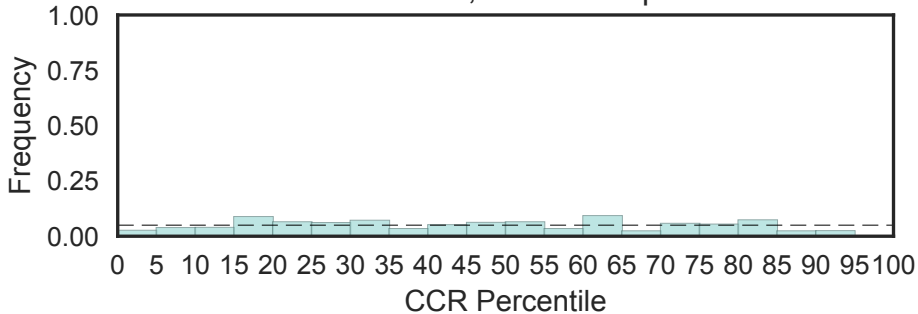

Formyl transferase  
(Formyl\_trans\_N, N=4)  
Fisher's OR: 0; Bonferroni p-val: 1

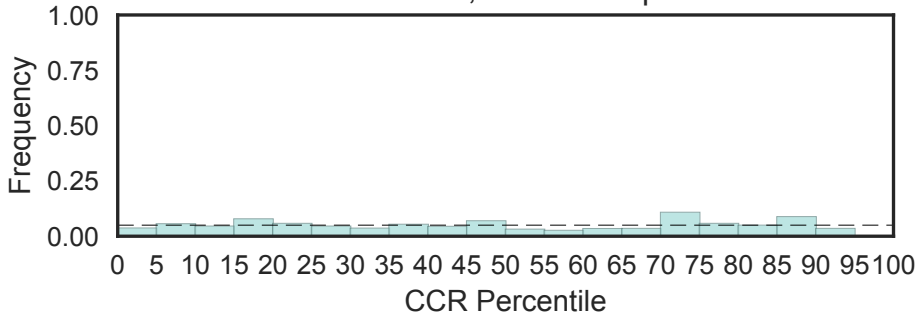

Calcitonin gene-related peptide regulator C terminal  
(Fox-1\_C, N=3)

Fisher's OR: 0; Bonferroni p-val: 1

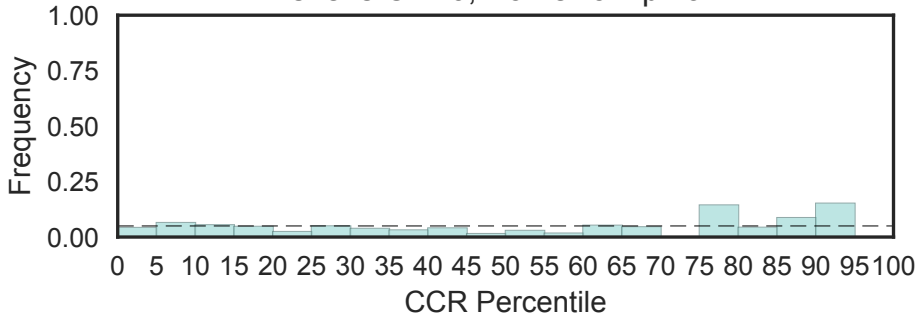

Folate-sensitive fragile site protein Fra10Ac1  
(Fra10Ac1, N=1)

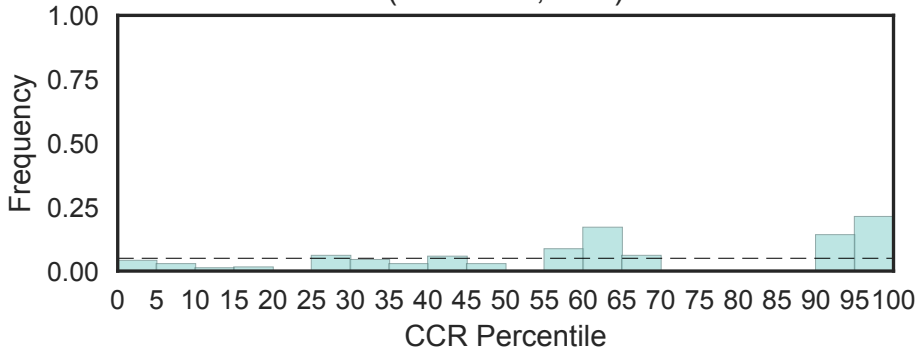

Frag1/DRAM/Sfk1 family  
(Frag1, N=6)

Fisher's OR: 0.206; Bonferroni p-val: 1

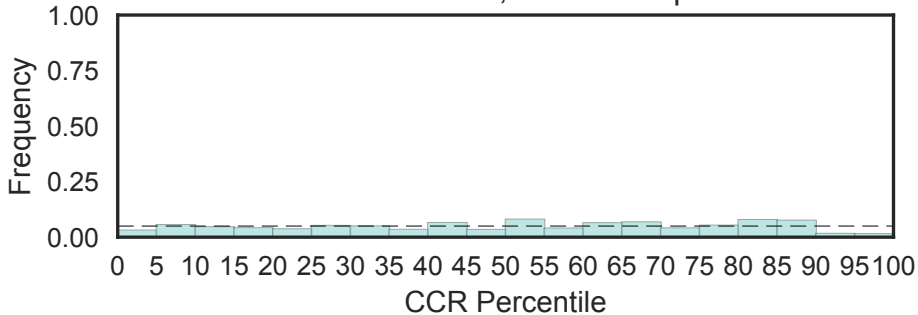

Cytoplasmic Fragile-X interacting family  
(FragX\_IP, N=5)

Fisher's OR: 2.05; Bonferroni p-val: 1

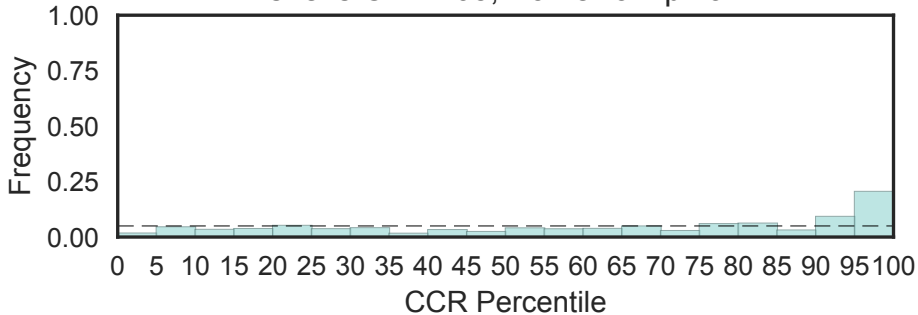

Frataxin-like domain  
(Frataxin\_Cyay, N=1)

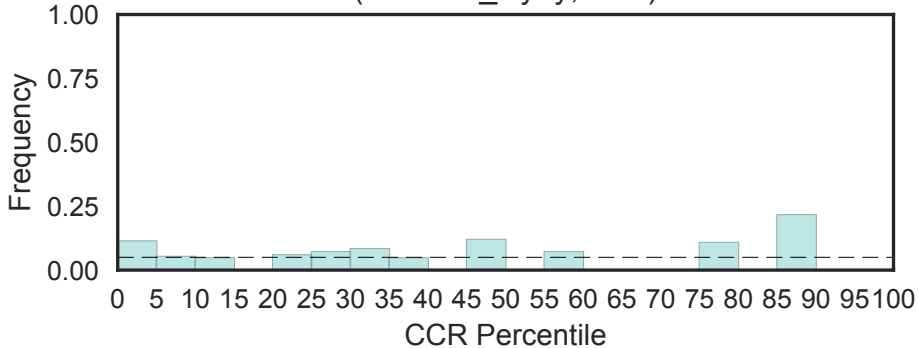



Fringe-like  
(Fringe, N=13)

Fisher's OR: 0.399; Bonferroni p-val: 1

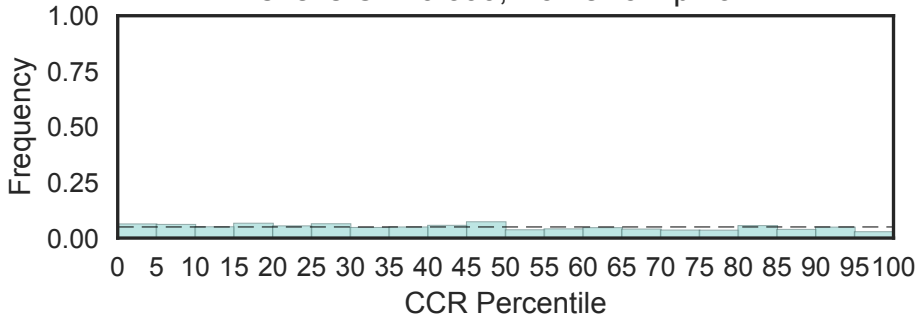

Frizzled/Smoothened family membrane region  
(Frizzled, N=13)

Fisher's OR: 1.14; Bonferroni p-val: 1

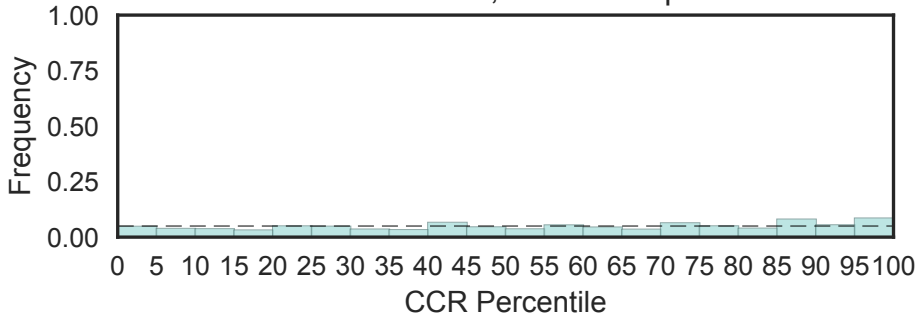

# WD repeat-containing and planar cell polarity effector protein Fritz (Frtz, N=1)

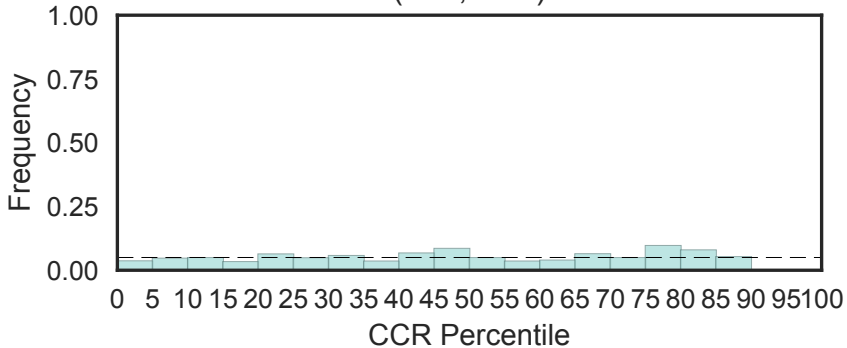

Fructosamine kinase  
(Fructosamin\_kin, N=2)

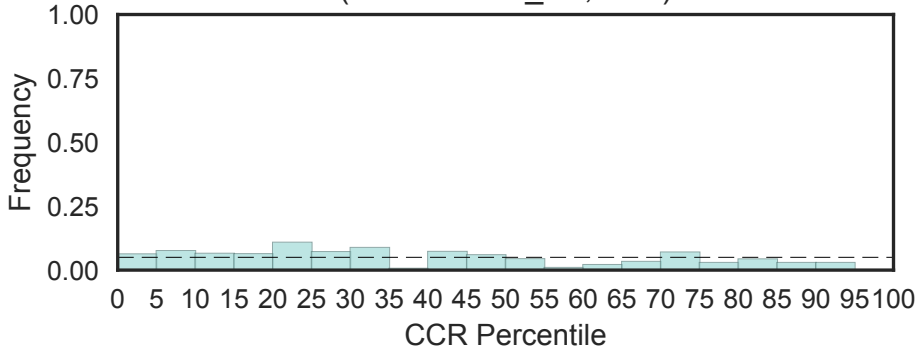

# FtsH Extracellular (FtsH\_ext, N=2)

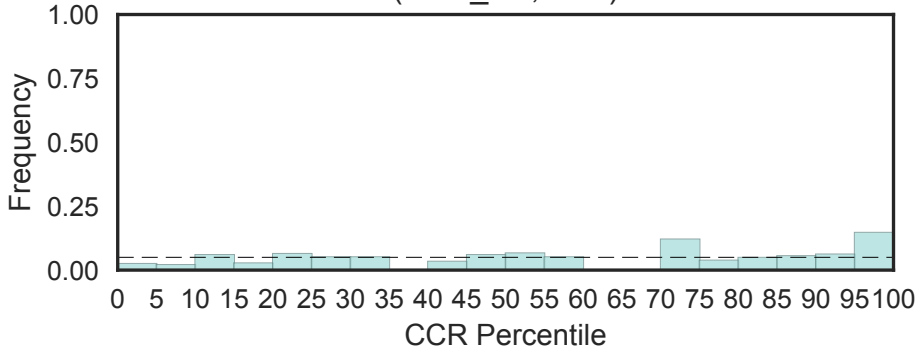

FtsJ-like methyltransferase  
(FtsJ, N=5)

Fisher's OR: 1.22; Bonferroni p-val: 1

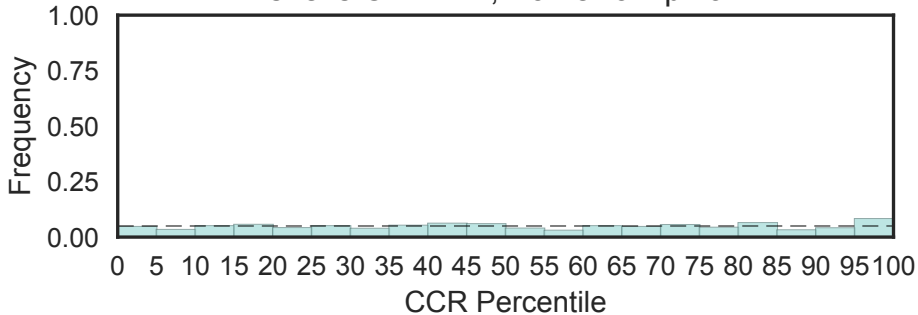

L-fucokinase  
(Fucokinase, N=4)

Fisher's OR: 0; Bonferroni p-val: 1

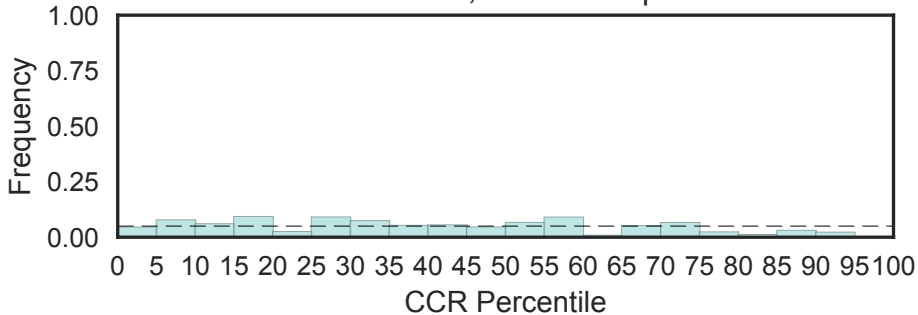

Alpha-L-fucosidase C-terminal domain  
(Fucosidase\_C, N=2)

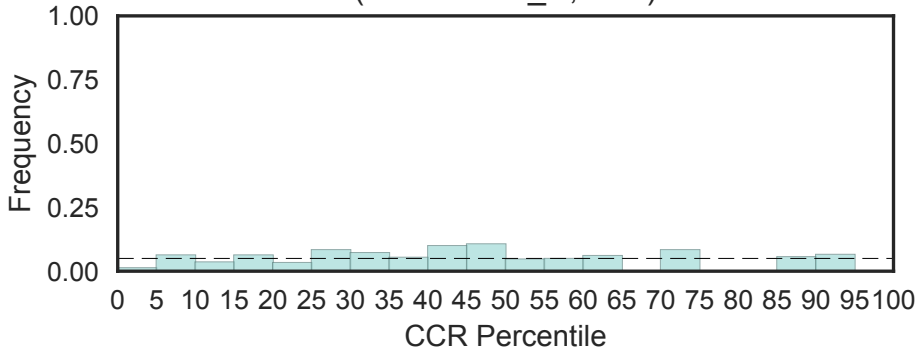



Fumarase C C-terminus  
(FumaraseC\_C, N=1)

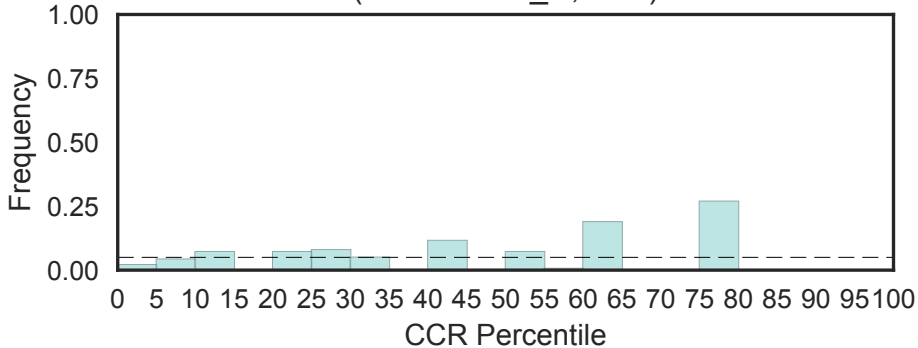

Fumble  
(Fumble, N=4)

Fisher's OR: 0.752; Bonferroni p-val: 1

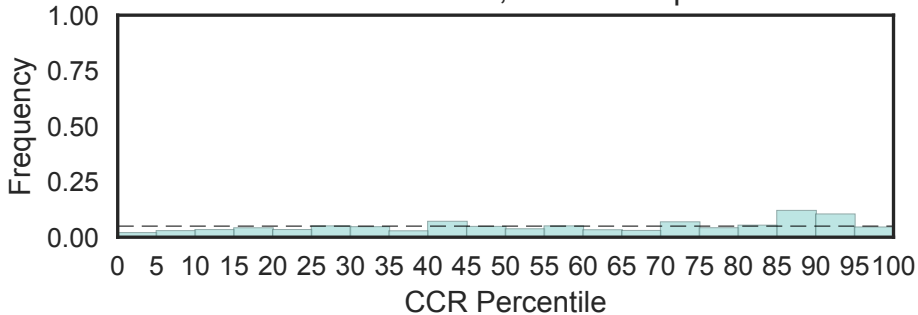

Furin-like cysteine rich region  
(Furin-like, N=9)

Fisher's OR: 0.228; Bonferroni p-val: 1

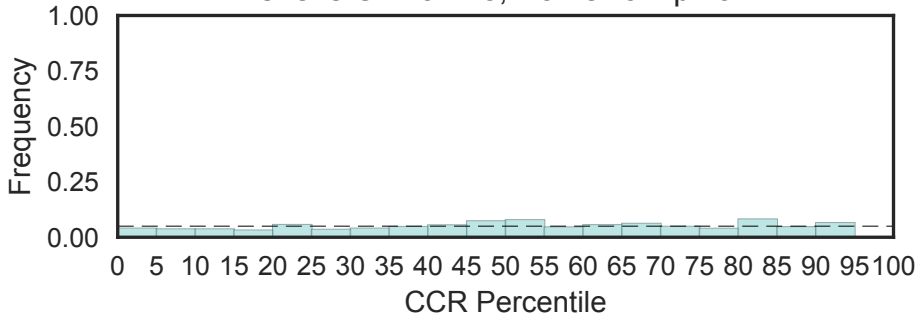

Furin-like repeat, cysteine-rich  
(Furin-like\_2, N=5)

Fisher's OR: 0.978; Bonferroni p-val: 1

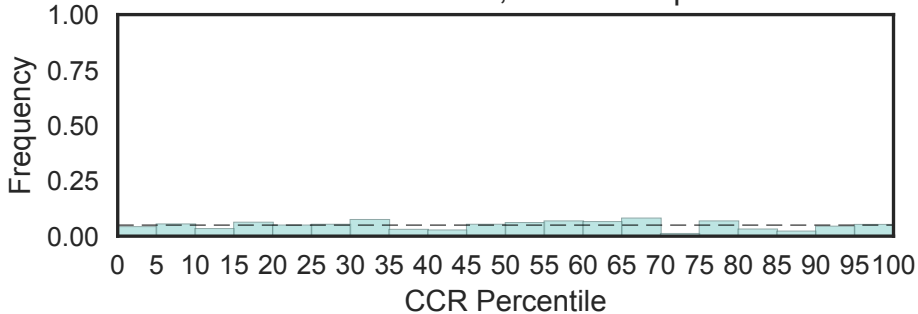

Fz domain  
(Fz, N=23)

Fisher's OR: 0.358; Bonferroni p-val: 1

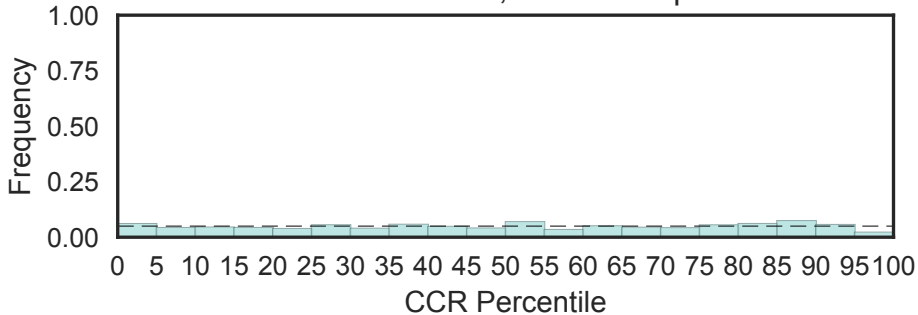

fzo-like conserved region  
(Fzo\_mitofusin, N=2)

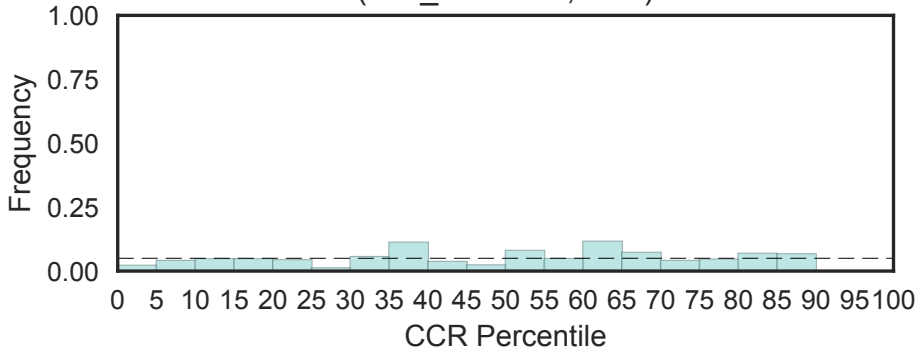

G-protein alpha subunit  
(G-alpha, N=17)

Fisher's OR: 3.05; Bonferroni p-val: 1.12e-07

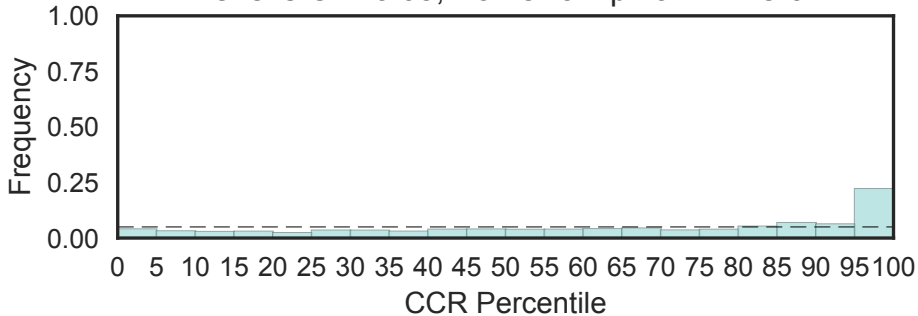

GGL domain  
(G-gamma, N=18)  
Fisher's OR: 0.46; Bonferroni p-val: 1

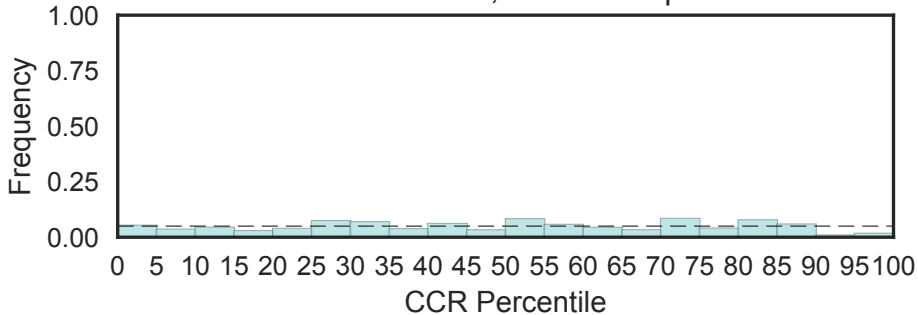



G-patch domain  
(G-patch, N=21)

Fisher's OR: 2.9; Bonferroni p-val: 1

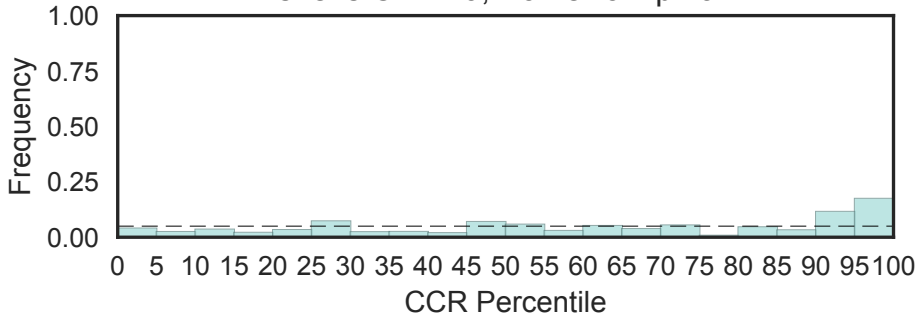

G-patch domain  
(G-patch\_2, N=9)

Fisher's OR: 1.73; Bonferroni p-val: 1

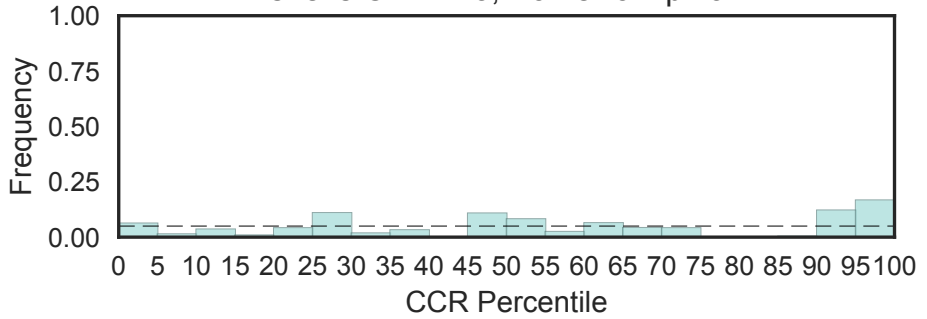

G0/G1 switch protein 2  
(G0-G1\_switch\_2, N=1)

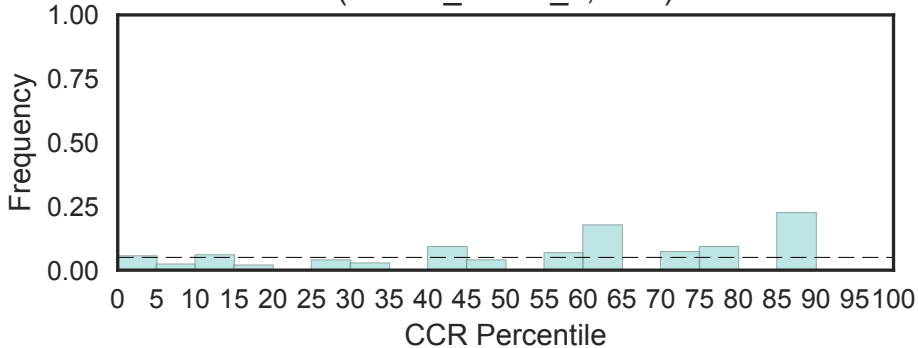

G10 protein  
(G10, N=1)

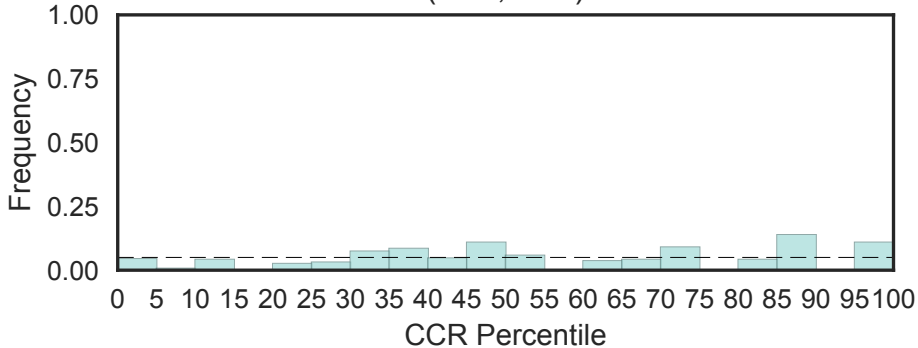

G2F domain  
(G2F, N=3)

Fisher's OR: 0.498; Bonferroni p-val: 1

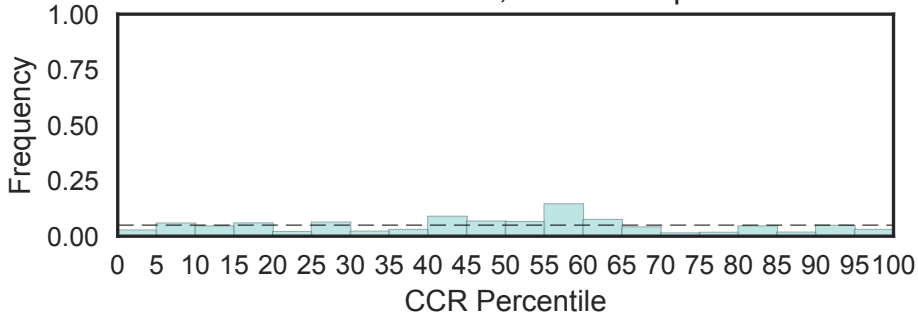

# Glucose-6-phosphate dehydrogenase, C-terminal domain (G6PD\_C, N=1)

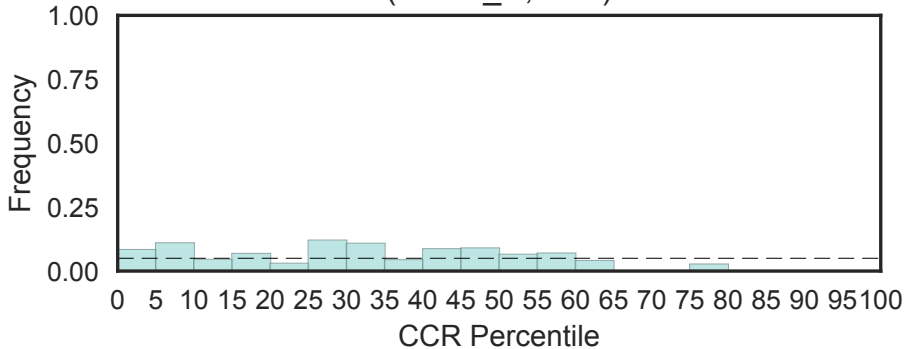

# Glucose-6-phosphate dehydrogenase, NAD binding domain (G6PD\_N, N=1)

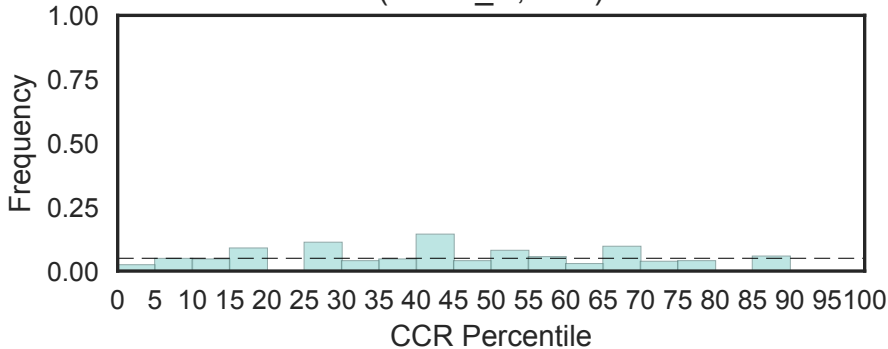

G8 domain  
(G8, N=6)

Fisher's OR: 0; Bonferroni p-val: 1

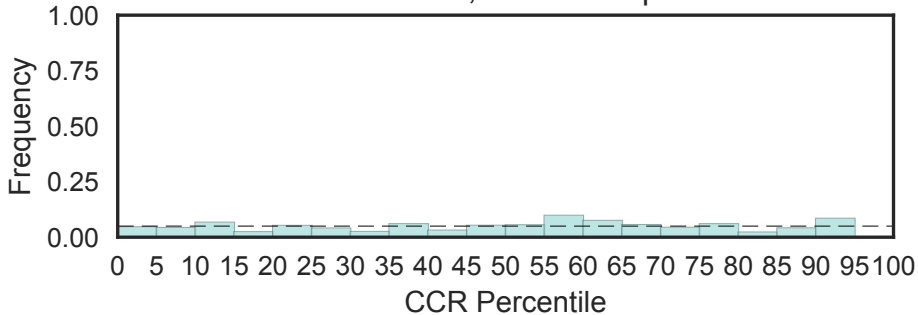



GA-binding protein alpha chain  
(GABP-alpha, N=1)

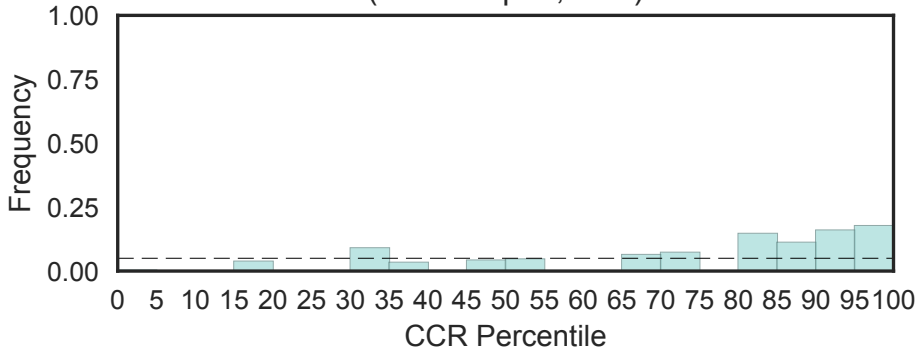

GAD domain  
(GAD, N=1)

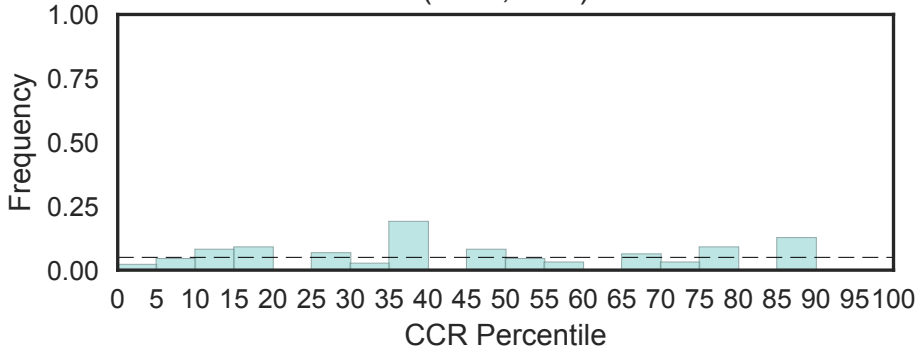

GAF domain  
(GAF, N=14)

Fisher's OR: 0.473; Bonferroni p-val: 1

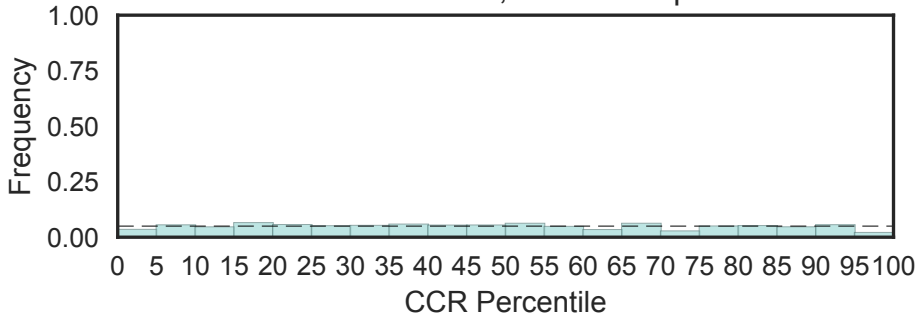

GAF domain  
(GAF\_2, N=4)

Fisher's OR: 0.584; Bonferroni p-val: 1

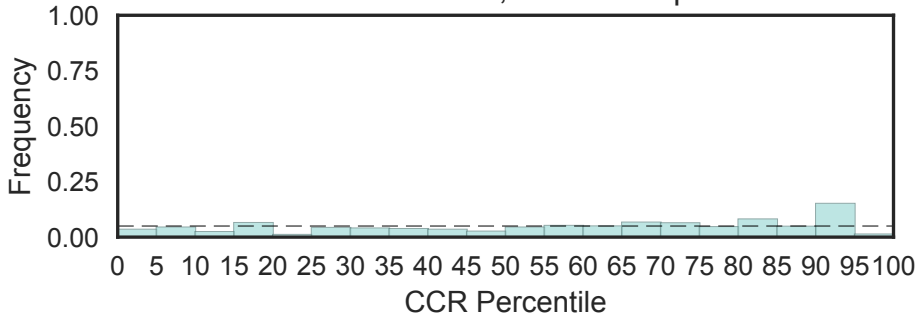

GAF domain  
(GAF\_3, N=1)

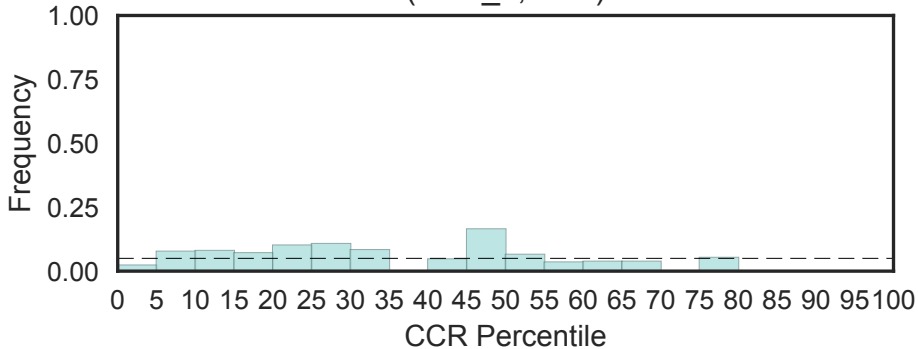

# GAGE protein (GAGE, N=1)

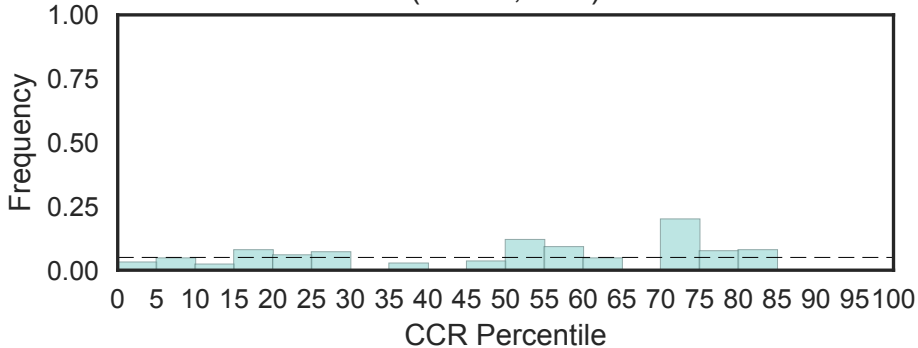

GPCR-Autoproteolysis INDucing (GAIN) domain  
(GAIN, N=13)

Fisher's OR: 0.611; Bonferroni p-val: 1

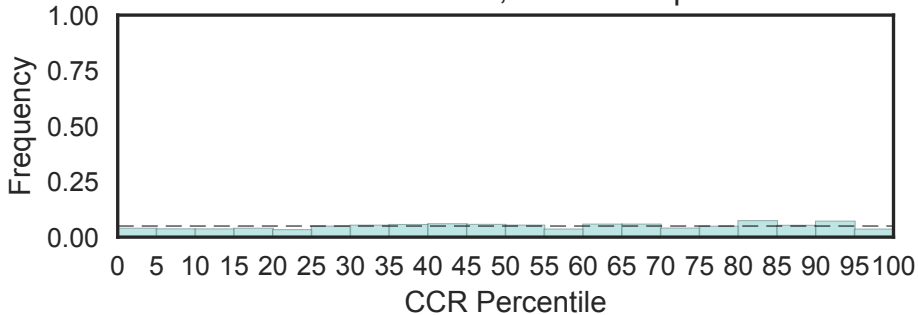

GRB2-binding adapter (GAPT)  
(GAPT, N=1)

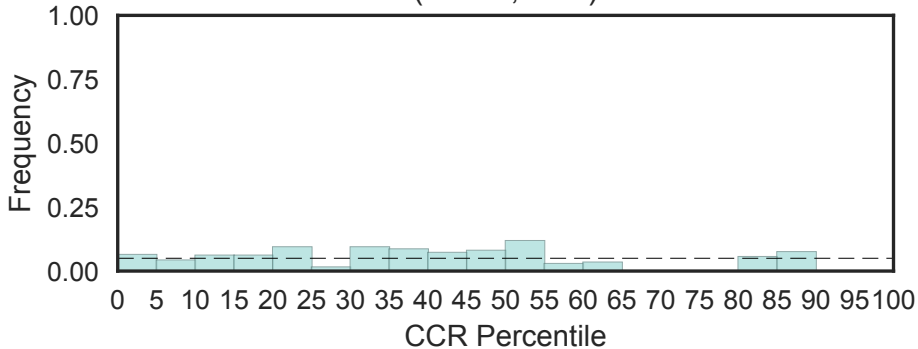



# Phosphoribosylglycinamide synthetase, ATP-grasp (A) domain (GARS\_A, N=1)

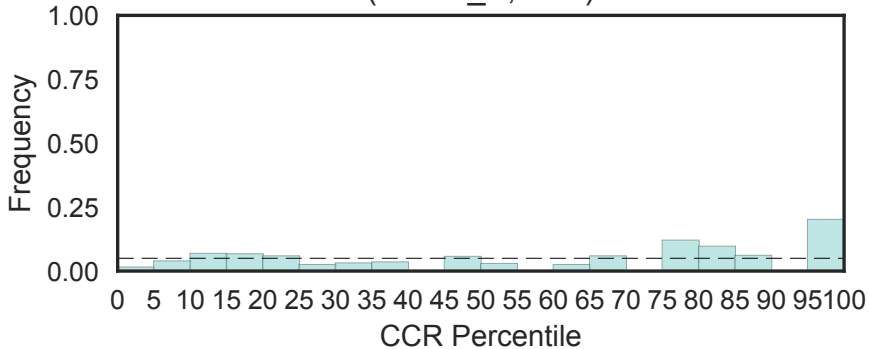

Phosphoribosylglycinamide synthetase, C domain  
(GARS\_C, N=1)

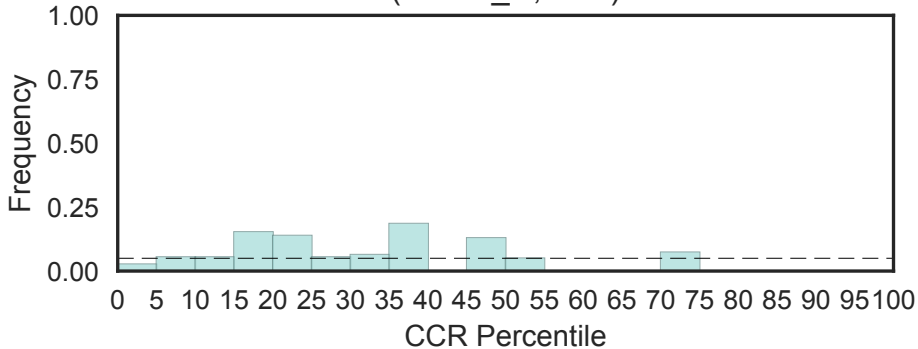

Phosphoribosylglycinamide synthetase, N domain  
(GARS\_N, N=1)

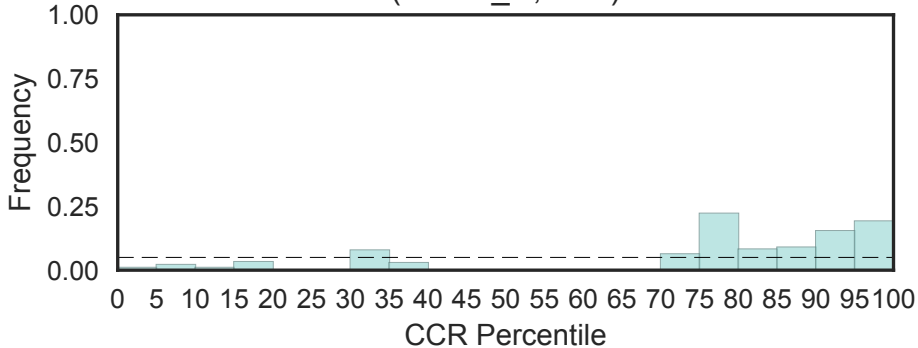

# Growth-arrest specific micro-tubule binding (GAS, N=1)

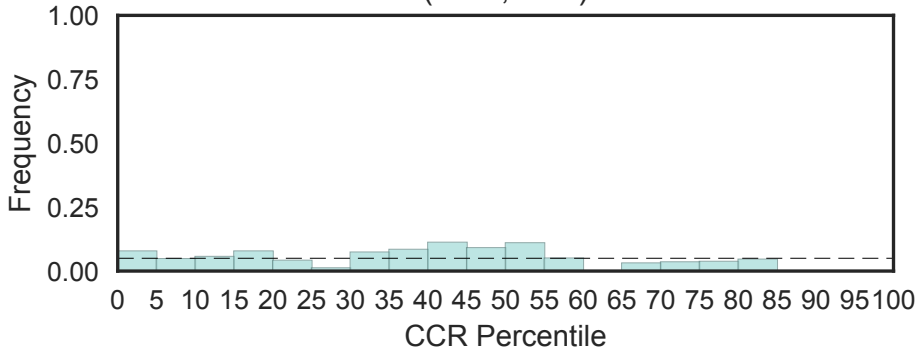

Growth-Arrest-Specific Protein 2 Domain  
(GAS2, N=6)

Fisher's OR: 3.05; Bonferroni p-val: 1

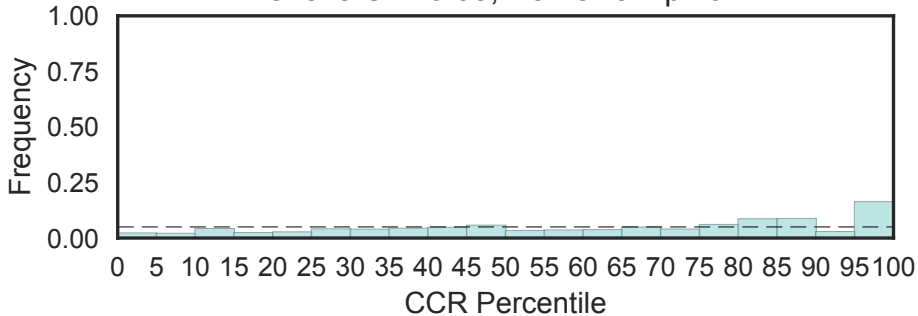

GAT domain  
(GAT, N=6)

Fisher's OR: 0.549; Bonferroni p-val: 1

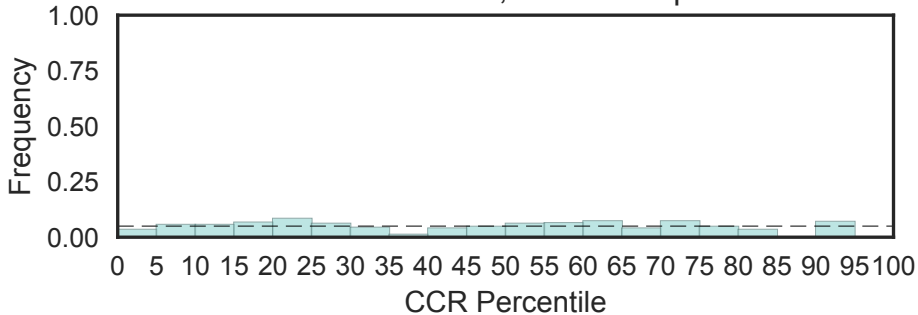

GATA zinc finger  
(GATA, N=18)

Fisher's OR: 15.9; Bonferroni p-val: 2.14e-09

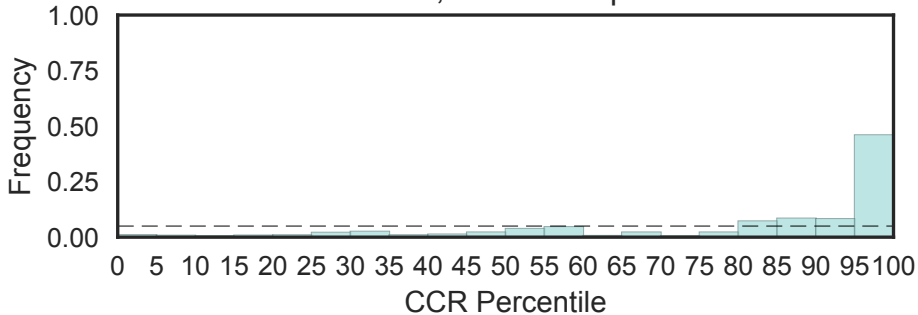

GATA-type transcription activator, N-terminal  
(GATA-N, N=3)

Fisher's OR: 0; Bonferroni p-val: 1

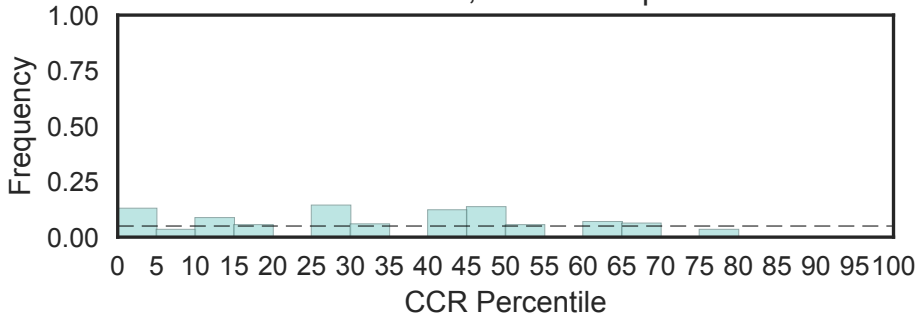



Glutamine amidotransferase class-I  
(GATase, N=5)

Fisher's OR: 0.358; Bonferroni p-val: 1

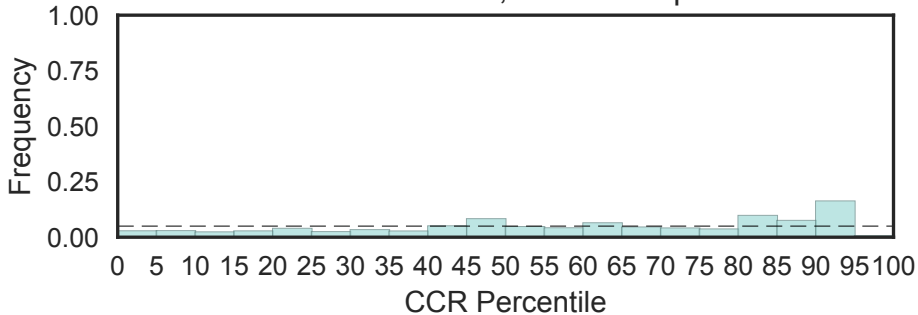

Glutamine amidotransferases class-II  
(GATase\_4, N=3)

Fisher's OR: 1.64; Bonferroni p-val: 1

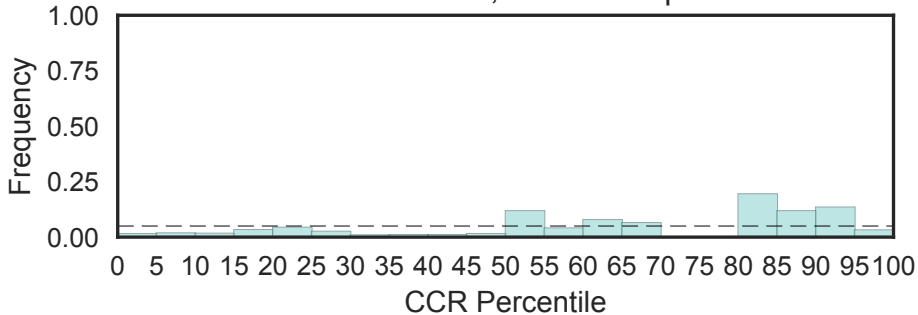

CobB/CobQ-like glutamine amidotransferase domain  
(GATase\_5, N=1)

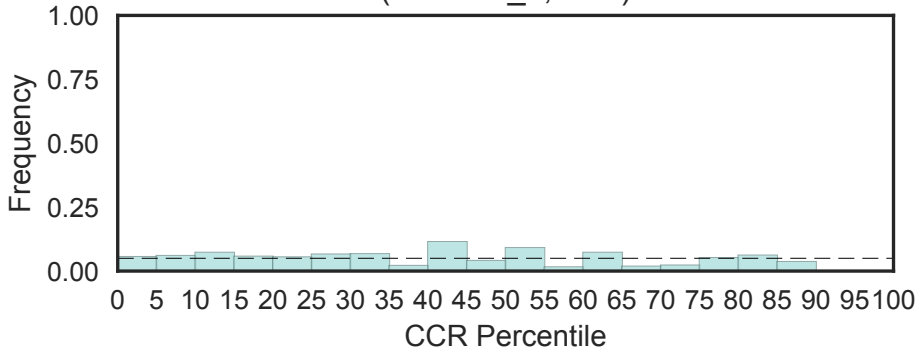

Glutamine amidotransferase domain  
(GATase\_6, N=4)

Fisher's OR: 1.13; Bonferroni p-val: 1

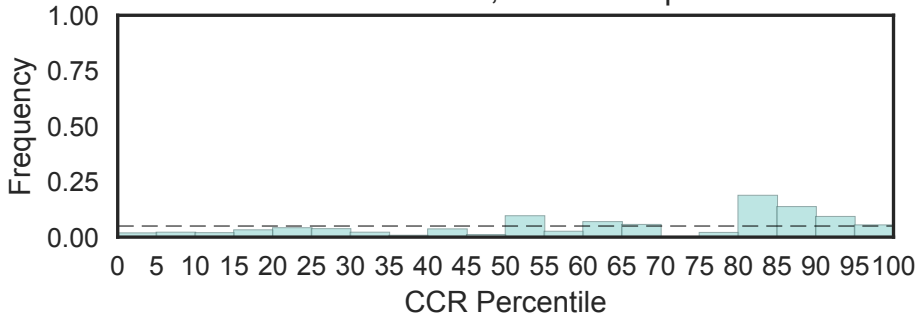

Glutamine amidotransferase domain  
(GATase\_7, N=4)

Fisher's OR: 1.29; Bonferroni p-val: 1

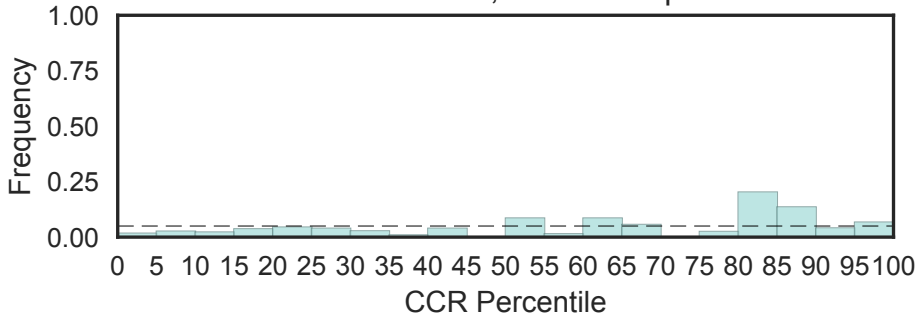

Guanylate-binding protein, N-terminal domain  
(GBP, N=11)

Fisher's OR: 0.898; Bonferroni p-val: 1

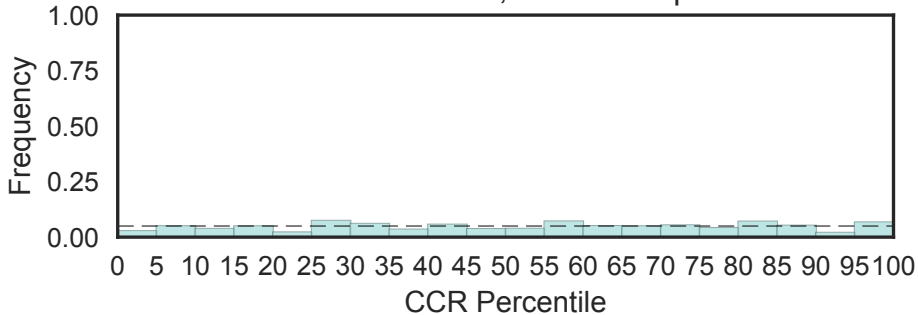

Guanylate-binding protein, C-terminal domain  
(GBP\_C, N=9)

Fisher's OR: 0.125; Bonferroni p-val: 1

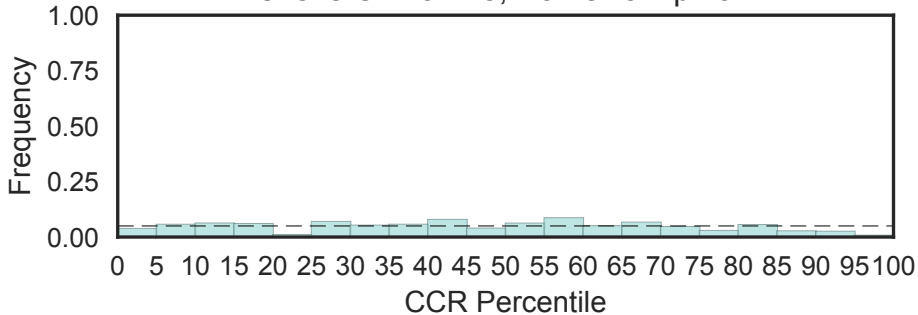

tRNA methyltransferase complex GCD14 subunit  
(GCD14, N=3)

Fisher's OR: 0.476; Bonferroni p-val: 1

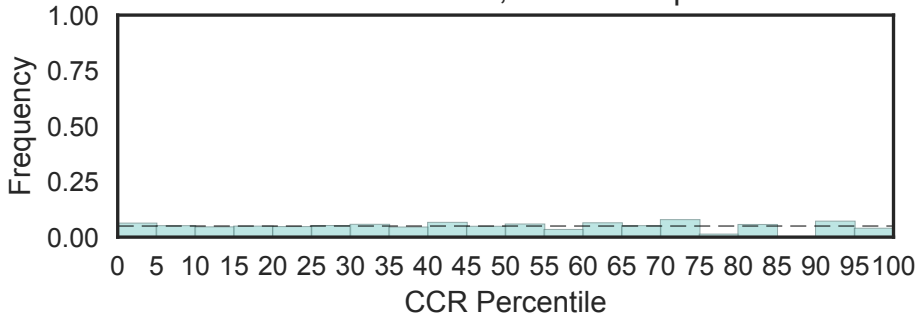



GC-rich sequence DNA-binding factor-like protein  
(GCFC, N=5)

Fisher's OR: 0.441; Bonferroni p-val: 1

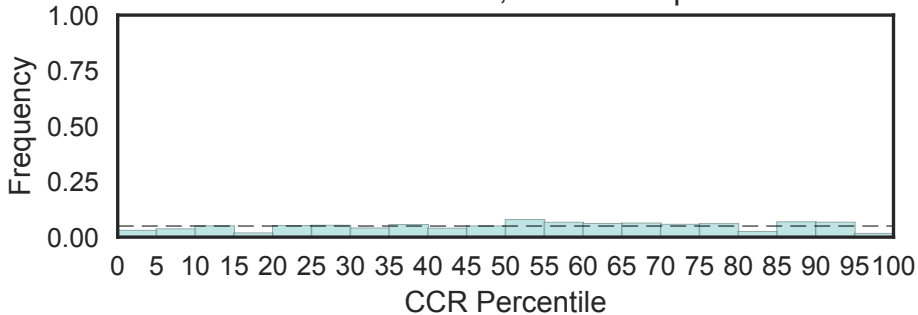

# Grp2 and cyclin-D-interacting (GCIP, N=2)

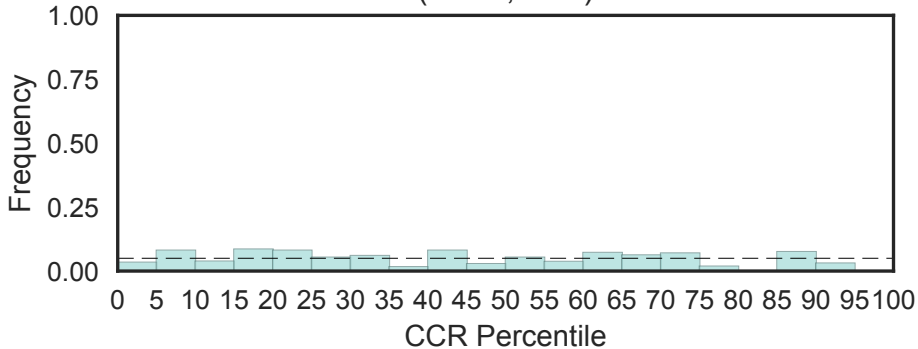

# GCM motif protein (GCM, N=2)

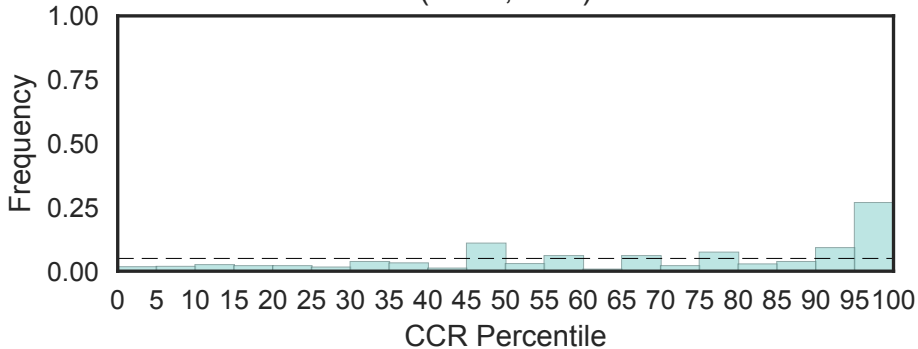

GCN5-like protein 1 (GCN5L1)  
(GCN5L1, N=3)

Fisher's OR: 2.02; Bonferroni p-val: 1

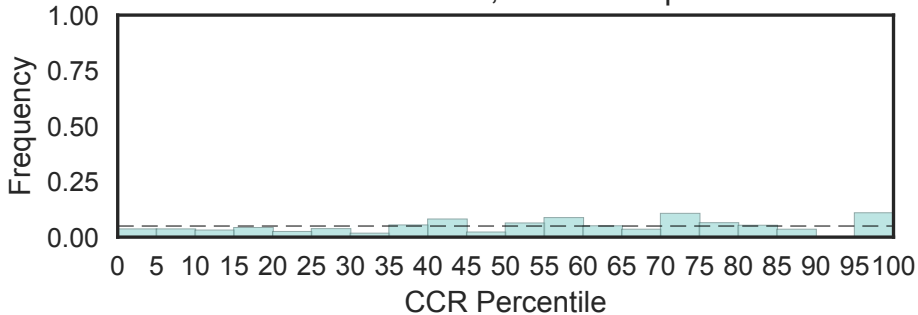

Putative GRINL1B complex locus protein 2  
(GCOM2, N=3)

Fisher's OR: 0; Bonferroni p-val: 1

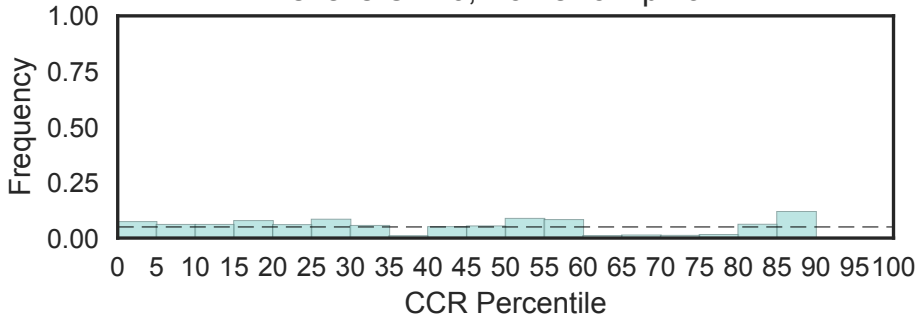

# Glucocorticoid receptor (GCR, N=1)

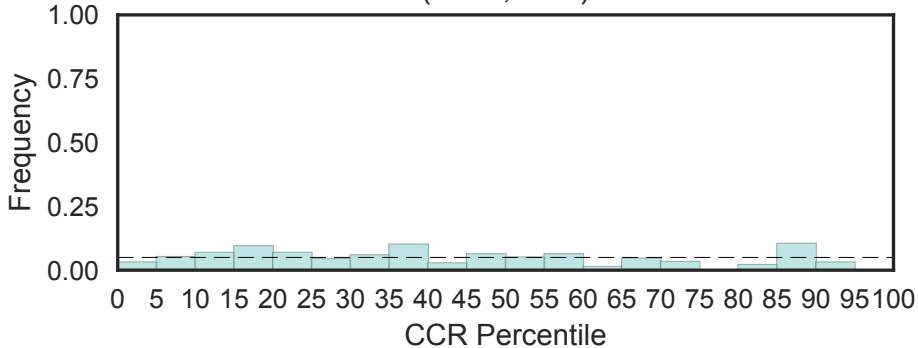

# Glutamate-cysteine ligase (GCS, N=1)

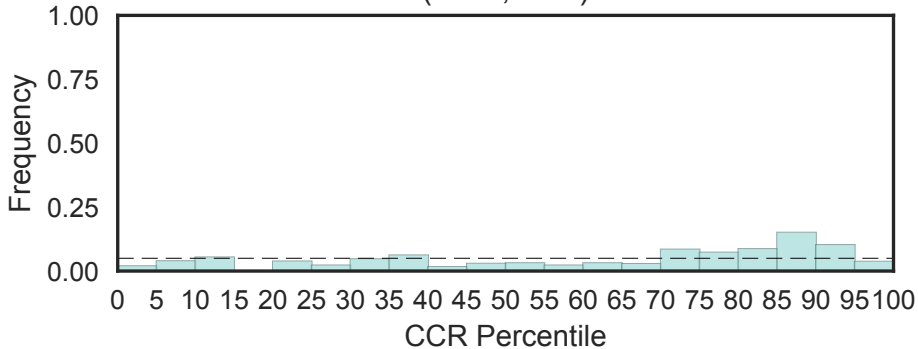

# Granulocyte colony-stimulating factor (GCSF, N=1)

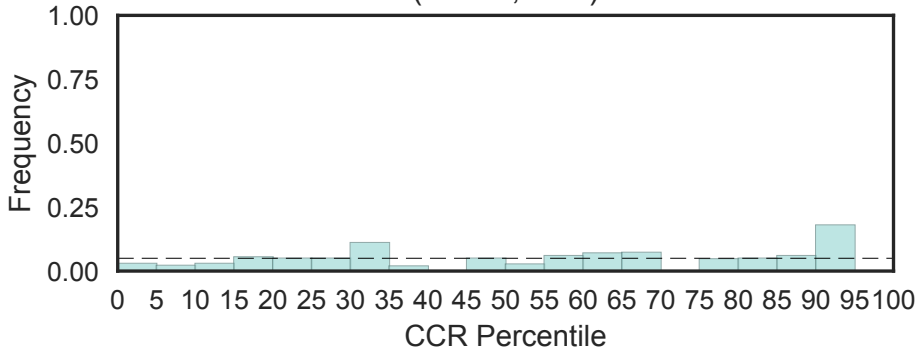



Glycine cleavage H-protein  
(GCV\_H, N=2)

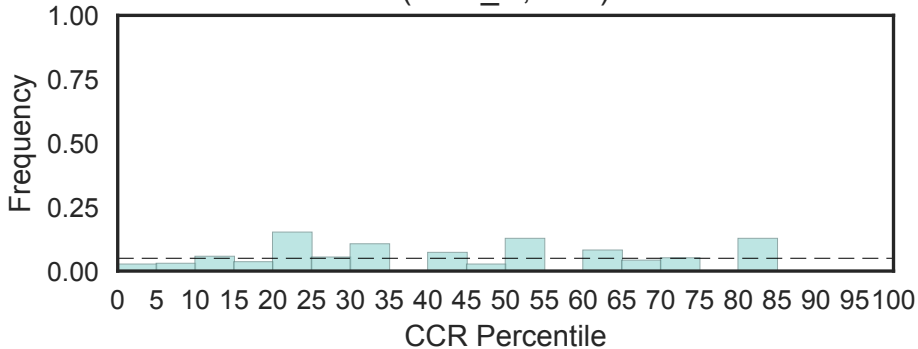

Aminomethyltransferase folate-binding domain  
(GCV\_T, N=5)

Fisher's OR: 0; Bonferroni p-val: 1

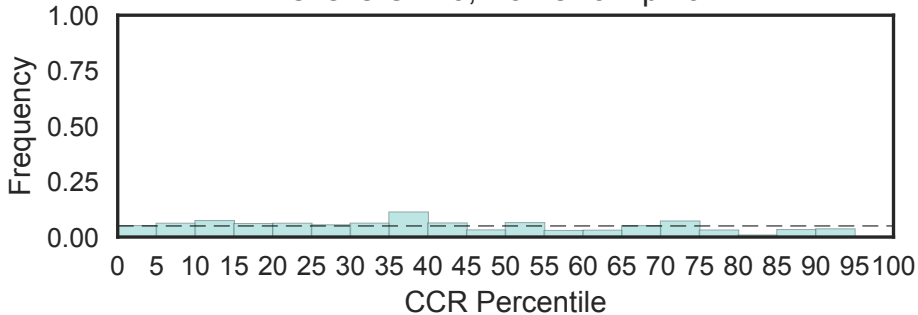

Glycine cleavage T-protein C-terminal barrel domain  
(GCV\_T\_C, N=5)

Fisher's OR: 0.533; Bonferroni p-val: 1

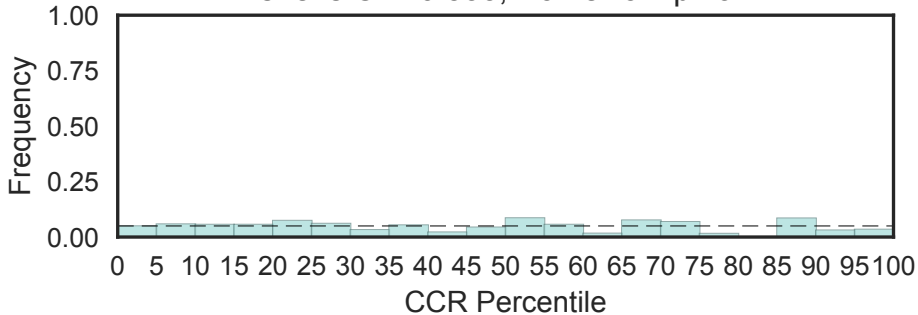

GDA1/CD39 (nucleoside phosphatase) family  
(GDA1\_CD39, N=10)

Fisher's OR: 0.071; Bonferroni p-val: 0.128

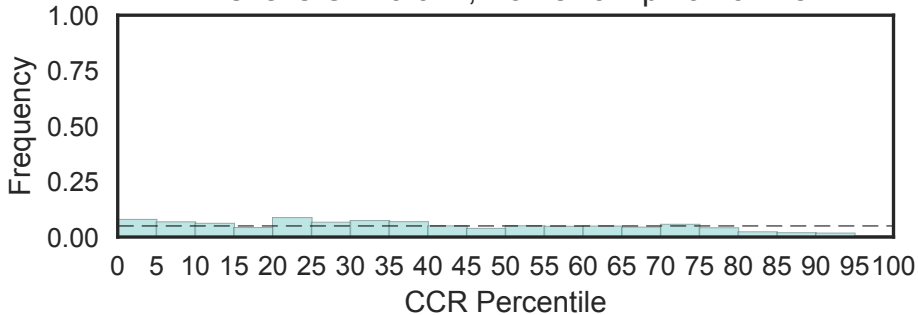

# Glycine cleavage system P-protein (GDC-P, N=2)

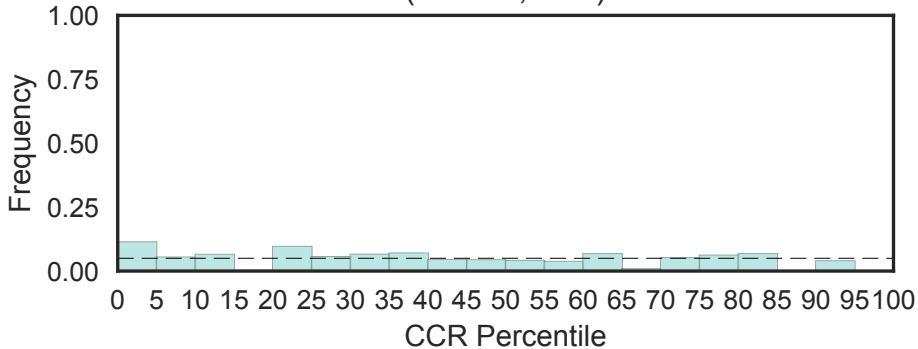

Amylo-alpha-1,6-glucosidase  
(GDE\_C, N=1)

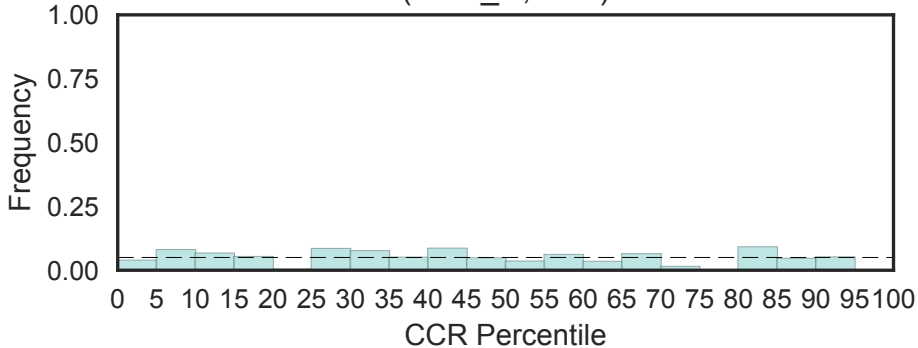

GDP dissociation inhibitor  
(GDI, N=3)

Fisher's OR: 0; Bonferroni p-val: 1

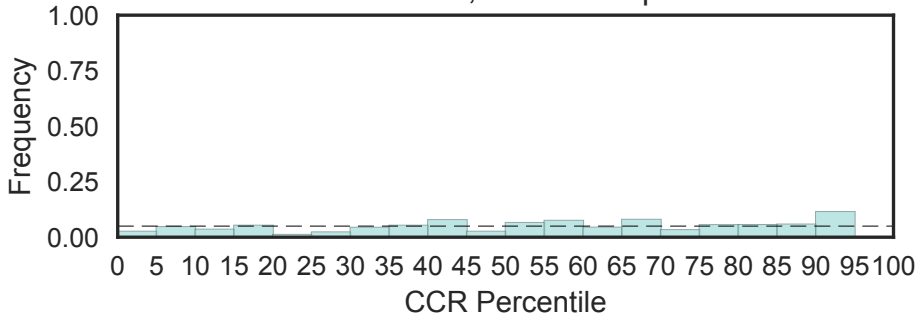

GDNF/GAS1 domain  
(GDNF, N=14)

Fisher's OR: 0.627; Bonferroni p-val: 1

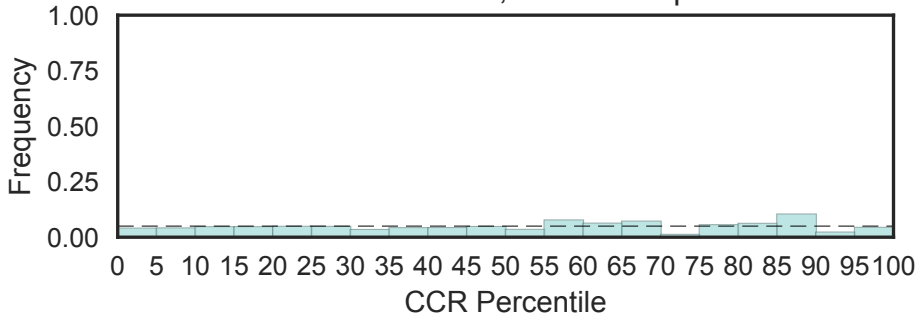



Glycerophosphoryl diester phosphodiesterase family  
(GDPD, N=6)

Fisher's OR: 0.253; Bonferroni p-val: 1

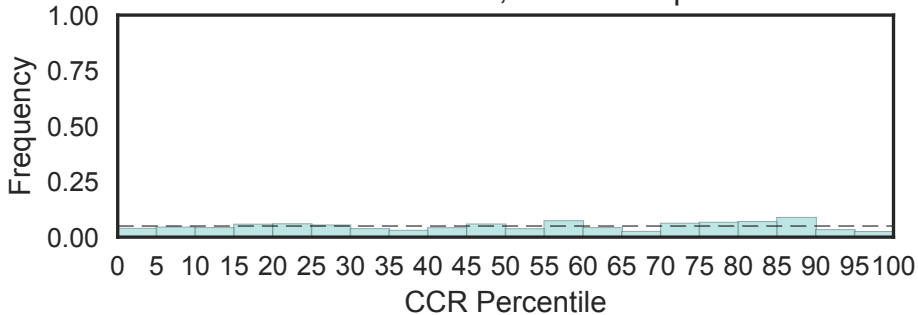

GDP-mannose 4,6 dehydratase  
(GDP\_Man\_Dehyd, N=12)  
Fisher's OR: 0.477; Bonferroni p-val: 1

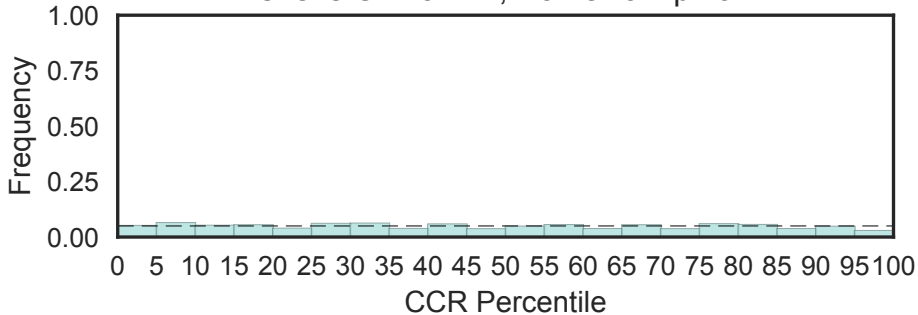

Protein of unknown function with motif GDWWSH  
(GDWWSH, N=1)

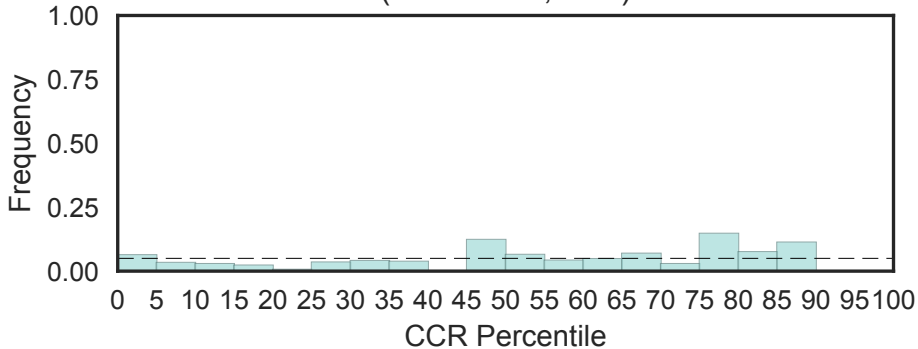

Dynamin GTPase effector domain  
(GED, N=6)

Fisher's OR: 1.87; Bonferroni p-val: 1

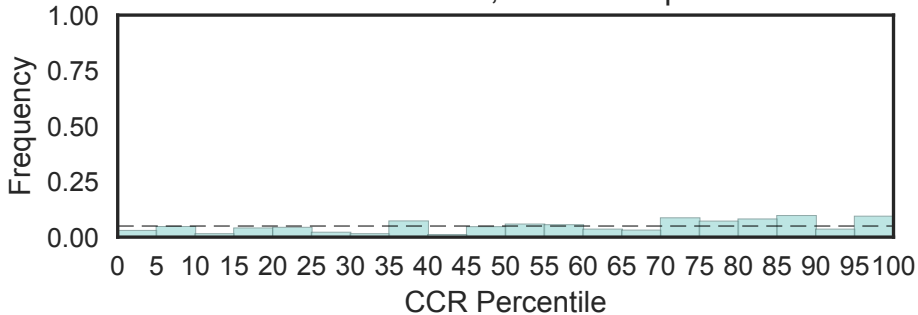

# Glutathione-dependent formaldehyde-activating enzyme (GFA, N=2)

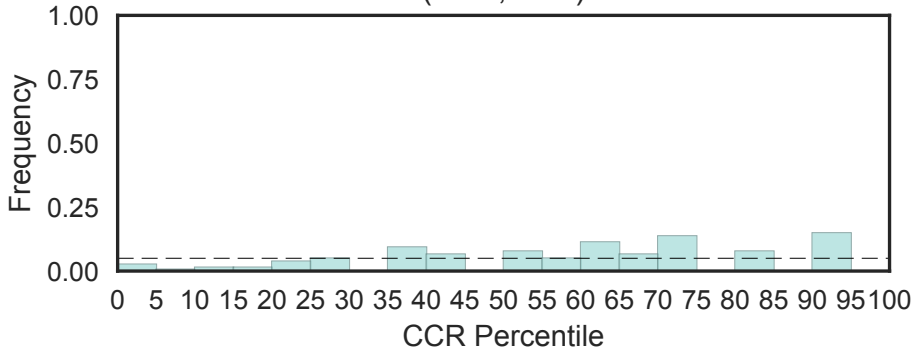

Oxidoreductase family, NAD-binding Rossmann fold  
(GFO\_IDH\_MocA, N=5)

Fisher's OR: 0; Bonferroni p-val: 1

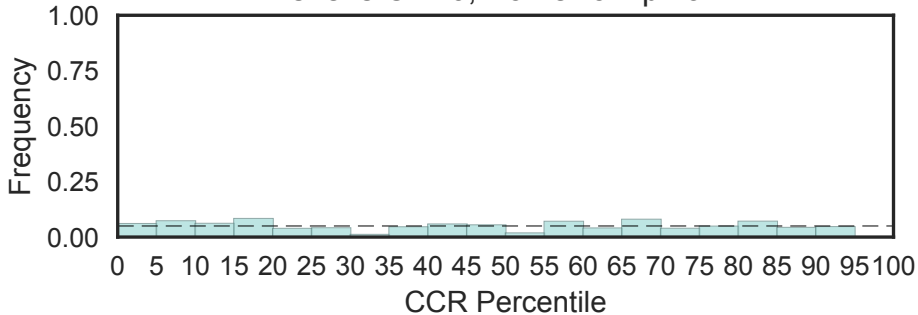

Oxidoreductase family, C-terminal alpha/beta domain  
(GFO\_IDH\_MocA\_C, N=2)

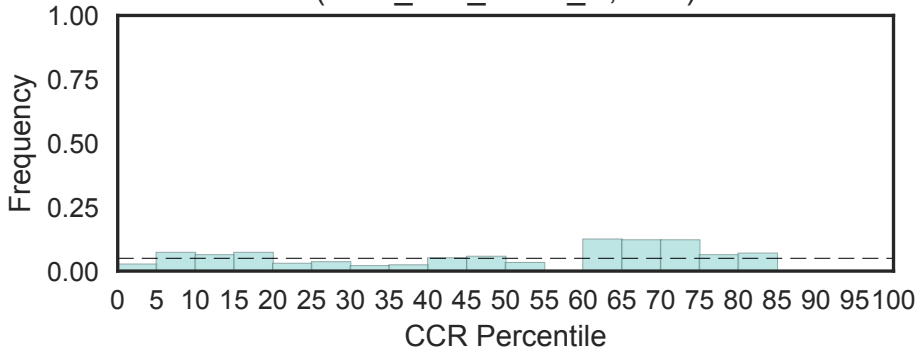

# GTP cyclohydrolase I feedback regulatory protein (GFRP) (GFRP, N=1)

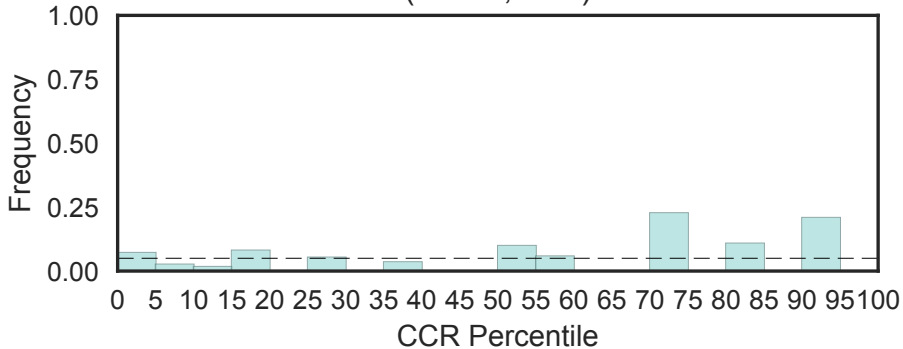



Growth factor receptor domain IV  
(GF\_recep\_IV, N=6)  
Fisher's OR: 0.342; Bonferroni p-val: 1

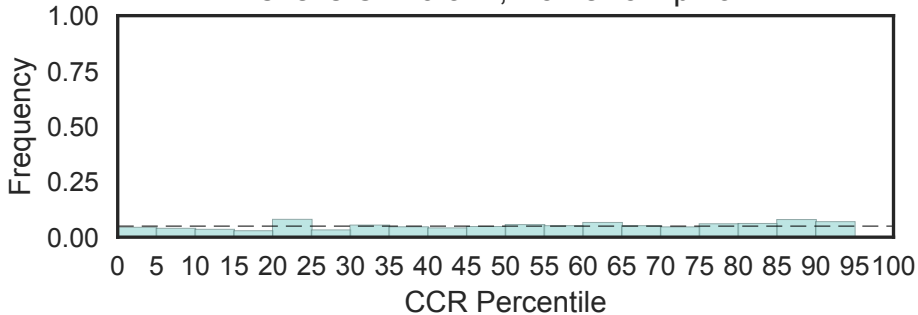

# Gamma-glutamyl cyclotransferase, AIG2-like (GGACT, N=2)

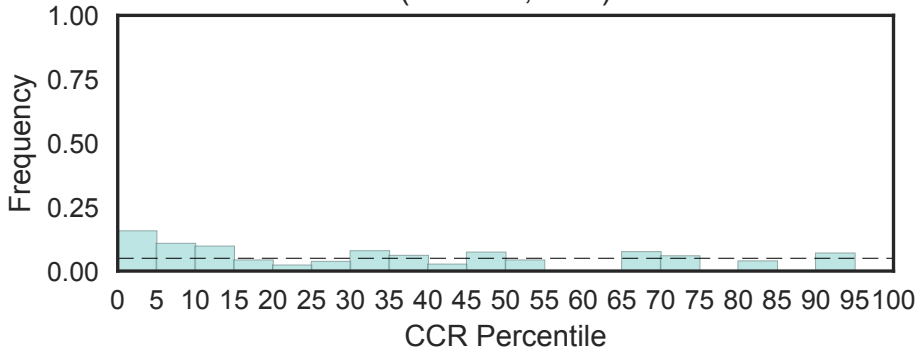

# Gametogenetin (GGN, N=1)

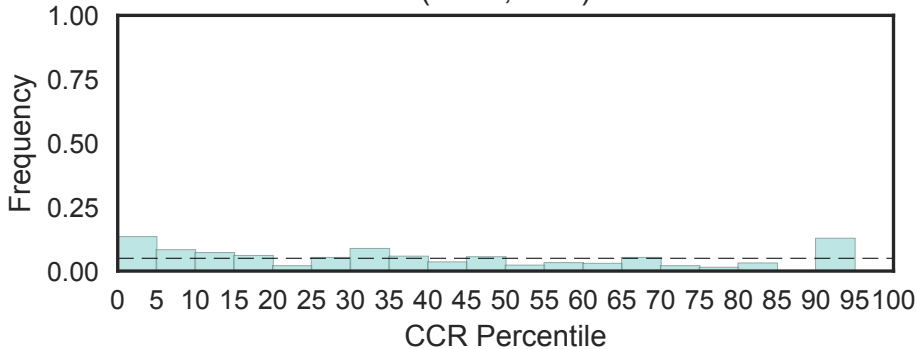

# GH3 auxin-responsive promoter (GH3, N=1)

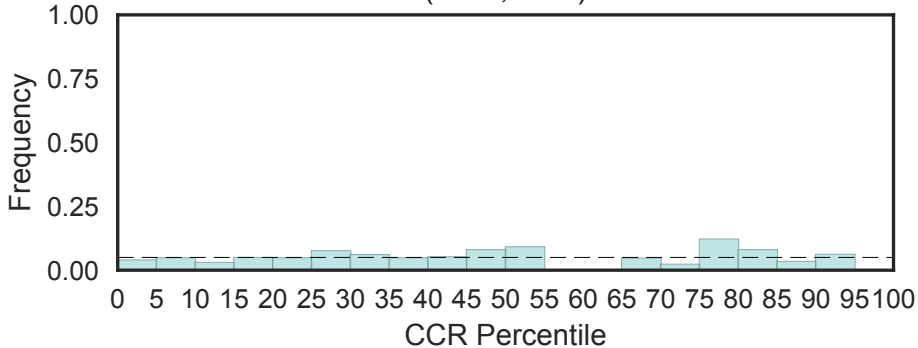

# Growth hormone receptor binding (GHBP, N=1)

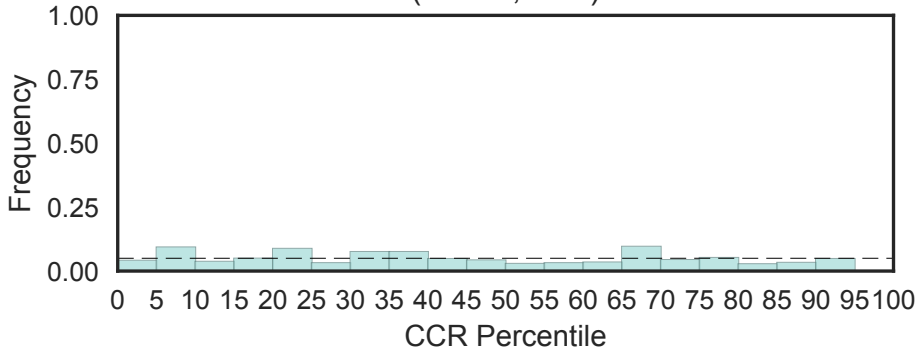

GHMP kinases C terminal  
(GHMP\_kinases\_C, N=4)  
Fisher's OR: 0; Bonferroni p-val: 1

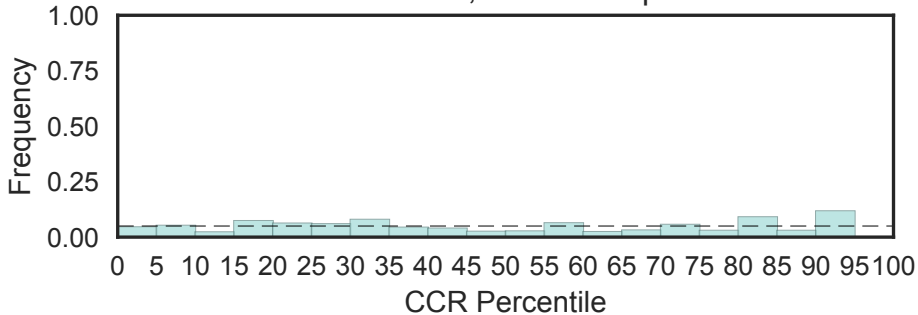

GHMP kinases N terminal domain  
(GHMP\_kinases\_N, N=5)  
Fisher's OR: 0; Bonferroni p-val: 1

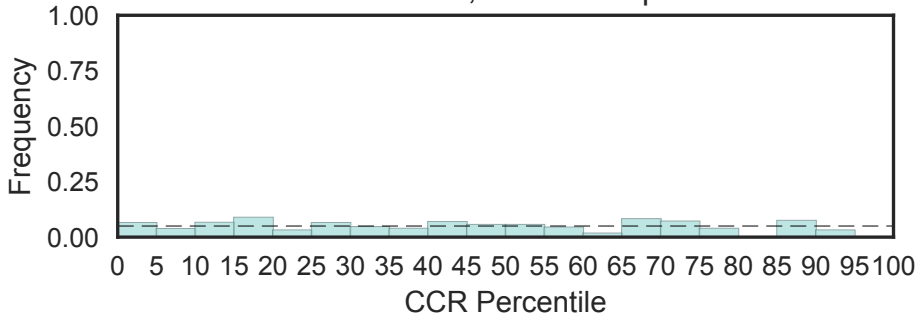

Glucose inhibited division protein A  
(GIDA, N=4)

Fisher's OR: 0.405; Bonferroni p-val: 1

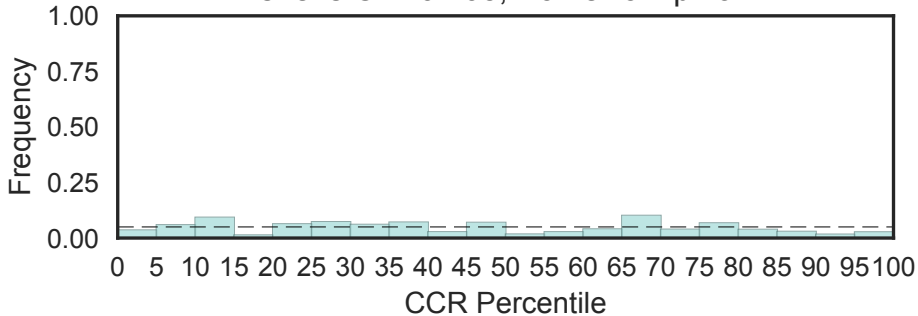



GidA associated domain  
(GIDA\_assoc, N=1)

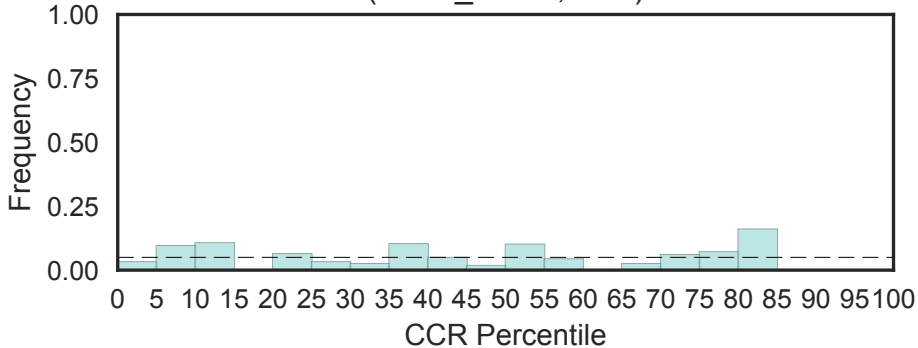

E3 Ubiquitin ligase  
(GIDE, N=1)

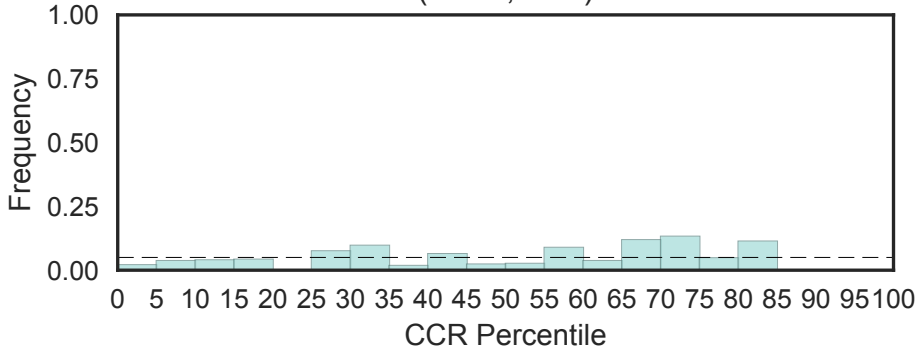

# Gamma interferon inducible lysosomal thiol reductase (GILT) (GILT, N=1)

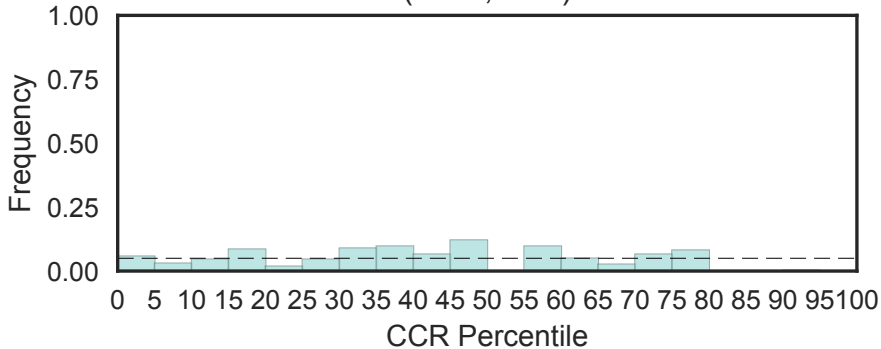

G protein-coupled receptor kinase-interacting protein 1 C term  
(GIT1\_C, N=2)

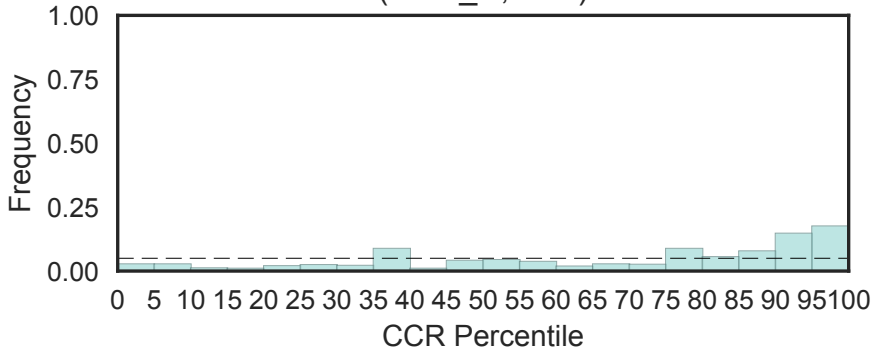

GIT coiled-coil Rho guanine nucleotide exchange factor  
(GIT\_CC, N=2)

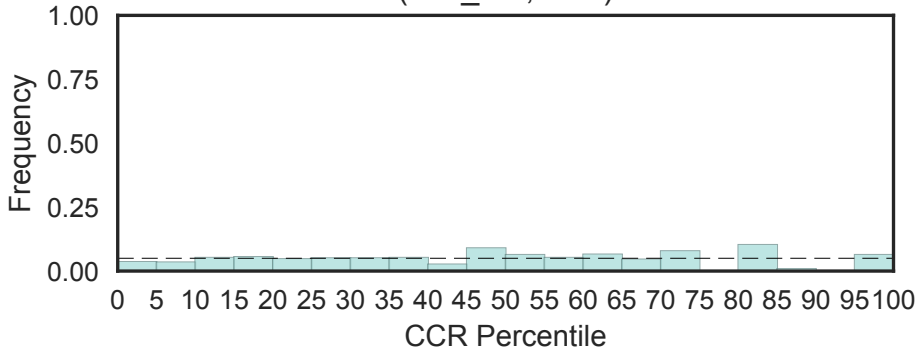

Spa2 homology domain (SHD) of GIT  
(GIT\_SHD, N=4)

Fisher's OR: 2.92; Bonferroni p-val: 1

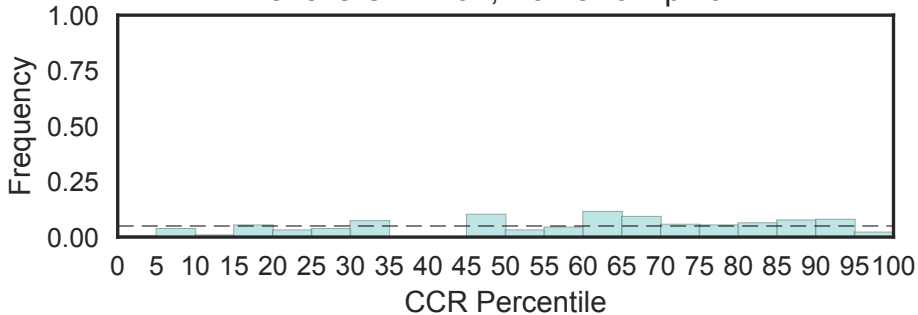

Guanylate-kinase-associated protein (GKAP) protein  
(GKAP, N=5)

Fisher's OR: 1.37; Bonferroni p-val: 1

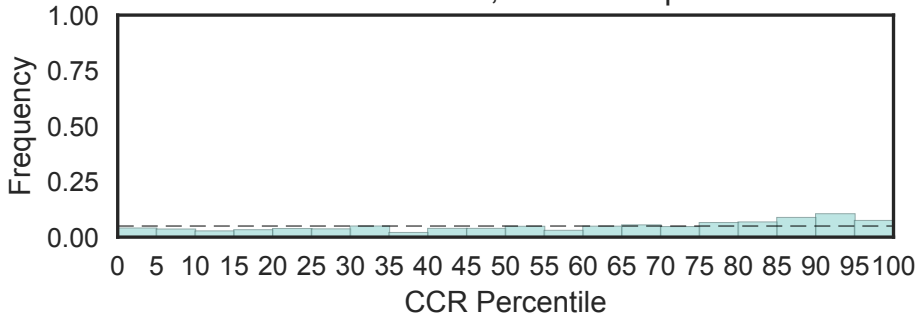

GLE1-like protein  
(GLE1, N=1)

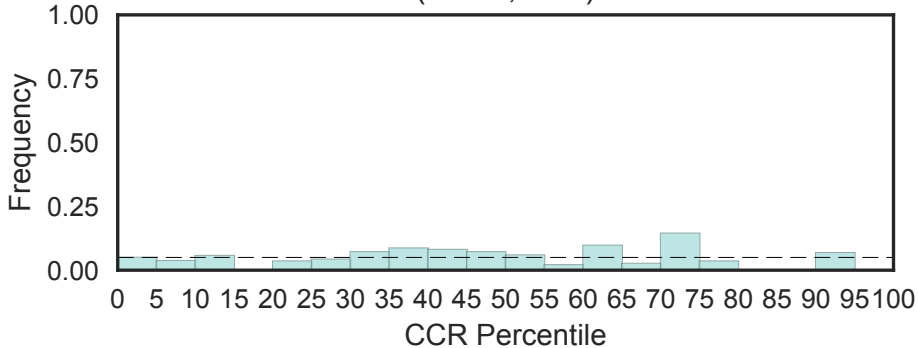



Glycolipid transfer protein (GLTP)  
(GLTP, N=4)

Fisher's OR: 0; Bonferroni p-val: 1

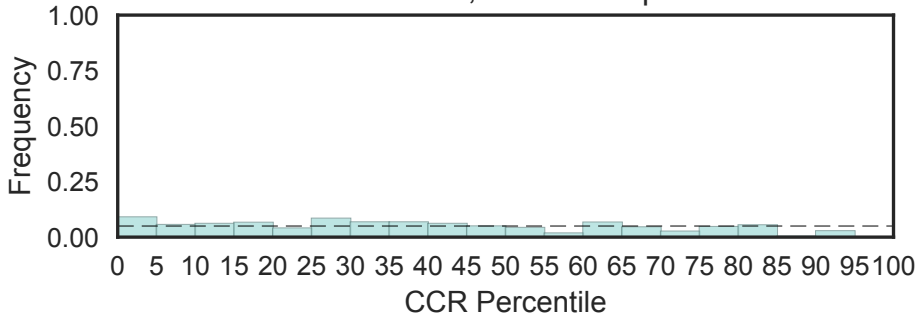

# Conserved region of unknown function on GLTSCR protein (GLTSCR1, N=2)

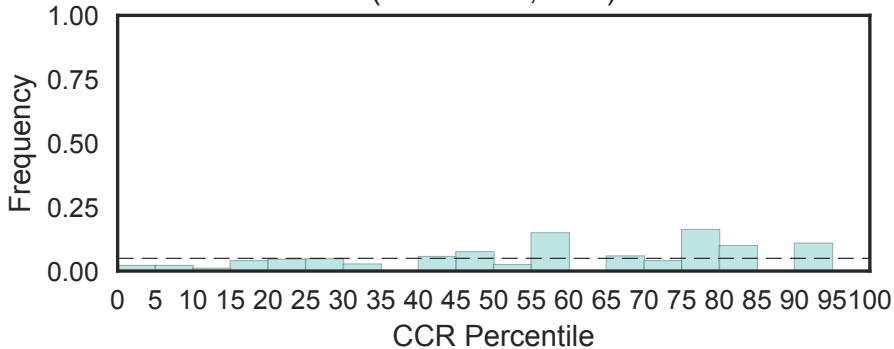

Galanin message associated peptide (GMAP)  
(GMAP, N=1)

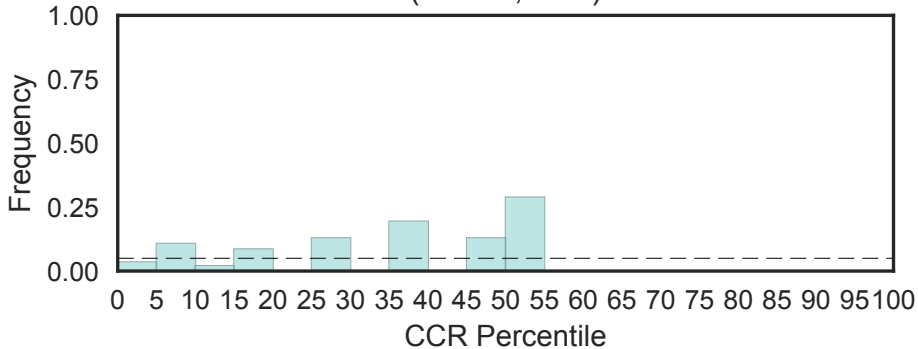

GMC oxidoreductase  
(GMC\_oxred\_C, N=1)

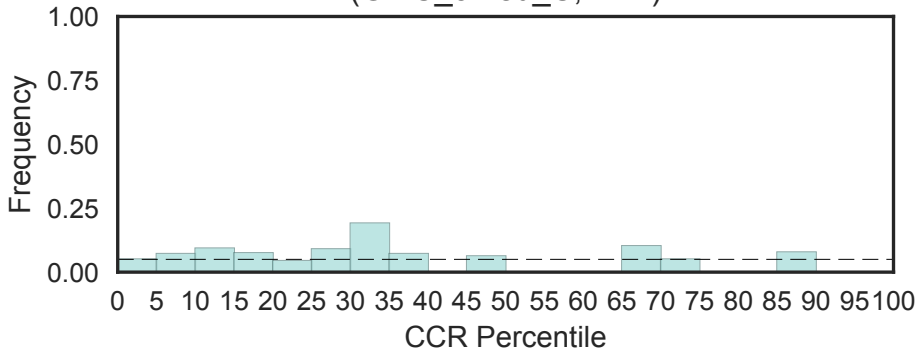

GMC oxidoreductase  
(GMC\_oxred\_N, N=1)

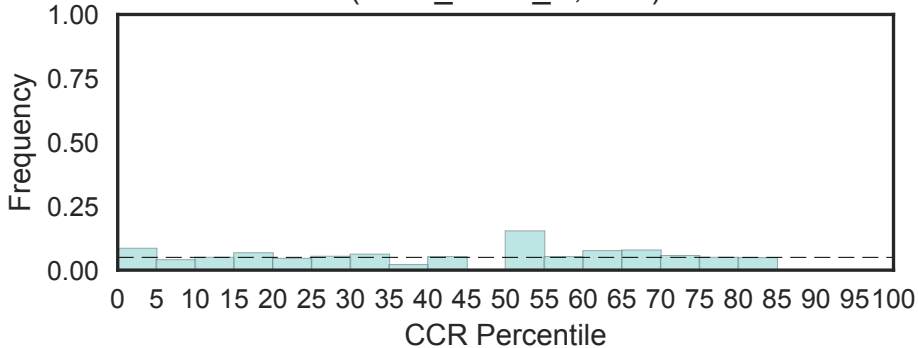

GMP-PDE, delta subunit  
(GMP\_PDE\_delta, N=3)  
Fisher's OR: 0; Bonferroni p-val: 1

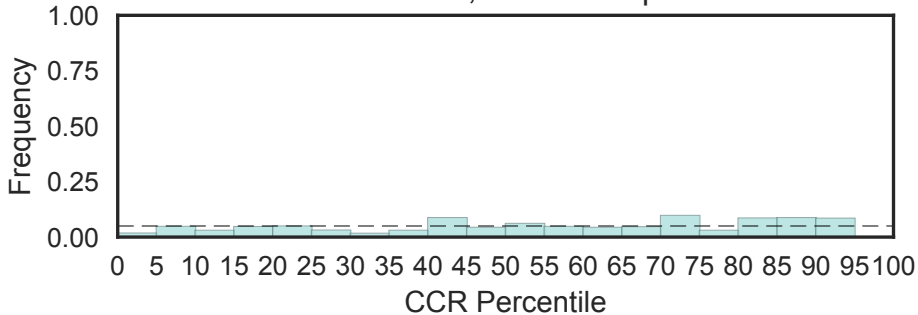

GMP synthase C terminal domain  
(GMP\_synt\_C, N=1)

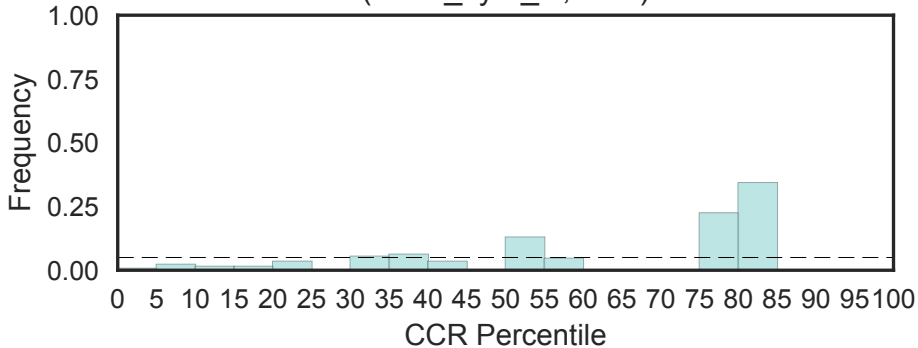

# Granulocyte-macrophage colony-stimulating factor (GM-CSF, N=1)

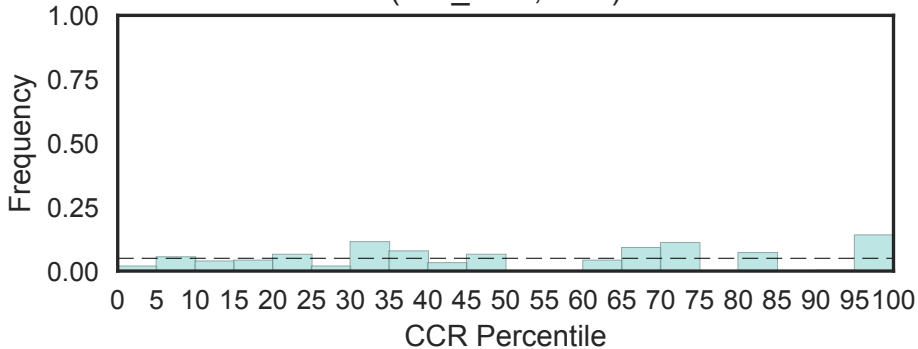



GNL3L/Grn1 putative GTPase  
(GN3L\_Grn1, N=1)

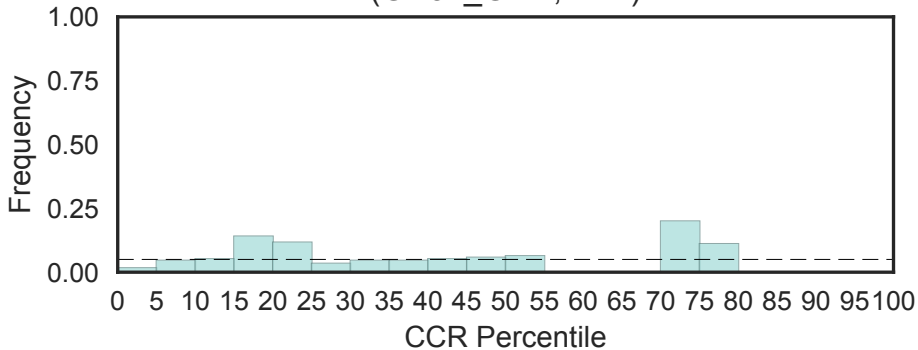

GNAT acetyltransferase 2  
(GNAT\_acetyltr\_2, N=1)

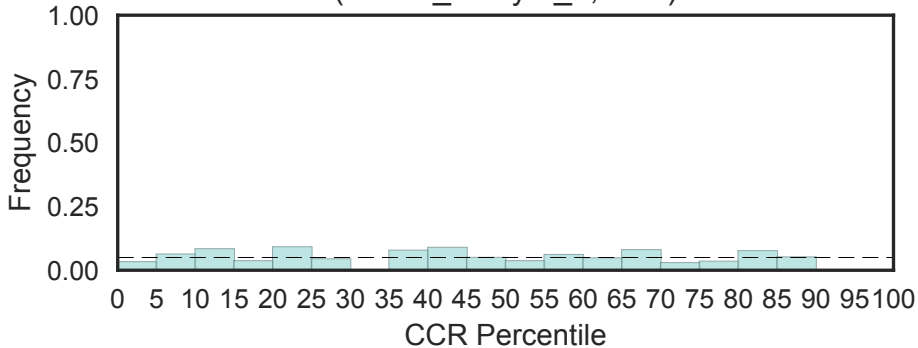

GNT-I family  
(GNT-I, N=2)

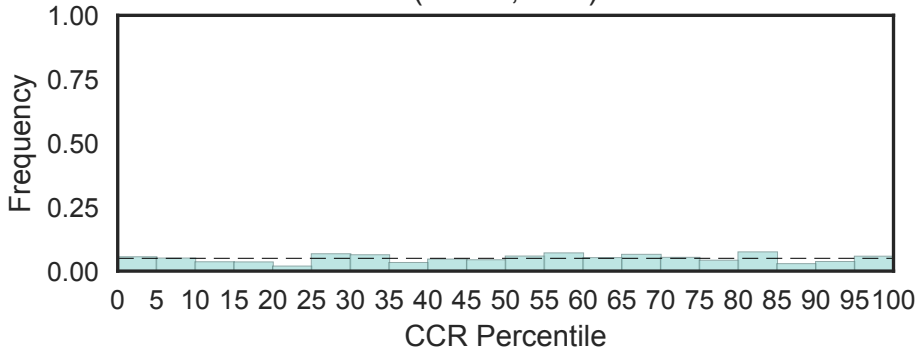

# Golgi-dynamics membrane-trafficking (GOLD\_2, N=2)

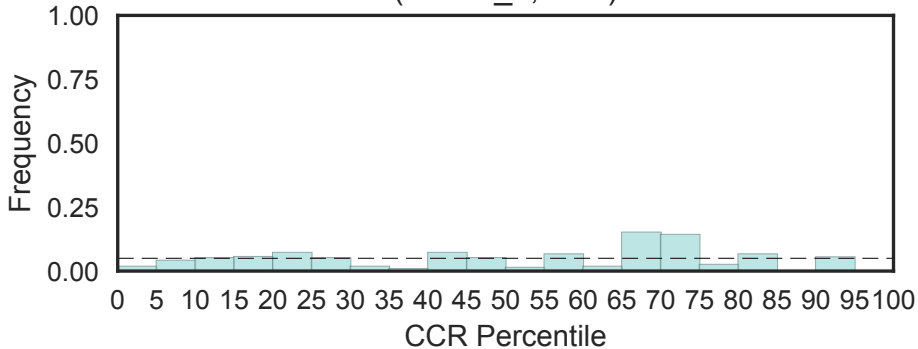

Putative golgin subfamily A member 2-like protein 5  
(GOLGA2L5, N=36)

Fisher's OR: 0.246; Bonferroni p-val: 1

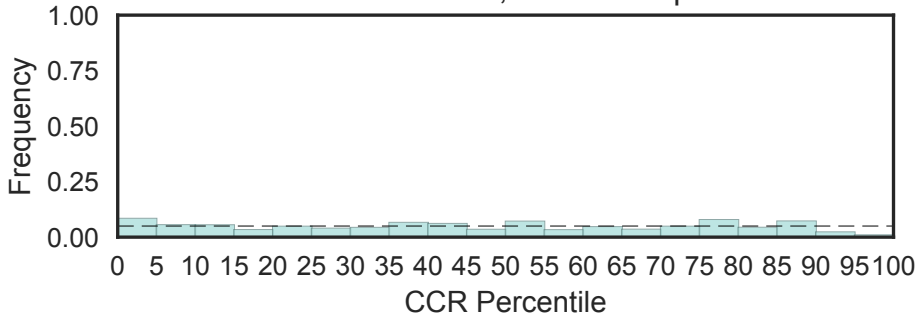

GON domain  
(GON, N=2)

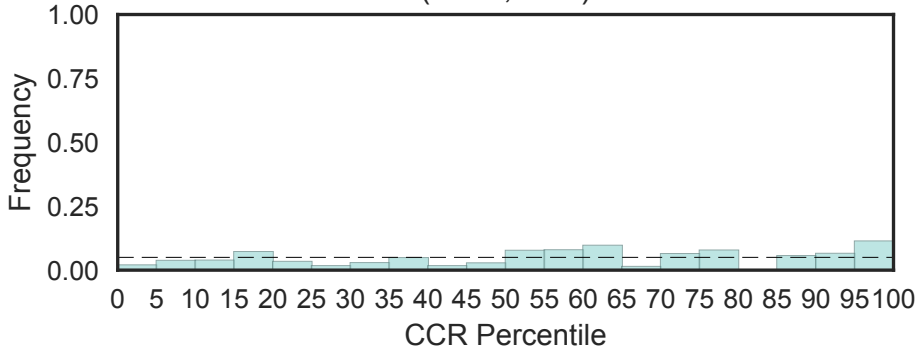

GPCR-chaperone  
(GPCR\_chapero\_1, N=5)  
Fisher's OR: 2.07; Bonferroni p-val: 1

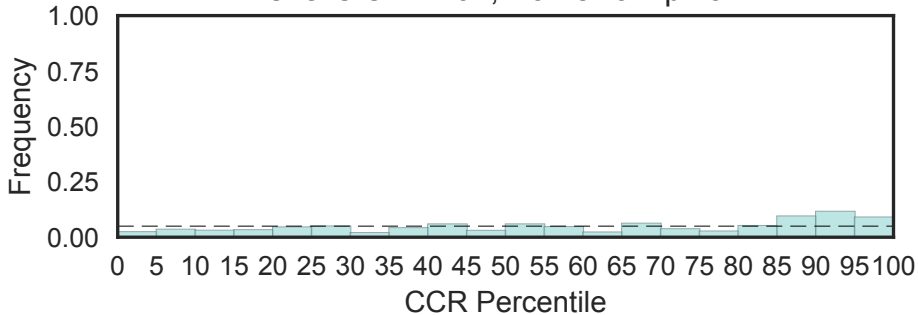

Voltage-dependent L-type calcium channel, IQ-associated  
(GPHH, N=6)

Fisher's OR: 13.1; Bonferroni p-val: 1.92e-05

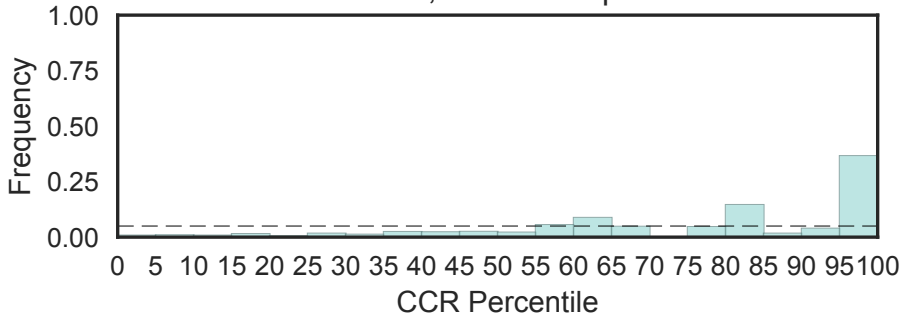



Golgi phosphoprotein 3 (GPP34)  
(GPP34, N=2)

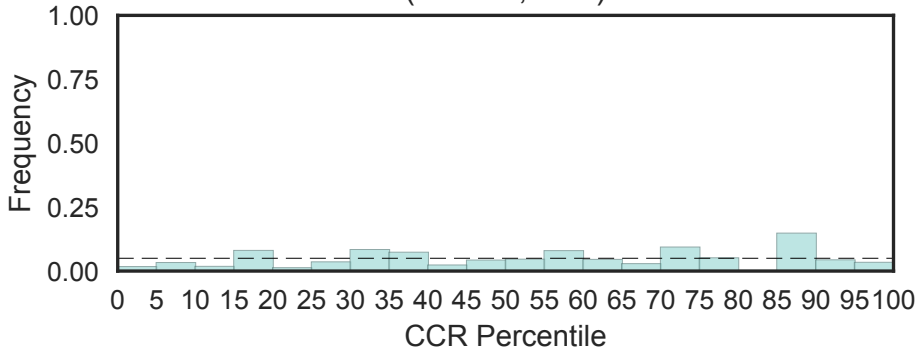

GPCR proteolysis site, GPS, motif  
(GPS, N=28)

Fisher's OR: 0.761; Bonferroni p-val: 1

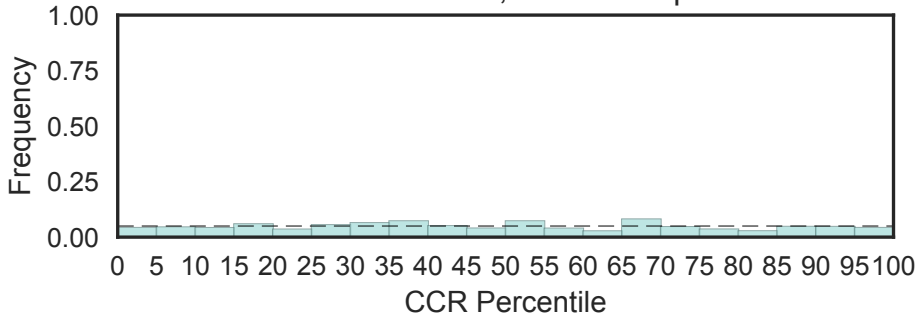

G-protein pathway suppressor 2-interacting domain  
(GPS2\_interact, N=2)

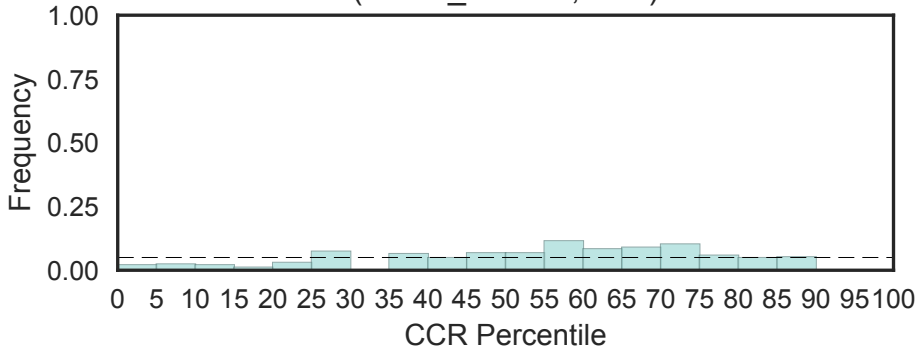

GRAM domain  
(GRAM, N=18)

Fisher's OR: 1.12; Bonferroni p-val: 1

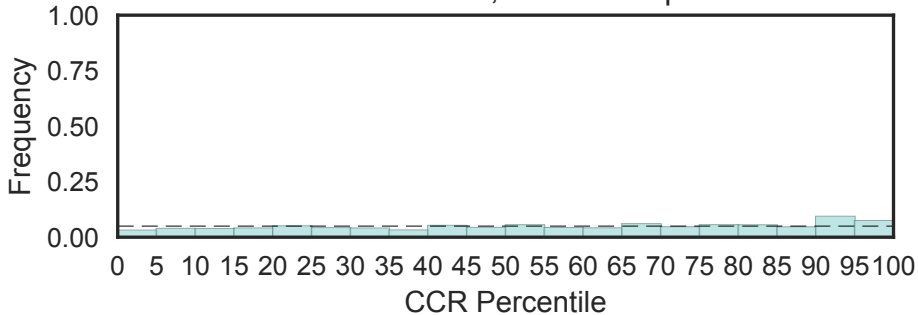

GRASP55/65 PDZ-like domain  
(GRASP55\_65, N=2)

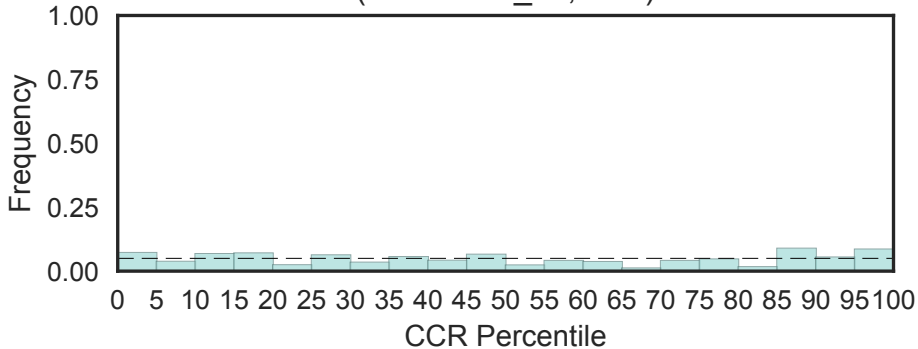

Gene regulated by oestrogen in breast cancer  
(GREB1, N=4)

Fisher's OR: 0.609; Bonferroni p-val: 1

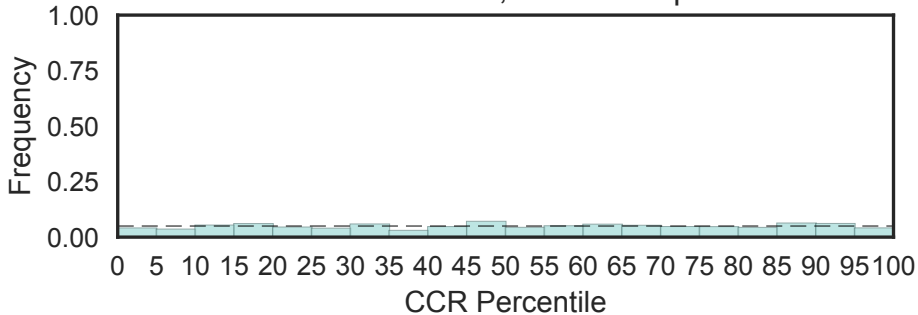

GRIM-19 protein  
(GRIM-19, N=3)

Fisher's OR: 0; Bonferroni p-val: 1

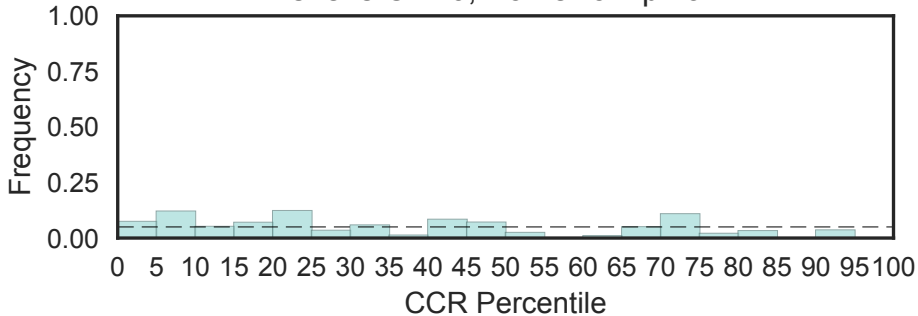

G protein-regulated inducer of neurite outgrowth C-terminus  
(GRIN\_C, N=3)

Fisher's OR: 2.06; Bonferroni p-val: 1

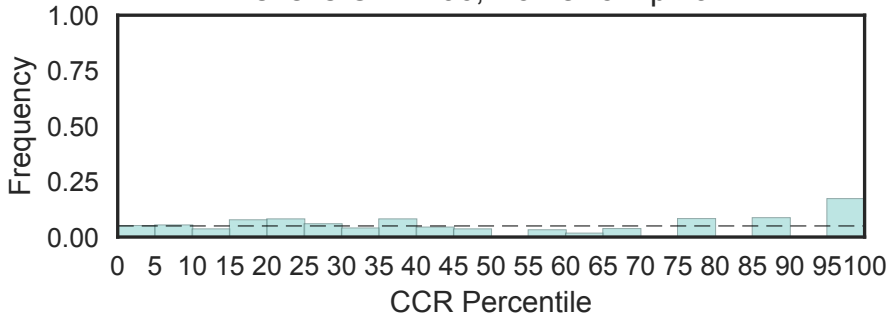



GRIP domain  
(GRIP, N=11)

Fisher's OR: 0; Bonferroni p-val: 1

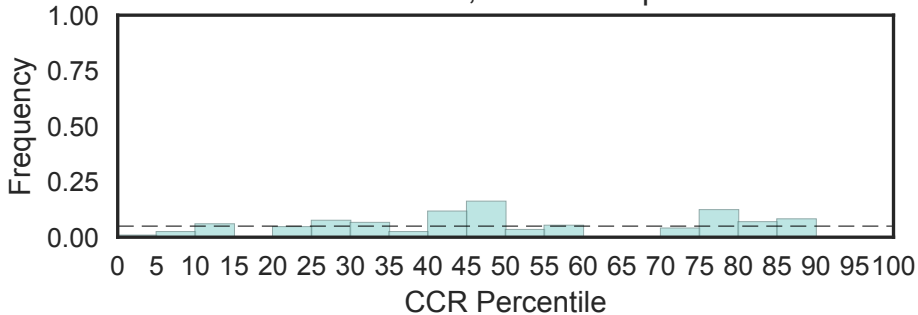

gamma-Secretase-activating protein C-term  
(GSAP-16, N=1)

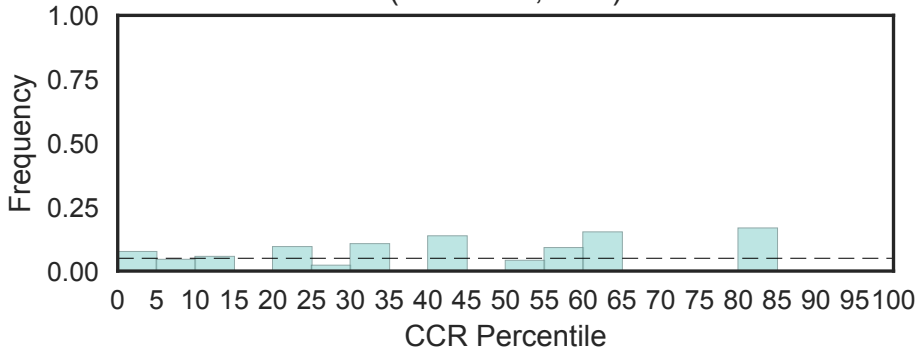

Glucose / Sorbosone dehydrogenase  
(GSDH, N=3)

Fisher's OR: 0.3339; Bonferroni p-val: 1

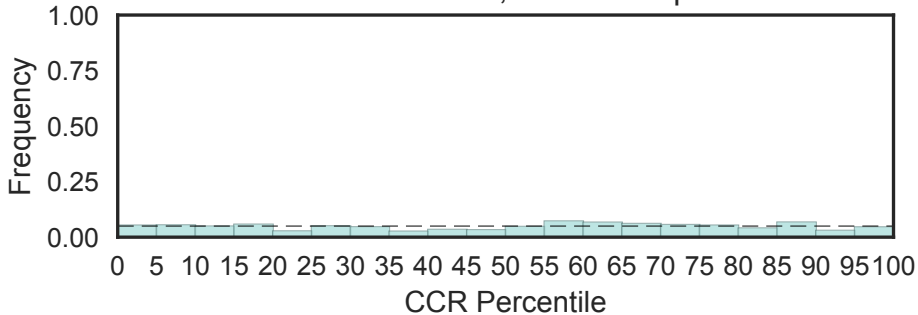

# GSG1-like protein (GSG-1, N=2)

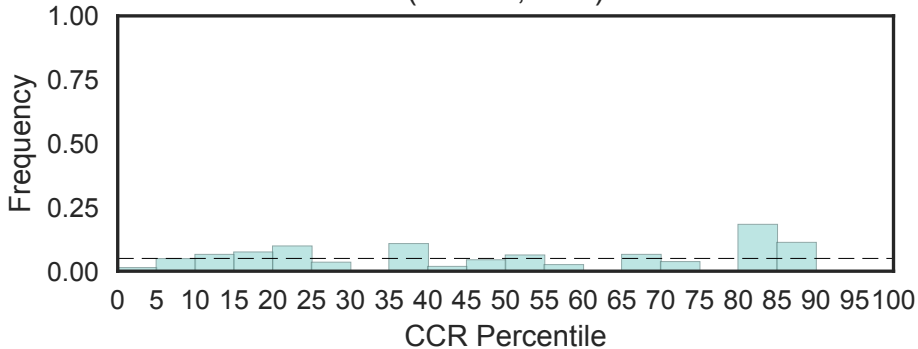

Prokaryotic glutathione synthetase, ATP-grasp domain  
(GSH-S\_ATP, N=2)

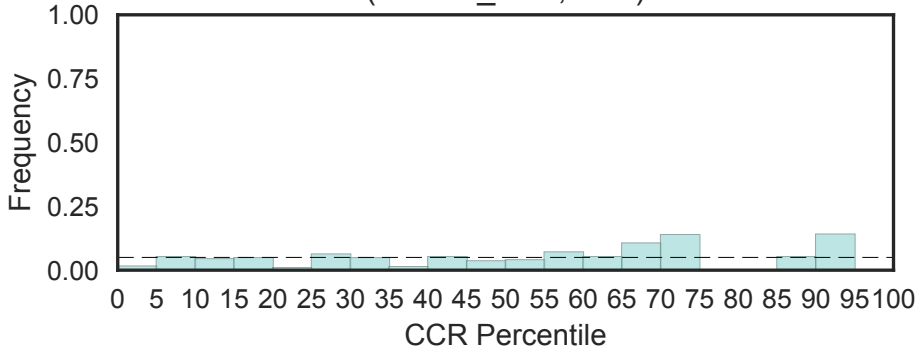

Glutathione peroxidase  
(GSHPx, N=8)

Fisher's OR: 0; Bonferroni p-val: 1

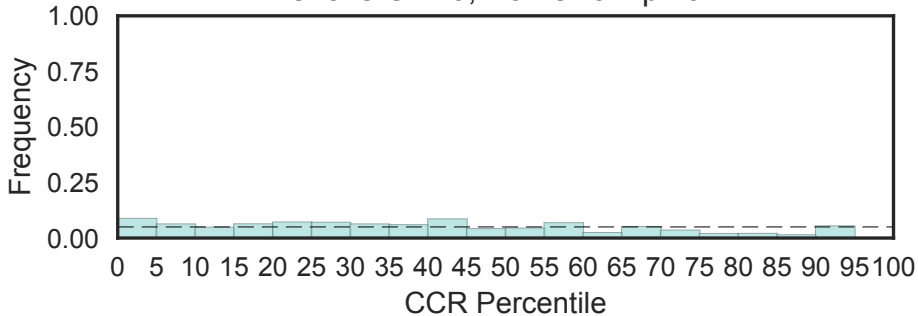

Eukaryotic glutathione synthase, ATP binding domain  
(GSH\_synth\_ATP, N=1)

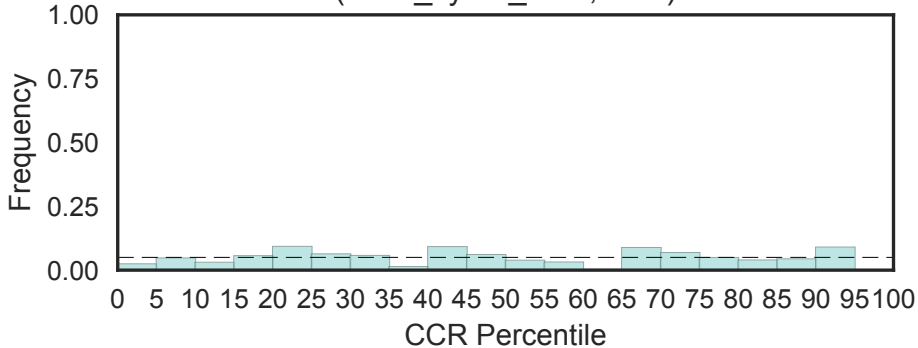

# Eukaryotic glutathione synthase (GSH\_synthase, N=1)

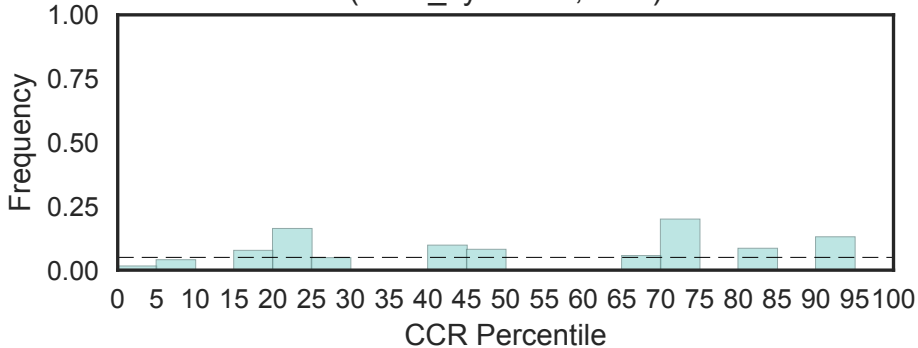



# Glycogen synthase kinase-3 binding (GSK-3\_bind, N=2)

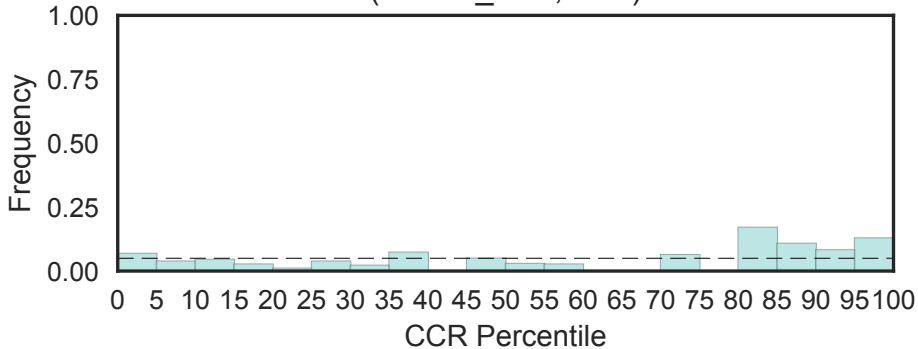

Glutathione S-transferase, C-terminal domain  
(GST\_C, N=24)

Fisher's OR: 0.41; Bonferroni p-val: 1

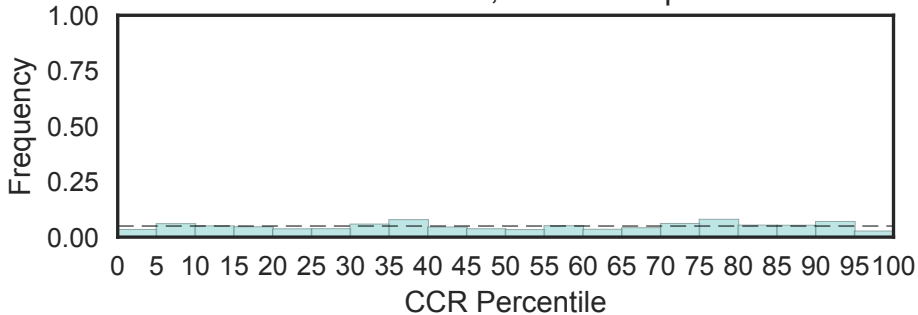

Glutathione S-transferase, C-terminal domain  
(GST\_C\_2, N=14)

Fisher's OR: 0.801; Bonferroni p-val: 1

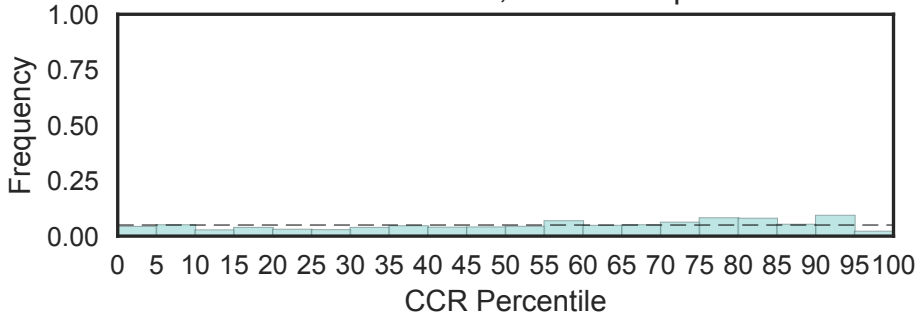

Glutathione S-transferase, C-terminal domain  
(GST\_C\_3, N=17)

Fisher's OR: 0.193; Bonferroni p-val: 1

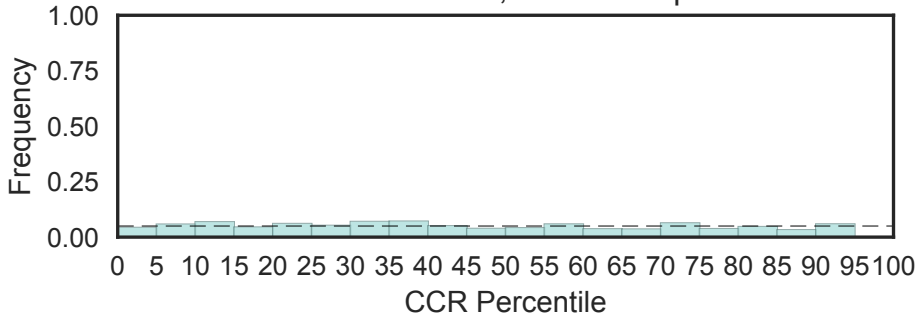

Glutathione S-transferase, C-terminal domain  
(GST\_C\_6, N=4)

Fisher's OR: 1.93; Bonferroni p-val: 1

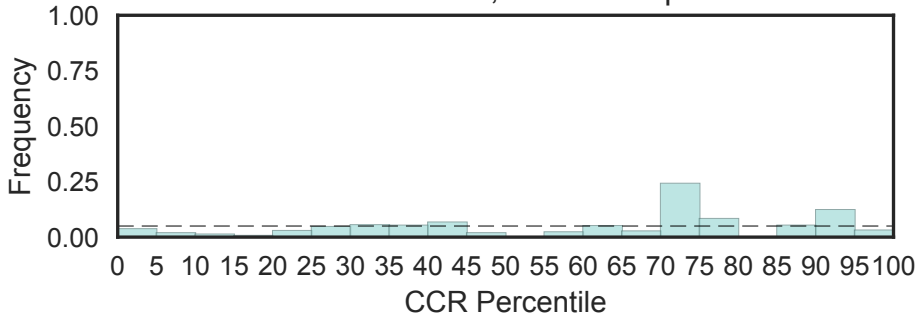

Glutathione S-transferase, N-terminal domain  
(GST\_N, N=22)

Fisher's OR: 0.621; Bonferroni p-val: 1

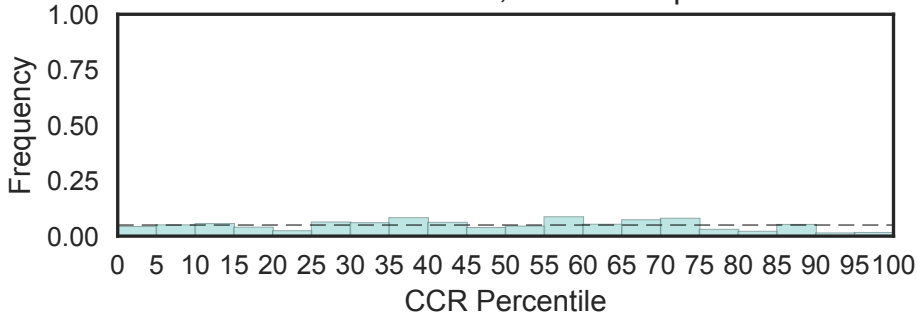

Glutathione S-transferase, N-terminal domain  
(GST\_N\_2, N=10)

Fisher's OR: 0.651; Bonferroni p-val: 1

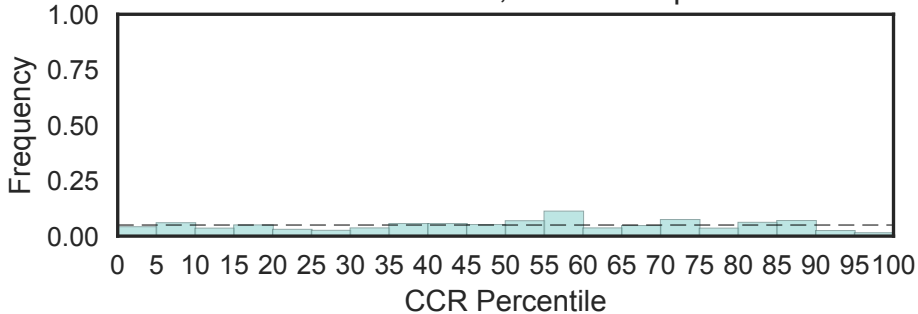

Glutathione S-transferase, N-terminal domain  
(GST\_N\_3, N=14)

Fisher's OR: 0.746; Bonferroni p-val: 1

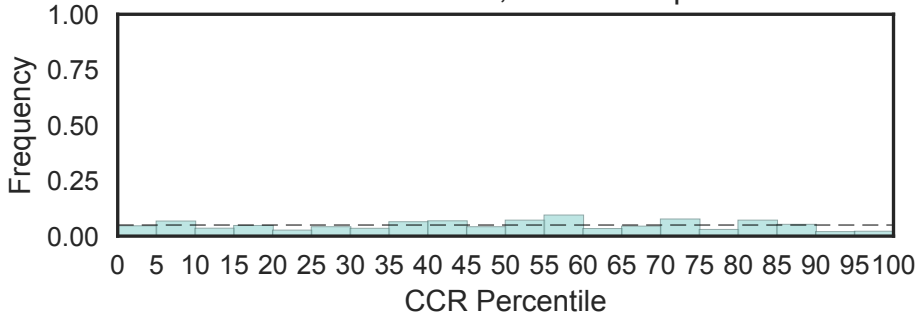



Glutathione S-transferase N-terminal domain  
(GST\_N\_4, N=4)

Fisher's OR: 2.43; Bonferroni p-val: 1

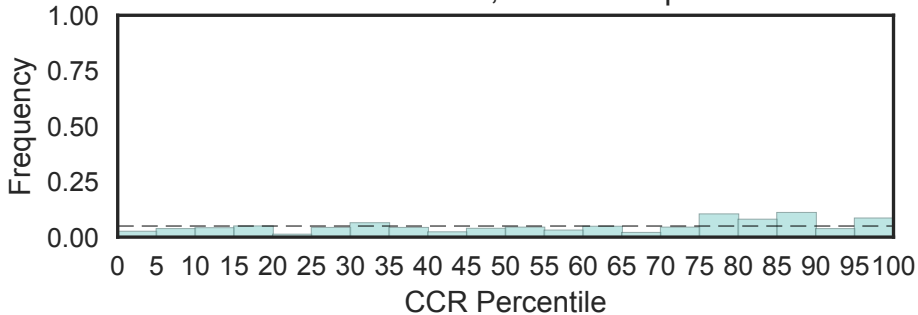

GTF2I-like repeat  
(GTF2I, N=15)

Fisher's OR: 7.05; Bonferroni p-val: 1

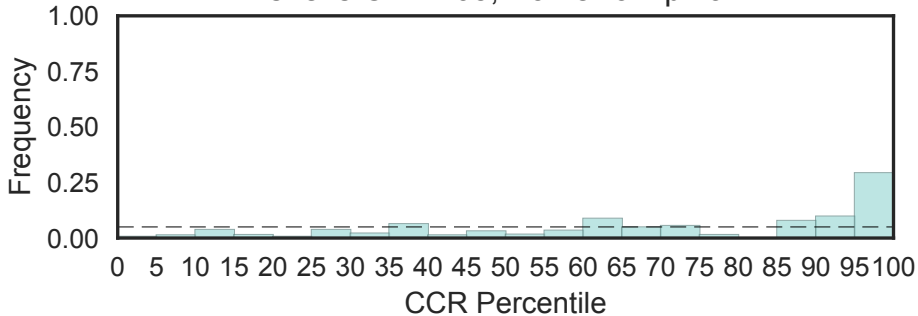

GTP1/OBG  
(GTP1\_OBG, N=2)

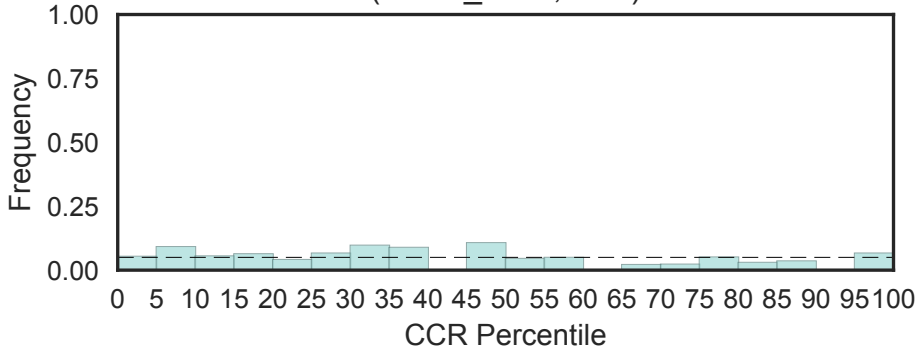

Elongation factor Tu GTP binding domain  
(GTP\_EFTU, N=22)

Fisher's OR: 3.74; Bonferroni p-val: 1.76e-06

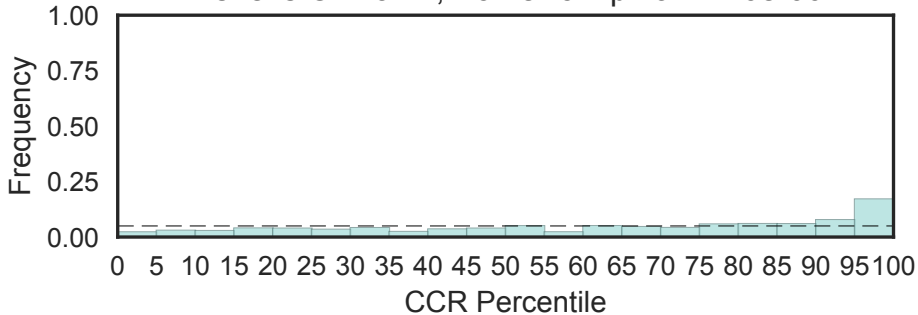

Elongation factor Tu domain 2  
(GTP\_EFTU\_D2, N=11)  
Fisher's OR: 2.94; Bonferroni p-val: 1

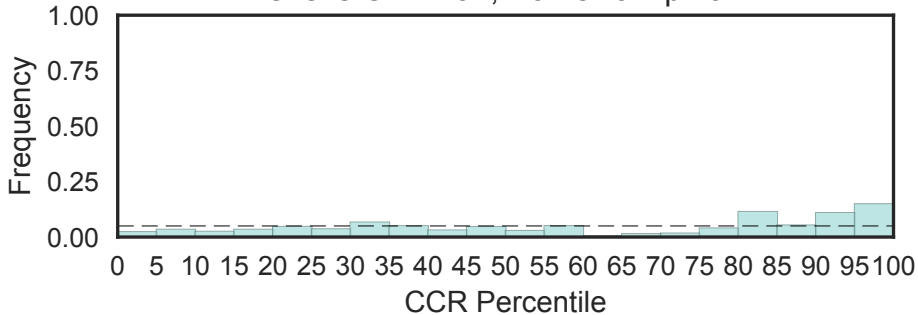

Elongation factor Tu C-terminal domain  
(GTP\_EFTU\_D3, N=6)

Fisher's OR: 6.7; Bonferroni p-val: 0.793

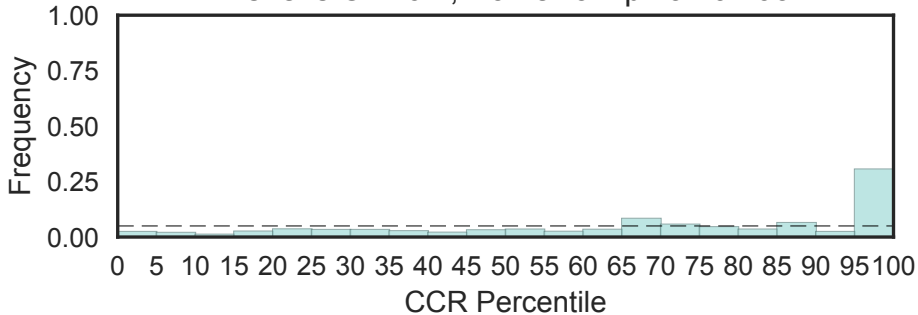

GTP cyclohydrolase I  
(GTP\_cyclohydrol, N=1)

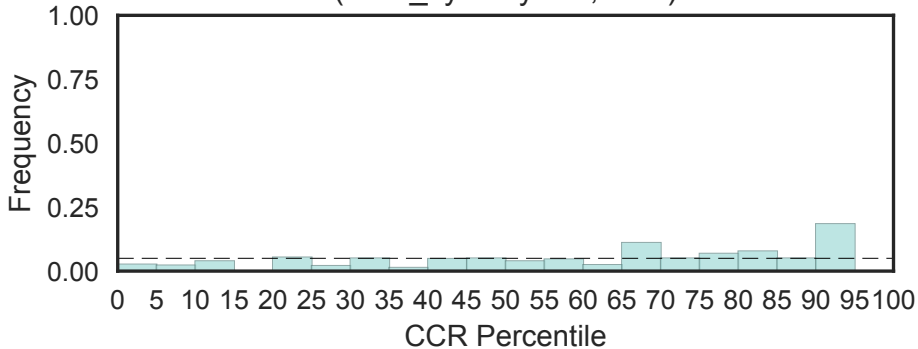

GTPase binding  
(GTPase\_binding, N=1)

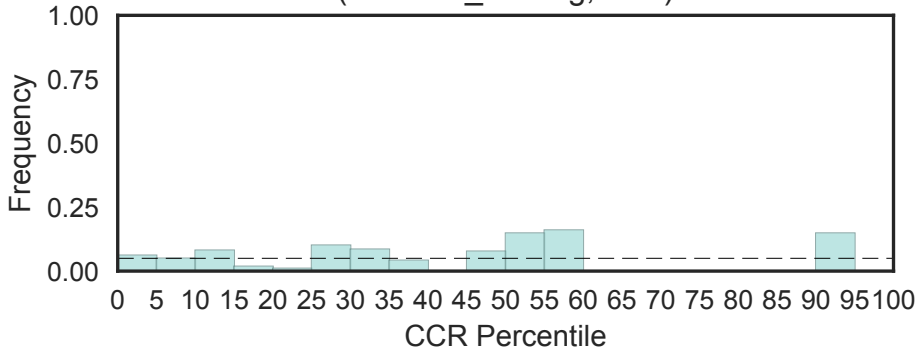



G-2 and S-phase expressed 1  
(GTSE1\_N, N=2)

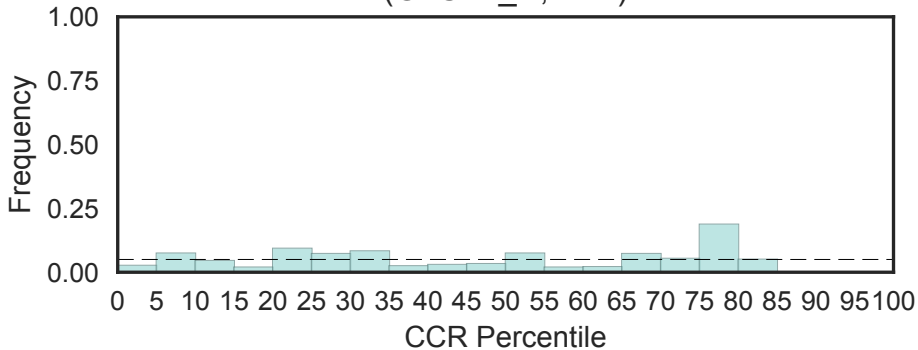

GUCT (NUC152) domain  
(GUCT, N=2)

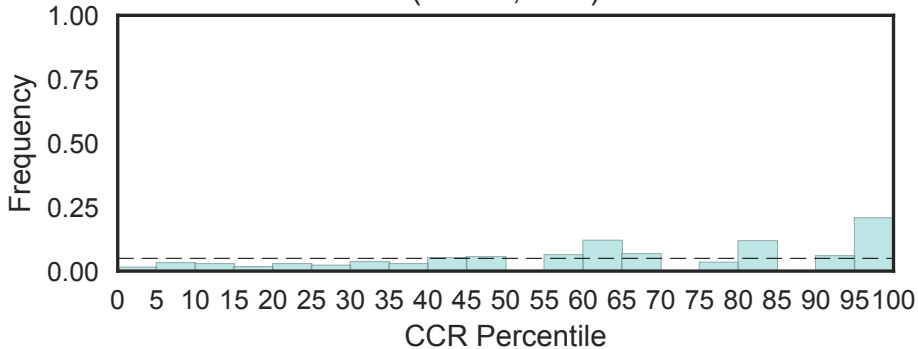

# GWT1 (GWT1, N=1)

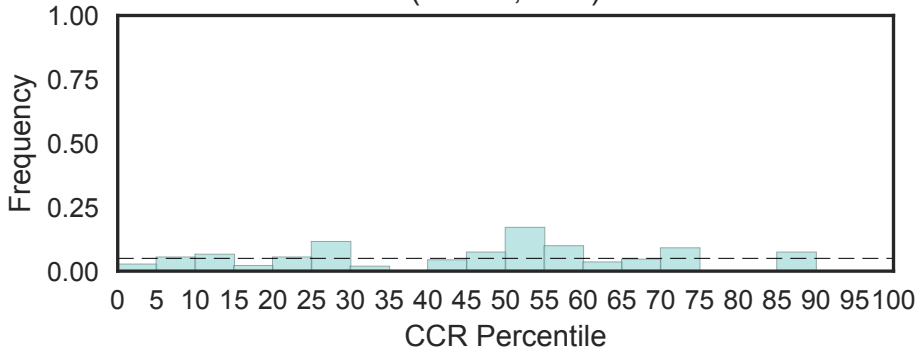

GYF domain  
(GYF, N=3)

Fisher's OR: 0; Bonferroni p-val: 1

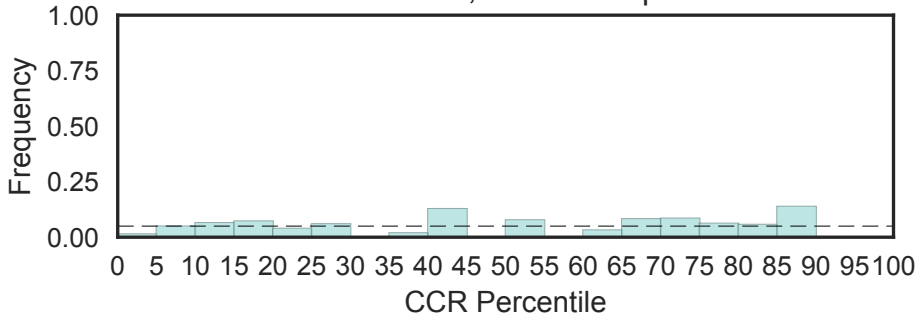

Gamma-glutamyltranspeptidase  
(G\_glu\_transpept, N=9)  
Fisher's OR: 0.257; Bonferroni p-val: 1

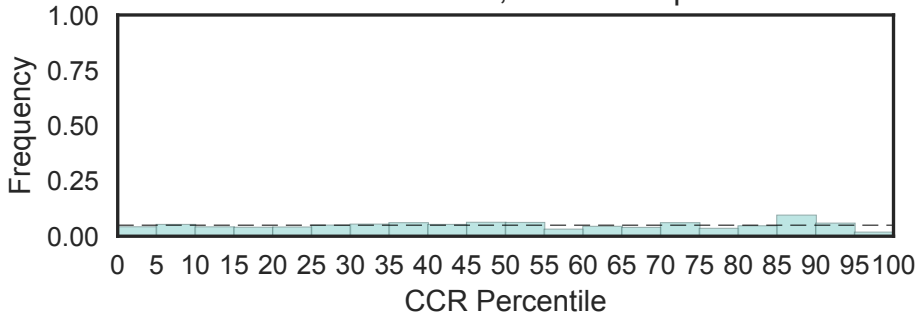

G-protein pathway suppressor  
(G\_path\_suppress, N=1)

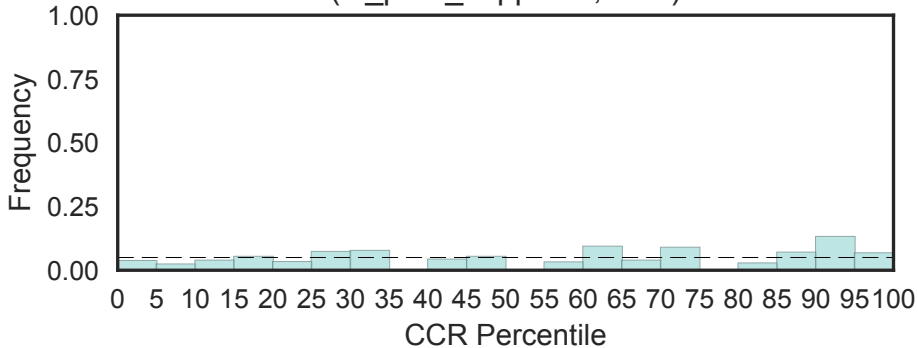

Gaa1-like, GPI transamidase component  
(Gaa1, N=1)

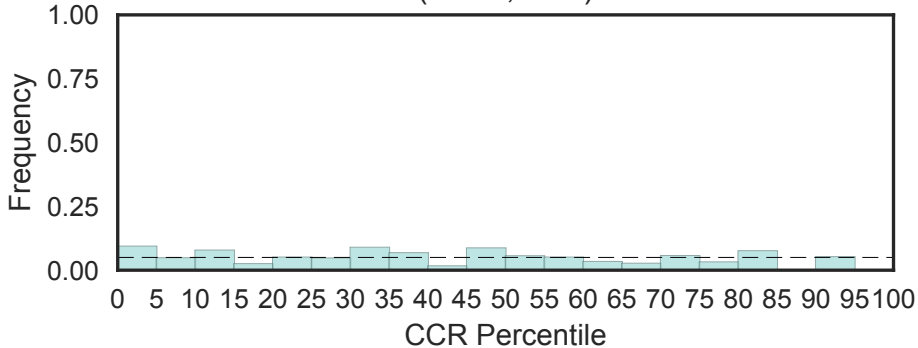

Matrix protein (MA), p15  
(Gag\_MA, N=1)

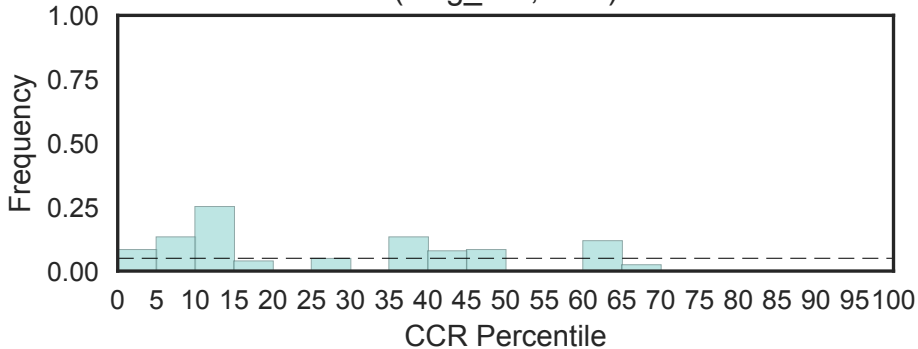



Galactose-3-O-sulfotransferase  
(Gal-3-0\_sulfotr, N=8)

Fisher's OR: 0.291; Bonferroni p-val: 1

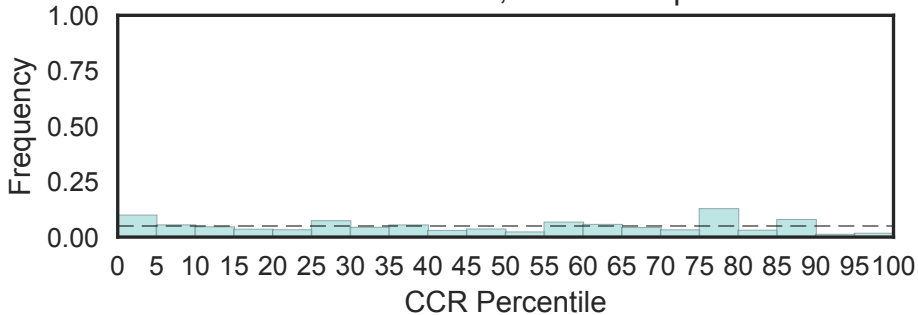

Galactoside-binding lectin  
(Gal-bind\_lectin, N=22)  
Fisher's OR: 0; Bonferroni p-val: 1

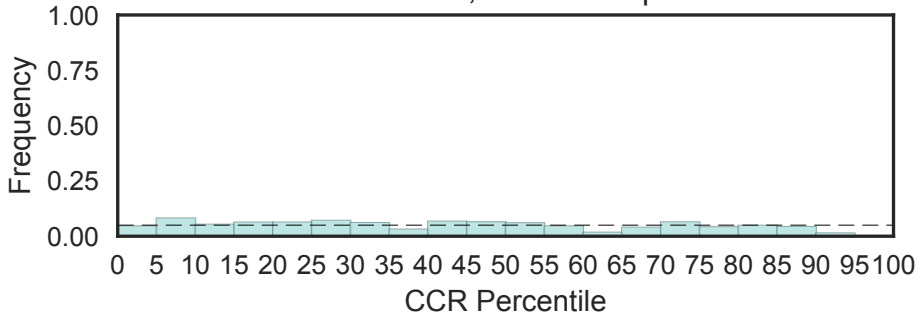

Galactokinase galactose-binding signature  
(GalKase\_gal\_bdg, N=2)

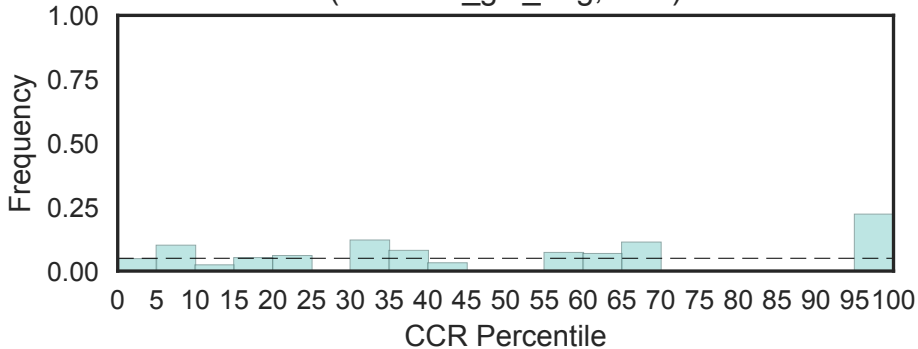

Galactose-1-phosphate uridyl transferase, C-terminal domain  
(GalP\_UDP\_tr\_C, N=1)

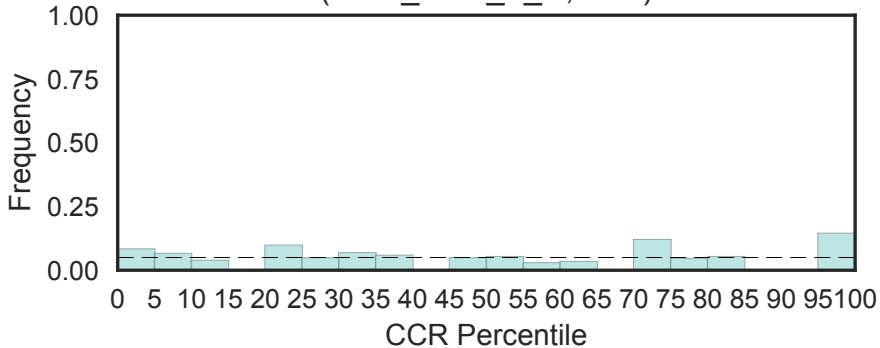

Galactose-1-phosphate uridyl transferase, N-terminal domain  
(GalP\_UDP\_transf, N=1)

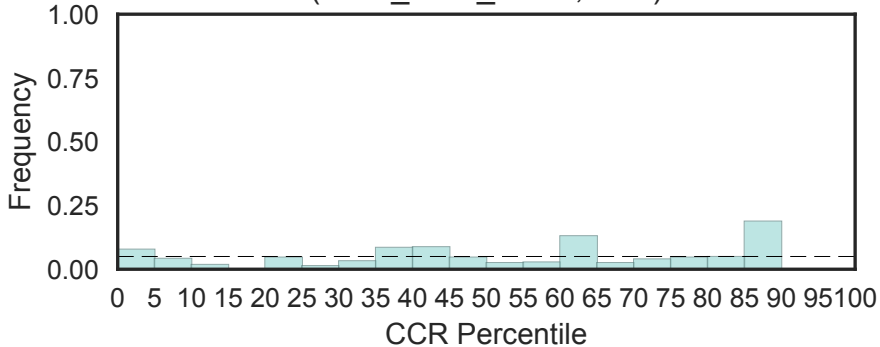

Galactose binding lectin domain  
(Gal\_Lectin, N=6)  
Fisher's OR: 2.13; Bonferroni p-val: 1

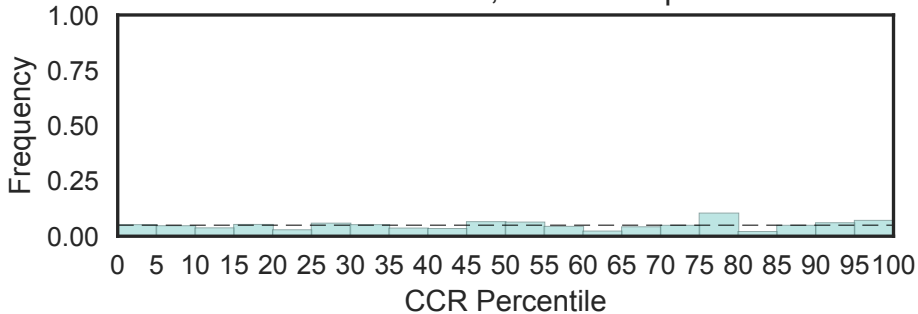

Galactose mutarotase-like  
(Gal\_mutarotas\_2, N=4)  
Fisher's OR: 0; Bonferroni p-val: 1

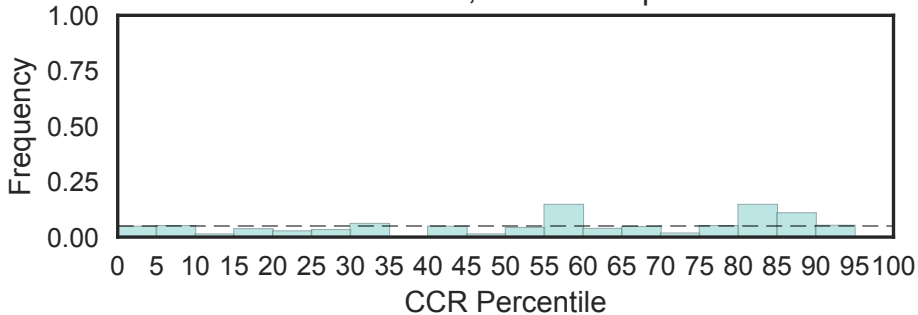

Galactosyltransferase  
(Galactosyl\_T, N=16)

Fisher's OR: 0.832; Bonferroni p-val: 1

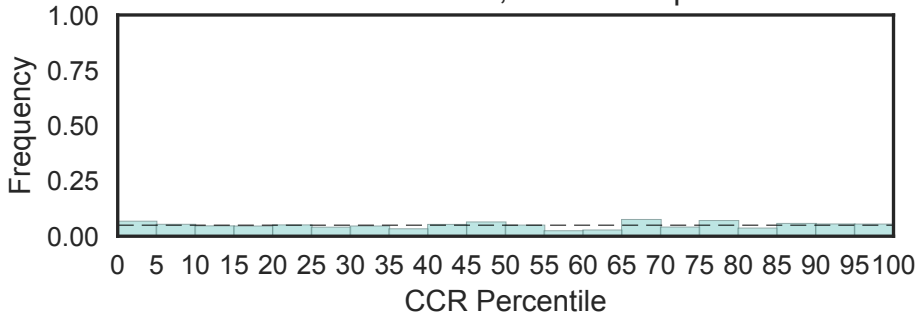



# Galanin

(Galanin, N=2)

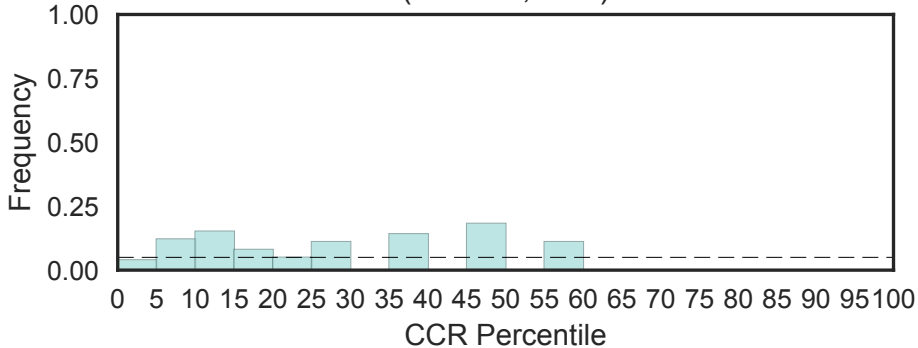

Gar1/Naf1 RNA binding region  
(Gar1, N=2)

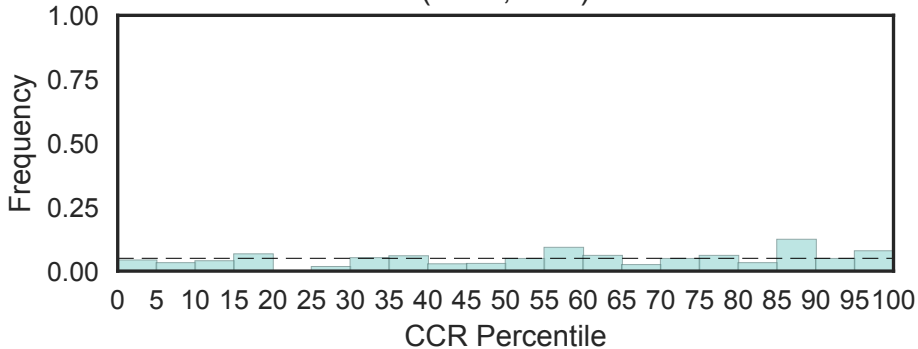

Gasdermin family  
(Gasdermin, N=7)

Fisher's OR: 0.319; Bonferroni p-val: 1

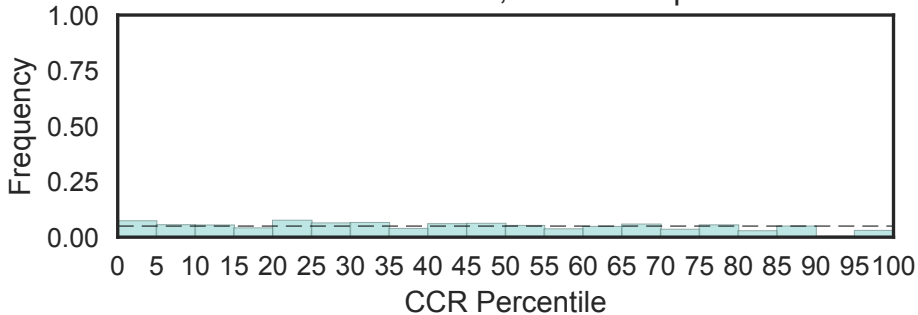

Gastrin/cholecystokinin family  
(Gastrin, N=2)

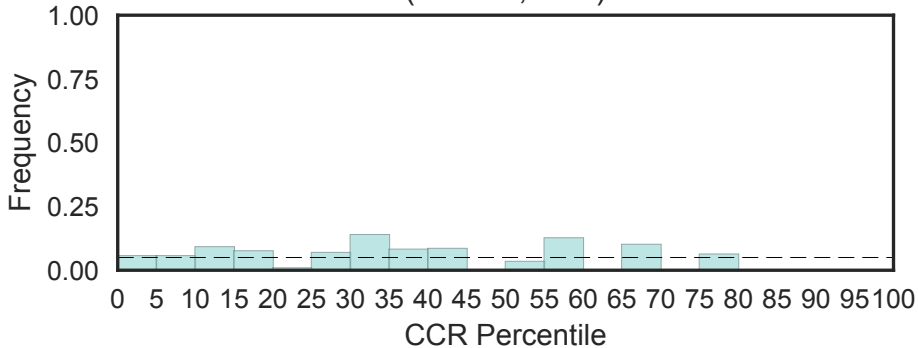

GatB/GatE catalytic domain  
(GatB\_N, N=1)

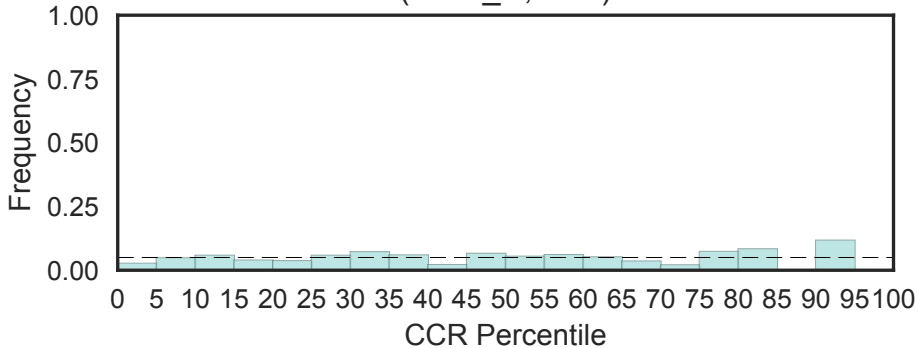

GatB domain  
(GatB\_Yqey, N=1)

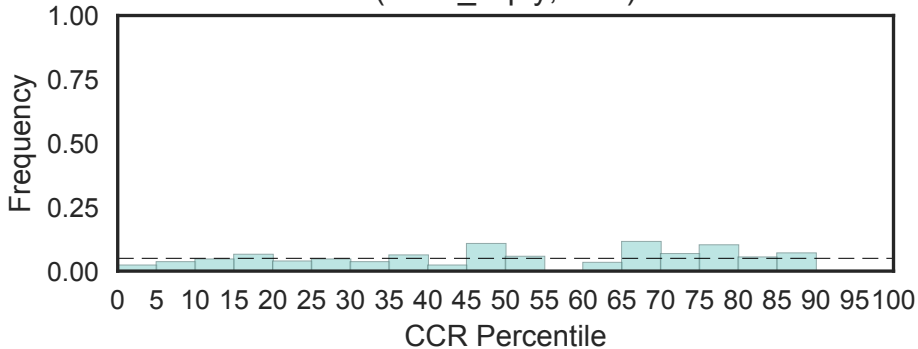

Nucleoside recognition  
(Gate, N=3)

Fisher's OR: 0; Bonferroni p-val: 1

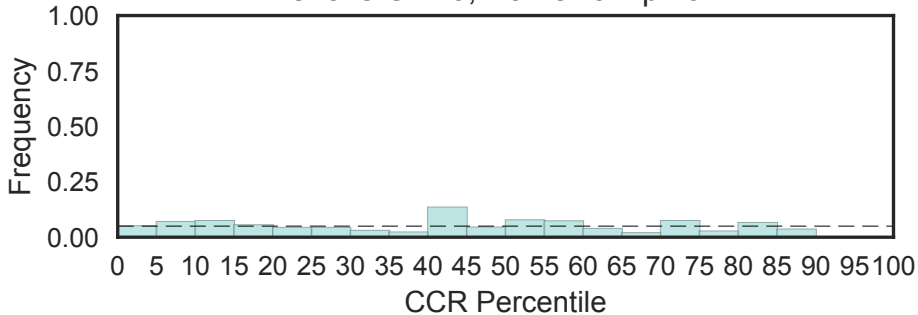

Alpha 1,4-glycosyltransferase conserved region  
(Gb3\_synth, N=2)

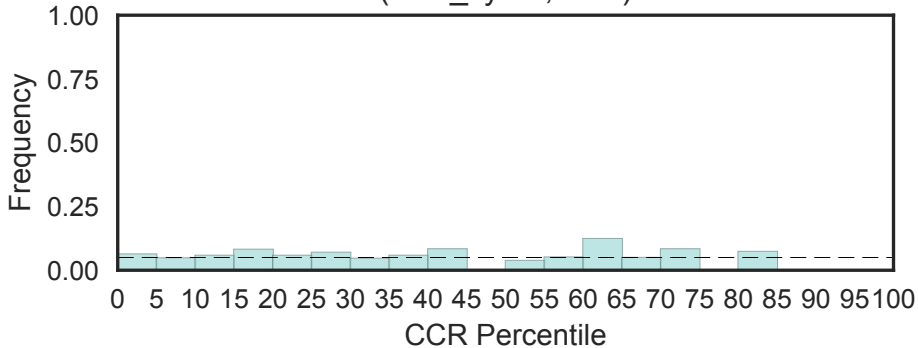



Gcd10p family  
(Gcd10p, N=1)

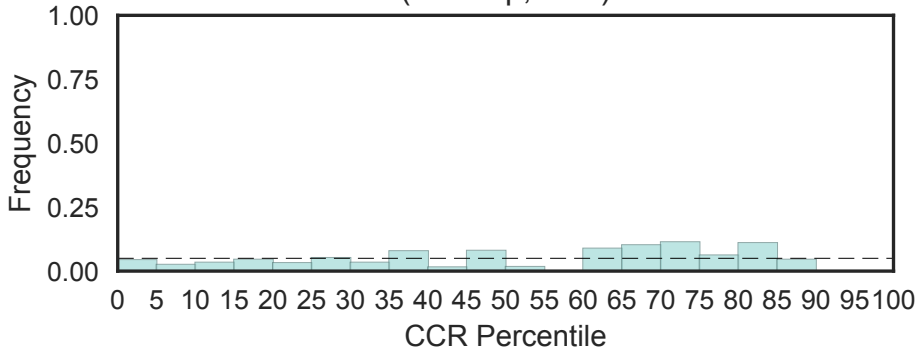

Gelsolin repeat  
(Gelsolin, N=46)

Fisher's OR: 0.0751; Bonferroni p-val: 0.262

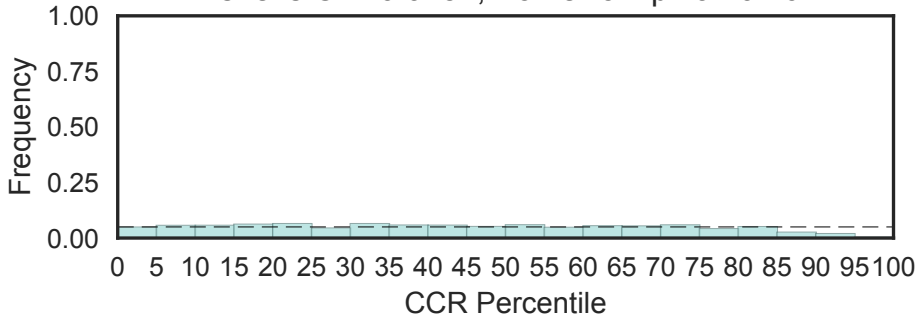

Gemin6 protein  
(Gemin6, N=1)

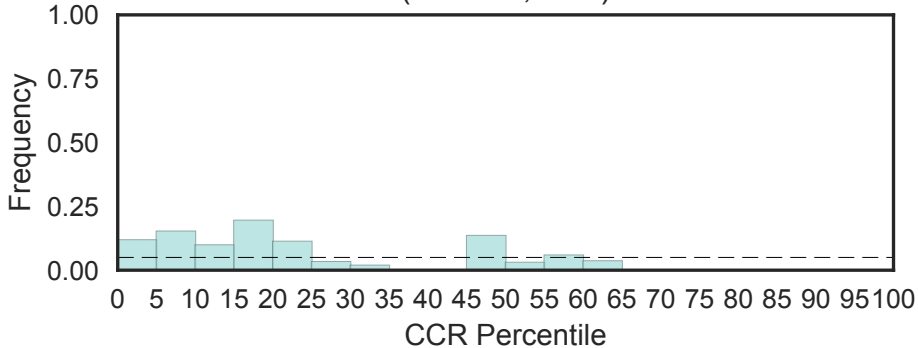

Gem-associated protein 7 (Gemin7)  
(Gemin7, N=1)

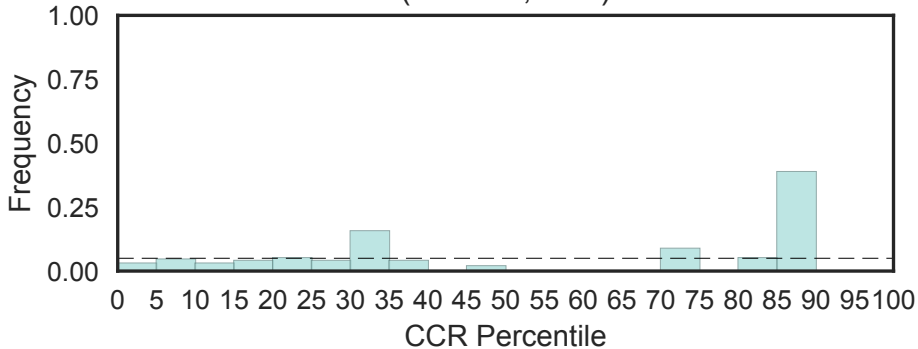

# Geminin

(Geminin, N=2)

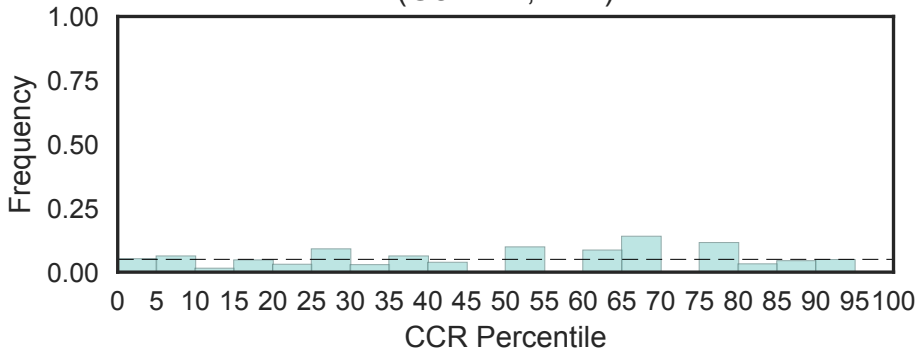

rRNA small subunit methyltransferase G  
(GidB, N=1)

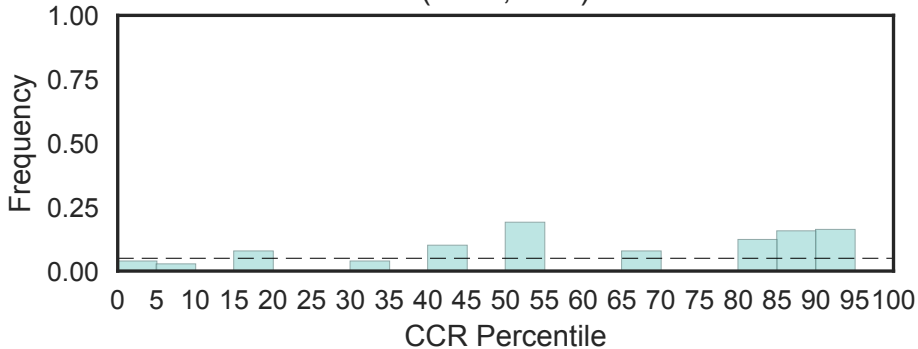

Vitamin K-dependent carboxylation/gamma-carboxyglutamic (GLA) domain  
(Gla, N=9)

Fisher's OR: 0; Bonferroni p-val: 1

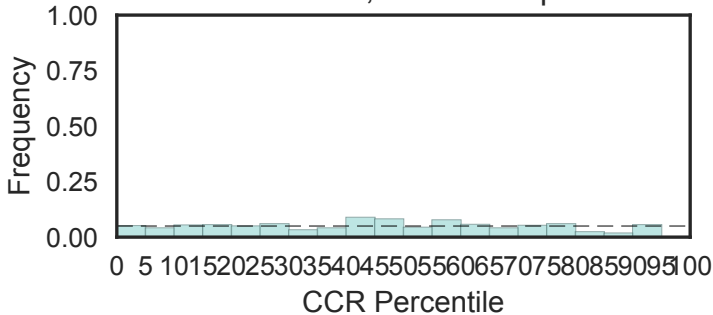

N-acylglucosamine 2-epimerase (GlcNAc 2-epimerase)  
(GlcNAc\_2-epim, N=1)

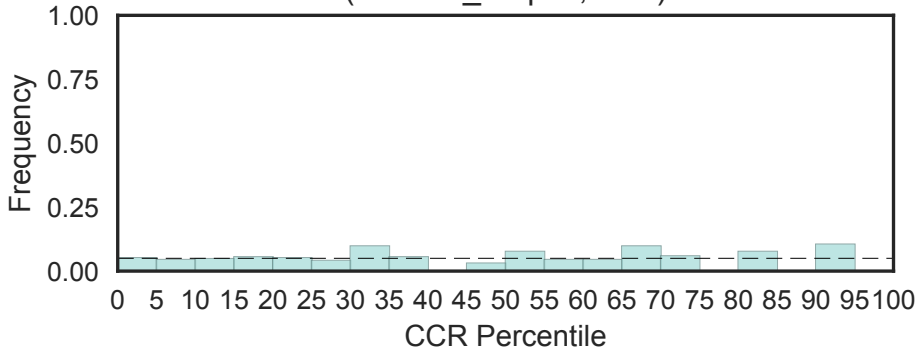



Glutamine synthetase, catalytic domain  
(Gln-synt\_C, N=2)

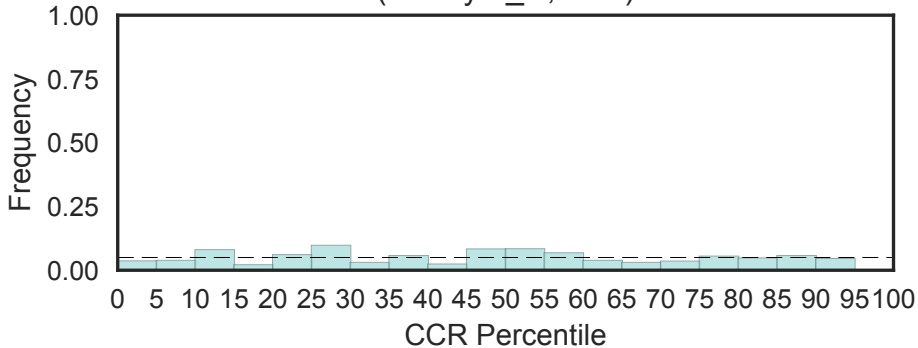

Glutamine synthetase, beta-Grasp domain  
(Gln-synt\_N, N=1)

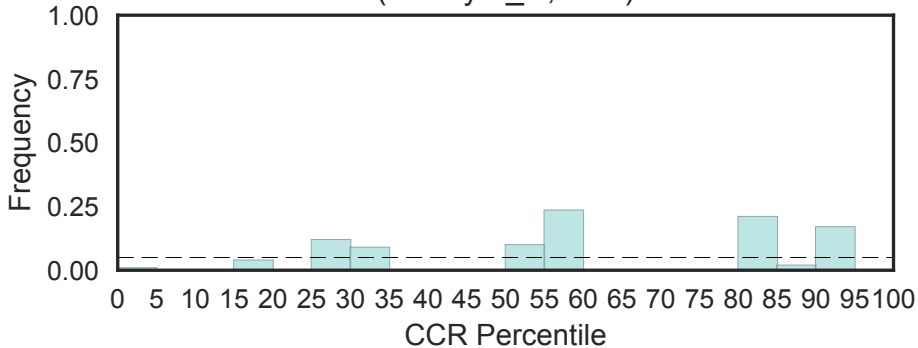

# Globin

(Globin, N=14)

Fisher's OR: 0.356; Bonferroni p-val: 1

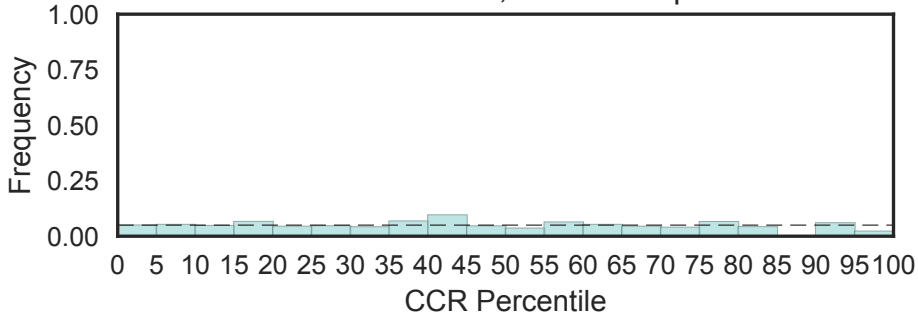

Glu-tRNA<sup>Gln</sup> amidotransferase C subunit  
(Glu-tRNA<sup>Gln</sup>, N=2)

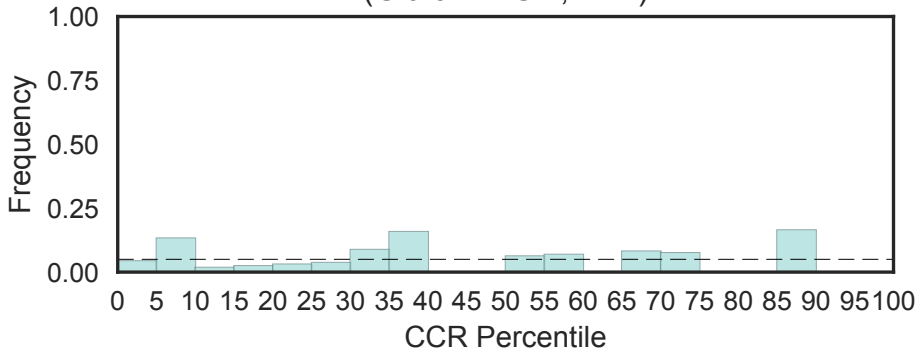

# Homer-binding domain of metabotropic glutamate receptor (GluR\_Homer-bdg, N=2)

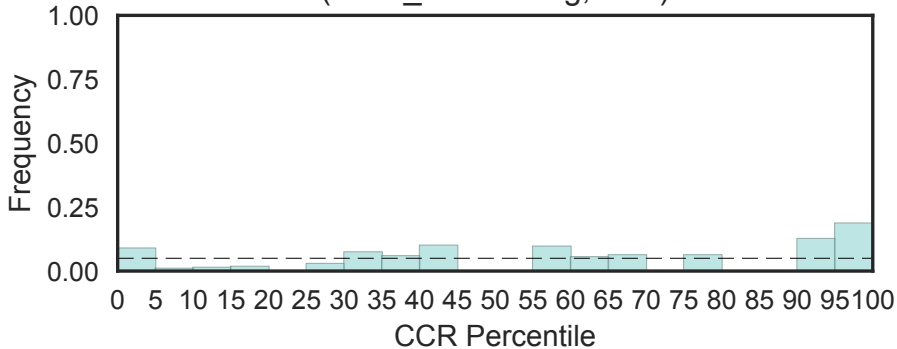

Conserved region in glutamate synthase  
(Glu\_synthase, N=1)

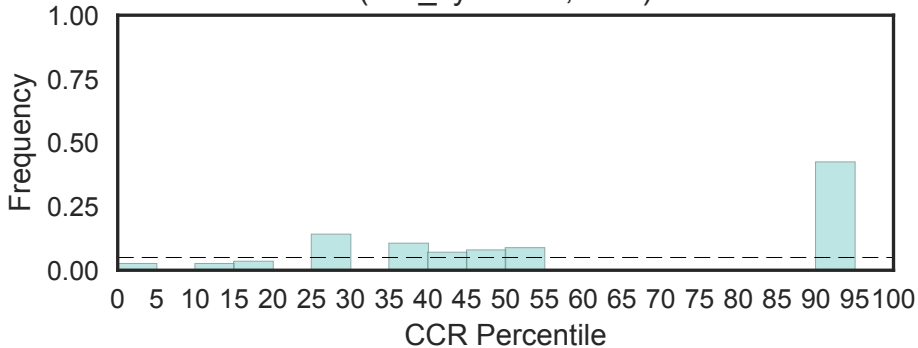

# Glucosamine-6-phosphate isomerases/6-phosphogluconolactonase (Glucosamine\_iso, N=4)

Fisher's OR: 0.342; Bonferroni p-val: 1

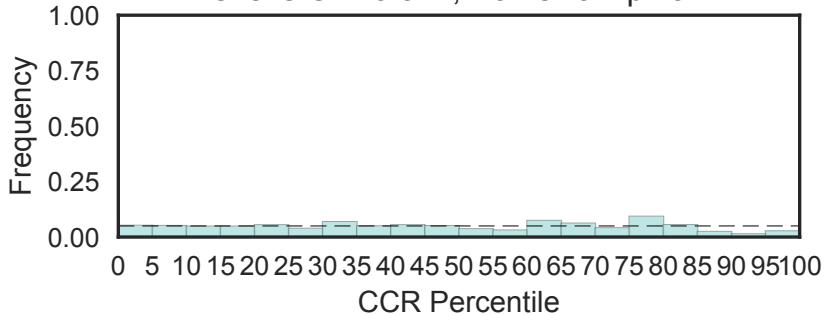

# Glutaminase (Glutaminase, N=2)

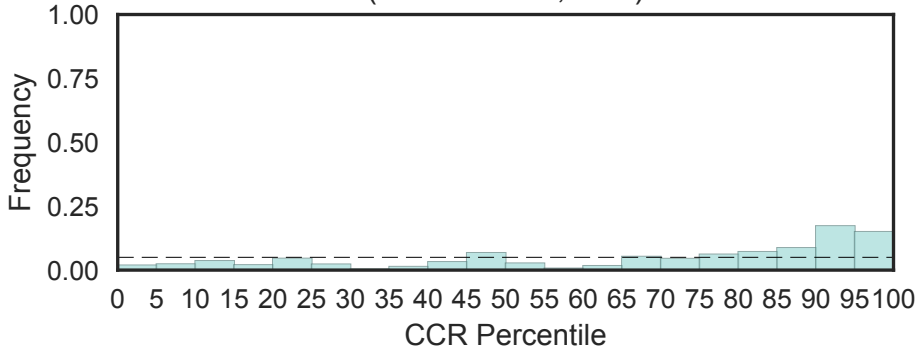



Glutaredoxin  
(Glutaredoxin, N=12)  
Fisher's OR: 0; Bonferroni p-val: 1

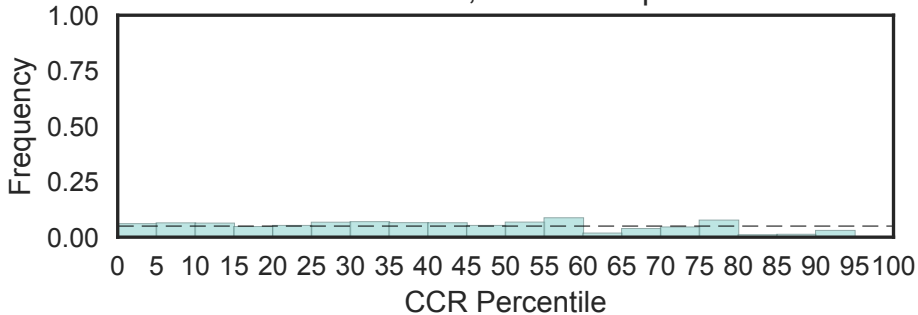

Aralkyl acyl-CoA:amino acid N-acyltransferase, C-terminal region  
(Gly\_acyl\_tr\_C, N=4)

Fisher's OR: 0; Bonferroni p-val: 1

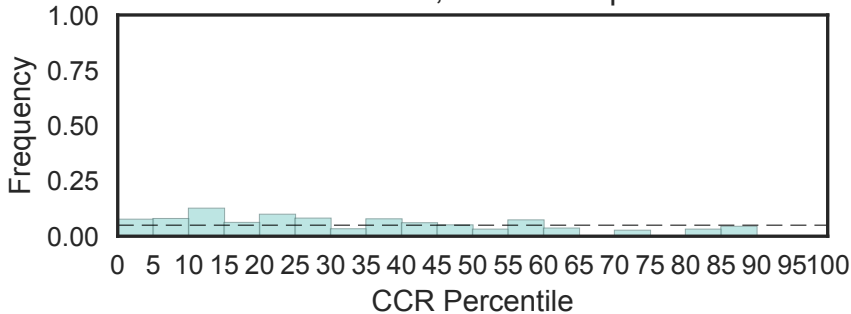

Aralkyl acyl-CoA:amino acid N-acyltransferase  
(Gly\_acyl\_tr\_N, N=4)

Fisher's OR: 0; Bonferroni p-val: 1

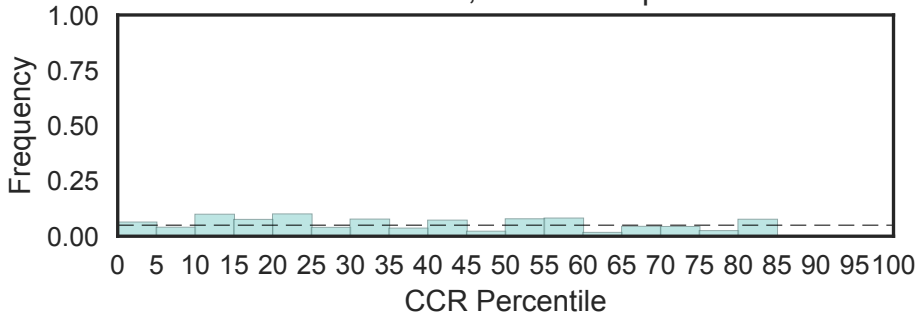

Glycine rich protein  
(Gly\_rich, N=2)

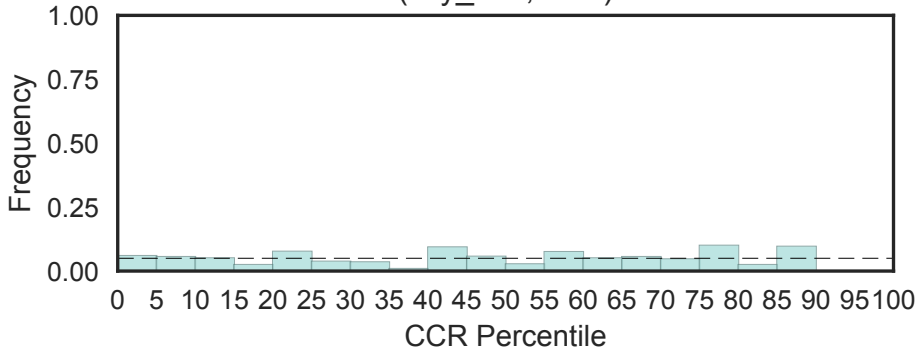

# Glycosyltransferase sugar-binding region containing DXD motif (Gly\_transf\_sug, N=2)

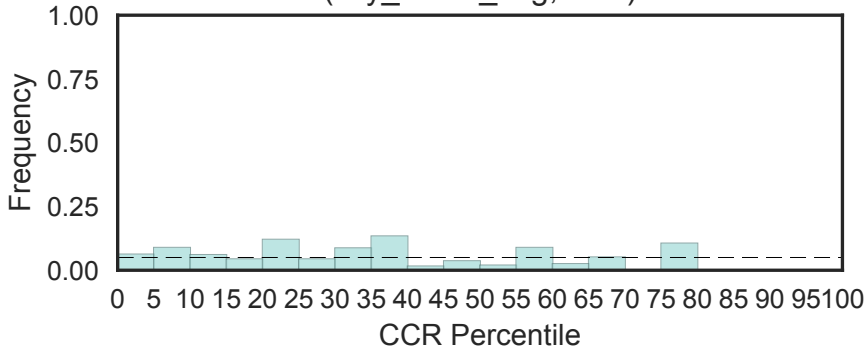

beta-glucosidase 2, glycosyl-hydrolase family 116 N-term  
(Glyco\_hydr\_116N, N=1)

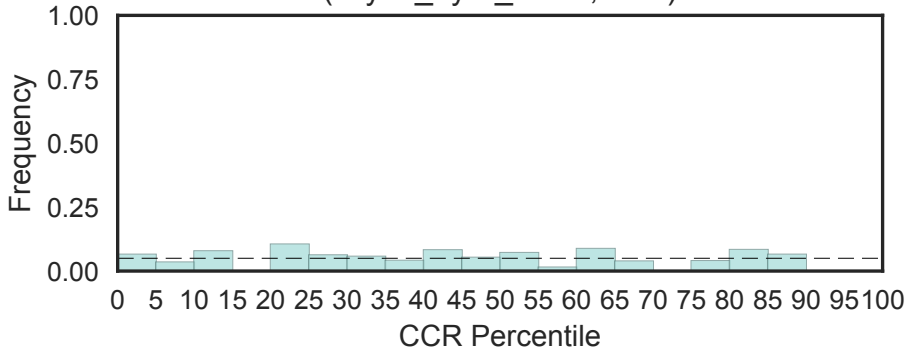

# Glycosyl hydrolase family 1

(Glyco\_hydro\_1, N=11)

Fisher's OR: 0.414; Bonferroni p-val: 1

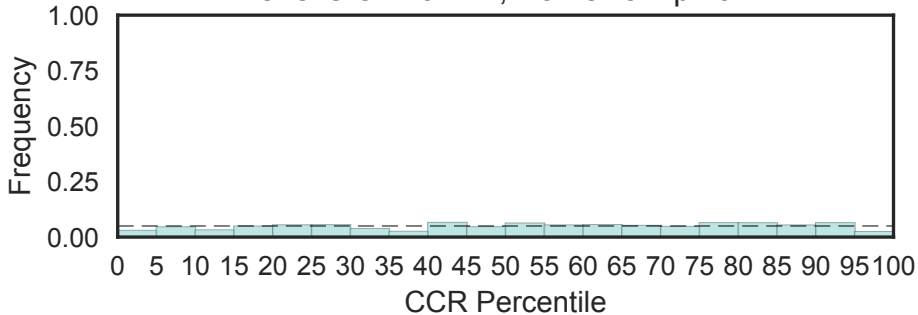

Glycosyl hydrolases family 15  
(Glyco\_hydro\_15, N=1)

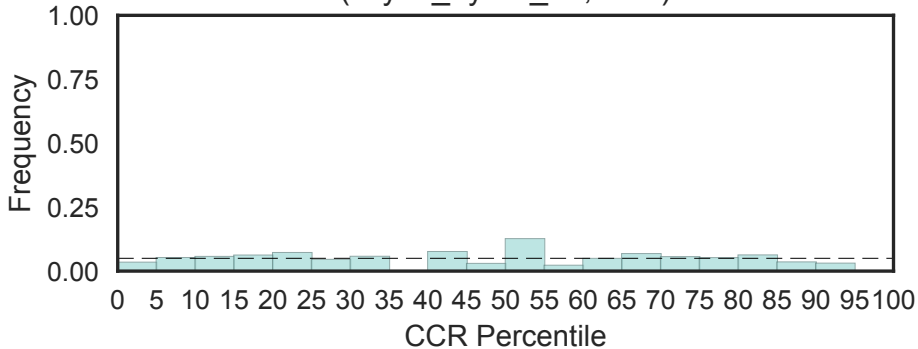



# Glycosyl hydrolases family 18

(Glyco\_hydro\_18, N=7)

Fisher's OR: 0; Bonferroni p-val: 1

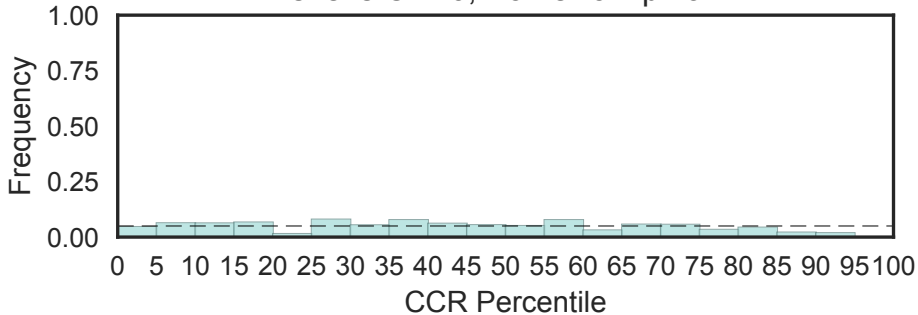

Glycosyl hydrolases family 2  
(Glyco\_hydro\_2, N=1)

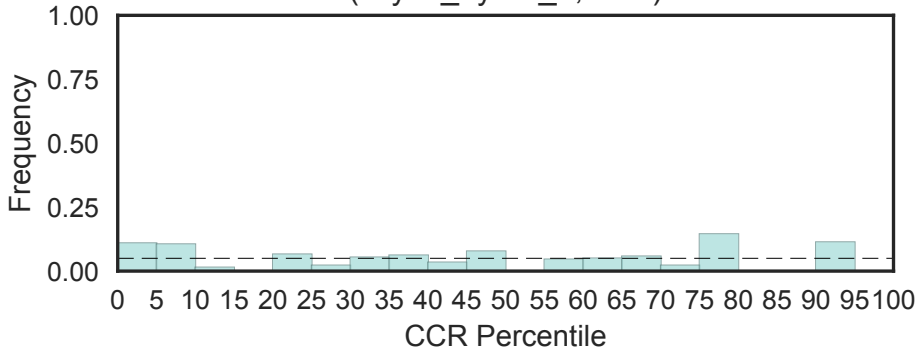

Glycosyl hydrolase family 20, catalytic domain  
(Glyco\_hydro\_20, N=3)

Fisher's OR: 0; Bonferroni p-val: 1

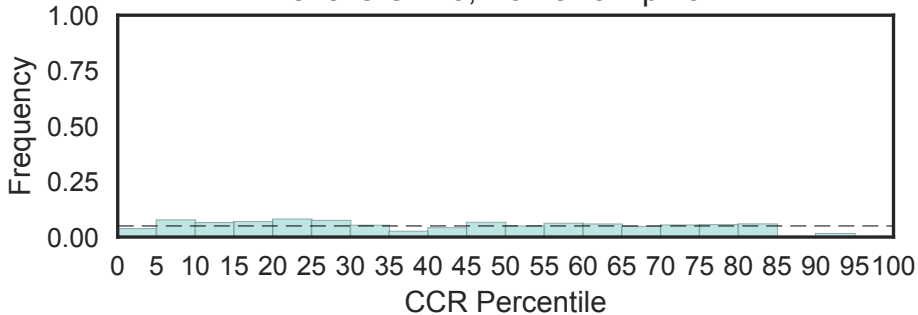

Glycosyl hydrolases family 2, TIM barrel domain  
(Glyco\_hydro\_2\_C, N=2)

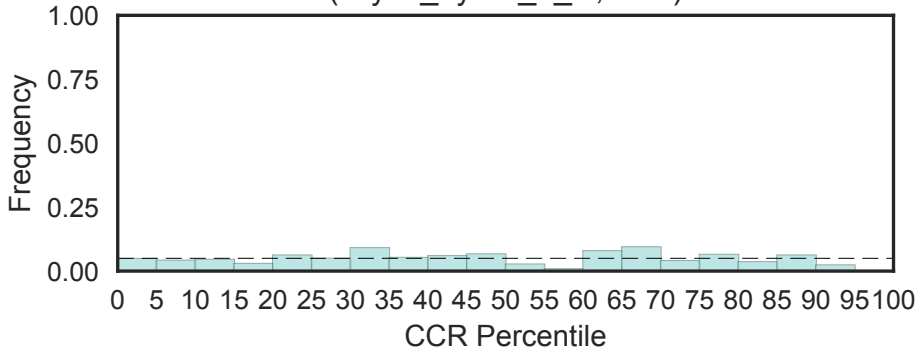

Glycosyl hydrolases family 2, sugar binding domain  
(Glyco\_hydro\_2\_N, N=1)

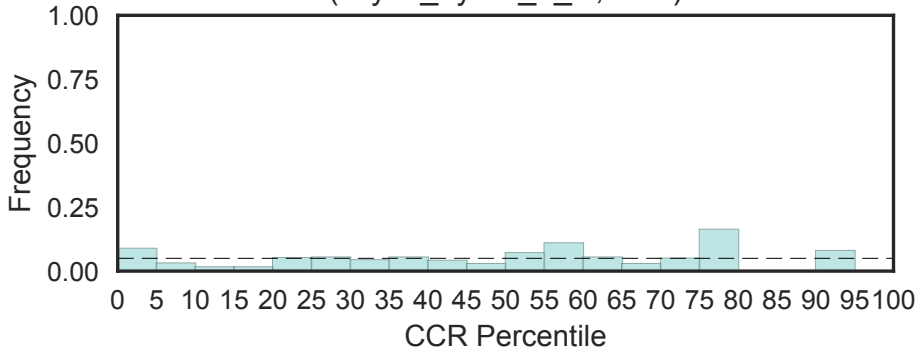

# Glycosyl hydrolases family 31

(Glyco\_hydro\_31, N=9)

Fisher's OR: 0.0785; Bonferroni p-val: 0.556

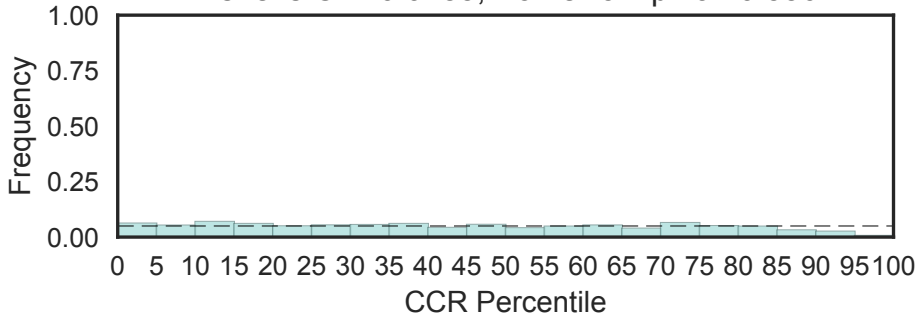

# Glycosyl hydrolases family 35

(Glyco\_hydro\_35, N=5)

Fisher's OR: 0; Bonferroni p-val: 1

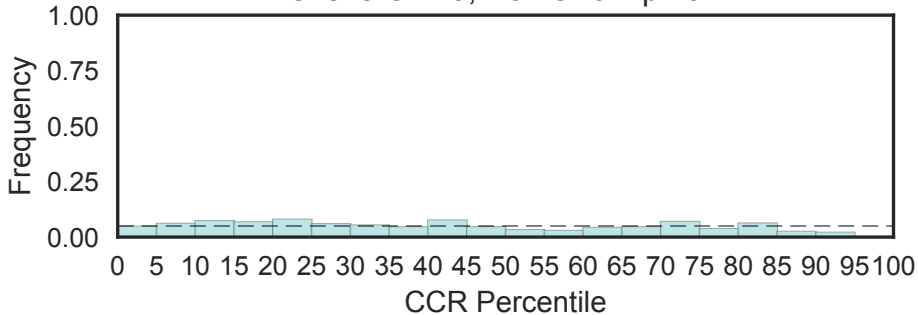

Glycosyl hydrolases family 38 N-terminal domain  
(Glyco\_hydro\_38, N=6)

Fisher's OR: 0; Bonferroni p-val: 1

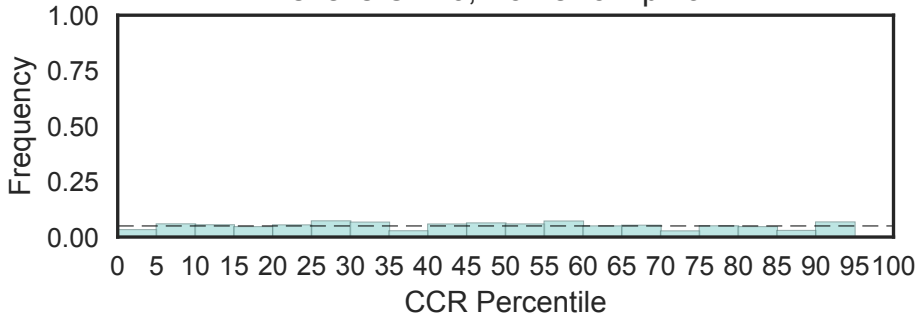



Glycosyl hydrolases family 38 C-terminal domain  
(Glyco\_hydro\_38C, N=5)

Fisher's OR: 0.0963; Bonferroni p-val: 1

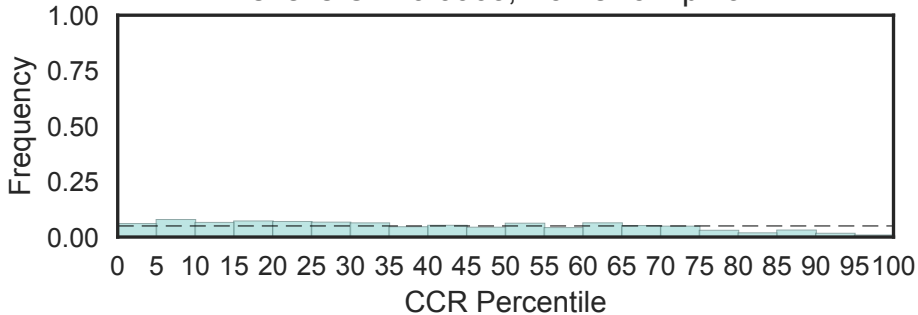

Glycosyl hydrolases family 39  
(Glyco\_hydro\_39, N=2)

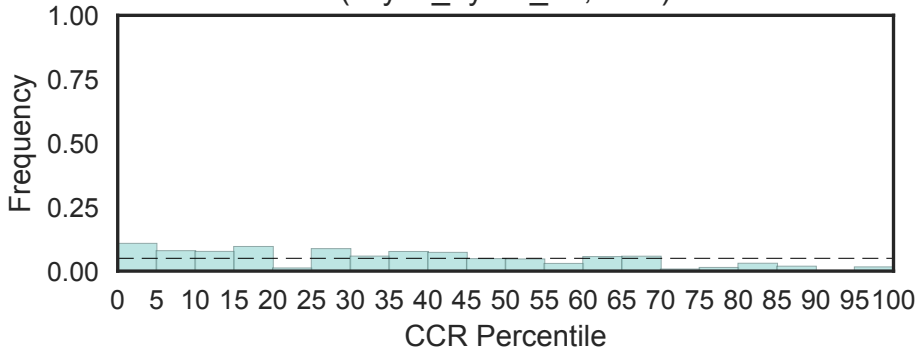

Beta-galactosidase  
(Glyco\_hydro\_42, N=4)  
Fisher's OR: 0; Bonferroni p-val: 1

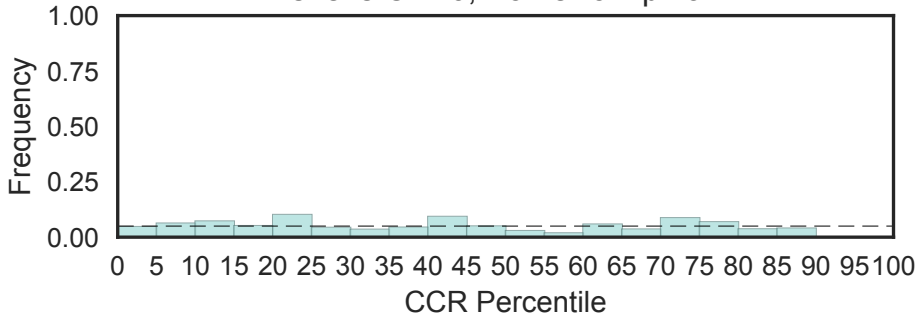

# Glycosyl hydrolase family 47

(Glyco\_hydro\_47, N=9)

Fisher's OR: 0.983; Bonferroni p-val: 1

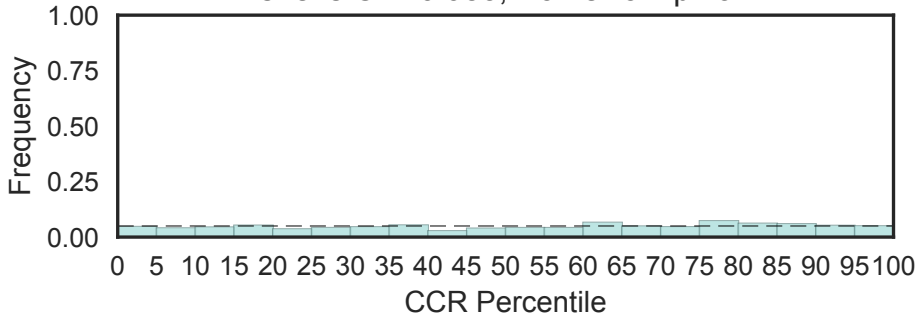

Hyaluronidase  
(Glyco\_hydro\_56, N=5)  
Fisher's OR: 0; Bonferroni p-val: 1

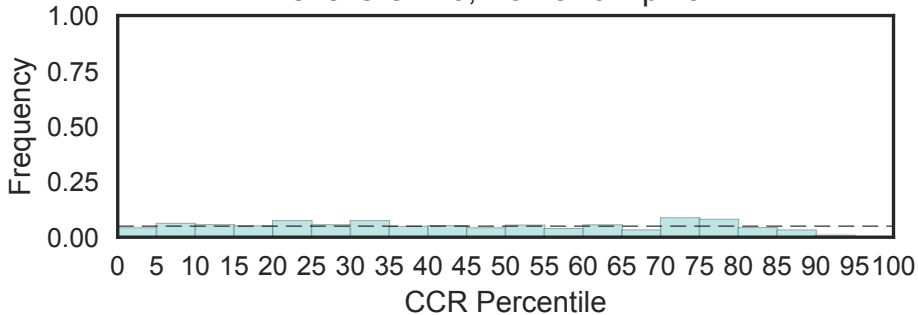

Glycosyl hydrolase family 59  
(Glyco\_hydro\_59, N=1)

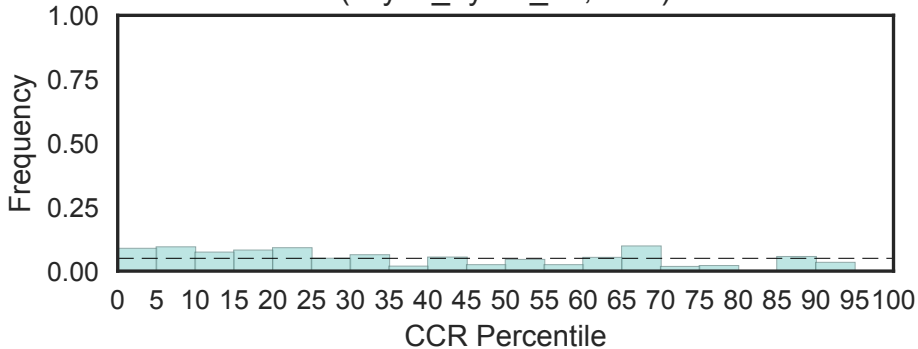

Glycosyl hydrolase family 59 central domain  
(Glyco\_hydro\_59M, N=1)

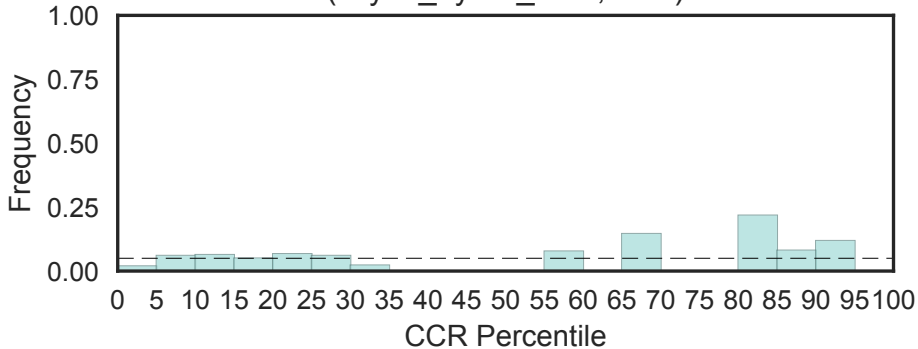

Glycosyl hydrolase family 63 C-terminal domain  
(Glyco\_hydro\_63, N=1)

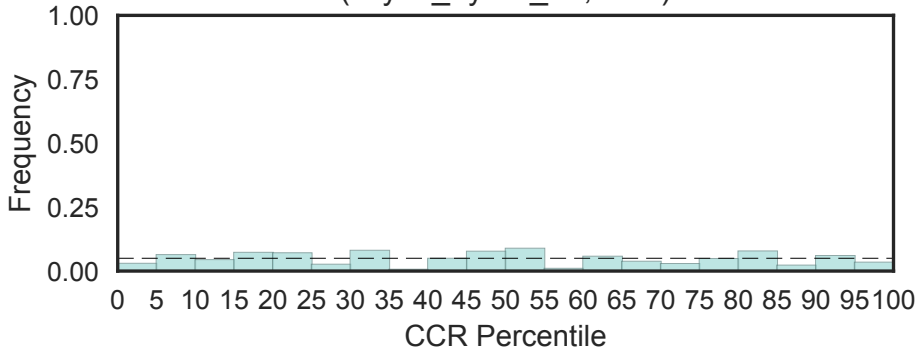



Glycosyl hydrolase family 63 N-terminal domain  
(Glyco\_hydro\_63N, N=1)

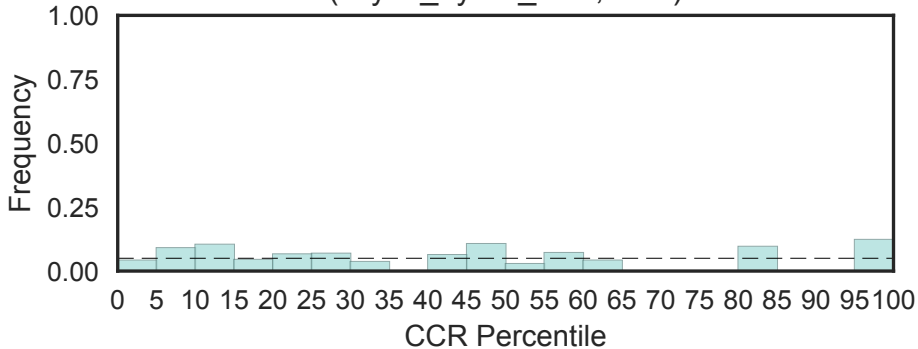

Glycosyl hydrolase family 65 central catalytic domain  
(Glyco\_hydro\_65m, N=1)

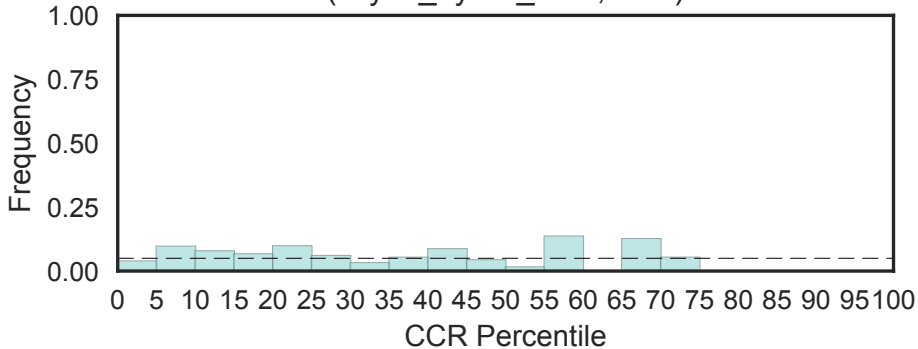

Glycosyl hydrolase family 79, N-terminal domain  
(Glyco\_hydro\_79n, N=2)

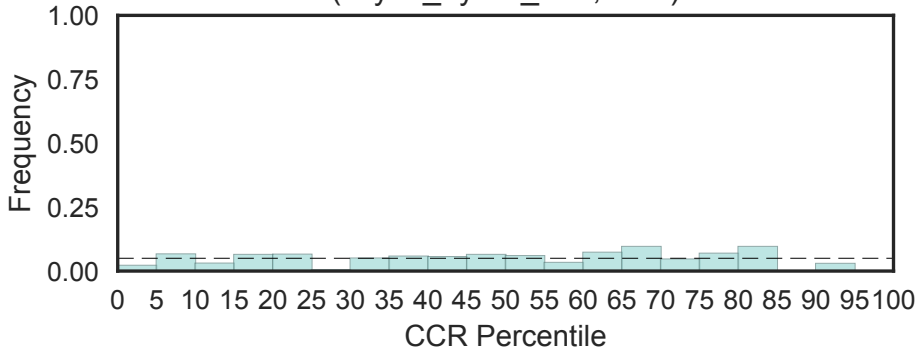

Glycosyl hydrolase family 85  
(Glyco\_hydro\_85, N=2)

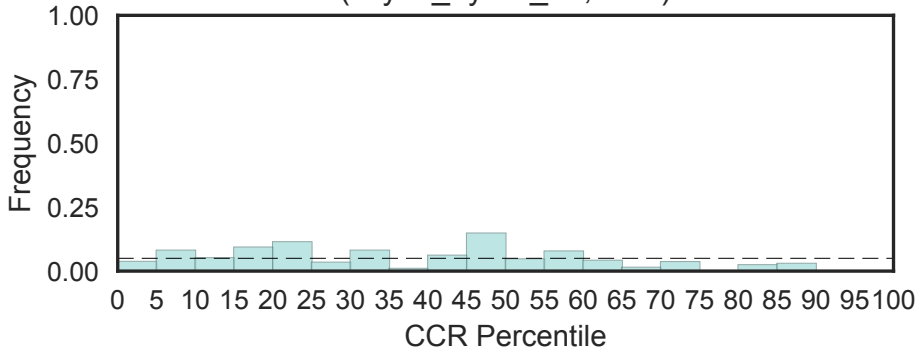

Glycosyl hydrolase family 99  
(Glyco\_hydro\_99, N=2)

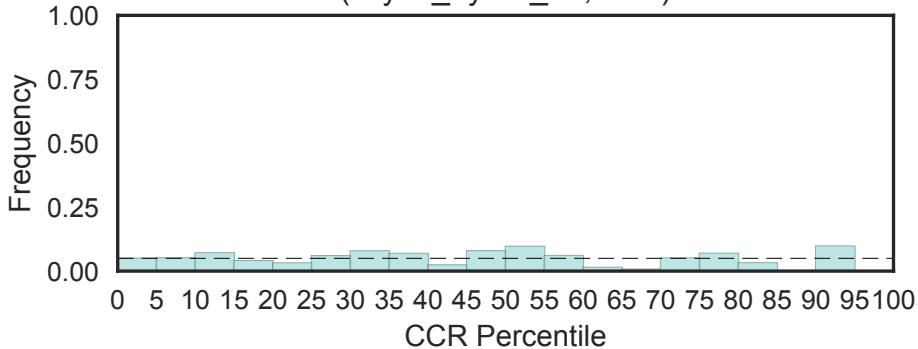

Fucosyltransferase, N-terminal  
(Glyco\_tran\_10\_N, N=9)  
Fisher's OR: 0.381; Bonferroni p-val: 1

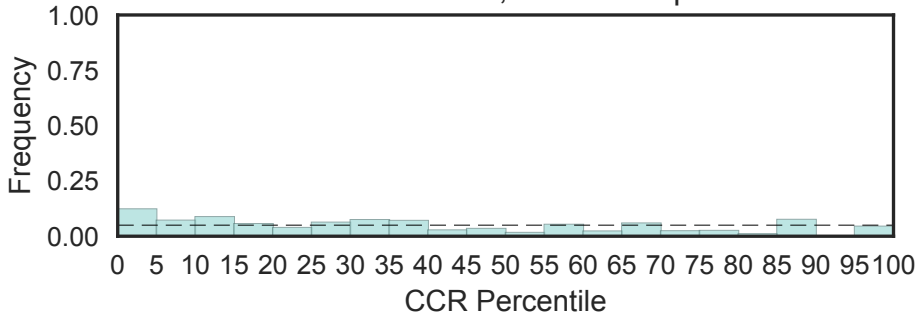

Glycosyltransferase family 28 C-terminal domain  
(Glyco\_tran\_28\_C, N=22)

Fisher's OR: 0.215; Bonferroni p-val: 1

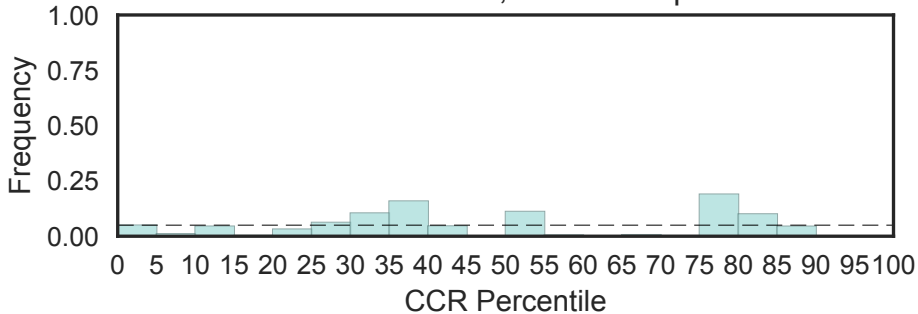

Glycosyltransferase like family 2  
(Glyco\_tranf\_2\_2, N=1)

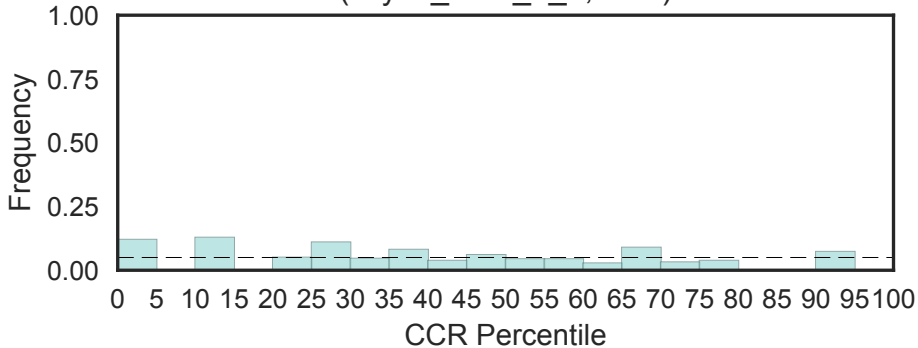



Glycosyltransferase like family 2  
(Glyco\_tranf\_2\_3, N=12)  
Fisher's OR: 1.28; Bonferroni p-val: 1

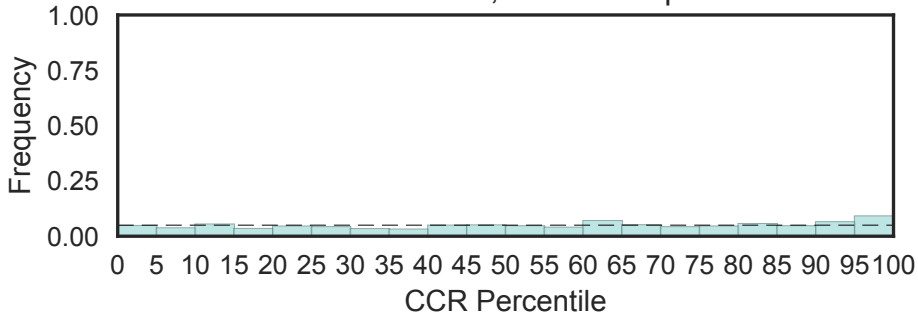

# Glycosyl transferase family 2

(Glyco\_tranf\_2\_4, N=3)

Fisher's OR: 0.865; Bonferroni p-val: 1

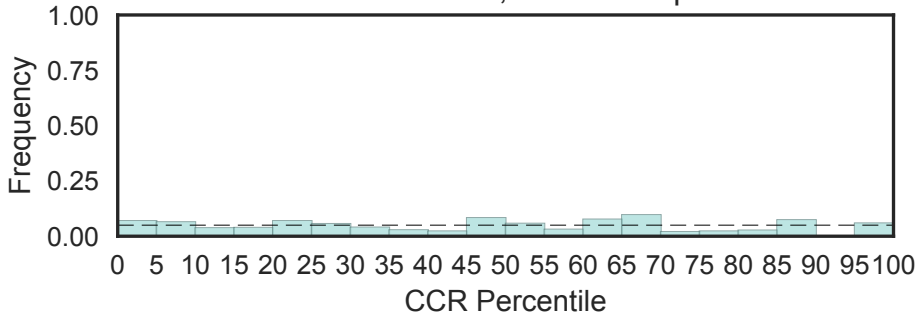

Glycosyl transferases group 1  
(Glyco\_trans\_1\_2, N=2)

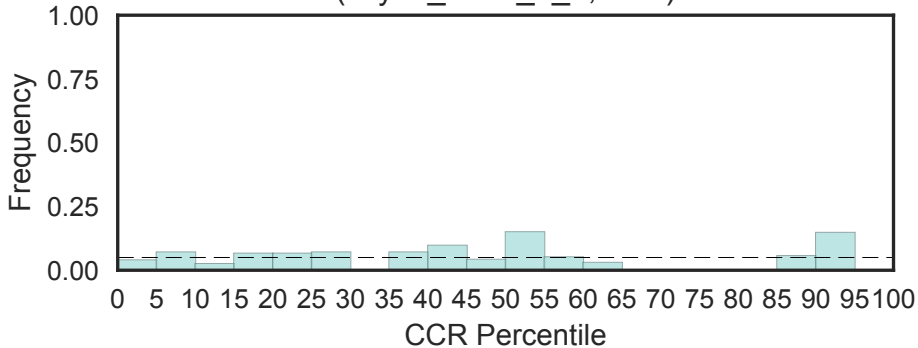

Glycosyl transferases group 1  
(Glyco\_trans\_1\_4, N=4)  
Fisher's OR: 0; Bonferroni p-val: 1

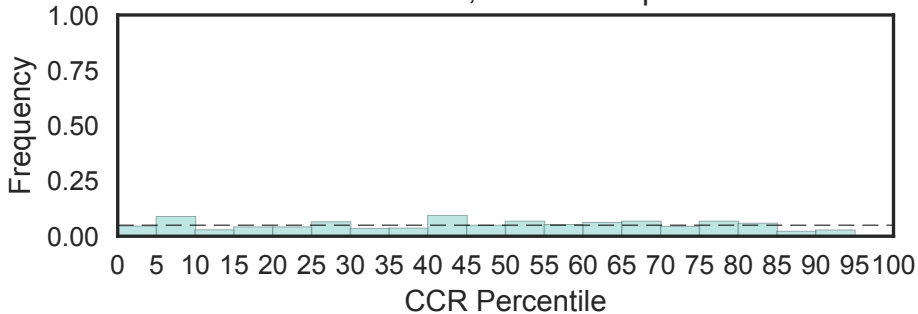

# Glycosyl transferase family group 2

(Glyco\_trans\_2\_3, N=4)

Fisher's OR: 4.98; Bonferroni p-val: 0.342

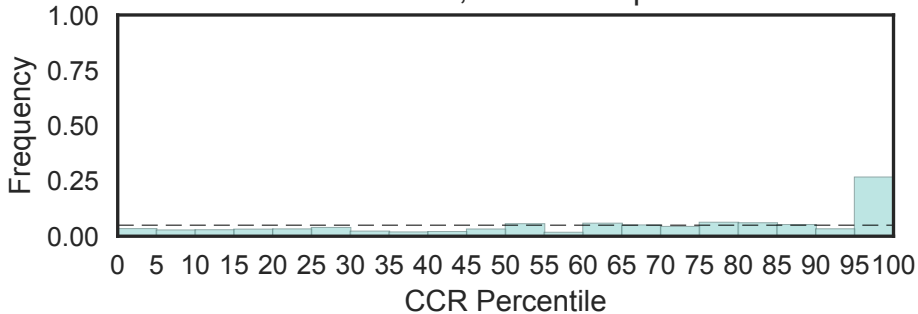

Glycosyl transferase 4-like domain  
(Glyco\_trans\_4\_4, N=1)

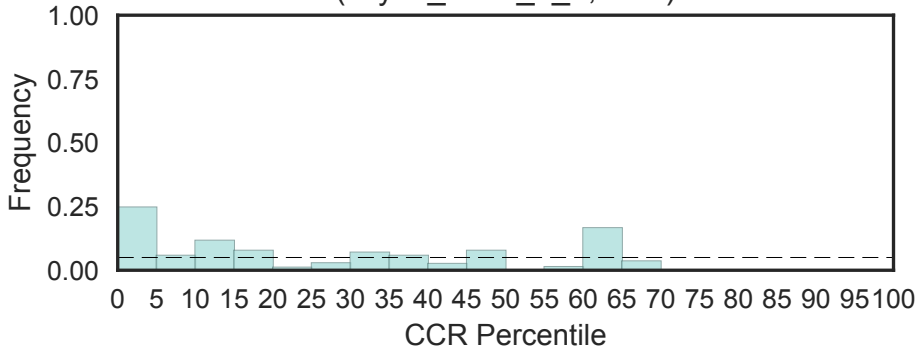

Glycosyltransferase family 10 (fucosyltransferase) C-term  
(Glyco\_transf\_10, N=8)

Fisher's OR: 0; Bonferroni p-val: 1

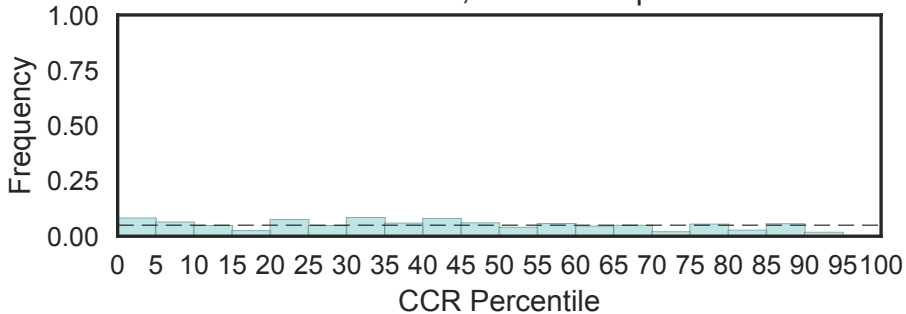

Glycosyl transferase family 11  
(Glyco\_transf\_11, N=2)

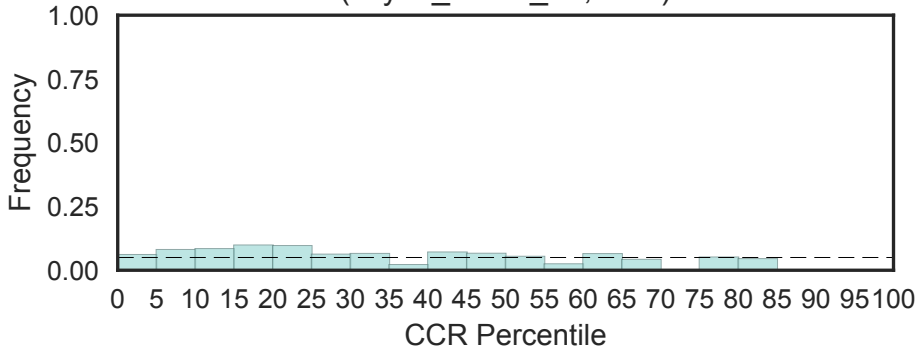



Glycosyltransferase family 17  
(Glyco\_transf\_17, N=1)

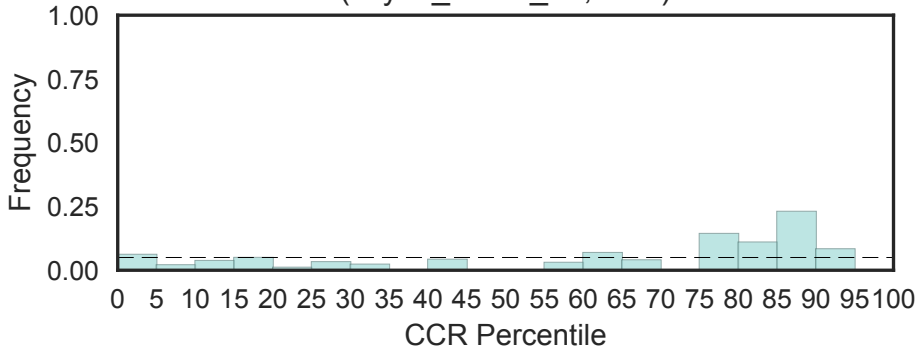

Glycosyltransferase family 18  
(Glyco\_transf\_18, N=2)

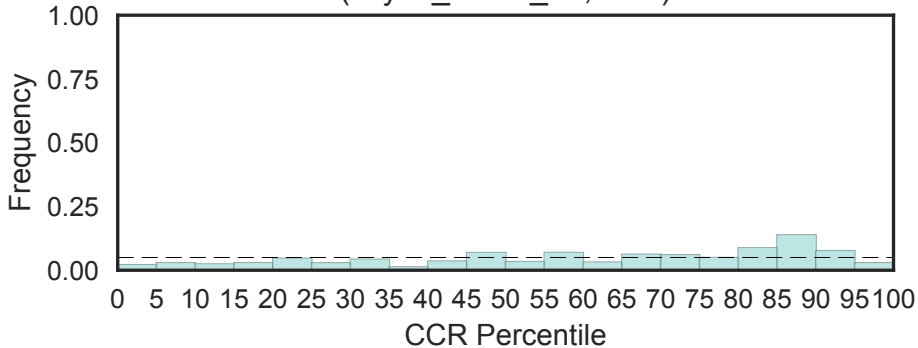

# Glycosyl transferase family 21

(Glyco\_transf\_21, N=3)

Fisher's OR: 1.26; Bonferroni p-val: 1

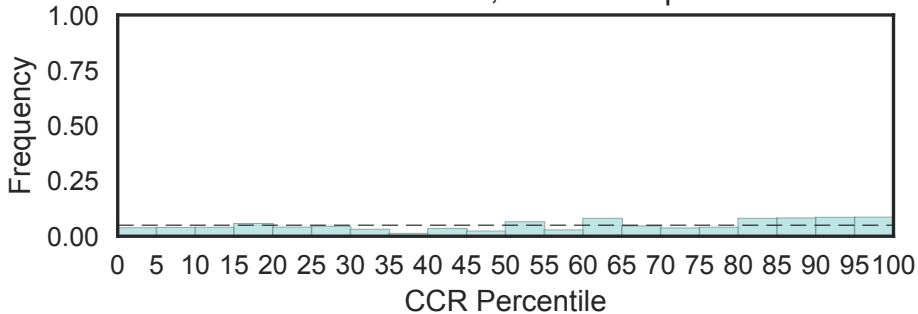

Alg9-like mannosyltransferase family  
(Glyco\_transf\_22, N=5)

Fisher's OR: 0; Bonferroni p-val: 1

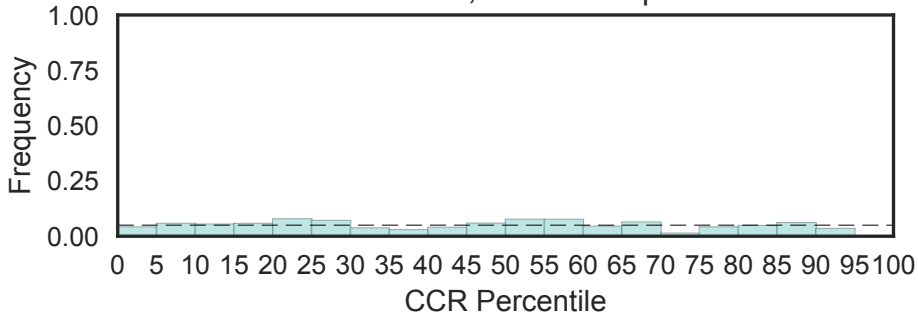

Glycosyltransferase family 25 (LPS biosynthesis protein)  
(Glyco\_transf\_25, N=3)

Fisher's OR: 0; Bonferroni p-val: 1

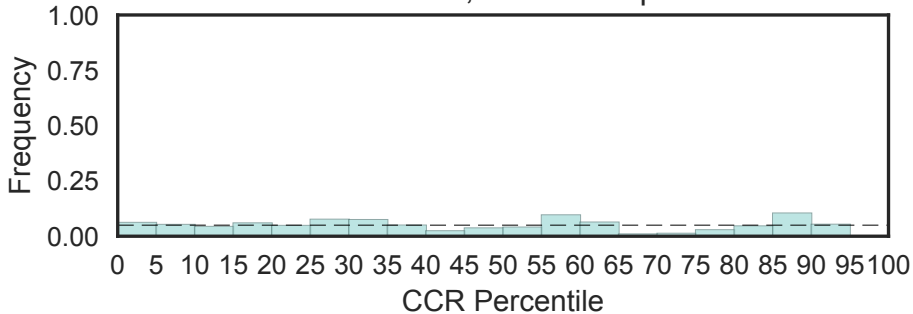

Glycosyltransferase family 29 (sialyltransferase)  
(Glyco\_transf\_29, N=20)

Fisher's OR: 0.546; Bonferroni p-val: 1

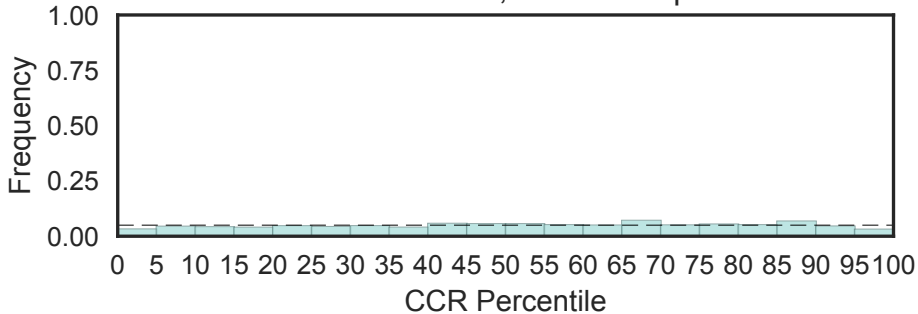

# Glycosyltransferase Family 4 (Glyco\_transf\_4, N=2)

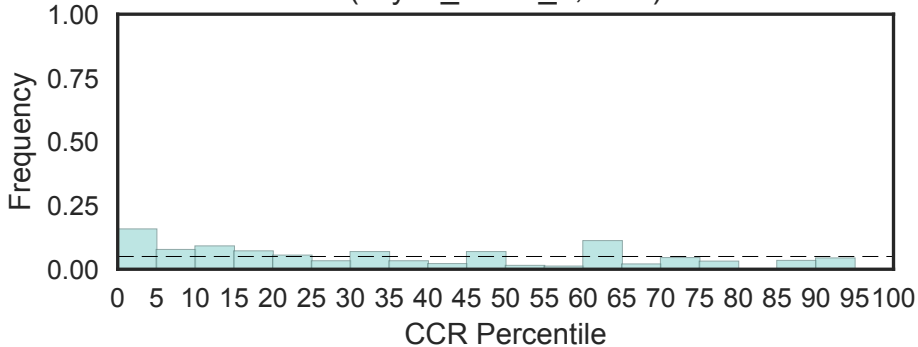

# Glycosyltransferase family 43

(Glyco\_transf\_43, N=3)

Fisher's OR: 2.16; Bonferroni p-val: 1

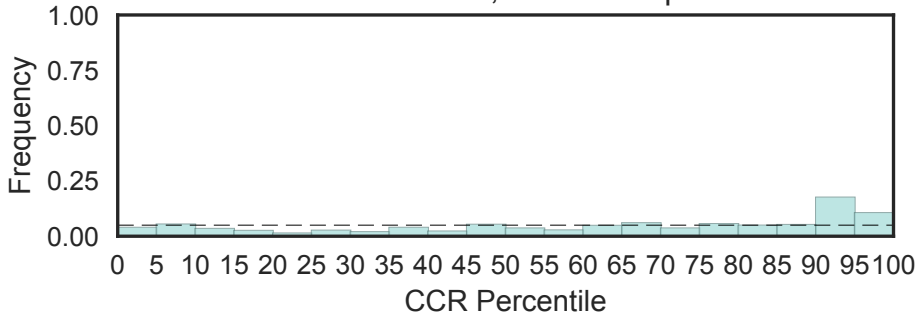



Glycosyl-transferase for dystroglycan  
(Glyco\_transf\_49, N=4)  
Fisher's OR: 0.971; Bonferroni p-val: 1

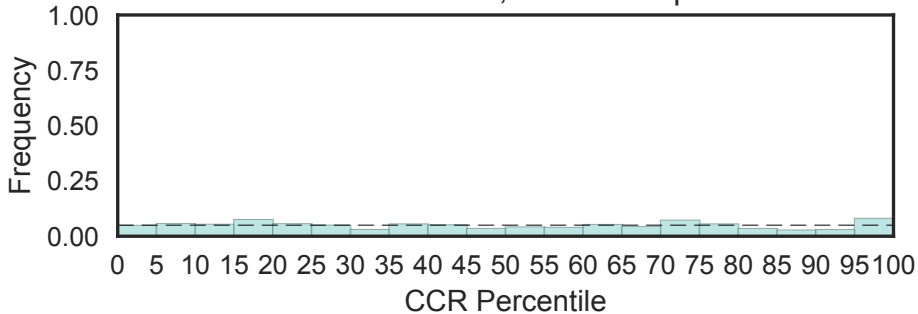

Starch synthase catalytic domain  
(Glyco\_transf\_5, N=1)

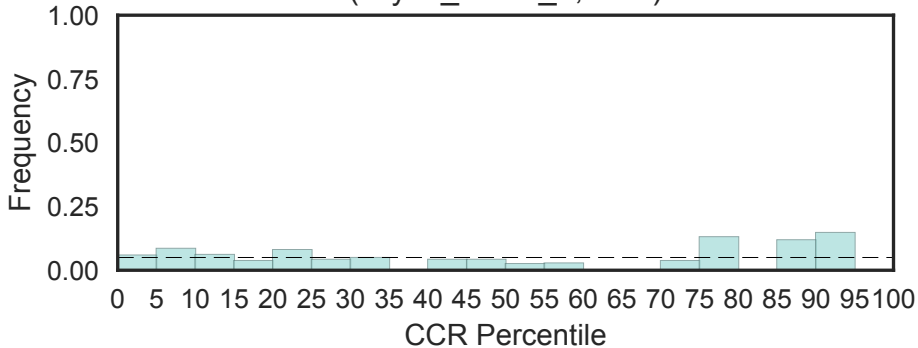

N-Acetylglucosaminyltransferase-IV (GnT-IV) conserved region  
(Glyco\_transf\_54, N=5)

Fisher's OR: 0.671; Bonferroni p-val: 1

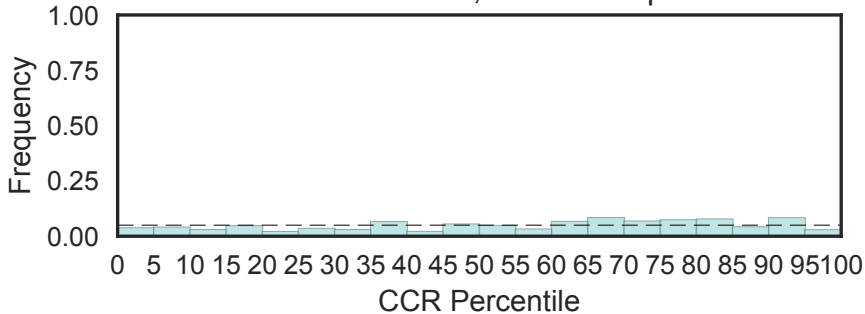

# Glycosyltransferase family 6

(Glyco\_transf\_6, N=4)

Fisher's OR: 0; Bonferroni p-val: 1

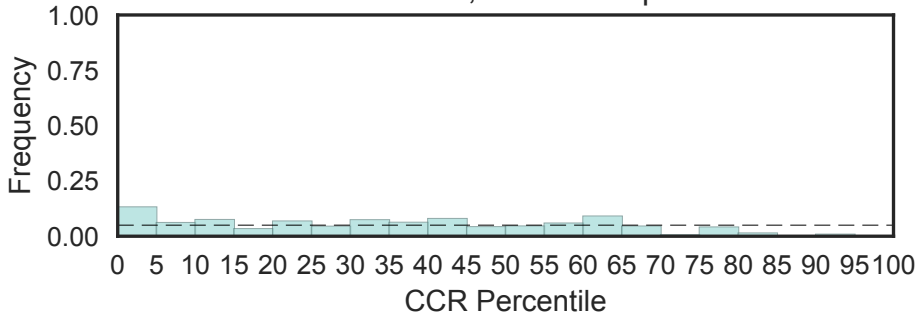

Glycosyl transferase family 64 domain  
(Glyco\_transf\_64, N=5)

Fisher's OR: 1.74; Bonferroni p-val: 1

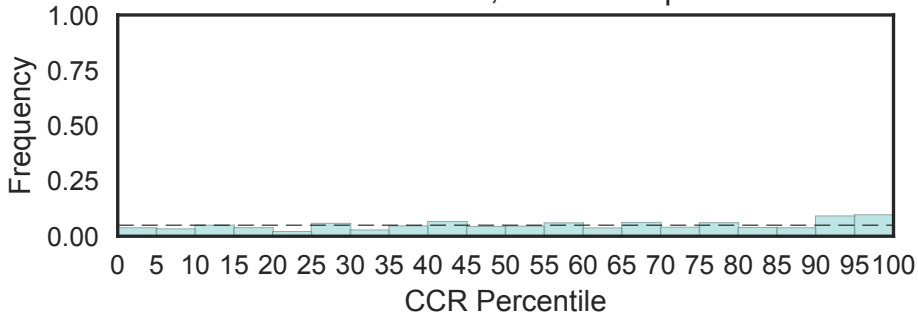

N-terminal domain of galactosyltransferase  
(Glyco\_transf\_7C, N=24)

Fisher's OR: 1.51; Bonferroni p-val: 1

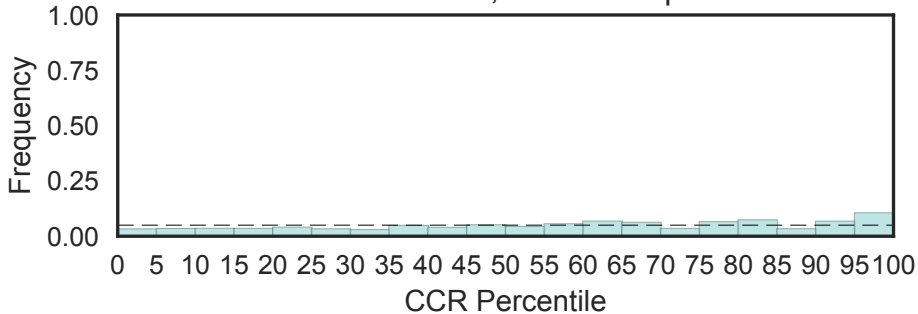

N-terminal region of glycosyl transferase group 7  
(Glyco\_transf\_7N, N=7)

Fisher's OR: 0.653; Bonferroni p-val: 1

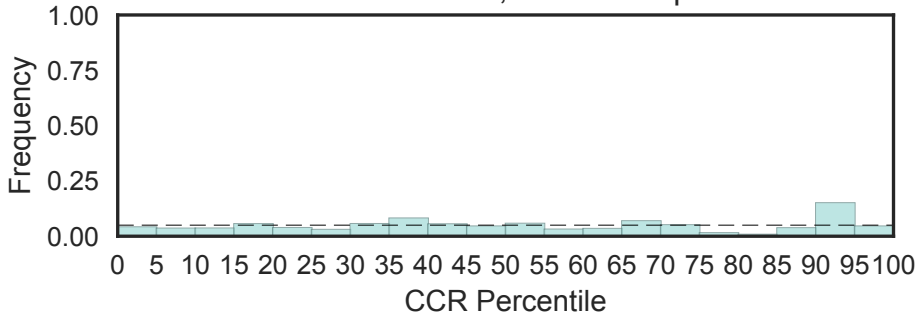

# Glycosyl transferase family 8

(Glyco\_transf\_8, N=9)

Fisher's OR: 0.402; Bonferroni p-val: 1

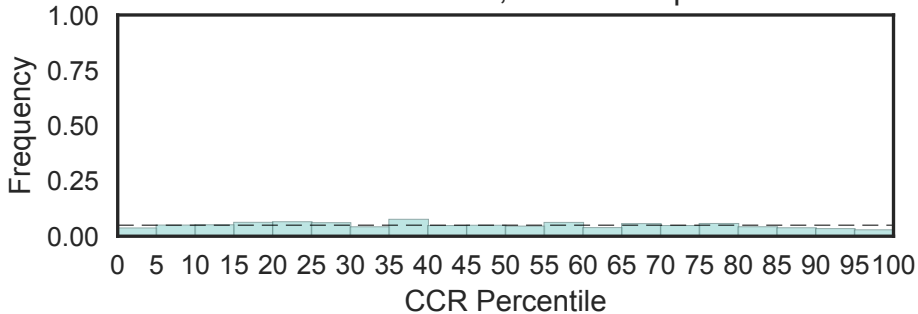



Glycosyl transferase family 90  
(Glyco\_transf\_90, N=3)  
Fisher's OR: 0.27; Bonferroni p-val: 1

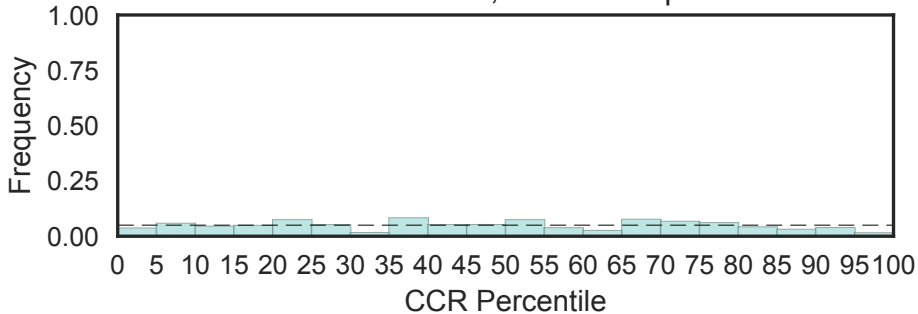

Glycogen synthase  
(Glycogen\_syn, N=2)

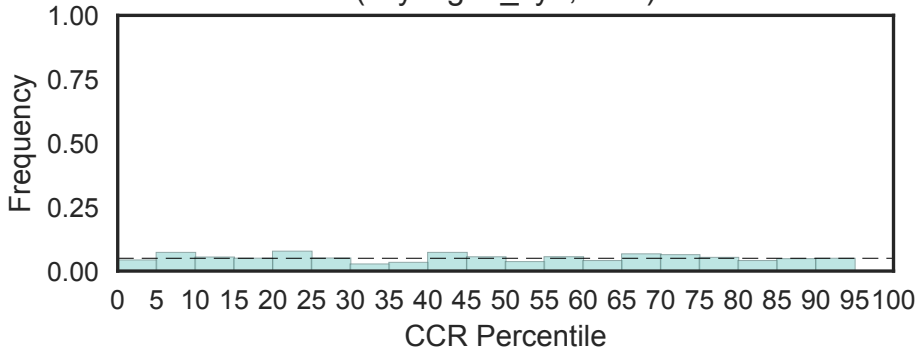

beta-acetyl hexosaminidase like  
(Glycohydro\_20b2, N=2)

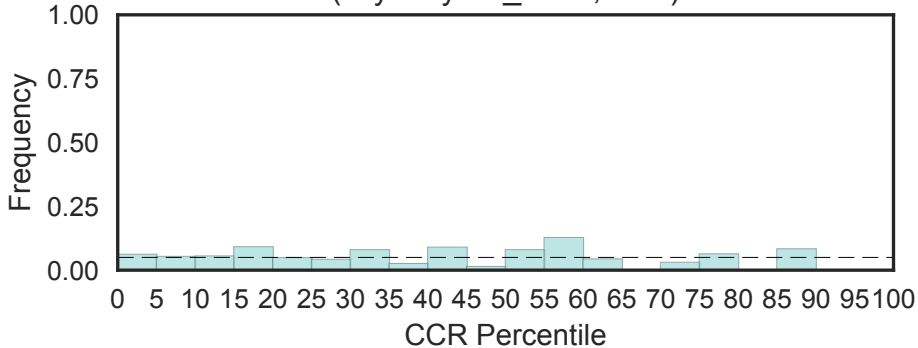

Fructose-bisphosphate aldolase class-I  
(Glycolytic, N=3)

Fisher's OR: 0; Bonferroni p-val: 1

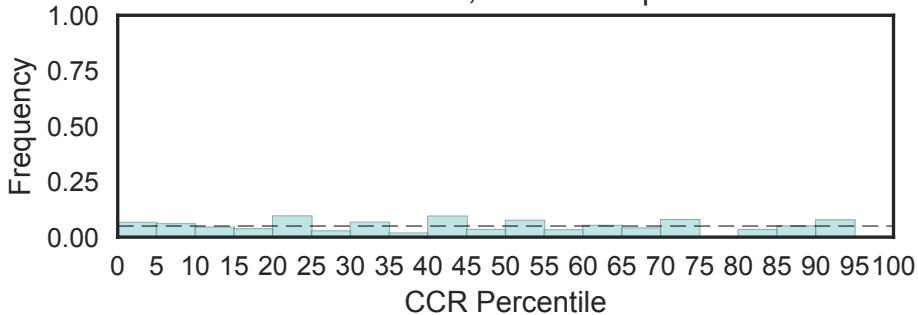

Glycophorin A  
(Glycophorin\_A, N=4)  
Fisher's OR: 0; Bonferroni p-val: 1

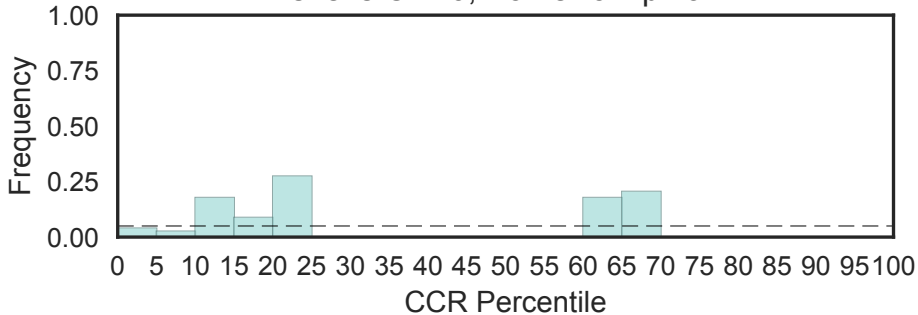

Glycosyl transferase family, helical bundle domain  
(Glycos\_trans\_3N, N=1)

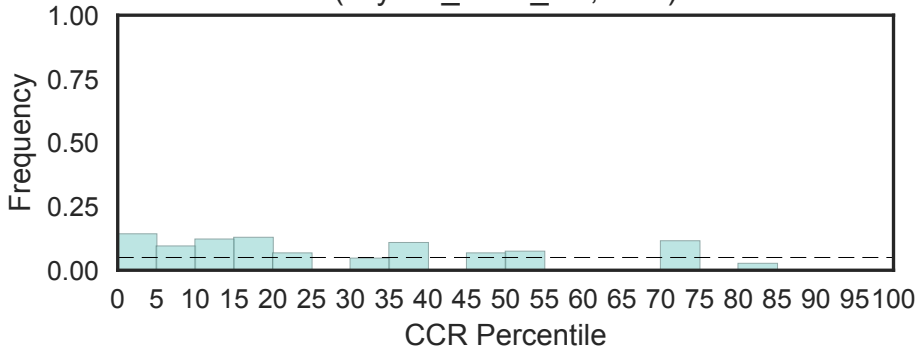

Glycosyl transferases group 1  
(Glycos\_transf\_1, N=5)  
Fisher's OR: 0; Bonferroni p-val: 1

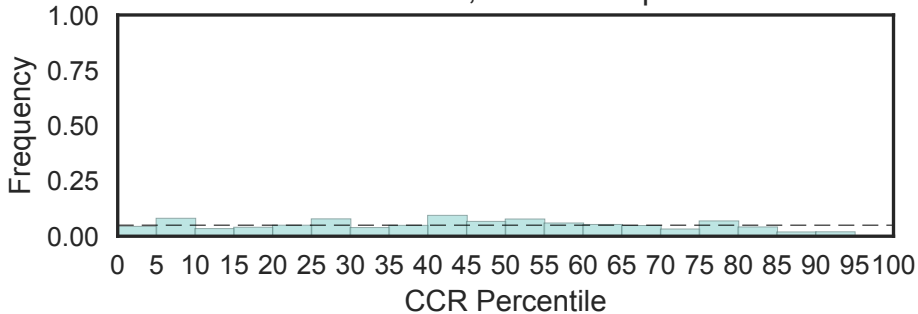

# Glycosyl transferase family 2

(Glycos\_transf\_2, N=28)

Fisher's OR: 0.306; Bonferroni p-val: 1

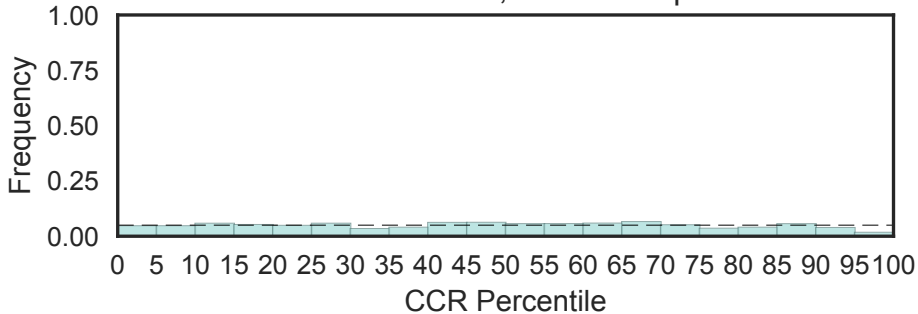



Glycosyl transferase family, a/b domain  
(Glycos\_transf\_3, N=1)

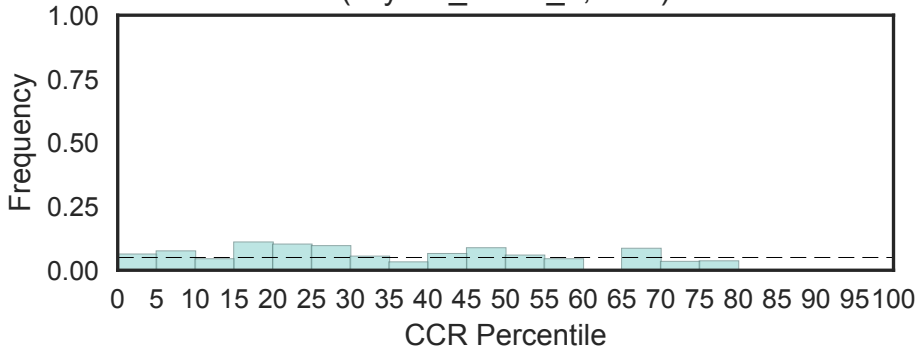

Glycosyl transferase family 4  
(Glycos\_transf\_4, N=1)

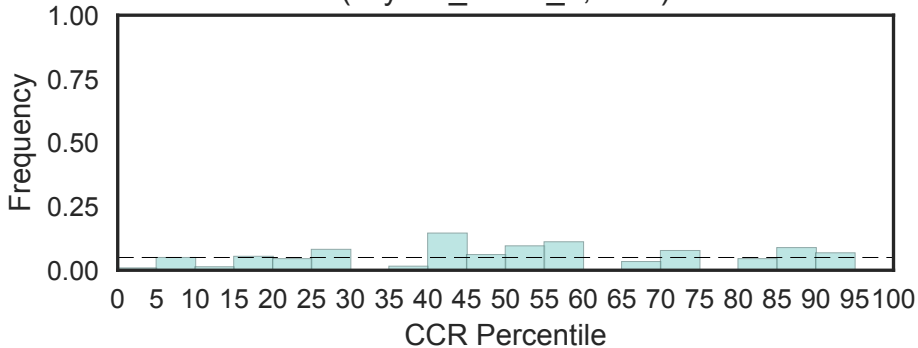

Glyoxalase/Bleomycin resistance protein/Dioxygenase superfamily  
(Glyoxalase, N=4)

Fisher's OR: 0; Bonferroni p-val: 1

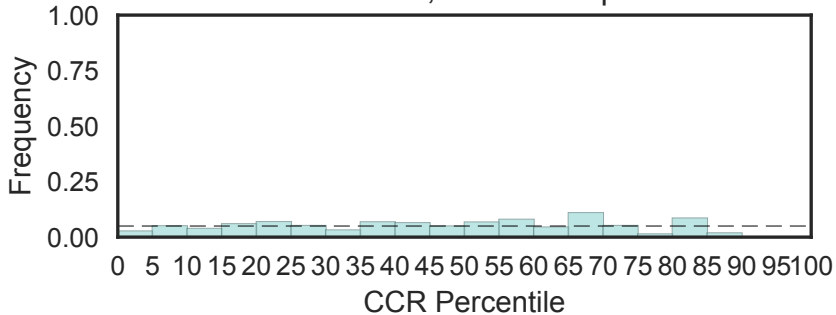

Glyoxalase-like domain  
(Glyoxalase\_3, N=1)

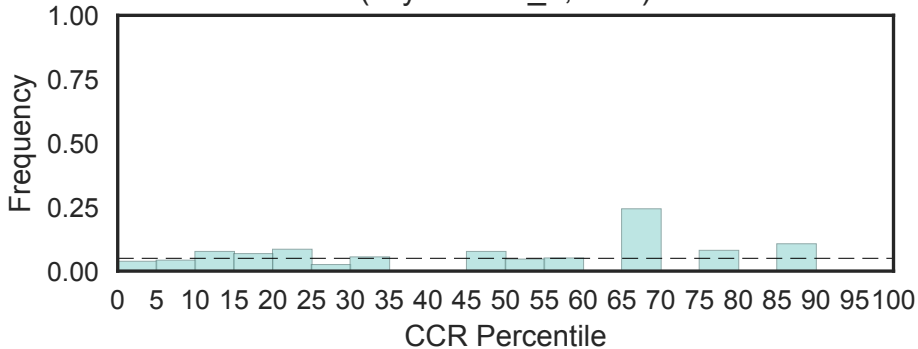

Glyoxalase/Bleomycin resistance protein/Dioxygenase superfamily  
(Glyoxalase\_4, N=3)

Fisher's OR: 0; Bonferroni p-val: 1

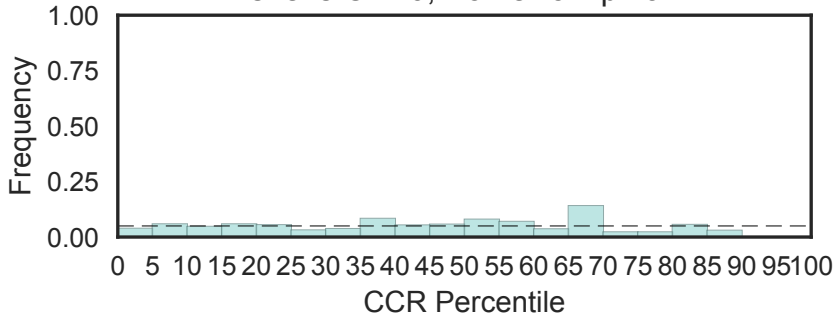

Glypican  
(Glypican, N=5)

Fisher's OR: 0.118; Bonferroni p-val: 1

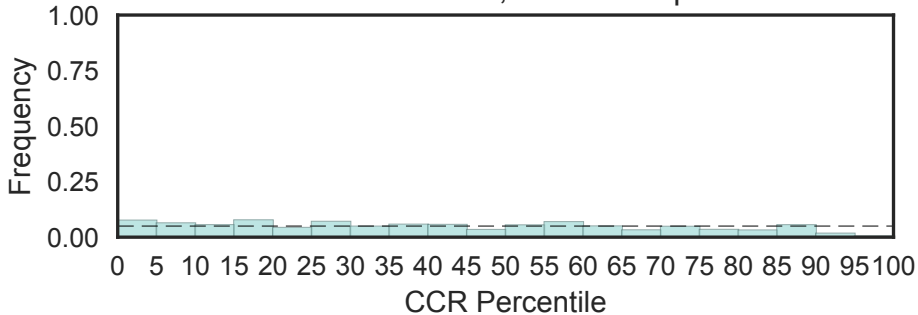

Gonadotropin hormone receptor transmembrane region  
(GnHR\_trans, N=1)

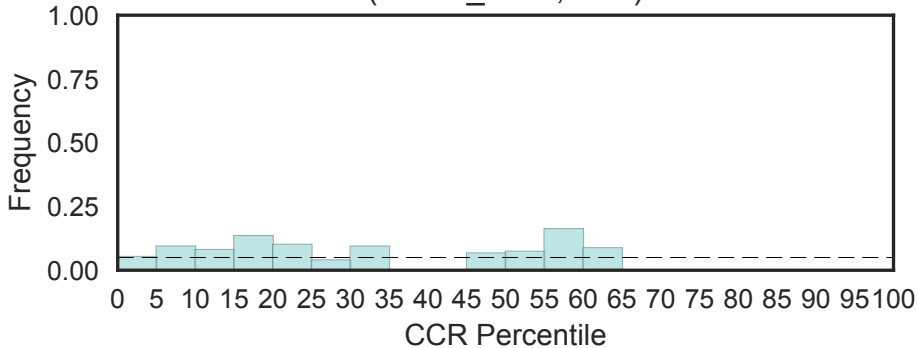

# Gonadotropin-releasing hormone (GnRH, N=2)

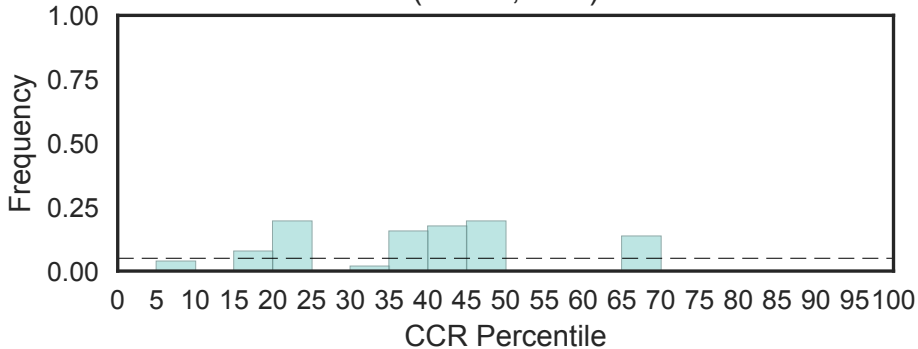



GoLoco motif  
(GoLoco, N=16)

Fisher's OR: 0; Bonferroni p-val: 1

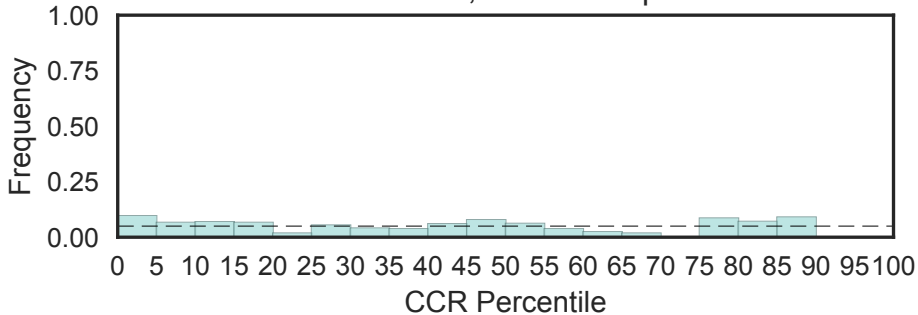

Golgin subfamily A member 5  
(Golgin\_A5, N=1)

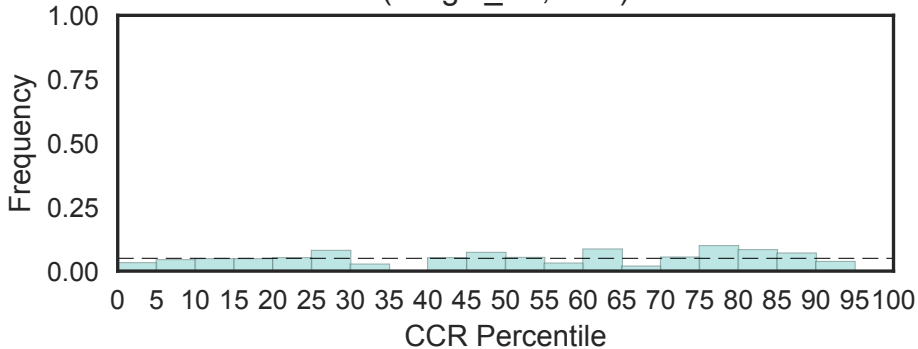

Got1/Sft2-like family  
(Got1, N=5)

Fisher's OR: 0; Bonferroni p-val: 1

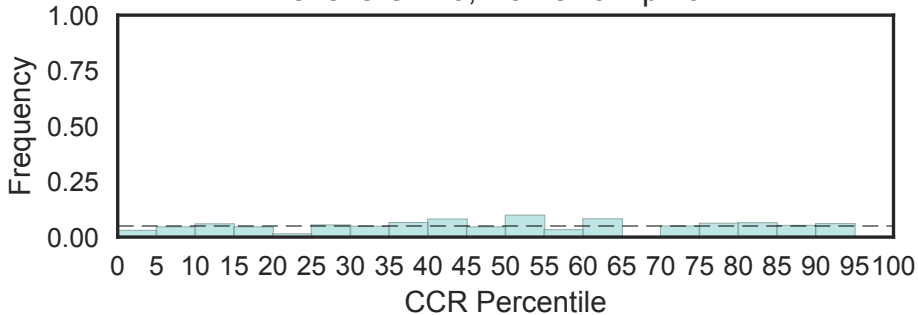

# Glyceraldehyde 3-phosphate dehydrogenase, C-terminal domain (Gp\_dh\_C, N=2)

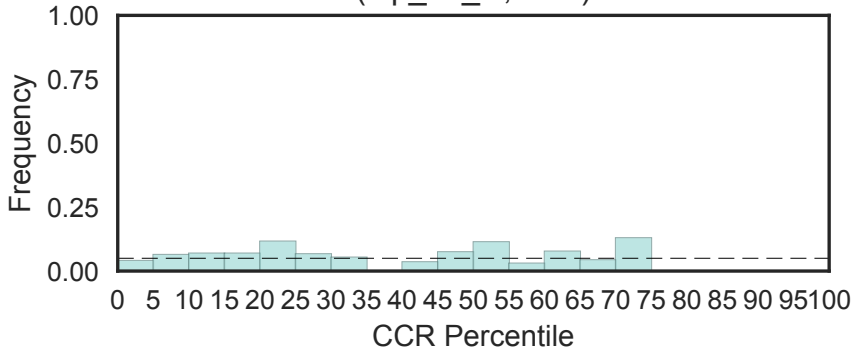

# Glyceraldehyde 3-phosphate dehydrogenase, NAD binding domain (Gp\_dh\_N, N=2)

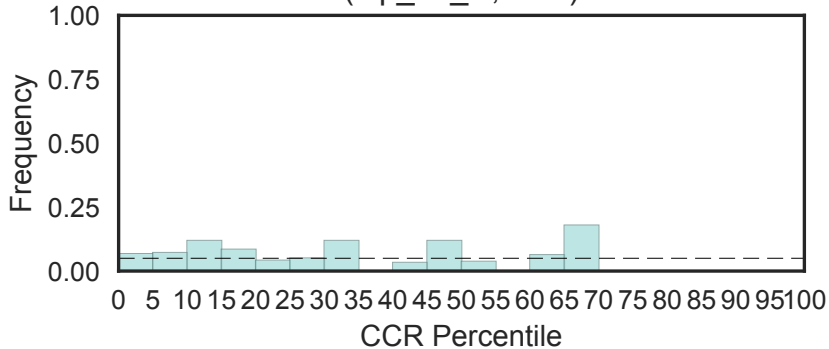

Rhodopsin-like GPCR transmembrane domain  
(GpcrRhopsn4, N=3)

Fisher's OR: 0; Bonferroni p-val: 1

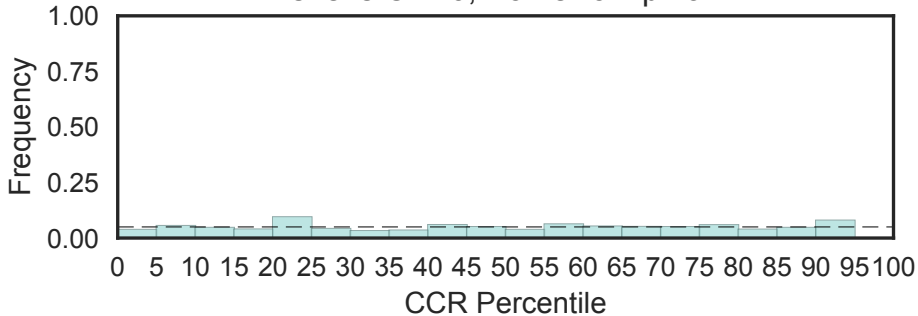

N-acetylglucosaminyl transferase component (Gpi1)  
(Gpi1, N=1)

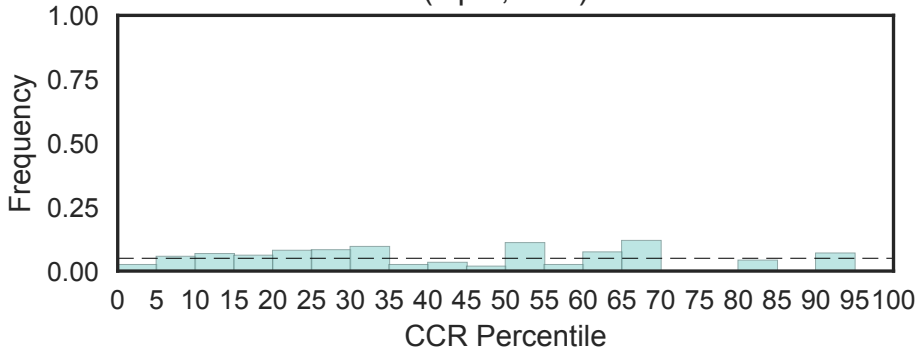

Gpi16 subunit, GPI transamidase component  
(Gpi16, N=1)

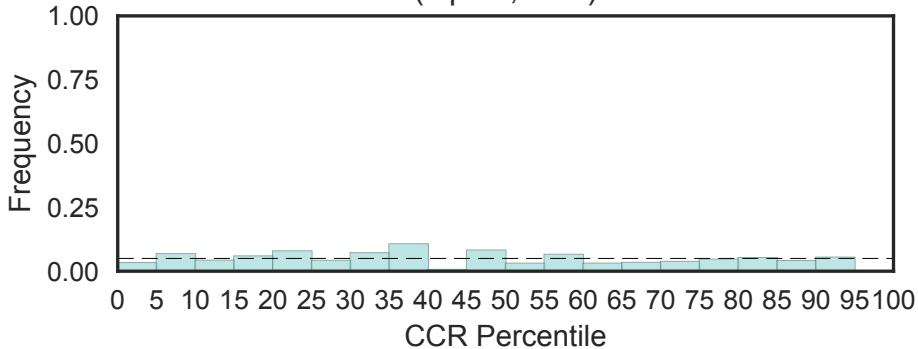



Granin (chromogranin or secretogranin)  
(Granin, N=4)

Fisher's OR: 0; Bonferroni p-val: 1

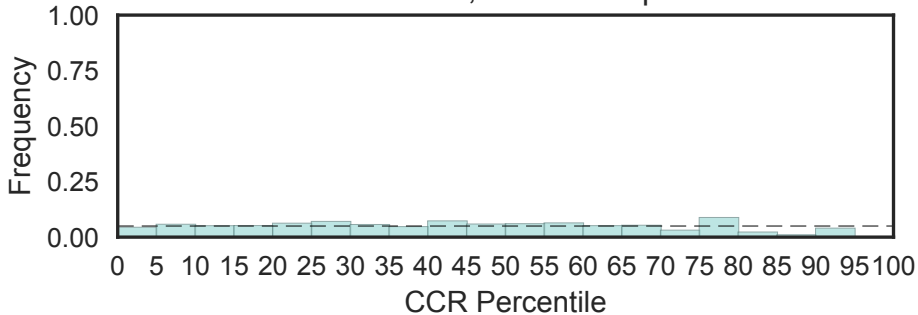

# Granulin

(Granulin, N=7)

Fisher's OR: 0; Bonferroni p-val: 1

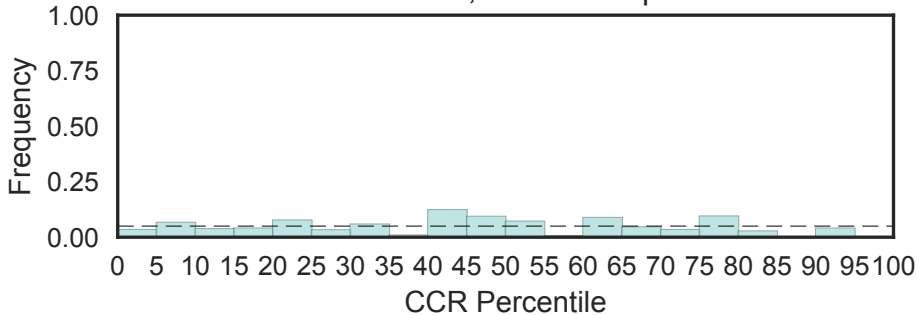

GrpE  
(GrpE, N=2)

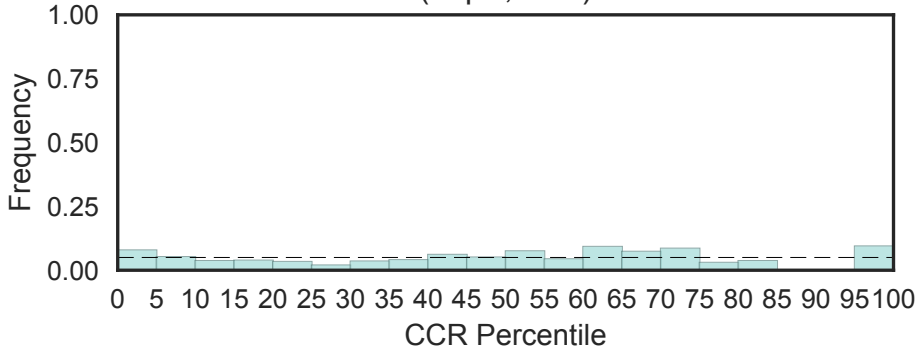

Gryzun, putative trafficking through Golgi  
(Gryzun, N=1)

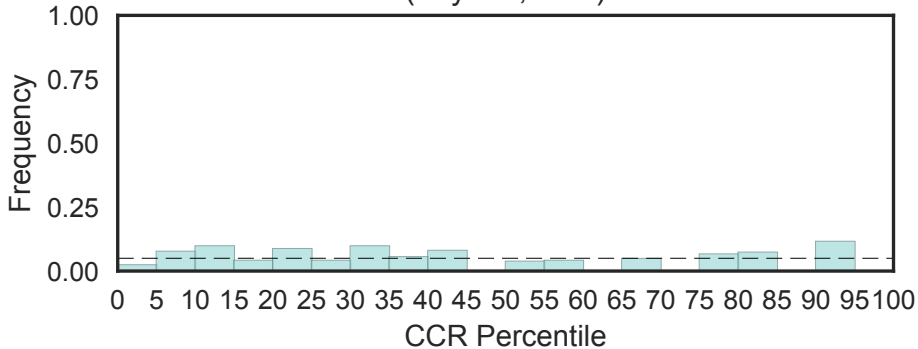

Gryzun, putative Golgi trafficking  
(Gryzun-like, N=1)

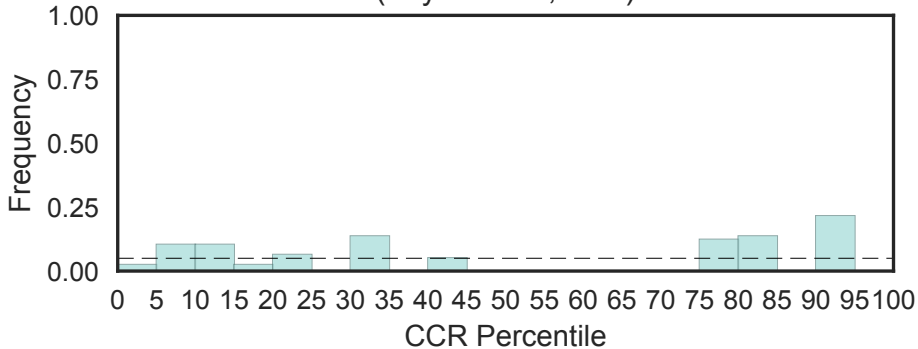

Gtr1/RagA G protein conserved region  
(Gtr1\_RagA, N=61)

Fisher's OR: 4.17; Bonferroni p-val: 5.78e-19

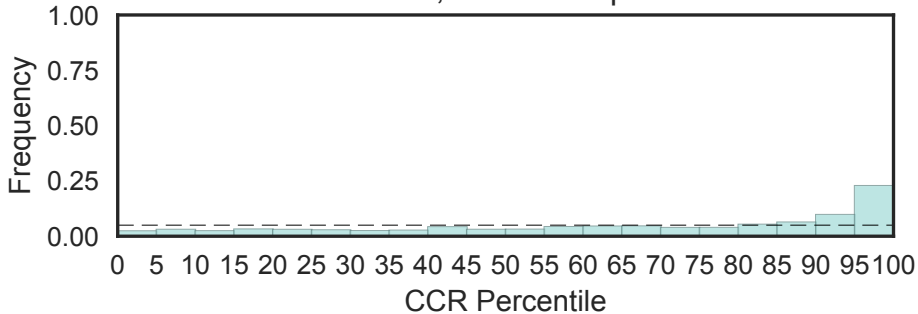

Adenylate and Guanylate cyclase catalytic domain  
(Guanylate\_cyc, N=28)

Fisher's OR: 1.83; Bonferroni p-val: 1

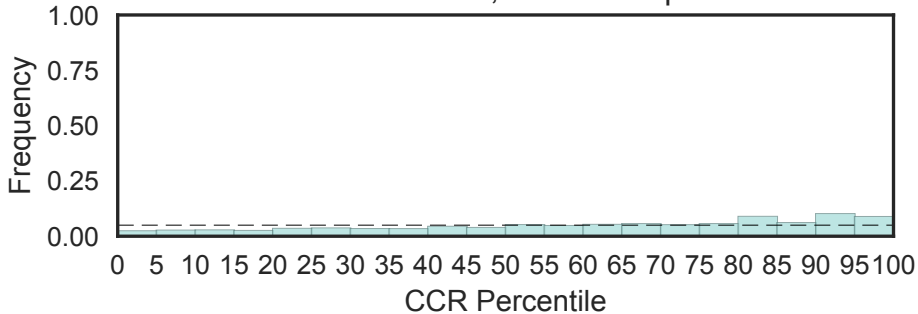

Guanylylate cyclase  
(Guanylate\_cyc\_2, N=1)

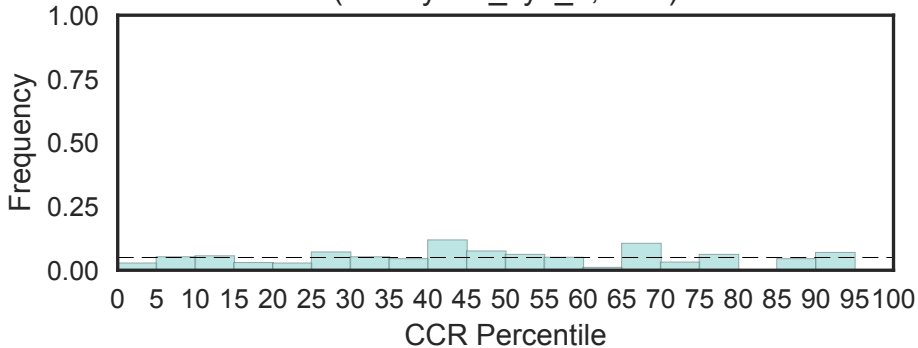



Guanylate kinase  
(Guanylate\_kin, N=24)

Fisher's OR: 0.371; Bonferroni p-val: 1

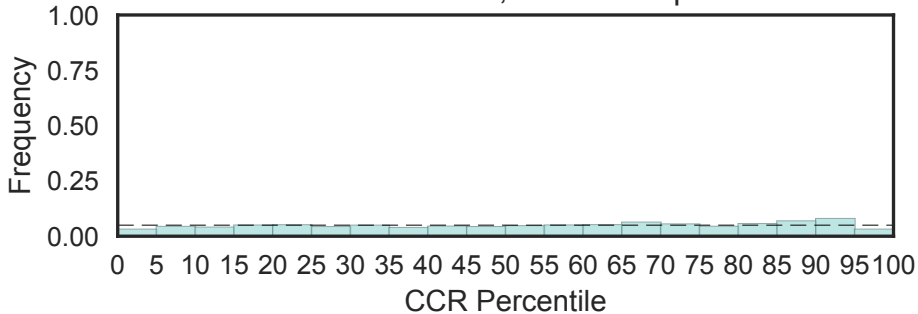

# Guanylin precursor (Guanylin, N=2)

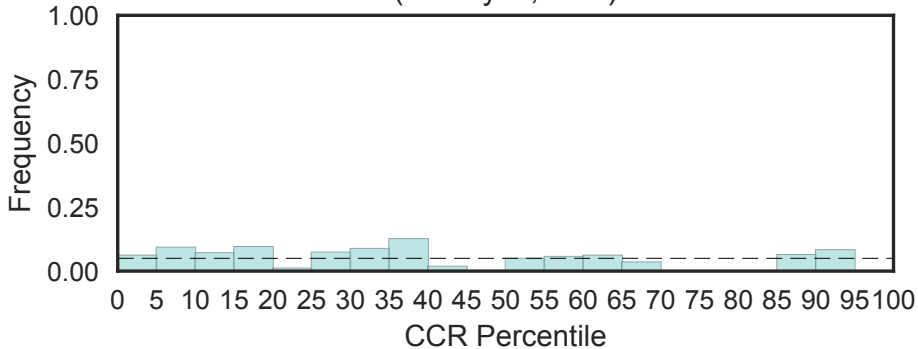

Gastric H<sup>+</sup>/K<sup>+</sup>-ATPase, N terminal domain  
(H-K\_ATPase\_N, N=1)

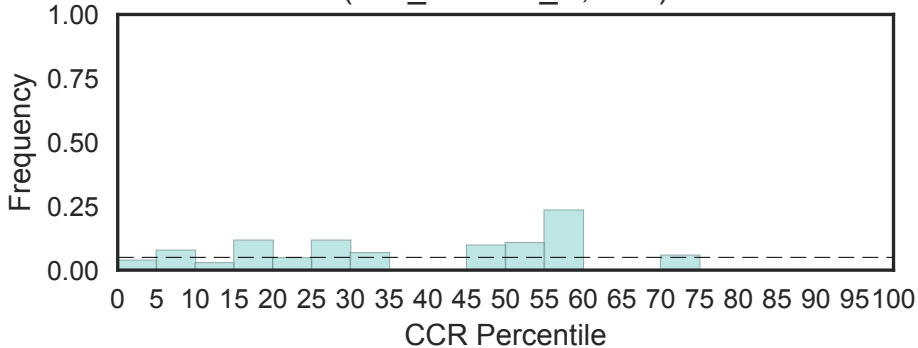

Formamidopyrimidine-DNA glycosylase H2TH domain  
(H2TH, N=3)

Fisher's OR: 0; Bonferroni p-val: 1

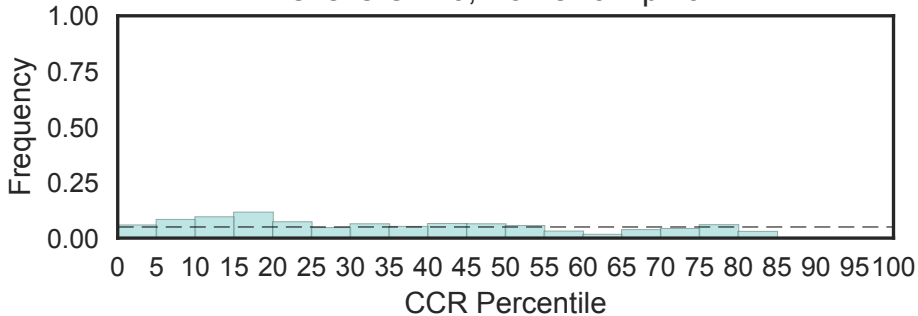

Helicase associated domain (HA2)  
(HA2, N=19)

Fisher's OR: 2.1; Bonferroni p-val: 1

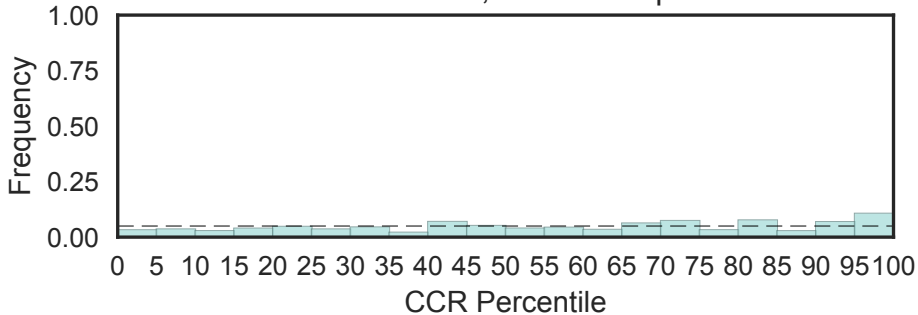

Hyaluronan / mRNA binding family  
(HABP4\_PA1-RBP1, N=20)  
Fisher's OR: 2.33; Bonferroni p-val: 1

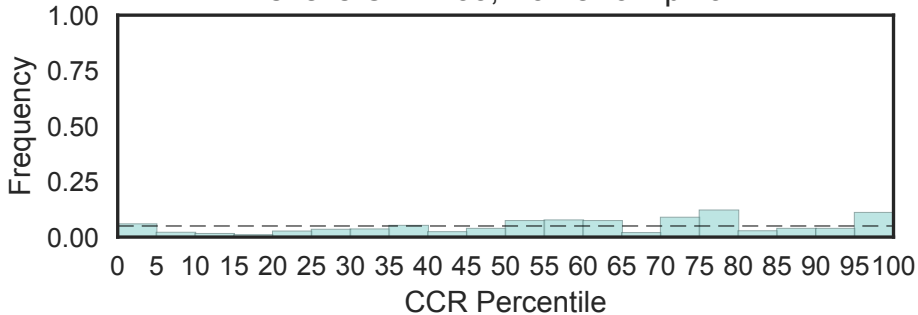

haloacid dehalogenase-like hydrolase  
(HAD, N=3)

Fisher's OR: 0; Bonferroni p-val: 1

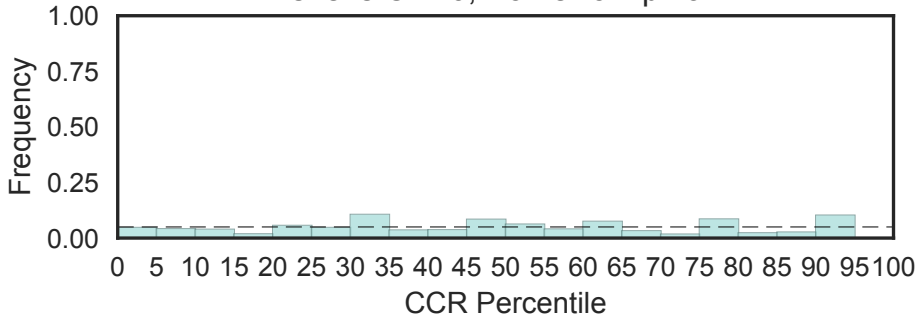

Haloacid dehalogenase-like hydrolase  
(HAD\_2, N=8)

Fisher's OR: 0; Bonferroni p-val: 1

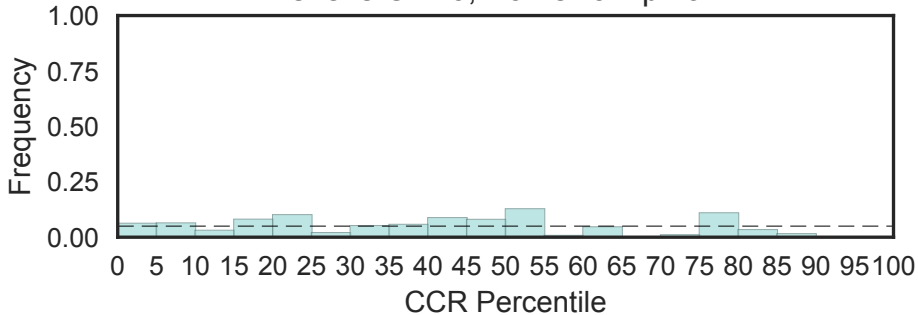



Hydroxyacylglutathione hydrolase C-terminus  
(HAGH\_C, N=3)

Fisher's OR: 0; Bonferroni p-val: 1

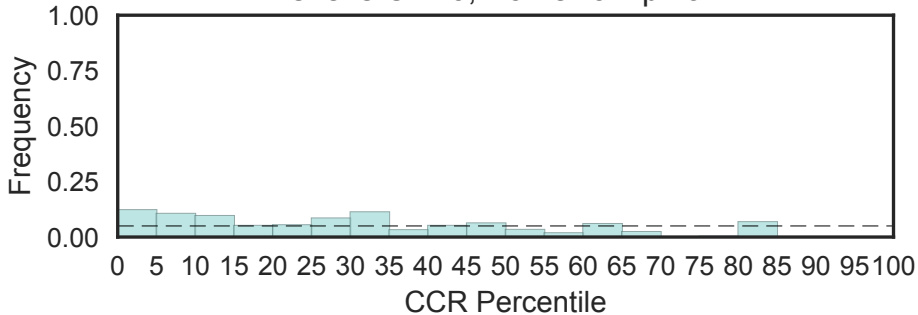

# HAND

(HAND, N=1)

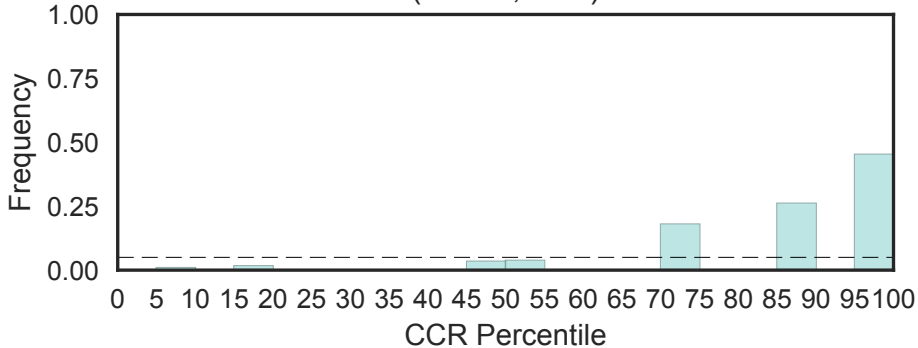

HAP1 N-terminal conserved region  
(HAP1\_N, N=4)

Fisher's OR: 0.763; Bonferroni p-val: 1

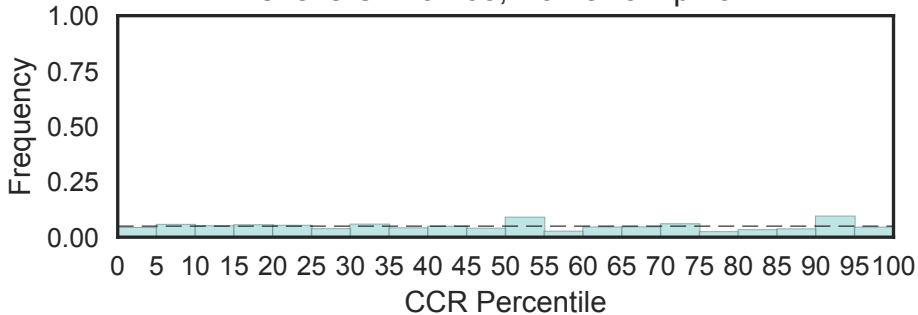

HB1, ASXL, restriction endonuclease HTH domain  
(HARE-HTH, N=3)

Fisher's OR: 15.4; Bonferroni p-val: 0.197

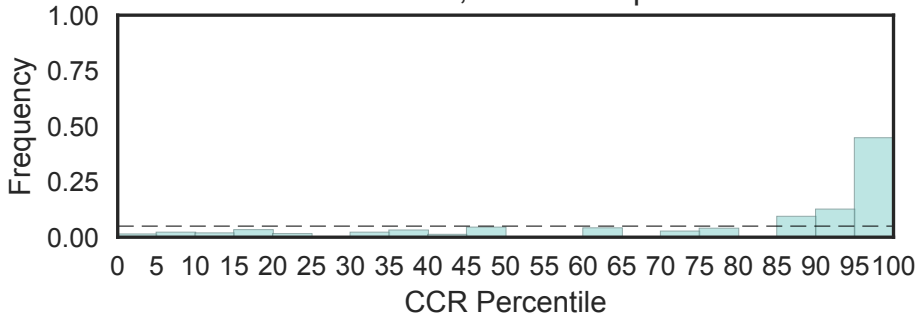

# HepA-related protein (HARP) (HARP, N=2)

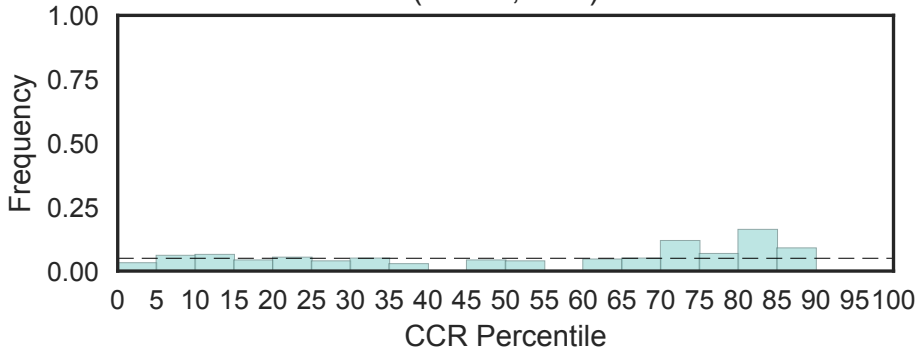

# HAT (Half-A-TPR) repeat (HAT, N=2)

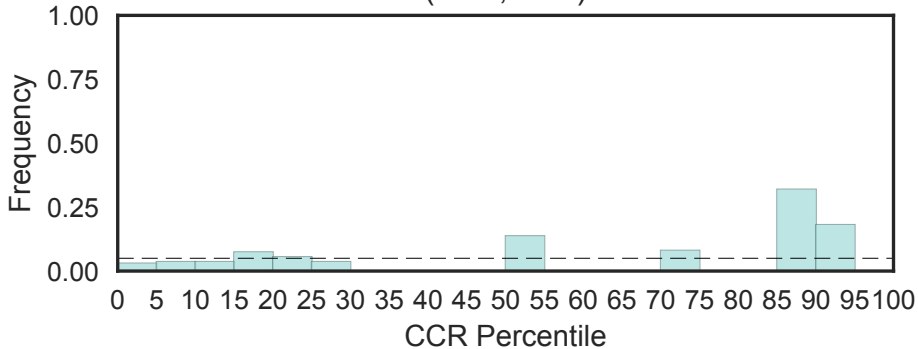

Histidine kinase-, DNA gyrase B-, and HSP90-like ATPase  
(HATPase\_c, N=15)

Fisher's OR: 2.17; Bonferroni p-val: 1

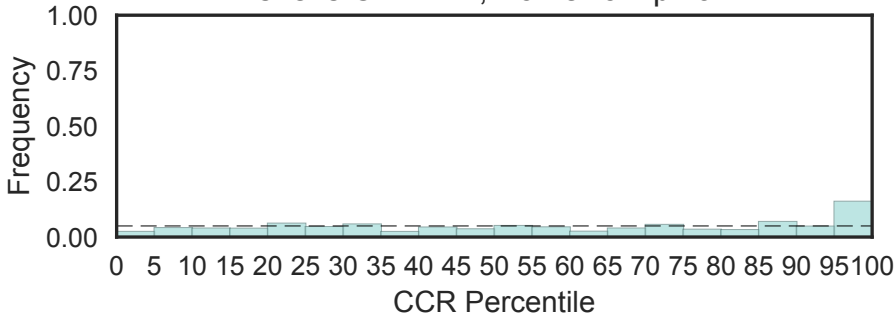

Histidine kinase-, DNA gyrase B-, and HSP90-like ATPase  
(HATPase\_c\_3, N=12)

Fisher's OR: 3.4; Bonferroni p-val: 1

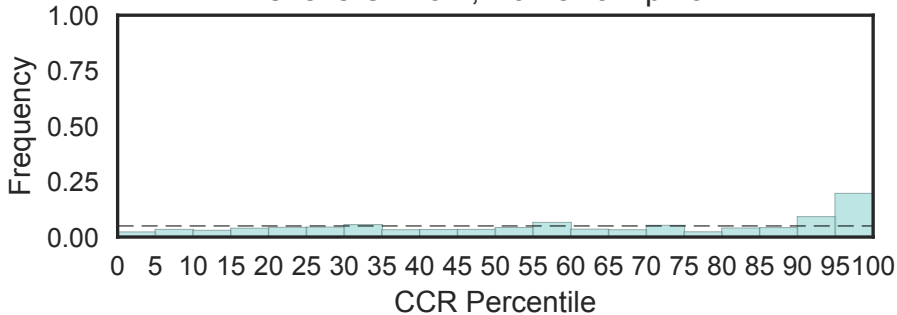



# Histone acetylation protein (HAT\_KAT11, N=2)

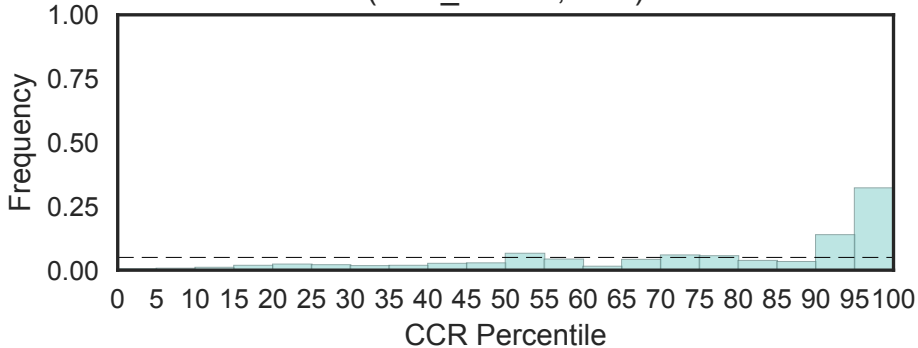

# HAUS augmin-like complex subunit 3 (HAUS-augmin3, N=1)

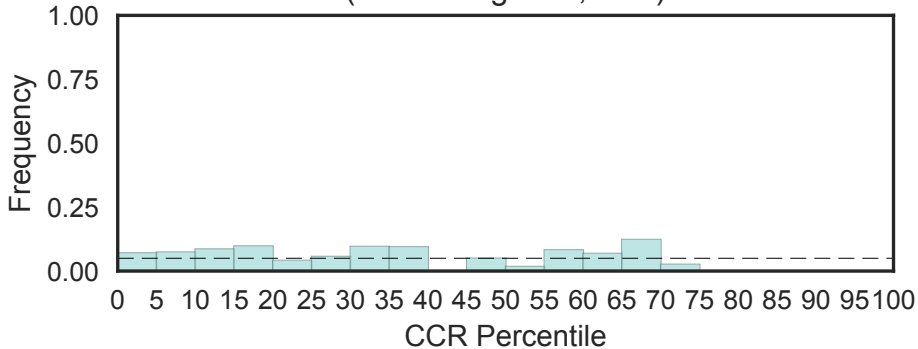

# HAUS augmin-like complex subunit 2 (HAUS2, N=1)

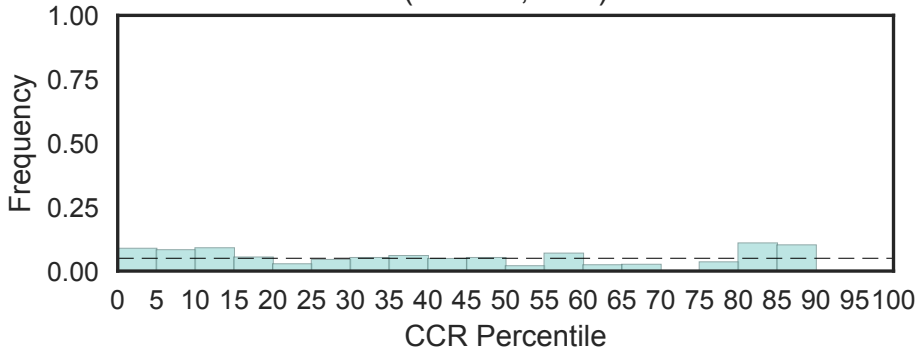

# HAUS augmin-like complex subunit 4 (HAUS4, N=2)

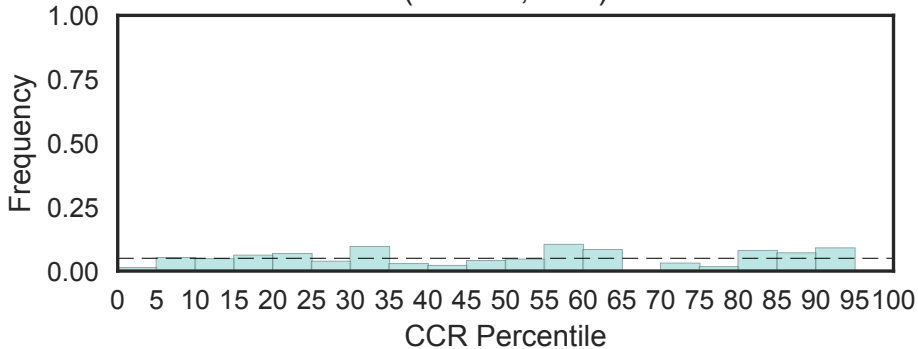

# HAUS augmin-like complex subunit 5 (HAUS5, N=1)

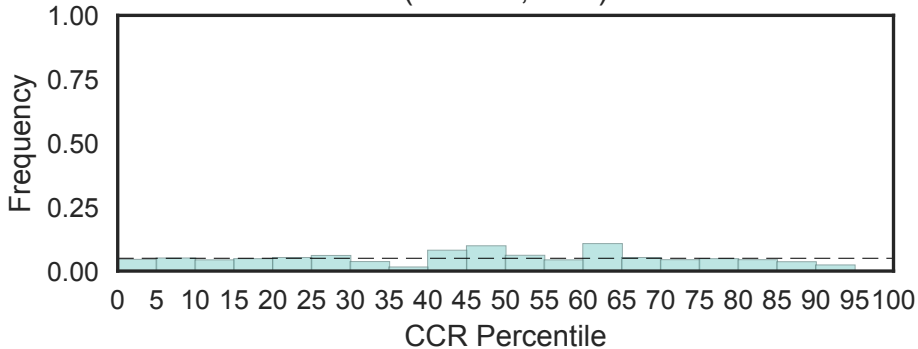

# HAUS augmin-like complex subunit 6 N-terminus (HAUS6\_N, N=1)

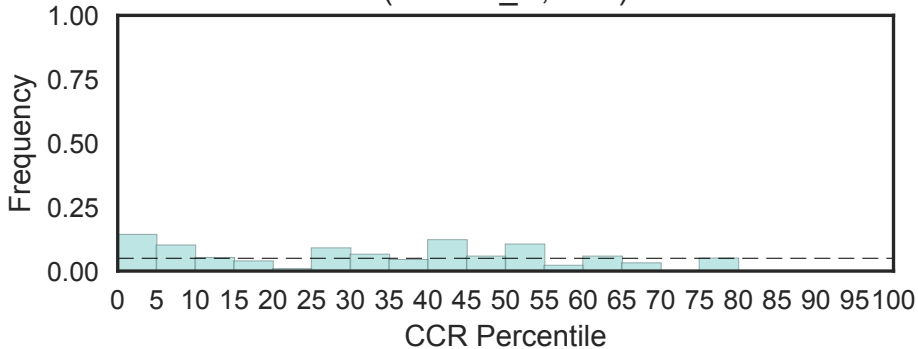

# Helical and beta-bridge domain (HBB, N=1)

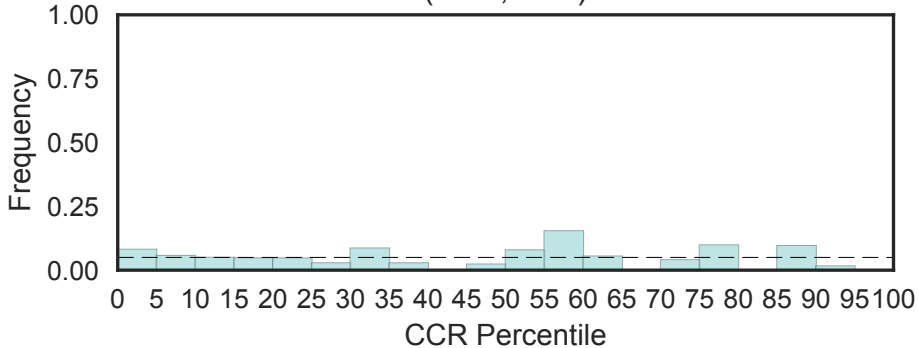

HBS1 N-terminus  
(HBS1\_N, N=1)

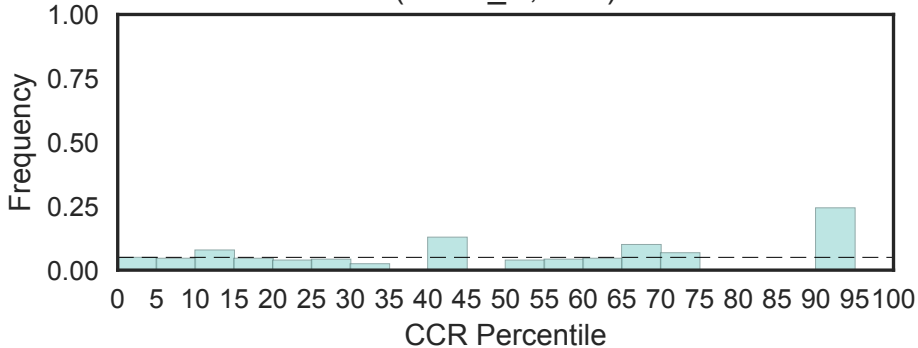



# HCNGP-like protein (HCNGP, N=1)

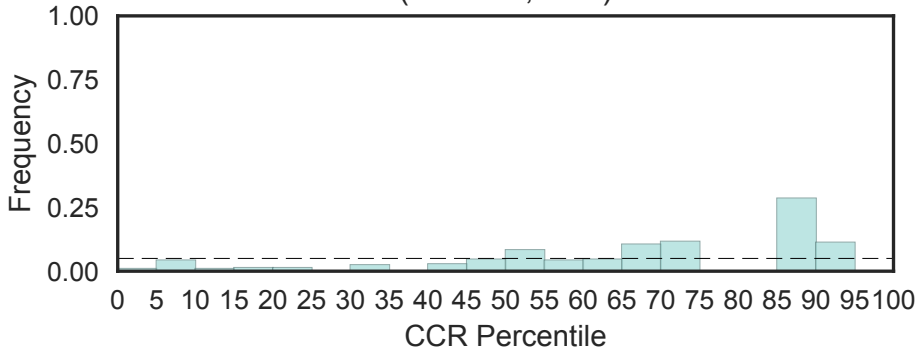

HCO3- transporter family  
(HCO3\_cotransp, N=13)  
Fisher's OR: 1.73; Bonferroni p-val: 1

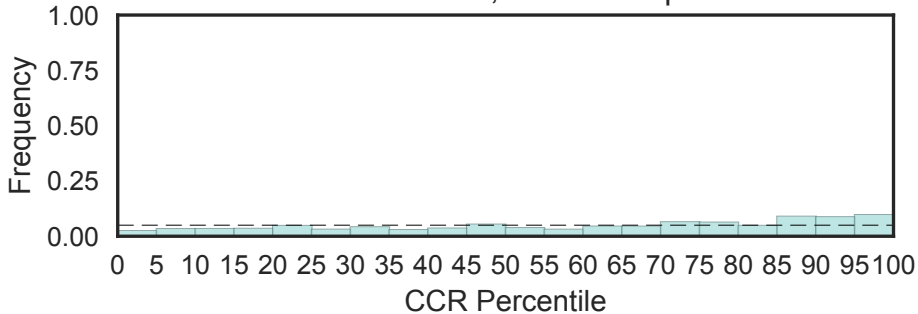

HD domain  
(HD, N=3)

Fisher's OR: 1.58; Bonferroni p-val: 1

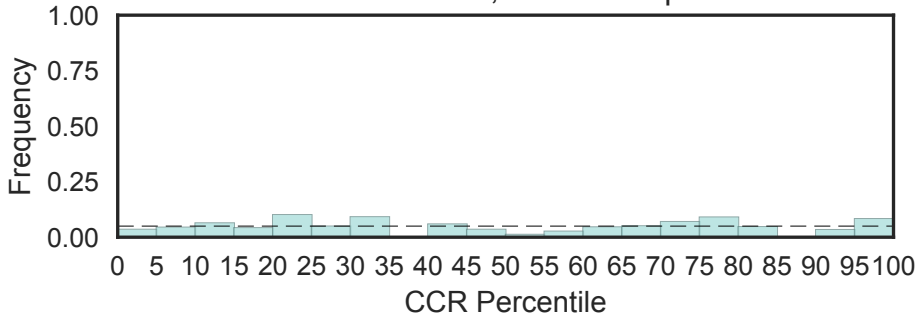

Class II histone deacetylase complex subunits 2 and 3  
(HDA2-3, N=4)

Fisher's OR: 11.9; Bonferroni p-val: 2.07e-06

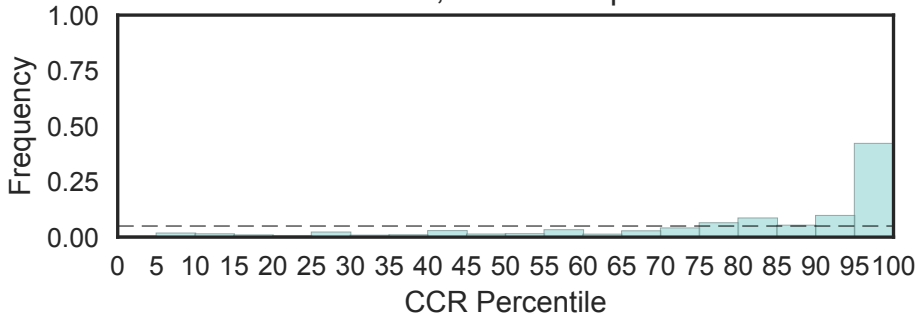

Glutamine rich N terminal domain of histone deacetylase 4  
(HDAC4\_Gln, N=3)

Fisher's OR: 5.9; Bonferroni p-val: 1

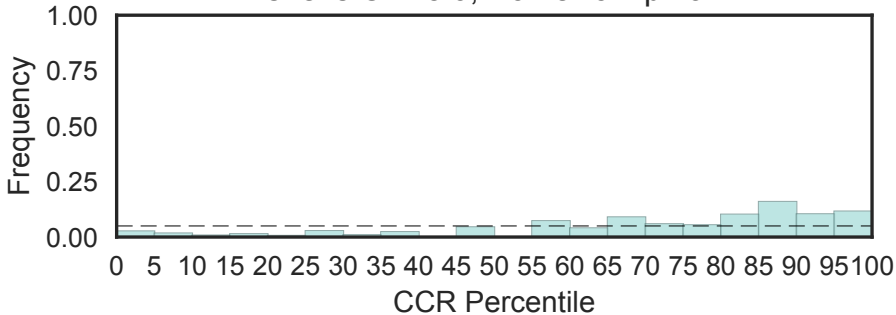

# Domain of unknown function with conserved HDNR motif (HDNR, N=2)

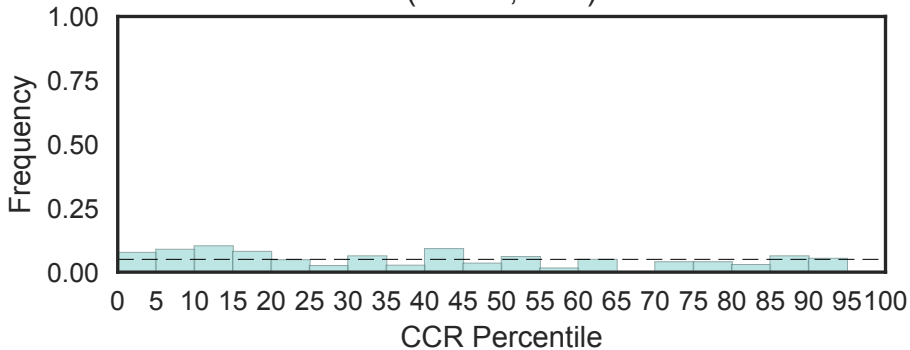

HD domain  
(HD\_3, N=1)

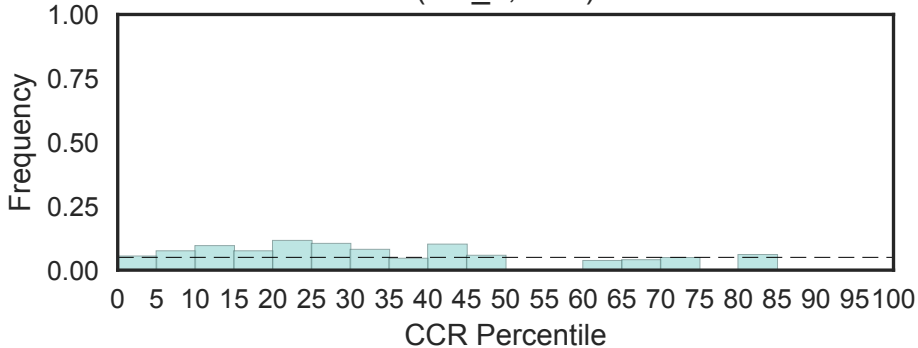

HD domain  
(HD\_4, N=1)

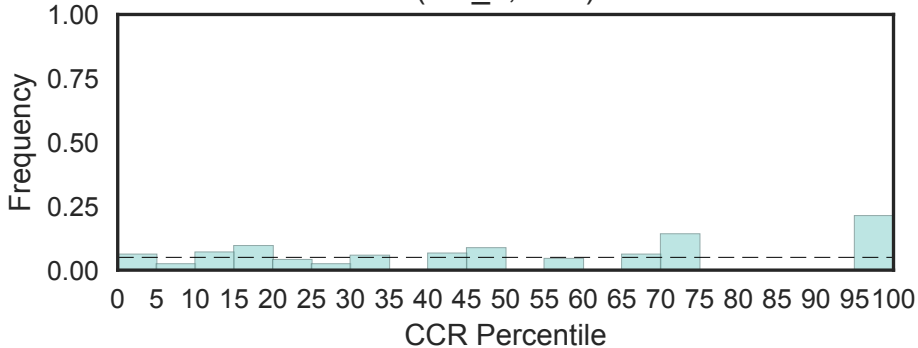



HEAT repeat  
(HEAT, N=30)

Fisher's OR: 3.99; Bonferroni p-val: 1

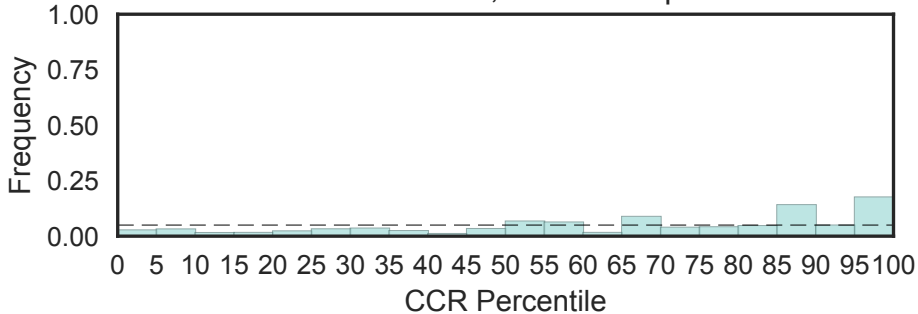

HEAT repeats  
(HEAT\_2, N=21)

Fisher's OR: 2.11; Bonferroni p-val: 1

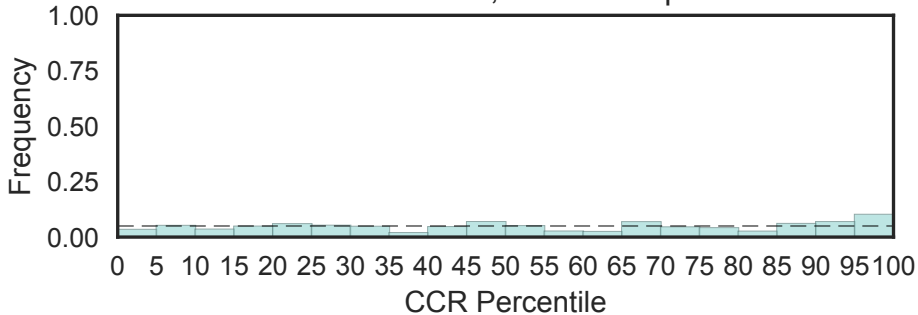

HEAT-like repeat  
(HEAT\_EZ, N=16)

Fisher's OR: 3.86; Bonferroni p-val: 1

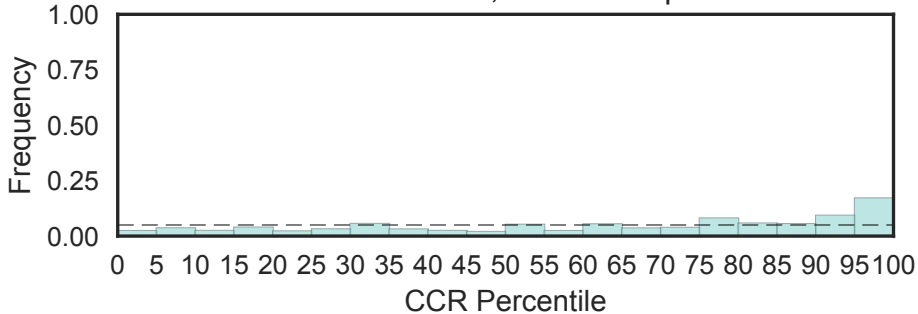

PBS lyase HEAT-like repeat  
(HEAT\_PBS, N=6)

Fisher's OR: 0; Bonferroni p-val: 1

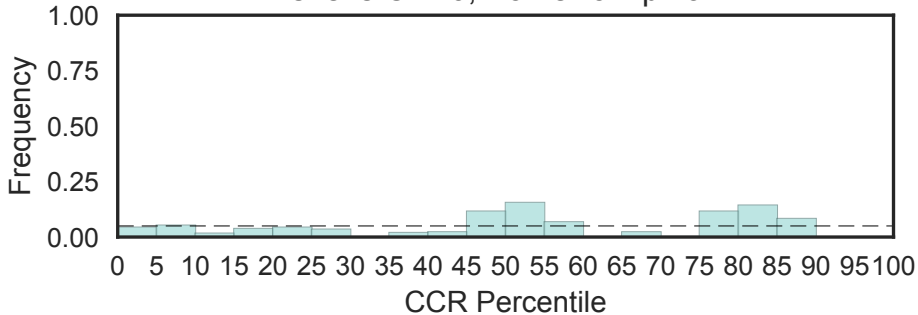

# Headcase protein family homologue (HECA, N=1)

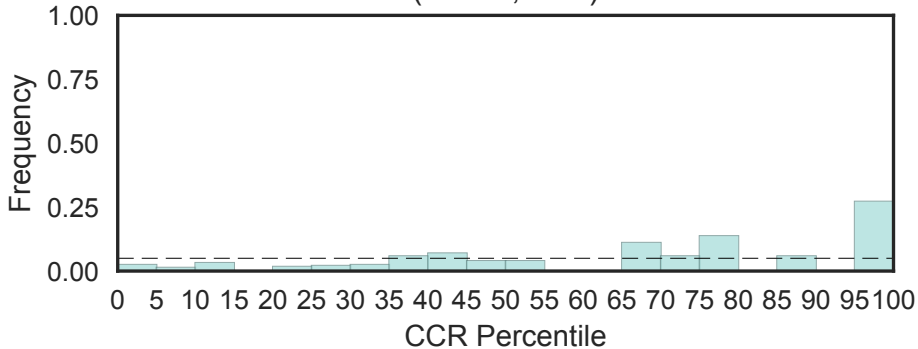

HECT-domain (ubiquitin-transferase)  
(HECT, N=28)

Fisher's OR: 3.49; Bonferroni p-val: 4.02e-14

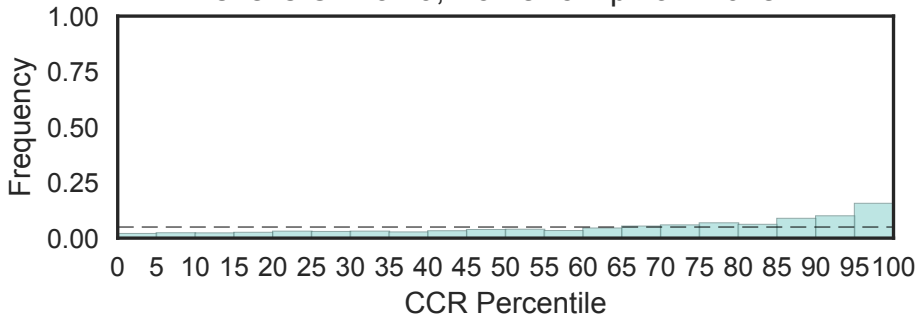

# HECT-like Ubiquitin-conjugating enzyme (E2)-binding (HECT\_2, N=1)

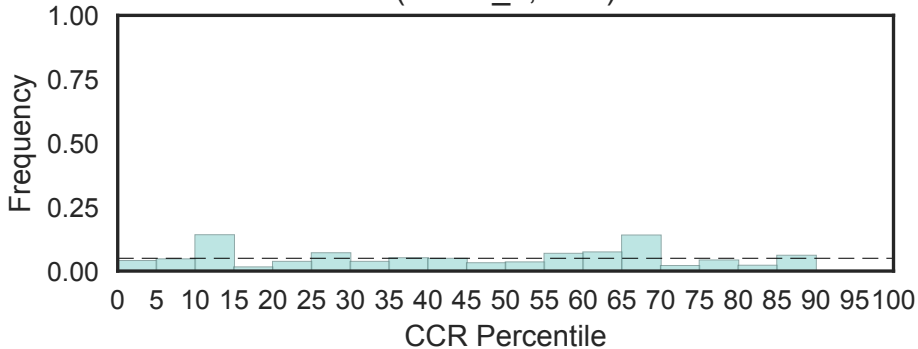

# N-terminal domain of E3 ubiquitin-protein ligase HECW1 and 2 (HECW\_N, N=2)

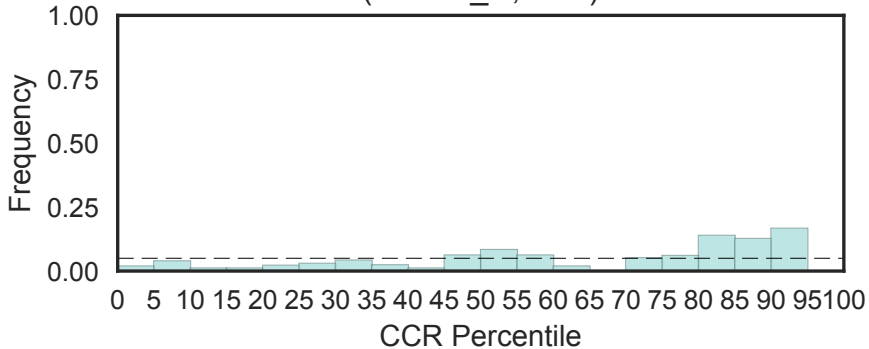



HELP motif  
(HELP, N=10)

Fisher's OR: 0.992; Bonferroni p-val: 1

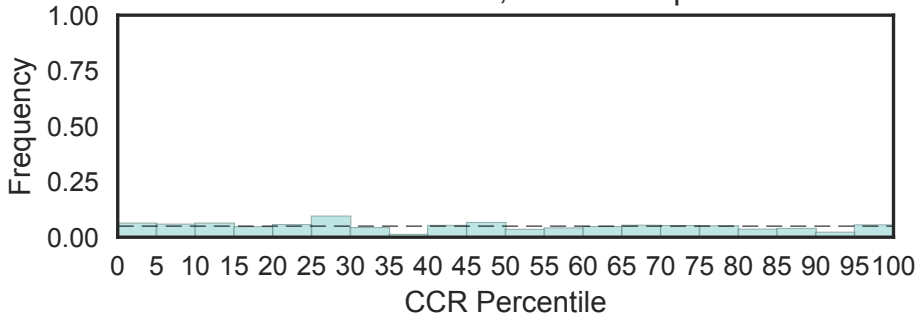

# Uroporphyrinogen-III synthase HemD (HEM4, N=1)

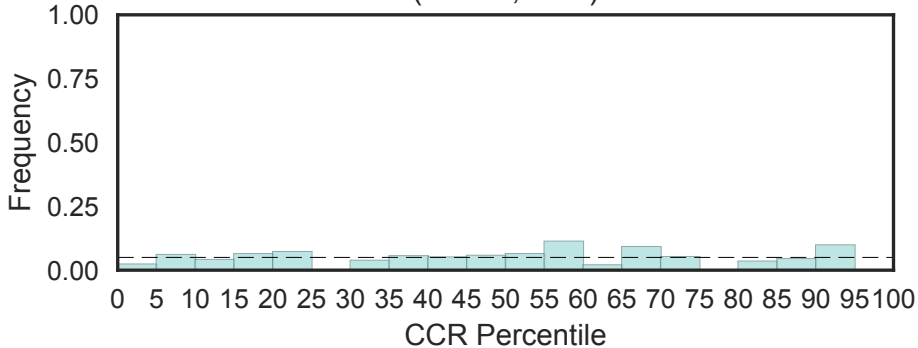

# HEPN domain (HEPN, N=1)

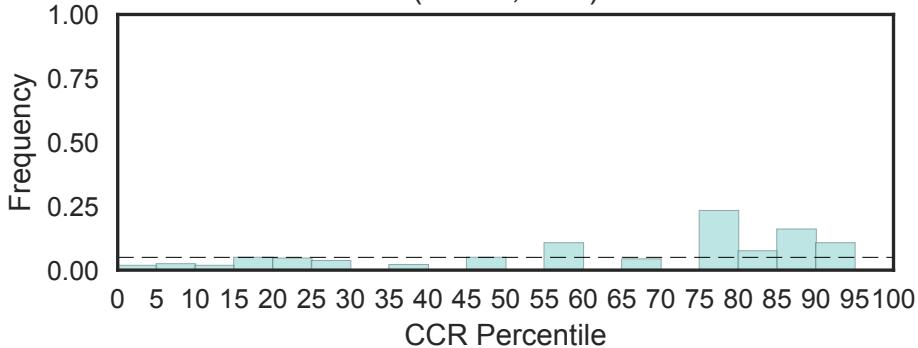

# Hexamethylene bis-acetamide-inducible protein (HEXIM, N=2)

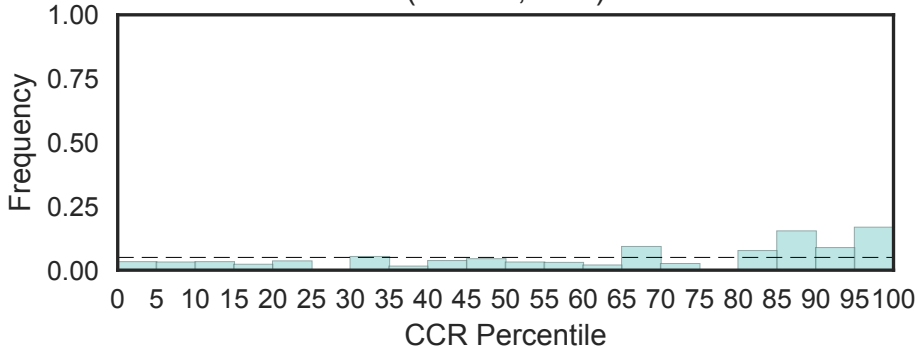

# Germinal center-associated lymphoma (HGAL, N=2)

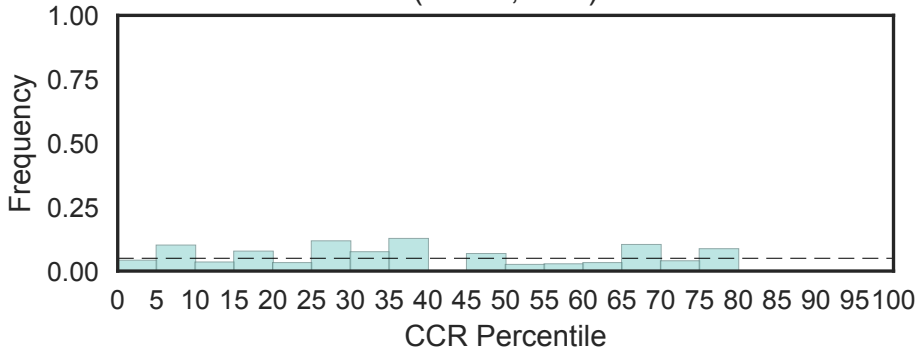

Anticodon binding domain  
(HGTP\_anticodon, N=9)

Fisher's OR: 0.3559; Bonferroni p-val: 1

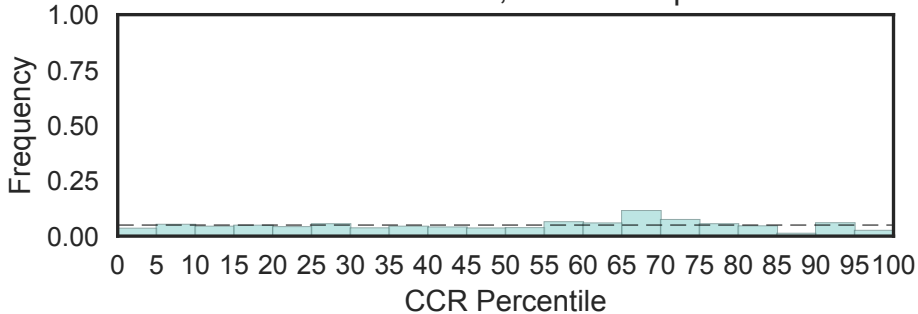

Anticodon binding domain of tRNAs  
(HGTP\_anticodon2, N=3)  
Fisher's OR: 0; Bonferroni p-val: 1

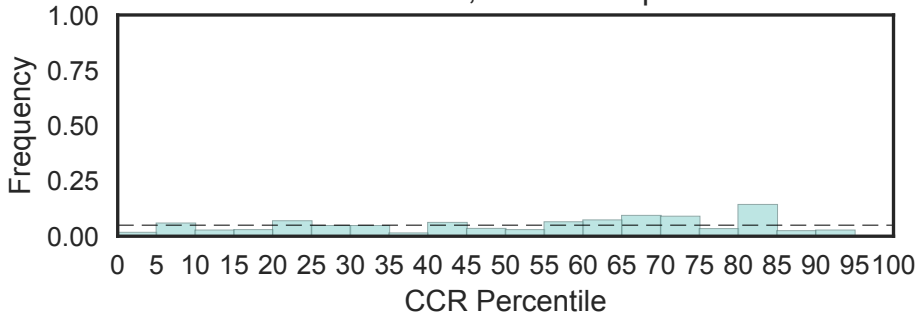

Helix-hairpin-helix motif  
(HHH, N=4)

Fisher's OR: 0; Bonferroni p-val: 1

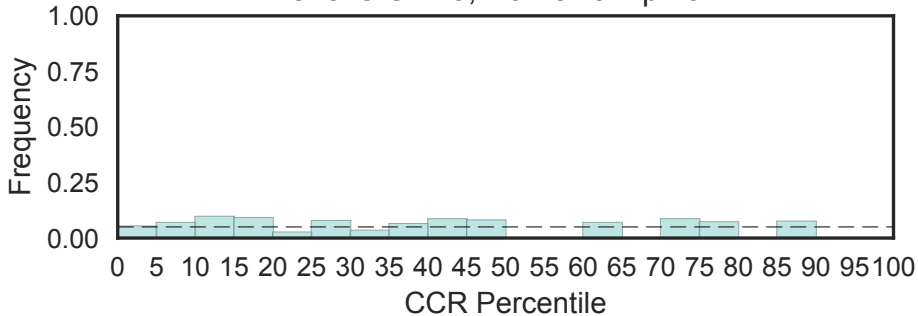



# Helix-hairpin-helix motif (HHH\_2, N=1)

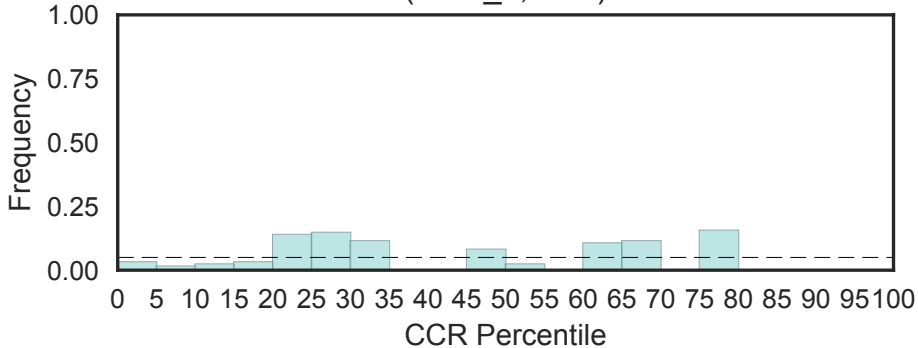

Helix-hairpin-helix motif  
(HHH\_3, N=6)

Fisher's OR: 0.702; Bonferroni p-val: 1

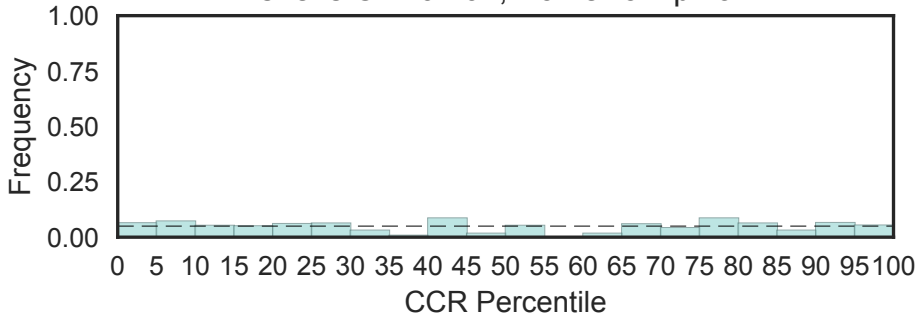

# Helix-hairpin-helix domain

(HHH\_5, N=5)

Fisher's OR: 0; Bonferroni p-val: 1

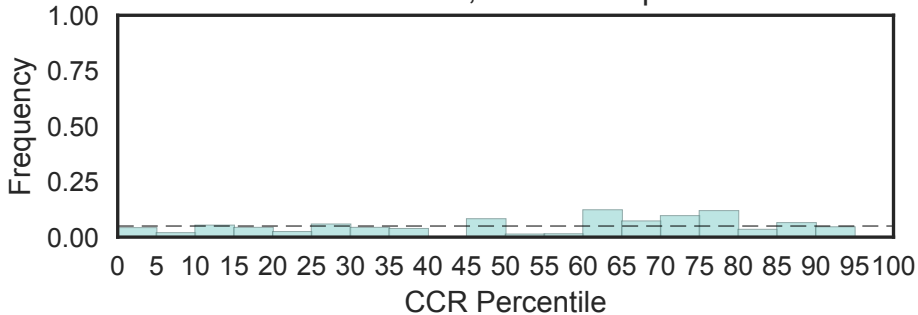

# Helix-hairpin-helix motif (HHH\_7, N=2)

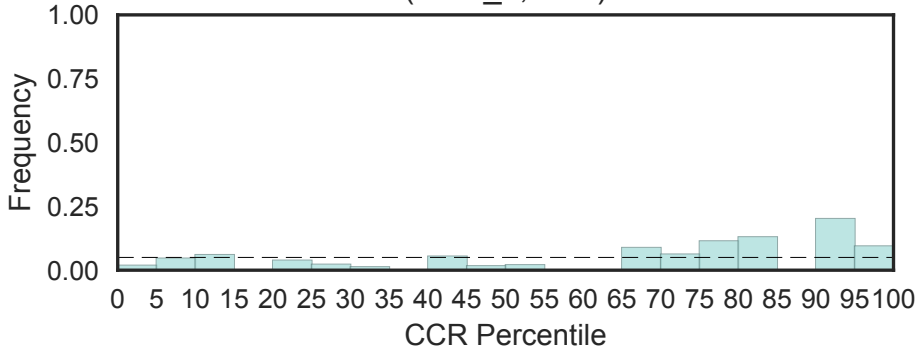

# Helix-hairpin-helix domain

(HHH\_8, N=4)

Fisher's OR: 0; Bonferroni p-val: 1

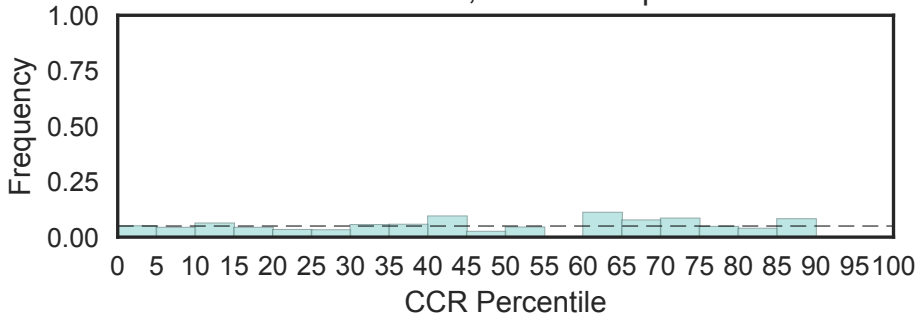

Hedgehog amino-terminal signalling domain  
(HH\_signal, N=3)

Fisher's OR: 4.43; Bonferroni p-val: 1

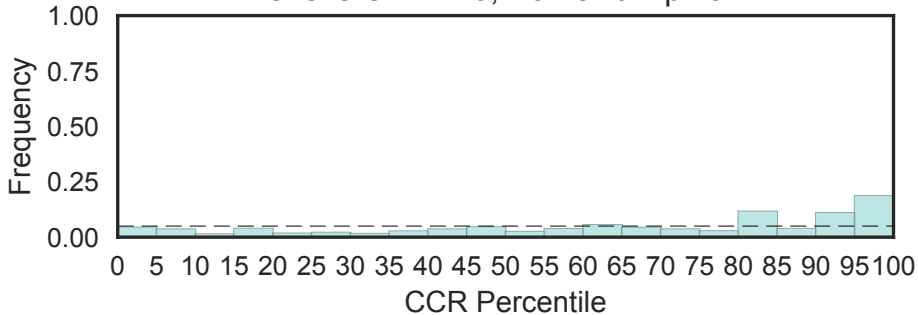

HI0933-like protein  
(HI0933\_like, N=2)

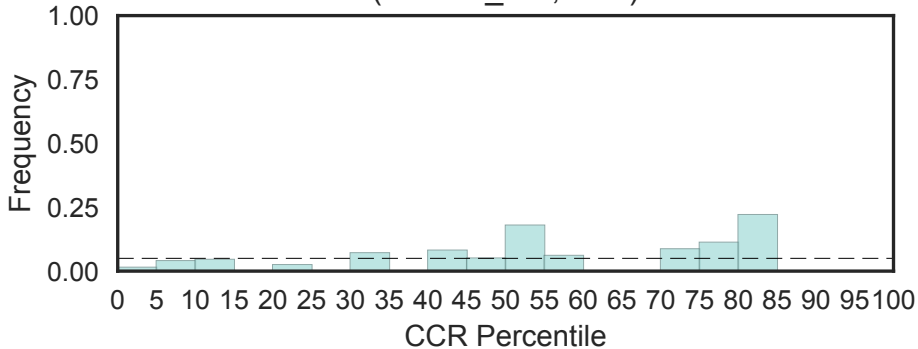

Hypoxia-inducible factor-1  
(HIF-1, N=3)

Fisher's OR: 4.32; Bonferroni p-val: 1

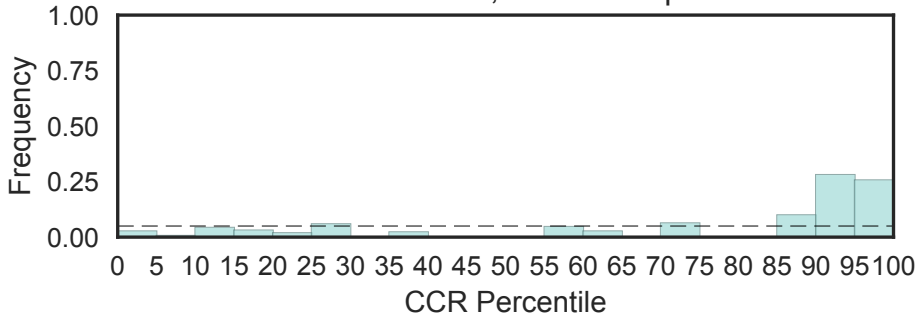



HIF-1 alpha C terminal transactivation domain  
(HIF-1a\_CTAD, N=2)

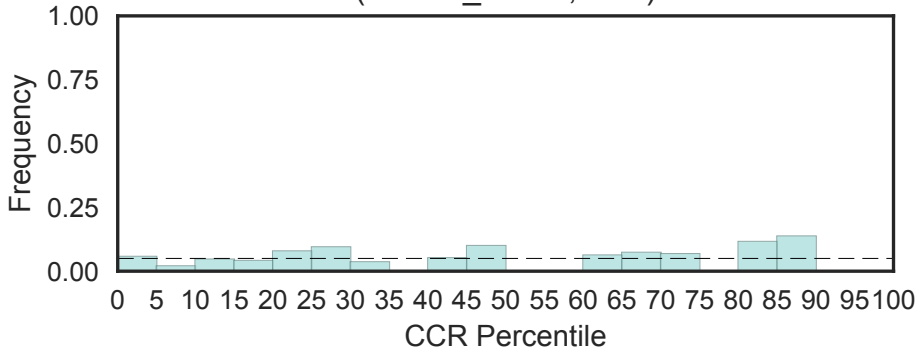

Hypoxia induced protein conserved region  
(HIG\_1\_N, N=4)

Fisher's OR: 0; Bonferroni p-val: 1

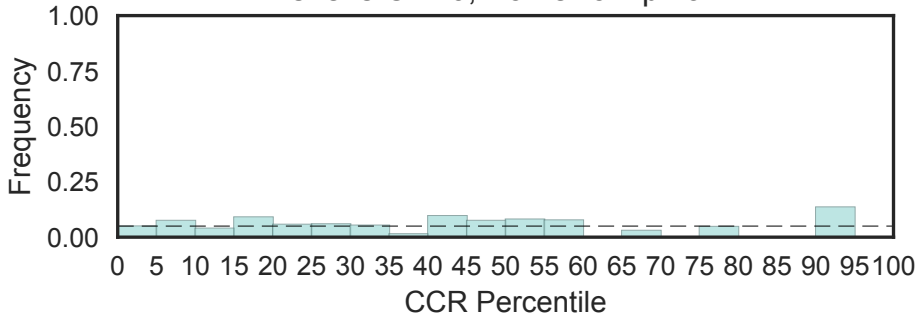

# Hypoxia-inducible lipid droplet-associated (HILPDA, N=1)

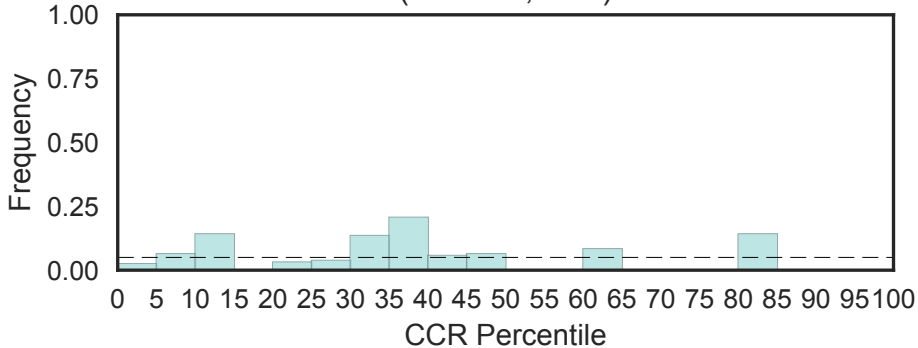

HIN-200/IF120x domain  
(HIN, N=5)

Fisher's OR: 0; Bonferroni p-val: 1

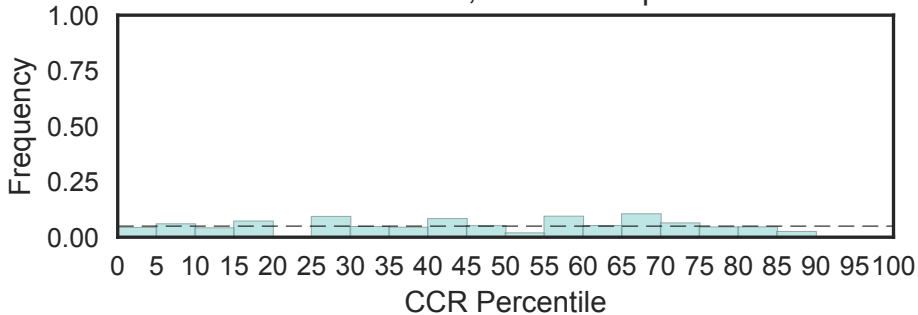

Clathrin-binding domain of Huntingtin-interacting protein 1  
(HIP1\_clath\_bdg, N=2)

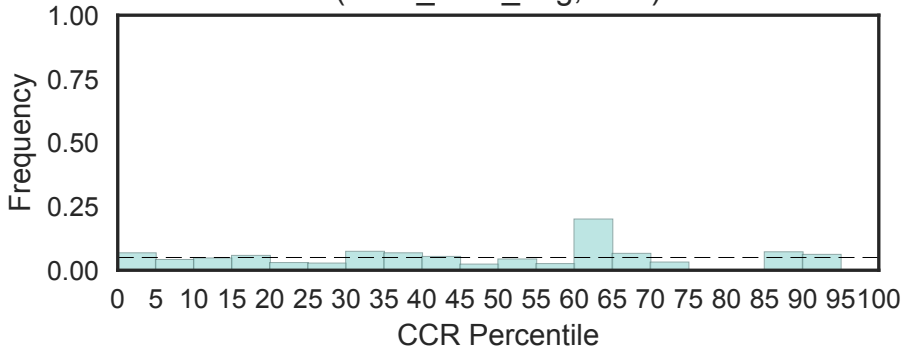

# HIRAN domain (HIRAN, N=1)

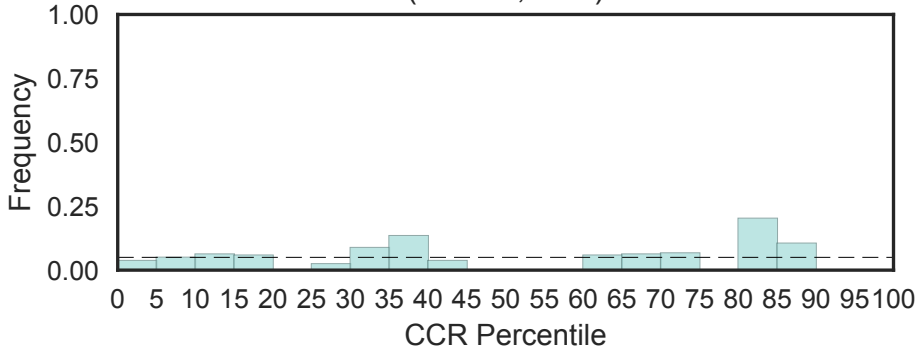

HIRA B motif  
(HIRA\_B, N=1)

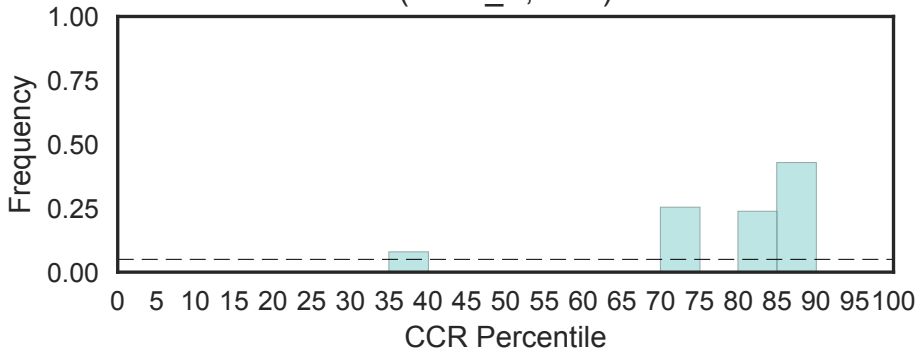

HIT domain  
(HIT, N=6)

Fisher's OR: 0; Bonferroni p-val: 1

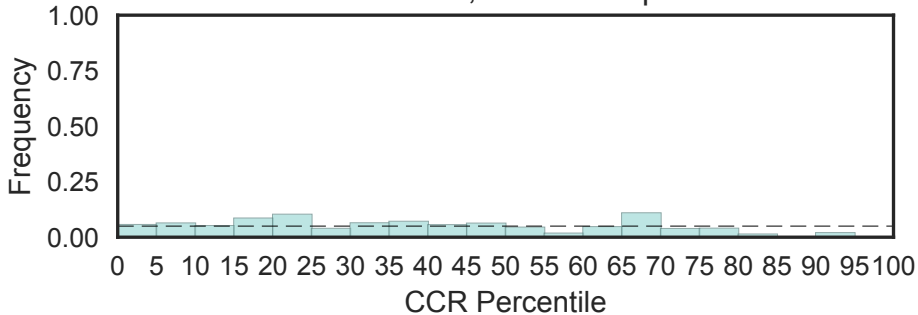



Holliday junction regulator protein family C-terminal repeat  
(HJURP\_C, N=5)

Fisher's OR: 2.33; Bonferroni p-val: 1

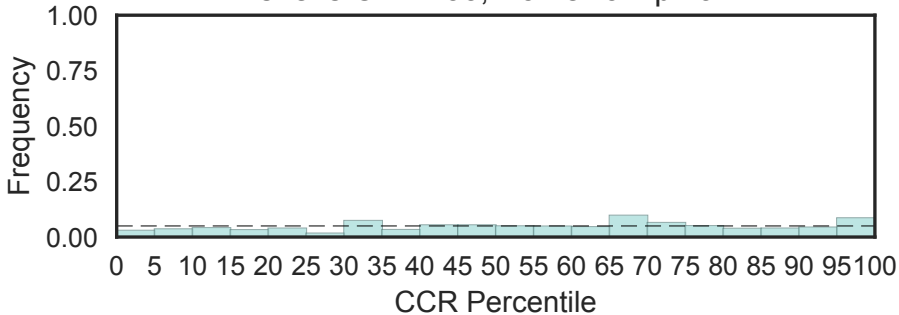

Holliday junction recognition protein-associated repeat  
(HJURP\_mid, N=1)

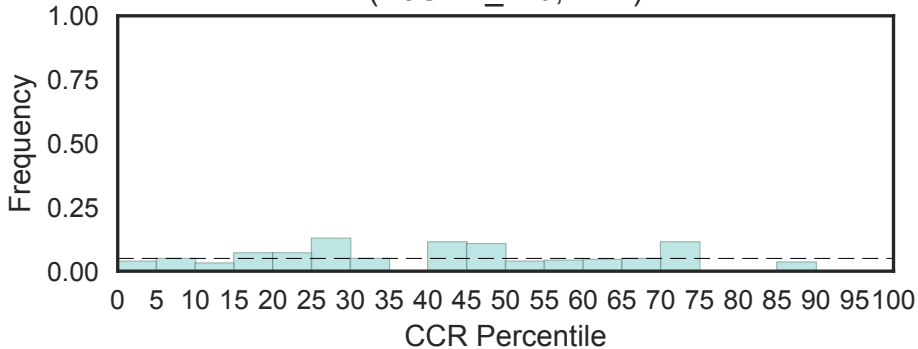

Helix-loop-helix DNA-binding domain  
(HLH, N=112)

Fisher's OR: 3.09; Bonferroni p-val: 1.8e-07

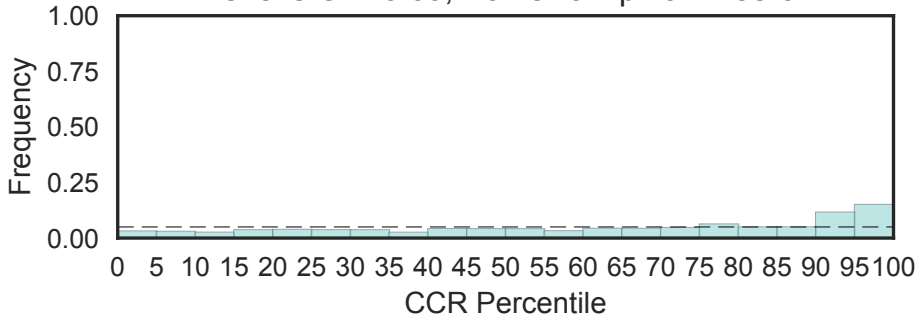

Heavy-metal-associated domain  
(HMA, N=8)

Fisher's OR: 0; Bonferroni p-val: 1

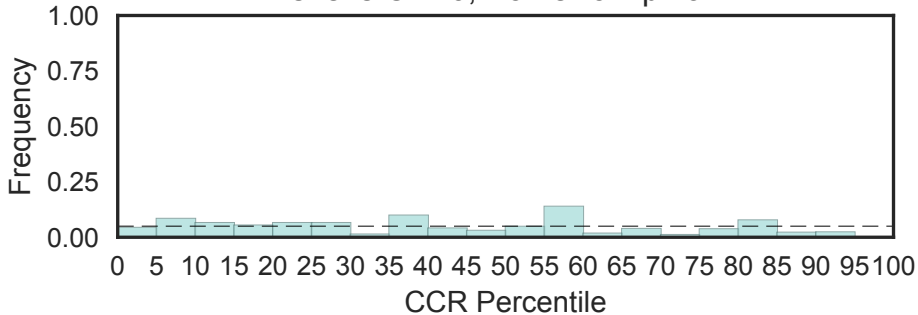

# Hydroxymethylglutaryl-coenzyme A reductase (HMG-CoA\_red, N=1)

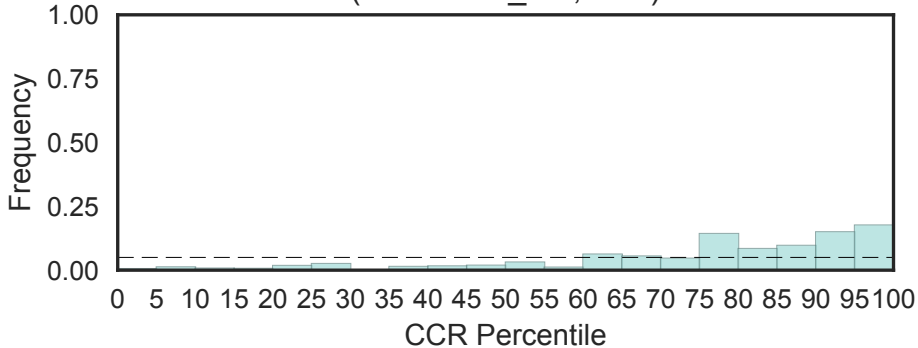

HMG14 and HMG17  
(HMG14\_17, N=4)

Fisher's OR: 0.772; Bonferroni p-val: 1

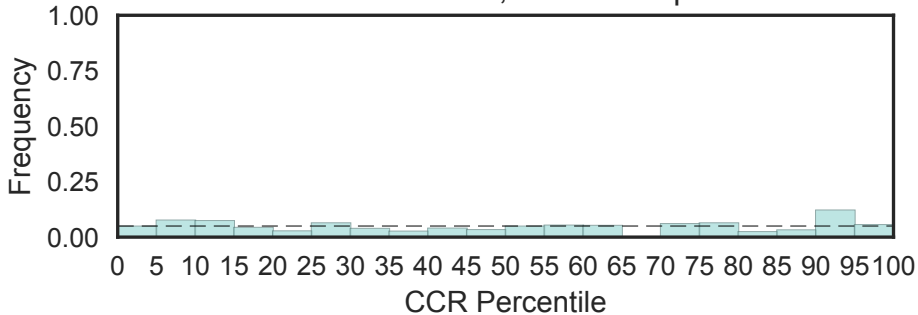

HMGL-like  
(HMGL-like, N=3)

Fisher's OR: 0; Bonferroni p-val: 1

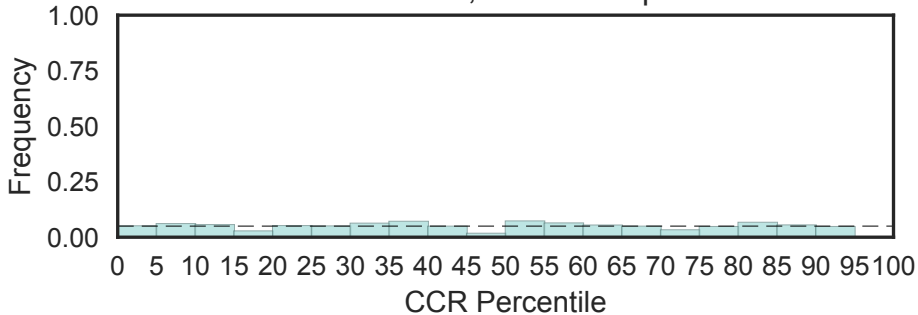

Hydroxymethylglutaryl-coenzyme A synthase C terminal  
(HMG\_CoA\_synt\_C, N=2)

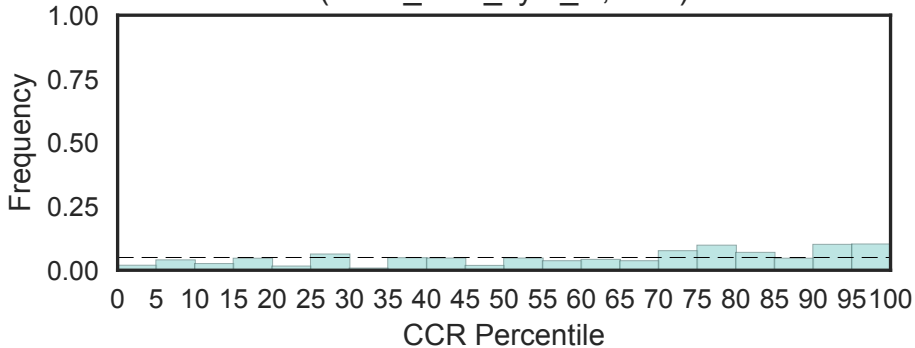



# Hydroxymethylglutaryl-coenzyme A synthase N terminal (HMG\_CoA\_synt\_N, N=2)

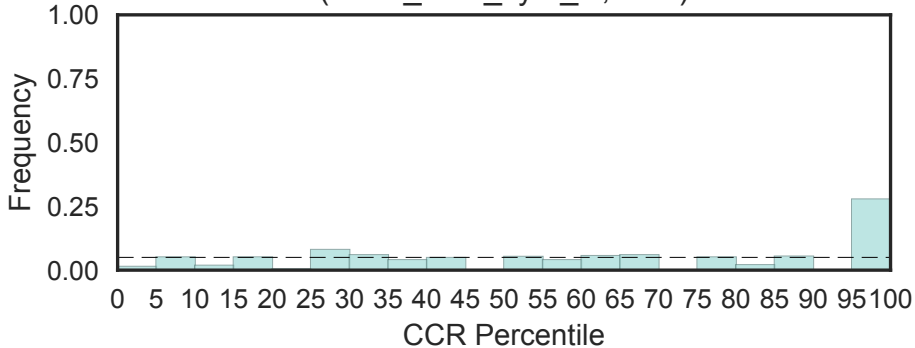

HMG (high mobility group) box  
(HMG\_box, N=53)

Fisher's OR: 8.33; Bonferroni p-val: 1.27e-28

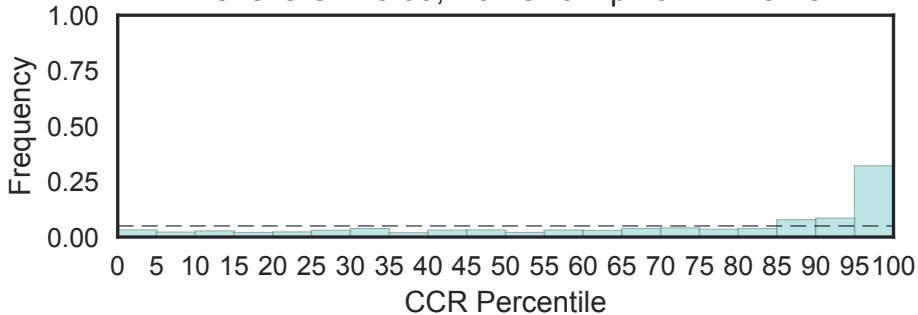

HMG-box domain  
(HMG\_box\_2, N=50)

Fisher's OR: 7.89; Bonferroni p-val: 2.17e-22

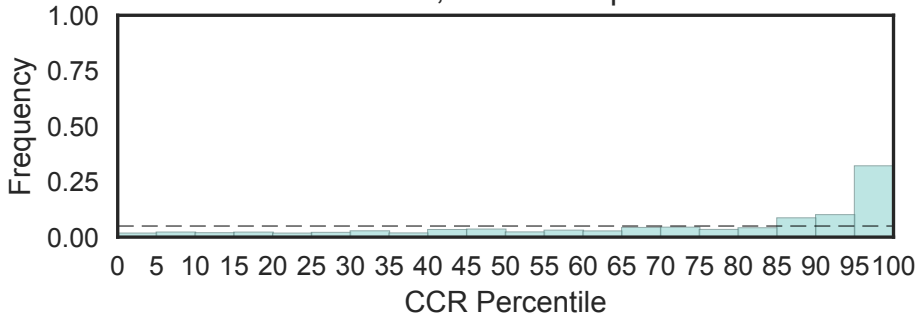

HMG (high mobility group) box 5  
(HMG\_box\_5, N=1)

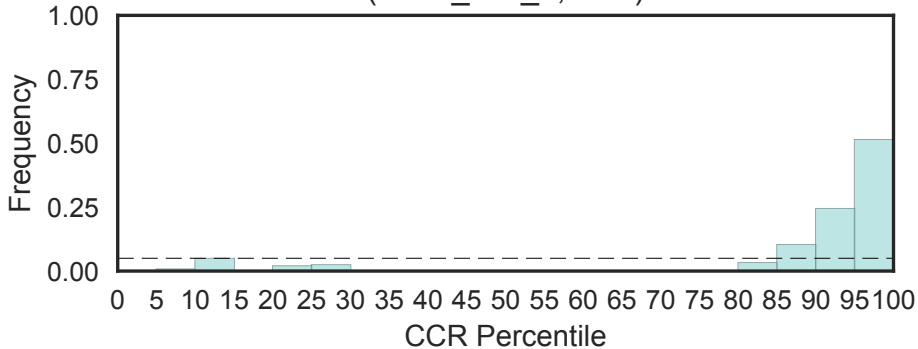

# Hyaluronan mediated motility receptor C-terminal (HMMR\_C, N=2)

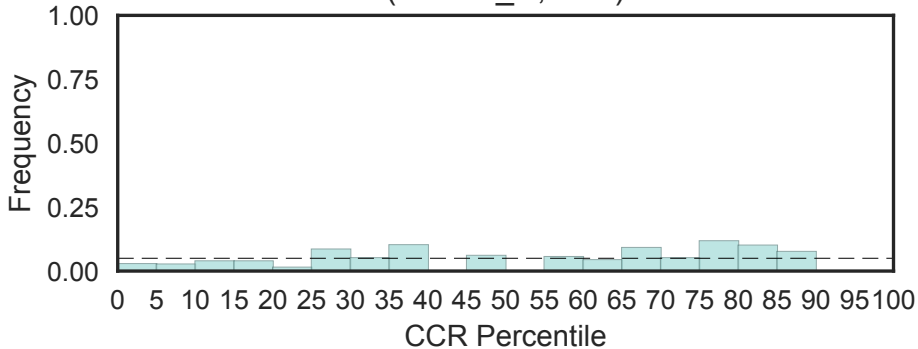

# Hyaluronan mediated motility receptor N-terminal (HMMR\_N, N=1)

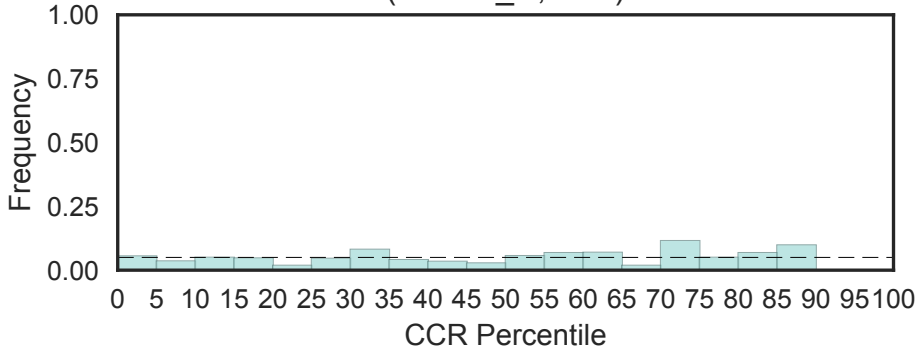

# Hepatocyte nuclear factor 1 (HNF-1), alpha isoform C terminus (HNF-1A\_C, N=1)

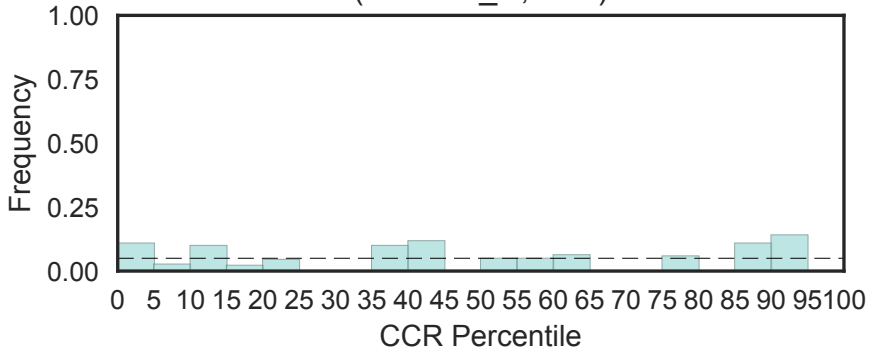

# Hepatocyte nuclear factor 1 (HNF-1), beta isoform C terminus (HNF-1B\_C, N=2)

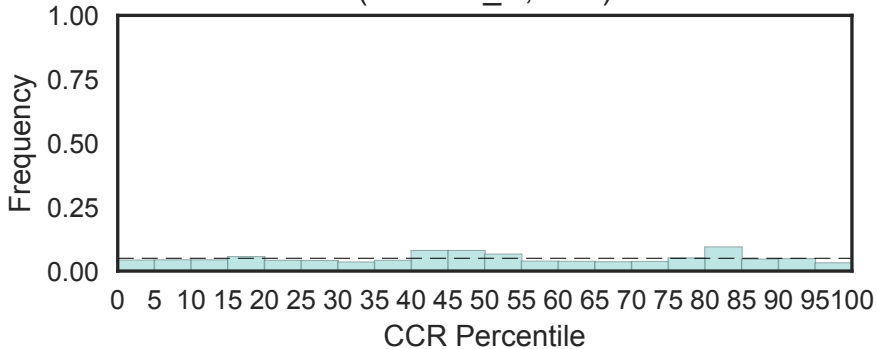



Hepatocyte nuclear factor 1 (HNF-1), N terminus  
(HNF-1\_N, N=3)

Fisher's OR: 1.93; Bonferroni p-val: 1

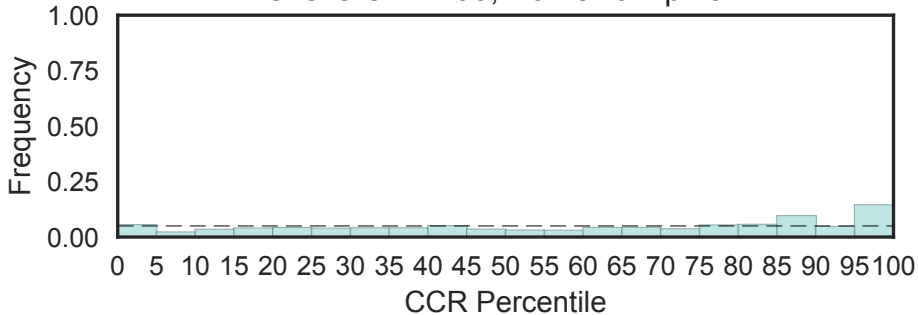

HNF3 C-terminal domain  
(HNF\_C, N=2)

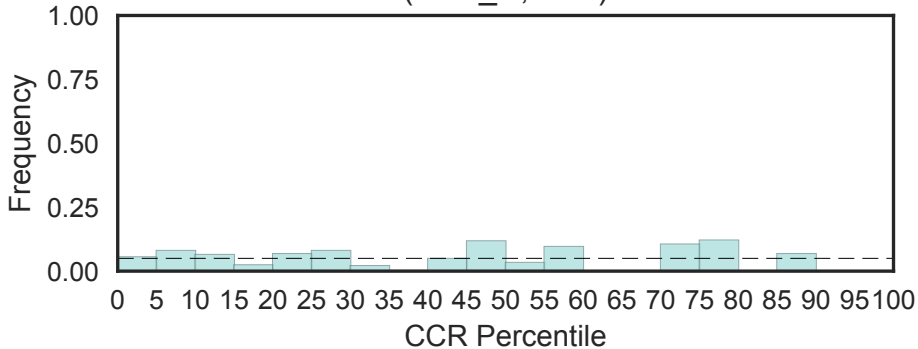

# HNH endonuclease (HNH, N=1)

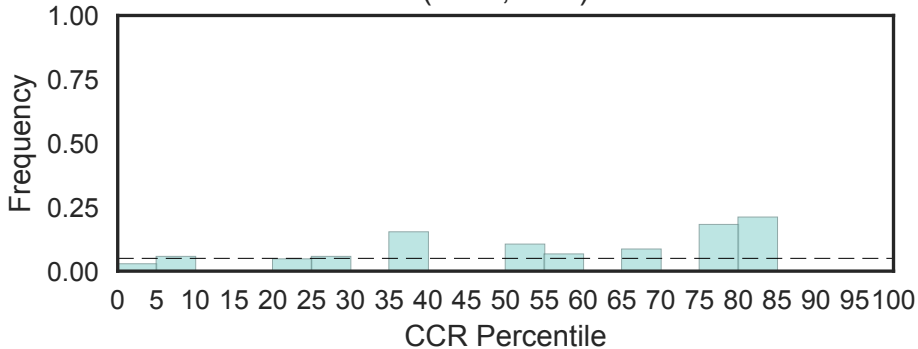

HNH endonuclease  
(HNH\_3, N=1)

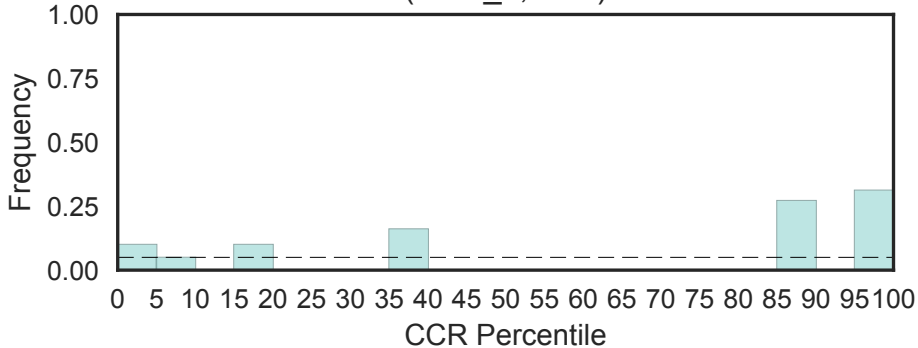

Haem-NO-binding  
(HNOB, N=3)

Fisher's OR: 0.801; Bonferroni p-val: 1

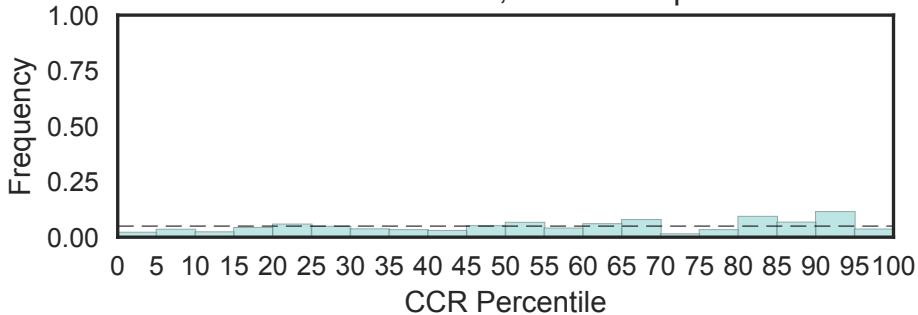

Heme NO binding associated  
(HNOBA, N=4)

Fisher's OR: 2.7; Bonferroni p-val: 1

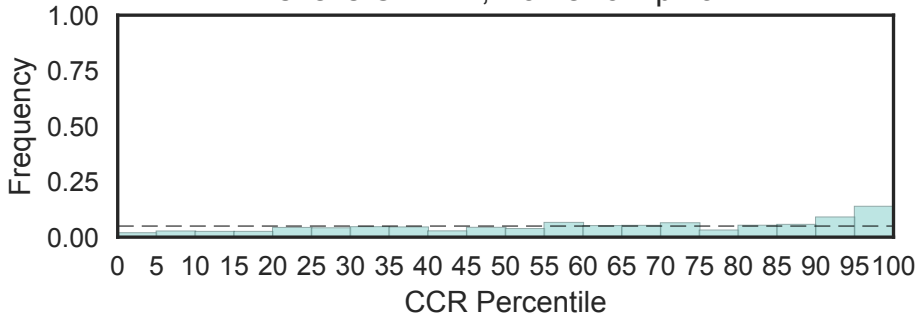

HOIP UBA domain pair  
(HOIP-UBA, N=1)

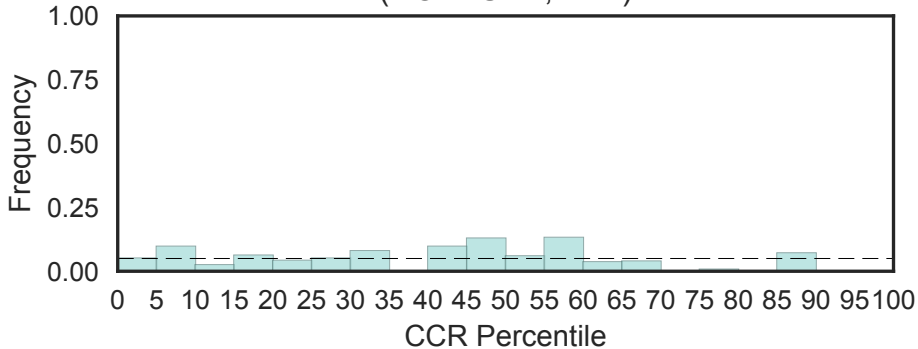

HOOK protein  
(HOOK, N=7)

Fisher's OR: 0.896; Bonferroni p-val: 1

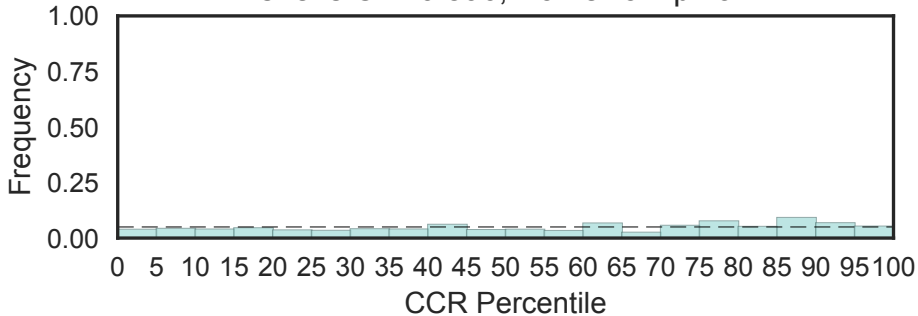



HORMA domain  
(HORMA, N=4)

Fisher's OR: 1.17; Bonferroni p-val: 1

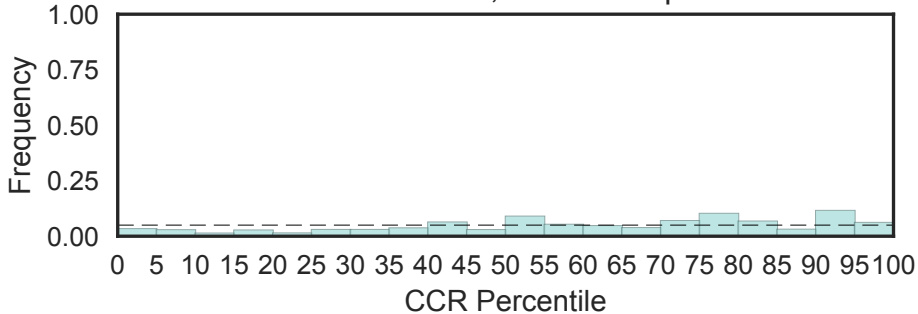

Homeo-prospiero domain  
(HPD, N=3)

Fisher's OR: 2.46; Bonferroni p-val: 1

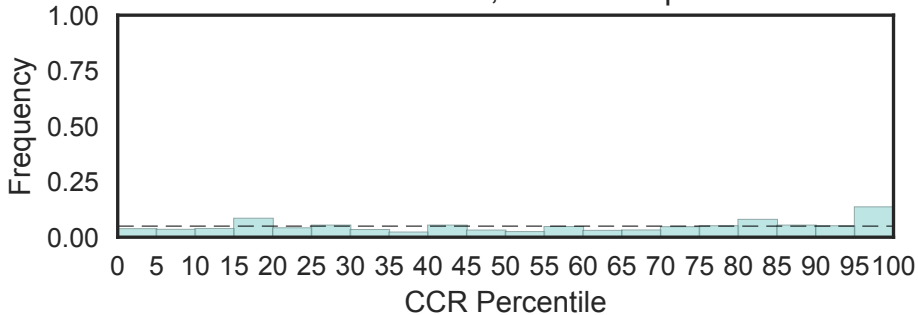

# Domain of unknown function (HPHLAWLY, N=1)

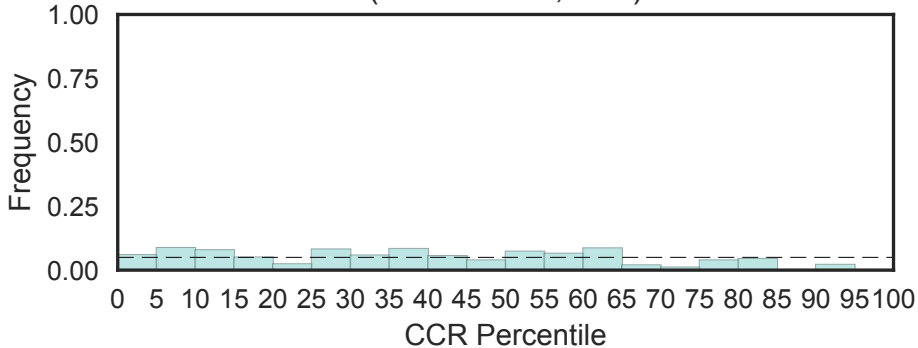

# HCF-1 beta-propeller-interacting protein family (HPIP, N=1)

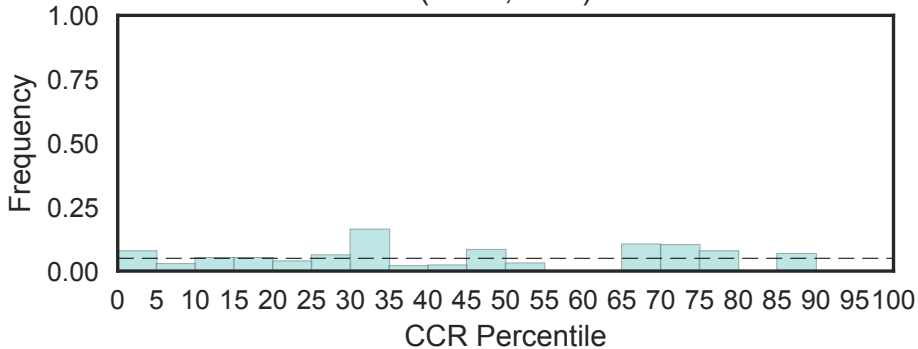

# Hermansky-Pudlak syndrome 3, C-terminal (HPS3\_C, N=2)

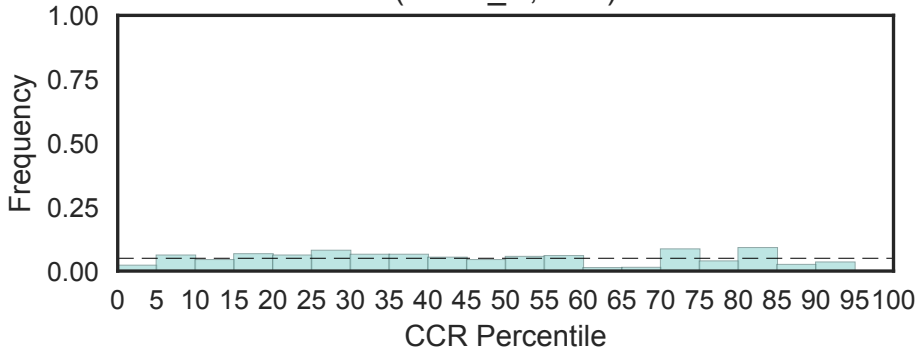

Hermansky-Pudlak syndrome 3, middle region  
(HPS3\_Mid, N=1)

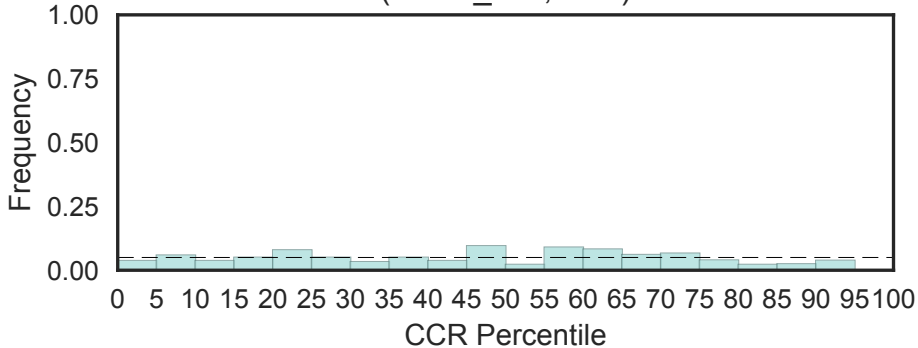

# Hermansky-Pudlak syndrome 3 (HPS3\_N, N=1)

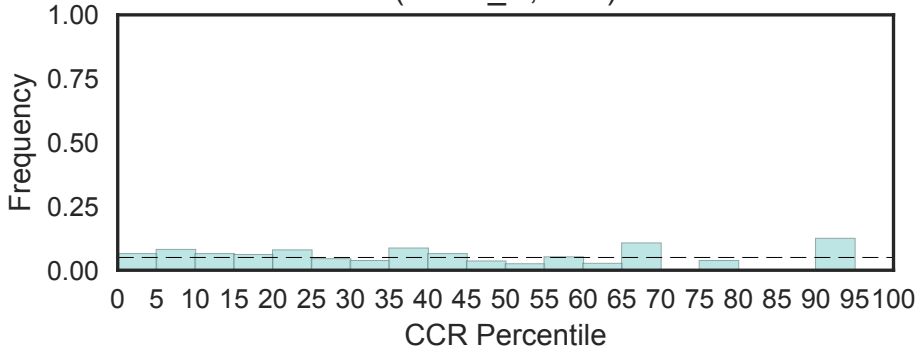

# Hermansky-Pudlak syndrome 6 protein (HPS6, N=1)

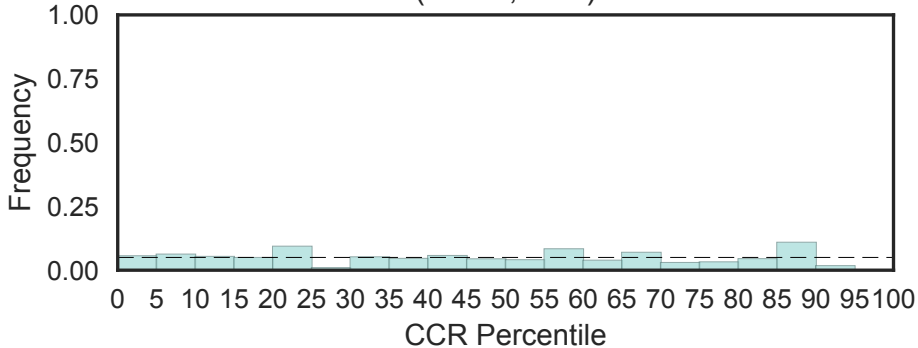



Hr1 repeat  
(HR1, N=11)

Fisher's OR: 3.16; Bonferroni p-val: 1

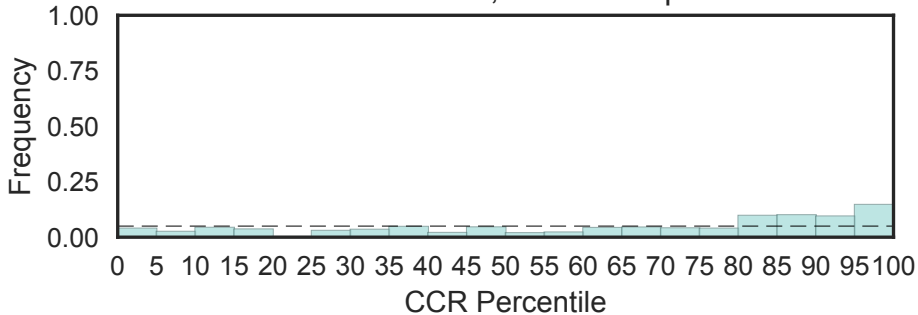

# Histidine-rich carboxyl terminus protein 1 (HRCT1, N=1)

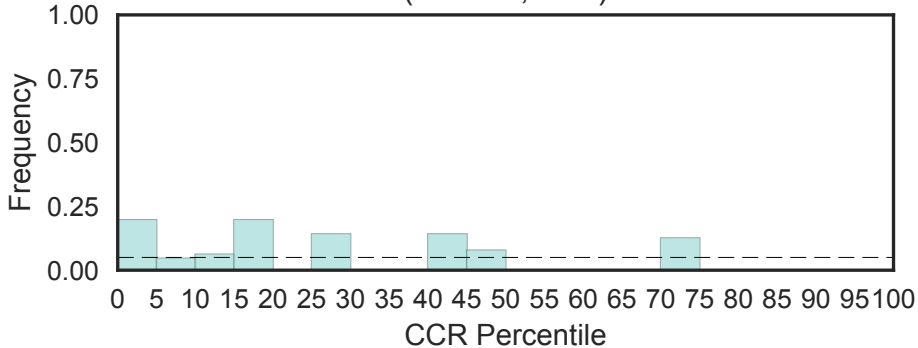

HRDC domain  
(HRDC, N=3)

Fisher's OR: 1.8; Bonferroni p-val: 1

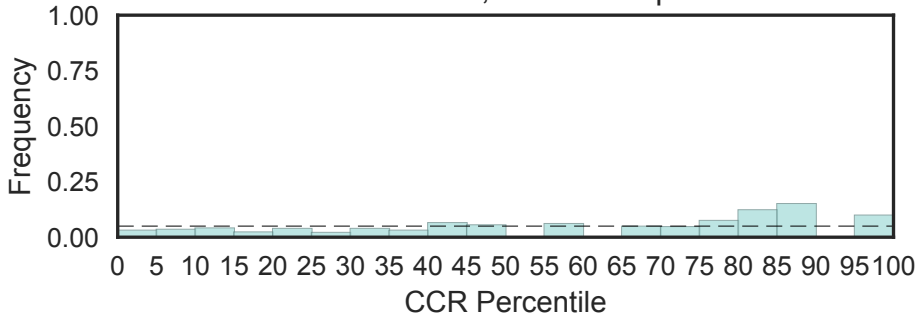

# Haem-transporter, endosomal/lysosomal, haem-responsive gene (HRG, N=2)

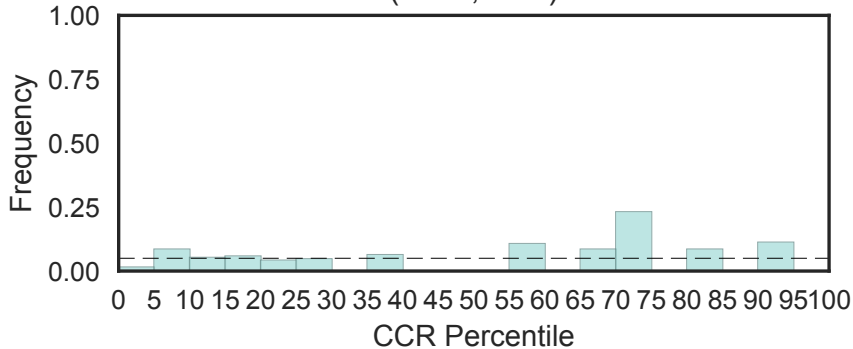

Hormone receptor domain  
(HRM, N=24)

Fisher's OR: 0.366; Bonferroni p-val: 1

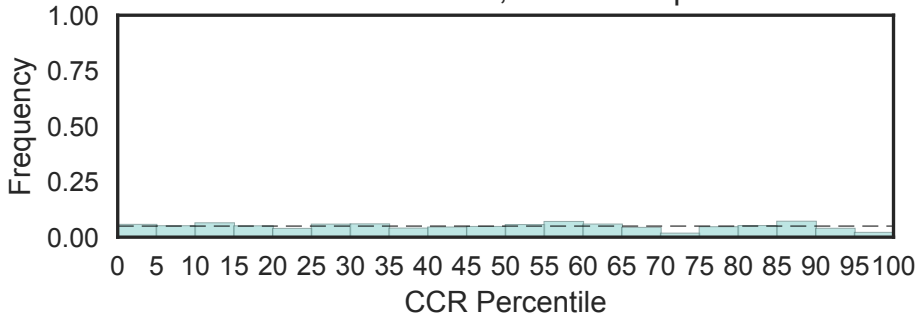

Repeat in HS1/Cortactin  
(HS1\_rep, N=10)

Fisher's OR: 0; Bonferroni p-val: 1

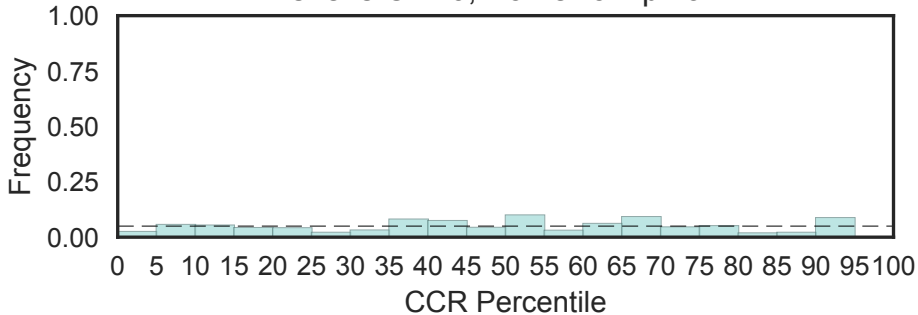

HSA  
(HSA, N=4)

Fisher's OR: 10.5; Bonferroni p-val: 0.242

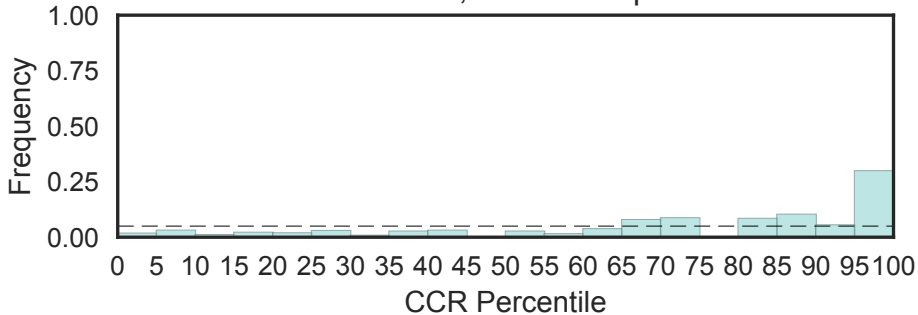

# Heat shock factor binding protein 1 (HSBP1, N=2)

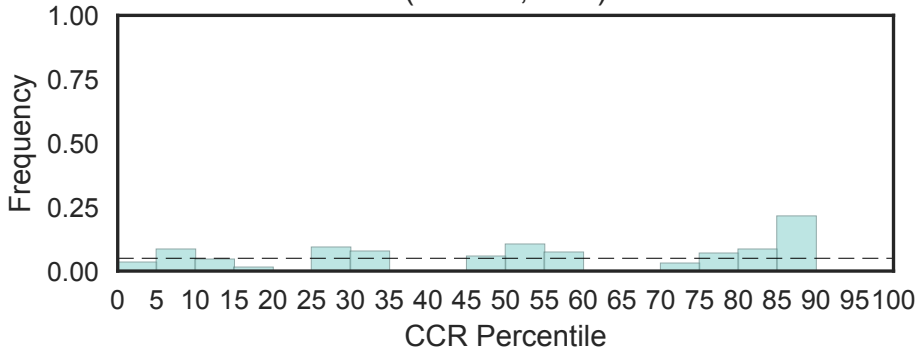



# HSCB C-terminal oligomerisation domain (HSCB\_C, N=1)

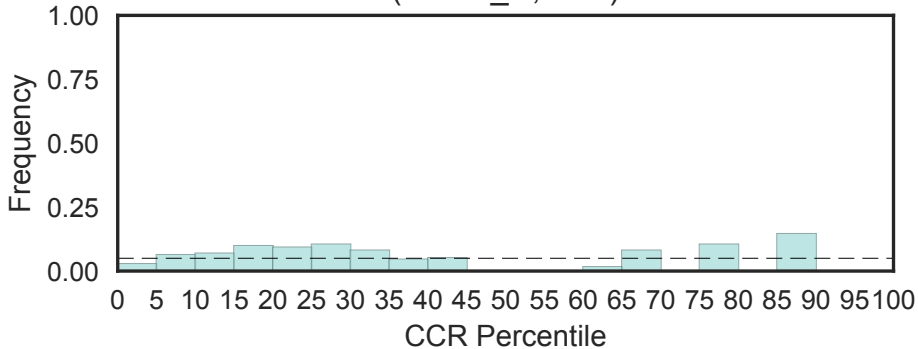

Spermatogenesis-associated protein 7, or HSD3  
(HSD3, N=1)

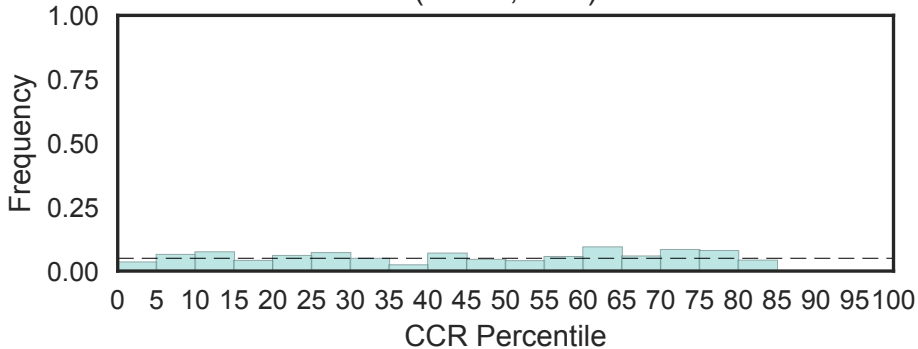

HSF-type DNA-binding  
(HSF\_DNA-bind, N=4)

Fisher's OR: 6.83; Bonferroni p-val: 1

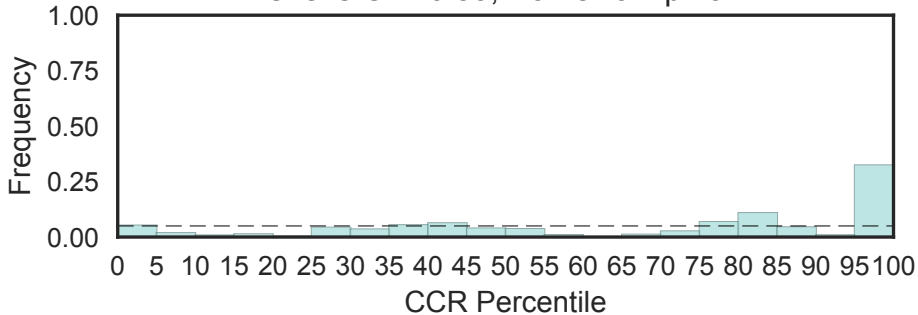

# Hormone-sensitive lipase (HSL) N-terminus (HSL\_N, N=1)

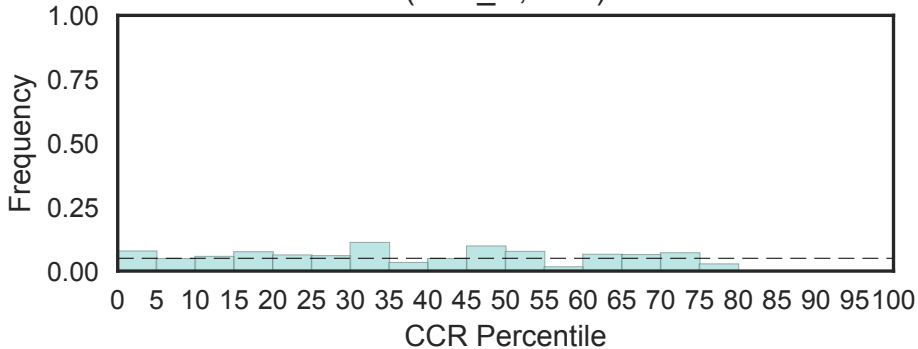

heparan sulfate-N-deacetylase  
(HSNSD, N=5)

Fisher's OR: 0.661; Bonferroni p-val: 1

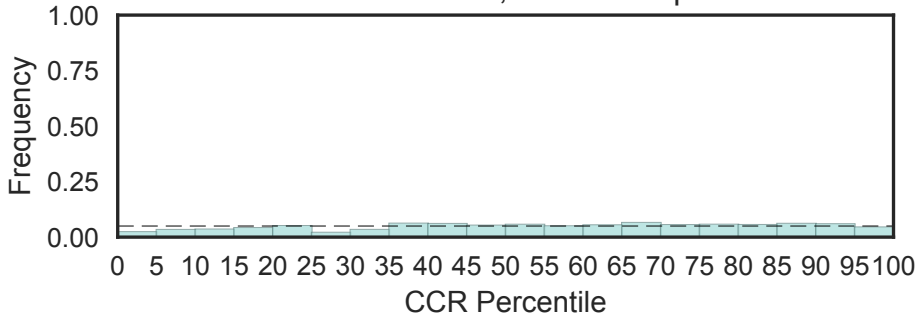

Hsp20/alpha crystallin family  
(HSP20, N=10)

Fisher's OR: 0.311; Bonferroni p-val: 1

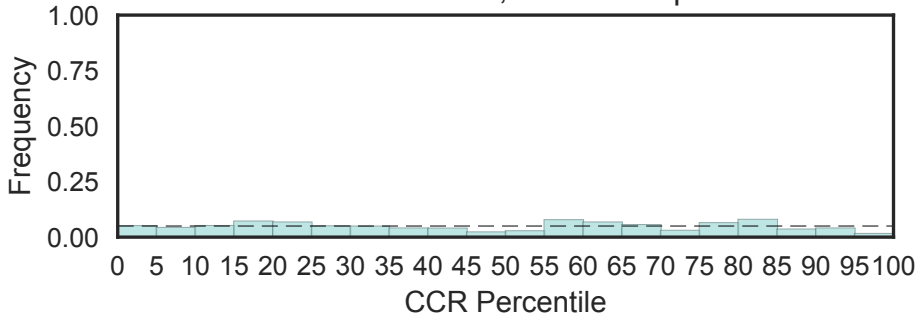

Hsp70 protein  
(HSP70, N=16)

Fisher's OR: 1.1; Bonferroni p-val: 1

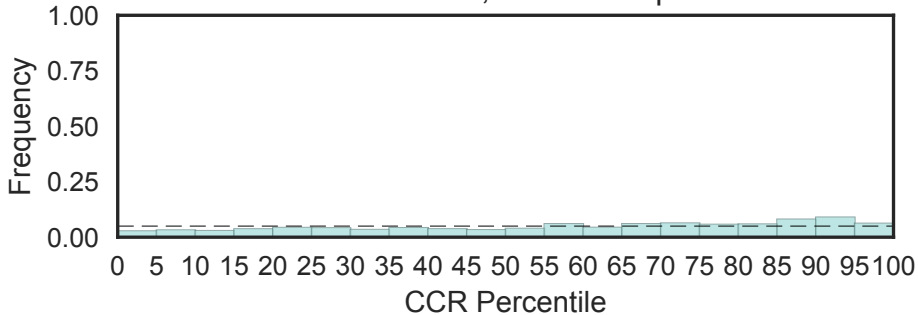

Hsp90 protein  
(HSP90, N=5)

Fisher's OR: 1.36; Bonferroni p-val: 1

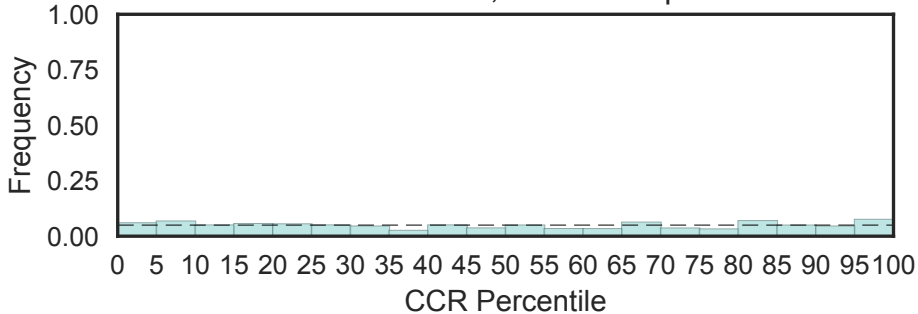



HSR domain  
(HSR, N=5)

Fisher's OR: 0.594; Bonferroni p-val: 1

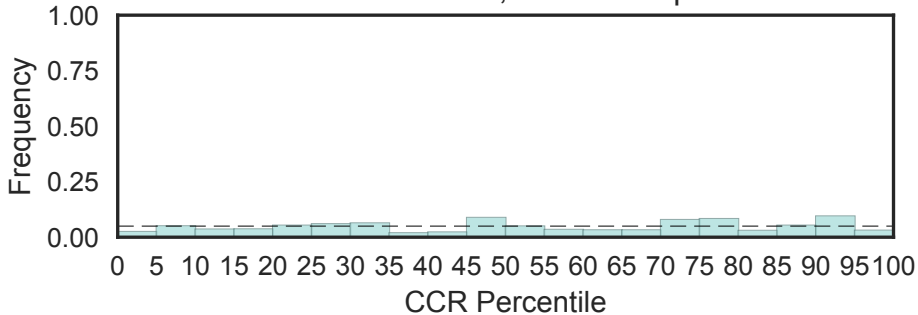

Homeodomain-like domain  
(HTH\_23, N=3)

Fisher's OR: 6.55; Bonferroni p-val: 1

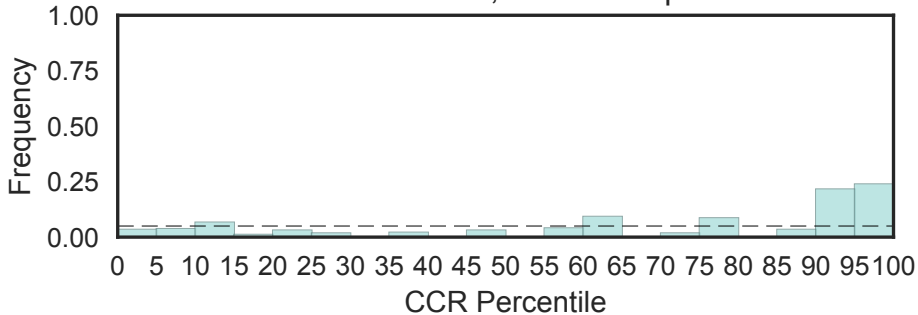

Helix-turn-helix  
(HTH\_3, N=1)

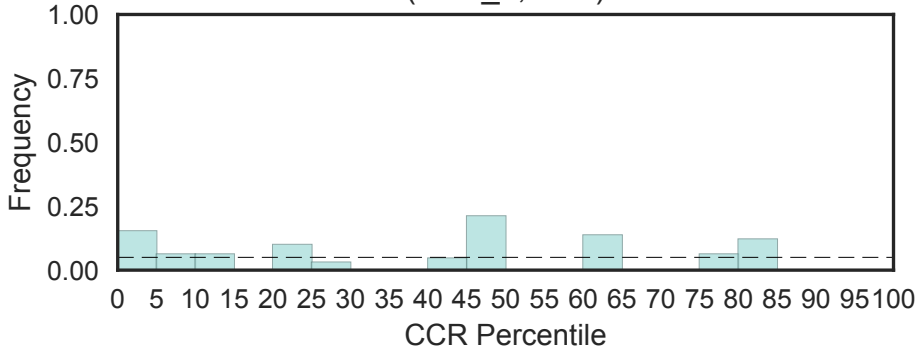

Helix-turn-helix domain  
(HTH\_40, N=1)

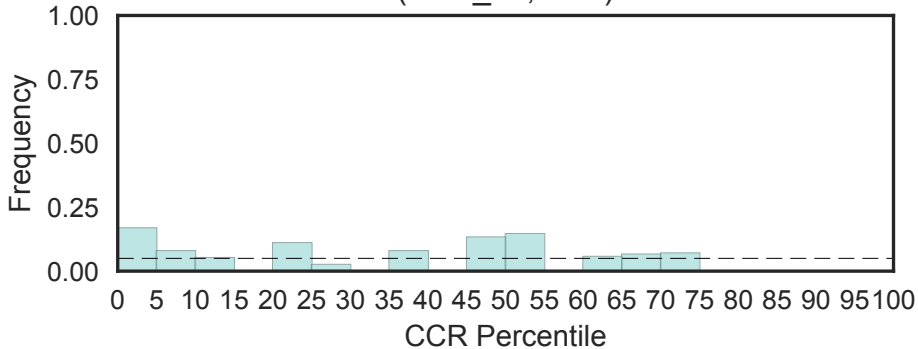

# Helix-turn-helix DNA-binding domain of SPT6 (HTH\_44, N=1)

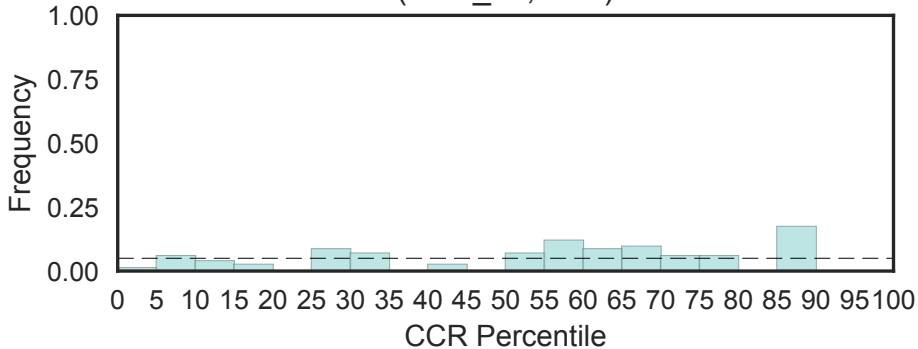

RNA polymerase III subunit RPC82 helix-turn-helix domain  
(HTH\_9, N=1)

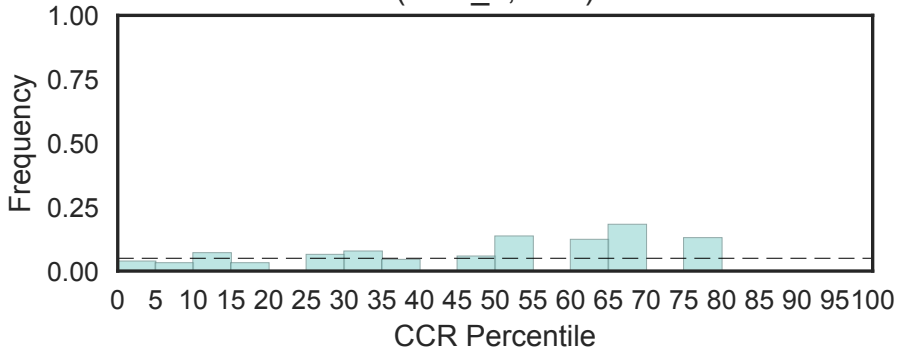

Transposase  
(HTH\_Tnp\_1, N=1)

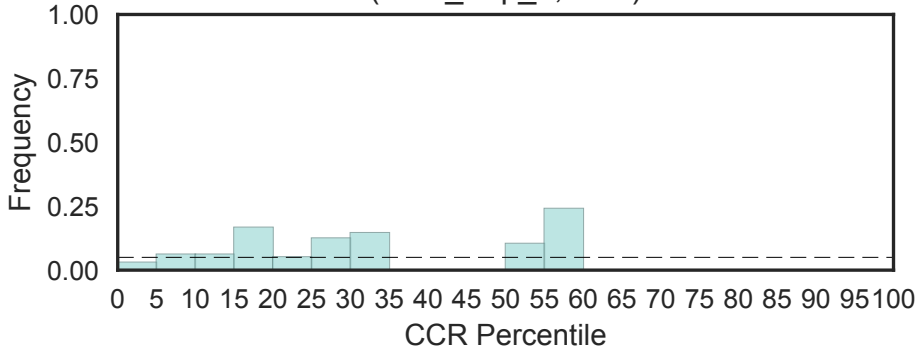

Tc5 transposase DNA-binding domain  
(HTH\_Tnp\_Tc5, N=12)

Fisher's OR: 3.02; Bonferroni p-val: 1

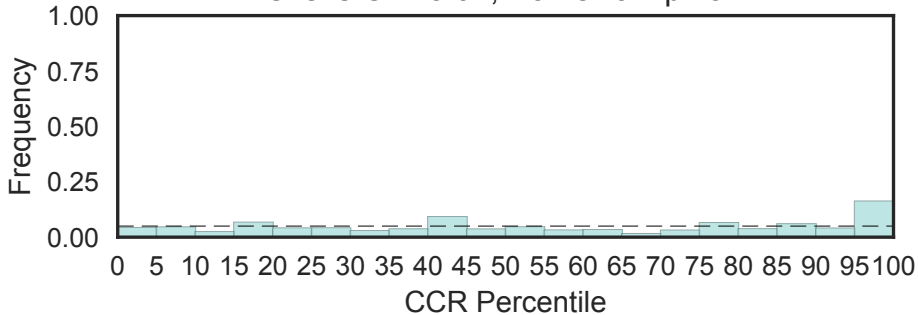



helix-turn-helix, Psq domain

(HTH\_psq, N=3)

Fisher's OR: 0; Bonferroni p-val: 1

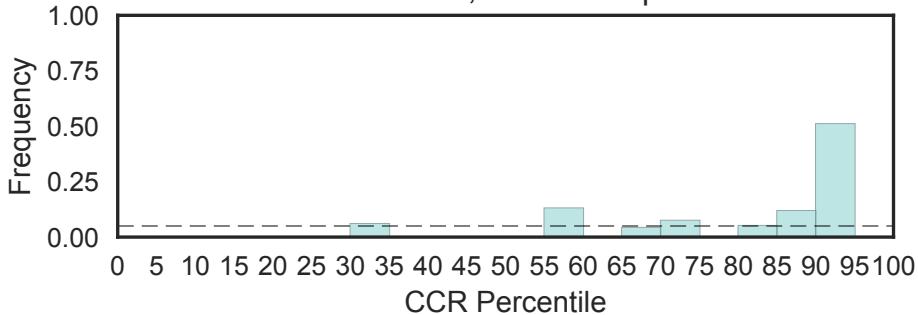

# HPC2 and ubinuclein domain (HUN, N=2)

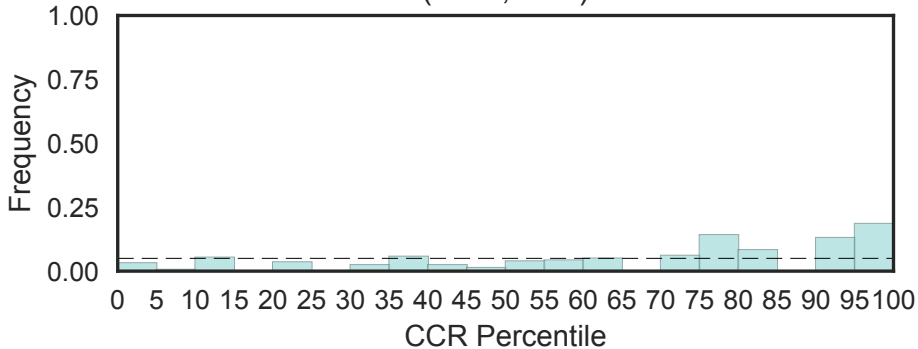

# Uncharacterised conserved protein (HVSL, N=1)

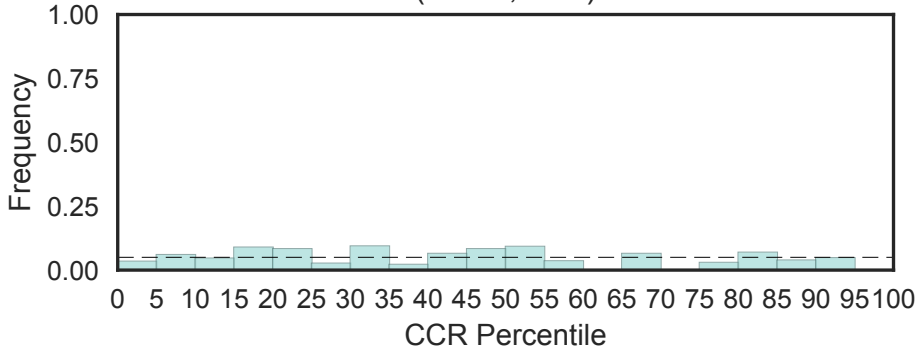

Hydrolethalus syndrome protein 1 C-terminus  
(HYLS1\_C, N=1)

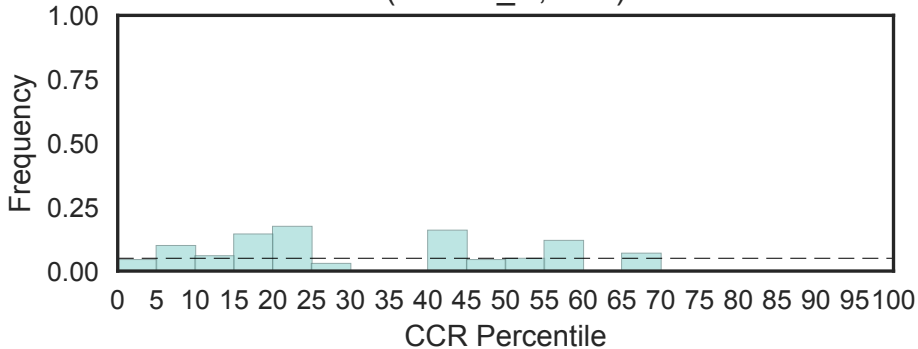

HYR domain  
(HYR, N=2)

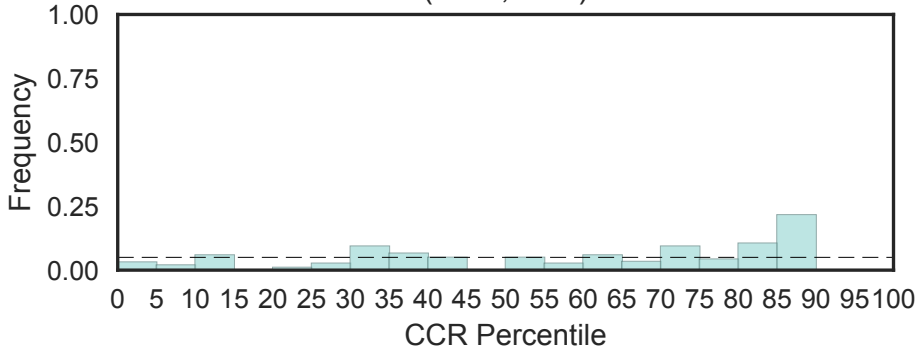

# Hairy Orange

(Hairy\_orange, N=11)

Fisher's OR: 0.832; Bonferroni p-val: 1

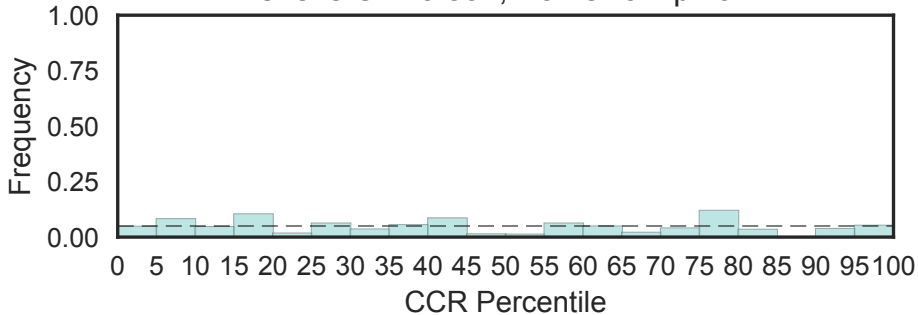

Ham1 family  
(Ham1p\_like, N=1)

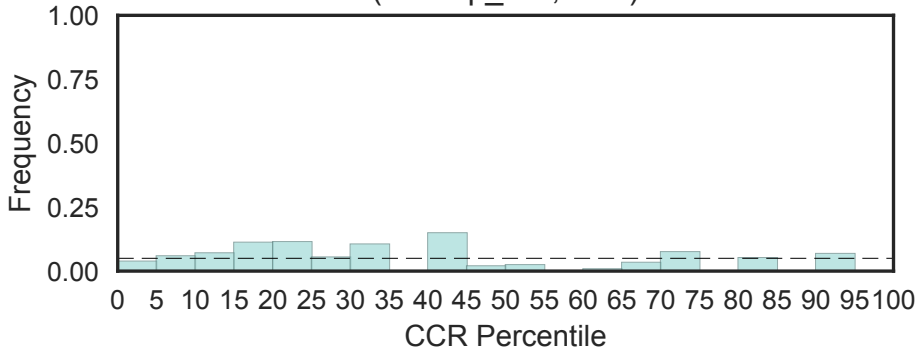

# Hamartin protein (Hamartin, N=2)

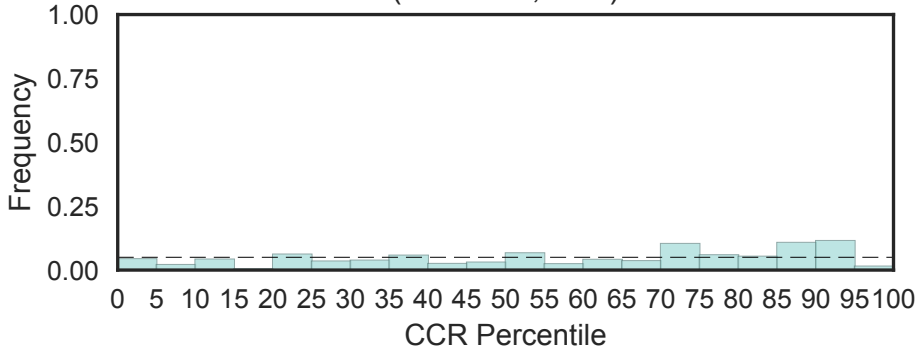



# Haspin like kinase domain

(Haspin\_kinase, N=7)

Fisher's OR: 4.7; Bonferroni p-val: 0.0107

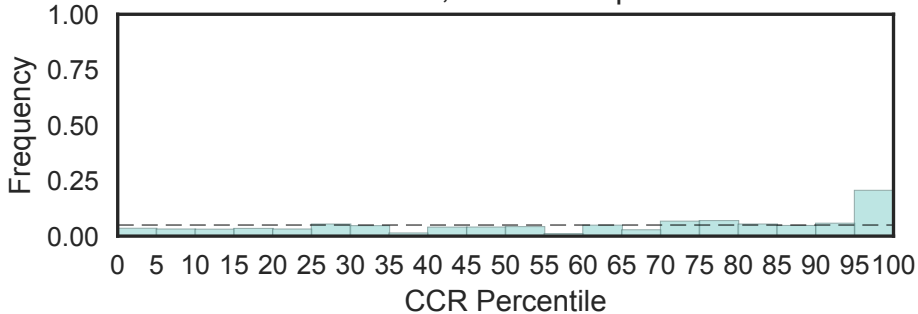

Histone acetyl transferase HAT1 N-terminus  
(Hat1\_N, N=1)

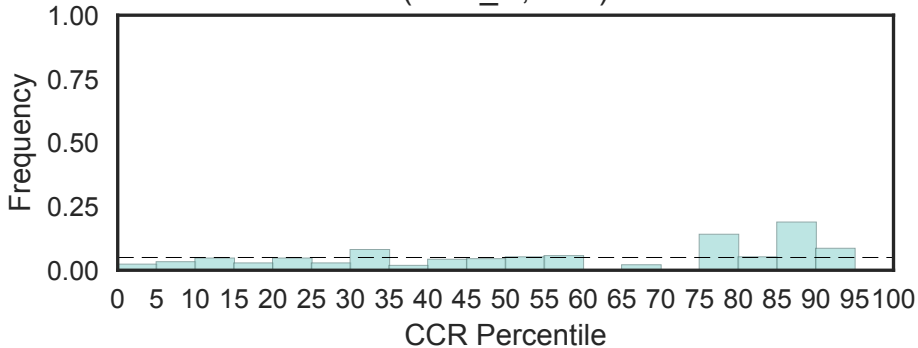

HbrB-like  
(HbrB, N=4)

Fisher's OR: 0; Bonferroni p-val: 1

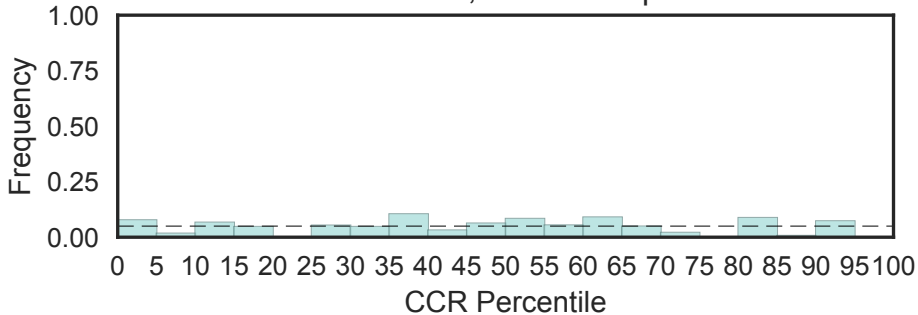

# Headcase protein (Headcase, N=1)

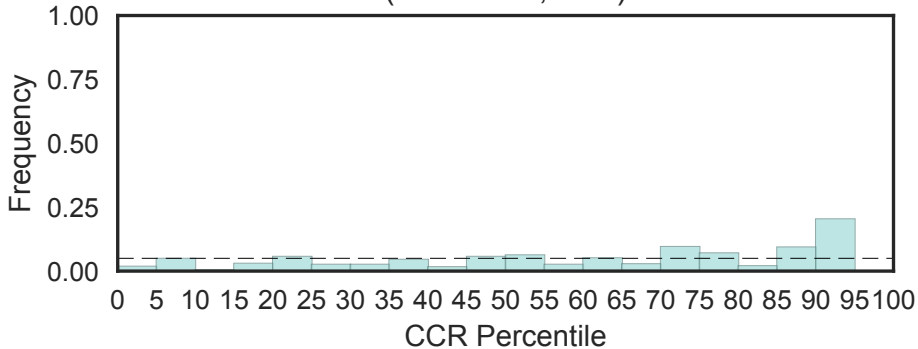

Helicase conserved C-terminal domain  
(Helicase\_C, N=103)

Fisher's OR: 3.48; Bonferroni p-val: 1.35e-22

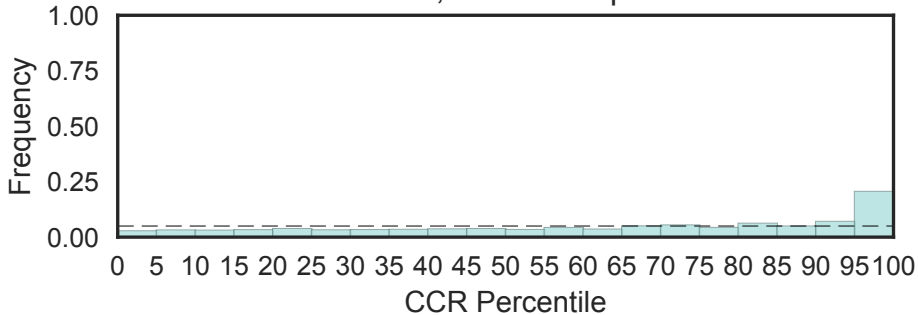

# Helicase C-terminal domain

(Helicase\_C\_2, N=4)

Fisher's OR: 0.522; Bonferroni p-val: 1

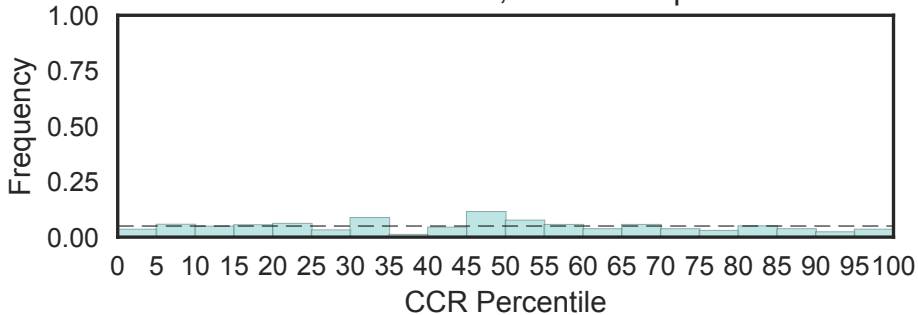

Helicase conserved C-terminal domain  
(Helicase\_C\_3, N=1)

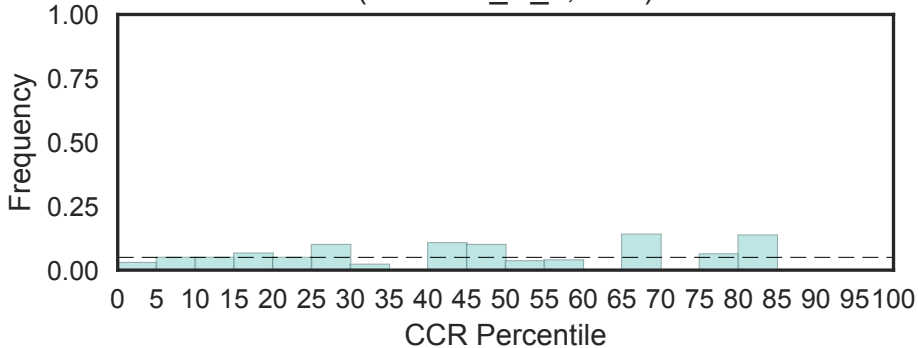

C-terminal domain on Strawberry notch homologue  
(Helicase\_C\_4, N=2)

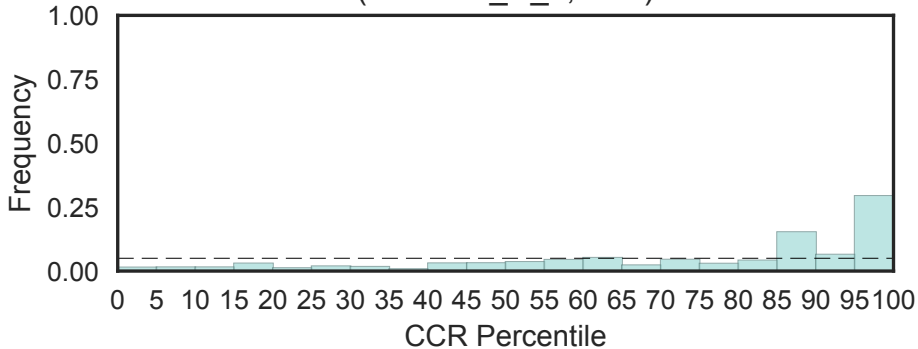



# Helicase (Helicase\_RecD, N=1)

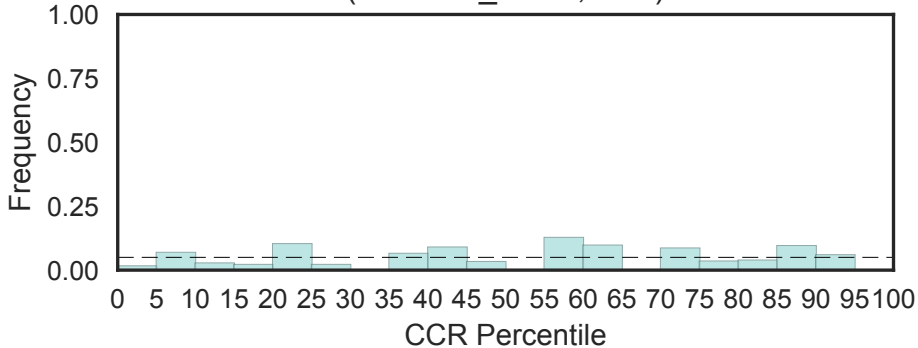

HemN C-terminal domain  
(HemN\_C, N=1)

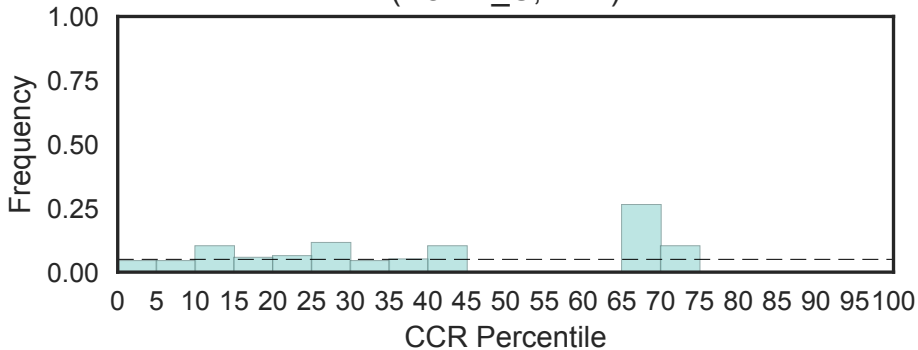

# Heme oxygenase (Heme\_oxygenase, N=2)

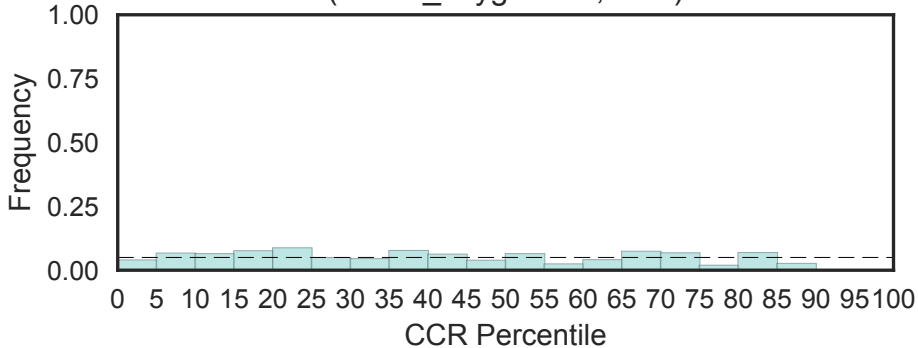

Hemerythrin HHE cation binding domain  
(Hemerythrin, N=1)

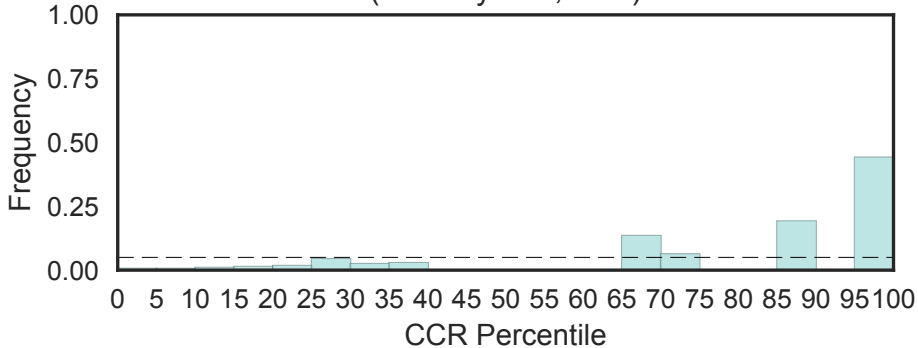

Hemopexin  
(Hemopexin, N=83)  
Fisher's OR: 0.441; Bonferroni p-val: 1

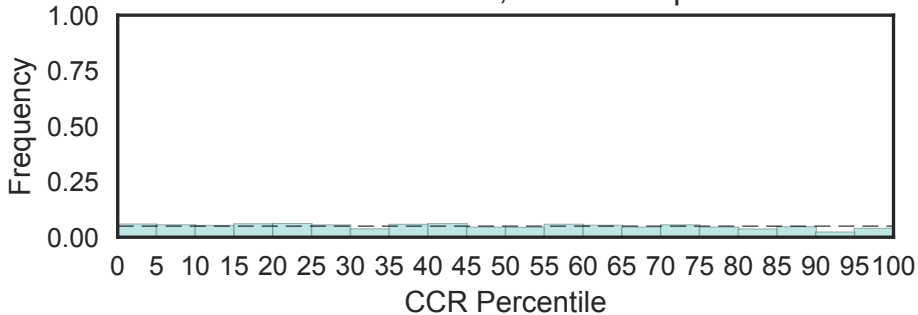

# Hepatocellular carcinoma-associated antigen 59 (Hep\_59, N=1)

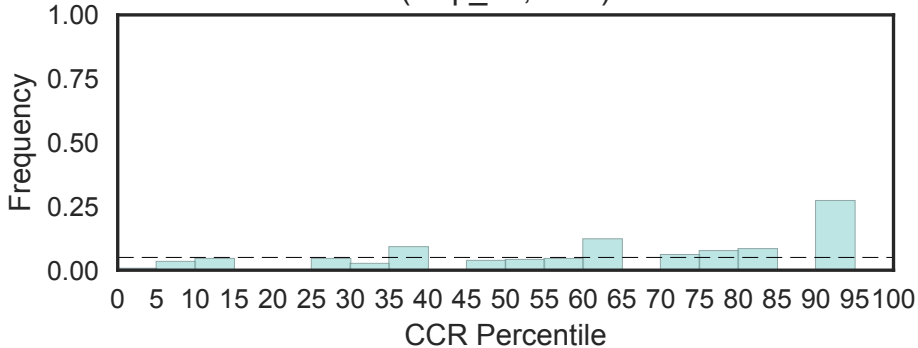

# Hepcidin

(Hepcidin, N=1)

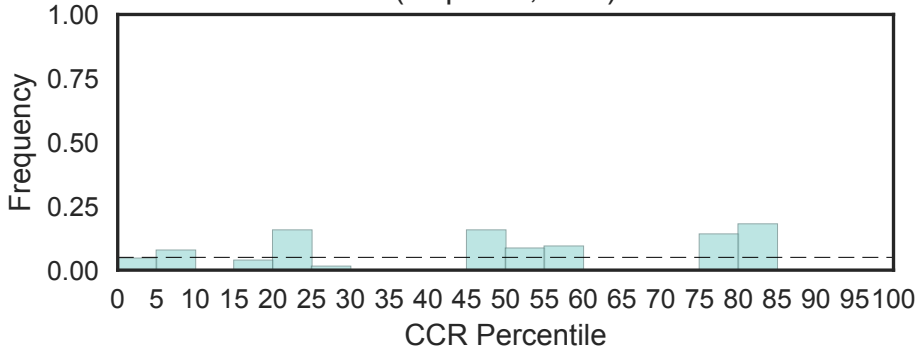

# Hepsin, SRCR (Hepsin-SRCR, N=1)

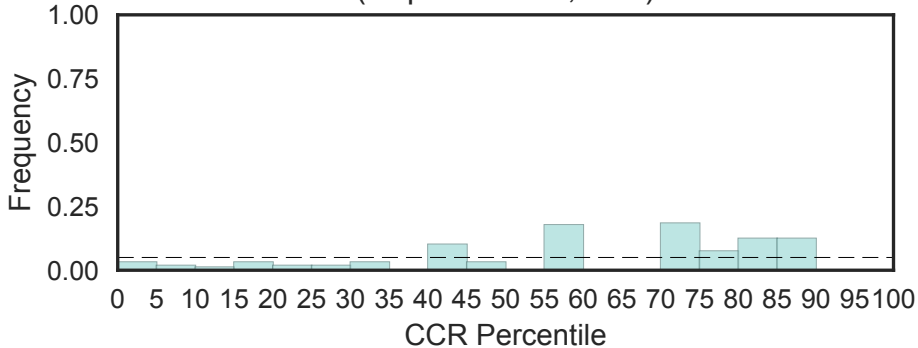



# Helicase (Herpes\_Helicase, N=1)

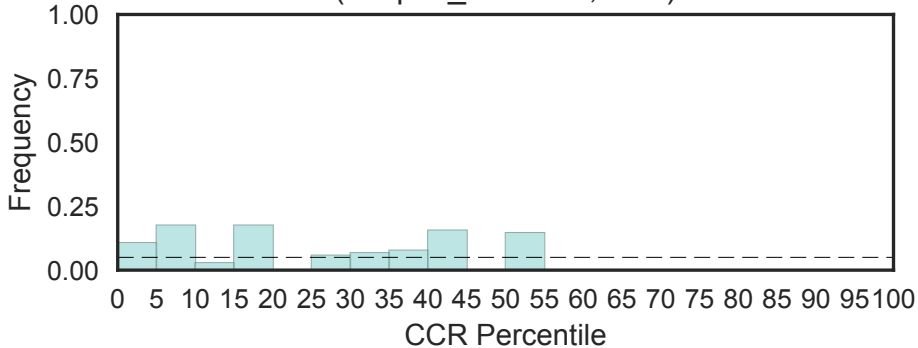

Herpesviridae UL52/UL70 DNA primase  
(Herpes\_UL52, N=1)

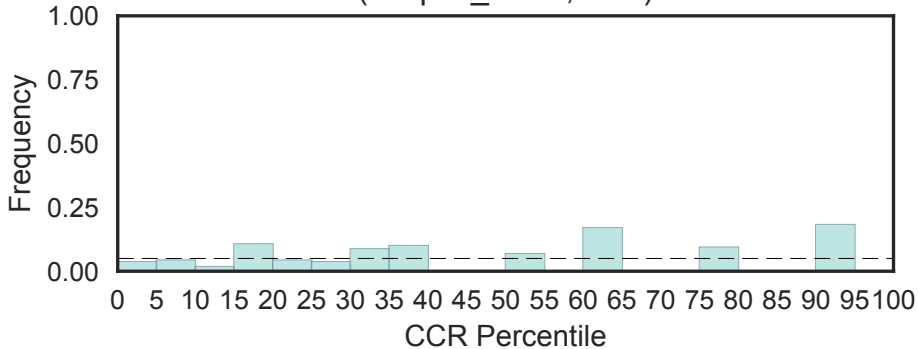

Bacterial transferase hexapeptide (six repeats)  
(Hexapep, N=5)

Fisher's OR: 0; Bonferroni p-val: 1

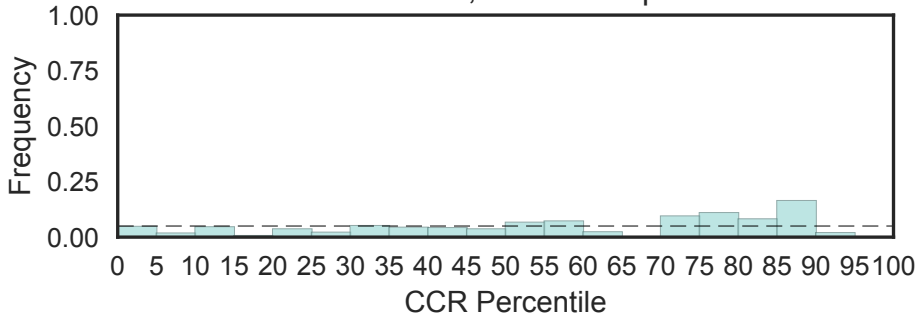

Hexapeptide repeat of succinyl-transferase  
(Hexapep\_2, N=3)

Fisher's OR: 0; Bonferroni p-val: 1

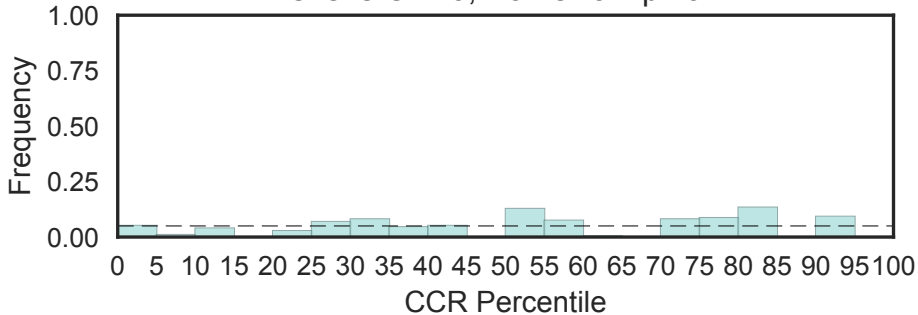

Hexokinase  
(Hexokinase\_1, N=9)  
Fisher's OR: 1.63; Bonferroni p-val: 1

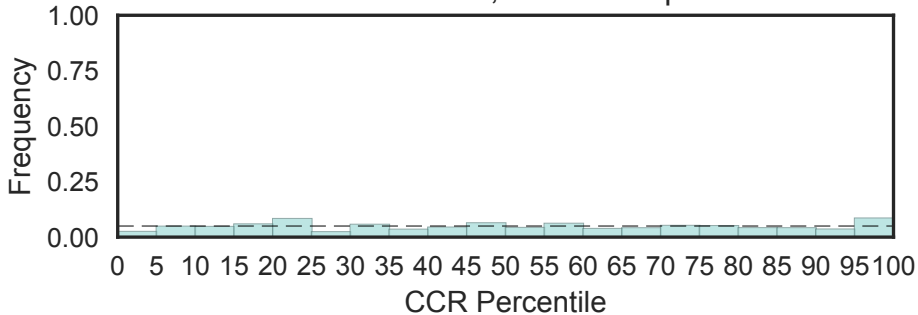

# Hexokinase

(Hexokinase\_2, N=9)

Fisher's OR: 0.416; Bonferroni p-val: 1

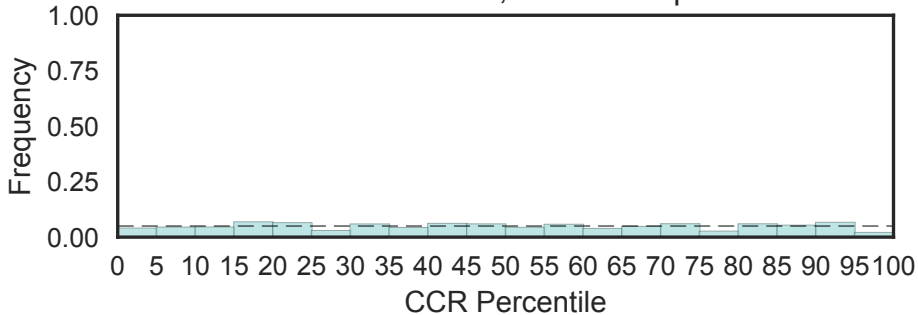

homogentisate 1,2-dioxygenase  
(HgmA, N=1)

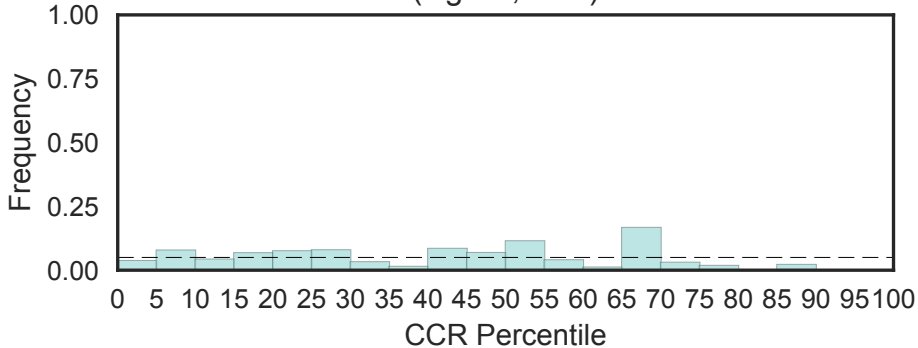

HhH-GPD superfamily base excision DNA repair protein  
(HhH-GPD, N=3)

Fisher's OR: 0.53; Bonferroni p-val: 1

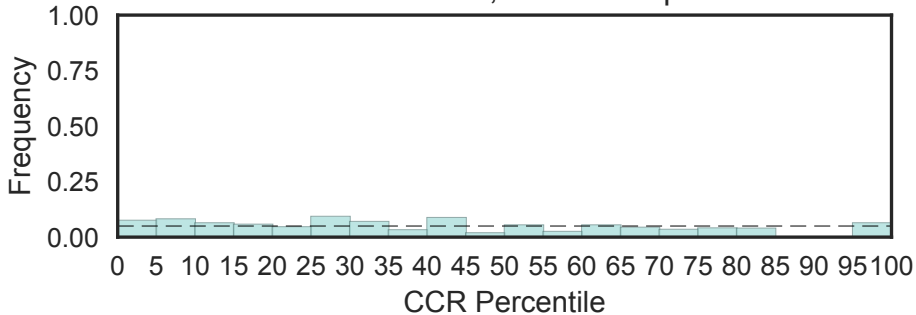



High-temperature-induced dauer-formation protein  
(Hid1, N=3)

Fisher's OR: 1.1; Bonferroni p-val: 1

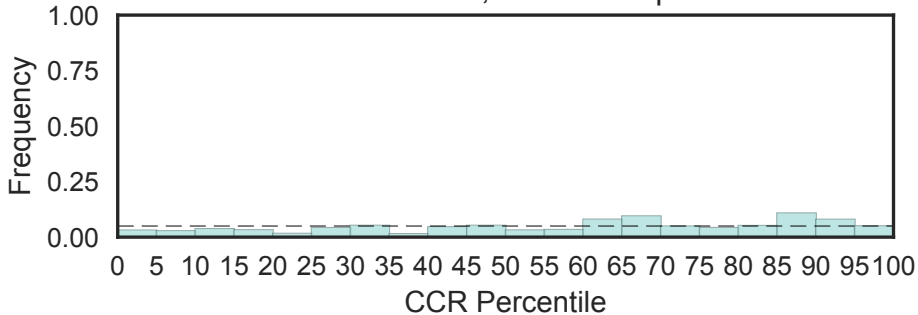

Hint module  
(Hint, N=3)

Fisher's OR: 2.35; Bonferroni p-val: 1

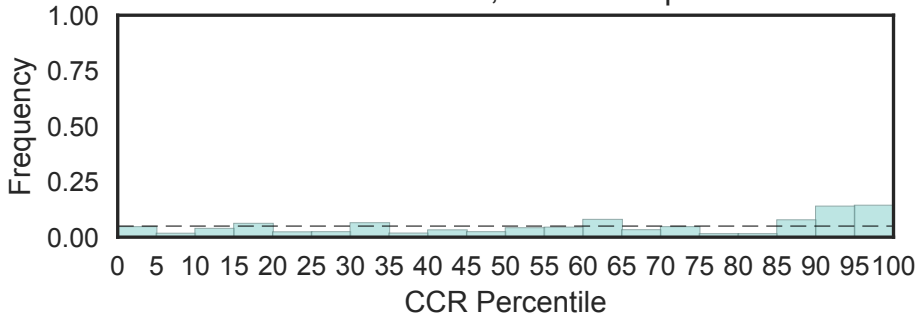

# TUP1-like enhancer of split (Hira, N=1)

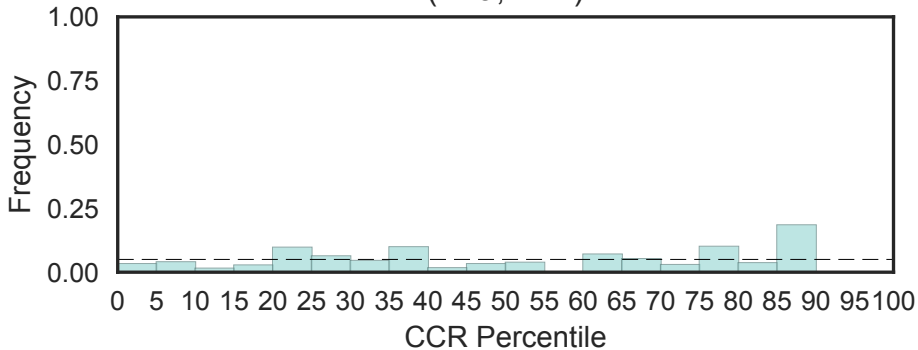

Histidine phosphatase superfamily (branch 1)  
(His\_Phos\_1, N=14)

Fisher's OR: 0.172; Bonferroni p-val: 1

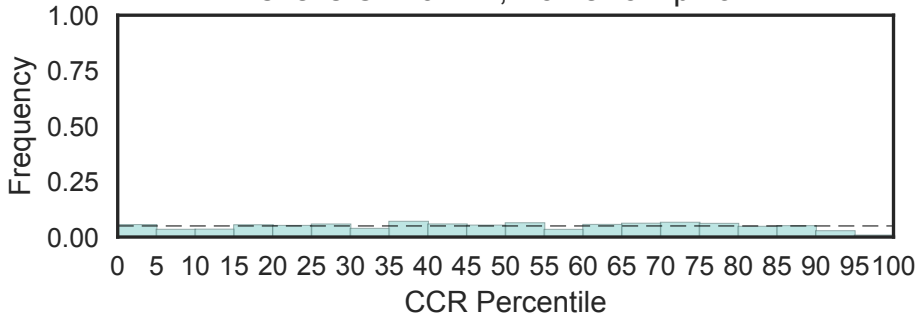

Histidine phosphatase superfamily (branch 2)  
(His\_Phos\_2, N=9)

Fisher's OR: 0.865; Bonferroni p-val: 1

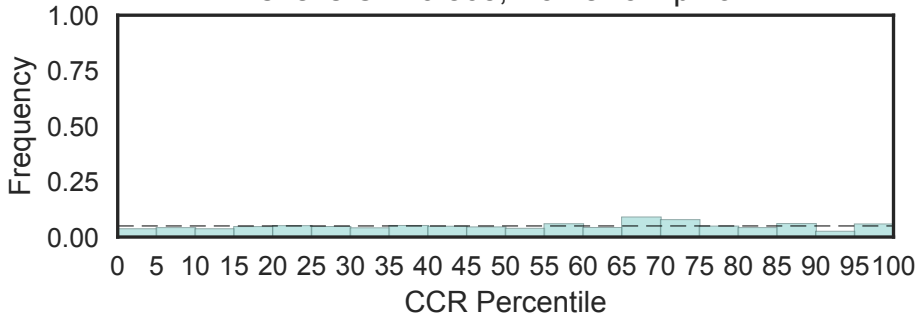

Histone deacetylase domain  
(Hist\_deacetyl, N=9)

Fisher's OR: 4.5; Bonferroni p-val: 1.27e-06

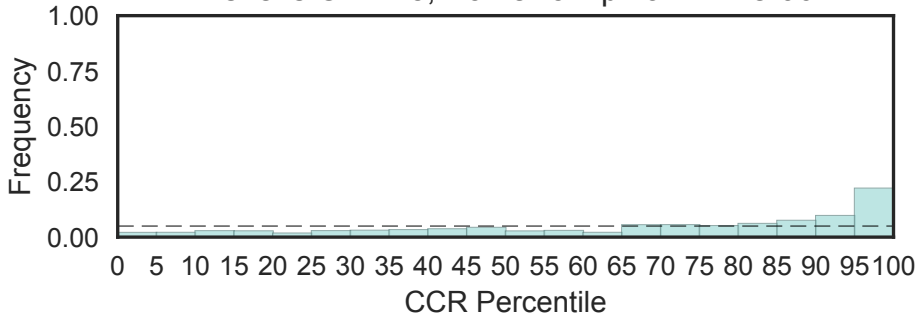

Histidine-rich Calcium-binding repeat region  
(Hist\_rich\_Ca-bd, N=6)

Fisher's OR: 0; Bonferroni p-val: 1

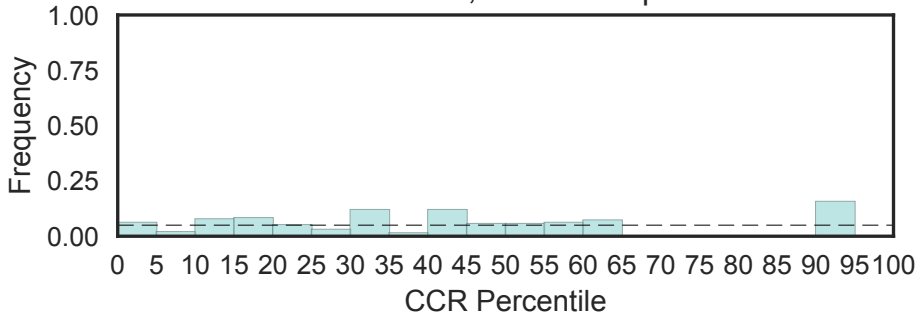

Core histone H2A/H2B/H3/H4  
(Histone, N=64)

Fisher's OR: 0.978; Bonferroni p-val: 1

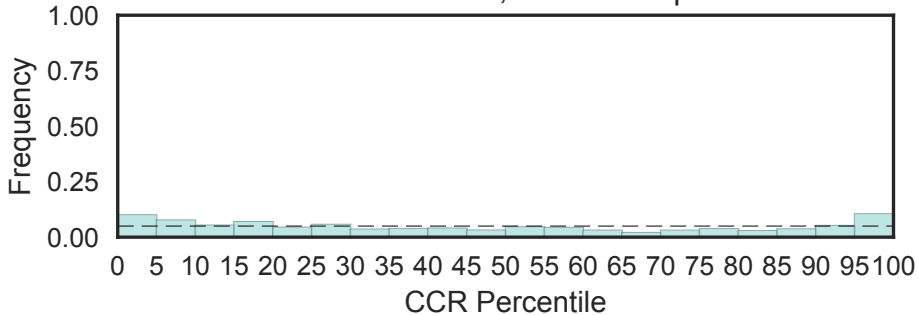



C-terminus of histone H2A  
(Histone\_H2A\_C, N=22)  
Fisher's OR: 1.05; Bonferroni p-val: 1

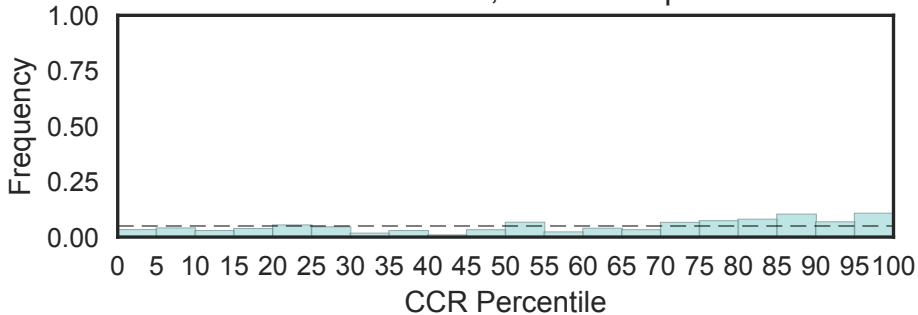

Haemolysin-III related  
(HlyIII, N=11)

Fisher's OR: 0.556; Bonferroni p-val: 1

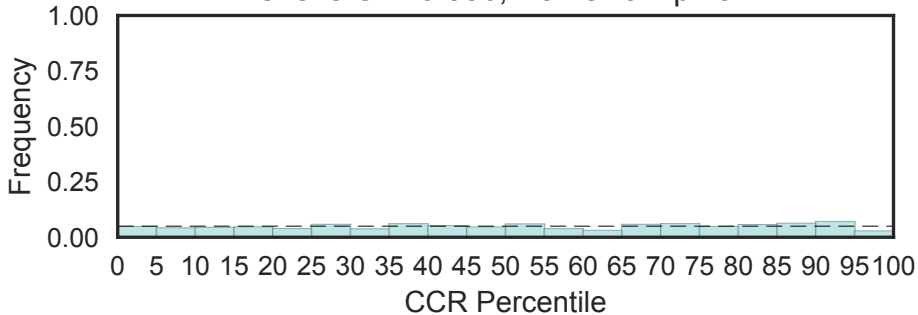

Nuclear factor hnRNPA1  
(HnRNPA1, N=3)

Fisher's OR: 0; Bonferroni p-val: 1

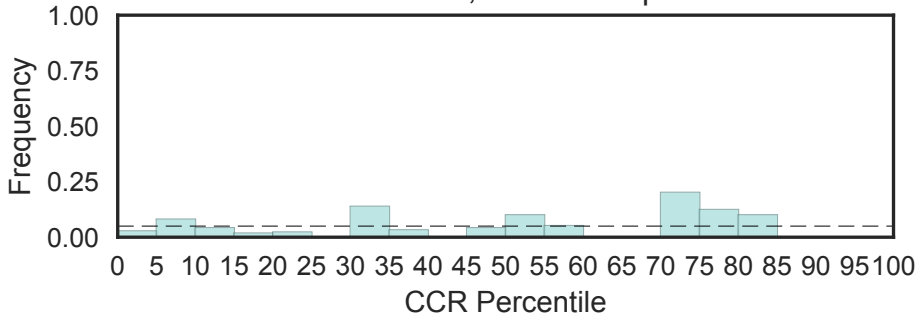

Homeobox domain  
(Homeobox, N=245)

Fisher's OR: 3.35; Bonferroni p-val: 2.94e-22

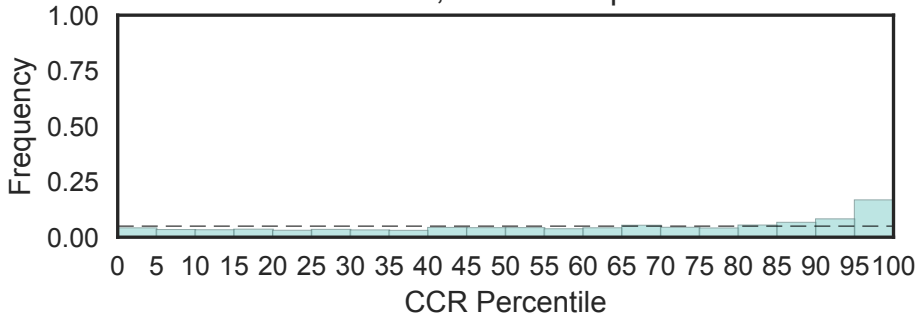

Homeobox KN domain  
(Homeobox\_KN, N=51)

Fisher's OR: 5.78; Bonferroni p-val: 3.18e-08

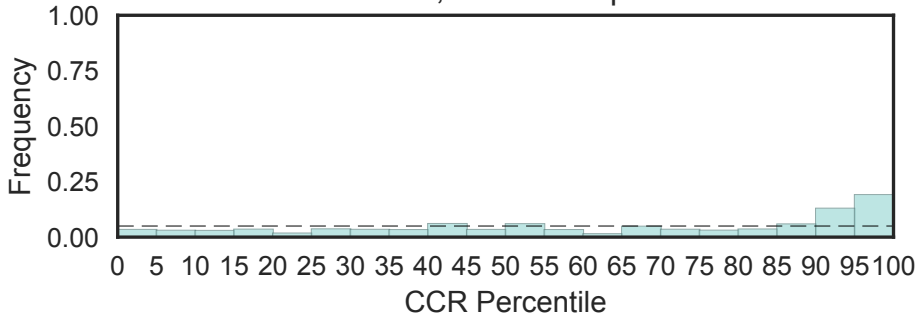

Homeodomain leucine-zipper encoding, Homez  
(Homez, N=3)

Fisher's OR: 0; Bonferroni p-val: 1

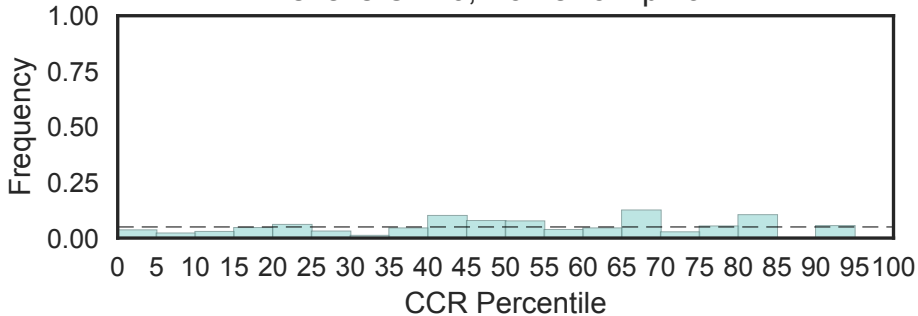

# Somatotropin hormone family

(Hormone\_1, N=8)

Fisher's OR: 0; Bonferroni p-val: 1

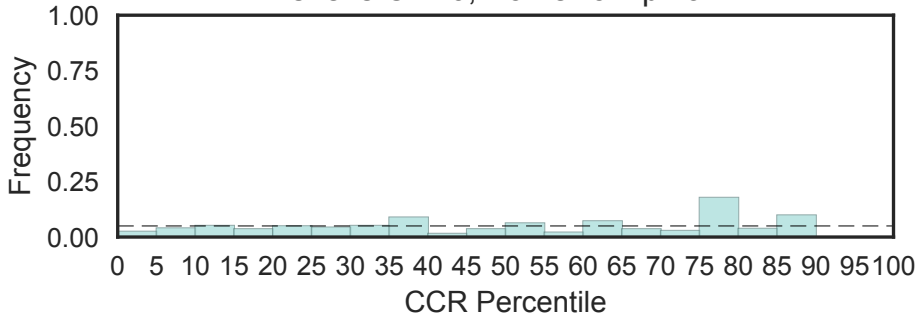

Peptide hormone  
(Hormone\_2, N=10)  
Fisher's OR: 0; Bonferroni p-val: 1

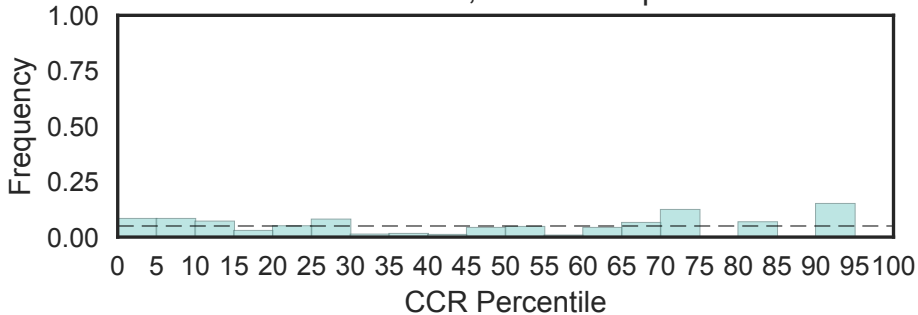



Pancreatic hormone peptide  
(Hormone\_3, N=3)

Fisher's OR: 2.85; Bonferroni p-val: 1

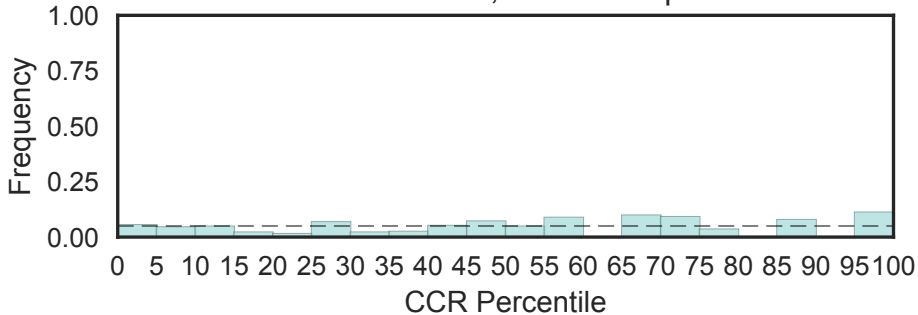

Neurohypophysial hormones, N-terminal Domain  
(Hormone\_4, N=2)

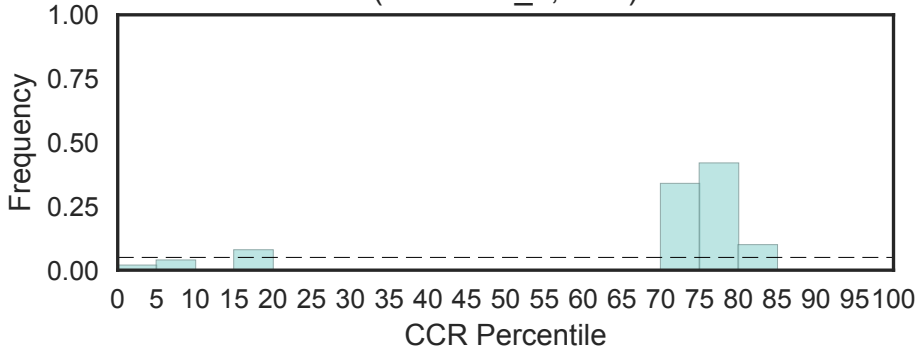

# Neurohypophysial hormones, C-terminal Domain (Hormone\_5, N=2)

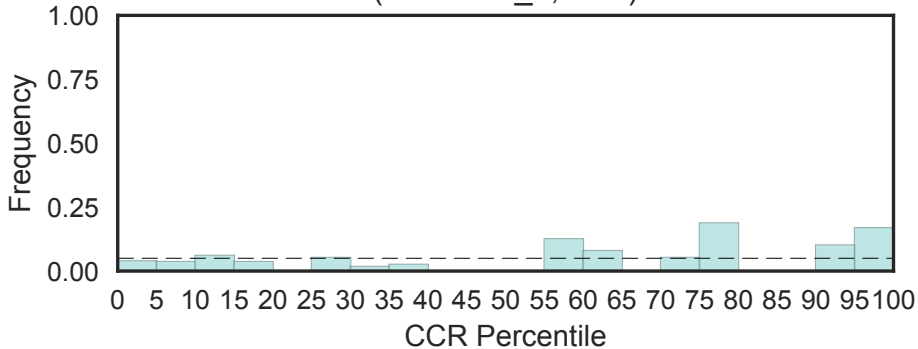

# Glycoprotein hormone (Hormone\_6, N=1)

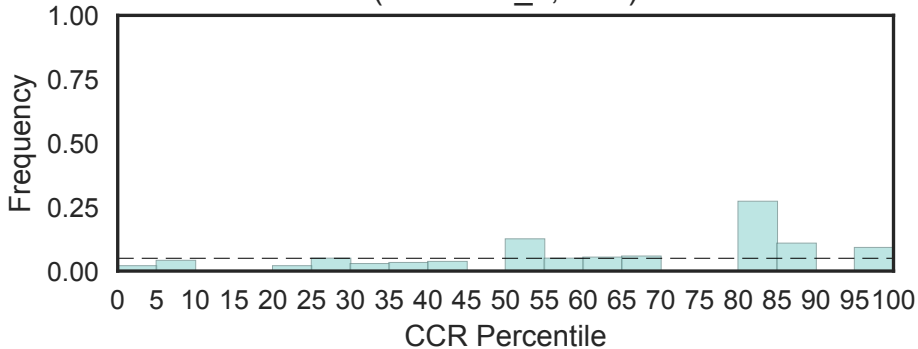

Ligand-binding domain of nuclear hormone receptor  
(Hormone\_recep, N=47)

Fisher's OR: 3.29; Bonferroni p-val: 3.05e-12

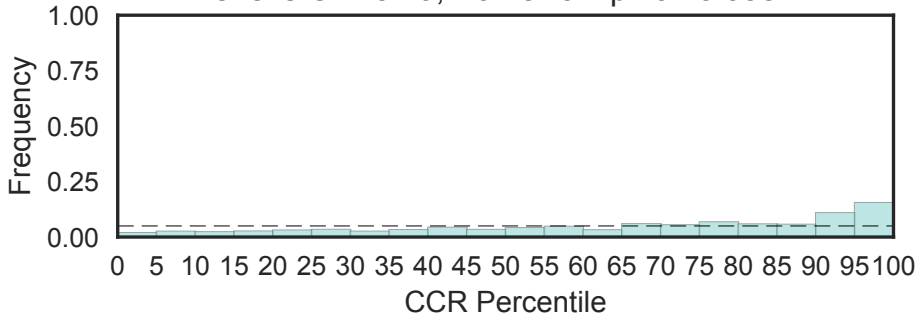

Hox9 activation region  
(Hox9\_act, N=5)

Fisher's OR: 0.56; Bonferroni p-val: 1

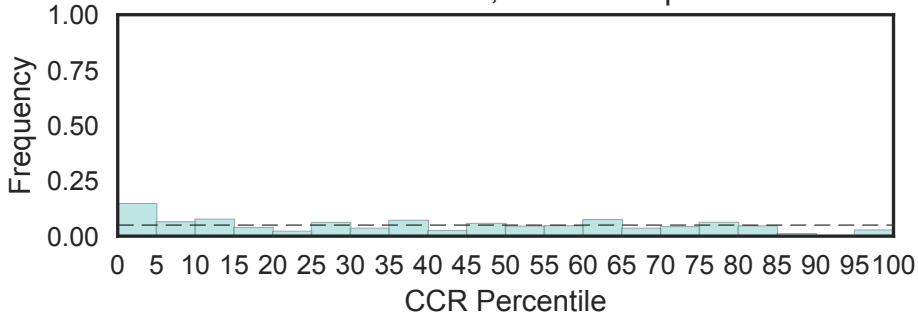

# Hox protein A13 N terminal

(HoxA13\_N, N=4)

Fisher's OR: 0; Bonferroni p-val: 1

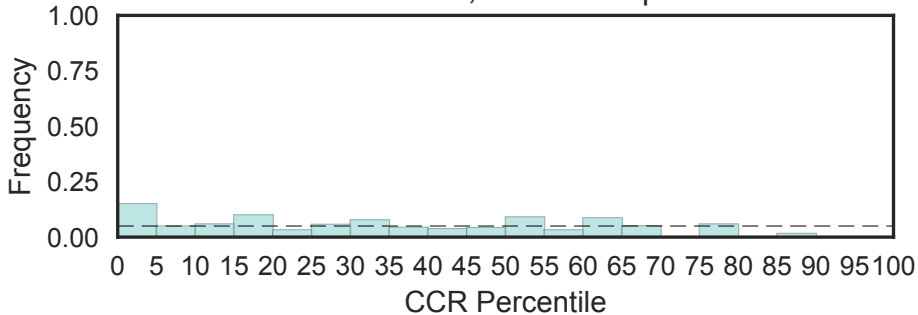

HpchH/Hpal aldolase/citrate lyase family  
(HpchH\_Hpal, N=1)

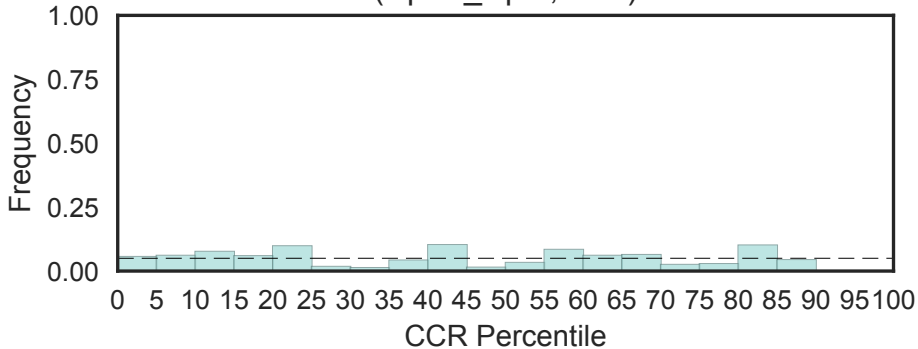



# Hepatocyte growth factor-regulated tyrosine kinase substrate (Hrs\_helical, N=1)

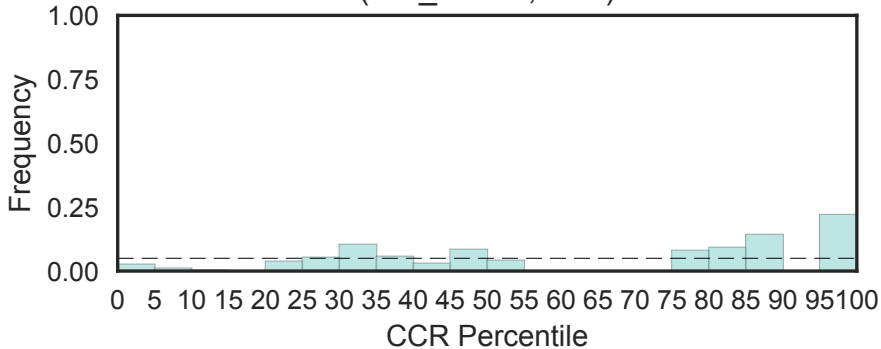

Humanin family  
(Humanin, N=8)

Fisher's OR: 0; Bonferroni p-val: 1

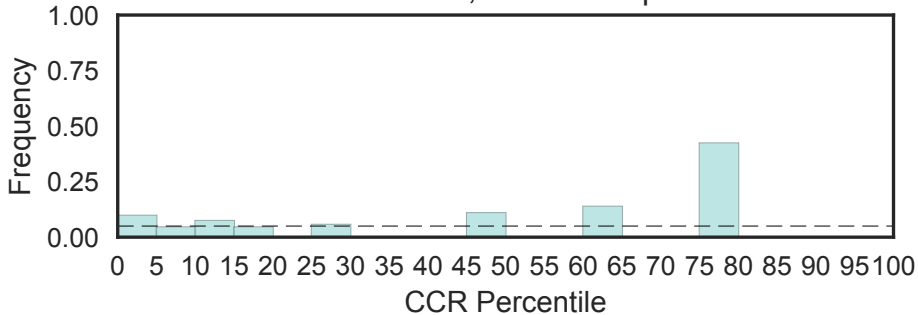

# Hus1-like protein (Hus1, N=2)

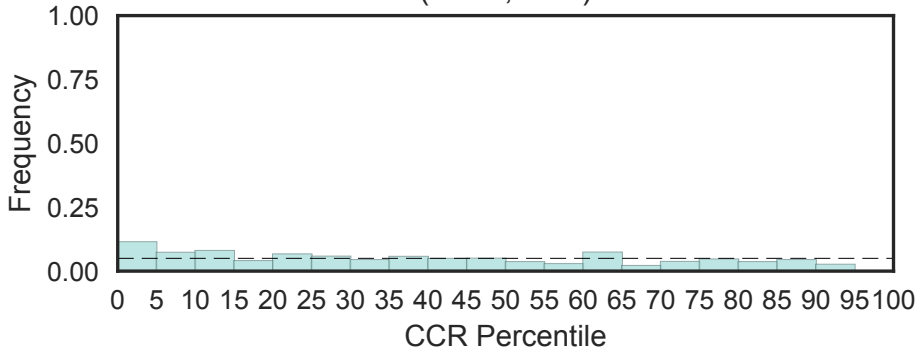

# Hydrogenase-1 expression protein HyaE (HyaE, N=1)

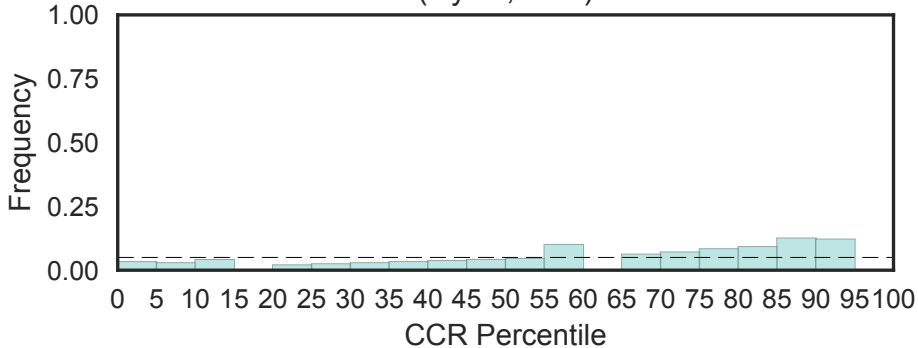

# Hyccin

(Hyccin, N=2)

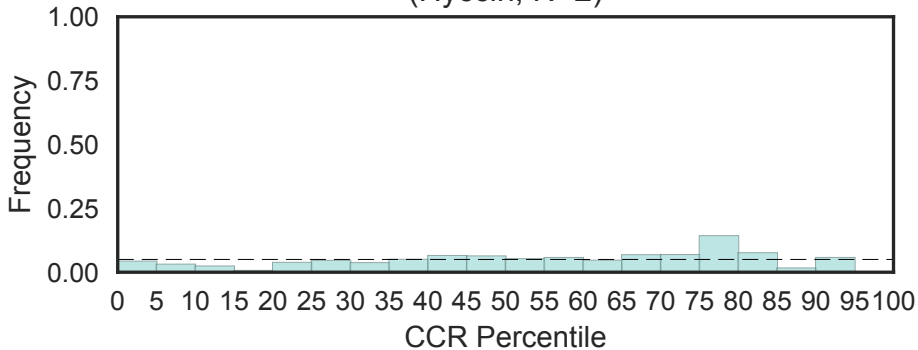

# Propeller

(Hyd\_WA, N=14)

Fisher's OR: 0.845; Bonferroni p-val: 1

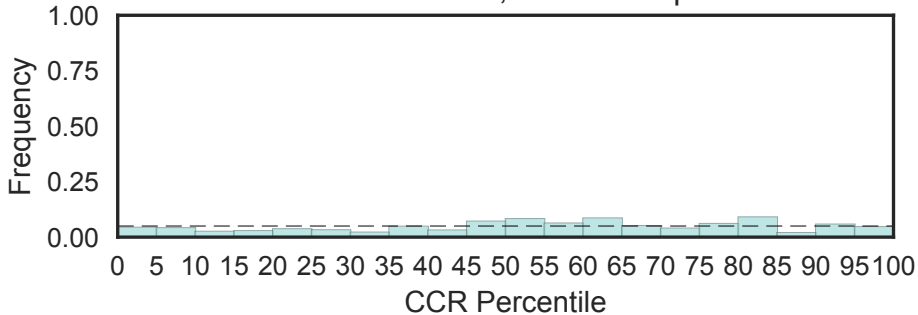

Hydantoinase/oxoprolinase N-terminal region  
(Hydant\_A\_N, N=1)

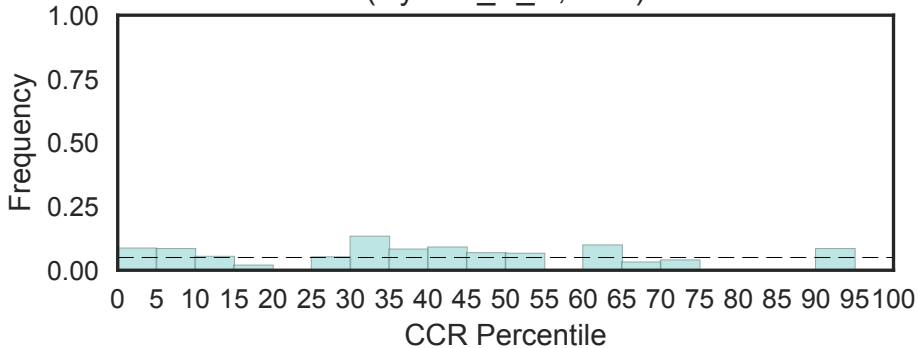

Hydantoinase/oxoprolinase  
(Hydantoinase\_A, N=1)

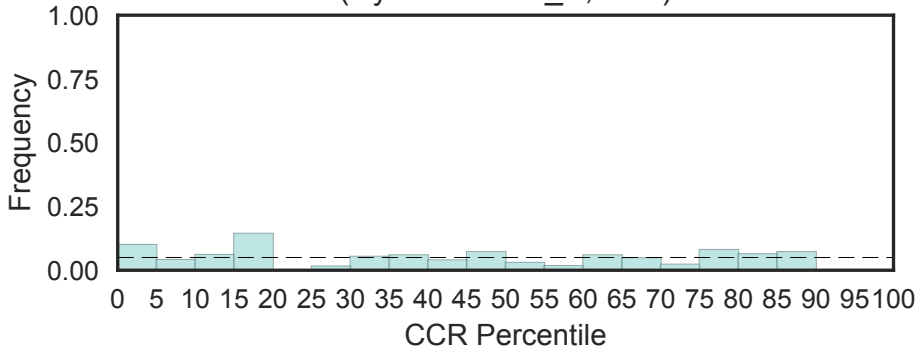



# Hydantoinase B/oxoprolinase (Hydantoinase\_B, N=1)

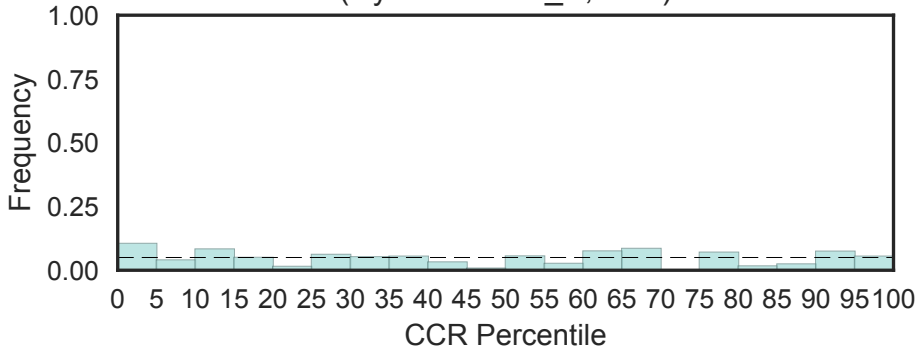

haloacid dehalogenase-like hydrolase  
(Hydrolase, N=39)

Fisher's OR: 1.23; Bonferroni p-val: 1

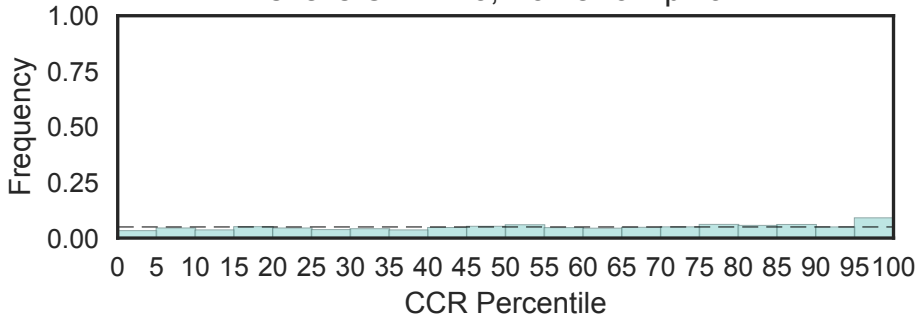

haloacid dehalogenase-like hydrolase  
(Hydrolase\_3, N=9)

Fisher's OR: 2.65; Bonferroni p-val: 1

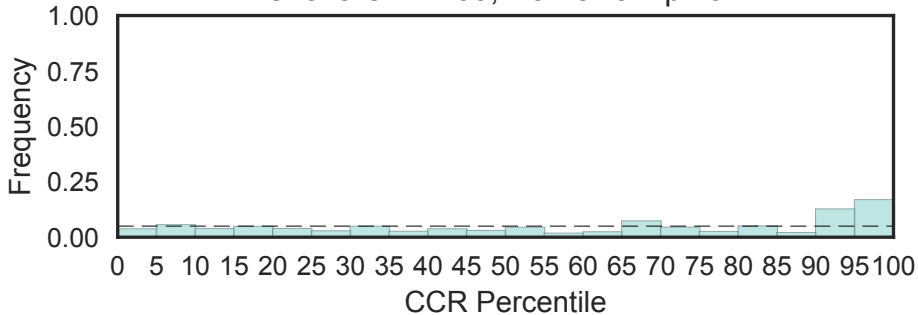

Serine aminopeptidase, S33  
(Hydrolase\_4, N=26)

Fisher's OR: 0.774; Bonferroni p-val: 1

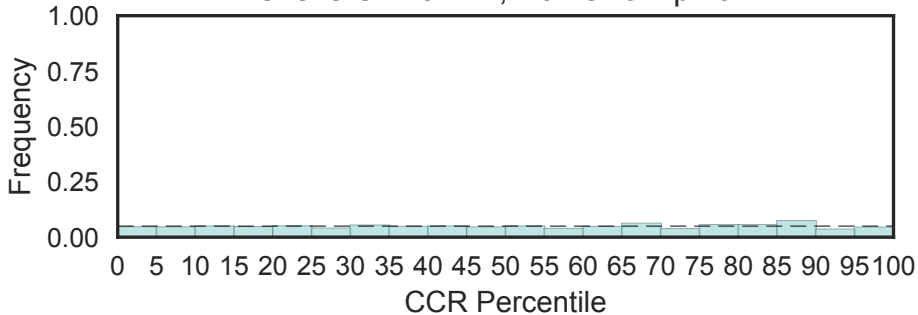

Haloacid dehalogenase-like hydrolase  
(Hydrolase\_6, N=5)

Fisher's OR: 0; Bonferroni p-val: 1

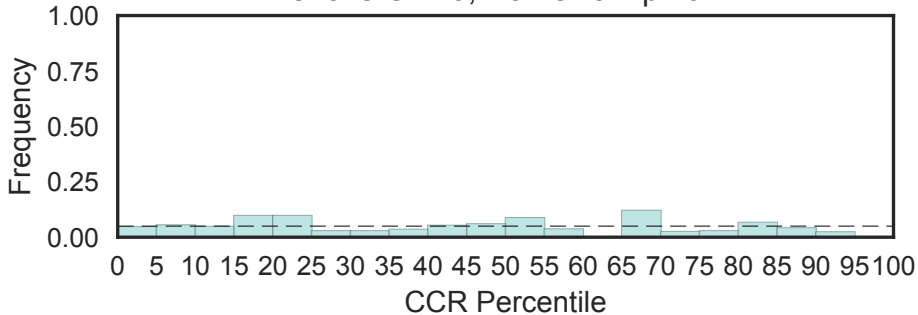

HAD-hyrolase-like  
(Hydrolase\_like, N=6)  
Fisher's OR: 0; Bonferroni p-val: 1

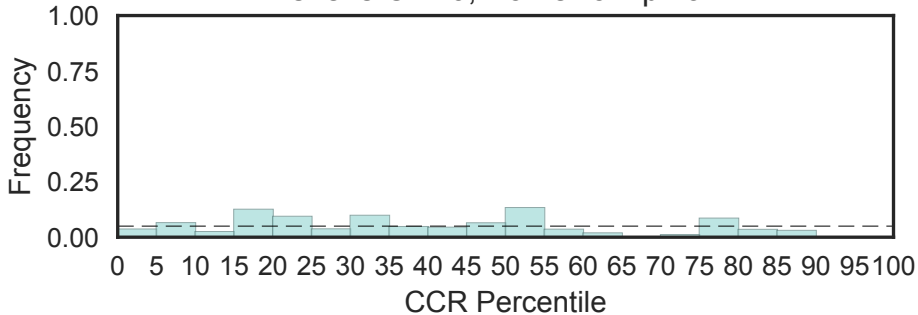

Immunoglobulin I-set domain  
(I-set, N=796)

Fisher's OR: 0.3883; Bonferroni p-val: 2.31e-23

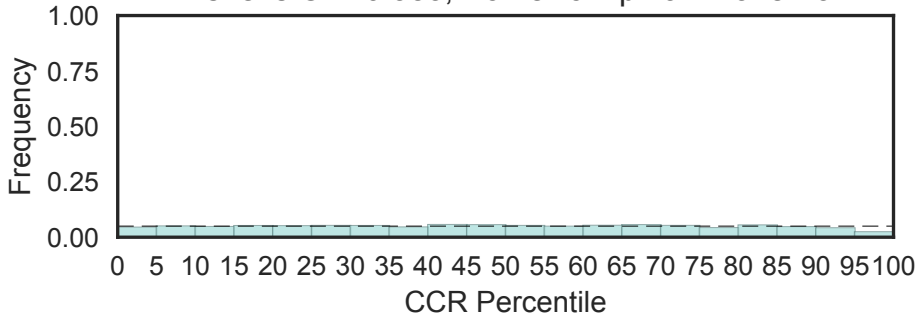

Mitochondrial ATPase inhibitor, IATP  
(IATP, N=1)

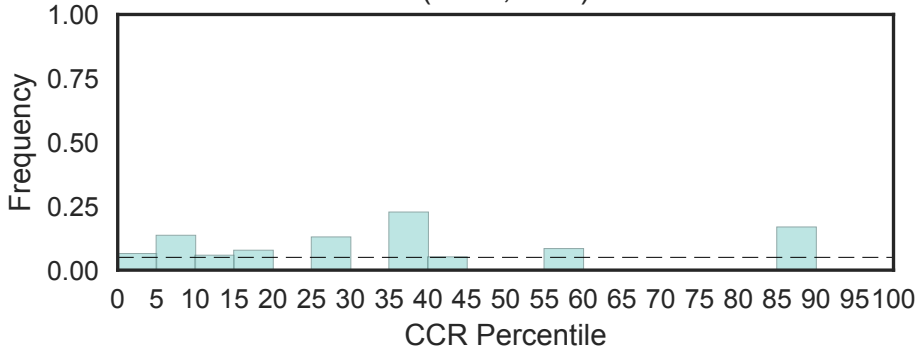



Importin beta binding domain  
(IBB, N=7)

Fisher's OR: 2.43; Bonferroni p-val: 1

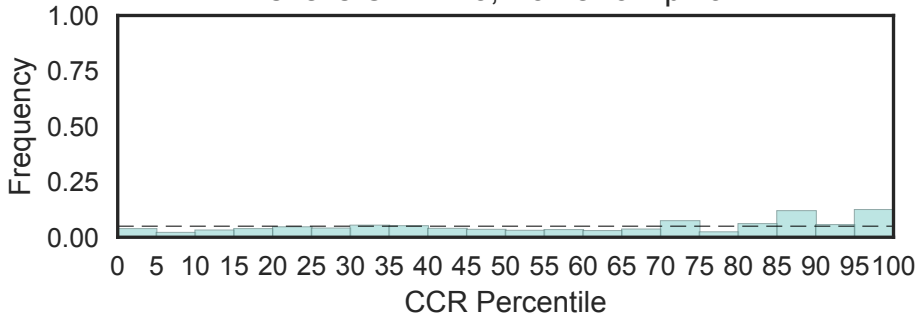

Importin-beta N-terminal domain  
(IBN\_N, N=16)

Fisher's OR: 5.17; Bonferroni p-val: 0.0192

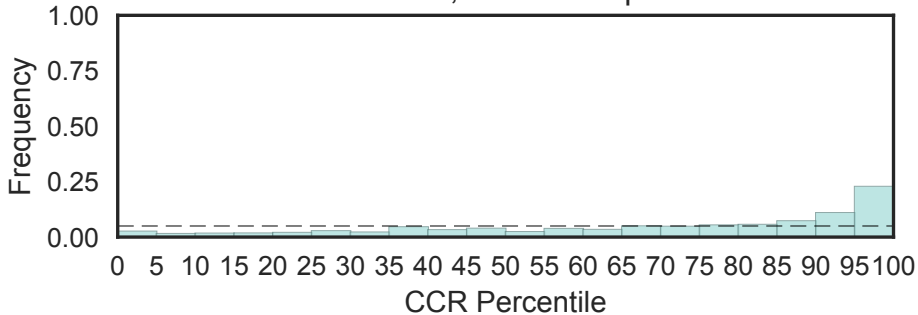

IBR domain, a half RING-finger domain  
(IBR, N=25)

Fisher's OR: 4.64; Bonferroni p-val: 0.0126

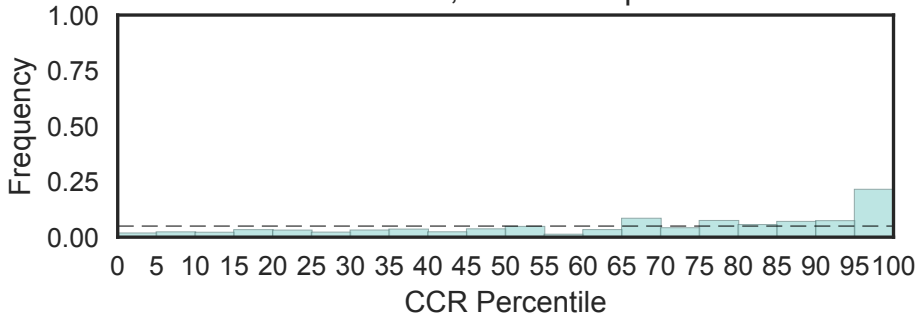

Islet cell autoantigen ICA69, C-terminal domain  
(ICA69, N=3)

Fisher's OR: 0; Bonferroni p-val: 1

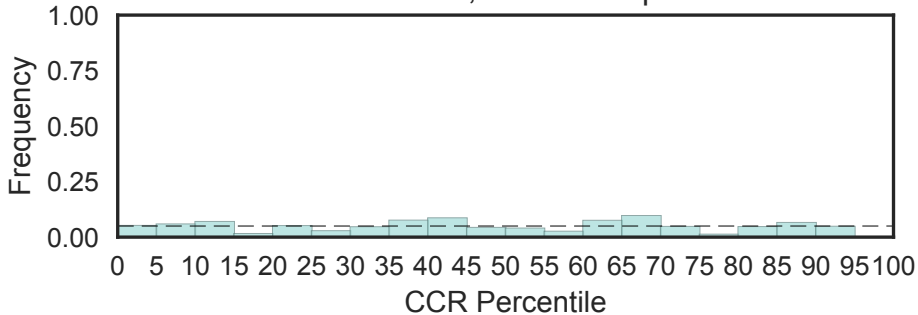

Intercellular adhesion molecule (ICAM), N-terminal domain  
(ICAM\_N, N=5)

Fisher's OR: 0; Bonferroni p-val: 1

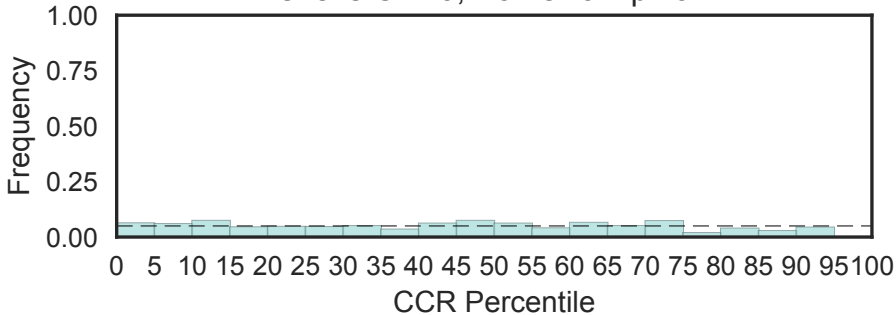

Beta-1 integrin binding protein  
(ICAP-1\_inte\_bdg, N=1)

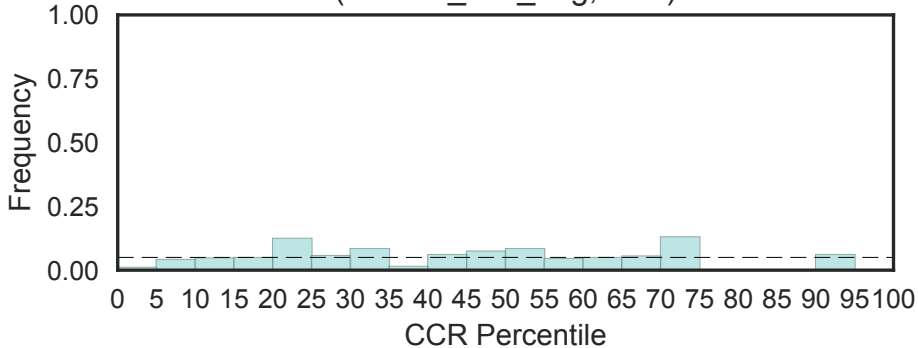

# Beta-catenin-interacting protein ICAT (ICAT, N=2)

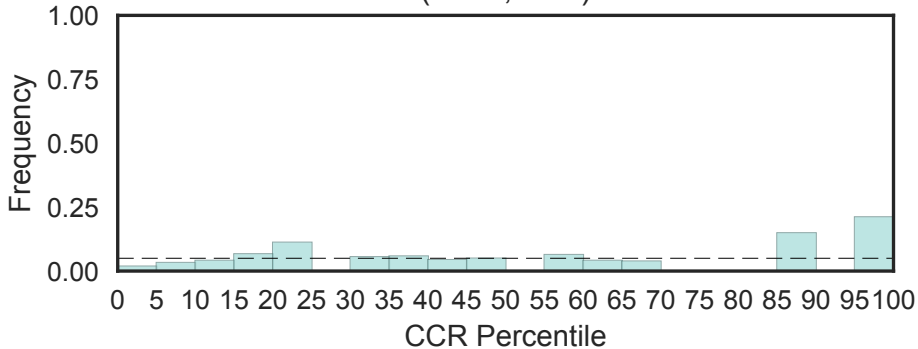

# Isoprenylcysteine carboxyl methyltransferase (ICMT) family (ICMT, N=1)

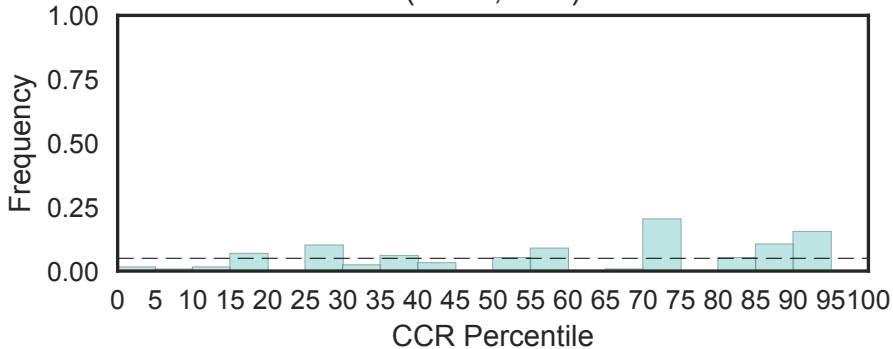



# Indoleamine 2,3-dioxygenase (IDO, N=2)

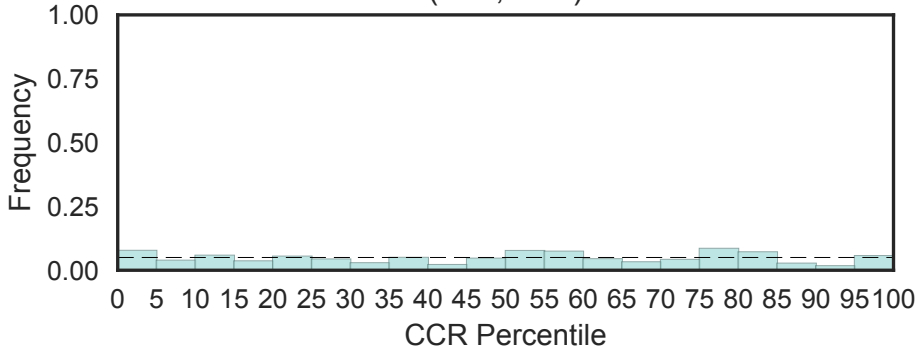

Immediate early response protein (IER)  
(IER, N=4)

Fisher's OR: 0.746; Bonferroni p-val: 1

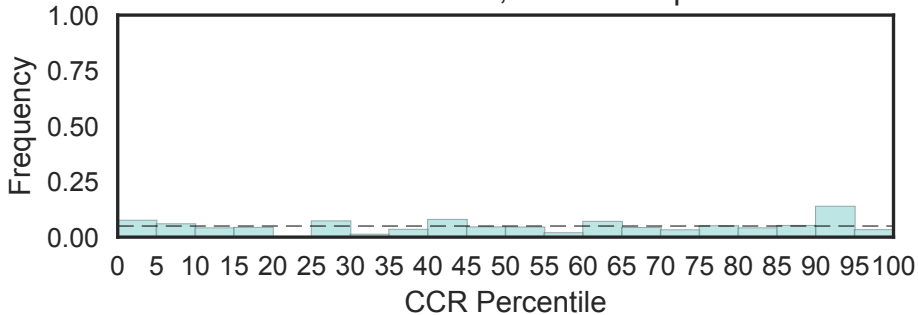

Translation-initiation factor 2  
(IF-2, N=2)

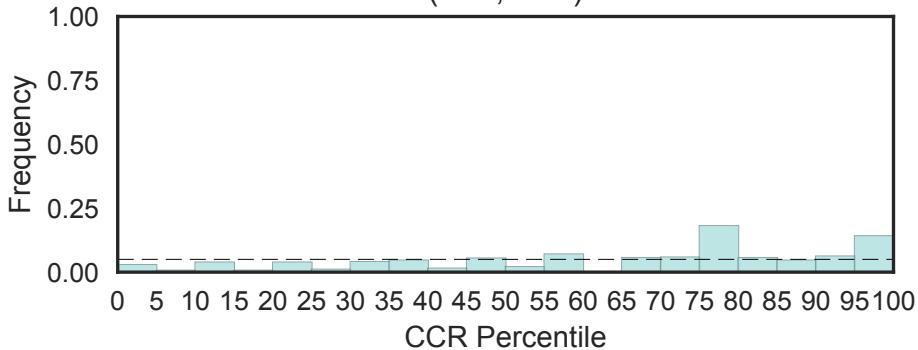

Initiation factor 2 subunit family  
(IF-2B, N=4)

Fisher's OR: 0.659; Bonferroni p-val: 1

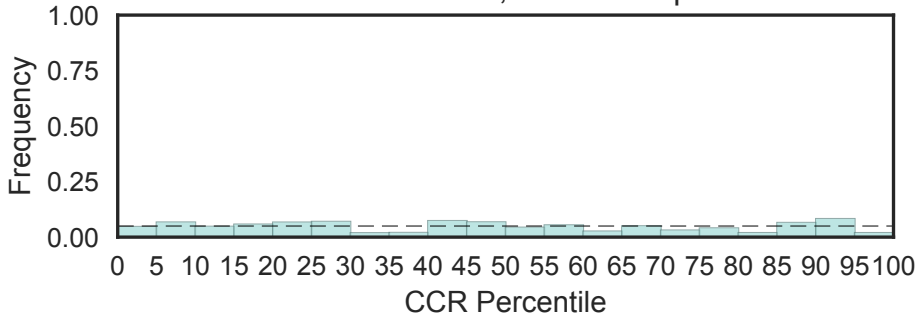

Translation initiation factor IF-3, C-terminal domain  
(IF3\_C, N=1)

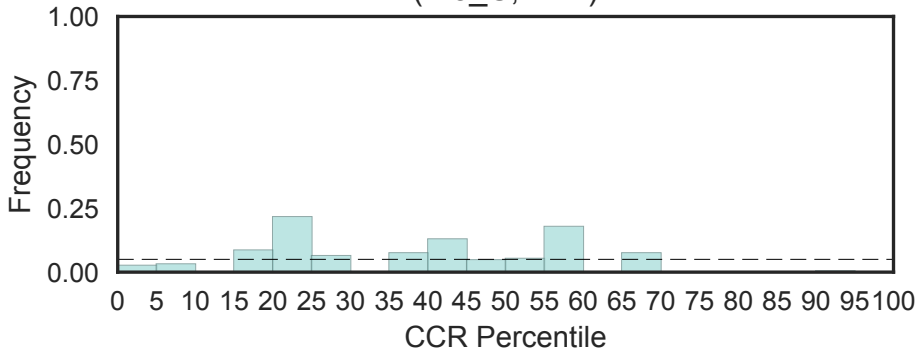

Translation initiation factor IF-3, N-terminal domain  
(IF3\_N, N=1)

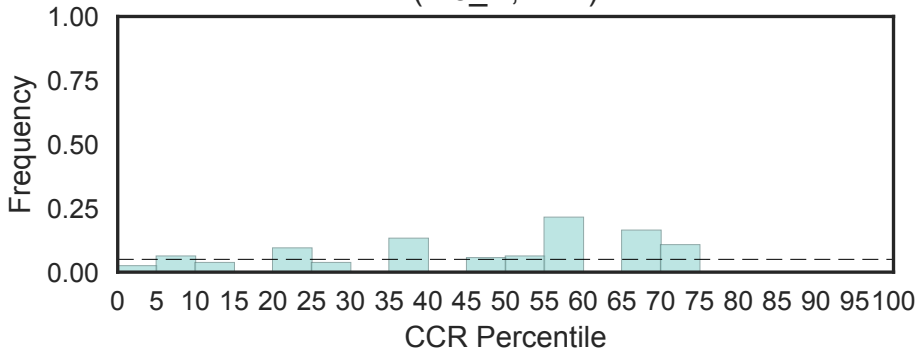

Eukaryotic initiation factor 4E  
(IF4E, N=4)

Fisher's OR: 4.41; Bonferroni p-val: 1

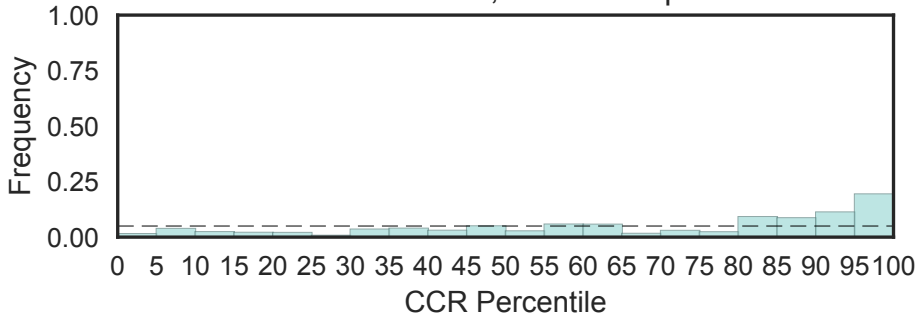

# Interferon gamma (IFN-gamma, N=1)

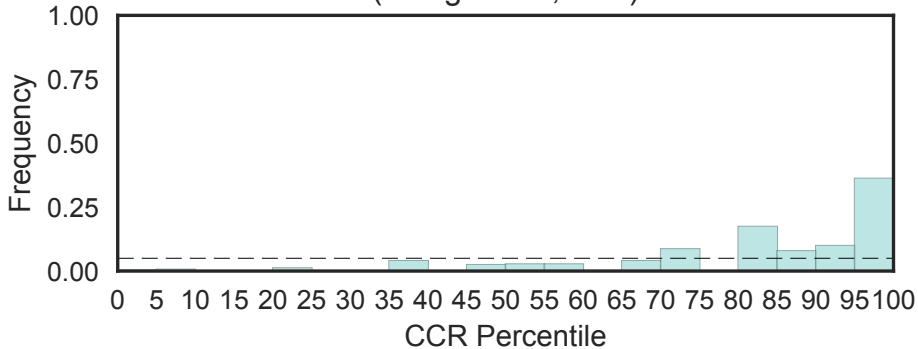



Interferon gamma receptor (IFNGR1)  
(IFNGR1, N=1)

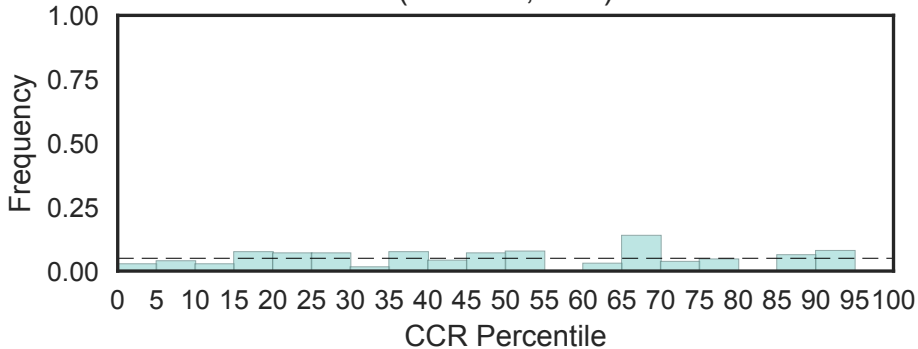

Interferon-induced 35 kDa protein (IFP 35) N-terminus  
(IFP\_35\_N, N=2)

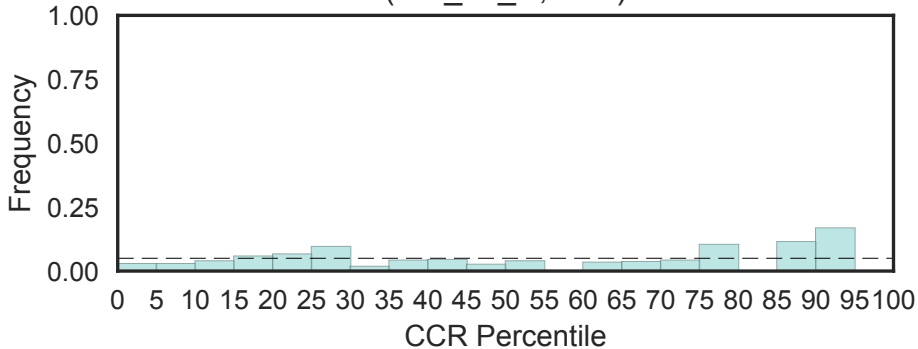

# Interferon-related developmental regulator (IFRD) (IFRD, N=2)

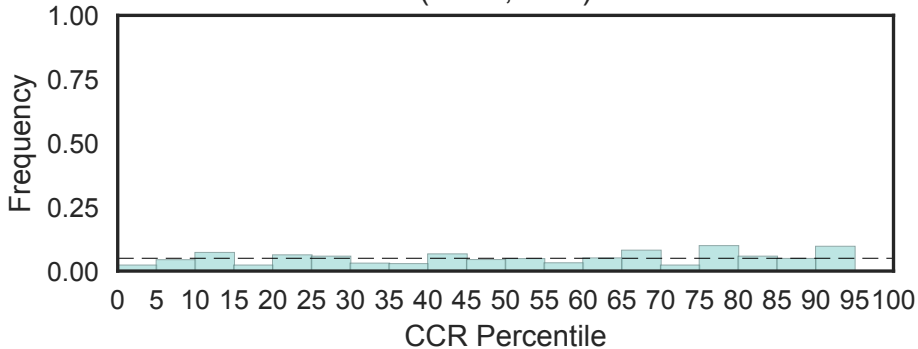

Interferon-related protein conserved region  
(IFRD\_C, N=2)

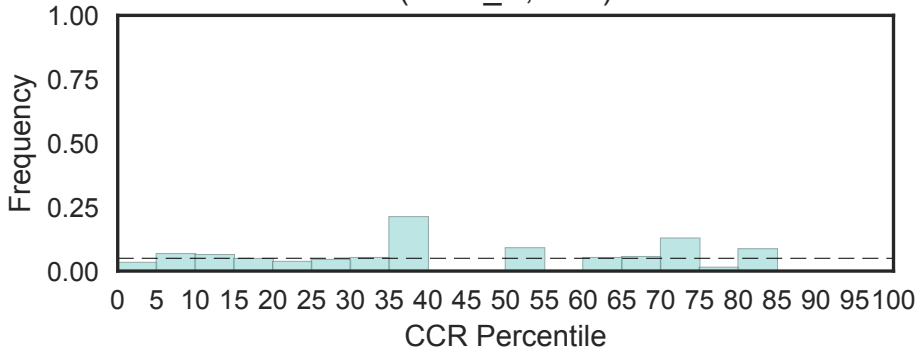

Intraflagellar transport complex B, subunit 20  
(IFT20, N=1)

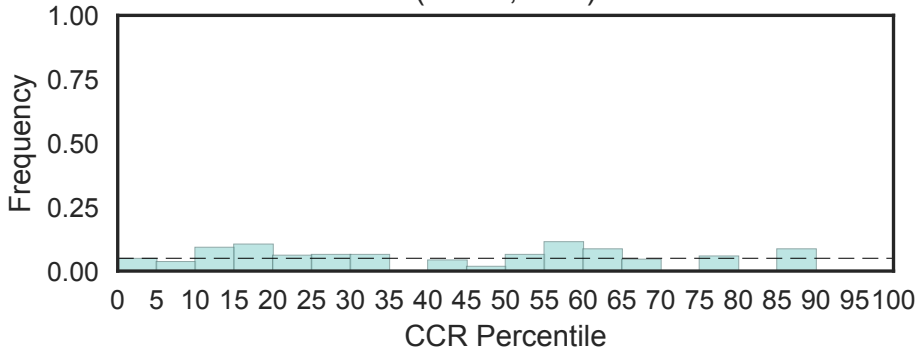

# Intraflagellar transport protein 43 (IFT43, N=1)

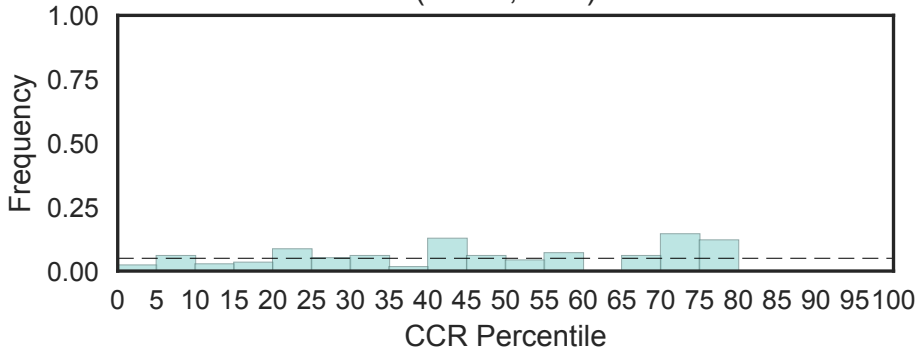

Intraflagellar transport complex B protein 46 C terminal  
(IFT46\_B\_C, N=2)

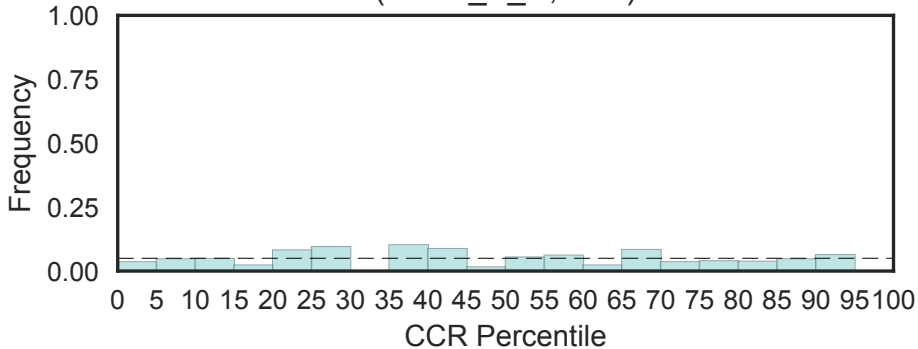

Intra-flagellar transport protein 57  
(IFT57, N=1)

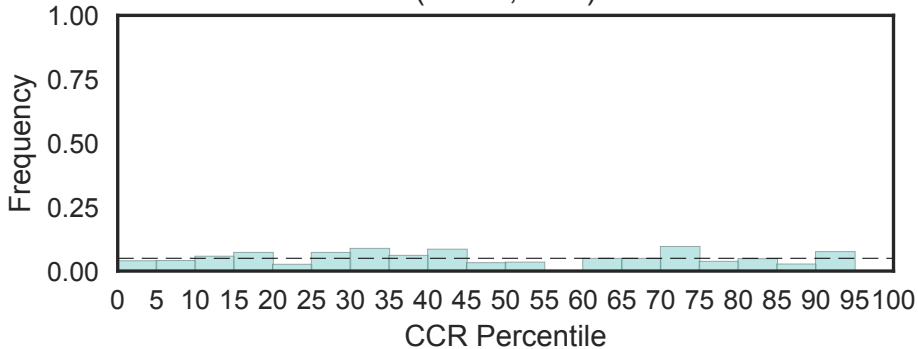



Insulin-like growth factor II E-peptide  
(IGF2\_C, N=1)

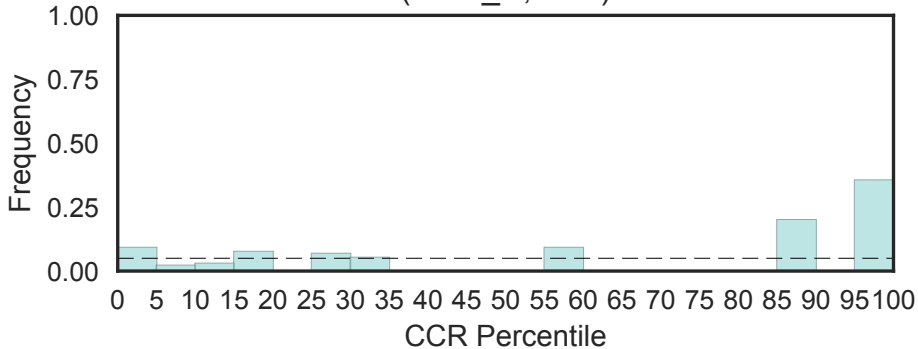

Insulin-like growth factor binding protein  
(IGFBP, N=19)

Fisher's OR: 0.498; Bonferroni p-val: 1

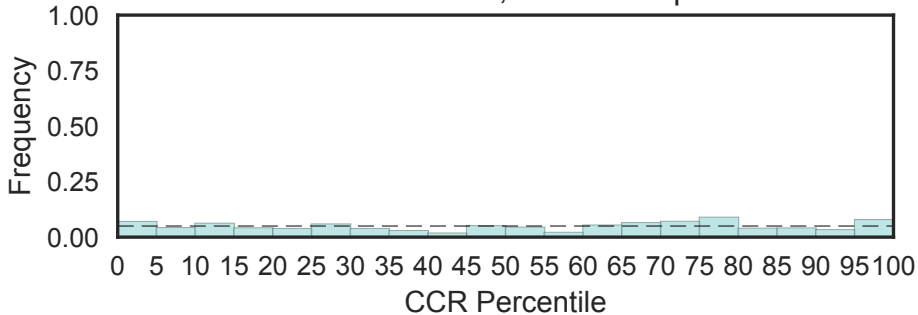

Insulin growth factor-like family  
(IGFL, N=4)

Fisher's OR: 0; Bonferroni p-val: 1

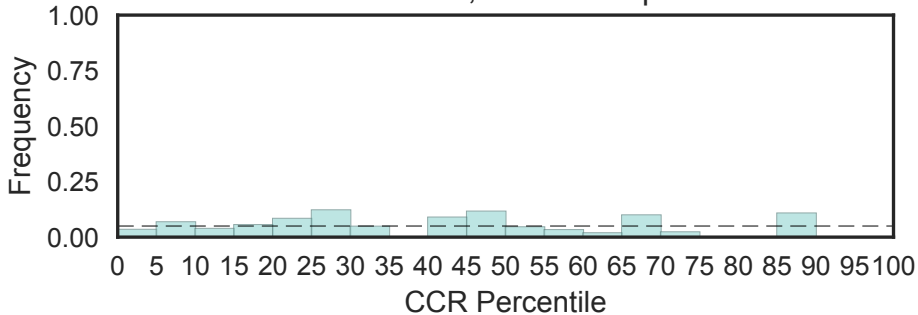

Intracellular hyaluronan-binding protein 4 N-terminal  
(IHABP4\_N, N=2)

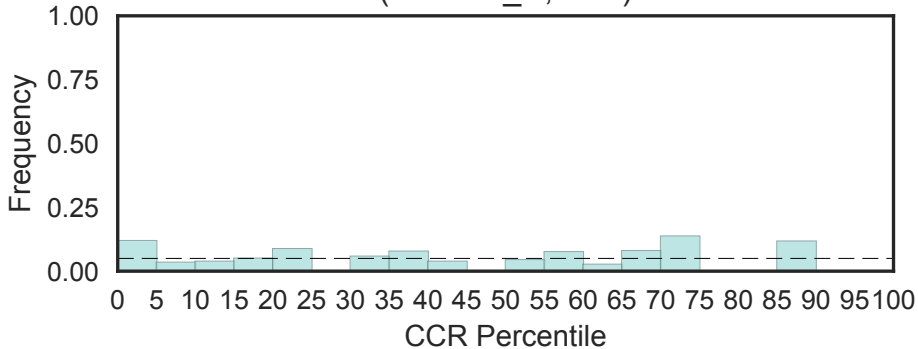

Interactor of HORMAD1 protein 1  
(IHO1, N=1)

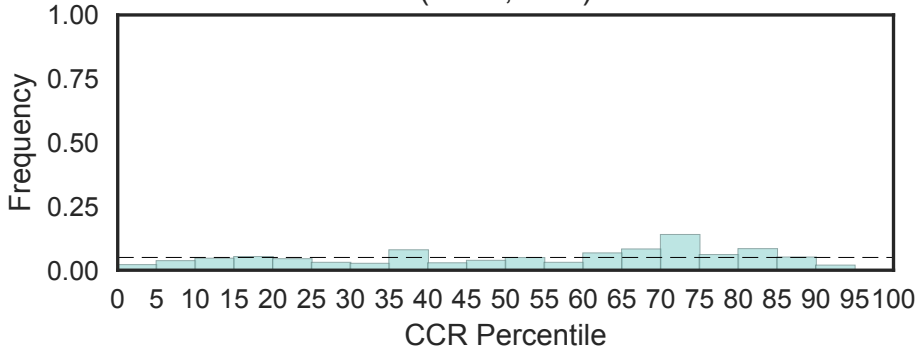

# Interferon-inducible GTPase (IIGP) (IIGP, N=2)

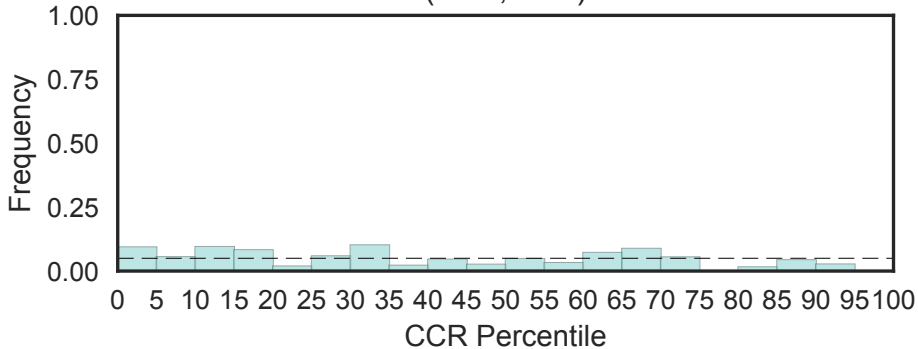

IKI3 family  
(IKI3, N=1)

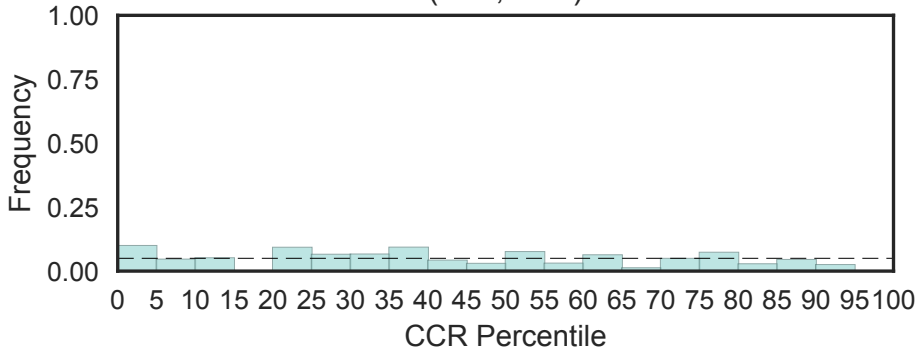

I-kappa-kinase-beta NEMO binding domain  
(IKKbetaNEMObind, N=2)

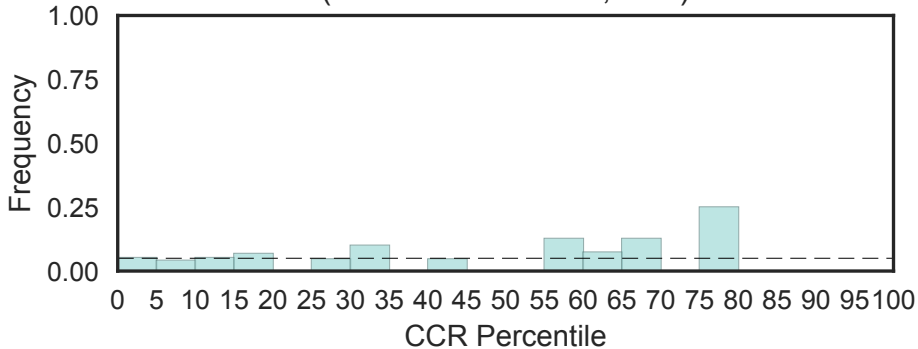



Interleukin-1 / 18  
(IL1, N=10)

Fisher's OR: 0.257; Bonferroni p-val: 1

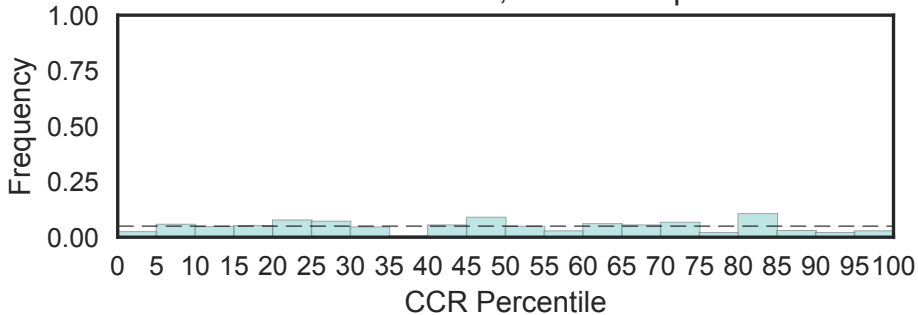

Interleukin 10  
(IL10, N=4)

Fisher's OR: 0.512; Bonferroni p-val: 1

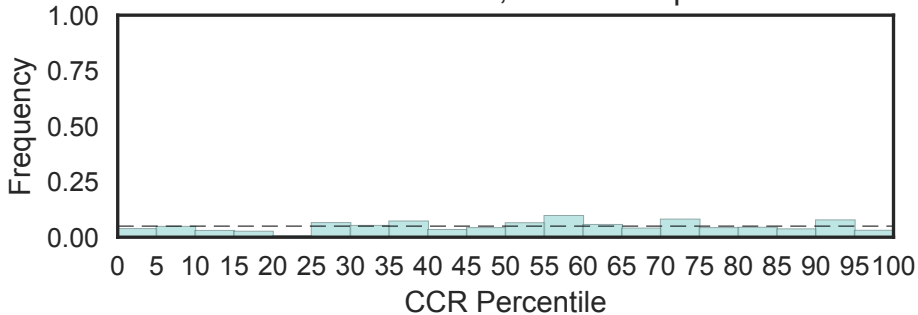

# Interleukin 11 (IL11, N=1)

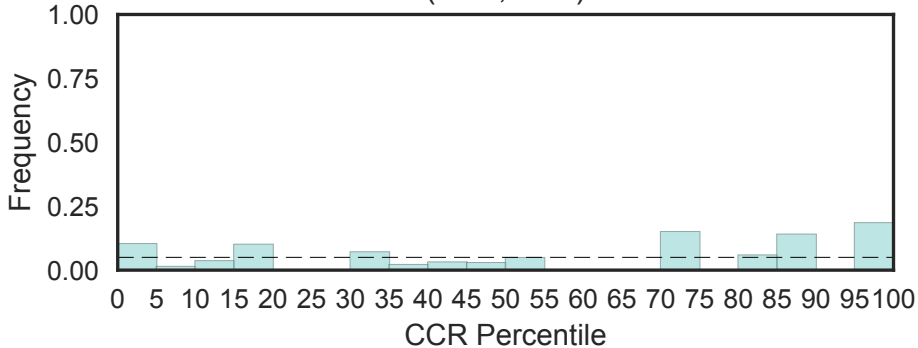

Interleukin-12 alpha subunit  
(IL12, N=1)

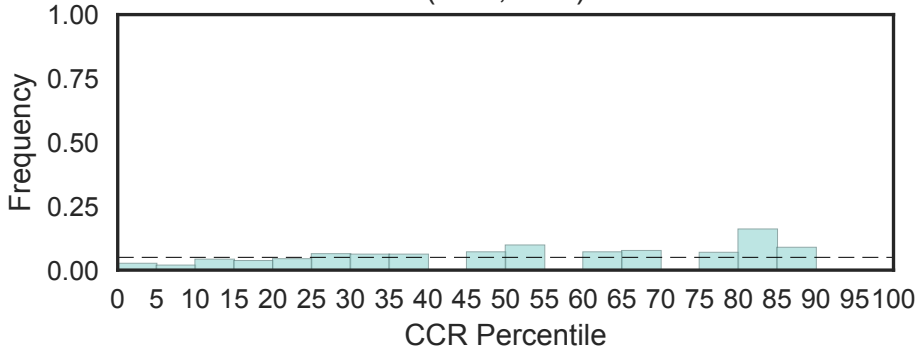

Cytokine interleukin-12p40 C-terminus  
(IL12p40\_C, N=1)

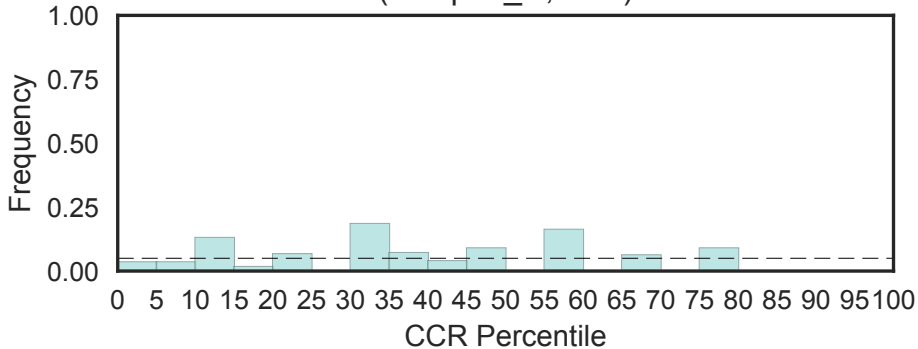

# Interleukin-13 (IL13, N=1)

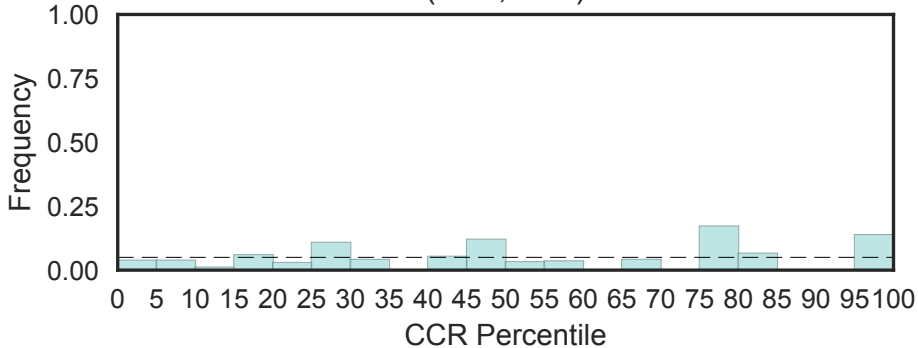

# Interleukin 15 (IL15, N=1)

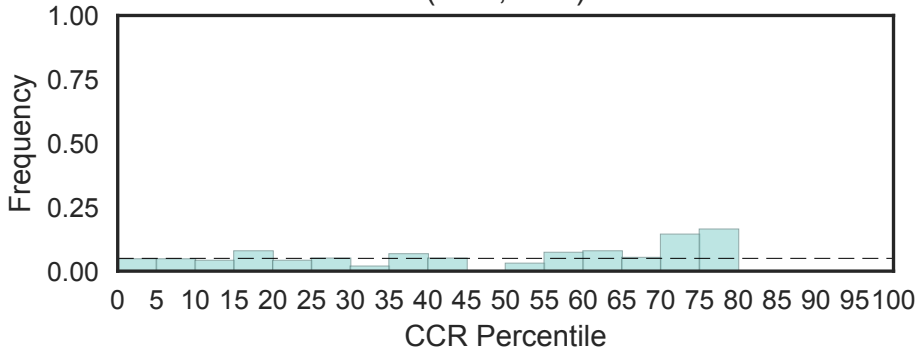

Interleukin-17  
(IL17, N=6)

Fisher's OR: 0; Bonferroni p-val: 1

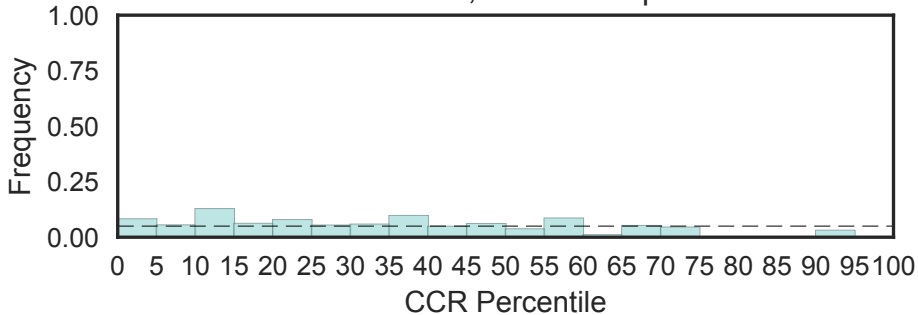



N-terminus of interleukin 17 receptor D  
(IL17R\_D\_N, N=1)

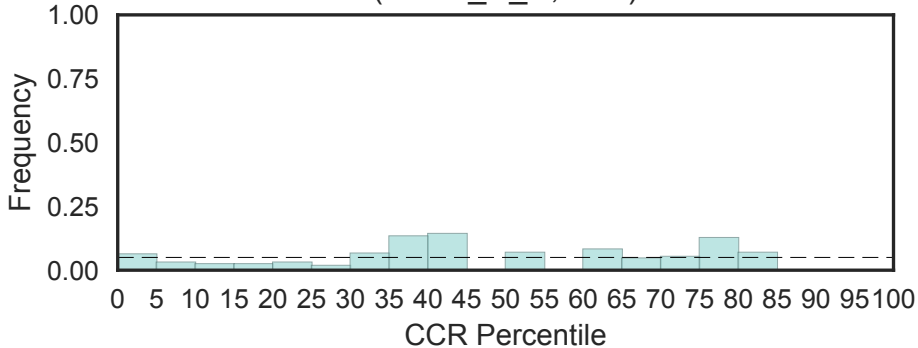

Interleukin-17 receptor, fibronectin-III-like domain 1  
(IL17R\_fnIII\_D1, N=2)

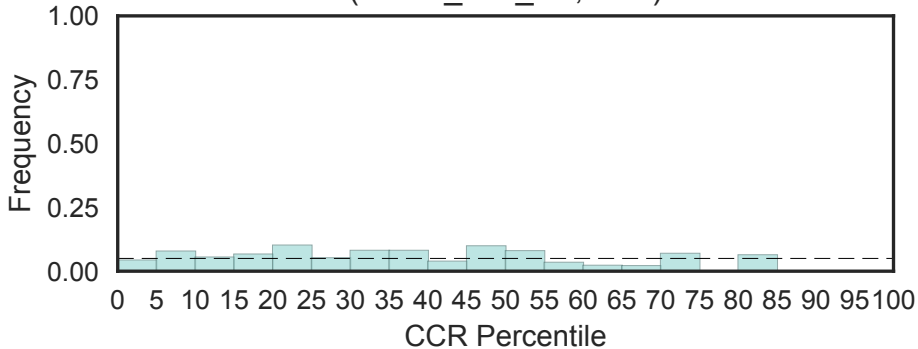

Interleukin 17 receptor D  
(IL17R\_fnIII\_D2, N=2)

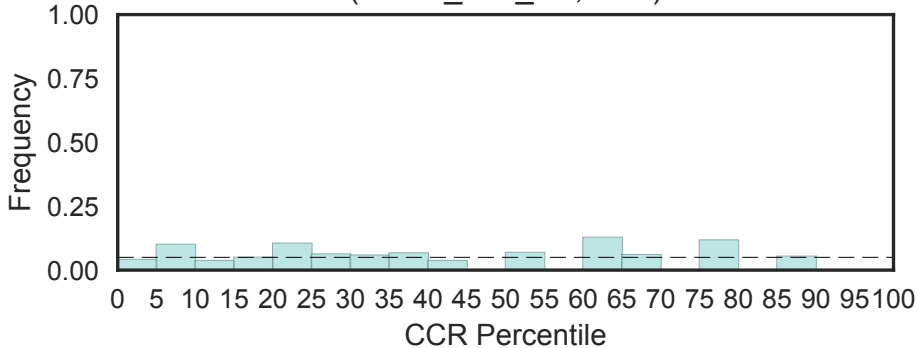

Interleukin-17 receptor extracellular region  
(IL17\_R\_N, N=3)

Fisher's OR: 0.264; Bonferroni p-val: 1

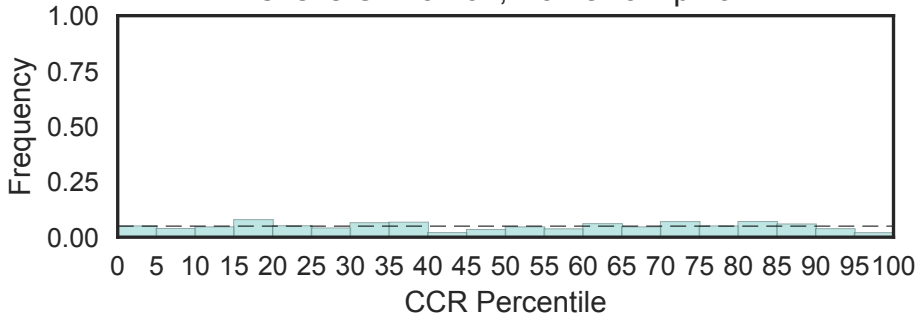

Interleukin-1 propeptide  
(IL1\_propep, N=2)

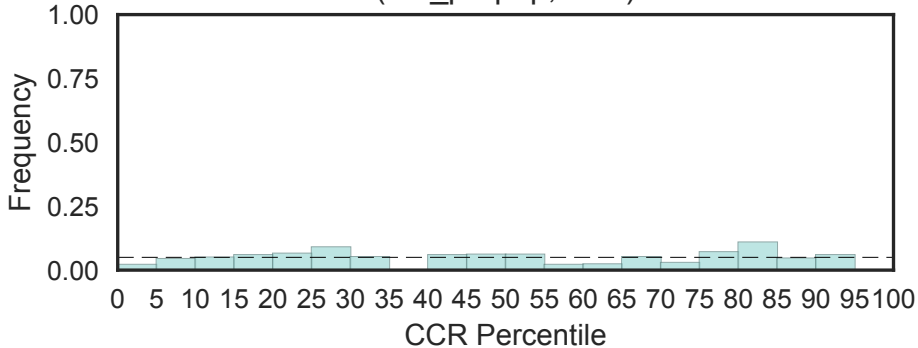

# Interleukin 2 (IL2, N=1)

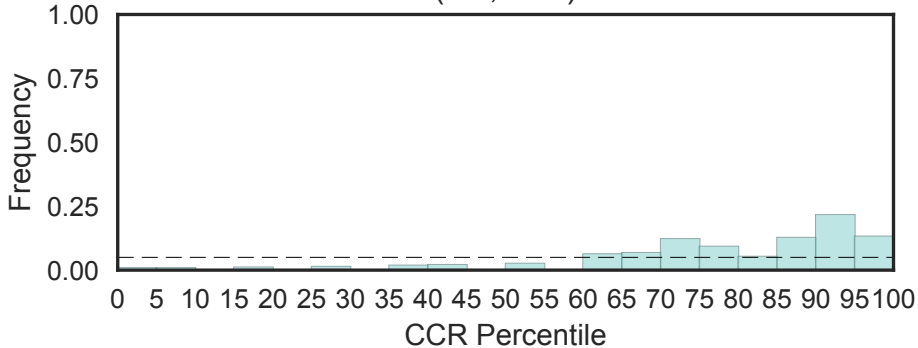

# Interleukin 22 IL-10-related T-cell-derived-inducible factor (IL22, N=2)

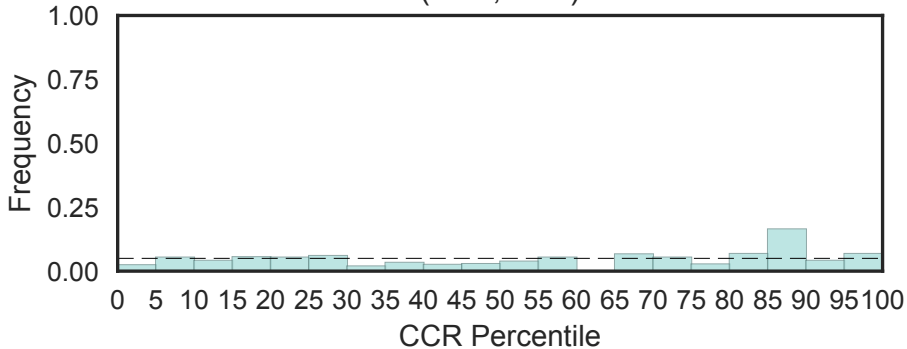

# Interleukin 23 subunit alpha (IL23, N=1)

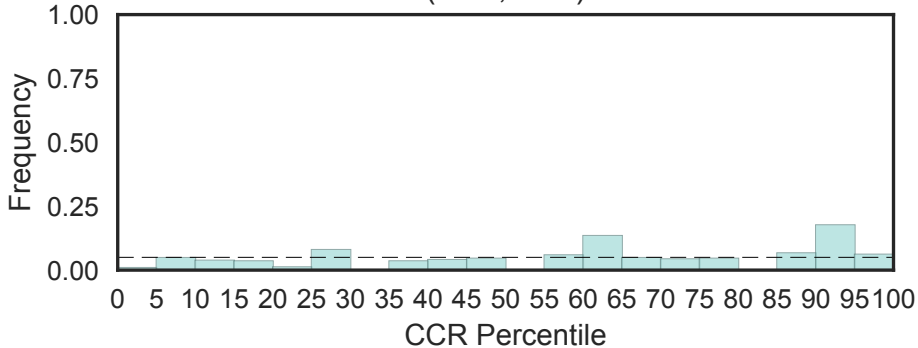



Interleukin-28A  
(IL28A, N=3)

Fisher's OR: 0; Bonferroni p-val: 1

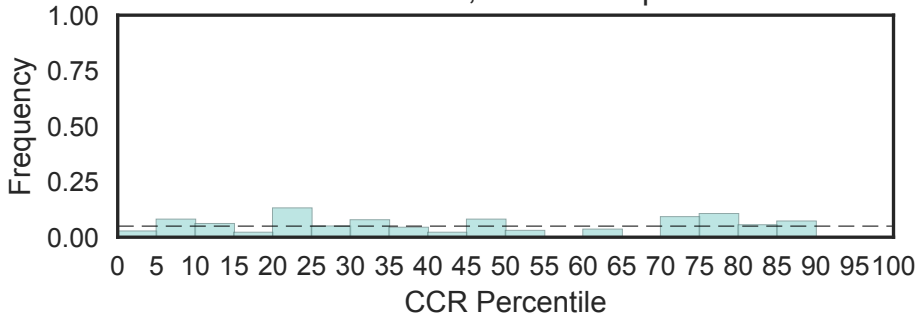

# Interleukin-3 (IL3, N=1)

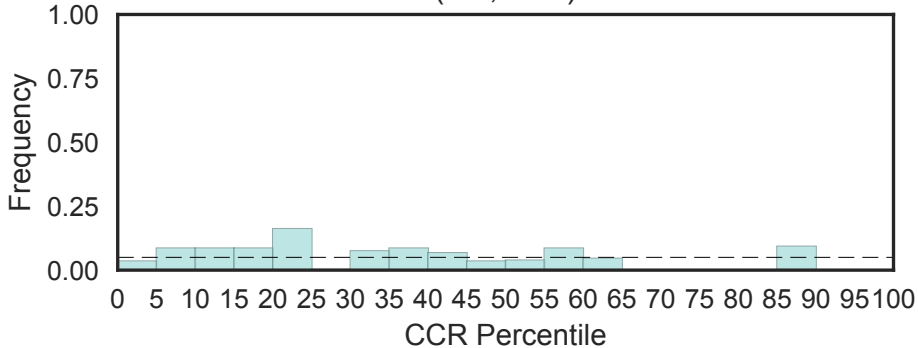

# Interleukin 31 (IL31, N=1)

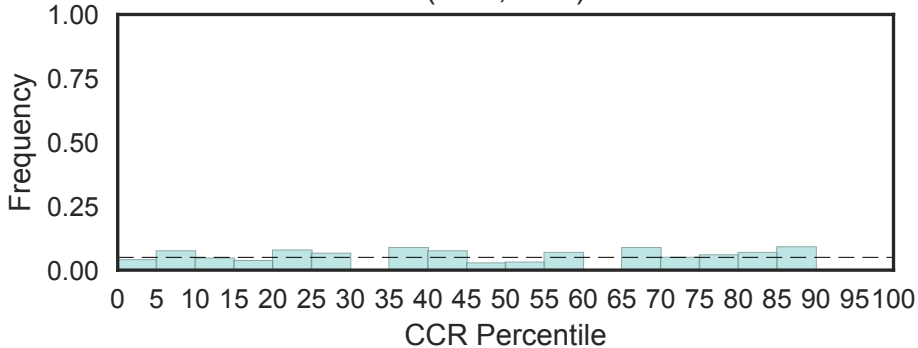

# Interleukin 32 (IL32, N=1)

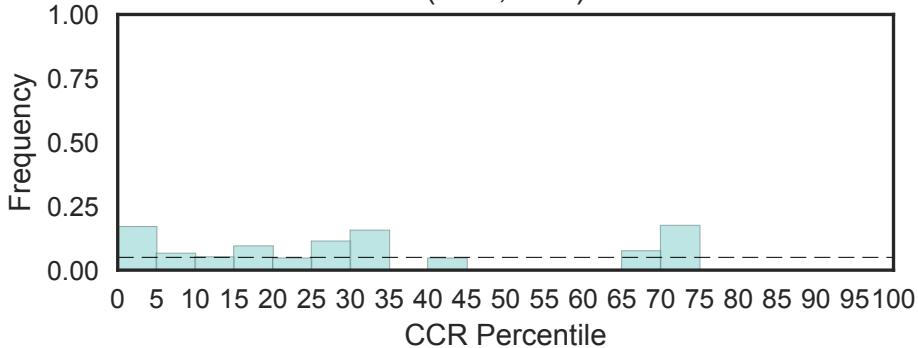

# Interleukin 33 (IL33, N=1)

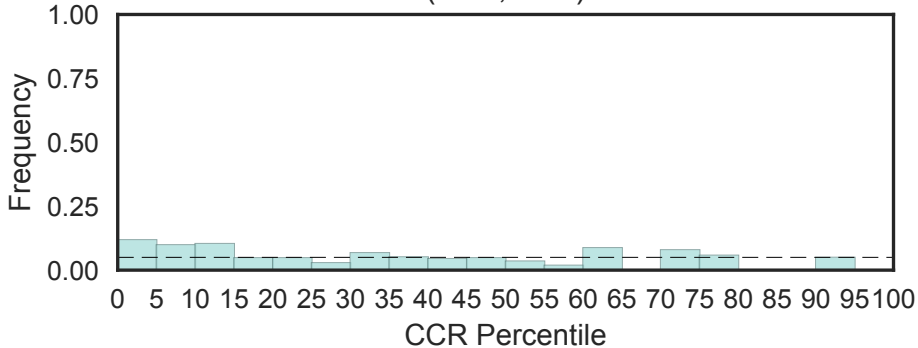

# Interleukin 34 (IL34, N=1)

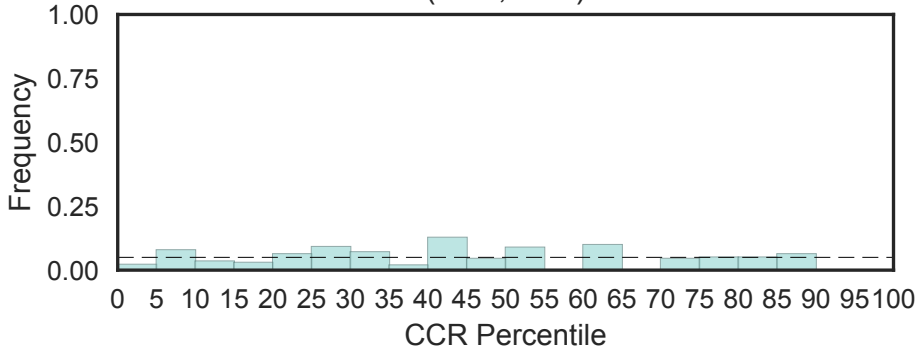

# Interleukin 4 (IL4, N=1)

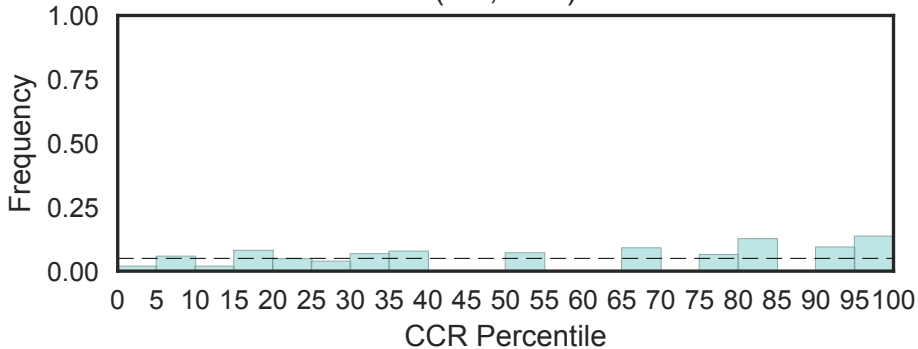

Interleukin-4 receptor alpha chain, N-terminal  
(IL4Ra\_N, N=1)

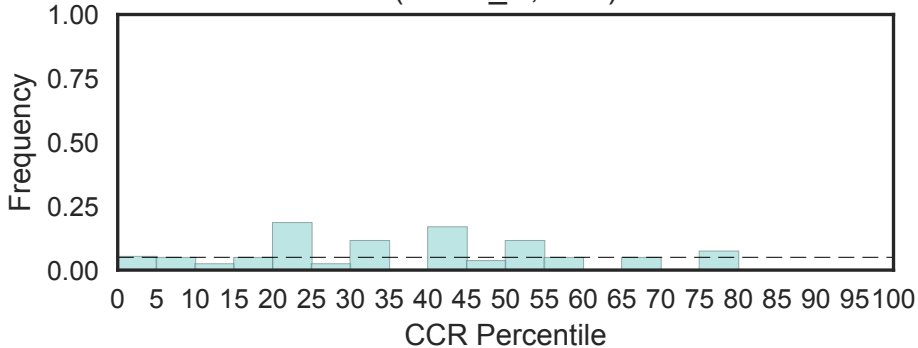



# Interleukin 5 (IL5, N=1)

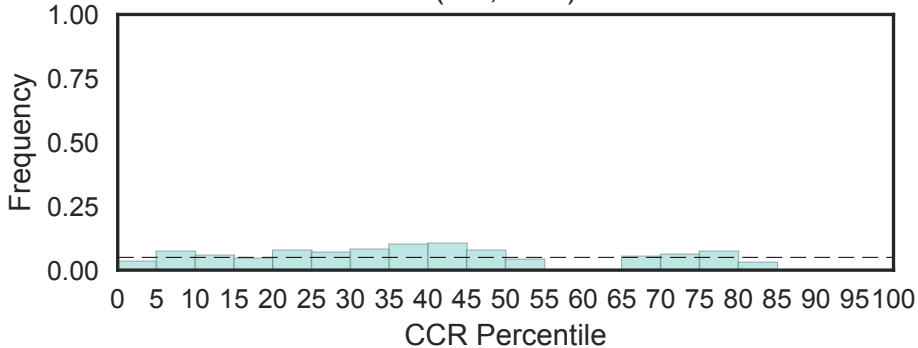

Interleukin-6/G-CSF/MGF family  
(IL6, N=1)

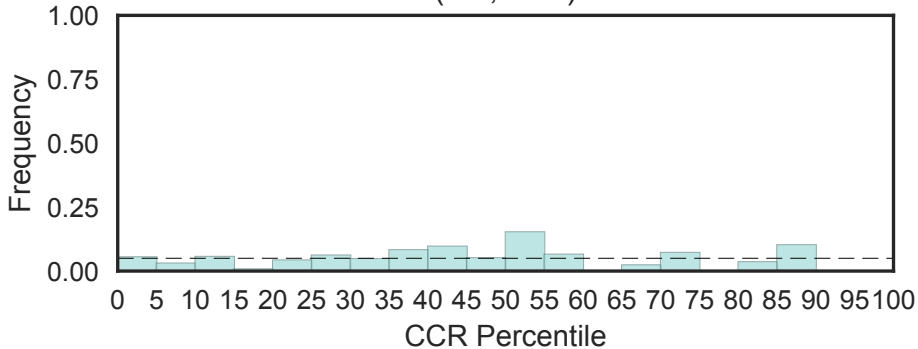

Interleukin-6 receptor alpha chain, binding  
(IL6Ra-bind, N=7)

Fisher's OR: 0; Bonferroni p-val: 1

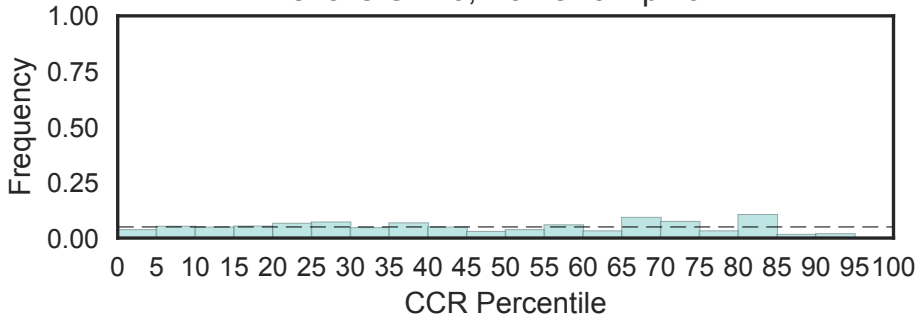

Interleukin 7/9 family  
(IL7, N=2)

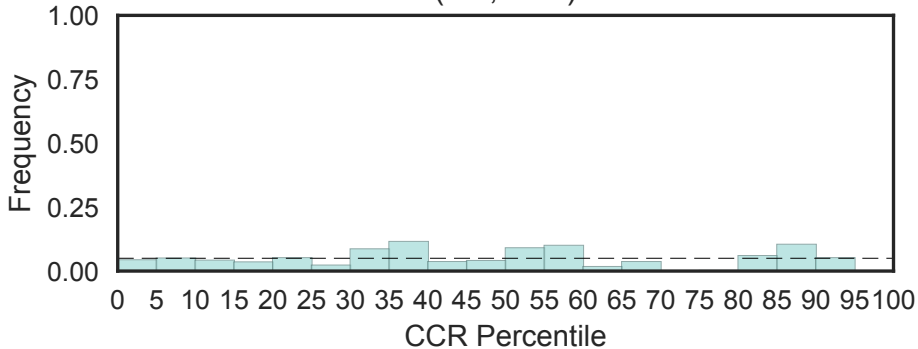

Small cytokines (intecrine/chemokine), interleukin-8 like  
(IL8, N=46)

Fisher's OR: 0.342; Bonferroni p-val: 1

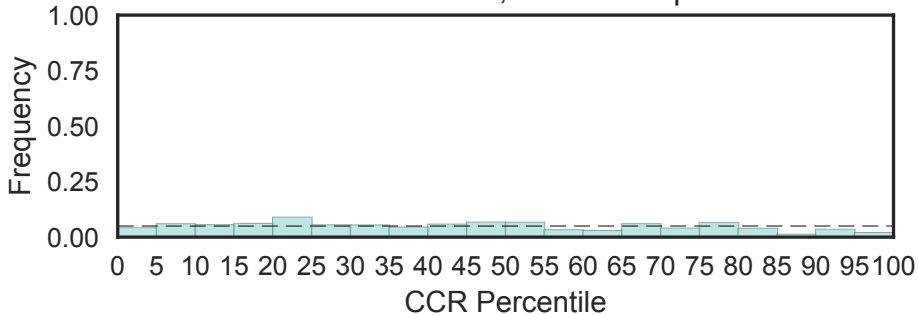

Interleukin-like EMT inducer  
(ILEI, N=8)

Fisher's OR: 0.424; Bonferroni p-val: 1

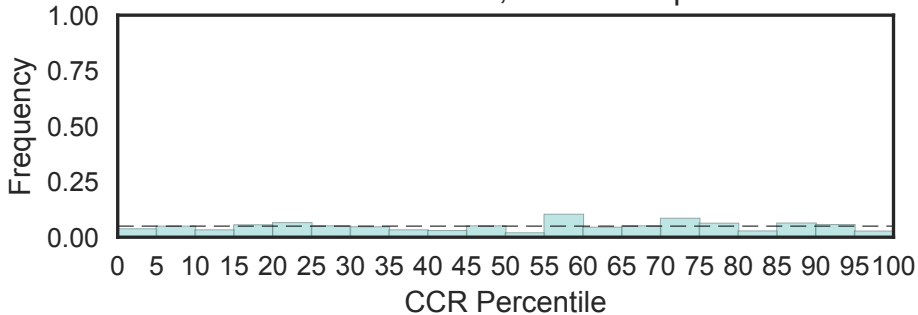

IRSp53/MIM homology domain  
(IMD, N=6)

Fisher's OR: 1.24; Bonferroni p-val: 1

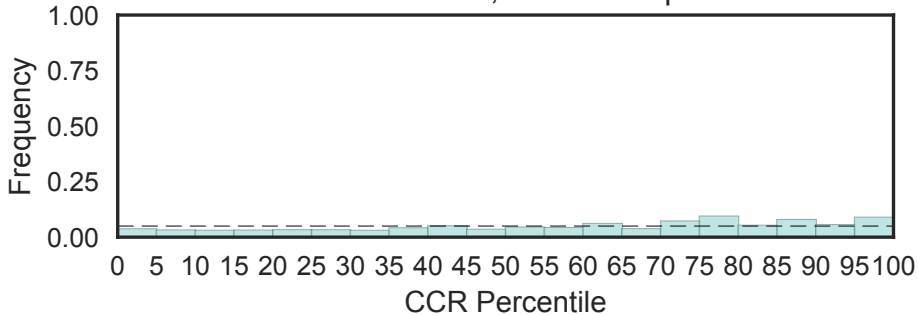

Vacuolar membrane-associated protein Iml1  
(IML1, N=1)

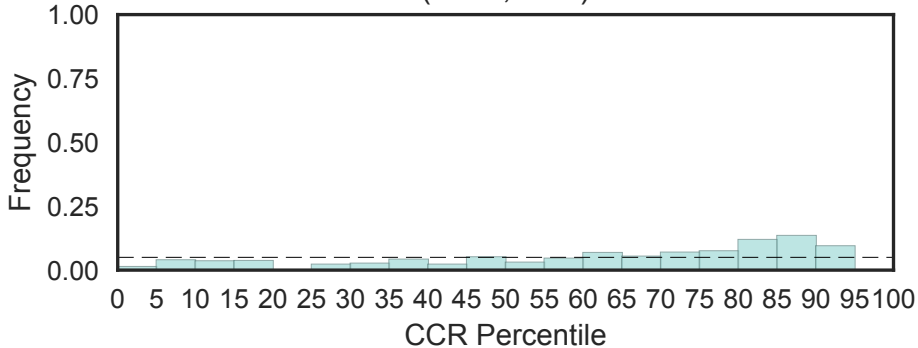



IMP dehydrogenase / GMP reductase domain  
(IMPDH, N=6)

Fisher's OR: 1.02; Bonferroni p-val: 1

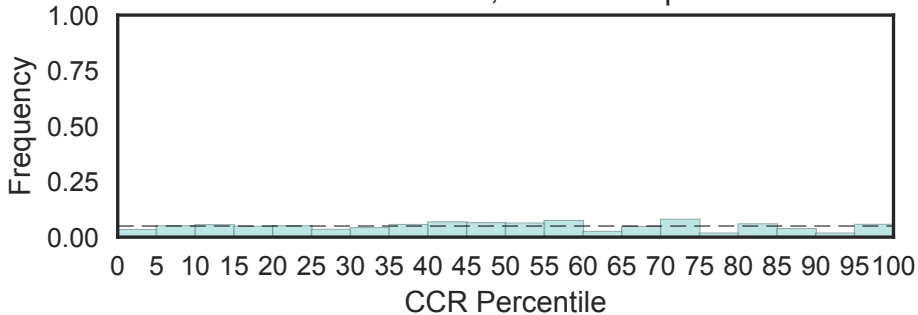

impB/mucB/samB family  
(IMS, N=4)

Fisher's OR: 0; Bonferroni p-val: 1

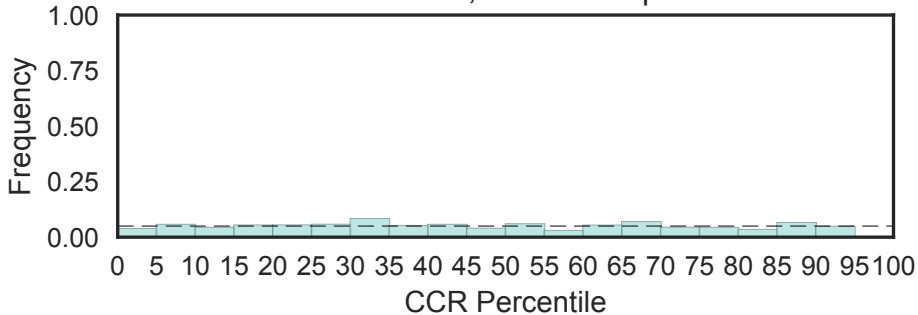

impB/mucB/samB family C-terminal domain  
(IMS\_C, N=4)

Fisher's OR: 0; Bonferroni p-val: 1

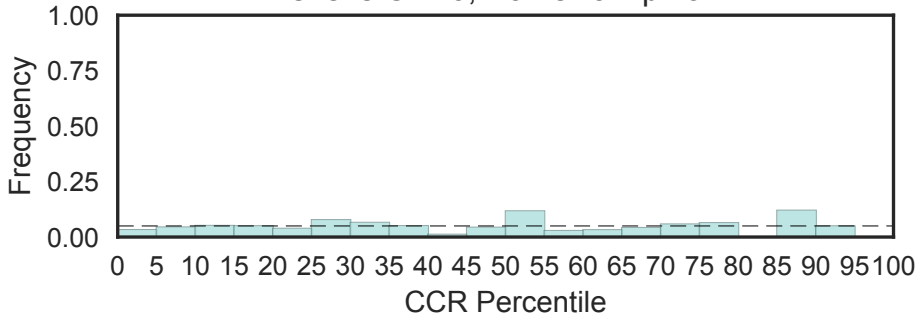

IMS family HHH motif  
(IMS\_HHH, N=1)

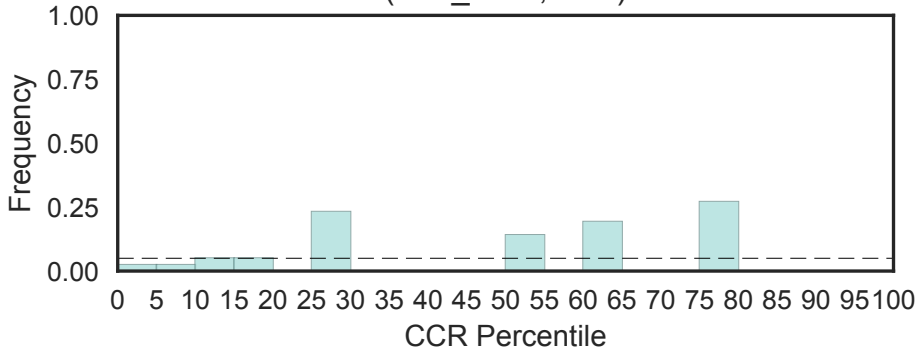

Immortalisation up-regulated protein  
(IMUP, N=2)

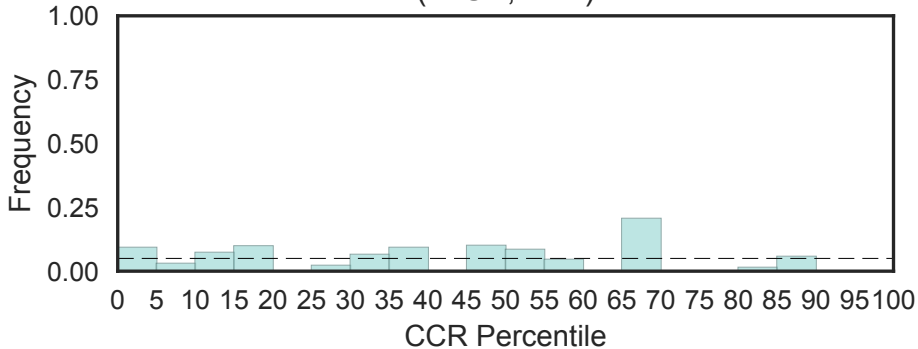

# INCA1

(INCA1, N=1)

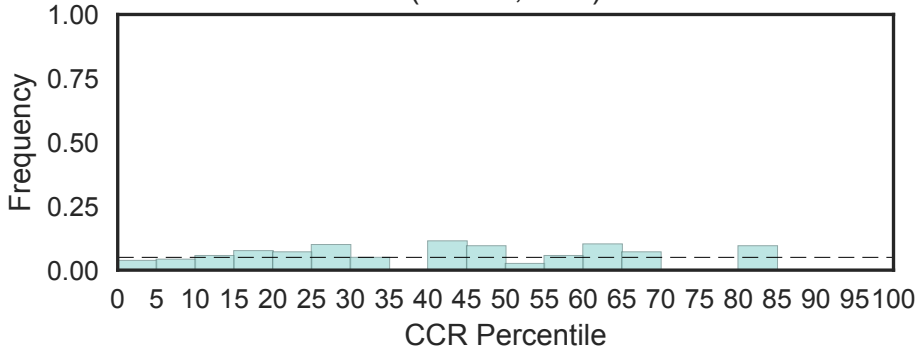

Inner centromere protein, ARK binding region  
(INCENP\_ARK-bind, N=1)

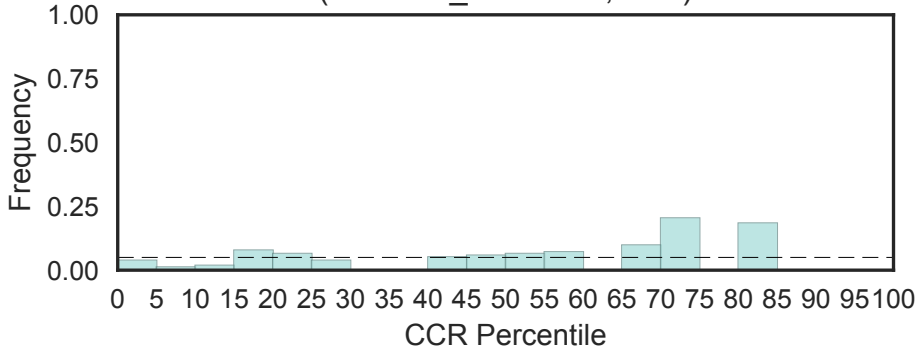

# Chromosome passenger complex (CPC) protein INCENP N terminal (INCENP\_N, N=1)

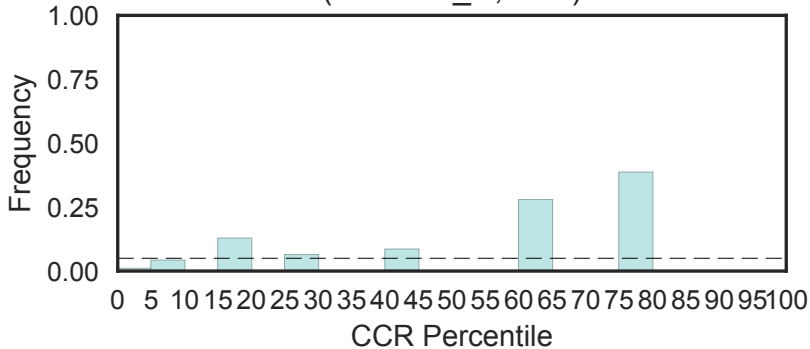



Inhibitor of growth proteins N-terminal histone-binding  
(ING, N=7)

Fisher's OR: 1.64; Bonferroni p-val: 1

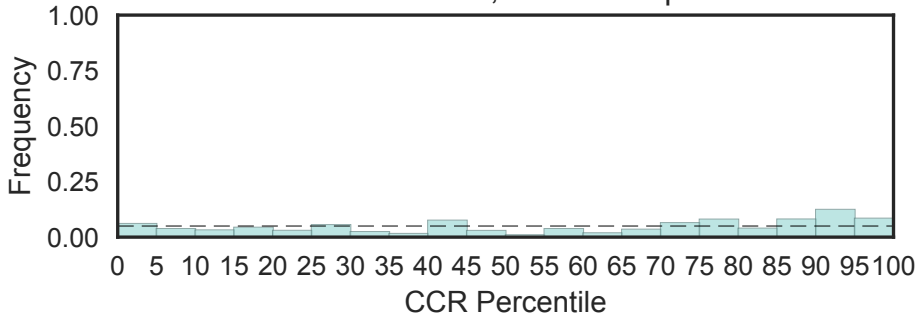

Type II inositol 1,4,5-trisphosphate 5-phosphatase PH domain  
(INPP5B\_PH, N=1)

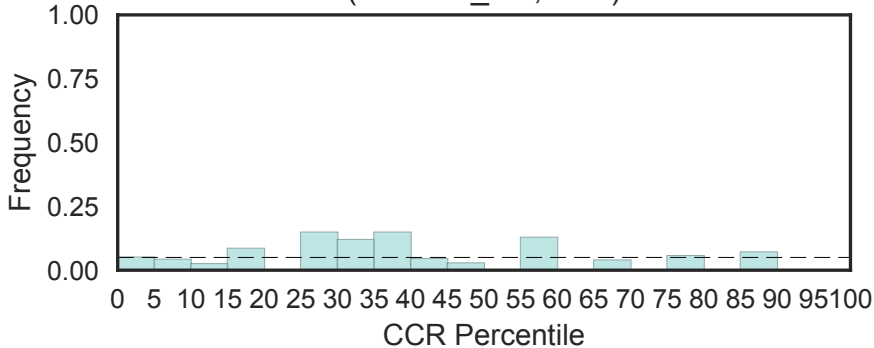

Inscuteable LGN-binding domain  
(INSC\_LBD, N=1)

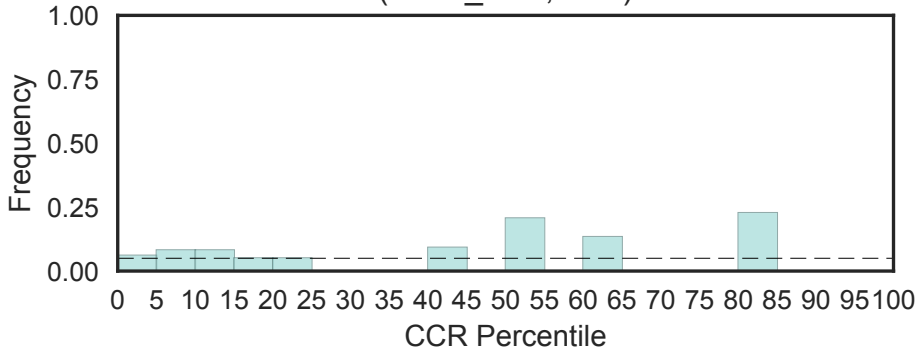

Insulin-induced protein (INSIG)  
(INSIG, N=2)

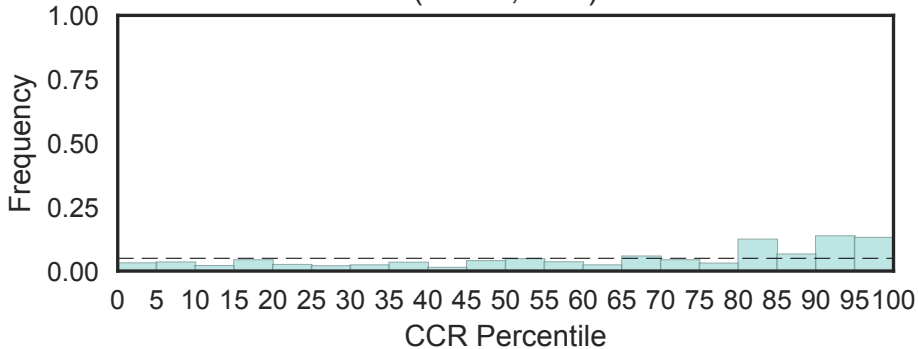

Intersectin and clathrin adaptor AP2 binding region  
(INTAP, N=1)

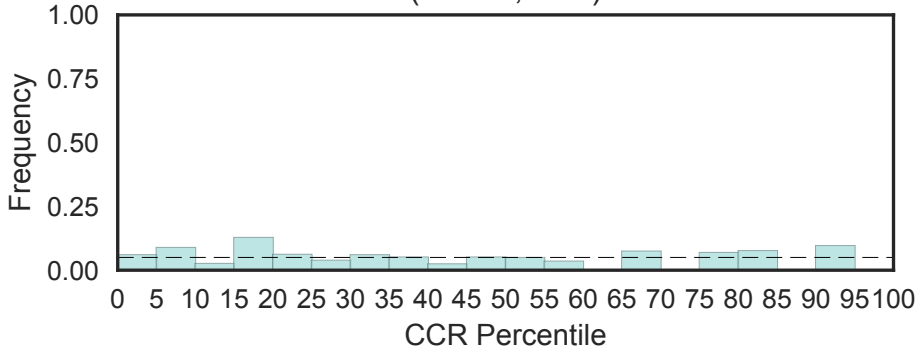

Integrator complex subunit 2  
(INTS2, N=1)

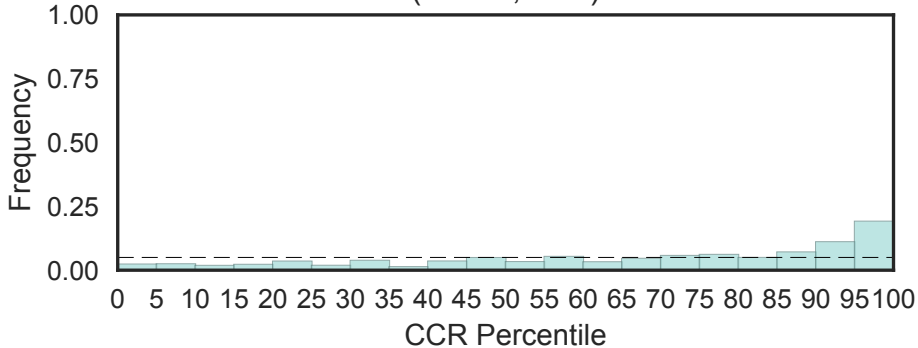

Integrator complex subunit 5 C-terminus  
(INTS5\_C, N=1)

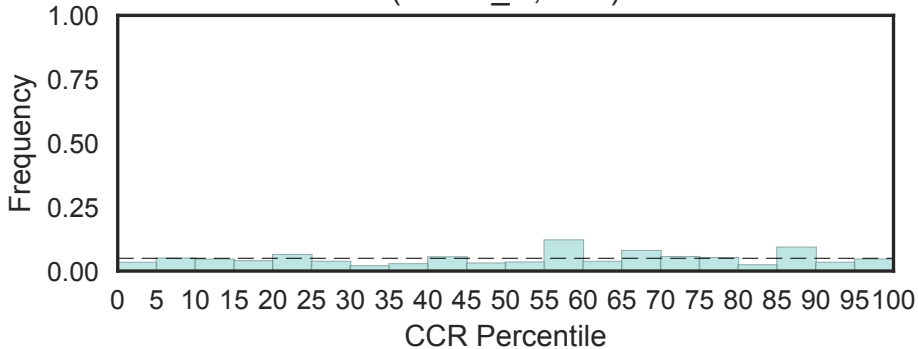

Integrator complex subunit 5 N-terminus  
(INTS5\_N, N=2)

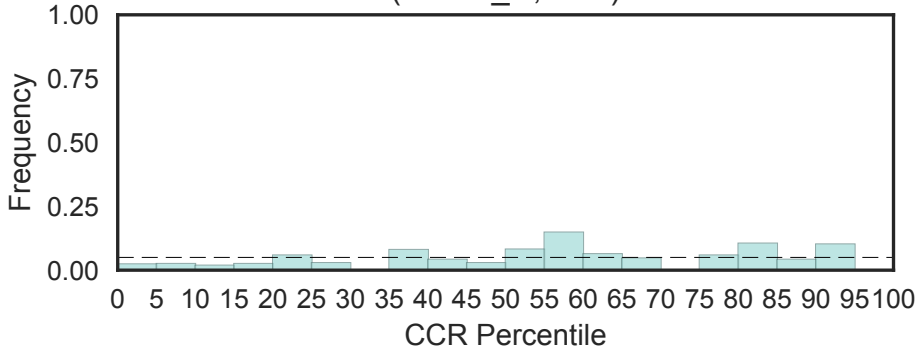



INTS6/SAGE1/DDX26B/CT45 C-terminus  
(INT\_SG\_DDX\_CT\_C, N=1)

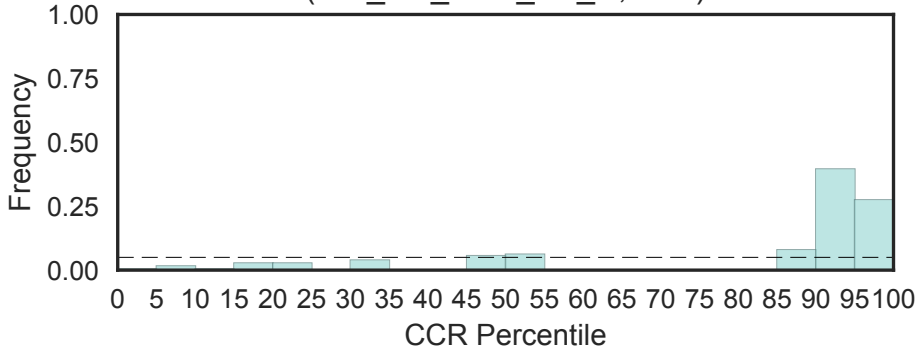

Inositol polyphosphate kinase  
(IPK, N=7)

Fisher's OR: 1.31; Bonferroni p-val: 1

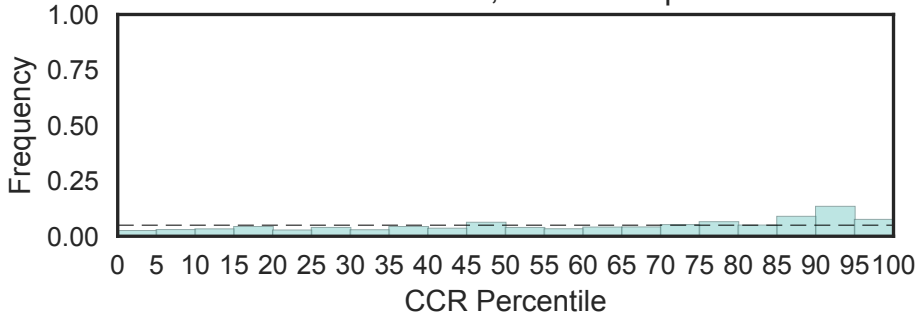

Protein phosphatase inhibitor 2 (IPP-2)  
(IPP-2, N=1)

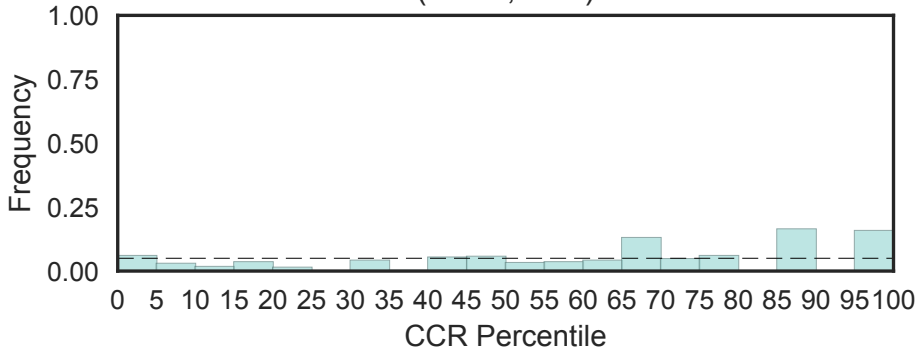

# IPP transferase (IPPT, N=1)

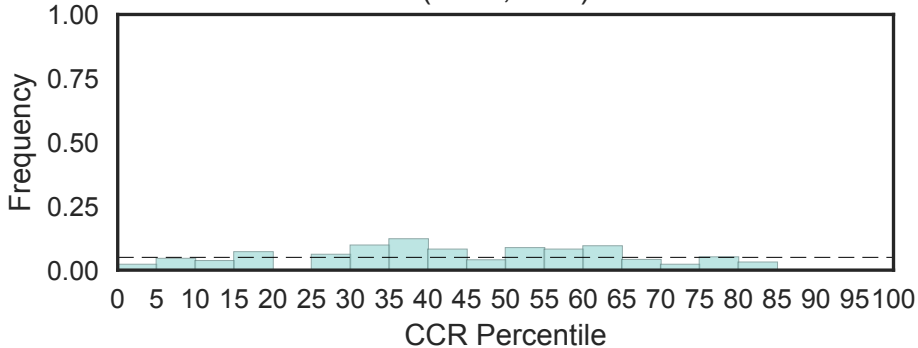

# Isopentenyl transferase (IPT, N=1)

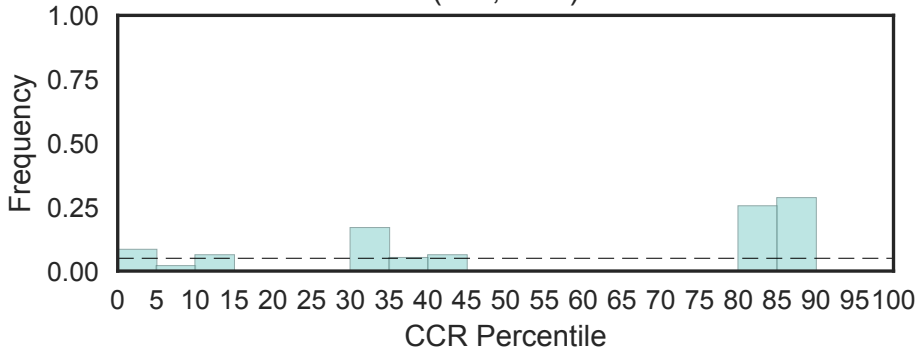

Phosphatidylinositol transfer protein  
(IP\_trans, N=5)

Fisher's OR: 2.49; Bonferroni p-val: 1

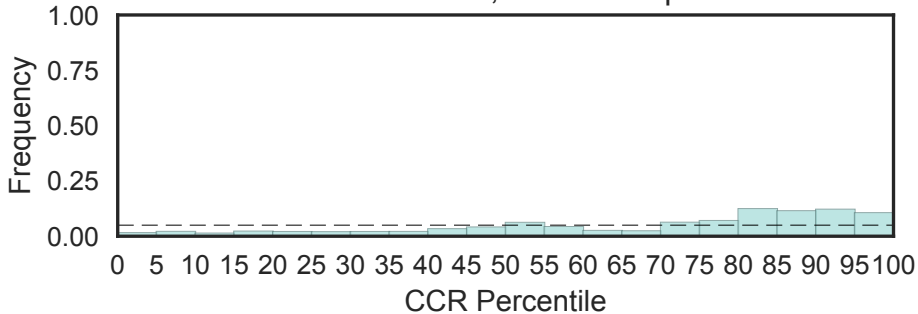

IQ calmodulin-binding motif  
(IQ, N=182)

Fisher's OR: 0.23; Bonferroni p-val: 1

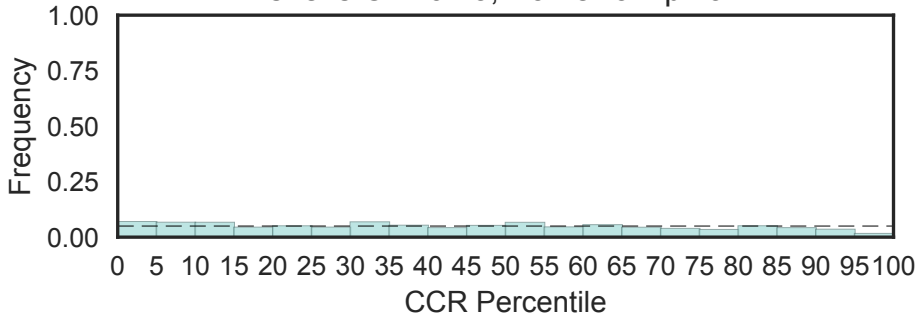

Fusion protein IQCJ-SCHIP1 with IQ-like motif  
(IQCJ-SCHIP1, N=2)

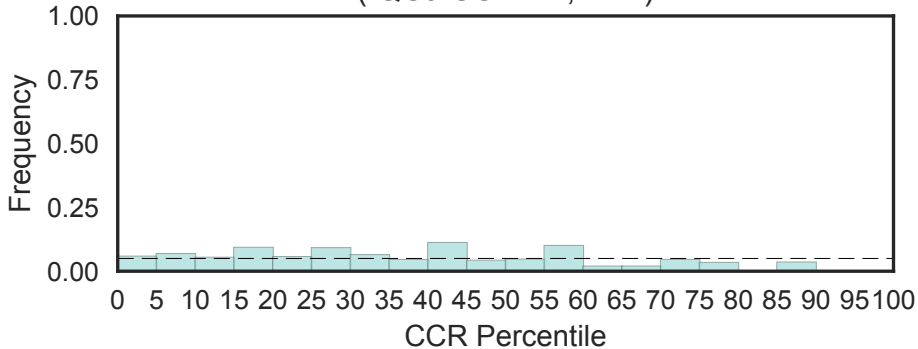



PH domain  
(IQ\_SEC7\_PH, N=4)  
Fisher's OR: 1.03; Bonferroni p-val: 1

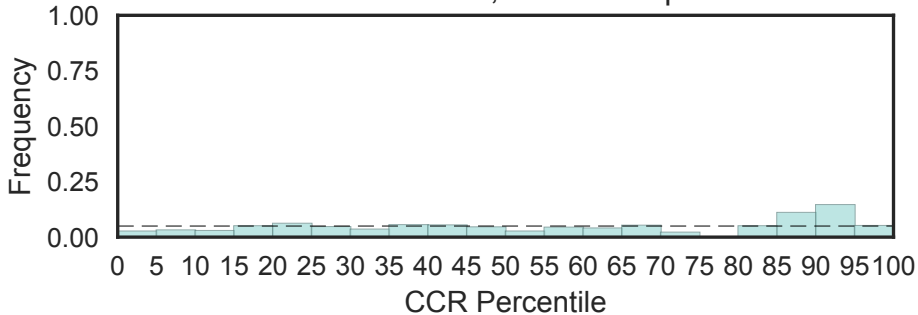

Nup358/RanBP2 E3 ligase domain  
(IR1-M, N=2)

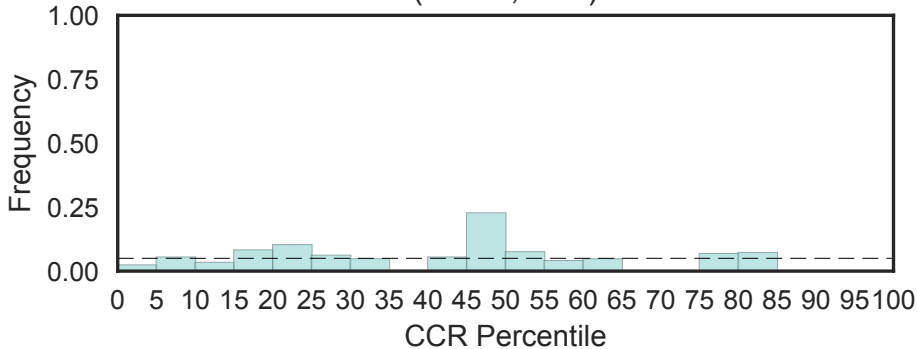

Interferon regulatory factor transcription factor  
(IRF, N=9)

Fisher's OR: 3.49; Bonferroni p-val: 1

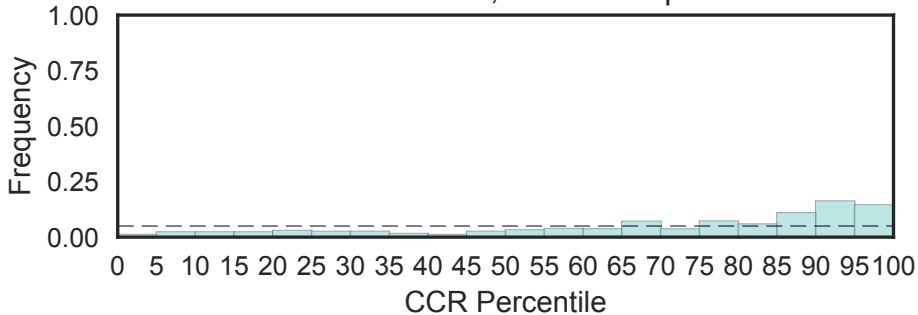

Interferon regulatory factor 2-binding protein zinc finger  
(IRF-2BP1\_2, N=3)

Fisher's OR: 14.4; Bonferroni p-val: 1

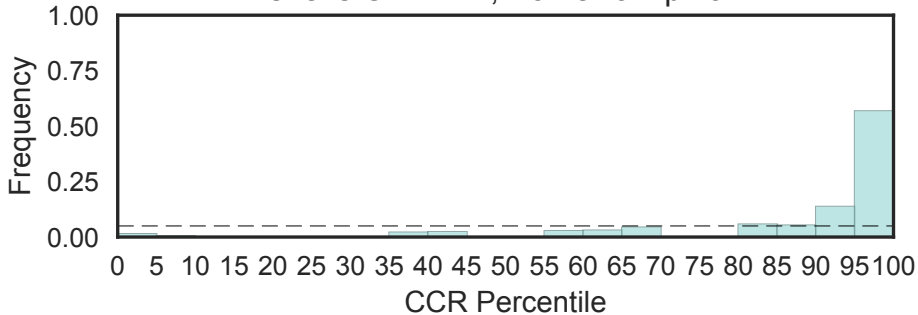

Interferon-regulatory factor 3  
(IRF-3, N=8)

Fisher's OR: 0.978; Bonferroni p-val: 1

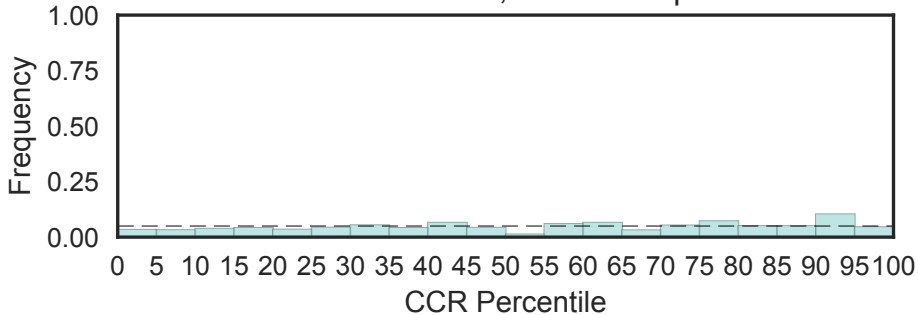

Inward rectifier potassium channel  
(IRK, N=16)

Fisher's OR: 3.61; Bonferroni p-val: 4.52e-08

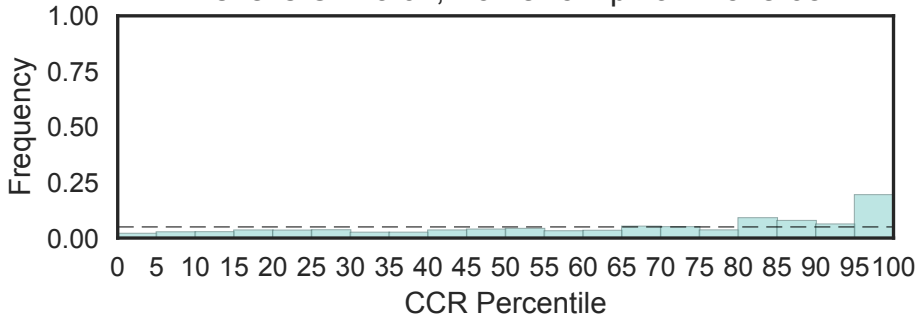

# Inward rectifier potassium channel N-terminal (IRK\_N, N=2)

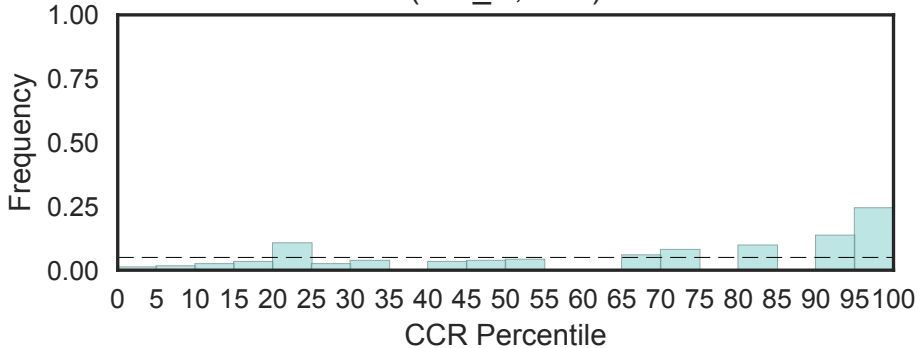

PTB domain (IRS-1 type)  
(IRS, N=11)

Fisher's OR: 0.793; Bonferroni p-val: 1

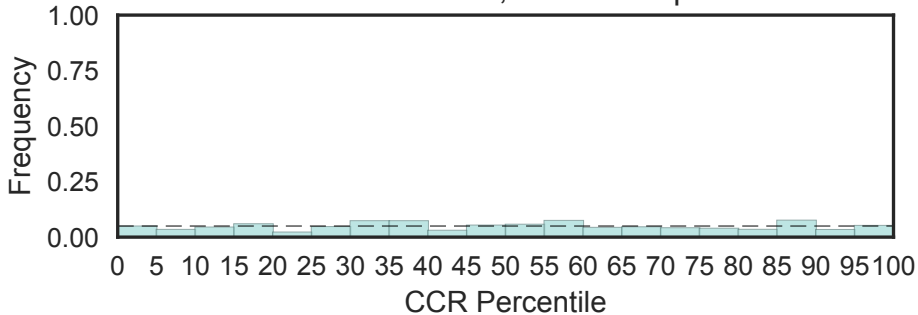



# Unstructured linking region I-set and fnIII on Brother of CDO (ISET-FN3\_linker, N=1)

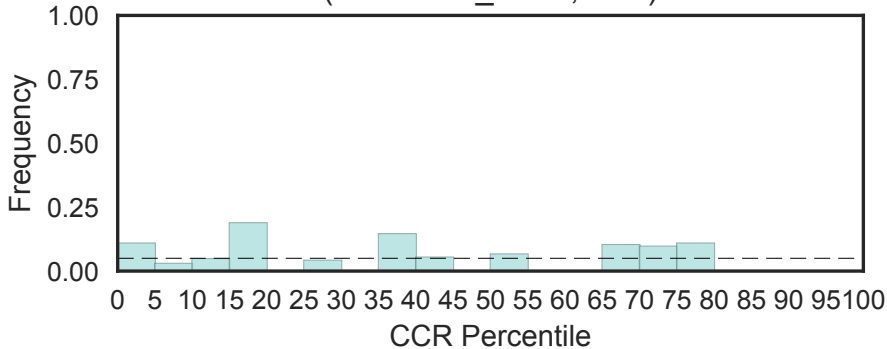

Slow voltage-gated potassium channel  
(ISK\_Channel, N=4)

Fisher's OR: 0; Bonferroni p-val: 1

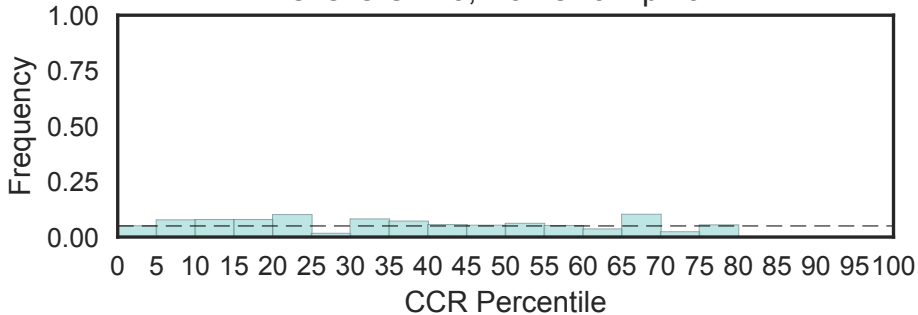

Immunoreceptor tyrosine-based activation motif  
(ITAM, N=8)

Fisher's OR: 1.52; Bonferroni p-val: 1

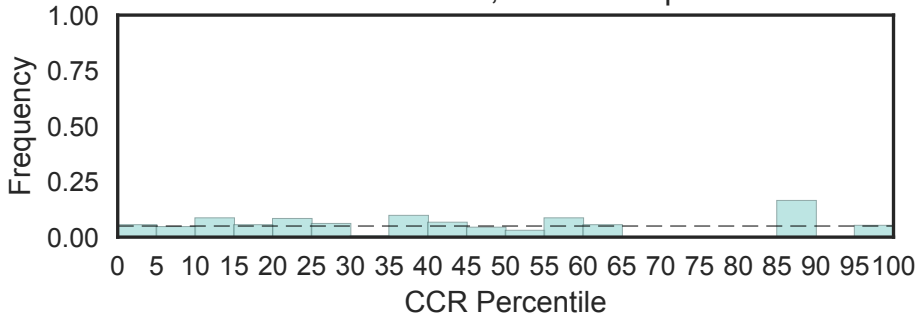

Inter-alpha-trypsin inhibitor heavy chain C-terminus  
(ITI\_HC\_C, N=5)

Fisher's OR: 0; Bonferroni p-val: 1

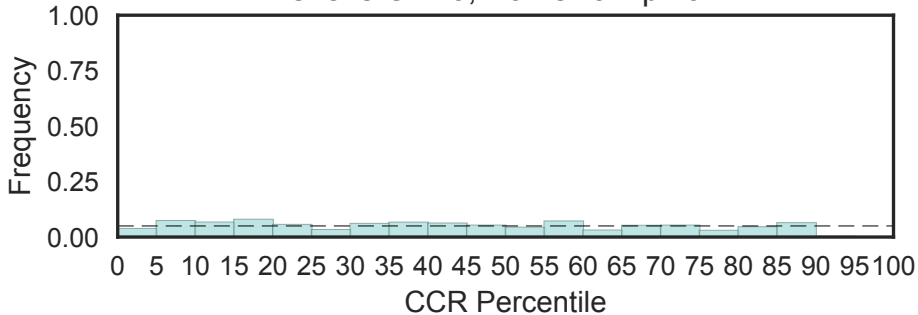

Izumo sperm-egg fusion, Ig domain-associated  
(IZUMO, N=4)

Fisher's OR: 0.421; Bonferroni p-val: 1

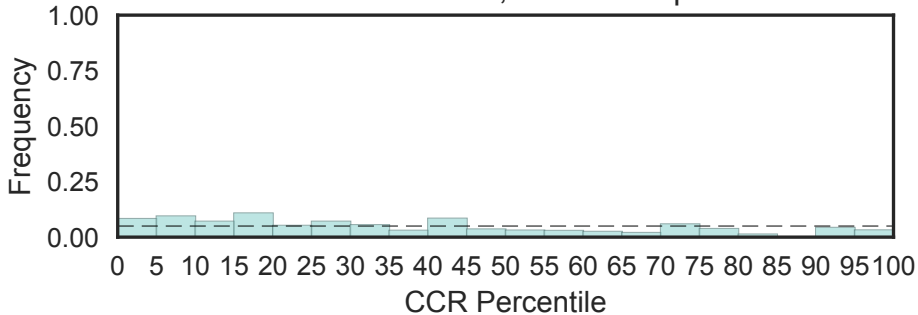

I/LWEQ domain  
(I\_LWEQ, N=5)

Fisher's OR: 0.822; Bonferroni p-val: 1

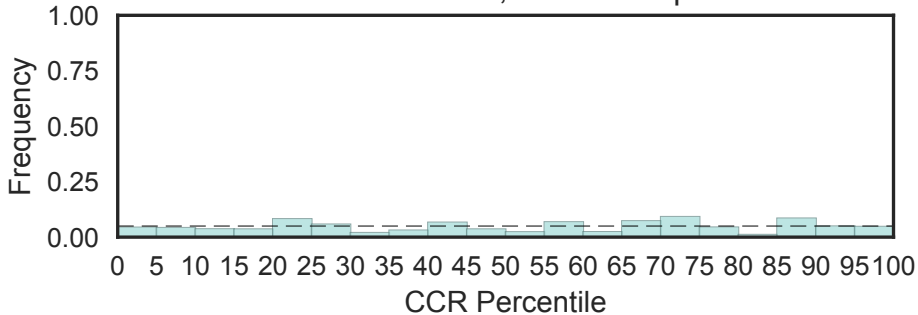

Interferon-induced 6-16 family  
(Ifi-6-16, N=4)

Fisher's OR: 0.825; Bonferroni p-val: 1

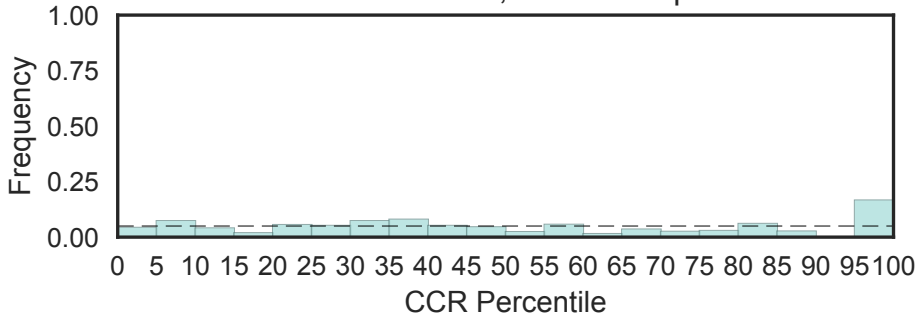

IgGFc binding protein  
(IgGFc\_binding, N=1)

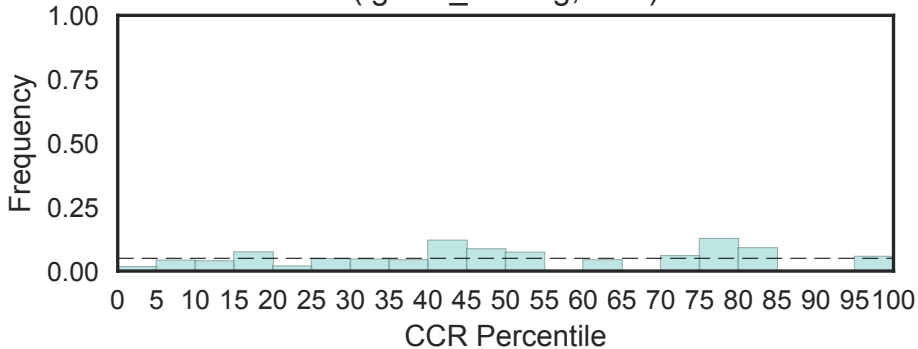



Immunoglobulin domain  
(Ig\_2, N=502)

Fisher's OR: 0.409; Bonferroni p-val: 7.02e-10

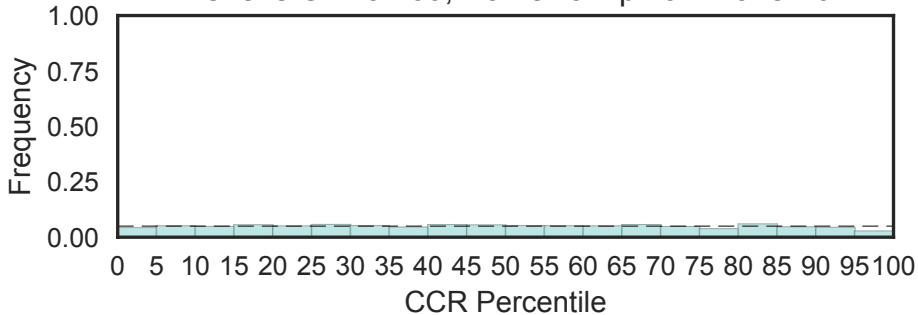

Immunoglobulin domain  
(Ig\_3, N=673)

Fisher's OR: 0.392; Bonferroni p-val: 1.29e-15

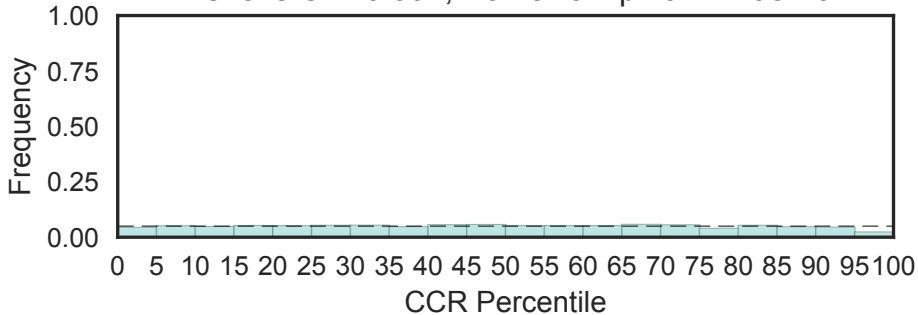

T-cell surface glycoprotein CD3 delta chain  
(lg\_4, N=3)

Fisher's OR: 1.3; Bonferroni p-val: 1

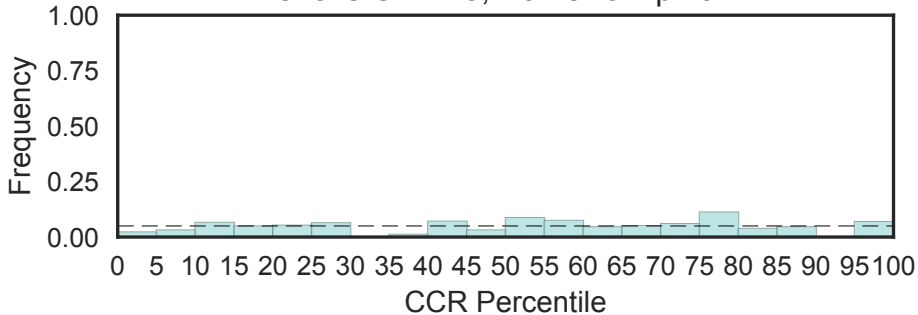

Ig-like domain on T-cell surface glycoprotein CD3 epsilon chain  
(Ig\_5, N=2)

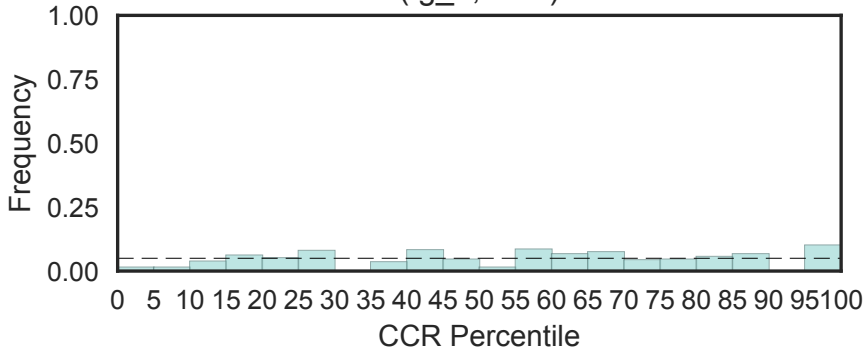

Immunoglobulin J chain  
(Ig\_J\_chain, N=1)

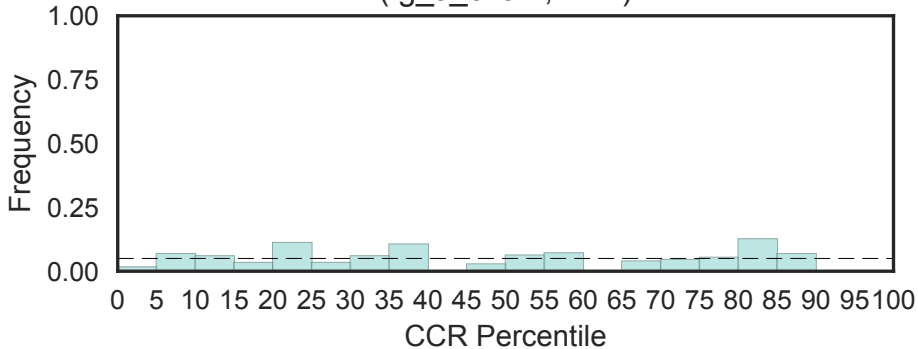

Tie-2 Ig-like domain 1  
(Ig\_Tie2\_1, N=1)

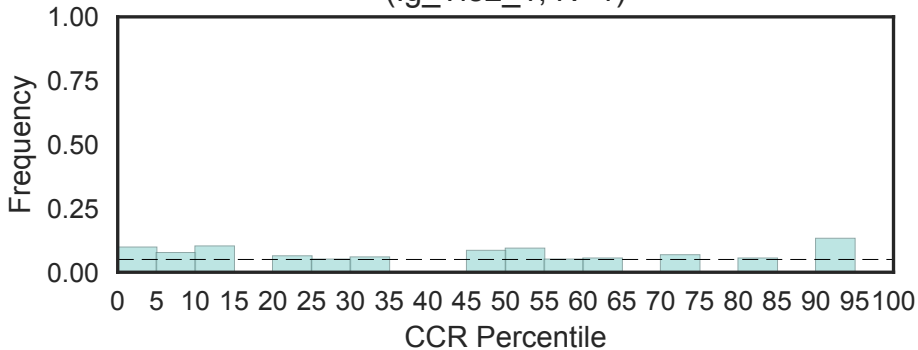

Putative Interleukin 2 receptor, gamma chain  
(Il2rg, N=1)

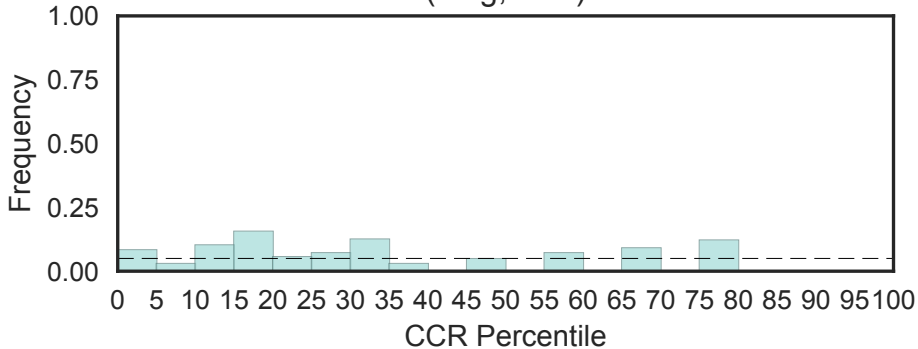

# Acetohydroxy acid isomeroreductase, NADPH-binding domain (IlvN, N=2)

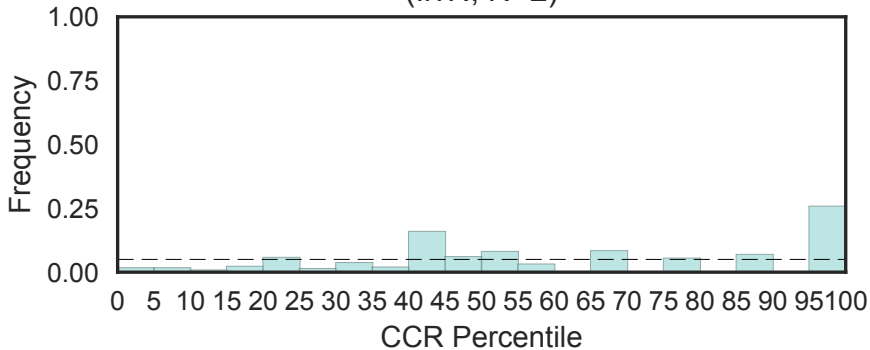



Ima1 N-terminal domain  
(Ima1\_N, N=1)

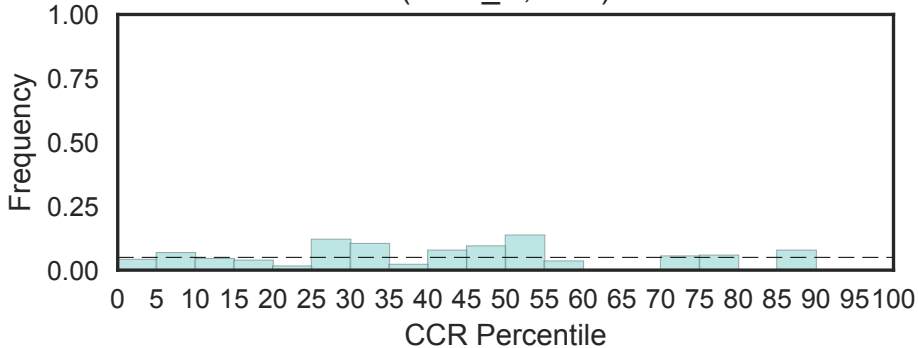

Mitochondrial large subunit ribosomal protein (Img2)  
(Img2, N=1)

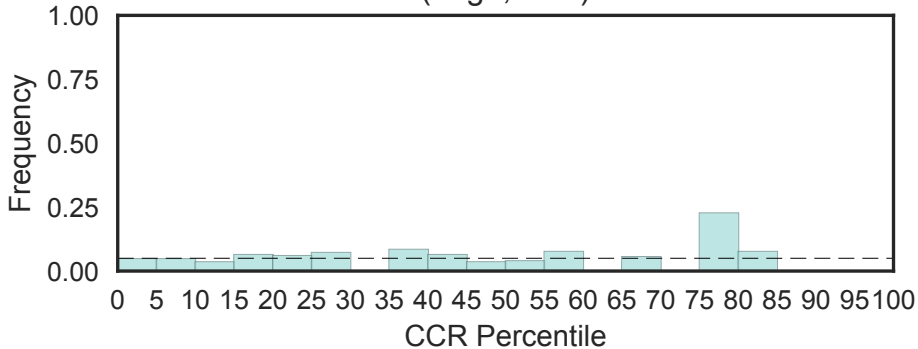

Cathepsin propeptide inhibitor domain (I29)  
(Inhibitor\_I29, N=7)

Fisher's OR: 0.693; Bonferroni p-val: 1

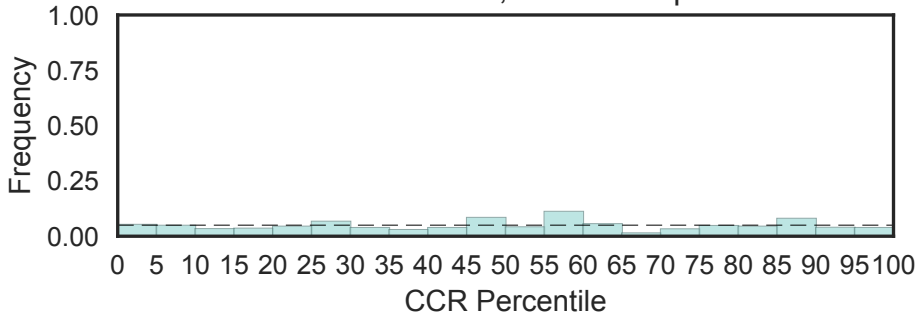

Peptidase inhibitor I9  
(Inhibitor\_I9, N=1)

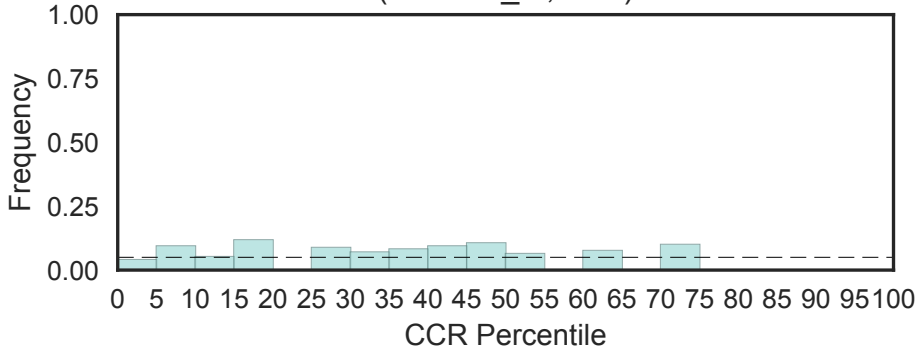

EGFR receptor inhibitor Mig-6  
(Inhibitor\_Mig-6, N=2)

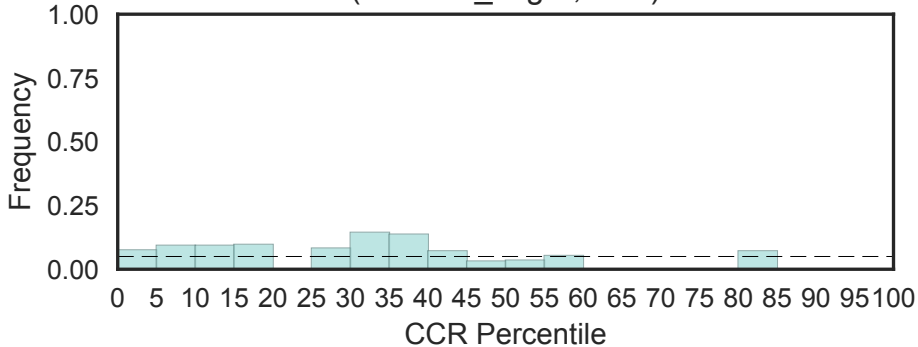

Innexin  
(Innexin, N=3)

Fisher's OR: 1.63; Bonferroni p-val: 1

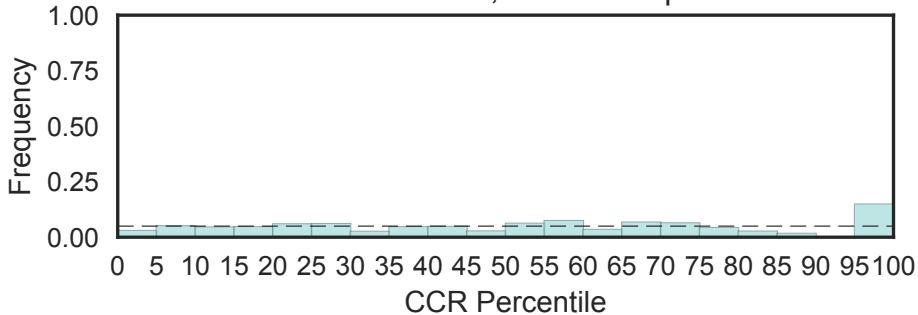

Myo-inositol-1-phosphate synthase  
(Inos-1-P\_synth, N=1)

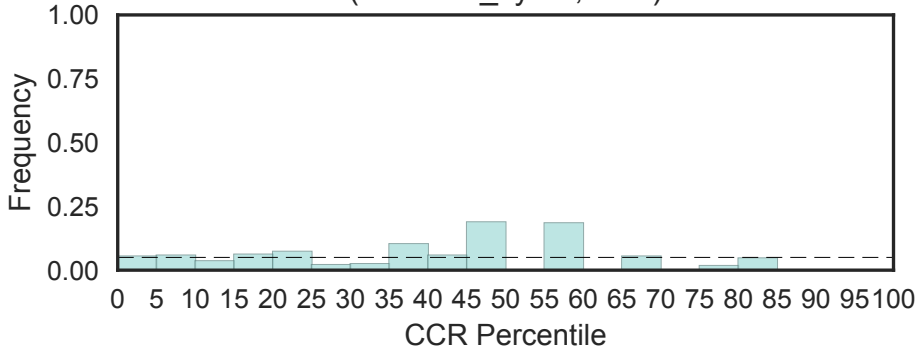

Inositol monophosphatase family  
(Inositol\_P, N=5)

Fisher's OR: 0; Bonferroni p-val: 1

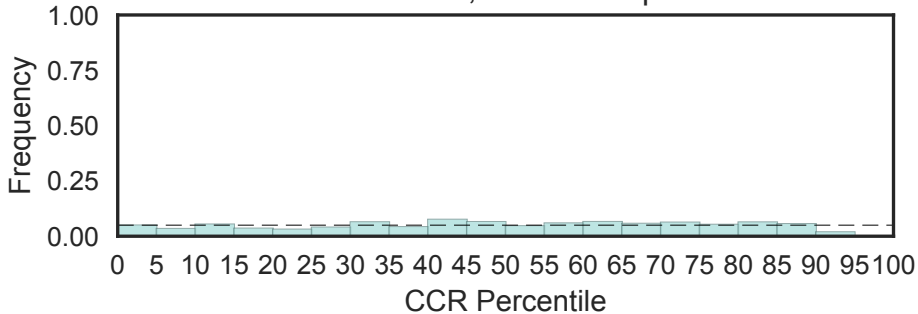



Inositol 1, 3, 4-trisphosphate 5/6-kinase  
(Ins134\_P3\_kin, N=1)

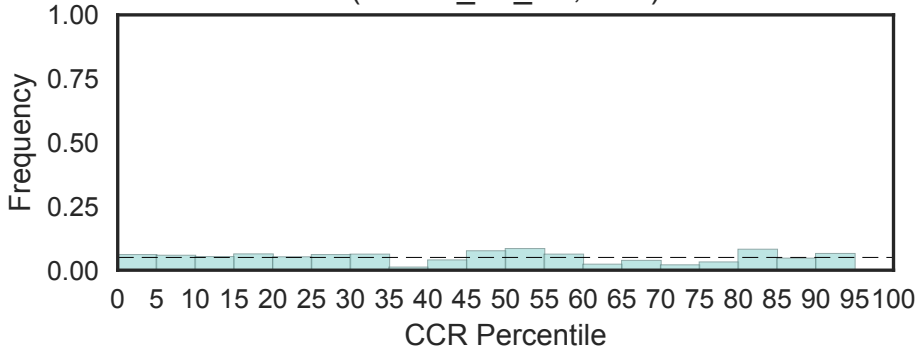

Inositol 1,4,5-trisphosphate/ryanodine receptor  
(Ins145\_P3\_rec, N=6)

Fisher's OR: 3.07; Bonferroni p-val: 1

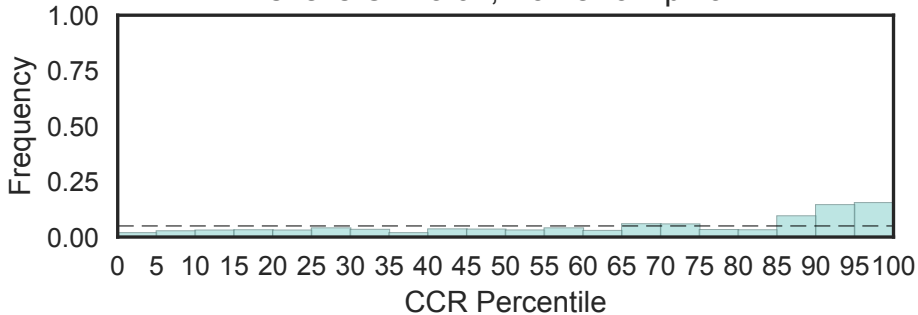

Inositol-pentakisphosphate 2-kinase  
(Ins\_P5\_2-kin, N=1)

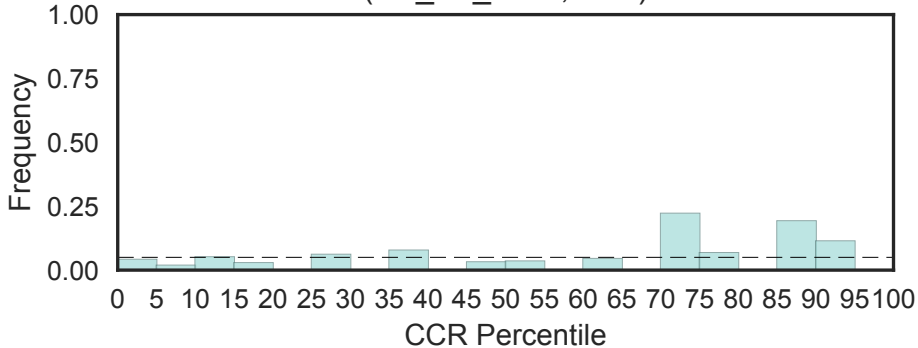

Insulin/IGF/Relaxin family  
(Insulin, N=10)

Fisher's OR: 1.36; Bonferroni p-val: 1

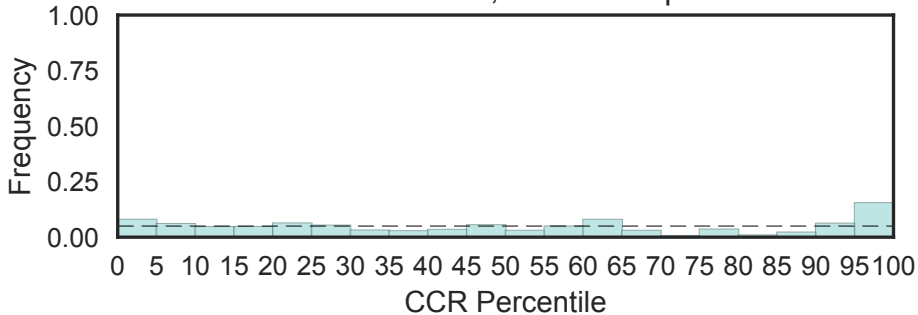

Integrin beta tail domain  
(Integrin\_B\_tail, N=6)

Fisher's OR: 1.05; Bonferroni p-val: 1

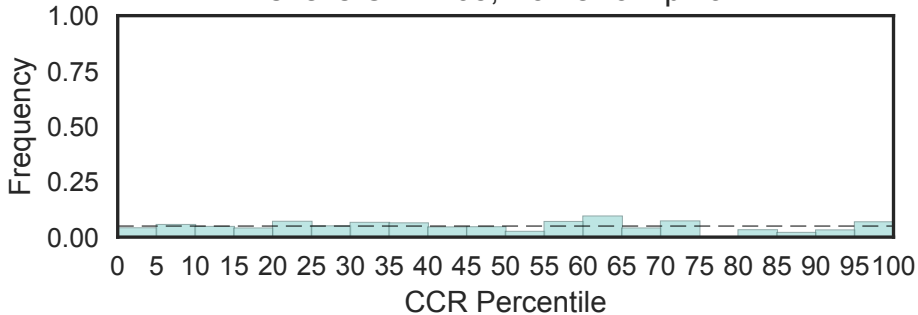

Integrin alpha cytoplasmic region  
(Integrin\_alpha, N=13)

Fisher's OR: 0; Bonferroni p-val: 1

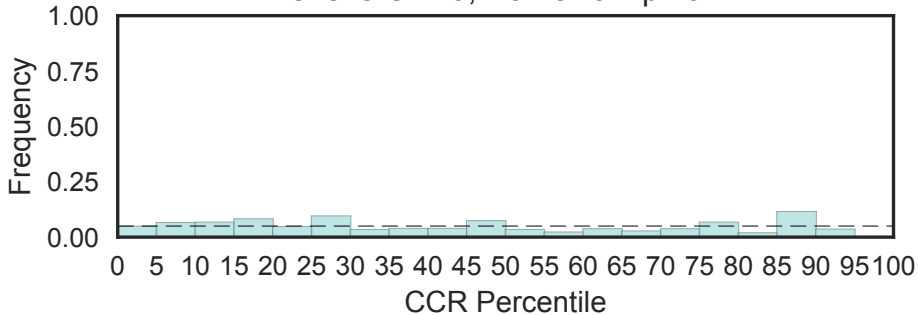

# Integrin alpha

(Integrin\_alpha2, N=18)

Fisher's OR: 0.269; Bonferroni p-val: 0.156

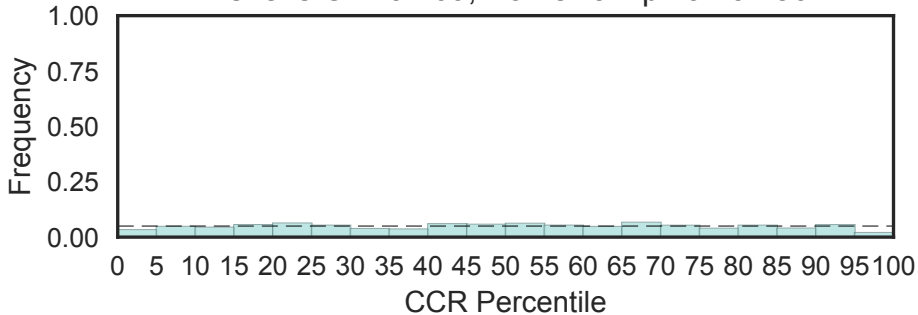

Integrin beta cytoplasmic domain  
(Integrin\_b\_cyt, N=6)

Fisher's OR: 0; Bonferroni p-val: 1

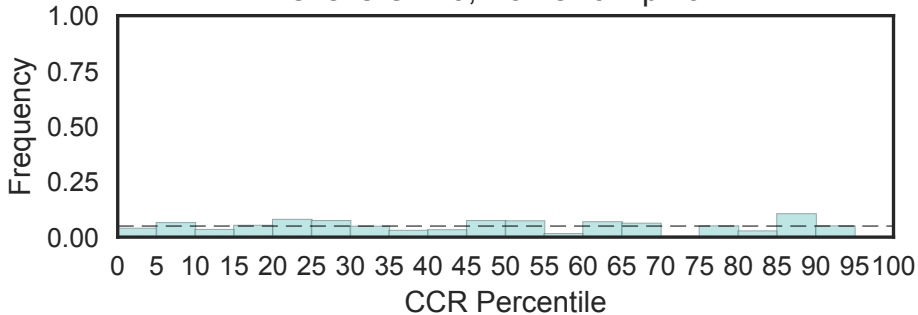



Integrin beta chain VWA domain  
(Integrin\_beta, N=8)  
Fisher's OR: 0.955; Bonferroni p-val: 1

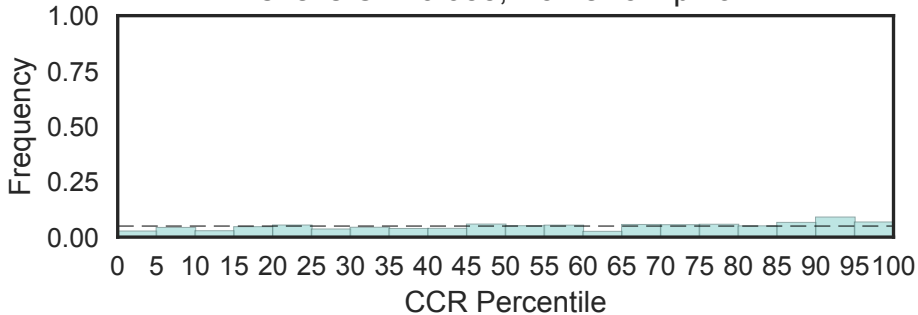

Interferon-alpha/beta receptor, fibronectin type III  
(Interfer-bind, N=15)

Fisher's OR: 0; Bonferroni p-val: 1

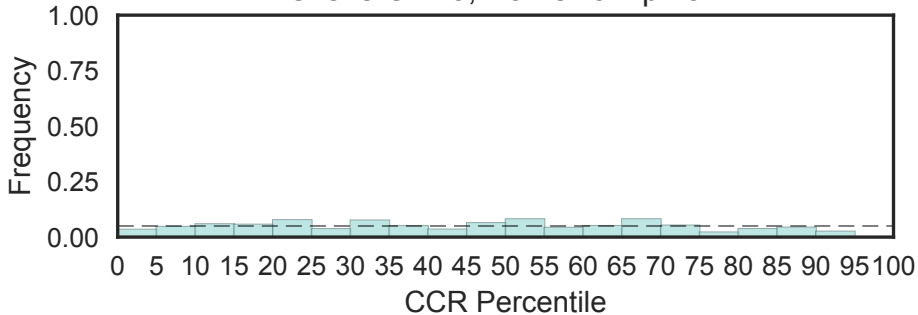

Interferon alpha/beta domain  
(Interferon, N=17)  
Fisher's OR: 0; Bonferroni p-val: 1

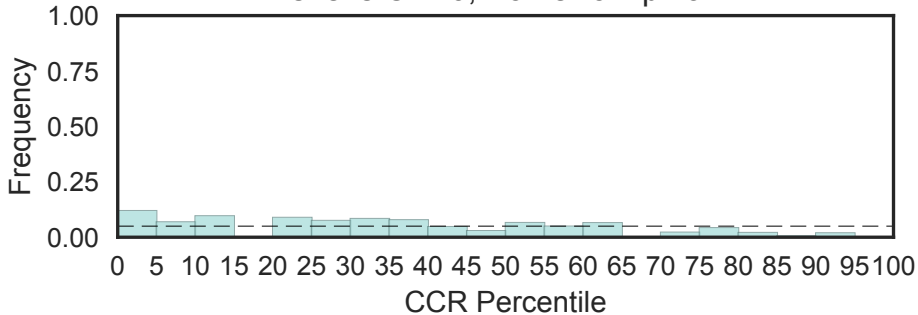

Integrator complex subunit 3  
(Ints3, N=1)

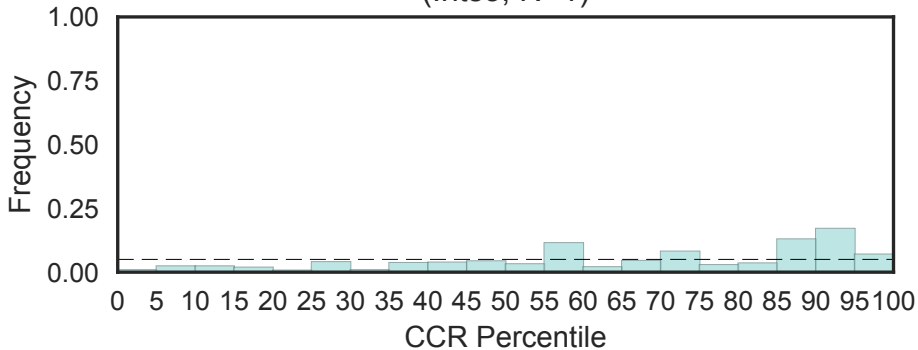

Involucrin repeat  
(Involucrin, N=25)

Fisher's OR: 0; Bonferroni p-val: 1

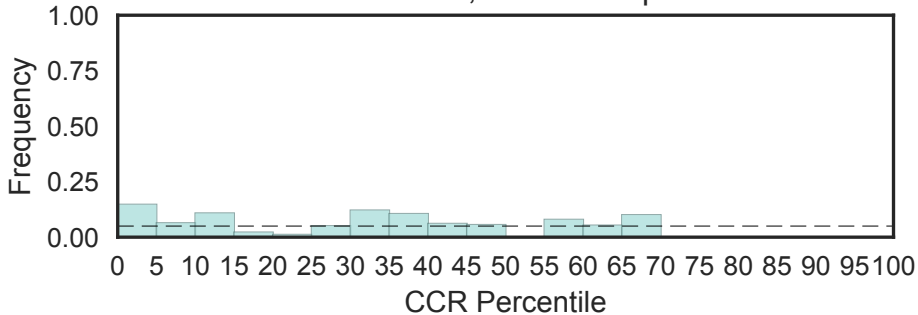

Involucrin of squamous epithelia N-terminus  
(Involucrin\_N, N=1)

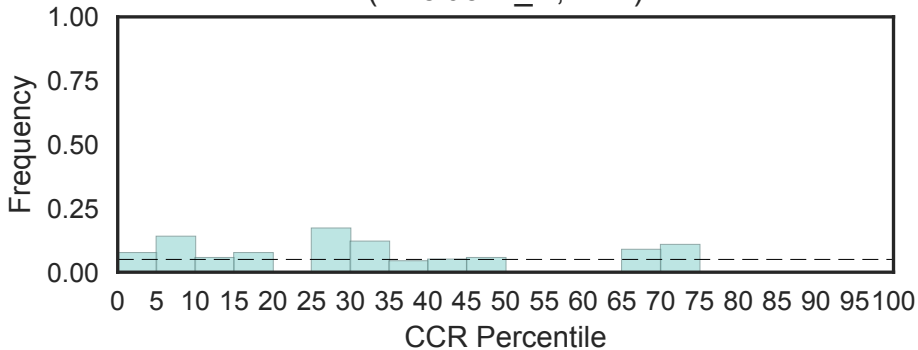

Ion transport protein  
(lon\_trans, N=171)

Fisher's OR: 3.87; Bonferroni p-val: 1.78e-102

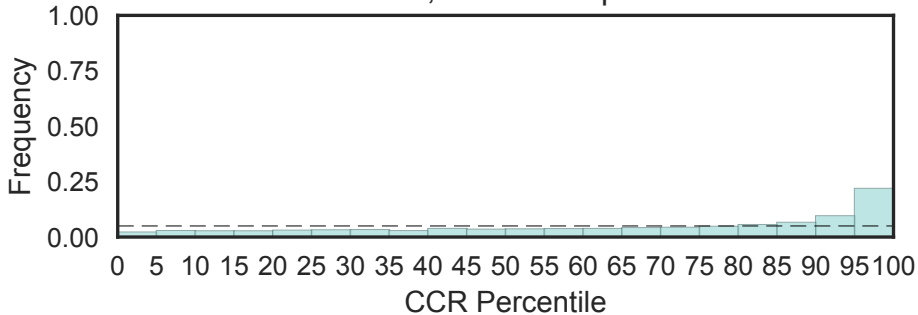

Ion channel

(lon\_trans\_2, N=77)

Fisher's OR: 6.06; Bonferroni p-val: 6.24e-32

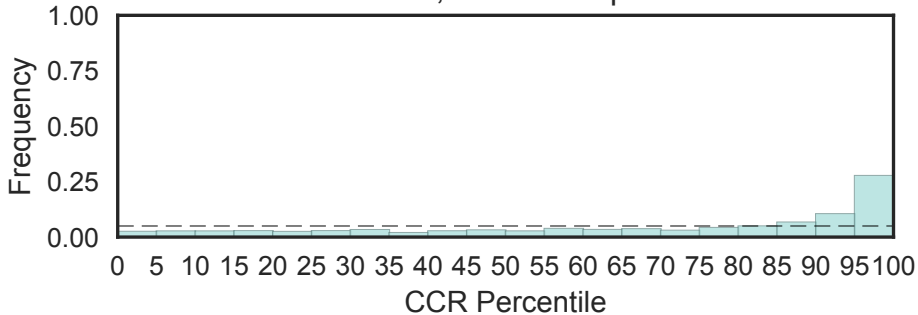



Ion transport protein N-terminal  
(lon\_trans\_N, N=4)  
Fisher's OR: 6.18; Bonferroni p-val: 1

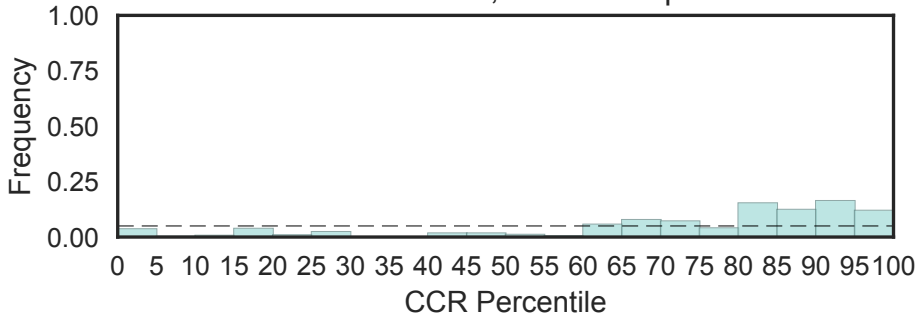

Rix1 complex component involved in 60S ribosome maturation  
(Ipi1\_N, N=1)

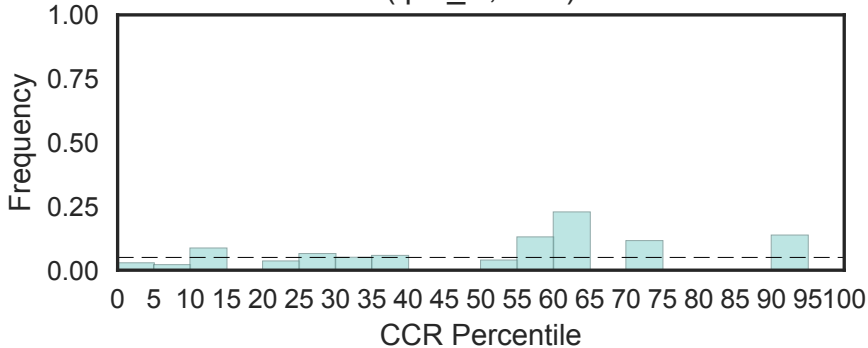

Isocitrate/isopropylmalate dehydrogenase  
(Iso\_dh, N=4)

Fisher's OR: 0.611; Bonferroni p-val: 1

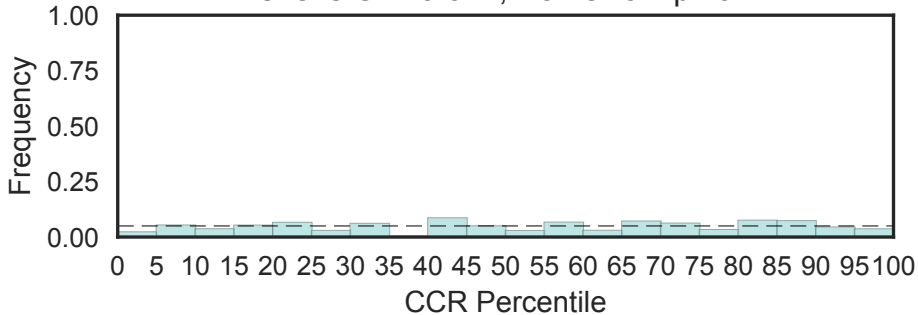

Isochorismatase family  
(Isochorismatase, N=2)

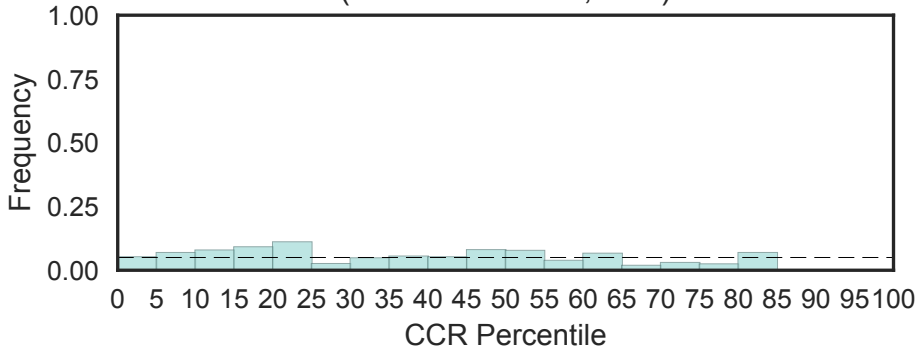

2-C-methyl-D-erythritol 4-phosphate cytidylyltransferase  
(IspD, N=1)

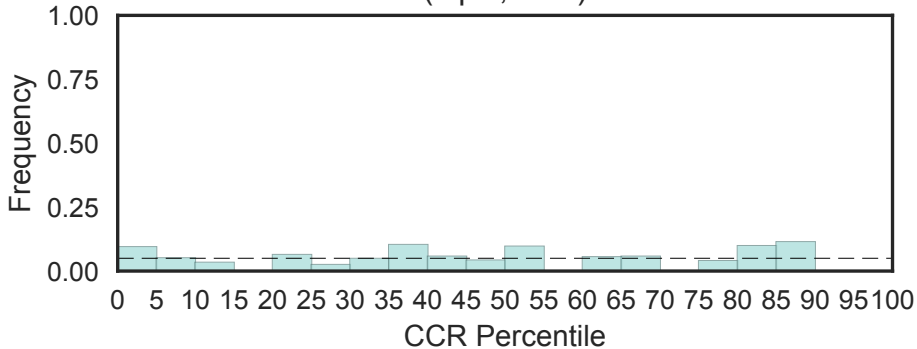

# Regulator of Vps4 activity in the MVB pathway (Ist1, N=1)

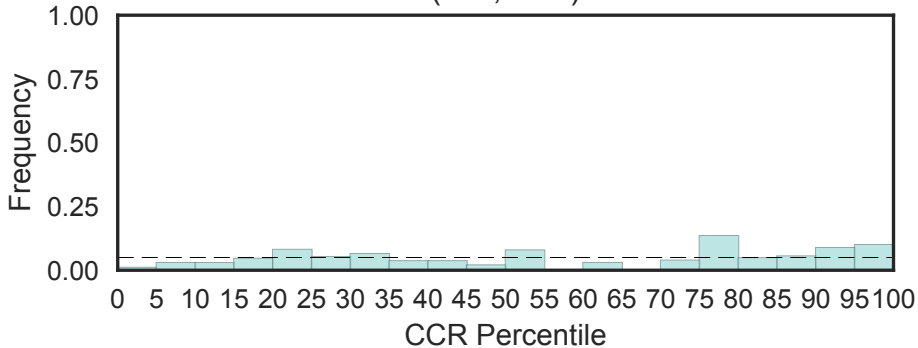

IstB-like ATP binding protein  
(IstB\_IS21, N=1)

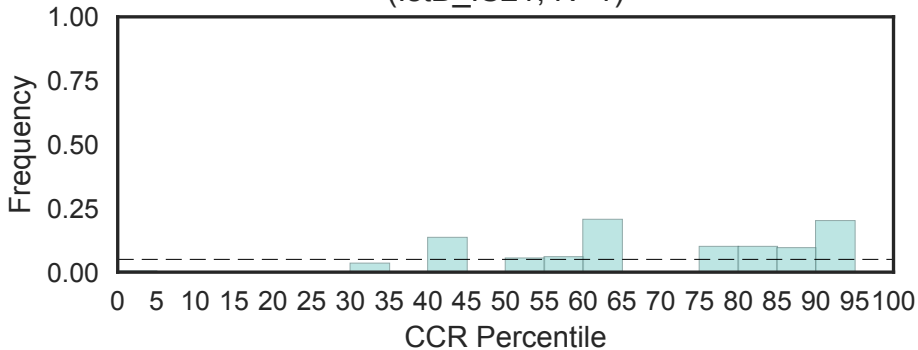

Isy1-like splicing family  
(Isy1, N=2)

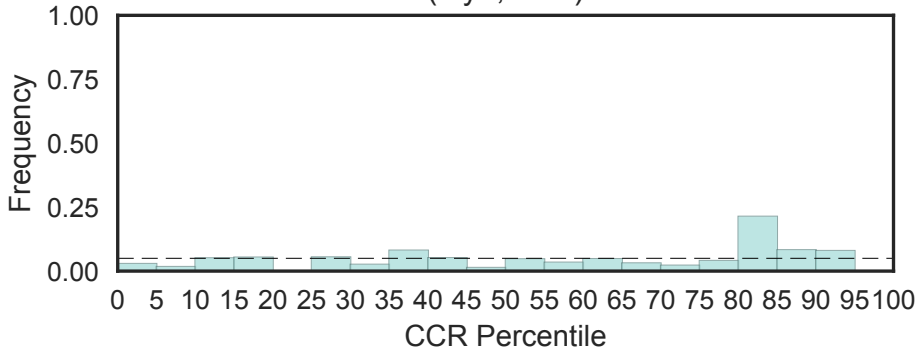



Integrin-alpha FG-GAP repeat-containing protein 2  
(Itfg2, N=2)

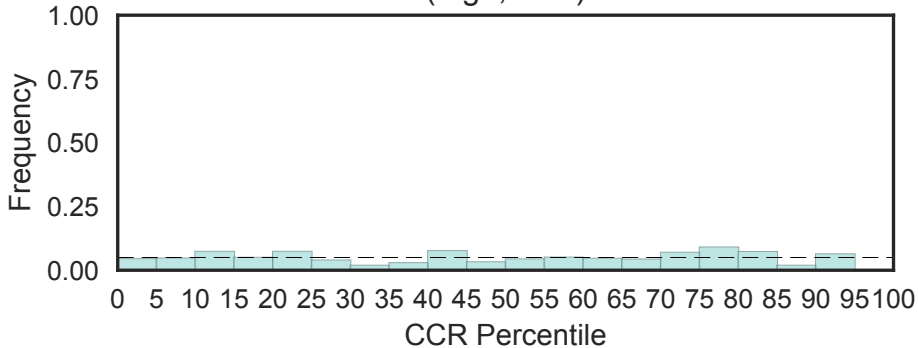

Transcription factor lwr1  
(lwr1, N=1)

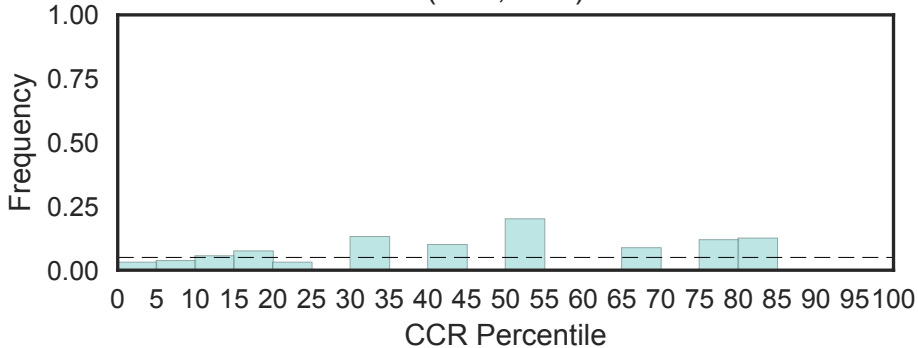

Izumo-like Immunoglobulin domain  
(Izumo-Ig, N=1)

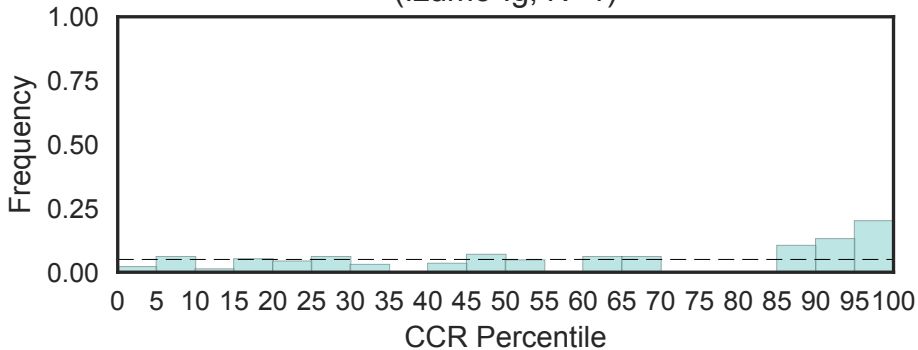

JAB1/Mov34/MPN/PAD-1 ubiquitin protease  
(JAB, N=11)

Fisher's OR: 4.6; Bonferroni p-val: 0.0644

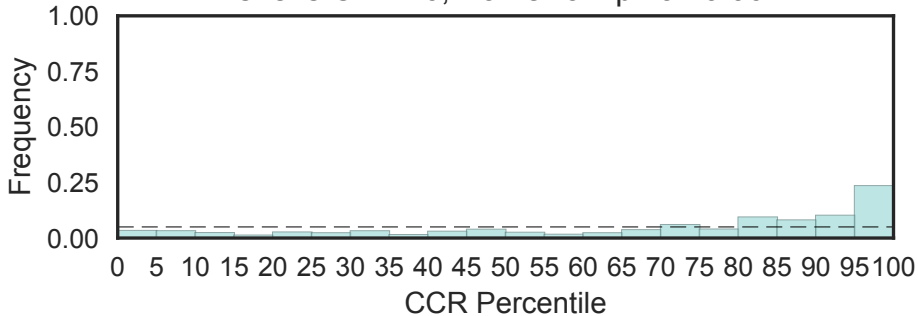

JAKMIP CC3 domain  
(JAKMIP\_CC3, N=3)

Fisher's OR: 3.88; Bonferroni p-val: 1

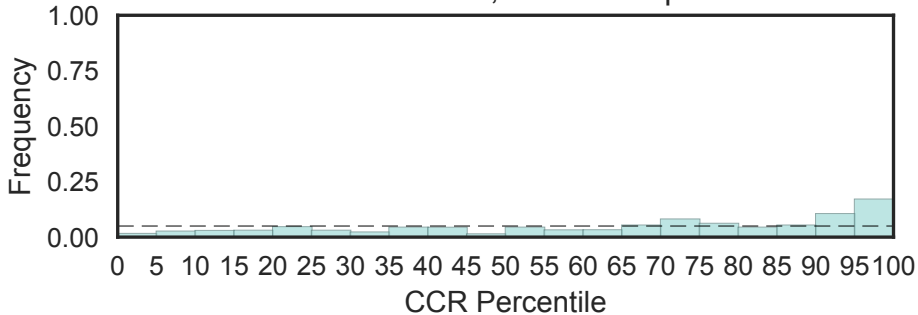

# Junctional protein associated with coronary artery disease (JCAD, N=1)

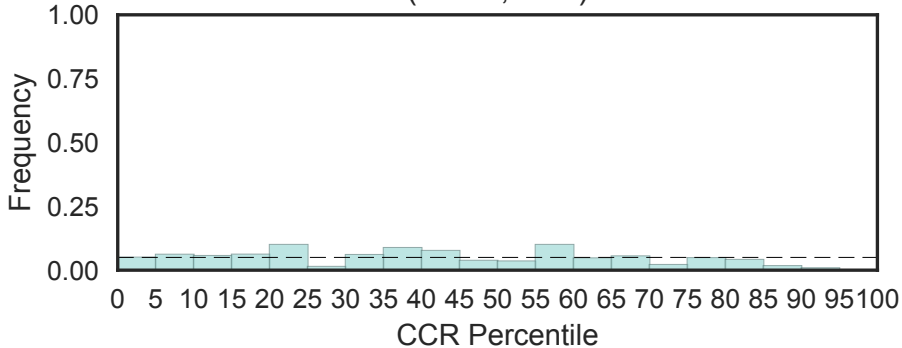

JNK-interacting protein leucine zipper II  
(JIP\_LZII, N=2)

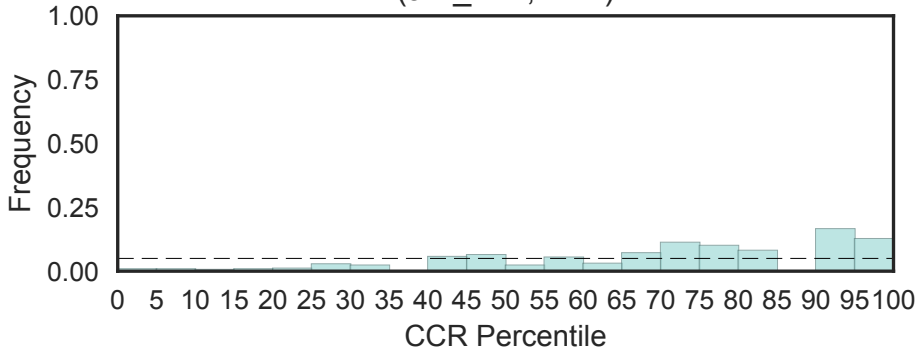

# Junction-mediating and -regulatory protein (JMY, N=2)

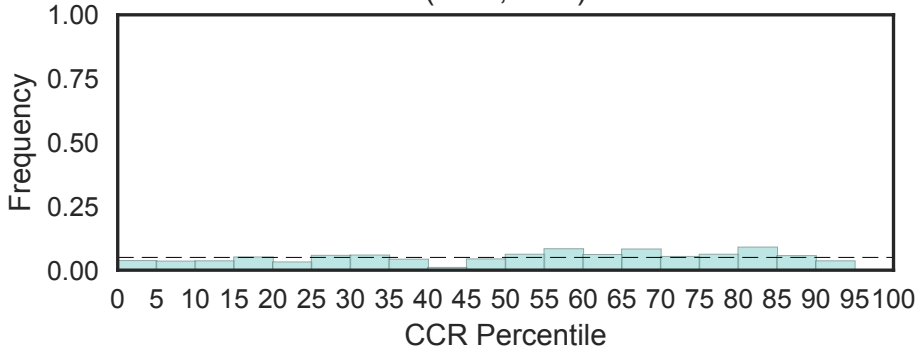



# Junctional sarcoplasmic reticulum protein (JSRP, N=1)

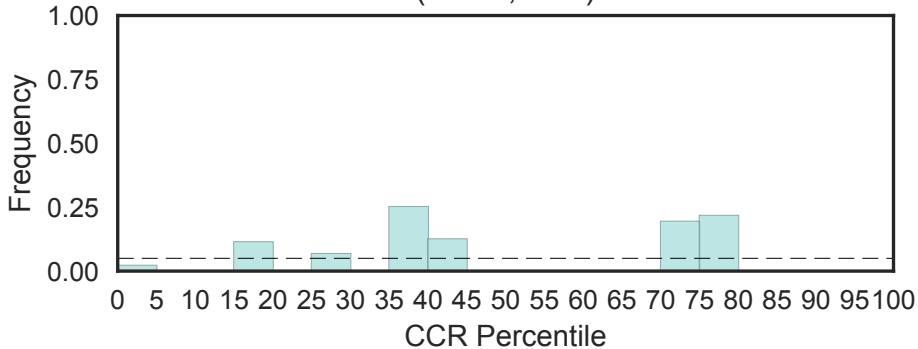

# Jumping translocation breakpoint protein (JTB) (JTB, N=1)

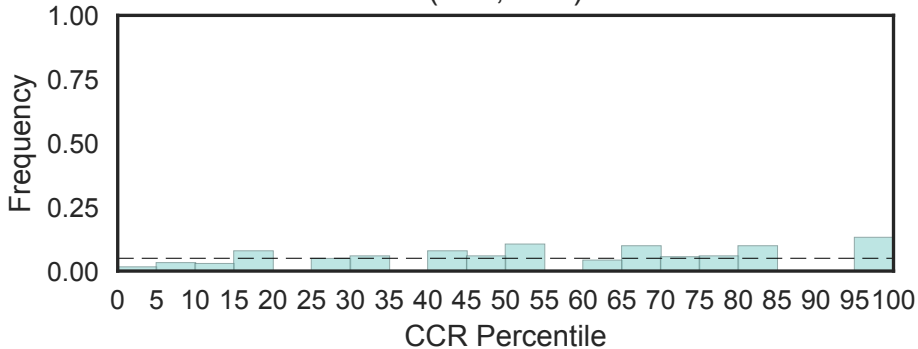

Microtubule-Associated protein Jupiter  
(JUPITER, N=2)

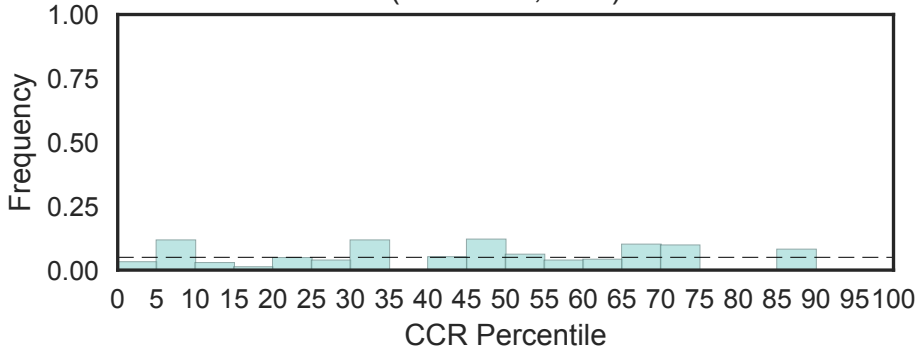

Jacalin-like lectin domain  
(Jacalin, N=2)

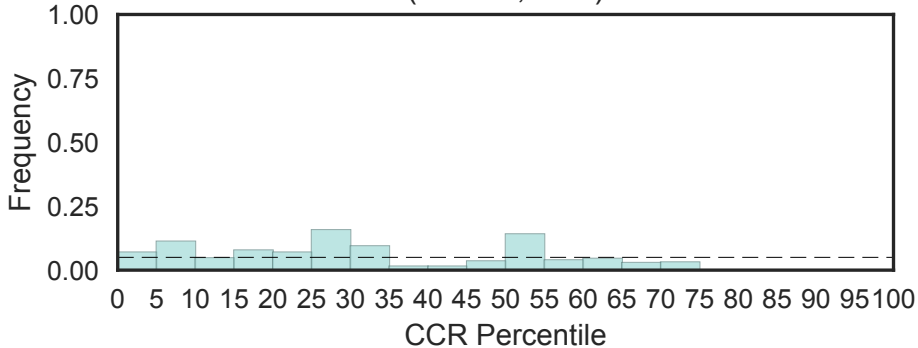

# Jagunal, ER re-organisation during oogenesis (Jagunal, N=1)

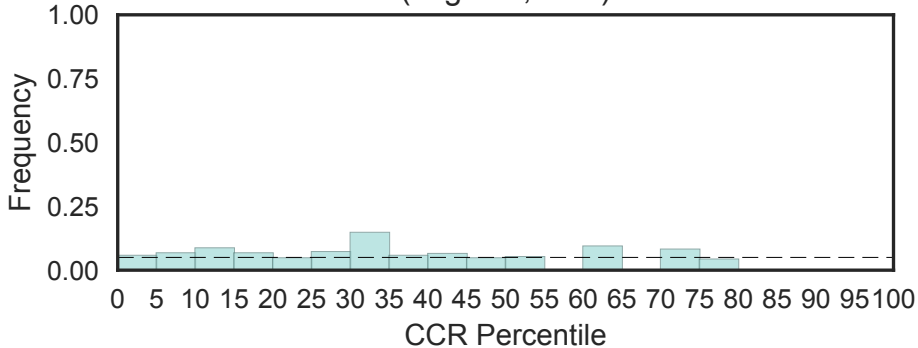

Jiraiya  
(Jiraiya, N=2)

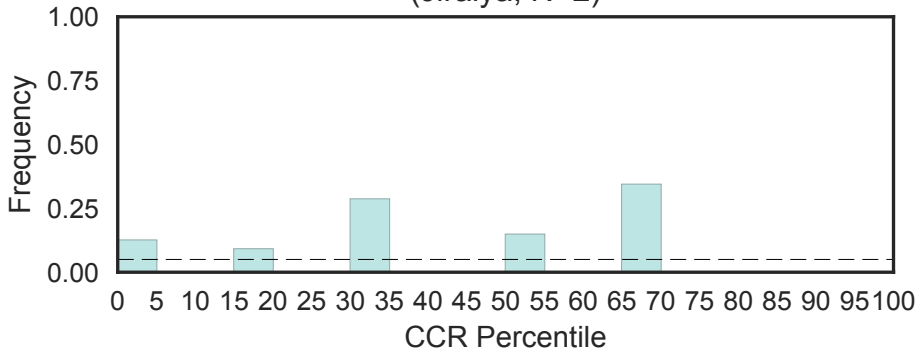

# Cleavage inducing molecular chaperone (Jiv90, N=2)

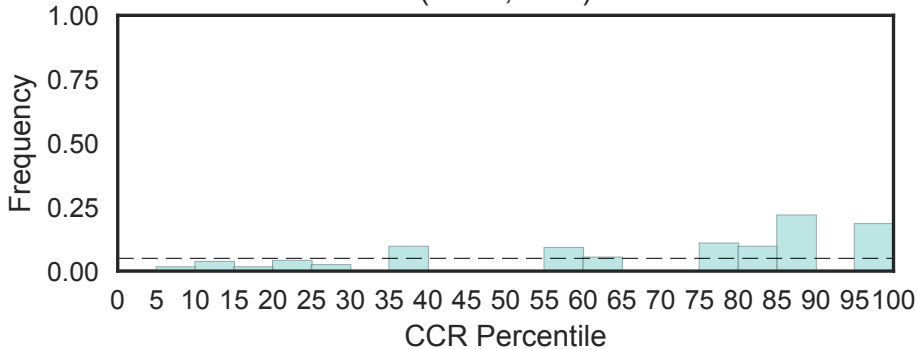

JmjC domain, hydroxylase  
(JmjC, N=19)

Fisher's OR: 5.39; Bonferroni p-val: 1.35e-07

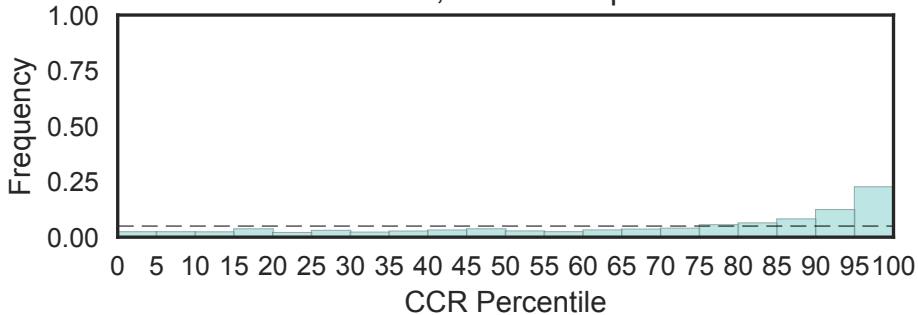



jmjN domain  
(JmjN, N=8)

Fisher's OR: 0; Bonferroni p-val: 1

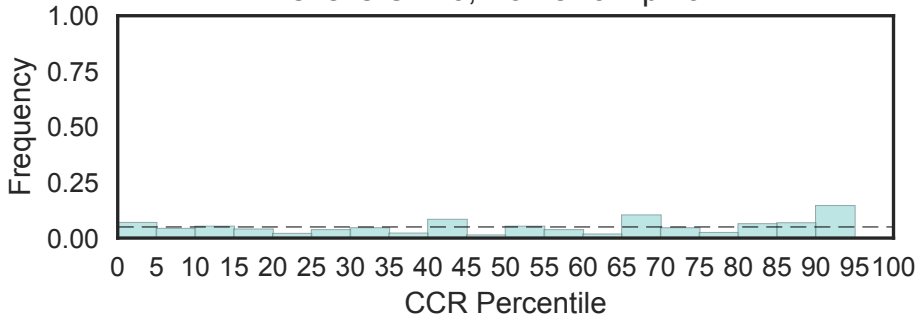

JNK\_SAPK-associated protein-1  
(Jnk-SapK\_ap\_N, N=4)

Fisher's OR: 6.98; Bonferroni p-val: 1

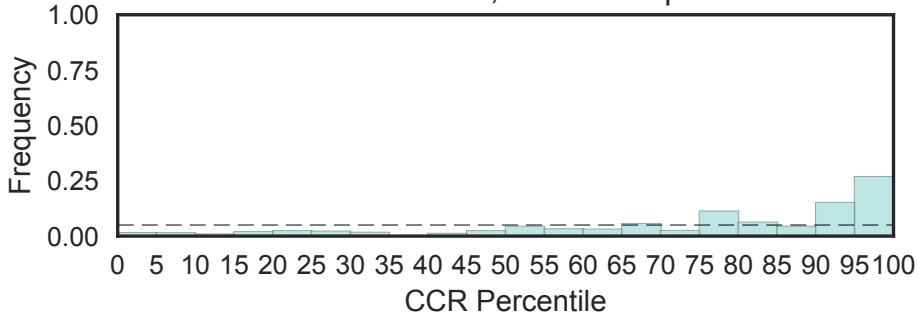

Josephin  
(Josephin, N=3)

Fisher's OR: 1.19; Bonferroni p-val: 1

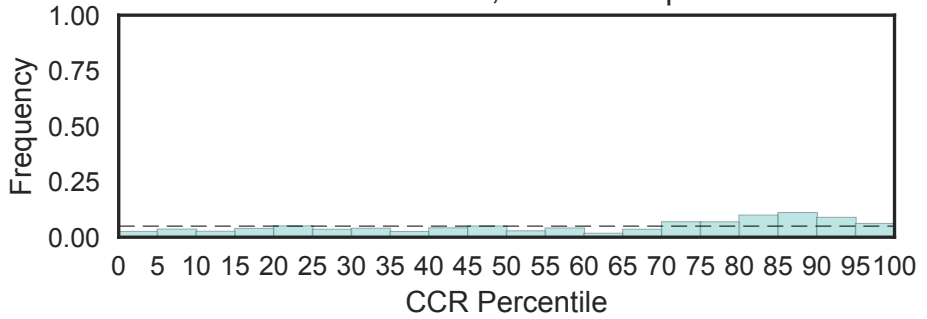

# Joubert syndrome-associated (Joubert, N=1)

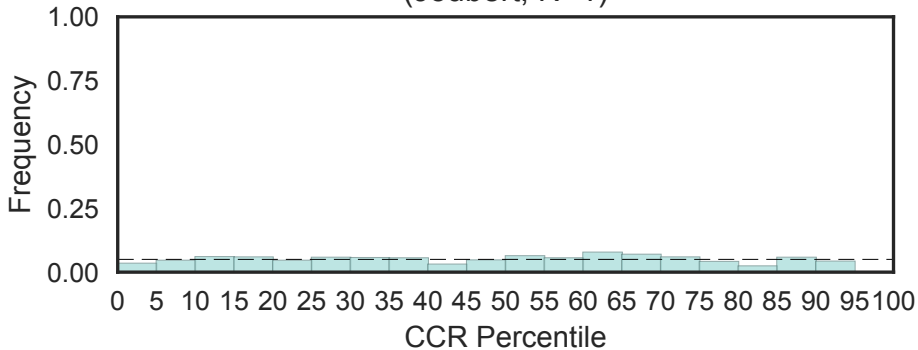

Jun-like transcription factor  
(Jun, N=3)

Fisher's OR: 3.47; Bonferroni p-val: 1

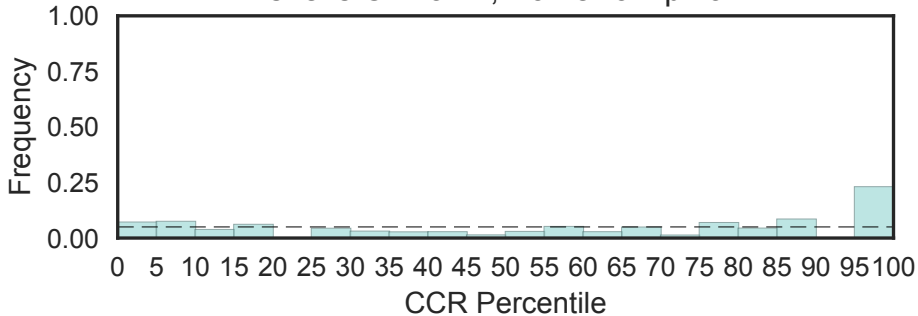

# Susceptibility to monomelic amyotrophy (K1377, N=1)

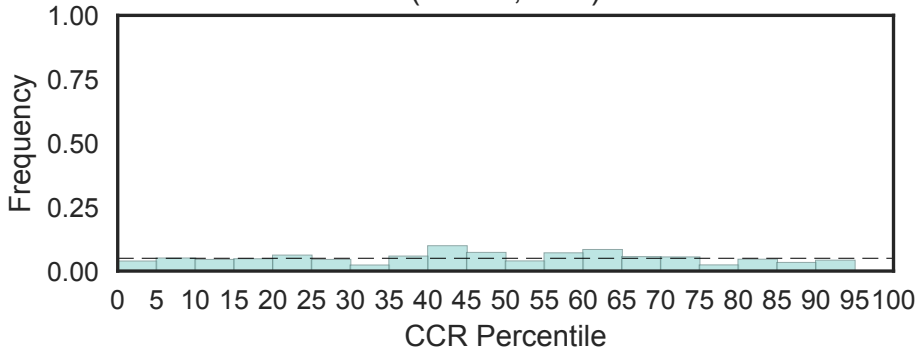

K167R (NUC007) repeat  
(K167R, N=16)

Fisher's OR: 0.144; Bonferroni p-val: 1

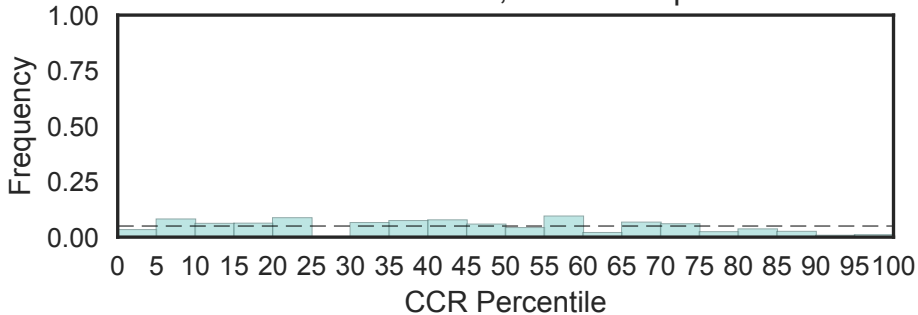

Kinase associated domain 1  
(KA1, N=5)

Fisher's OR: 4; Bonferroni p-val: 1

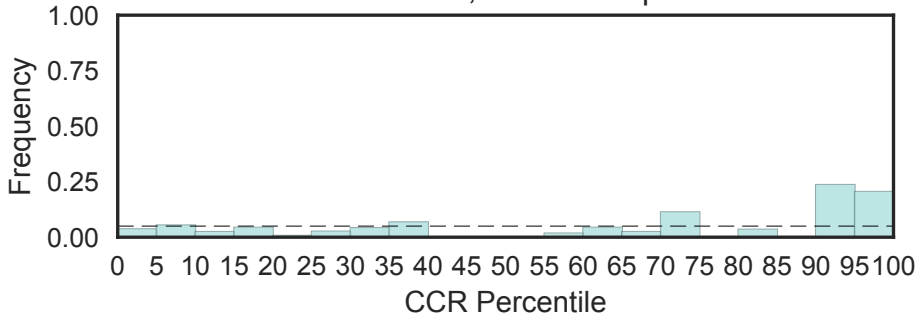



Kidney-associated antigen 1  
(KAAG1, N=2)

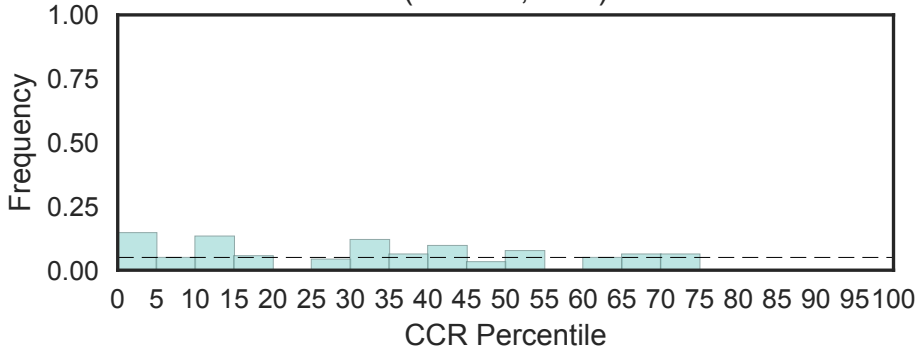

Kinesin-associated protein (KAP)  
(KAP, N=1)

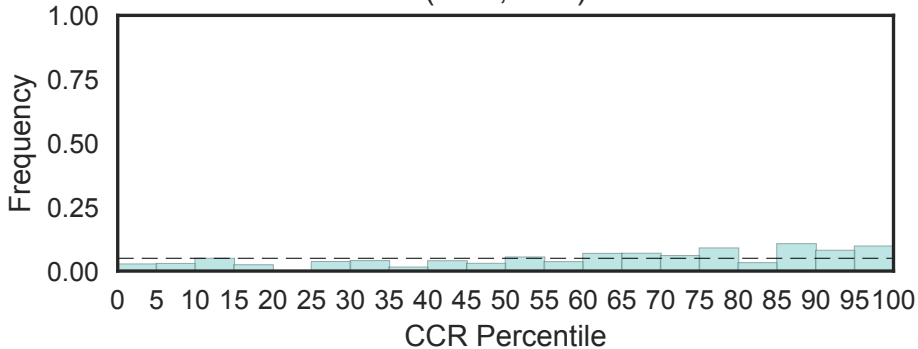

KAP family P-loop domain  
(KAP\_NTPase, N=2)

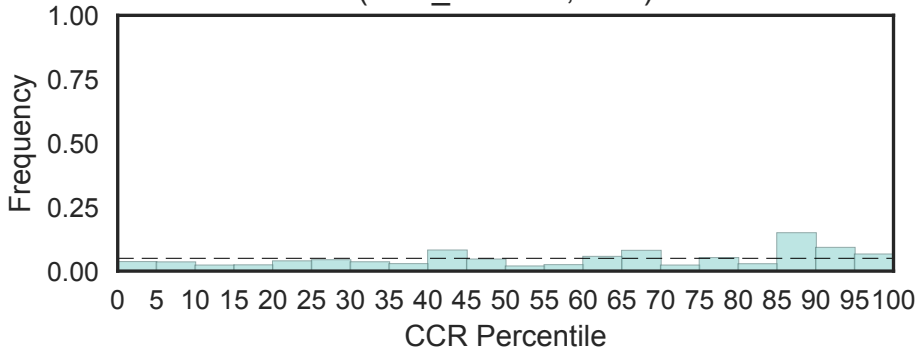

Nuclear envelope localisation domain  
(KASH, N=4)

Fisher's OR: 0; Bonferroni p-val: 1

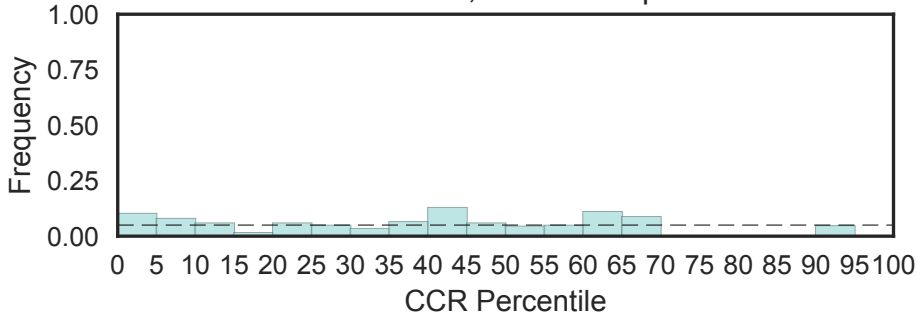

Coiled-coil region of CCDC155 or KASH  
(KASH\_CCD, N=1)

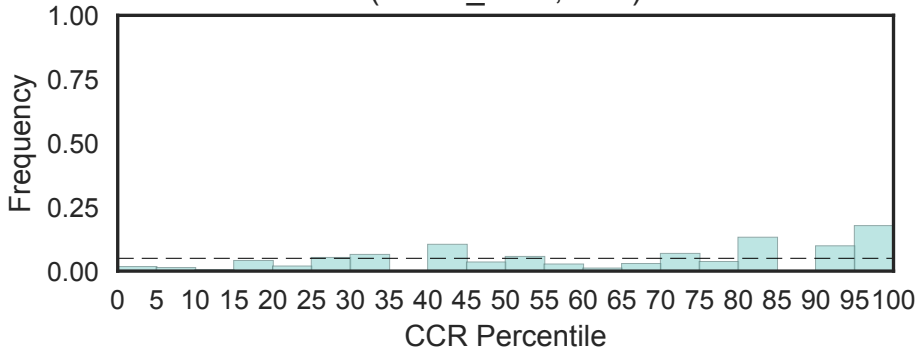

Ketoacyl-synthetase C-terminal extension  
(KAsynt\_C\_assoc, N=1)

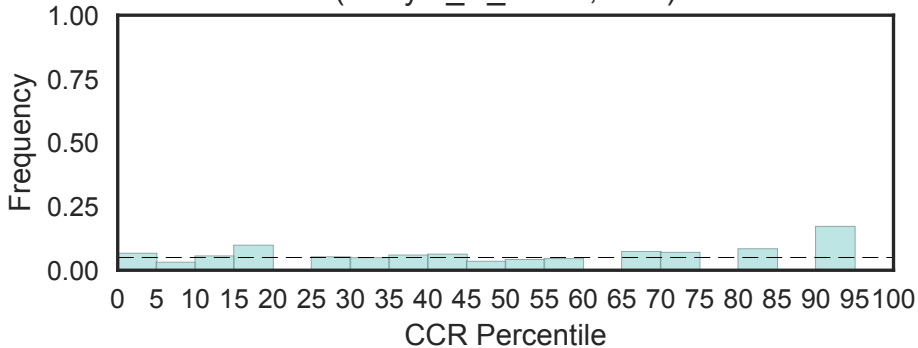

KIF-1 binding protein C terminal  
(KBP\_C, N=1)

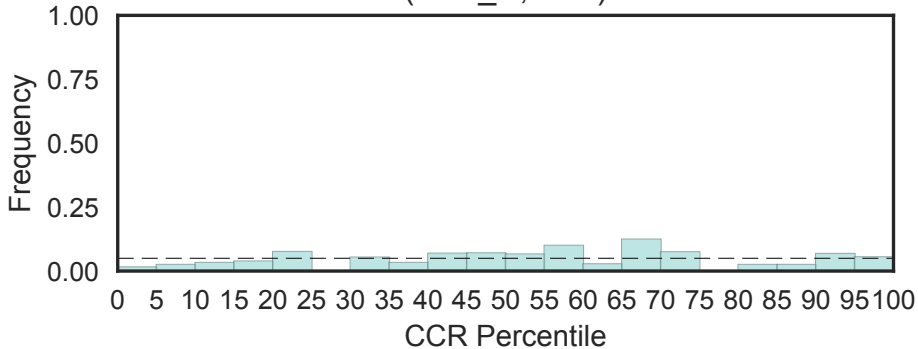

# Unstructured region on Potassium channel subunit alpha KvLQT2 (KCNQ2\_u3, N=1)

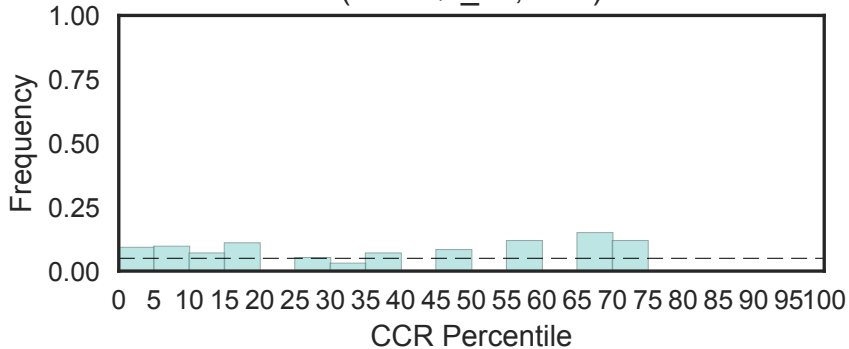



Ankyrin-G binding motif of KCNQ2-3  
(KCNQC3-Ank-G\_bd, N=2)

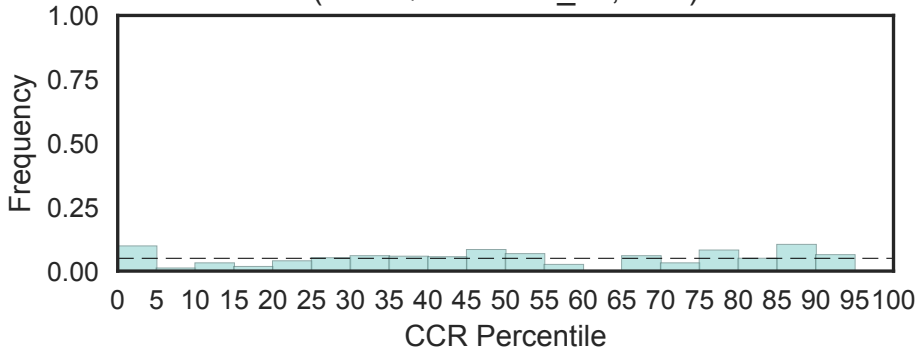

KCNQ voltage-gated potassium channel  
(KCNQ\_channel, N=5)

Fisher's OR: 1.98; Bonferroni p-val: 1

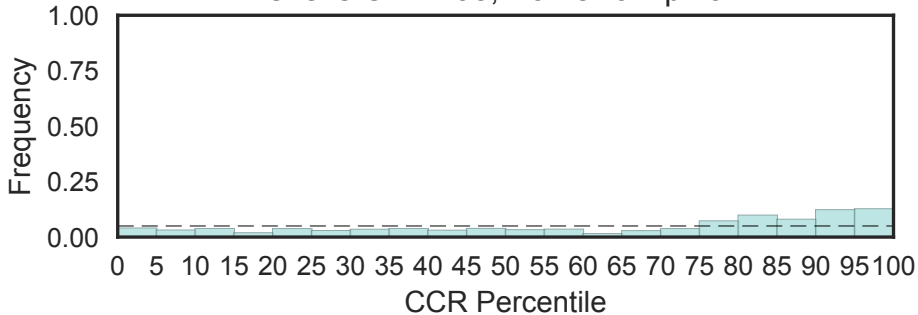

# KELK-motif containing domain of MRCK Ser/Thr protein kinase (KELK, N=2)

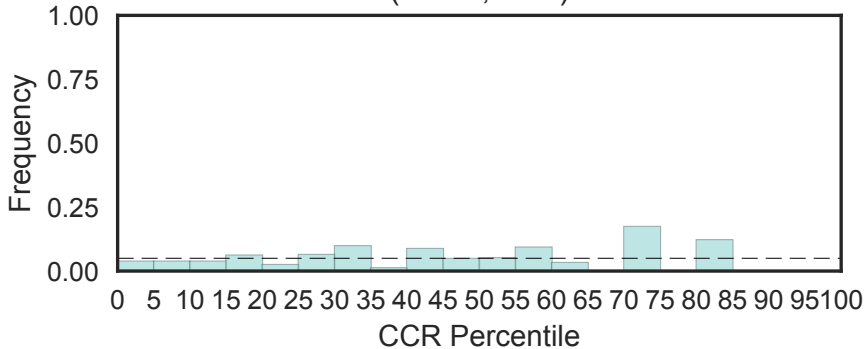

KHA, dimerisation domain of potassium ion channel  
(KHA, N=1)

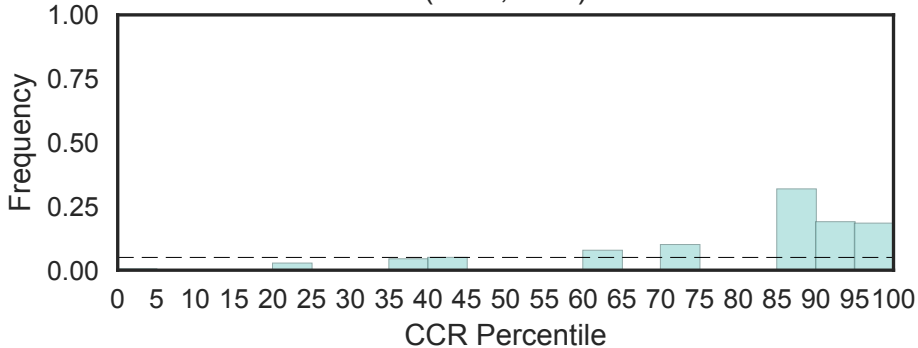

KH domain  
(KH\_1, N=88)

Fisher's OR: 6.79; Bonferroni p-val: 8.94e-35

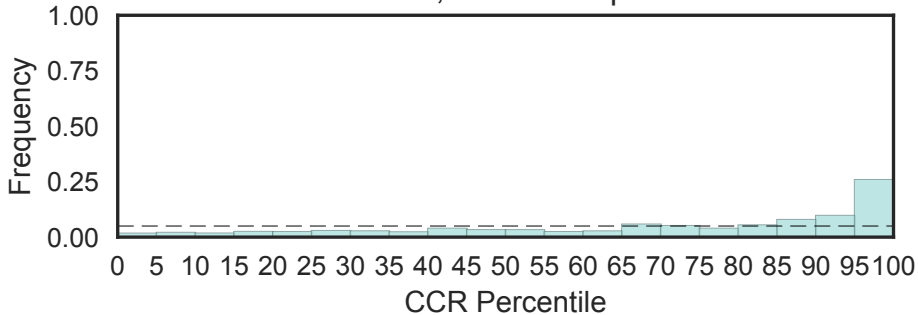

KH domain  
(KH\_2, N=10)

Fisher's OR: 8.21; Bonferroni p-val: 0.00159

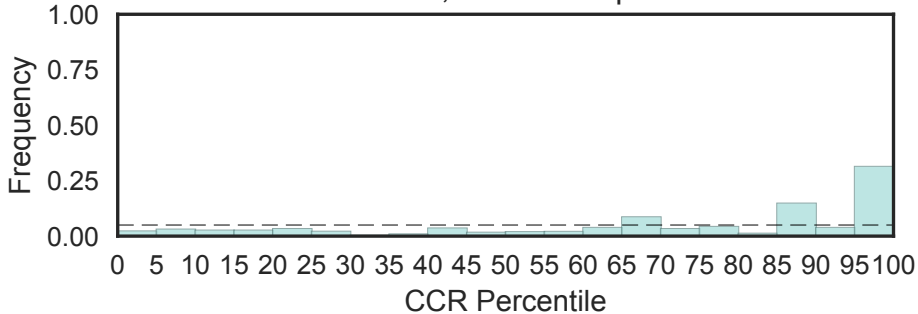

KH domain  
(KH\_6, N=2)

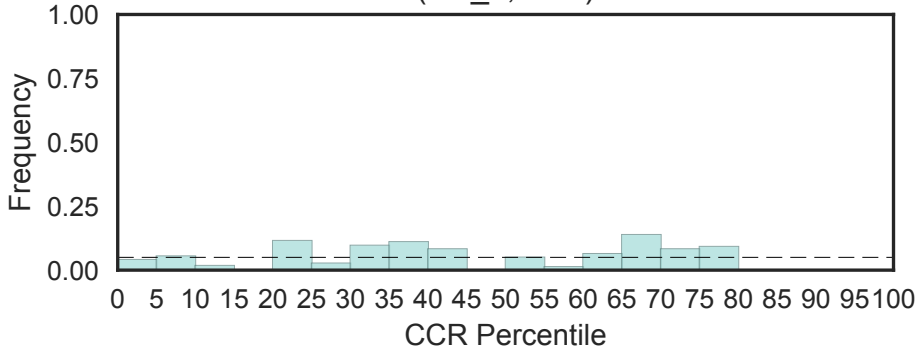

Uncharacterised protein KIAA1328  
(KIAA1328, N=1)

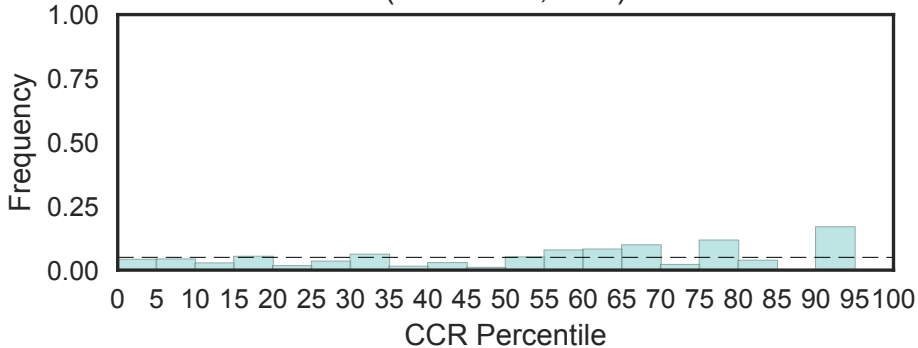



KIAA1430 homologue  
(KIAA1430, N=2)

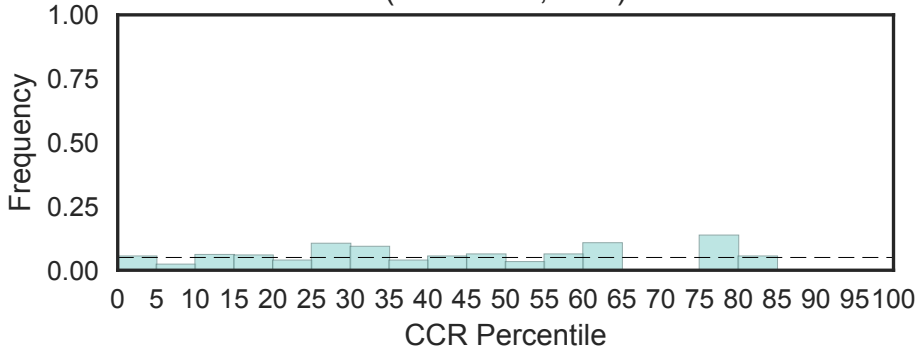

# Kinesin protein 1B

(KIF1B, N=4)

Fisher's OR: 1.59; Bonferroni p-val: 1

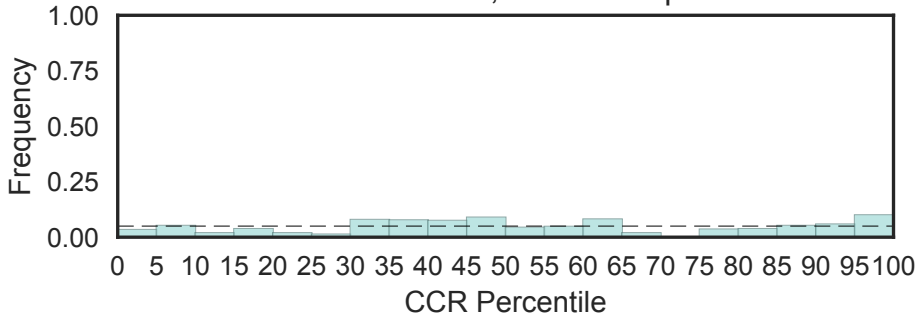

Kinase non-catalytic C-lobe domain  
(KIND, N=3)

Fisher's OR: 0; Bonferroni p-val: 1

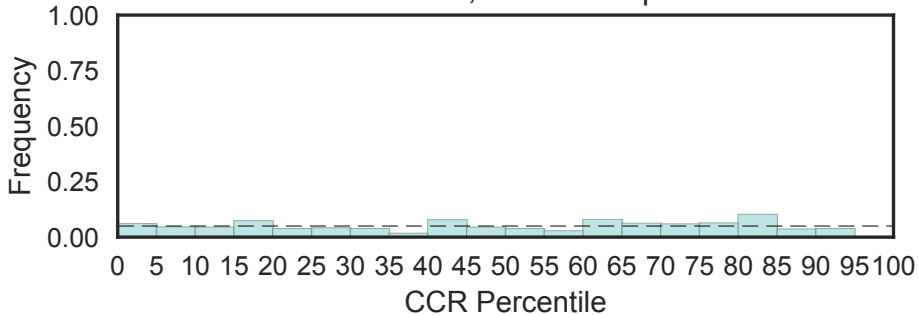

KIX domain  
(KIX, N=2)

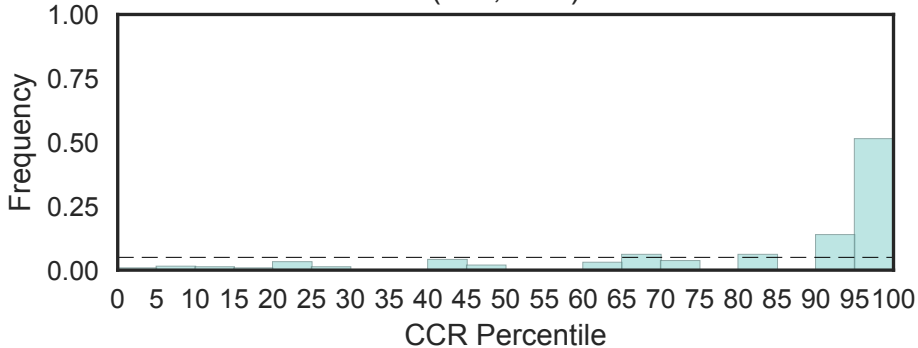

Predicted coiled-coil domain-containing protein  
(KLRAQ, N=1)

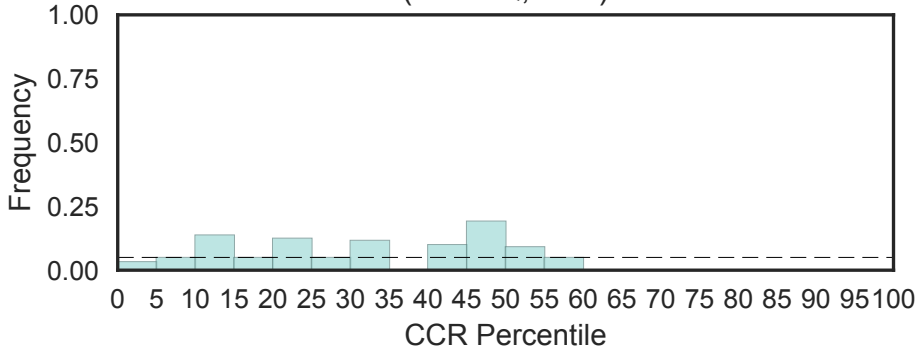

KN motif  
(KN\_motif, N=4)  
Fisher's OR: 0; Bonferroni p-val: 1

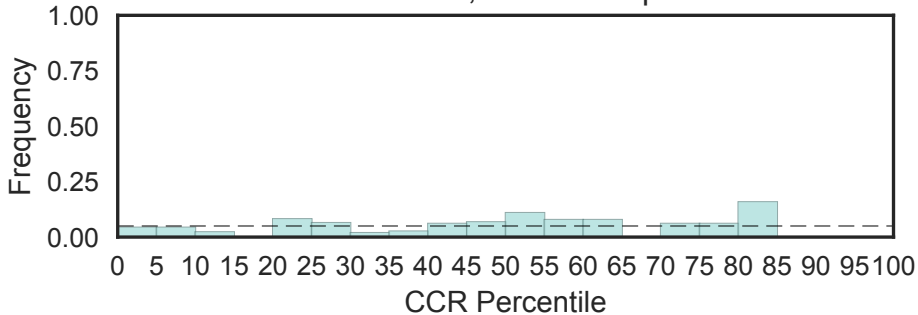

Coiled-coil domain-containing protein (DUF2037)  
(KOG2701, N=1)

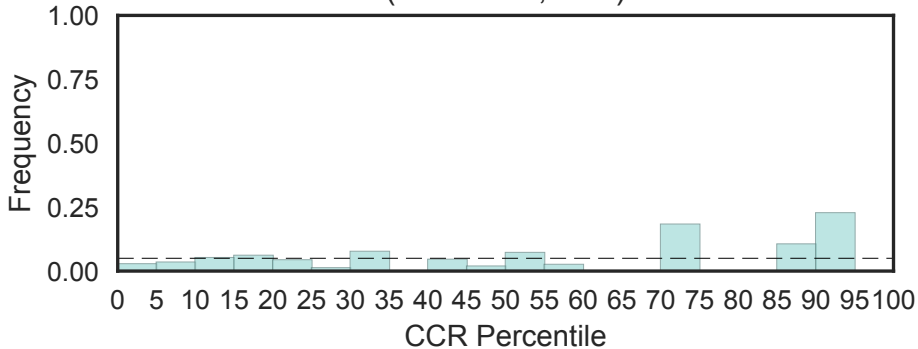

KOW motif  
(KOW, N=6)

Fisher's OR: 0; Bonferroni p-val: 1

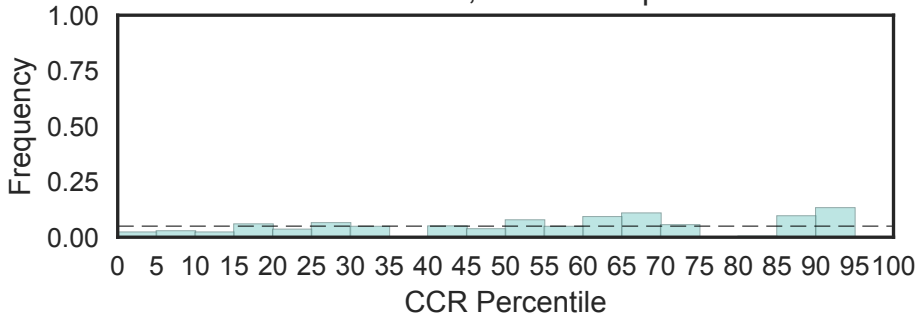



KR domain  
(KR, N=49)

Fisher's OR: 0.181; Bonferroni p-val: 0.0455

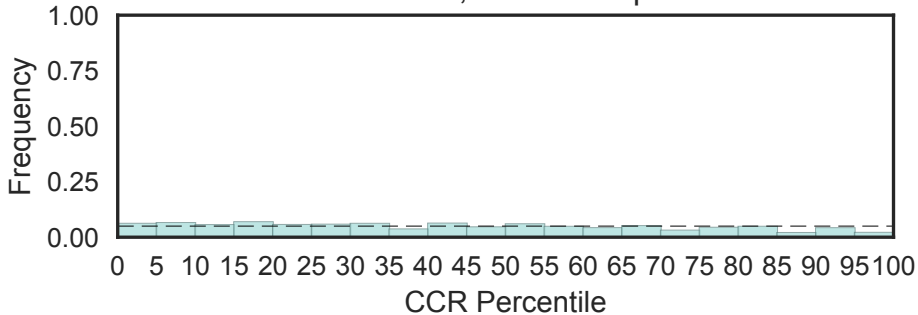

KRAB box  
(KRAB, N=379)

Fisher's OR: 0.33; Bonferroni p-val: 2.17e-05

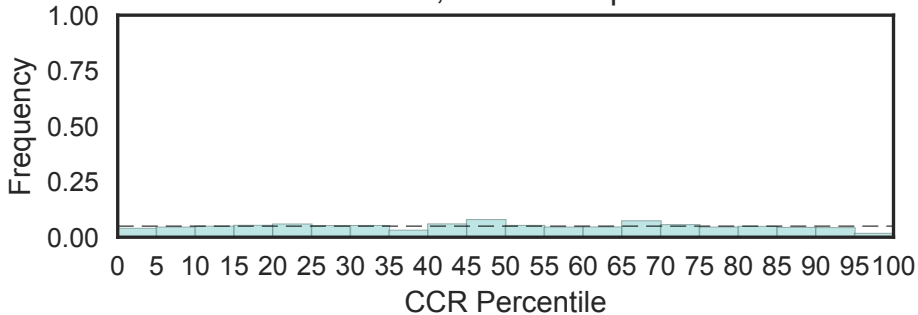

Ki-ras-induced actin-interacting protein-IP3R-interacting domain  
(KRAP\_IP3R\_bind, N=3)

Fisher's OR: 0.961; Bonferroni p-val: 1

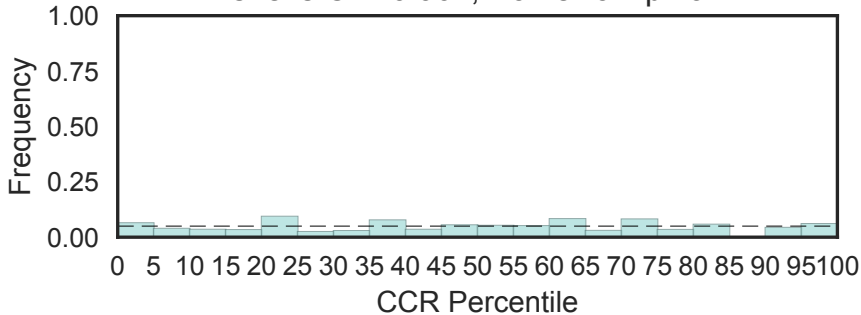

KRBA1 family repeat  
(KRBA1, N=7)

Fisher's OR: 1.3; Bonferroni p-val: 1

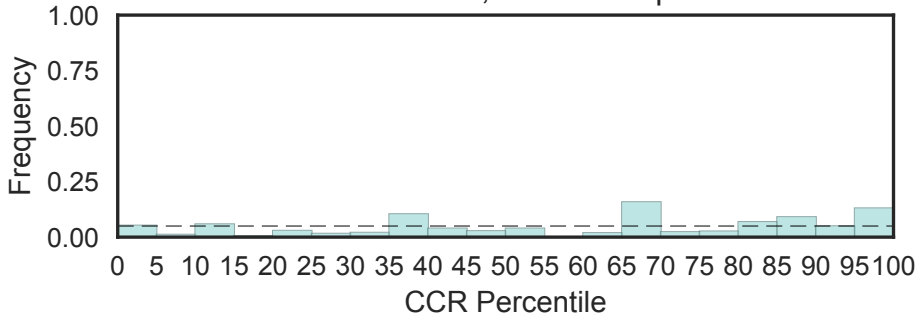

Keratin-associated matrix  
(KRTAP, N=14)

Fisher's OR: 0; Bonferroni p-val: 1

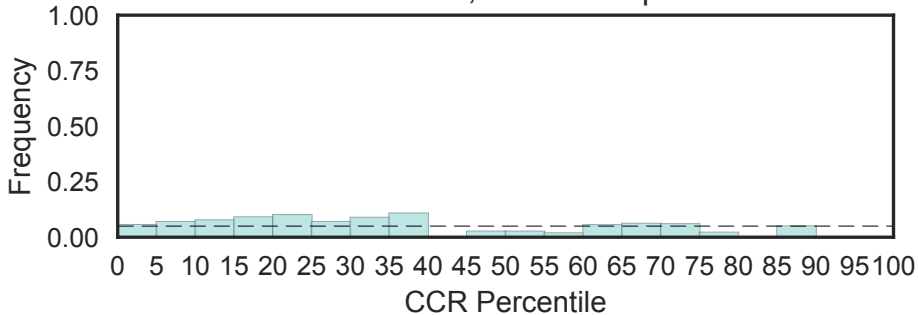

# Keratinocyte differentiation-associated (KRTDAP, N=1)

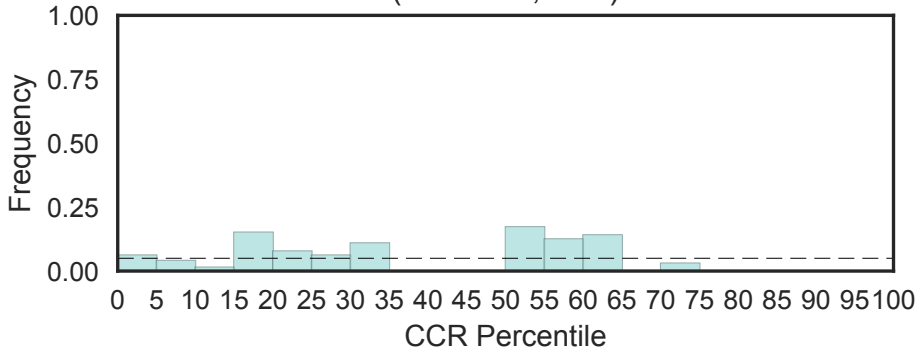

# SAM like domain present in kinase suppressor RAS 1 (KSR1-SAM, N=1)

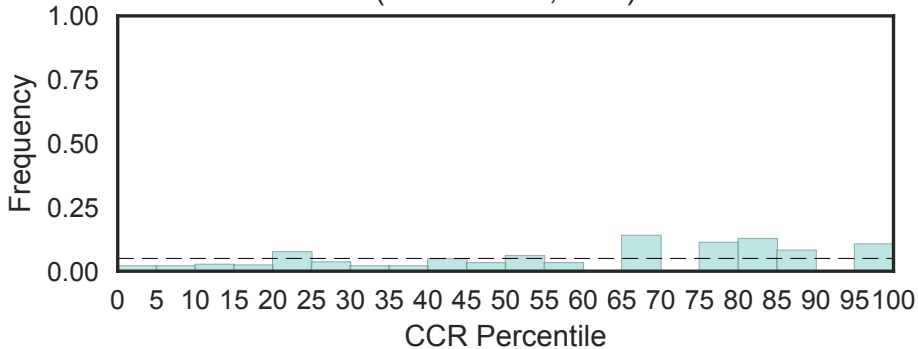

Chromatin associated protein KTI12  
(KTI12, N=3)

Fisher's OR: 0; Bonferroni p-val: 1

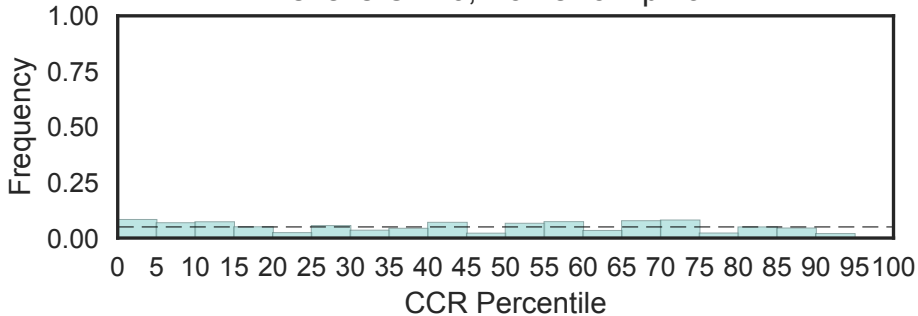



Potassium channel Kv1.4 tandem inactivation domain  
(K\_channel\_TID, N=1)

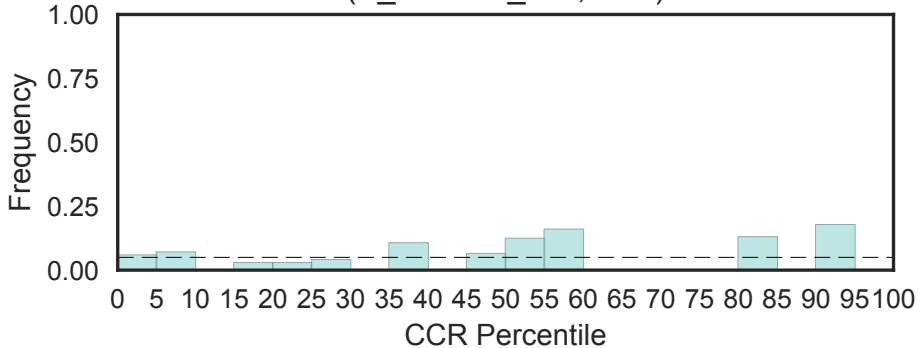

L-lysine 6-monooxygenase (NADPH-requiring)  
(K\_oxygenase, N=6)

Fisher's OR: 0; Bonferroni p-val: 1

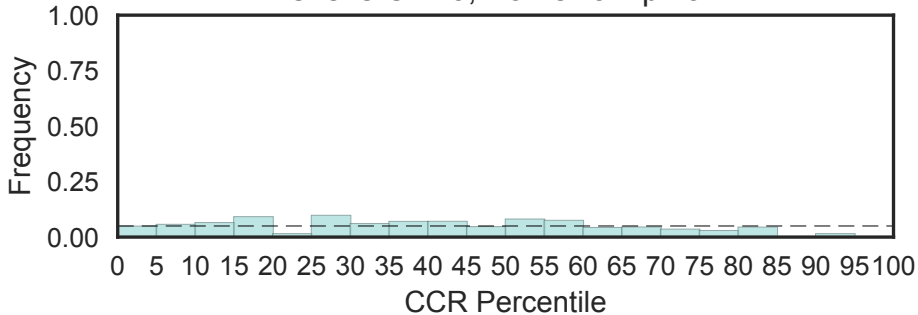

con80 domain of Katanin  
(Katanin\_con80, N=2)

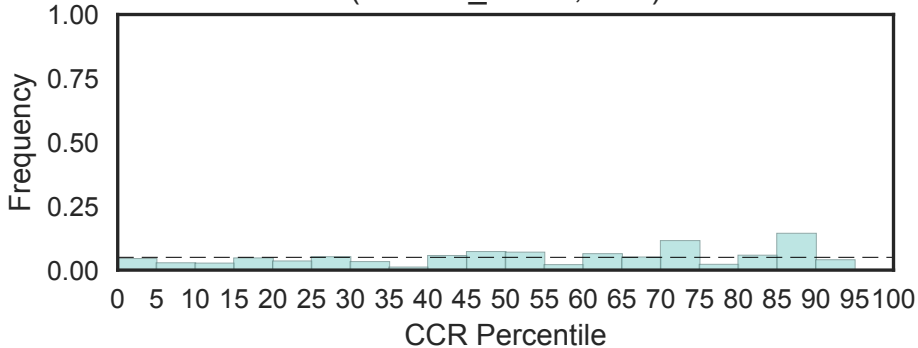

Kazal-type serine protease inhibitor domain  
(Kazal\_1, N=49)

Fisher's OR: 0.291; Bonferroni p-val: 1

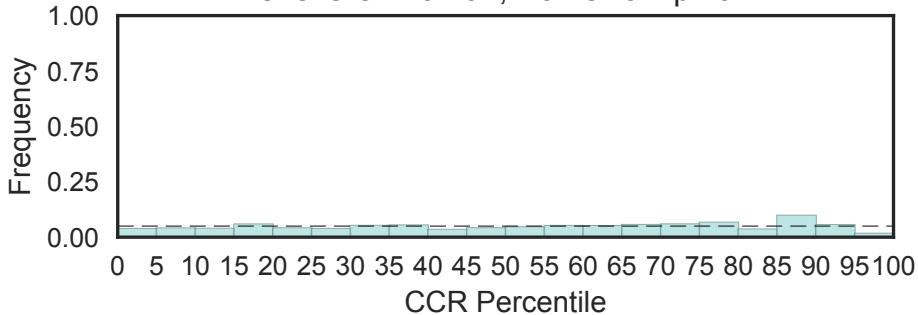

Kazal-type serine protease inhibitor domain  
(Kazal\_2, N=73)

Fisher's OR: 0.283; Bonferroni p-val: 1

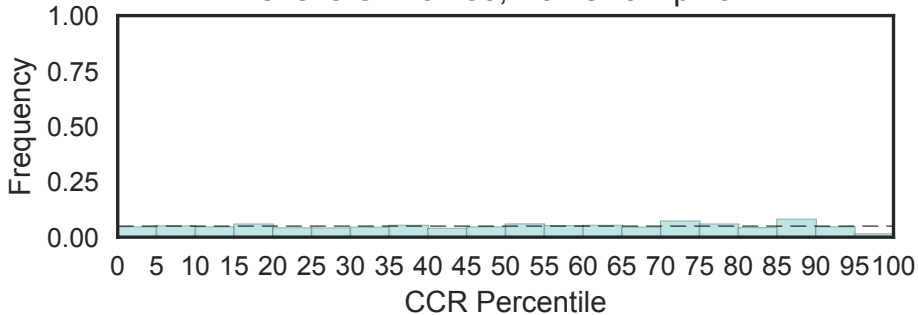

KCNMB2, ball and chain domain  
(KcnmB2\_inactiv, N=1)

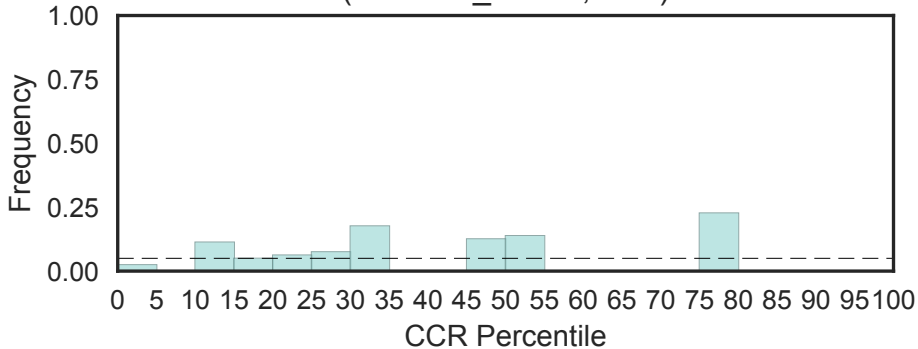

Lipopolysaccharide kinase (Kdo/WaaP) family  
(Kdo, N=45)

Fisher's OR: 2.82; Bonferroni p-val: 0.00285

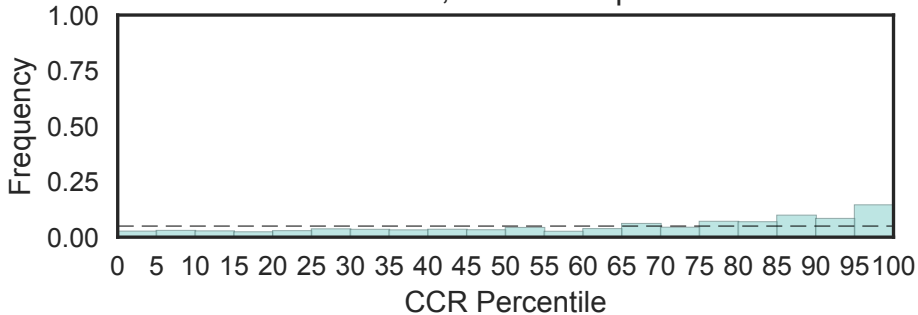

# Kelch motif

(Kelch\_1, N=232)

Fisher's OR: 1.32; Bonferroni p-val: 1

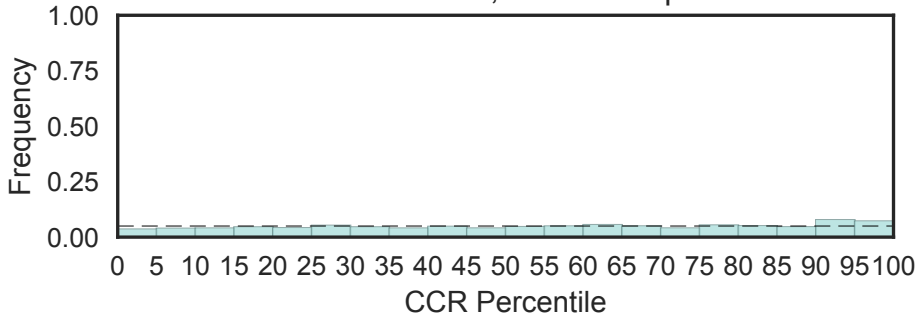



# Kelch motif

(Kelch\_2, N=54)

Fisher's OR: 1.77; Bonferroni p-val: 1

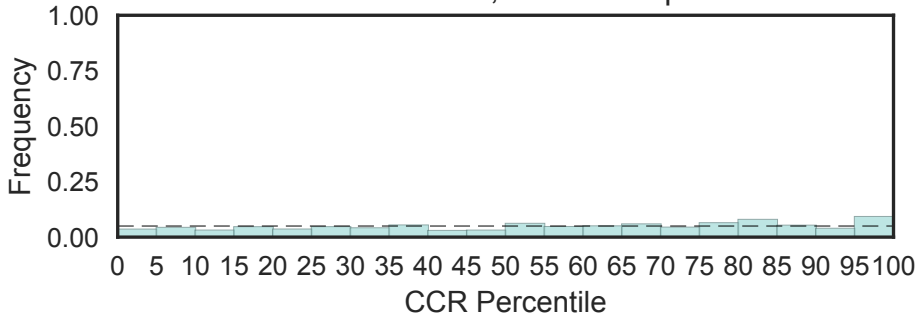

Galactose oxidase, central domain  
(Kelch\_3, N=71)

Fisher's OR: 1.94; Bonferroni p-val: 1

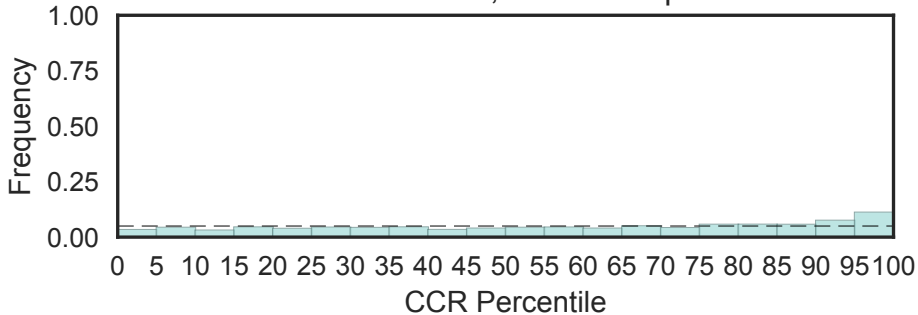

Galactose oxidase, central domain  
(Kelch\_4, N=81)

Fisher's OR: 1.46; Bonferroni p-val: 1

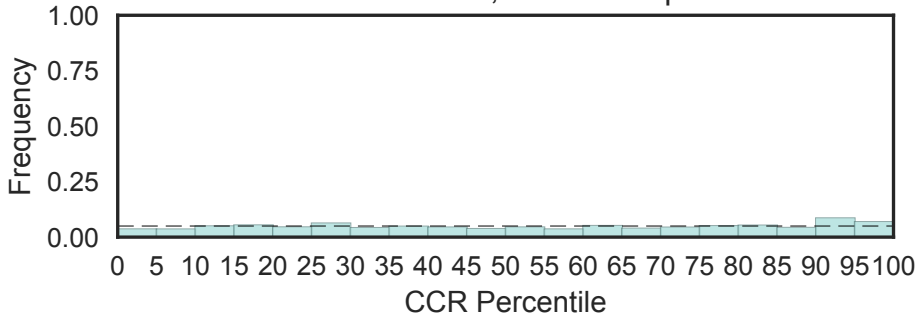

# Kelch motif

(Kelch\_5, N=29)

Fisher's OR: 2.05; Bonferroni p-val: 1

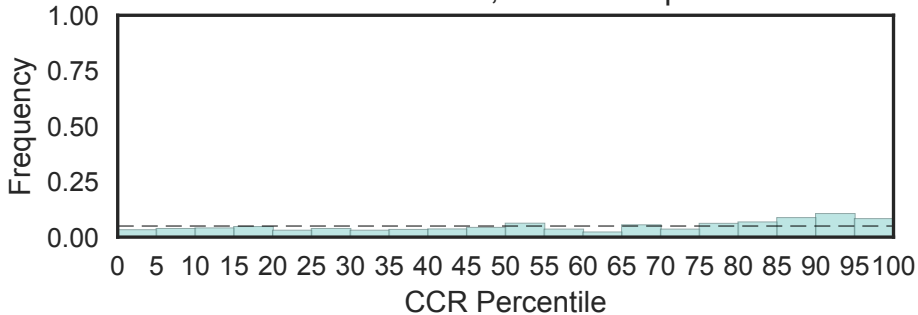

# Kelch motif

(Kelch\_6, N=88)

Fisher's OR: 1.62; Bonferroni p-val: 1

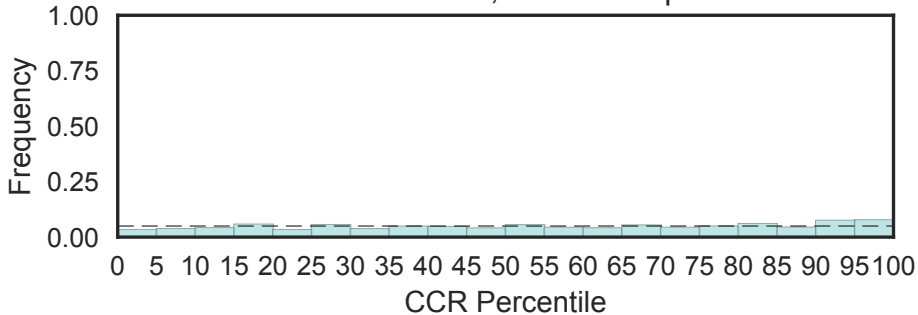

Keratin type II head  
(Keratin\_2\_head, N=26)

Fisher's OR: 0.108; Bonferroni p-val: 1

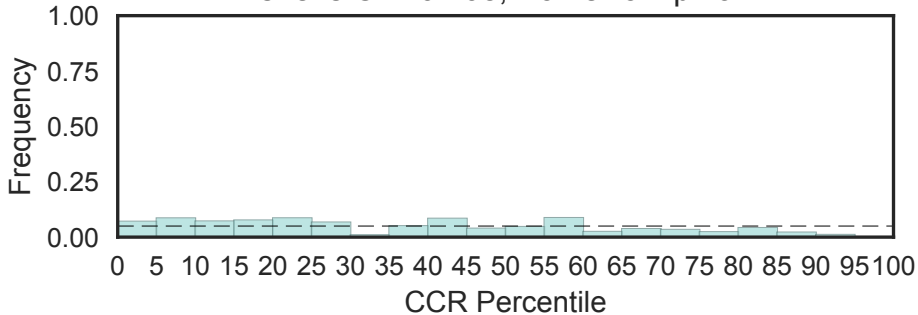

Keratin type II cytoskeletal 1 tail  
(Keratin\_2\_tail, N=1)

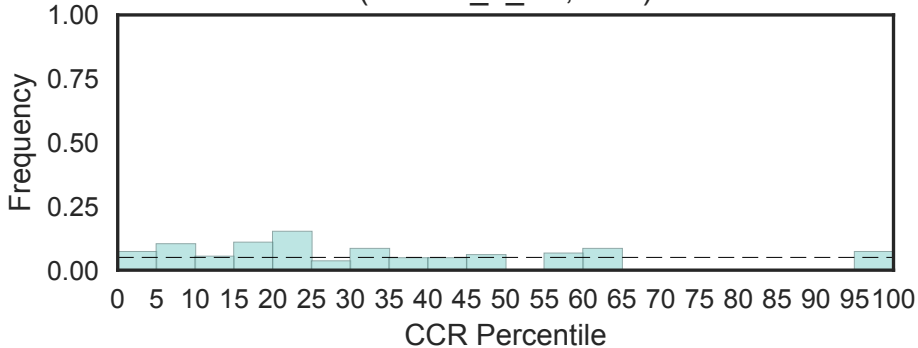

Keratin, high sulfur B2 protein  
(Keratin\_B2, N=16)  
Fisher's OR: 0; Bonferroni p-val: 1

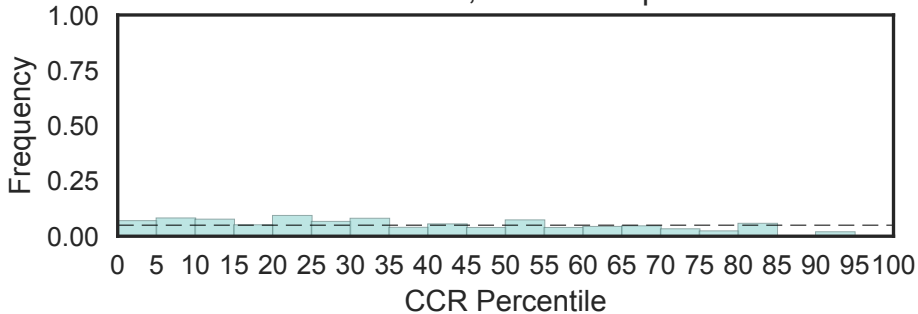



Keratin, high sulfur B2 protein  
(Keratin\_B2\_2, N=118)  
Fisher's OR: 0; Bonferroni p-val: 0.354

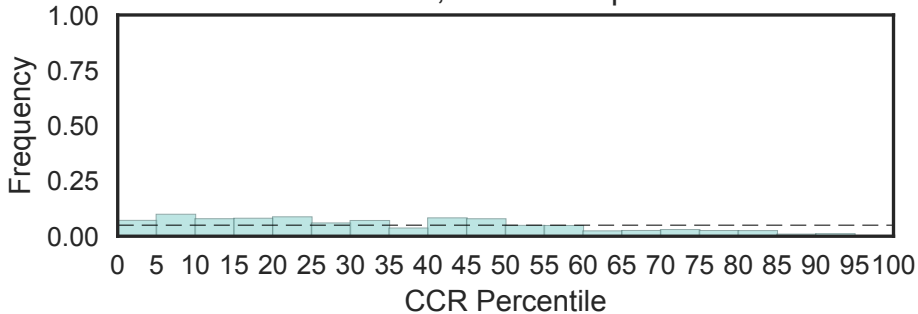

Keratinocyte-associated protein 2  
(Keratin\_assoc, N=2)

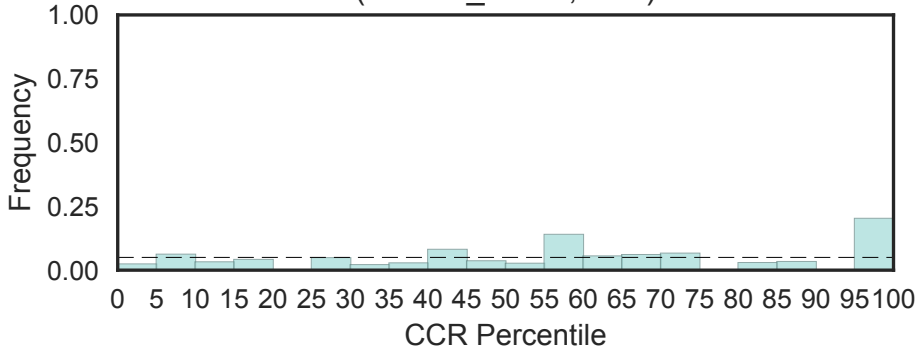

Keratin, high-sulphur matrix protein  
(Keratin\_matx, N=3)

Fisher's OR: 0; Bonferroni p-val: 1

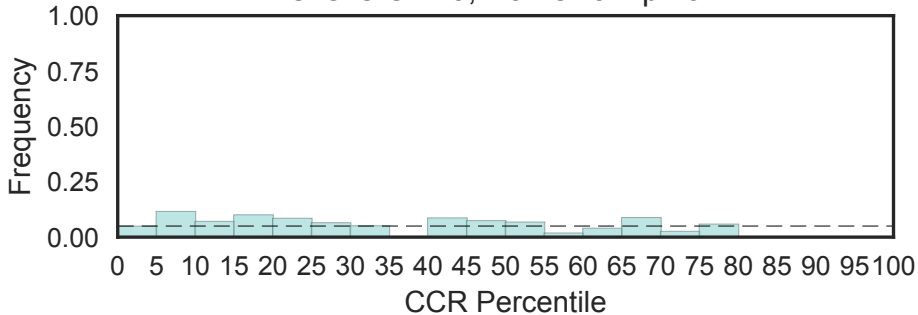

Beta-ketoacyl synthase, C-terminal domain  
(Ketoacyl-synt\_C, N=2)

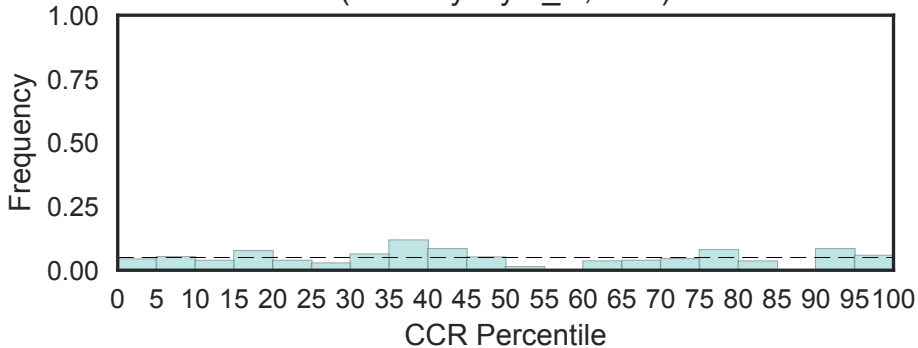

Domain of Kin17 curved DNA-binding protein  
(Kin17\_mid, N=1)

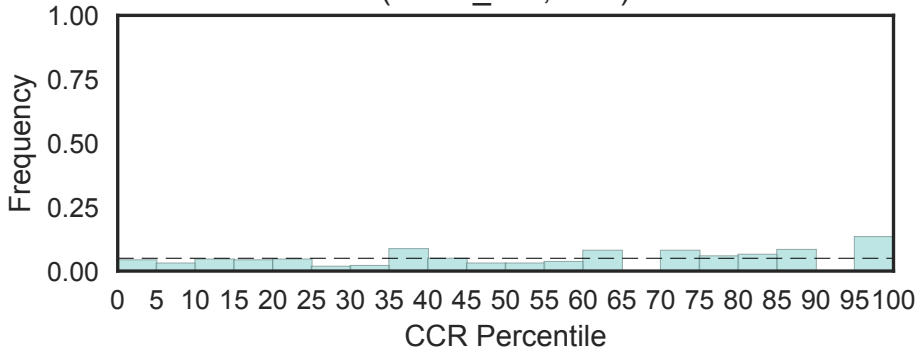

Kinase-like  
(Kinase-like, N=81)

Fisher's OR: 3.32; Bonferroni p-val: 3.52e-17

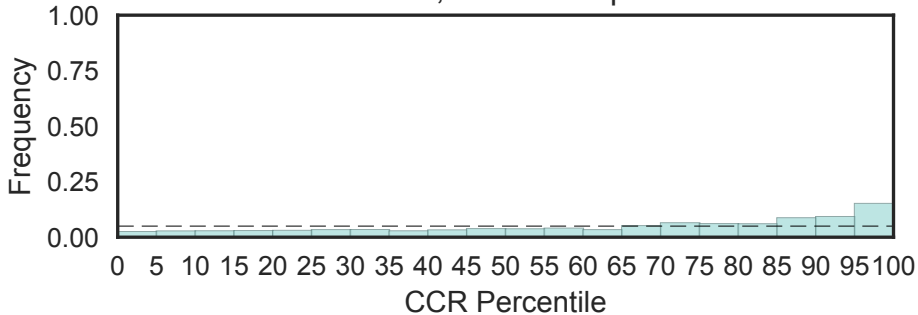

Kinesin motor domain  
(Kinesin, N=45)

Fisher's OR: 1.69; Bonferroni p-val: 0.286

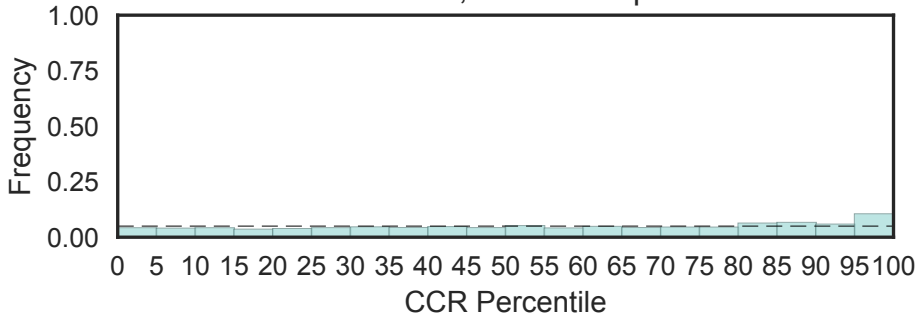

Kinesin-associated  
(Kinesin\_assoc, N=8)

Fisher's OR: 1.29; Bonferroni p-val: 1

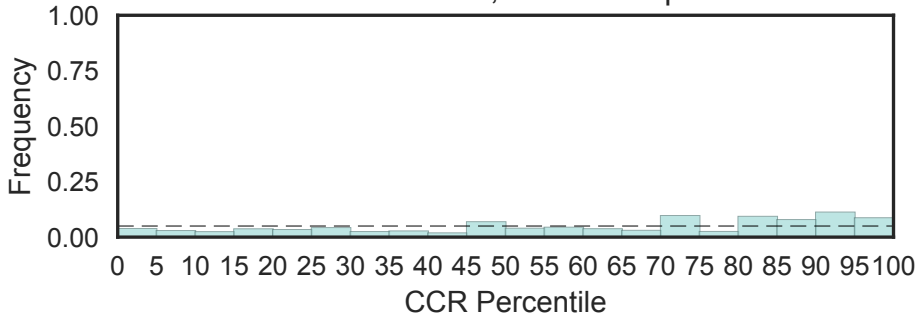



Uncharacterised protein family, YAP/Alf4/glomulin  
(Kinetochoor\_Ybp2, N=1)

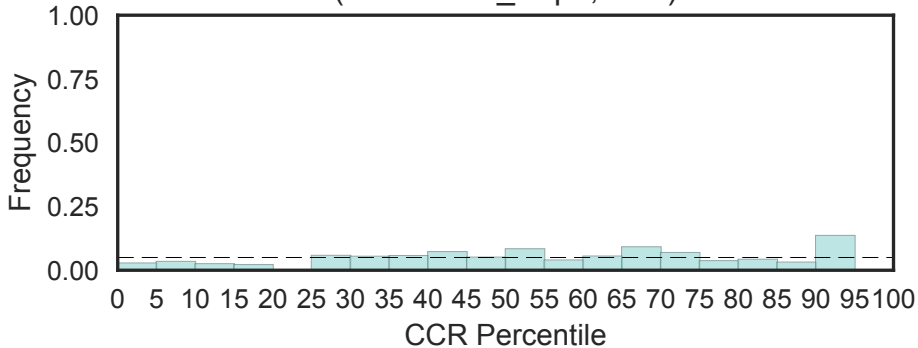

Kinocilin protein  
(Kinocilin, N=1)

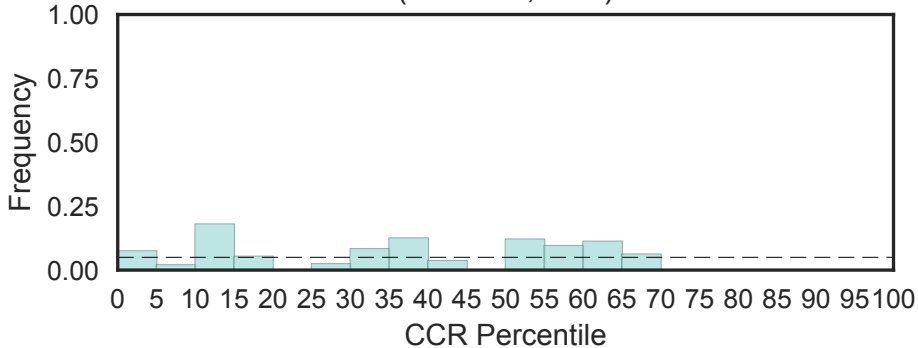

# Kisspeptin (Kisspeptin, N=1)

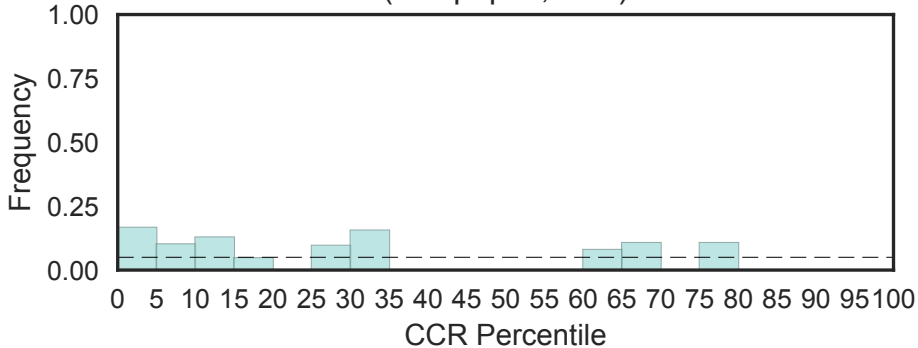

KRI1-like family  
(Kri1, N=1)

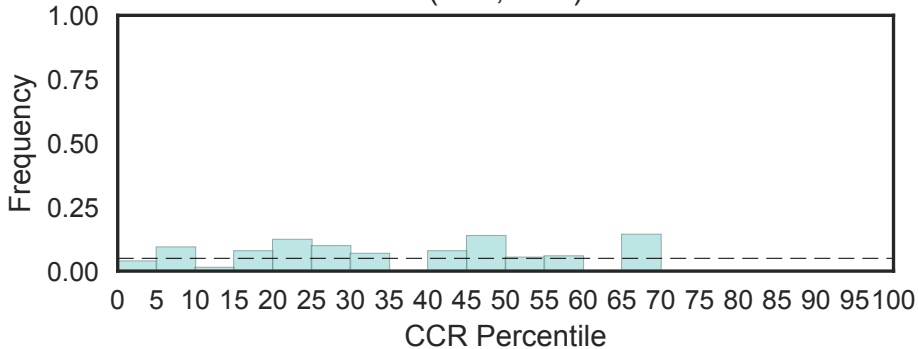

KRI1-like family C-terminal  
(Kri1\_C, N=1)

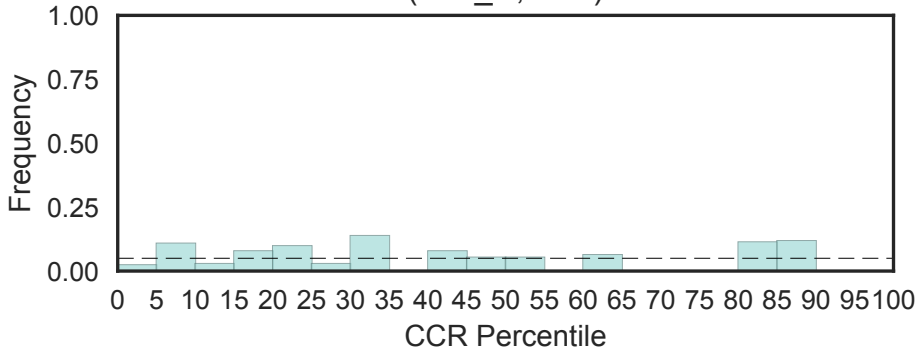

Kringle domain  
(Kringle, N=43)

Fisher's OR: 0.221; Bonferroni p-val: 1

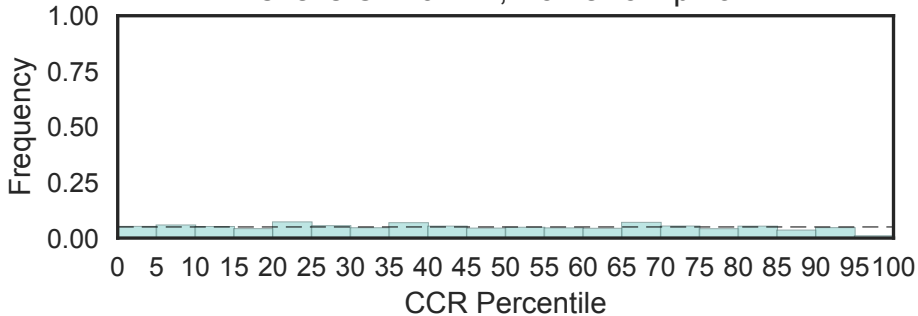

Ku70/Ku80 beta-barrel domain  
(Ku, N=2)

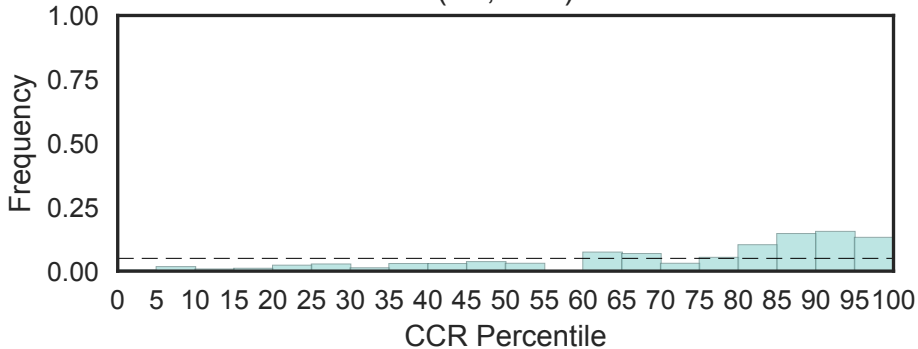

Ku70/Ku80 C-terminal arm  
(Ku\_C, N=2)

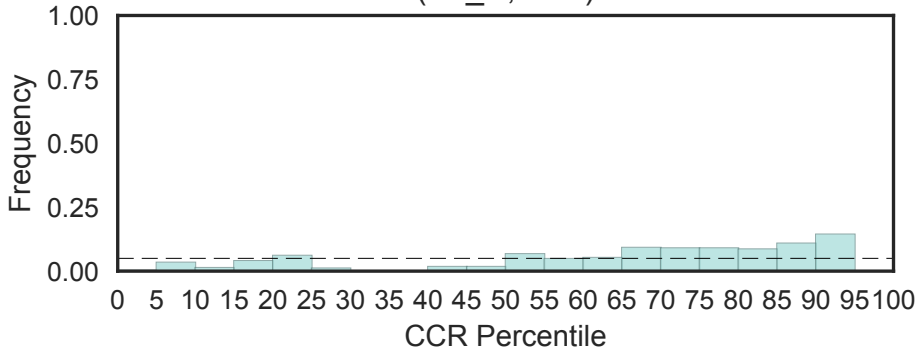



Ku70/Ku80 N-terminal alpha/beta domain  
(Ku\_N, N=2)

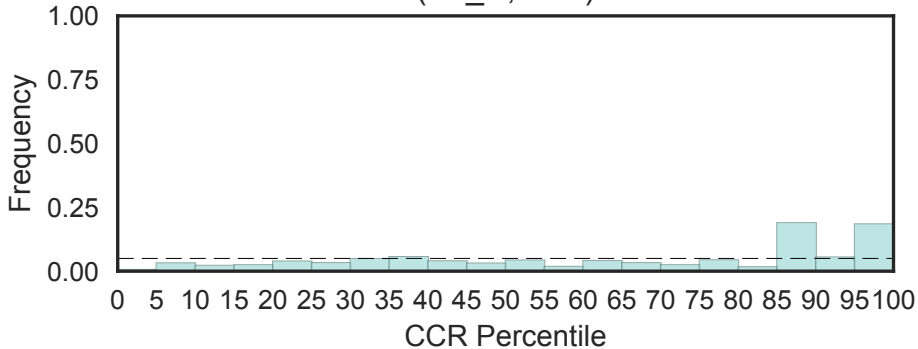

Ku C terminal domain like  
(Ku\_PK\_bind, N=1)

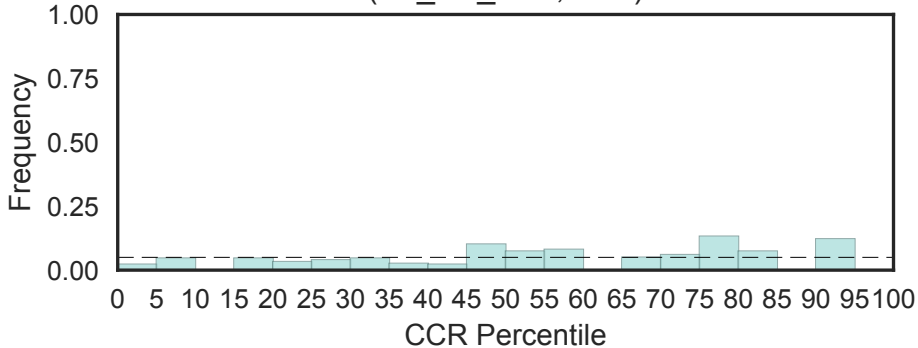

Kunitz/Bovine pancreatic trypsin inhibitor domain  
(Kunitz\_BPTI, N=28)

Fisher's OR: 0; Bonferroni p-val: 1

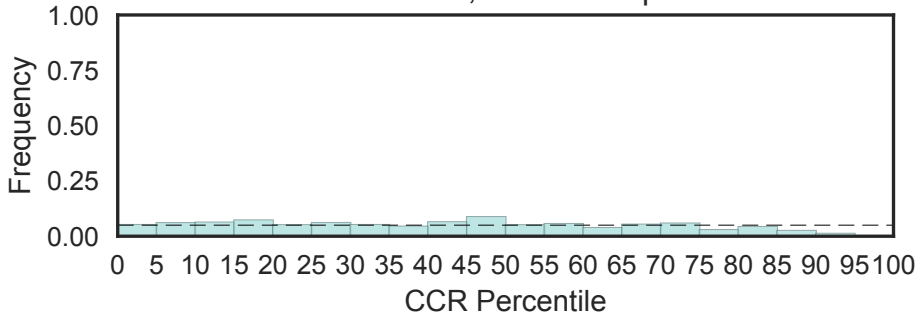

Kv2 voltage-gated K<sup>+</sup> channel  
(Kv2channel, N=3)

Fisher's OR: 0.632; Bonferroni p-val: 1

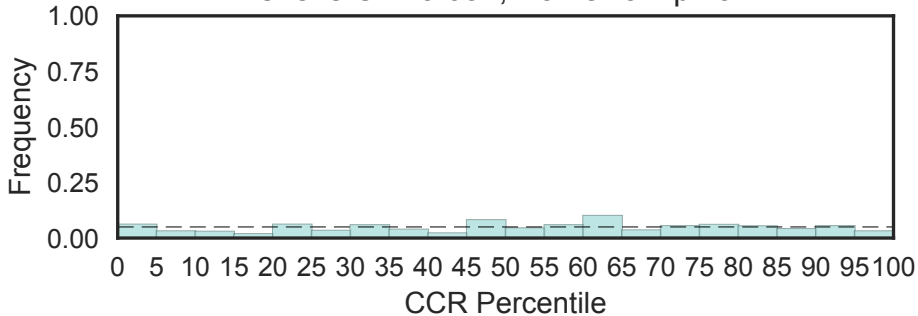

Uncharacterized conserved protein  
(KxDL, N=1)

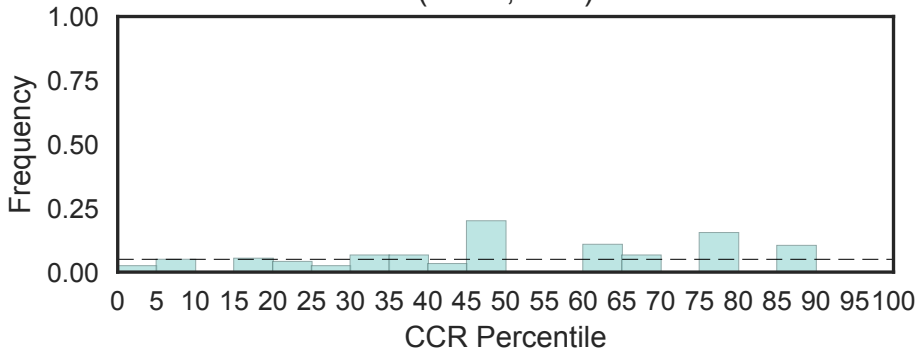

L27 domain  
(L27, N=13)

Fisher's OR: 0.491; Bonferroni p-val: 1

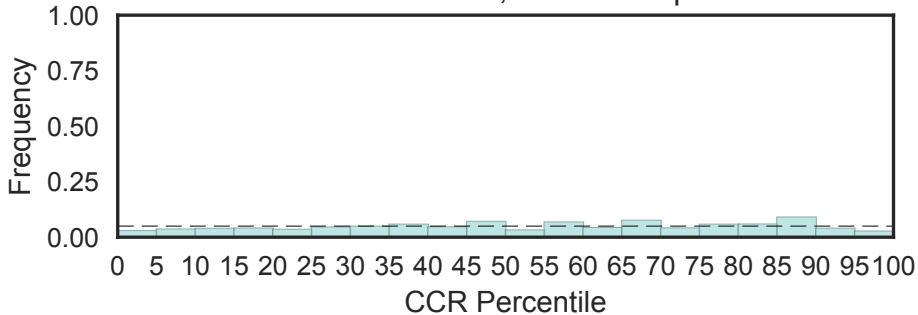

L27\_1  
(L27\_1, N=2)

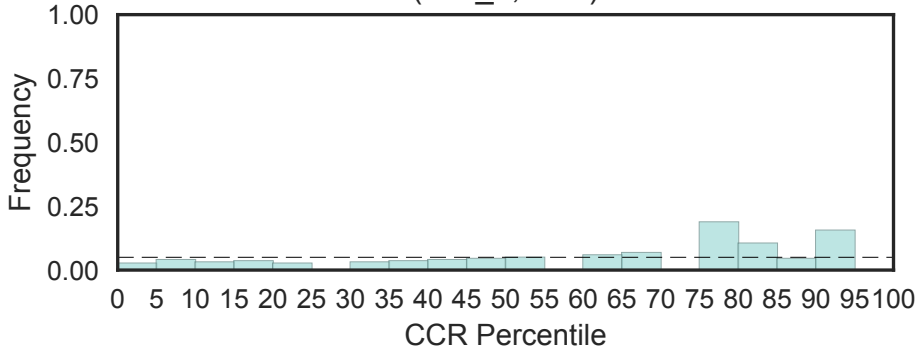

L27\_2  
(L27\_2, N=2)

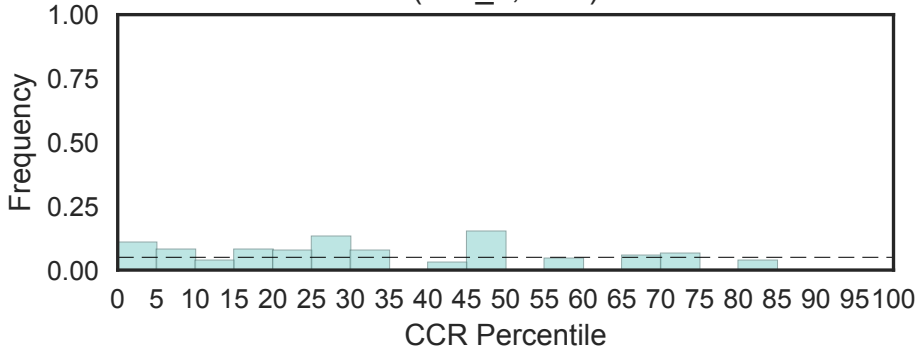



L27\_N  
(L27\_N, N=1)

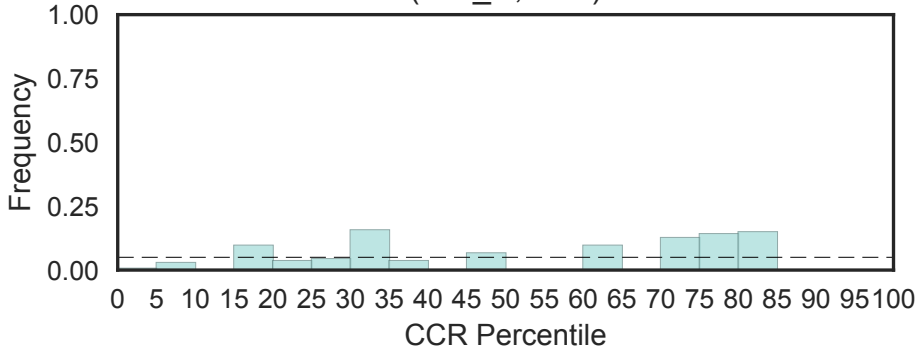

Mitochondrial ribosomal protein L51 / S25 / CI-B8 domain  
(L51\_S25\_CI-B8, N=5)

Fisher's OR: 0; Bonferroni p-val: 1

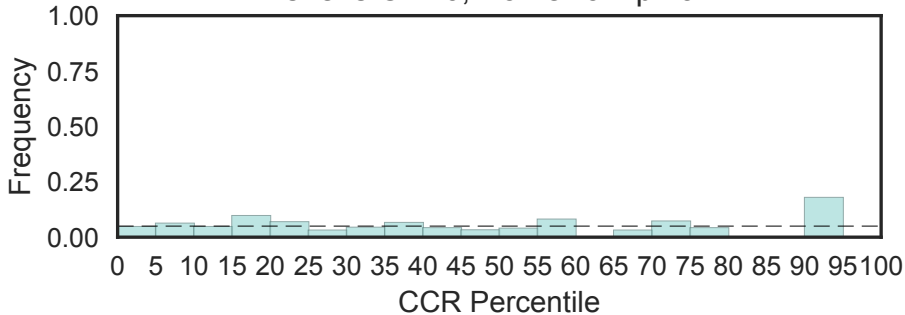

L6 membrane protein  
(L6\_membrane, N=6)  
Fisher's OR: 0; Bonferroni p-val: 1

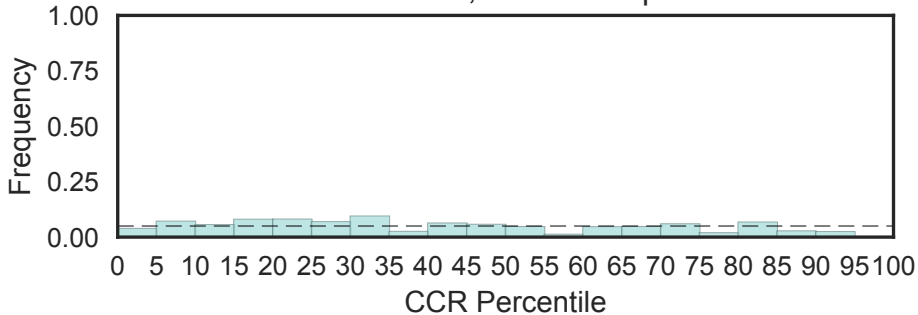

LAG1, DNA binding  
(LAG1-DNAbind, N=2)

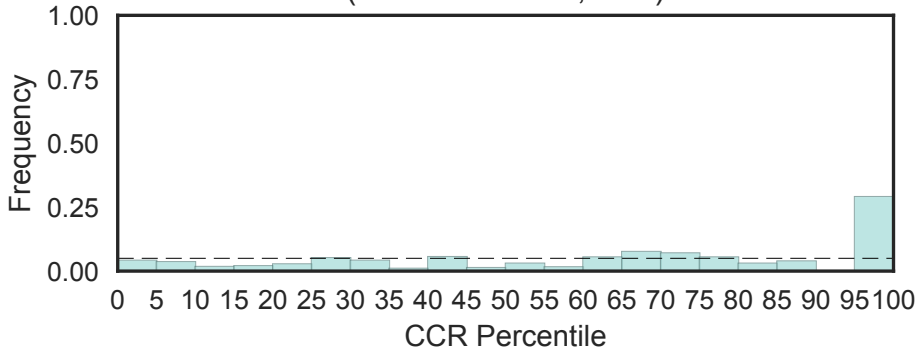

# Late endosomal/lysosomal adaptor and MAPK and MTOR activator (LAMTOR, N=1)

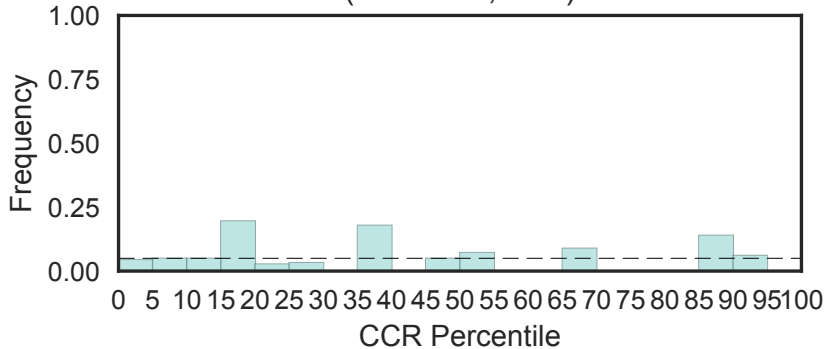

# Ragulator complex protein LAMTOR5 (LAMTOR5, N=1)

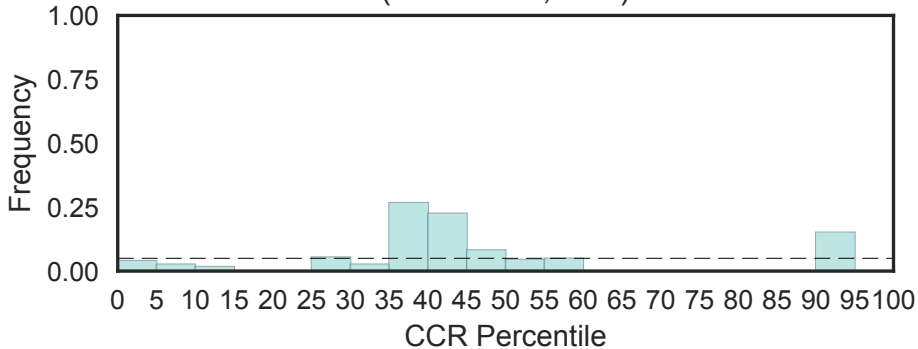

Lanthionine synthetase C-like protein  
(LANC\_like, N=2)

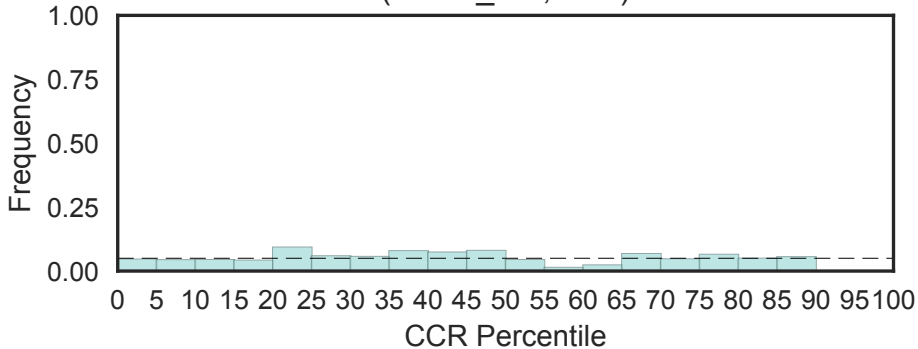

Lamina-associated polypeptide 1C (LAP1C)  
(LAP1C, N=2)

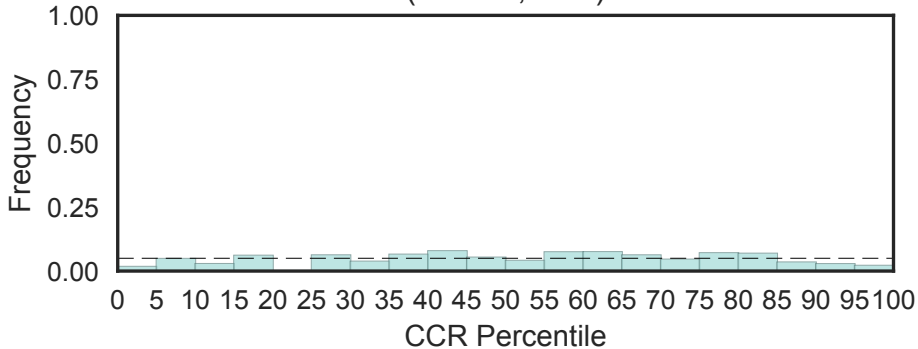



Lamina-associated polypeptide 2 alpha  
(LAP2alpha, N=2)

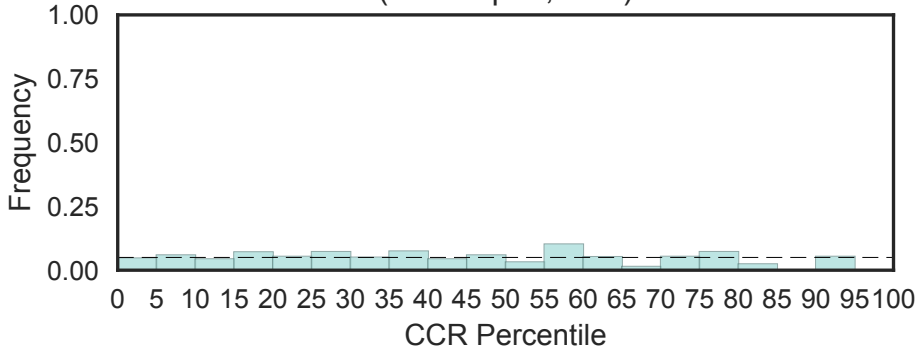

# Lung adenoma susceptibility protein 2 (LAS2, N=1)

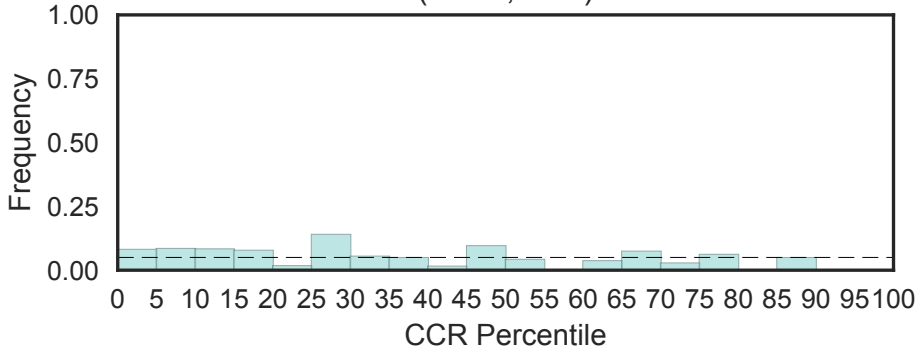

# Linker for activation of T-cells (LAT, N=1)

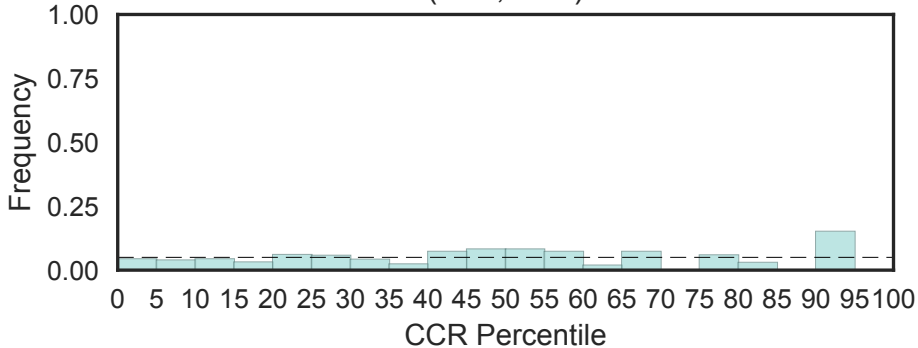

Linker for activation of T-cells family member 2  
(LAT2, N=2)

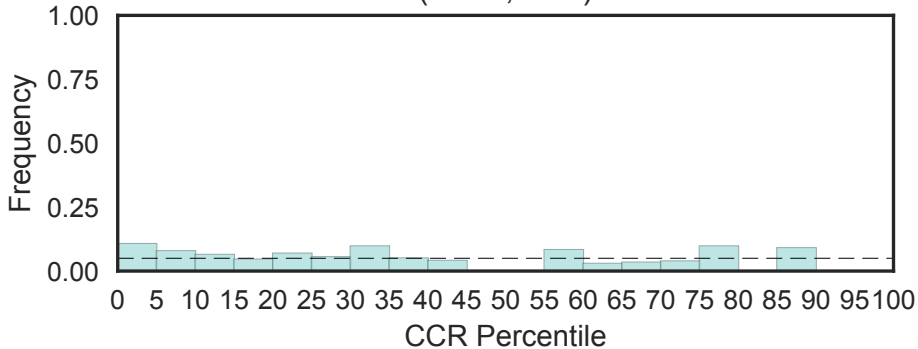

# Lymphocyte activation family X (LAX, N=1)

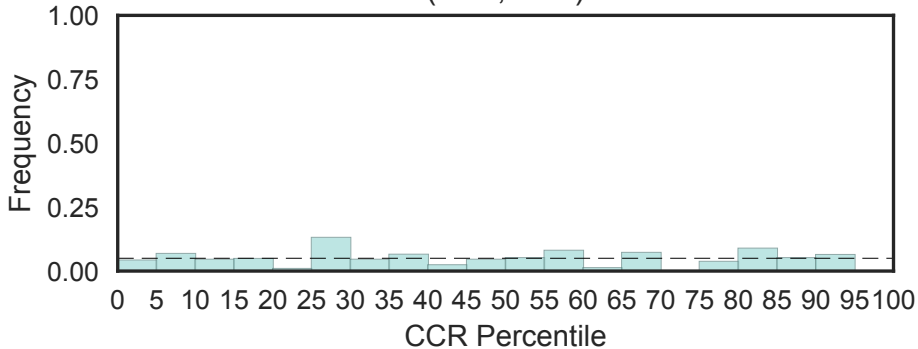

LBP / BPI / CETP family, N-terminal domain  
(LBP\_BPI\_CETP, N=13)

Fisher's OR: 0.111; Bonferroni p-val: 1

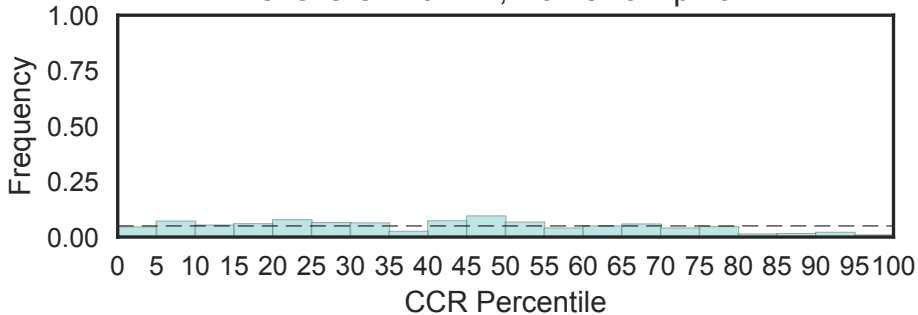

LBP / BPI / CETP family, C-terminal domain  
(LBP\_BPI\_CETP\_C, N=10)

Fisher's OR: 0; Bonferroni p-val: 1

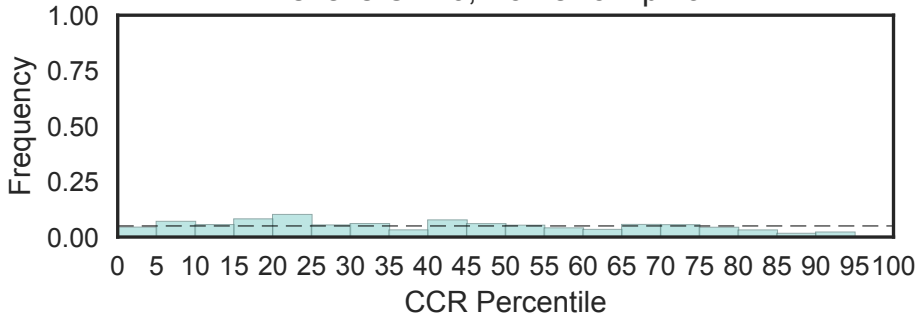

Lamin-B receptor of TUDOR domain  
(LBR\_tudor, N=1)

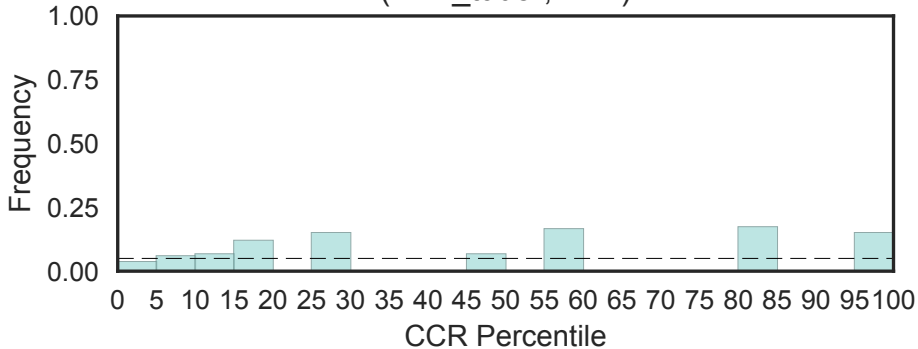



Lecithin:cholesterol acyltransferase  
(LCAT, N=4)

Fisher's OR: 0.7; Bonferroni p-val: 1

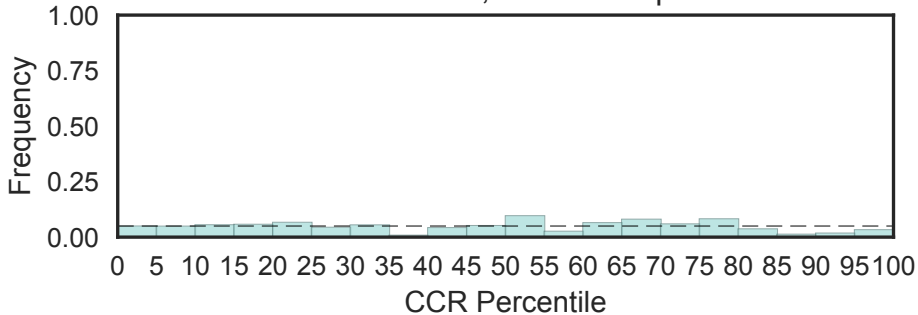

LCCL domain  
(LCCL, N=8)

Fisher's OR: 0.674; Bonferroni p-val: 1

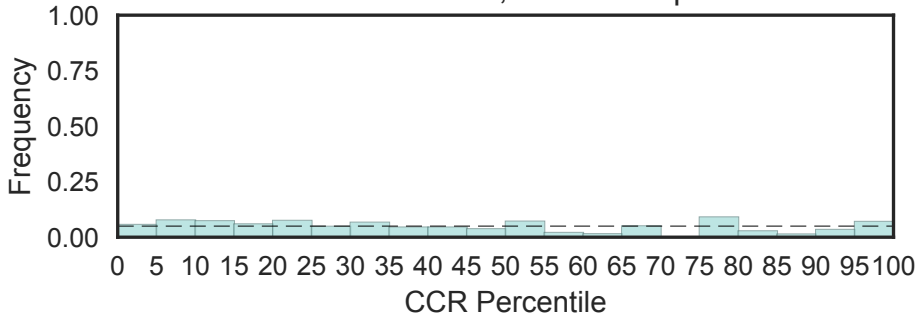

Late cornified envelope  
(LCE, N=17)

Fisher's OR: 0; Bonferroni p-val: 1

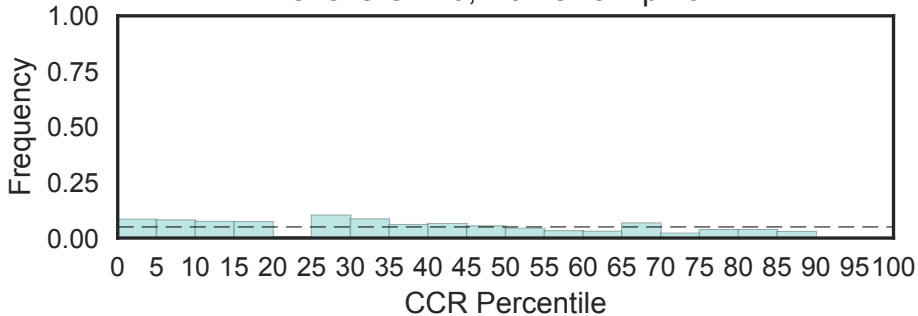

Late cornified envelope protein 6A family  
(LCE6A, N=1)

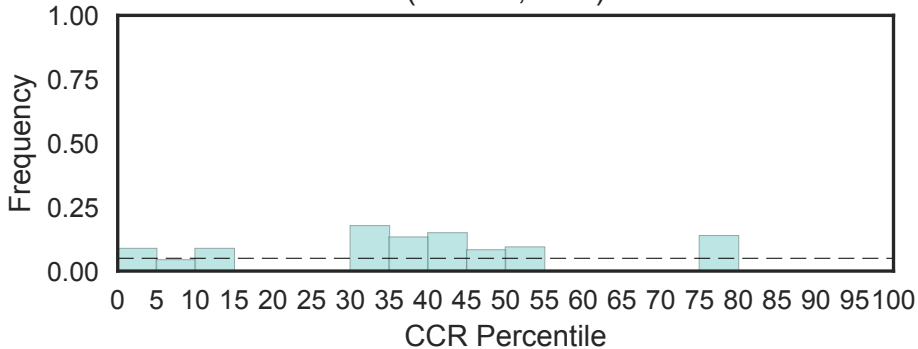

# Leucine carboxyl methyltransferase (LCM, N=2)

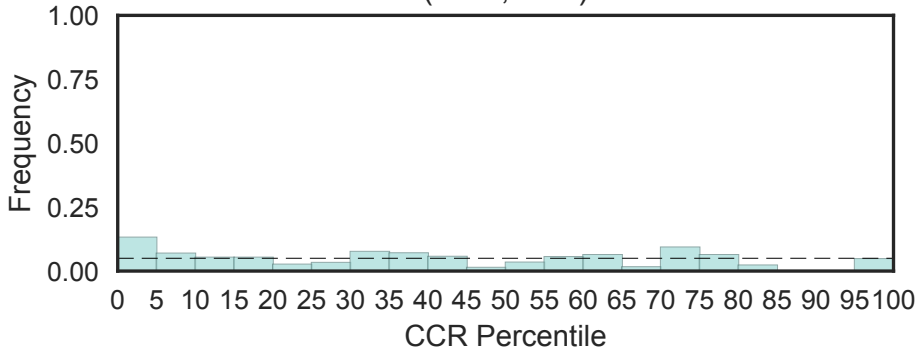

# Liver-expressed antimicrobial peptide 2 precursor (LEAP-2) (LEAP-2, N=1)

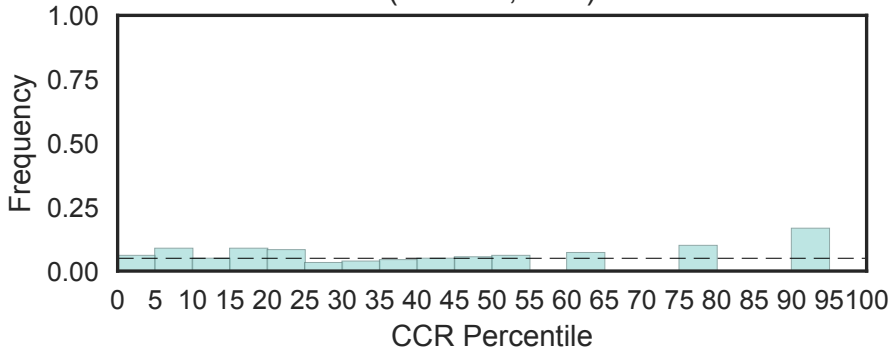

Lens epithelium-derived growth factor (LEDGF)  
(LEDGF, N=2)

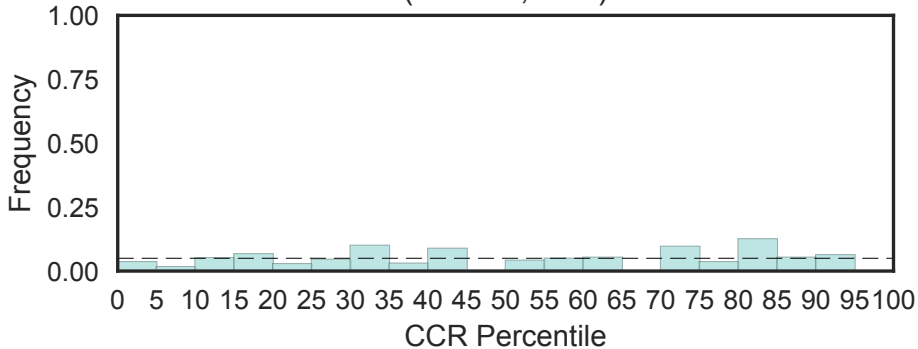

Late cornified envelope-like proline-rich protein 1  
(LELP1, N=1)

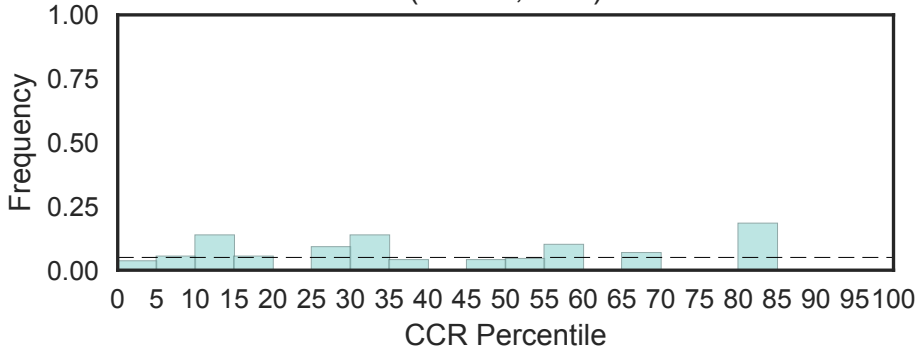



LEM domain  
(LEM, N=6)

Fisher's OR: 0; Bonferroni p-val: 1

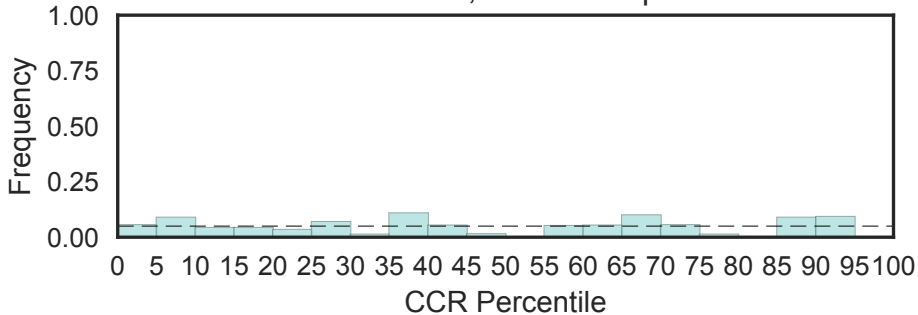

Lens epithelial cell protein LEP503  
(LEP503, N=1)

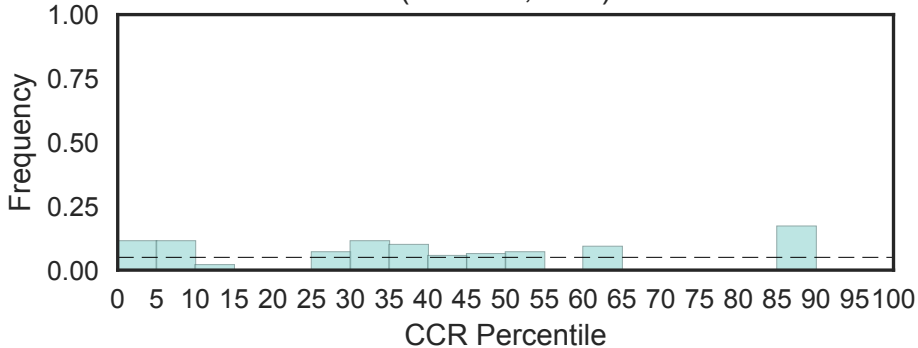

LETM1-like protein  
(LETM1, N=4)

Fisher's OR: 0; Bonferroni p-val: 1

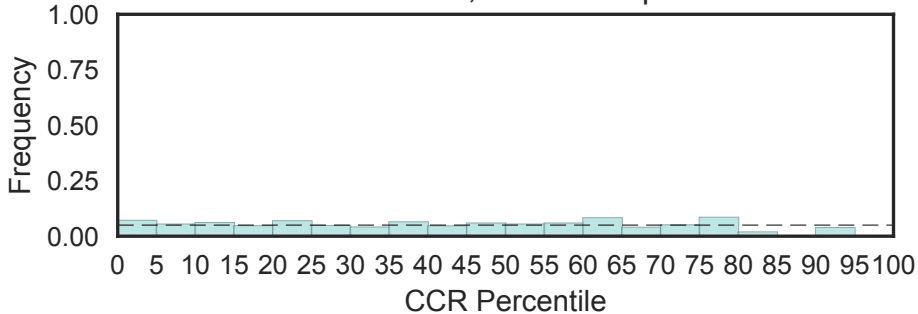

N-terminal domain of lipoyl synthase of Radical\_SAM family  
(LIAS\_N, N=1)

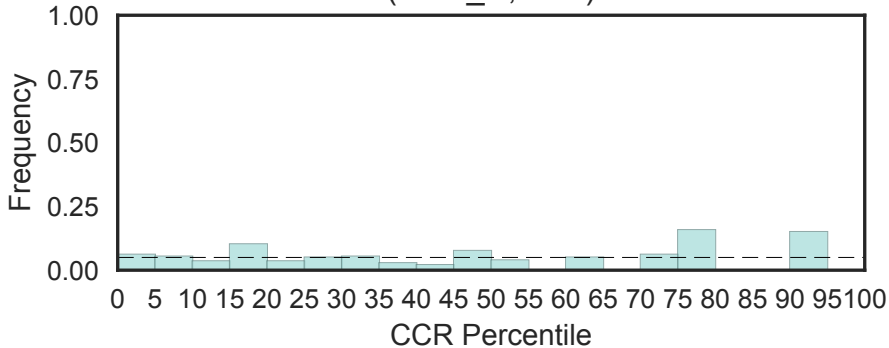

Lipid-droplet associated hydrolase  
(LIDHydrolase, N=1)

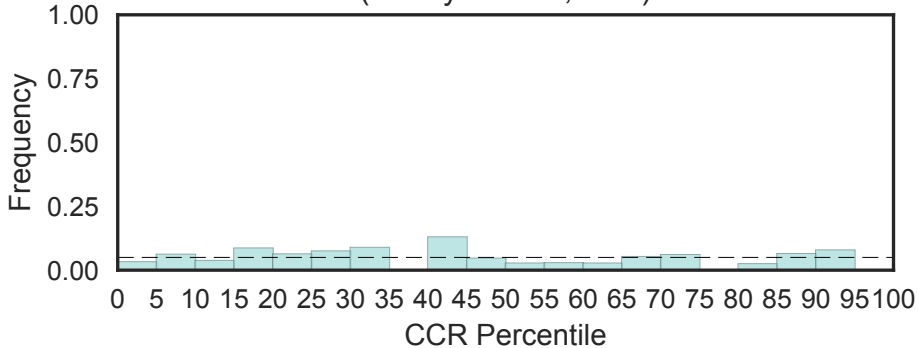

LIF / OSM family  
(LIF\_OSM, N=2)

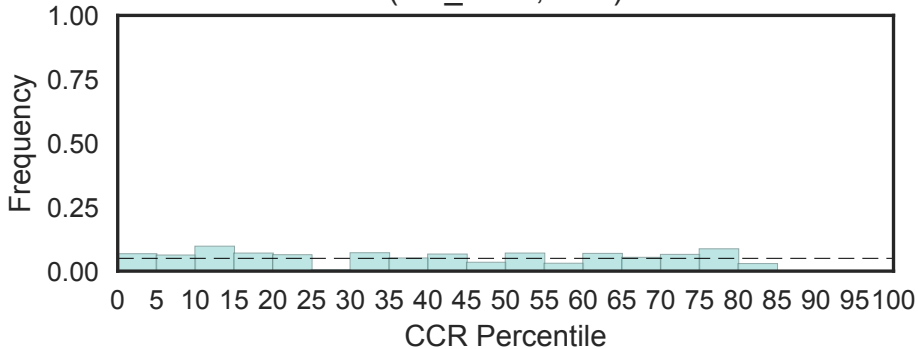

DNA ligase 3 BRCT domain  
(LIG3\_BRCT, N=1)

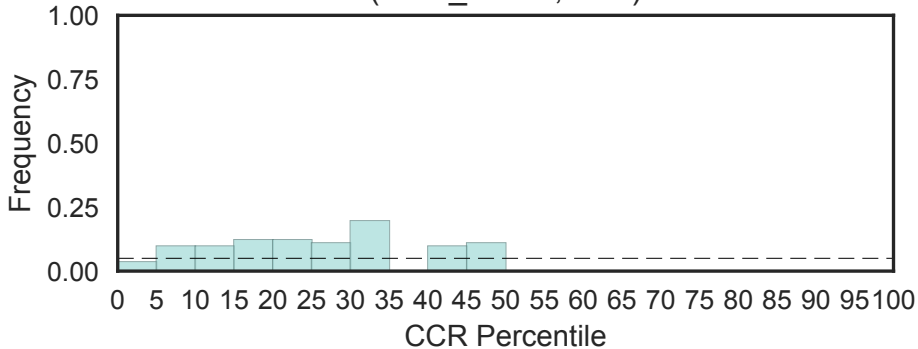

LIM domain  
(LIM, N=159)

Fisher's OR: 0.785; Bonferroni p-val: 1

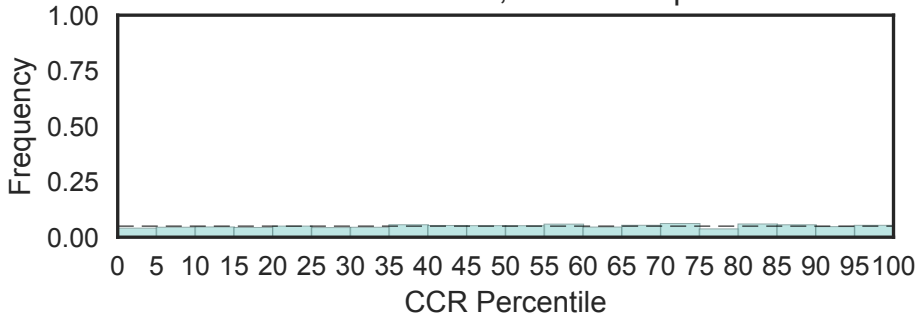



# Lck-interacting transmembrane adapter 1 (LIME1, N=2)

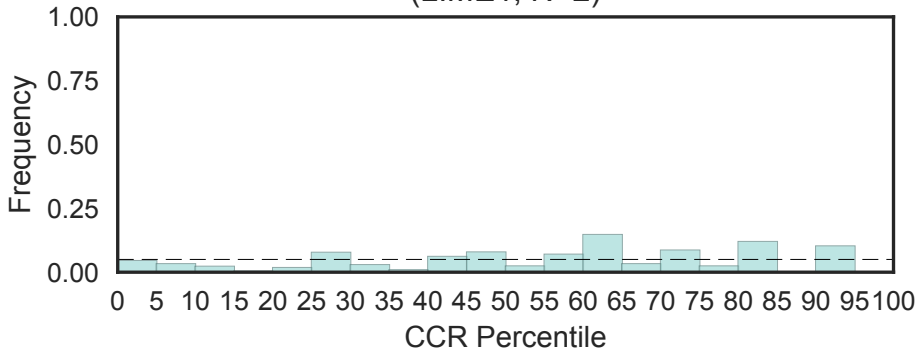

LIM-domain binding protein  
(LIM\_bind, N=3)

Fisher's OR: 3.6; Bonferroni p-val: 1

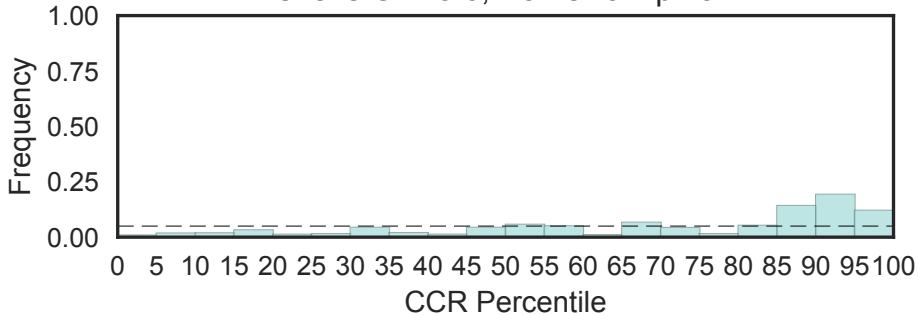

LIN37  
(LIN37, N=1)

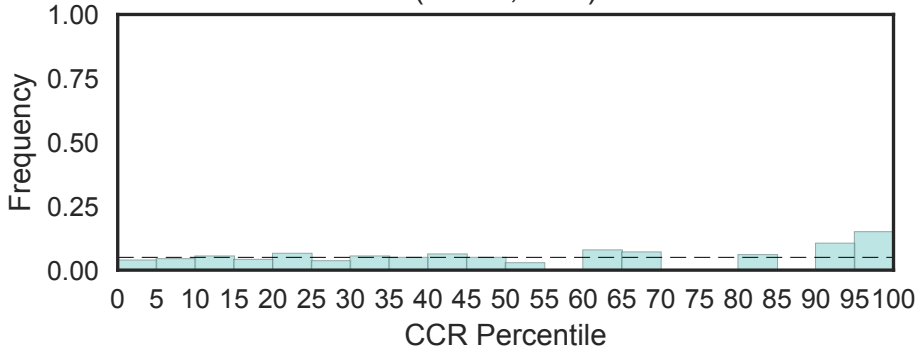

Retinal tissue protein  
(LIN52, N=1)

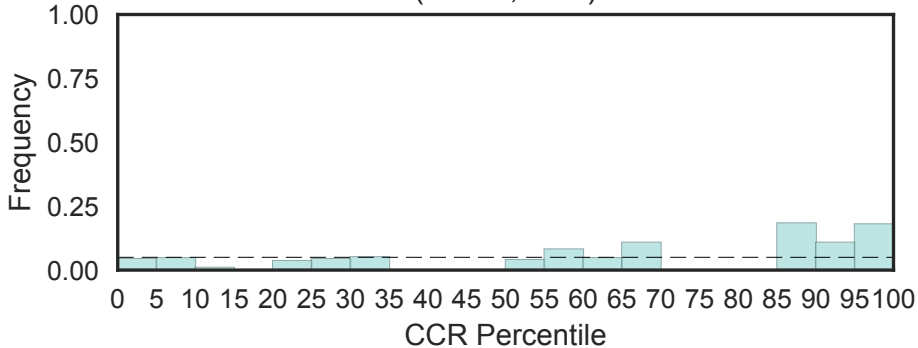

Lines C-terminus  
(LINES\_C, N=1)

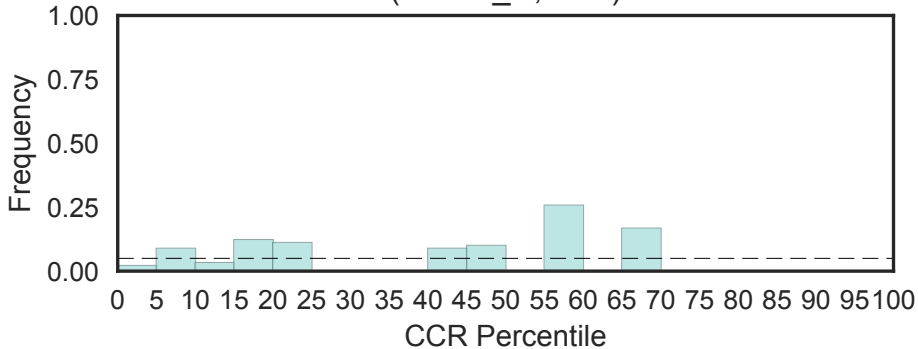

Lines N-terminus  
(LINES\_N, N=2)

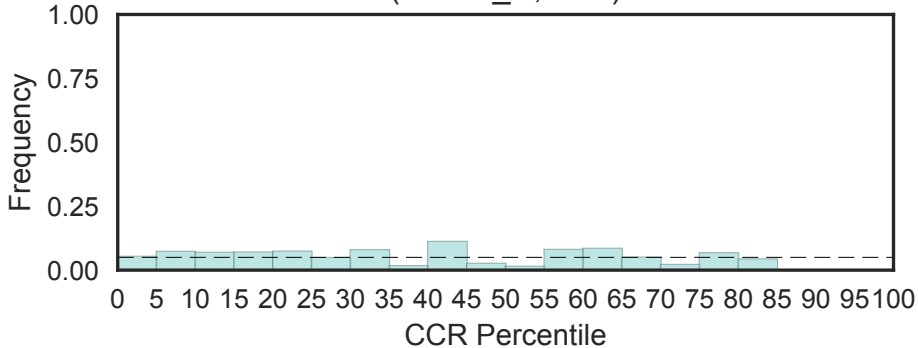

# Secretory lipase (LIP, N=1)

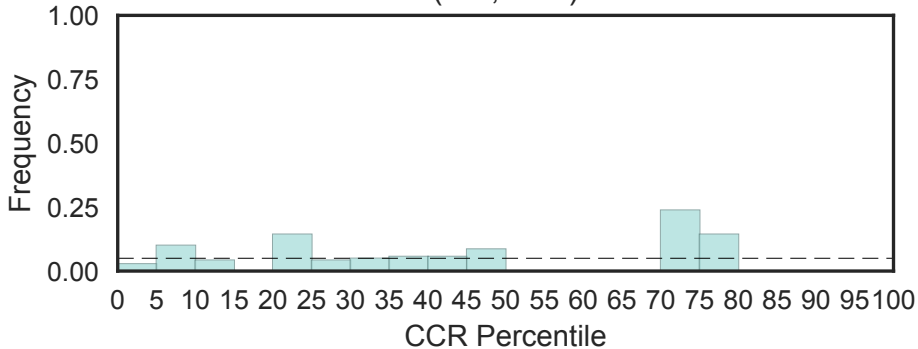

LKB1 serine/threonine kinase interacting protein 1  
(LIP1, N=1)

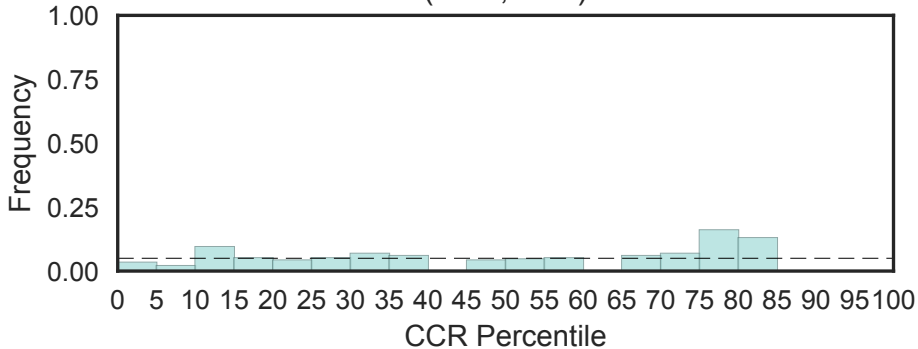



Limb expression 1  
(LIX1, N=3)

Fisher's OR: 0; Bonferroni p-val: 1

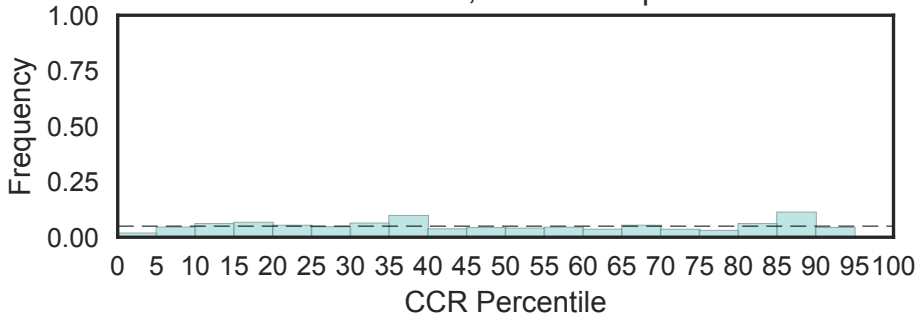

# Normal lung function maintenance, Low in Lung Cancer 1 protein (LLC1, N=1)

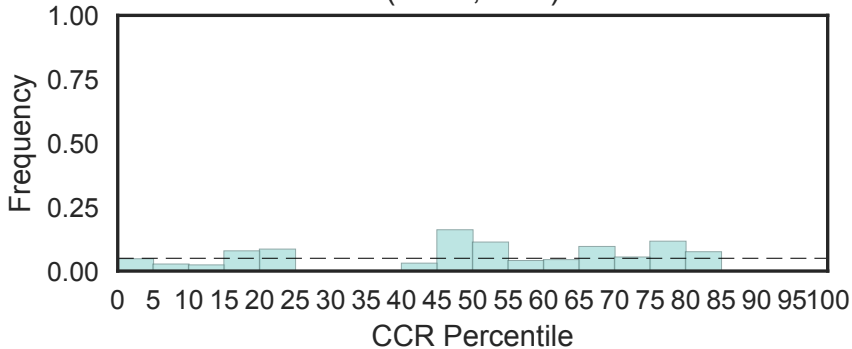

LLGL2  
(LLGL, N=4)

Fisher's OR: 0.819; Bonferroni p-val: 1

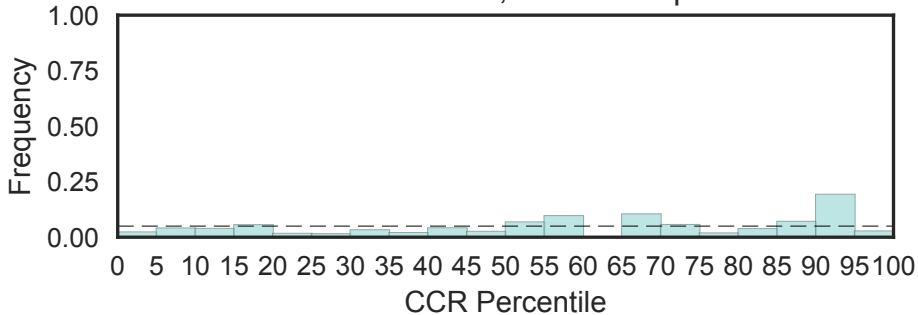

LMBR1-like membrane protein  
(LMBR1, N=6)

Fisher's OR: 0.668; Bonferroni p-val: 1

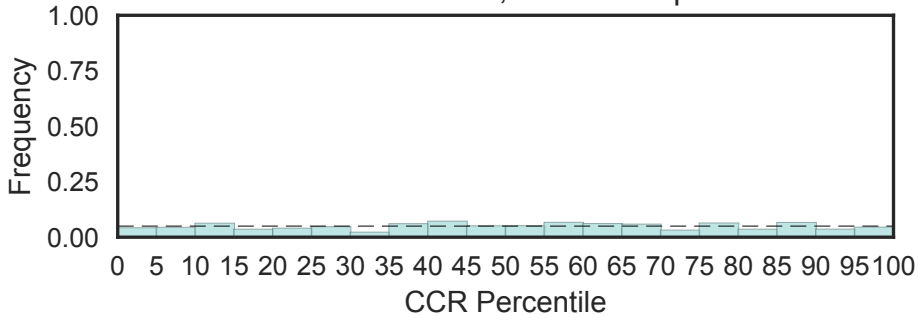

Lipase maturation factor  
(LMF1, N=4)

Fisher's OR: 0; Bonferroni p-val: 1

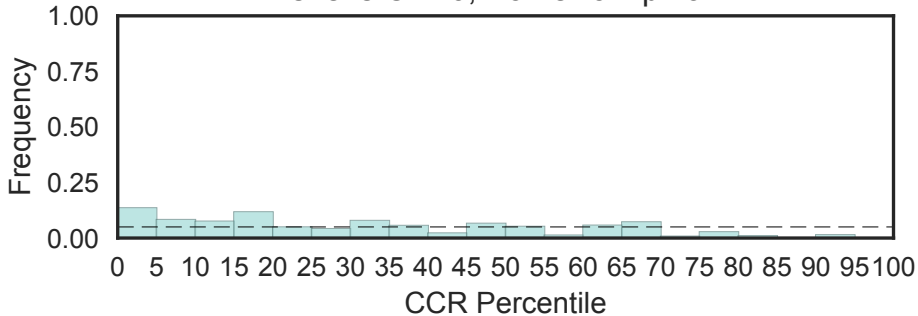

LMSTEN motif  
(LMSTEN, N=2)

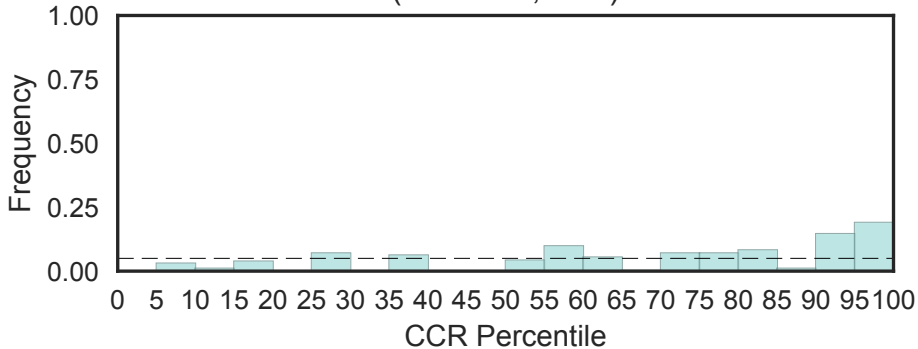

# Low molecular weight phosphotyrosine protein phosphatase (LMWPC, N=1)

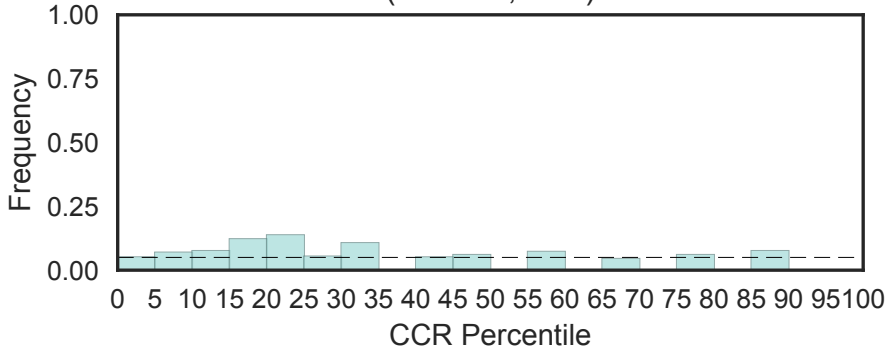

Leukemia NUP98 fusion partner 1  
(LNP1, N=1)

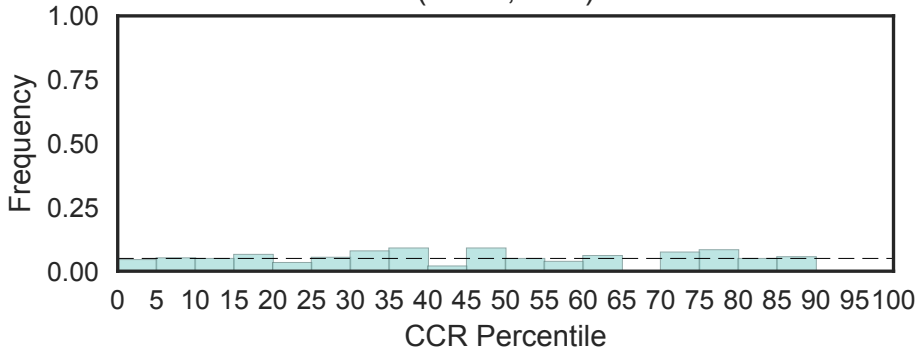



LNS2 (Lipin/Ned1/Smp2)  
(LNS2, N=3)

Fisher's OR: 0; Bonferroni p-val: 1

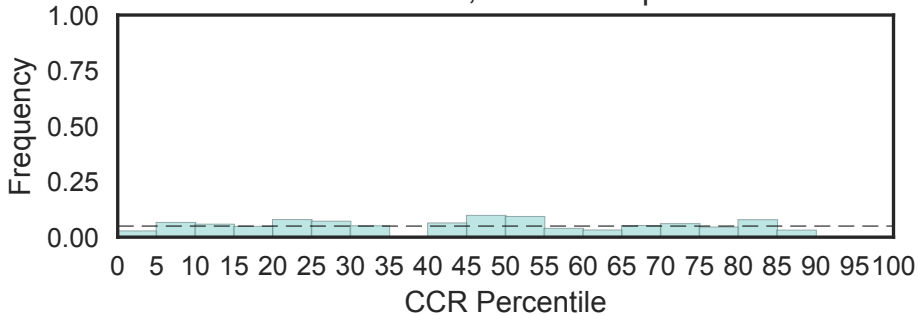

Tumour suppressor protein  
(LOH1CR12, N=1)

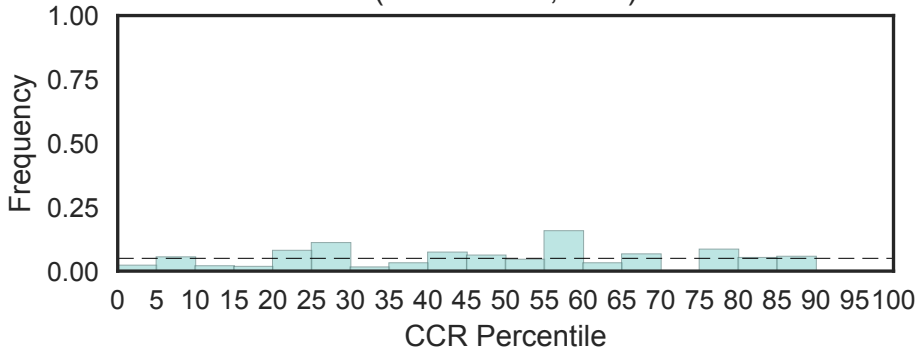

ATP-dependent protease La (LON) substrate-binding domain  
(LON\_substr\_bdg, N=5)

Fisher's OR: 0.612; Bonferroni p-val: 1

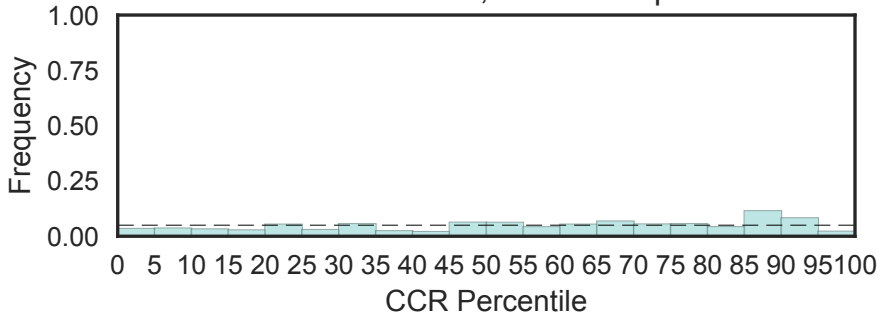

Lecithin retinol acyltransferase  
(LRAT, N=8)

Fisher's OR: 0.303; Bonferroni p-val: 1

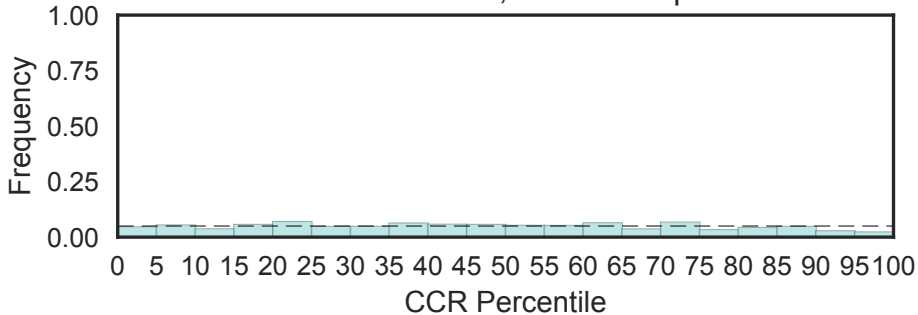

# Ligand-dependent nuclear receptor-interacting factor 1 (LRIF1, N=1)

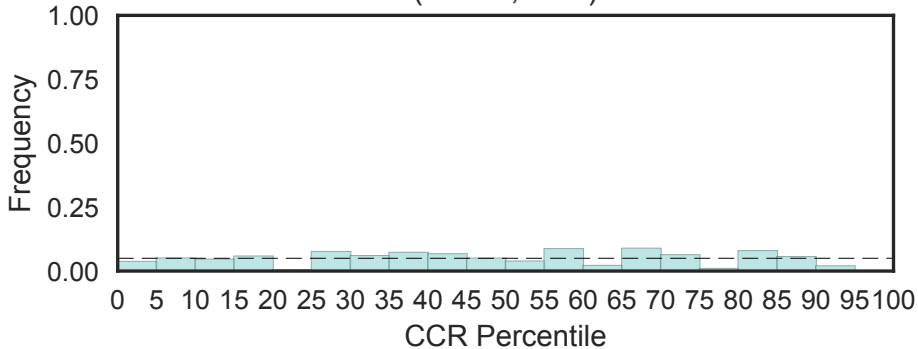

Leucine-rich repeat family 19 TM domain  
(LRR19-TM, N=2)

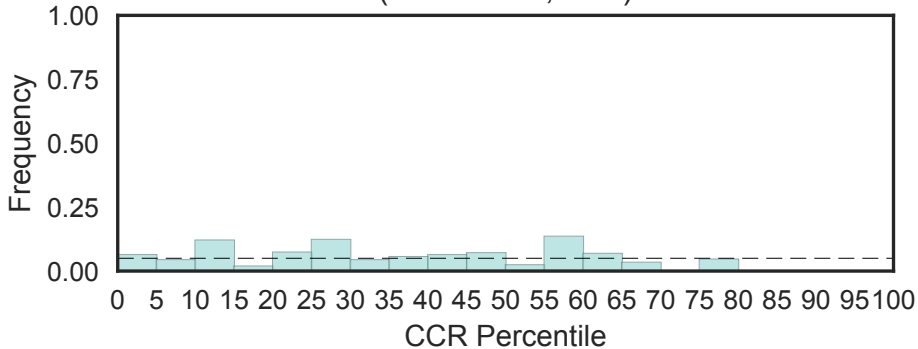

Leucine rich repeat C-terminal domain  
(LRRCT, N=54)

Fisher's OR: 0.257; Bonferroni p-val: 1

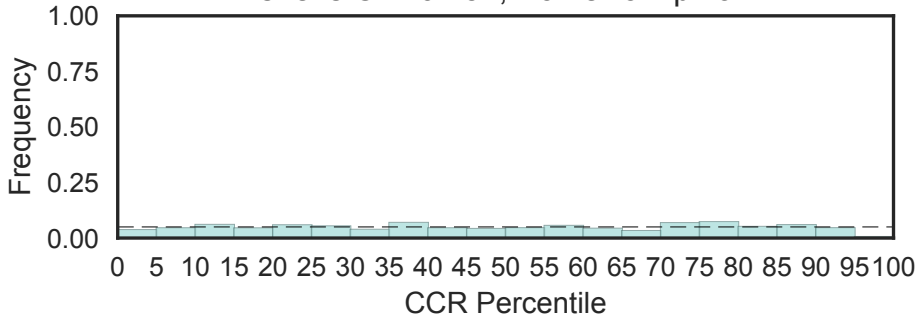

LRRFIP family  
(LRRFIP, N=6)

Fisher's OR: 0; Bonferroni p-val: 1

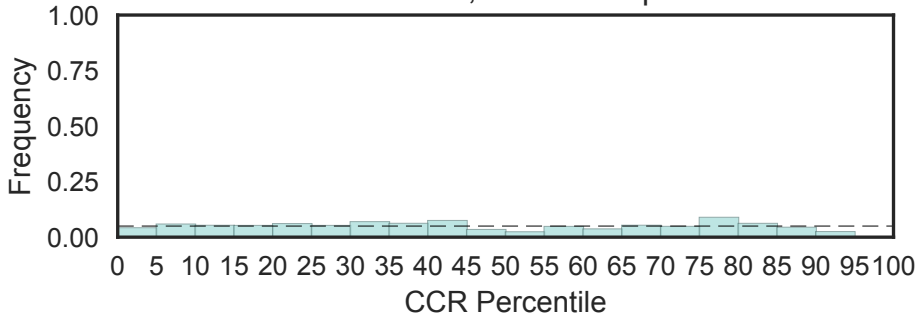



Leucine rich repeat N-terminal domain  
(LRRNT, N=37)

Fisher's OR: 0.218; Bonferroni p-val: 1

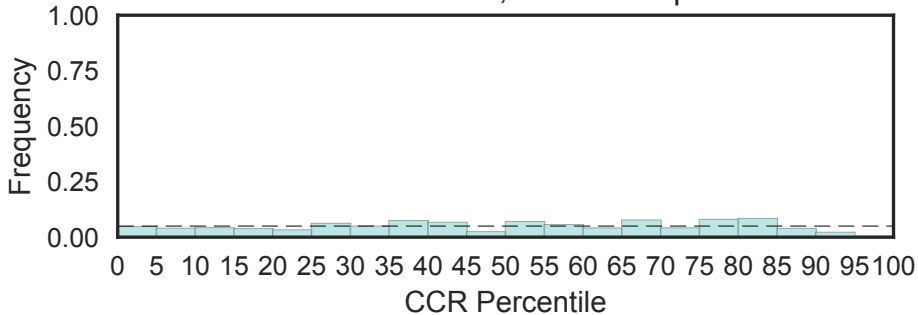

Leucine Rich Repeat  
(LRR\_1, N=125)

Fisher's OR: 2.07; Bonferroni p-val: 1

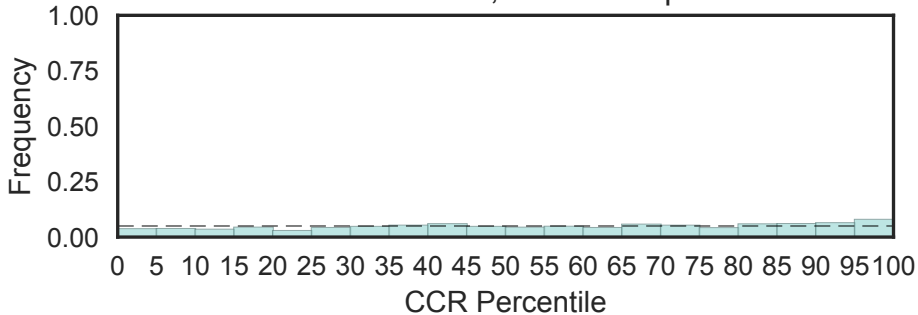

# Leucine Rich Repeat (LRR\_2, N=1)

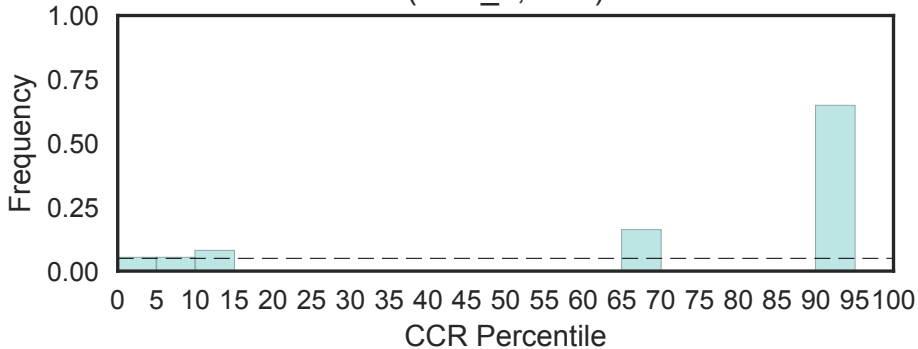

Leucine Rich repeats (2 copies)  
(LRR\_4, N=71)

Fisher's OR: 1.27; Bonferroni p-val: 1

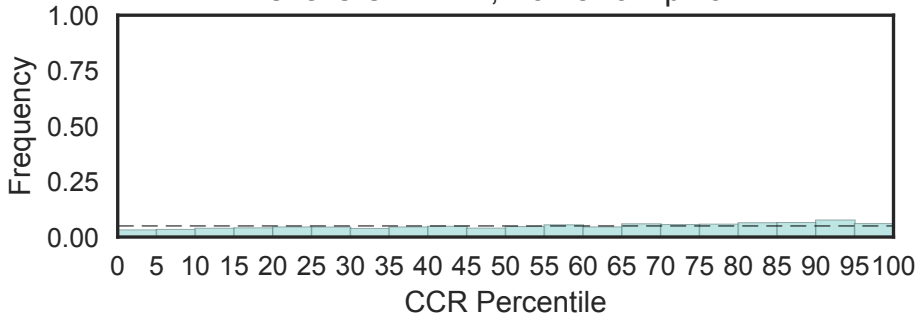

Leucine rich repeats (6 copies)

(LRR\_5, N=169)

Fisher's OR: 0.979; Bonferroni p-val: 1

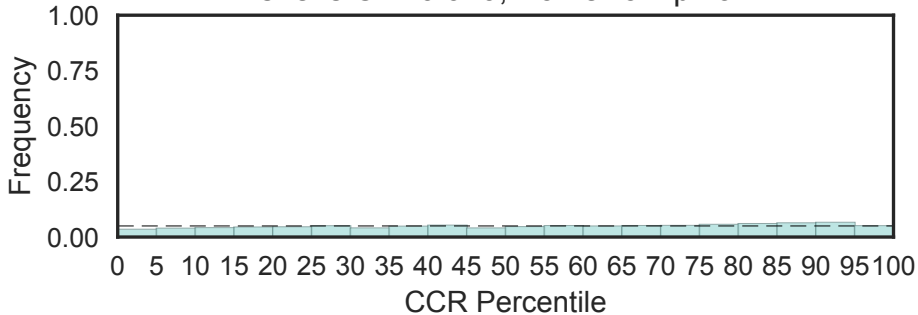

Leucine Rich repeat  
(LRR\_6, N=266)

Fisher's OR: 1.35; Bonferroni p-val: 1

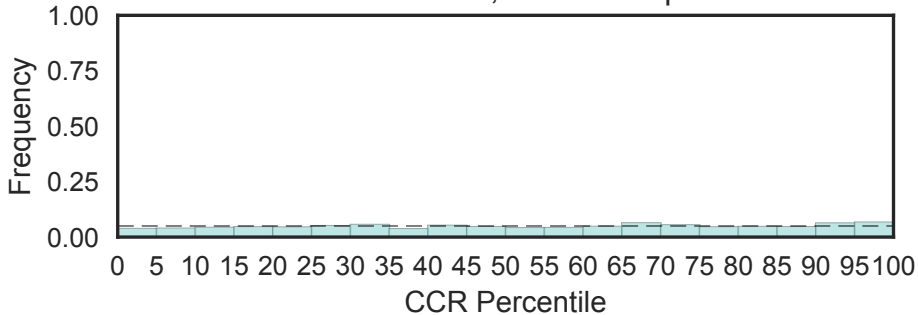

Leucine rich repeat  
(LRR\_8, N=415)

Fisher's OR: 0.817; Bonferroni p-val: 1

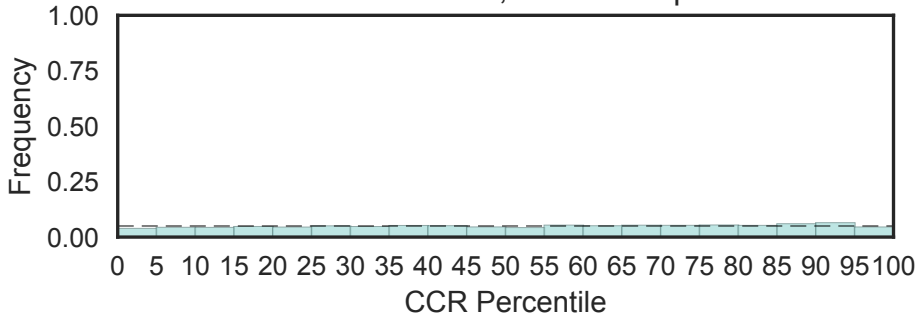

Leucine-rich repeat  
(LRR\_9, N=25)

Fisher's OR: 1.21; Bonferroni p-val: 1

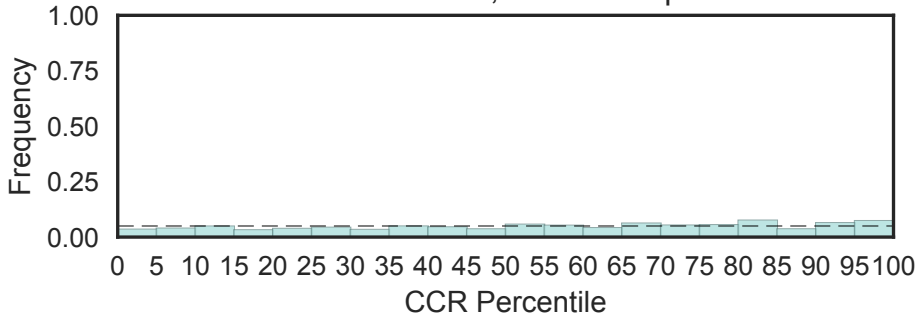



LSM domain  
(LSM, N=18)

Fisher's OR: 4.8; Bonferroni p-val: 0.0414

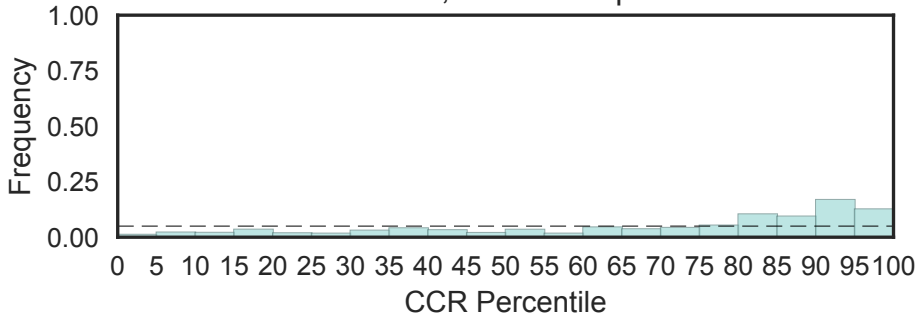

Scd6-like Sm domain  
(LSM14, N=3)

Fisher's OR: 2.16; Bonferroni p-val: 1

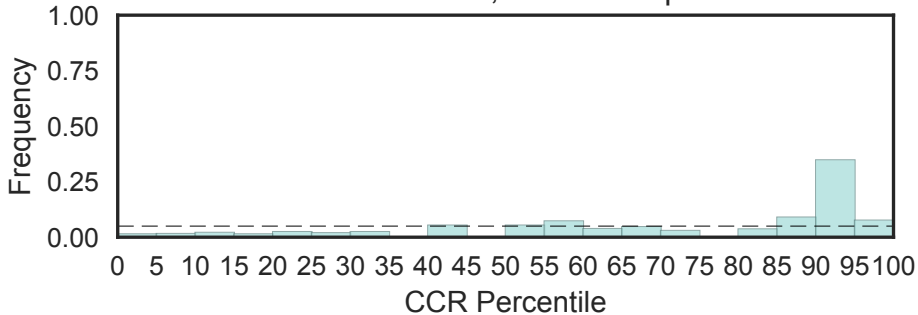

LSM-interacting associated unstructured  
(LSM\_int\_assoc, N=1)

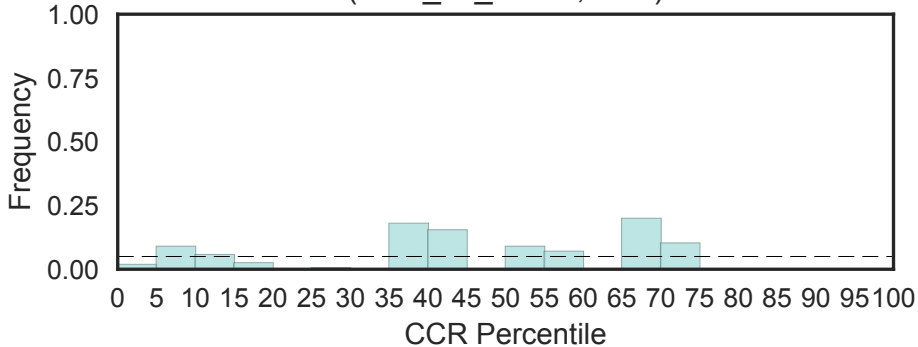

Coagulation Factor V LSPD Repeat  
(LSPR, N=16)

Fisher's OR: 2.51; Bonferroni p-val: 1

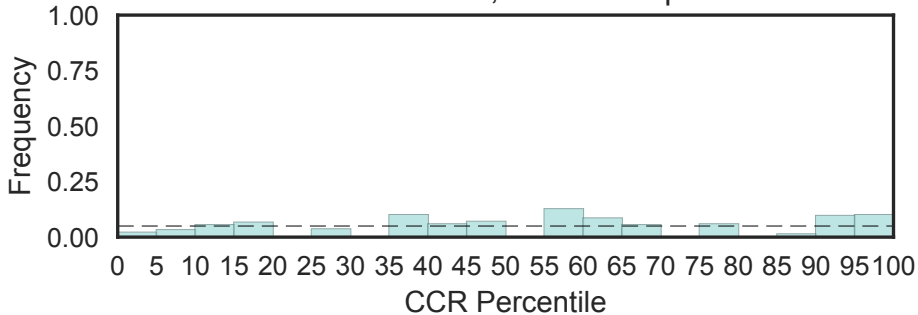

Lipolysis stimulated receptor (LSR)  
(LSR, N=3)

Fisher's OR: 0; Bonferroni p-val: 1

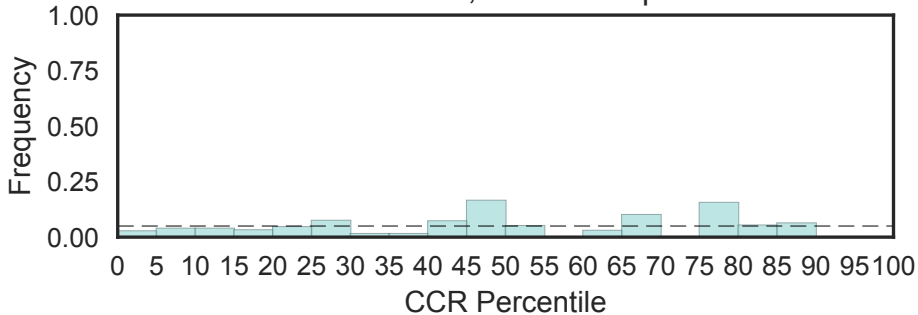

Lamin Tail Domain  
(LTD, N=5)

Fisher's OR: 0; Bonferroni p-val: 1

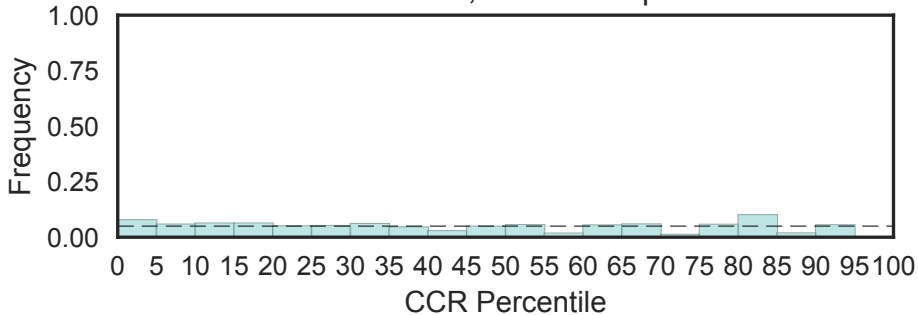

# Low temperature viability protein (LTV, N=1)

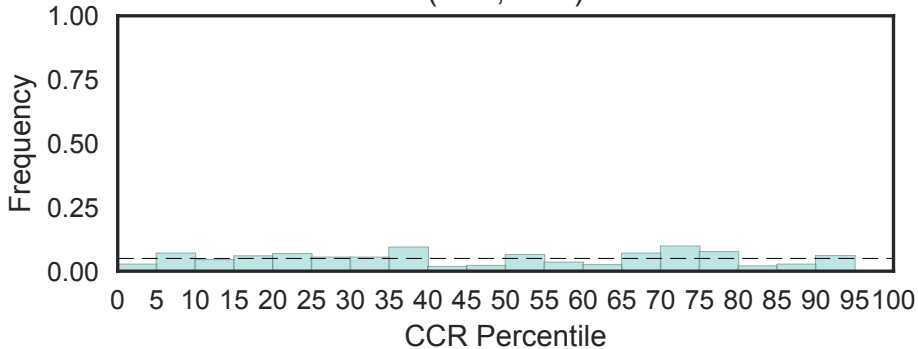

LUC7 N\_terminus  
(LUC7, N=4)

Fisher's OR: 7.55; Bonferroni p-val: 0.00108

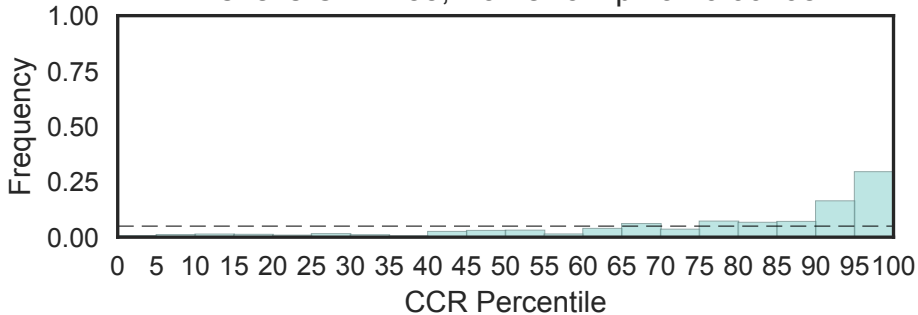



Leucine rich adaptor protein  
(LURAP, N=4)

Fisher's OR: 0; Bonferroni p-val: 1

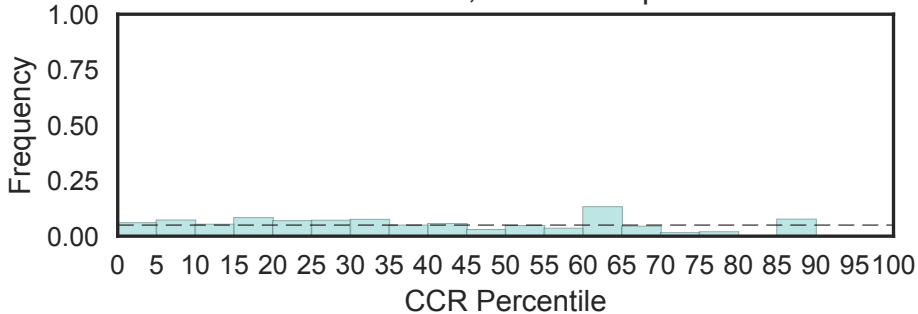

Lysine-rich CEACAM1 co-isolated protein family  
(LYRIC, N=1)

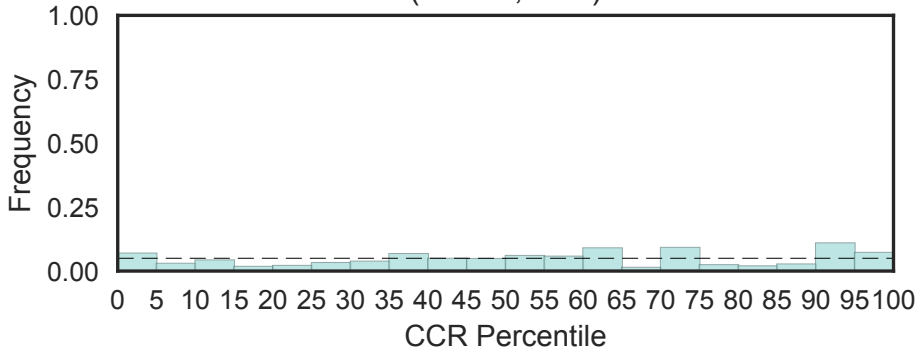

Lipoma HMGIC fusion partner-like protein  
(L\_HMGIC\_fpl, N=6)

Fisher's OR: 1.38; Bonferroni p-val: 1

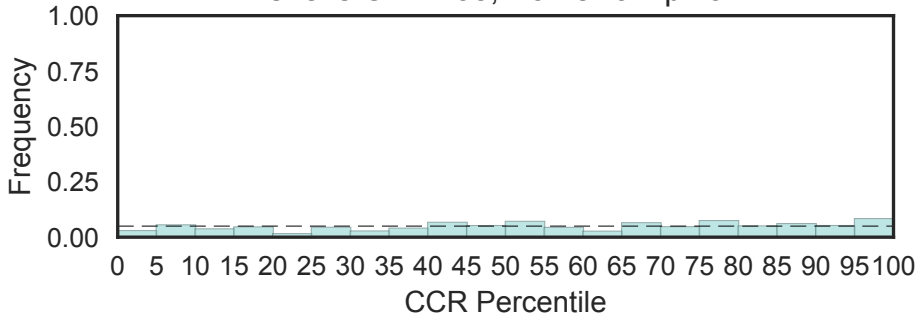

La domain  
(La, N=7)

Fisher's OR: 1.8; Bonferroni p-val: 1

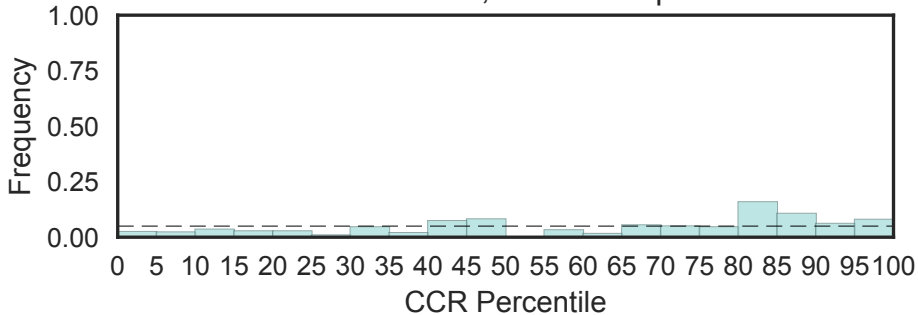

Metallo-beta-lactamase superfamily  
(Lactamase\_B, N=13)  
Fisher's OR: 0.461; Bonferroni p-val: 1

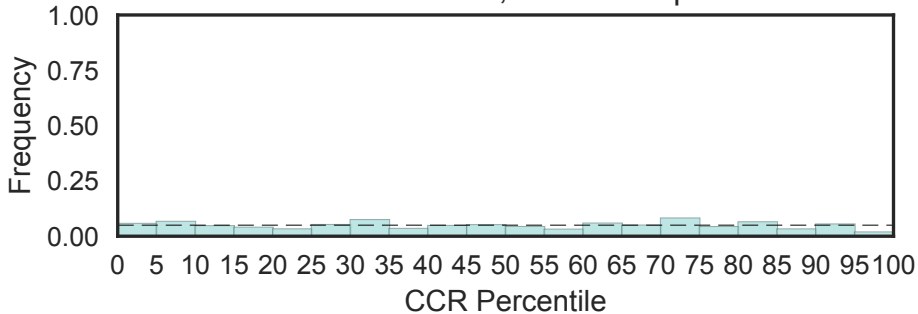

Beta-lactamase superfamily domain  
(Lactamase\_B\_2, N=6)  
Fisher's OR: 0.291; Bonferroni p-val: 1

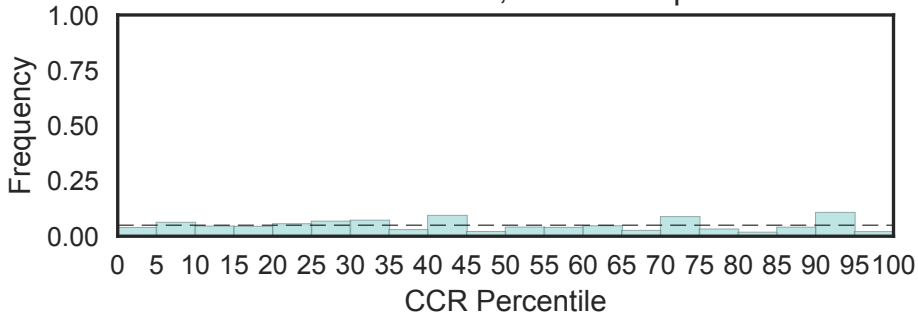

Beta-lactamase superfamily domain  
(Lactamase\_B\_3, N=2)

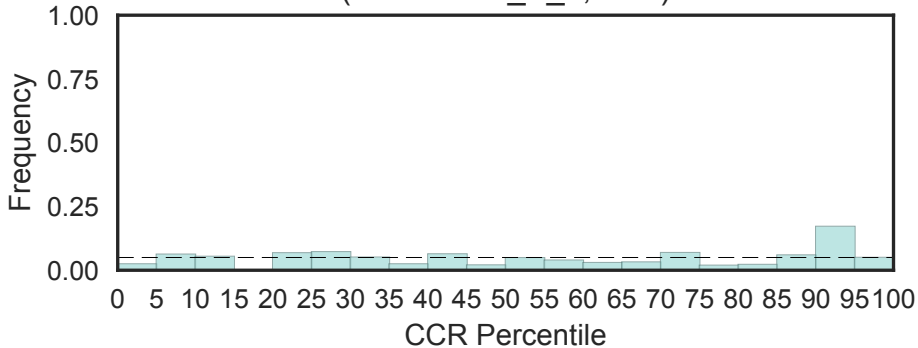

tRNase Z endonuclease  
(Lactamase\_B\_4, N=2)

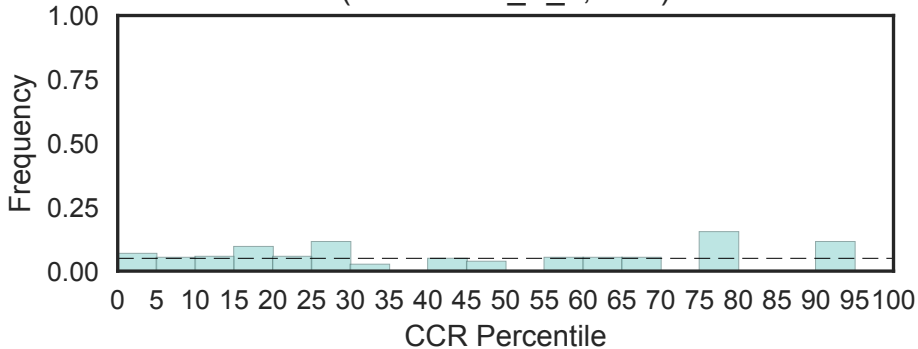



Metallo-beta-lactamase superfamily domain  
(Lactamase\_B\_6, N=4)

Fisher's OR: 2.19; Bonferroni p-val: 1

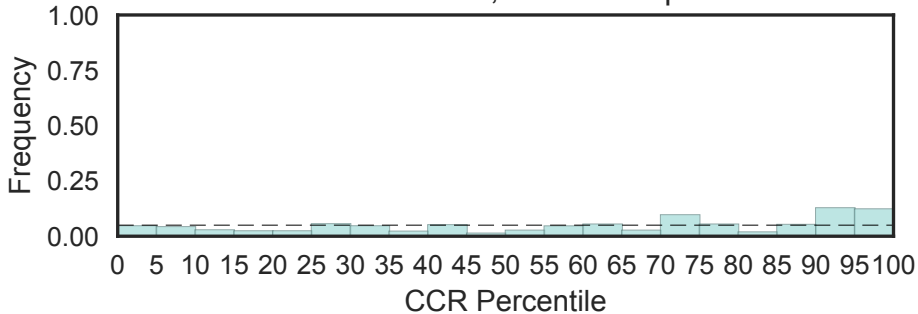

# Laminin B (Domain IV)

(Laminin\_B, N=12)

Fisher's OR: 0.164; Bonferroni p-val: 1

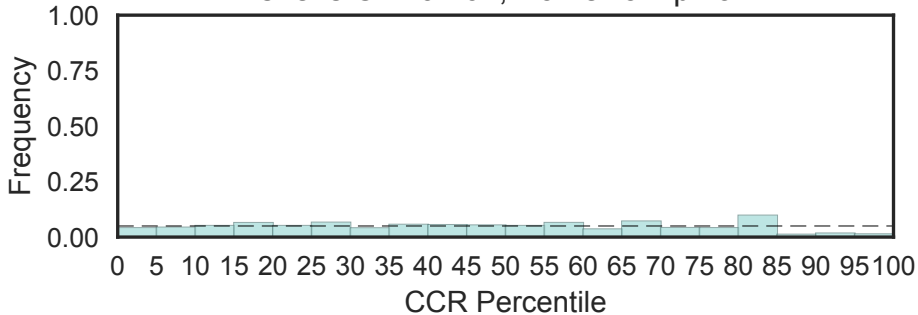

Laminin EGF domain  
(Laminin\_EGF, N=224)

Fisher's OR: 0.227; Bonferroni p-val: 7.58e-05

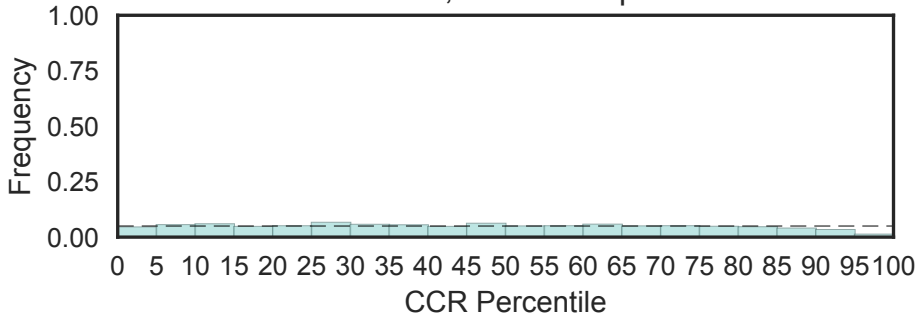

Laminin G domain  
(Laminin\_G\_1, N=104)

Fisher's OR: 0.735; Bonferroni p-val: 1

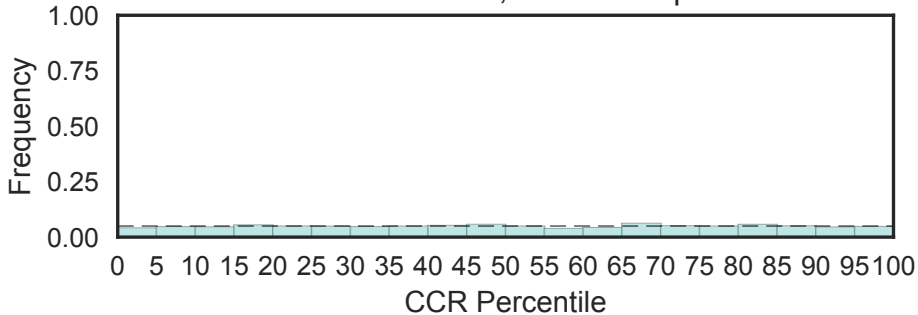

Laminin G domain  
(Laminin\_G\_2, N=112)  
Fisher's OR: 0.723; Bonferroni p-val: 1

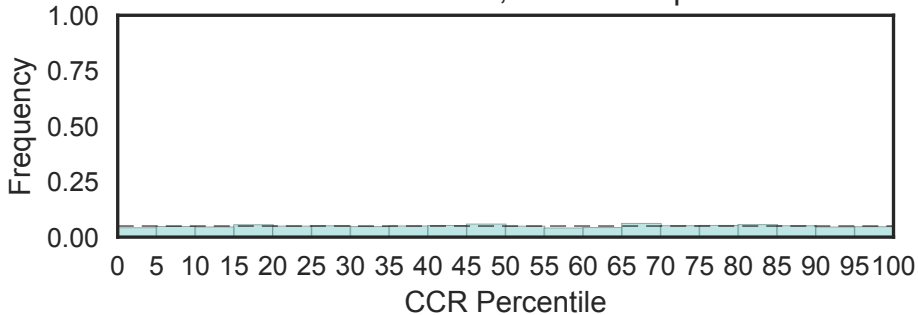

Concanavalin A-like lectin/glucanases superfamily  
(Laminin\_G\_3, N=20)

Fisher's OR: 0.313; Bonferroni p-val: 1

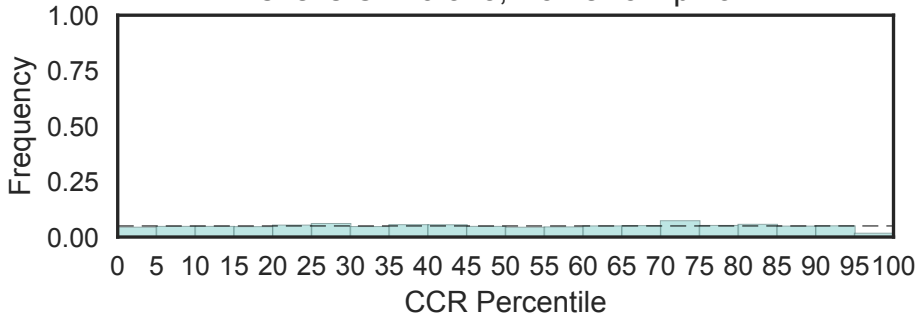

Laminin Domain I  
(Laminin\_I, N=5)

Fisher's OR: 0.194; Bonferroni p-val: 1

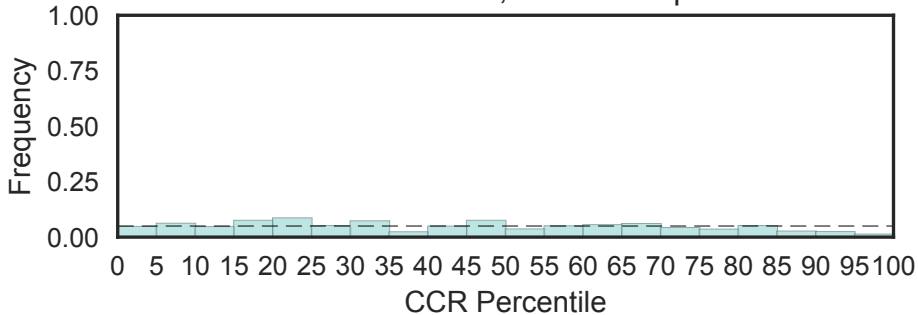

# Laminin Domain II

(Laminin\_II, N=5)

Fisher's OR: 0; Bonferroni p-val: 1

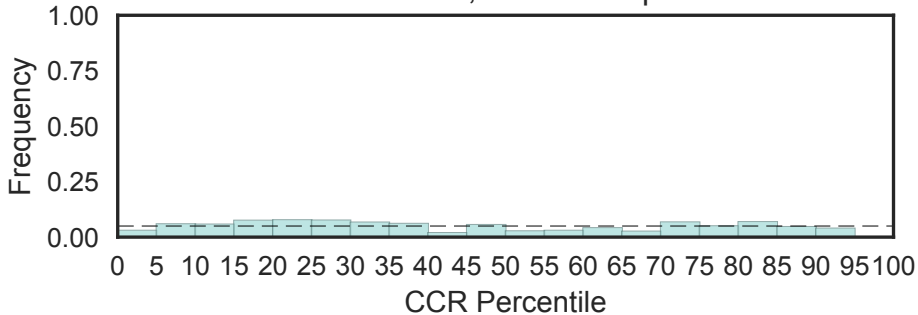



# Laminin N-terminal (Domain VI)

(Laminin\_N, N=16)

Fisher's OR: 0.889; Bonferroni p-val: 1

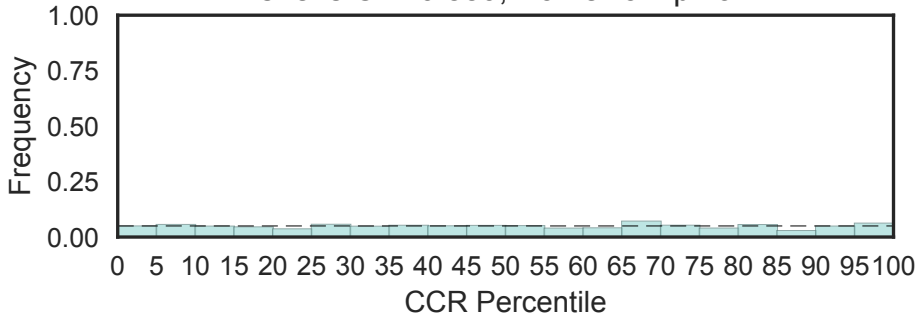

Lysosome-associated membrane glycoprotein (Lamp)  
(Lamp, N=4)

Fisher's OR: 0.225; Bonferroni p-val: 1

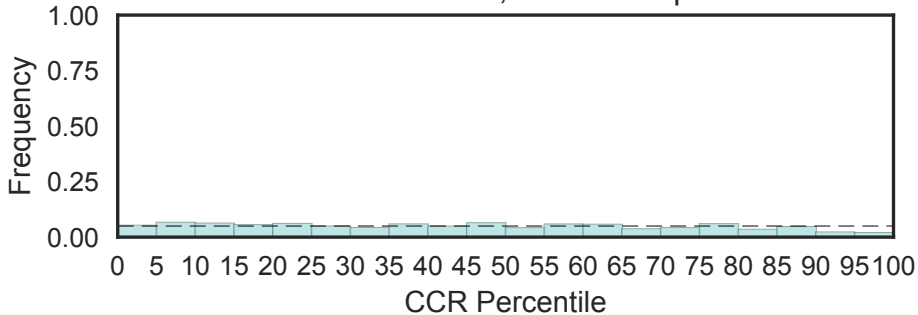

# Learning-associated protein (Laps, N=1)

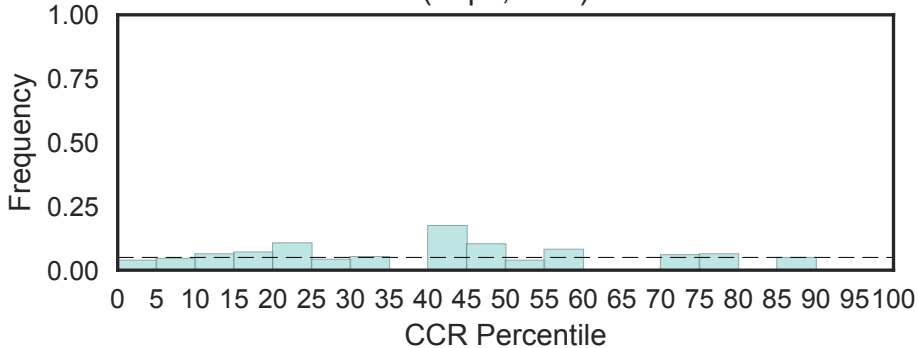

Latexin  
(Latexin, N=2)

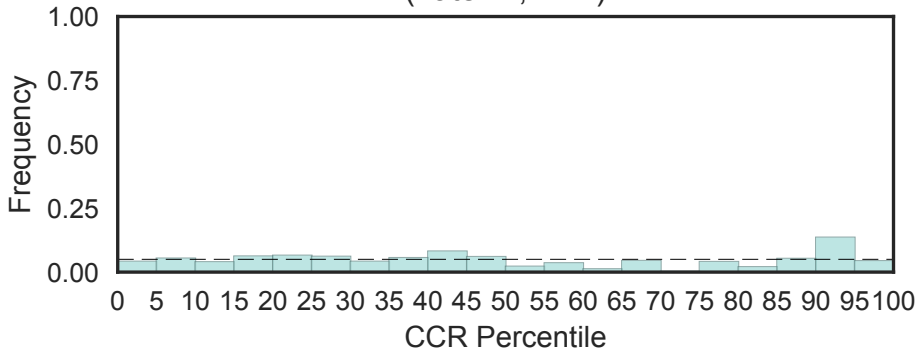

Latrophilin Cytoplasmic C-terminal region  
(Latrophilin, N=4)

Fisher's OR: 0.699; Bonferroni p-val: 1

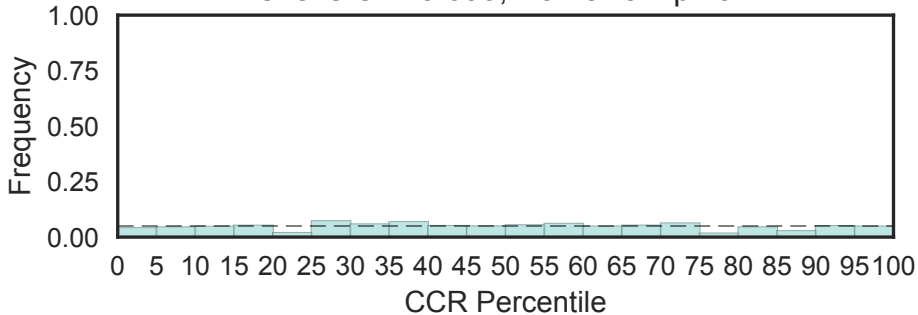

Cardiac transcription factor regulator, Developmental protein  
(Lbh, N=2)

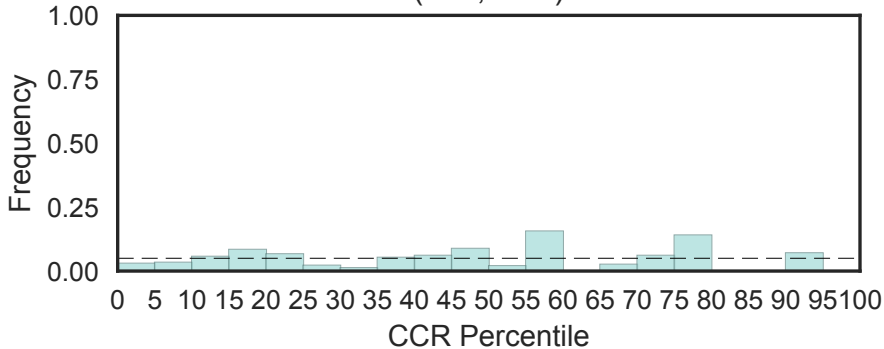

lactate/malate dehydrogenase, alpha/beta C-terminal domain  
(Ldh\_1\_C, N=8)

Fisher's OR: 0; Bonferroni p-val: 1

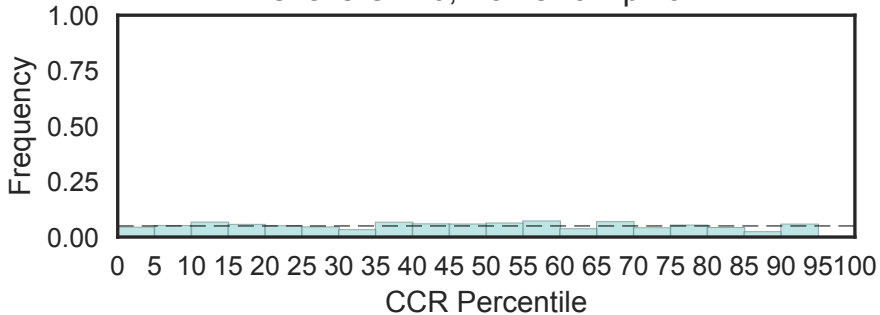

lactate/malate dehydrogenase, NAD binding domain  
(Ldh\_1\_N, N=9)

Fisher's OR: 0; Bonferroni p-val: 1

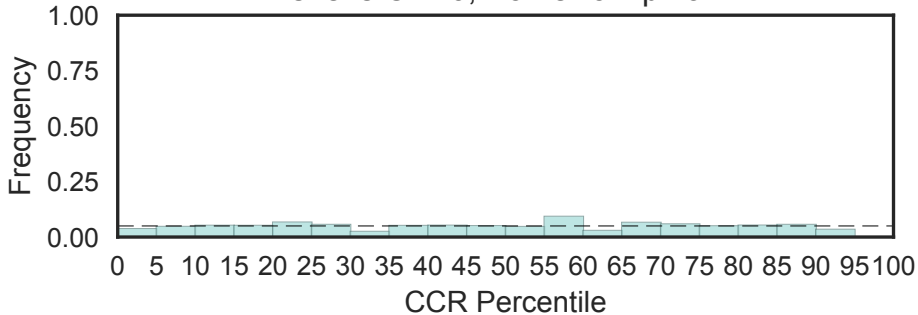



Low-density lipoprotein receptor domain class A  
(Ldl\_recept\_a, N=196)

Fisher's OR: 0.473; Bonferroni p-val: 1

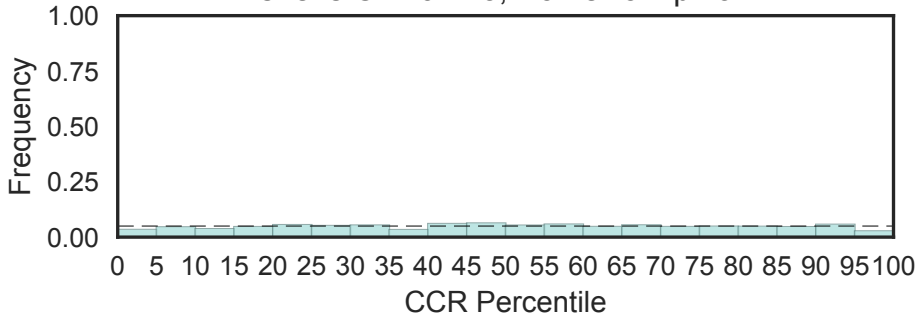

Low-density lipoprotein receptor repeat class B  
(Ldl\_recept\_b, N=113)

Fisher's OR: 0.686; Bonferroni p-val: 1

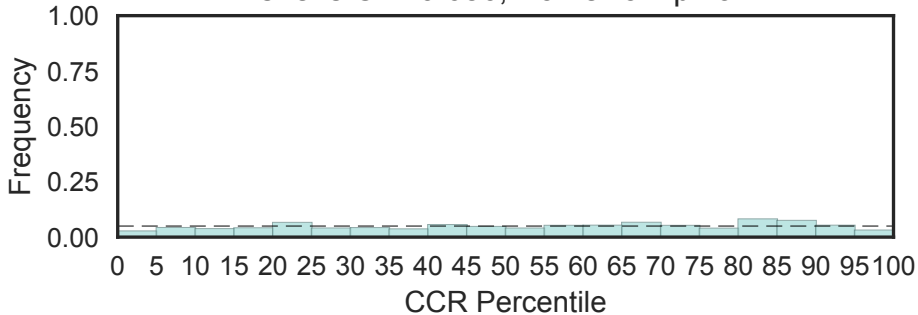

# Ciliary protein causing Leber congenital amaurosis disease (Lebercilin, N=2)

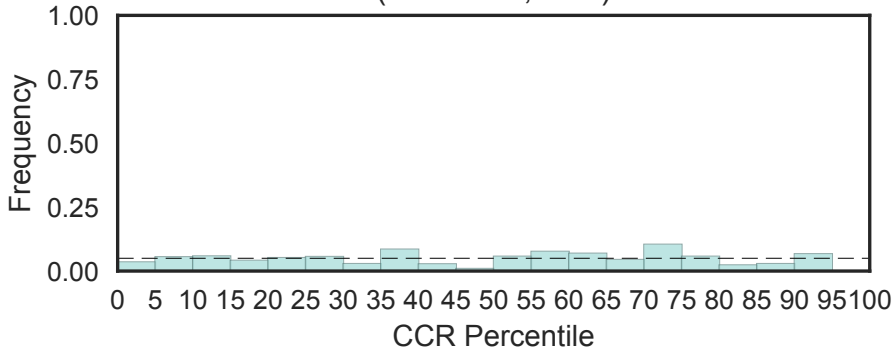

Lectin C-type domain  
(Lectin\_C, N=137)

Fisher's OR: 0.332; Bonferroni p-val: 0.00233

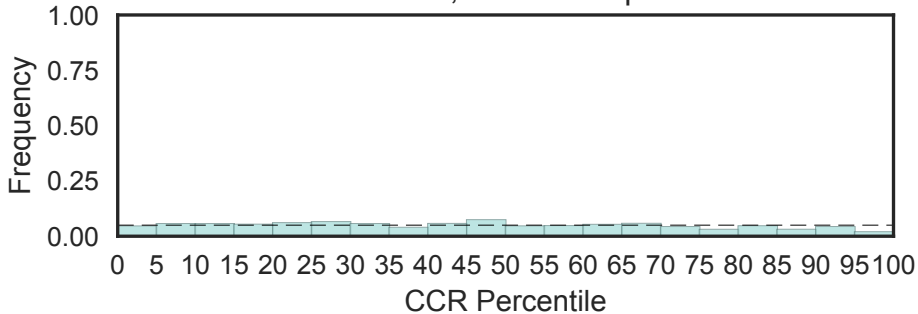

Hepatic lectin, N-terminal domain  
(Lectin\_N, N=3)  
Fisher's OR: 0.6111; Bonferroni p-val: 1

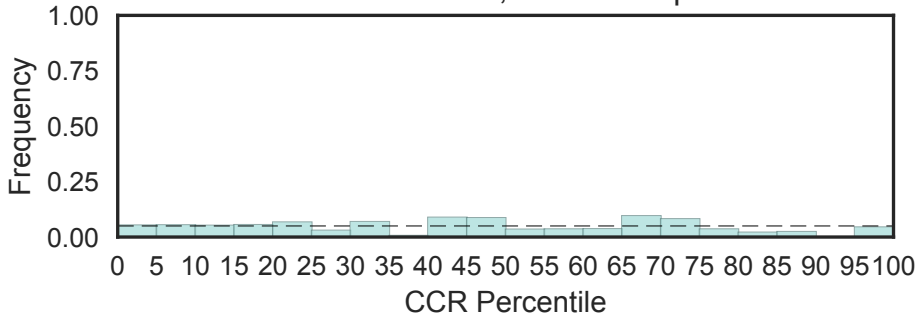

Legume-like lectin family  
(Lectin\_leg-like, N=4)

Fisher's OR: 0.575; Bonferroni p-val: 1

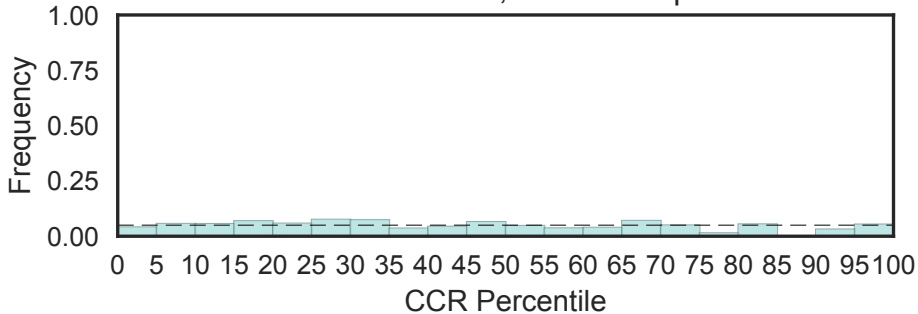

# Leg1 (Leg1, N=1)

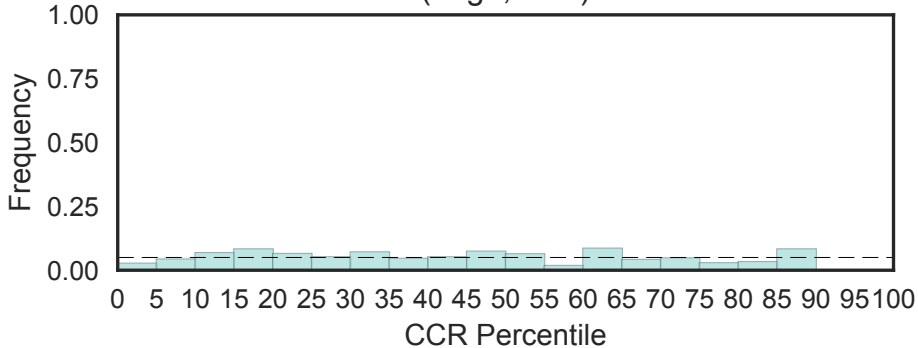

Leo1-like protein  
(Leo1, N=1)

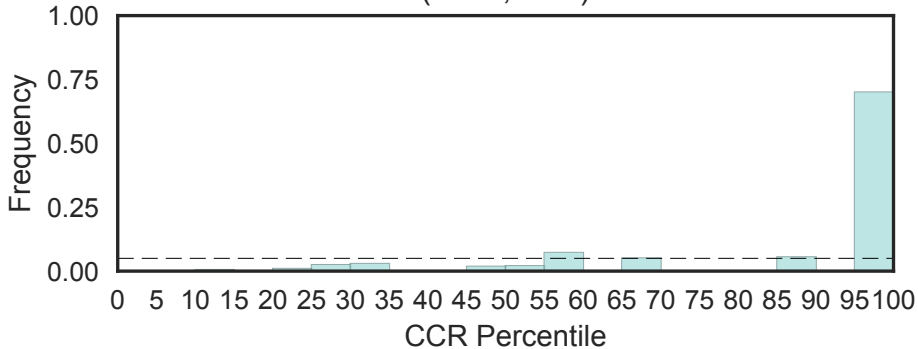



GTP-binding protein LepA C-terminus  
(LepA\_C, N=1)

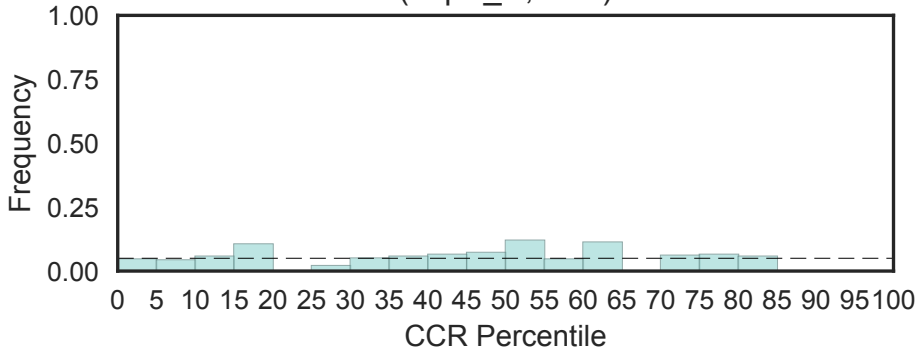

Ig-like C2-type domain  
(Lep\_receptor\_Ig, N=4)  
Fisher's OR: 0; Bonferroni p-val: 1

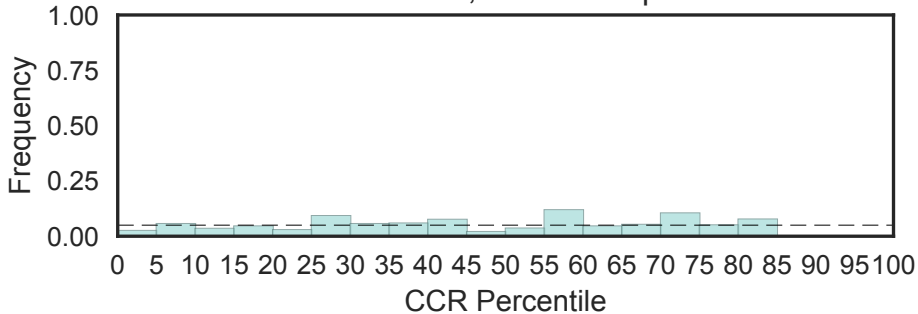

# Leptin (Leptin, N=1)

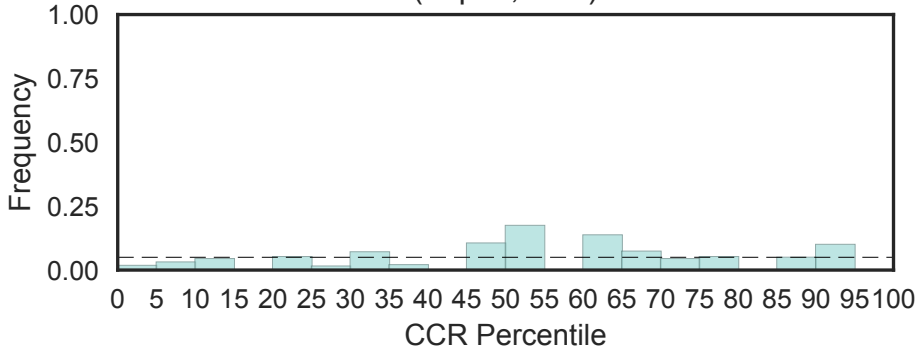

Leucine zipper  
(Leu\_zip, N=1)

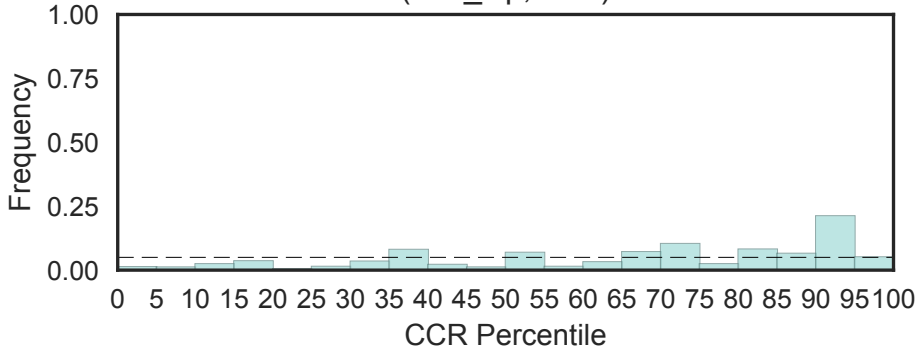

Leukotriene A4 hydrolase, C-terminal  
(Leuk-A4-hydro\_C, N=4)  
Fisher's OR: 0.591; Bonferroni p-val: 1

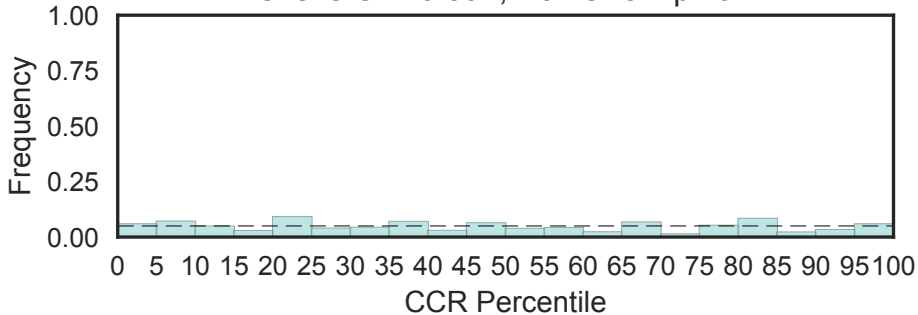

Transcriptional regulatory protein LGE1  
(Lge1, N=1)

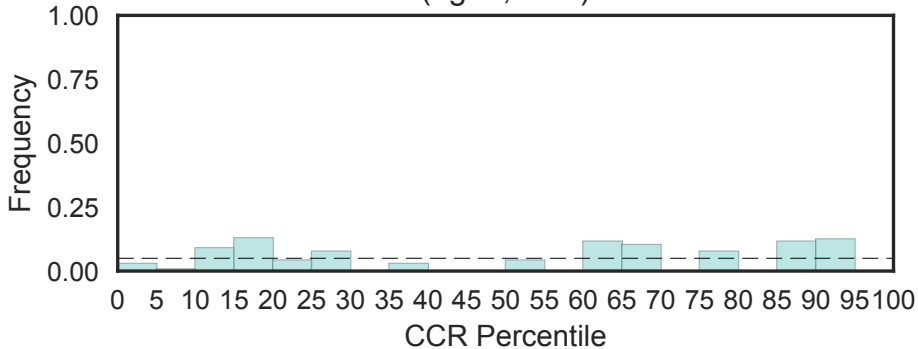

Lethal giant larvae(Lgl) like, C-terminal  
(Lgl\_C, N=2)

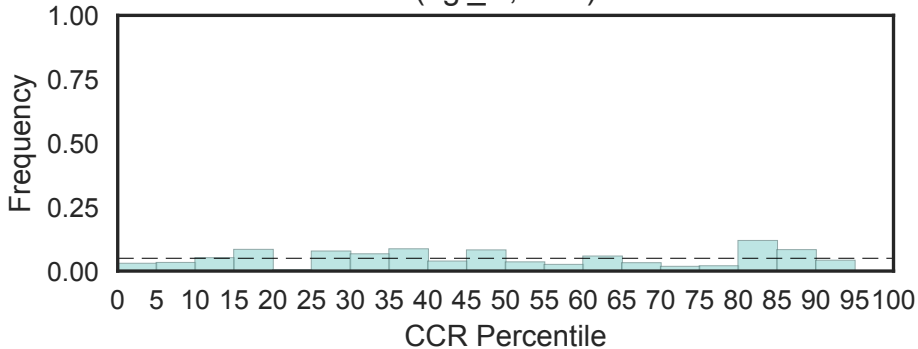

LicD family  
(LicD, N=2)

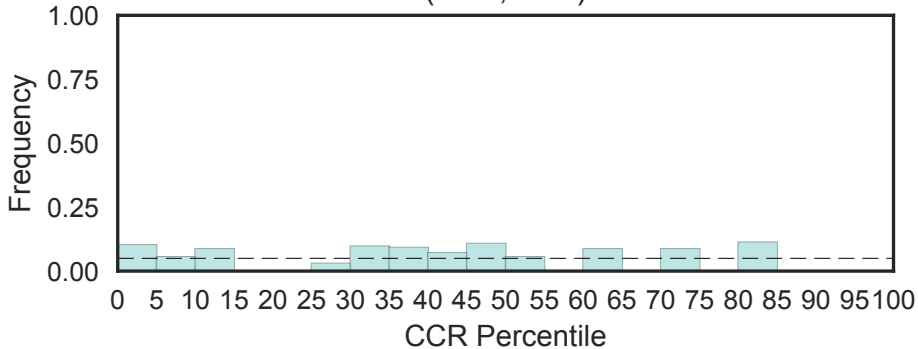



Ligand-gated ion channel  
(Lig\_chan, N=19)

Fisher's OR: 4.18; Bonferroni p-val: 3.41e-11

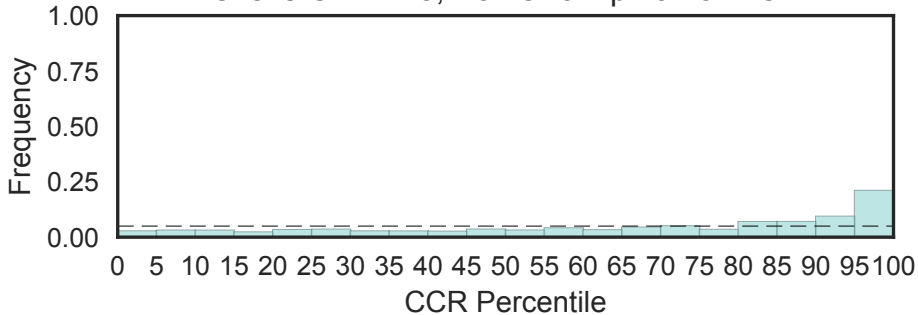

Ligated ion channel L-glutamate- and glycine-binding site  
(Lig\_chan-Glu\_bd, N=17)

Fisher's OR: 4.6; Bonferroni p-val: 0.000148

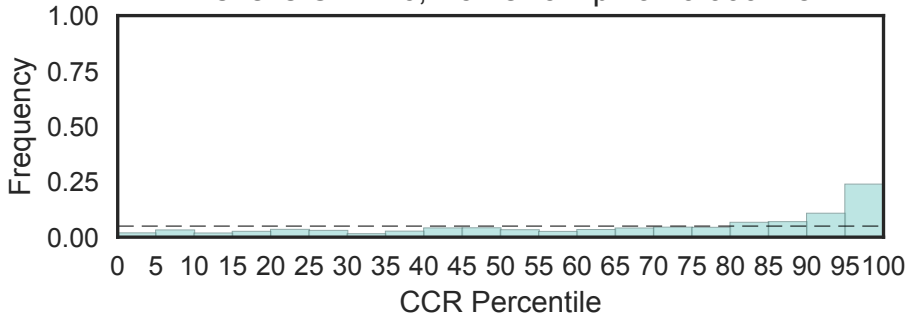

CoA-ligase  
(Ligase\_CoA, N=4)  
Fisher's OR: 0; Bonferroni p-val: 1

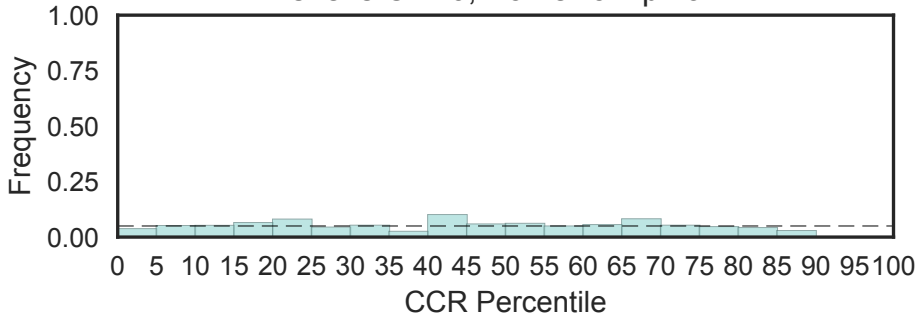

Limkain b1  
(Limkain-b1, N=1)

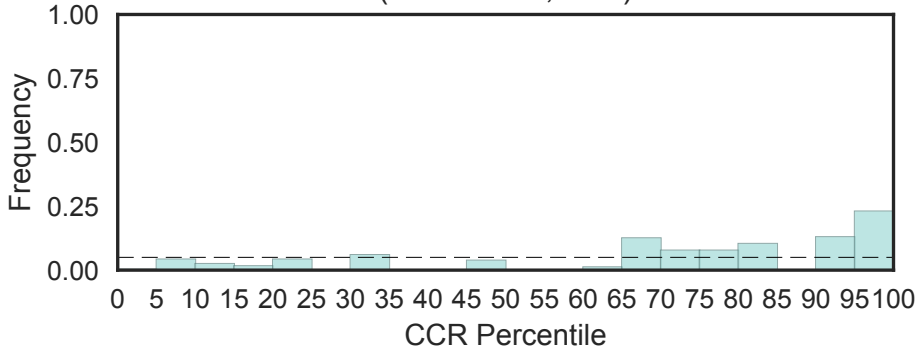

linker histone H1 and H5 family  
(Linker\_histone, N=13)  
Fisher's OR: 1.72; Bonferroni p-val: 1

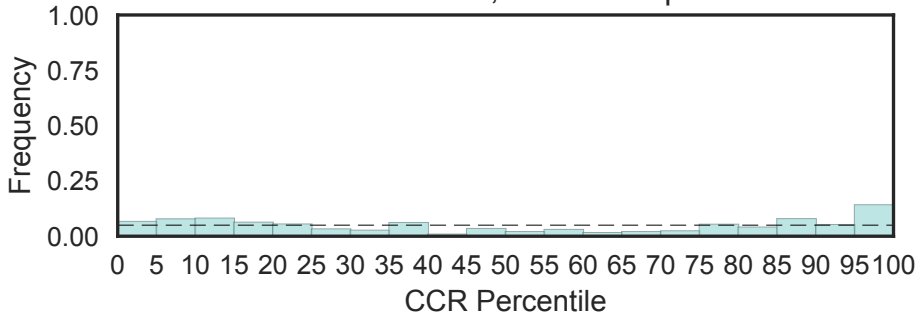

Lipase  
(Lipase, N=10)

Fisher's OR: 0.0782; Bonferroni p-val: 0.565

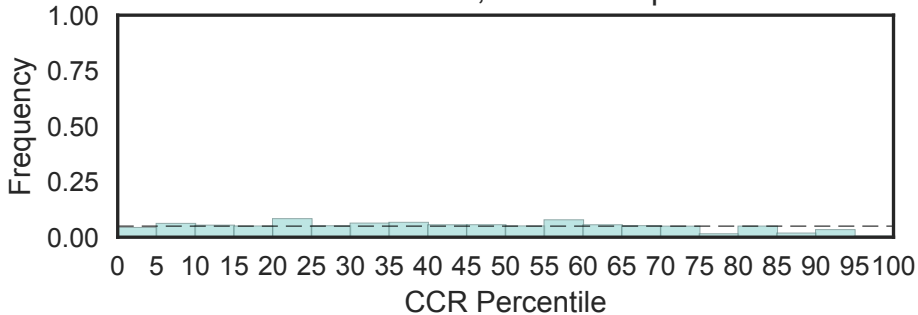

Lipase (class 3)

(Lipase\_3, N=3)

Fisher's OR: 2; Bonferroni p-val: 1

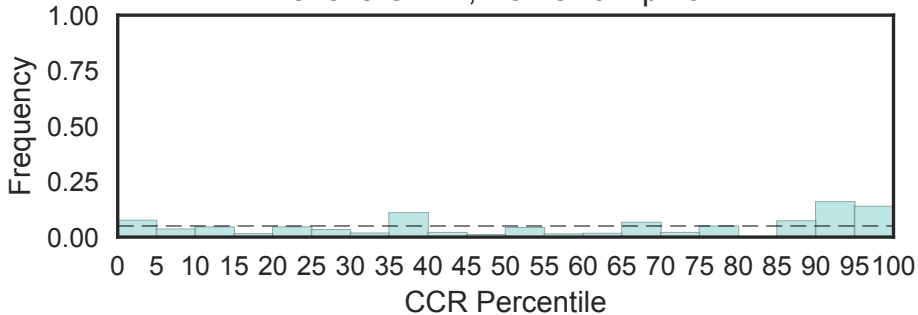

GDSL-like Lipase/Acylhydrolase  
(Lipase\_GDSL, N=5)

Fisher's OR: 0; Bonferroni p-val: 1

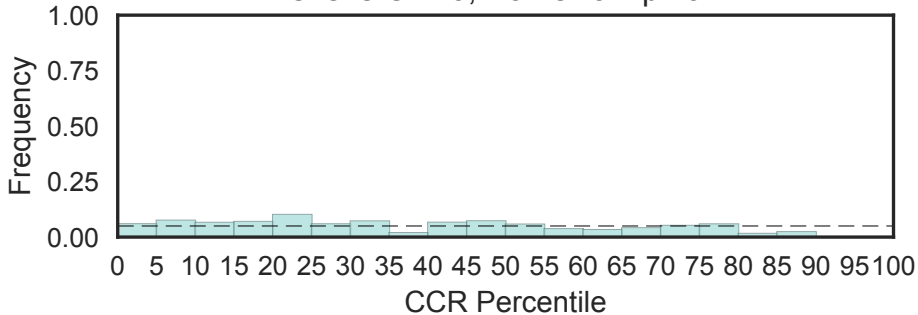



GDSL-like Lipase/Acylhydrolase family  
(Lipase\_GDSL\_2, N=3)

Fisher's OR: 0.53; Bonferroni p-val: 1

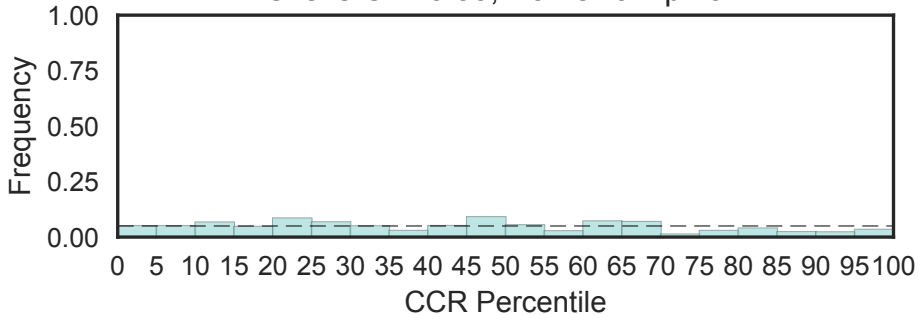

Sphingolipid Delta4-desaturase (DES)  
(Lipid\_DES, N=2)

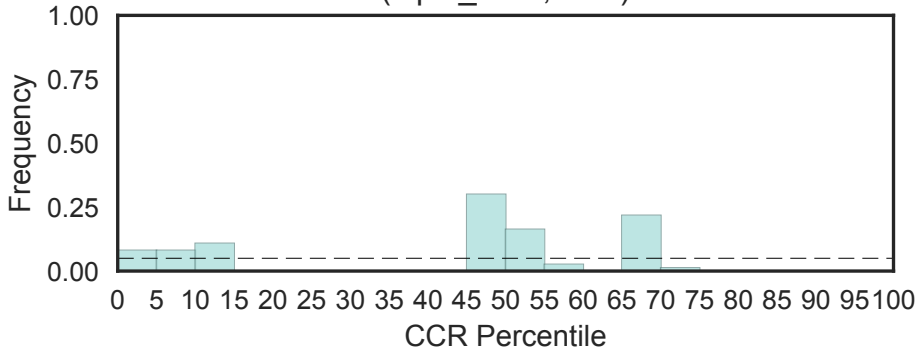

lipin, N-terminal conserved region  
(Lipin\_N, N=3)

Fisher's OR: 0; Bonferroni p-val: 1

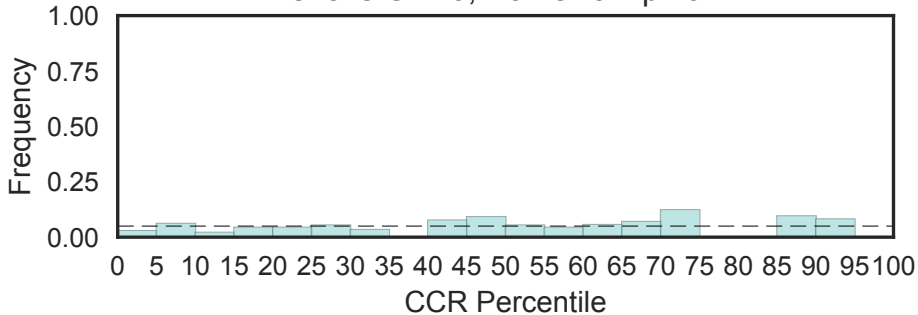

Lipin/Ned1/Smp2 multi-domain protein middle domain  
(Lipin\_mid, N=3)

Fisher's OR: 0.94; Bonferroni p-val: 1

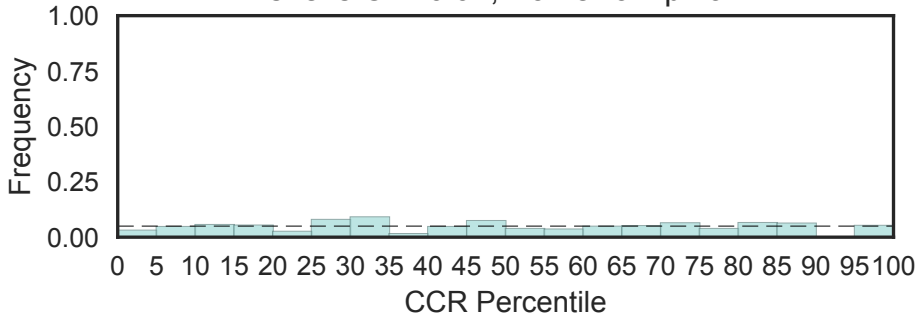

Lipocalin / cytosolic fatty-acid binding protein family  
(Lipocalin, N=34)

Fisher's OR: 0.215; Bonferroni p-val: 1

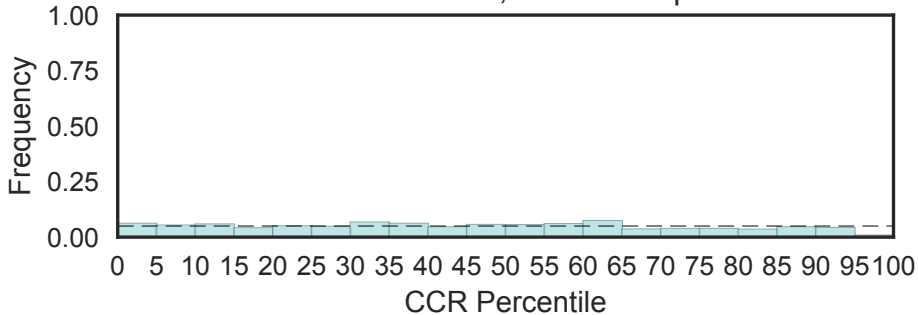

Lipocalin-like domain  
(Lipocalin\_2, N=2)

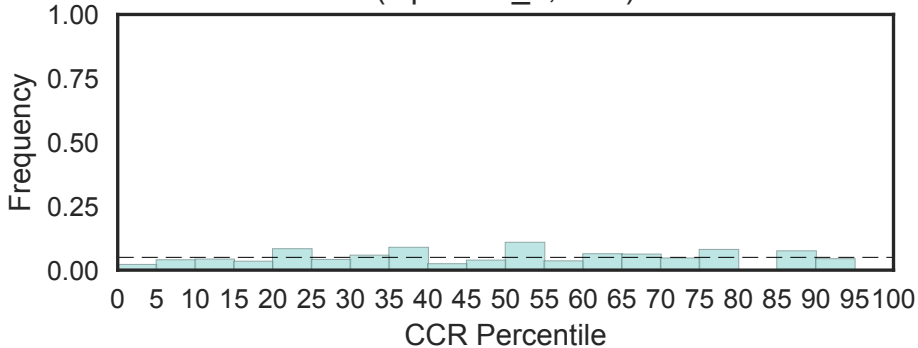

Lipocalin / cytosolic fatty-acid binding protein family  
(Lipocalin\_7, N=11)

Fisher's OR: 0.398; Bonferroni p-val: 1

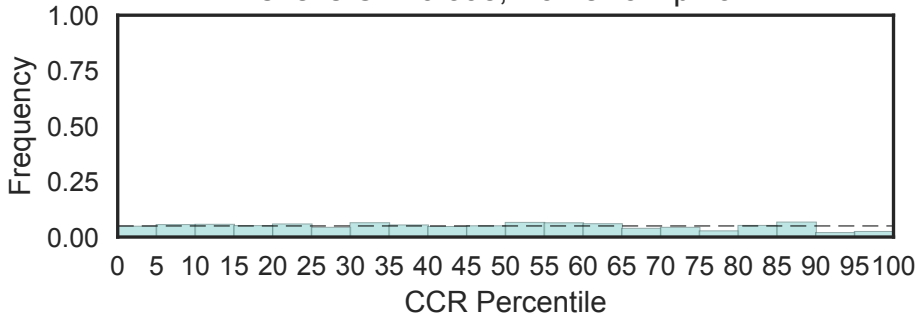

Lipoxygenase  
(Lipoxygenase, N=7)  
Fisher's OR: 0.214; Bonferroni p-val: 1

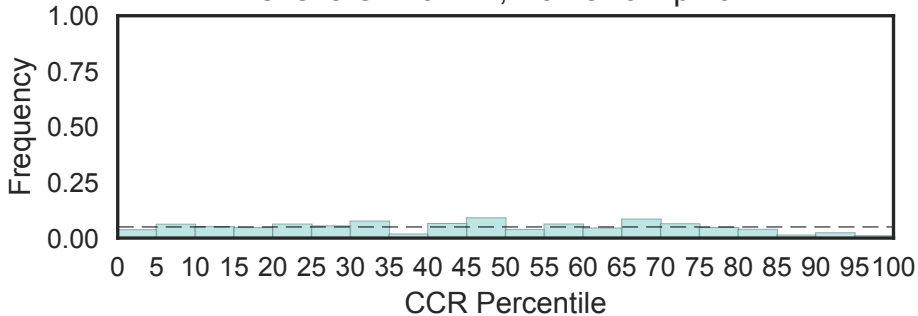



LisH  
(LisH, N=5)

Fisher's OR: 7.21; Bonferroni p-val: 1

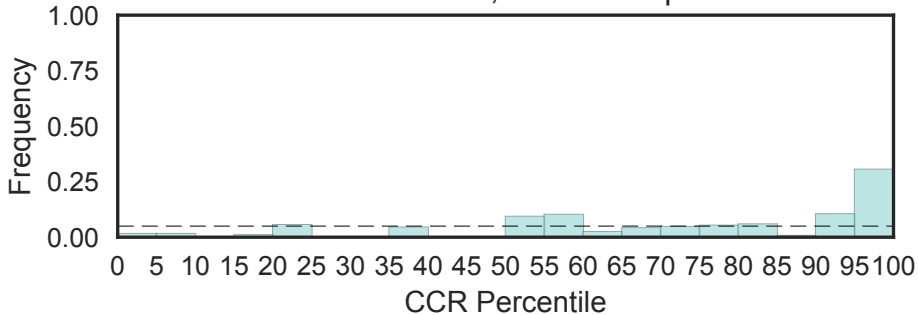

LisH  
(LisH\_2, N=1)

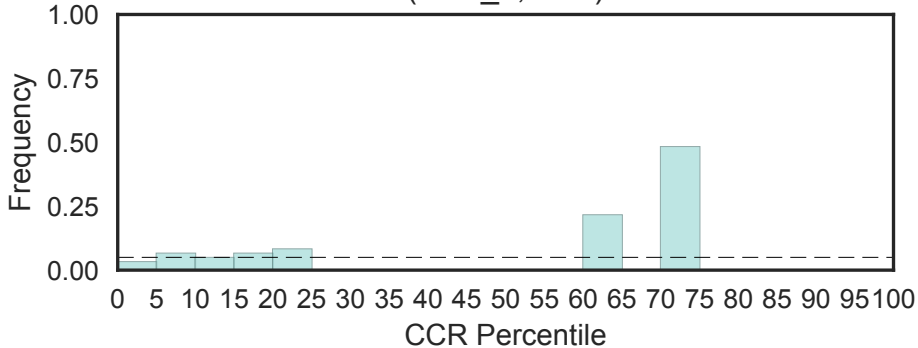

Lon protease (S16) C-terminal proteolytic domain  
(Lon\_C, N=2)

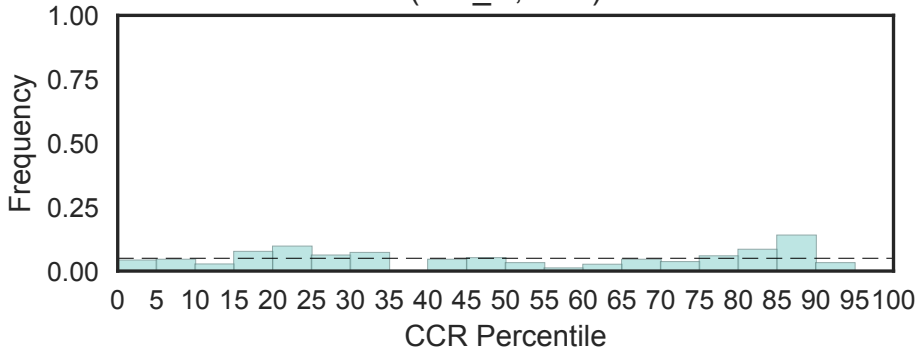

Regulated-SNARE-like domain  
(Longin, N=3)

Fisher's OR: 1.29; Bonferroni p-val: 1

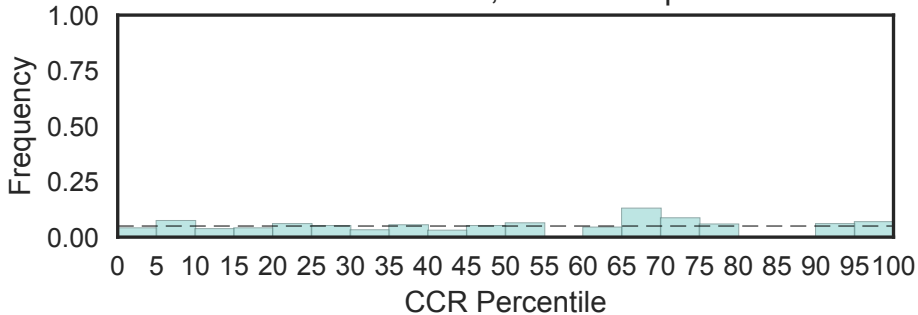

Major keratinocyte cell envelope protein  
(Loricrin, N=1)

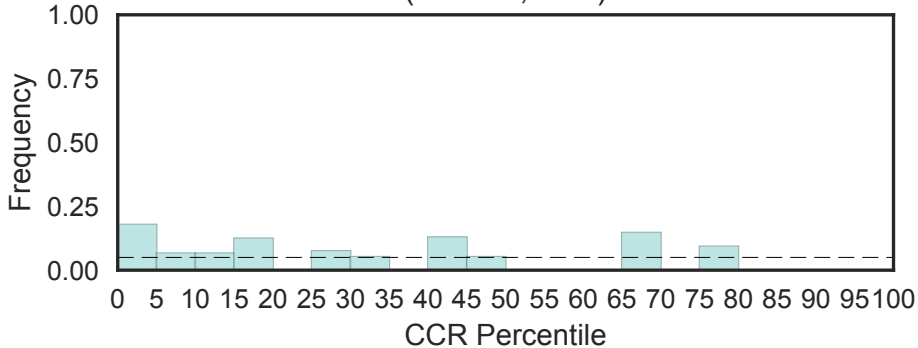

LsmAD domain  
(LsmAD, N=2)

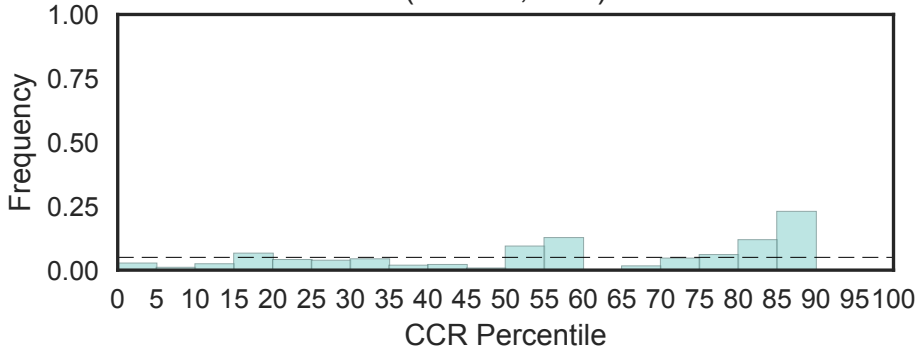

Lsm interaction motif  
(Lsm\_interact, N=1)

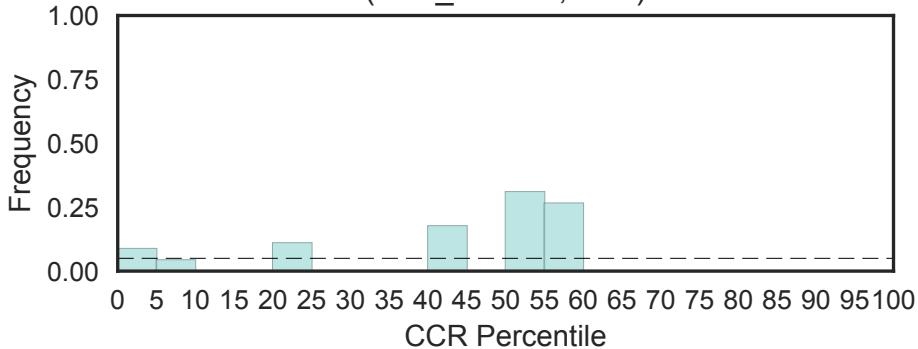

Lung seven transmembrane receptor  
(Lung\_7-TM\_R, N=5)

Fisher's OR: 0.413; Bonferroni p-val: 1

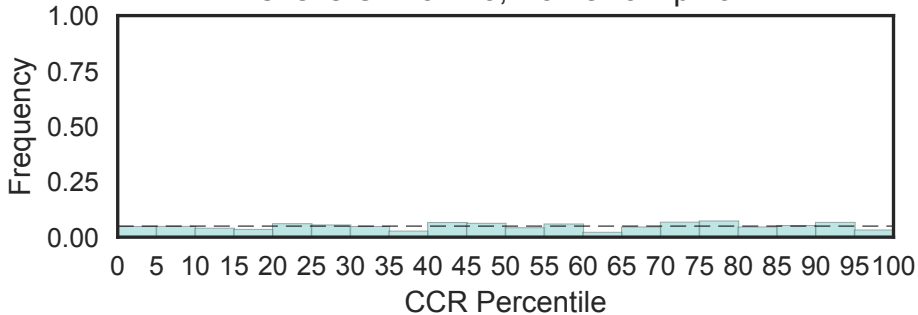



Ly49-like protein, N-terminal region  
(Ly49, N=2)

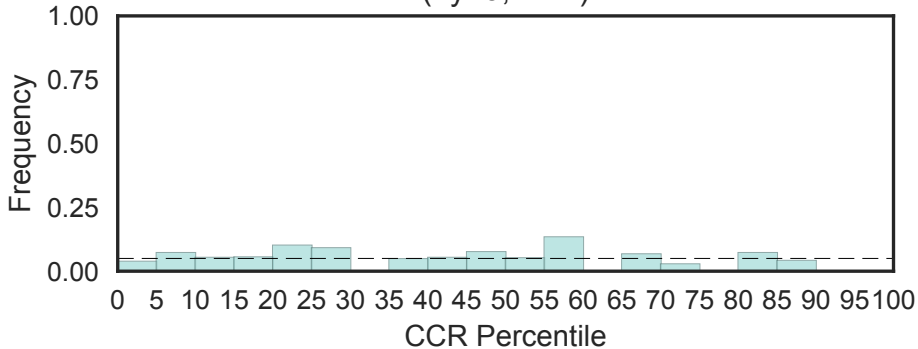

Lyase  
(Lyase\_1, N=5)

Fisher's OR: 0.919; Bonferroni p-val: 1

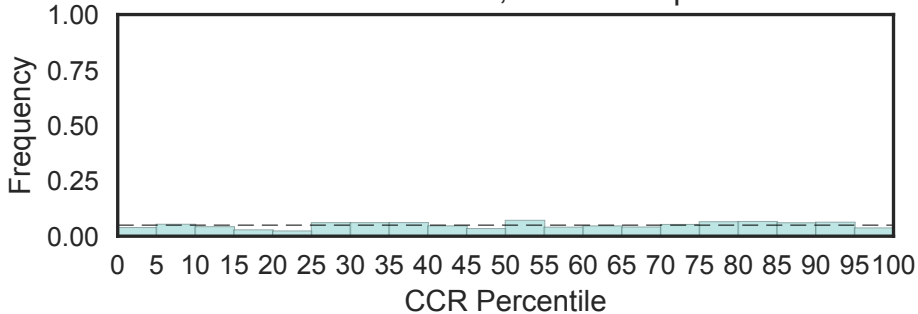

Aromatic amino acid lyase  
(Lyase\_aromatic, N=1)

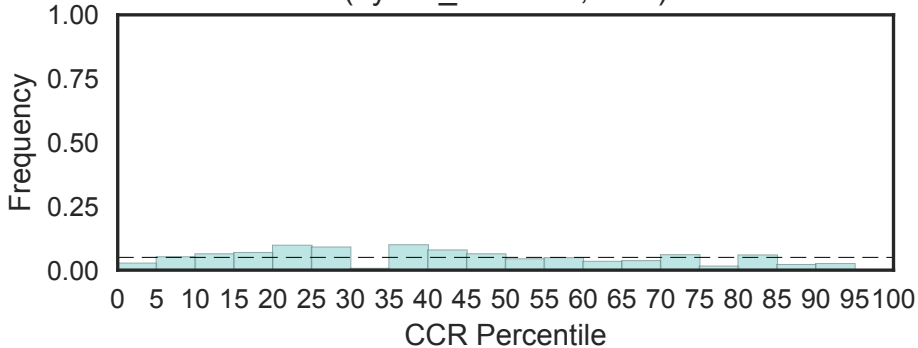

Lycopene cyclase protein  
(Lycopene\_cycl, N=3)  
Fisher's OR: 0; Bonferroni p-val: 1

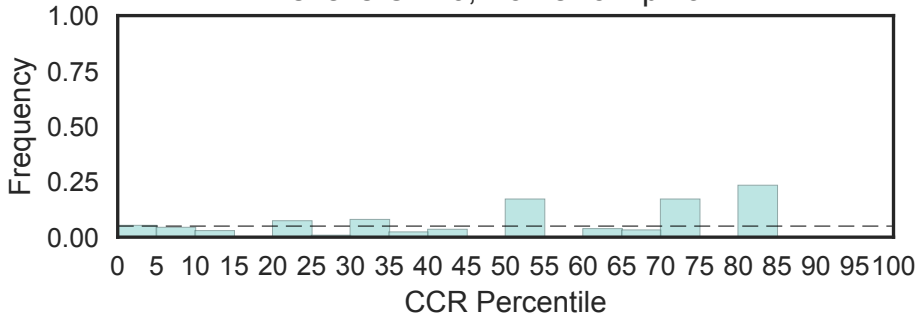

C-type lysozyme/alpha-lactalbumin family  
(Lys, N=7)

Fisher's OR: 0.474; Bonferroni p-val: 1

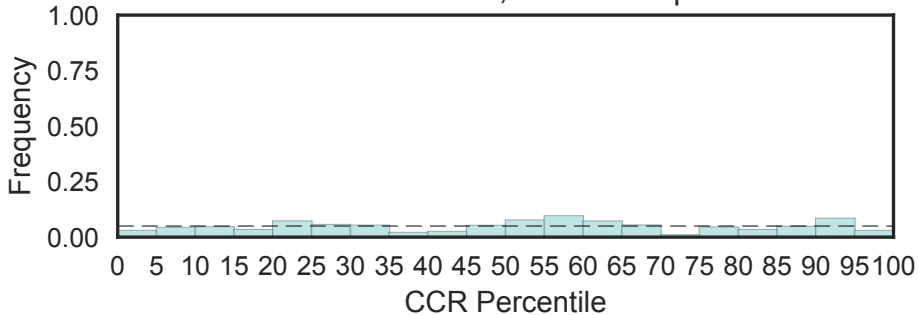

LysM domain  
(LysM, N=6)

Fisher's OR: 1.14; Bonferroni p-val: 1

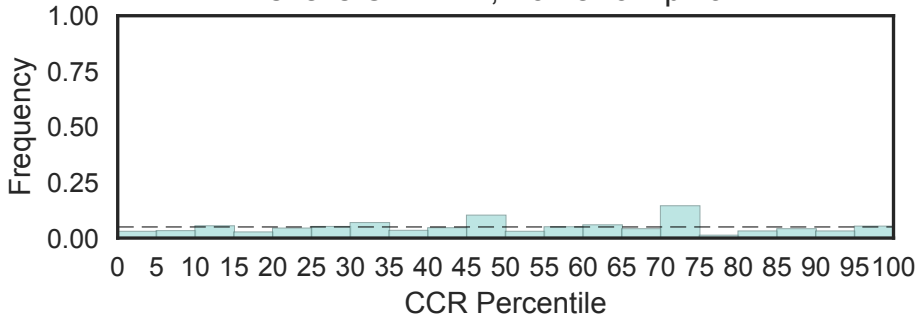

Lysyl oxidase  
(Lysyl\_oxidase, N=5)  
Fisher's OR: 0.565; Bonferroni p-val: 1

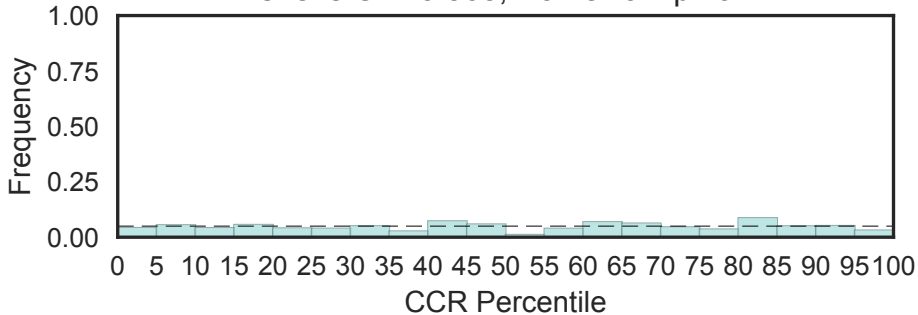

M-phase inducer phosphatase  
(M-inducer\_phosp, N=3)  
Fisher's OR: 0; Bonferroni p-val: 1

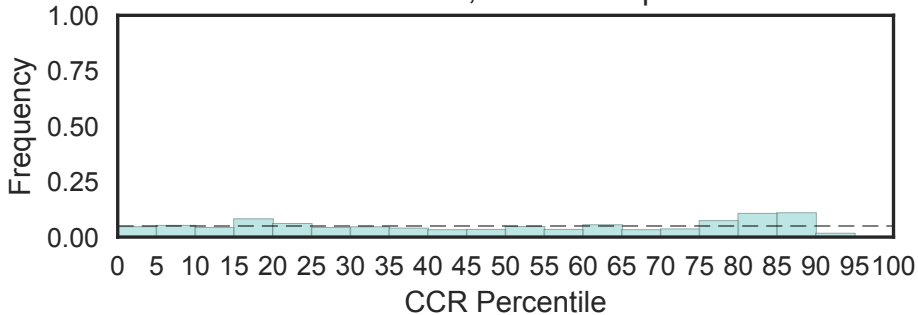



Peptidase M16C associated  
(M16C\_assoc, N=1)

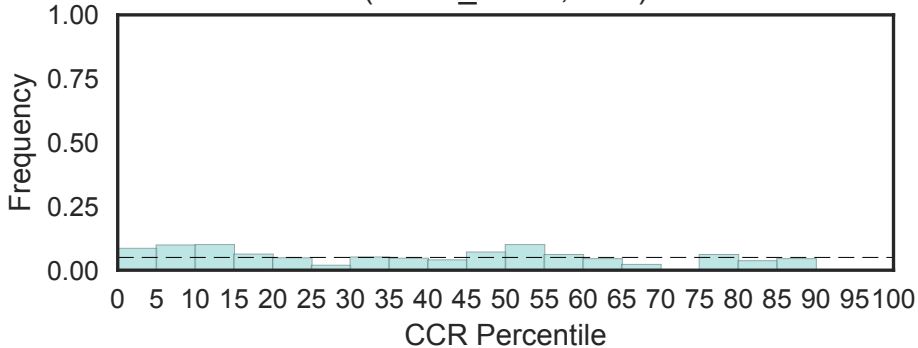

Peptidase dimerisation domain  
(M20\_dimer, N=6)

Fisher's OR: 0; Bonferroni p-val: 1

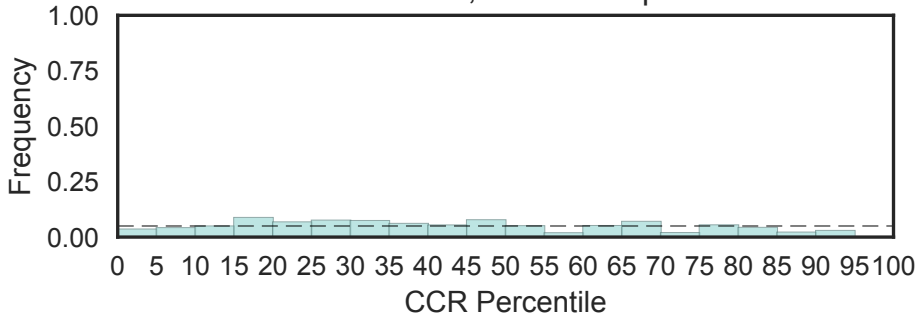

MA3 domain  
(MA3, N=8)

Fisher's OR: 1.85; Bonferroni p-val: 1

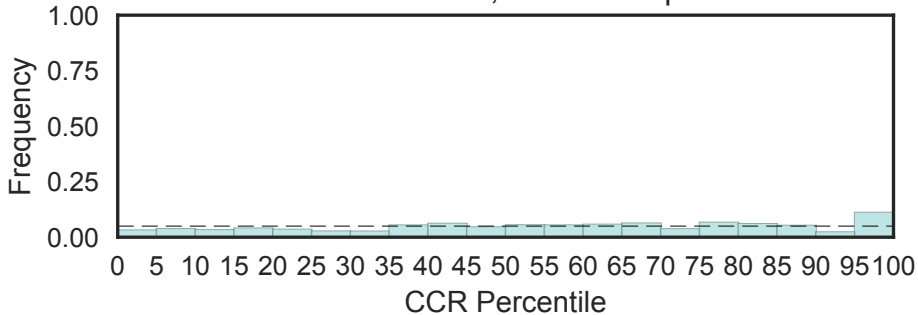

Methylaspartate ammonia-lyase C-terminus  
(MAAL\_C, N=2)

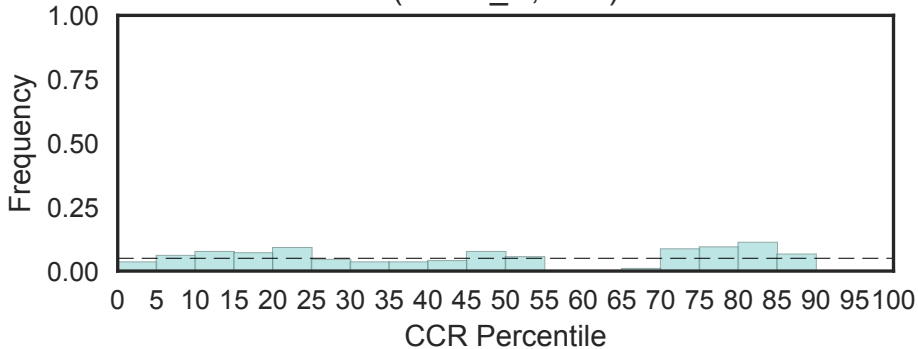

MAC/Perforin domain  
(MACPF, N=11)

Fisher's OR: 0; Bonferroni p-val: 1

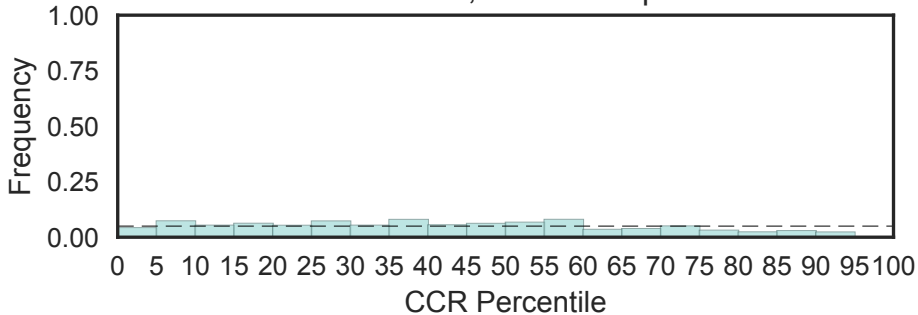

# Mitotic checkpoint protein (MAD, N=2)

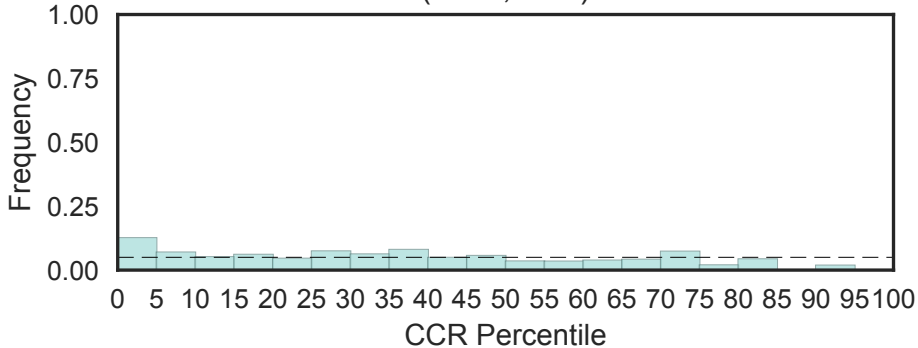

MAGE family  
(MAGE, N=4)

Fisher's OR: 0; Bonferroni p-val: 1

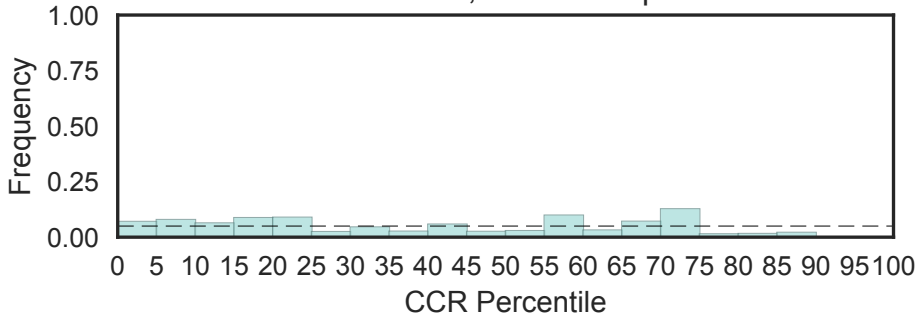

# Unstructured region on MAGI (MAGI\_u1, N=2)

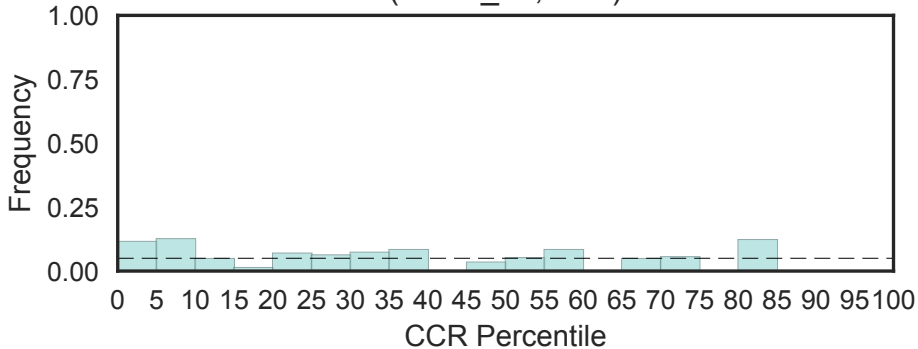



# Unstructured region on MAGI (MAGI\_u5, N=2)

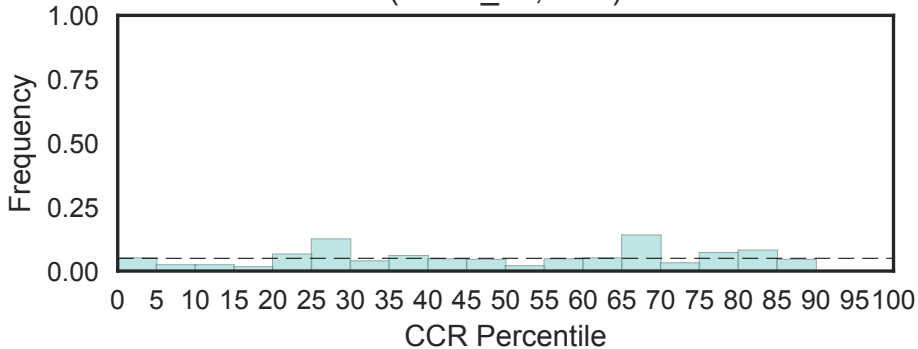

Microfibril-associated glycoprotein (MAGP)  
(MAGP, N=2)

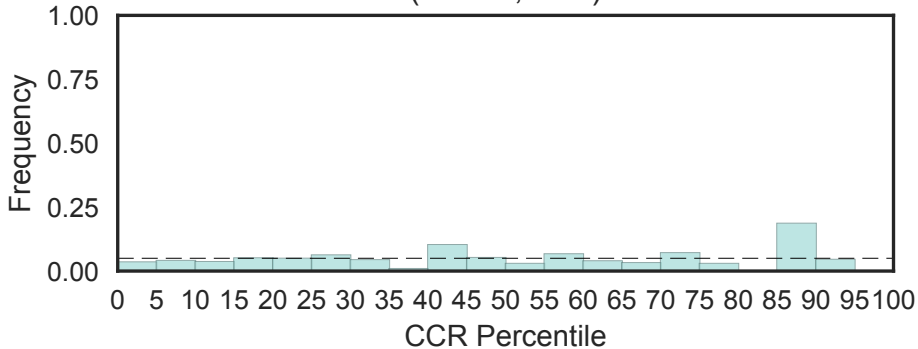

Polyubiquitination (PEST) N-terminal domain of MAGUK  
(MAGUK\_N\_PEST, N=3)

Fisher's OR: 2.79; Bonferroni p-val: 1

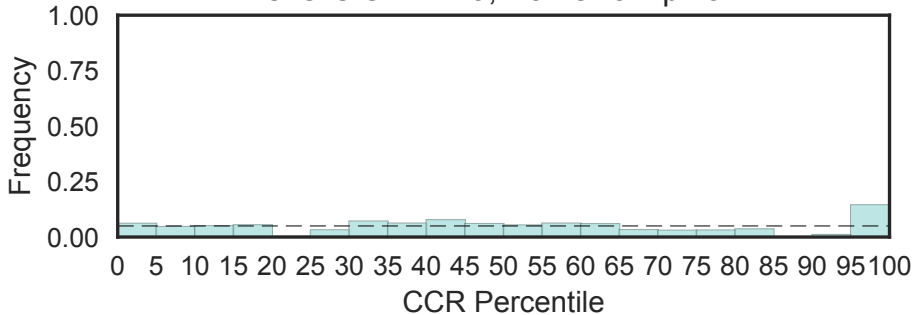

# Membrane-anchored junction protein (MAJIN, N=2)

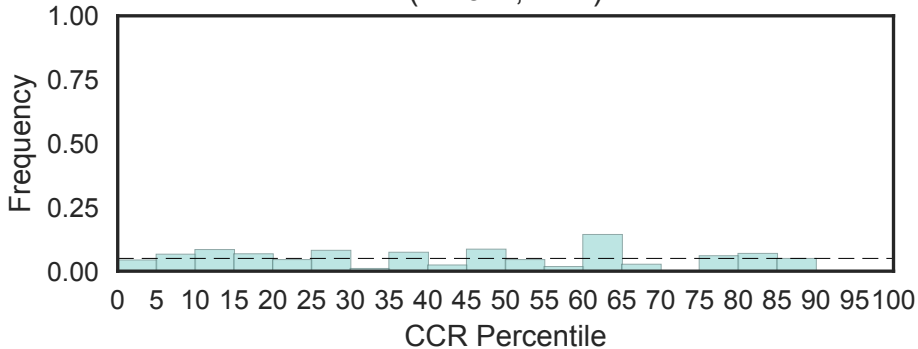

MAM domain, meprin/A5/mu  
(MAM, N=28)

Fisher's OR: 0.313; Bonferroni p-val: 1

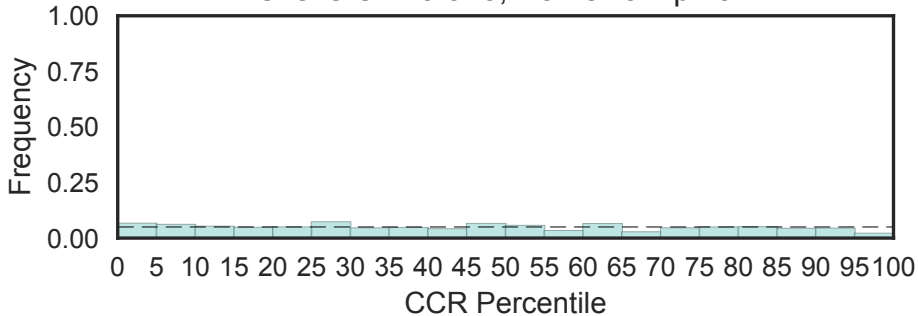

Mitochondrial glycoprotein  
(MAM33, N=1)

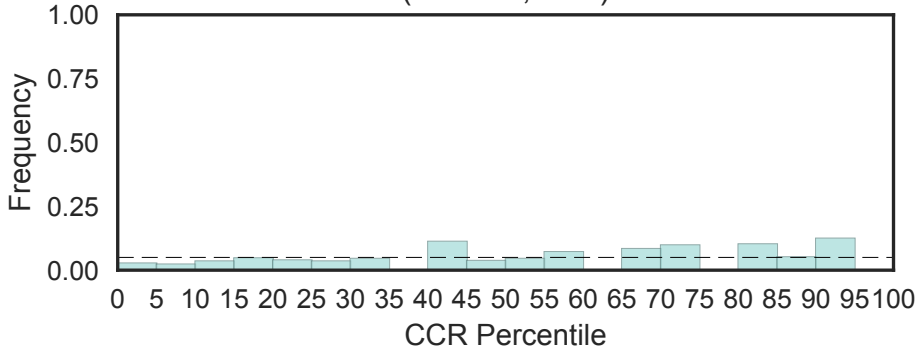

MANEC domain  
(MANEC, N=4)

Fisher's OR: 0; Bonferroni p-val: 1

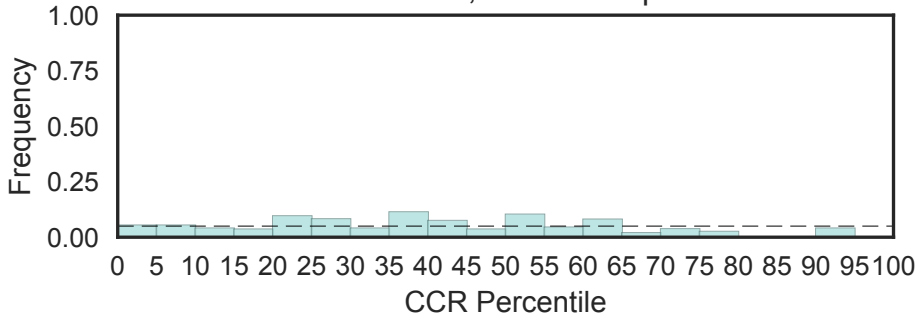

# Membrane-associated protein 117 kDa, PDZK1-interacting protein 1 (MAP17, N=2)

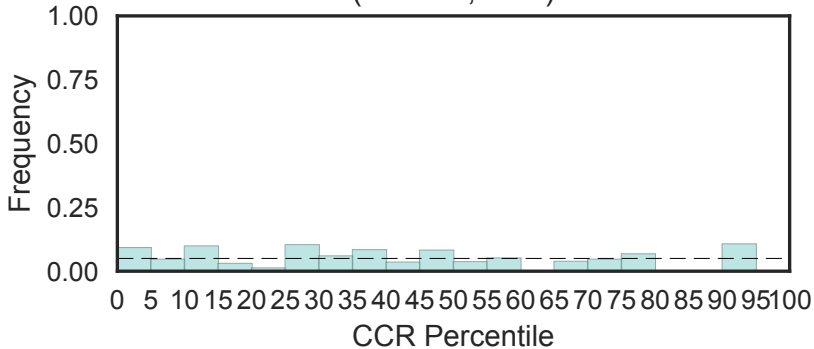



Neuraxin and MAP1B repeat  
(MAP1B\_neuraxin, N=4)  
Fisher's OR: 0; Bonferroni p-val: 1

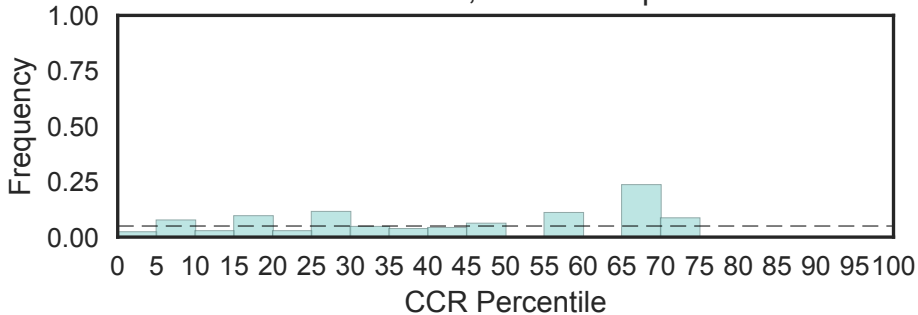

MAP2/Tau projection domain  
(MAP2\_projctn, N=1)

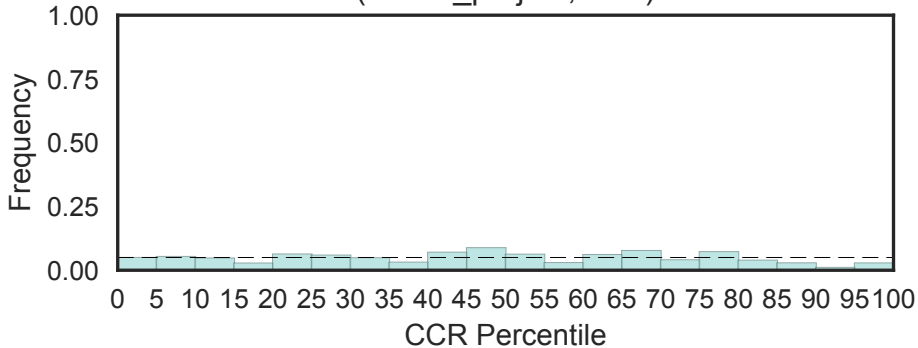

Microtubule associated protein (MAP65/ASE1 family)  
(MAP65\_ASE1, N=2)

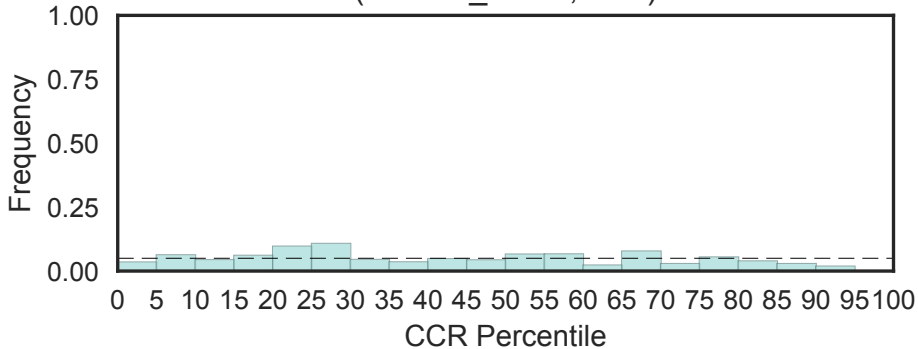

MAP7 (E-MAP-115) family  
(MAP7, N=2)

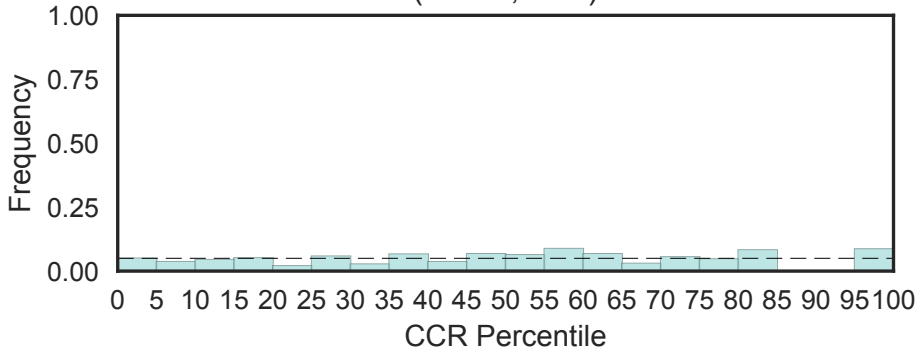

MAPEG family  
(MAPEG, N=6)

Fisher's OR: 0.851; Bonferroni p-val: 1

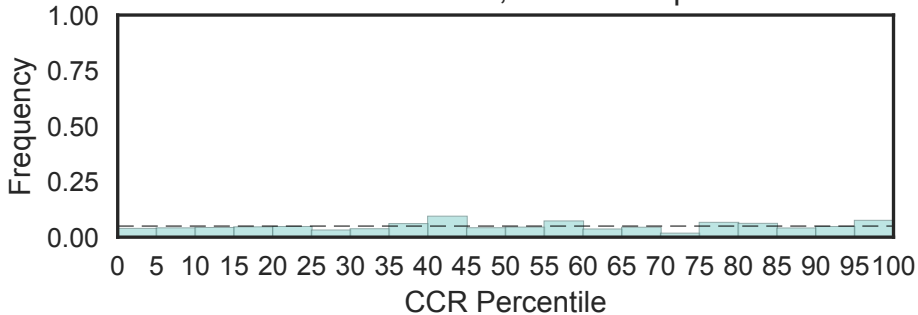

Mitogen-activated protein kinase kinase 1 interacting  
(MAPKK1\_Int, N=1)

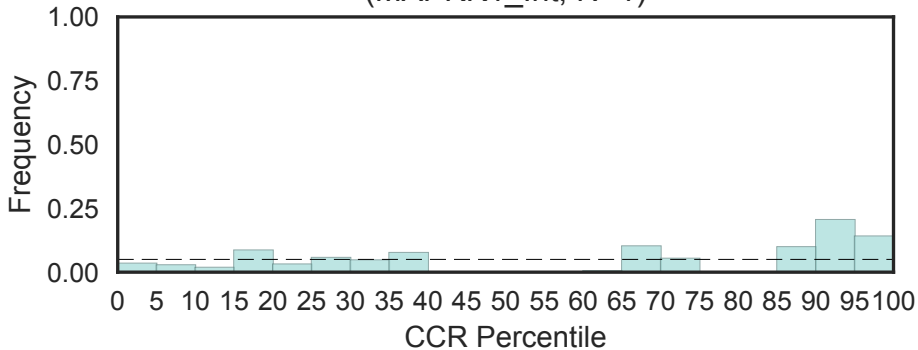

MARCKS family  
(MARCKS, N=3)

Fisher's OR: 0; Bonferroni p-val: 1

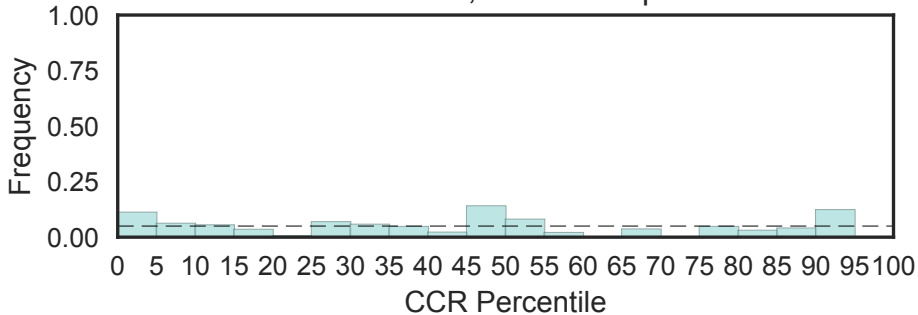

Membrane-associating domain  
(MARVEL, N=25)

Fisher's OR: 0; Bonferroni p-val: 0.0362

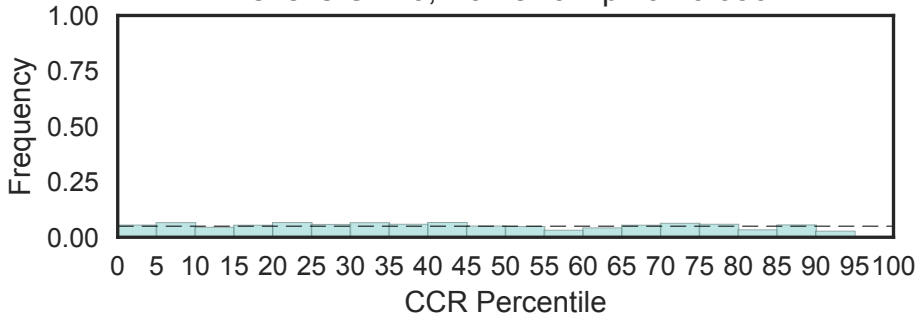



MAS20 protein import receptor  
(MAS20, N=2)

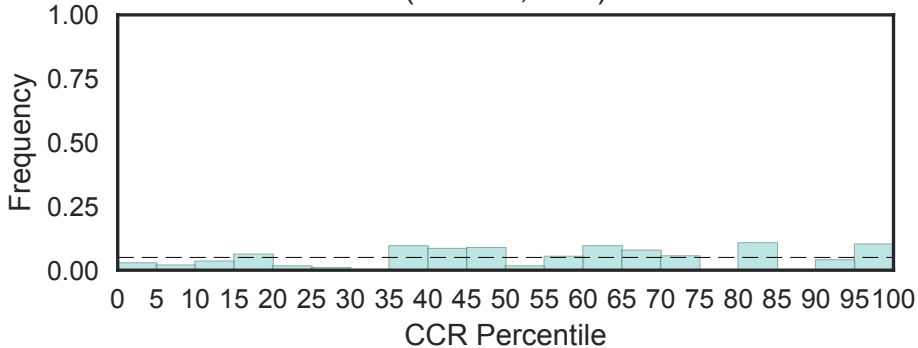

# CDK-activating kinase assembly factor MAT1 (MAT1, N=1)

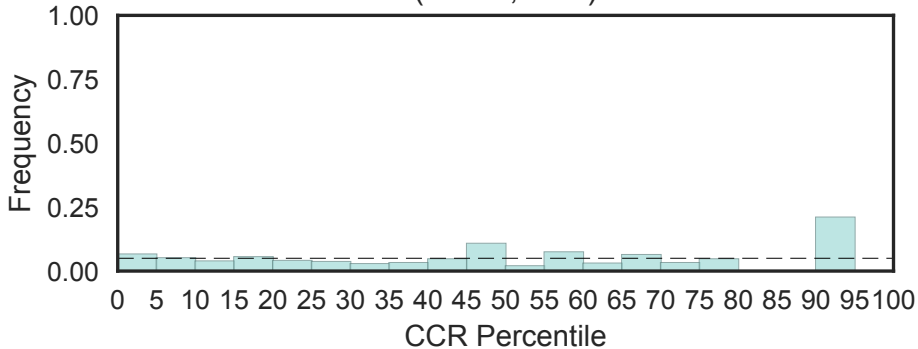

MATH domain  
(MATH, N=5)

Fisher's OR: 6.58; Bonferroni p-val: 0.879

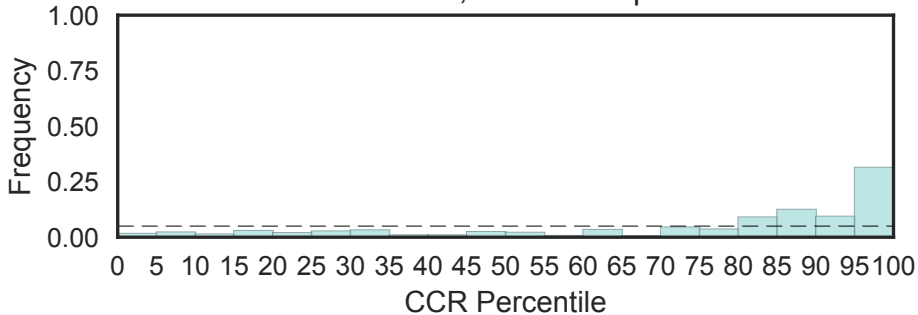

Methyl-CpG binding domain  
(MBD, N=8)

Fisher's OR: 4.3; Bonferroni p-val: 1

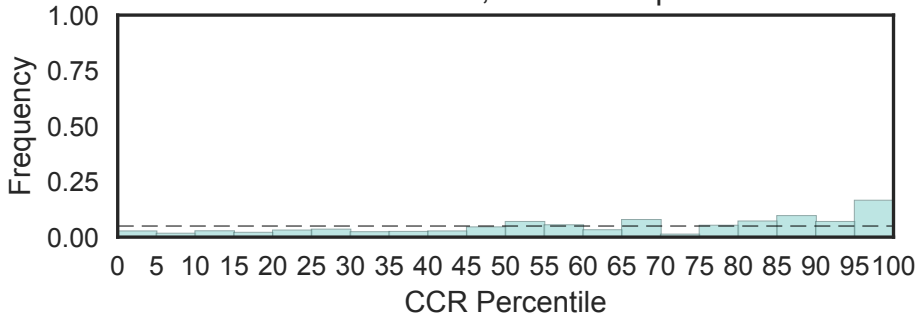

C-terminal domain of methyl-CpG binding protein 2 and 3  
(MBD\_C, N=7)

Fisher's OR: 1.14; Bonferroni p-val: 1

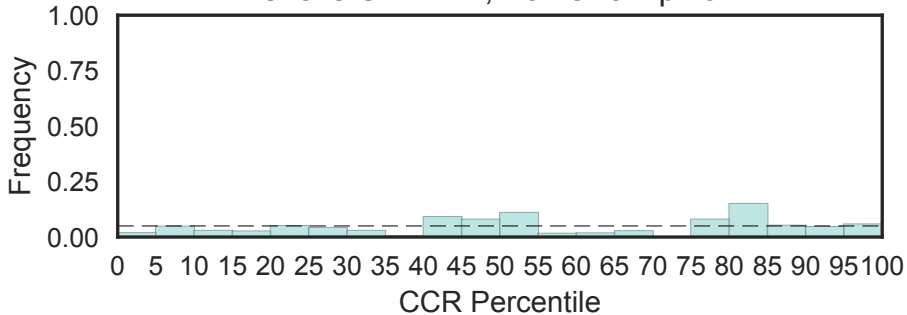

p55-binding region of Methyl-CpG-binding domain proteins MBD  
(MBDa, N=7)

Fisher's OR: 1.08; Bonferroni p-val: 1

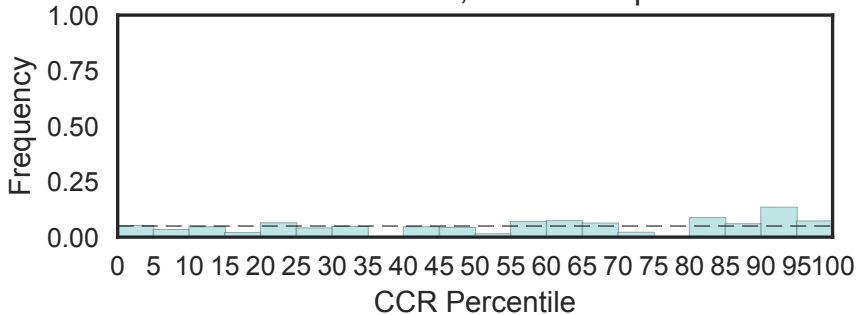

# Multiprotein bridging factor 1 (MBF1, N=1)

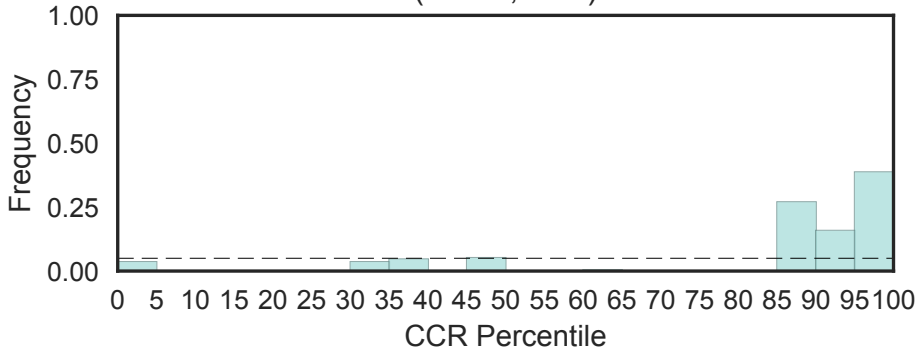

MBOAT, membrane-bound O-acyltransferase family  
(MBOAT, N=11)

Fisher's OR: 0.621; Bonferroni p-val: 1

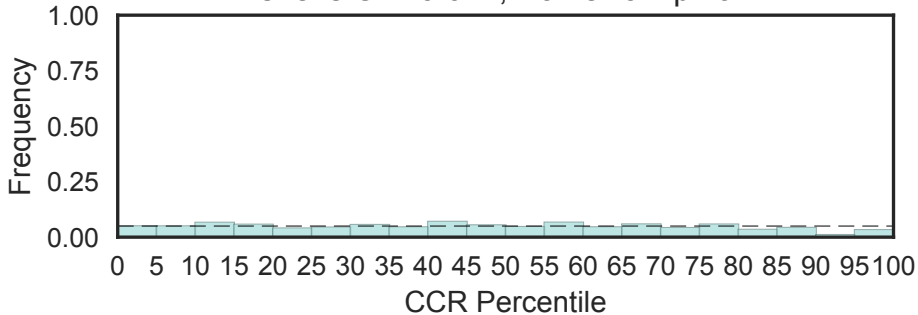



mbt repeat  
(MBT, N=28)

Fisher's OR: 0.873; Bonferroni p-val: 1

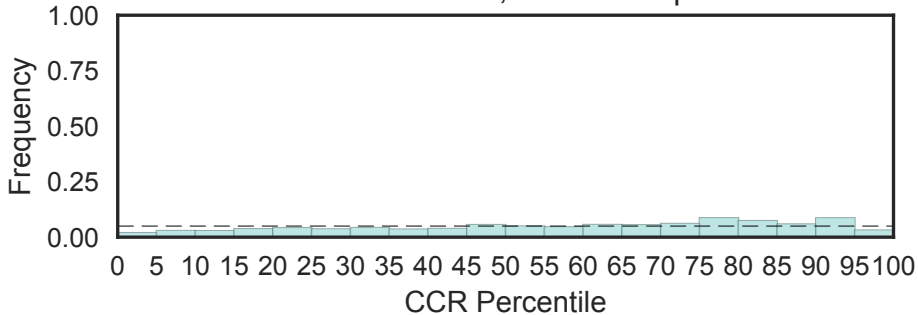

PDZ domain of MCC-2 bdg protein for Usher syndrome  
(MCC-bdg\_PDZ, N=3)

Fisher's OR: 0; Bonferroni p-val: 1

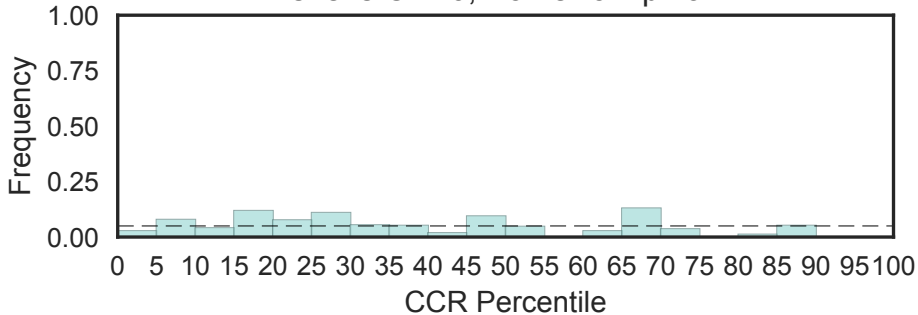

Malonyl-CoA decarboxylase C-terminal domain  
(MCD, N=1)

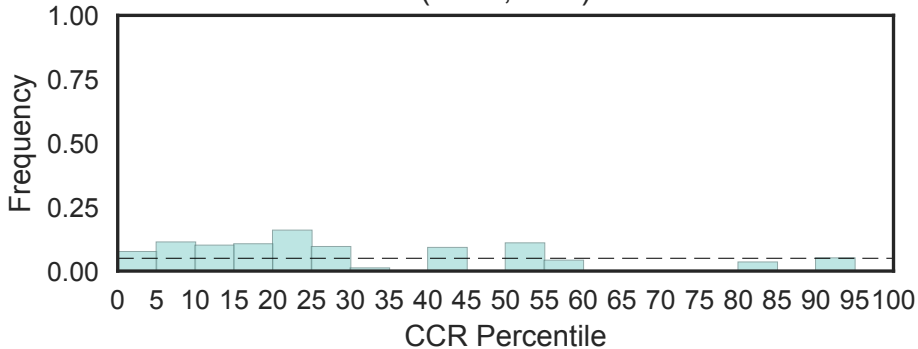

Malonyl-CoA decarboxylase N-terminal domain  
(MCD\_N, N=1)

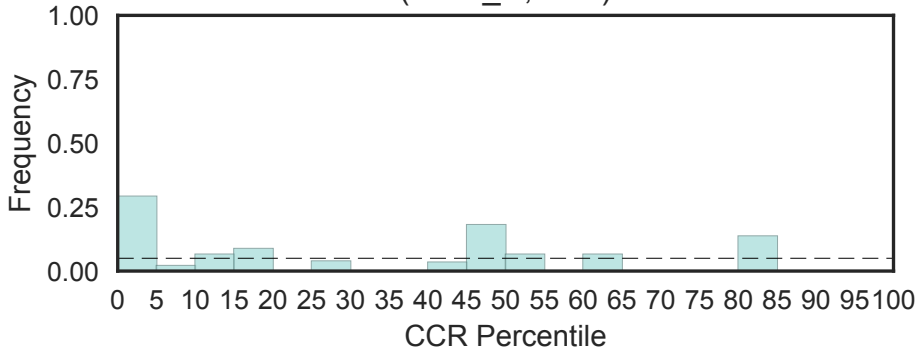

Mid-1-related chloride channel (MCLC)  
(MCLC, N=1)

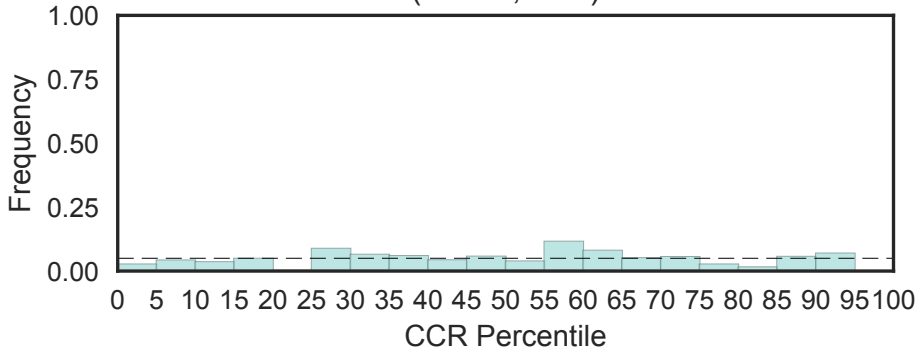

MCM2/3/5 family  
(MCM, N=10)

Fisher's OR: 0.504; Bonferroni p-val: 1

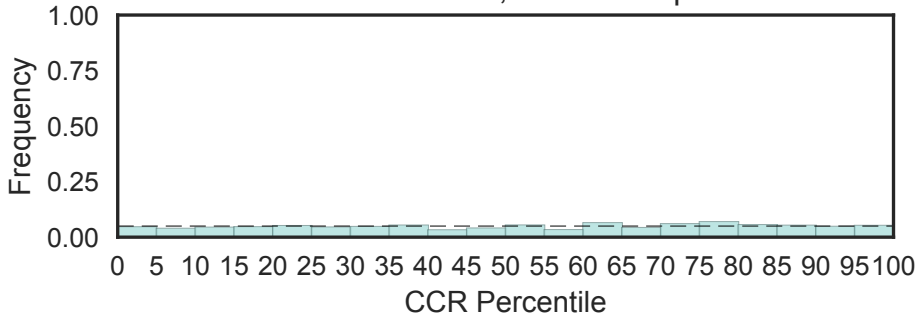

# Mini-chromosome maintenance protein 2 (MCM2\_N, N=1)

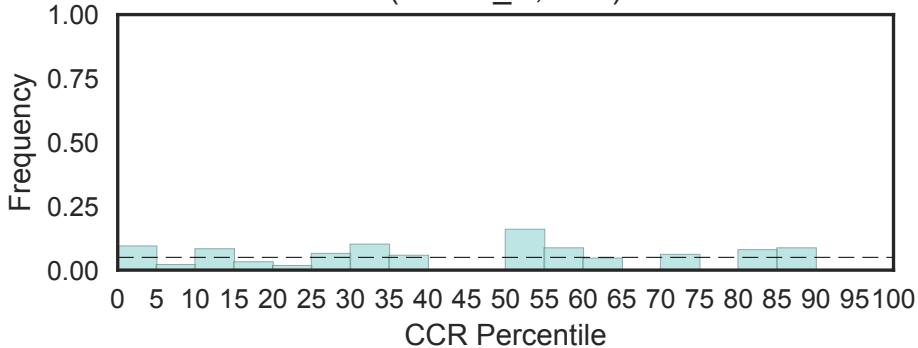

MCM3AP domain of GANP  
(MCM3AP\_GANP, N=1)

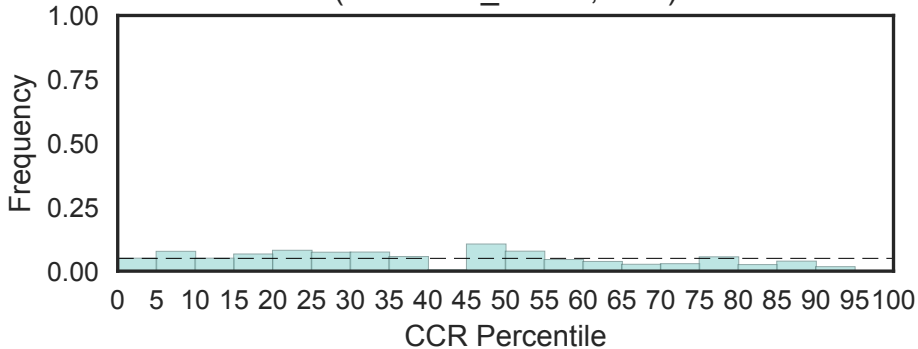



MCM N-terminal domain  
(MCM\_N, N=6)

Fisher's OR: 0; Bonferroni p-val: 1

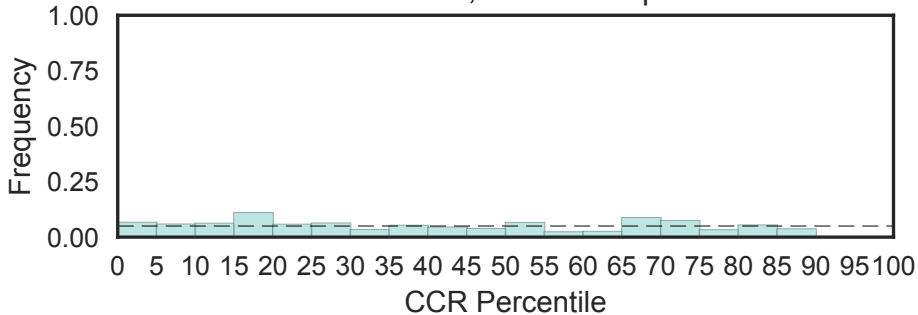

MCM OB domain  
(MCM\_OB, N=8)

Fisher's OR: 0; Bonferroni p-val: 1

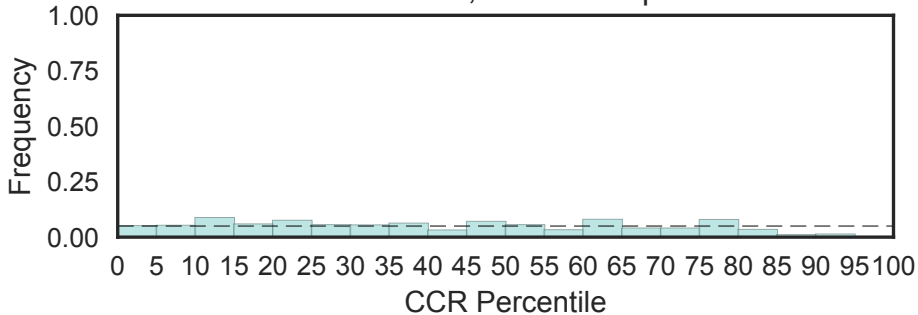

# Mini-chromosome maintenance replisome factor (MCM\_bind, N=1)

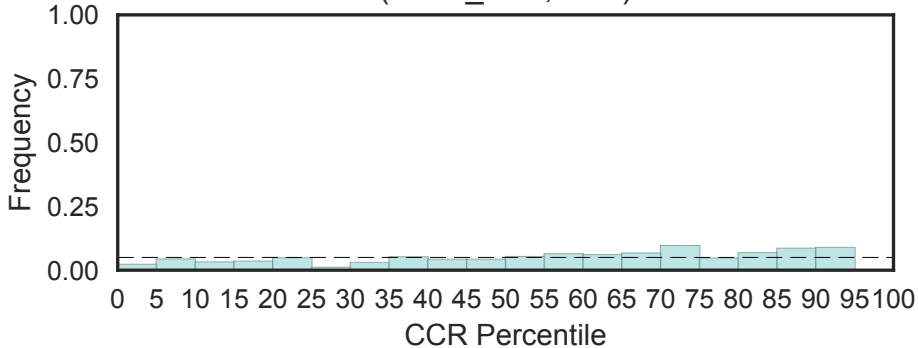

N-terminal region of micro-spherule protein  
(MCRS\_N, N=1)

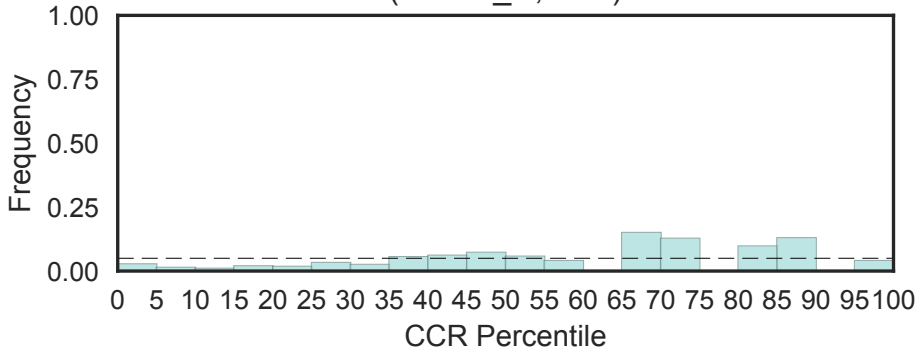

# Mitochondrial calcium uniporter (MCU, N=2)

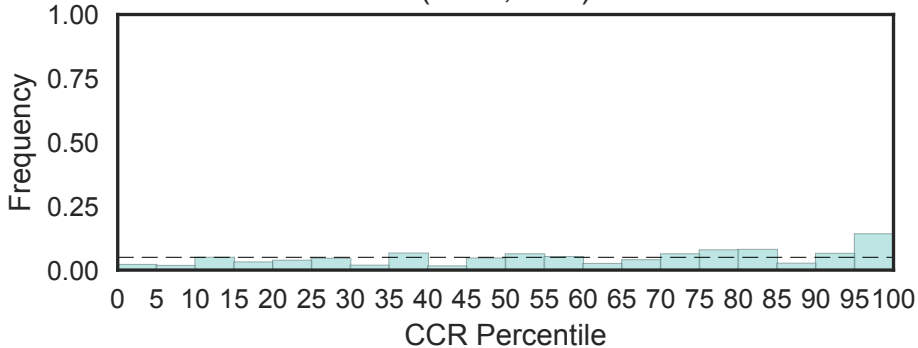

MyoD family inhibitor  
(MDFI, N=2)

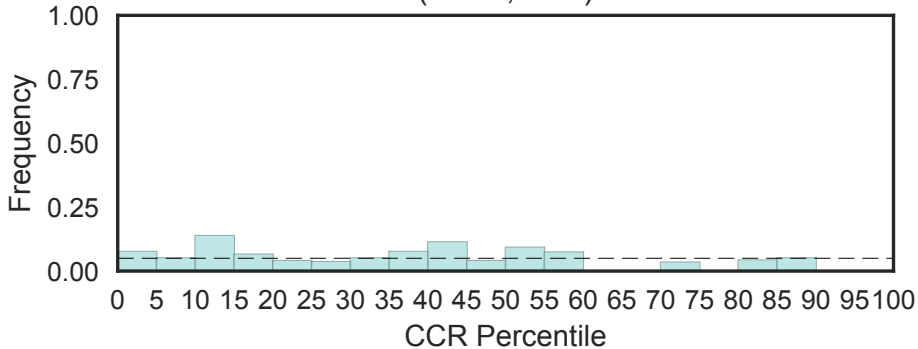

# Nuclear protein MDM1 (MDM1, N=1)

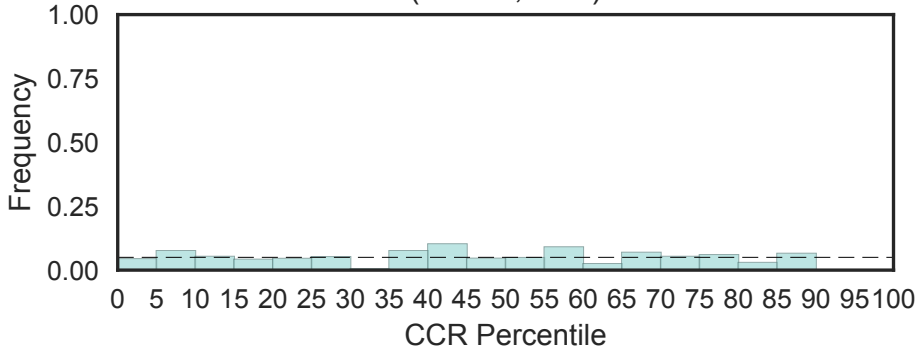

Male enhanced antigen 1 (MEA1)  
(MEA1, N=2)

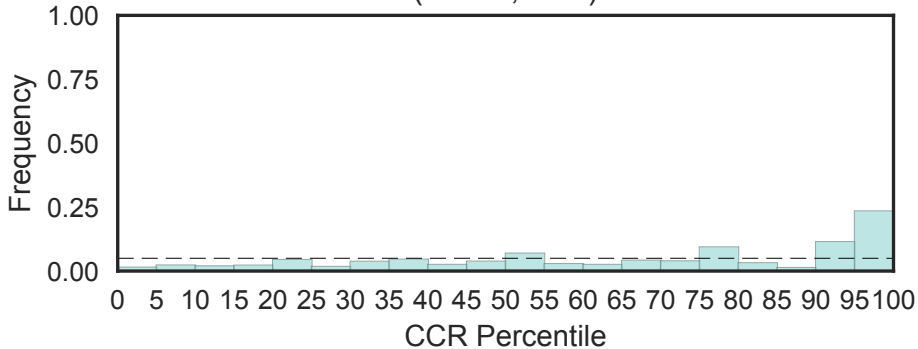



MEF2 binding  
(MEF2\_binding, N=1)

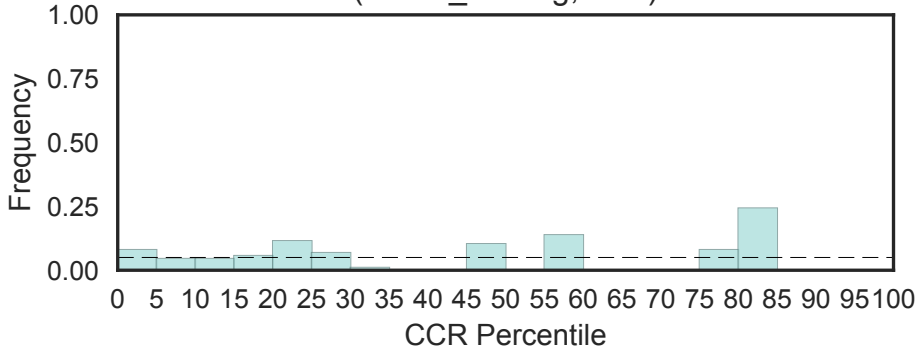

# Meiosis-specific coiled-coil domain-containing protein MEIOC (MEIOC, N=2)

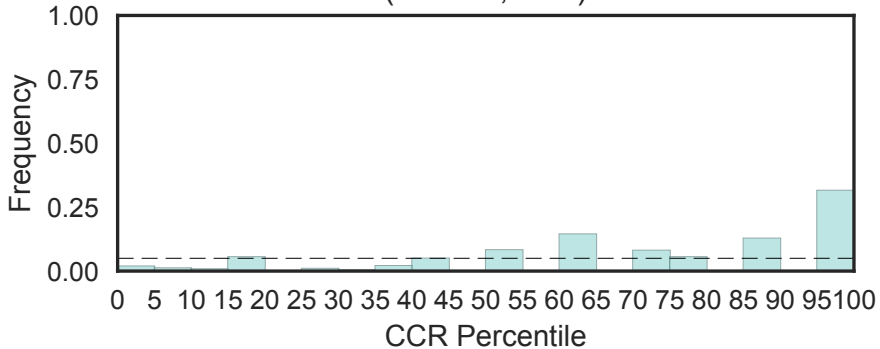

# Cholesterol-capturing domain (MENTAL, N=2)

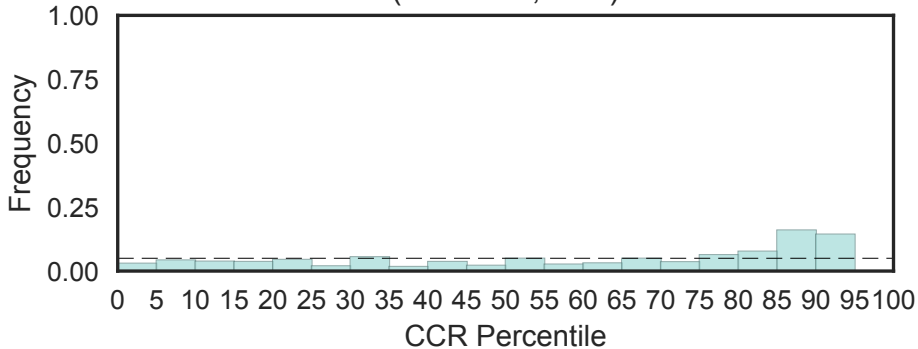

Microfibril-associated/Pre-mRNA processing  
(MFAP1, N=1)

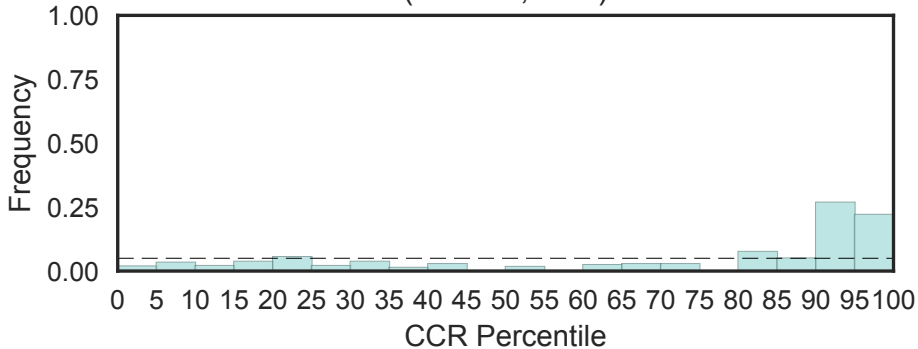

Major Facilitator Superfamily  
(MFS\_1, N=129)

Fisher's OR: 0.378; Bonferroni p-val: 1.48e-13

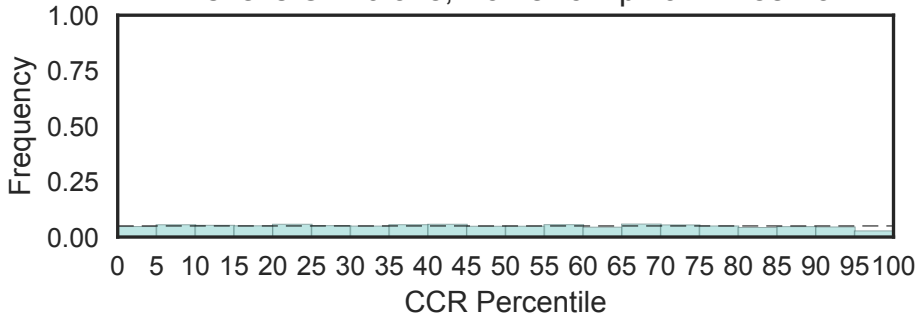

MFS\_1 like family  
(MFS\_1\_like, N=4)

Fisher's OR: 0.744; Bonferroni p-val: 1

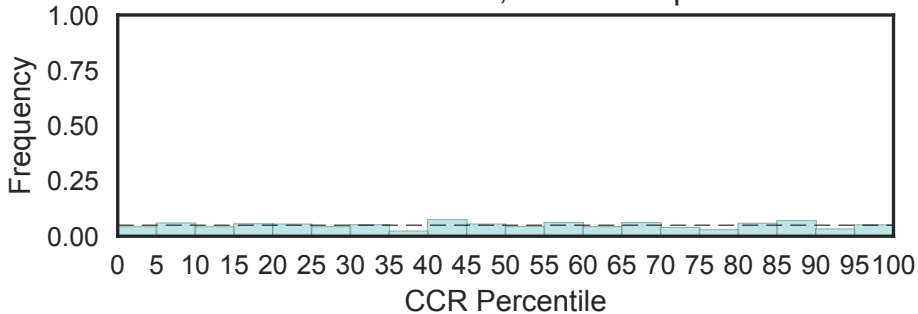

MFS/sugar transport protein  
(MFS\_2, N=9)

Fisher's OR: 0.309; Bonferroni p-val: 1

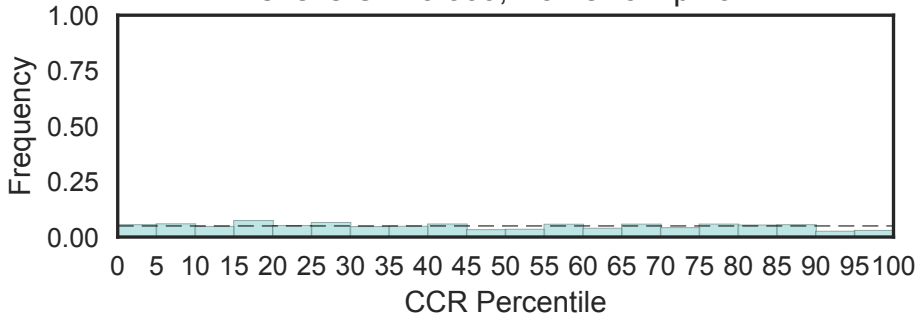

Sugar-transporters, 12 TM  
(MFS\_5, N=1)

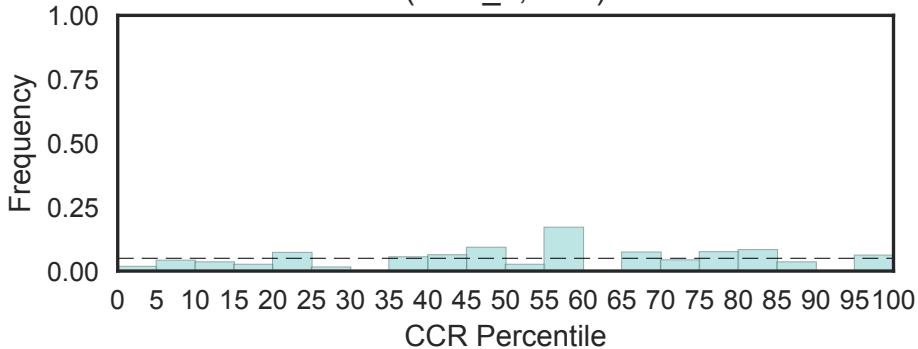



# N-acetylglucosaminyltransferase II (MGAT2) (MGAT2, N=1)

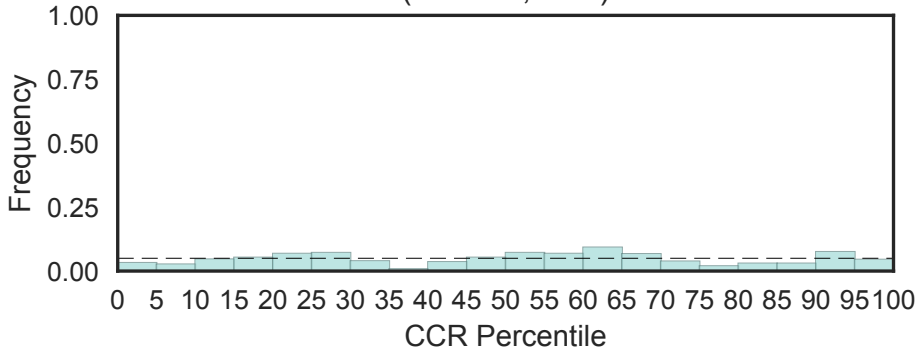

Multi-glycosylated core protein 24 (MGC-24), sialomucin  
(MGC-24, N=3)

Fisher's OR: 0; Bonferroni p-val: 1

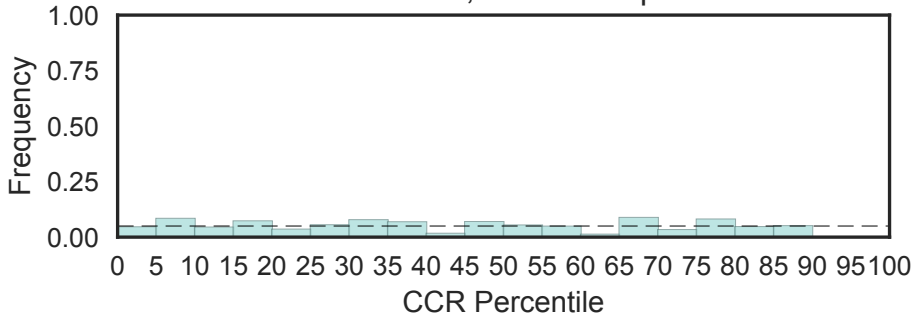

MGS-like domain  
(MGS, N=3)

Fisher's OR: 2.08; Bonferroni p-val: 1

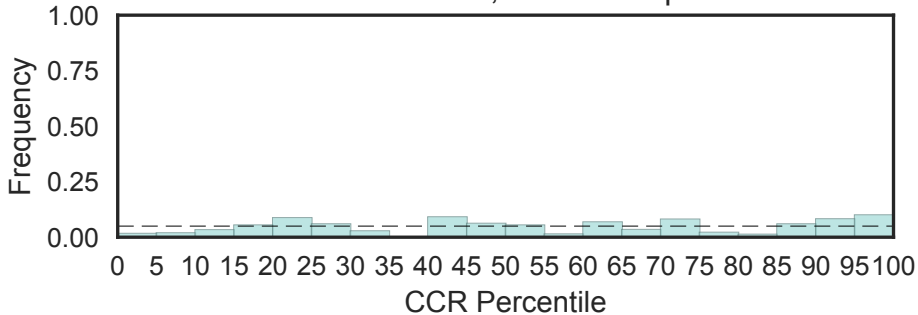

MH1 domain  
(MH1, N=13)

Fisher's OR: 8.13; Bonferroni p-val: 9.87e-08

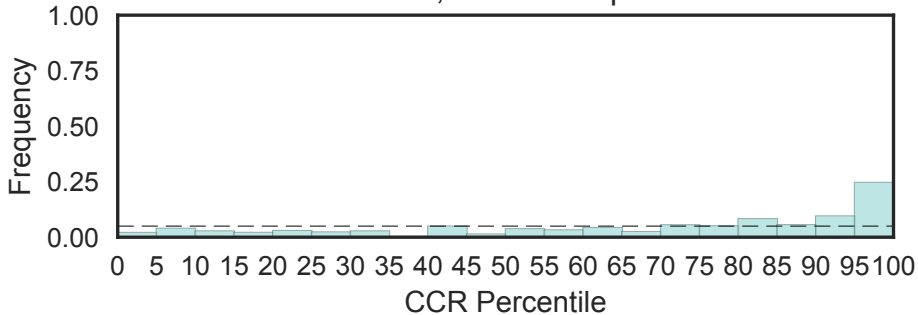

MH2 domain  
(MH2, N=8)

Fisher's OR: 5.5; Bonferroni p-val: 4.6e-05

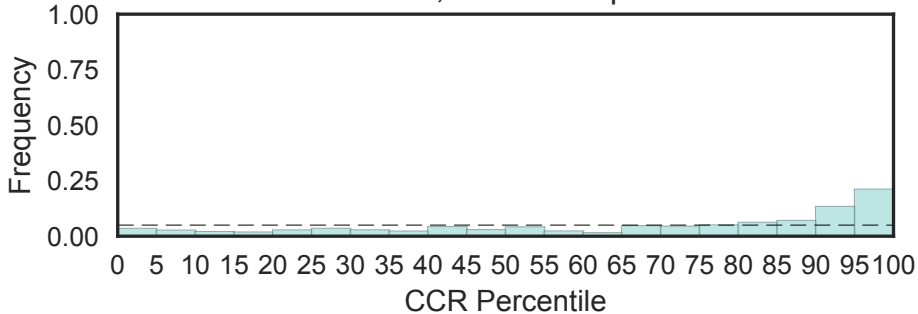

CLIP, MHC2 interacting  
(MHC2-interact, N=1)

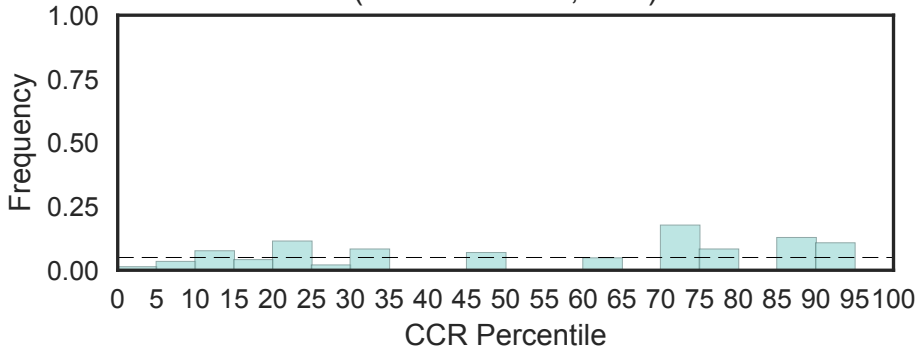

Class I Histocompatibility antigen, domains alpha 1 and 2  
(MHC\_I, N=22)

Fisher's OR: 0.458; Bonferroni p-val: 1

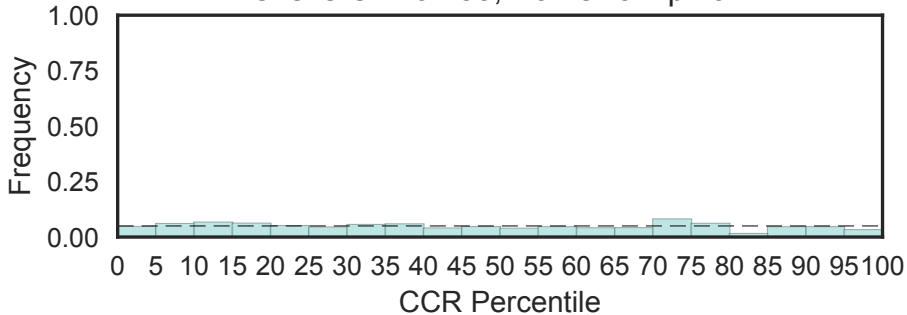

# Class I Histocompatibility antigen, NKG2D ligand, domains 1 and 2 (MHC\_I\_2, N=6)

Fisher's OR: 0; Bonferroni p-val: 1

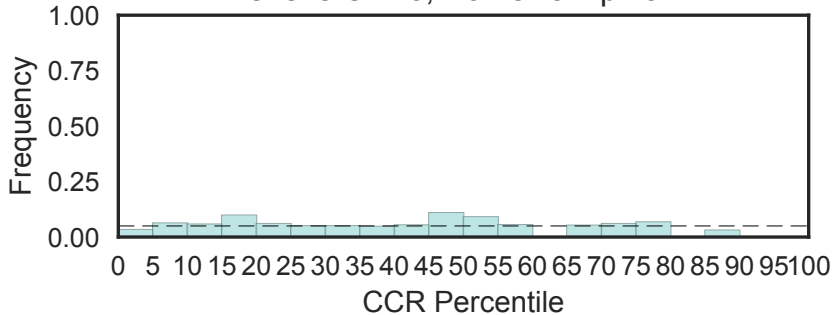



MHC-I family domain  
(MHC\_I\_3, N=8)

Fisher's OR: 0.189; Bonferroni p-val: 1

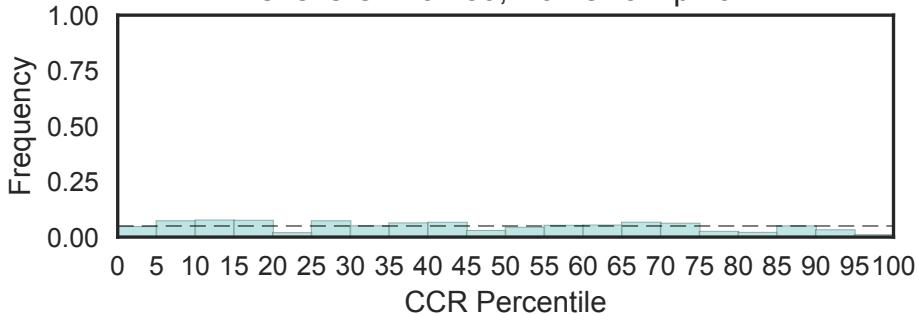

Class II MHC-associated invariant chain trimerisation domain  
(MHCassoc\_trimer, N=1)

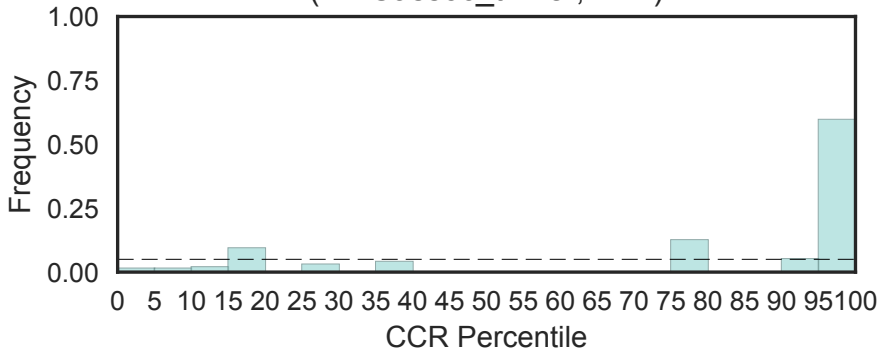

Mib\_herc2  
(MIB\_HERC2, N=6)  
Fisher's OR: 0; Bonferroni p-val: 1

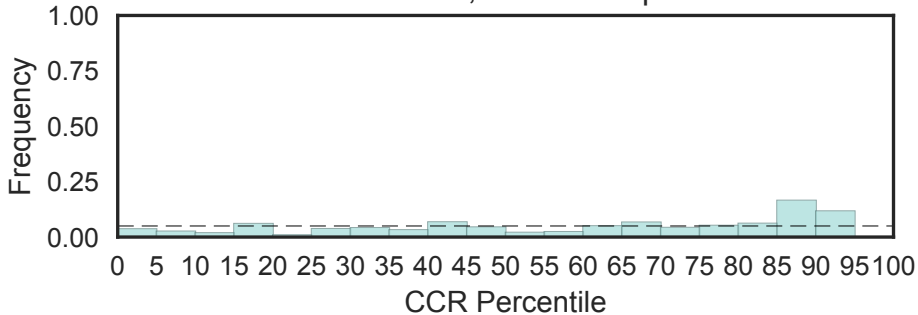

# Mitochondria-eating protein (MIEAP, N=1)

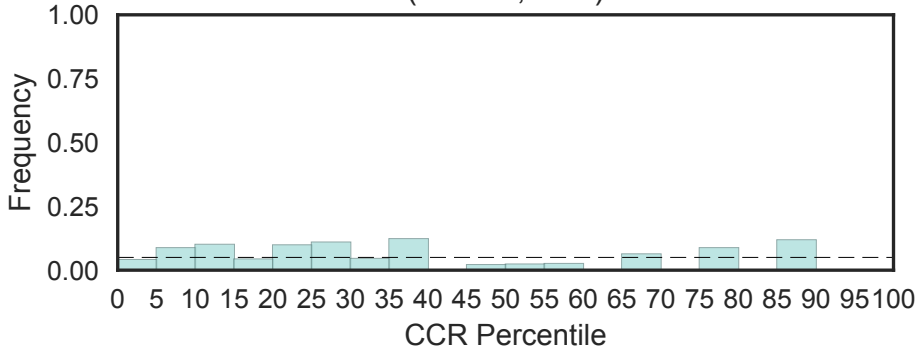

Macrophage migration inhibitory factor (MIF)  
(MIF, N=5)

Fisher's OR: 1.54; Bonferroni p-val: 1

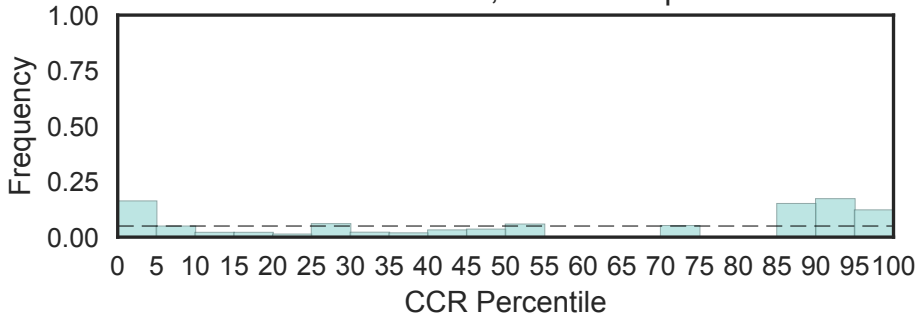

MIF4G domain  
(MIF4G, N=11)

Fisher's OR: 2.87; Bonferroni p-val: 0.43

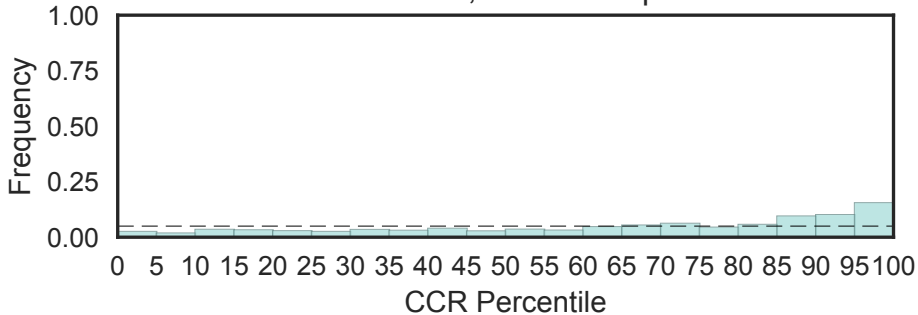

MIF4G like  
(MIF4G\_like, N=1)

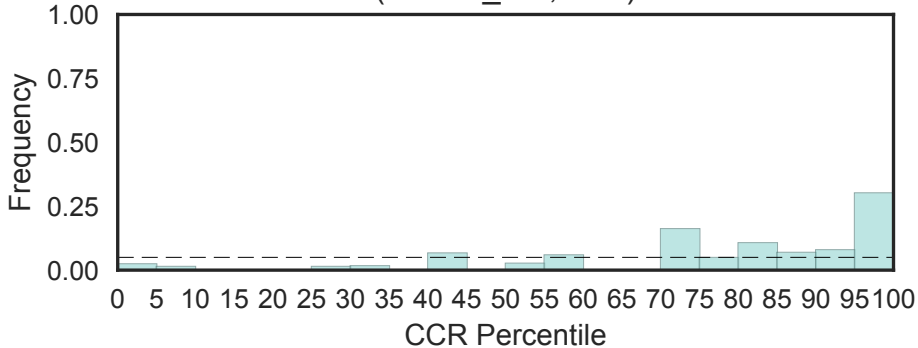

MIF4G like  
(MIF4G\_like\_2, N=1)

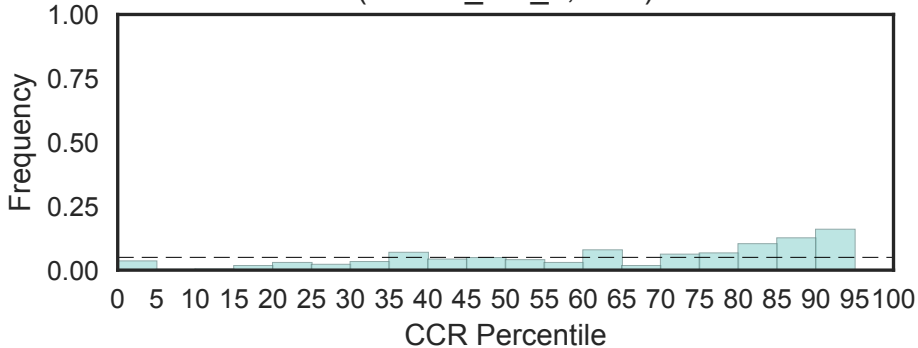



Wnt-binding factor required for Wnt secretion  
(MIG-14\_Wnt-bd, N=3)

Fisher's OR: 0.421; Bonferroni p-val: 1

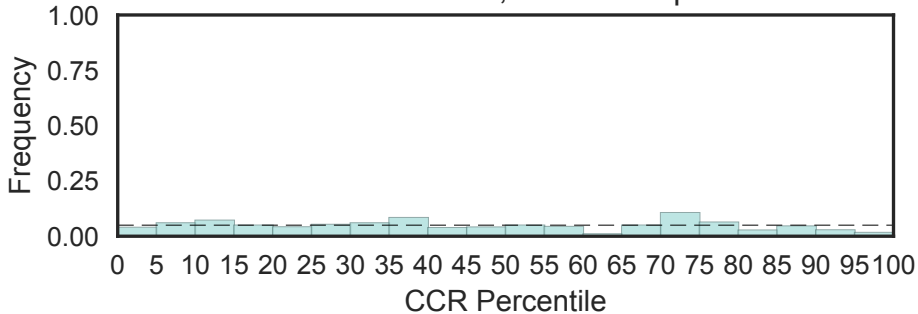

# Migration and invasion-inhibitory (MIIP, N=1)

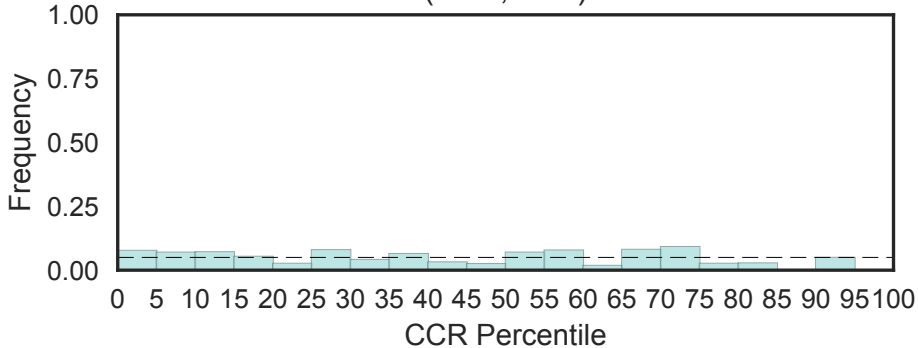

MINDY deubiquitinase  
(MINDY\_DUB, N=2)

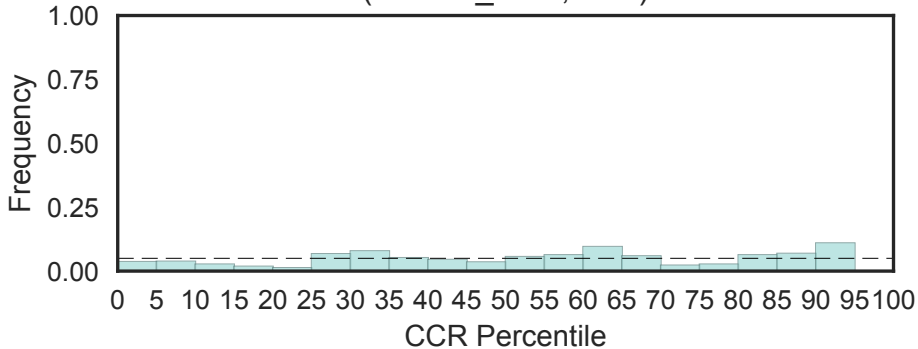

# Myo-inositol oxygenase (MIOX, N=1)

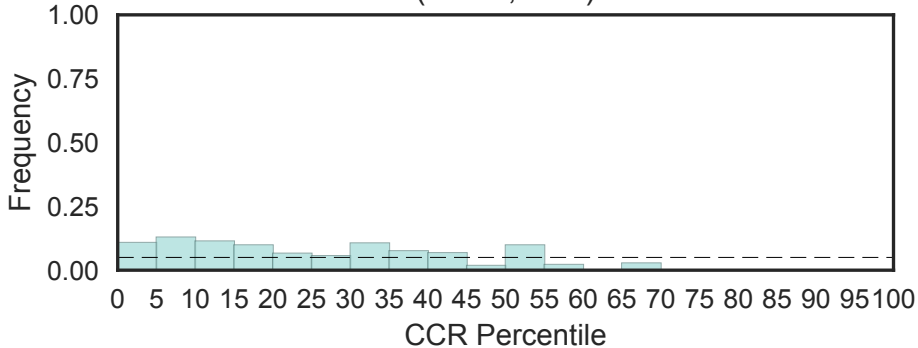

Major intrinsic protein  
(MIP, N=15)

Fisher's OR: 0.111; Bonferroni p-val: 1

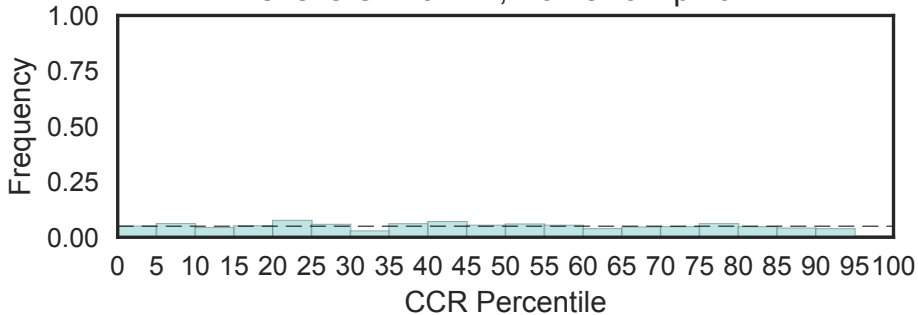

Microtubule-binding protein MIP-T3  
(MIP-T3, N=1)

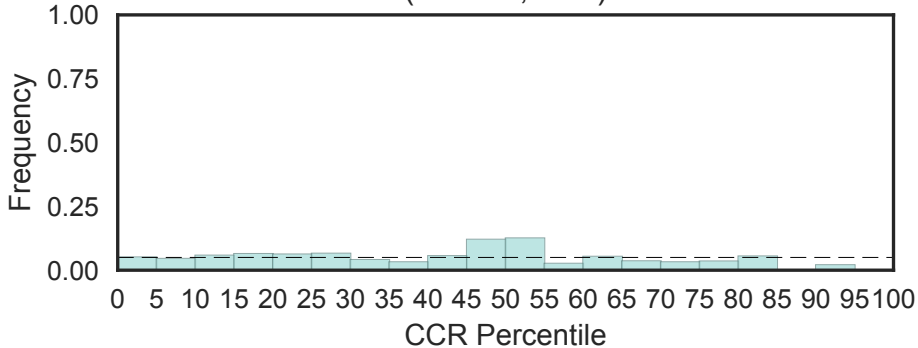

MIR domain  
(MIR, N=10)

Fisher's OR: 1.38; Bonferroni p-val: 1

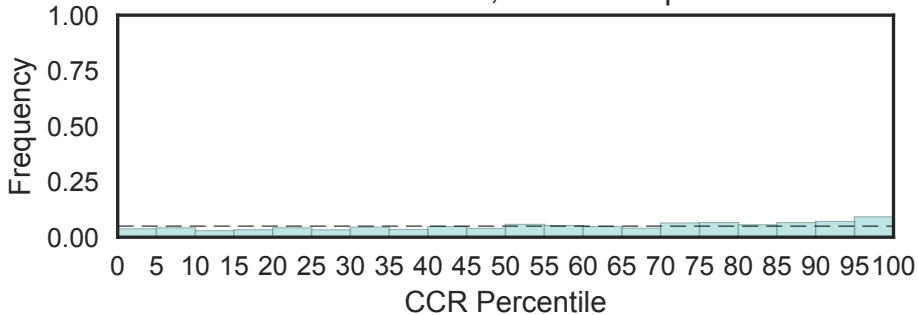

Mis12-Mtw1 protein family  
(MIS13, N=1)

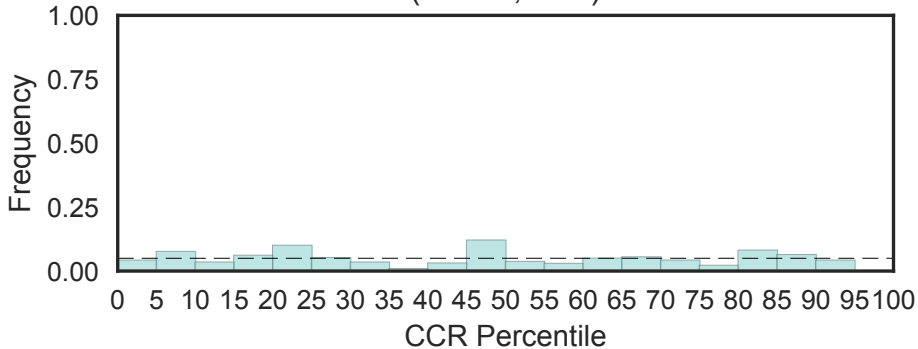



# MAPK-interacting and spindle-stabilising protein-like (MISS, N=1)

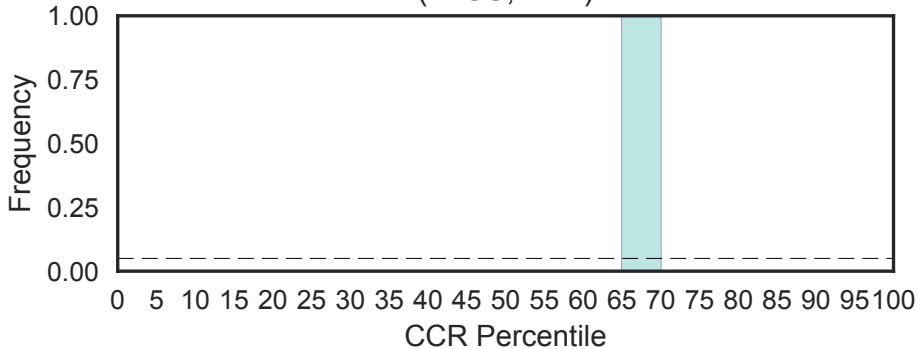

MIT (microtubule interacting and transport) domain  
(MIT, N=11)

Fisher's OR: 1.36; Bonferroni p-val: 1

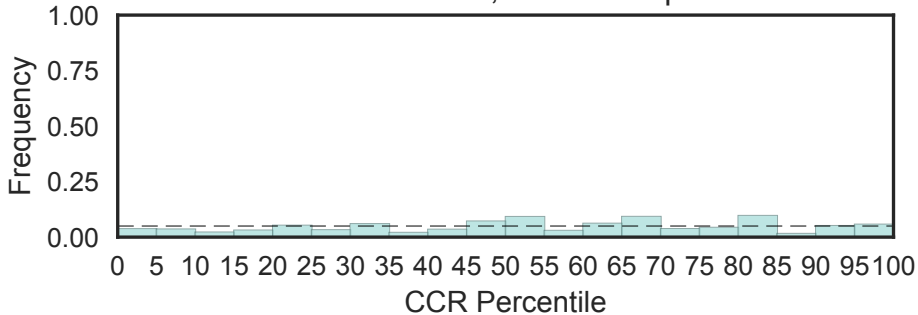

MITF/TFEB/TFEC/TFE3 N-terminus  
(MITF\_TFEB\_C\_3\_N, N=2)

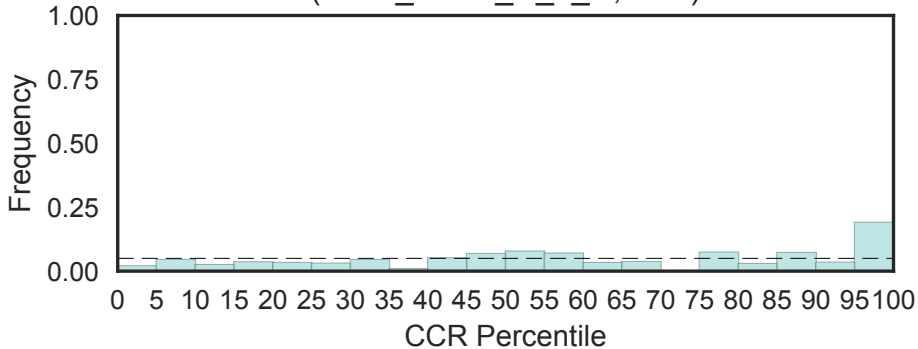

Phospholipase D-like domain at C-terminus of MIT  
(MIT\_C, N=1)

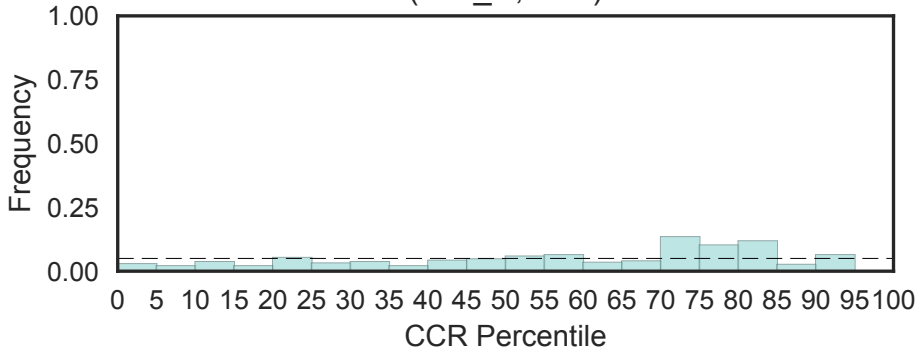

E3 ubiquitin-protein ligase makorin-1, C-terminal  
(MKRN1\_C, N=2)

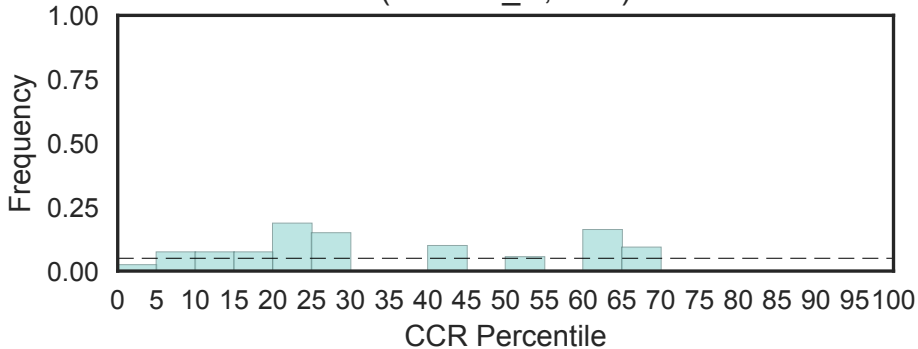

Protein melan-A  
(MLANA, N=1)

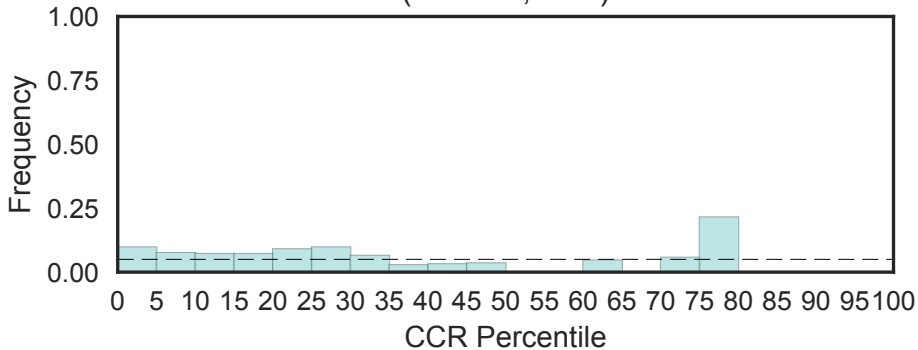

# Muscular LMNA-interacting protein (MLIP, N=2)

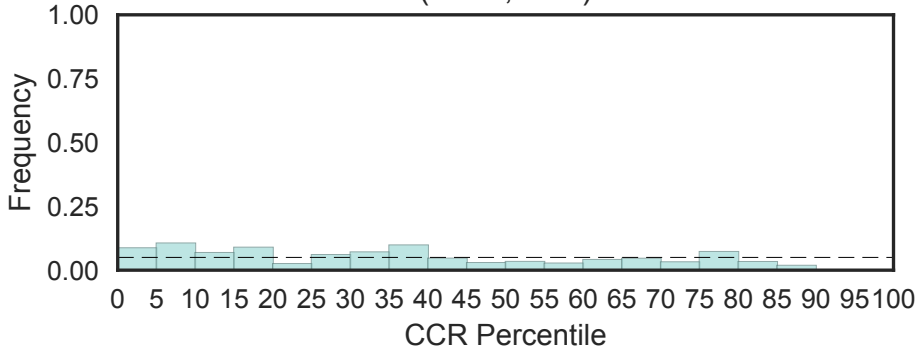

# Methylmalonic aciduria and homocystinuria type C family (MMACHC, N=1)

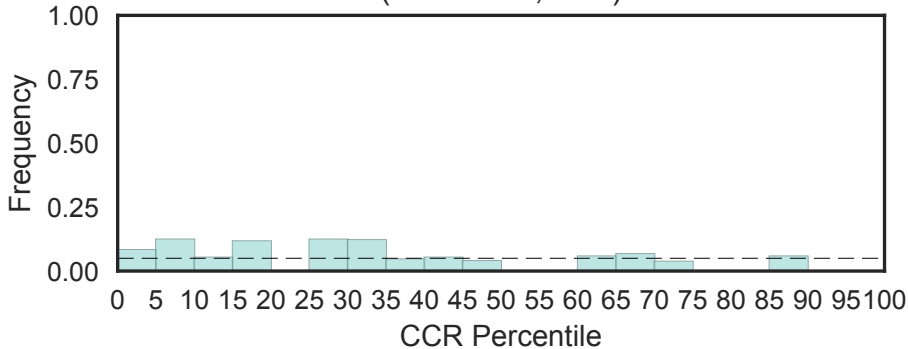



# Methylmalonic aciduria and homocystinuria type D protein (MMADHC, N=1)

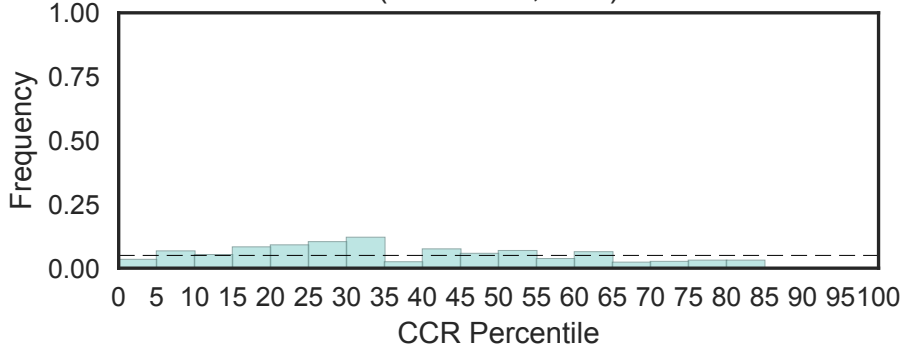

MMPL family  
(MMPL, N=5)

Fisher's OR: 0; Bonferroni p-val: 1

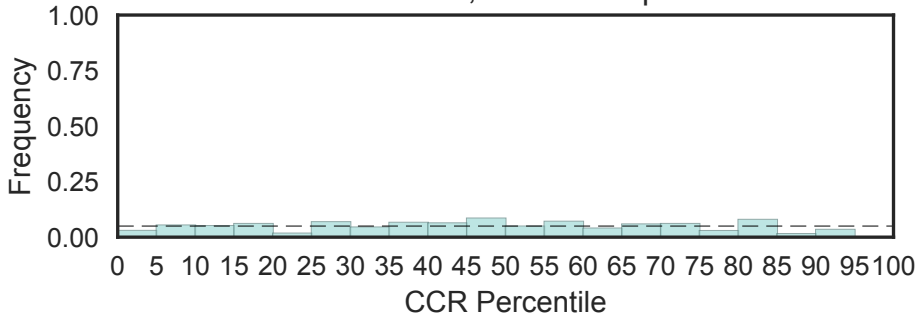

50S ribosome-binding GTPase  
(MMR\_HSR1, N=115)

Fisher's OR: 2.29; Bonferroni p-val: 1.25e-07

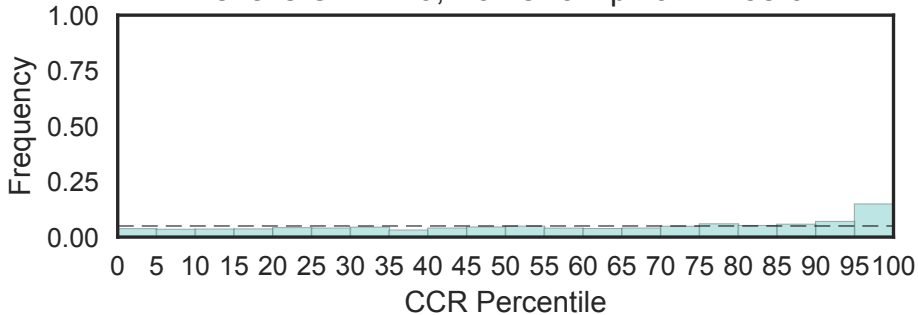

C-terminal region of MMR\_HSR1 domain  
(MMR\_HSR1\_Xtn, N=2)

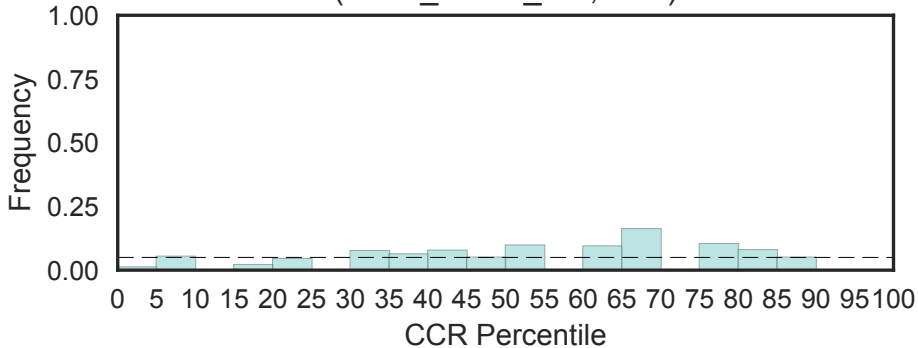

RNAPII transcription regulator C-terminal  
(MMS19\_C, N=1)

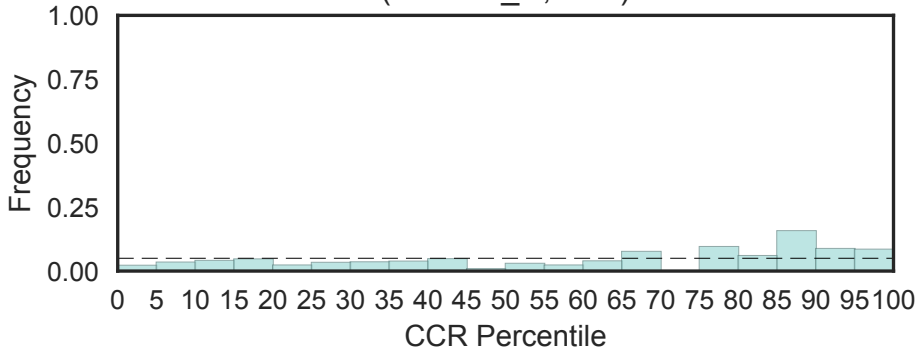

Dos2-interacting transcription regulator of RNA-Pol-II  
(MMS19\_N, N=1)

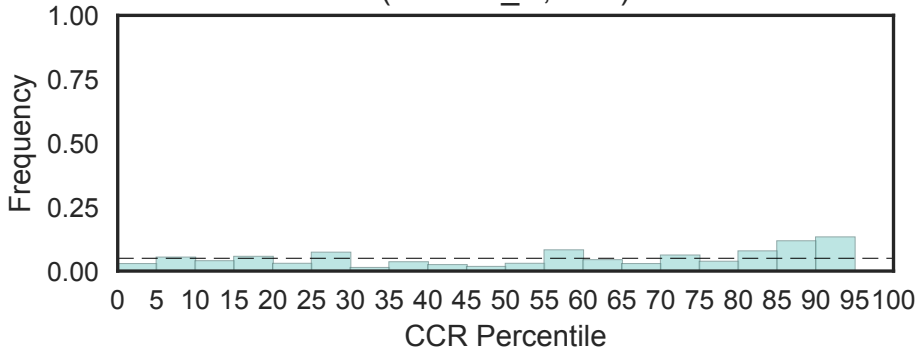

Mono-functional DNA-alkylating methyl methanesulfonate N-term  
(MMS1\_N, N=3)

Fisher's OR: 4.02; Bonferroni p-val: 0.0657

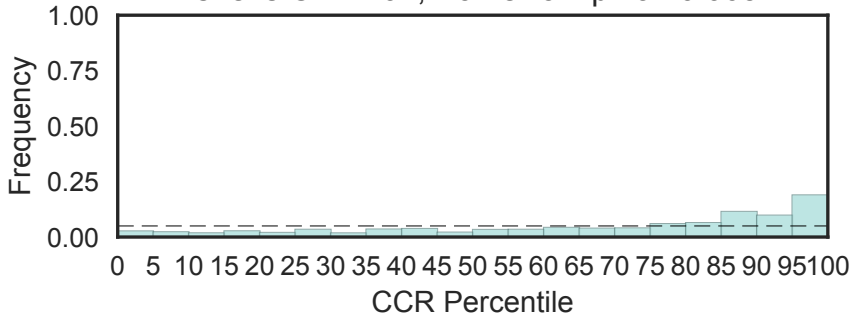

S-phase genomic integrity recombination mediator, C-terminal  
(MMS22L\_C, N=1)

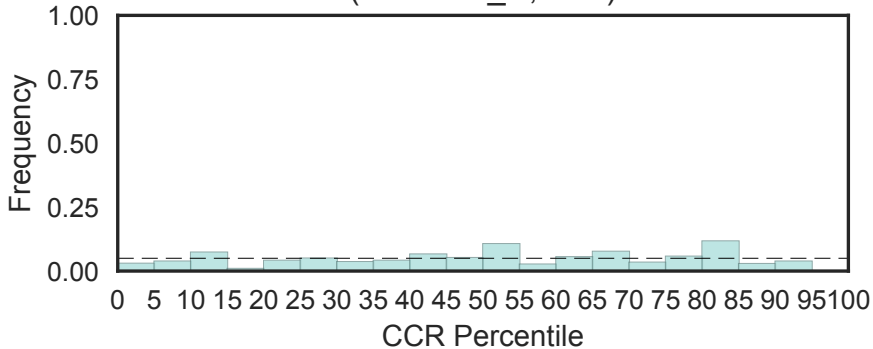



S-phase genomic integrity recombination mediator, N-terminal  
(MMS22L\_N, N=1)

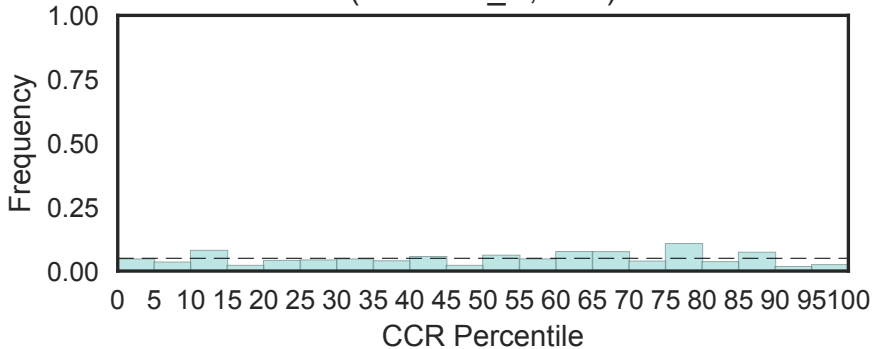

Methylmalonyl-CoA mutase  
(MM\_CoA\_mutase, N=1)

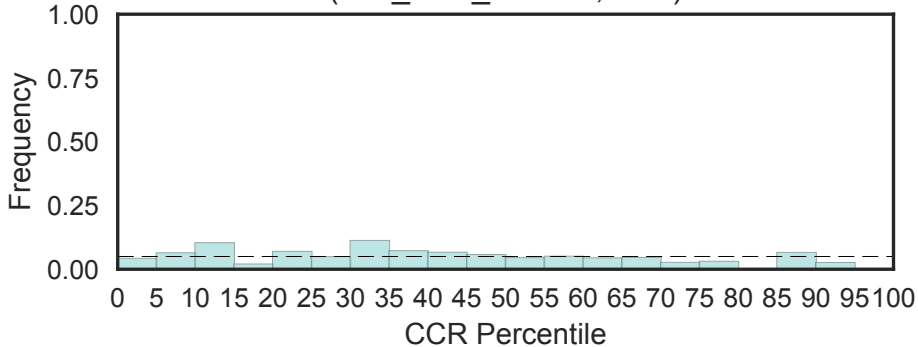

# Kinase phosphorylation protein (MMtag, N=1)

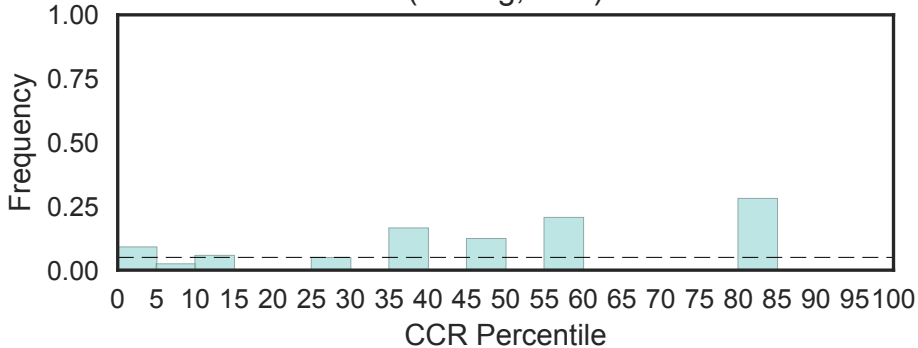

N terminus of Notch ligand  
(MNNL, N=5)

Fisher's OR: 5.32; Bonferroni p-val: 1

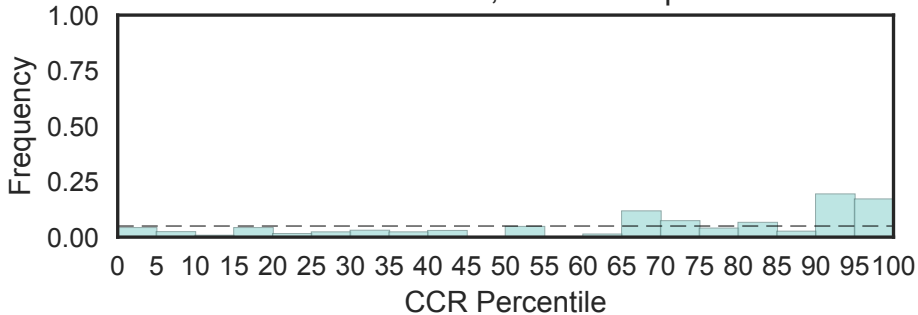

Protein moonraker  
(MNR, N=1)

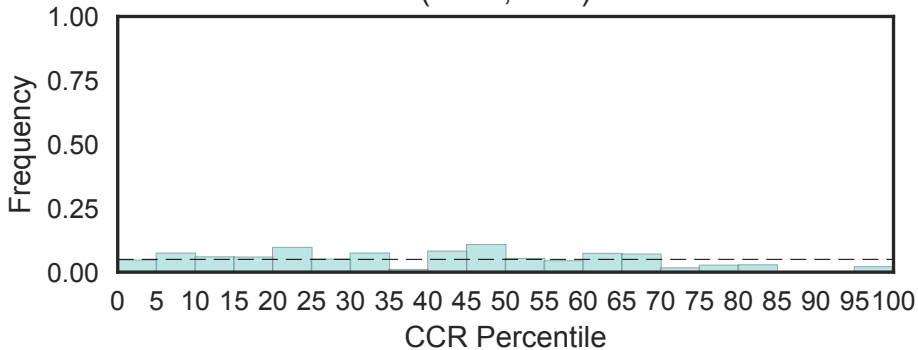

KH-like RNA-binding domain  
(MOEP19, N=5)

Fisher's OR: 0; Bonferroni p-val: 1

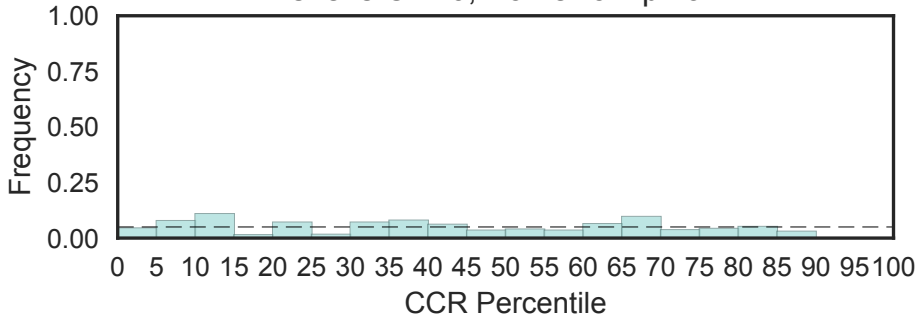

MOFRL family  
(MOFRL, N=1)

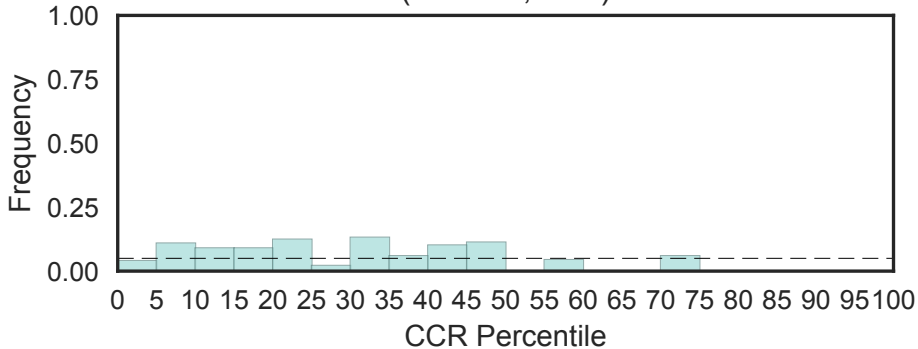

Cell morphogenesis C-terminal  
(MOR2-PAG1\_C, N=2)

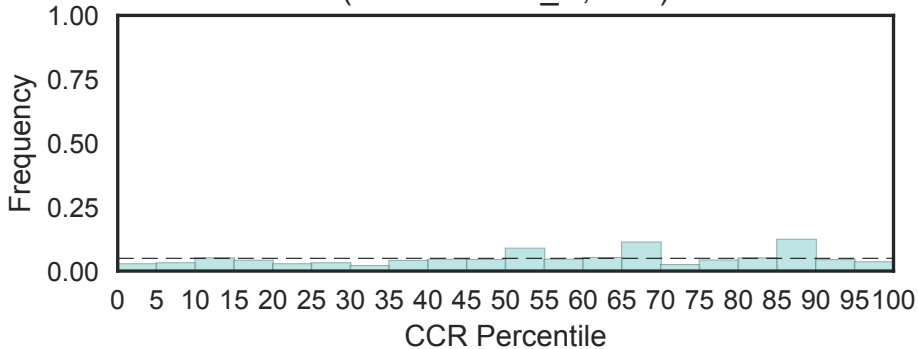



Cell morphogenesis N-terminal  
(MOR2-PAG1\_N, N=2)

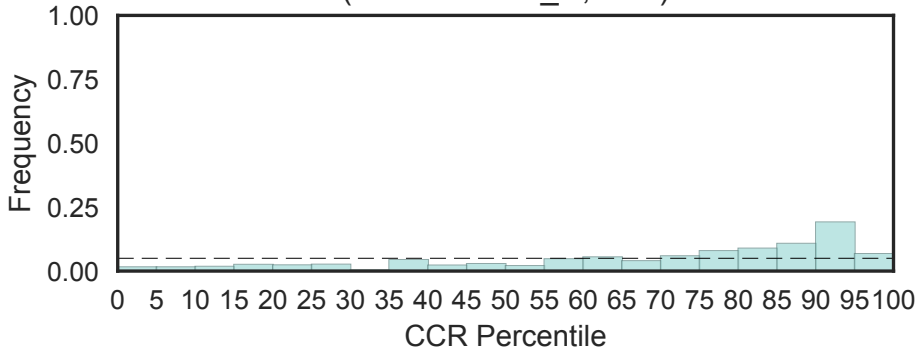

Cell morphogenesis central region  
(MOR2-PAG1\_mid, N=8)  
Fisher's OR: 1.15; Bonferroni p-val: 1

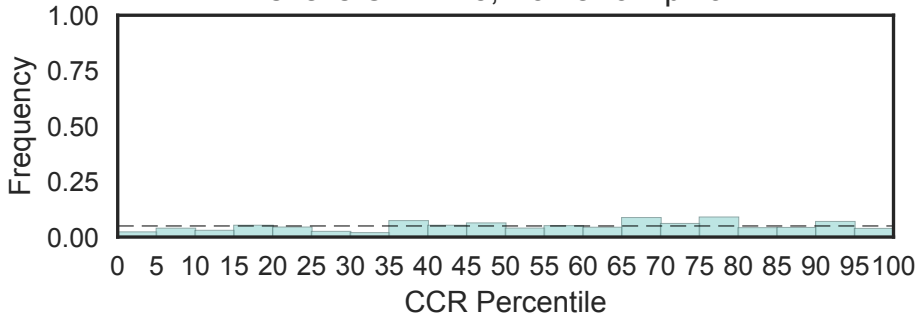

MORN repeat  
(MORN, N=90)

Fisher's OR: 1.1; Bonferroni p-val: 1

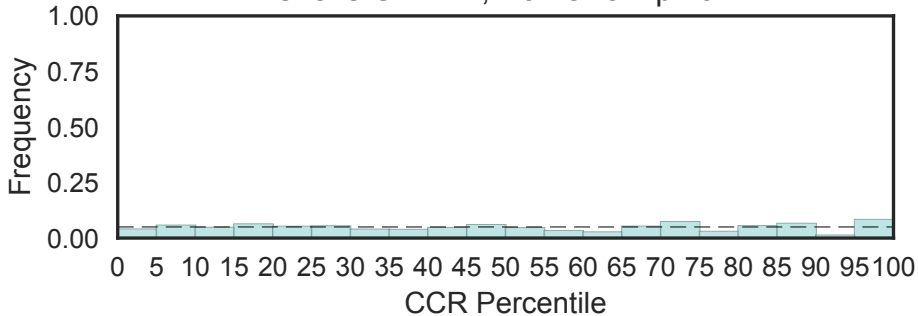

MORN repeat variant  
(MORN\_2, N=2)

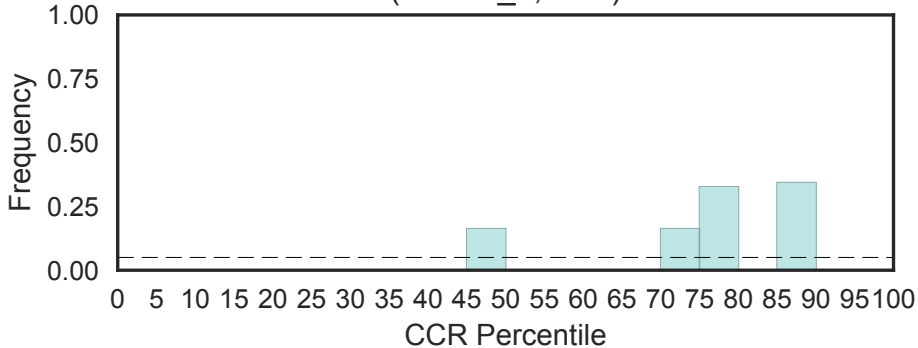

MOSC domain  
(MOSC, N=3)

Fisher's OR: 0; Bonferroni p-val: 1

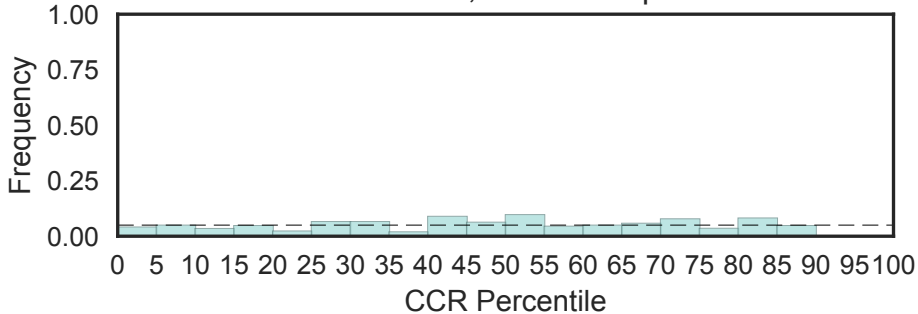

MOSC N-terminal beta barrel domain  
(MOSC\_N, N=3)

Fisher's OR: 0.879; Bonferroni p-val: 1

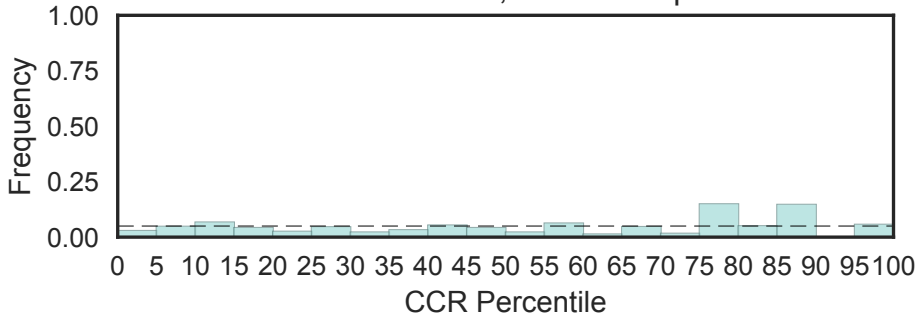

Mitotic-spindle organizing gamma-tubulin ring associated  
(MOZART1, N=1)

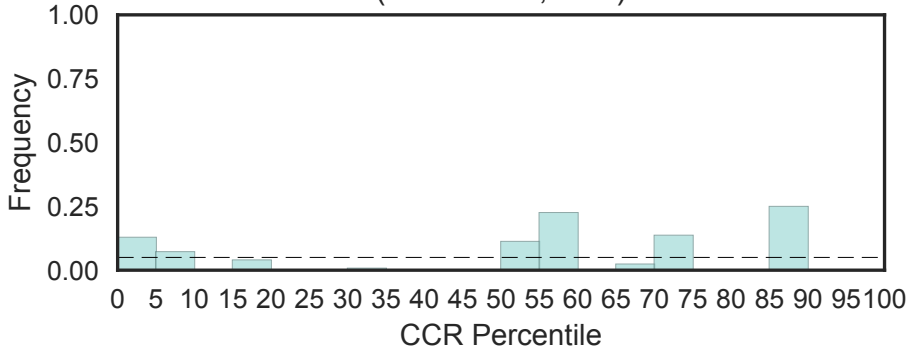

MOZ/SAS family  
(MOZ\_SAS, N=5)

Fisher's OR: 17.1; Bonferroni p-val: 1.82e-15

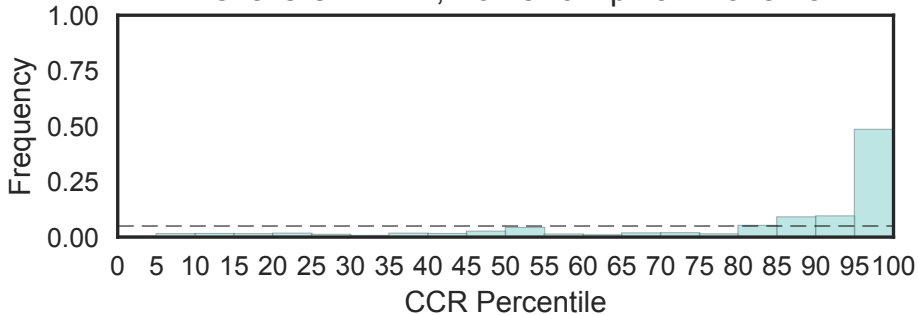



Uncharacterised protein family (UPF0041)  
(MPC, N=2)

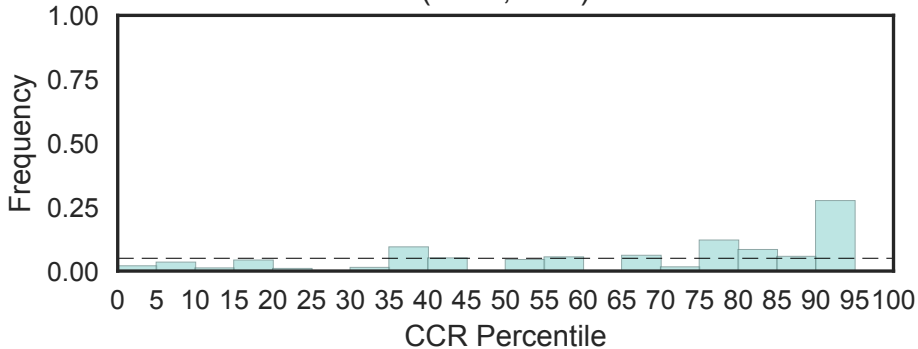

Unstructured region 10 on multiple PDZ protein  
(MPDZ\_u10, N=1)

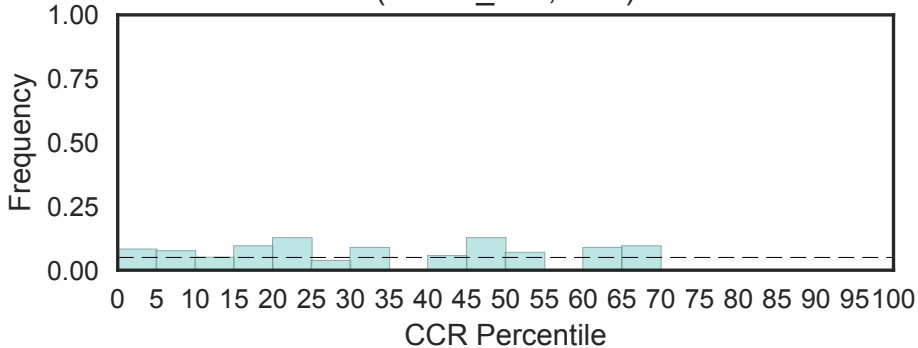

M-phase-specific PLK1-interacting protein  
(MPLKIP, N=1)

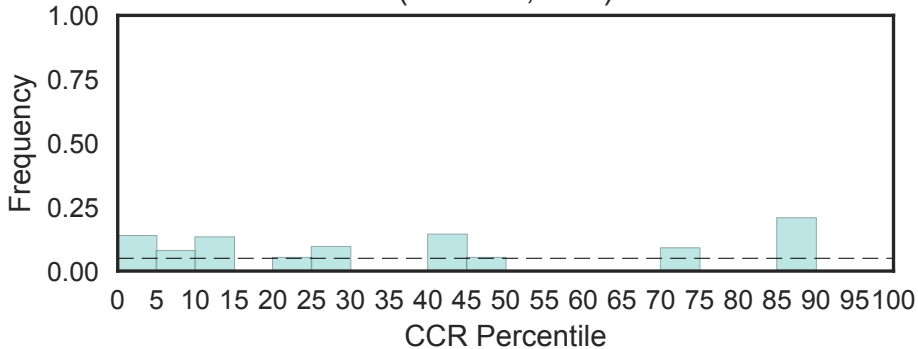

# M-phase phosphoprotein 6 (MPP6, N=1)

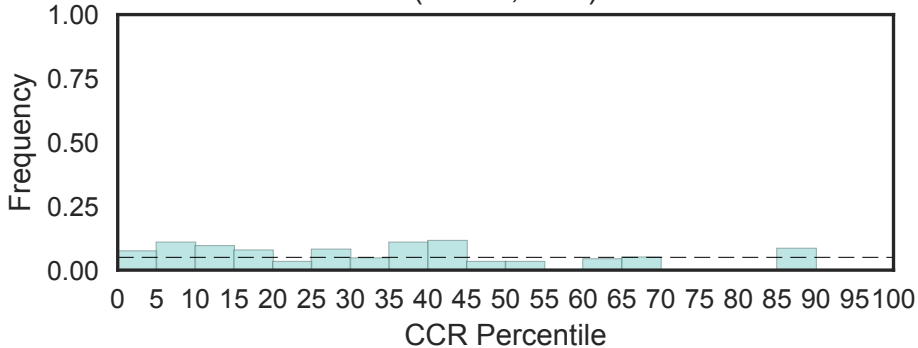

Melanocortin-2 receptor accessory protein family  
(MRAP, N=2)

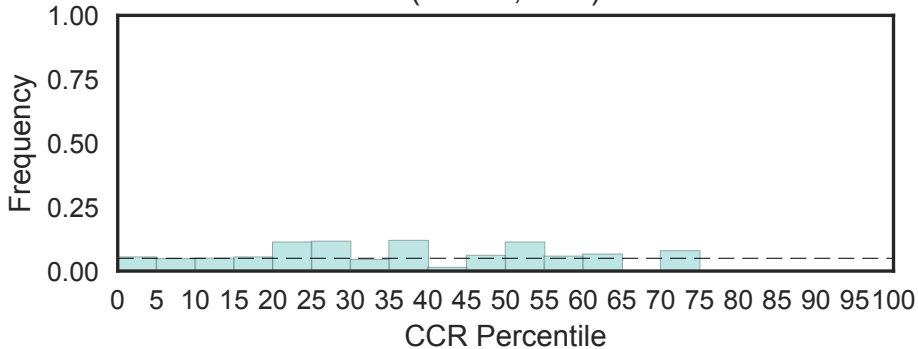

# Melanoregulin (MREG, N=1)

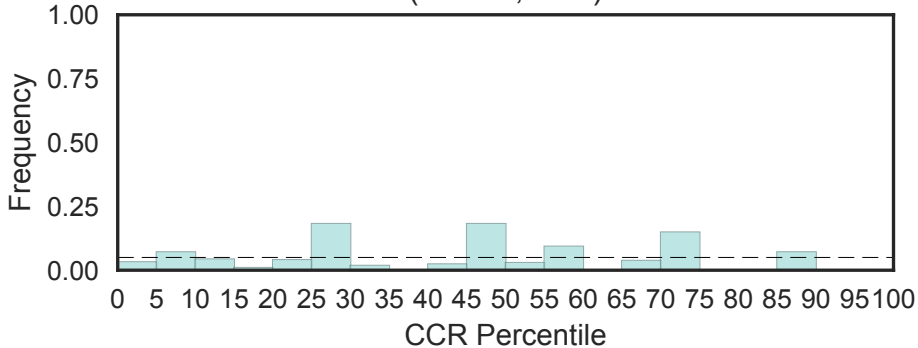

MORF4 family-associated protein1  
(MRFAP1, N=2)

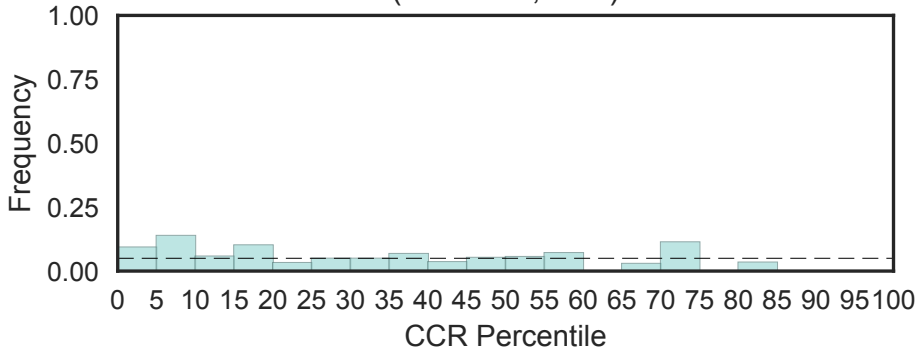

Myelin gene regulatory factor -C-terminal domain 1  
(MRF\_C1, N=1)

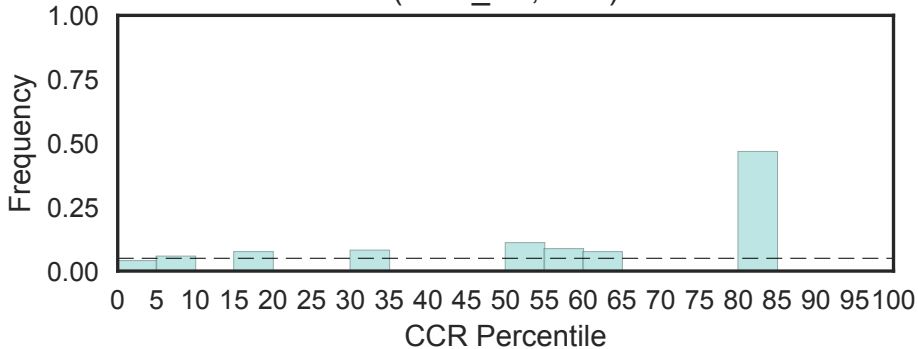



Myelin gene regulatory factor C-terminal domain 2  
(MRF\_C2, N=2)

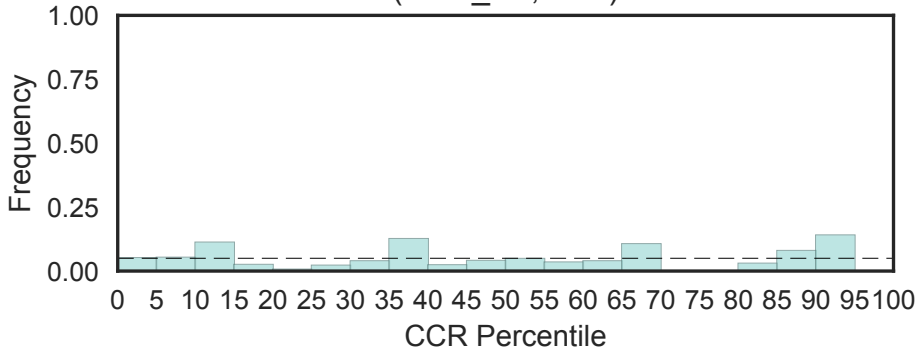

# MRG (MRG, N=1)

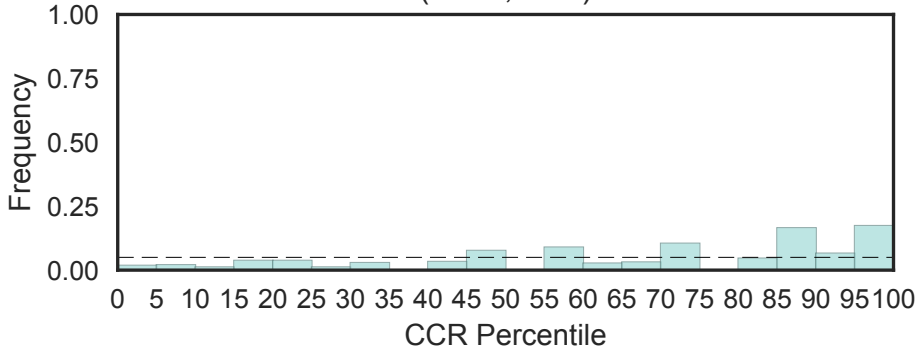

# Modulator of retrovirus infection (MRI, N=1)

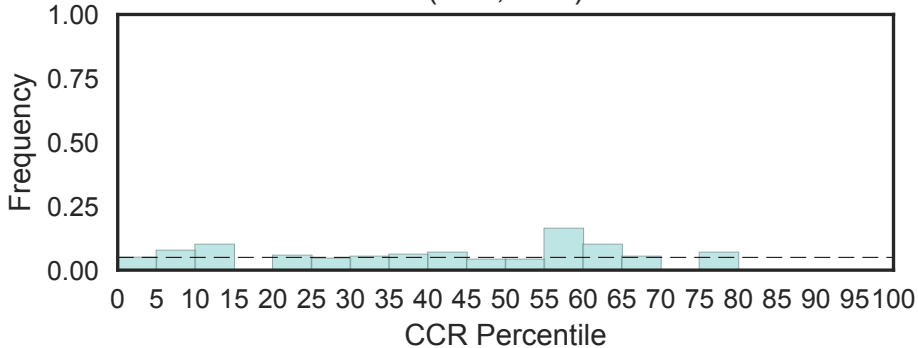

MRN-interacting protein  
(MRNIP, N=1)

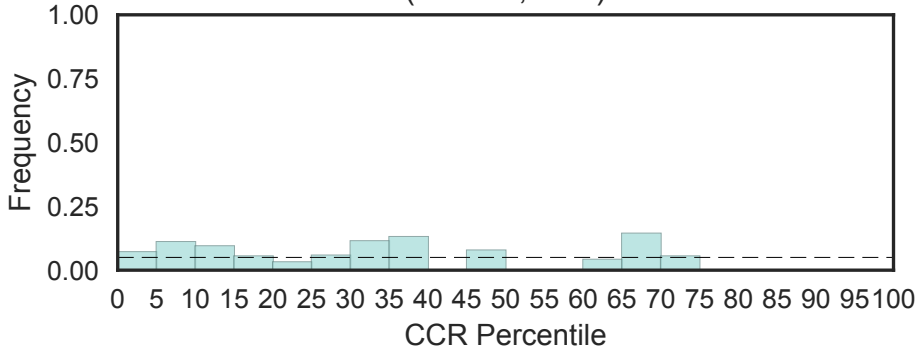

# Mitochondrial RNA binding protein MRP (MRP, N=2)

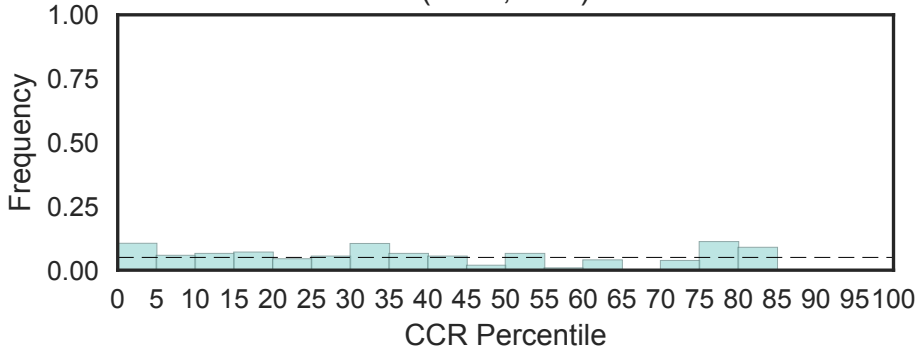

Mitochondrial ribosome protein 63  
(MRP-63, N=1)

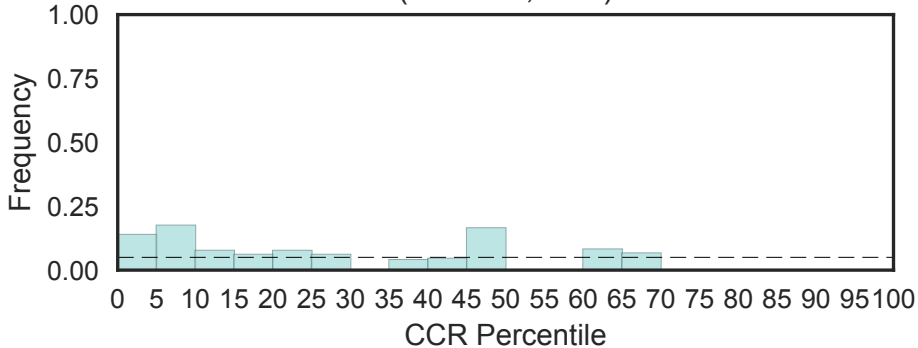

Mitochondrial ribosomal protein L27  
(MRP-L27, N=1)

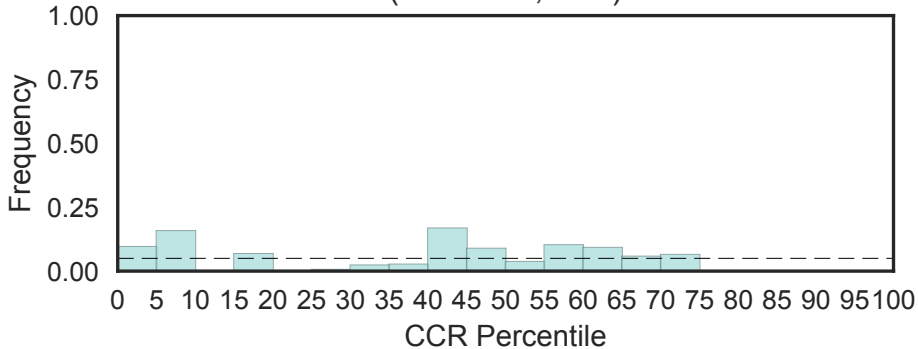

Mitochondrial ribosomal protein L28  
(MRP-L28, N=1)

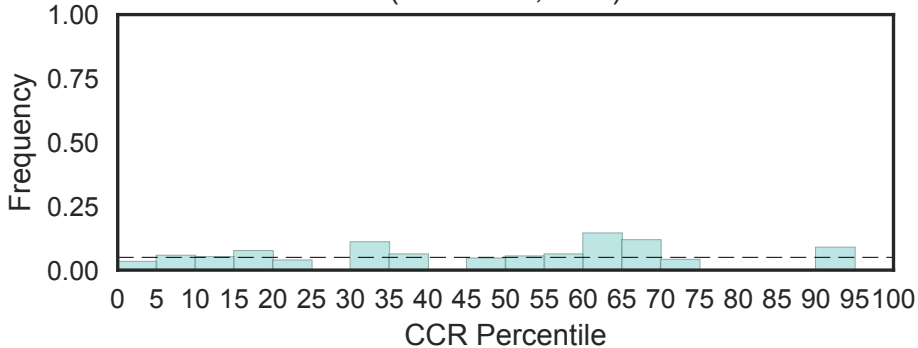



39S mitochondrial ribosomal protein L46  
(MRP-L46, N=1)

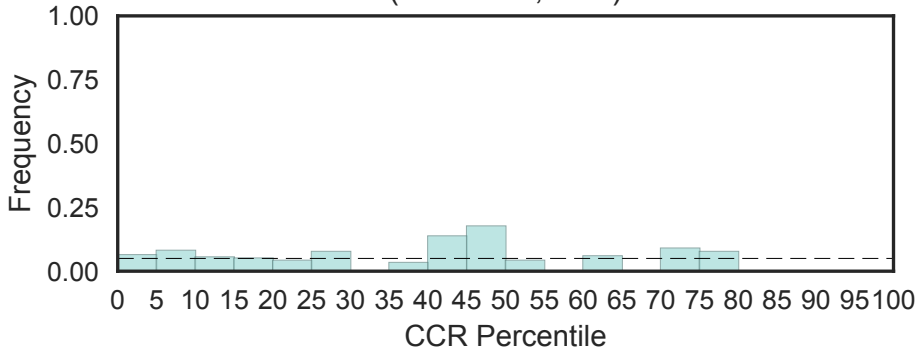

Mitochondrial 39-S ribosomal protein L47 (MRP-L47)  
(MRP-L47, N=1)

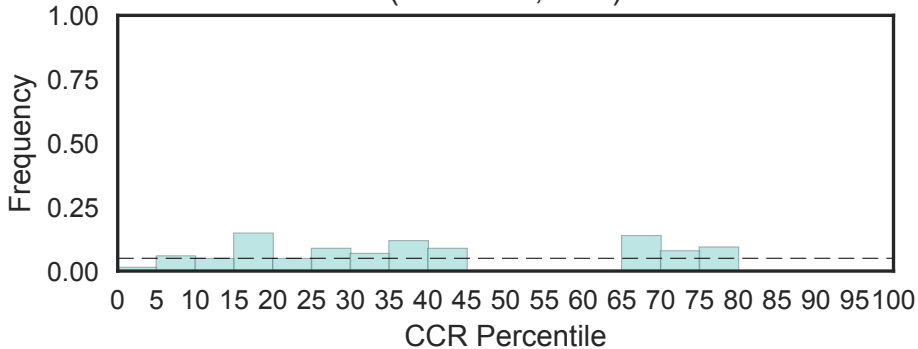

Mitochondrial ribosomal subunit  
(MRP-L51, N=1)

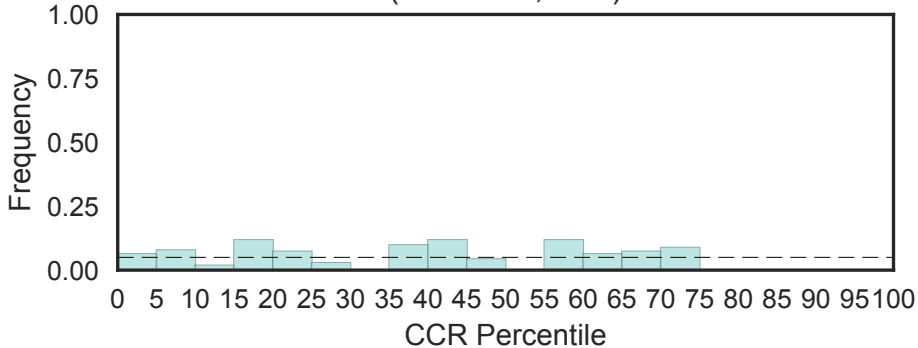

Mitochondrial 28S ribosomal protein S22  
(MRP-S22, N=2)

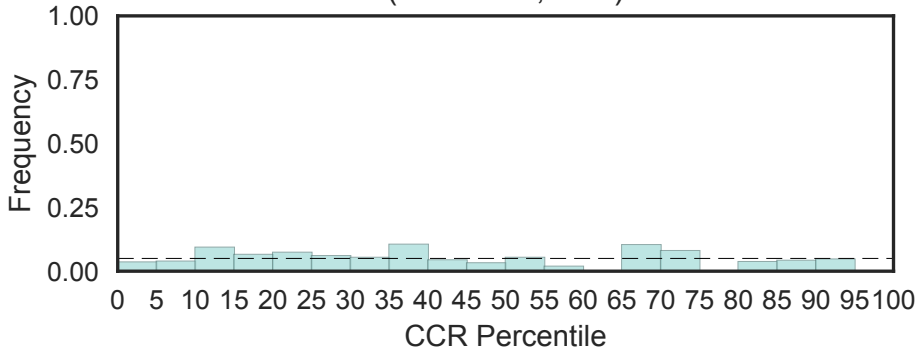

Mitochondrial ribosomal protein S23  
(MRP-S23, N=1)

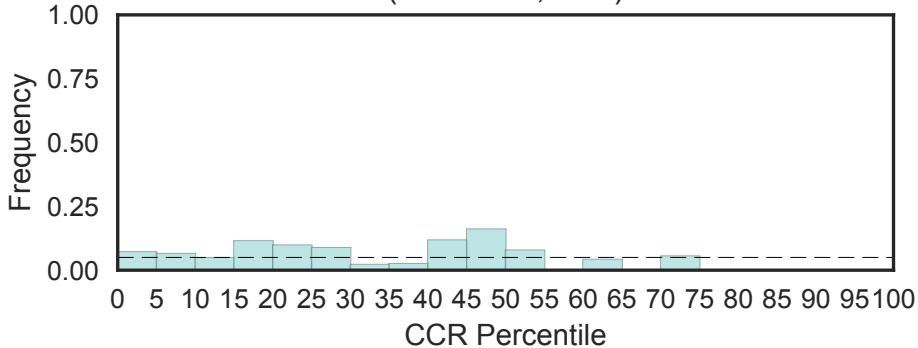

Mitochondrial ribosome subunit S24  
(MRP-S24, N=2)

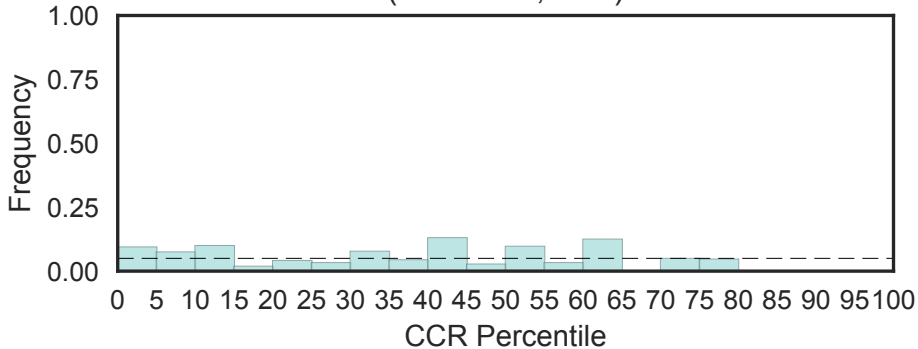

Mitochondrial ribosome subunit S26  
(MRP-S26, N=1)

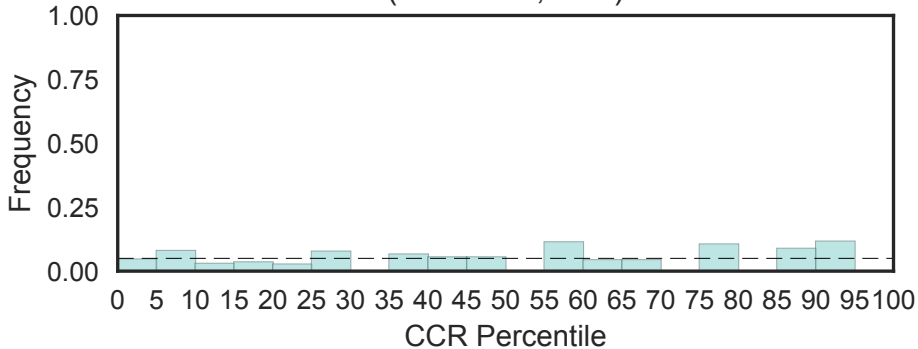

Mitochondrial 28S ribosomal protein S27  
(MRP-S27, N=2)

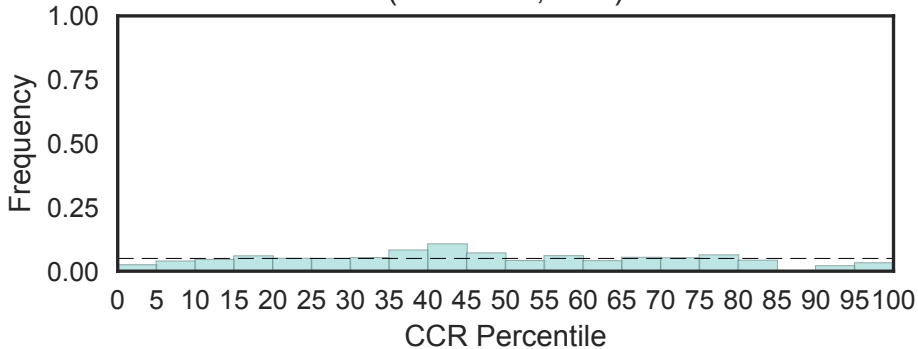



Mitochondrial ribosomal subunit protein  
(MRP-S28, N=1)

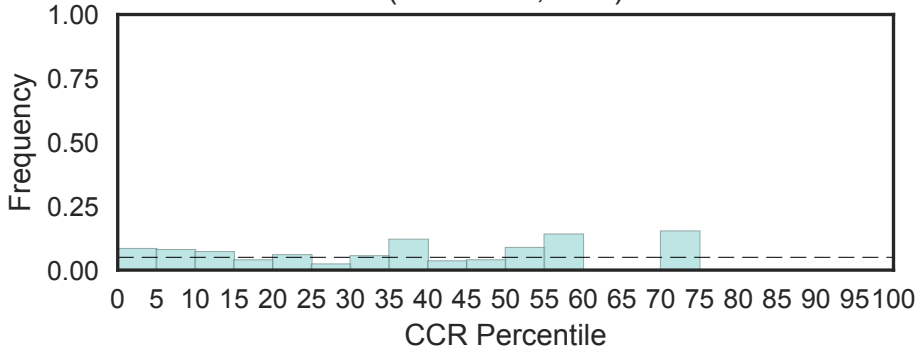

Mitochondrial 28S ribosomal protein S31  
(MRP-S31, N=1)

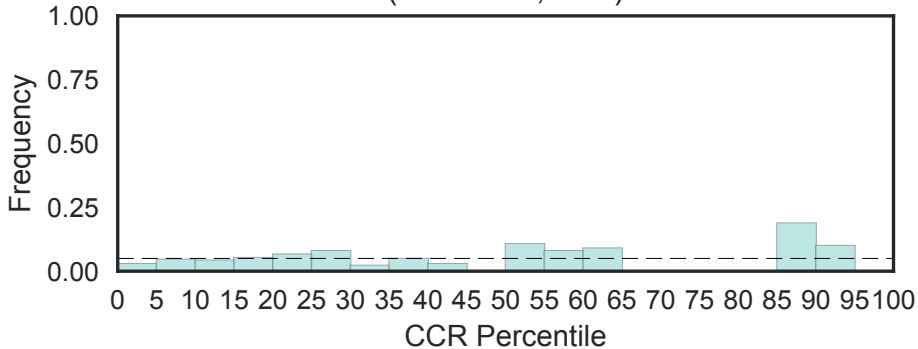

Mitochondrial 28S ribosomal protein S32  
(MRP-S32, N=1)

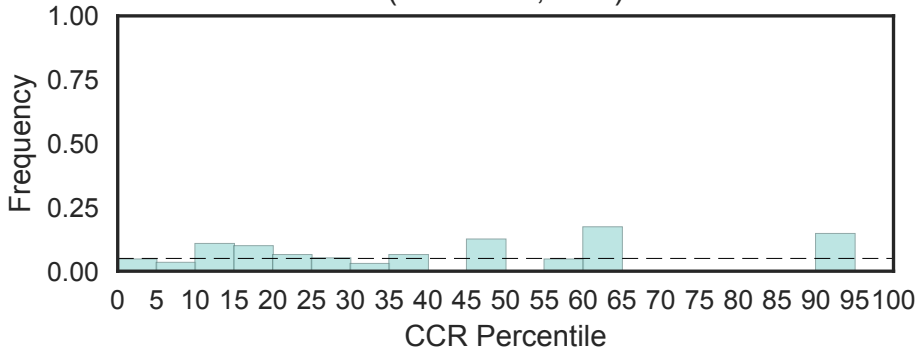

Mitochondrial ribosomal subunit S27  
(MRP-S33, N=1)

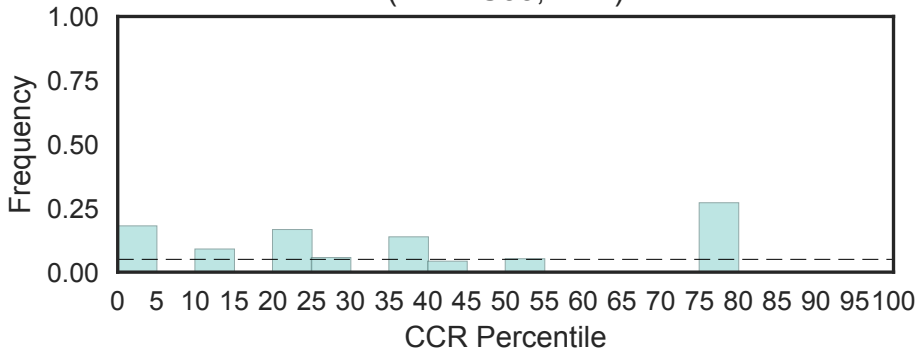

Mitochondrial 28S ribosomal protein S34  
(MRP-S34, N=1)

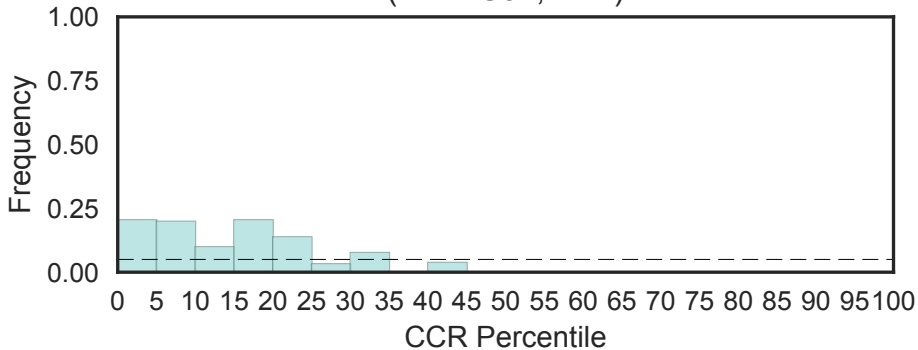

Mitochondrial ribosomal protein MRP-S35  
(MRP-S35, N=2)

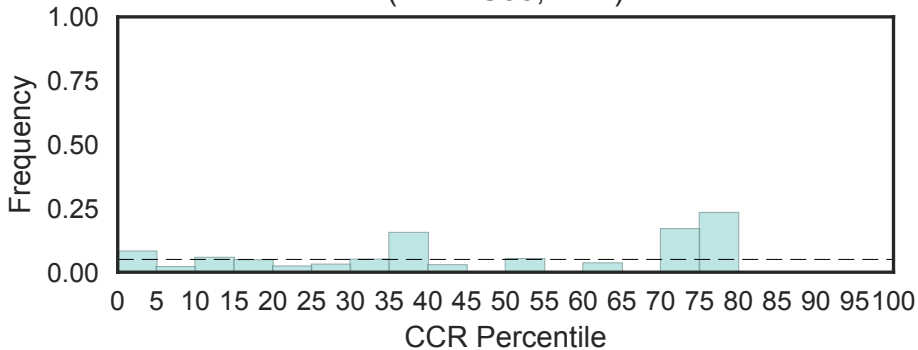

39S ribosomal protein L53/MRP-L53  
(MRP\_L53, N=1)

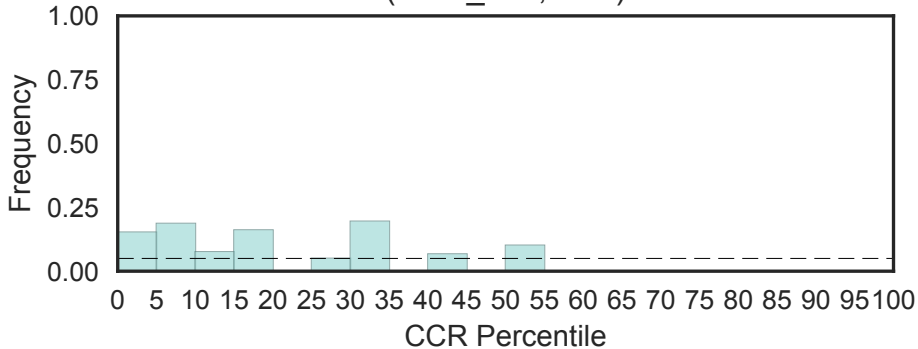

MRVI1 protein  
(MRVI1, N=2)

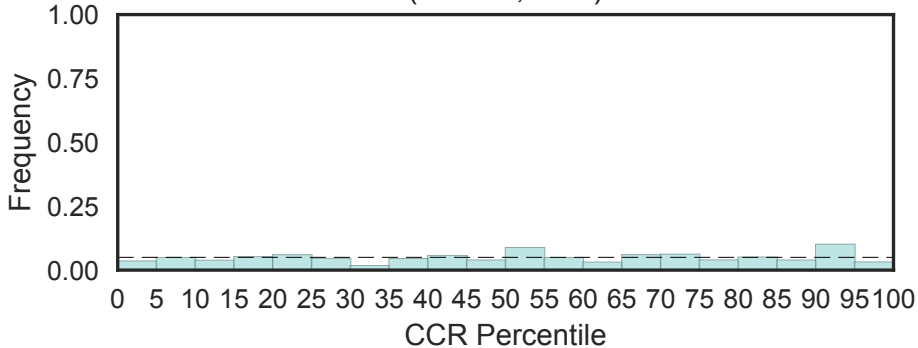



Enolase C-terminal domain-like  
(MR\_MLE\_C, N=4)

Fisher's OR: 0; Bonferroni p-val: 1

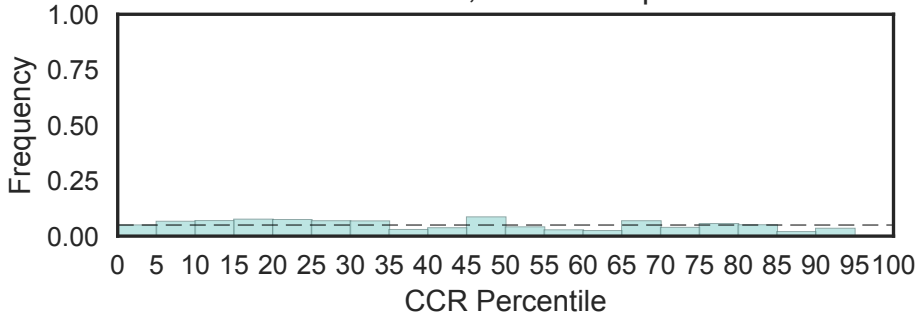

Mandelate racemase / muconate lactonizing enzyme, N-terminal domain  
(MR\_MLE\_N, N=1)

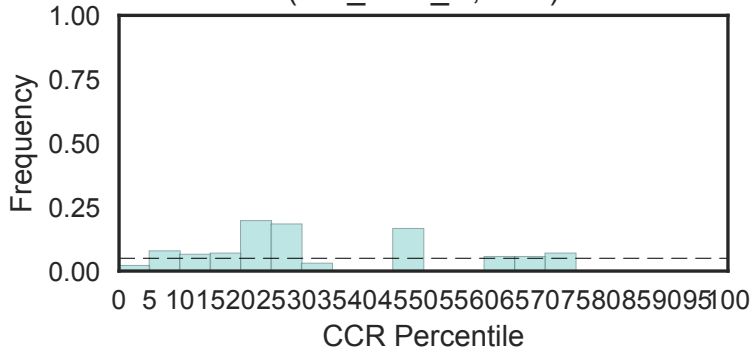

Man1-Src1p-C-terminal domain  
(MSC, N=3)

Fisher's OR: 0; Bonferroni p-val: 1

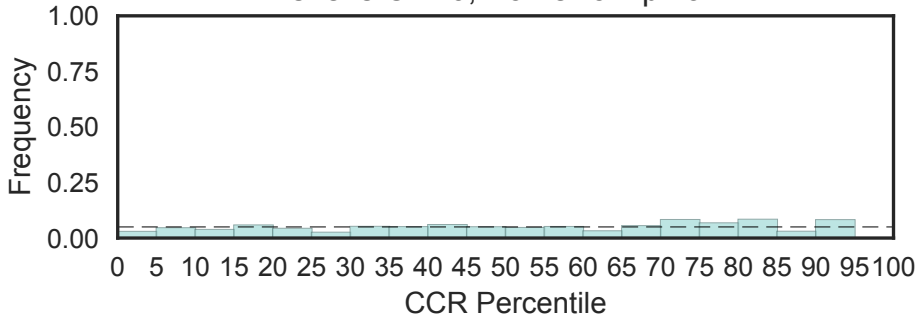

Dimerisation domain of Male-specific-Lethal 1  
(MSL1\_dimer, N=1)

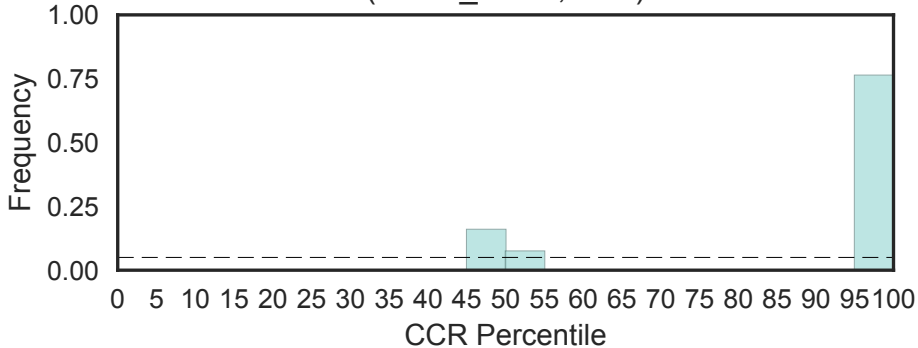

CXC domain of E3 ubiquitin-protein ligase MSL2  
(MSL2-CXC, N=1)

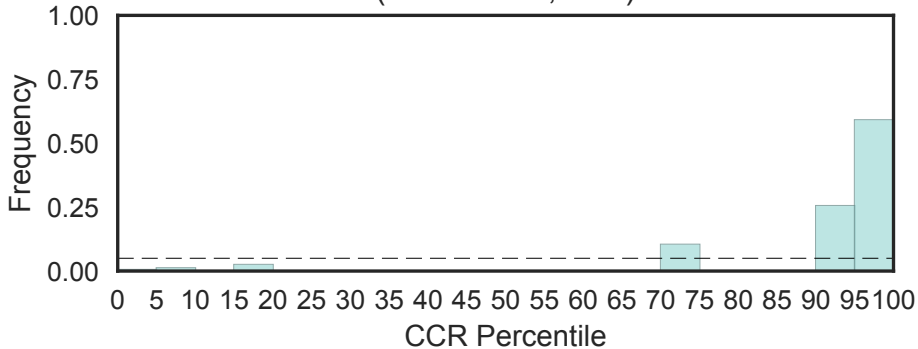

Microtubule-binding stalk of dynein motor  
(MT, N=15)

Fisher's OR: 0.727; Bonferroni p-val: 1

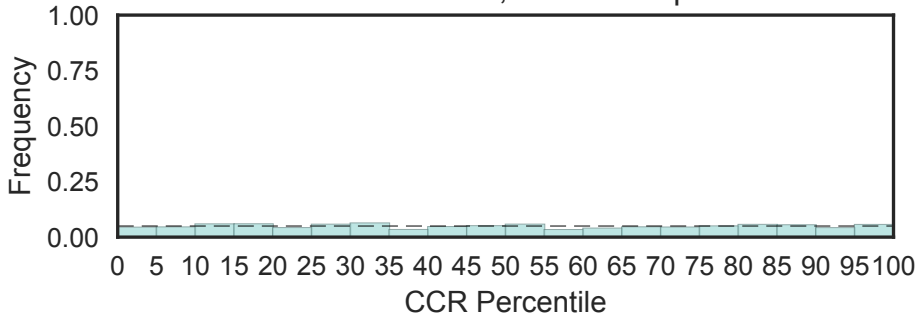

MT-A70  
(MT-A70, N=3)

Fisher's OR: 3.2; Bonferroni p-val: 1

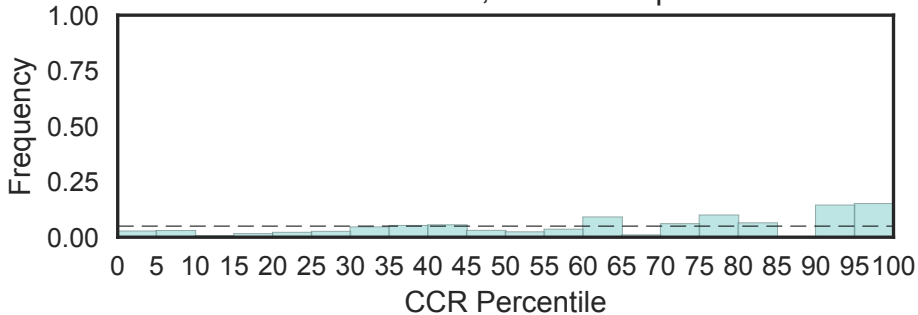

# Mitochondrial ABC-transporter N-terminal five TM region (MTABC\_N, N=1)

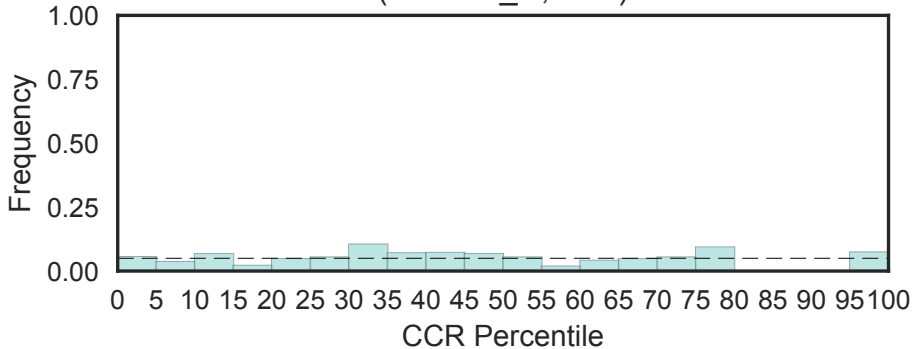



MTA R1 domain  
(MTA\_R1, N=4)

Fisher's OR: 1.05; Bonferroni p-val: 1

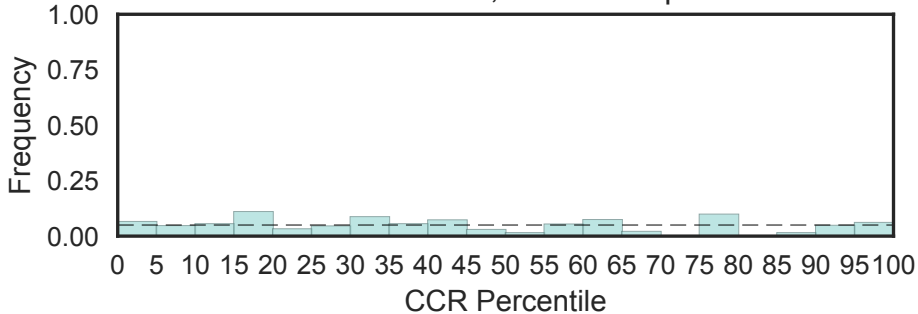

MDM2-binding  
(MTBP\_C, N=1)

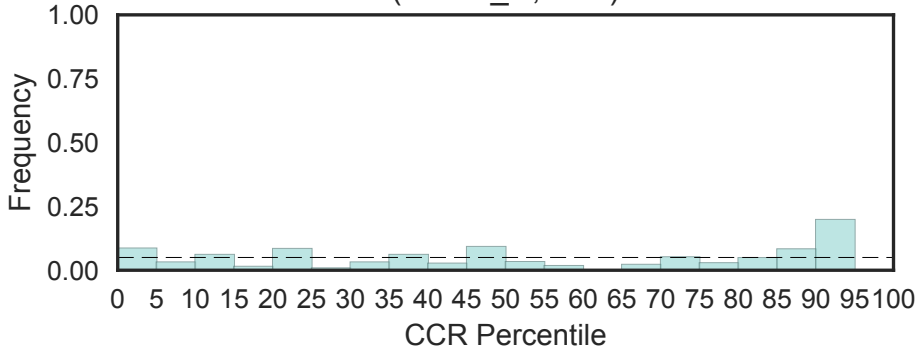

MDM2-binding  
(MTBP\_N, N=1)

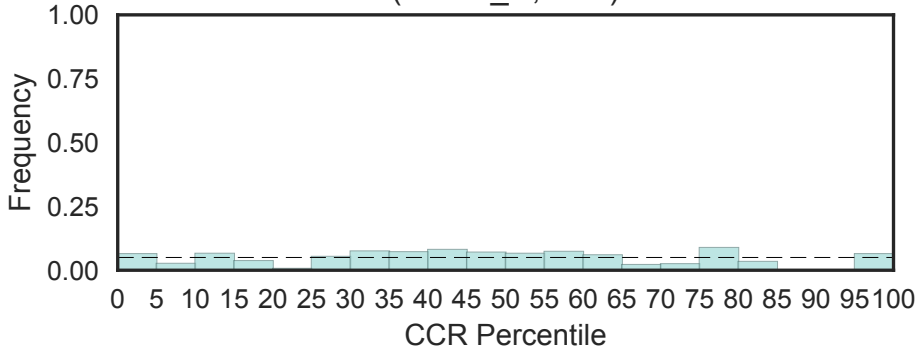

MDM2-binding  
(MTBP\_mid, N=1)

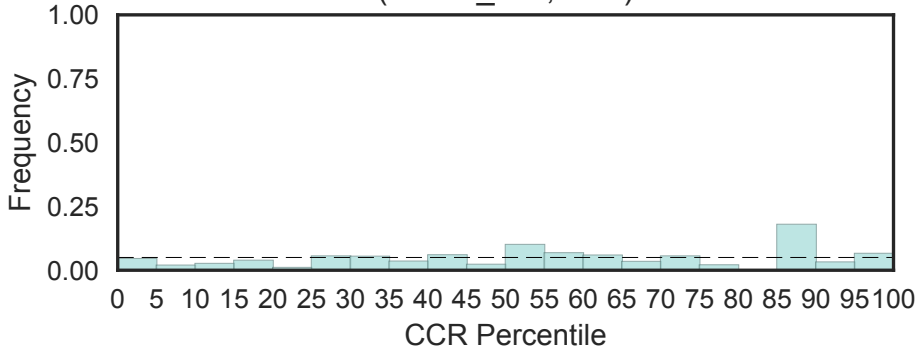

# Methylenetetrahydrofolate reductase (MTHFR, N=1)

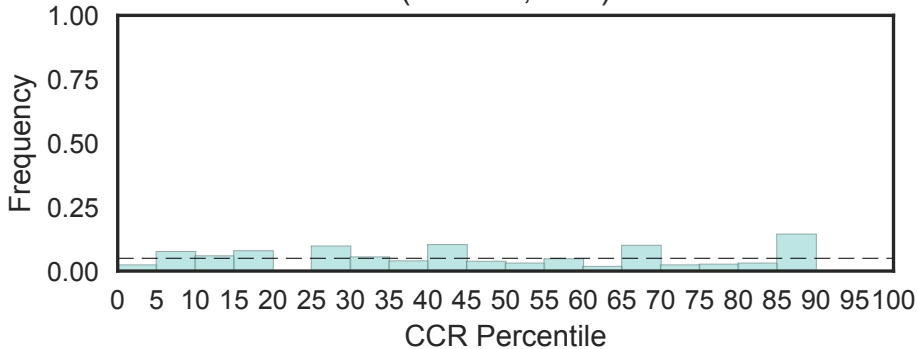

Mitochondrial 18 KDa protein (MTP18)  
(MTP18, N=4)

Fisher's OR: 0; Bonferroni p-val: 1

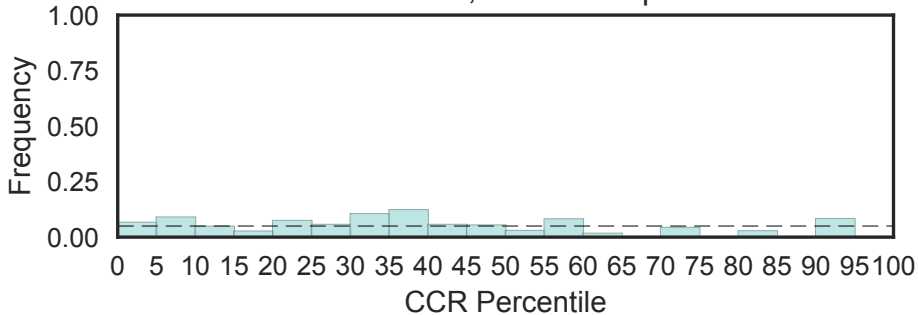

Methyltransferase small domain  
(MTS, N=13)

Fisher's OR: 1.05; Bonferroni p-val: 1

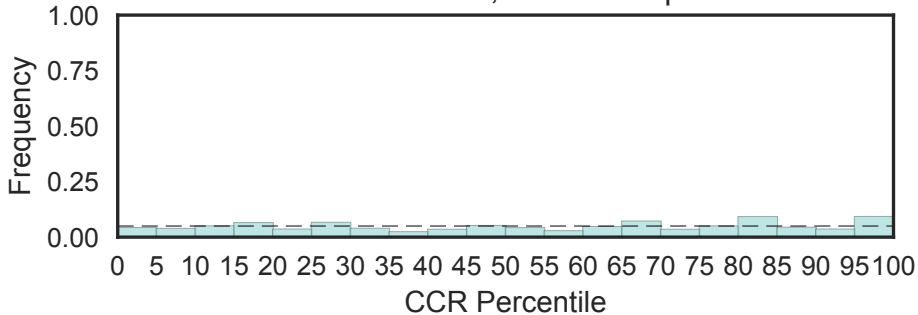

Shoulder domain  
(MVP\_shoulder, N=1)

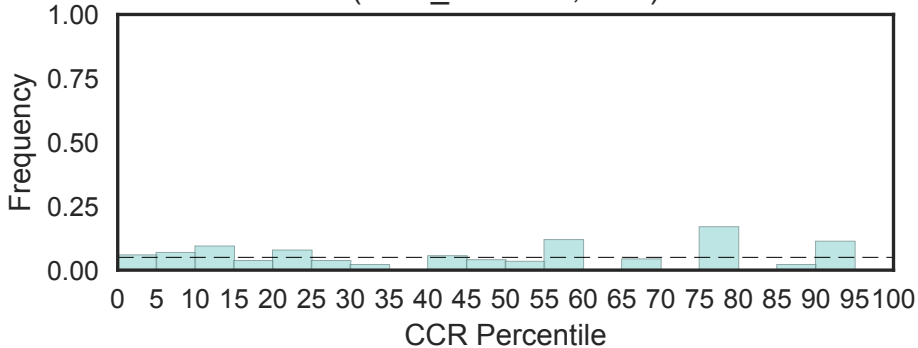



MYCBP-associated protein family  
(MYCBPAP, N=1)

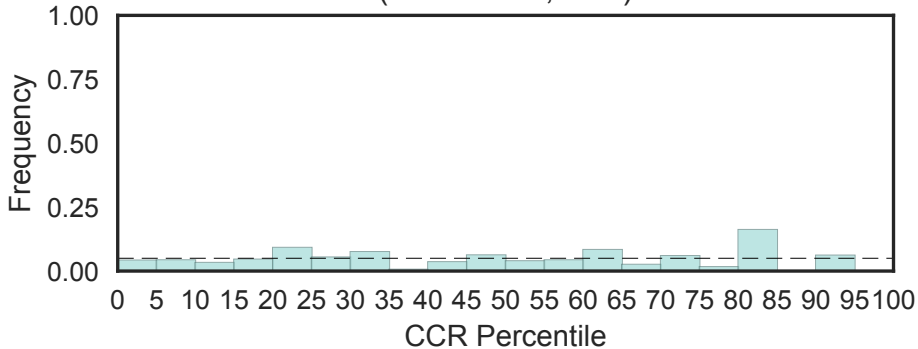

Myeloma-overexpressed-like  
(MYEOV2, N=1)

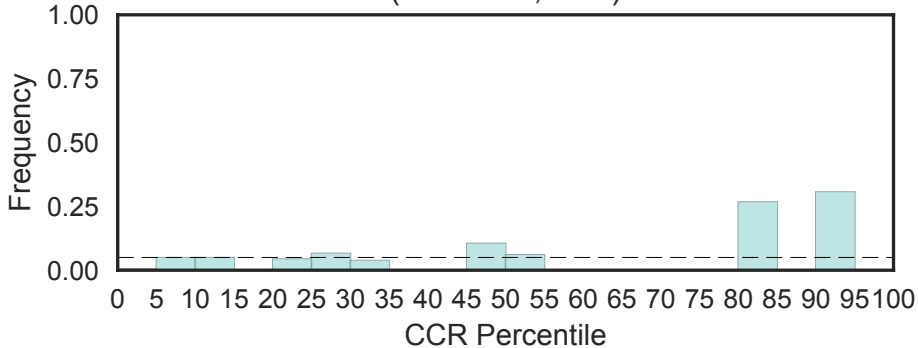

Unconventional myosin-X coiled coil domain  
(MYO10\_CC, N=1)

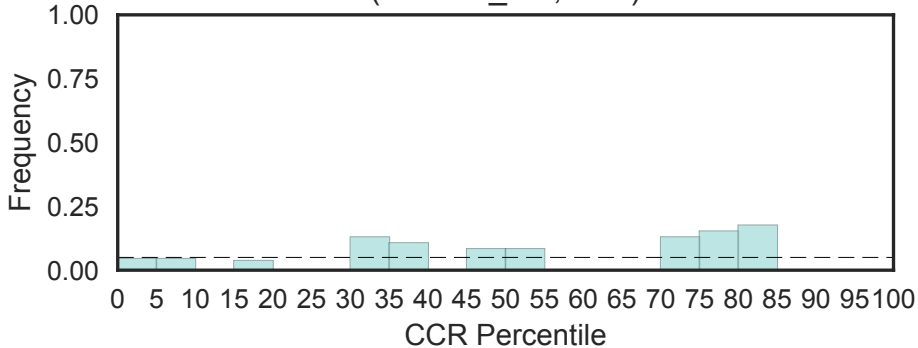

Myelin transcription factor 1  
(MYT1, N=4)

Fisher's OR: 1.72; Bonferroni p-val: 1

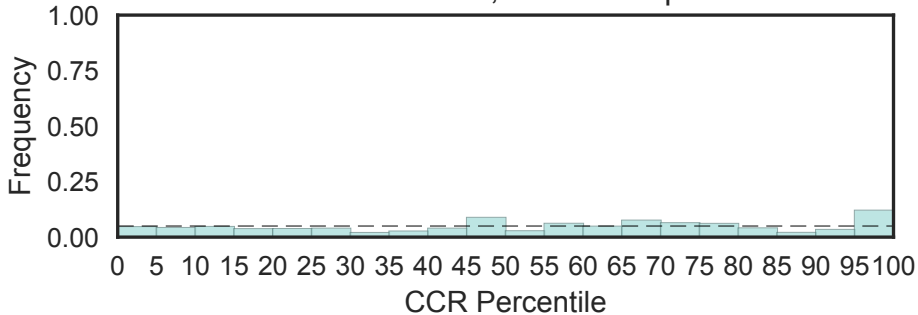

M domain of GW182  
(M\_domain, N=2)

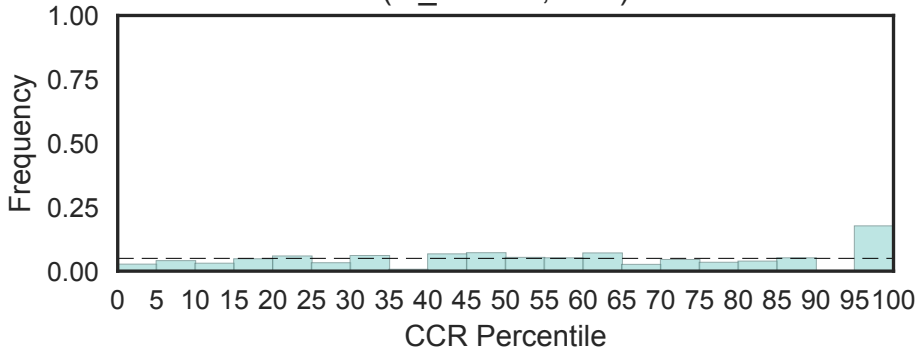

Mab-21 protein  
(Mab-21, N=12)

Fisher's OR: 0.737; Bonferroni p-val: 1

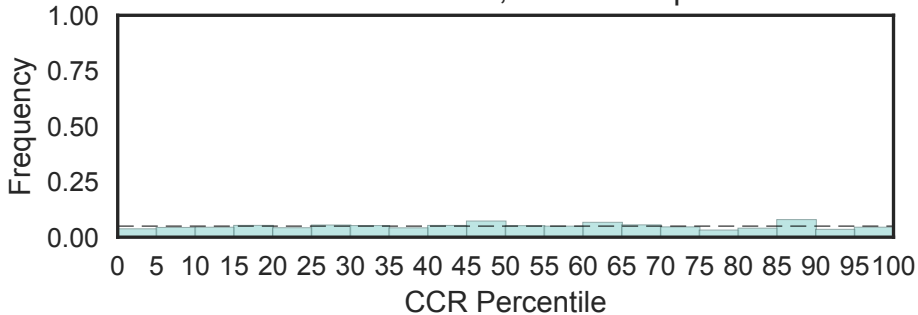

Macoilin family  
(Macoilin, N=1)

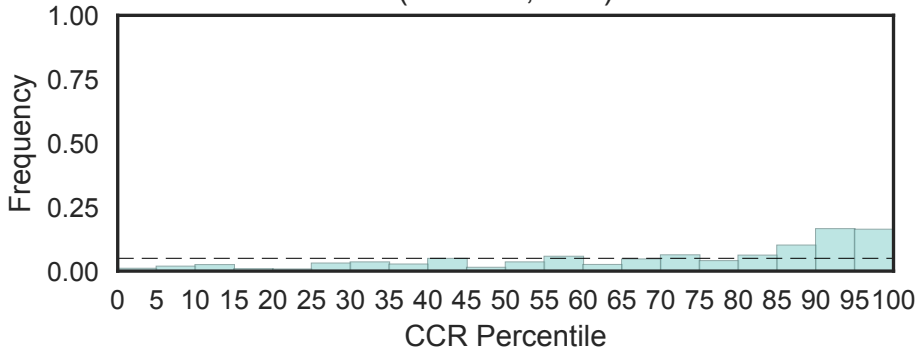

Macro domain  
(Macro, N=17)

Fisher's OR: 0.775; Bonferroni p-val: 1

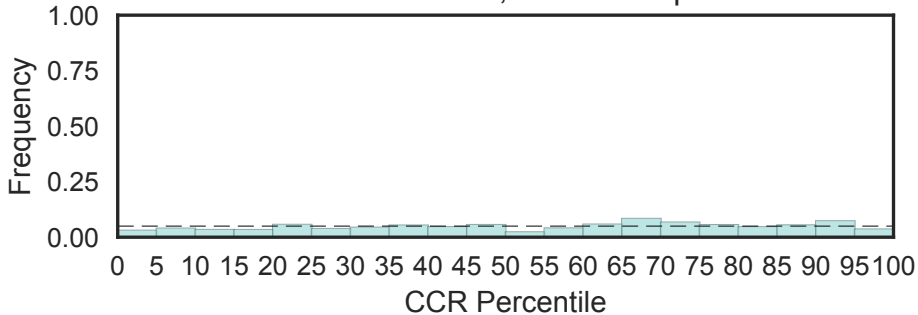



Macrophage scavenger receptor  
(Macscav\_rec, N=1)

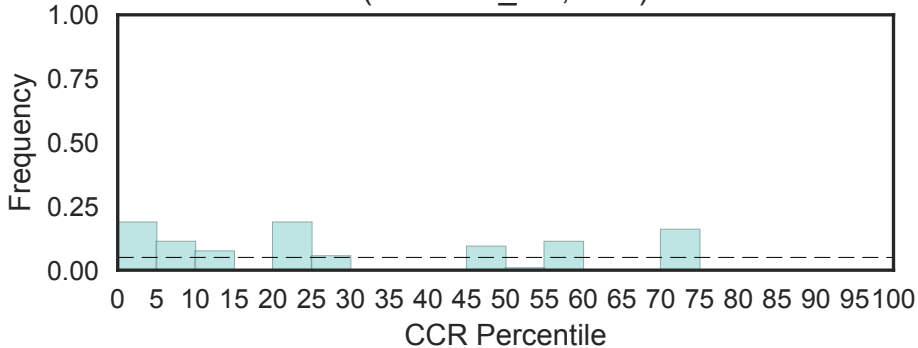

Mad3/BUB1 homology region 1  
(Mad3\_BUB1\_I, N=2)

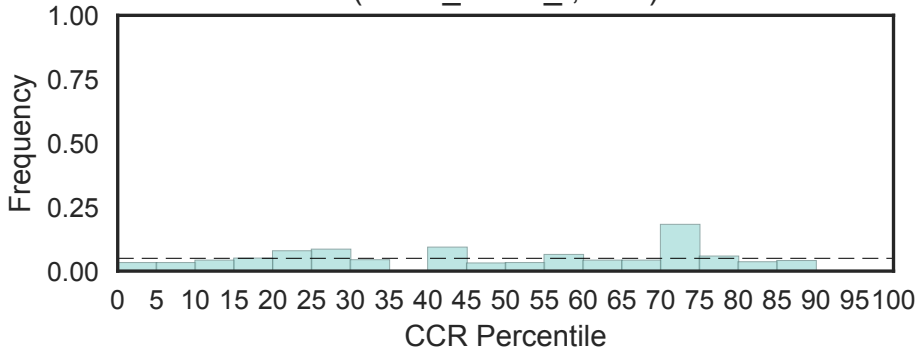

piRNA pathway germ-plasm component  
(Maelstrom, N=1)

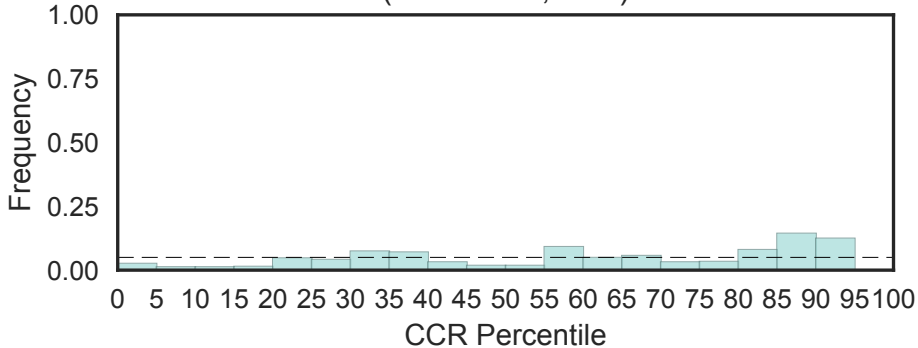

Maf1 regulator  
(Maf1, N=1)

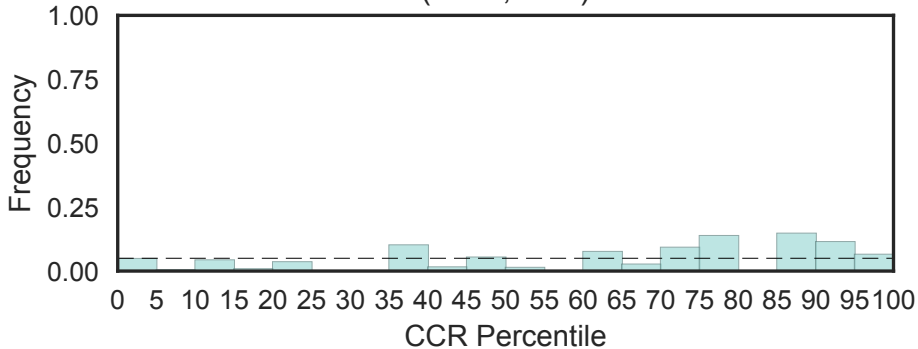

MafB19-like deaminase  
(MafB19-deam, N=4)

Fisher's OR: 0; Bonferroni p-val: 1

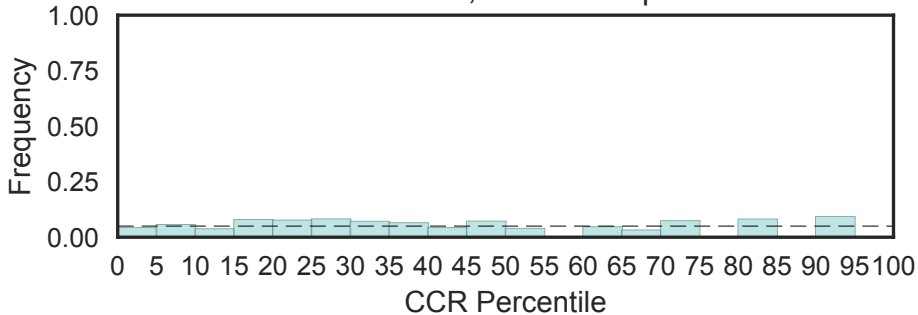

Maf N-terminal region  
(Maf\_N, N=4)

Fisher's OR: 4.5; Bonferroni p-val: 1

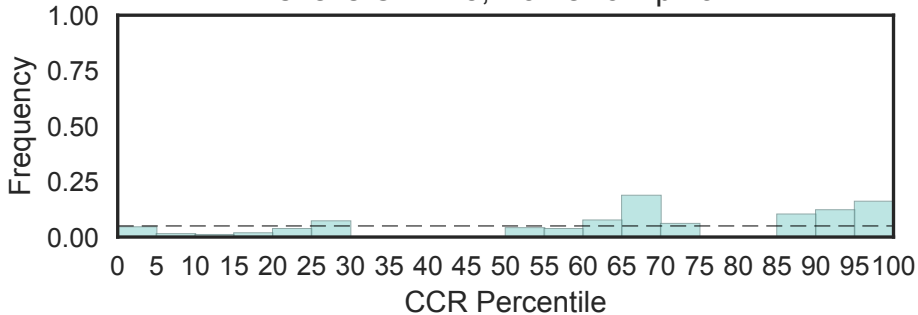

Mago binding  
(Mago-bind, N=1)

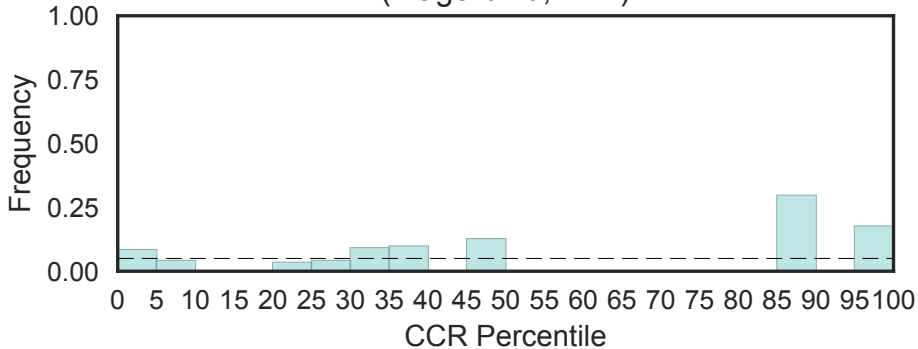

Mago nashi protein  
(Mago\_nashi, N=2)

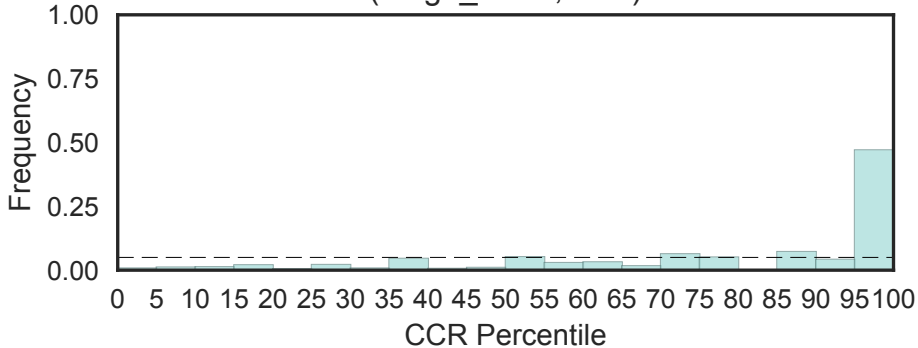



# Mak10 subunit, NatC N(alpha)-terminal acetyltransferase (Mak10, N=2)

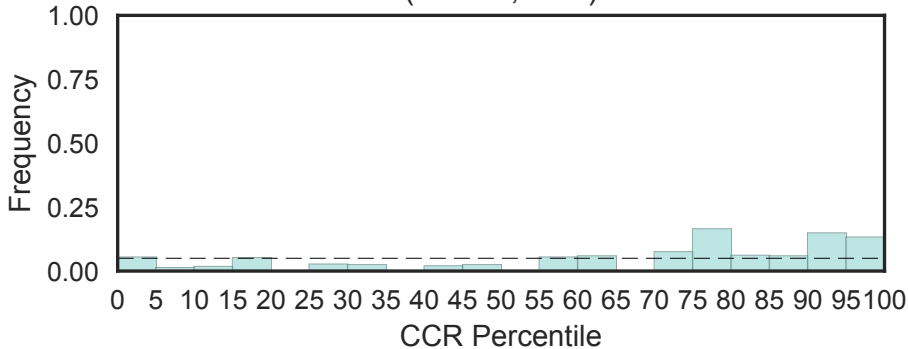

Mak16 protein C-terminal region  
(Mak16, N=1)

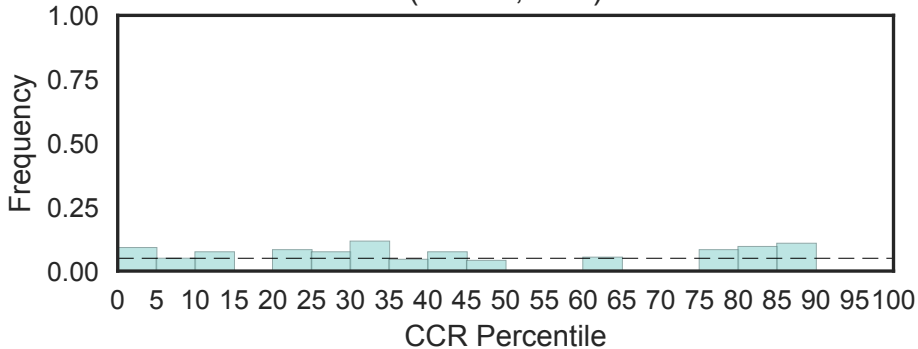

Di-glucose binding within endoplasmic reticulum  
(Malectin, N=1)

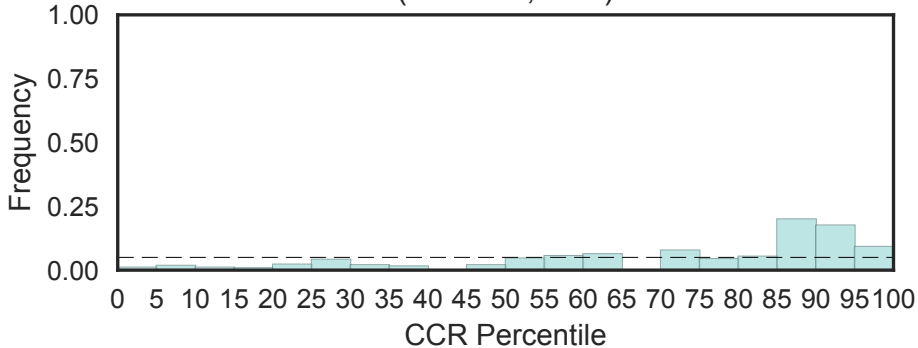

Malic enzyme, NAD binding domain  
(Malic\_M, N=3)

Fisher's OR: 0; Bonferroni p-val: 1

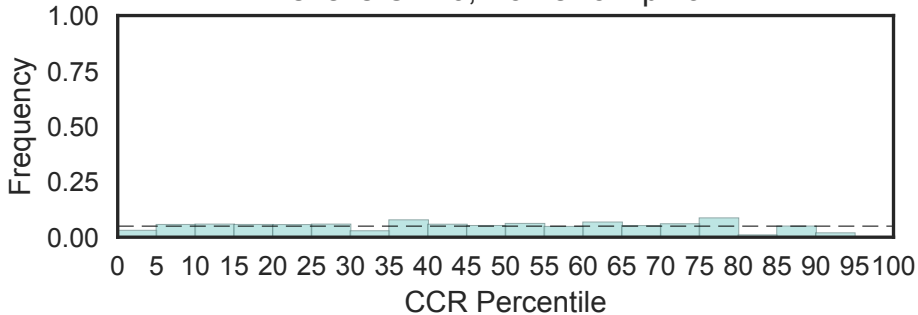

MamL-1 domain  
(MamL-1, N=3)

Fisher's OR: 3.38; Bonferroni p-val: 1

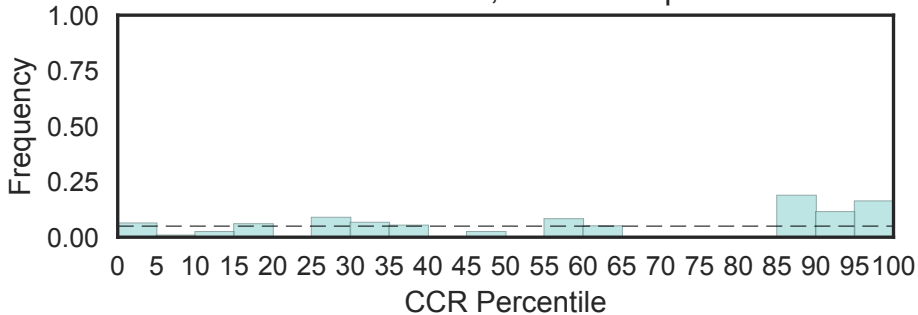

Mannose-6-phosphate receptor  
(Man-6-P\_recep, N=2)

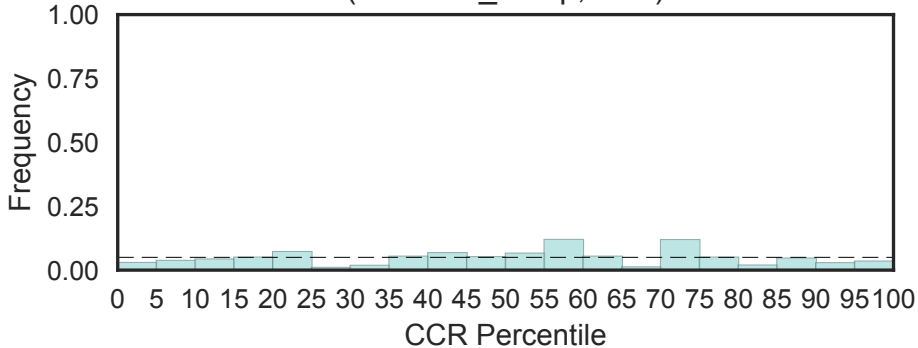

Mannosyltransferase (PIG-M)  
(Mannosyl\_trans, N=1)

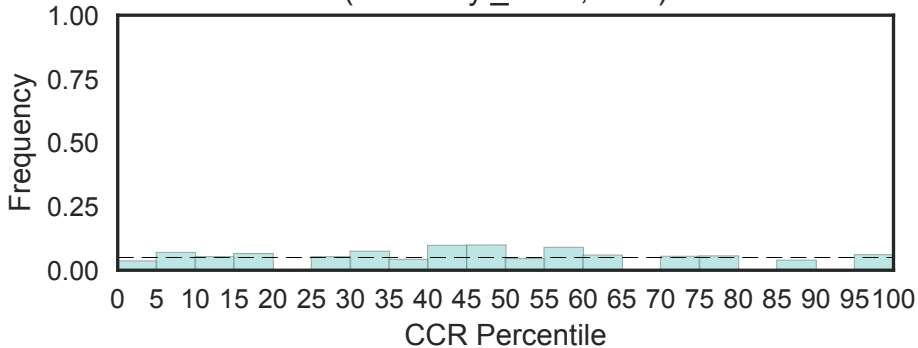

Mannosyltransferase (PIG-V)  
(Mannosyl\_trans2, N=1)

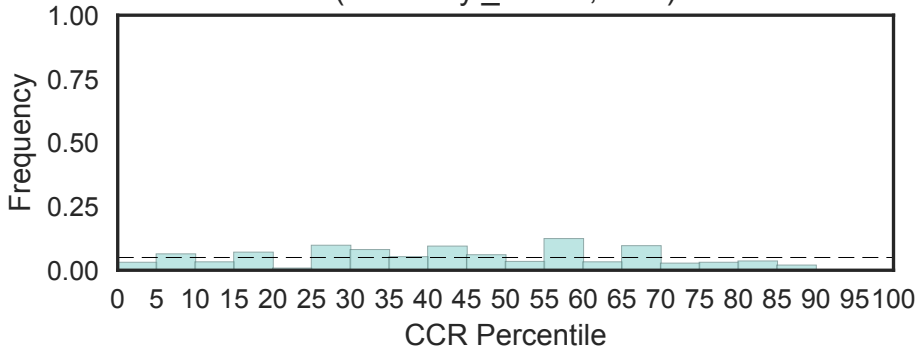



N-terminal half of MaoC dehydratase  
(MaoC\_dehydrat\_N, N=1)

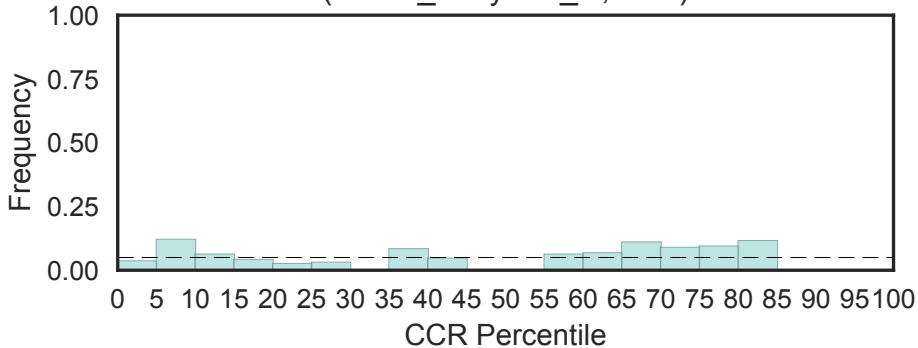

MaoC like domain  
(MaoC\_dehydratas, N=2)

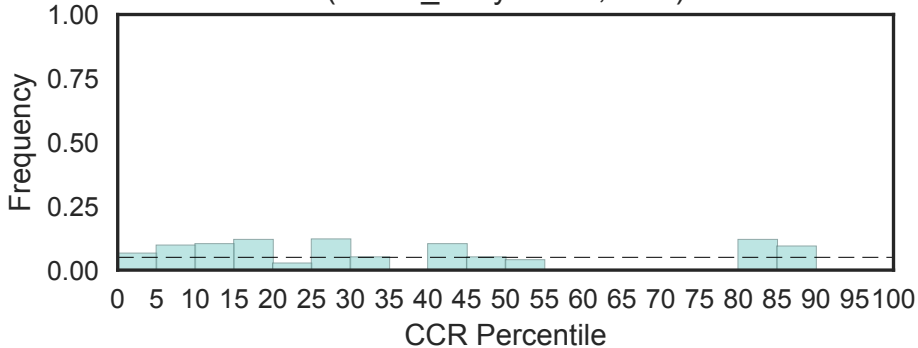

MatE

(MatE, N=4)

Fisher's OR: 0.296; Bonferroni p-val: 1

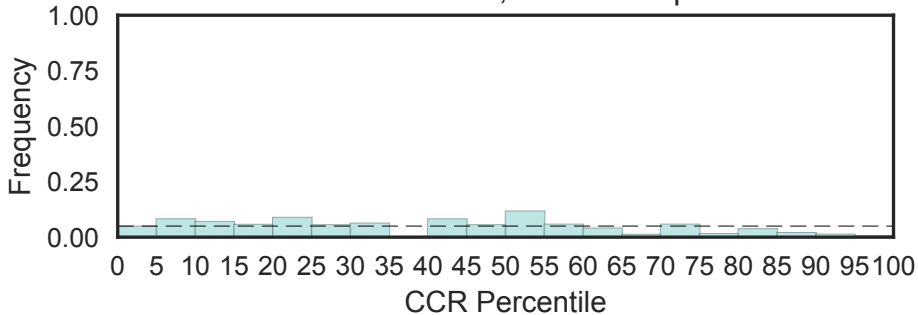

Trimeric coiled-coil oligomerisation domain of matrilin  
(Matrilin\_ccoil, N=4)

Fisher's OR: 0; Bonferroni p-val: 1

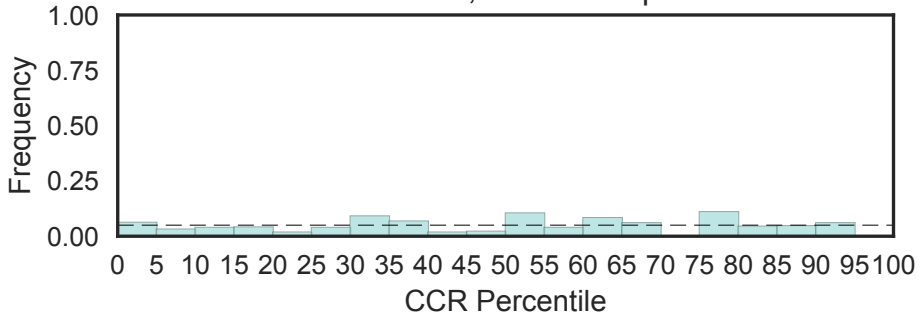

MazG nucleotide pyrophosphohydrolase domain  
(MazG, N=2)

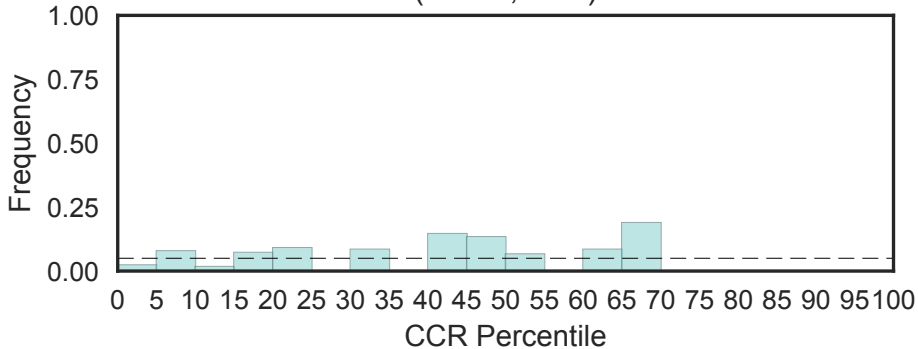

MazG-like family  
(MazG-like, N=2)

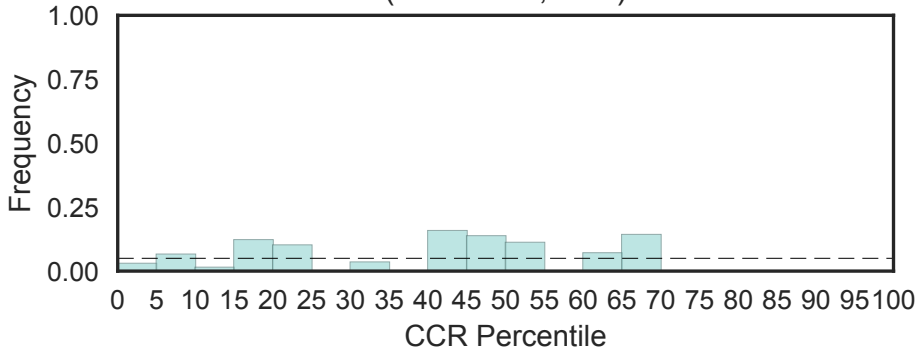

Minichromosome loss protein, Mcl1, middle region  
(Mcl1\_mid, N=1)

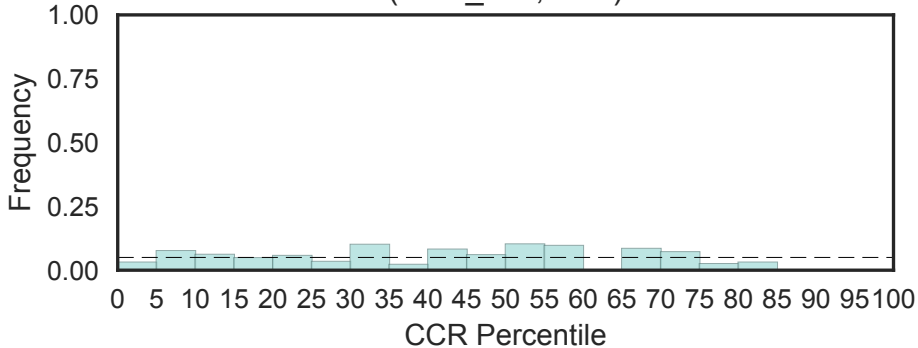

# Mcm10 replication factor (Mcm10, N=1)

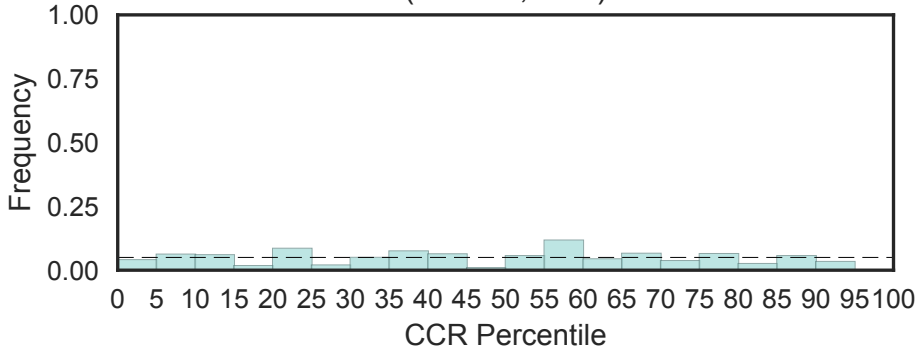



Meiotic cell cortex C-terminal pleckstrin homology  
(Mcp5\_PH, N=1)

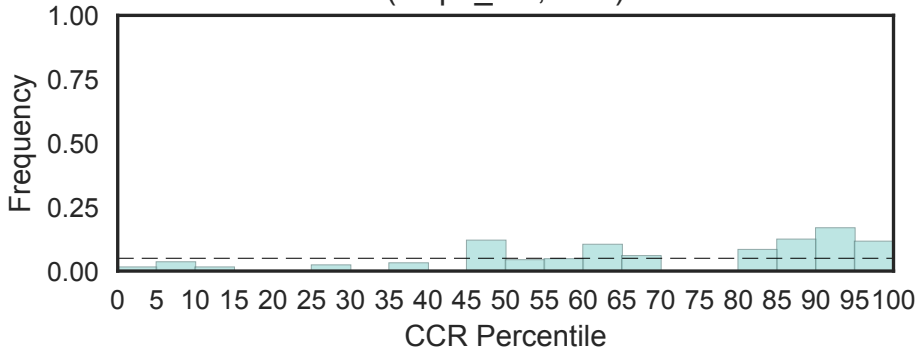

Meckelin (Transmembrane protein 67)  
(Meckelin, N=1)

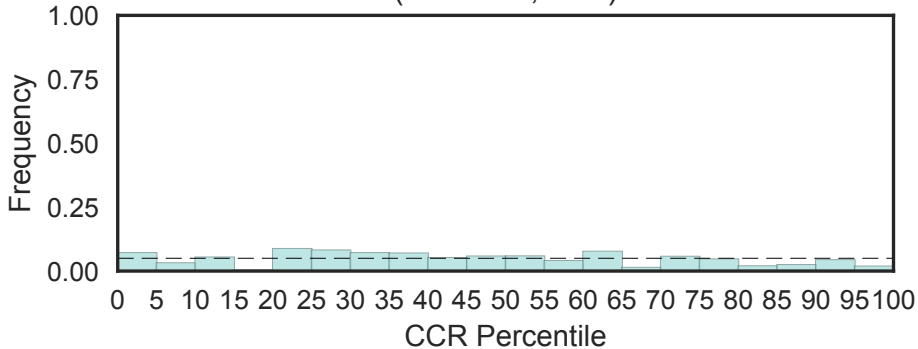

# Transcription factor subunit Med10 of Mediator complex (Med10, N=1)

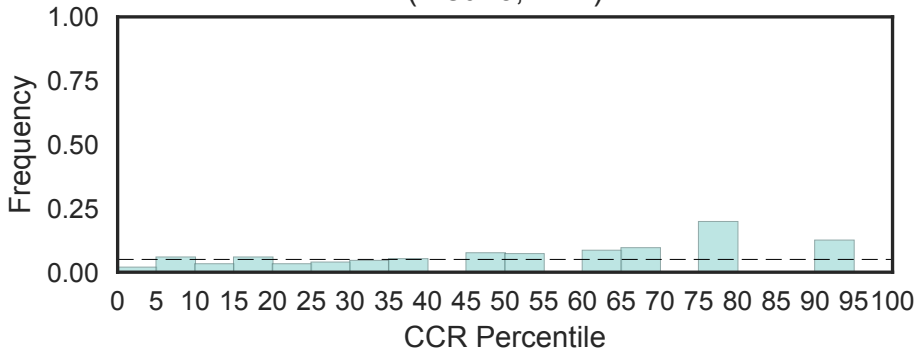

Mediator complex protein  
(Med11, N=1)

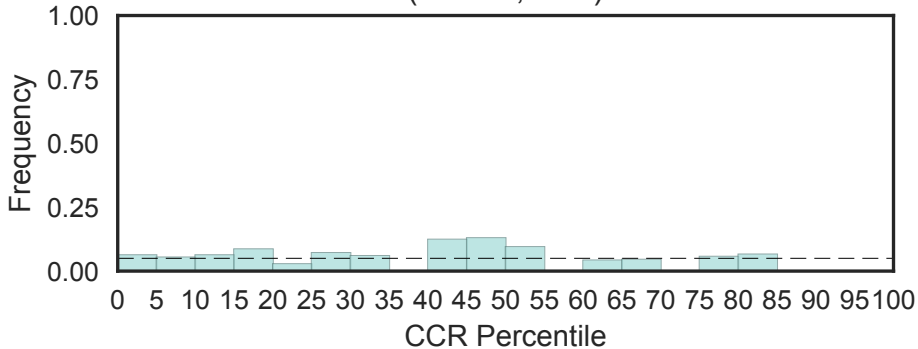

Transcription mediator complex subunit Med12  
(Med12, N=1)

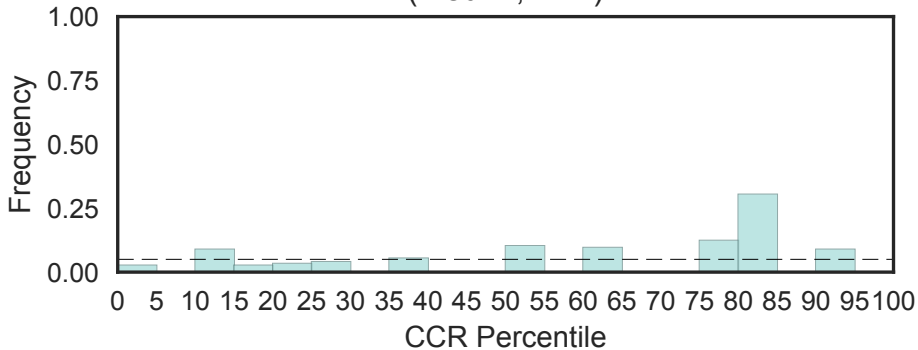

Eukaryotic Mediator 12 subunit domain  
(Med12-LCEWAV, N=6)

Fisher's OR: 0.507; Bonferroni p-val: 1

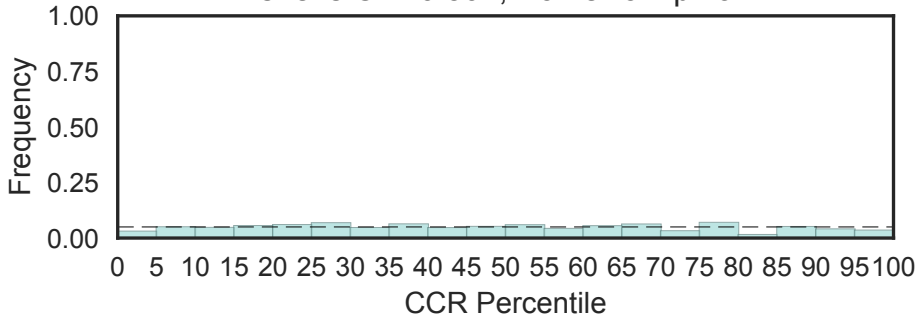

Eukaryotic Mediator 12 catenin-binding domain  
(Med12-PQL, N=2)

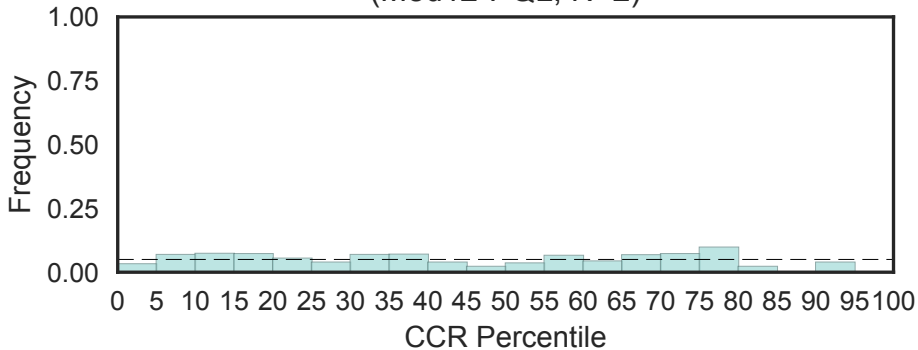

Mediator complex subunit 13 C-terminal  
(Med13\_C, N=2)

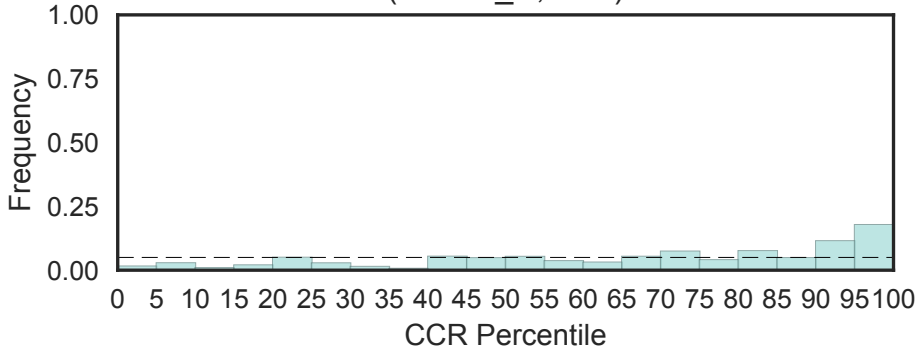



Mediator complex subunit 13 N-terminal  
(Med13\_N, N=2)

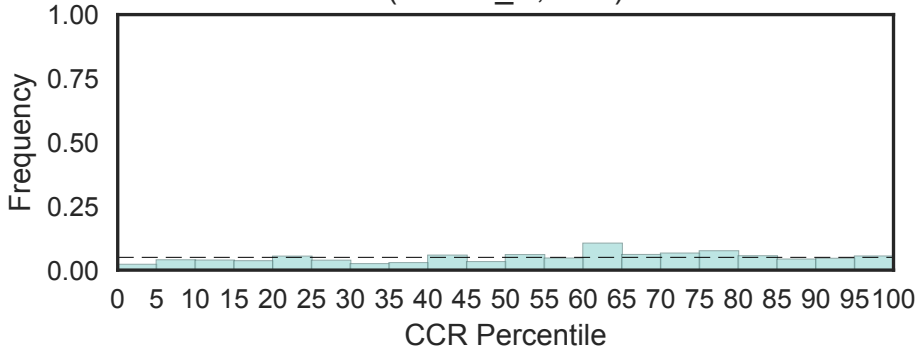

# ARC105 or Med15 subunit of Mediator complex non-fungal (Med15, N=2)

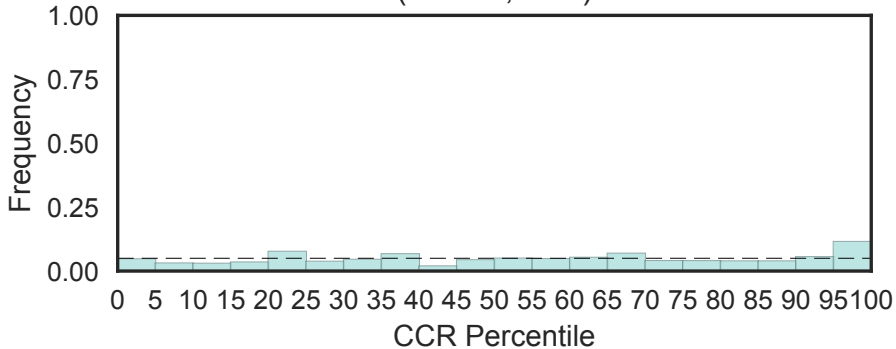

Mediator complex subunit 16  
(Med16, N=1)

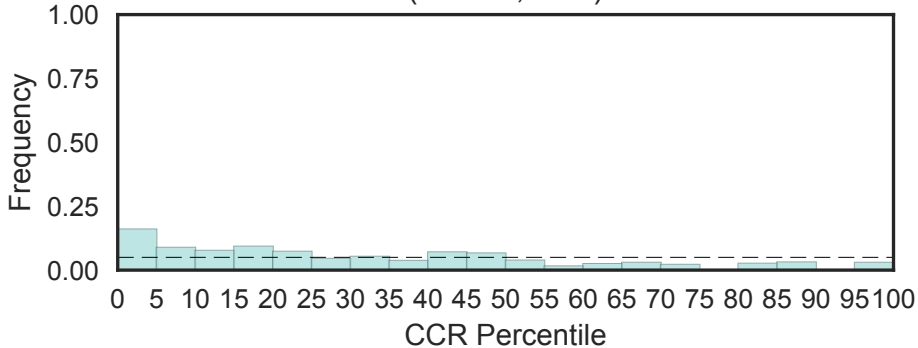

# Subunit 17 of Mediator complex (Med17, N=1)

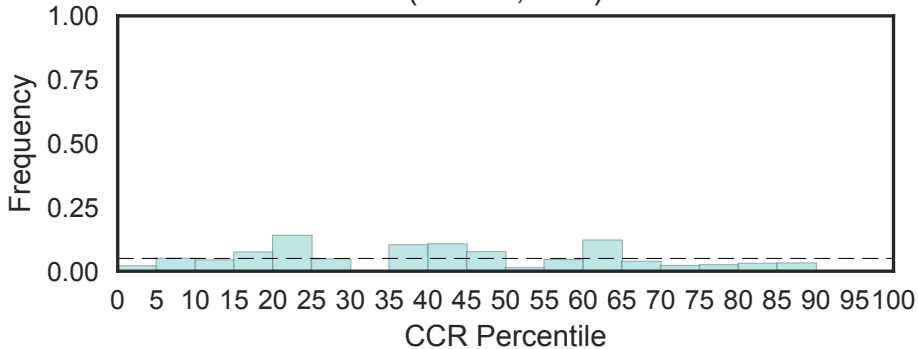

Med18 protein  
(Med18, N=1)

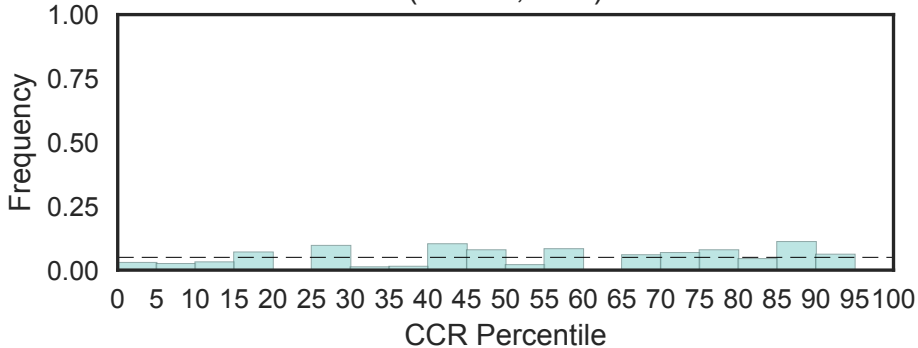

Mediator of RNA pol II transcription subunit 19  
(Med19, N=1)

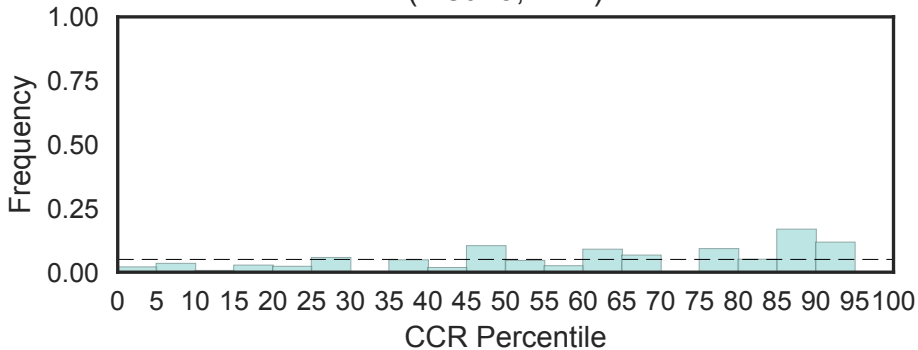

# TATA-binding related factor (TRF) of subunit 20 of Mediator complex (Med20, N=1)

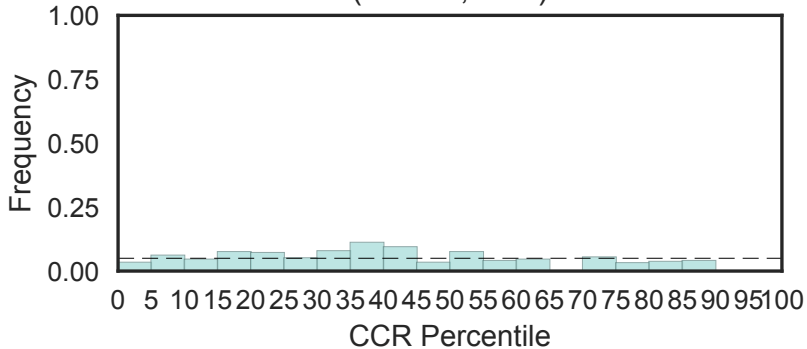

# Subunit 21 of Mediator complex (Med21, N=1)

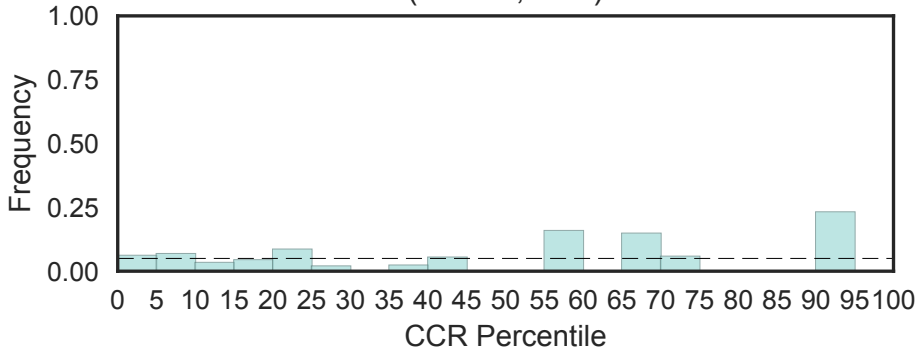



Surfeit locus protein 5 subunit 22 of Mediator complex  
(Med22, N=1)

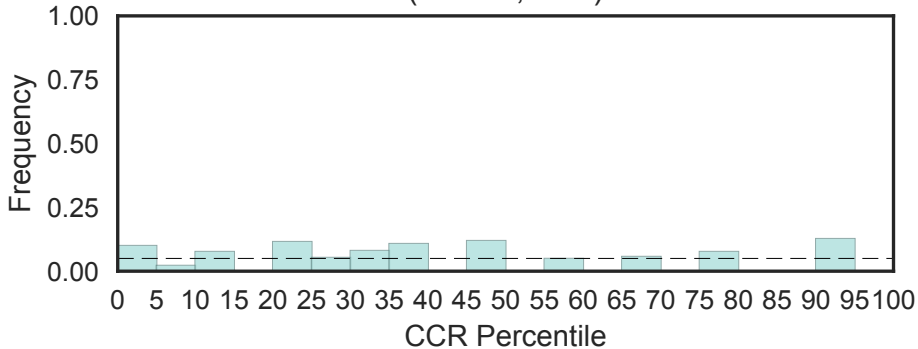

Mediator complex subunit 23  
(Med23, N=1)

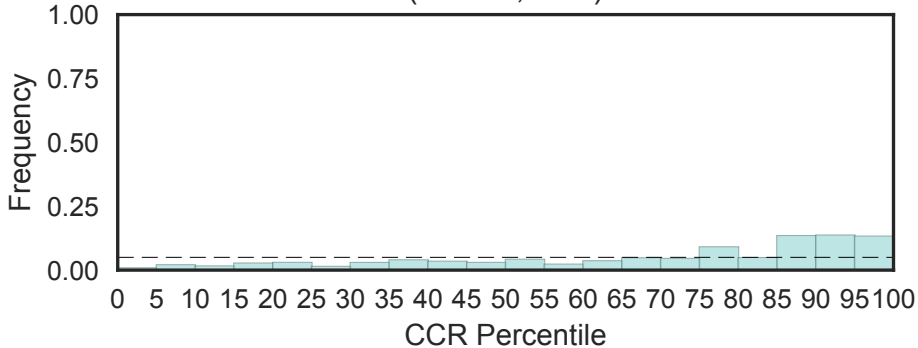

Mediator complex subunit 24 N-terminal  
(Med24\_N, N=1)

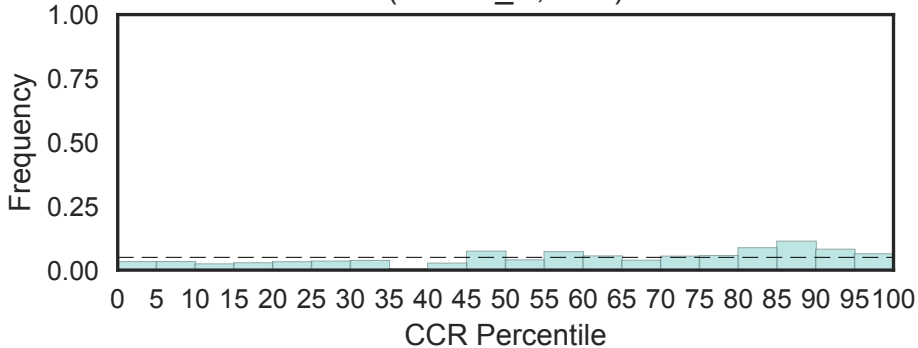

Mediator complex subunit 25 PTOV activation and synapsin 2  
(Med25, N=3)

Fisher's OR: 0.667; Bonferroni p-val: 1

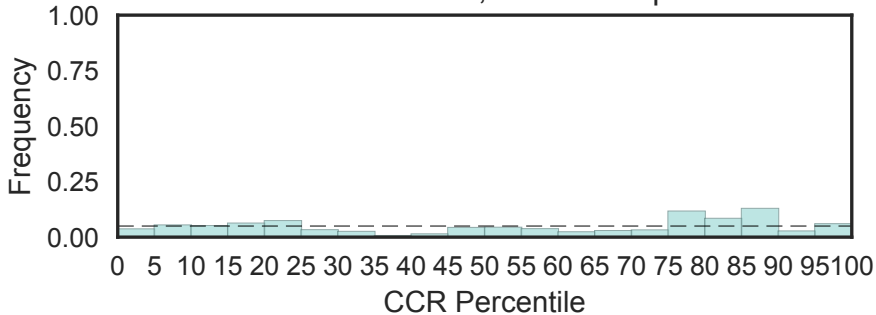

Mediator complex subunit 25 C-terminal NR box-containing  
(Med25\_NR-box, N=1)

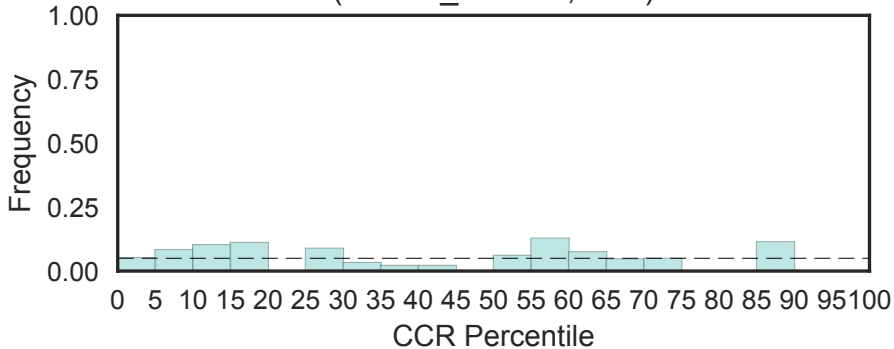

Mediator complex subunit 25 synapsin 1  
(Med25\_SD1, N=1)

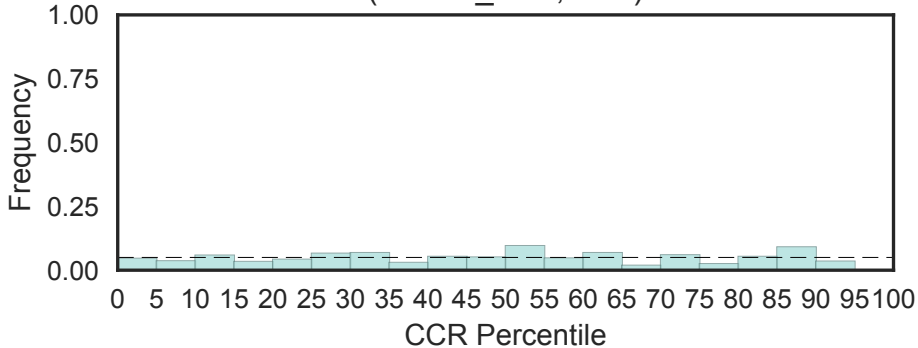

Mediator complex subunit 25 von Willebrand factor type A  
(Med25\_VWA, N=1)

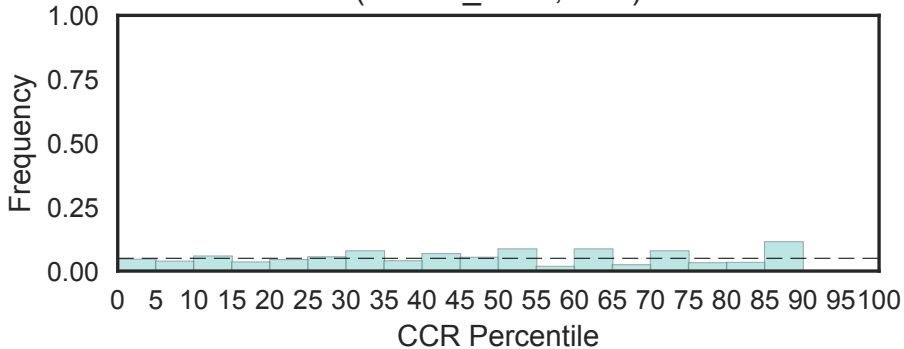

TFIIS helical bundle-like domain  
(Med26, N=13)  
Fisher's OR: 4.2; Bonferroni p-val: 1

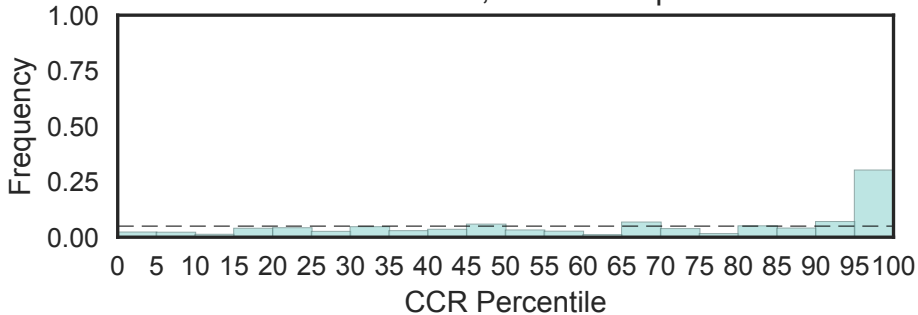



Mediator complex subunit 26 C-terminal  
(Med26\_C, N=1)

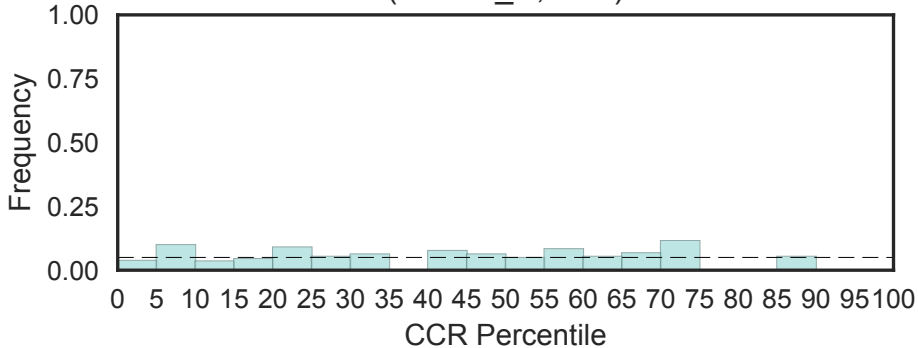

Mediator complex subunit 26 middle domain  
(Med26\_M, N=1)

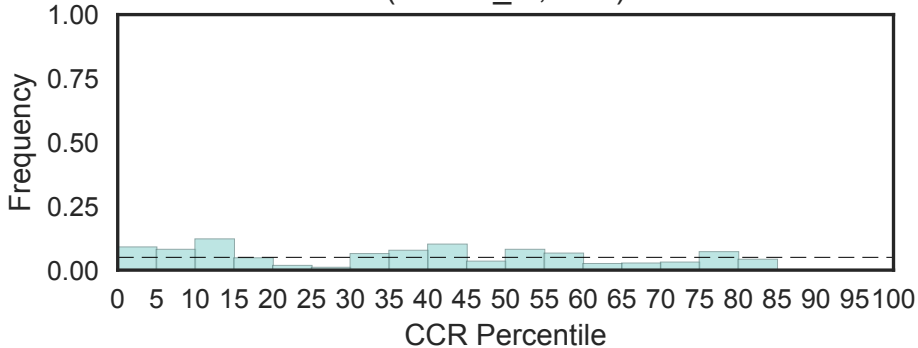

Mediator complex subunit 27  
(Med27, N=1)

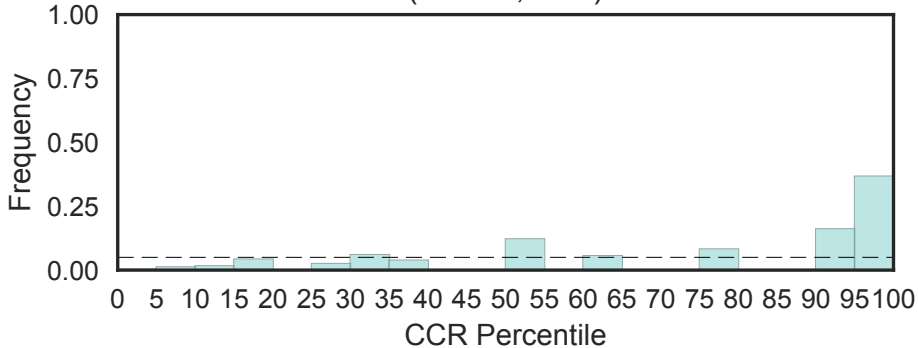

Mediator complex subunit 28  
(Med28, N=1)

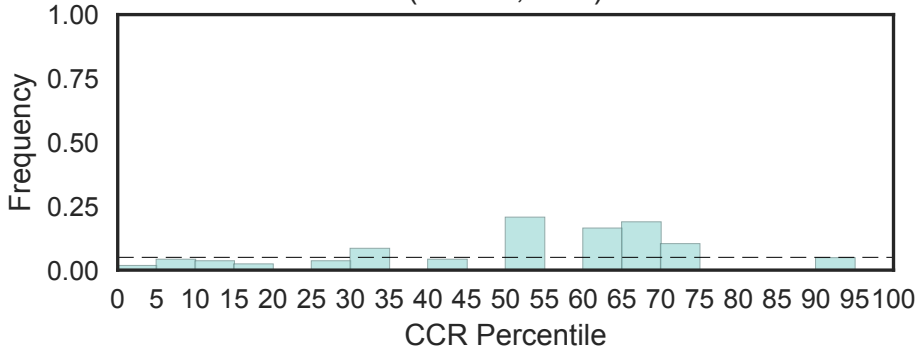

Mediator complex subunit 29  
(Med29, N=1)

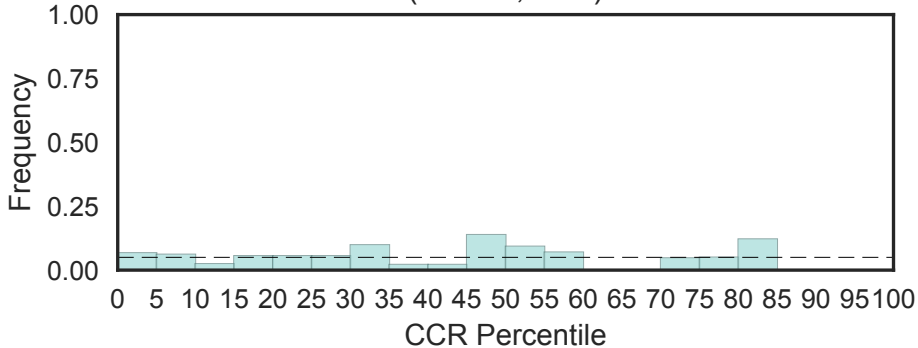

Mediator complex subunit 30  
(Med30, N=1)

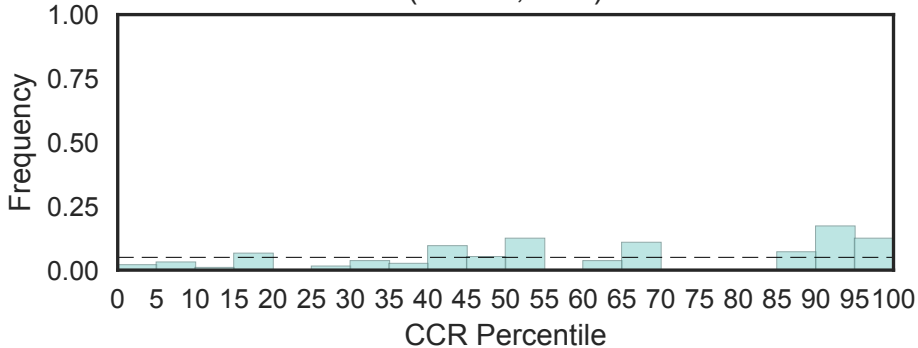

# SOH1 (Med31, N=1)

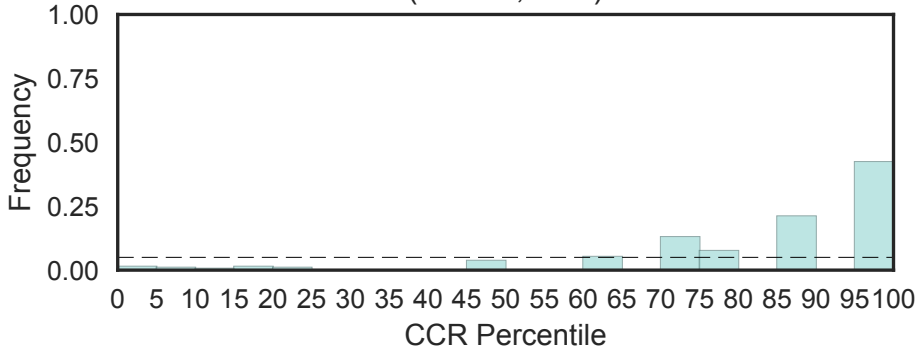

Vitamin-D-receptor interacting Mediator subunit 4  
(Med4, N=1)

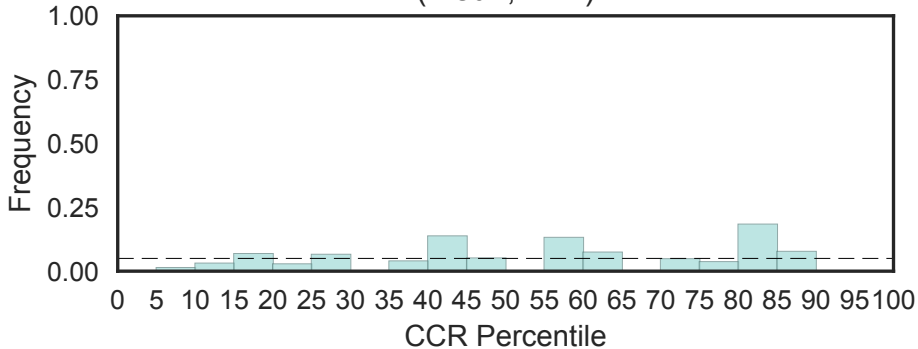



MED6 mediator sub complex component  
(Med6, N=1)

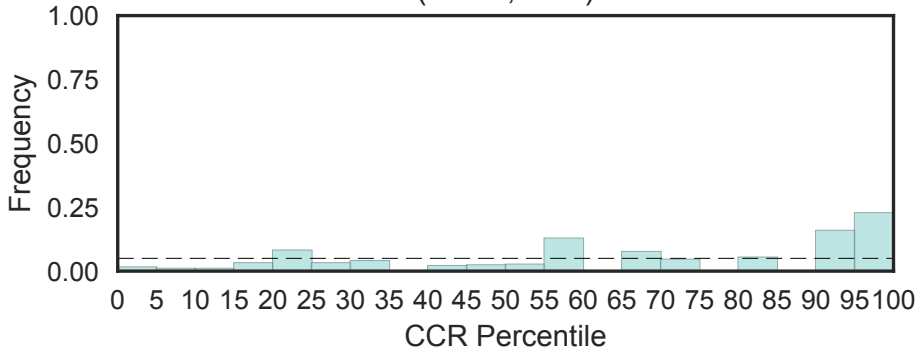

MED7 protein  
(Med7, N=1)

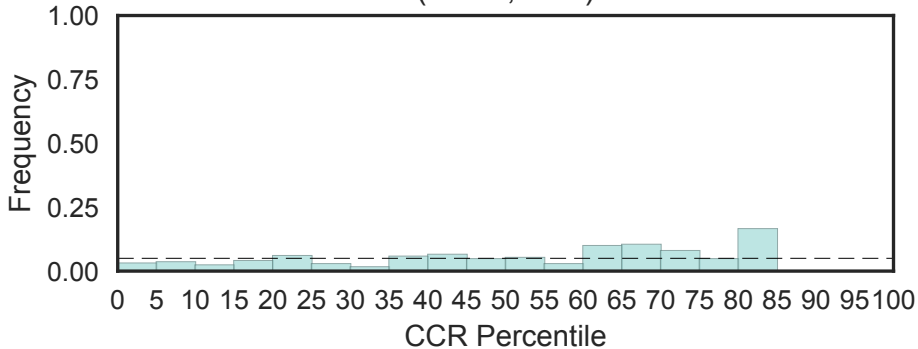

# Mediator of RNA polymerase II transcription complex subunit 8 (Med8, N=1)

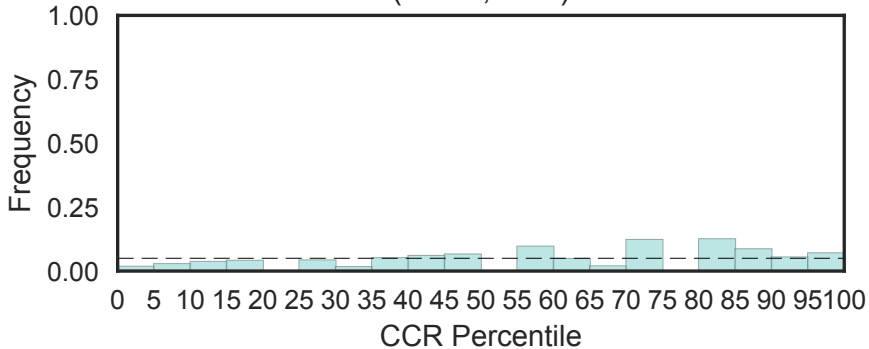

# RNA polymerase II transcription mediator complex subunit 9 (Med9, N=1)

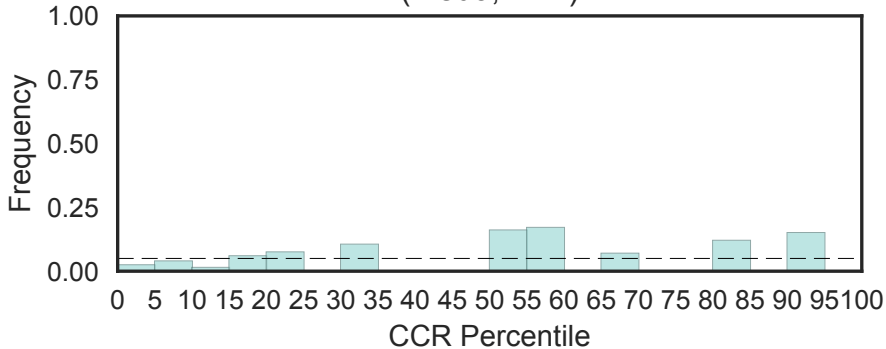

Double-strand recombination repair protein  
(Mei5, N=1)

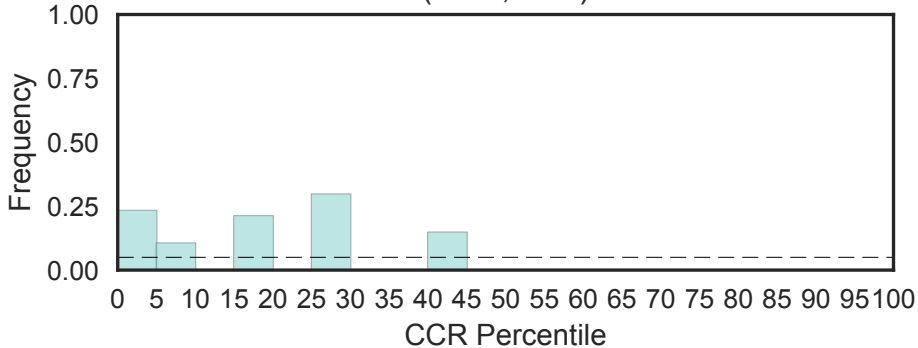

Meiosis-expressed  
(Meiosis\_expr, N=1)

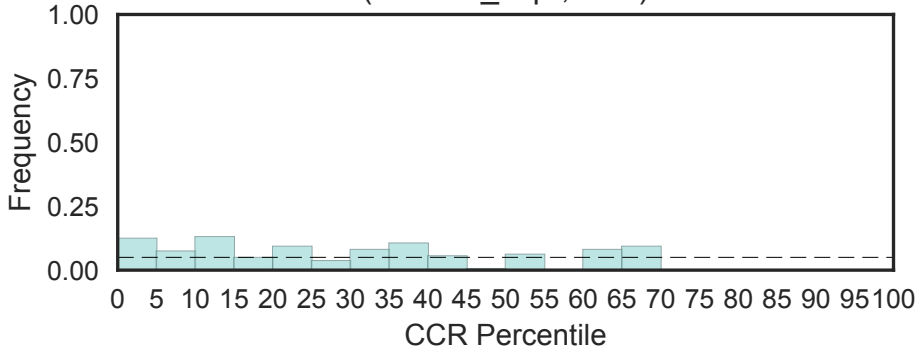

N-terminal of Homeobox Meis and PKN0X1  
(Meis\_PKN0X1\_N, N=5)

Fisher's OR: 2.62; Bonferroni p-val: 1

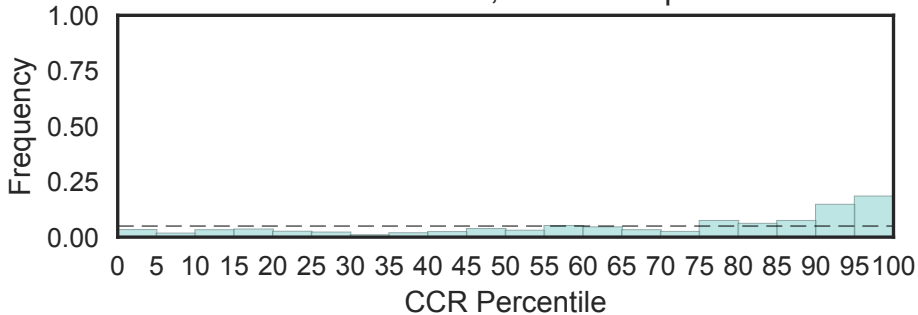

Alpha galactosidase A  
(Melibiase\_2, N=1)

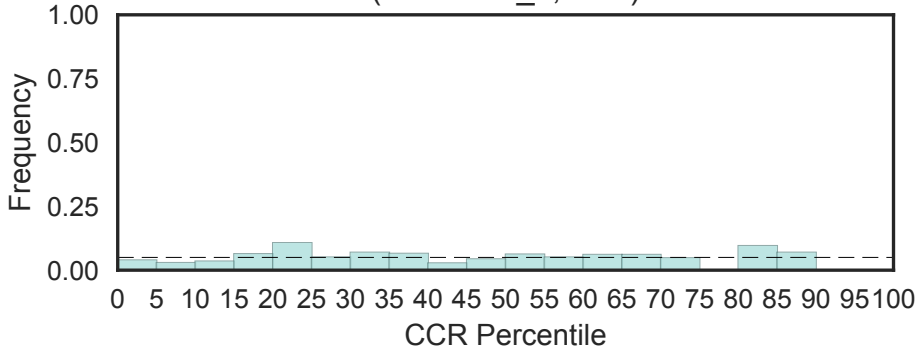



Alpha galactosidase A C-terminal beta sandwich domain  
(Melibiase\_2\_C, N=1)

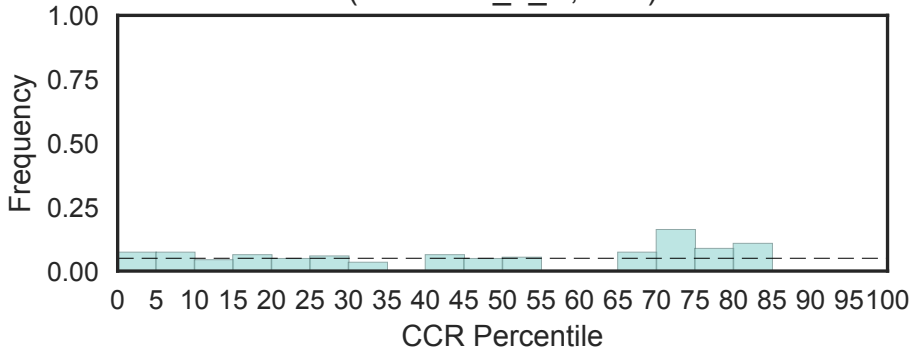

# Membrane transport protein (Mem\_trans, N=2)

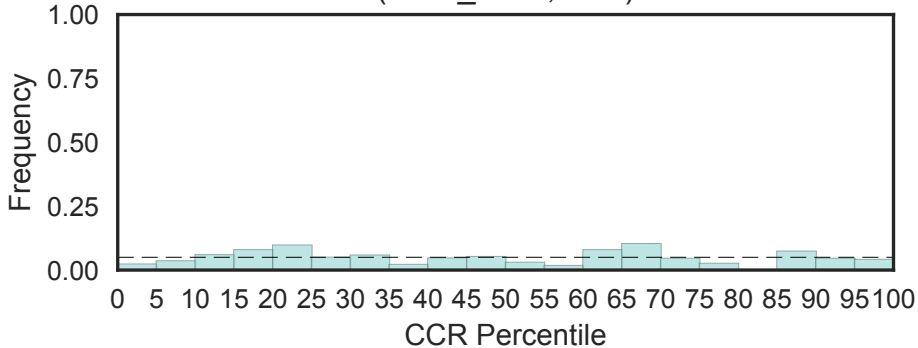

Munc13 (mammalian uncoordinated) homology domain  
(Membr\_traf\_MHD, N=5)

Fisher's OR: 2.54; Bonferroni p-val: 1

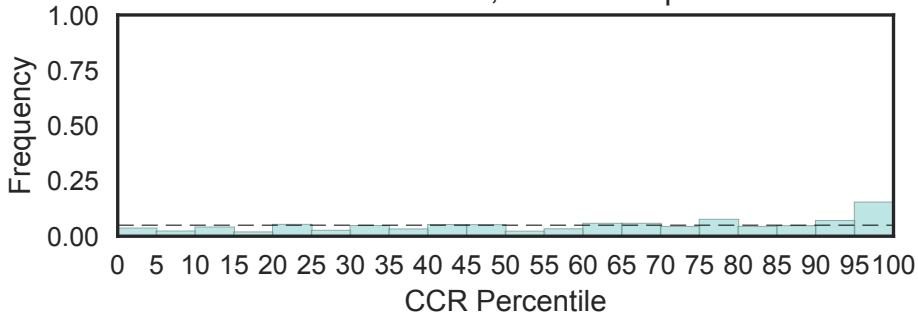

Tumour-associated protein  
(Membralin, N=1)

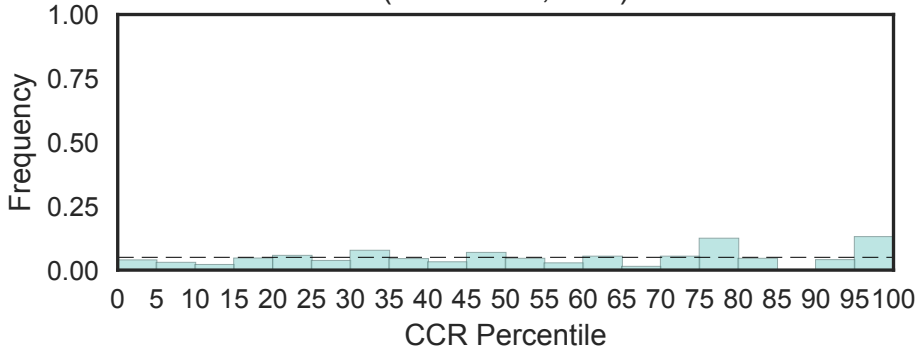

Memo-like protein  
(Memo, N=1)

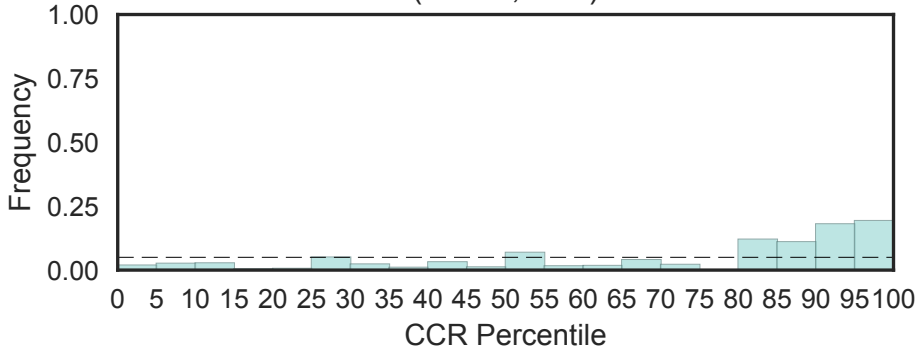

# Menin (Menin, N=2)

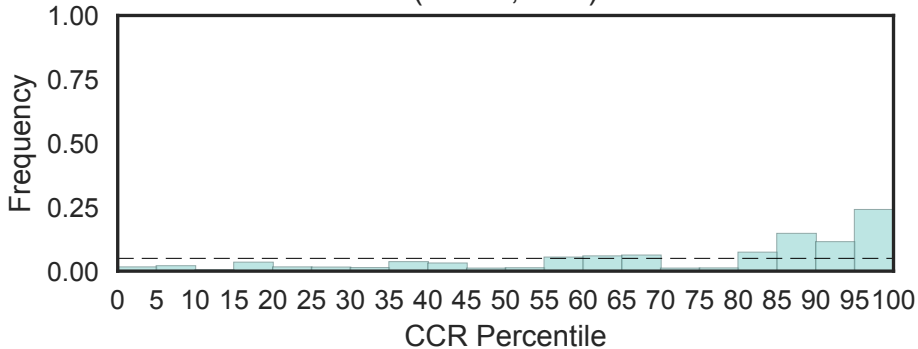

# Chaperone for wingless signalling and trafficking of LDL receptor (Mesd, N=1)

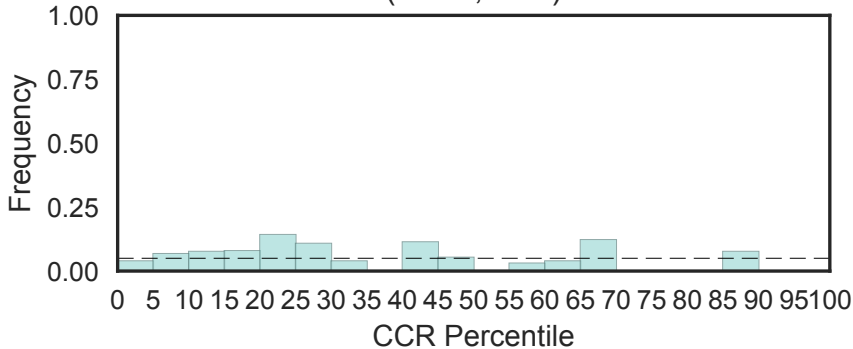

Pre-pro-megakaryocyte potentiating factor precursor (Mesothelin)  
(Mesothelin, N=1)

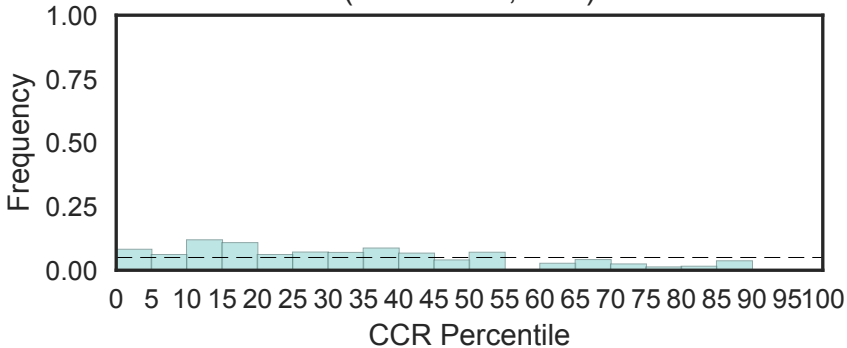



Met-10+ like-protein  
(Met\_10, N=8)

Fisher's OR: 0.584; Bonferroni p-val: 1

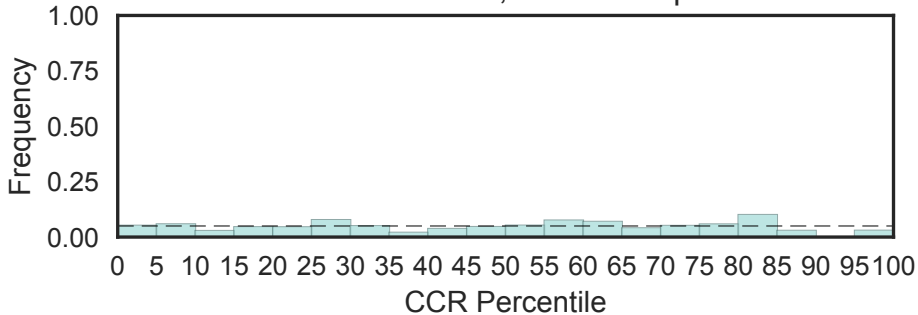

Vitamin B12 dependent methionine synthase, activation domain  
(Met\_synt\_B12, N=1)

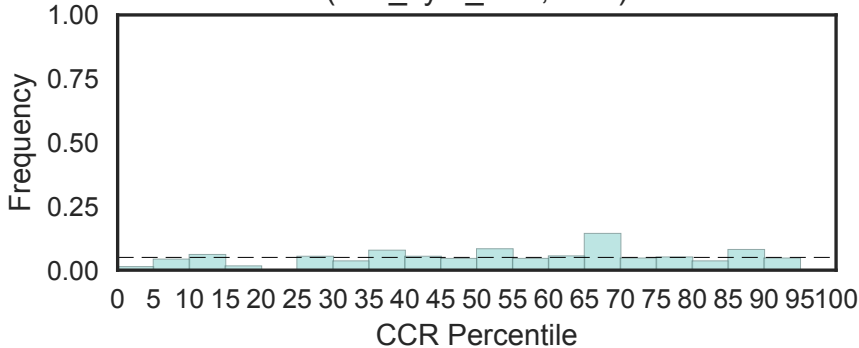

Metalloenzyme superfamily  
(Metalloenzyme, N=1)

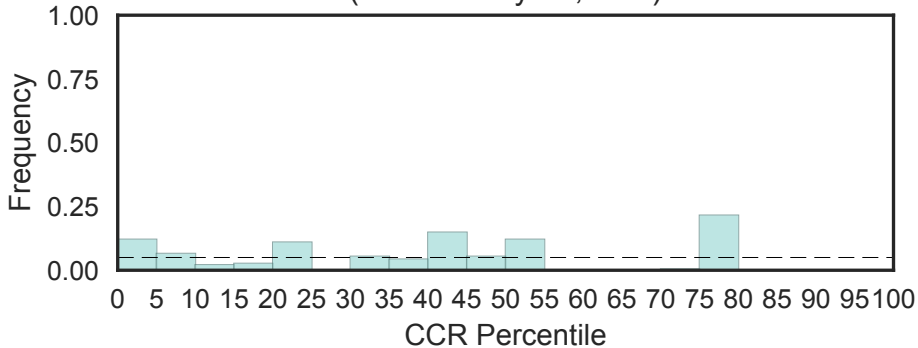

Calcineurin-like phosphoesterase  
(Metallophos, N=28)

Fisher's OR: 2.81; Bonferroni p-val: 1.77e-05

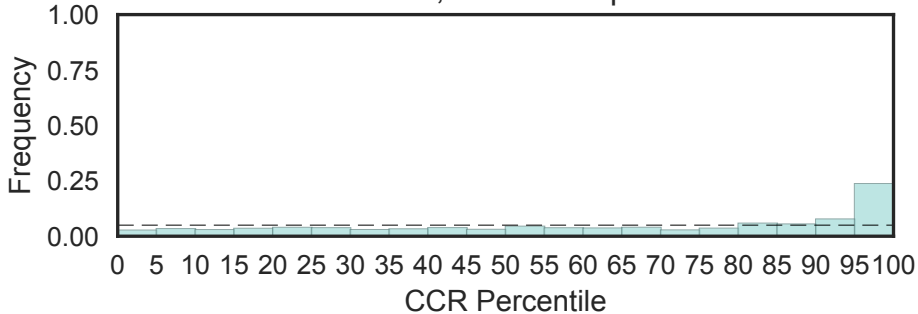

Calcineurin-like phosphoesterase superfamily domain  
(Metallophos\_2, N=3)

Fisher's OR: 2.82; Bonferroni p-val: 1

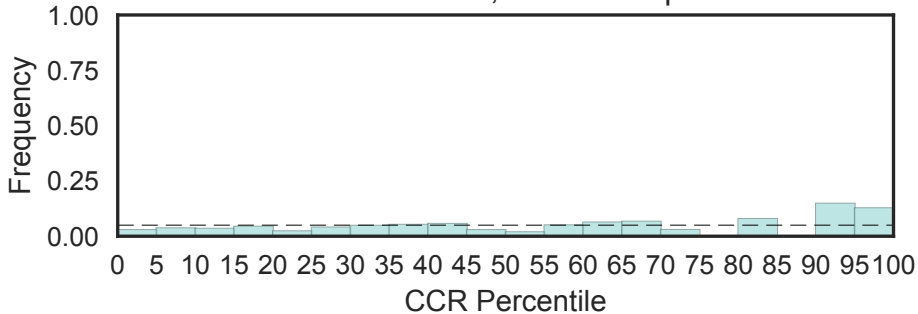

Iron/zinc purple acid phosphatase-like protein C  
(Metallophos\_C, N=1)

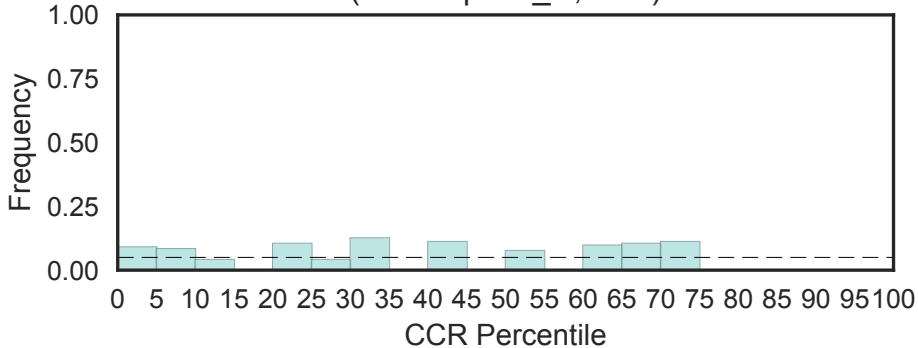

Metallothionein  
(Metallothio, N=12)  
Fisher's OR: 0; Bonferroni p-val: 1

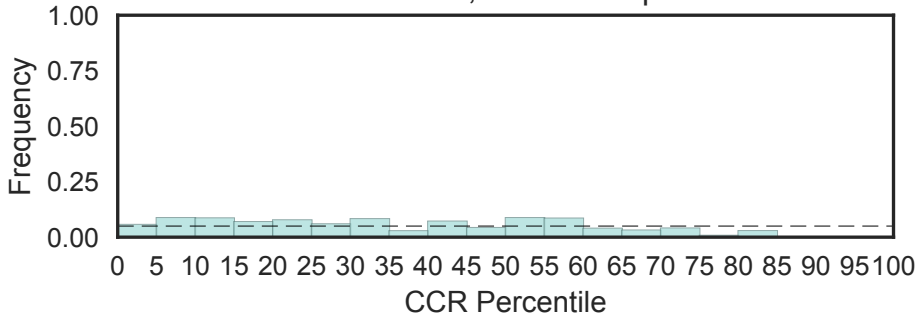

16S rRNA methyltransferase RsmB/F  
(Methyltr\_RsmB-F, N=7)  
Fisher's OR: 0.515; Bonferroni p-val: 1

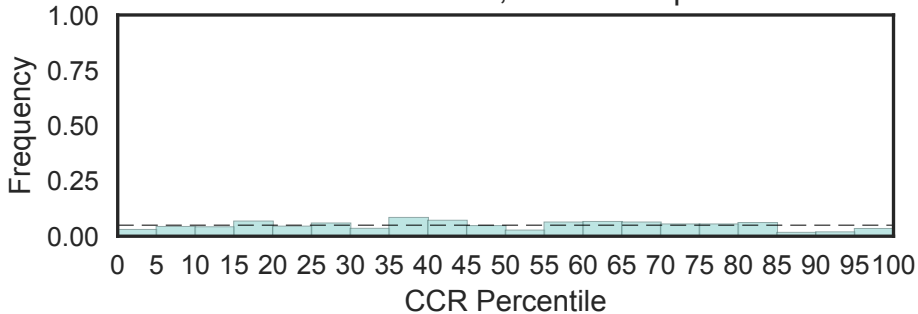



N-terminal domain of 16S rRNA methyltransferase RsmF  
(Methyltr\_RsmF\_N, N=1)

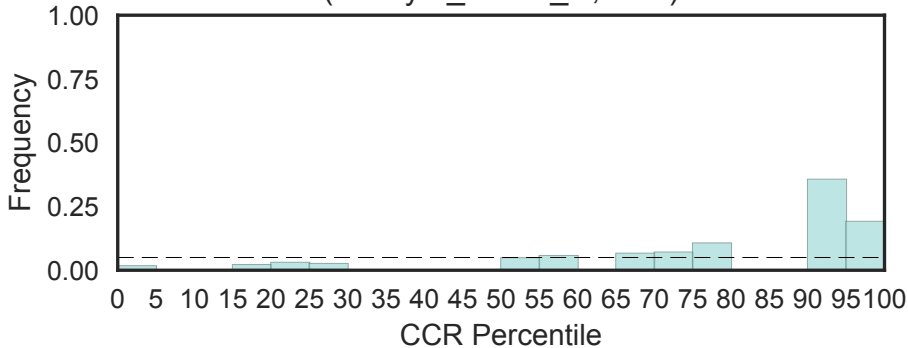

Protein of unknown function (DUF890)  
(Methyltransf\_10, N=1)

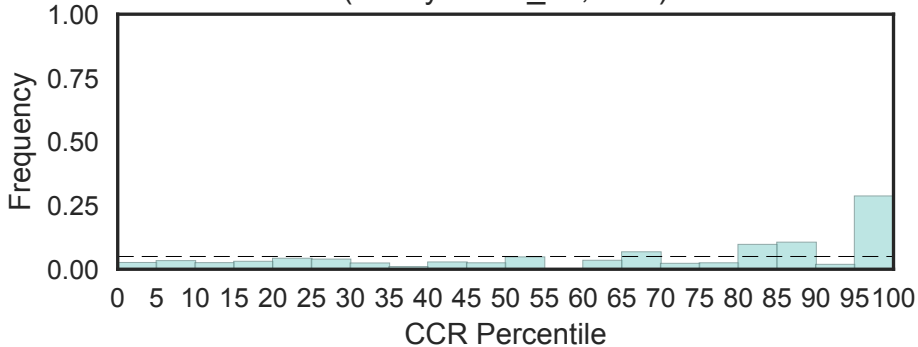

# Methyltransferase domain

(Methyltransf\_11, N=38)

Fisher's OR: 0.794; Bonferroni p-val: 1

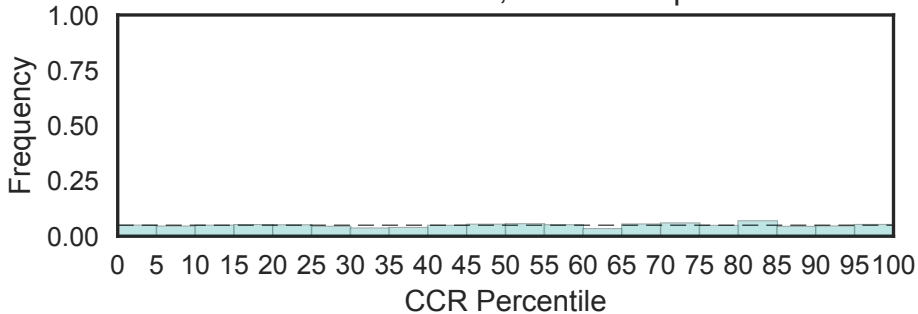

# Methyltransferase domain

(Methyltransf\_12, N=17)

Fisher's OR: 0.511; Bonferroni p-val: 1

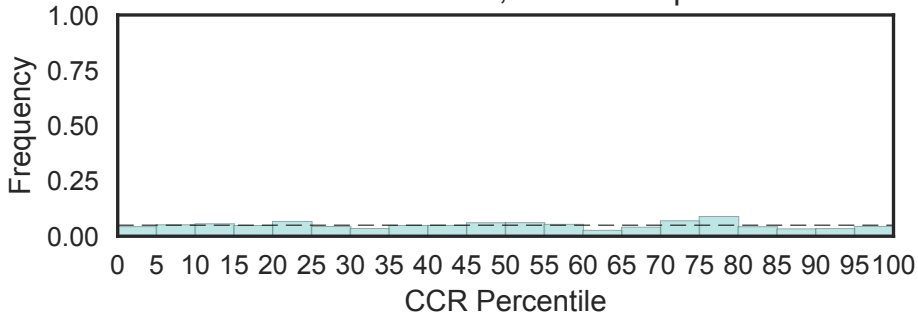

RNA cap guanine-N2 methyltransferase  
(Methyltransf\_15, N=1)

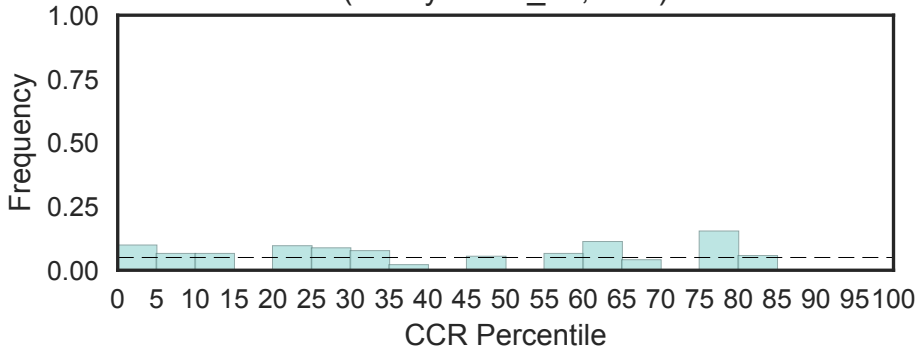

Lysine methyltransferase  
(Methyltransf\_16, N=15)  
Fisher's OR: 0; Bonferroni p-val: 1

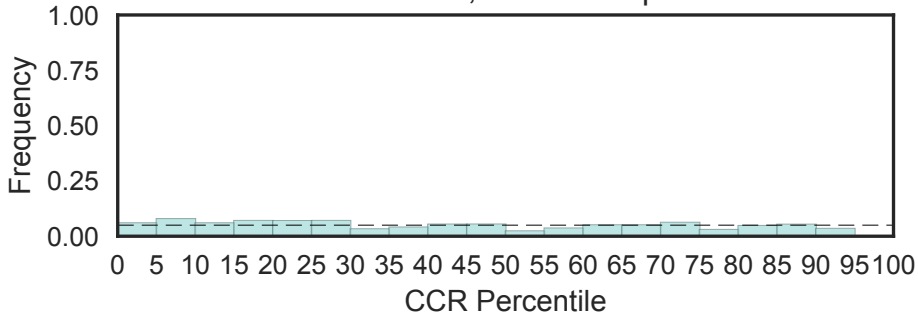

6-O-methylguanine DNA methyltransferase, ribonuclease-like domain  
(Methyltransf\_1N, N=1)

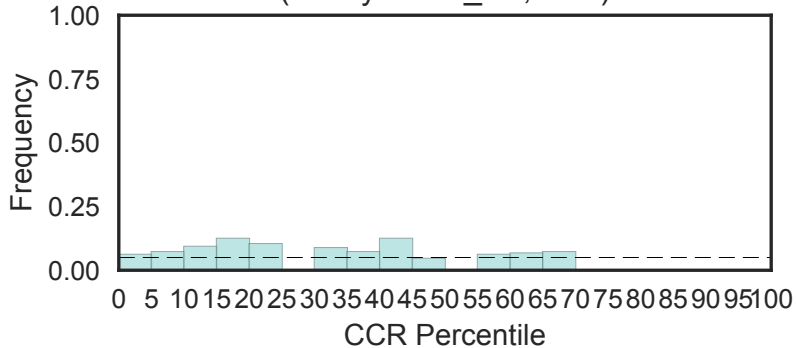

O-methyltransferase  
(Methyltransf\_2, N=1)

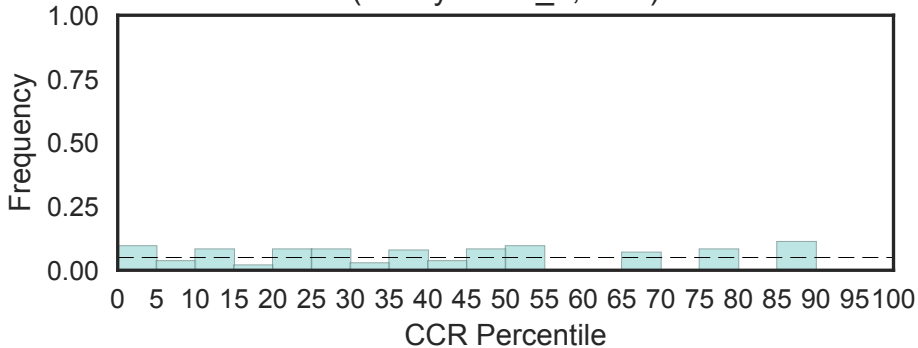



Methyltransferase FkbM domain  
(Methyltransf\_21, N=2)

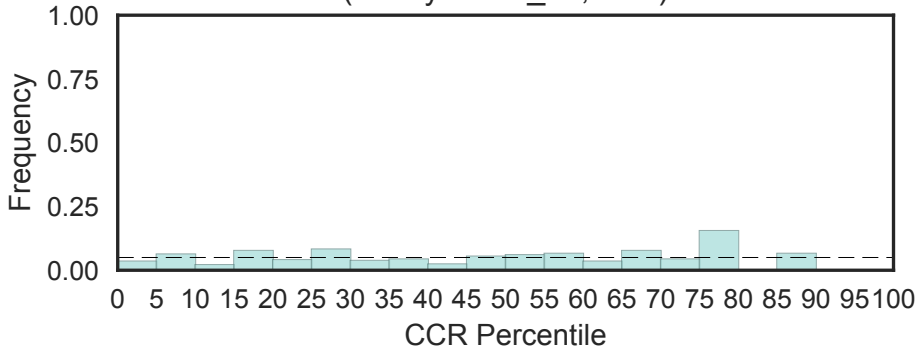

Methyltransferase domain  
(Methyltransf\_22, N=2)

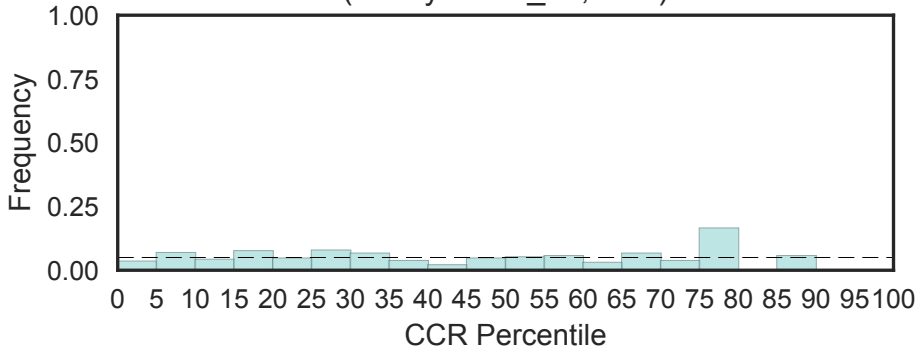

# Methyltransferase domain

(Methyltransf\_23, N=22)

Fisher's OR: 0.267; Bonferroni p-val: 1

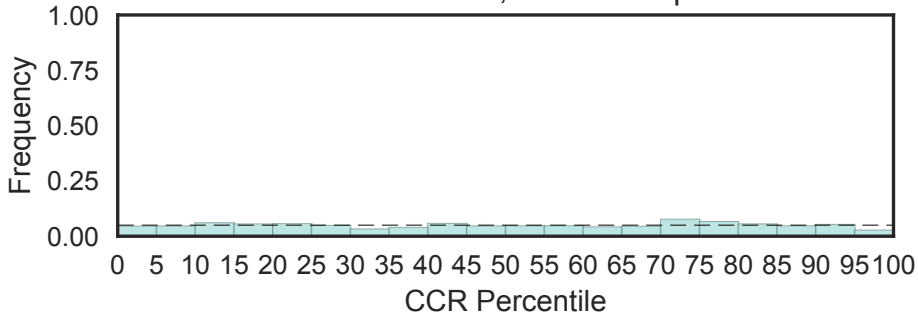

Methyltransferase domain  
(Methyltransf\_24, N=3)  
Fisher's OR: 0; Bonferroni p-val: 1

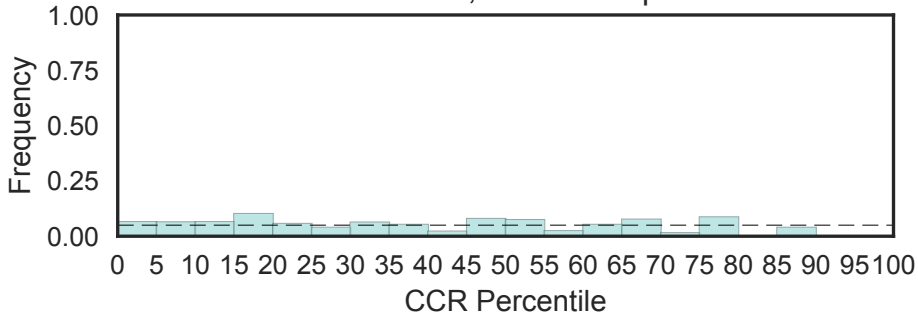

# Methyltransferase domain

(Methyltransf\_25, N=35)

Fisher's OR: 0.591; Bonferroni p-val: 1

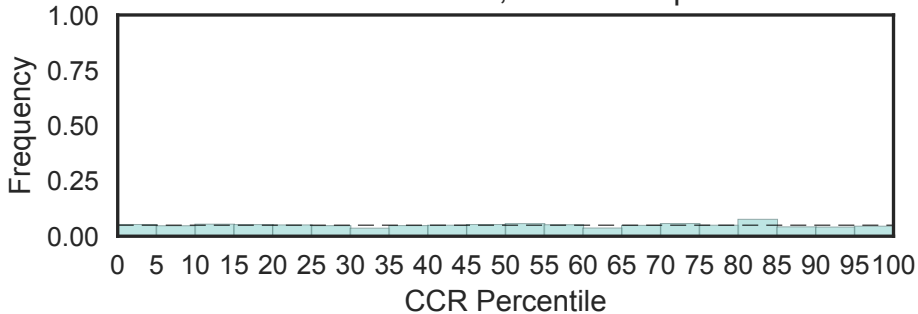

Putative S-adenosyl-L-methionine-dependent methyltransferase  
(Methyltransf\_28, N=1)

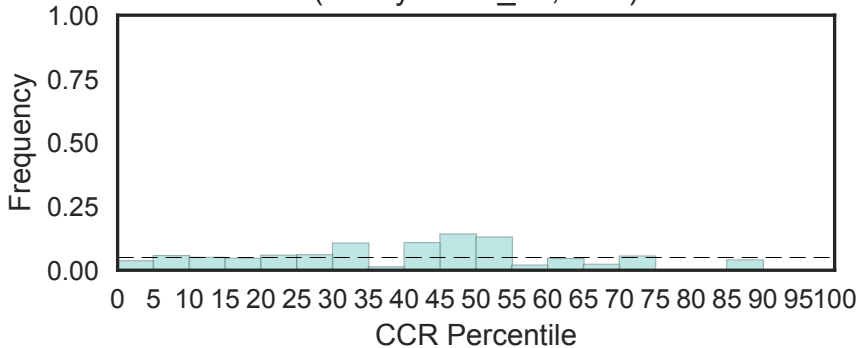

Putative S-adenosyl-L-methionine-dependent methyltransferase  
(Methyltransf\_29, N=1)

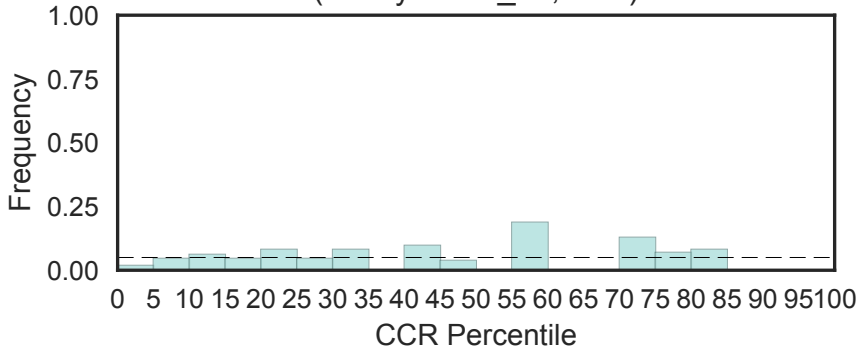

O-methyltransferase  
(Methyltransf\_3, N=4)

Fisher's OR: 0; Bonferroni p-val: 1

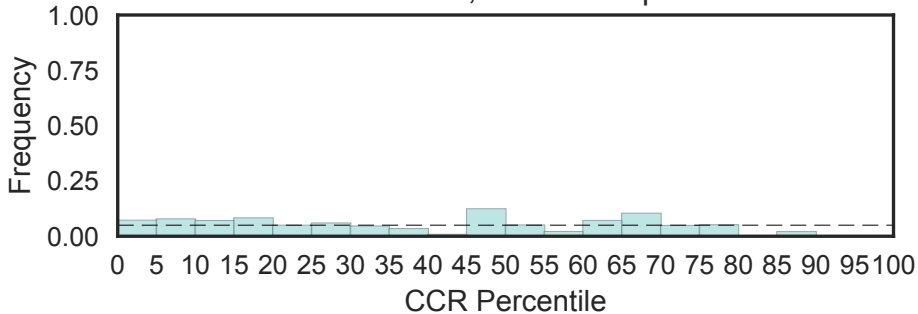



# Methyltransferase domain

(Methyltransf\_31, N=26)

Fisher's OR: 0.196; Bonferroni p-val: 1

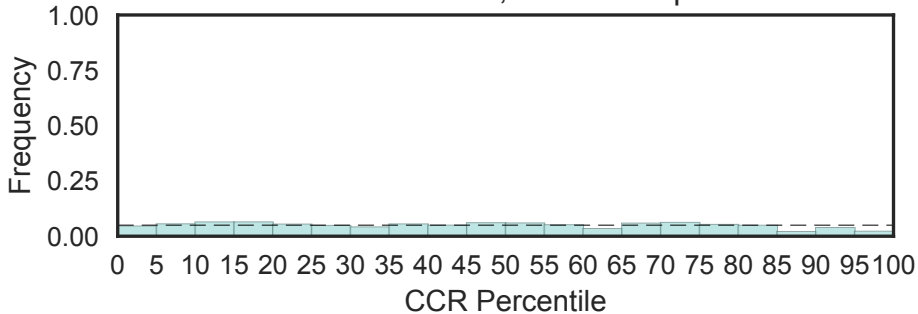

Methyltransferase domain  
(Methyltransf\_32, N=3)  
Fisher's OR: 0; Bonferroni p-val: 1

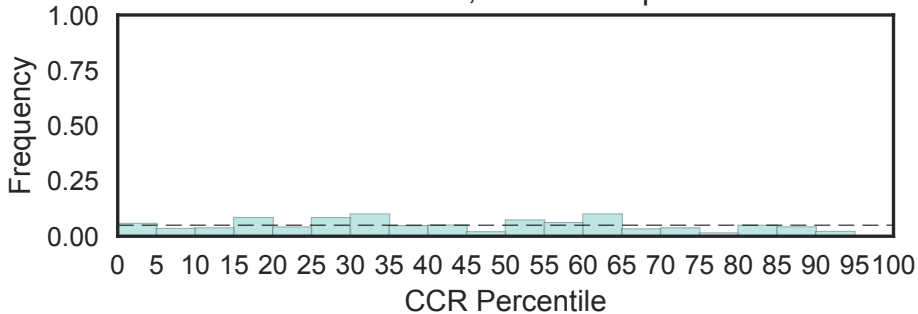

Putative methyltransferase  
(Methyltransf\_4, N=3)  
Fisher's OR: 0; Bonferroni p-val: 1

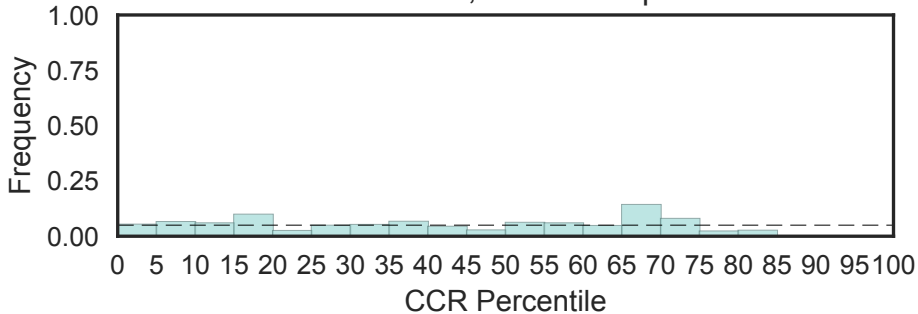

MraW methylase family  
(Methyltransf\_5, N=1)

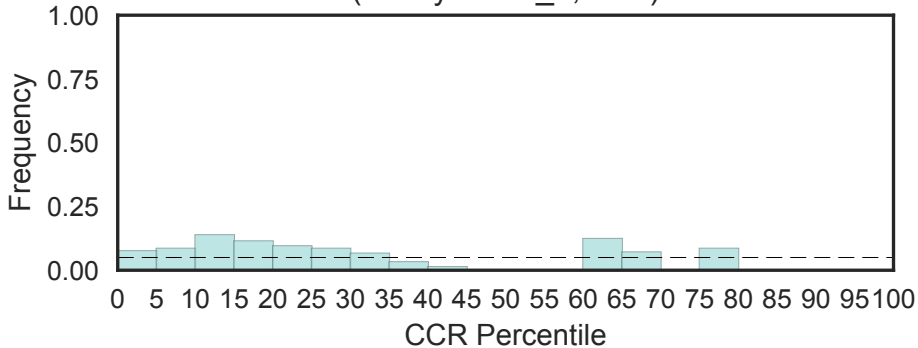

Hypothetical methyltransferase  
(Methyltransf\_8, N=6)

Fisher's OR: 0; Bonferroni p-val: 1

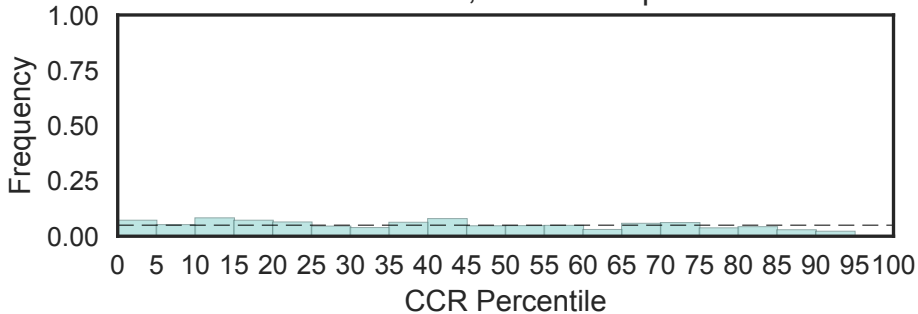

Protein of unknown function (DUF1698)  
(Methyltransf\_9, N=3)

Fisher's OR: 3.41; Bonferroni p-val: 1

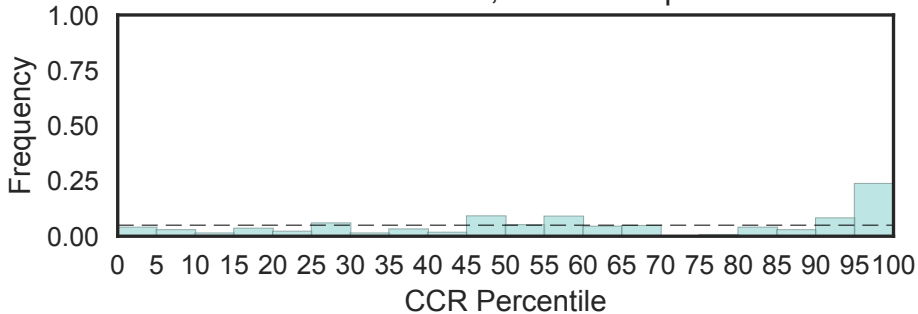

Farnesoic acid O-methyl transferase  
(Methyltransf\_FA, N=1)

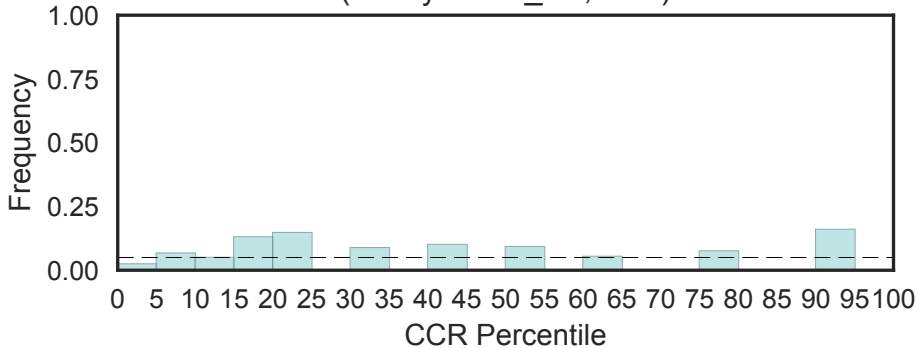

AdoMet dependent proline di-methyltransferase  
(Methyltransf\_PK, N=2)

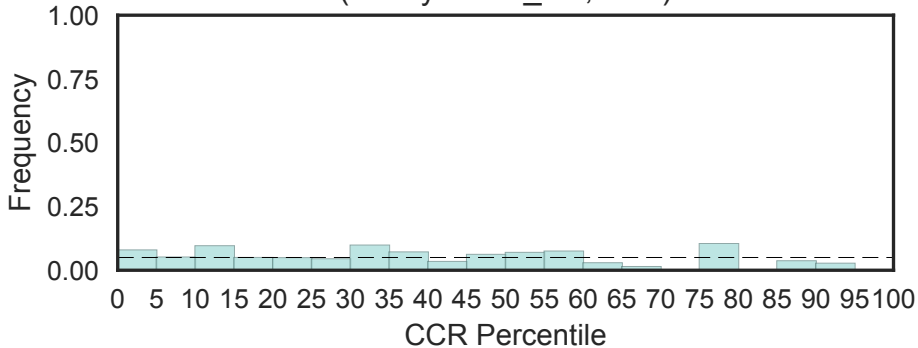



Putative RNA methyltransferase  
(Methyltrn\_RNA\_3, N=1)

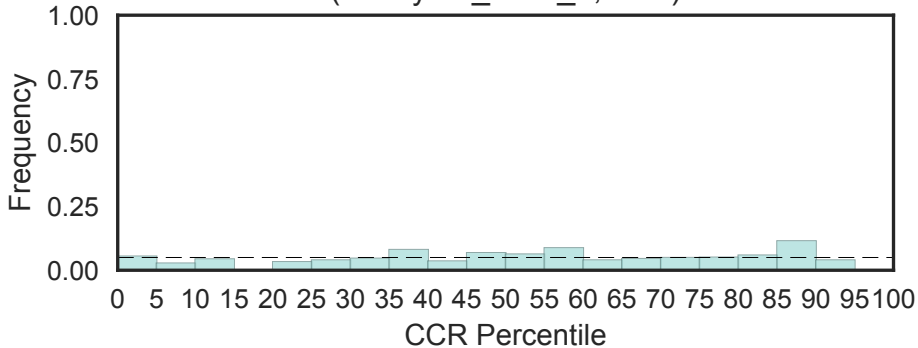

Magnesium chelatase, subunit ChII  
(Mg\_chelatase, N=9)

Fisher's OR: 0; Bonferroni p-val: 1

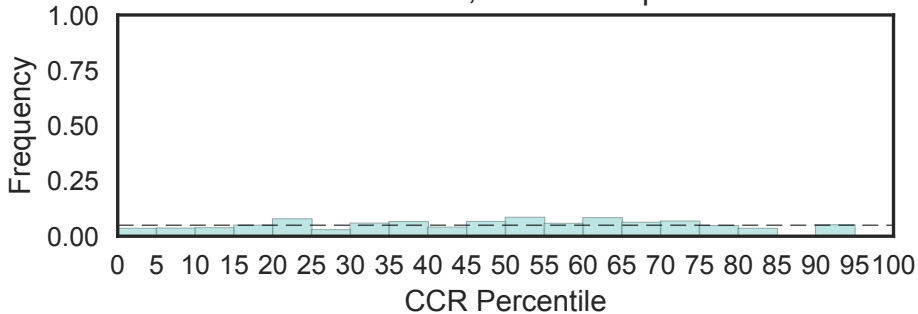

Magnesium transporter NIPA  
(Mg\_trans\_NIPA, N=6)  
Fisher's OR: 0.692; Bonferroni p-val: 1

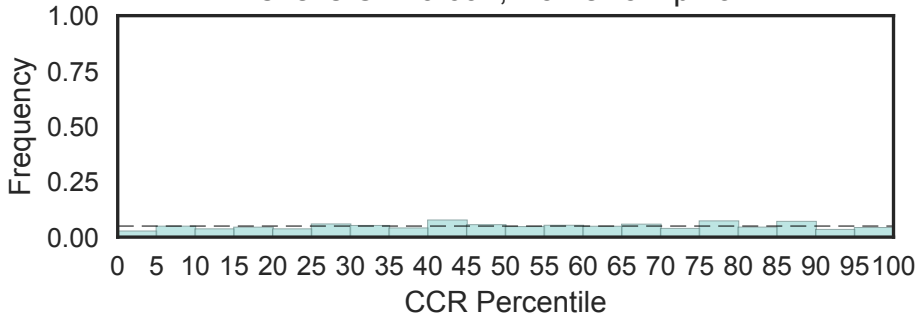

MgsA AAA+ ATPase C terminal  
(MgsA\_C, N=1)

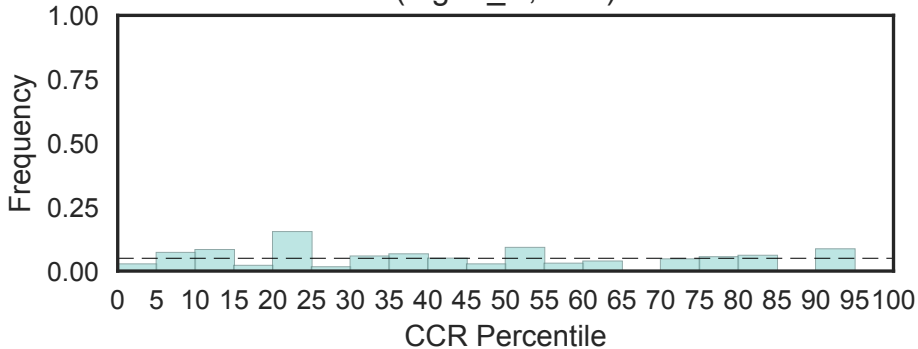

Divalent cation transporter  
(MgtE, N=6)

Fisher's OR: 1.9; Bonferroni p-val: 1

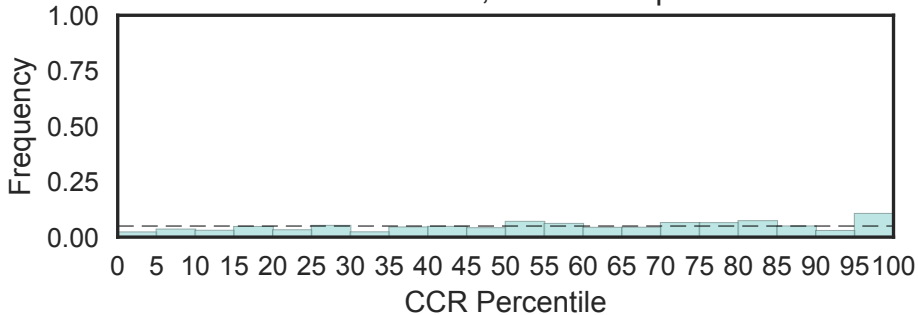

Colon cancer-associated protein Mic1-like  
(Mic1, N=2)

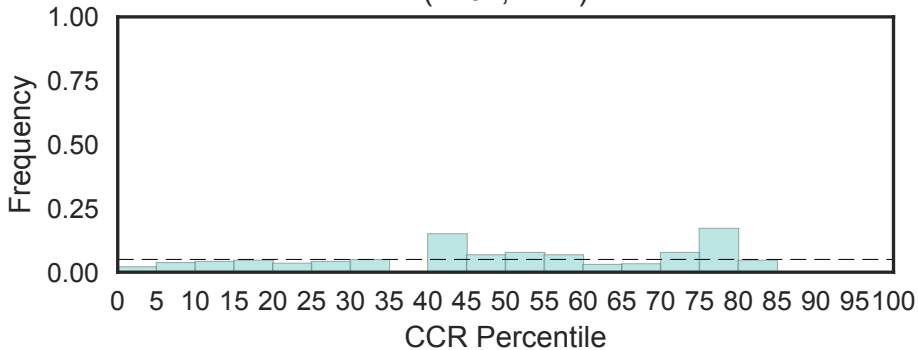

Microcephalin protein  
(Microcephalin, N=1)

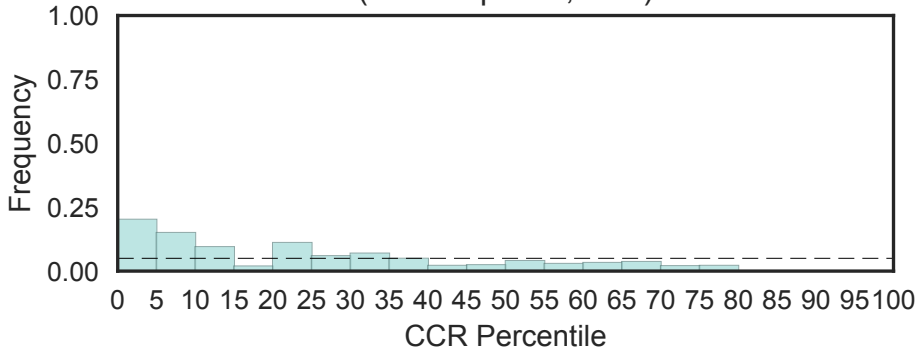

Microtubule binding  
(Microtub\_bd, N=42)

Fisher's OR: 1.9; Bonferroni p-val: 1

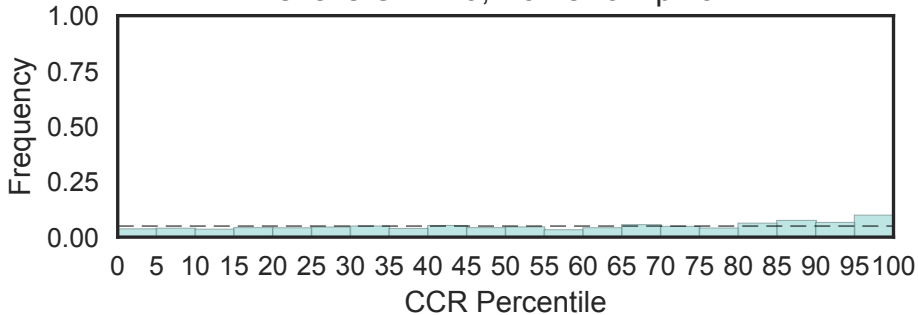



Kinesin-associated microtubule-binding  
(Microtub\_bind, N=1)

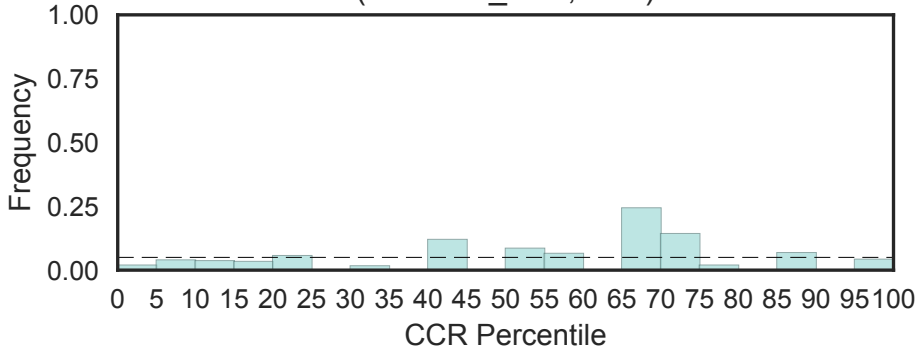

# Mitochondrial and peroxisomal fission factor Mff (Miff, N=1)

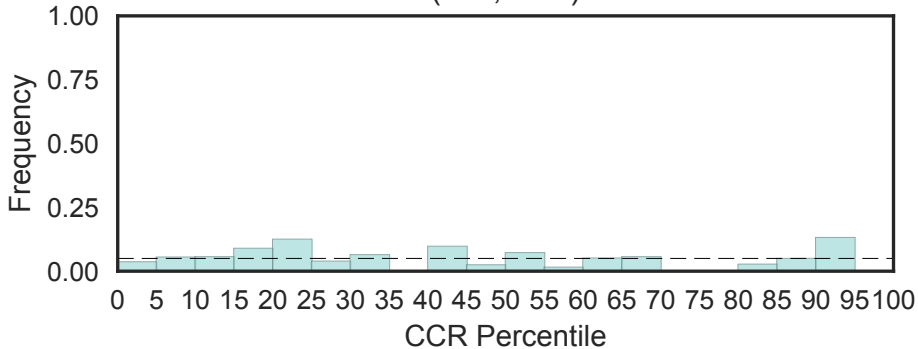

# Mitoguardin (Miga, N=2)

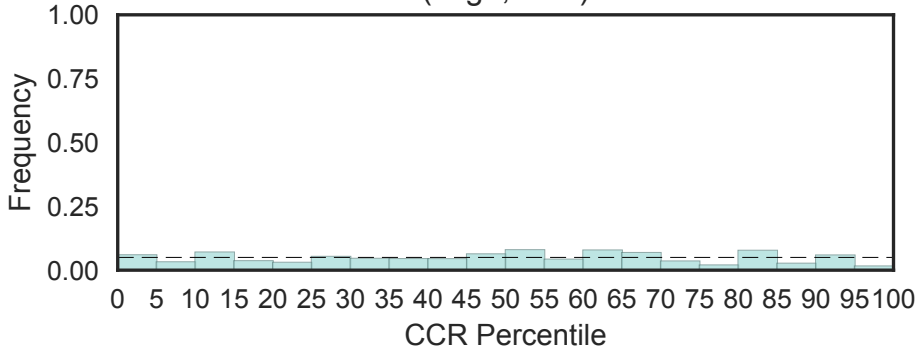

Kinesin associated protein  
(Milton, N=3)

Fisher's OR: 0; Bonferroni p-val: 1

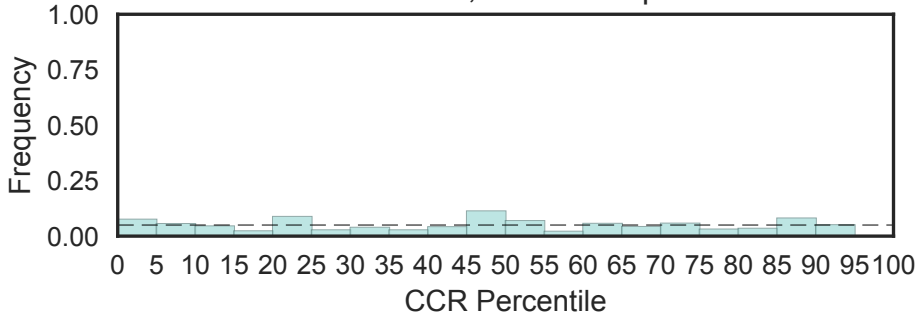

ATPase MipZ  
(MipZ, N=3)

Fisher's OR: 0; Bonferroni p-val: 1

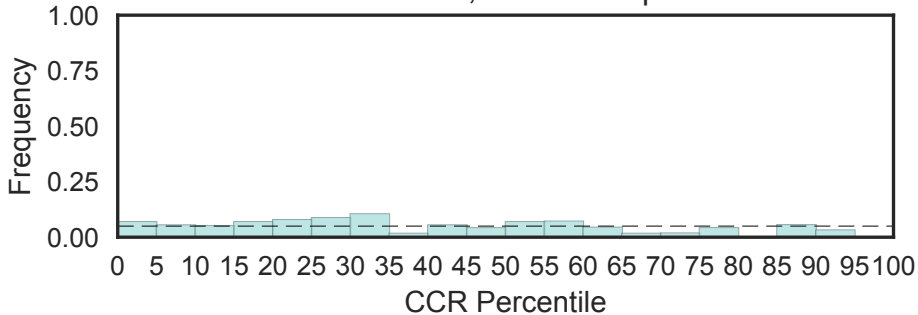

Mis12 protein  
(Mis12, N=1)

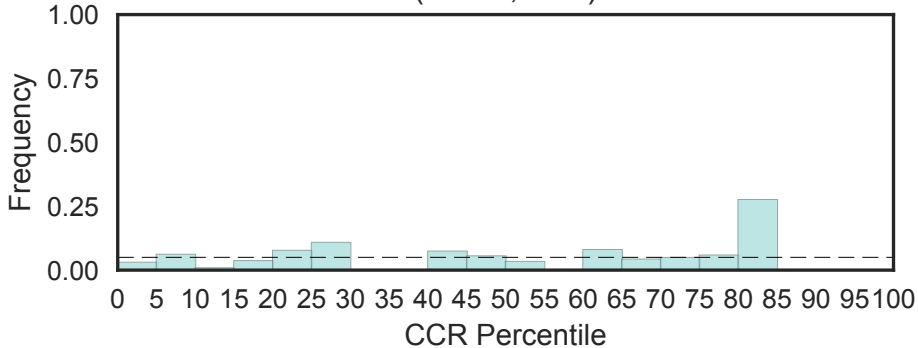

Kinetochores protein Mis14 like  
(Mis14, N=1)

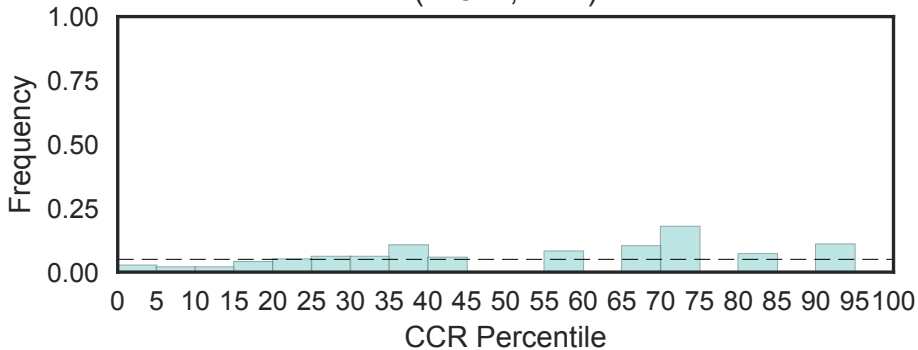

# Misato Segment II tubulin-like domain

(Misat\_Tub\_SegII, N=3)

Fisher's OR: 0; Bonferroni p-val: 1

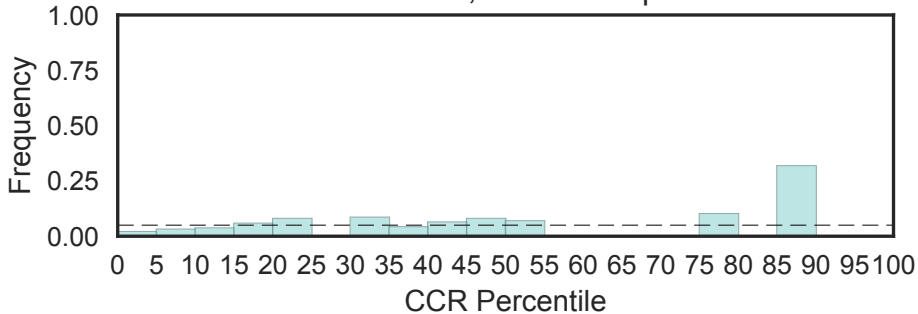



Maintenance of mitochondrial structure and function  
(MitMem\_reg, N=4)

Fisher's OR: 2.07; Bonferroni p-val: 1

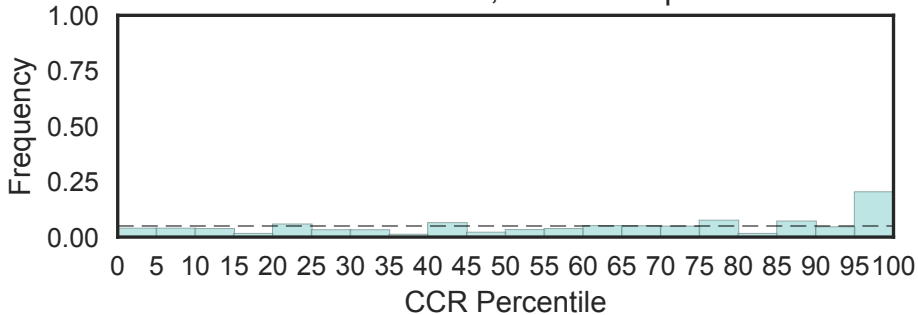

Mitochondrial proteolipid  
(Mit\_proteolip, N=1)

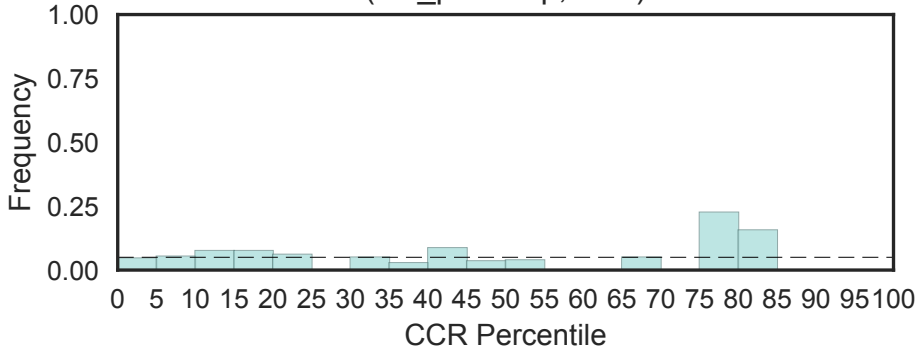

Iron-containing outer mitochondrial membrane protein N-terminus  
(MitoNEET\_N, N=3)

Fisher's OR: 1.72; Bonferroni p-val: 1

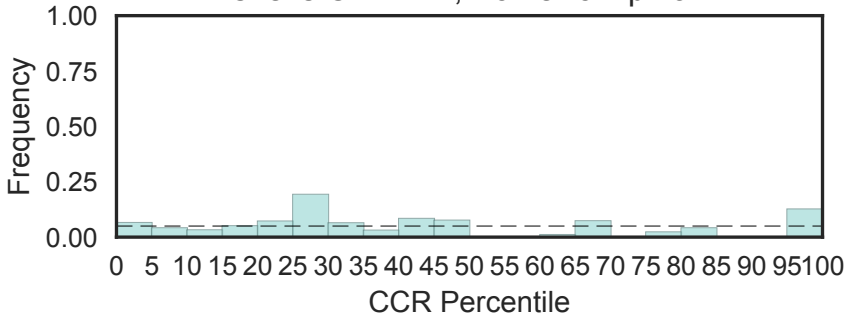

Mitochondrial carrier protein  
(Mito\_carr, N=139)

Fisher's OR: 0.429; Bonferroni p-val: 0.383

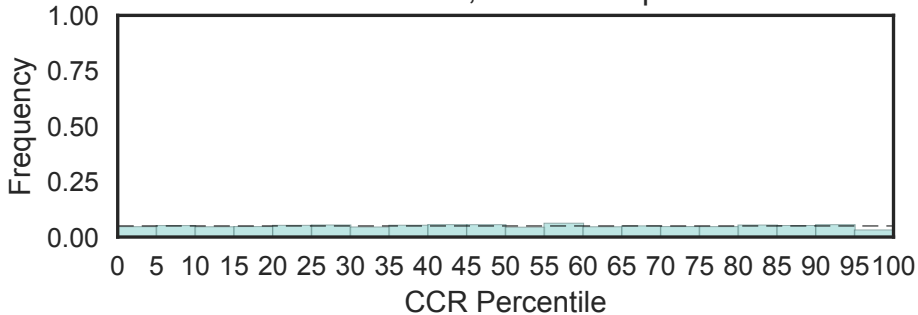

# Mitochondrial fission regulator

(Mito\_fiss\_reg, N=3)

Fisher's OR: 0.363; Bonferroni p-val: 1

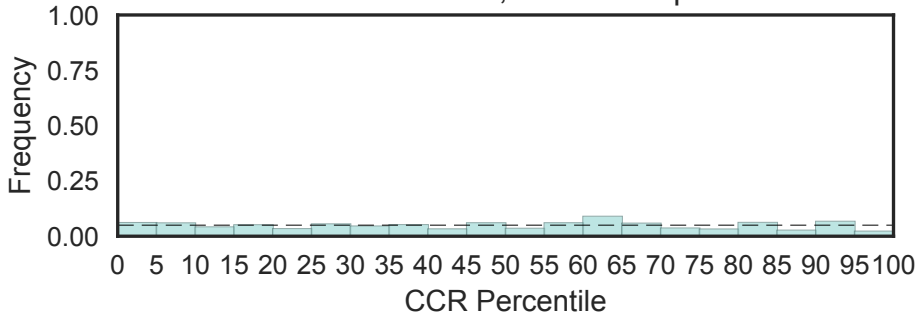

Mitochondrial morphogenesis regulator  
(Mito\_morph\_reg, N=1)

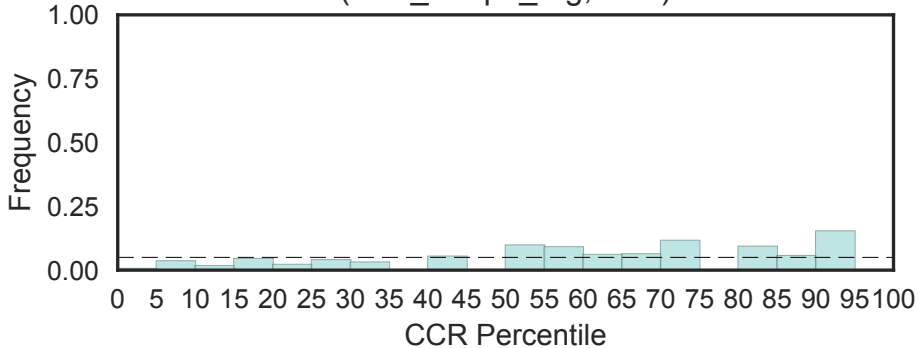

Mitochondrial ribosomal protein L55  
(Mitoc\_L55, N=1)

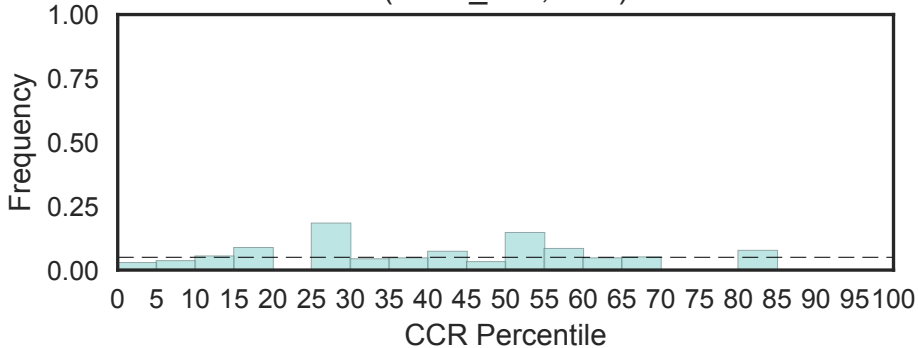

Mitochondrial inner membrane protein  
(Mitofilin, N=2)

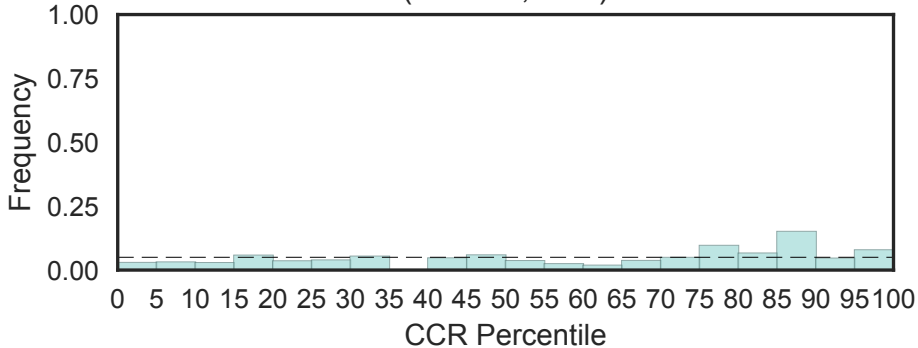



# Myelodysplasia-myeloid leukemia factor 1-interacting protein (Mlf1IP, N=2)

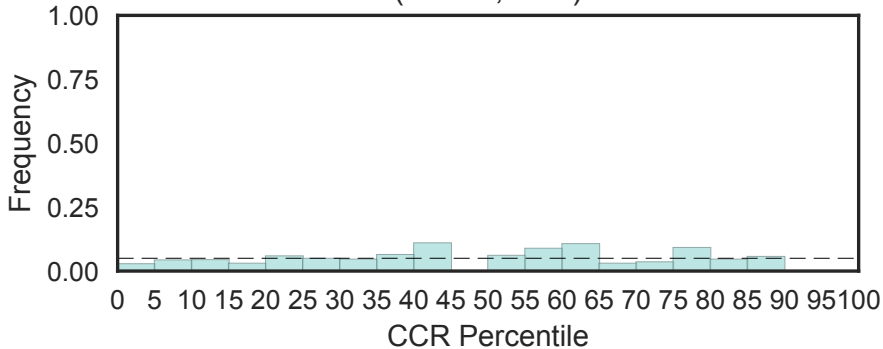

DNA mismatch repair protein Mlh1 C-terminus  
(Mlh1\_C, N=1)

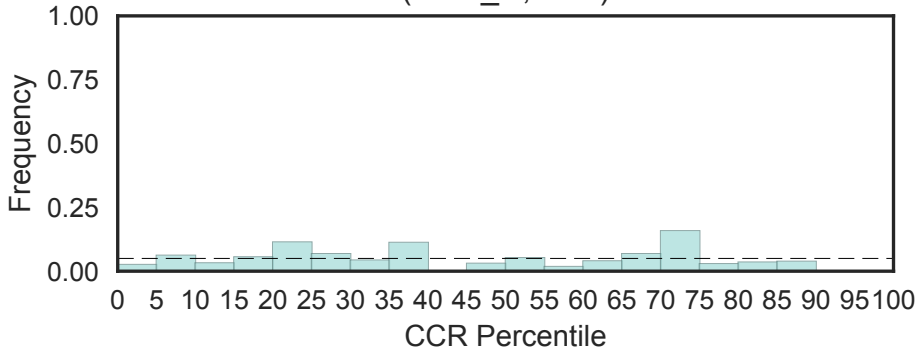

MmgE/PrpD family  
(MmgE\_PrpD, N=1)

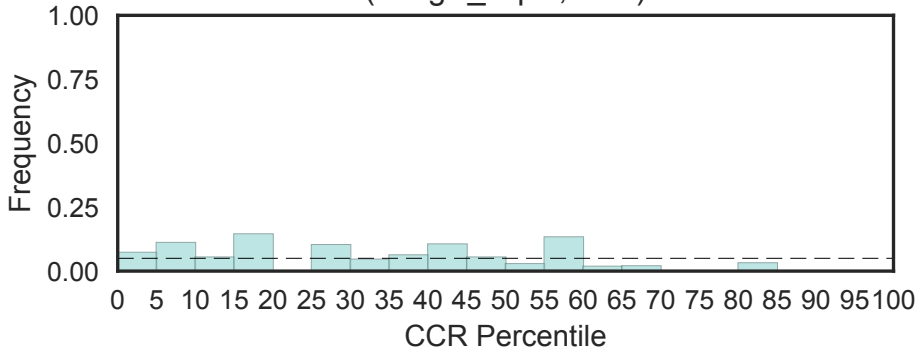

Mitochondrial matrix Mmp37  
(Mmp37, N=1)

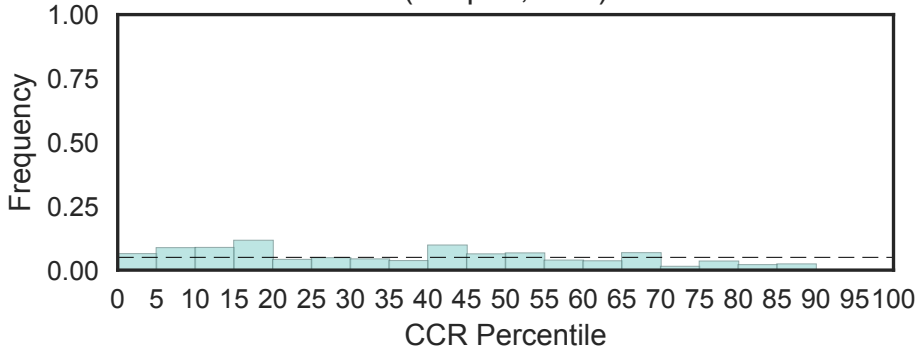

Mnd1 family  
(Mnd1, N=2)

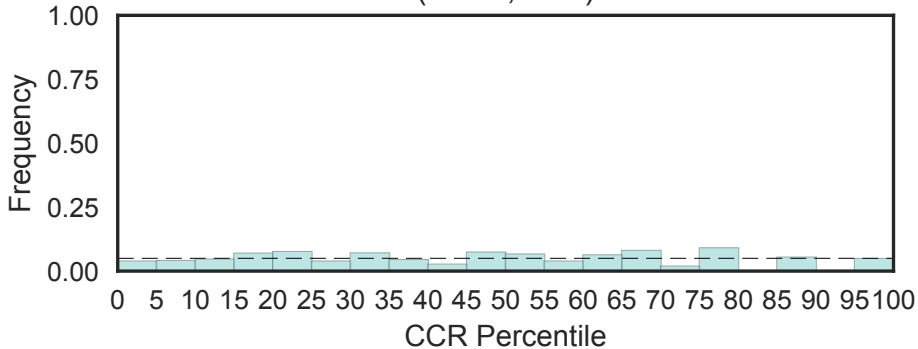

MnmE helical domain  
(MnmE\_helical, N=1)

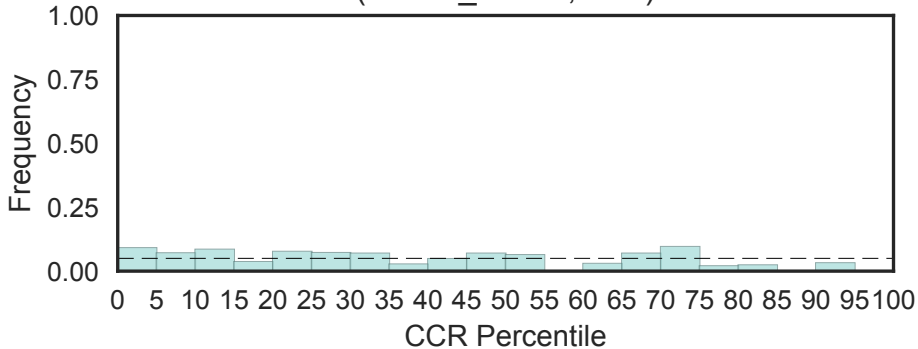

Mo-co oxidoreductase dimerisation domain  
(Mo-co\_dimer, N=1)

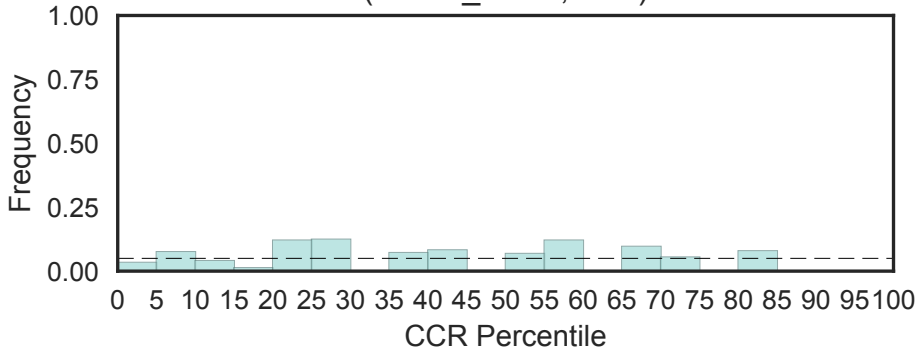

Mo25-like  
(Mo25, N=2)

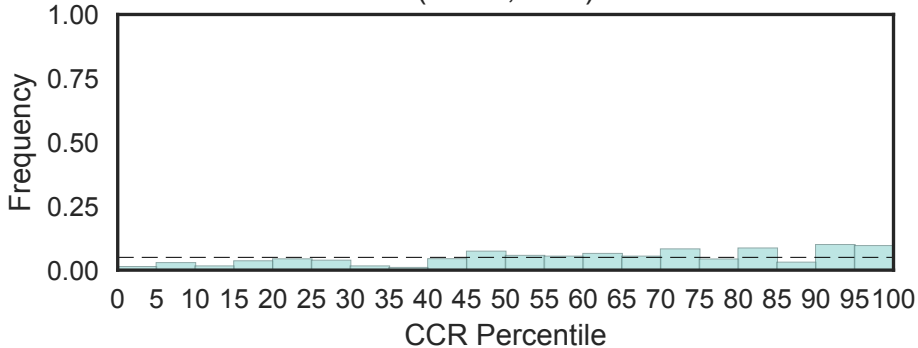



Probable molybdopterin binding domain  
(MoCF\_biosynth, N=4)

Fisher's OR: 1.36; Bonferroni p-val: 1

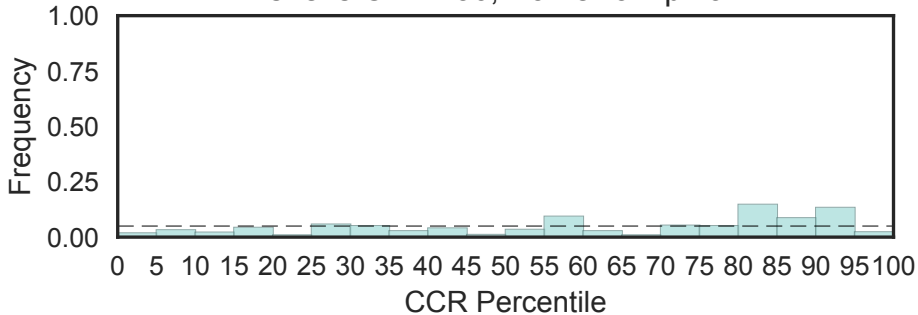

MoaE protein  
(MoaE, N=1)

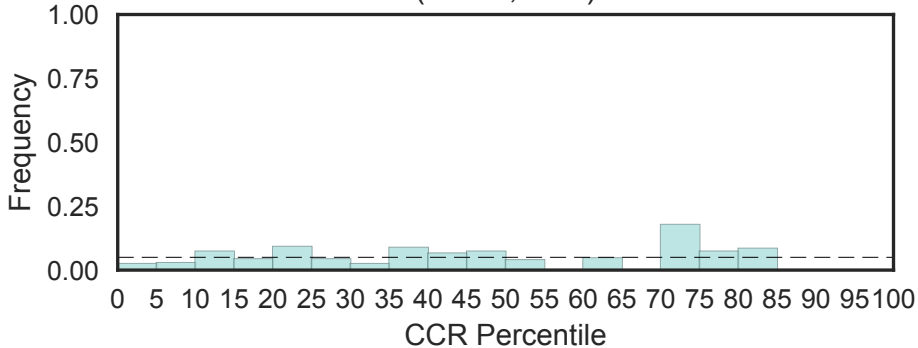

Mob1/phocein family  
(Mob1\_phocein, N=8)

Fisher's OR: 1.81; Bonferroni p-val: 1

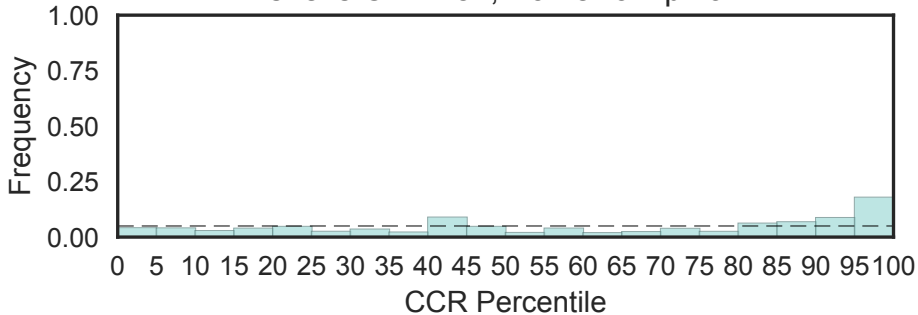

# Molybdenum Cofactor Synthesis C

(Mob\_synth\_C, N=1)

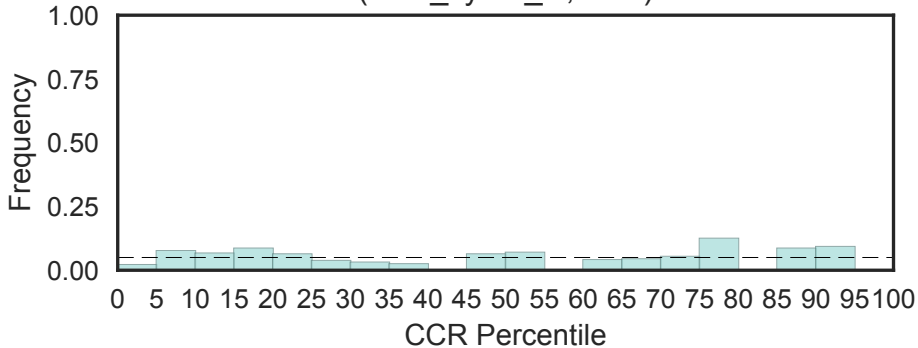

Modifier of rudimentary (Mod(r)) protein  
(Mod\_r, N=4)

Fisher's OR: 0.487; Bonferroni p-val: 1

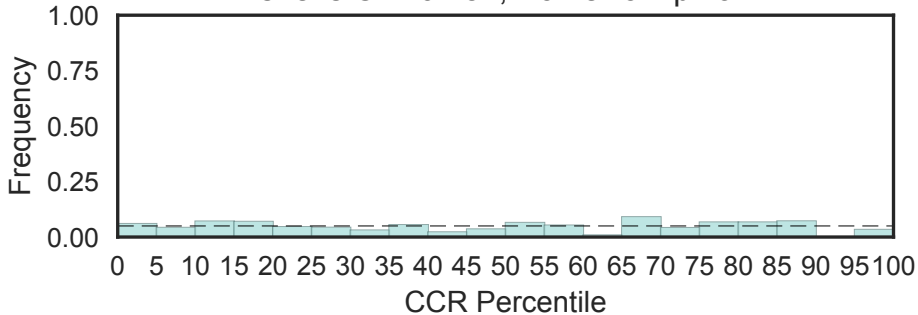

MoeA C-terminal region (domain IV)  
(MoeA\_C, N=1)

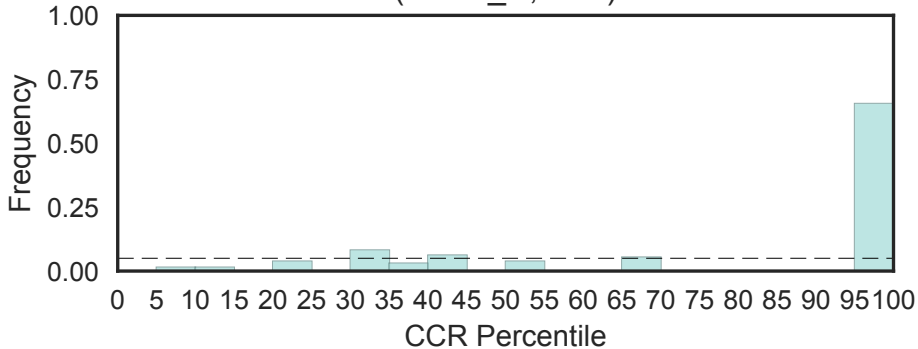

MoeA N-terminal region (domain I and II)  
(MoeA\_N, N=1)

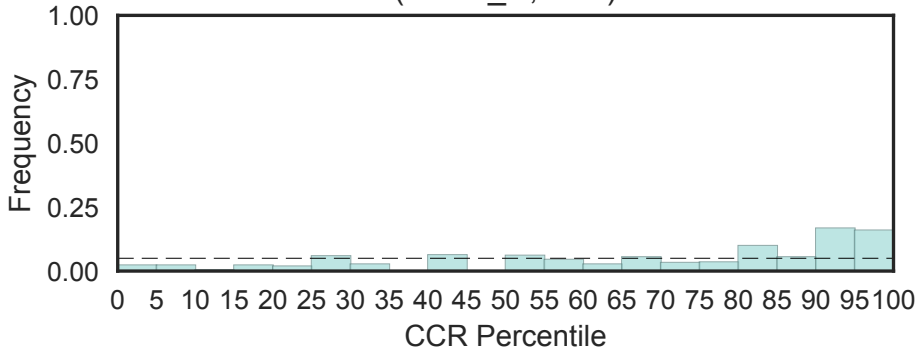

Ran-interacting Mog1 protein  
(Mog1, N=1)

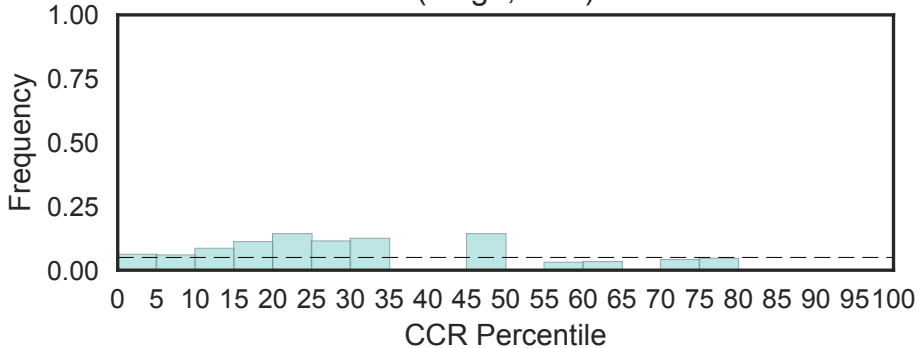



# Molybdopterin oxidoreductase (Molybdopterin, N=1)

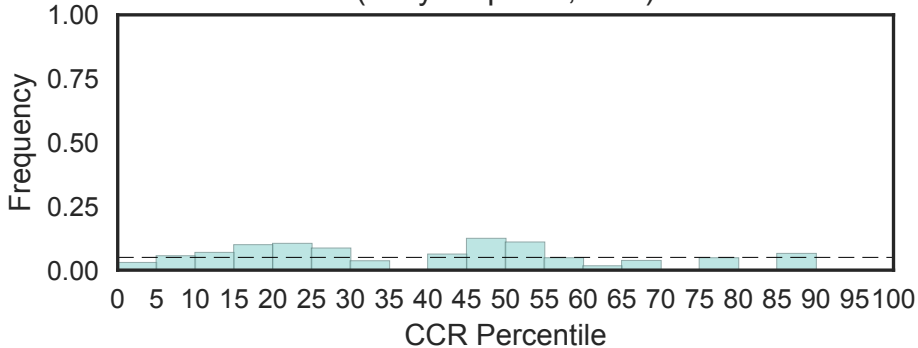

Trafficking protein Mon1  
(Mon1, N=2)

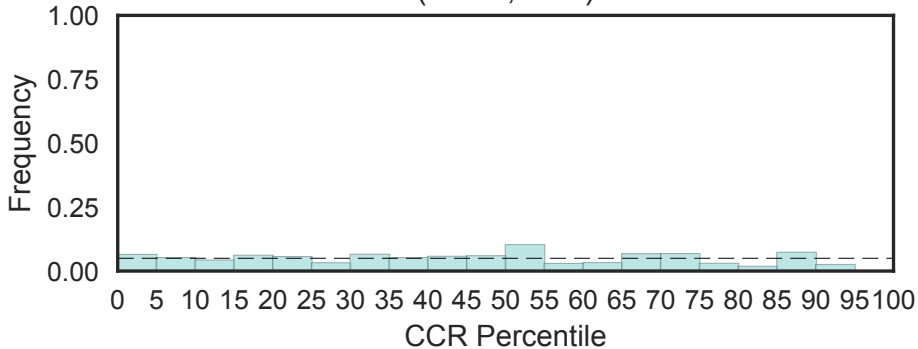

C-terminal region of Mon2 protein  
(Mon2\_C, N=1)

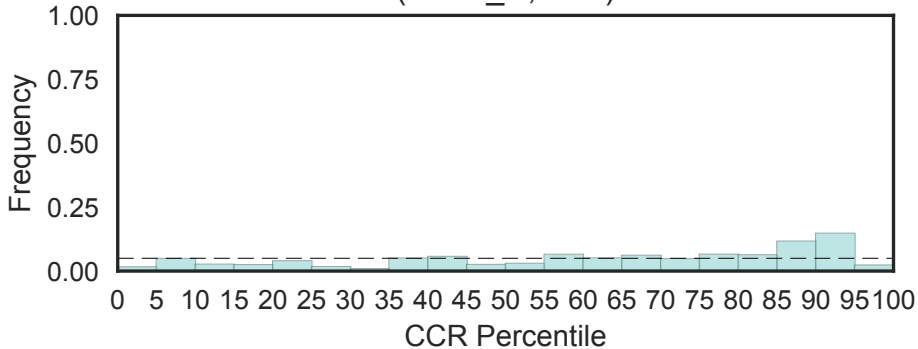

MSP (Major sperm protein) domain  
(Motile\_Sperm, N=4)  
Fisher's OR: 3.03; Bonferroni p-val: 1

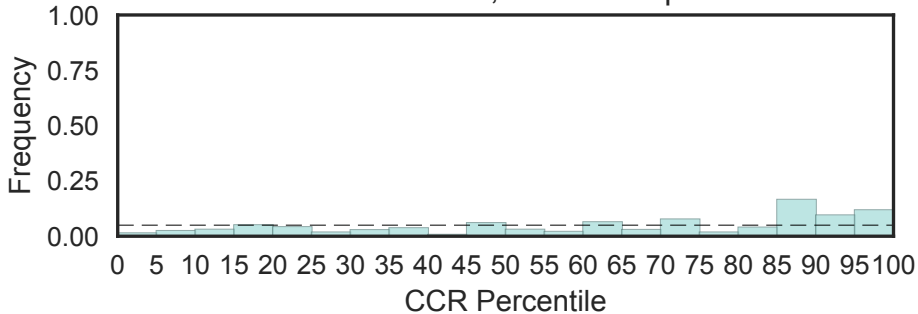

Motilin/ghrelin-associated peptide  
(Motilin\_assoc, N=2)

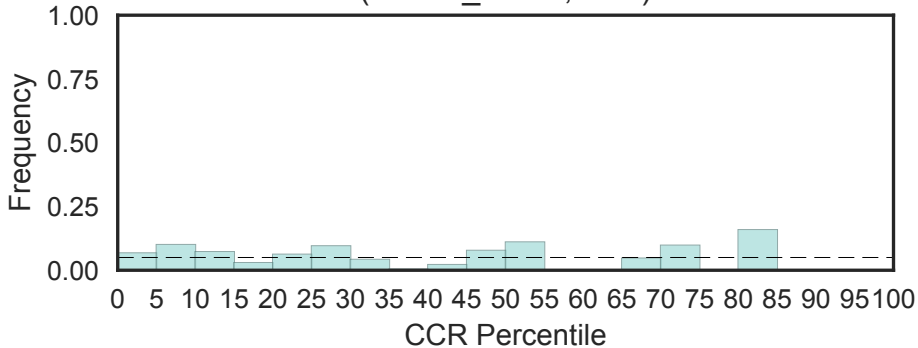

Motilin/ghrelin  
(Motilin\_ghrelin, N=2)

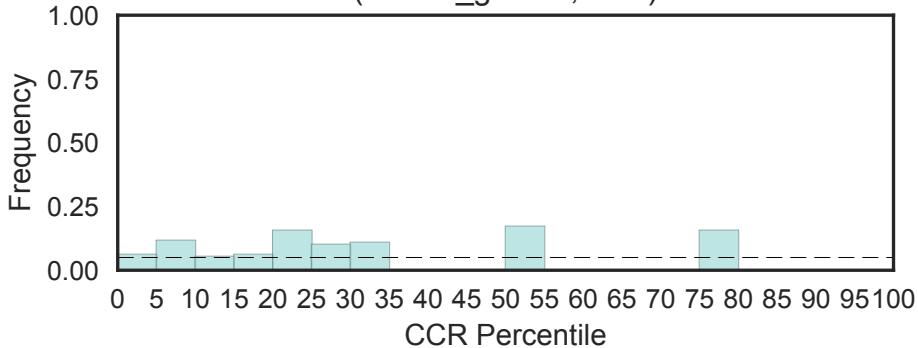

Mpp10 protein  
(Mpp10, N=1)

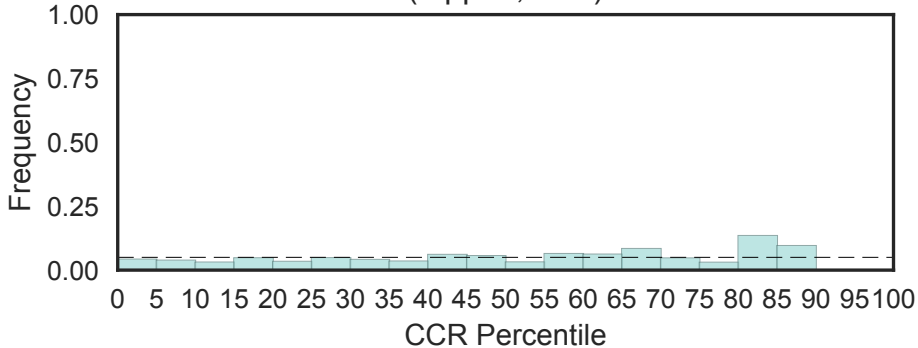

Mpv17 / PMP22 family  
(Mpv17\_PMP22, N=5)

Fisher's OR: 0; Bonferroni p-val: 1

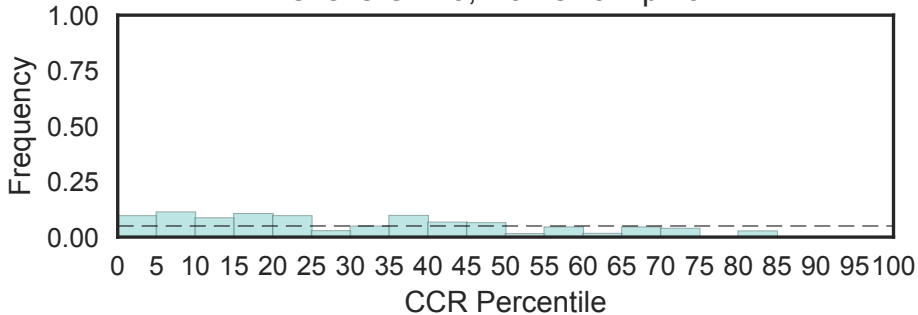



Mre11 DNA-binding presumed domain  
(Mre11\_DNA\_bind, N=1)

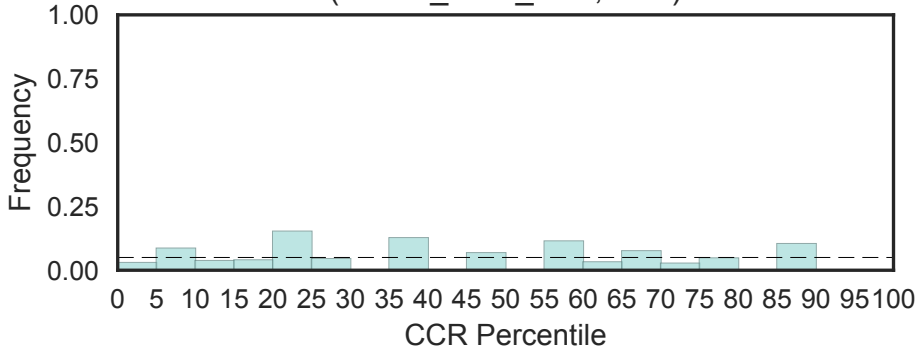

MreB/Mbl protein  
(MreB\_Mbl, N=14)

Fisher's OR: 1.22; Bonferroni p-val: 1

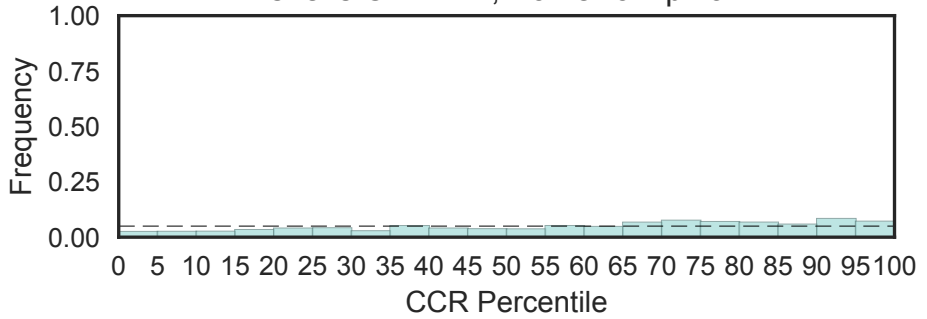

Mss4 protein  
(Mss4, N=1)

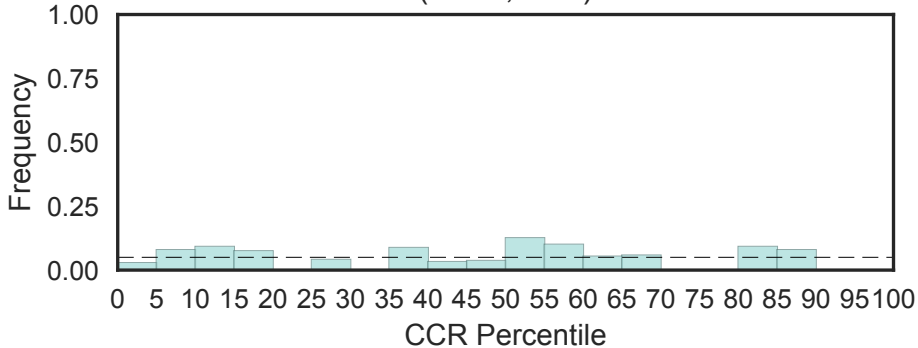

C terminal SARAH domain of Mst1  
(Mst1\_SARAH, N=2)

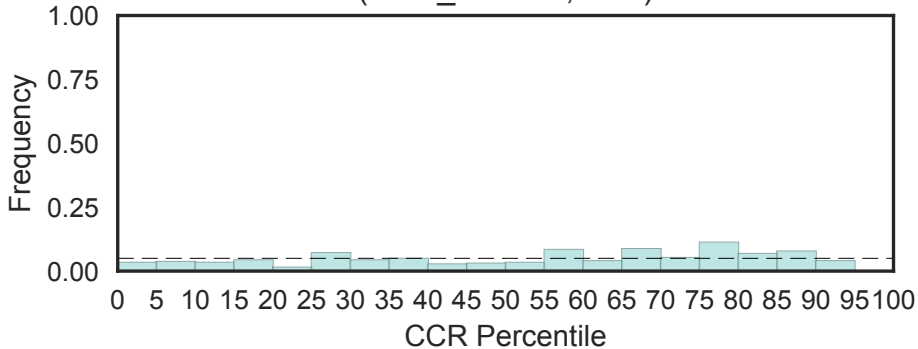

Sugar efflux transporter for intercellular exchange  
(MtN3\_slv, N=2)

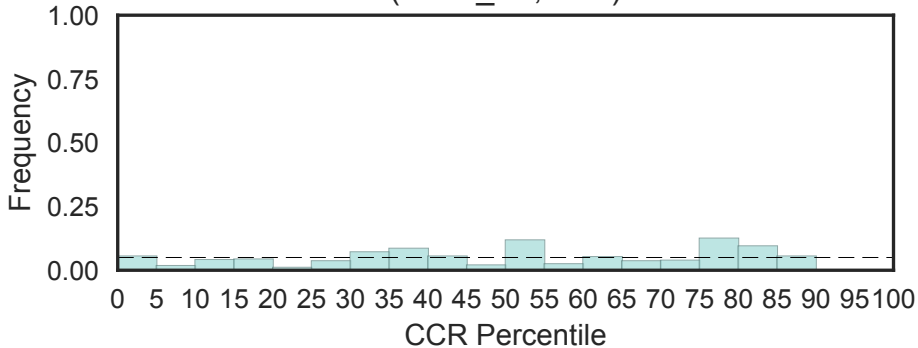

Mitochondrial ATP synthase B chain precursor (ATP-synt\_B)  
(Mt\_ATP-synt\_B, N=1)

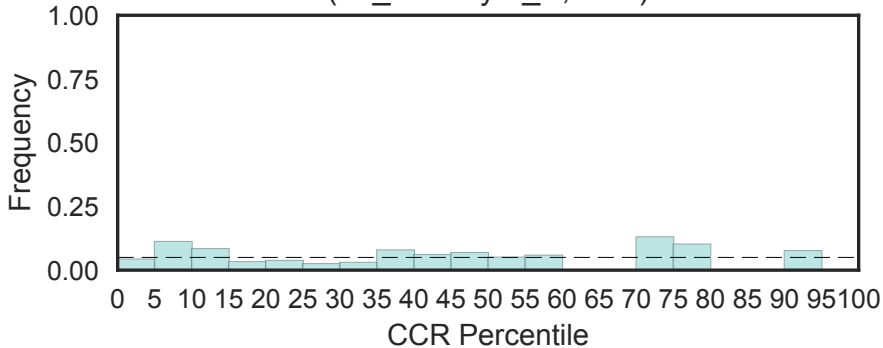

ATP synthase D chain, mitochondrial (ATP5H)  
(Mt\_ATP-synt\_D, N=1)

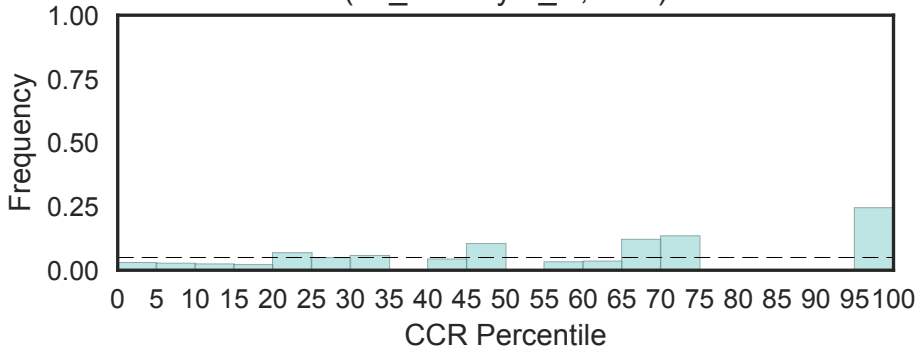

Tricarboxylate carrier  
(Mtc, N=5)

Fisher's OR: 0; Bonferroni p-val: 1

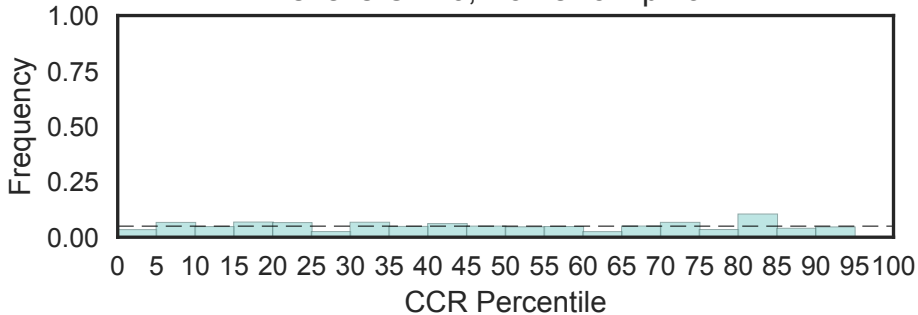



# Polycomb-like MTF2 factor 2

(Mtf2\_C, N=3)

Fisher's OR: 13.5; Bonferroni p-val: 1

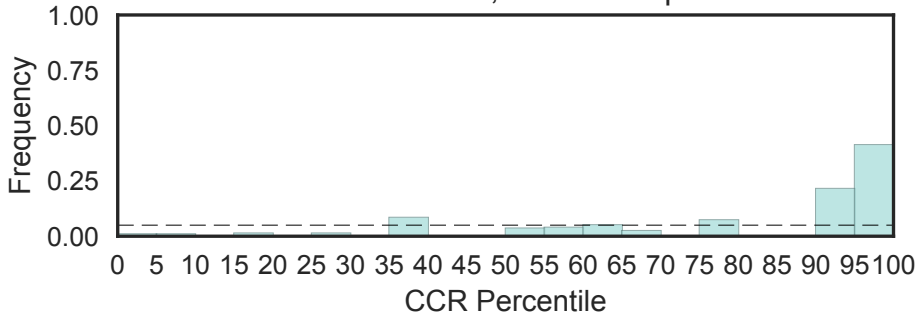

Golgi 4-transmembrane spanning transporter  
(Mtp, N=4)

Fisher's OR: 1.25; Bonferroni p-val: 1

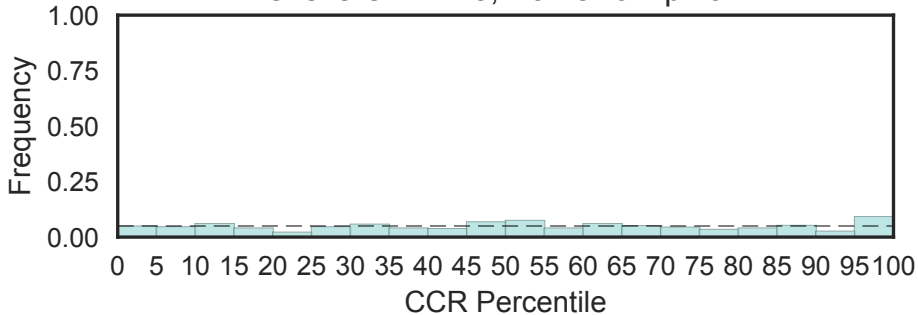

Cell-membrane associated Mucin15  
(Mucin15, N=1)

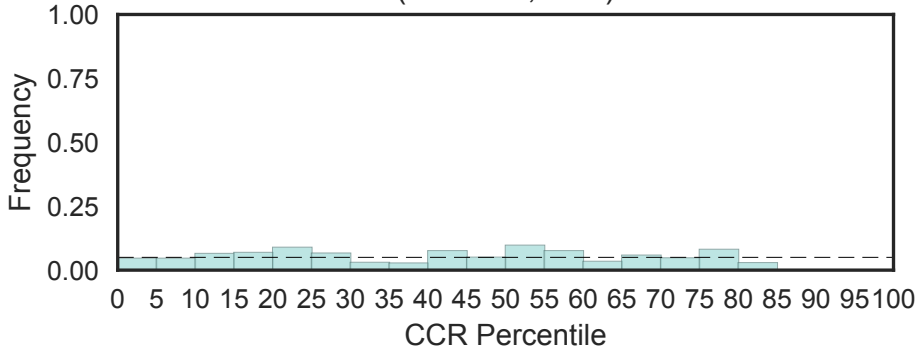

Mucin-2 protein WxxW repeating region  
(Mucin2\_WxxW, N=12)

Fisher's OR: 0.364; Bonferroni p-val: 1

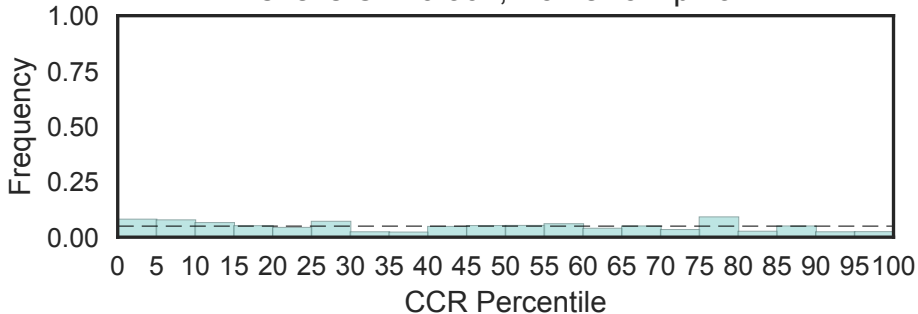

# Insulin-resistance promoting peptide in skeletal muscle (Musclin, N=1)

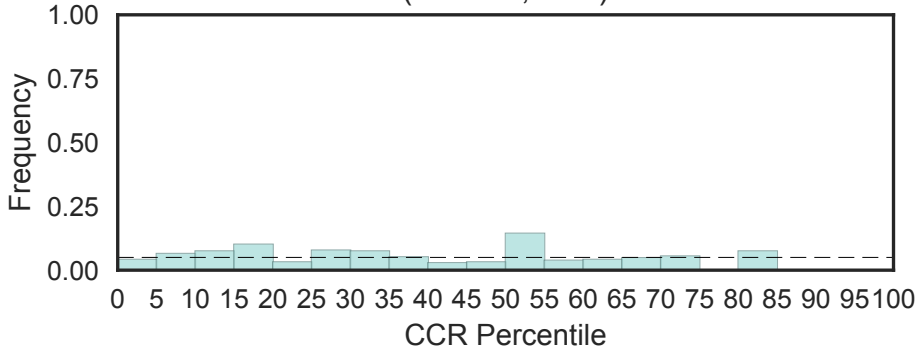

Muskelin N-terminus  
(Muskelin\_N, N=1)

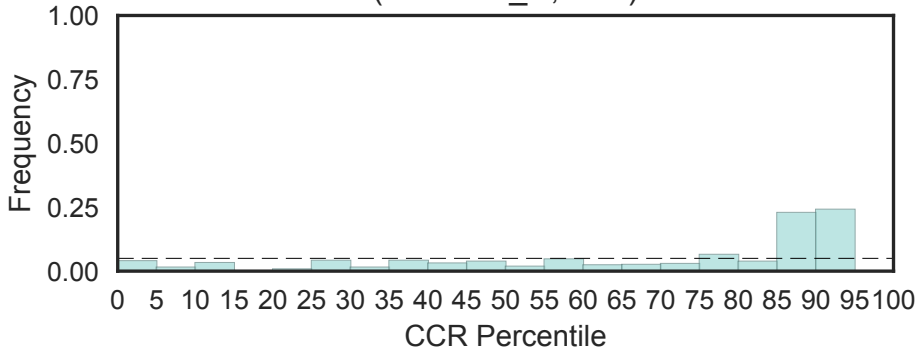

# Musculoskeletal, temporally activated-embryonic nuclear protein 1 (Mustang, N=2)

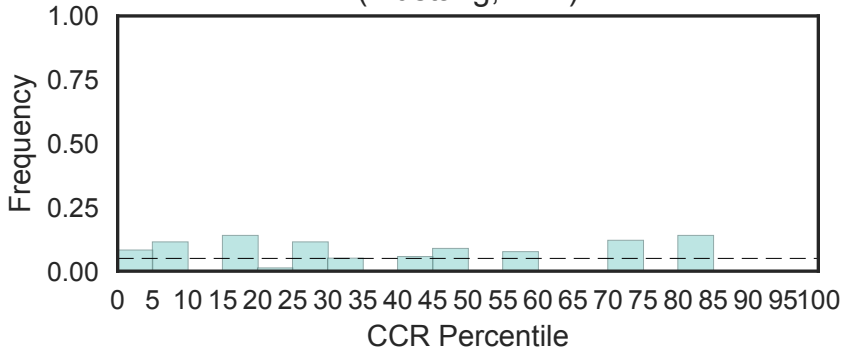

Mut7-C RNase domain  
(Mut7-C, N=1)

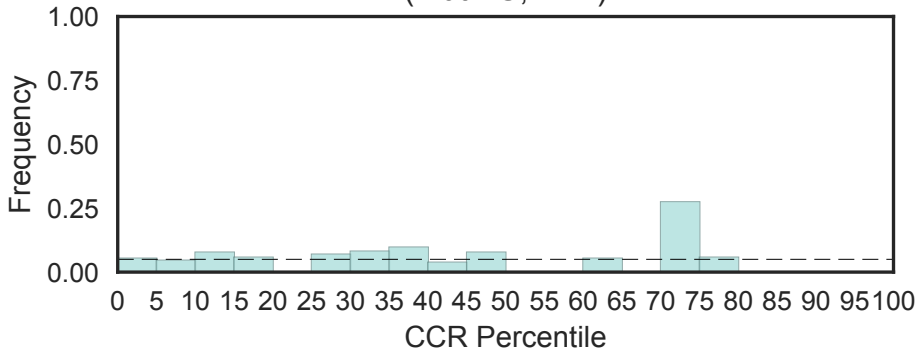



MutL C terminal dimerisation domain  
(MutL\_C, N=2)

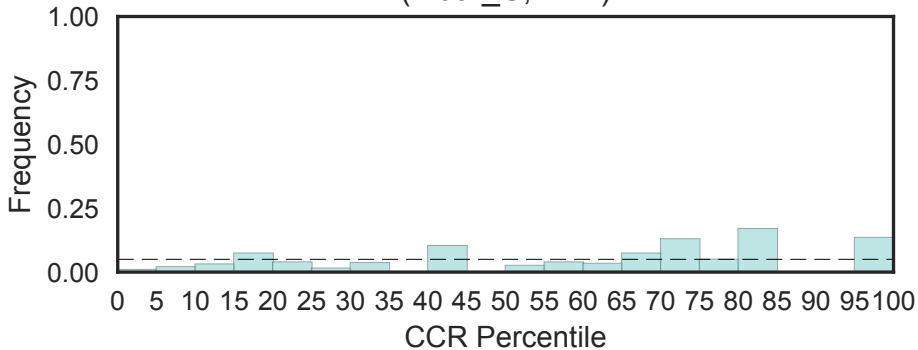

MutS domain I  
(MutS\_I, N=3)

Fisher's OR: 0; Bonferroni p-val: 1

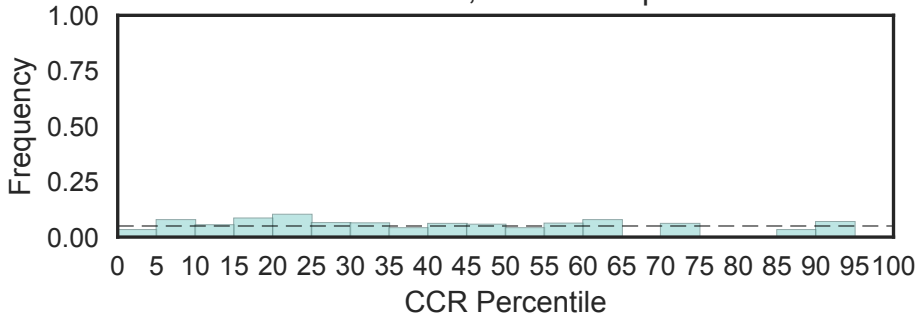

MutS domain II  
(MutS\_II, N=4)

Fisher's OR: 0; Bonferroni p-val: 1

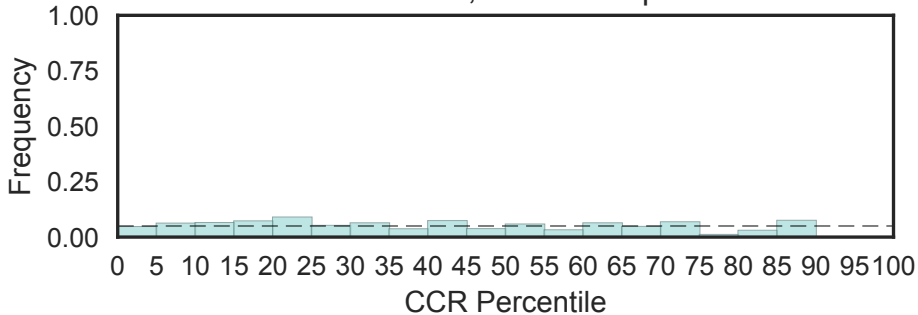

MutS domain III  
(MutS\_III, N=5)

Fisher's OR: 0; Bonferroni p-val: 1

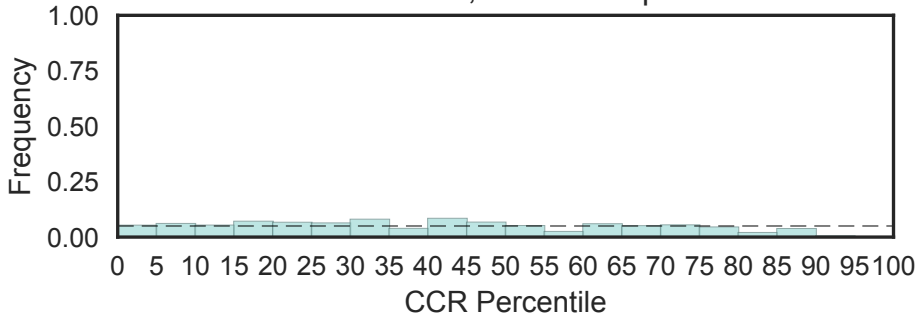

# MutS family domain IV

(MutS\_IV, N=4)

Fisher's OR: 0; Bonferroni p-val: 1

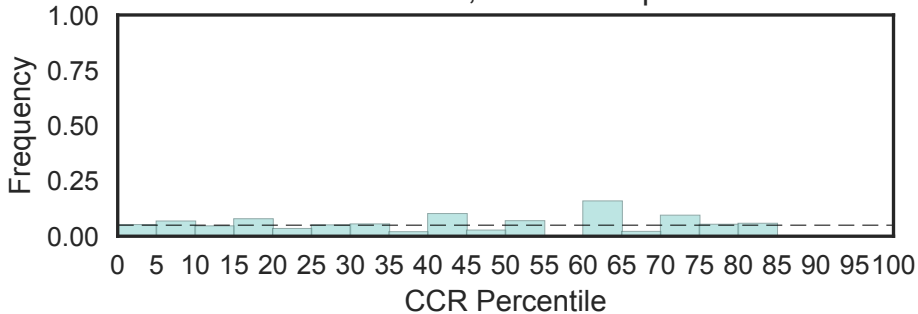

MutS domain V  
(MutS\_V, N=5)

Fisher's OR: 0; Bonferroni p-val: 1

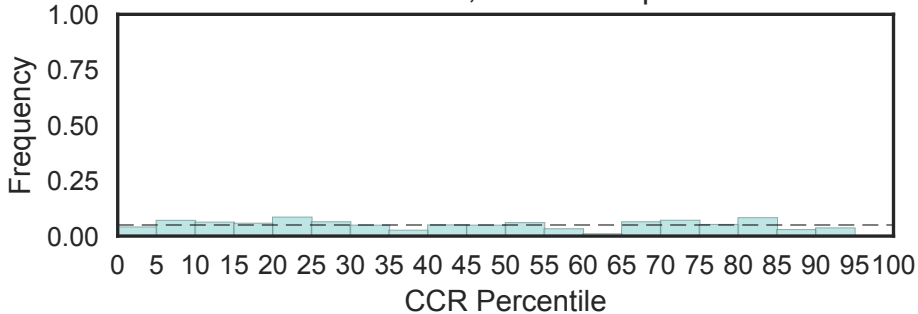

Organelle biogenesis, Muted-like protein  
(Muted, N=2)

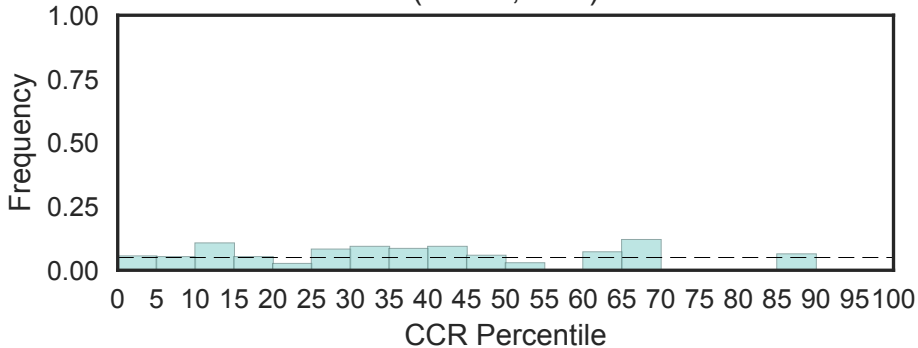

MyTH4 domain  
(MyTH4, N=12)

Fisher's OR: 1.02; Bonferroni p-val: 1

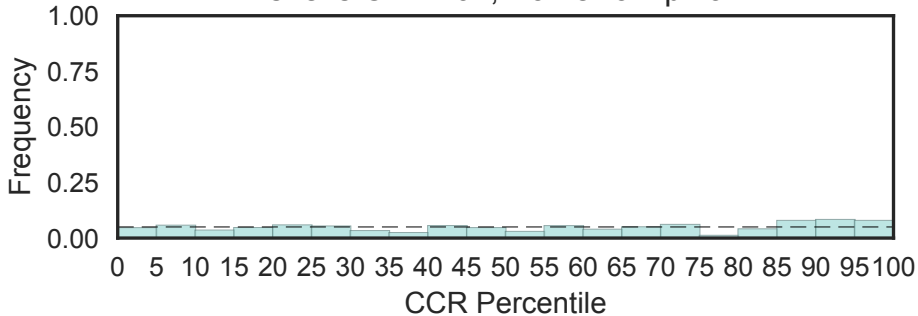



pre-mRNA splicing factor component  
(Myb\_Cef, N=1)

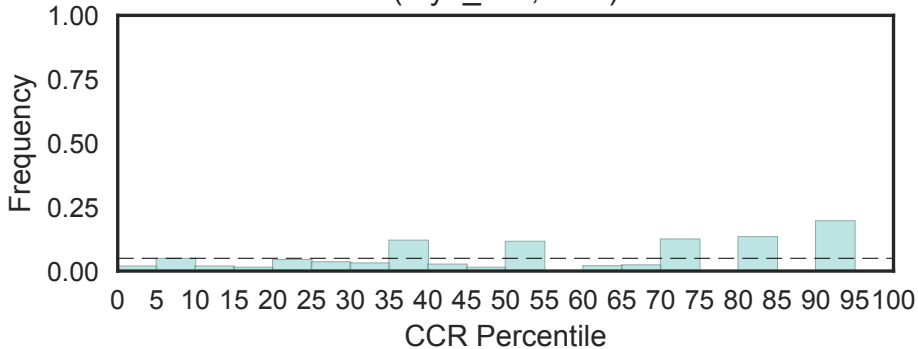

Rap1 Myb domain  
(Myb\_DNA-bind\_2, N=1)

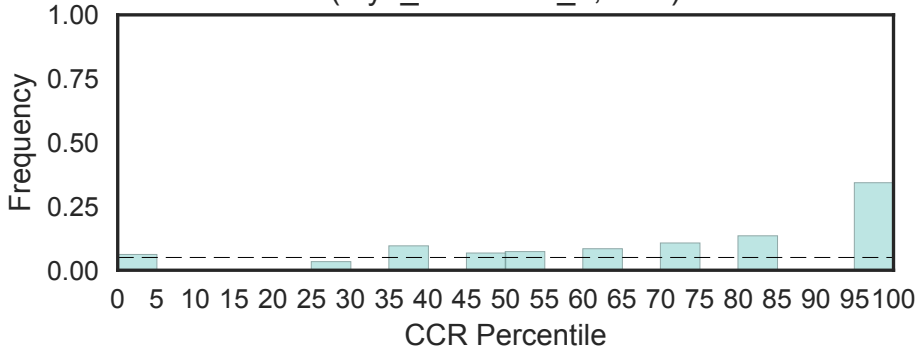

Myb/SANT-like DNA-binding domain  
(Myb\_DNA-bind\_4, N=10)  
Fisher's OR: 2.08; Bonferroni p-val: 1

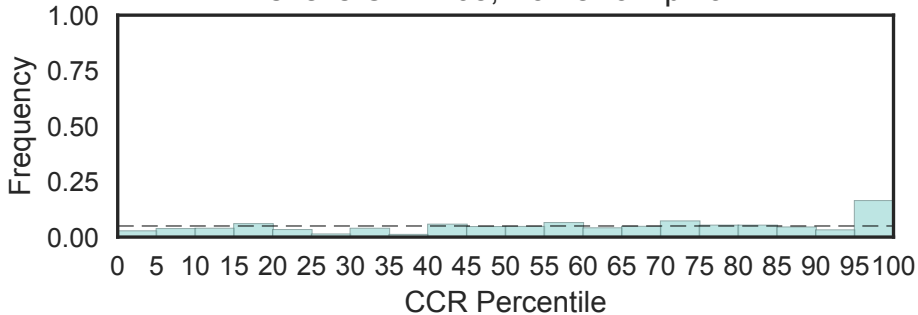

Myb/SANT-like DNA-binding domain  
(Myb\_DNA-bind\_5, N=6)  
Fisher's OR: 5.52; Bonferroni p-val: 1

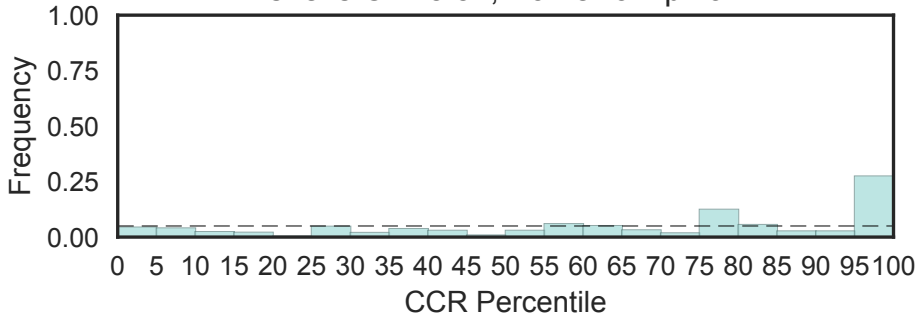

Myb-like DNA-binding domain  
(Myb\_DNA-bind\_6, N=19)

Fisher's OR: 4.97; Bonferroni p-val: 0.029

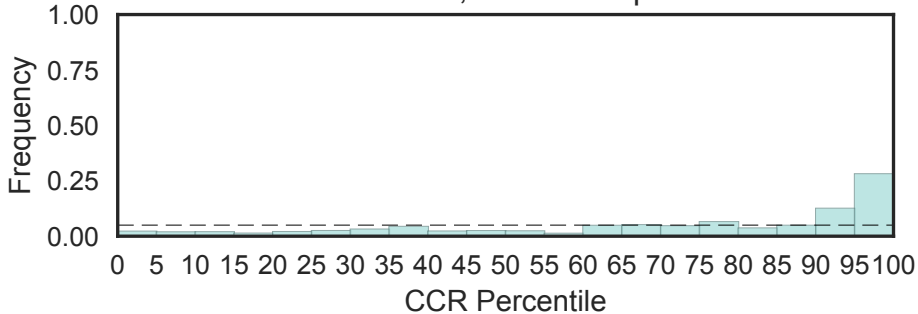

Myb DNA-binding like  
(Myb\_DNA-bind\_7, N=1)

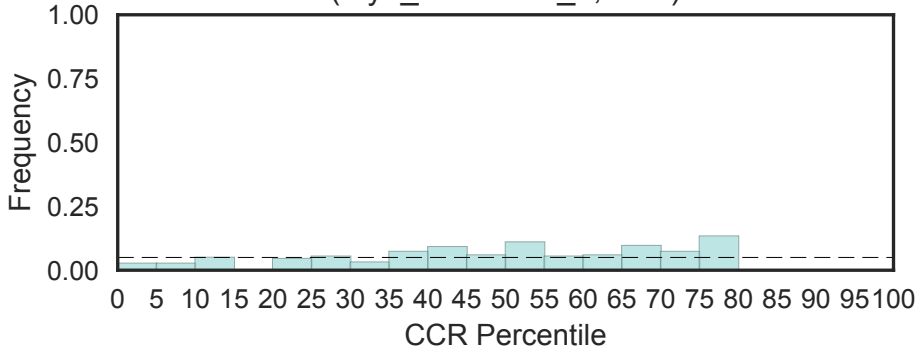

Myb-like DNA-binding domain  
(Myb\_DNA-binding, N=40)

Fisher's OR: 5.67; Bonferroni p-val: 1.16e-05

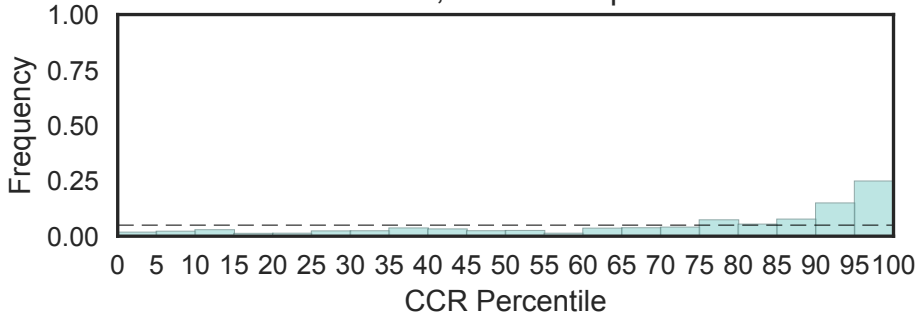

Myc leucine zipper domain  
(Myc-LZ, N=1)

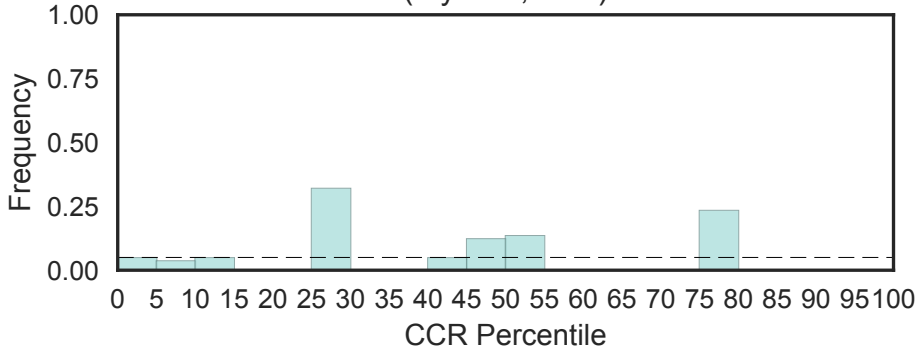



Myc amino-terminal region  
(Myc\_N, N=4)

Fisher's OR: 0.825; Bonferroni p-val: 1

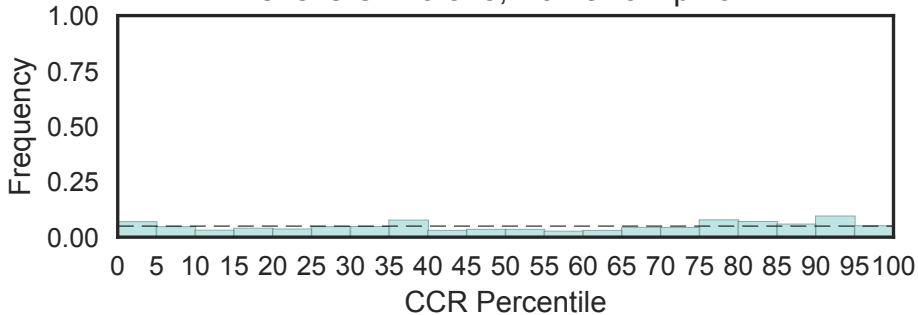

Myc target protein 1  
(Myc\_target\_1, N=1)

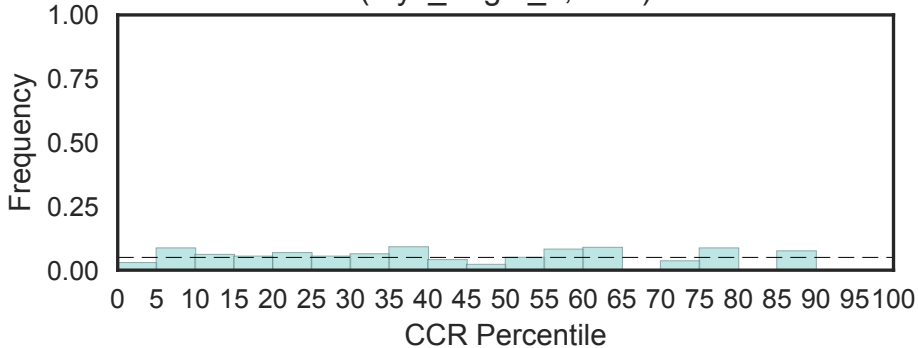

Myelin-PO cytoplasmic C-term p65 binding region  
(Myelin-PO\_C, N=1)

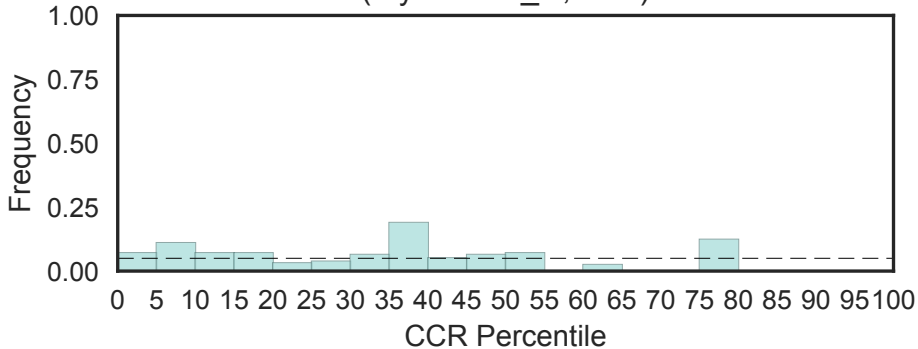

Myelin basic protein  
(Myelin\_MBP, N=2)

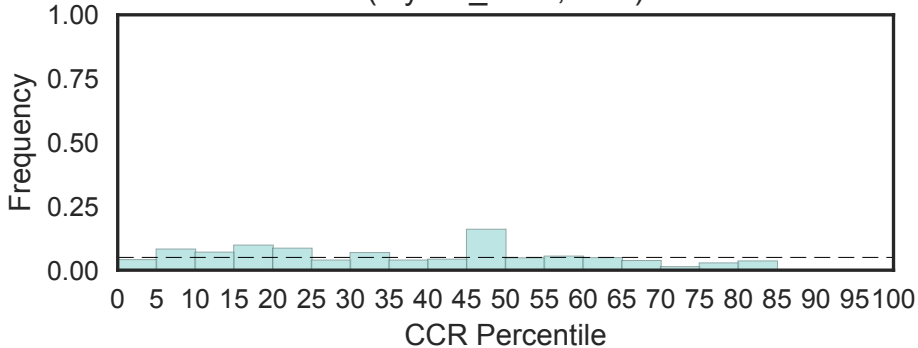

Myelin proteolipid protein (PLP or lipophilin)  
(Myelin\_PLP, N=1)

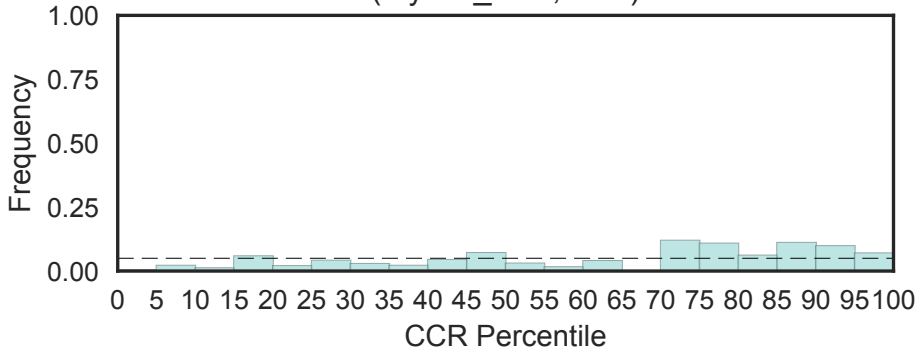

# Myogenic determination factor 5 (Myf5, N=2)

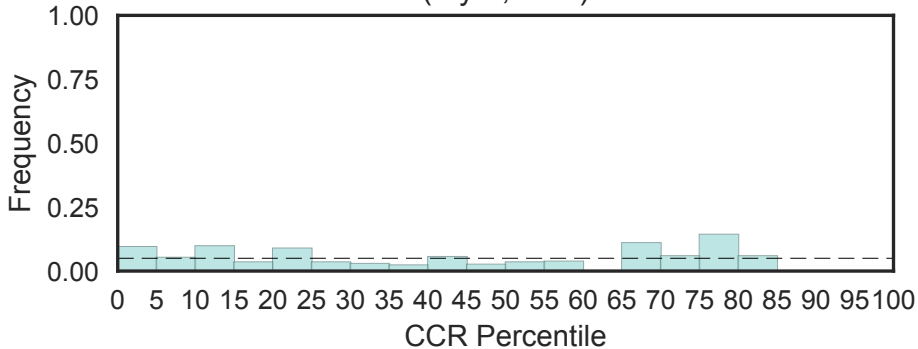

Myosin VI cargo binding domain  
(Myosin-VI\_CBD, N=1)

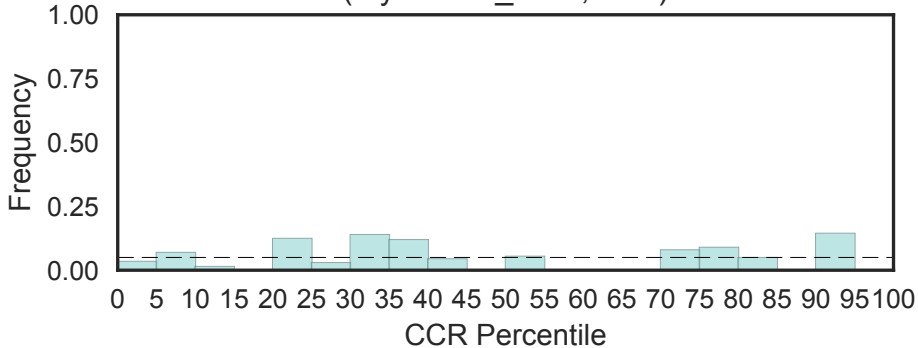

Myosin N-terminal SH3-like domain  
(Myosin\_N, N=14)

Fisher's OR: 0.498; Bonferroni p-val: 1

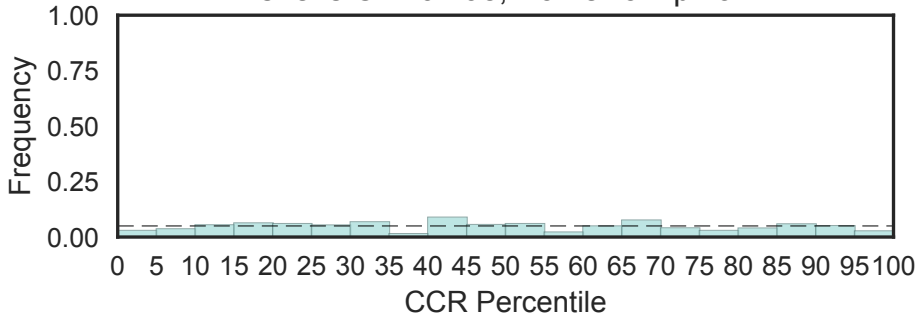



Unconventional myosin tail, actin- and lipid-binding  
(Myosin\_TH1, N=8)

Fisher's OR: 0.392; Bonferroni p-val: 1

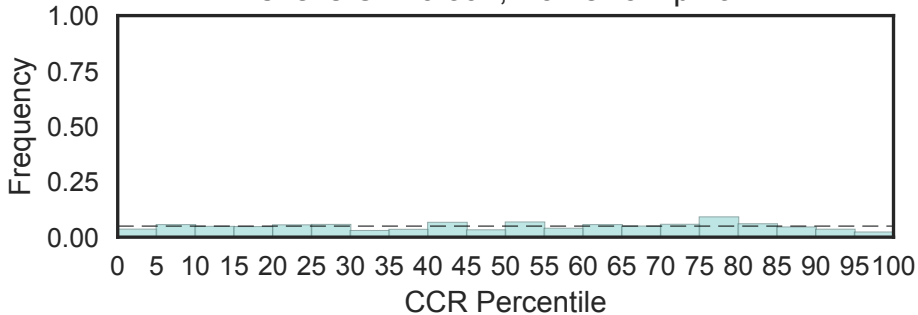

# Myosin head (motor domain)

(Myosin\_head, N=45)

Fisher's OR: 0.762; Bonferroni p-val: 1

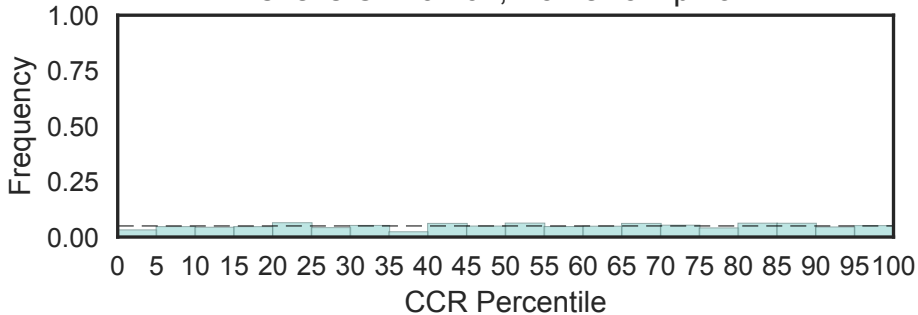

Myosin tail  
(Myosin\_tail\_1, N=20)

Fisher's OR: 0.162; Bonferroni p-val: 7.54e-12

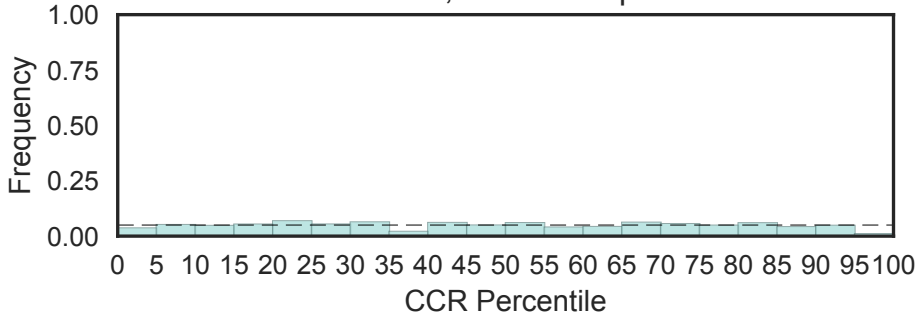

Myotubularin-like phosphatase domain  
(Myotub-related, N=14)

Fisher's OR: 1.24; Bonferroni p-val: 1

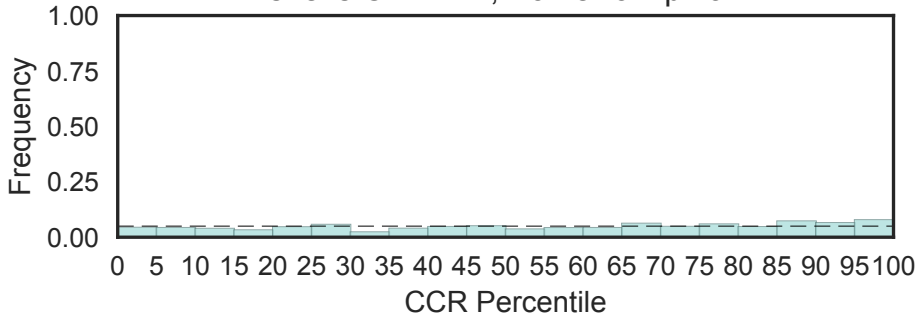

# COMPASS (Complex proteins associated with Set1p) component N (N-SET, N=2)

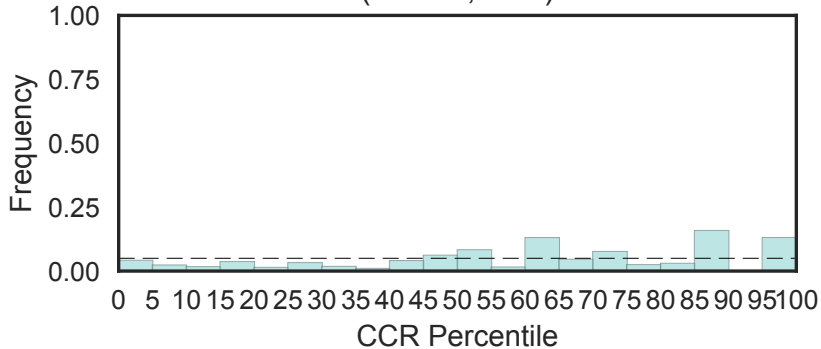

N1221-like protein  
(N1221, N=2)

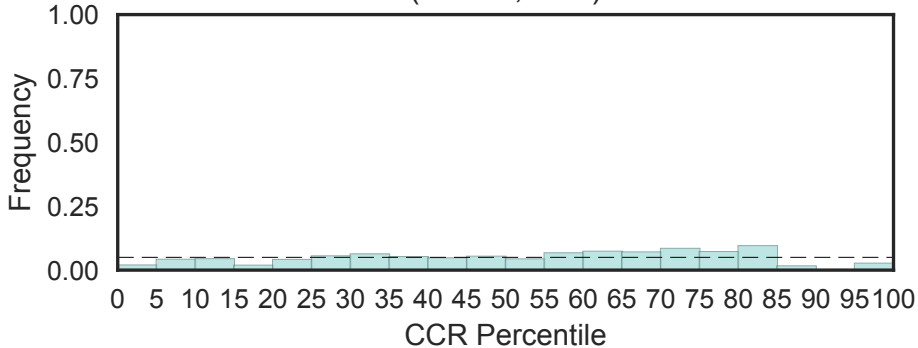

N2227-like protein  
(N2227, N=1)

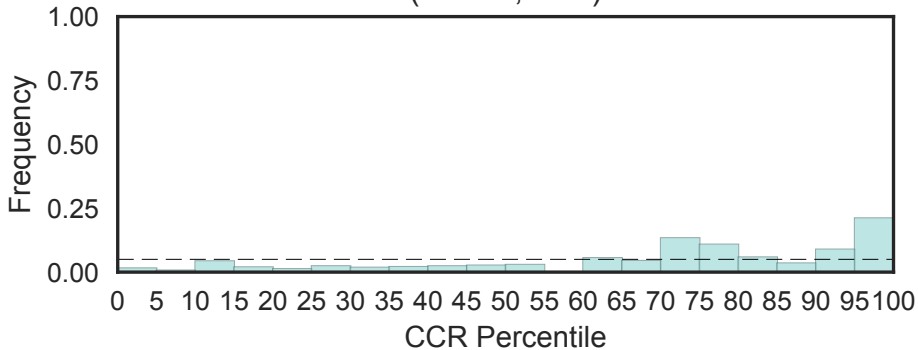

Probable N6-adenine methyltransferase  
(N6-adenineMlase, N=2)

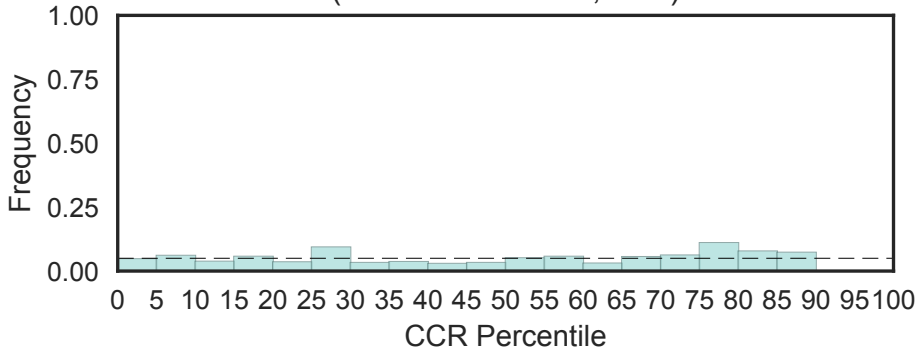



beta subunit of N-acylethanolamine-hydrolyzing acid amidase  
(NAAA-beta, N=2)

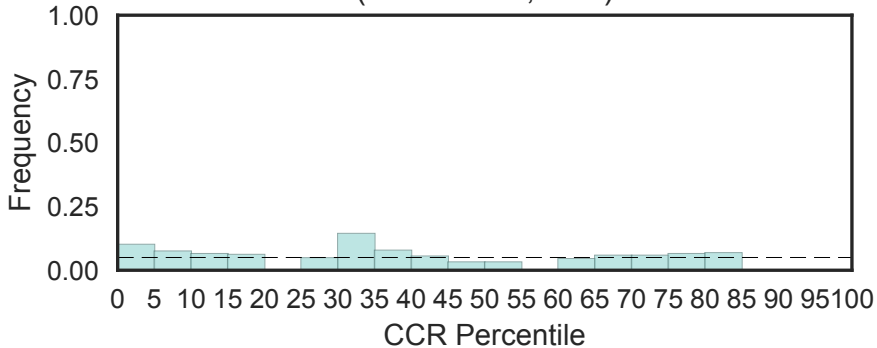

NAC domain  
(NAC, N=5)

Fisher's OR: 2.74; Bonferroni p-val: 1

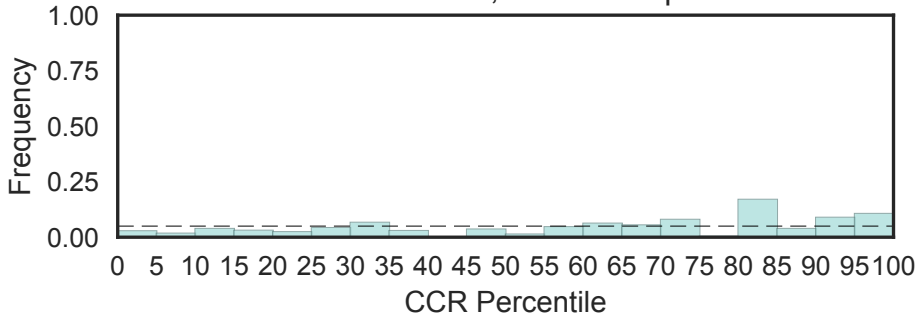

NACHT domain  
(NACHT, N=25)

Fisher's OR: 0.222; Bonferroni p-val: 1

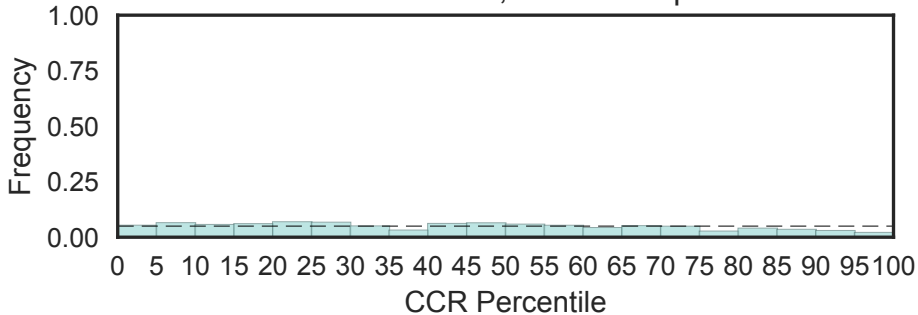

NADH-ubiquinone oxidoreductase-G iron-sulfur binding region  
(NADH-G\_4Fe-4S\_3, N=1)

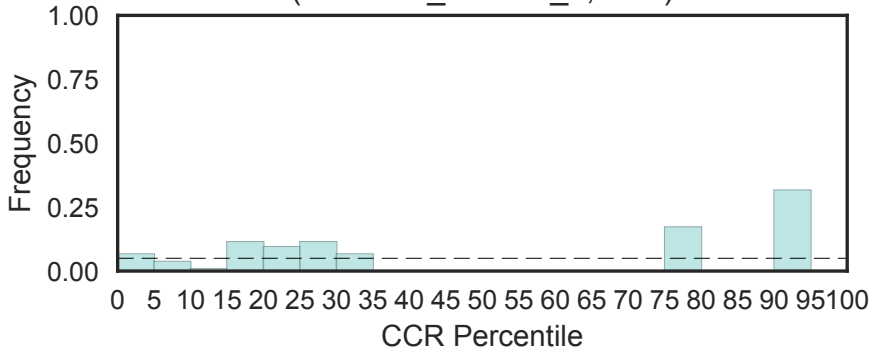

NADH-ubiquinone oxidoreductase-F iron-sulfur binding region  
(NADH\_4Fe-4S, N=1)

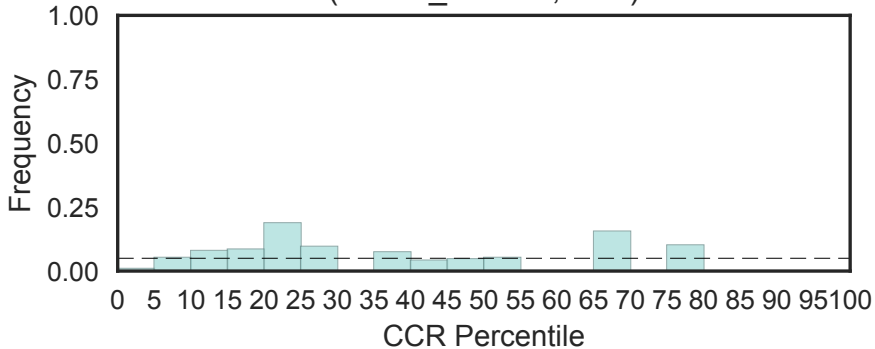

NADH dehydrogenase 1 beta subcomplex subunit 2  
(NADH\_B2, N=1)

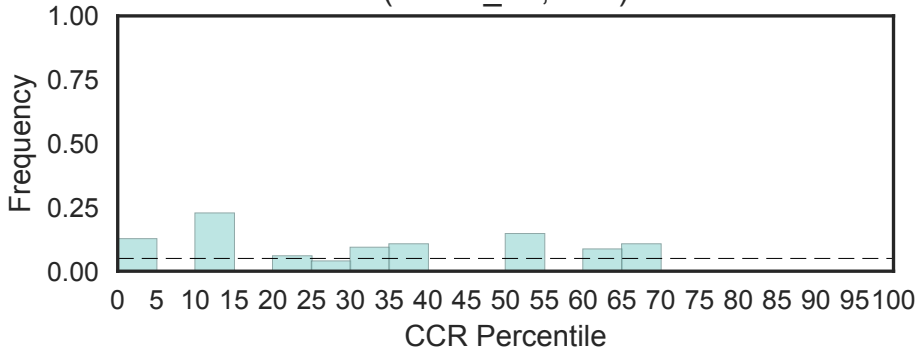

NADH dehydrogenase [ubiquinone] 1 subunit C1, mitochondrial  
(NADH\_dh\_m\_C1, N=1)

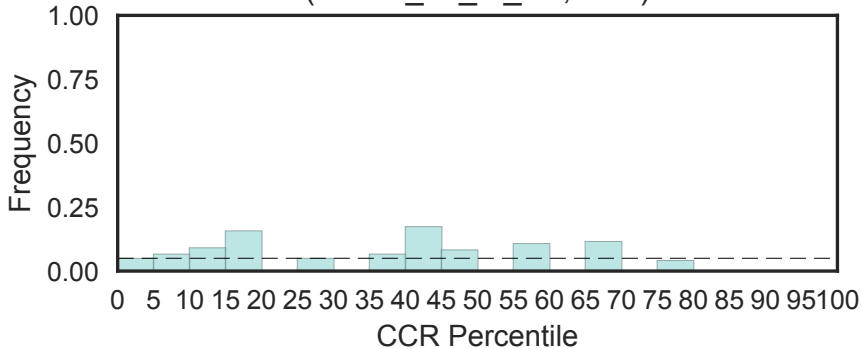

NADH-ubiquinone oxidoreductase subunit G, C-terminal  
(NADH\_dhqG\_C, N=1)

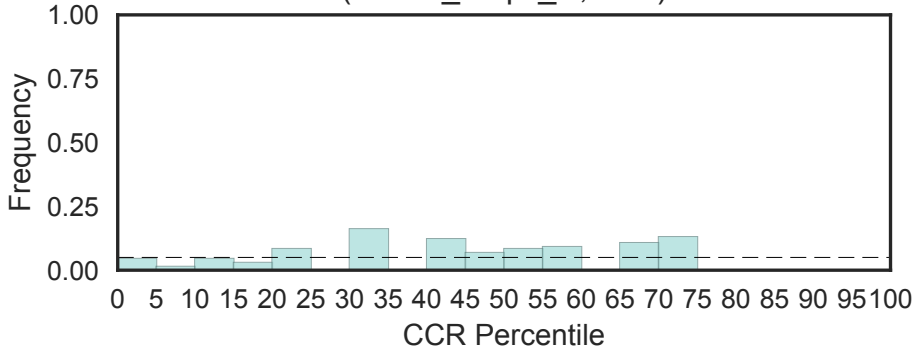



MNLL subunit  
(NADH\_oxidored, N=1)

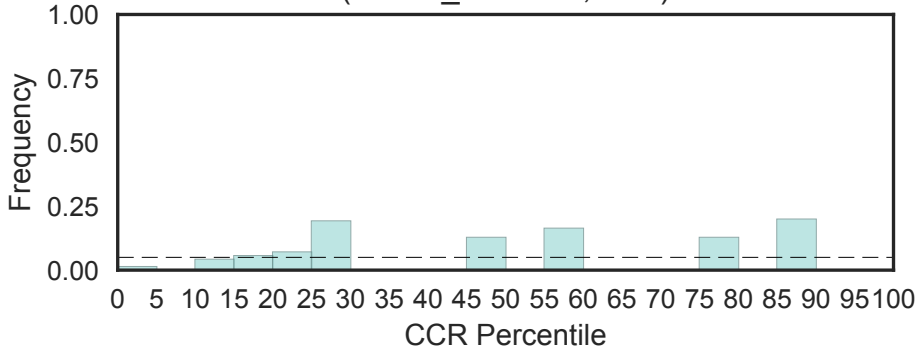

# NADH dehydrogenase 1 alpha subcomplex subunit 3 (NADHdh\_A3, N=1)

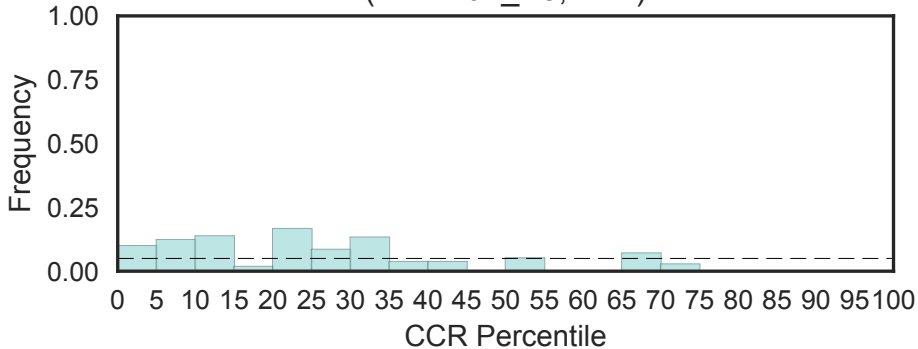

# NAD-dependent glycerol-3-phosphate dehydrogenase C-terminus (NAD\_Gly3P\_dh\_C, N=2)

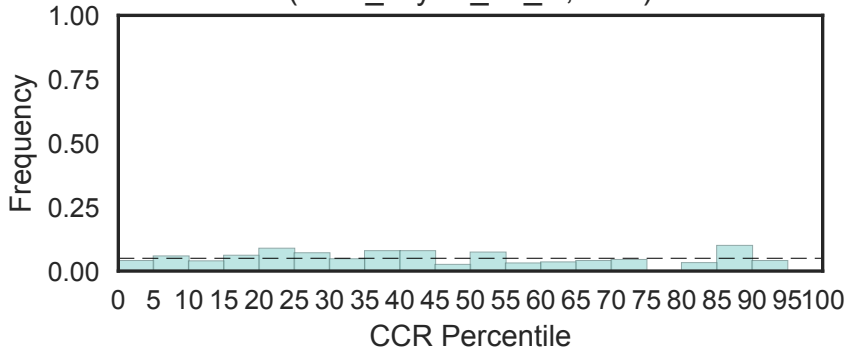

# NAD-dependent glycerol-3-phosphate dehydrogenase N-terminus (NAD\_Gly3P\_dh\_N, N=2)

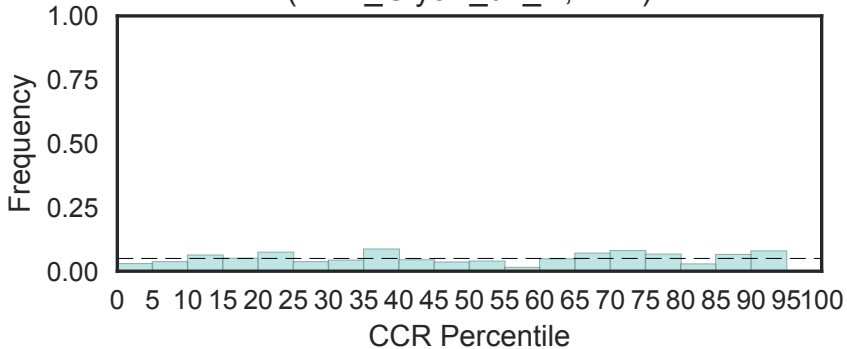

Oxidoreductase NAD-binding domain  
(NAD\_binding\_1, N=12)  
Fisher's OR: 0.395; Bonferroni p-val: 1

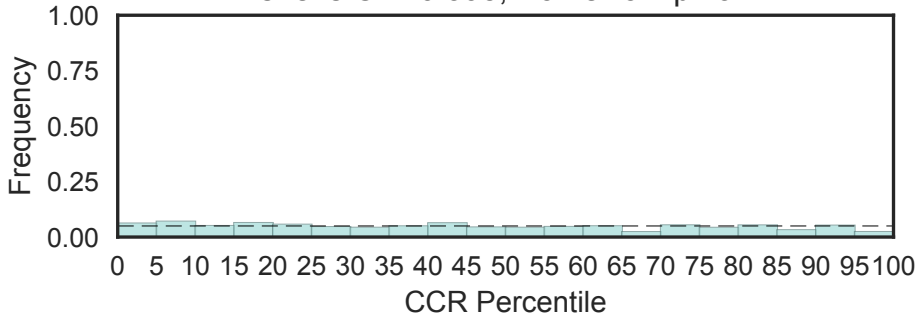

NAD(P)H-binding  
(NAD\_binding\_10, N=9)  
Fisher's OR: 0; Bonferroni p-val: 1

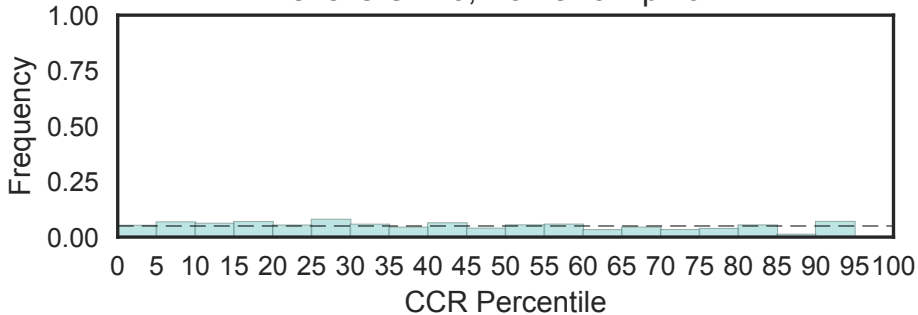

# NAD-binding of NADP-dependent 3-hydroxyisobutyrate dehydrogenase (NAD\_binding\_11, N=2)

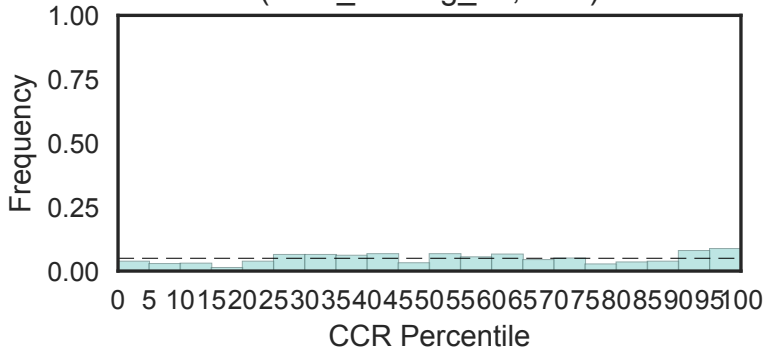

NAD binding domain of 6-phosphogluconate dehydrogenase  
(NAD\_binding\_2, N=6)

Fisher's OR: 1.23; Bonferroni p-val: 1

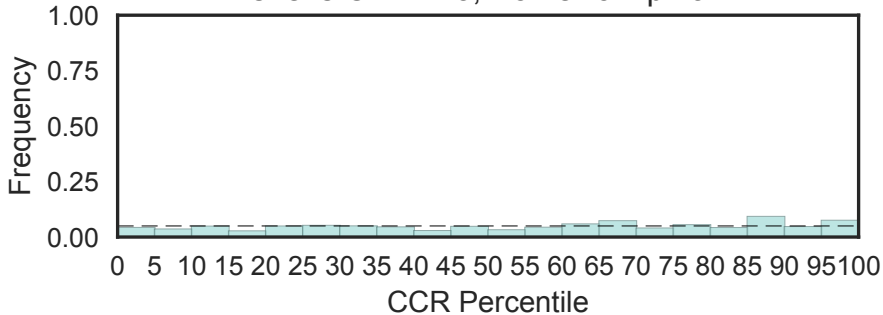



Homoserine dehydrogenase, NAD binding domain  
(NAD\_binding\_3, N=1)

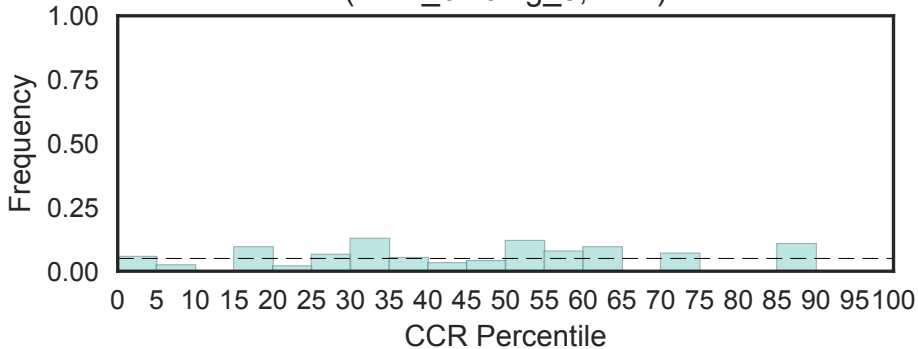

Male sterility protein  
(NAD\_binding\_4, N=10)  
Fisher's OR: 0.622; Bonferroni p-val: 1

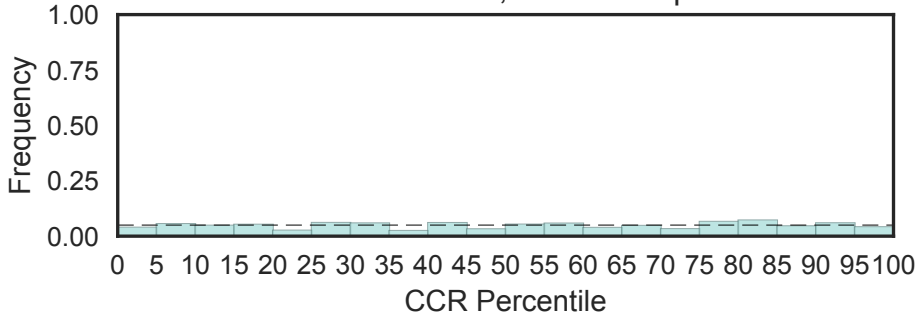

Myo-inositol-1-phosphate synthase  
(NAD\_binding\_5, N=1)

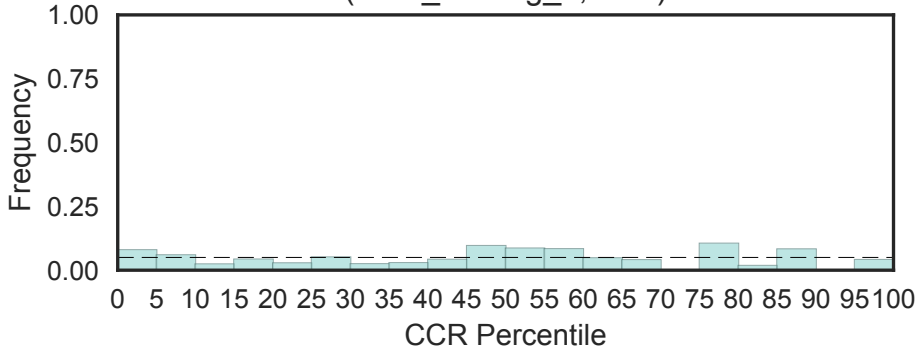

Ferric reductase NAD binding domain  
(NAD\_binding\_6, N=7)

Fisher's OR: 0; Bonferroni p-val: 1

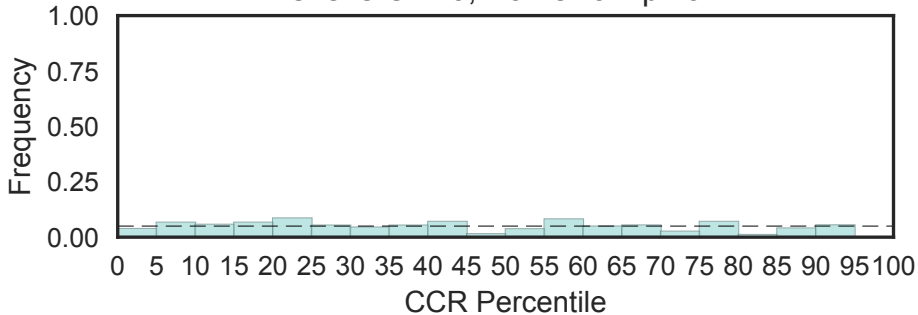

Putative NAD(P)-binding  
(NAD\_binding\_7, N=1)

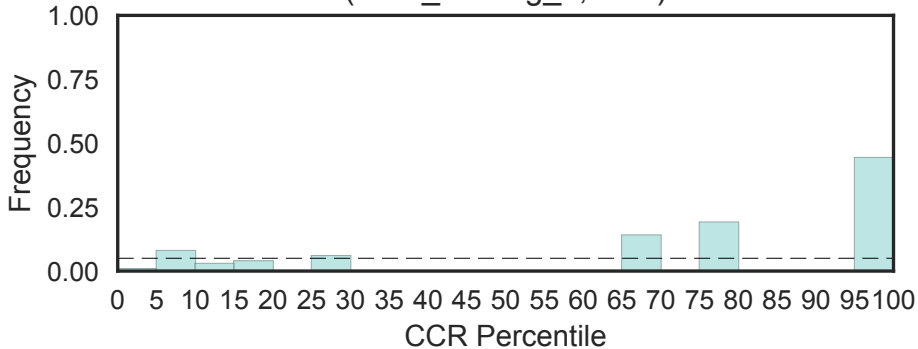

NAD(P)-binding Rossmann-like domain  
(NAD\_binding\_8, N=24)

Fisher's OR: 0.485; Bonferroni p-val: 1

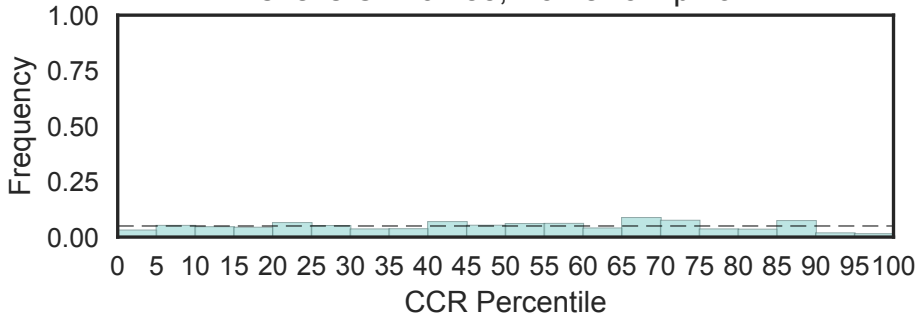

ATP-NAD kinase  
(NAD\_kinase, N=2)

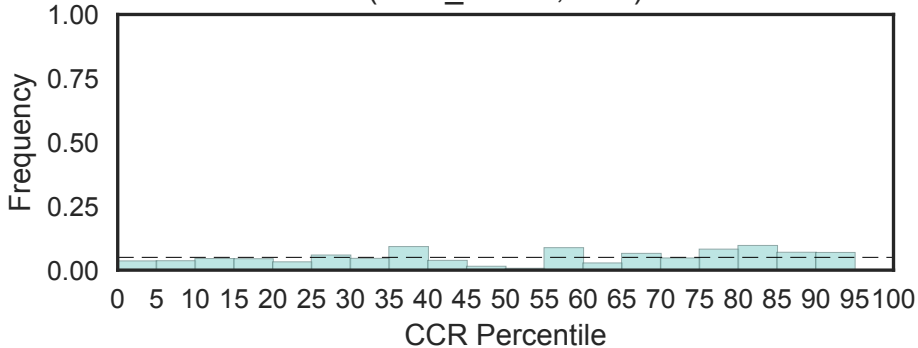

NAD synthase  
(NAD\_synthase, N=3)  
Fisher's OR: 0; Bonferroni p-val: 1

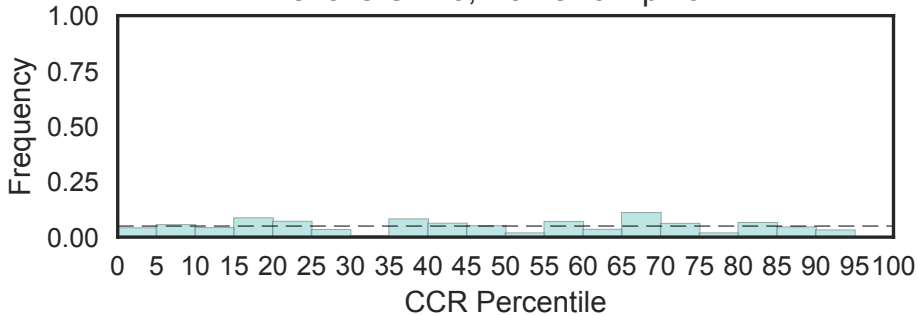



Alpha-N-acetylglucosaminidase (NAGLU) tim-barrel domain  
(NAGLU, N=1)

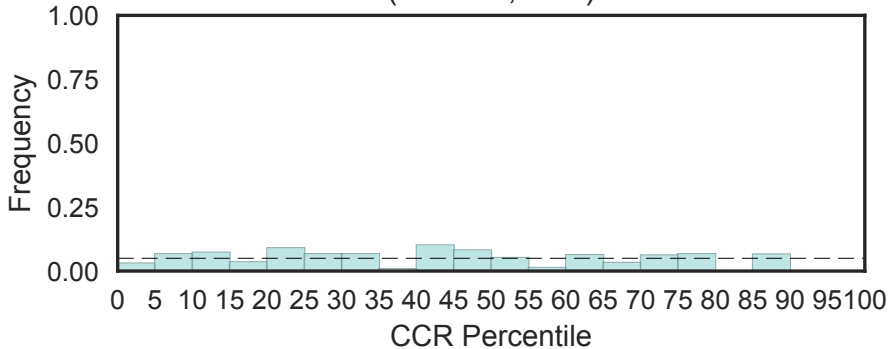

# Alpha-N-acetylglucosaminidase (NAGLU) C-terminal domain (NAGLU\_C, N=1)

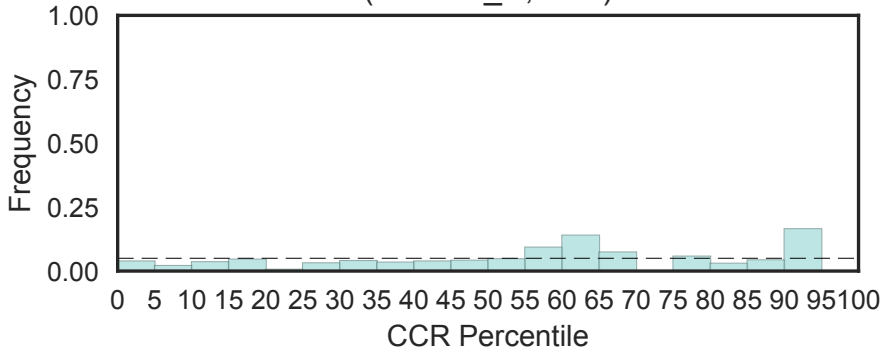

Phosphodiester glycosidase  
(NAGPA, N=1)

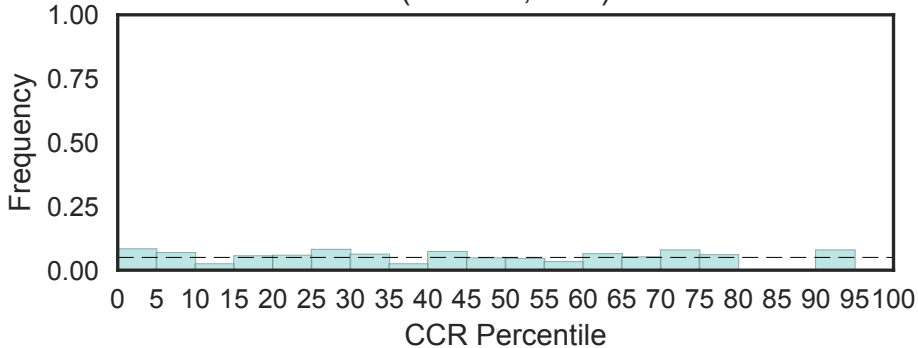

beta-N-acetylglucosaminidase  
(NAGidase, N=1)

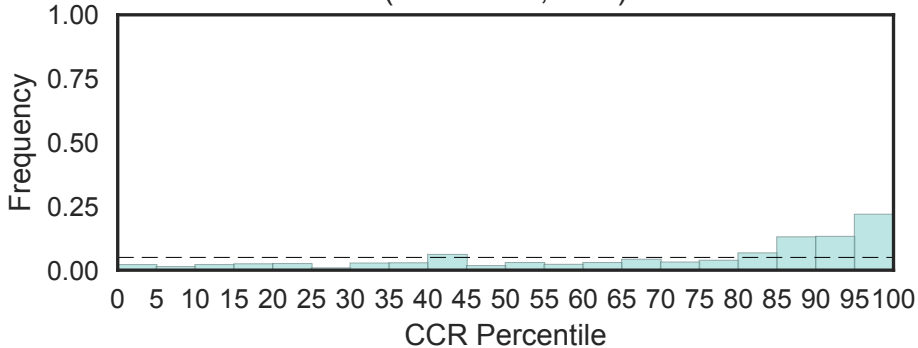

Nucleosome assembly protein (NAP)  
(NAP, N=8)

Fisher's OR: 1.69; Bonferroni p-val: 1

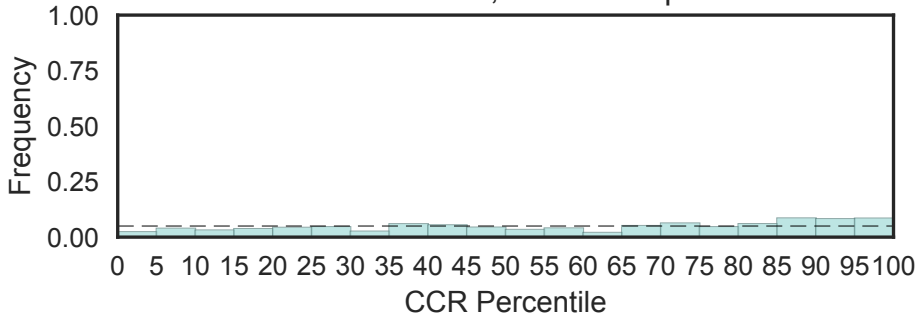

# Nicotinate phosphoribosyltransferase (NAPRTase) family (NAPRTase, N=1)

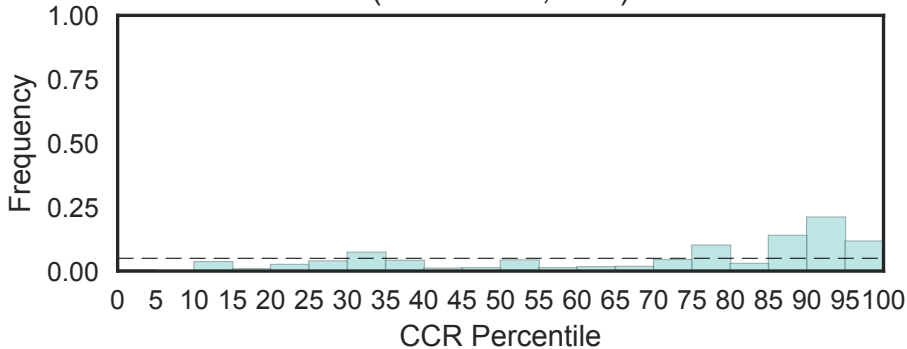

NMDA receptor-regulated gene protein 2 C-terminus  
(NARG2\_C, N=1)

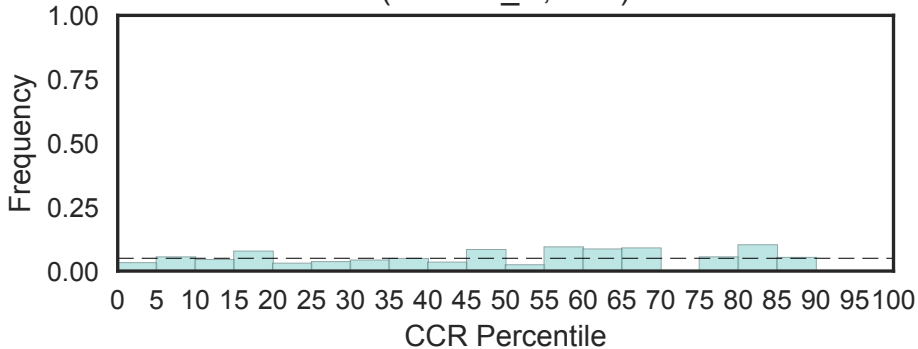

NMDA receptor-regulated protein 1  
(NARP1, N=2)

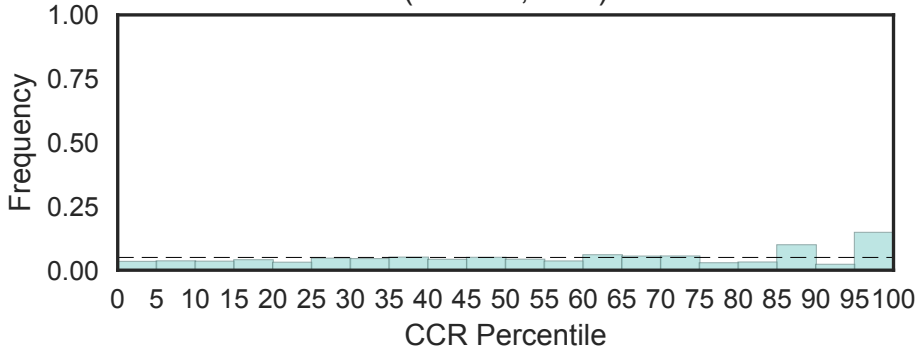



NAT, N-acetyltransferase, of N-acetylglutamate synthase  
(NAT, N=1)

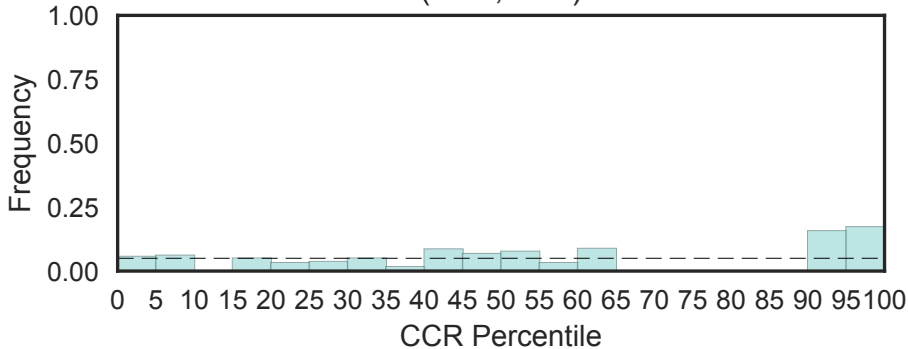

NB-ARC domain  
(NB-ARC, N=2)

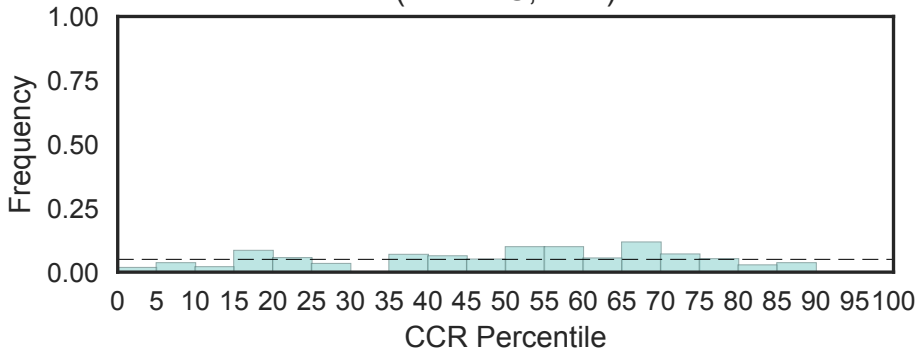

Nuclear cap-binding protein subunit 3  
(NCBP3, N=1)

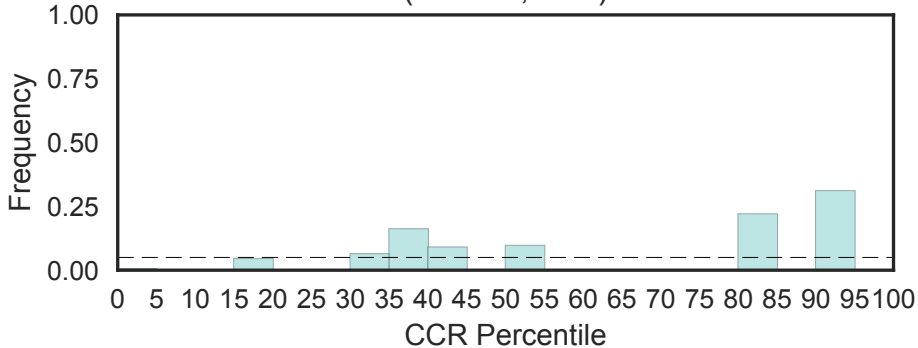

NAB conserved region 1 (NCD1)  
(NCD1, N=2)

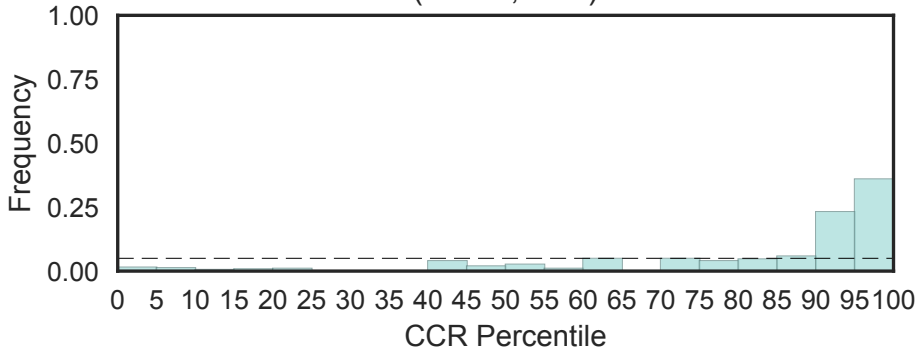

NAB conserved region 2 (NCD2)  
(NCD2, N=2)

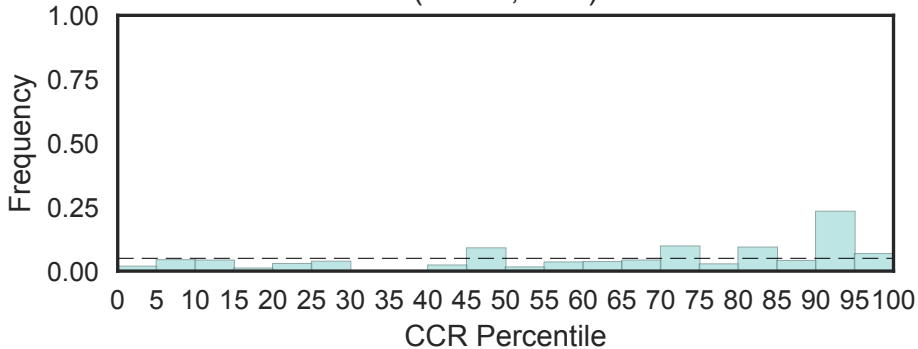

Nine Cysteines Domain of family 3 GPCR  
(NCD3G, N=13)

Fisher's OR: 0.953; Bonferroni p-val: 1

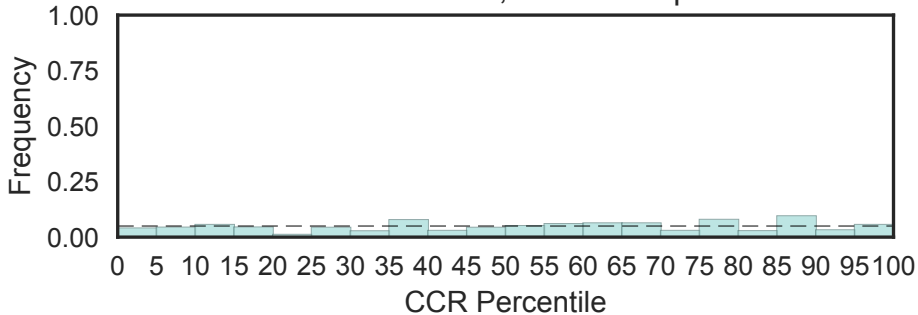

Nck-associated protein 5, Peripheral clock protein  
(NCKAP5, N=2)

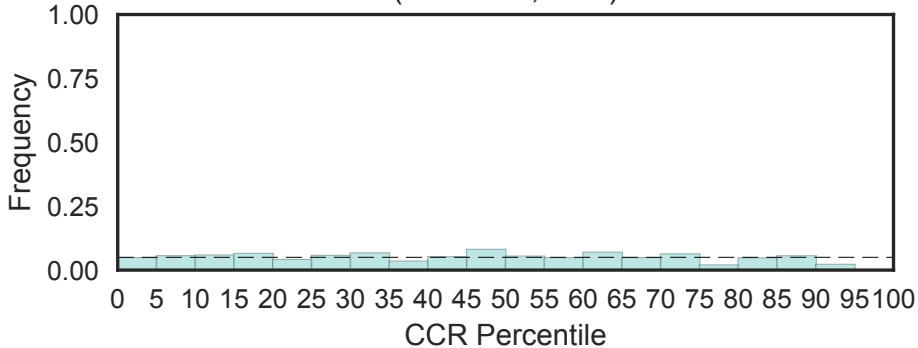

# Unstructured region on nuclear receptor coactivator protein (NCOA\_u2, N=3)

Fisher's OR: 0; Bonferroni p-val: 1

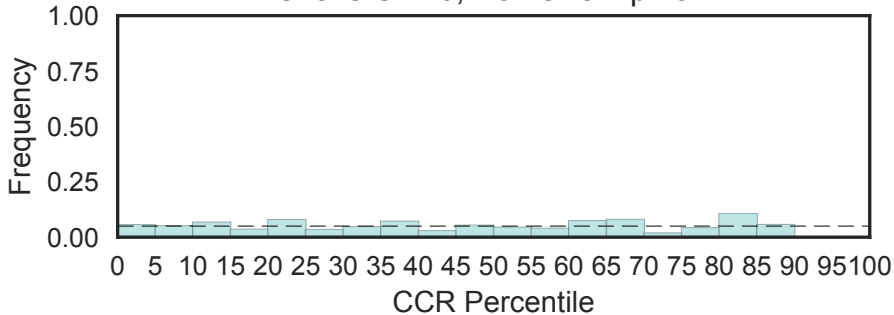



Lysosomal transcription factor, NCU-G1  
(NCU-G1, N=1)

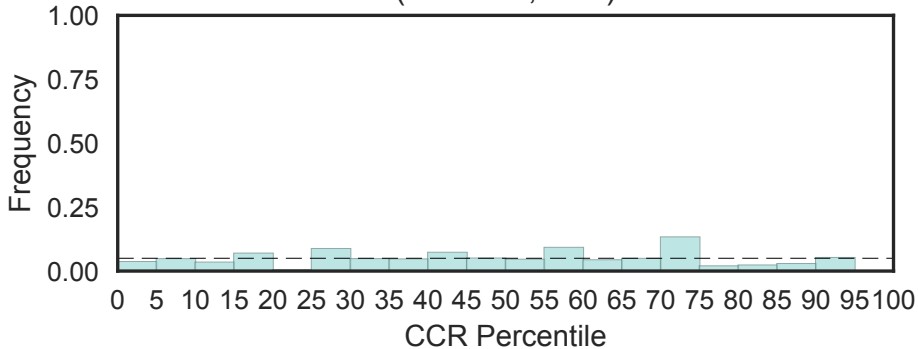

Nucleoside diphosphate kinase  
(NDK, N=15)

Fisher's OR: 0.133; Bonferroni p-val: 1

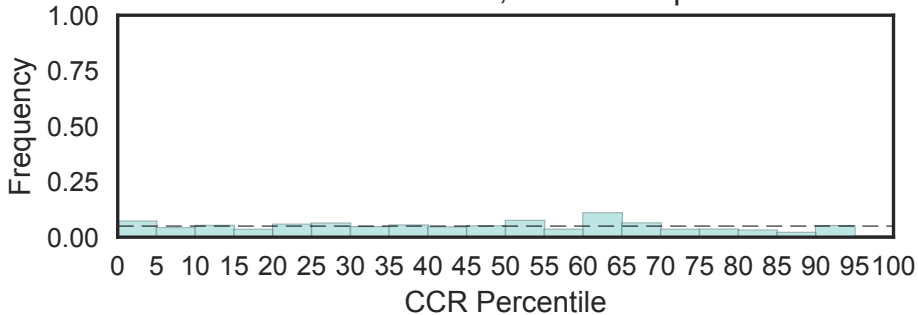

NDT80 / PhoG like DNA-binding family  
(NDT80\_PhoG, N=1)

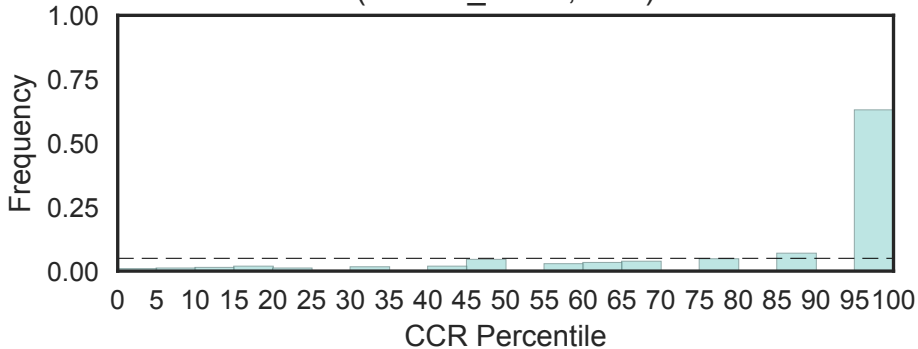

NADH ubiquinone oxidoreductase subunit NDUFA12  
(NDUFA12, N=3)

Fisher's OR: 0; Bonferroni p-val: 1

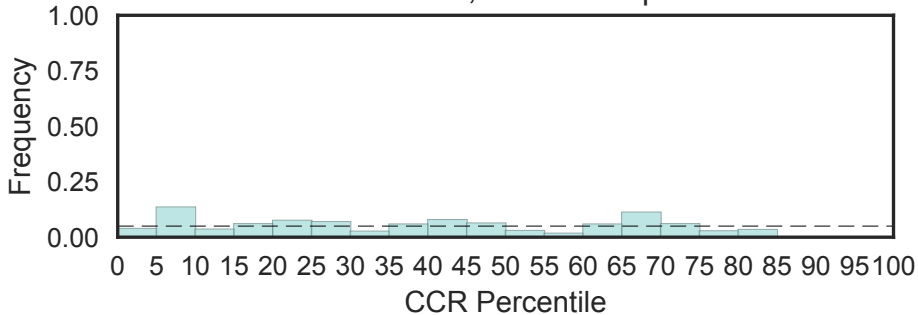

NADH-ubiquinone oxidoreductase subunit 10  
(NDUFB10, N=1)

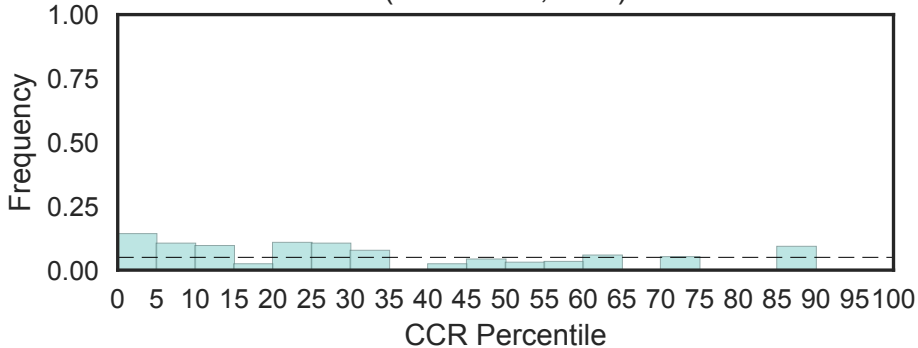

# NADH dehydrogenase [ubiquinone] flavoprotein 3, mitochondrial (NDUFV3, N=1)

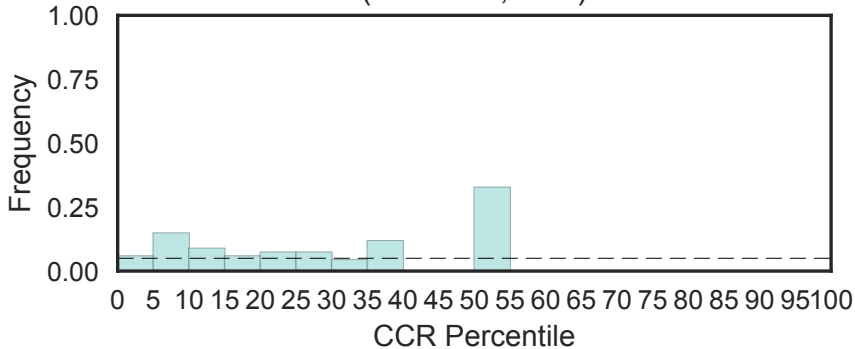

NADH-ubiquinone oxidoreductase B12 subunit family  
(NDUF\_B12, N=1)

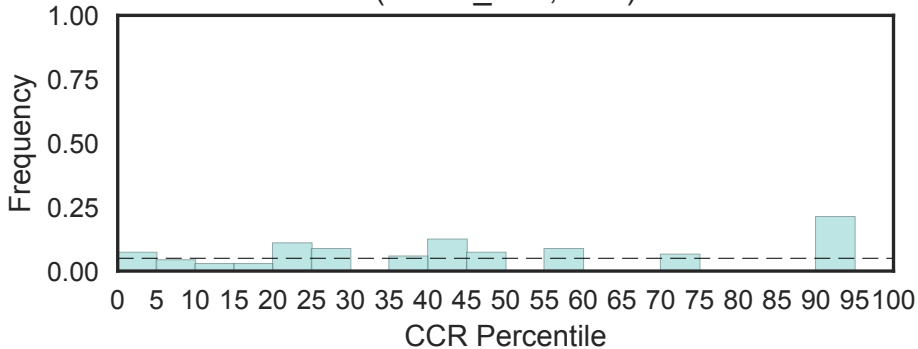

# NADH-ubiquinone oxidoreductase B15 subunit (NDUFB4) (NDUF\_B4, N=1)

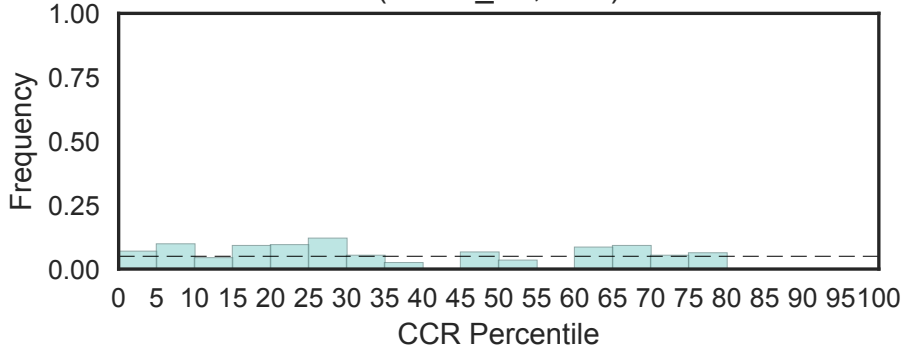



NADH:ubiquinone oxidoreductase, NDUFB5/SGDH subunit  
(NDUF\_B5, N=1)

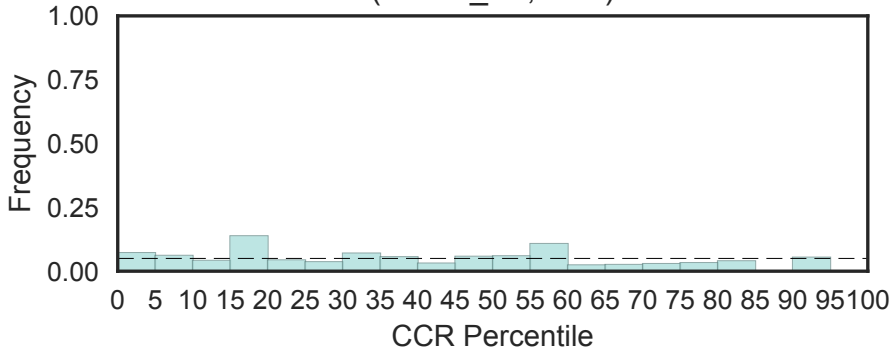

NADH:ubiquinone oxidoreductase, NDUF6/B17 subunit  
(NDUF\_B6, N=2)

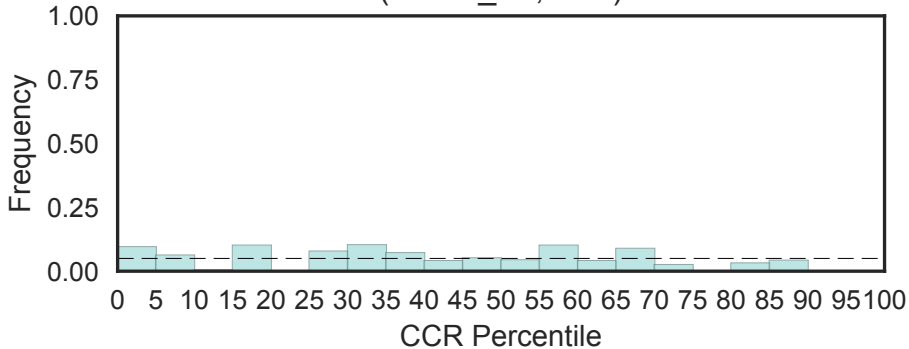

NADH-ubiquinone oxidoreductase B18 subunit (NDUFB7)  
(NDUF\_B7, N=1)

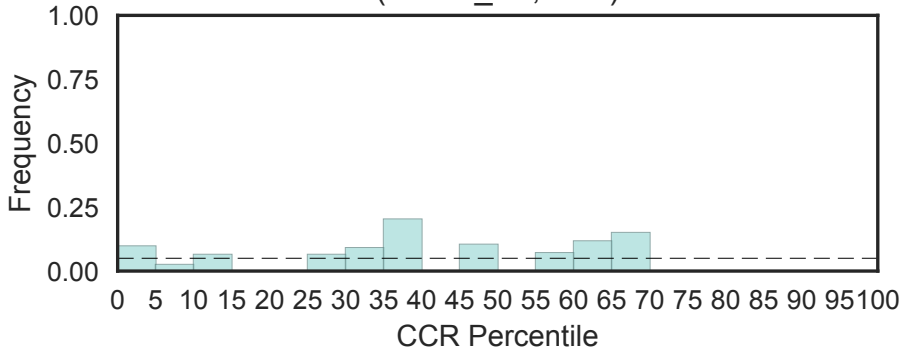

NADH-ubiquinone oxidoreductase ASH1 subunit (CI-ASH1 or NDUFB8)  
(NDUF\_B8, N=1)

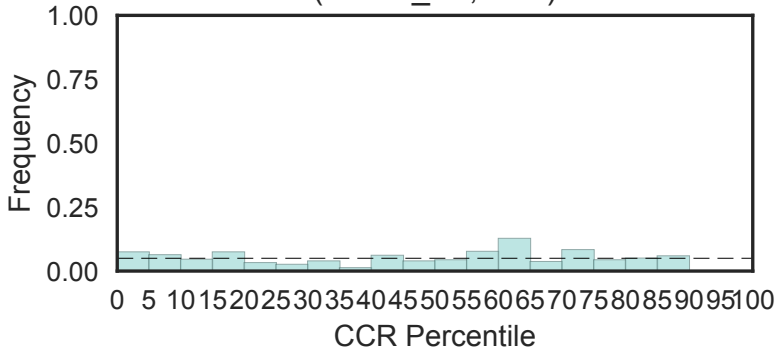

NADH-ubiquinone oxidoreductase subunit b14.5b (NDUFC2)  
(NDUF\_C2, N=4)

Fisher's OR: 0; Bonferroni p-val: 1

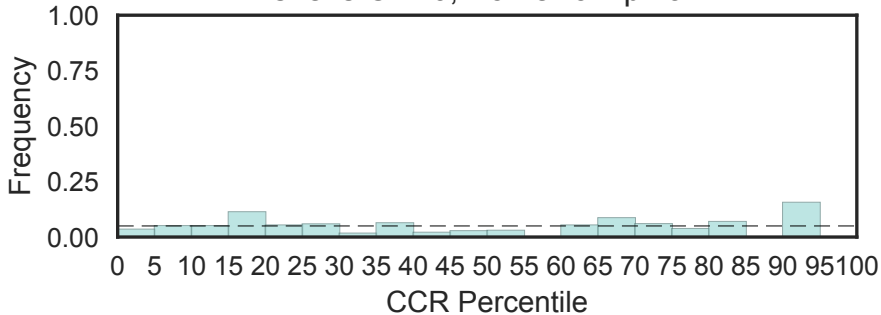

# NF-kappa-B essential modulator NEMO (NEMO, N=1)

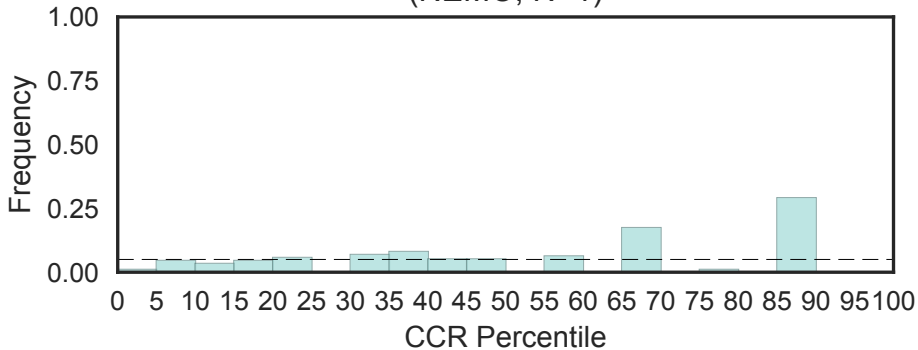

NEMP family  
(NEMP, N=2)

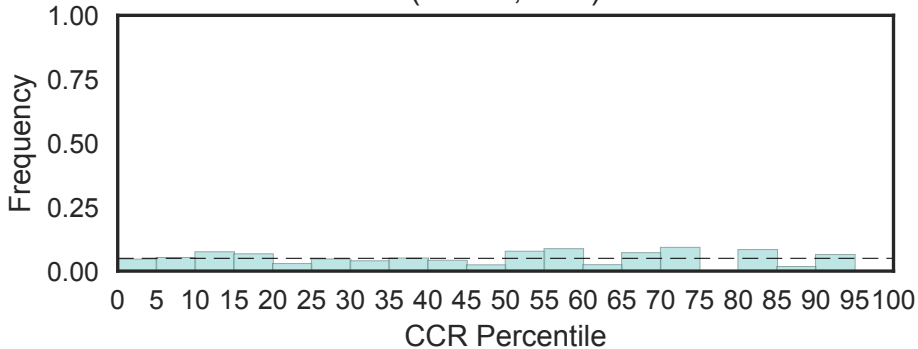

# Neuroendocrine-specific golgi protein P55 (NESP55) (NESP55, N=2)

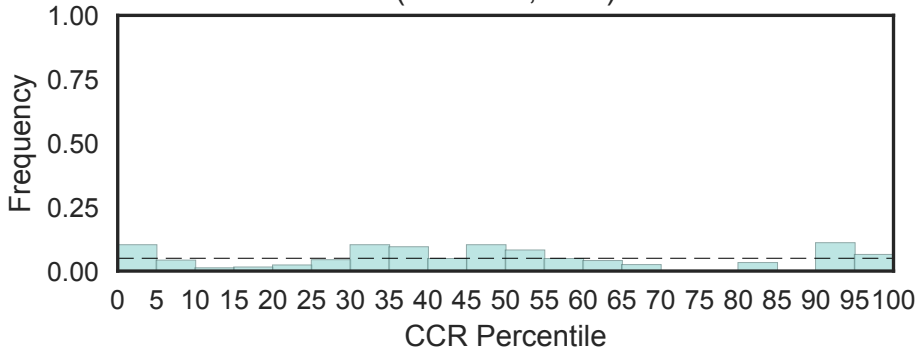



Regulatory region of Na<sup>+</sup>/H<sup>+</sup> exchanger NHE binds to calmodulin  
(NEXCaM\_BD, N=3)

Fisher's OR: 0; Bonferroni p-val: 1

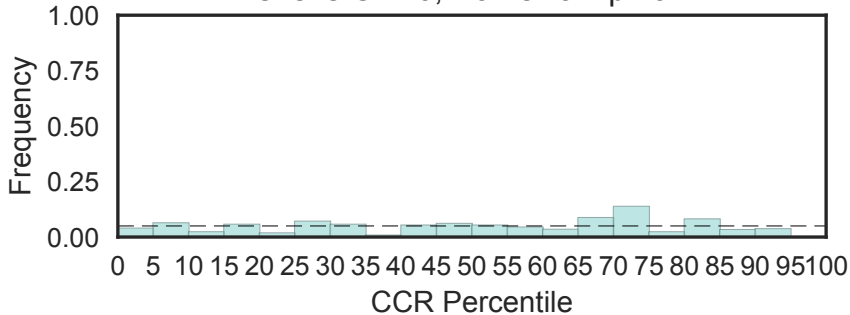

NFRKB Winged Helix-like  
(NFRKB\_winged, N=1)

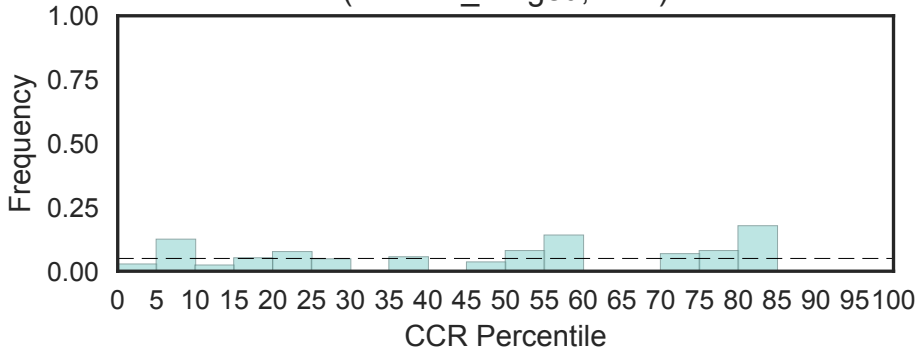

Nerve growth factor family  
(NGF, N=4)

Fisher's OR: 0.721; Bonferroni p-val: 1

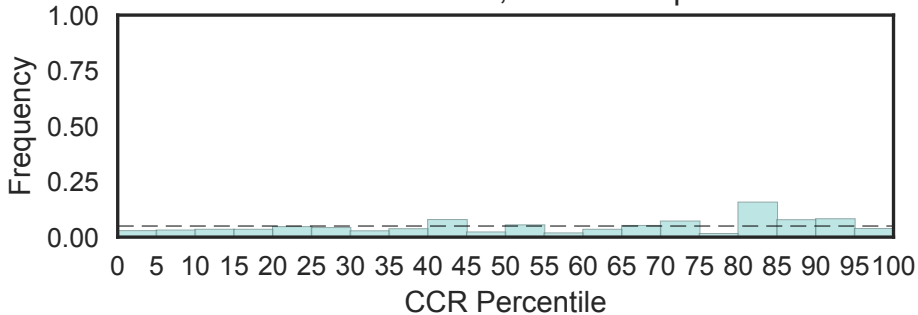

NGP1NT (NUC091) domain  
(NGP1NT, N=1)

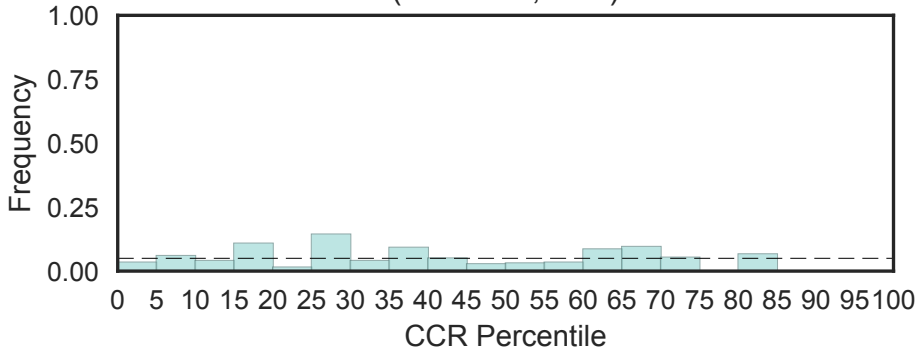

NHL repeat  
(NHL, N=29)

Fisher's OR: 4.29; Bonferroni p-val: 1

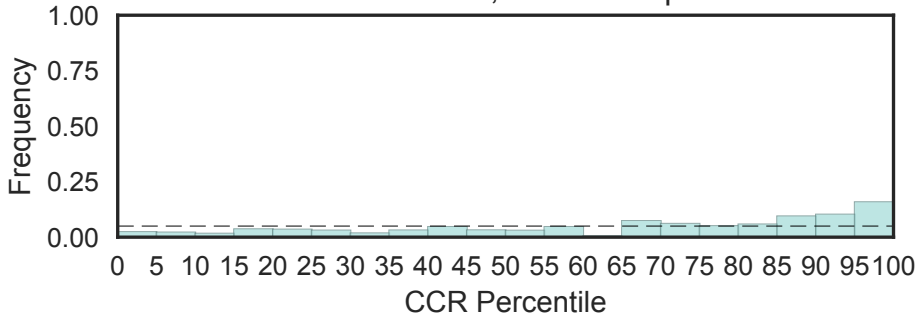

NHR2 domain like  
(NHR2, N=3)

Fisher's OR: 0; Bonferroni p-val: 1

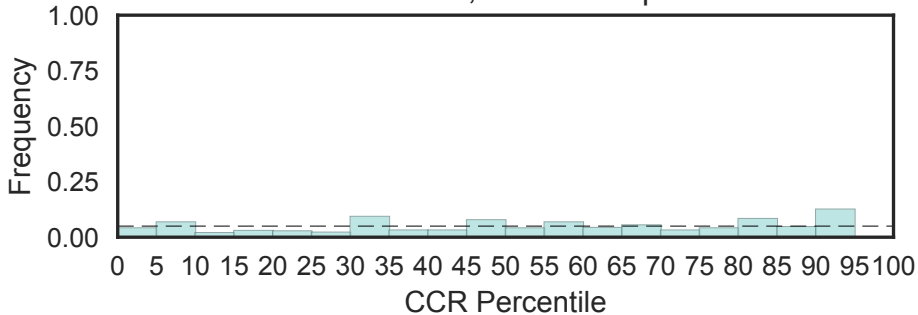

# NHS-like (NHS, N=1)

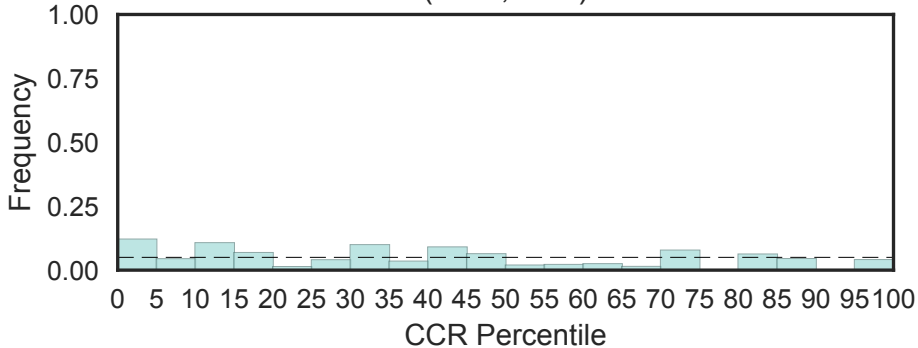

# Second BRCT domain on Nijmegen syndrome breakage protein (NIBRIN\_BRCT\_II, N=1)

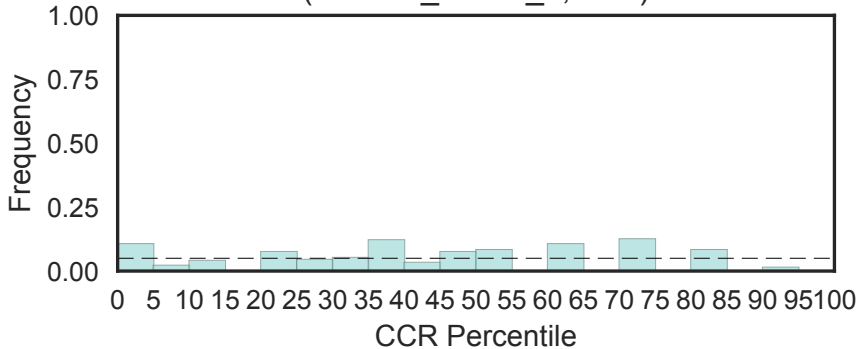



Cysteine-rich C-terminal 1 family  
(NICE-1, N=1)

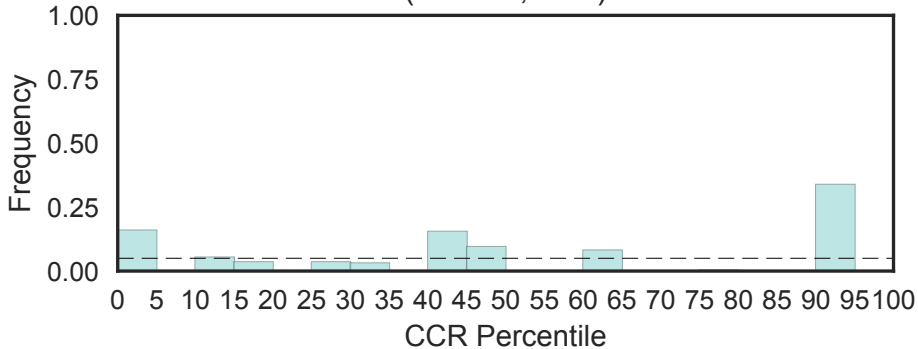

NICE-3 protein  
(NICE-3, N=1)

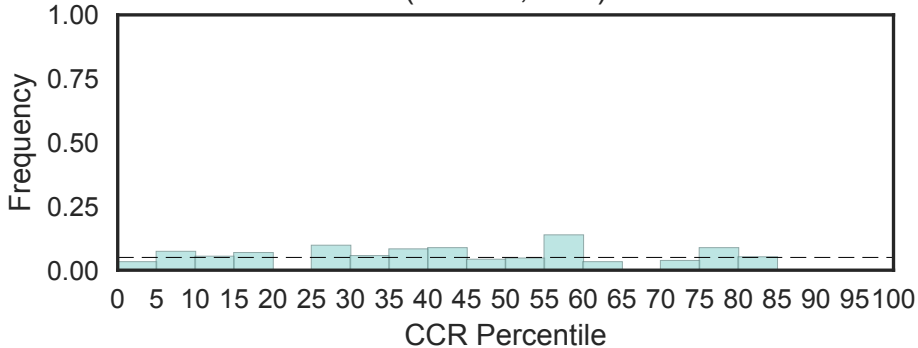

Nmi/IFP 35 domain (NID)  
(NID, N=4)

Fisher's OR: 0; Bonferroni p-val: 1

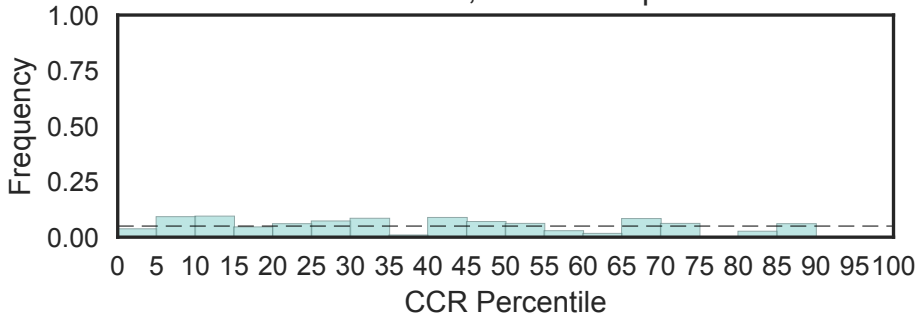

Nidogen-like  
(NIDO, N=5)

Fisher's OR: 0; Bonferroni p-val: 1

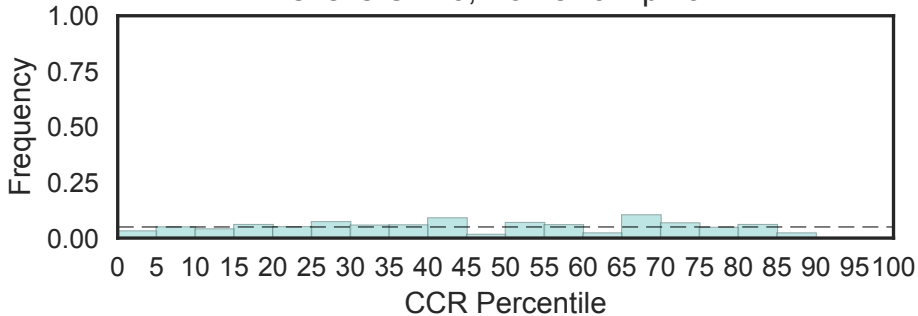

NLI interacting factor-like phosphatase  
(NIF, N=8)

Fisher's OR: 4.1; Bonferroni p-val: 0.202

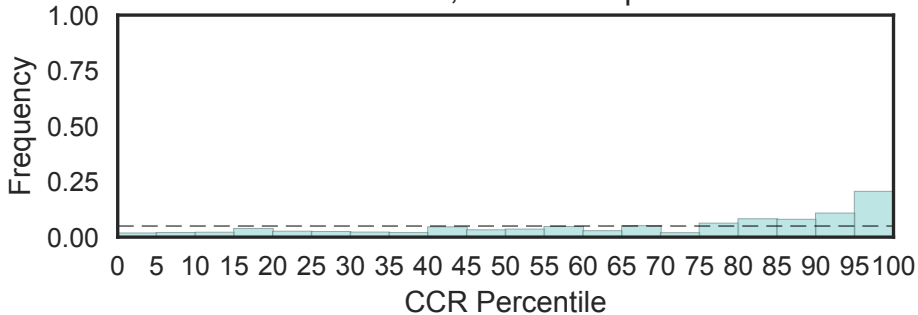

NIF3 (NGG1p interacting factor 3)  
(NIF3, N=1)

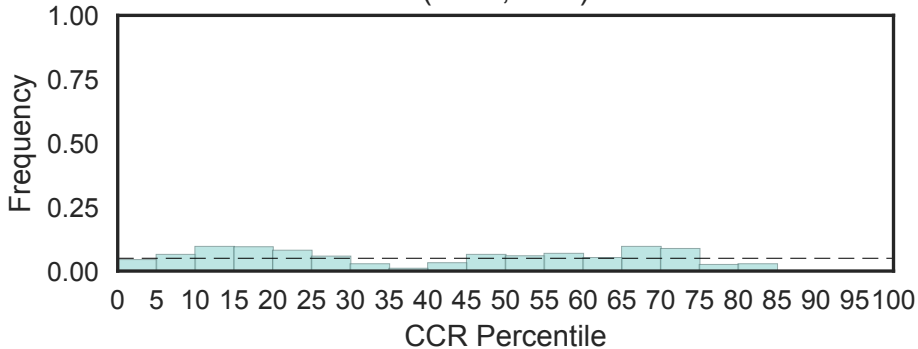

NIPSNAP  
(NIPSNAP, N=7)

Fisher's OR: 0; Bonferroni p-val: 1

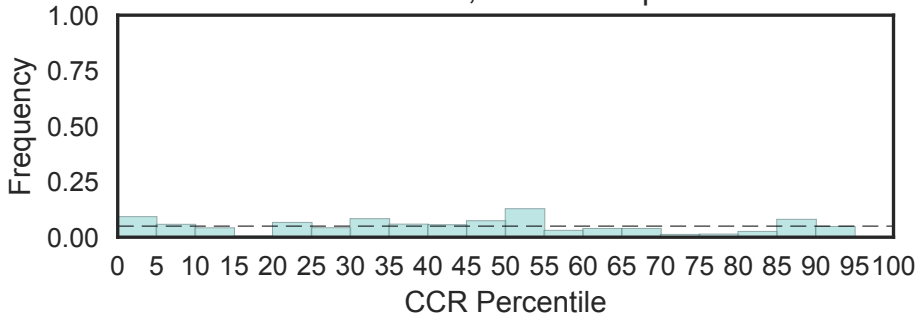

Na,K-Atpase Interacting protein  
(NKAIN, N=5)

Fisher's OR: 1.26; Bonferroni p-val: 1

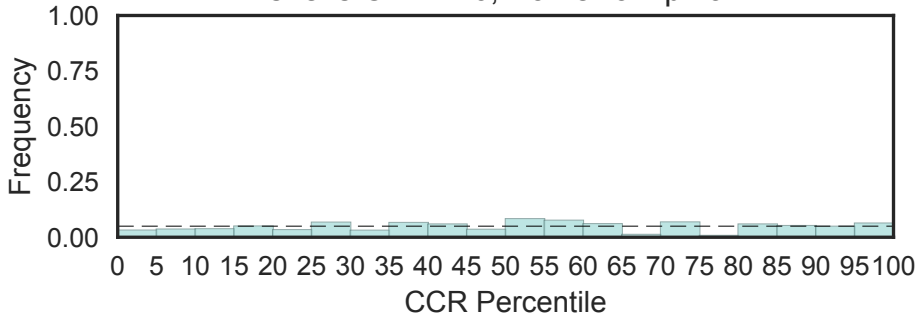



# NF-kappa-B-activating protein (NKAP, N=2)

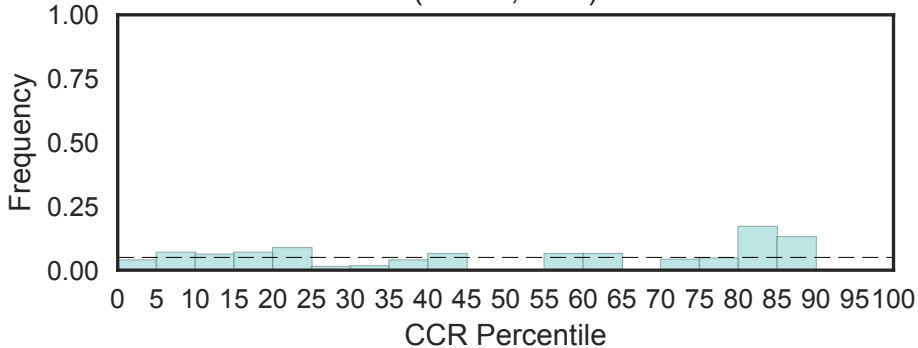

NLE (NUC135) domain  
(NLE, N=2)

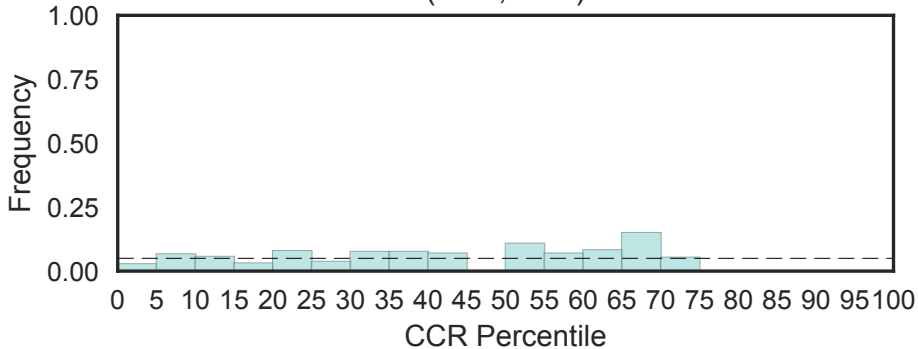

NMD3 family  
(NMD3, N=1)

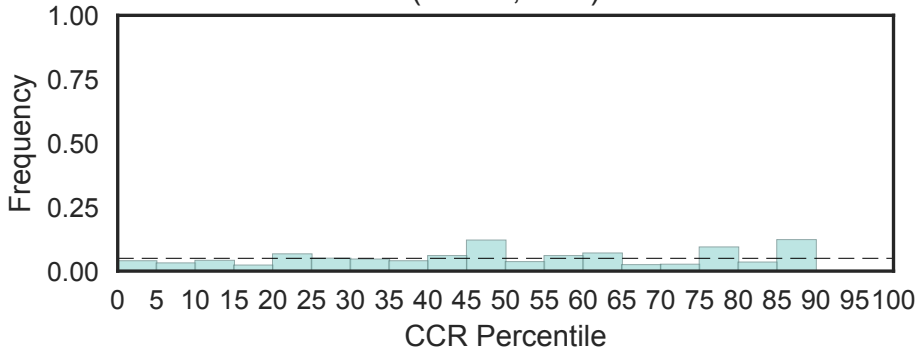

N-methyl D-aspartate receptor 2B3 C-terminus  
(NMDAR2\_C, N=3)

Fisher's OR: 0.446; Bonferroni p-val: 1

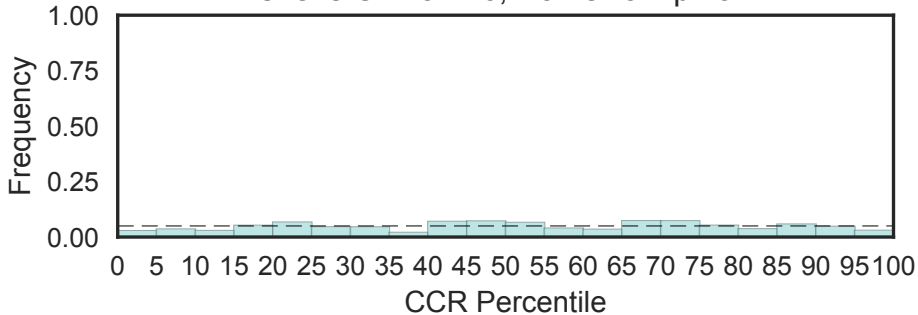

# Nitronate monooxygenase (NMO, N=1)

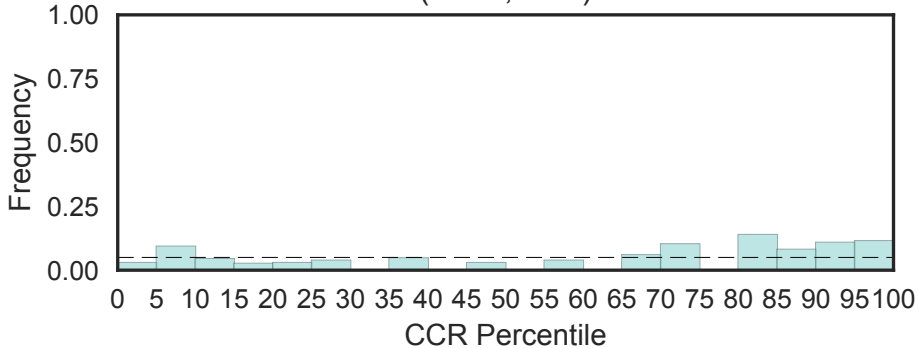

# Myristoyl-CoA:protein N-myristoyltransferase, N-terminal domain (NMT, N=2)

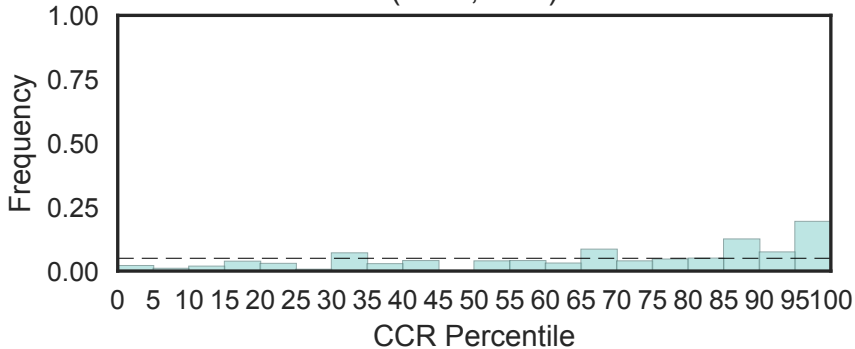

Myristoyl-CoA:protein N-myristoyltransferase, C-terminal domain  
(NMT\_C, N=2)

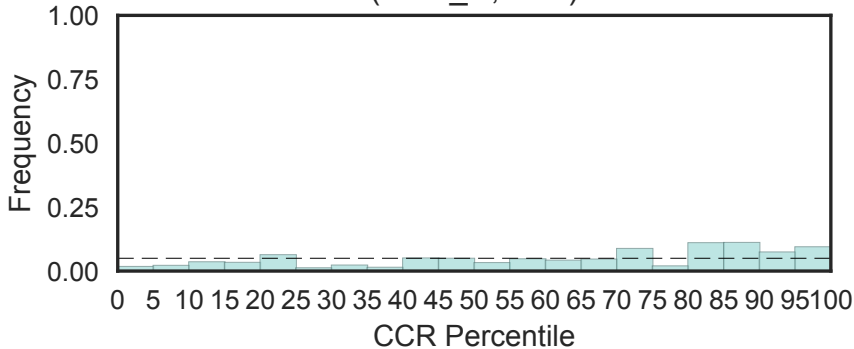

# Neuromedin U (NMU, N=1)

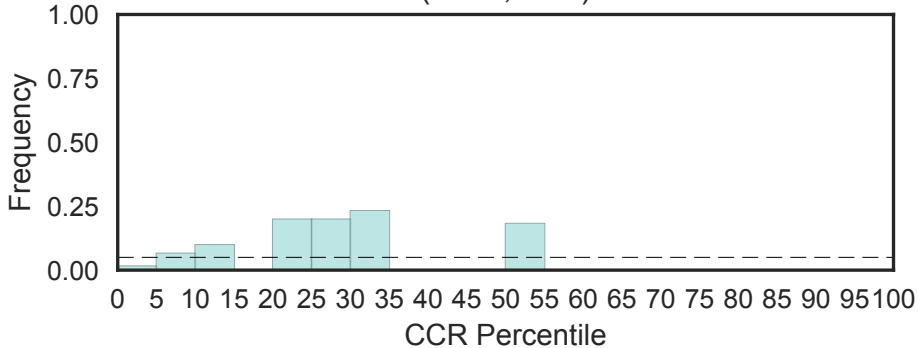



NNMT/PNMT/TEMT family  
(NNMT\_PNMT\_TEMT, N=3)  
Fisher's OR: 0; Bonferroni p-val: 1

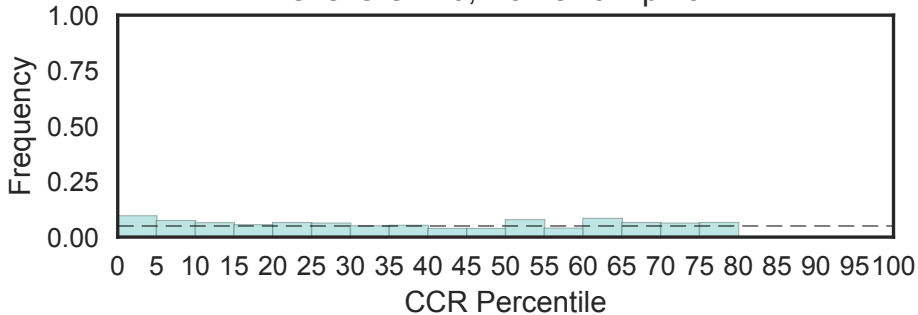

NOA36 protein  
(NOA36, N=1)

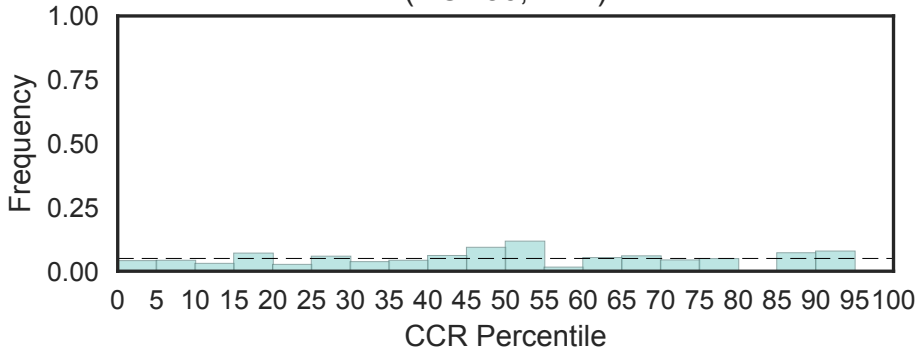

Nin one binding (NOB1) Zn-ribbon like  
(NOB1\_Zn\_bind, N=1)

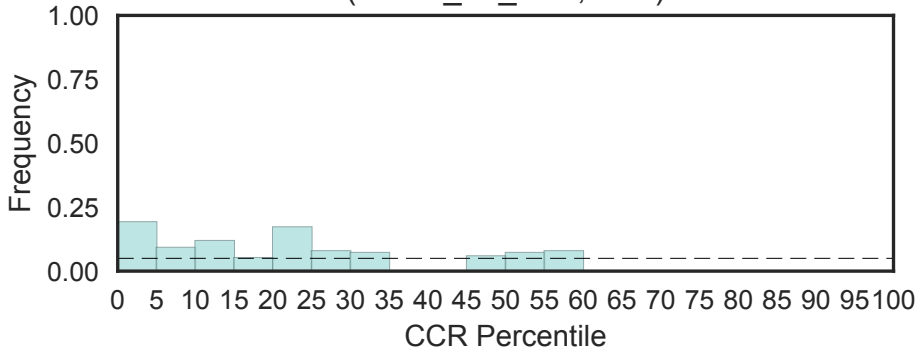

Nucleolar complex-associated protein  
(NOC3p, N=1)

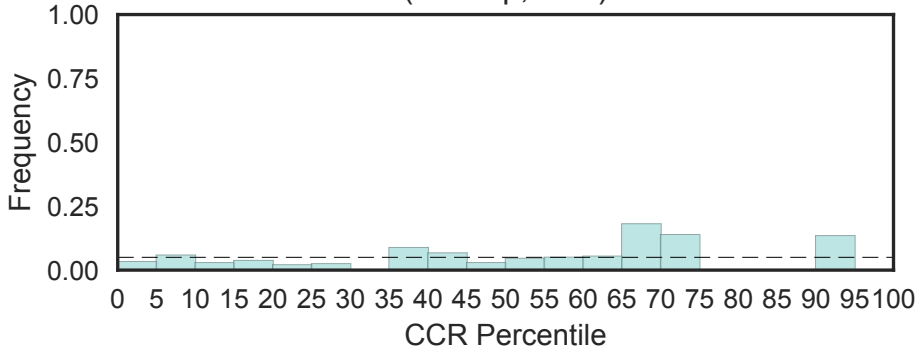

NOTCH protein  
(NOD, N=4)

Fisher's OR: 0; Bonferroni p-val: 1

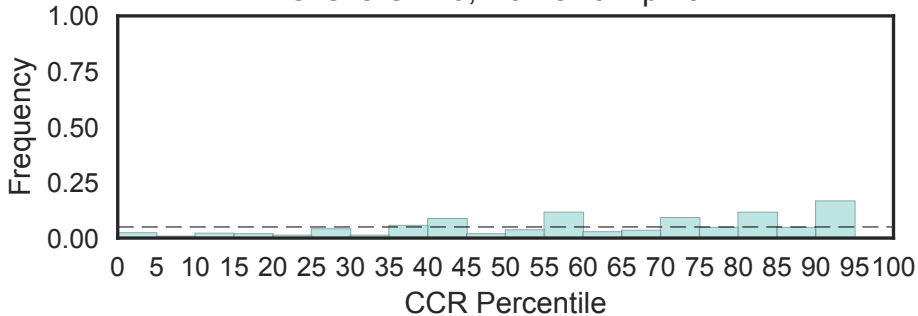

NOTCH protein  
(NODP, N=4)

Fisher's OR: 0; Bonferroni p-val: 1

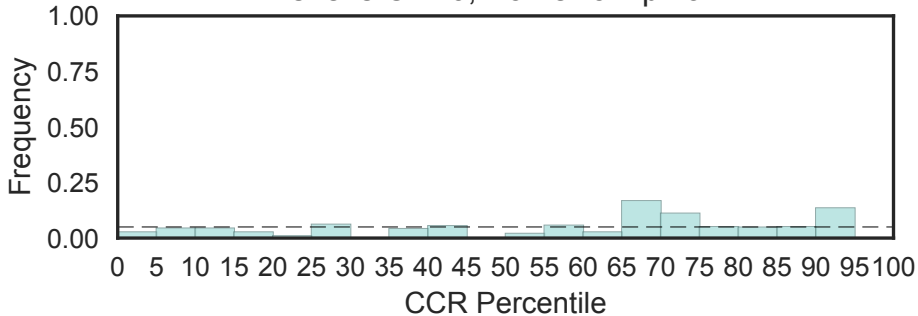

Nucleolar GTP-binding protein 1 (NOG1)  
(NOG1, N=1)

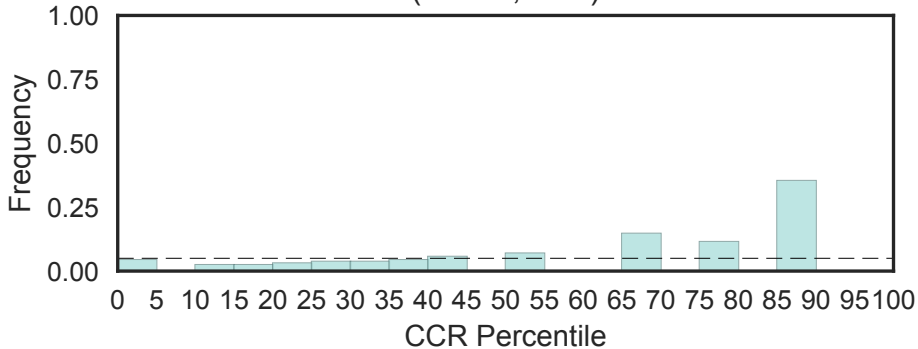

NOGCT (NUC087) domain  
(NOGCT, N=1)

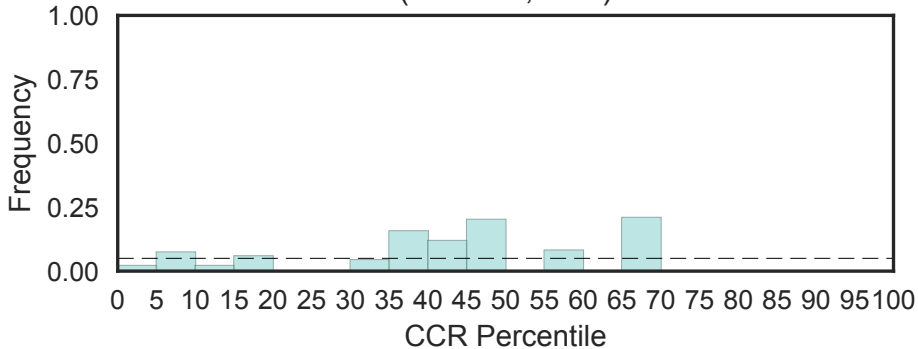



NOP5NT (NUC127) domain  
(NOP5NT, N=2)

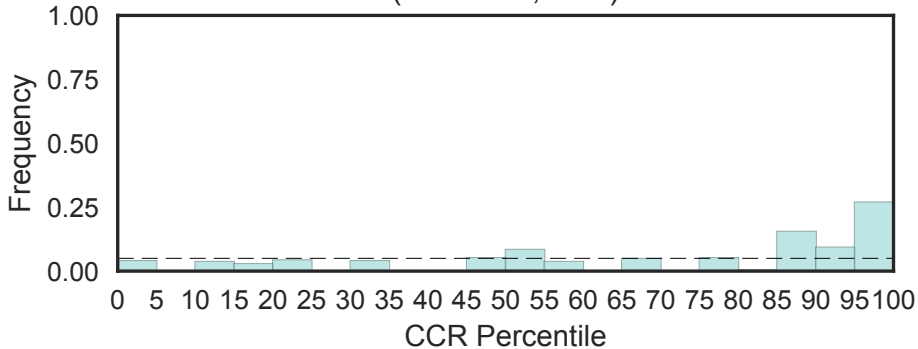

NOPS (NUC059) domain  
(NOPS, N=2)

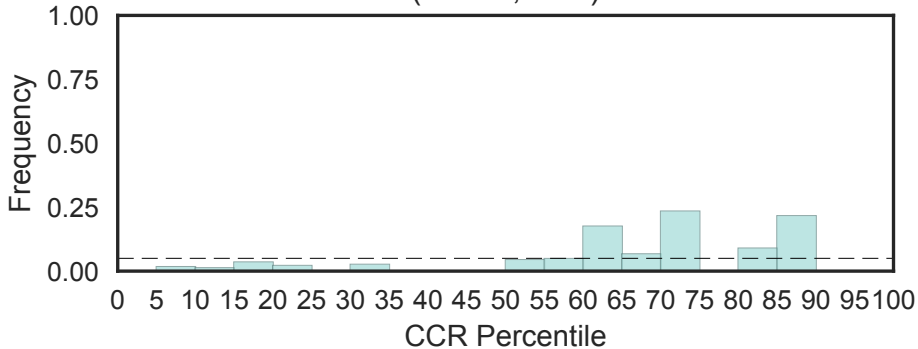

NOT2 / NOT3 / NOT5 family  
(NOT2\_3\_5, N=2)

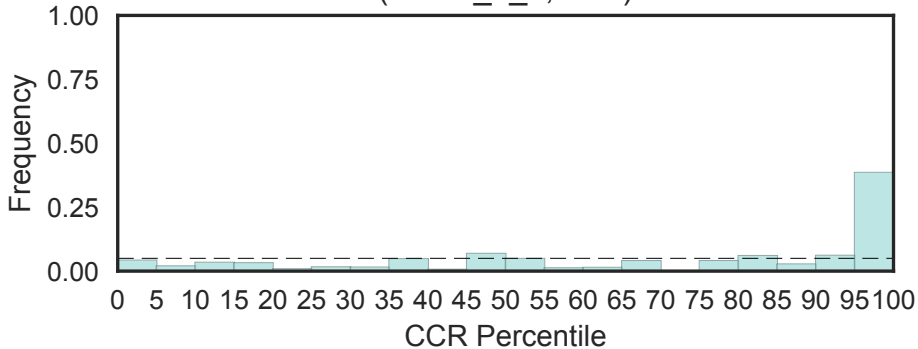

Nitric oxide synthase, oxygenase domain  
(NO\_synthase, N=3)

Fisher's OR: 1.26; Bonferroni p-val: 1

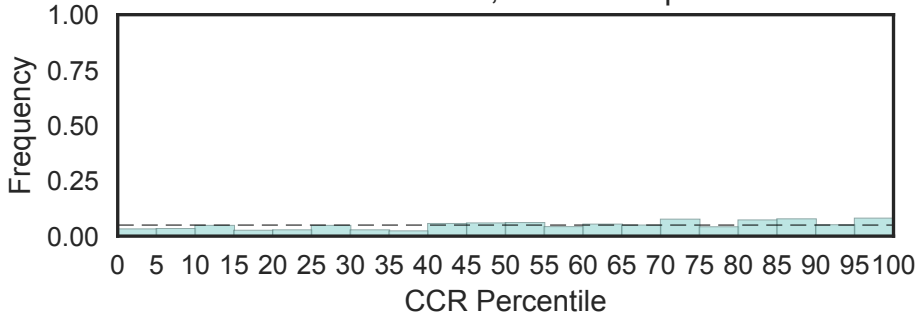

NPAT C terminus  
(NPAT\_C, N=1)

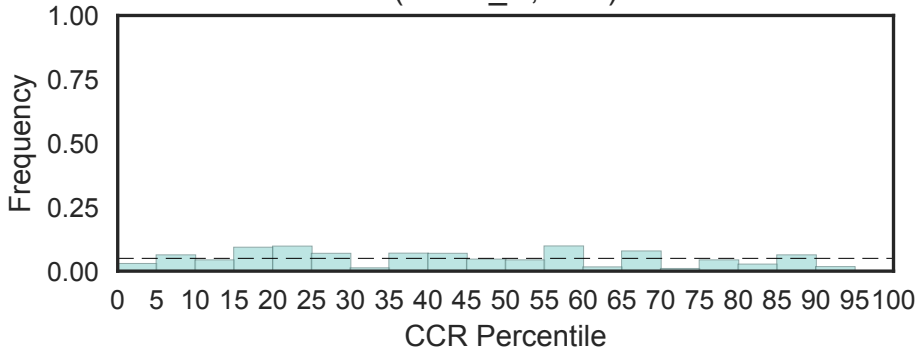

# Neuropeptides B and W (NPBW, N=2)

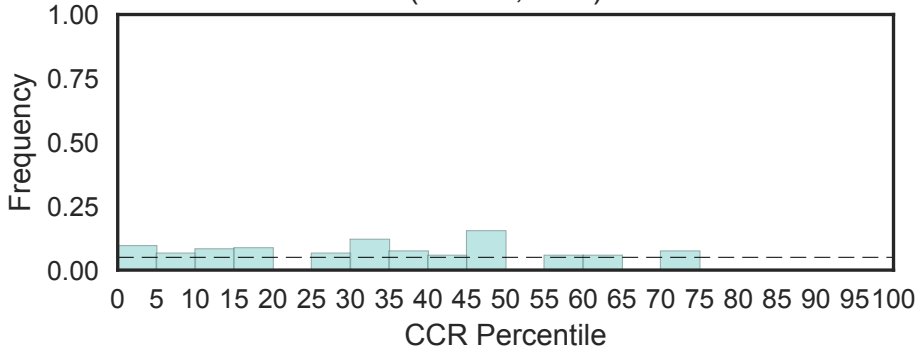

Niemann-Pick C1 N terminus  
(NPC1\_N, N=2)

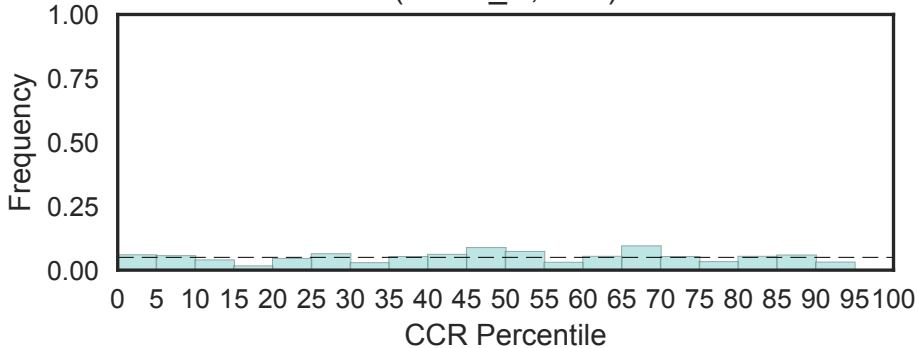

# Neural proliferation differentiation control-1 protein (NPDC1) (NPDC1, N=1)

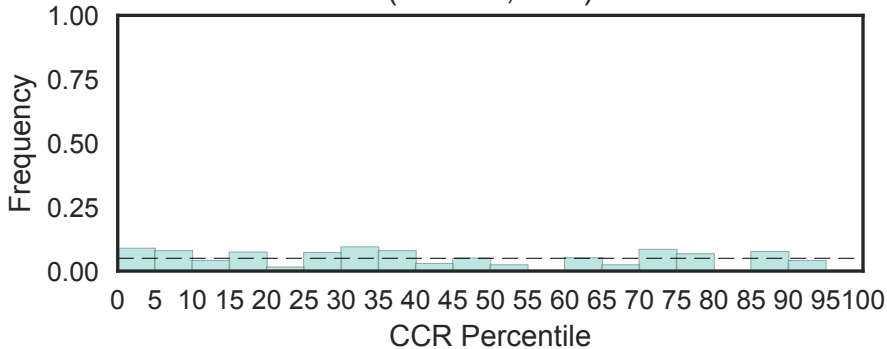



# Rab5yn-5 repeating NPF sequence-motif (NPF, N=1)

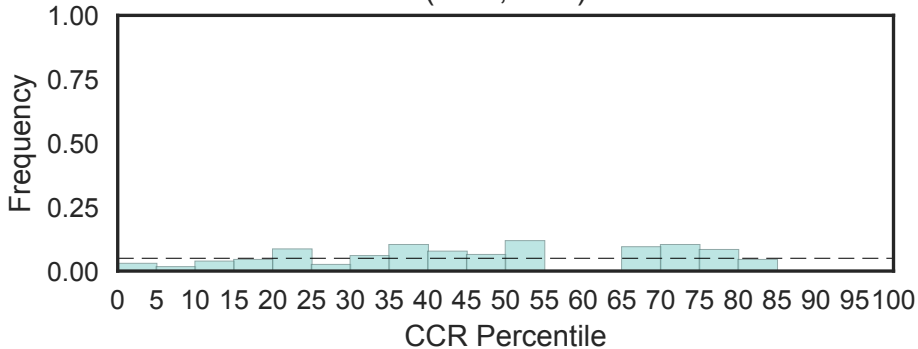

# Neuropeptide FF (NPFF, N=2)

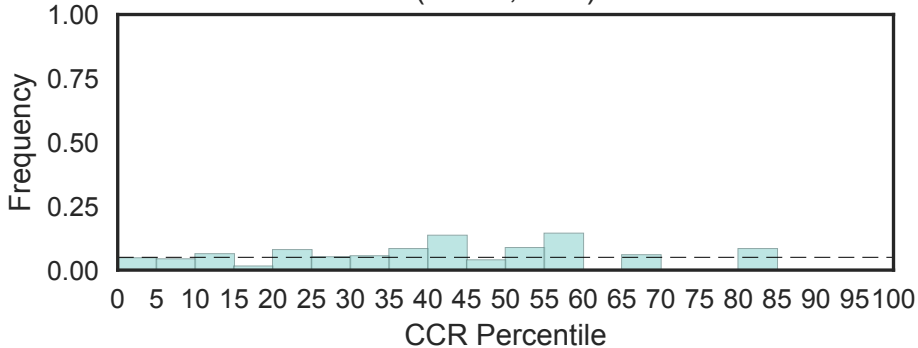

NPL4 family  
(NPL4, N=1)

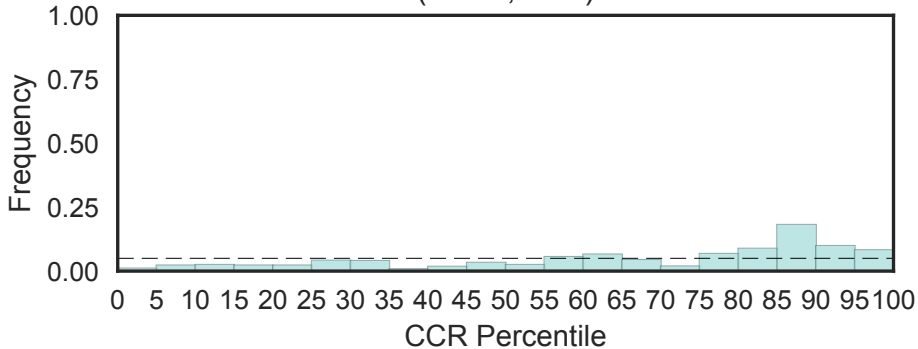

Nucleophosmin C-terminal domain  
(NPM1-C, N=1)

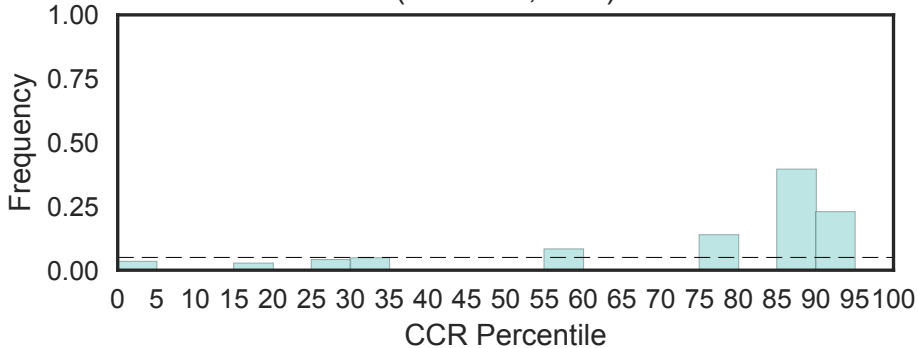

Pro-opiomelanocortin, N-terminal region  
(NPP, N=1)

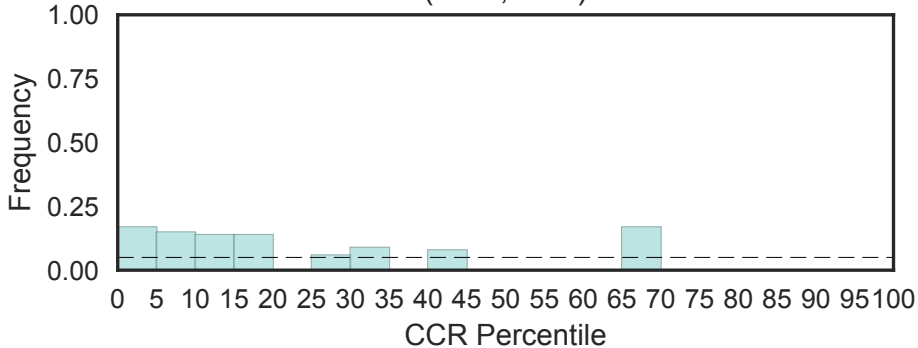

# Nitrogen permease regulator 2 (NPR2, N=2)

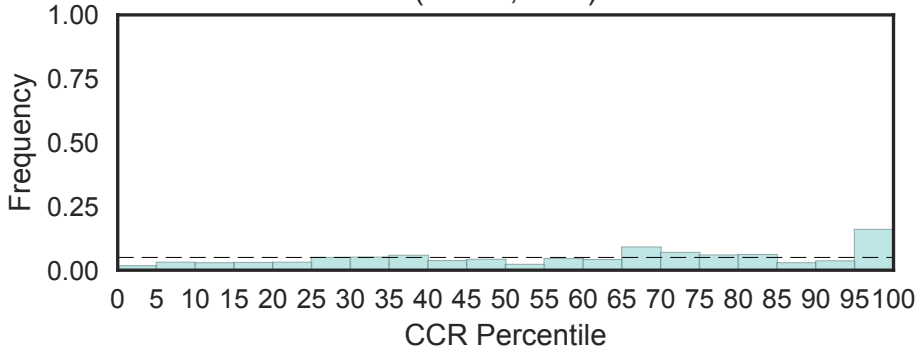

# Nuclear receptor-binding factor 2, autophagy regulator (NRBF2, N=2)

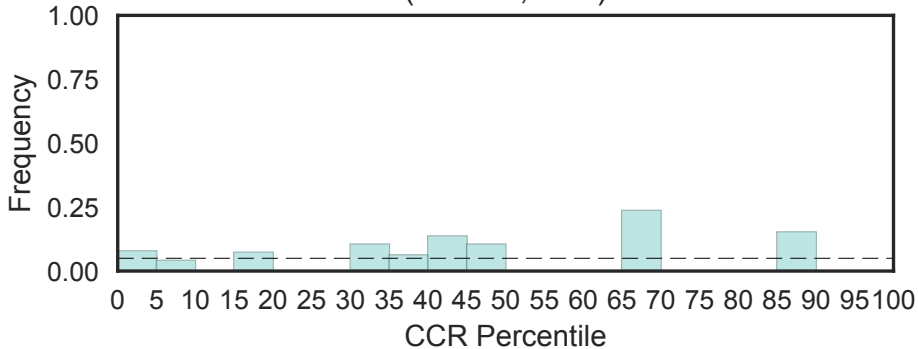

MIT domain of nuclear receptor-binding factor 2  
(NRBF2\_MIT, N=1)

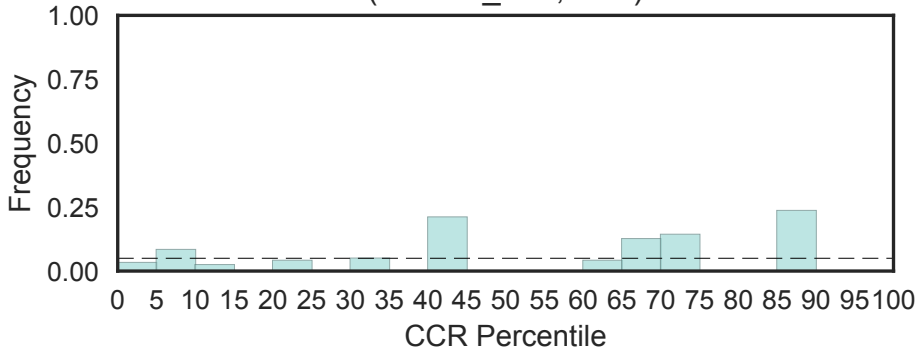



NRDE-2, necessary for RNA interference  
(NRDE-2, N=1)

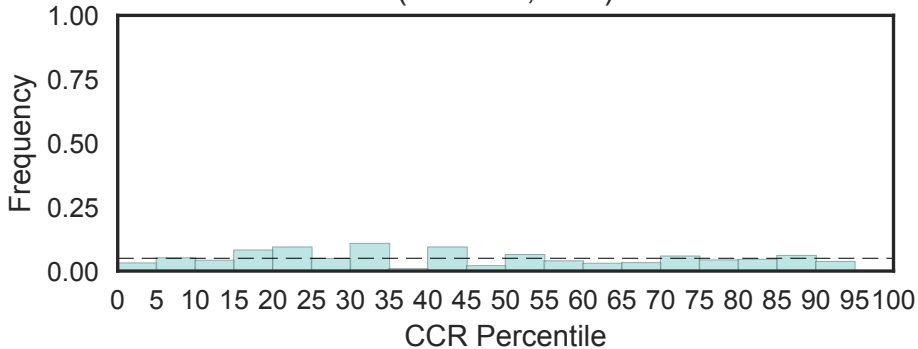

Nuclear receptor-interacting protein 1 repression 1  
(NRIP1\_repr\_1, N=1)

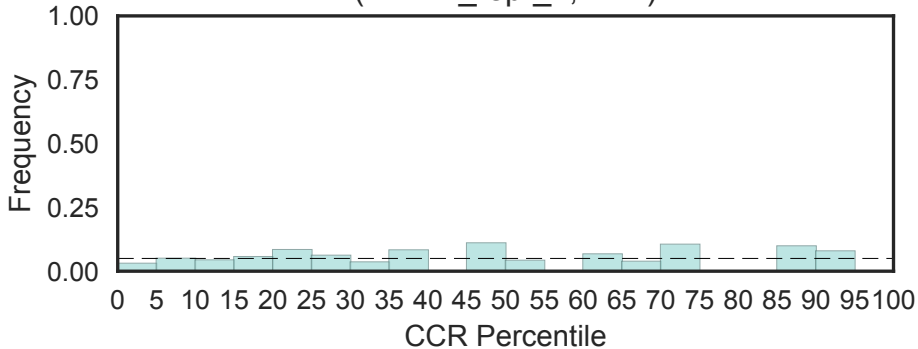

Nuclear receptor-interacting protein 1 repression 2  
(NRIP1\_repr\_2, N=1)

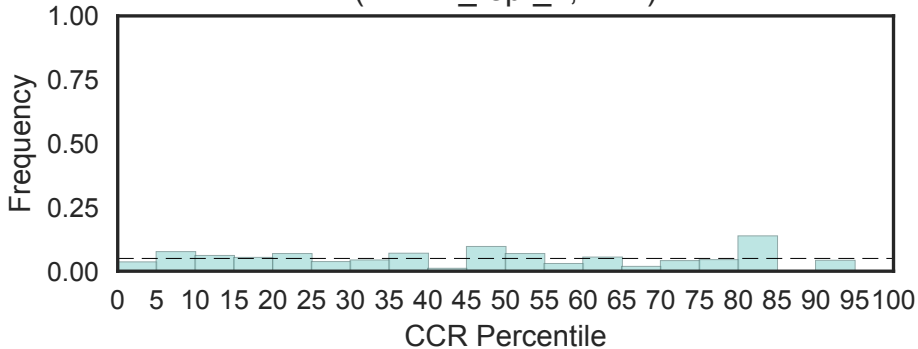

Nuclear receptor-interacting protein 1 repression 3  
(NRIP1\_repr\_3, N=1)

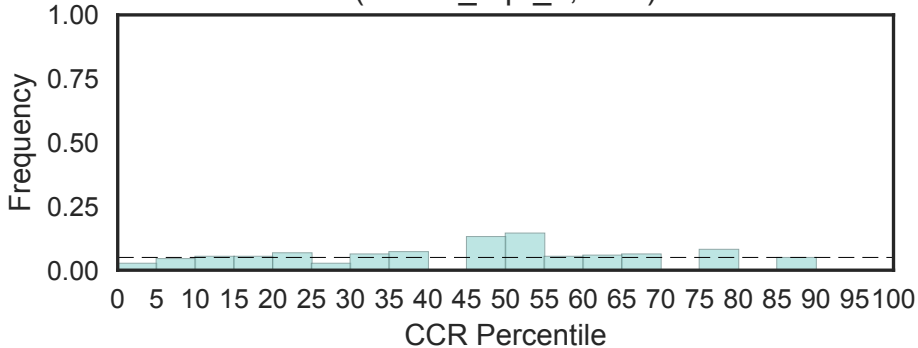

Nuclear receptor-interacting protein 1 repression 4  
(NRIP1\_repr\_4, N=1)

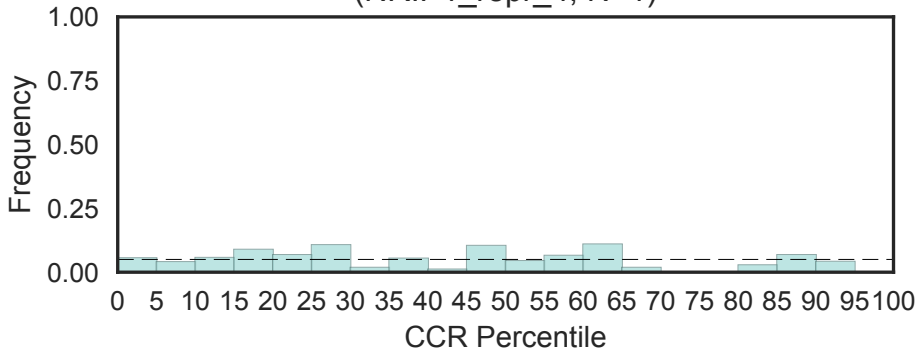

Neuritin protein family  
(NRN1, N=2)

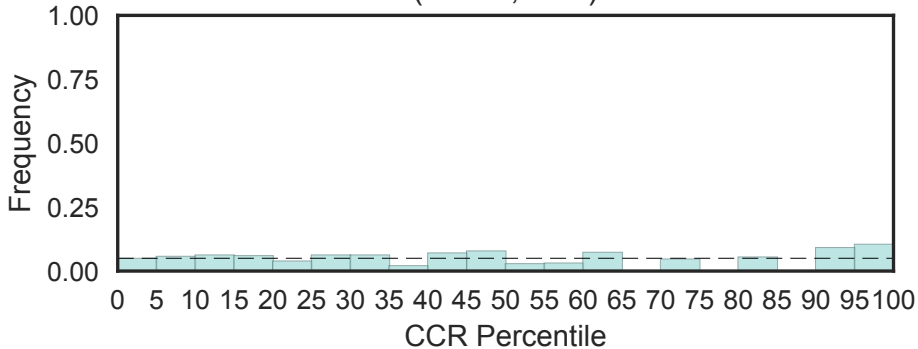

Aromatic-di-Alanine (AdAR) repeat  
(NSF, N=15)

Fisher's OR: 0; Bonferroni p-val: 1

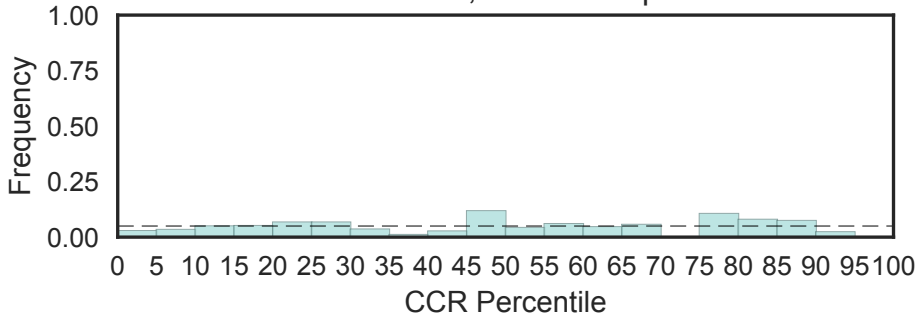

N-terminal C2 in EEIG1 and EHBP1 proteins  
(NT-C2, N=4)

Fisher's OR: 0.557; Bonferroni p-val: 1

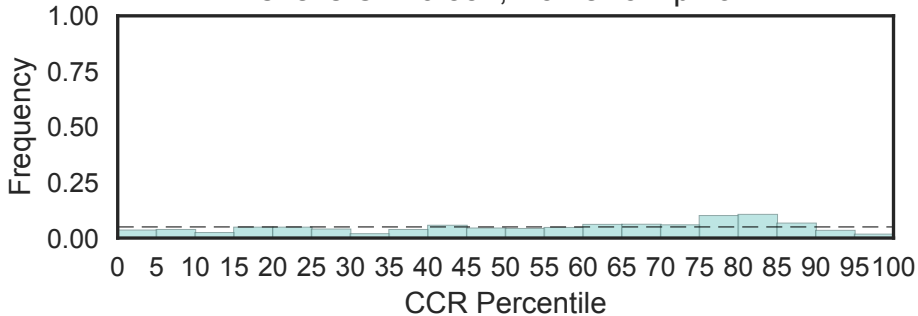



5' nucleotidase, deoxy (Pyrimidine), cytosolic type C protein (NT5C)  
(NT5C, N=2)

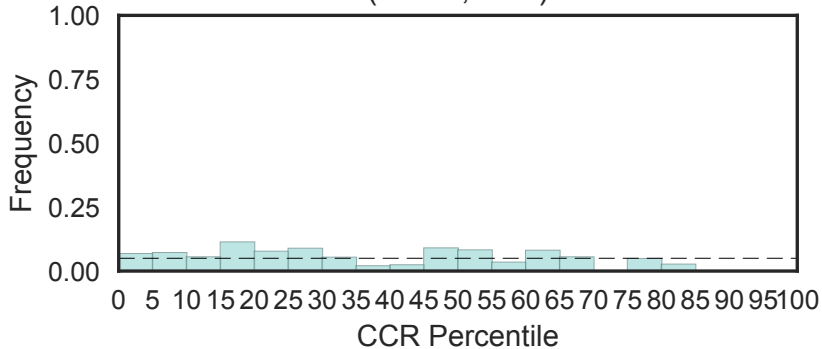

Nuclear transport factor 2 (NTF2) domain  
(NTF2, N=5)

Fisher's OR: 7.28; Bonferroni p-val: 0.486

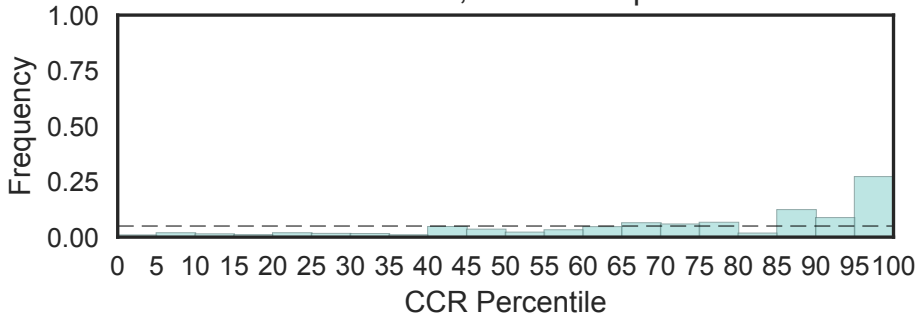

Nucleotidyltransferase domain  
(NTP\_transf\_2, N=12)

Fisher's OR: 6.1; Bonferroni p-val: 0.000467

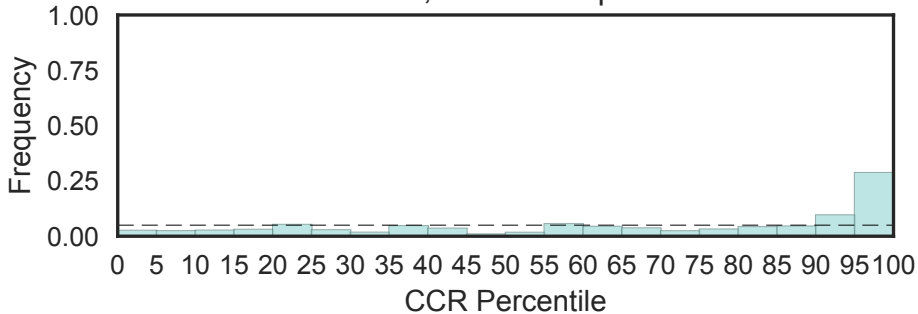

MobA-like NTP transferase domain  
(NTP\_transf\_3, N=5)

Fisher's OR: 1.32; Bonferroni p-val: 1

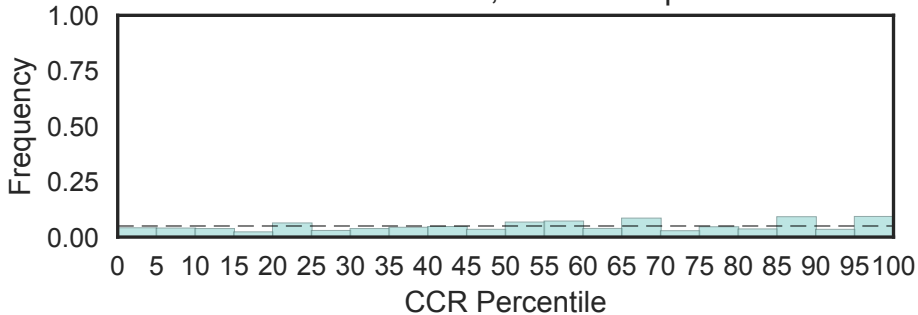

Nucleotidyltransferase  
(NTP\_transf\_7, N=3)

Fisher's OR: 0.342; Bonferroni p-val: 1

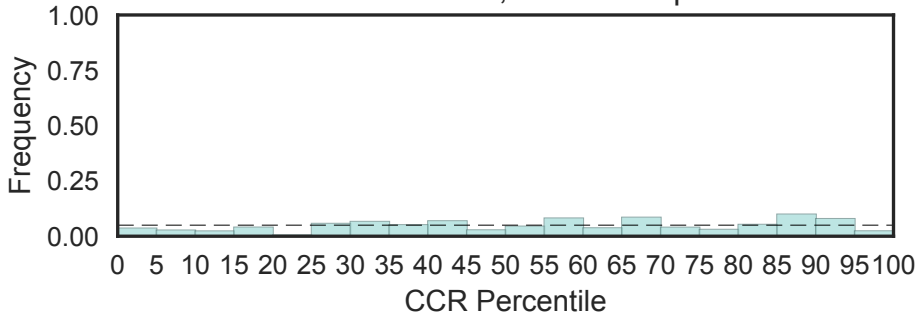

Nucleotidyl transferase  
(NTP\_transferase, N=3)

Fisher's OR: 0.546; Bonferroni p-val: 1

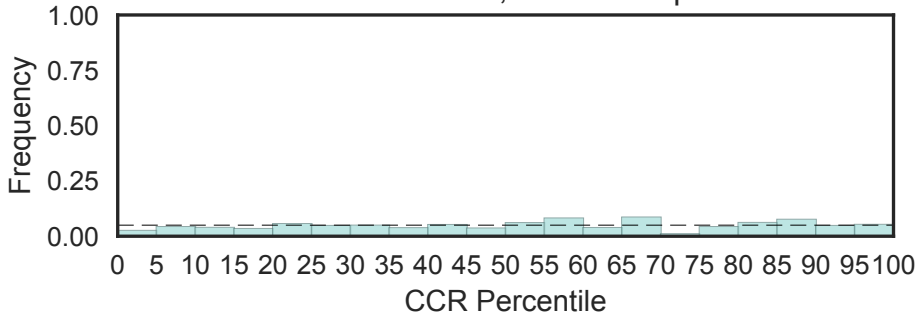

# NTPase (NTPase\_1, N=1)

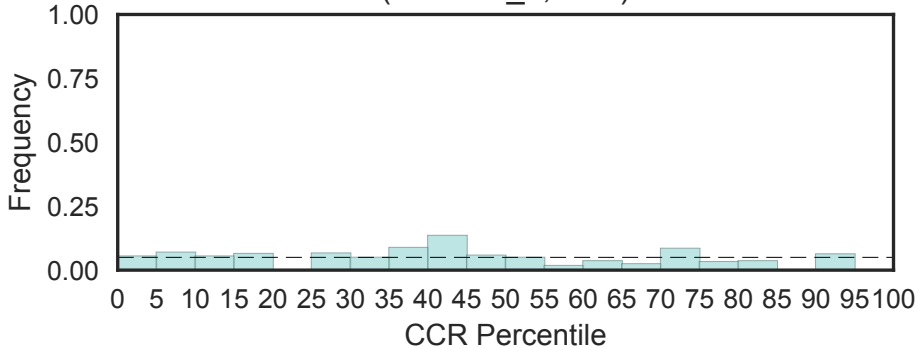

Protein of unknown function DUF84  
(NTPase\_I-T, N=1)

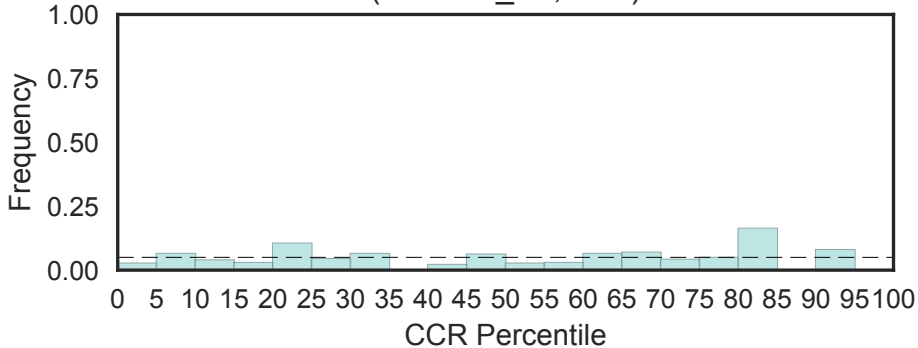



UNC-6/NTR/C345C module  
(NTR, N=17)

Fisher's OR: 0.426; Bonferroni p-val: 1

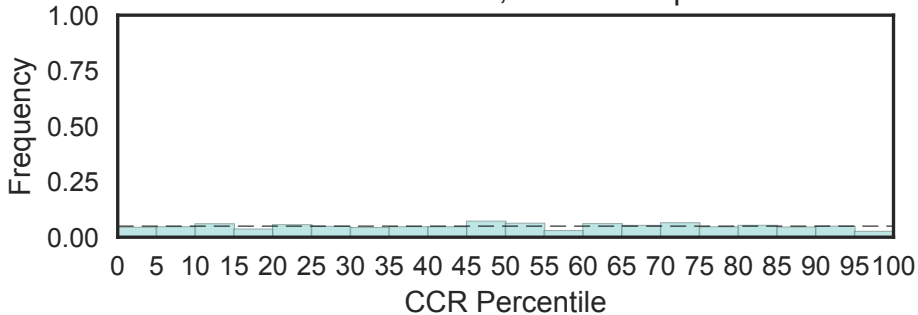

NUC129 domain  
(NUC129, N=2)

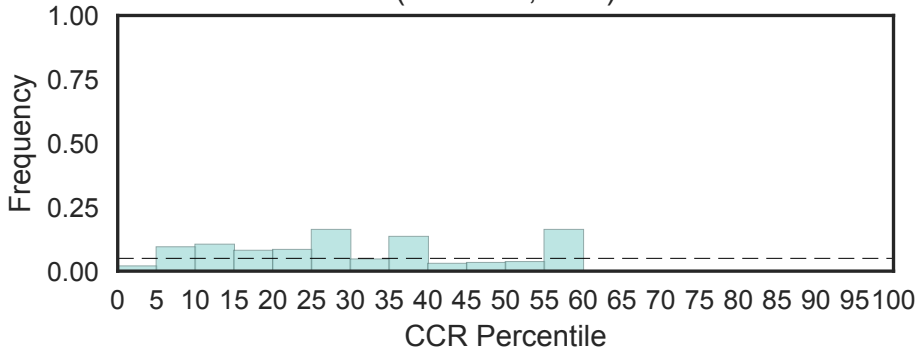

NUC130/3NT domain  
(NUC130\_3NT, N=1)

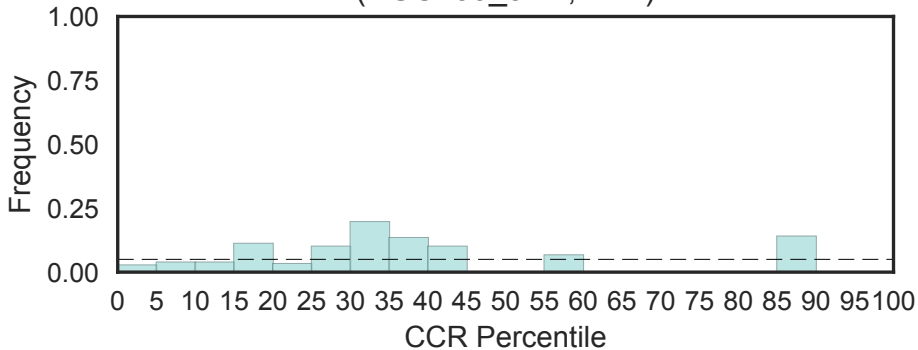

NUC153 domain  
(NUC153, N=2)

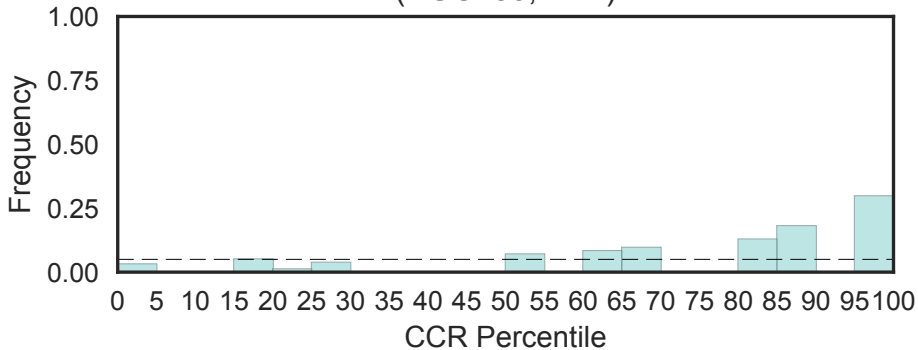

NUC173 domain  
(NUC173, N=1)

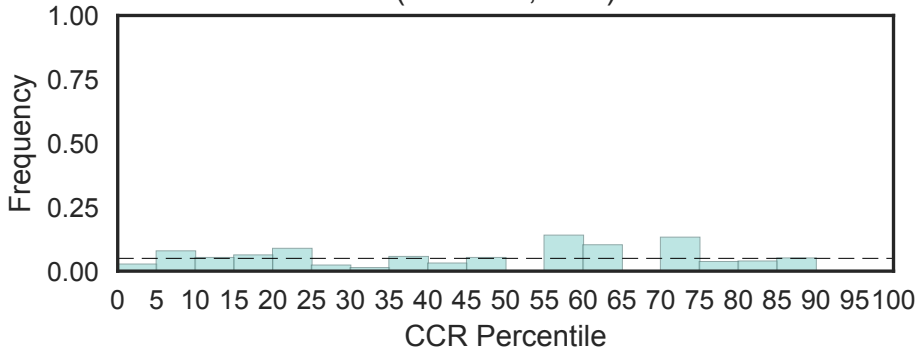

NUC194 domain  
(NUC194, N=1)

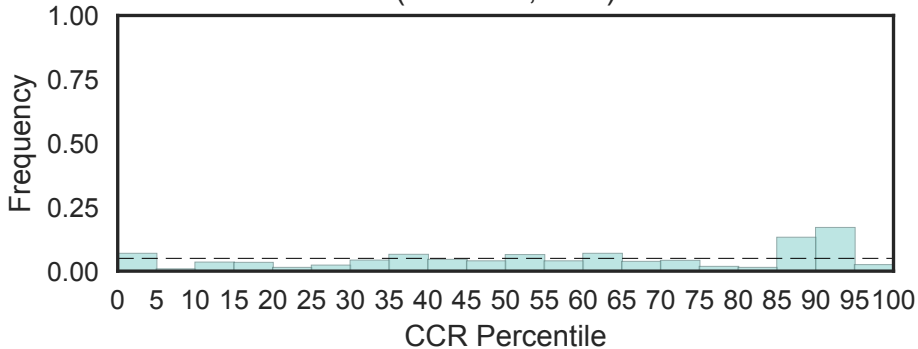

NUC202 domain  
(NUC202, N=2)

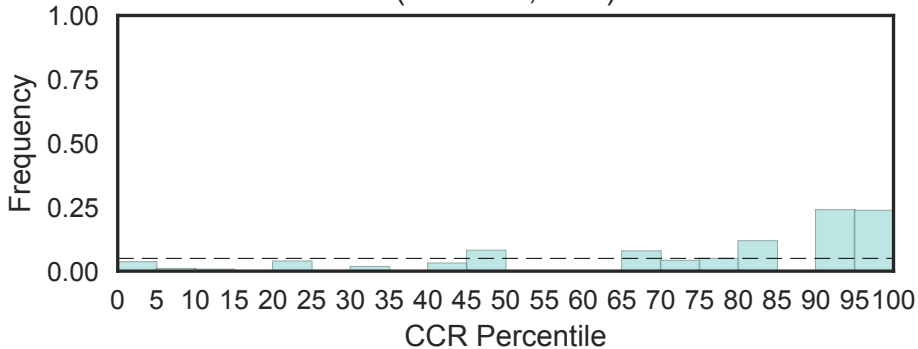

NUC205 domain  
(NUC205, N=1)

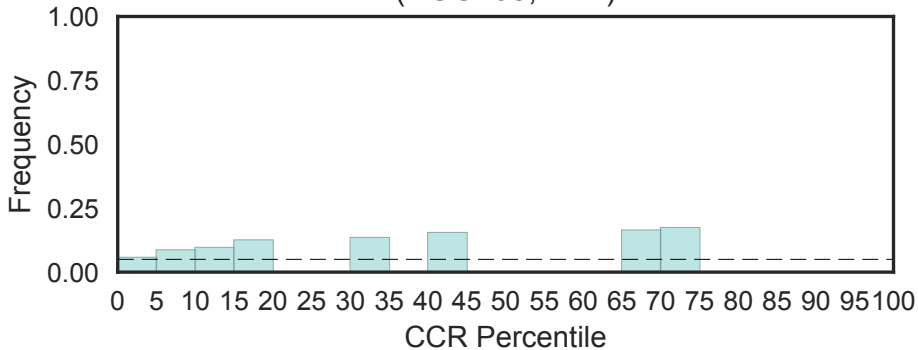



NUDE protein, C-terminal conserved region  
(NUDE\_C, N=2)

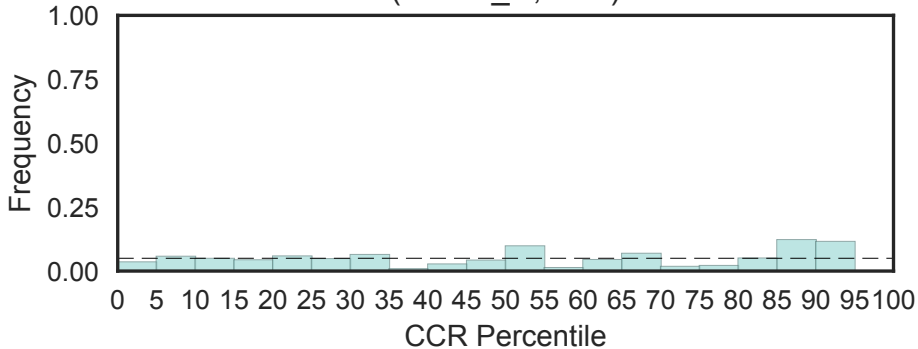

NUDIX domain  
(NUDIX, N=21)

Fisher's OR: 0.377; Bonferroni p-val: 1

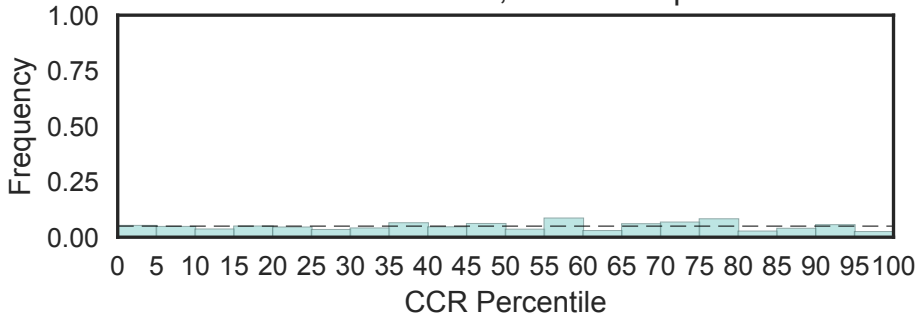

NADH pyrophosphatase-like rudimentary NUDIX domain  
(NUDIX-like, N=2)

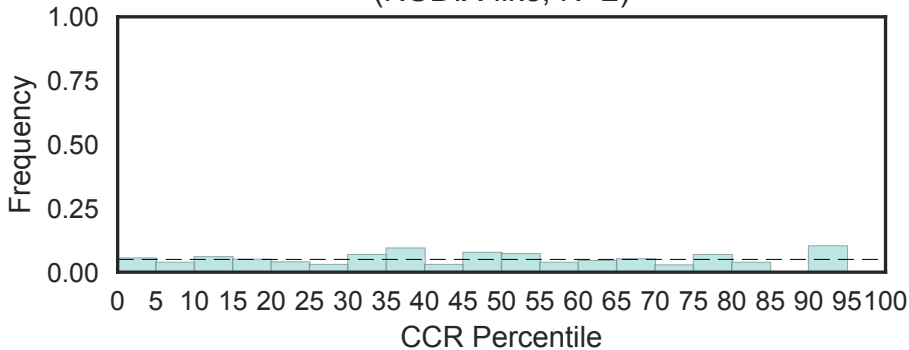

Nucleotide hydrolase  
(NUDIX\_2, N=1)

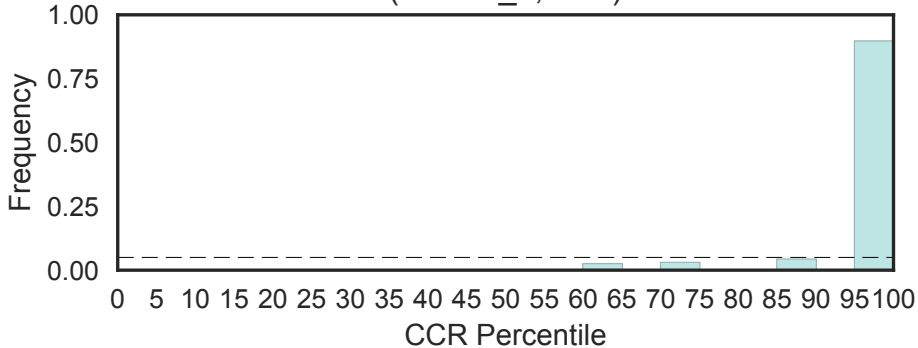

NUDIX domain  
(NUDIX\_4, N=1)

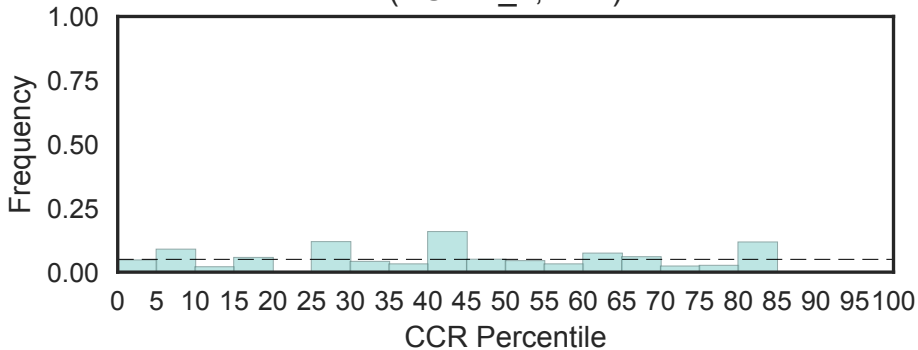

NUDIX, or N-terminal NPxY motif-rich, region of KRIT  
(NUDIX\_5, N=1)

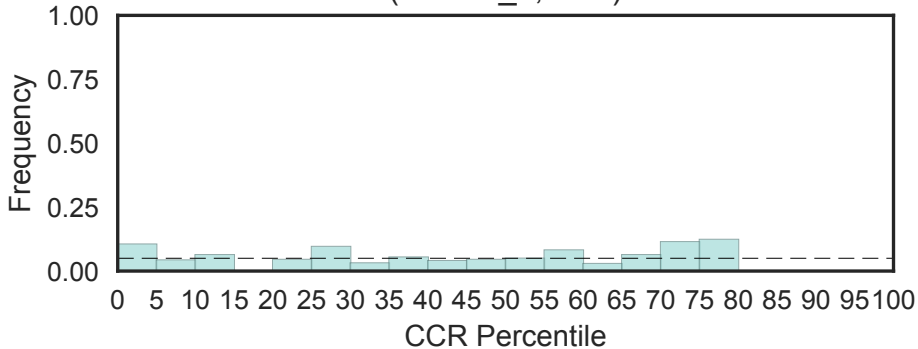

# Nuclear fragile X mental retardation-interacting protein 1 (NUFIP1) (NUFIP1, N=1)

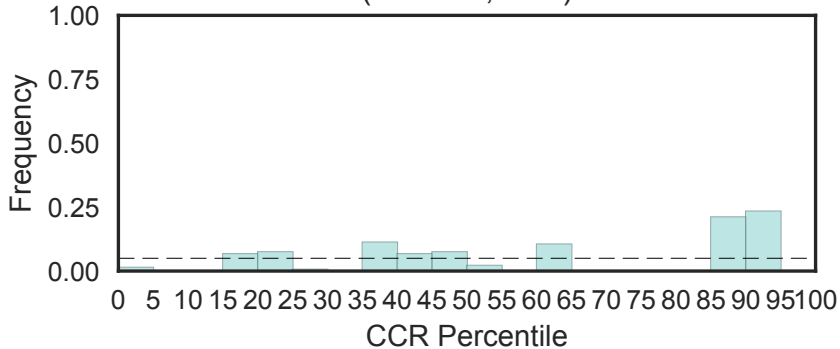

# Nuclear fragile X mental retardation-interacting protein 2 (NUFIP2, N=1)

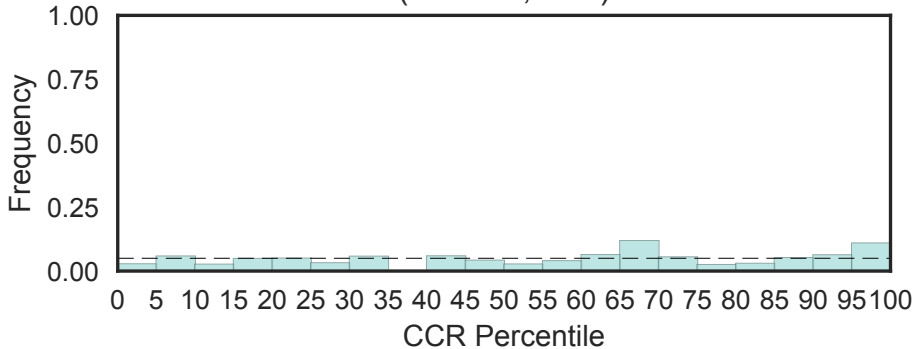



NUP50 (Nucleoporin 50 kDa)  
(NUP50, N=1)

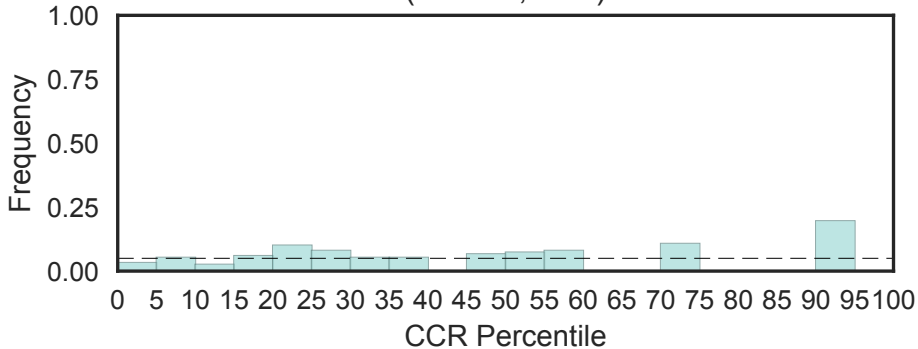

# Nucleolar and spindle-associated protein (NUSAP, N=1)

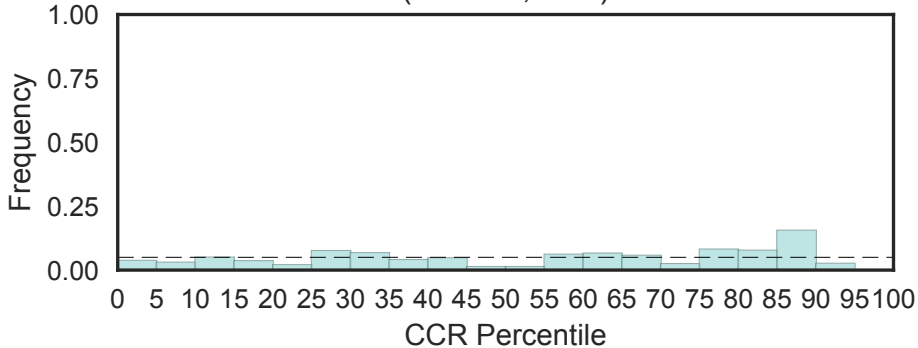

NUT protein  
(NUT, N=6)

Fisher's OR: 0; Bonferroni p-val: 1

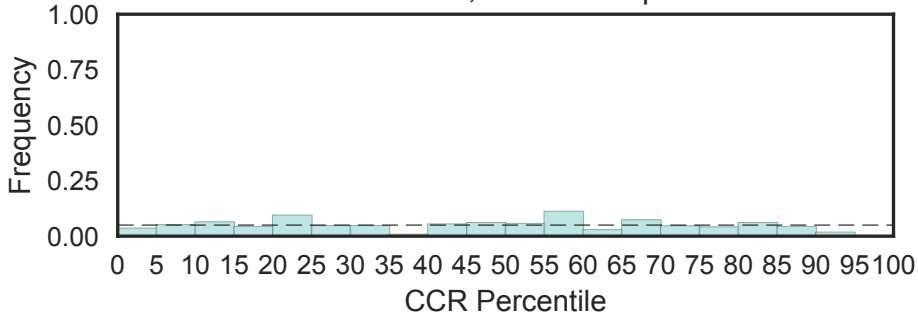

# Neuronal tyrosine-phosphorylated phosphoinositide-3-kinase adapter (NYAP\_C, N=2)

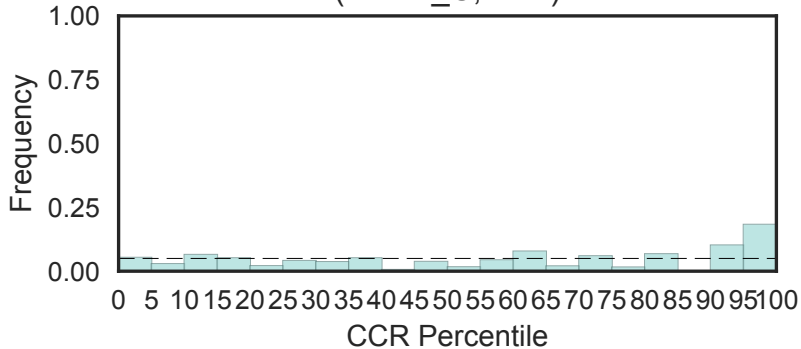

# Neuronal tyrosine-phosphorylated phosphoinositide-3-kinase adapter (NYAP\_N, N=3)

Fisher's OR: 1.17; Bonferroni p-val: 1

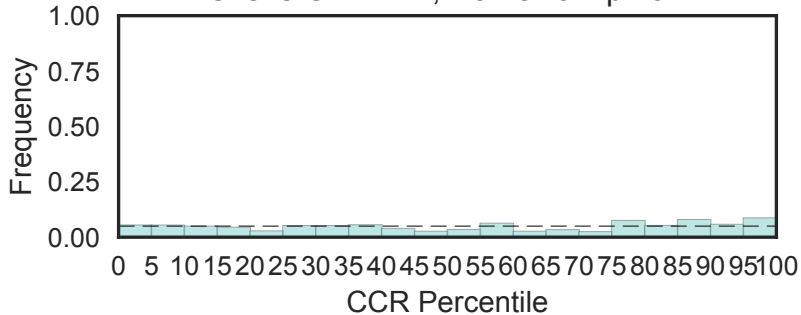

Spermatogenesis-associated, N-terminal  
(NYD-SP12\_N, N=1)

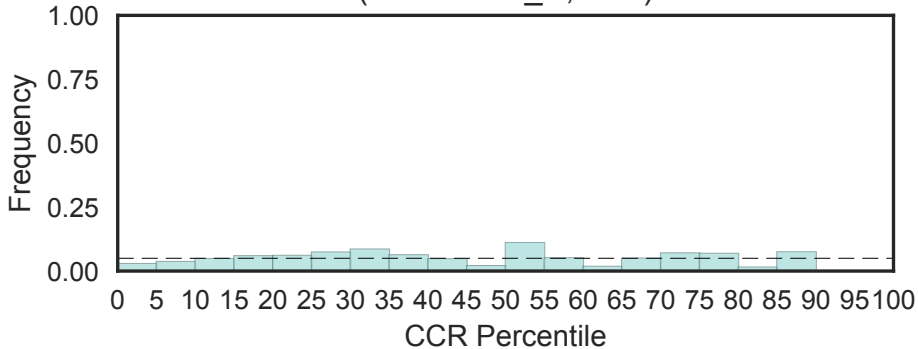

Sperm tail  
(NYD-SP28, N=2)

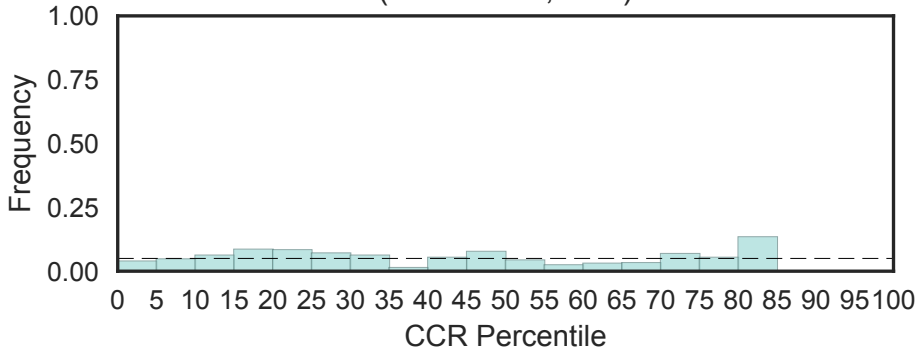

Sperm tail C-terminal domain  
(NYD-SP28\_assoc, N=1)

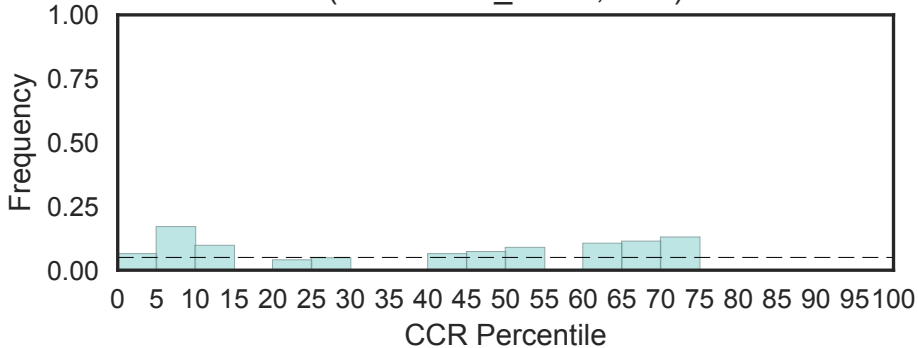



NYN domain  
(NYN, N=1)

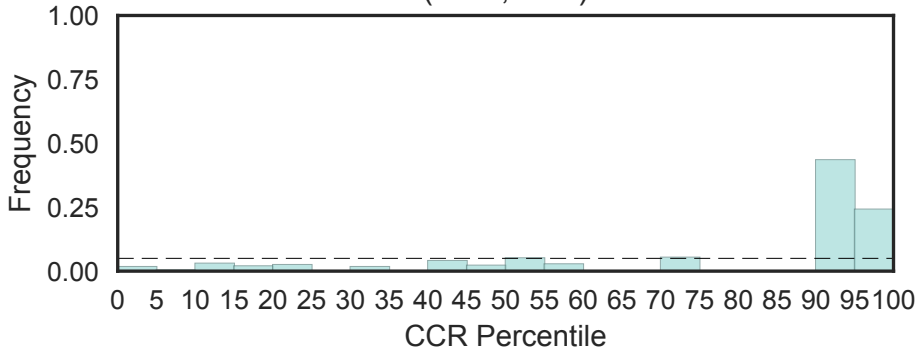

Protein N-terminal asparagine amidohydrolase  
(N\_Asn\_amidohyd, N=1)

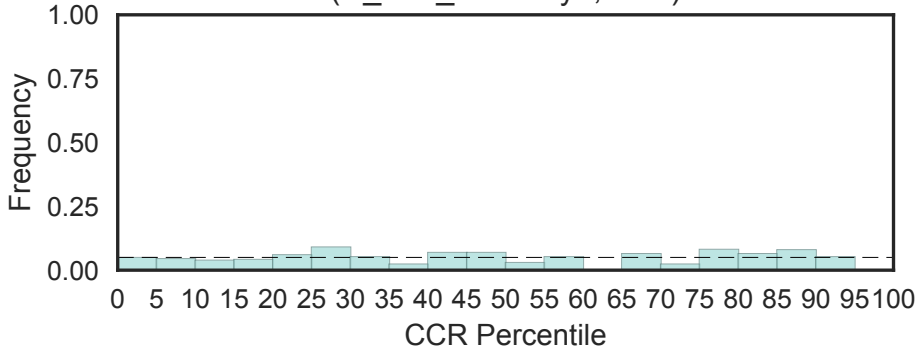

Ig-like domain from next to BRCA1 gene  
(N\_BRCA1\_IG, N=2)

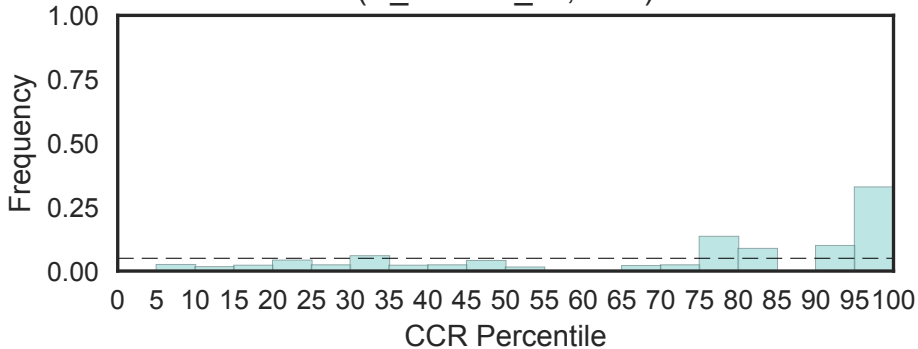

Sodium/calcium exchanger protein  
(Na\_Ca\_ex, N=18)

Fisher's OR: 1.61; Bonferroni p-val: 1

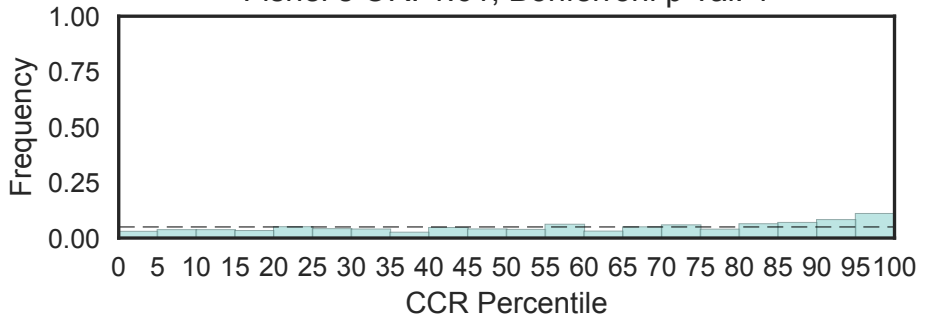

C-terminal extension of sodium/calcium exchanger domain  
(Na\_Ca\_ex\_C, N=3)

Fisher's OR: 0.924; Bonferroni p-val: 1

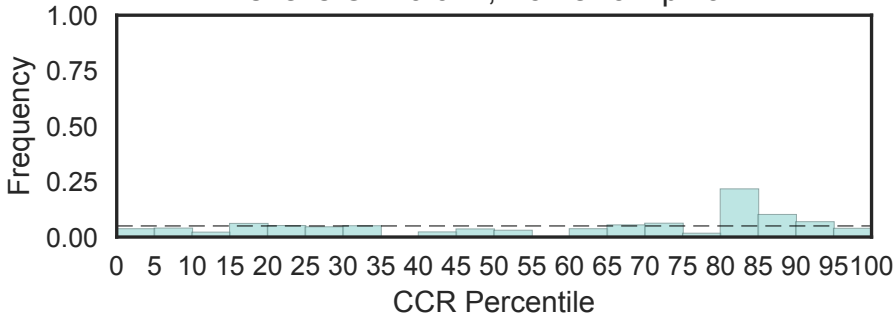

Sodium/hydrogen exchanger family  
(Na\_H\_Exchanger, N=13)  
Fisher's OR: 1.08; Bonferroni p-val: 1

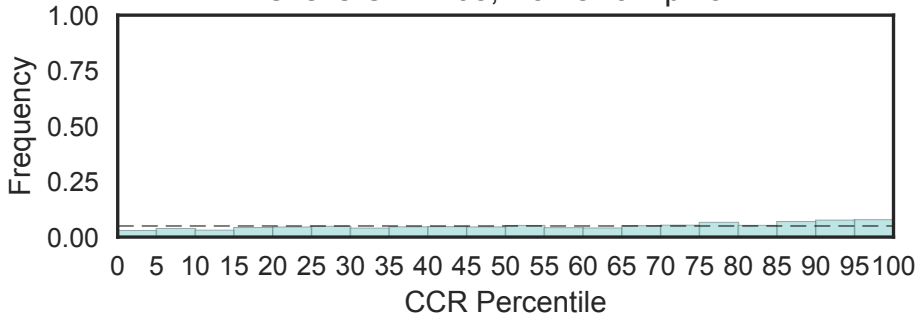

Sodium / potassium ATPase beta chain  
(Na\_K-ATPase, N=4)

Fisher's OR: 1.17; Bonferroni p-val: 1

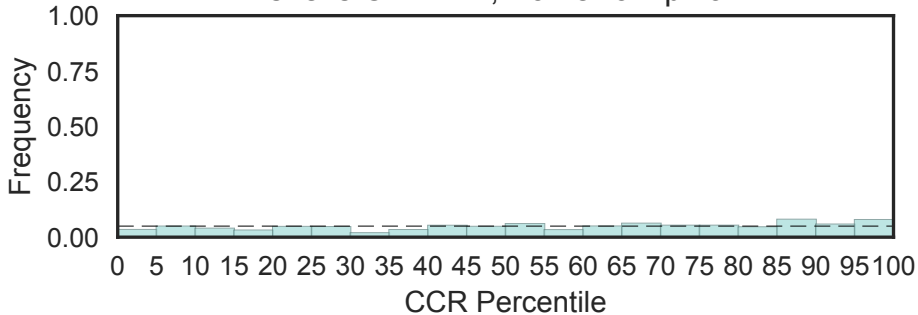

Na<sup>+</sup>/Pi-cotransporter  
(Na\_Pi\_cotrans, N=6)

Fisher's OR: 0; Bonferroni p-val: 1

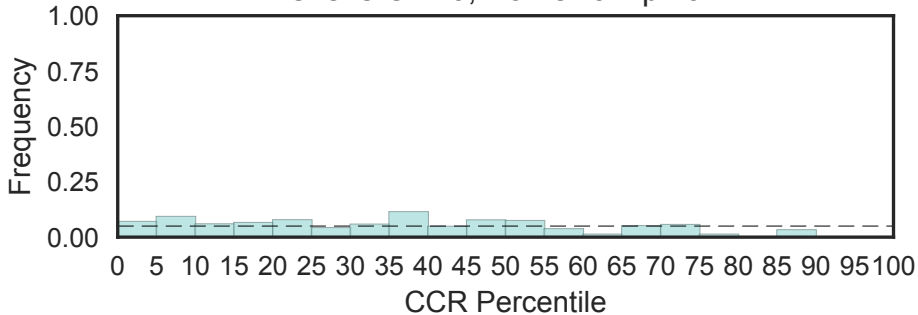



Sodium:sulfate symporter transmembrane region  
(Na\_sulph\_symp, N=8)

Fisher's OR: 0.25; Bonferroni p-val: 1

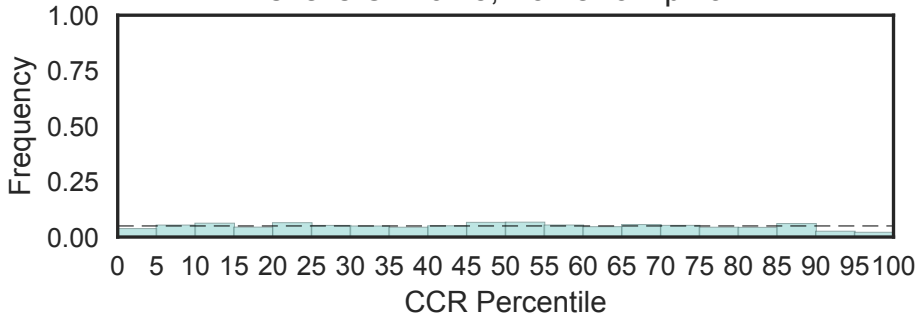

Sodium ion transport-associated  
(Na\_trans\_assoc, N=10)  
Fisher's OR: 0.52; Bonferroni p-val: 1

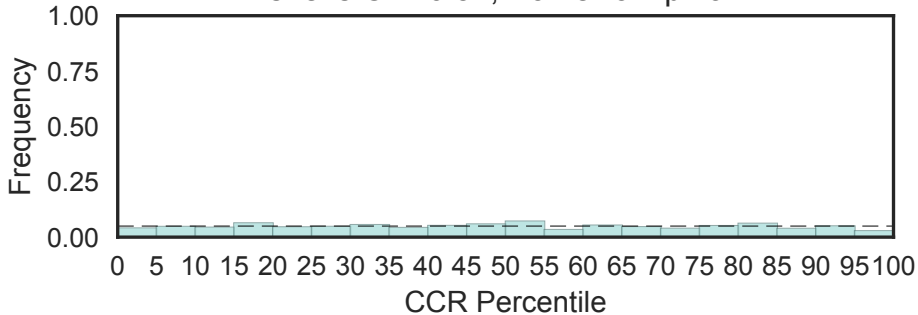

Cytoplasmic domain of voltage-gated Na<sup>+</sup> ion channel  
(Na\_trans\_cytopl, N=6)

Fisher's OR: 0.465; Bonferroni p-val: 1

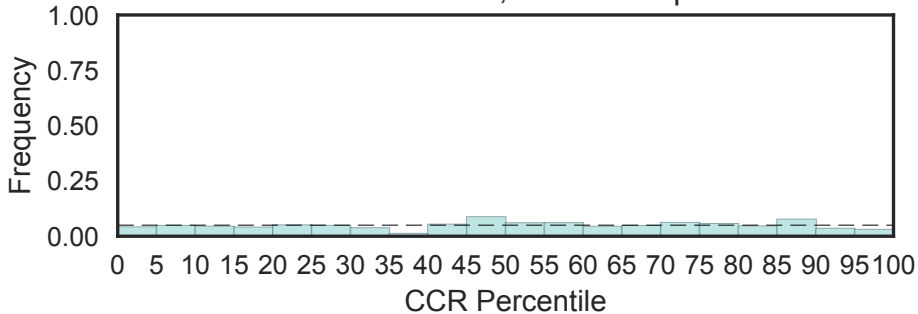

Conserved region in Nab1  
(Nab1, N=1)

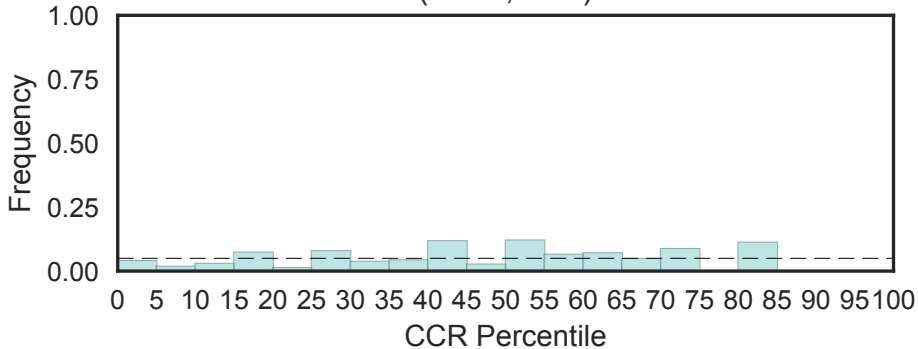

Putative N-acetylmannosamine-6-phosphate epimerase  
(NanE, N=1)

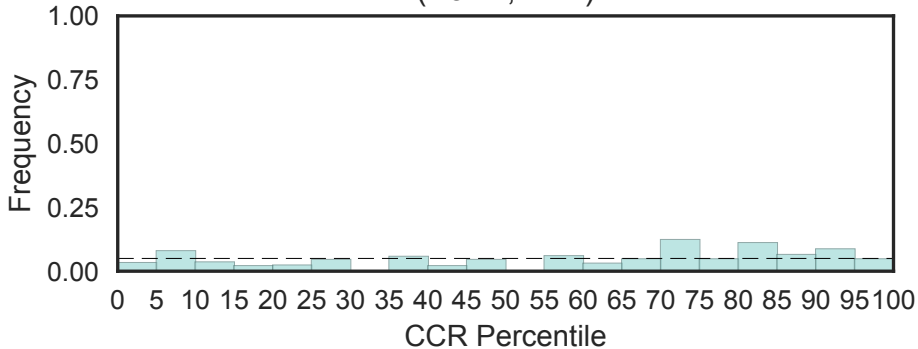

# N-acetyltransferase B complex (NatB) non catalytic subunit (NatB\_MDM20, N=1)

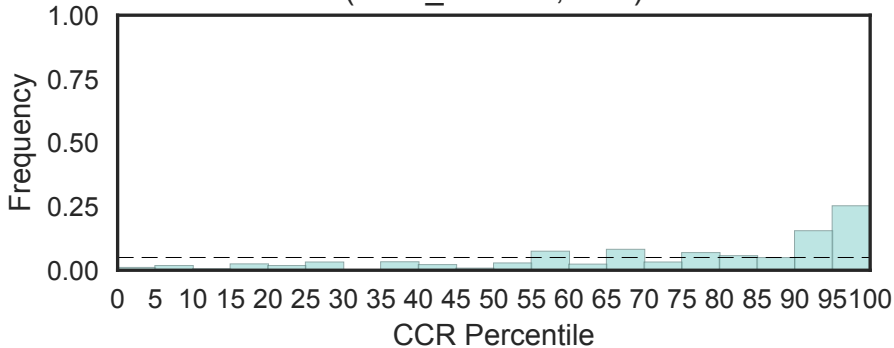

Neuroblastoma-amplified sequence, N terminal  
(Nbas\_N, N=1)

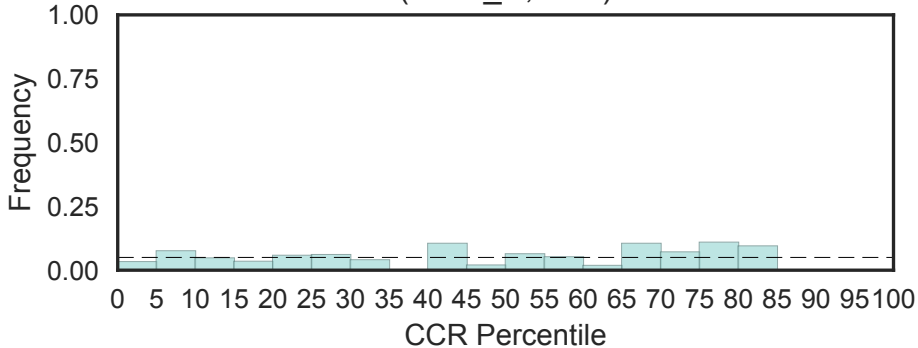

Nbl1 / Borealin N terminal  
(Nbl1\_Borealin\_N, N=1)

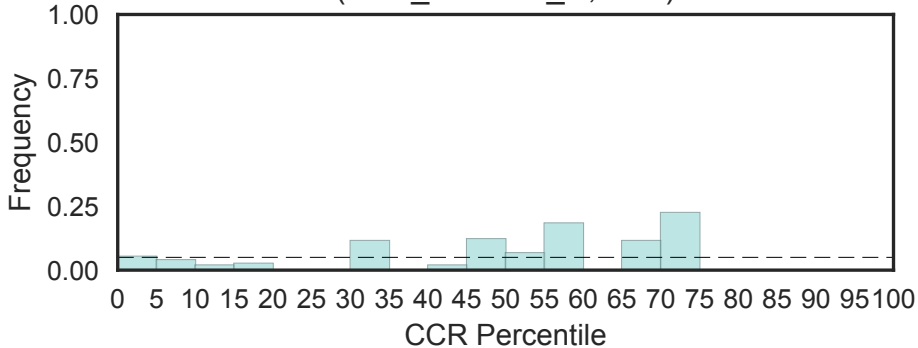



DNA damage repair protein Nbs1  
(Nbs1\_C, N=1)

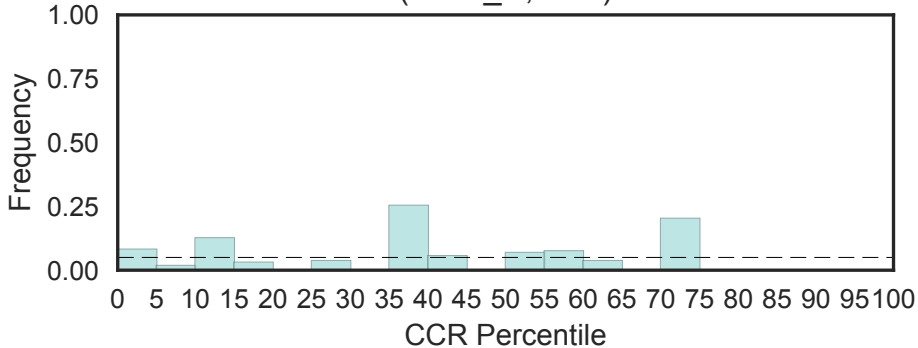

Membrane-associated apoptosis protein  
(Nckap1, N=2)

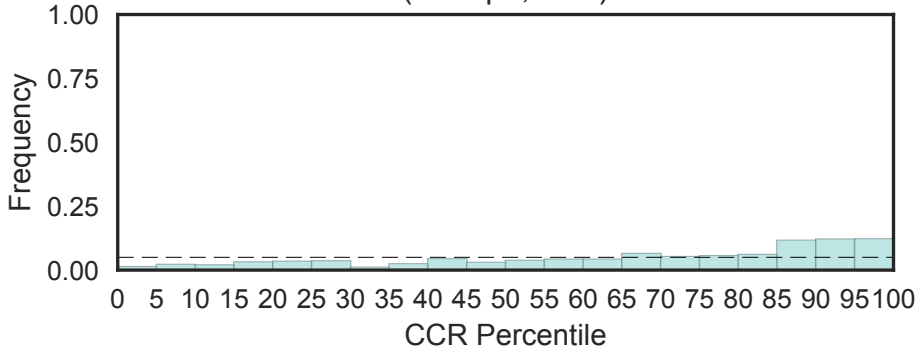

Nucleoporin protein Ndc1-Nup  
(Ndc1\_Nup, N=1)

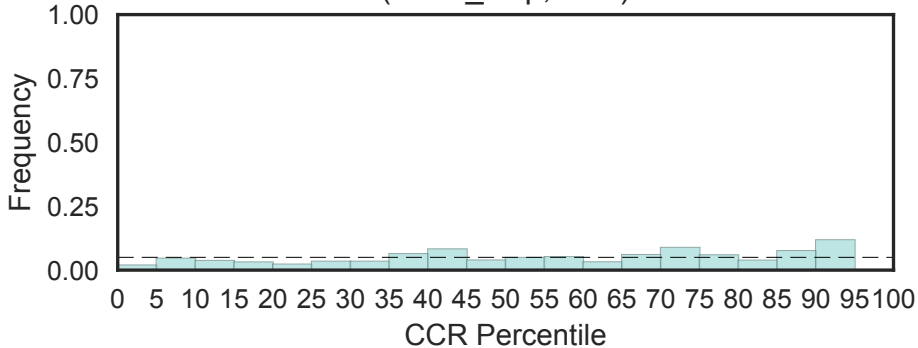

HEC/Ndc80p family  
(Ndc80\_HEC, N=1)

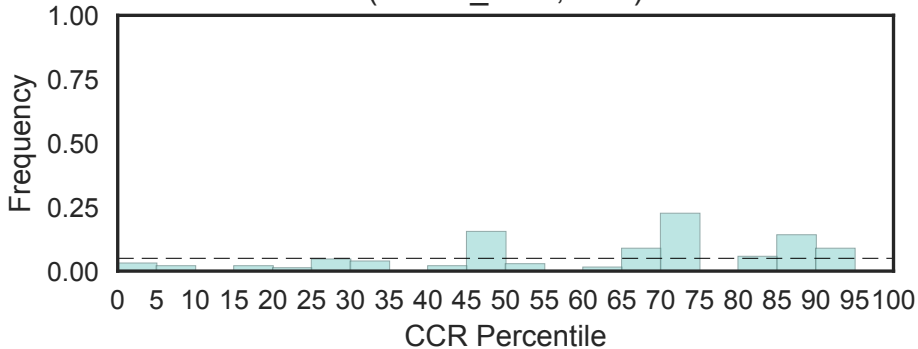

Ndr family  
(Ndr, N=5)

Fisher's OR: 0.173; Bonferroni p-val: 1

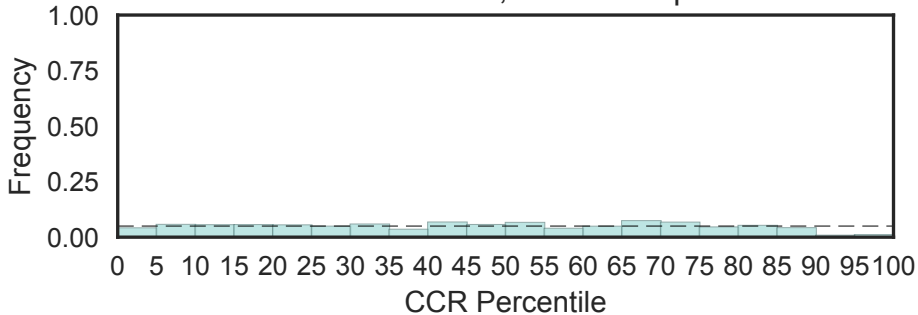

NADH:ubiquinone oxidoreductase, NDUFS5-15kDa  
(Ndufs5, N=1)

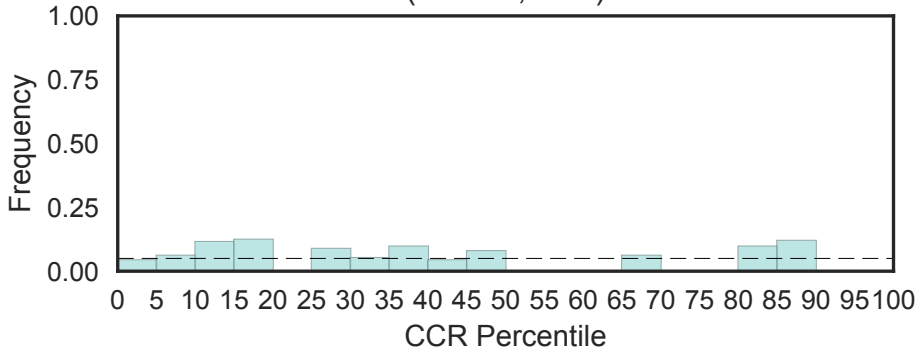

Nebulin repeat  
(Nebulin, N=114)

Fisher's OR: 0.455; Bonferroni p-val: 1

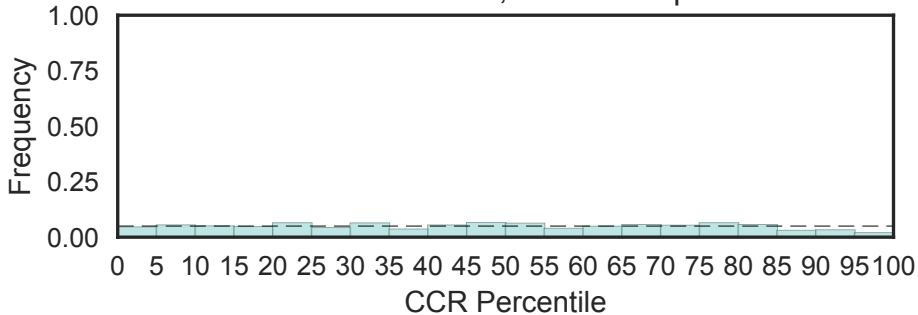

N-terminal domain of NEFA-interacting nuclear protein NIP30  
(Nefa\_Nip30\_N, N=1)

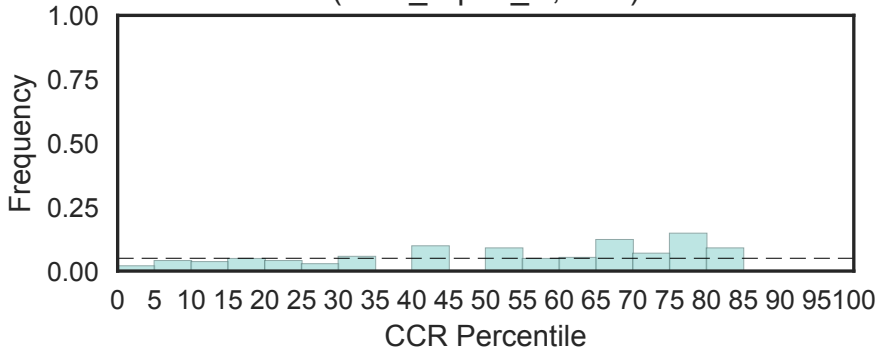



Endonuclease VIII-like 1, DNA bind  
(Neil1-DNA\_bind, N=1)

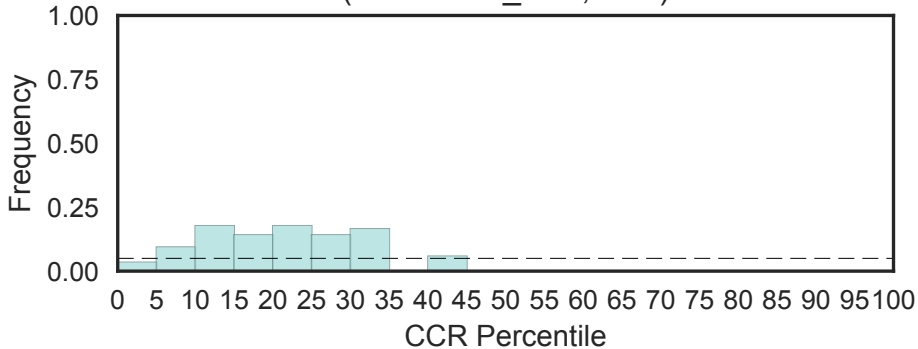

Neogenin C-terminus  
(Neogenin\_C, N=2)

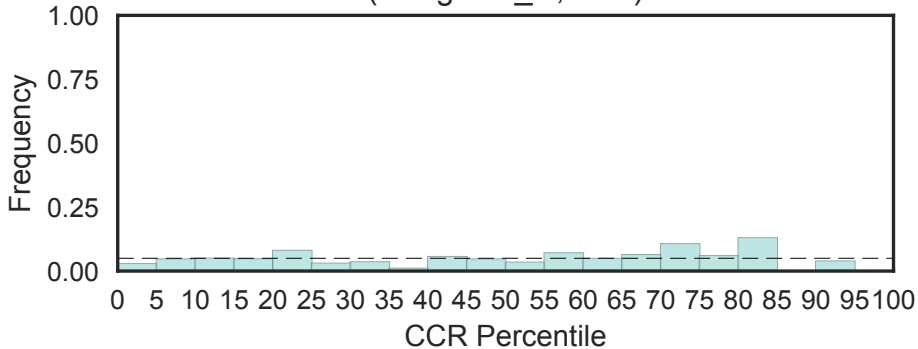

NeuB family  
(NeuB, N=1)

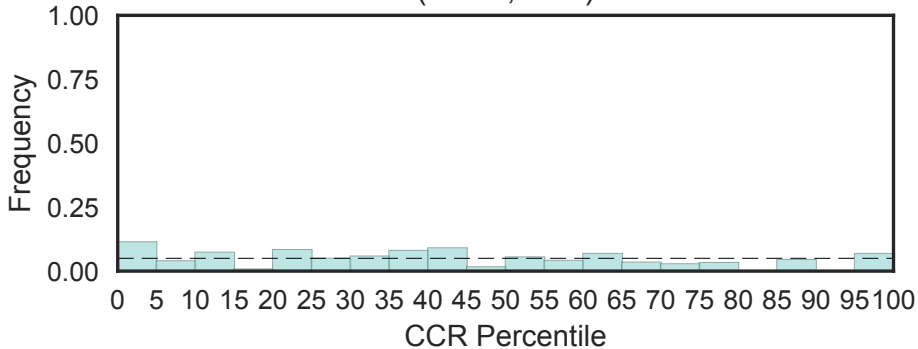

# Neugrin (Neugrin, N=1)

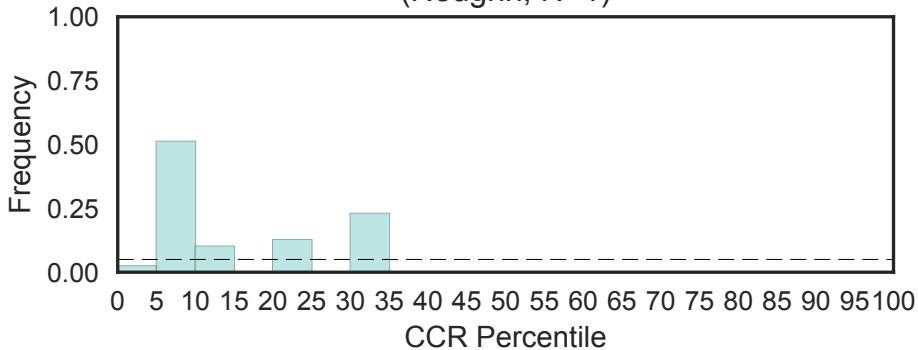

Neurotransmitter-gated ion-channel ligand binding domain  
(Neur\_chan\_LBD, N=43)

Fisher's OR: 1.35; Bonferroni p-val: 1

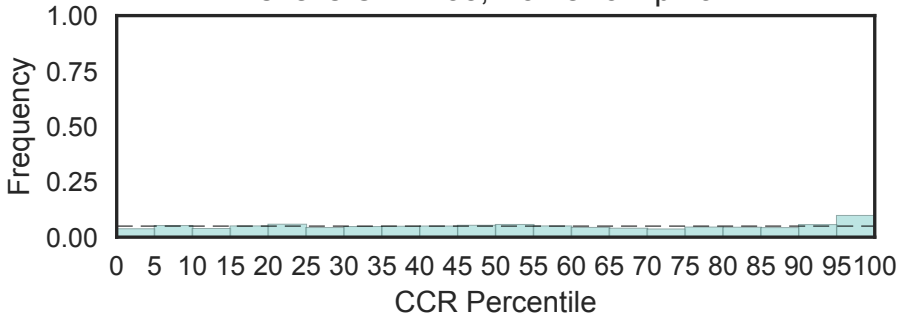

Neurotransmitter-gated ion-channel transmembrane region  
(Neur\_chan\_memb, N=47)

Fisher's OR: 1.11; Bonferroni p-val: 1

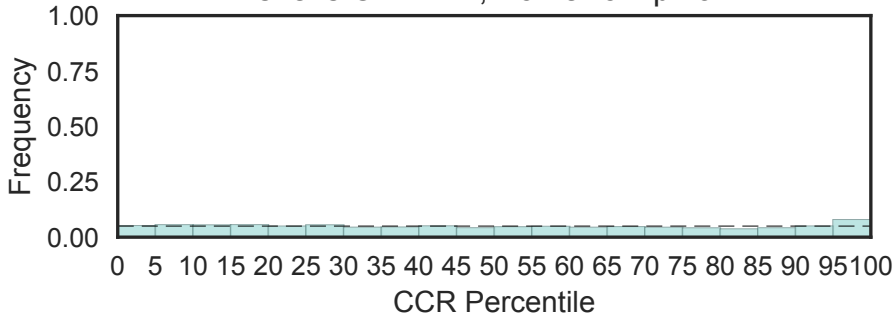

Neural chondroitin sulphate proteoglycan cytoplasmic domain  
(Neural\_ProG\_Cyt, N=1)

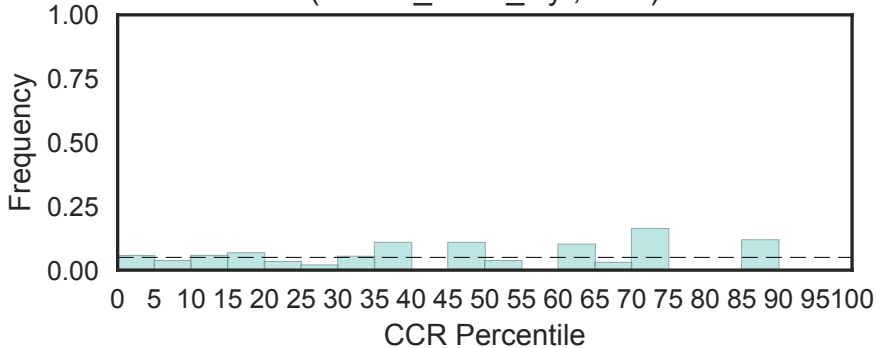

Neutralized  
(Neutralized, N=12)  
Fisher's OR: 0.901; Bonferroni p-val: 1

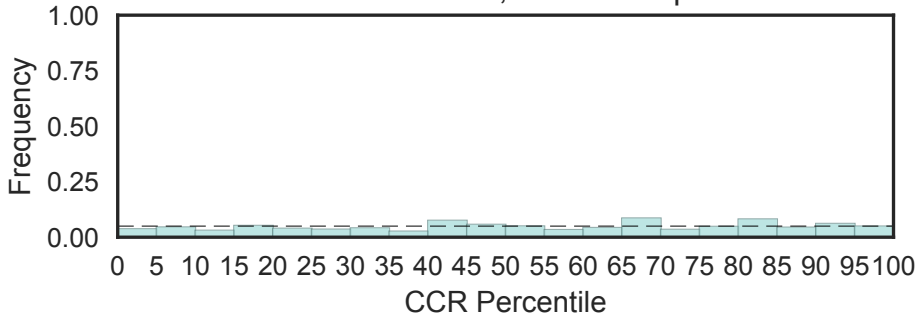



Neuregulin family  
(Neuregulin, N=3)

Fisher's OR: 0.327; Bonferroni p-val: 1

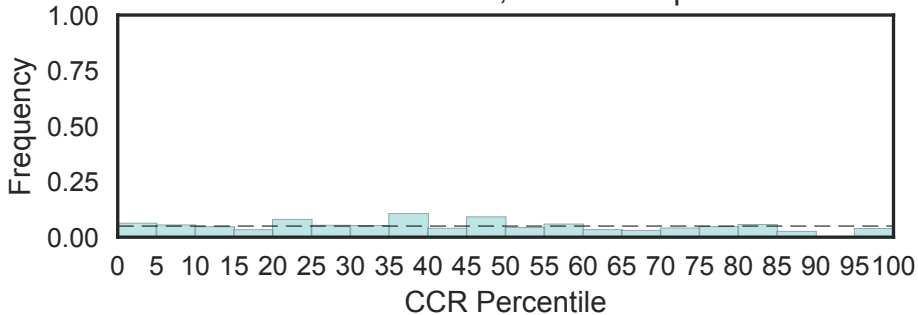

# Neurensin

(Neurensin, N=3)

Fisher's OR: 0; Bonferroni p-val: 1

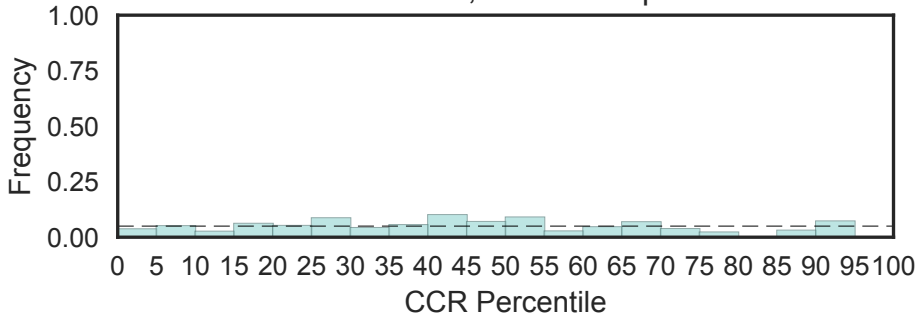

Neurexophilin  
(Neurexophilin, N=9)  
Fisher's OR: 0.622; Bonferroni p-val: 1

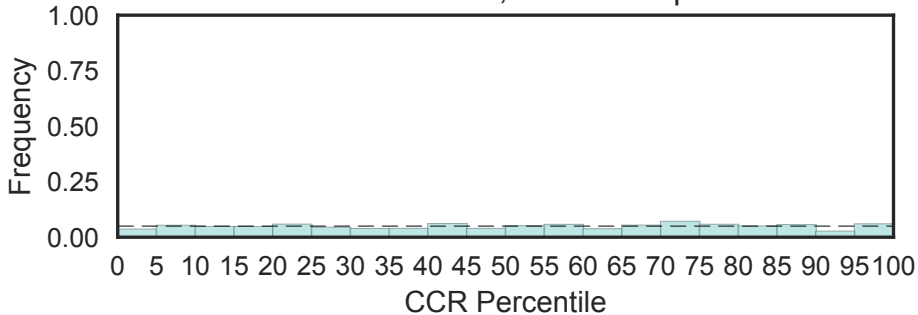

Neuronal helix-loop-helix transcription factor  
(Neuro\_bHLH, N=4)

Fisher's OR: 1.29; Bonferroni p-val: 1

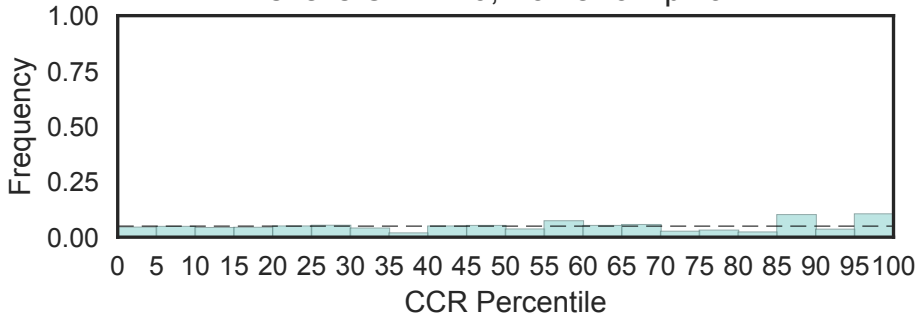

# Neurochondrin (Neurochondrin, N=1)

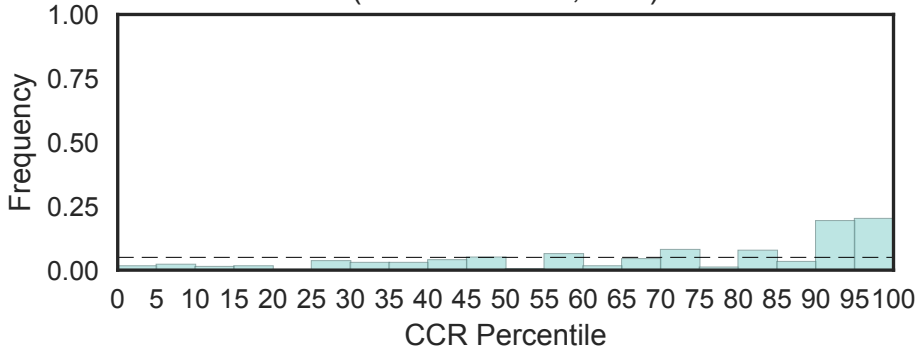

Neurokinin B  
(Neurokinin\_B, N=1)

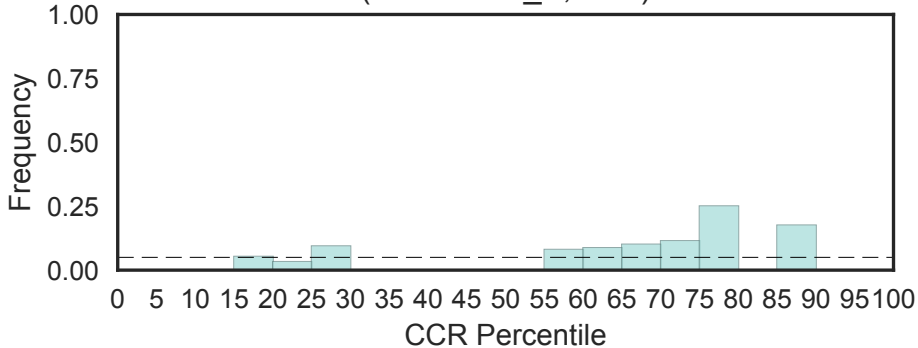

# Neuromodulin (Neuromodulin, N=1)

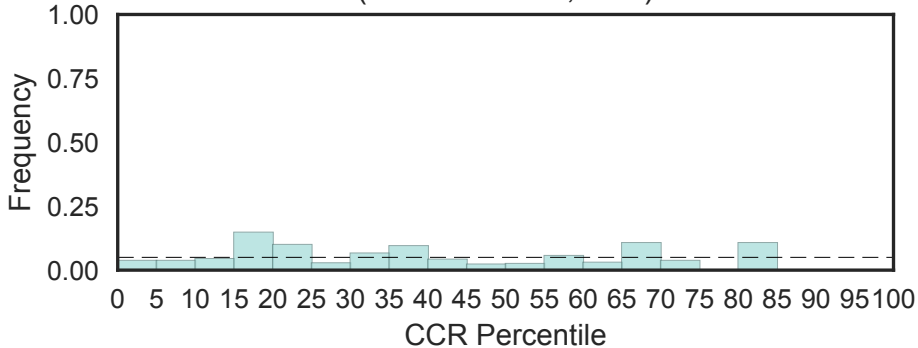

Gap junction protein N-terminal region  
(Neuromodulin\_N, N=1)

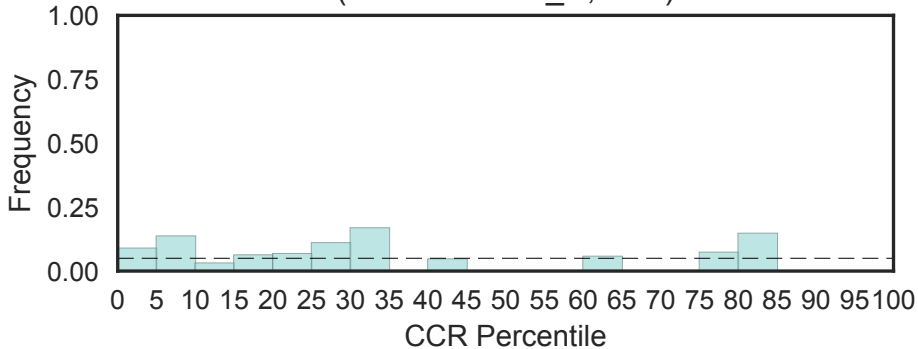



Neuropeptide-like  
(Neuropep\_like, N=1)

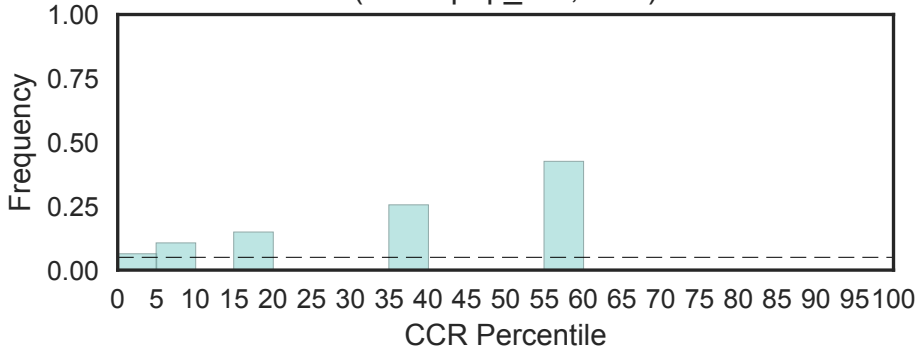

Neuropeptide S precursor protein  
(Neuropeptide\_S, N=1)

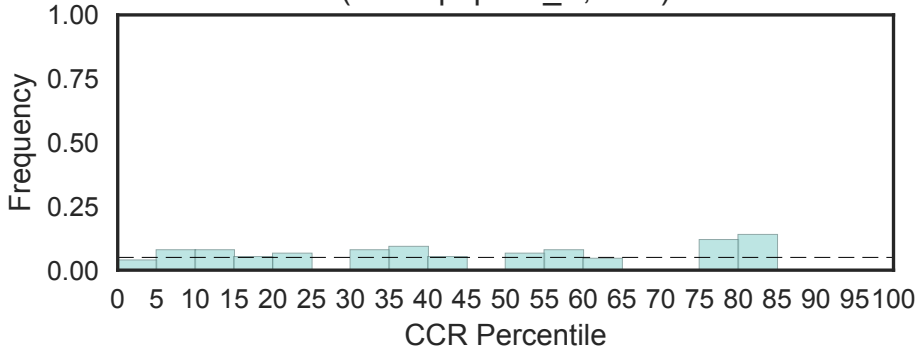

Sorting nexin C terminal  
(Nexin\_C, N=4)

Fisher's OR: 1.31; Bonferroni p-val: 1

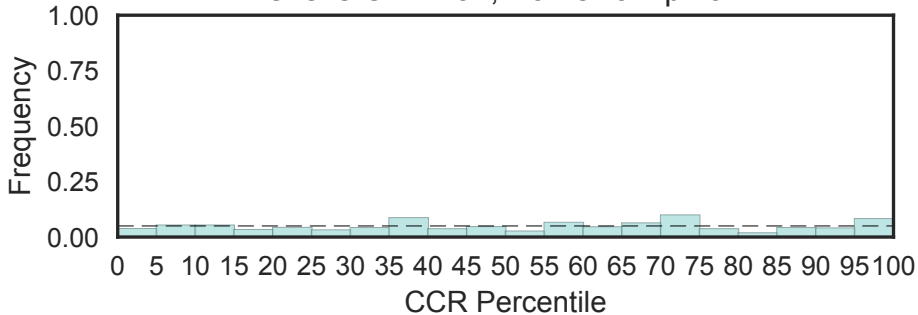

Nuclear factor I protein pre-N-terminus  
(Nfl\_DNAbd\_pre-N, N=4)

Fisher's OR: 4.51; Bonferroni p-val: 1

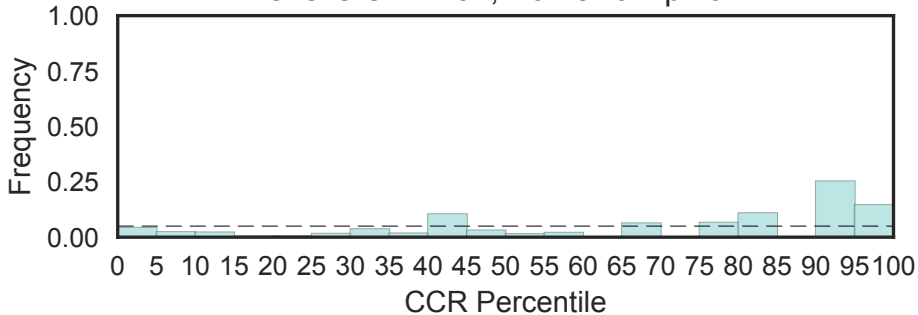

Scaffold protein Nfu/NifU N terminal  
(Nfu\_N, N=1)

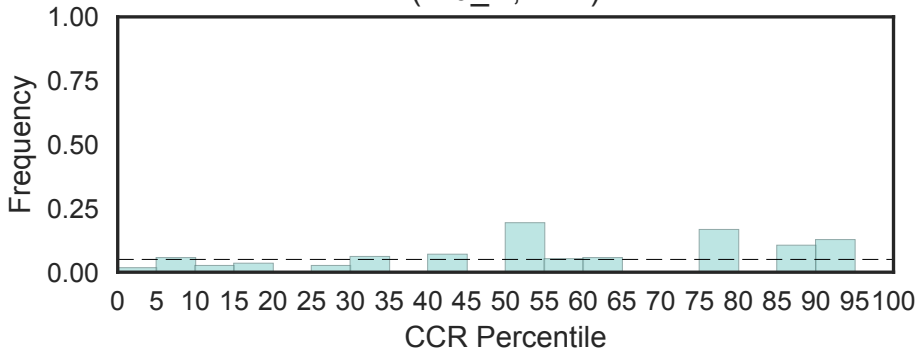

Nup93/Nic96  
(Nic96, N=1)

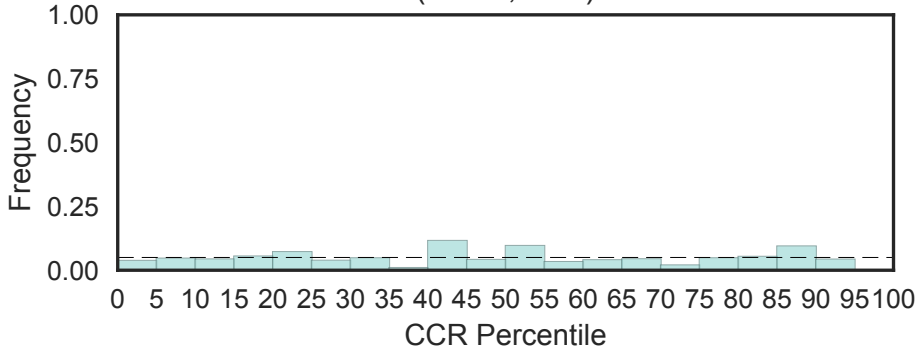

# Nicastrin

(Nicastrin, N=2)

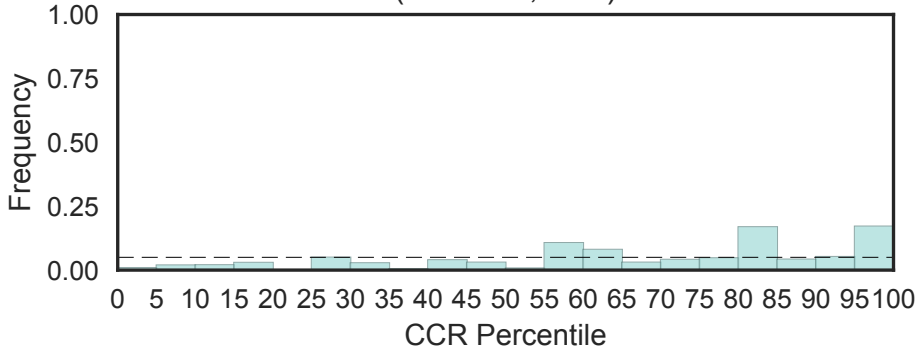

NifU-like domain  
(NifU, N=1)

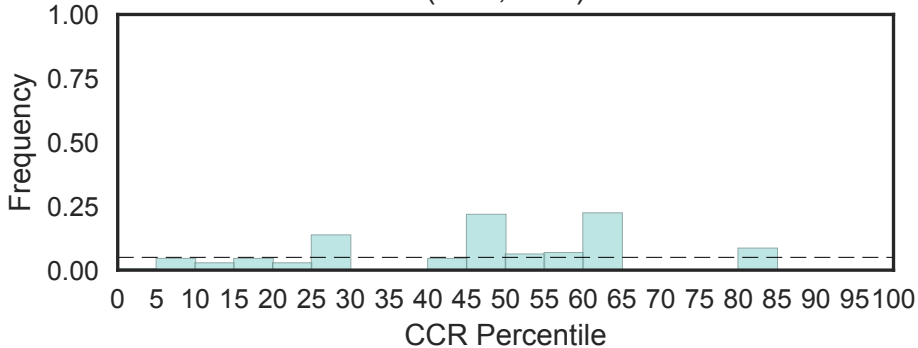



NifU-like N terminal domain  
(NifU\_N, N=1)

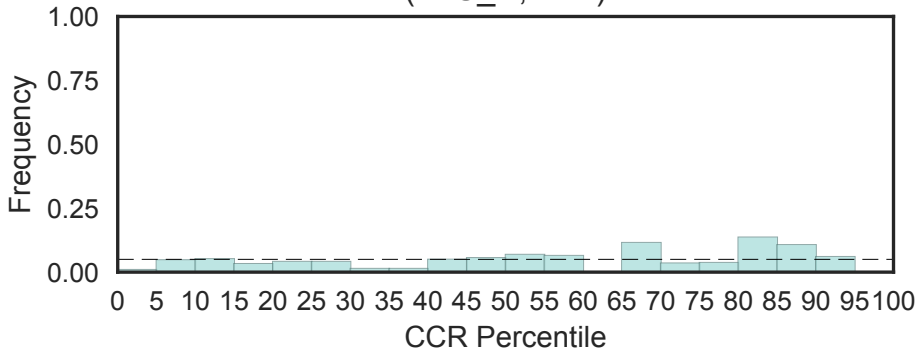

# Ninjurin

(Ninjurin, N=2)

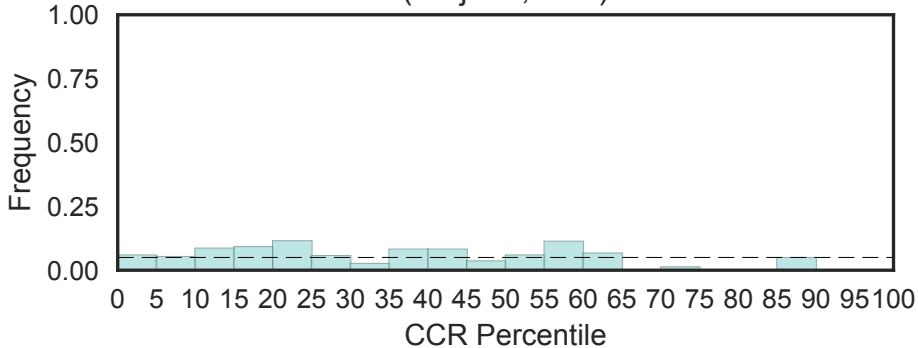

Sister chromatid cohesion C-terminus  
(Nipped-B\_C, N=1)

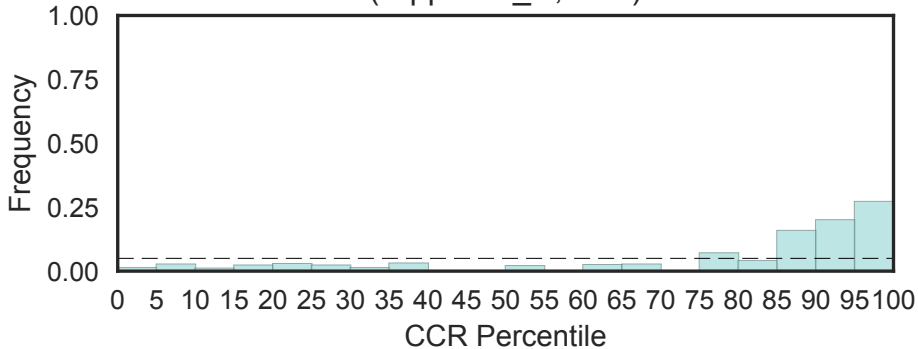

Nitroreductase family  
(Nitroreductase, N=1)

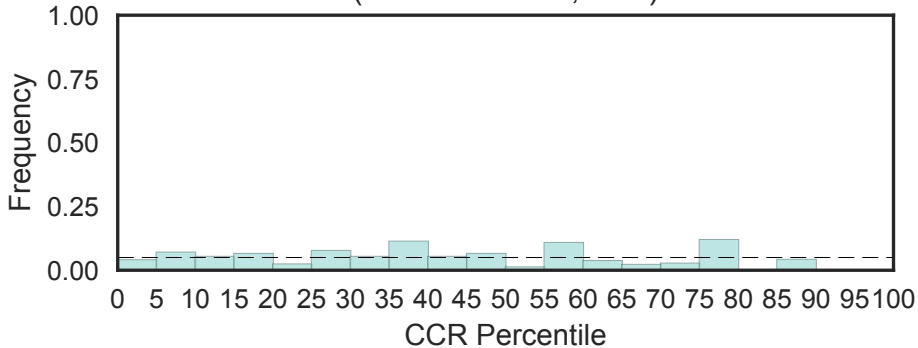

Mjmu-R1-like protein family  
(Njmu-R1, N=1)

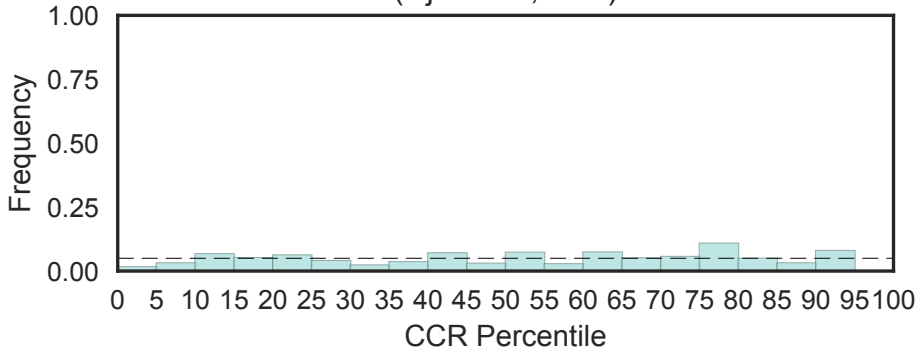

NmrA-like family  
(NmrA, N=7)

Fisher's OR: 0; Bonferroni p-val: 1

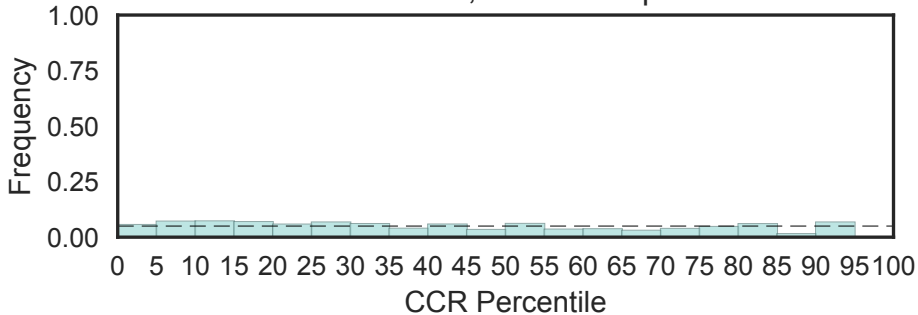

Nnf1

(Nnf1, N=3)

Fisher's OR: 0; Bonferroni p-val: 1

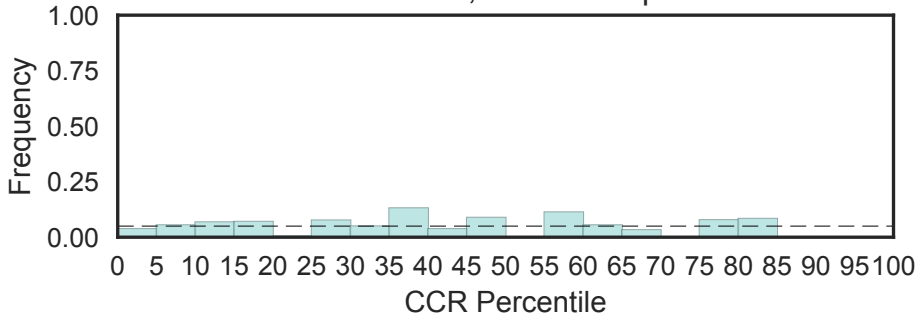

Noc2p family  
(Noc2, N=1)

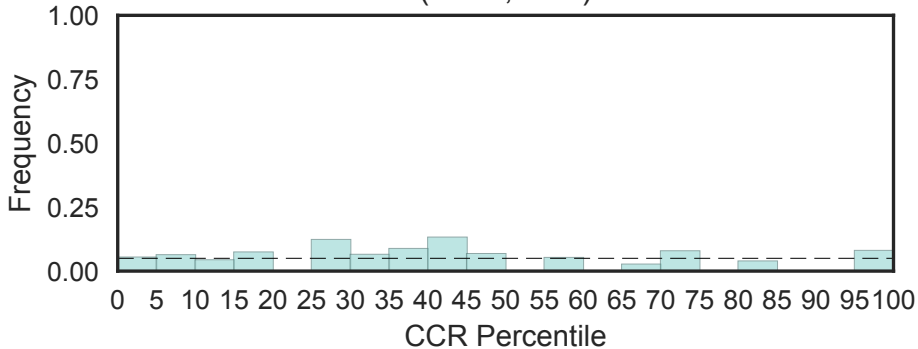



# Nodulation protein S (NodS) (NodS, N=2)

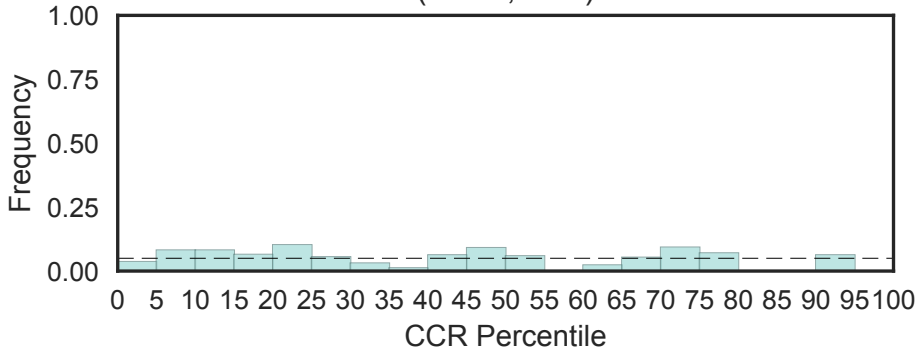

Neurogenesis glycoprotein  
(Noelin-1, N=3)

Fisher's OR: 1.3; Bonferroni p-val: 1

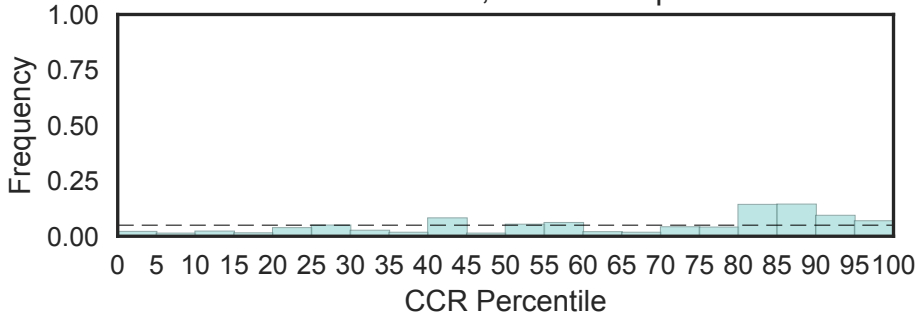

# Noggin (Noggin, N=1)

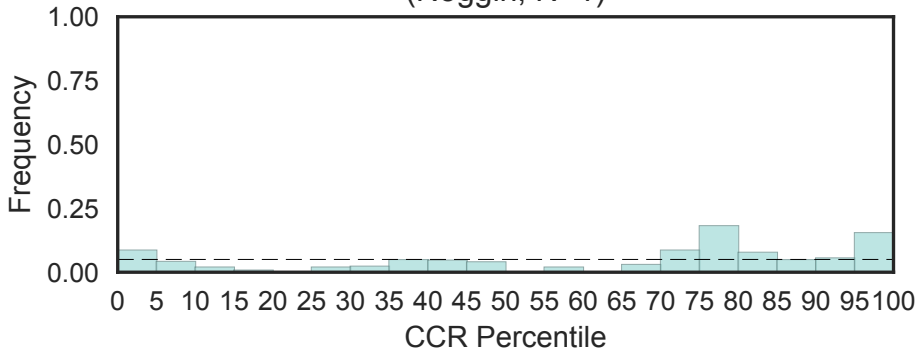

snoRNA binding domain, fibrillarin  
(Nop, N=3)

Fisher's OR: 1.4; Bonferroni p-val: 1

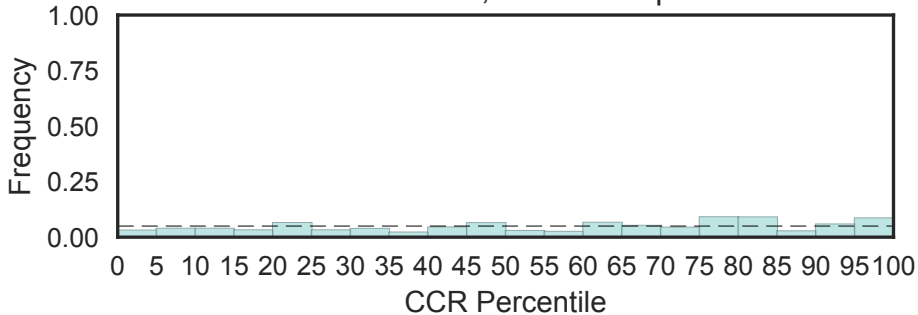

Nucleolar RNA-binding protein, Nop10p family  
(Nop10p, N=1)

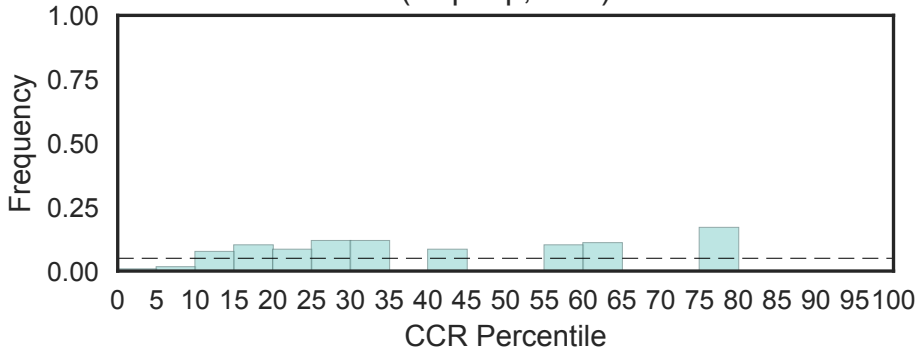

Nop14-like family  
(Nop14, N=1)

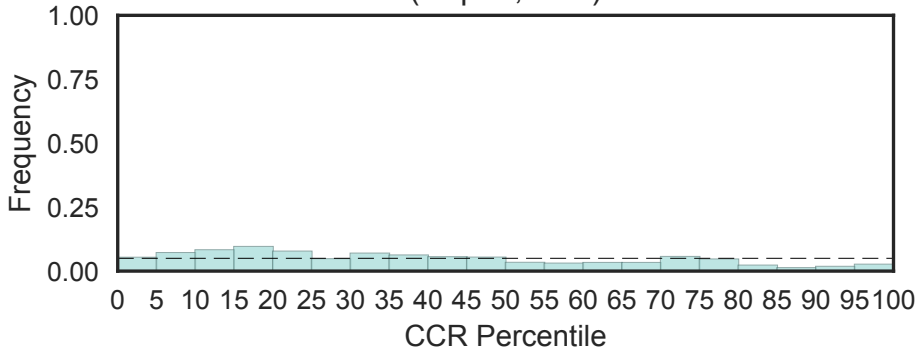

Ribosome biogenesis protein Nop16  
(Nop16, N=3)

Fisher's OR: 0; Bonferroni p-val: 1

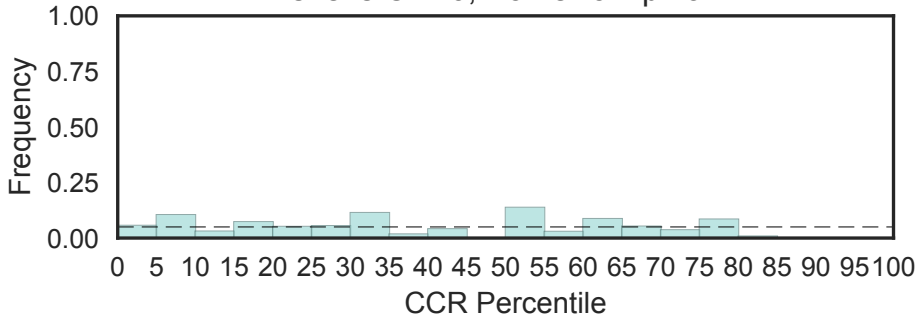

Nucleolar protein 12 (25kDa)  
(Nop25, N=1)

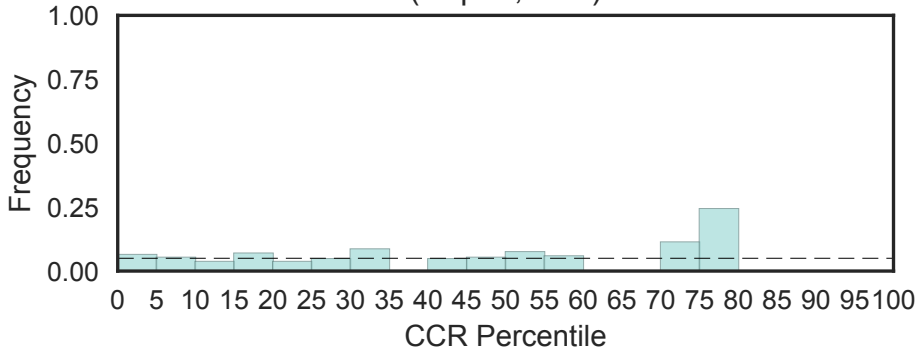



Nucleolar protein, Nop52  
(Nop52, N=2)

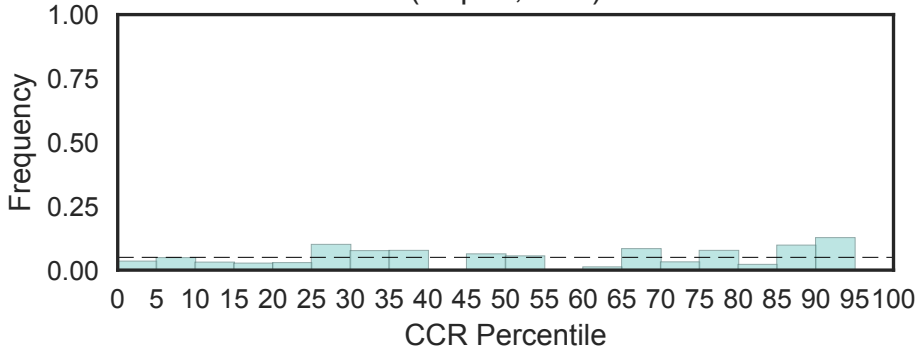

Nop53 (60S ribosomal biogenesis)  
(Nop53, N=1)

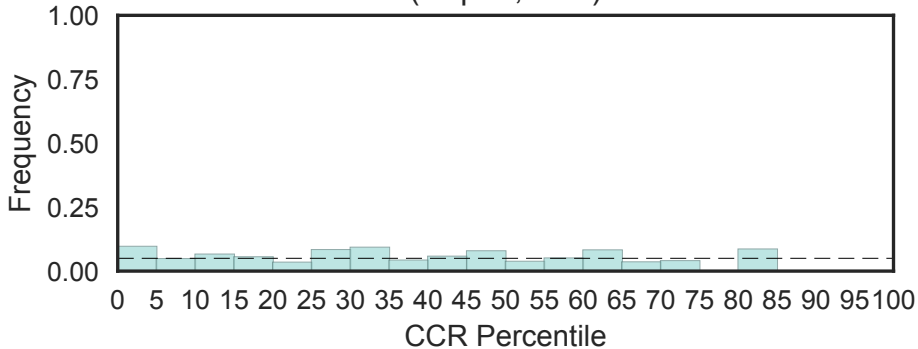

# Nucleolar pre-ribosomal-associated protein 1 (NopRA1, N=1)

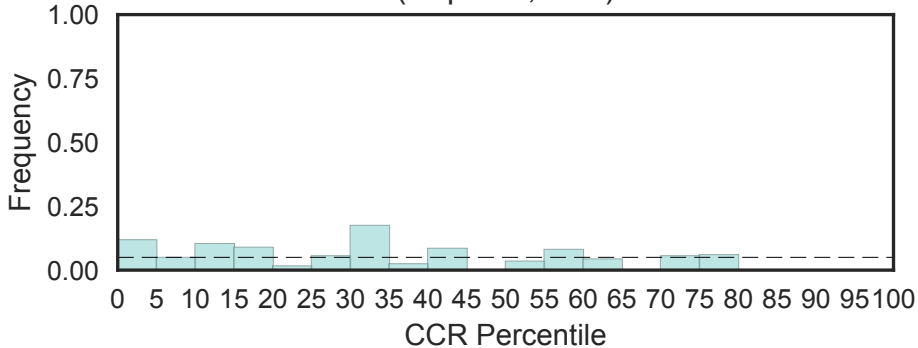

Novel Ras effector 1 C-terminal SARAH (Sav/Rassf/Hpo) domain  
(Nore1-SARAH, N=6)

Fisher's OR: 0; Bonferroni p-val: 1

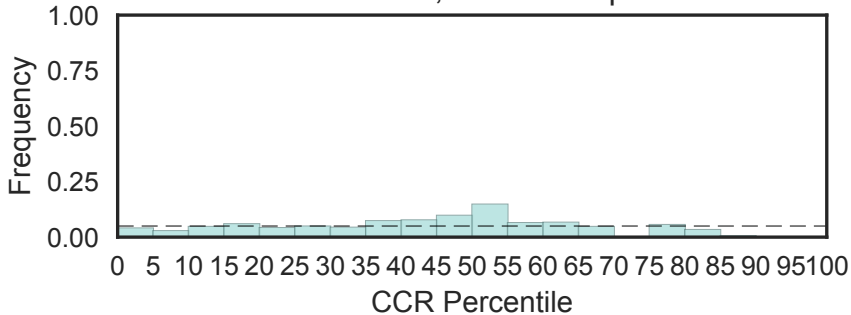

Periplasmic copper-binding protein (NosD)  
(NosD, N=7)

Fisher's OR: 2.83; Bonferroni p-val: 1

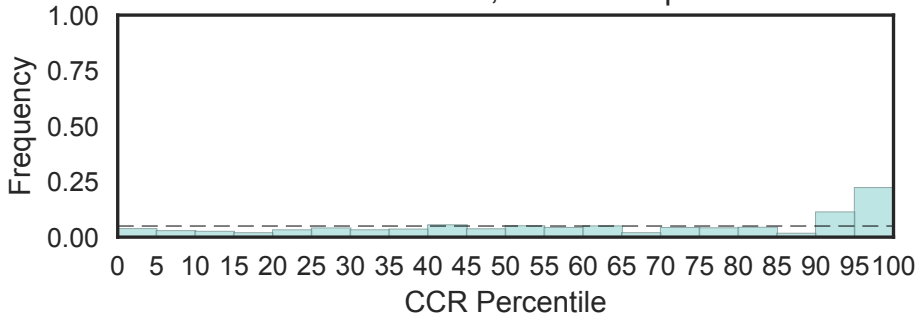

# CCR4-Not complex component, Not1 (Not1, N=1)

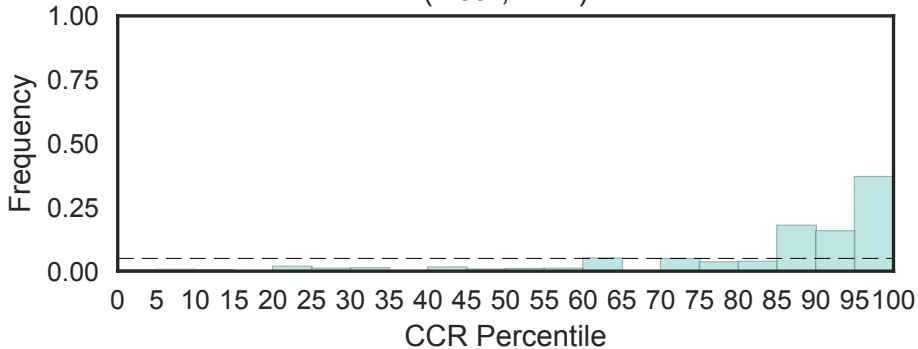

Not1 N-terminal domain, CCR4-Not complex component  
(Not3, N=1)

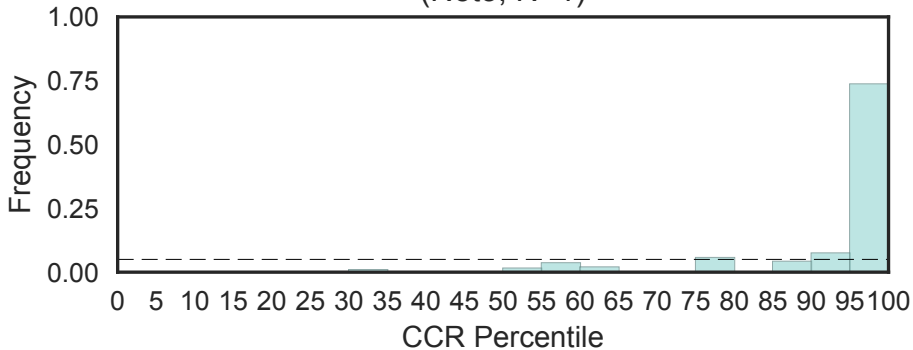

LNR domain  
(Notch, N=15)

Fisher's OR: 0; Bonferroni p-val: 1

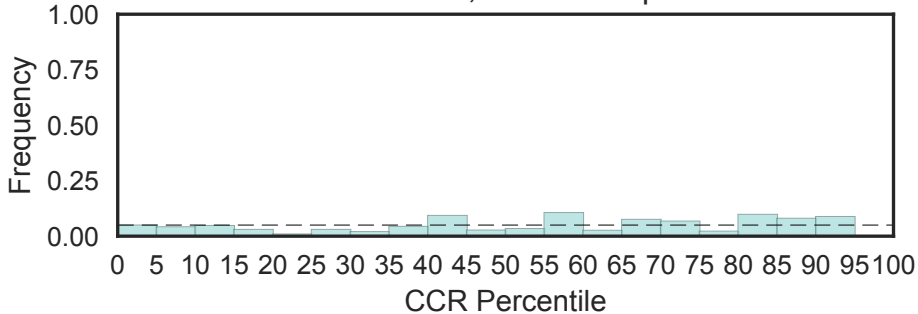



# Ribosome 60S biogenesis N-terminal (Npa1, N=1)

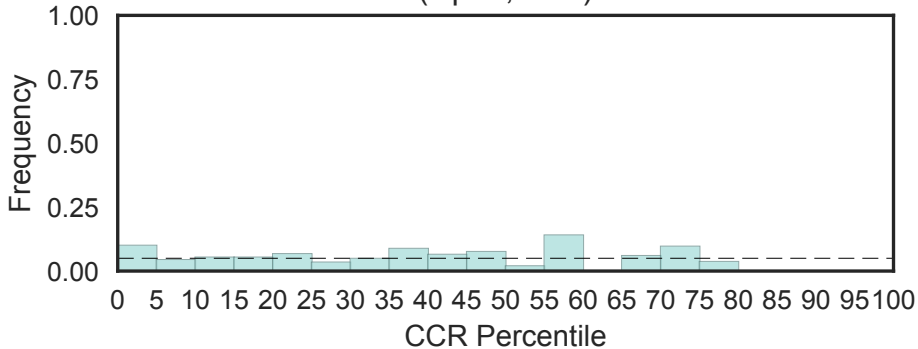

# Natural resistance-associated macrophage protein (Nramp, N=2)

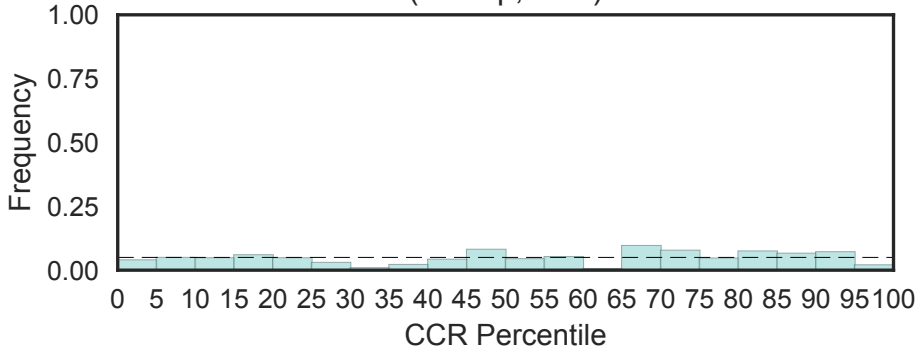

# Nrap protein domain 1 (Nrap, N=1)

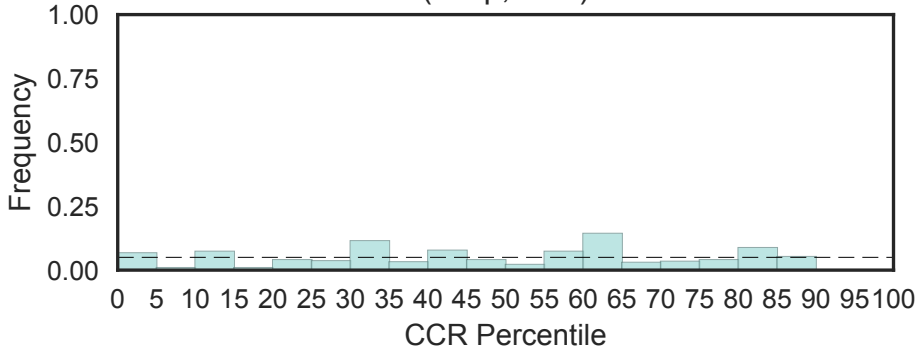

Nrap protein PAP/OAS-like domain  
(Nrap\_D2, N=1)

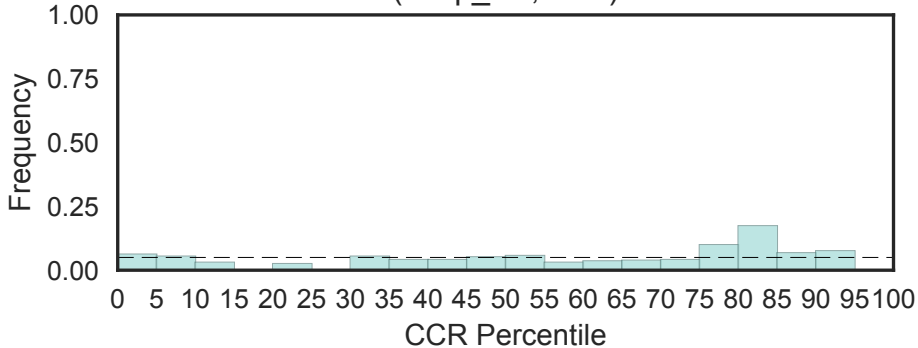

Nrap protein domain 3  
(Nrap\_D3, N=1)

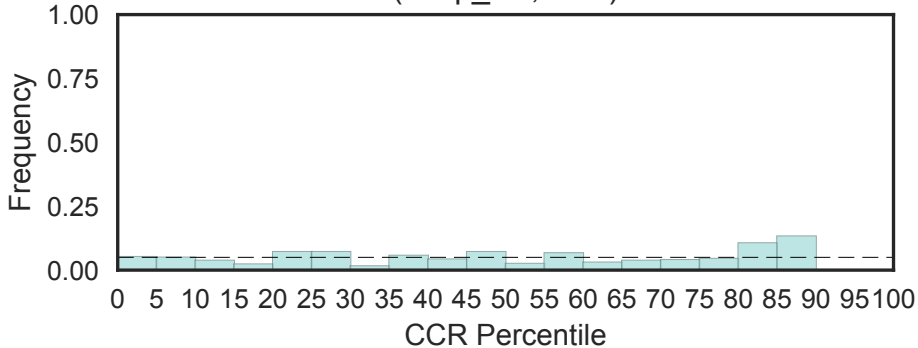

Nrap protein nucleotidyltransferase domain 4  
(Nrap\_D4, N=1)

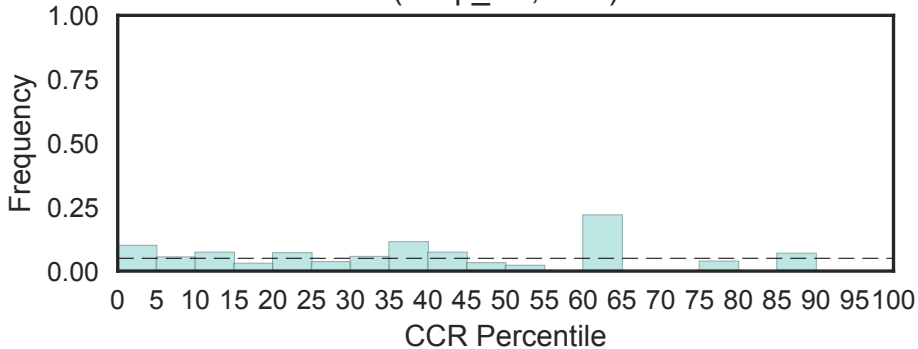

Nrap protein PAP/OAS1-like domain 5  
(Nrap\_D5, N=1)

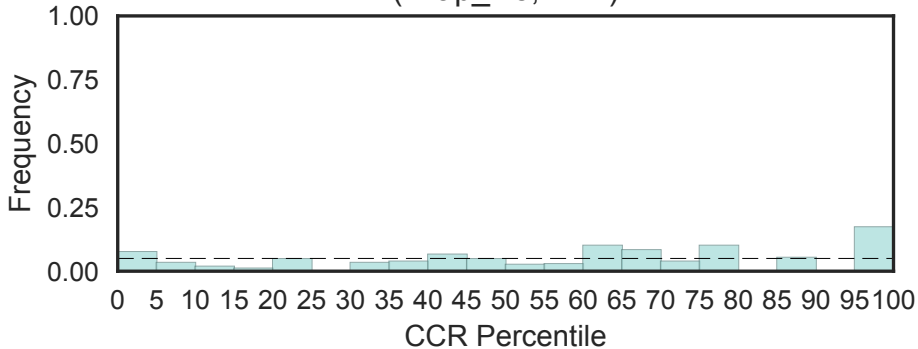

Nrap protein domain 6  
(Nrap\_D6, N=1)

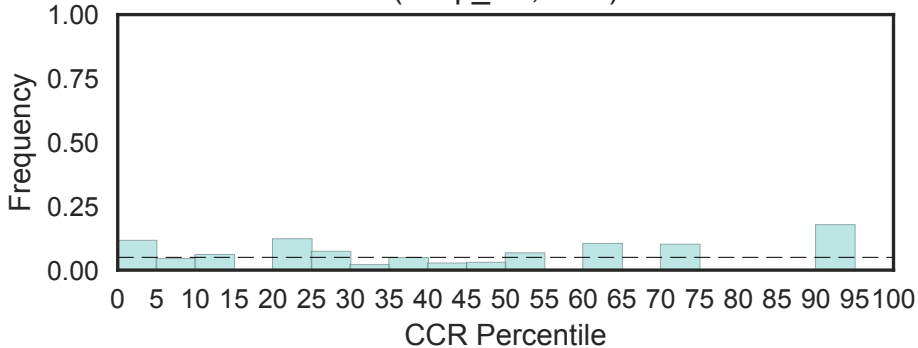



# NLS-binding and DNA-binding and dimerisation domains of Nrf1 (Nrf1\_DNA-bind, N=1)

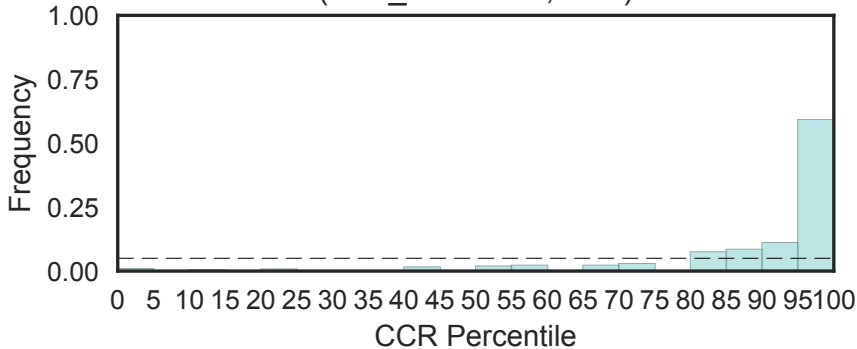

Nrf1 activator activation site binding domain  
(Nrf1\_activ\_bdg, N=1)

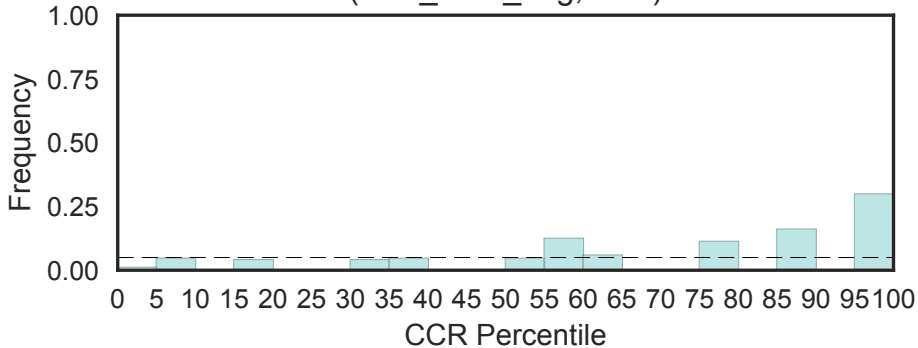

Binding domain of Nse4/EID3 to Nse3-MAGE  
(Nse4-Nse3\_bdg, N=2)

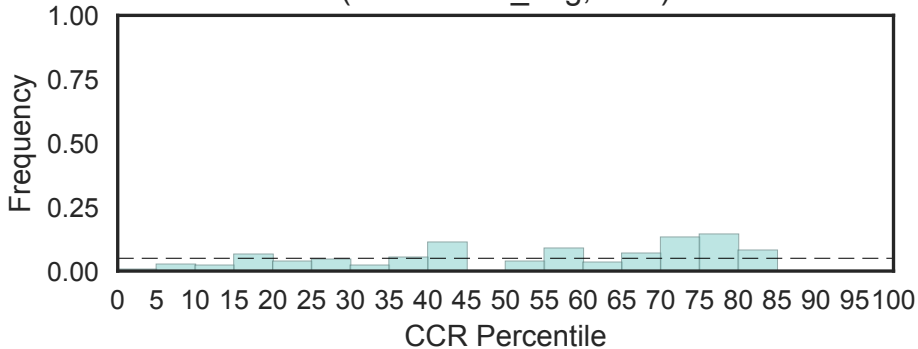

Nse4 C-terminal  
(Nse4\_C, N=2)

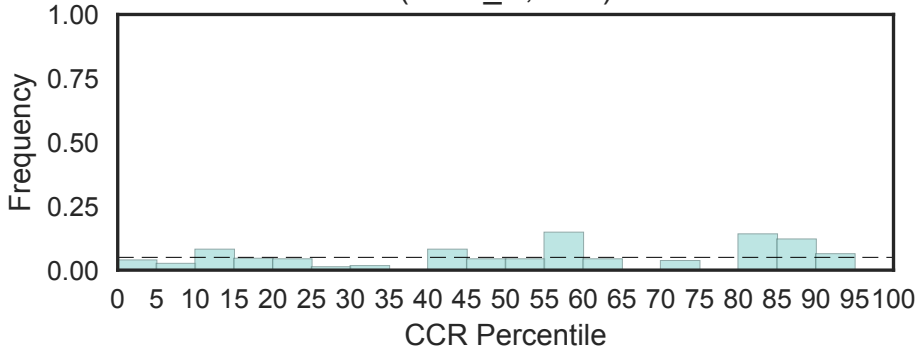

Nsp1-like C-terminal region  
(Nsp1\_C, N=1)

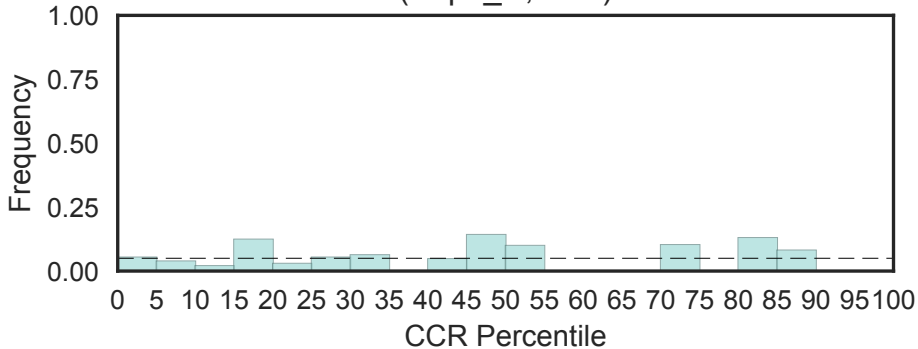

Agrin NtA domain  
(NtA, N=1)

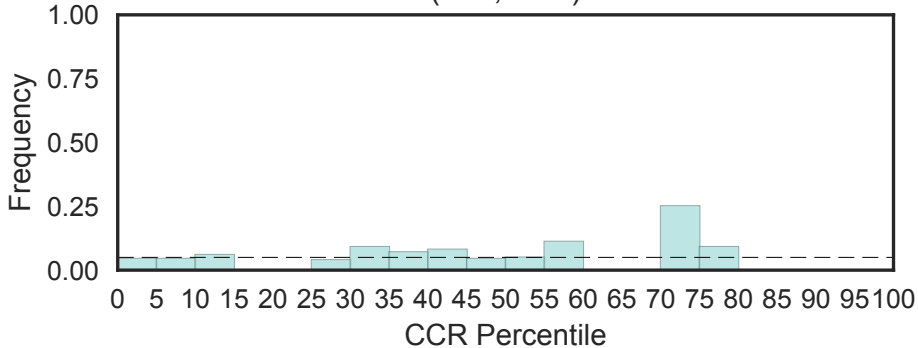

N-terminal barrel of NtMGAM and CtMGAM, maltase-glucoamylase  
(NtCtMGAM\_N, N=6)

Fisher's OR: 0; Bonferroni p-val: 1

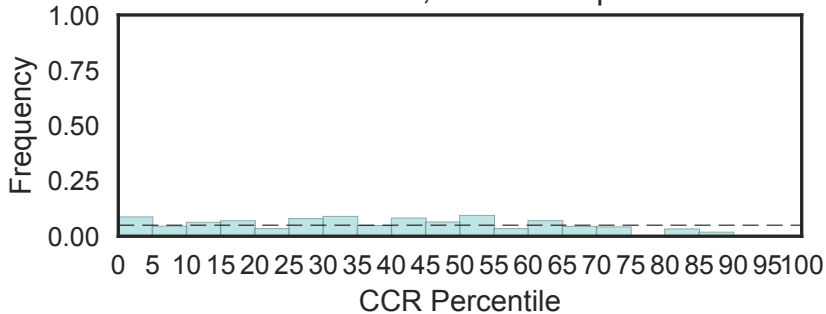

N-terminal glutamine amidase  
(Nt\_Gln\_amidase, N=1)

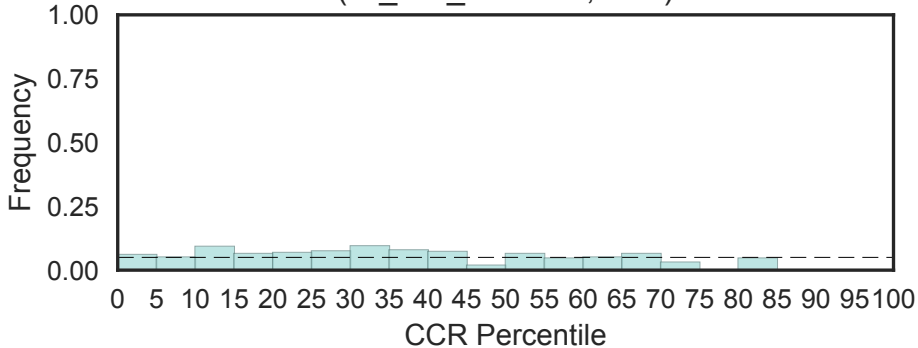



# Histone acetyltransferase subunit NuA4 (NuA4, N=1)

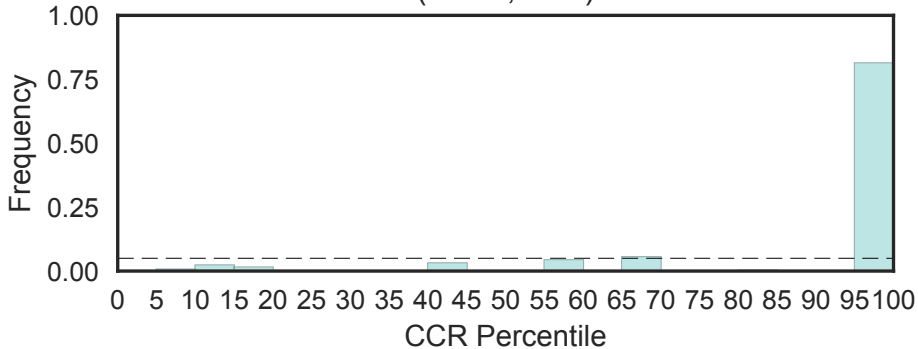

Nuclear distribution C domain  
(NuDC, N=1)

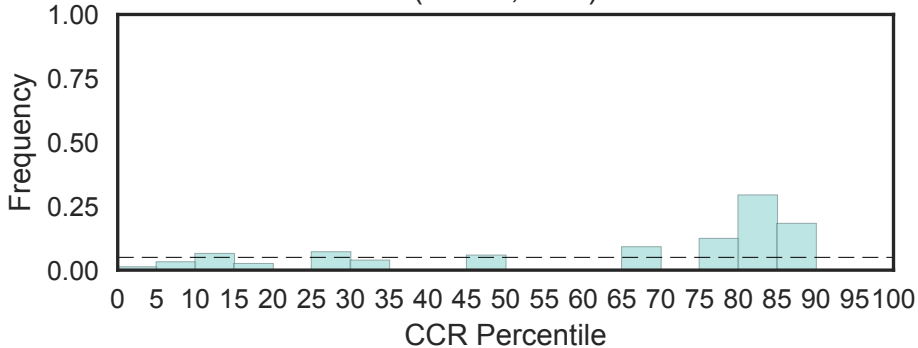

Nucleoside H<sup>+</sup> symporter  
(Nuc\_H\_symport, N=1)

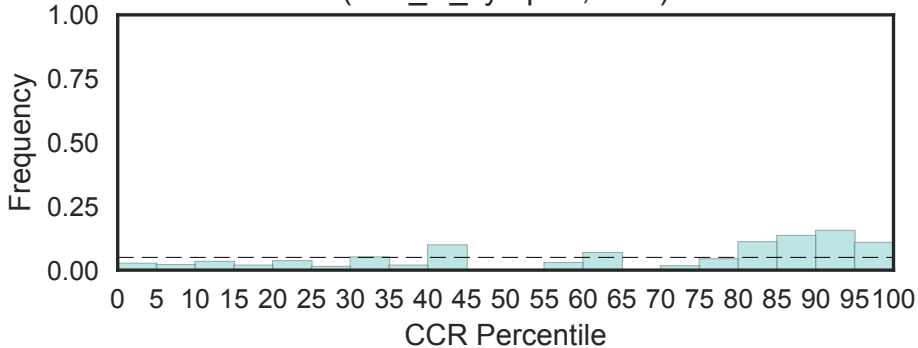

Nucleoside 2-deoxyribosyltransferase  
(Nuc\_deoxyrib\_tr, N=1)

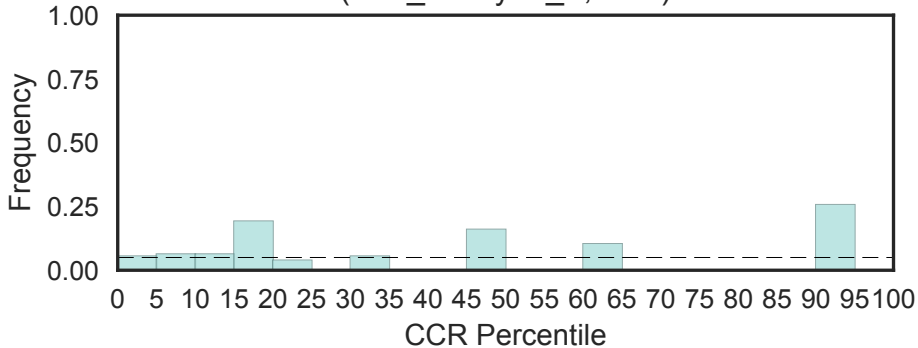

Nuclear receptor coactivator  
(Nuc\_rec\_co-act, N=3)  
Fisher's OR: 7.46; Bonferroni p-val: 1

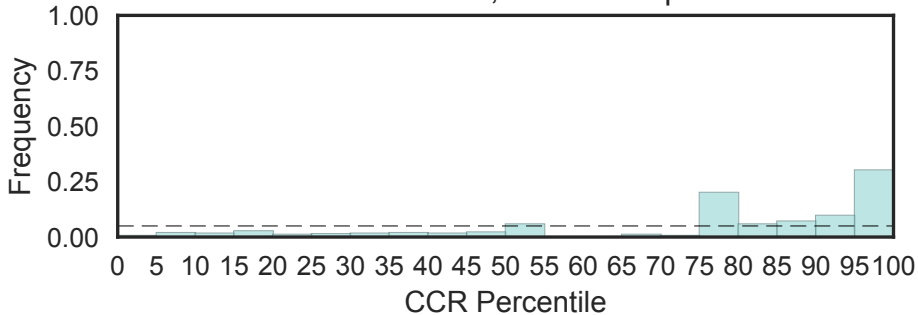

Nuclear/hormone receptor activator site AF-1  
(Nuc\_recep-AF1, N=2)

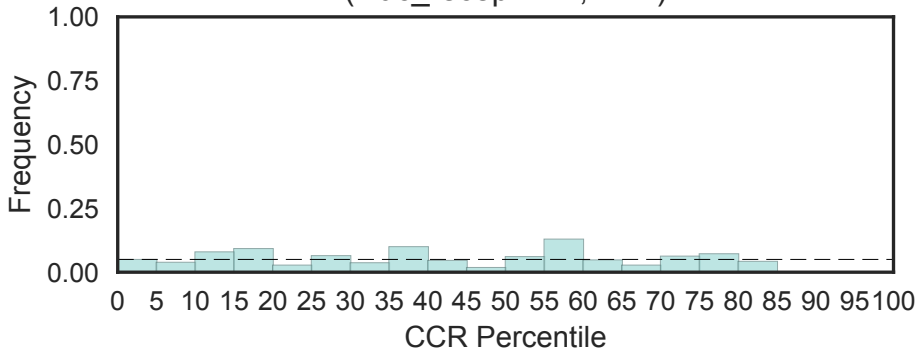

Nucleotide-sugar transporter  
(Nuc\_sug\_transp, N=5)  
Fisher's OR: 0; Bonferroni p-val: 1

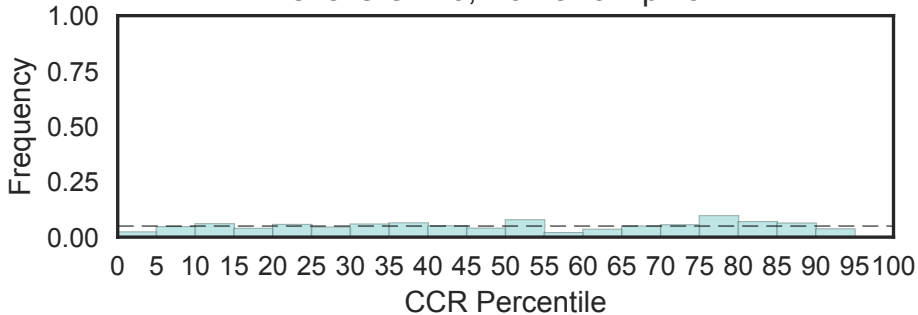

Putative nucleic acid-binding region  
(Nucleic\_acid\_bd, N=1)

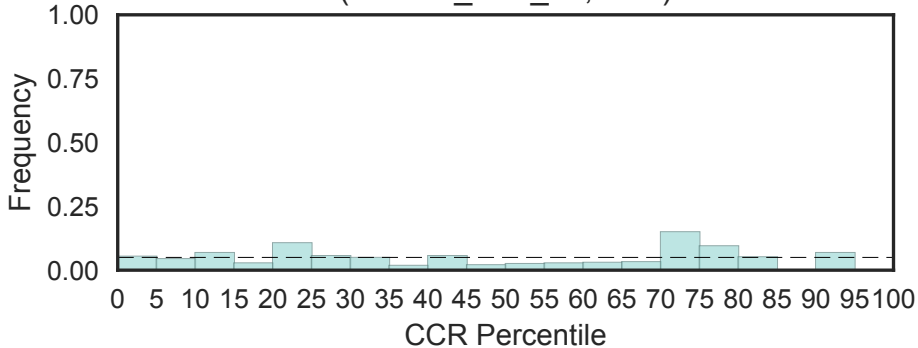



Nucleolin binding domain  
(Nucleolin\_bd, N=1)

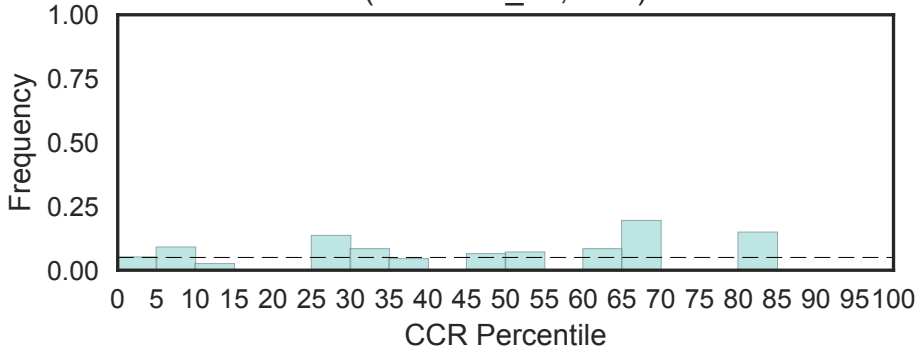

Nucleoplasmin/nucleophosmin domain  
(Nucleoplasmin, N=3)

Fisher's OR: 3.49; Bonferroni p-val: 1

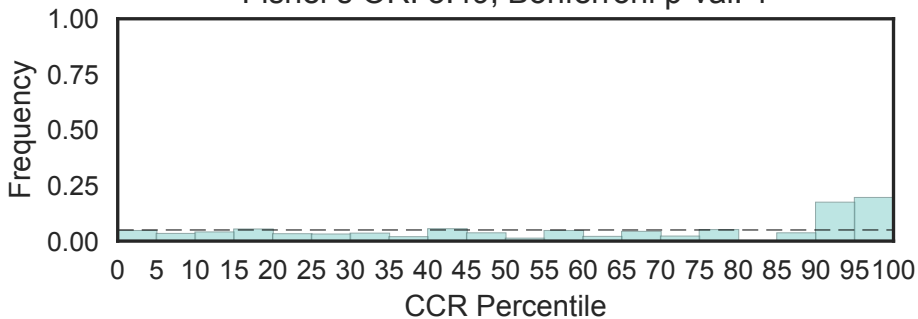

Nup85 Nucleoporin  
(Nucleopor\_Nup85, N=1)

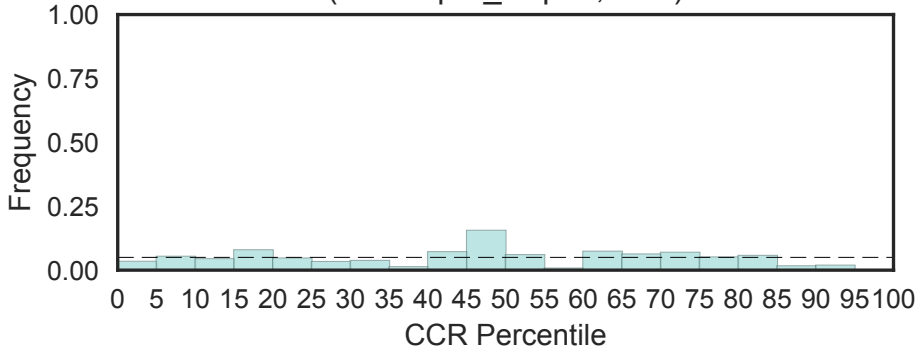

# Nucleoporin autopeptidase (Nucleoporin2, N=1)

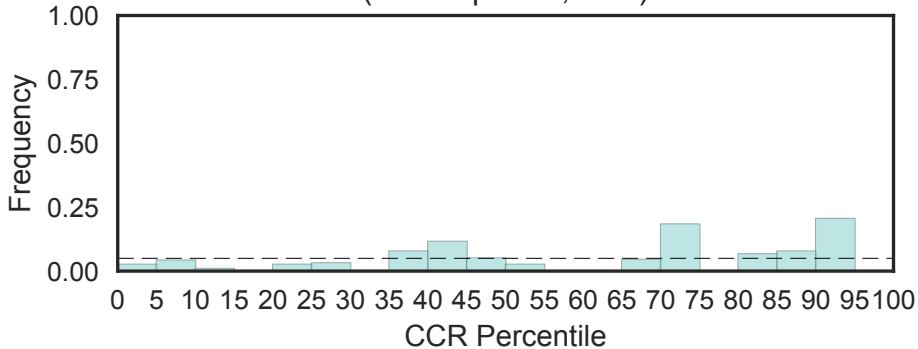

Non-repetitive/WGA-negative nucleoporin C-terminal  
(Nucleoporin\_C, N=2)

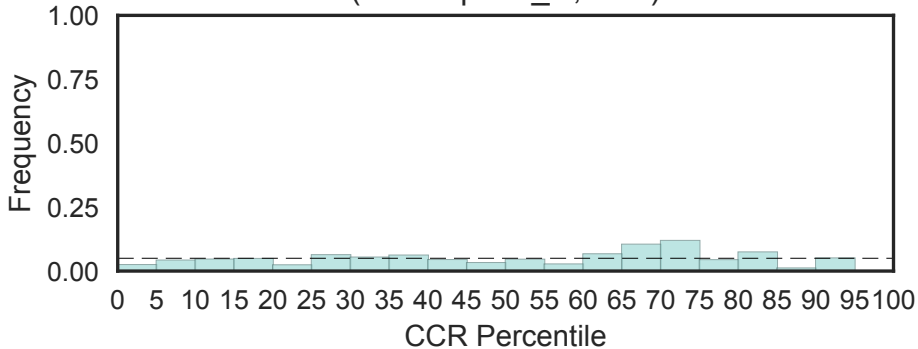

Nucleoporin FG repeat region  
(Nucleoporin\_FG, N=7)  
Fisher's OR: 0; Bonferroni p-val: 1

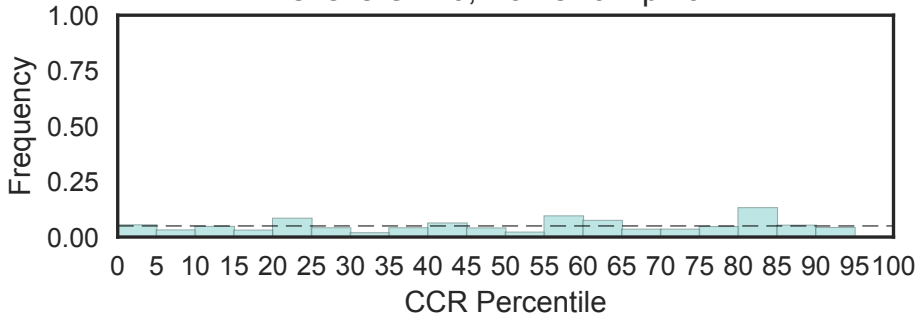

Nucleoporin FG repeated region  
(Nucleoporin\_FG2, N=1)

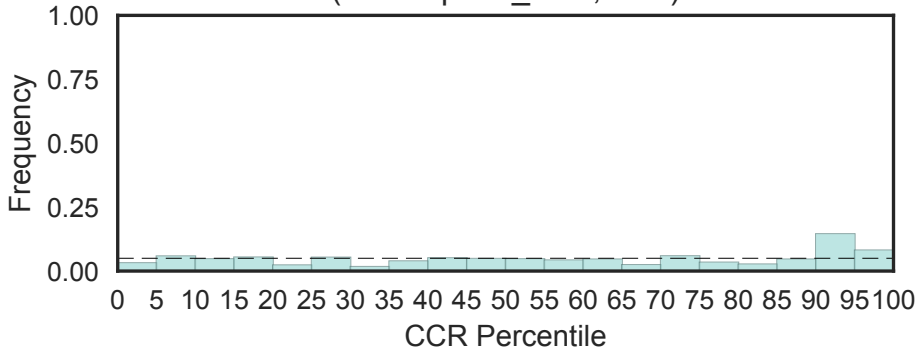

Nup133 N terminal like  
(Nucleoporin\_N, N=1)

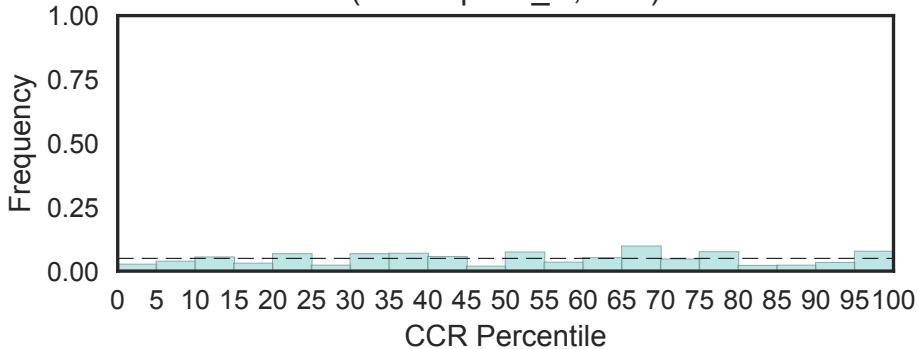



Na<sup>+</sup> dependent nucleoside transporter C-terminus  
(Nucleos\_tra2\_C, N=3)

Fisher's OR: 0; Bonferroni p-val: 1

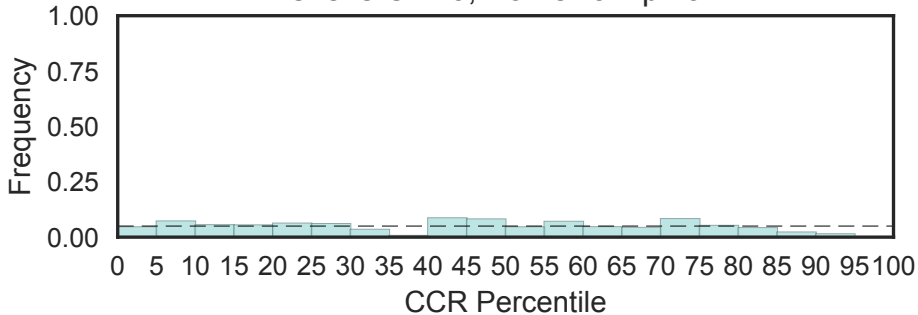

Na<sup>+</sup> dependent nucleoside transporter N-terminus  
(Nucleos\_tra2\_N, N=3)

Fisher's OR: 0; Bonferroni p-val: 1

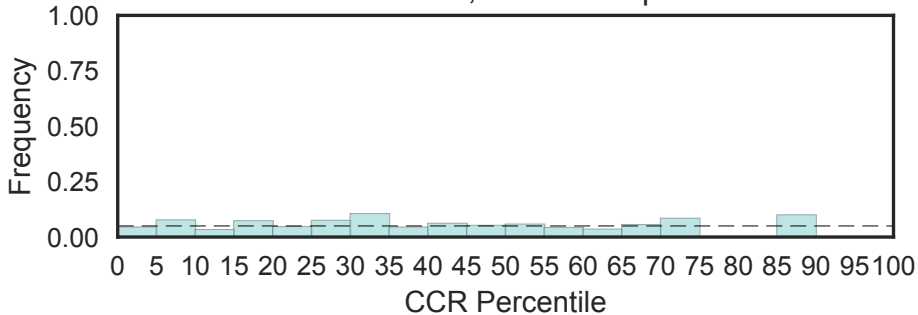

Nucleoside transporter  
(Nucleoside\_tran, N=5)  
Fisher's OR: 0; Bonferroni p-val: 1

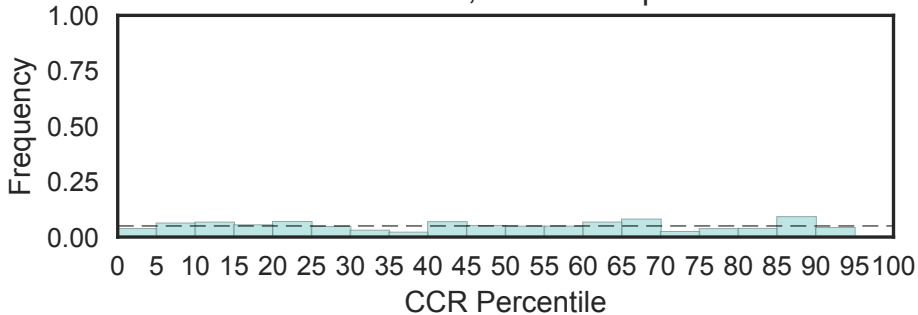

N-terminal conserved domain of Nudc.  
(Nudc\_N, N=2)

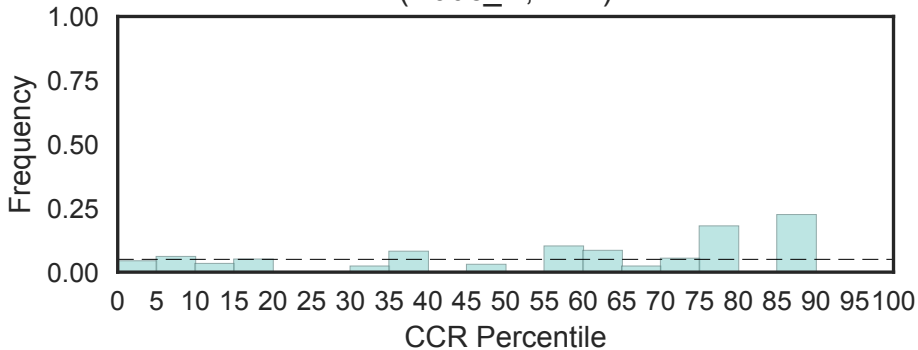

Nuf2 family  
(Nuf2, N=1)

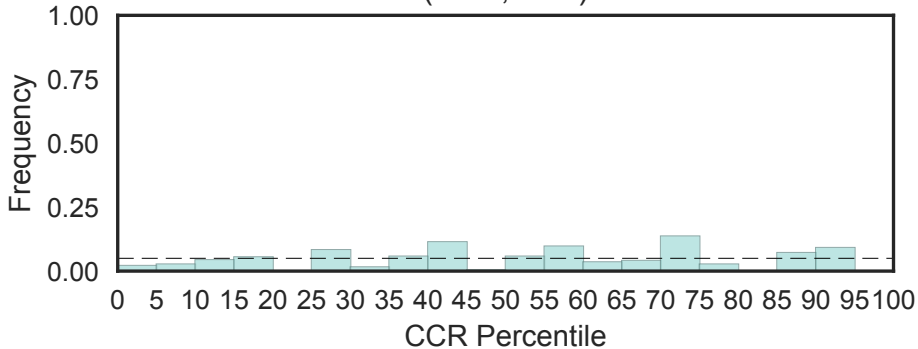

NUMB domain  
(NumbF, N=2)

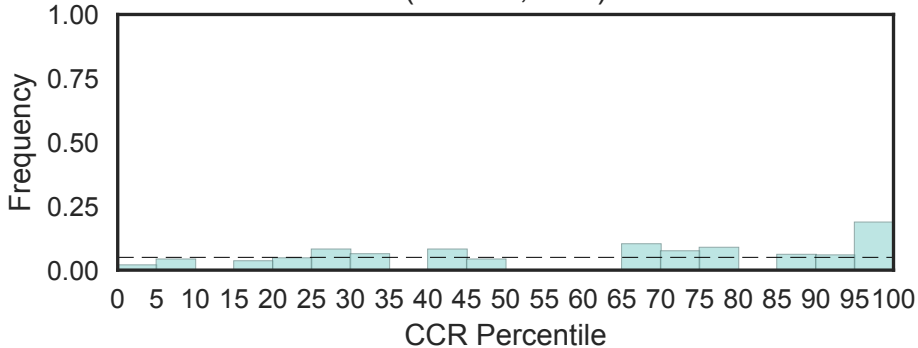

# Nucleoporin Nup153-like (Nup153, N=1)

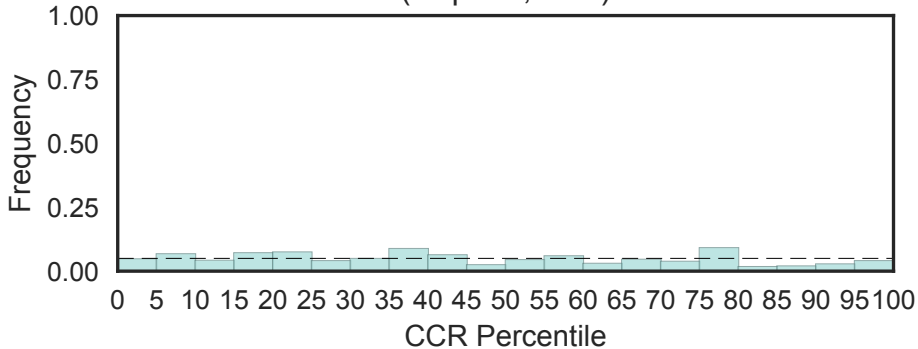

# Nucleoporin Nup120/160 (Nup160, N=1)

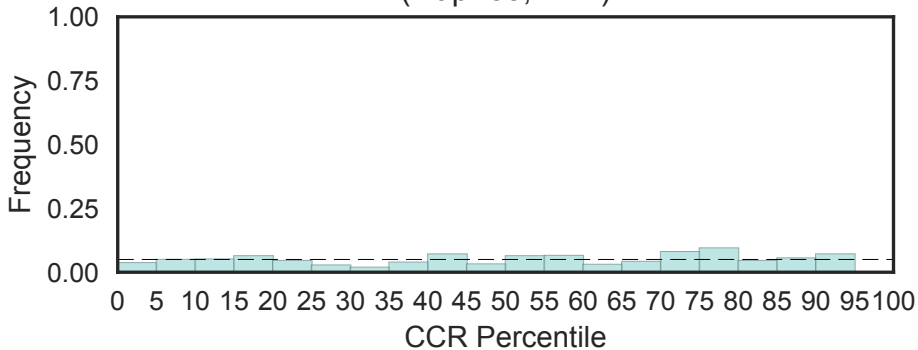



# Nucleoporin subcomplex protein binding to Pom34 (Nup188, N=2)

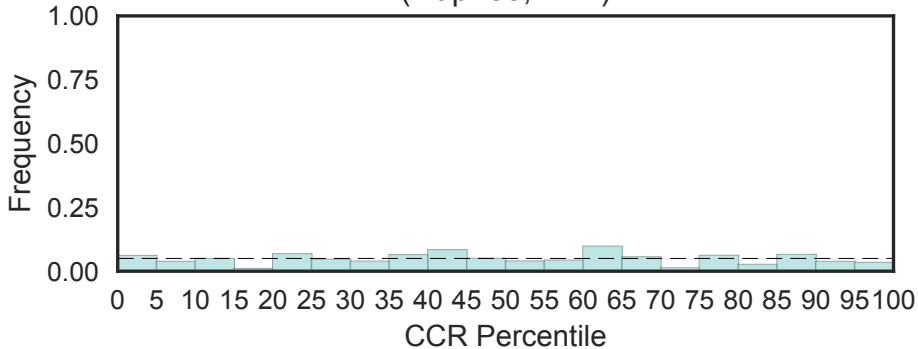

Nuclear pore complex scaffold, nucleoporins 186/192/205  
(Nup192, N=1)

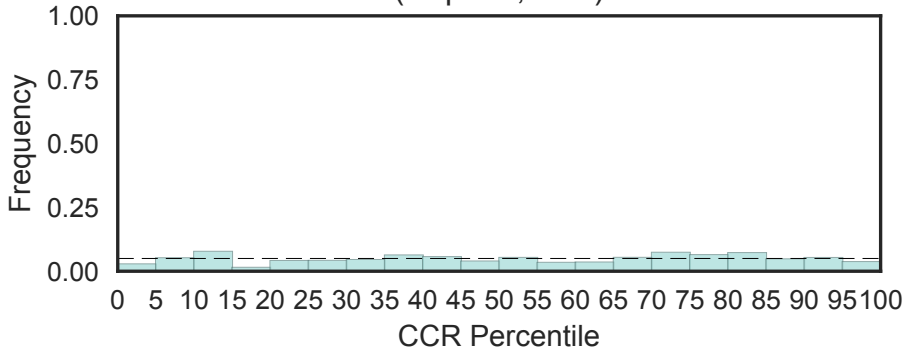

Nup53/35/40-type RNA recognition motif  
(Nup35\_RRM, N=1)

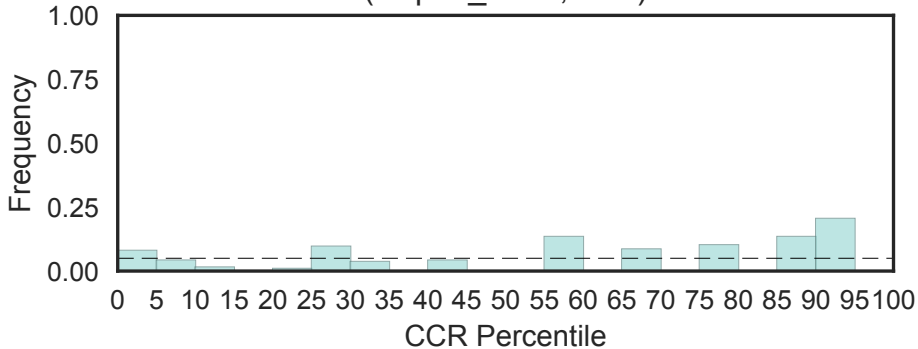

Nup53/35/40-type RNA recognition motif  
(Nup35\_RRM\_2, N=1)

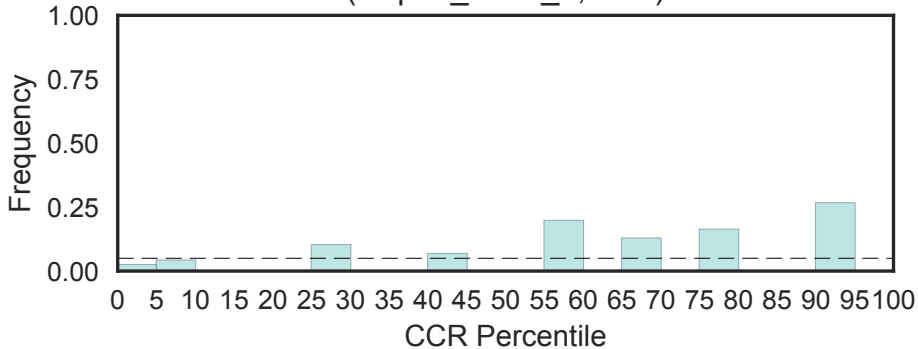

Nucleoporin complex subunit 54  
(Nup54, N=1)

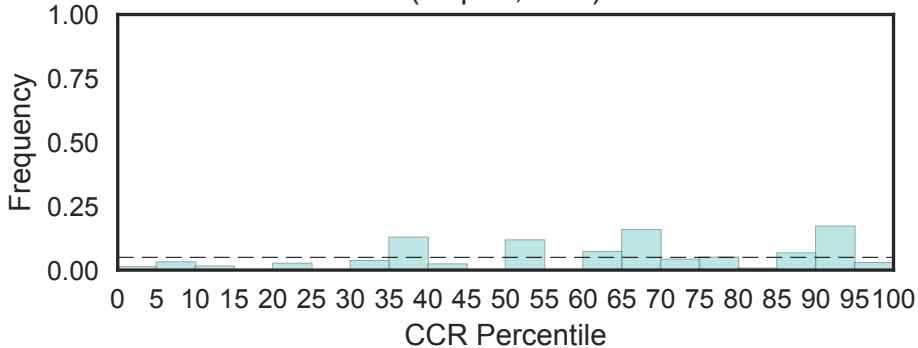

Nuclear pore protein 84 / 107  
(Nup84\_Nup100, N=1)

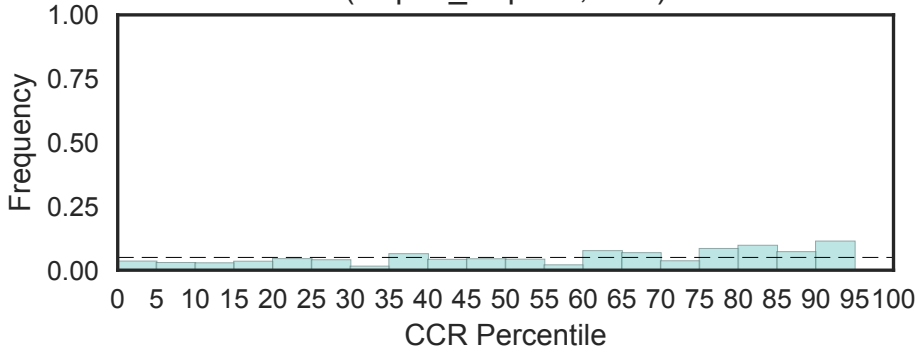

# Nuclear pore component (Nup88, N=1)

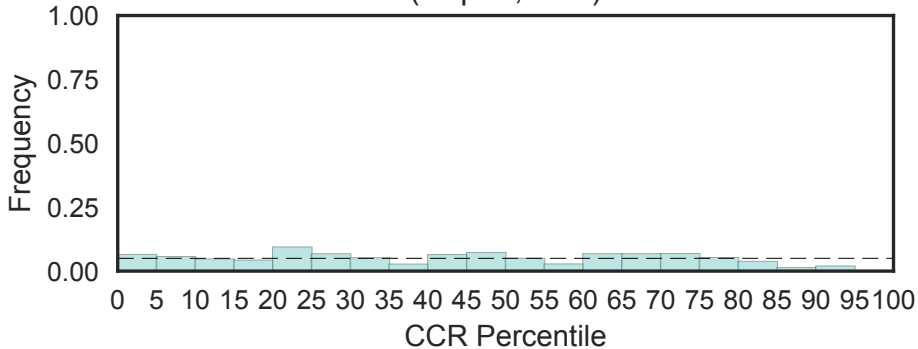

Nuclear protein 96  
(Nup96, N=1)

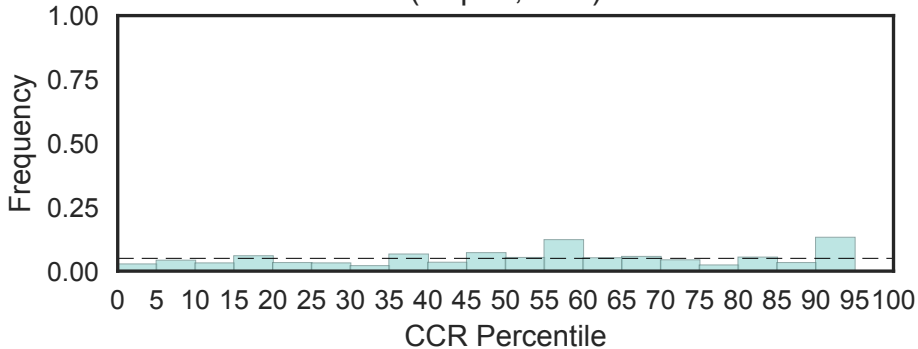



# Nucleoporin homology of Germinal-centre associated nuclear protein (NupH\_GANP, N=1)

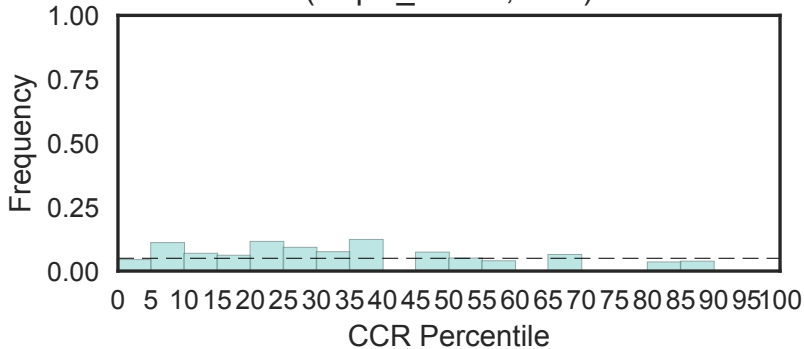

Retro-transposon transporting motif  
(Nup\_retrotrp\_bd, N=1)

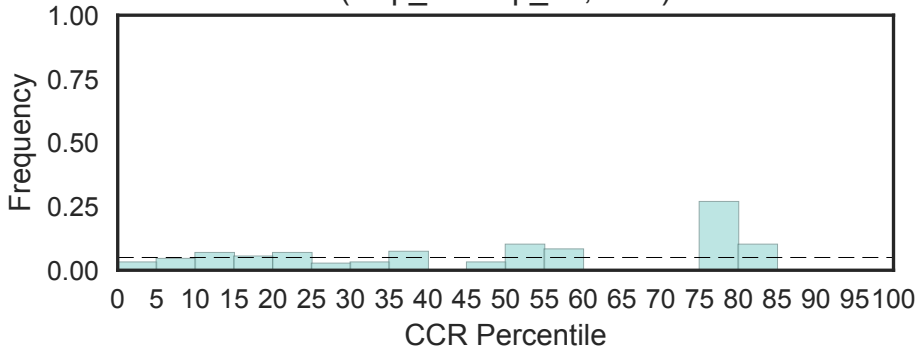

GDP-fucose protein O-fucosyltransferase  
(O-FucT, N=3)

Fisher's OR: 0.702; Bonferroni p-val: 1

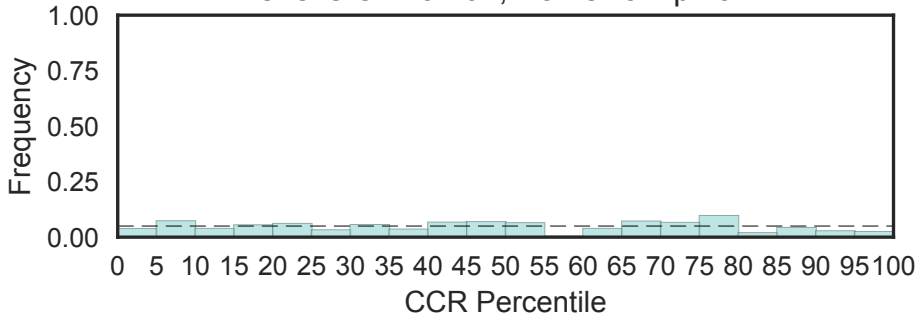

Transcriptional regulator, Out at first  
(OAF, N=1)

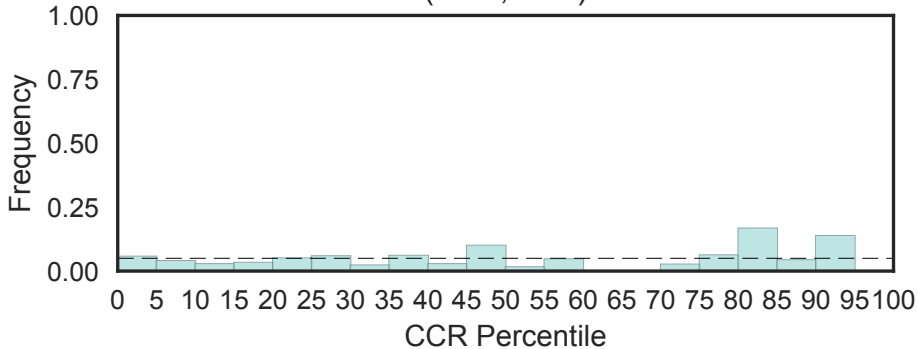

OAR domain  
(OAR, N=13)

Fisher's OR: 1.4; Bonferroni p-val: 1

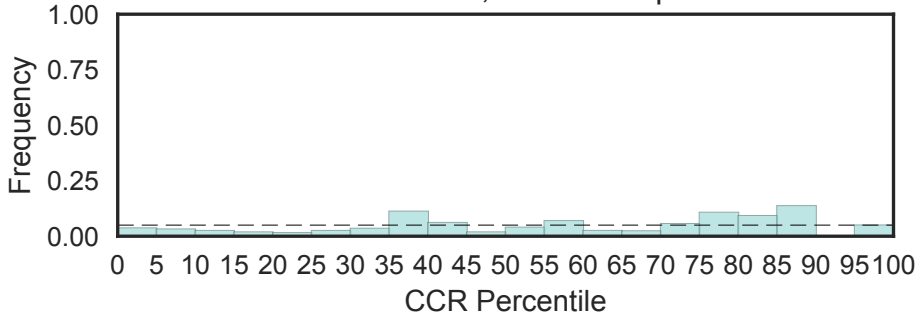

2'-5'-oligoadenylate synthetase 1, domain 2, C-terminus  
(OAS1\_C, N=7)

Fisher's OR: 0; Bonferroni p-val: 1

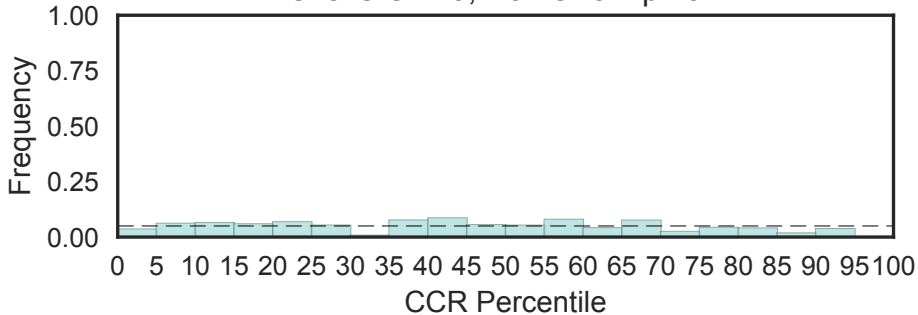

Organic Anion Transporter Polypeptide (OATP) family  
(OATP, N=17)

Fisher's OR: 0.123; Bonferroni p-val: 7.52e-06

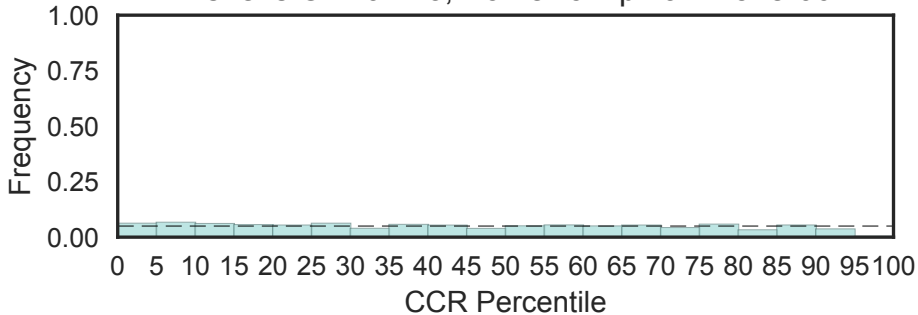

Oligonucleotide/oligosaccharide-binding (OB)-fold  
(OB\_NTP\_bind, N=17)

Fisher's OR: 2.25; Bonferroni p-val: 1

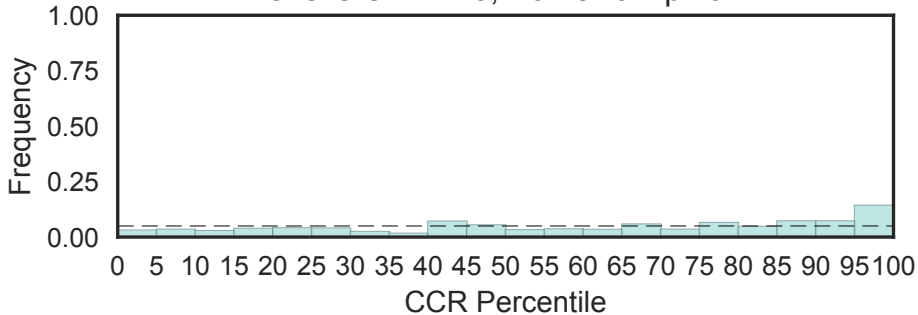



OCC1 family  
(OCC1, N=1)

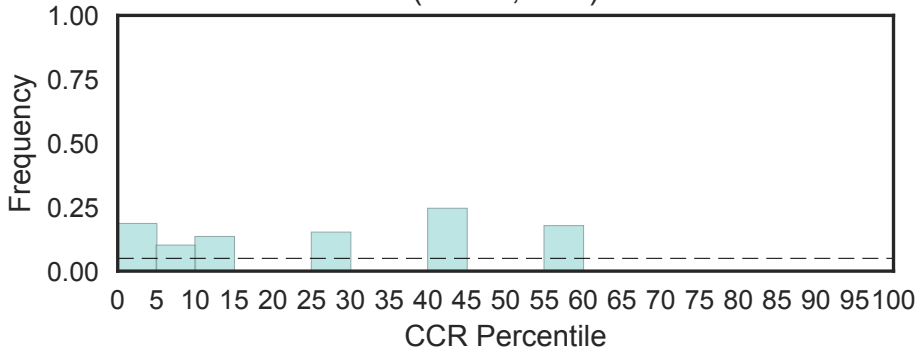

Ornithine cyclodeaminase/mu-crystallin family  
(OCD\_Mu\_crystall, N=1)

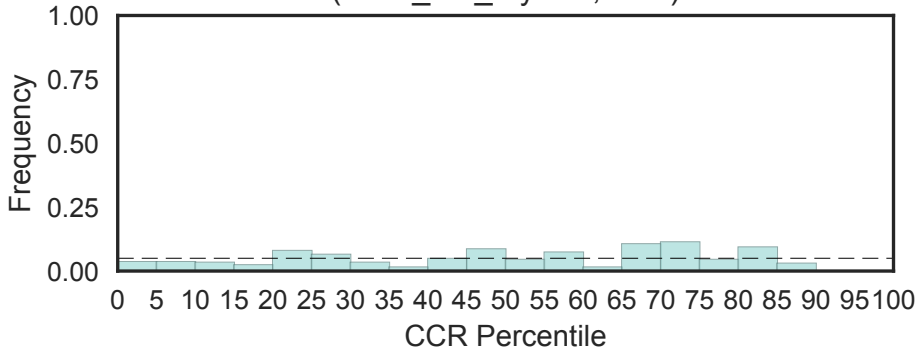

# Ovarian carcinoma immunoreactive antigen (OCIA) (OCIA, N=2)

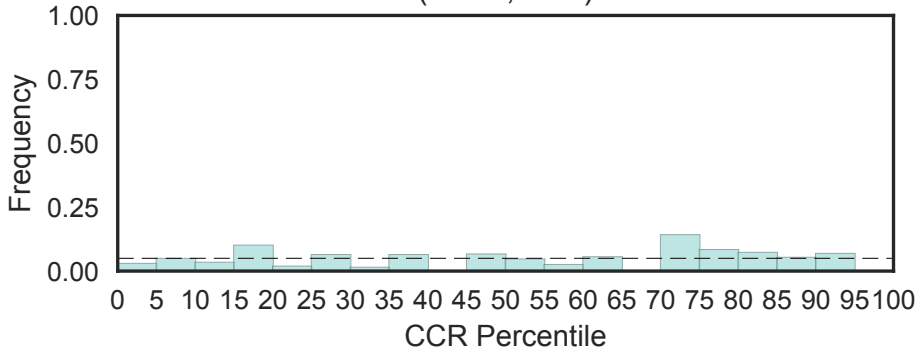

Odontogenic ameloblast-associated family  
(ODAM, N=1)

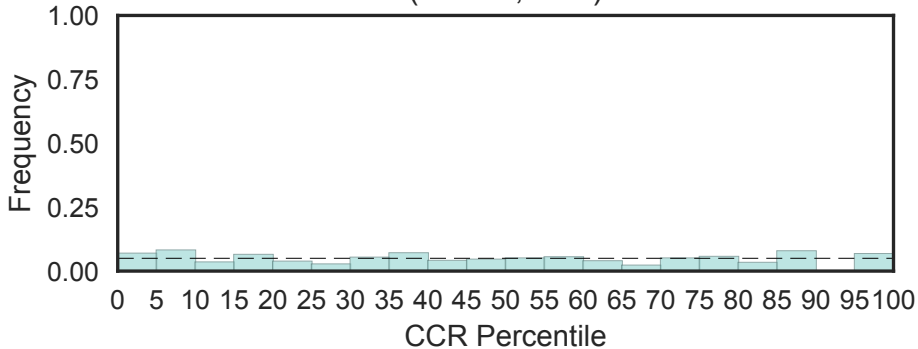

Ornithine decarboxylase antizyme  
(ODC\_AZ, N=3)

Fisher's OR: 1.09; Bonferroni p-val: 1

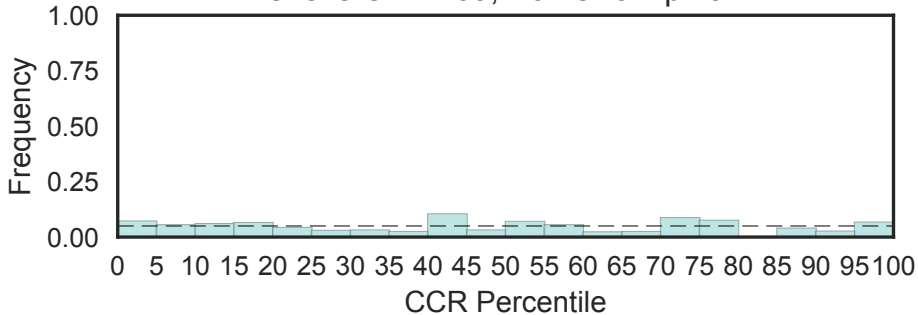

Olfactory receptor 4-like  
(ODR4-like, N=3)

Fisher's OR: 0.872; Bonferroni p-val: 1

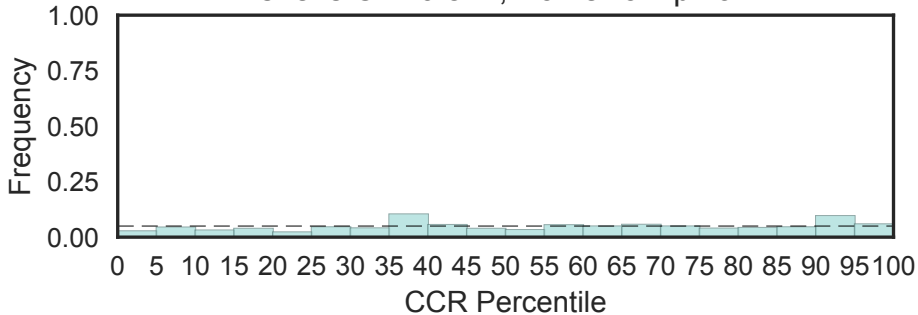

Orofacial cleft 1 candidate gene 1 protein  
(OFCC1, N=1)

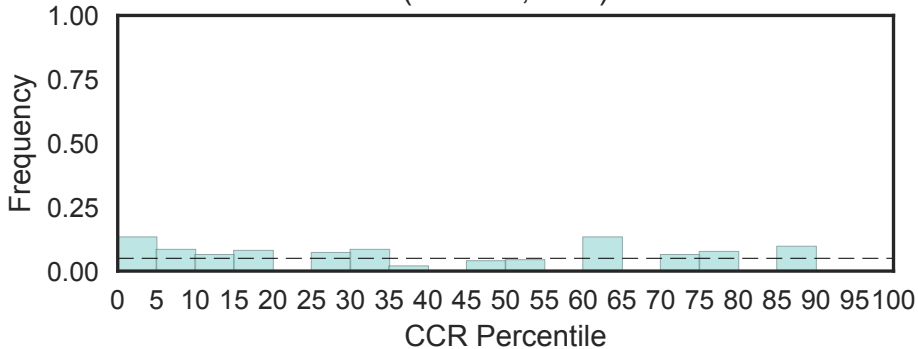

Opioid growth factor receptor repeat  
(OGFr\_III, N=4)

Fisher's OR: 0; Bonferroni p-val: 1

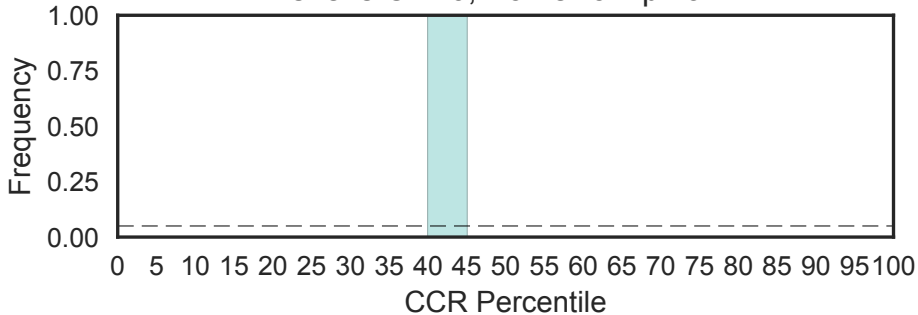



# Opioid growth factor receptor (OGFr) conserved region (OGFr\_N, N=2)

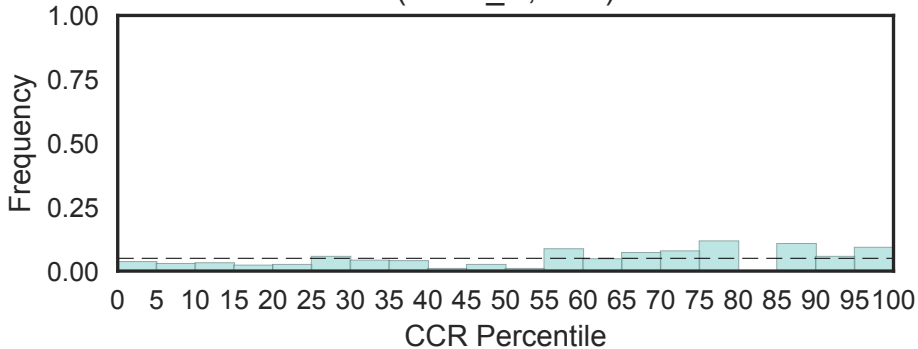

8-oxoguanine DNA glycosylase, N-terminal domain  
(OGG\_N, N=1)

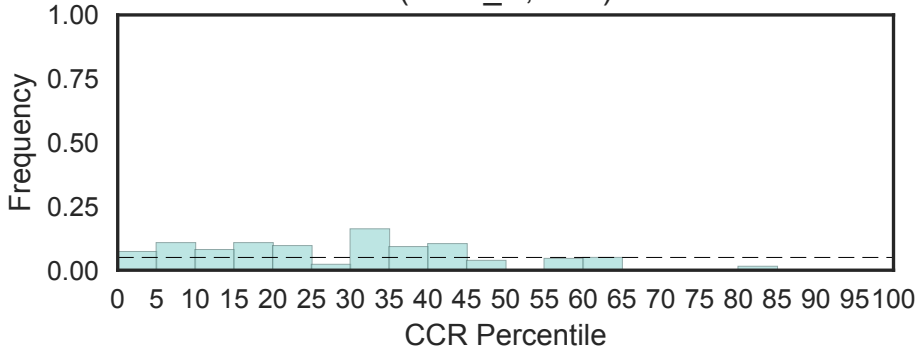

OHCU decarboxylase  
(OHCU\_decarbox, N=1)

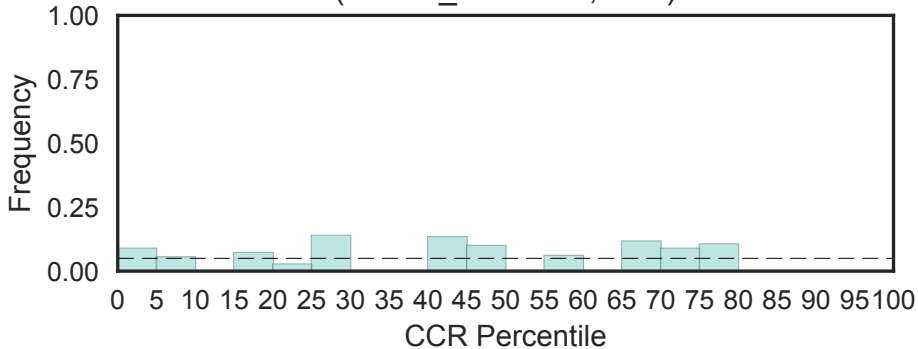

Olfactomedin-like domain  
(OLF, N=13)

Fisher's OR: 1.01; Bonferroni p-val: 1

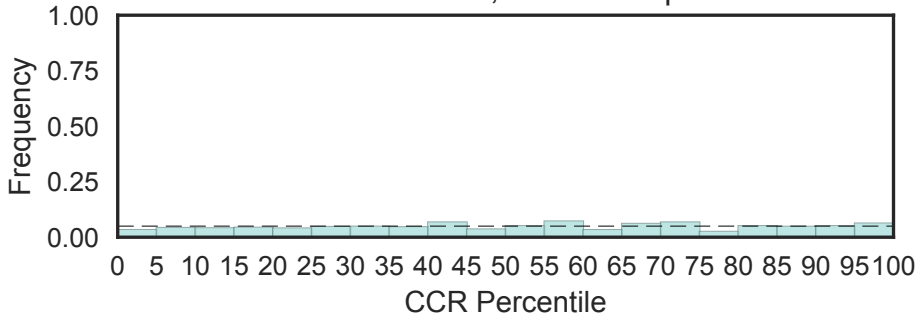

Orotidine 5'-phosphate decarboxylase / HUMPS family  
(OMPdecase, N=1)

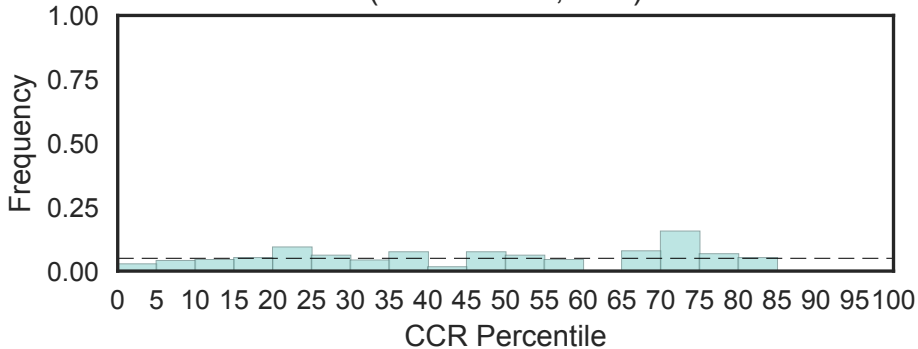

Optic atrophy 3 protein (OPA3)  
(OPA3, N=1)

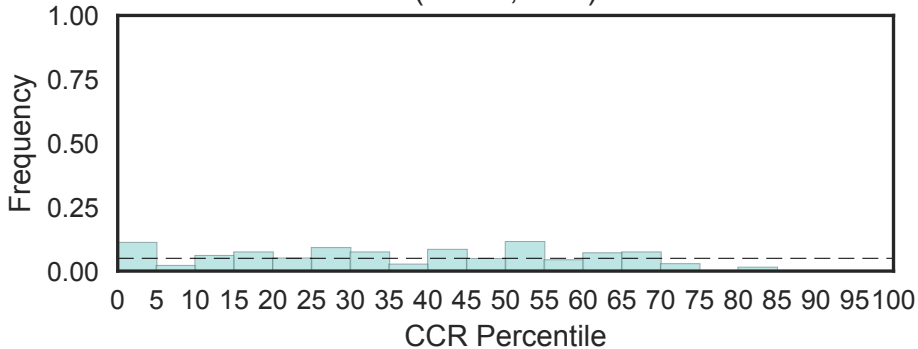

Origin recognition complex subunit 2  
(ORC2, N=1)

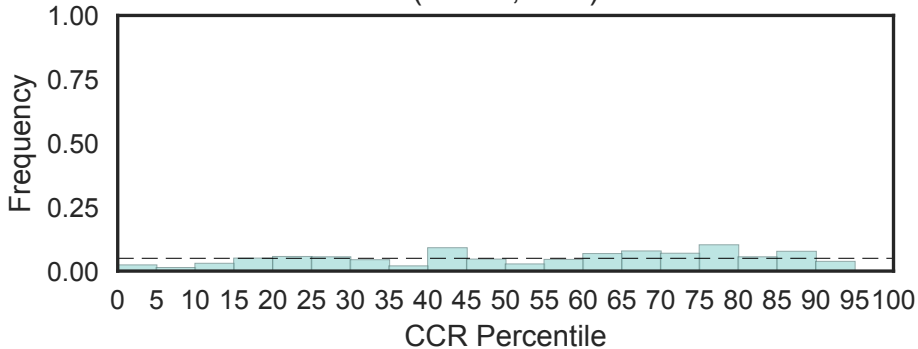

Origin recognition complex (ORC) subunit 3 N-terminus  
(ORC3\_N, N=1)

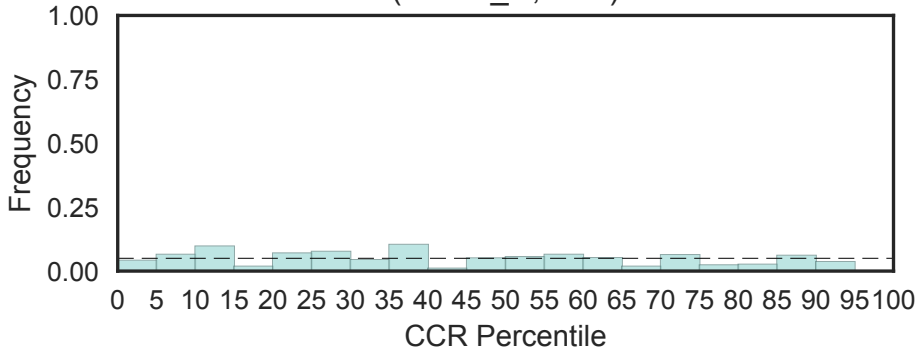



Origin recognition complex (ORC) subunit 4 C-terminus  
(ORC4\_C, N=1)

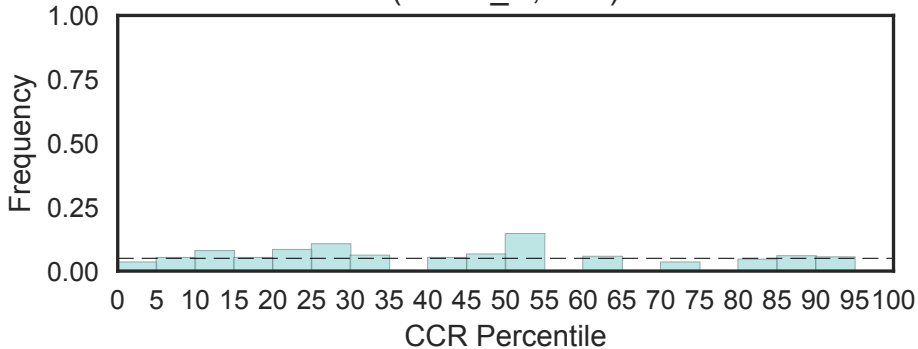

Origin recognition complex (ORC) subunit 5 C-terminus  
(ORC5\_C, N=1)

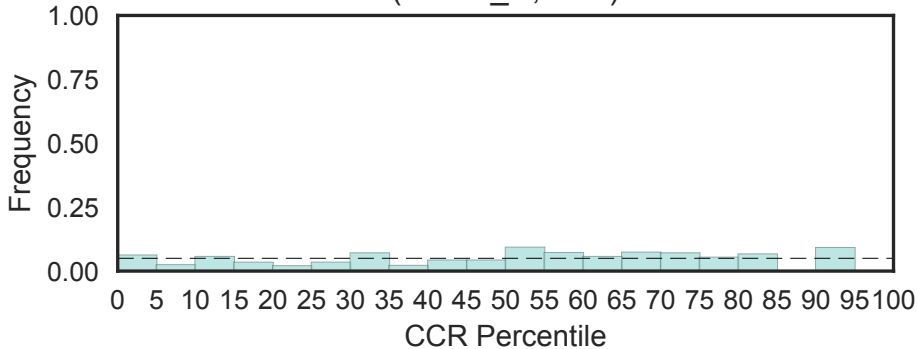

Origin recognition complex subunit 6 (ORC6)  
(ORC6, N=1)

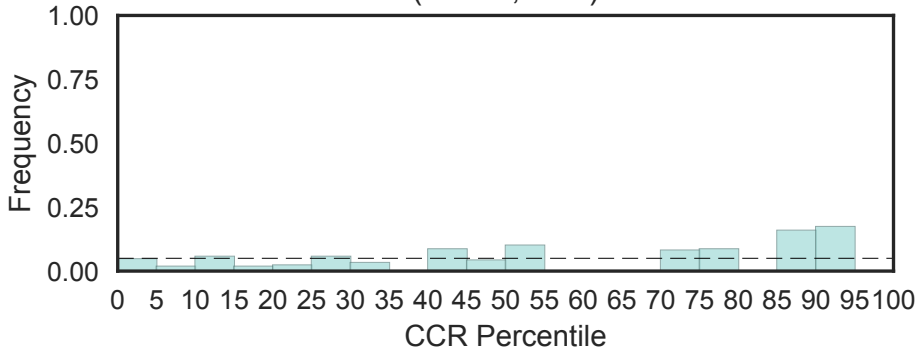

ORMDL family  
(ORMDL, N=4)

Fisher's OR: 0; Bonferroni p-val: 1

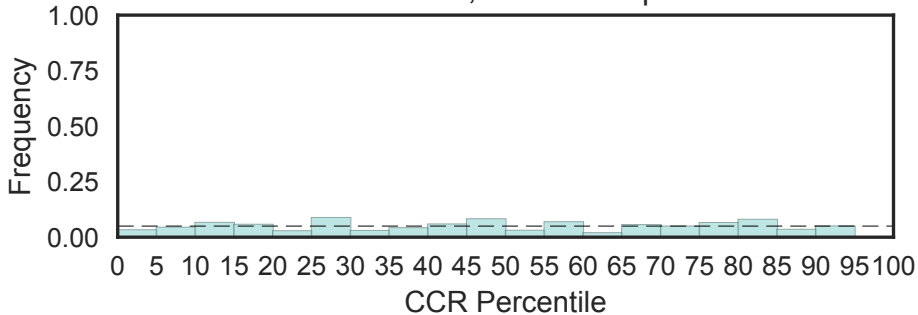

ATP synthase delta (OSCP) subunit  
(OSCP, N=2)

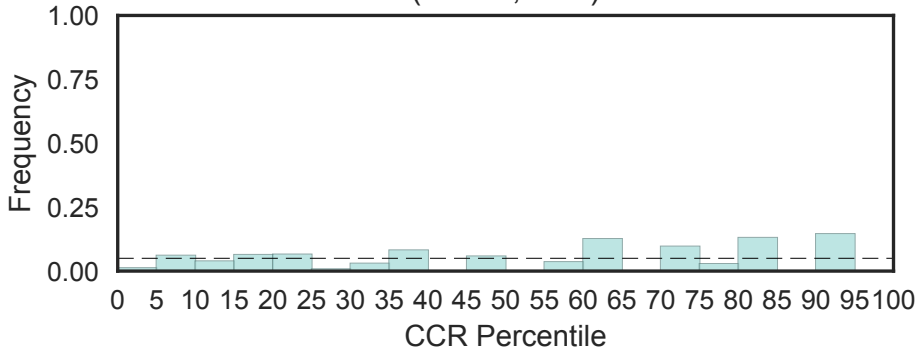

Oxidative-stress-responsive kinase 1 C-terminal domain  
(OSR1\_C, N=5)

Fisher's OR: 3.49; Bonferroni p-val: 1

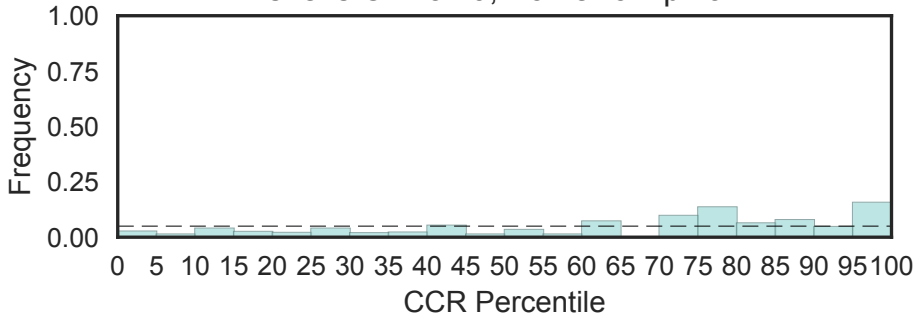

OST-HTH/LOTUS domain  
(OST-HTH, N=10)

Fisher's OR: 0.447; Bonferroni p-val: 1

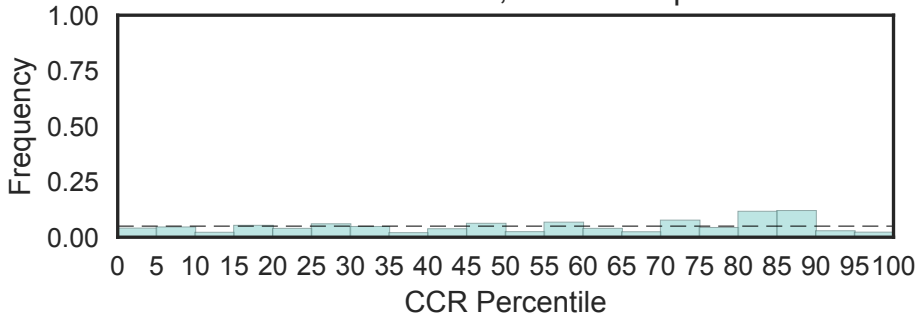

OST3 / OST6 family, transporter family  
(OST3\_OST6, N=3)

Fisher's OR: 0; Bonferroni p-val: 1

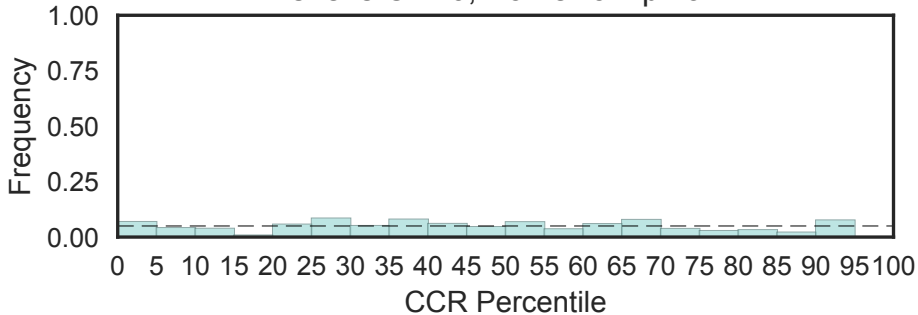



# Osteopetrosis-associated transmembrane protein 1 precursor (OSTMP1, N=1)

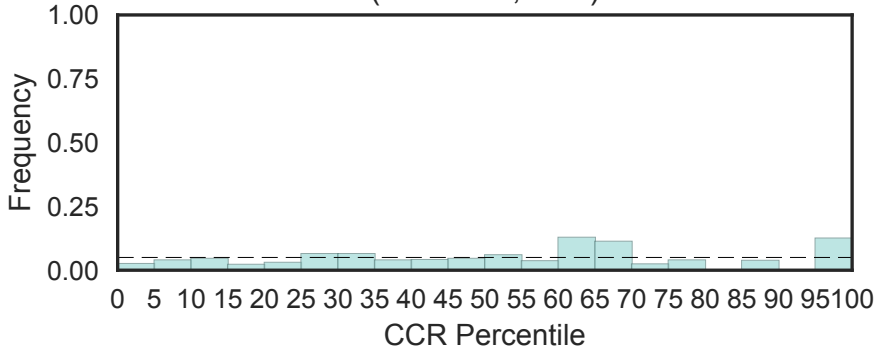

Organic solute transporter subunit beta protein  
(OSTbeta, N=1)

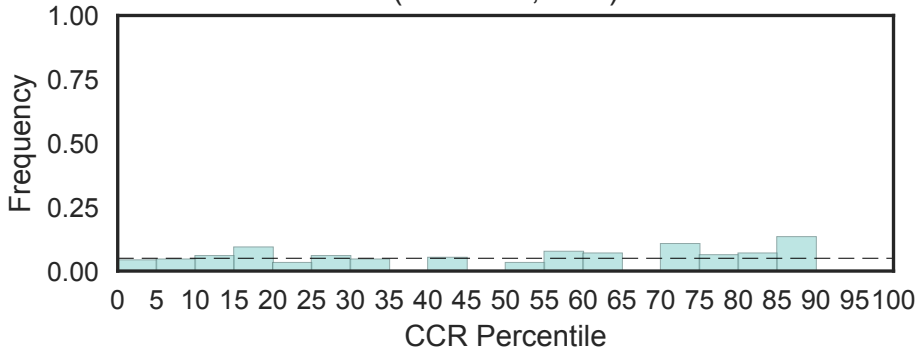

# Aspartate/ornithine carbamoyltransferase, Asp/Orn binding domain (OTCace, N=1)

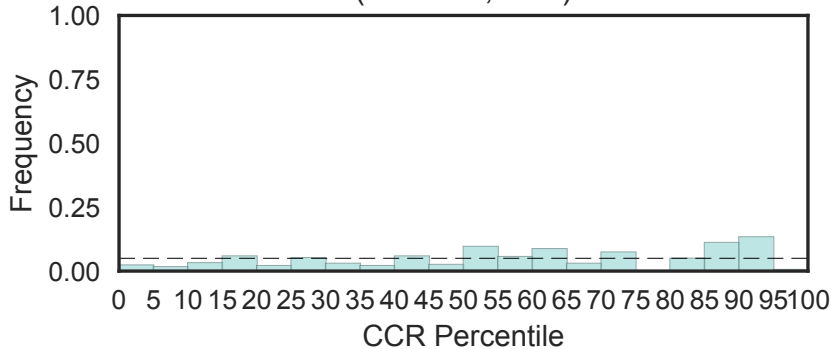

# Aspartate/ornithine carbamoyltransferase, carbamoyl-P binding domain (OTCace\_N, N=1)

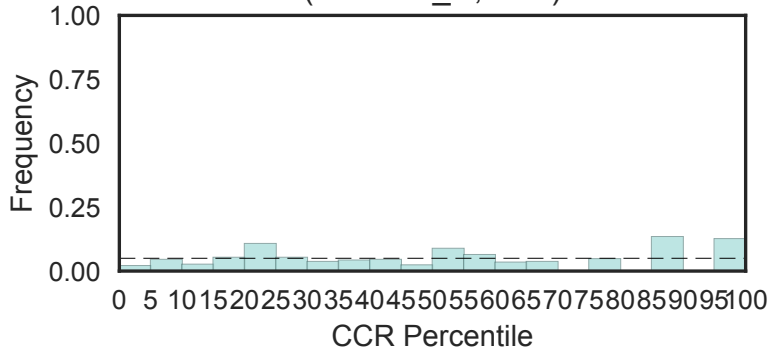

Otospiralin  
(OTOS, N=1)

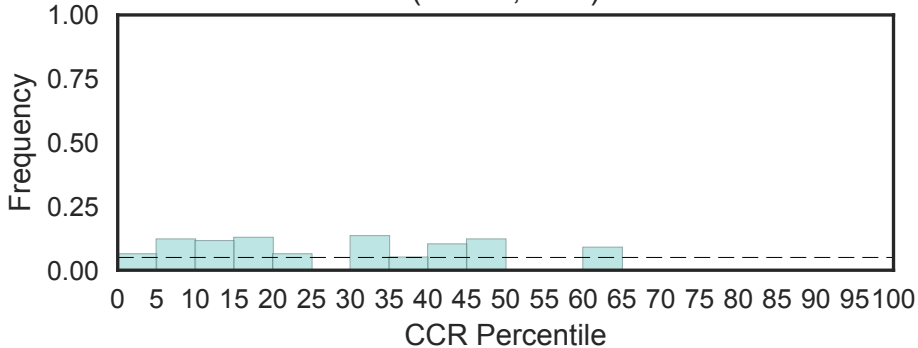

OTU-like cysteine protease  
(OTU, N=11)

Fisher's OR: 6.28; Bonferroni p-val: 1.59e-05

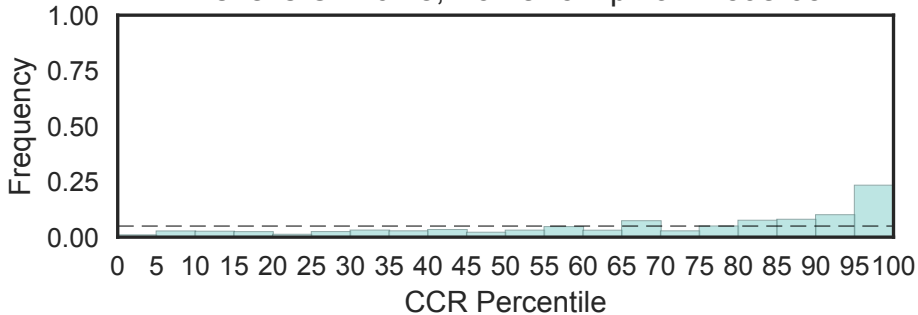

# Occludin homology domain

(Occludin\_ELL, N=6)

Fisher's OR: 1.15; Bonferroni p-val: 1

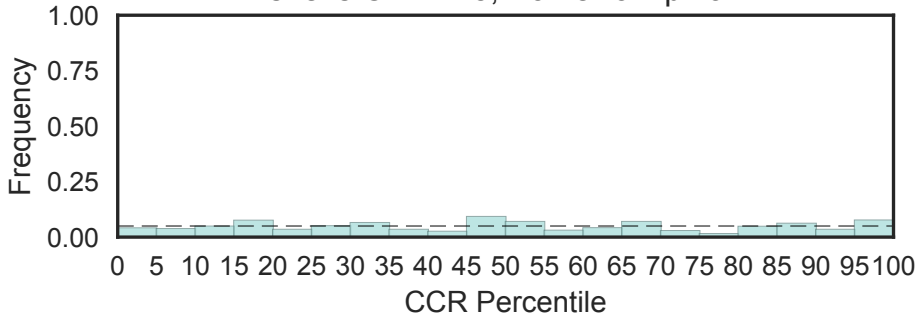

Janus/Ocnus family (Ocnus)  
(Ocnus, N=1)

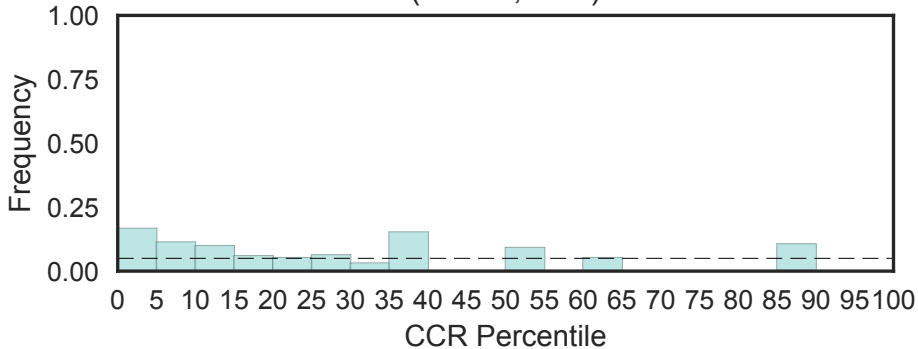



Oestrogen receptor  
(Oest\_recep, N=1)

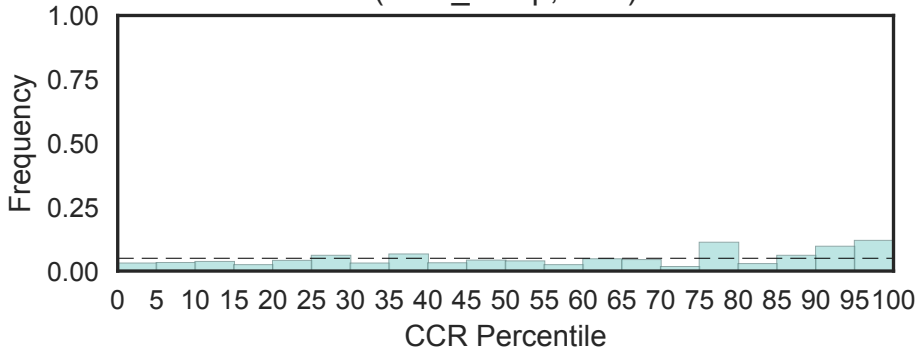

# Oxoglutarate and iron-dependent oxygenase degradation C-term (Ofd1\_CTDD, N=1)

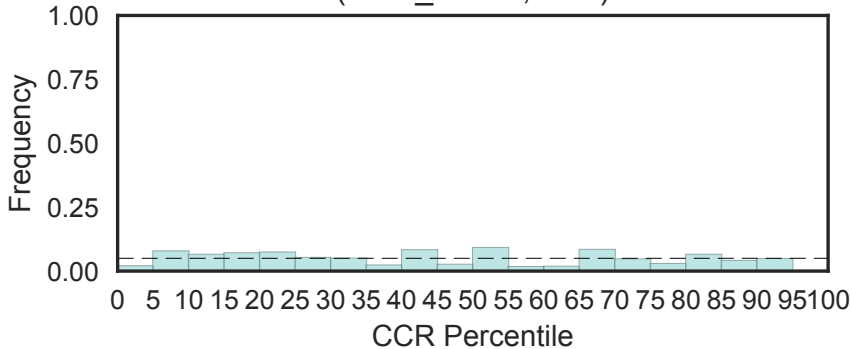

Olfactory marker protein  
(Olfactory\_mark, N=1)

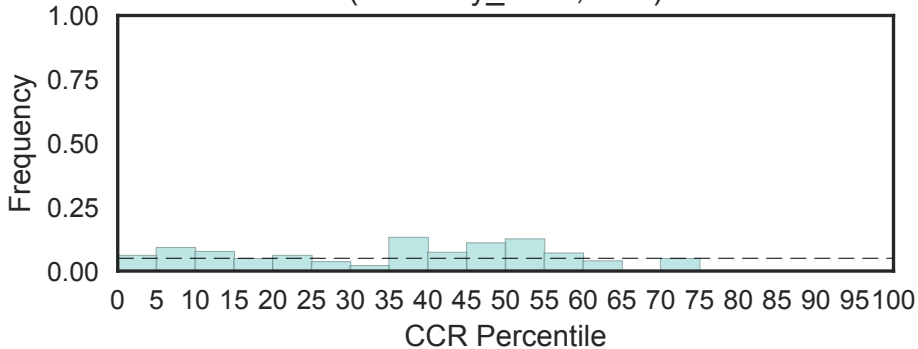

Opioids neuropeptide  
(Op\_neuropeptide, N=1)

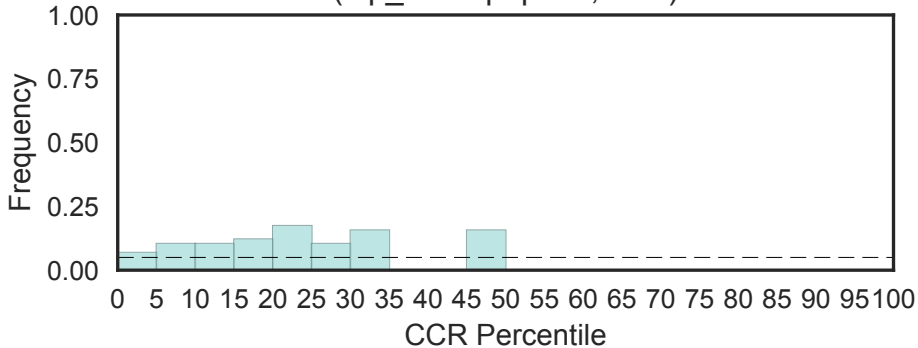

Vertebrate endogenous opioids neuropeptide  
(Opioids\_neuropep, N=3)

Fisher's OR: 0; Bonferroni p-val: 1

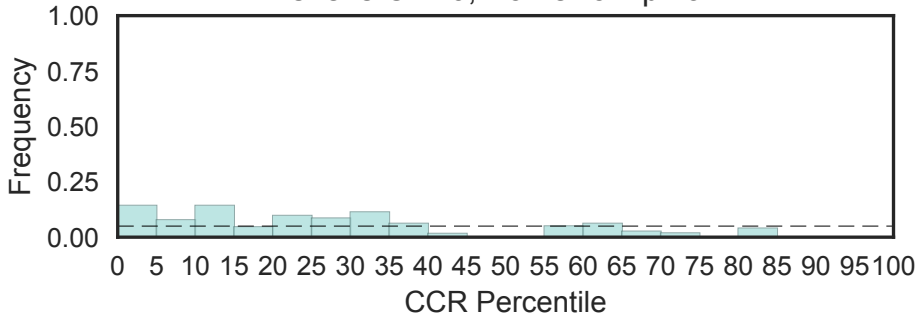

Mediator of CRAC channel activity  
(Orai-1, N=3)

Fisher's OR: 0; Bonferroni p-val: 1

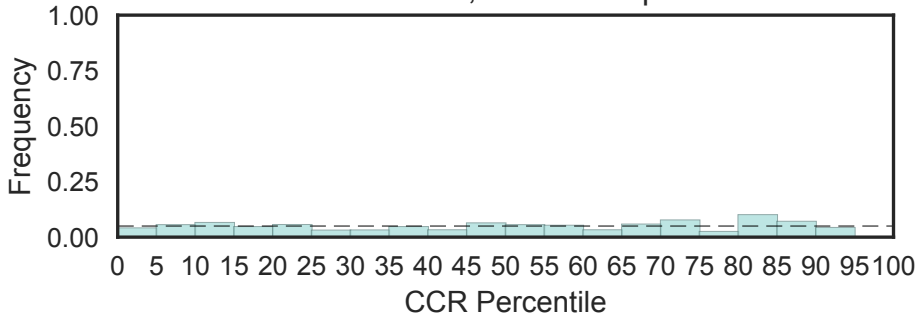

Prepro-orexin  
(Orexin, N=1)

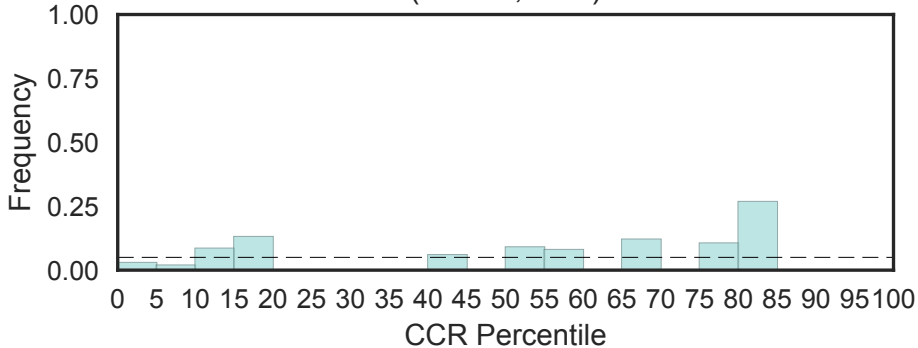

Orexin receptor type 2  
(Orexin\_rec2, N=1)

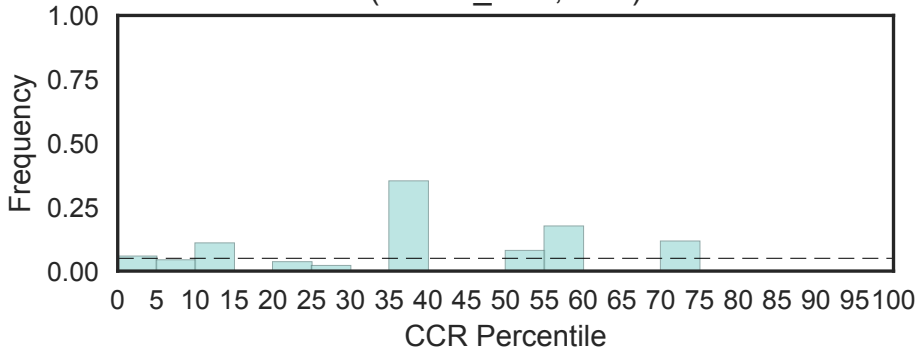



Pyridoxal-dependent decarboxylase, pyridoxal binding domain  
(Orn\_Arg\_deC\_N, N=3)

Fisher's OR: 0.449; Bonferroni p-val: 1

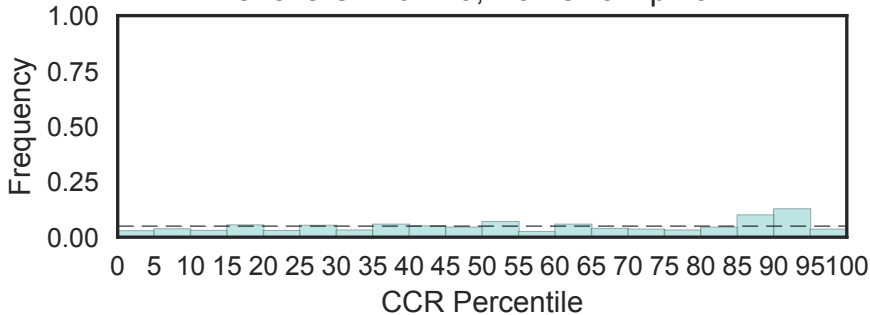

Pyridoxal-dependent decarboxylase, C-terminal sheet domain  
(Orn\_DAP\_Arg\_deC, N=3)

Fisher's OR: 0.726; Bonferroni p-val: 1

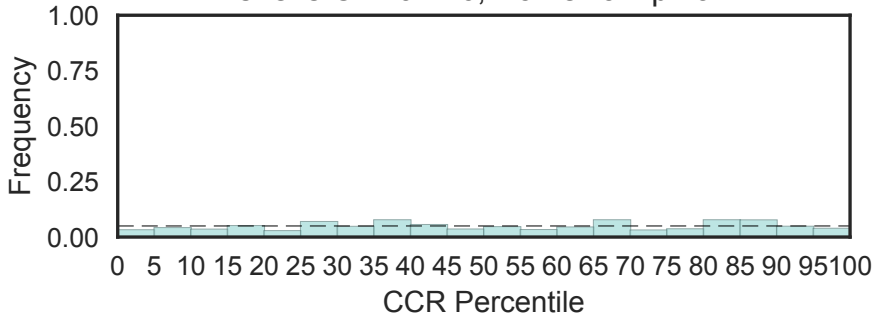

Organic solute transport protein 1  
(Oscp1, N=1)

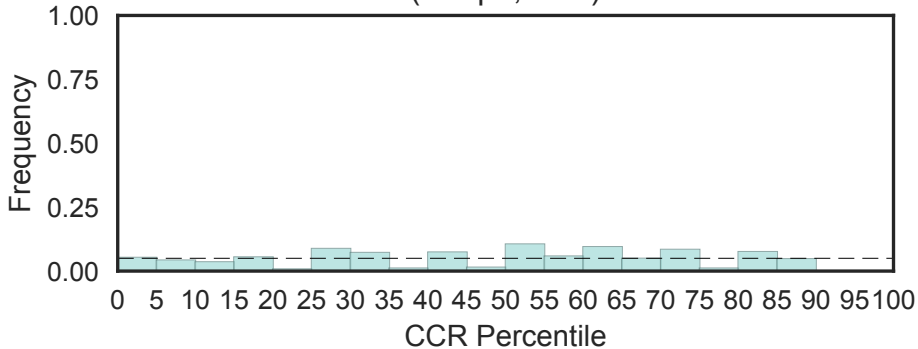

# Oligosaccaryltransferase (Ost4, N=1)

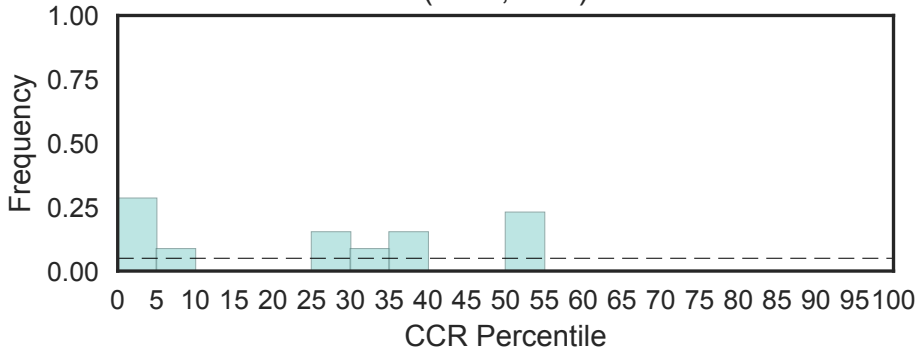

# Oligosaccharyltransferase subunit 5 (Ost5, N=1)

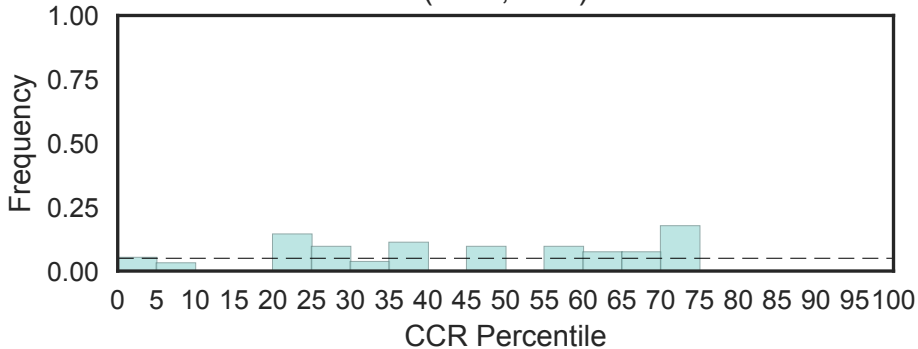

# Osteopontin (Osteopontin, N=1)

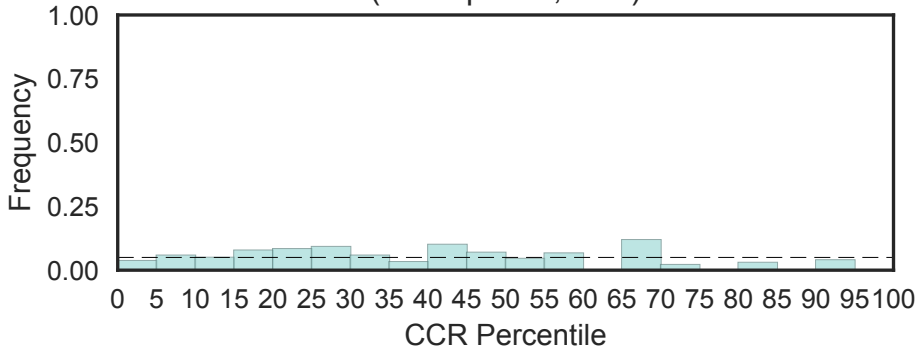

# Osteoregulin (Osteoregulin, N=1)

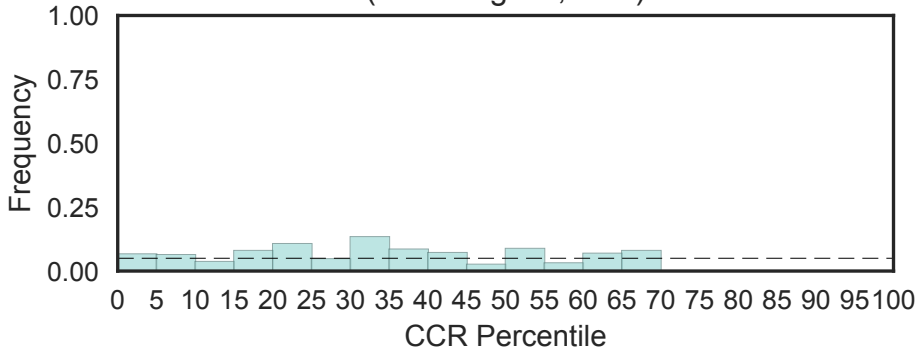

# Otopetrin

(Otopetrin, N=9)

Fisher's OR: 0; Bonferroni p-val: 1

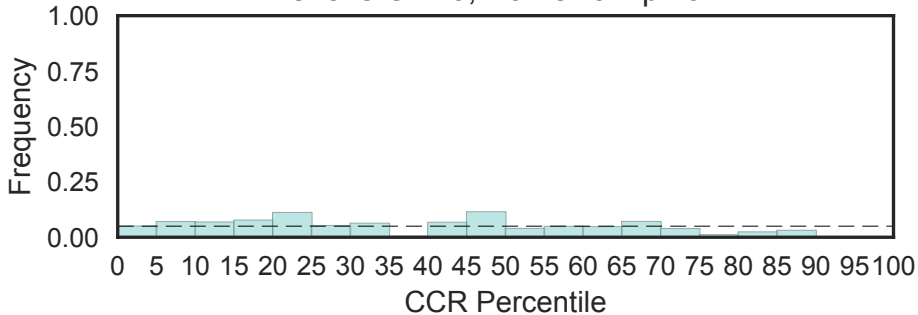



Oxidoreductase-like protein, N-terminal  
(Oxidored-like, N=2)

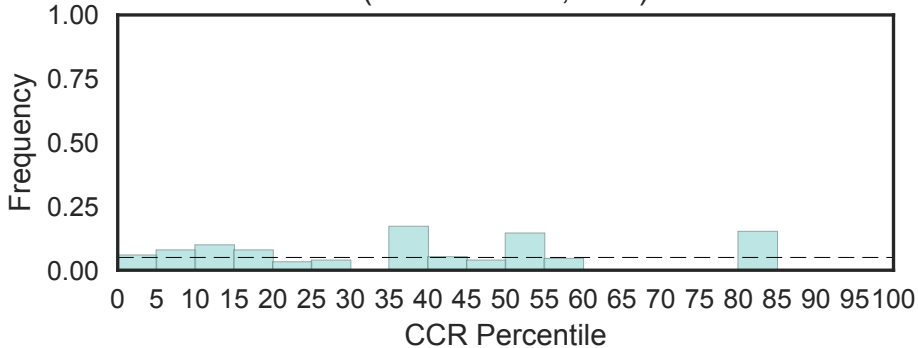

Oxidoreductase molybdopterin binding domain  
(Oxidored\_molyb, N=1)

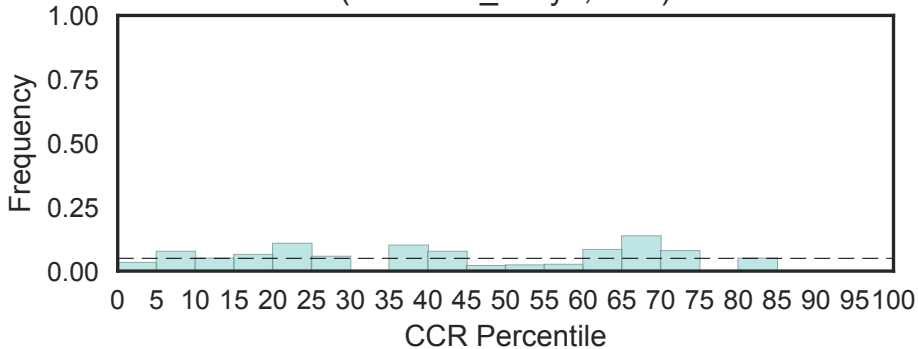

NADH ubiquinone oxidoreductase, 20 Kd subunit  
(Oxidored\_q6, N=1)

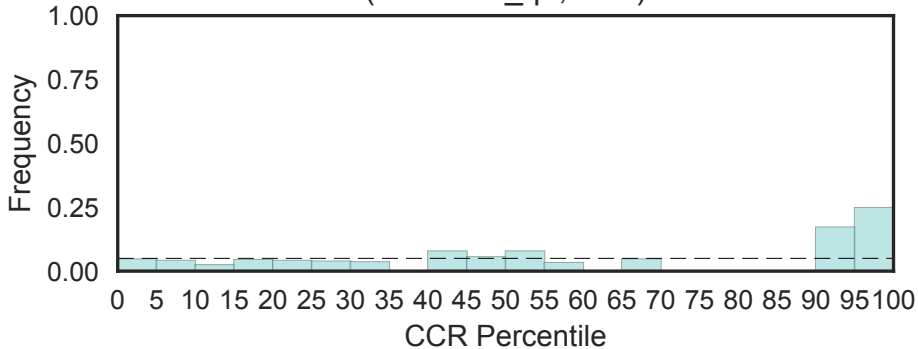

2-oxoglutarate dehydrogenase C-terminal  
(OxoGdeHyase\_C, N=3)

Fisher's OR: 0.552; Bonferroni p-val: 1

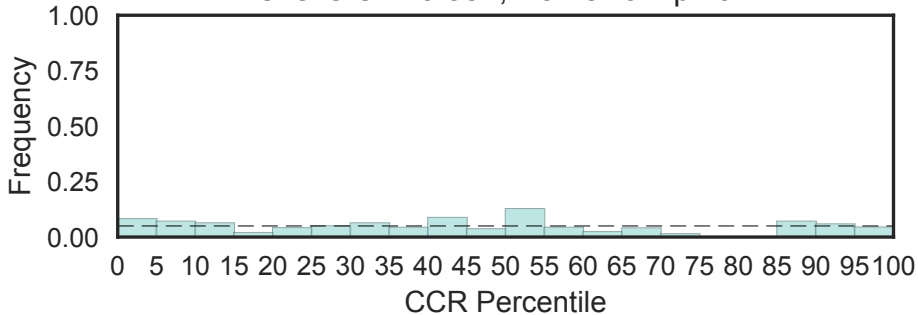

Oxysterol-binding protein  
(Oxysterol\_BP, N=14)

Fisher's OR: 1.44; Bonferroni p-val: 1

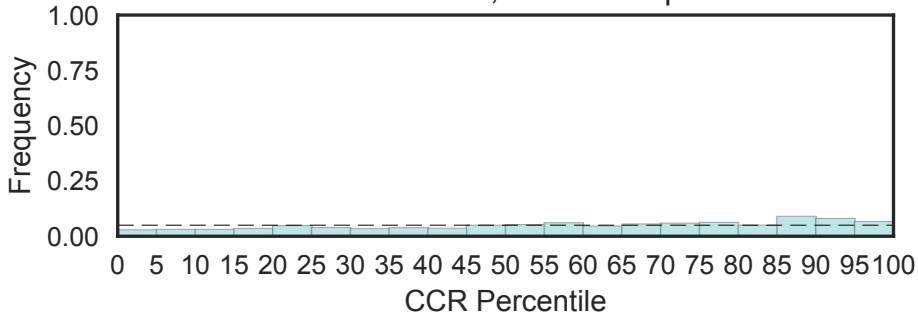

Phosphomevalonate kinase  
(P-mevalo\_kinase, N=1)

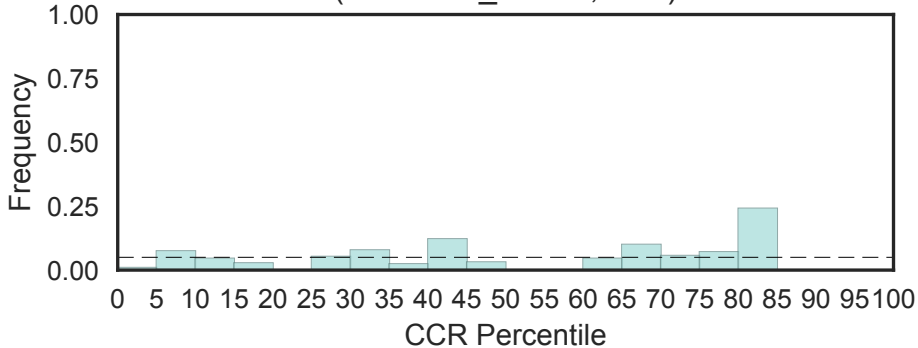

P120R (NUC006) repeat  
(P120R, N=3)

Fisher's OR: 0; Bonferroni p-val: 1

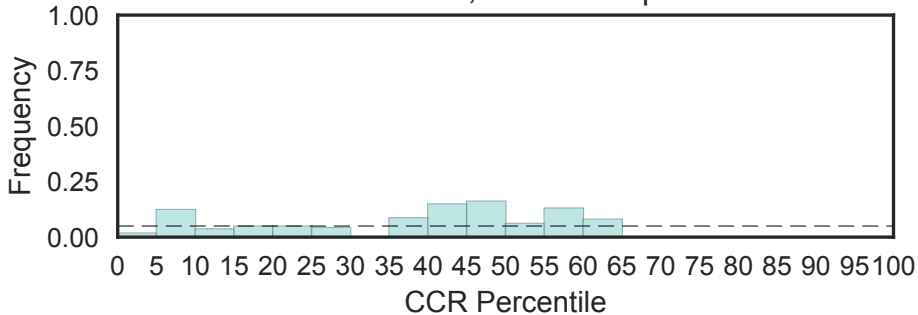

ARP2/3 complex 16 kDa subunit (p16-Arc)  
(P16-Arc, N=2)

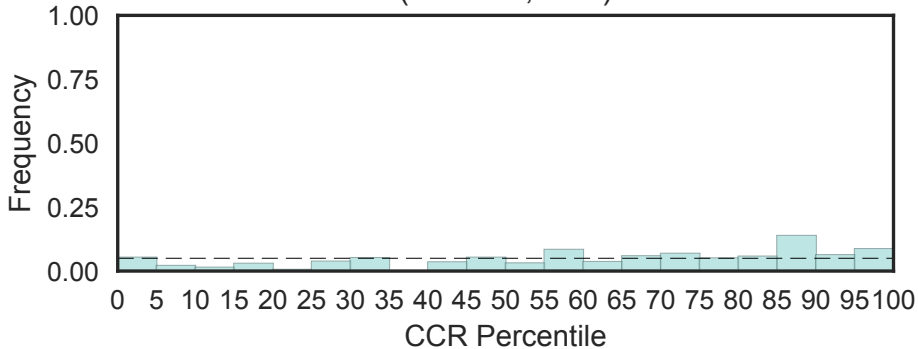



Cyclin-dependent kinase inhibitor 2a p19Arf N-terminus  
(P19Arf\_N, N=1)

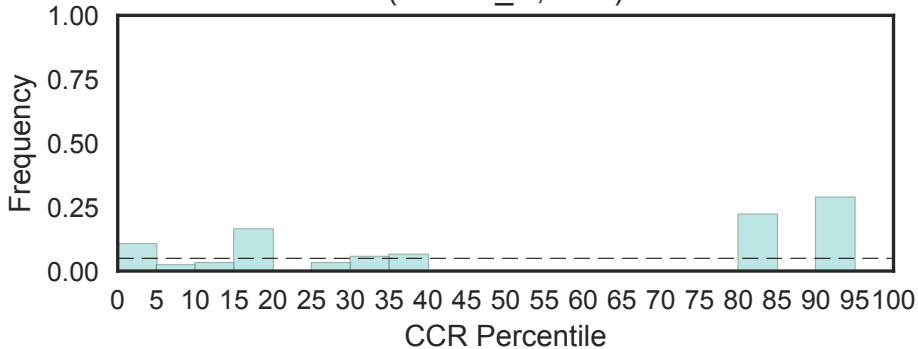

ARP2/3 complex ARPC3 (21 kDa) subunit  
(P21-Arc, N=1)

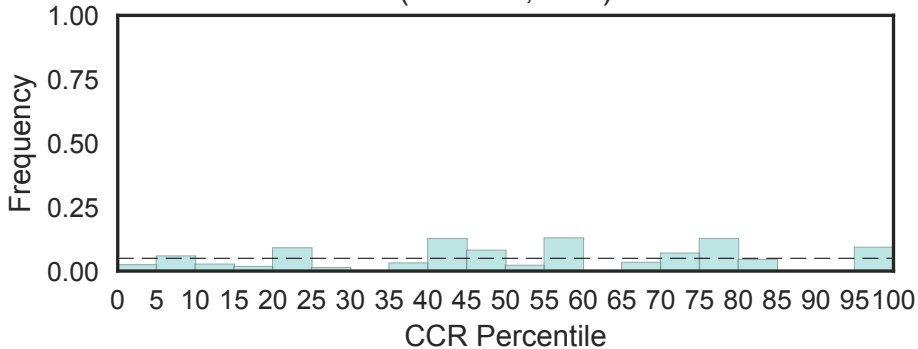

ATP P2X receptor  
(P2X\_receptor, N=8)

Fisher's OR: 0.511; Bonferroni p-val: 1

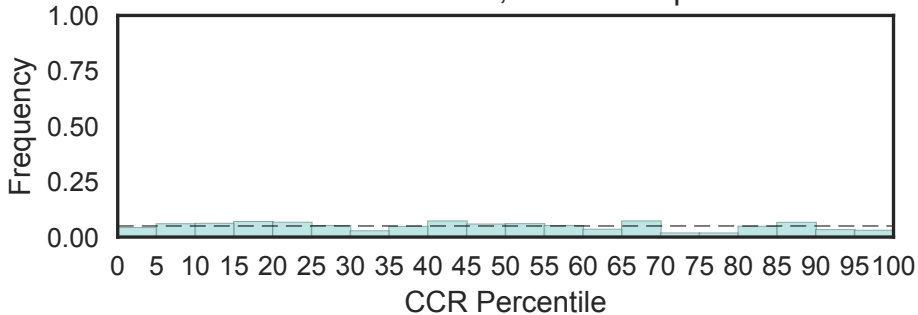

P33 mono-oxygenase  
(P33MONOX, N=1)

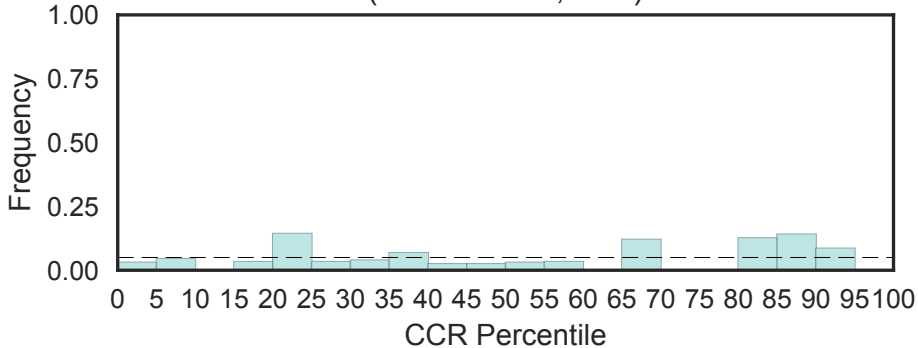

Arp2/3 complex, 34 kD subunit p34-Arc  
(P34-Arc, N=1)

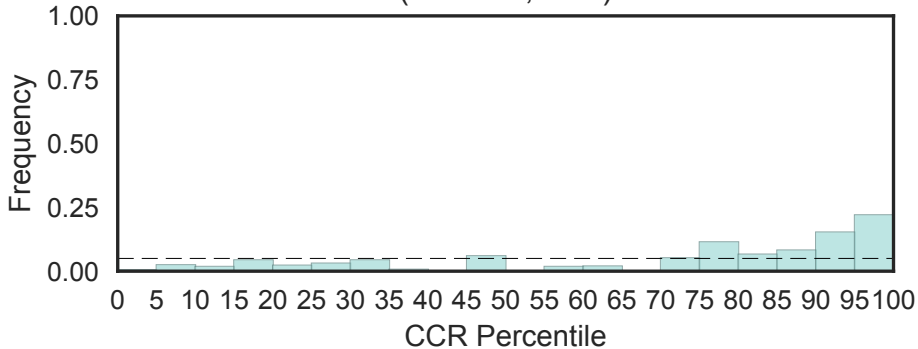

Prolyl 4-Hydroxylase alpha-subunit, N-terminal region  
(P4Ha\_N, N=3)

Fisher's OR: 0; Bonferroni p-val: 1

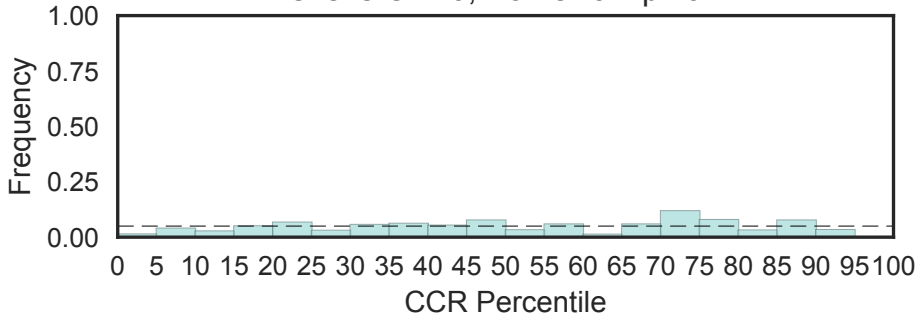

P5-type ATPase cation transporter  
(P5-ATPase, N=4)

Fisher's OR: 0; Bonferroni p-val: 1

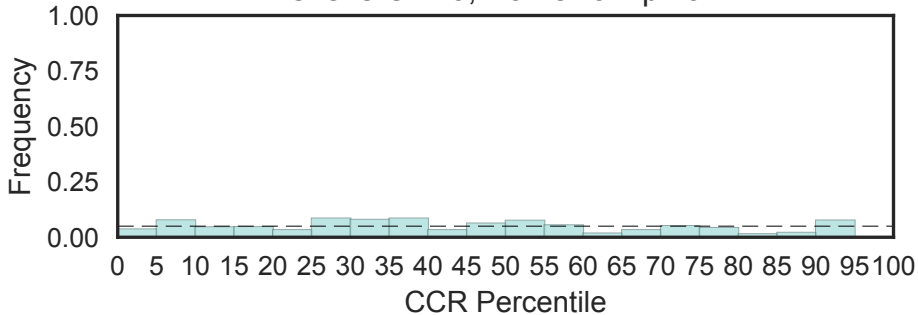

P53 DNA-binding domain  
(P53, N=3)

Fisher's OR: 3.53; Bonferroni p-val: 1

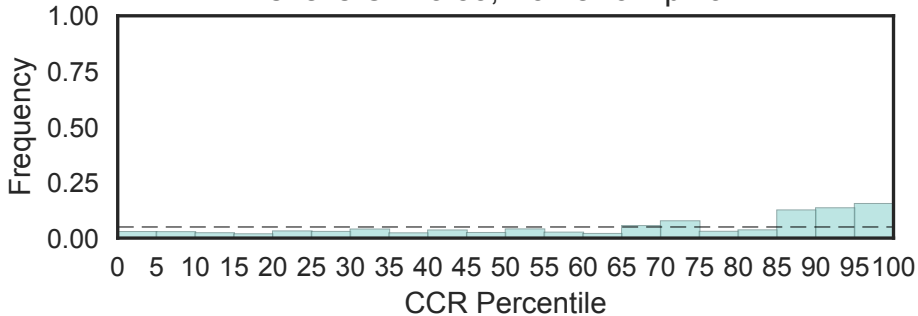



P53 transactivation motif  
(P53\_TAD, N=1)

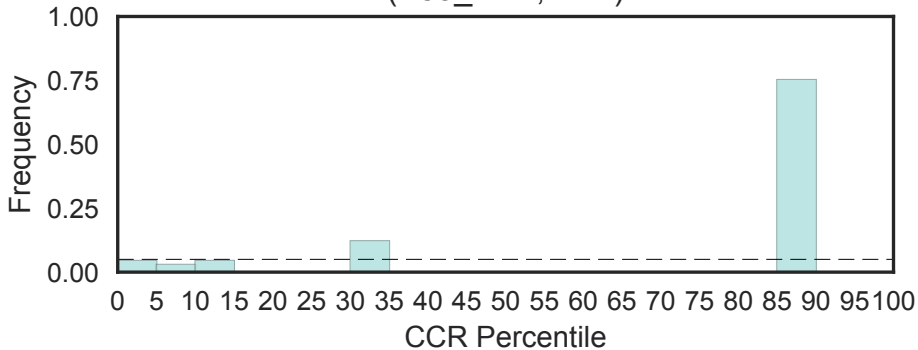

P53 tetramerisation motif  
(P53\_tetramer, N=3)  
Fisher's OR: 0; Bonferroni p-val: 1

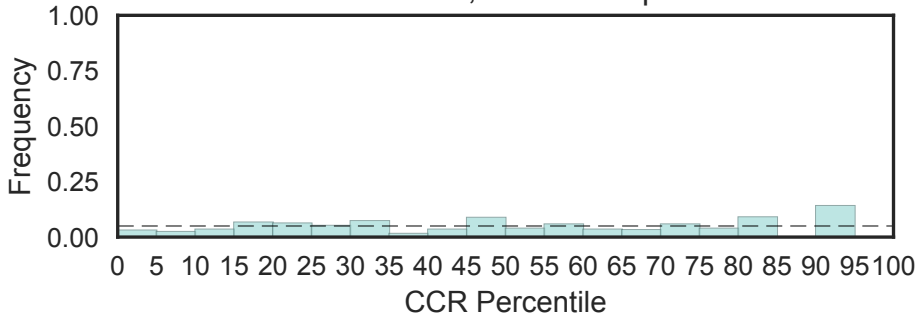

Pyrroline-5-carboxylate reductase dimerisation  
(P5CR\_dimer, N=5)

Fisher's OR: 0.581; Bonferroni p-val: 1

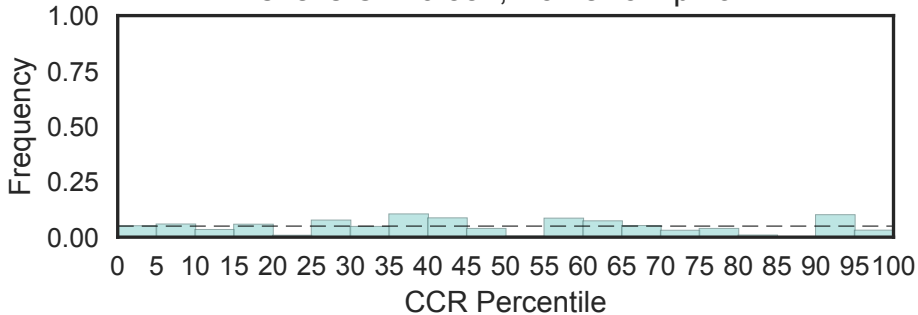

# Coiled-coil and interaction region of P66A and P66B with MBD2 (P66\_CC, N=2)

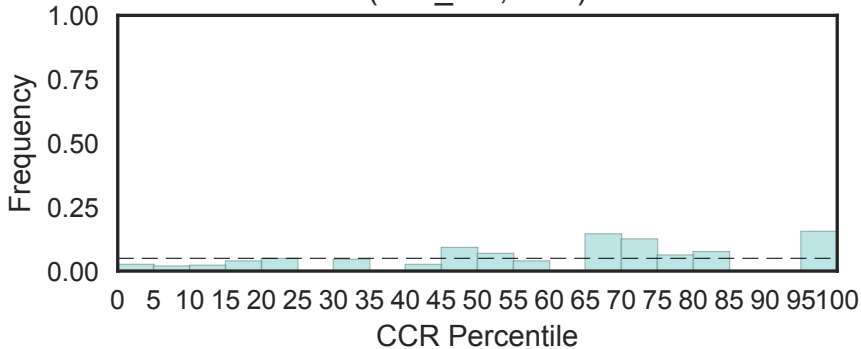

P68HR (NUC004) repeat  
(P68HR, N=2)

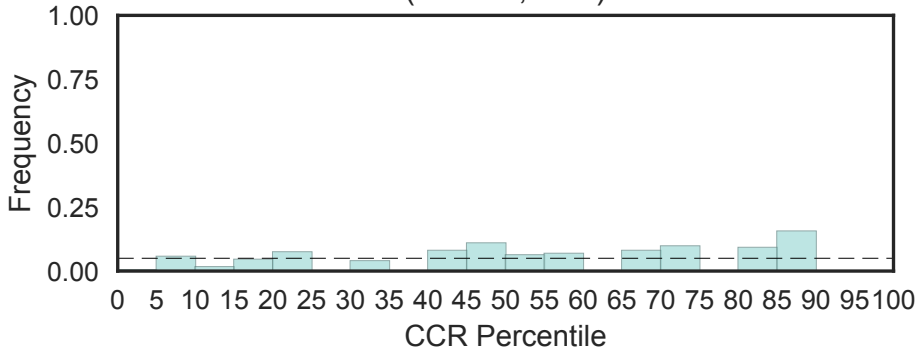

PA domain  
(PA, N=16)

Fisher's OR: 0.689; Bonferroni p-val: 1

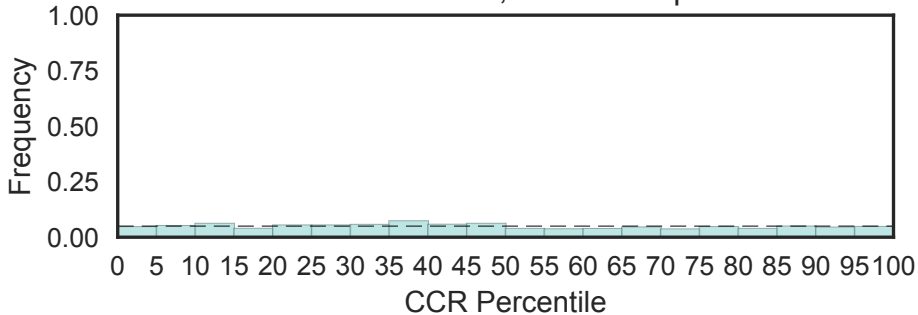

PA14 domain  
(PA14, N=3)

Fisher's OR: 0; Bonferroni p-val: 1

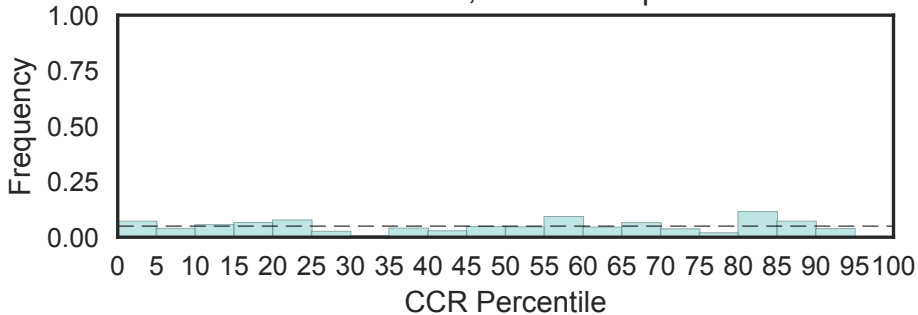

PA26 p53-induced protein (sestrin)  
(PA26, N=3)

Fisher's OR: 1.52; Bonferroni p-val: 1

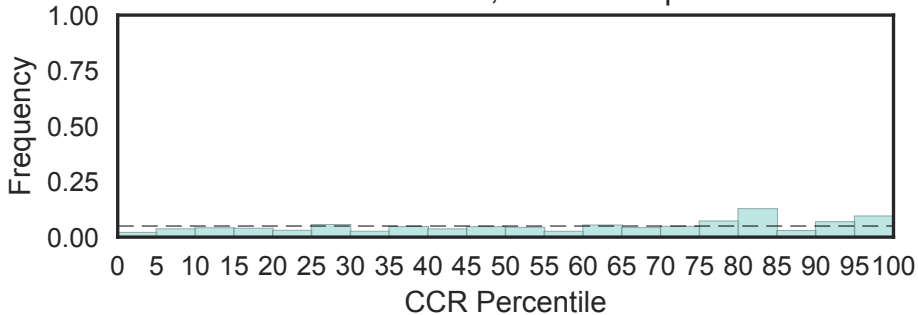



Proteasome activator pa28 alpha subunit  
(PA28\_alpha, N=3)

Fisher's OR: 0; Bonferroni p-val: 1

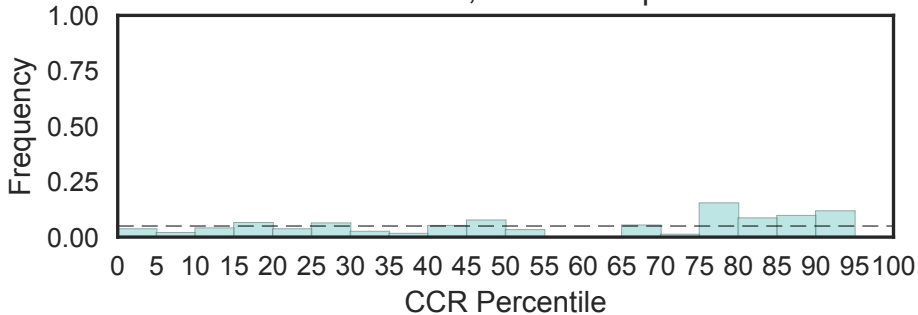

Proteasome activator pa28 beta subunit  
(PA28\_beta, N=3)

Fisher's OR: 2.33; Bonferroni p-val: 1

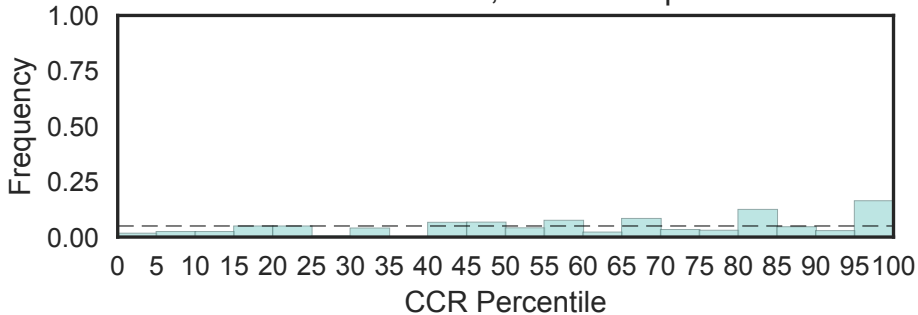

Poly-adenylate binding protein, unique domain  
(PABP, N=5)

Fisher's OR: 9.16; Bonferroni p-val: 1

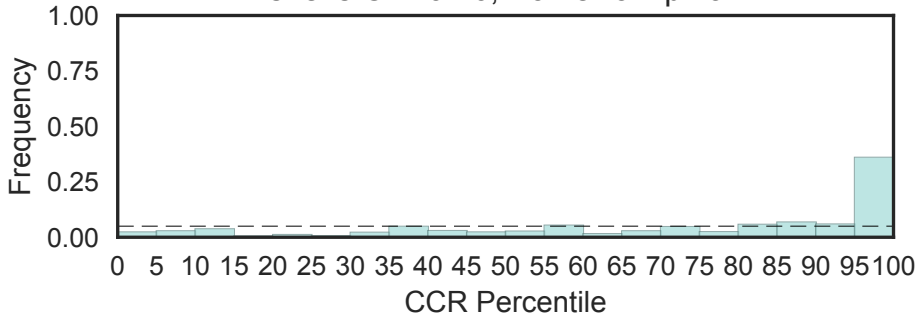

Proteasome assembly chaperone 4  
(PAC1, N=1)

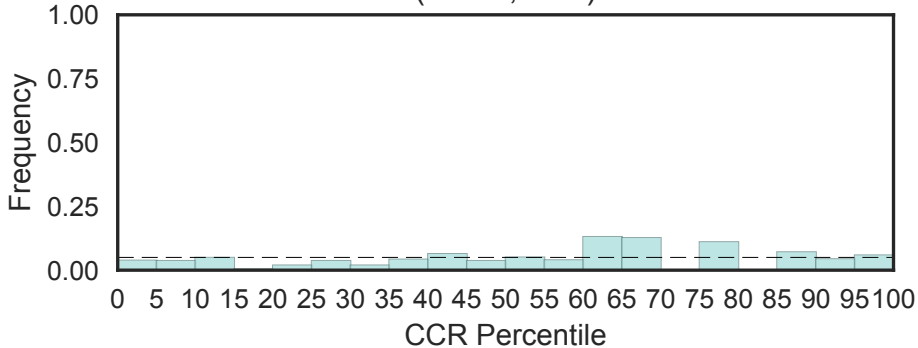

PAC2 family  
(PAC2, N=1)

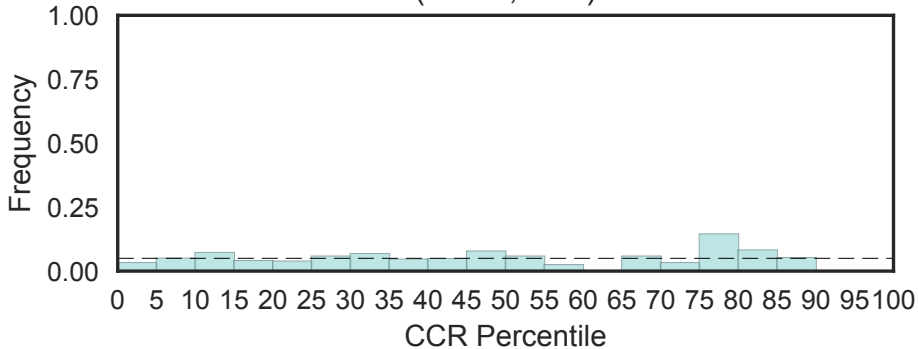

Proteasome assembly chaperone 3  
(PAC3, N=1)

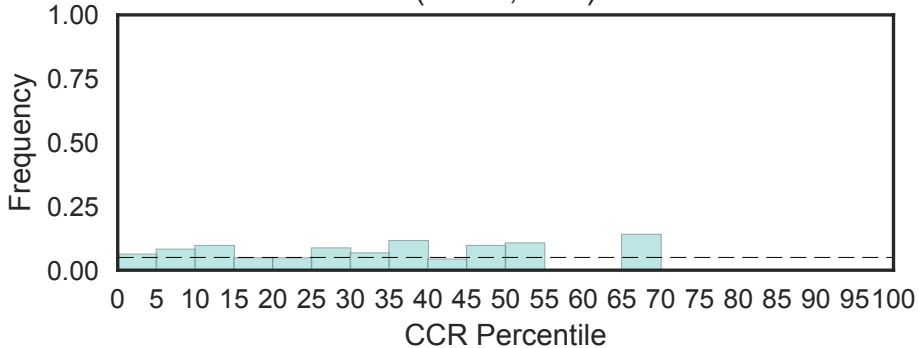

Proteasome assembly chaperone 4  
(PAC4, N=1)

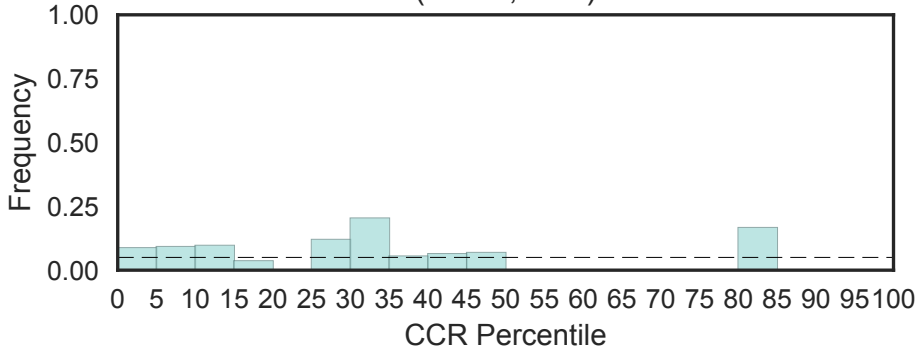

Pericentrin-AKAP-450 domain of centrosomal targeting protein  
(PACT\_coil\_coil, N=2)

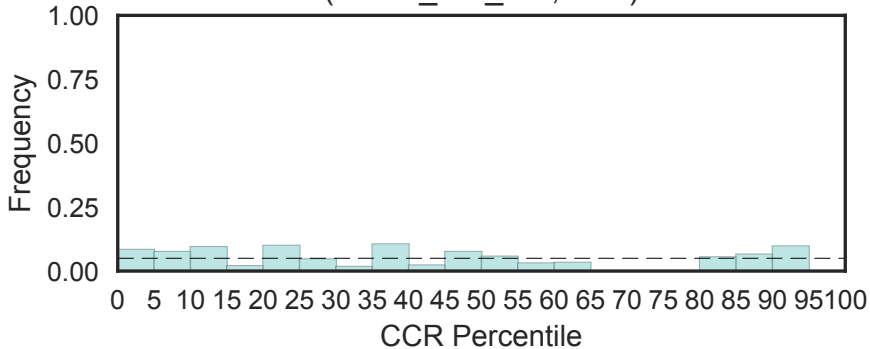



Protein-arginine deiminase (PAD)  
(PAD, N=5)

Fisher's OR: 0; Bonferroni p-val: 1

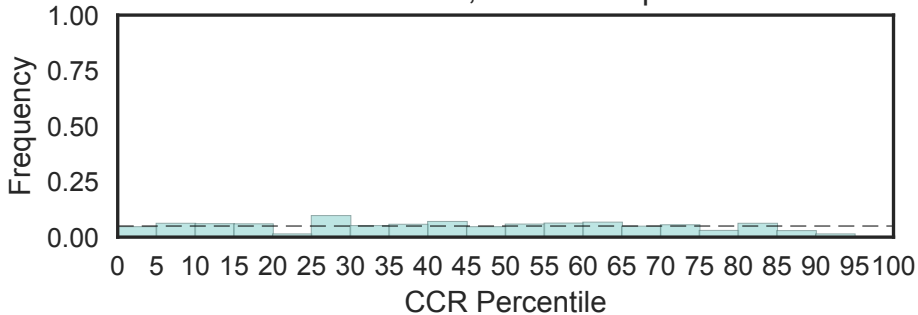

PADR1 (NUC008) domain  
(PADR1, N=1)

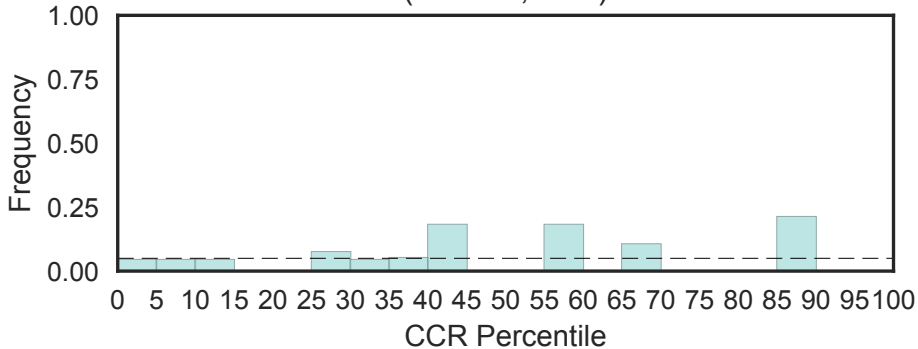

Protein-arginine deiminase (PAD) middle domain  
(PAD\_M, N=5)

Fisher's OR: 0; Bonferroni p-val: 1

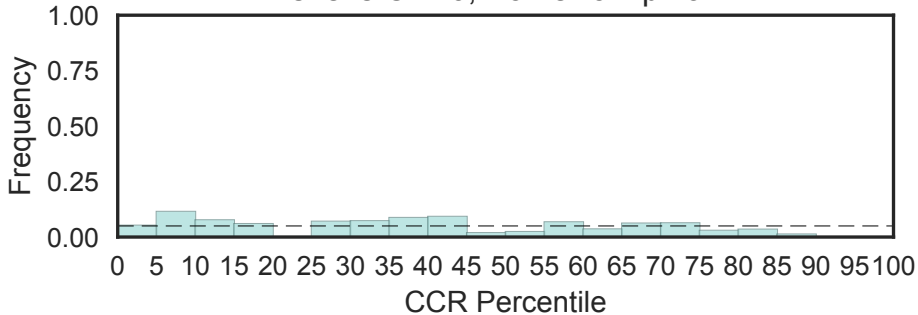

Protein-arginine deiminase (PAD) N-terminal domain  
(PAD\_N, N=5)

Fisher's OR: 0; Bonferroni p-val: 1

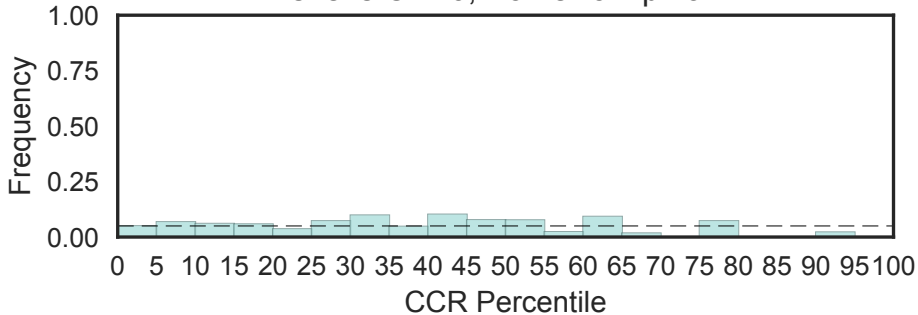

# Pectinacetylerase (PAE, N=1)

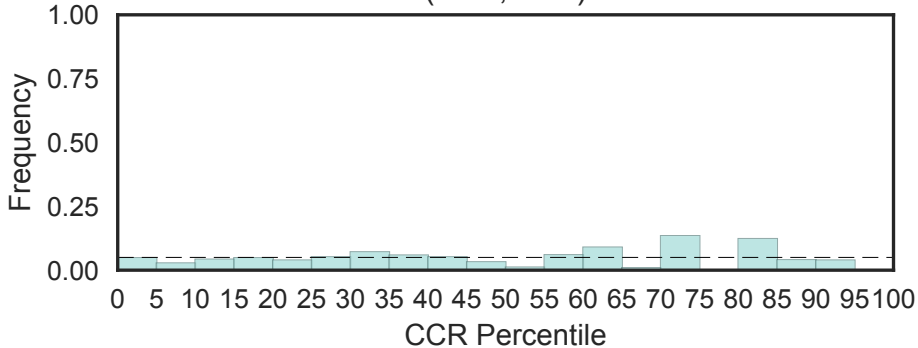

PCNA-associated factor  
(PAF, N=1)

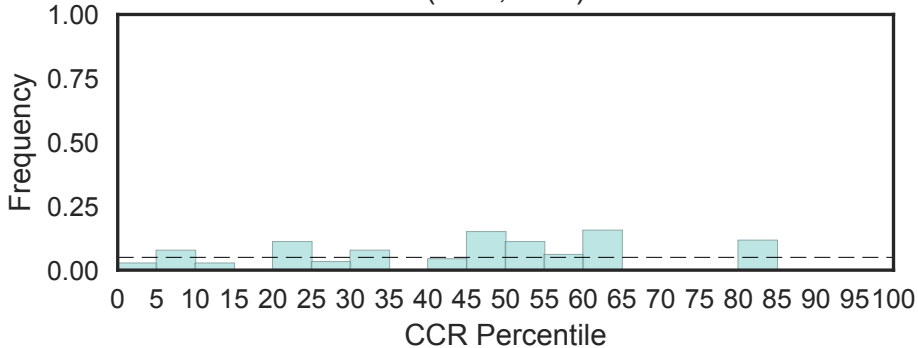

Platelet-activating factor acetylhydrolase, isoform II  
(PAF-AH\_p\_II, N=2)

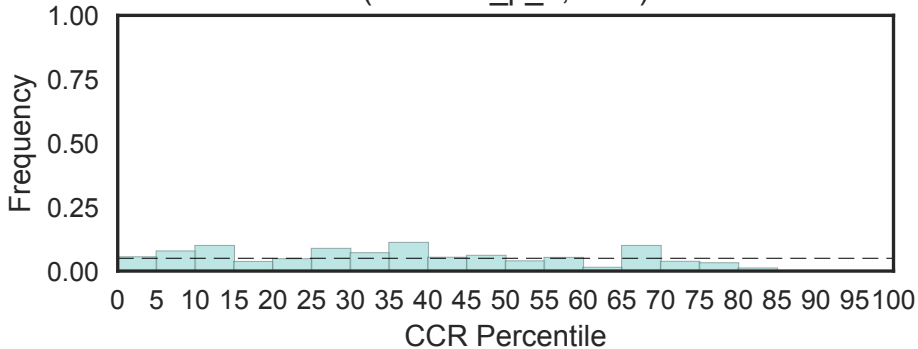

# Phosphoprotein associated with glycosphingolipid-enriched (PAG, N=1)

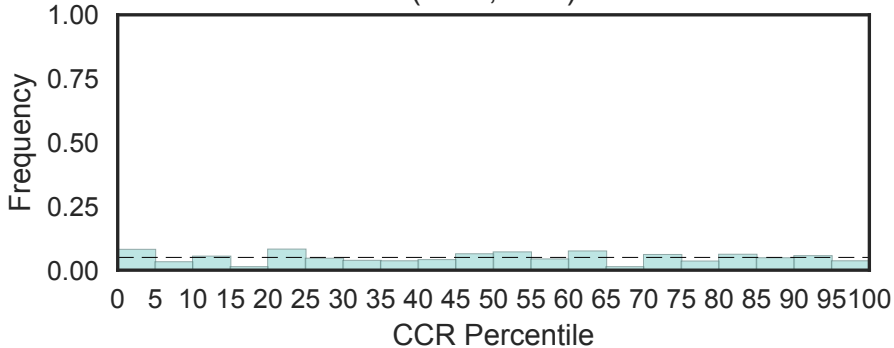



Paired amphipathic helix repeat  
(PAH, N=7)

Fisher's OR: 8.77; Bonferroni p-val: 0.604

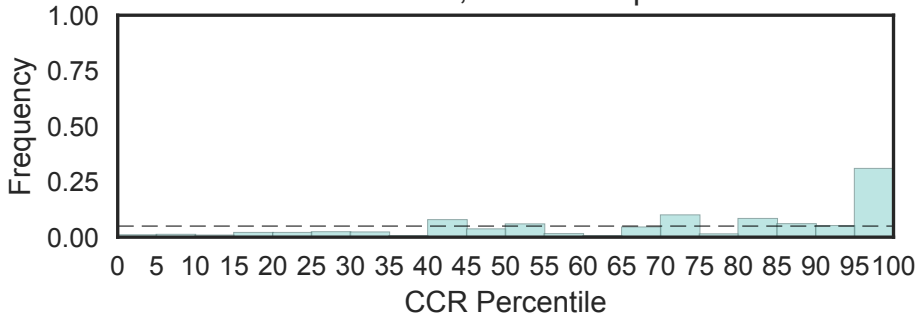

Partner and localizer of BRCA2 WD40 domain  
(PALB2\_WD40, N=1)

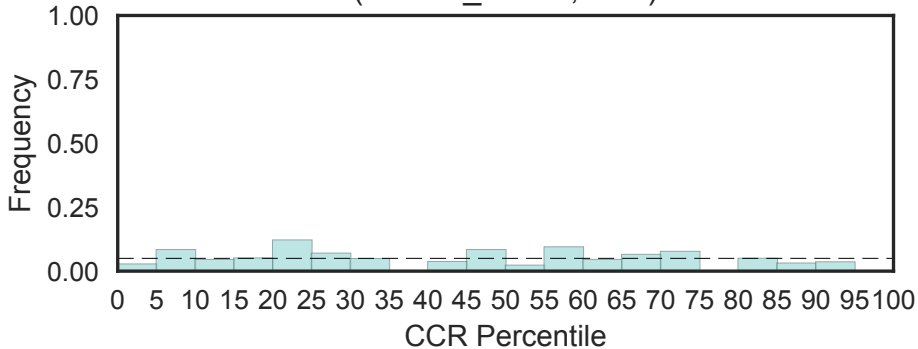

Pyridoxal-phosphate dependent enzyme  
(PALP, N=5)

Fisher's OR: 0; Bonferroni p-val: 1

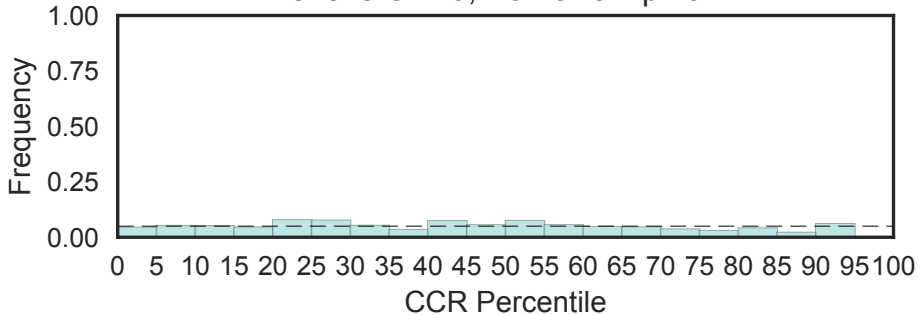

Ataxin-2 C-terminal region  
(PAM2, N=9)

Fisher's OR: 2.85; Bonferroni p-val: 1

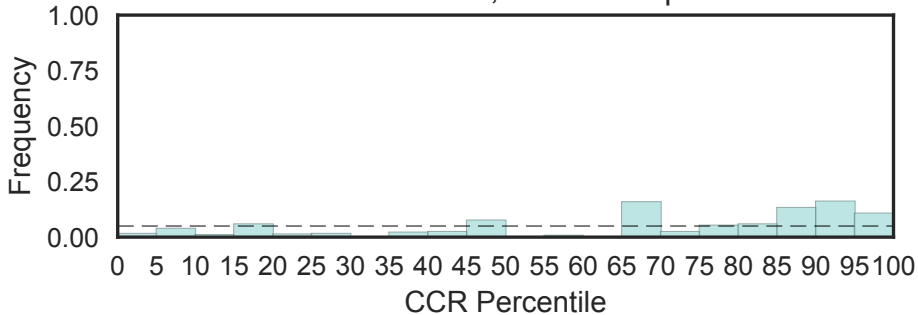

PAN domain  
(PAN\_1, N=13)  
Fisher's OR: 0; Bonferroni p-val: 1

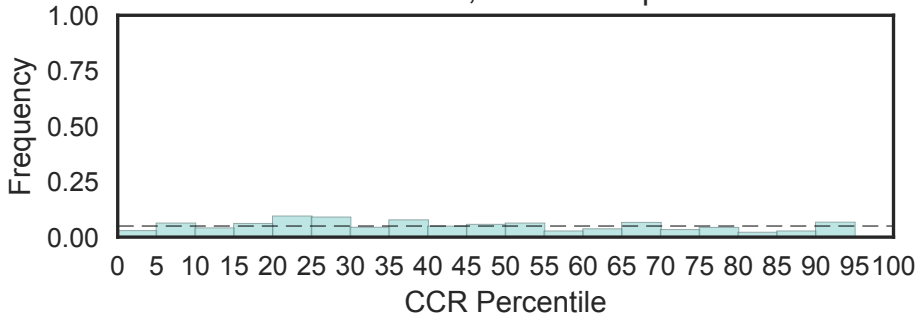

PAN domain  
(PAN\_4, N=17)

Fisher's OR: 0; Bonferroni p-val: 1

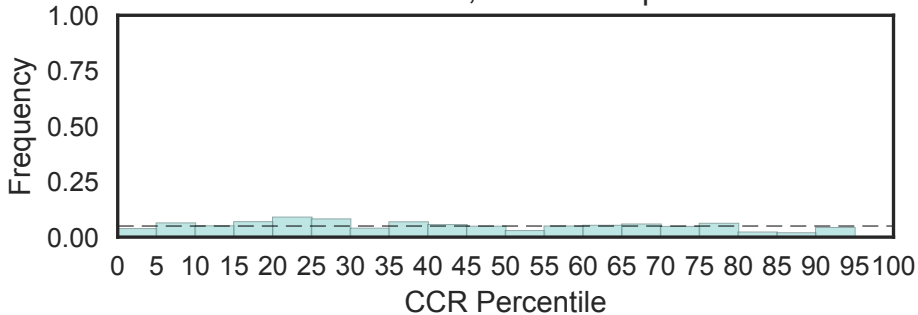

PAP2 superfamily  
(PAP2, N=20)

Fisher's OR: 0.218; Bonferroni p-val: 1

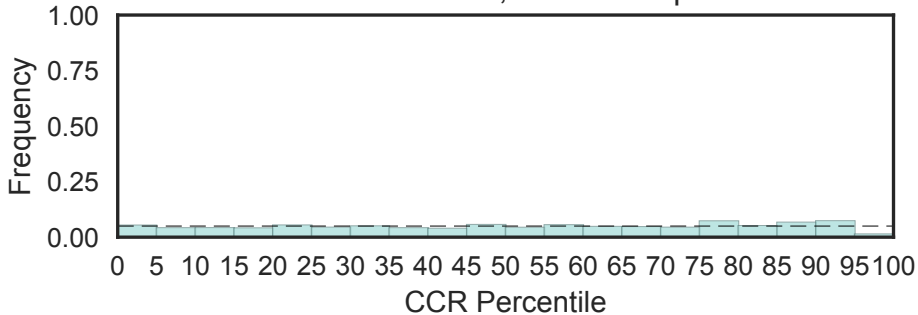

PAP2 superfamily  
(PAP2\_3, N=1)

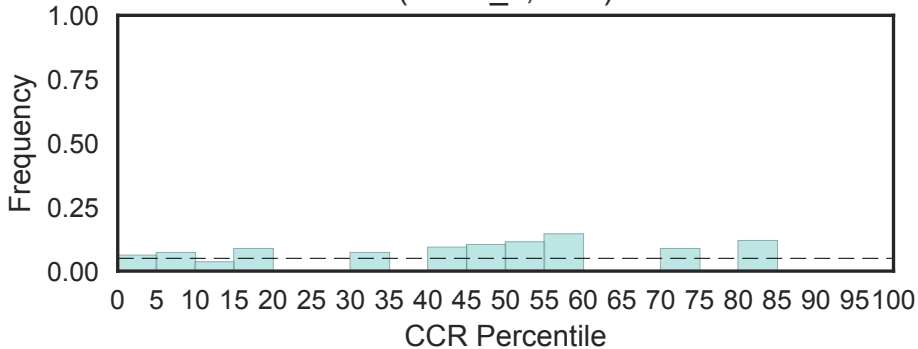



PAP2 superfamily C-terminal  
(PAP2\_C, N=3)

Fisher's OR: 1.93; Bonferroni p-val: 1

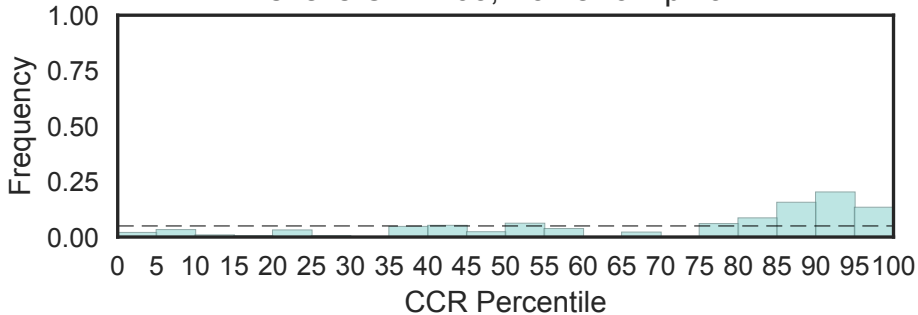

PAPA-1-like conserved region  
(PAPA-1, N=1)

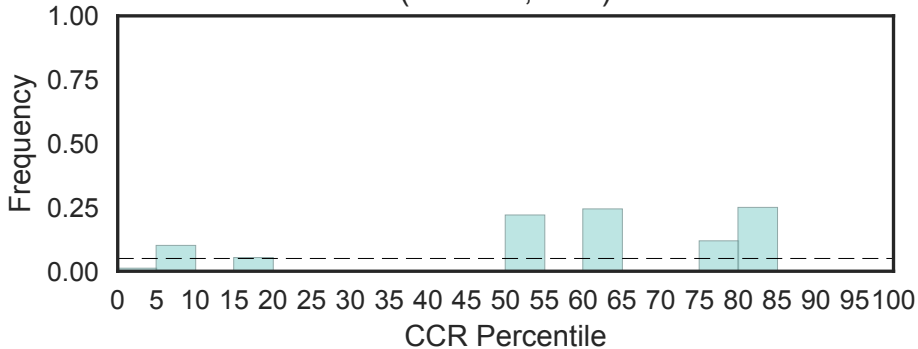

Phosphoadenosine phosphosulfate reductase family  
(PAPS\_reduct, N=2)

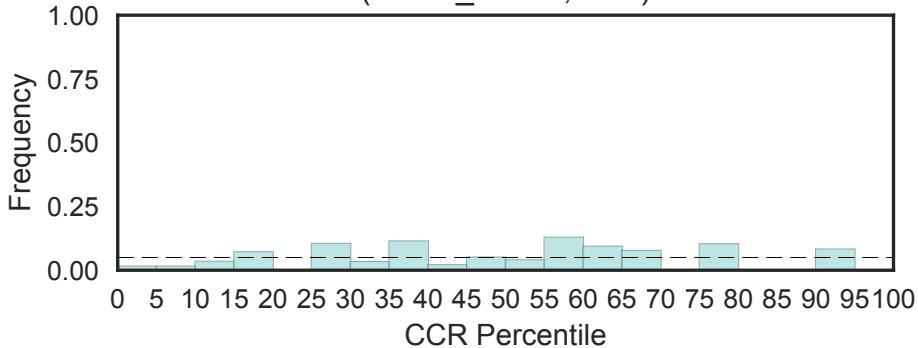

Poly(A) polymerase predicted RNA binding domain  
(PAP\_RNA-bind, N=3)

Fisher's OR: 4.33; Bonferroni p-val: 1

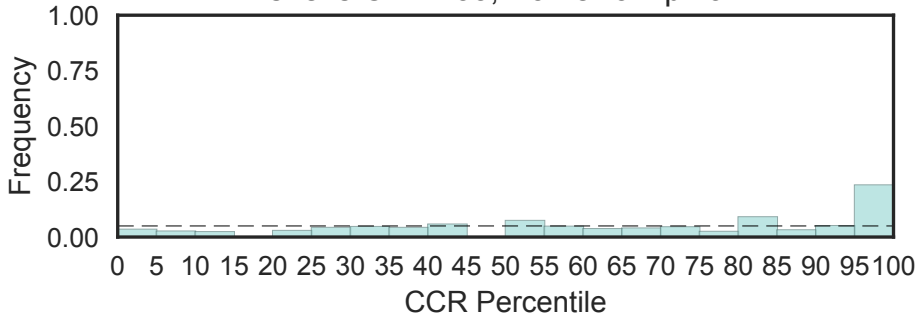

Cid1 family poly A polymerase  
(PAP\_assoc, N=9)

Fisher's OR: 8.4; Bonferroni p-val: 0.0576

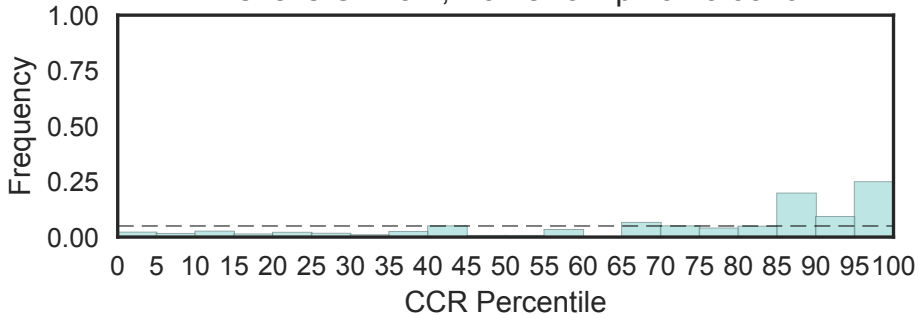

Poly(A) polymerase central domain  
(PAP\_central, N=4)

Fisher's OR: 5.74; Bonferroni p-val: 0.00253

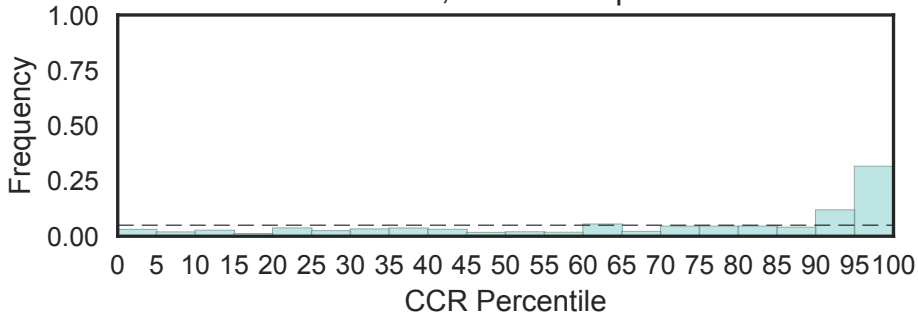

Poly (ADP-ribose) glycohydrolase (PARG)  
(PARG\_cat, N=3)

Fisher's OR: 0; Bonferroni p-val: 1

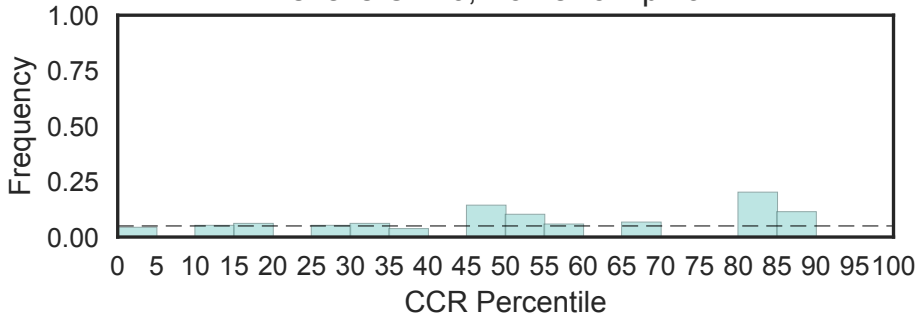

# PARM (PARM, N=1)

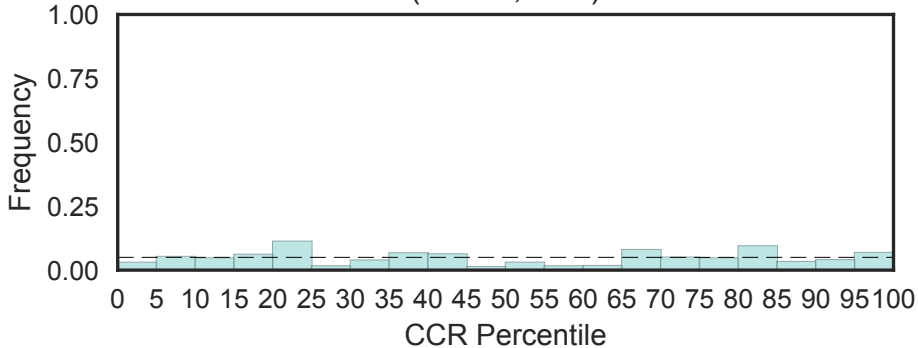



Poly(ADP-ribose) polymerase catalytic domain  
(PARP, N=16)

Fisher's OR: 1.24; Bonferroni p-val: 1

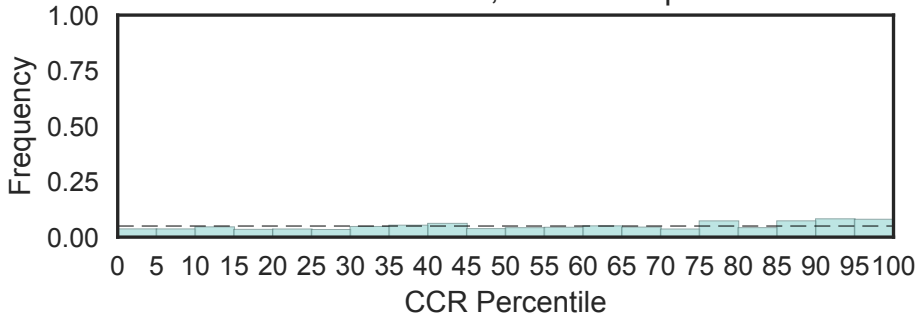

Poly(ADP-ribose) polymerase, regulatory domain  
(PARP\_reg, N=3)

Fisher's OR: 0; Bonferroni p-val: 1

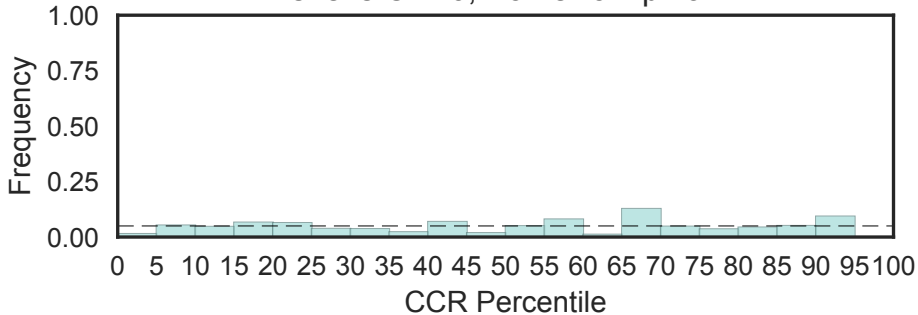

PAS fold  
(PAS, N=38)

Fisher's OR: 1.89; Bonferroni p-val: 1

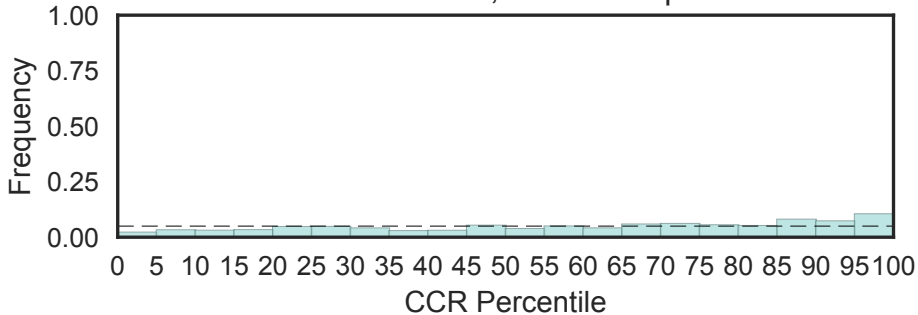

PAS domain  
(PAS\_11, N=21)

Fisher's OR: 2.18; Bonferroni p-val: 1

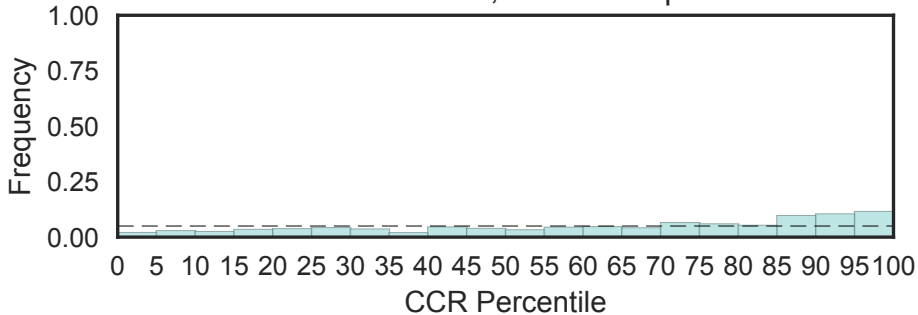

PAS fold  
(PAS\_2, N=2)

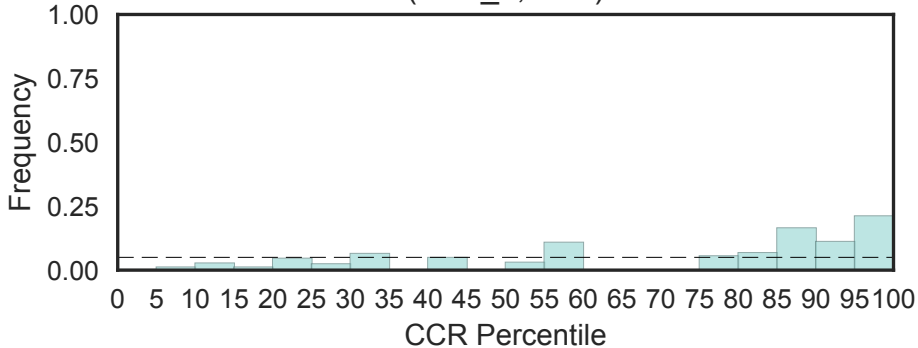

PAS fold  
(PAS\_3, N=24)

Fisher's OR: 1.62; Bonferroni p-val: 1

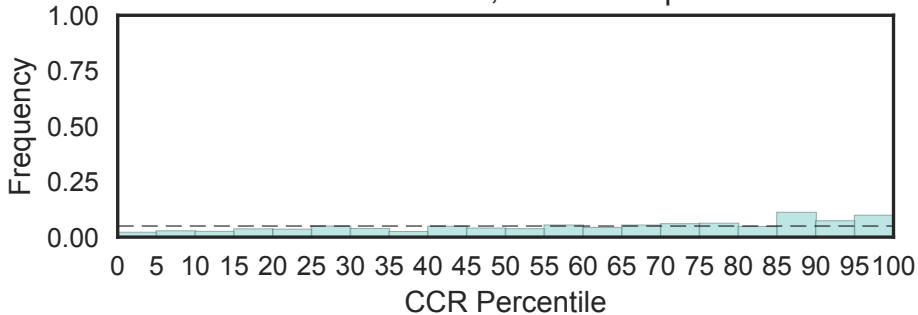

PAS fold  
(PAS\_4, N=5)

Fisher's OR: 1.34; Bonferroni p-val: 1

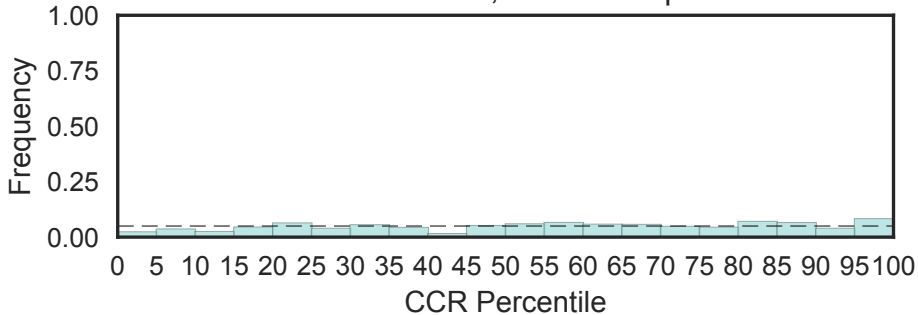

PAS domain  
(PAS\_8, N=6)

Fisher's OR: 1.5; Bonferroni p-val: 1

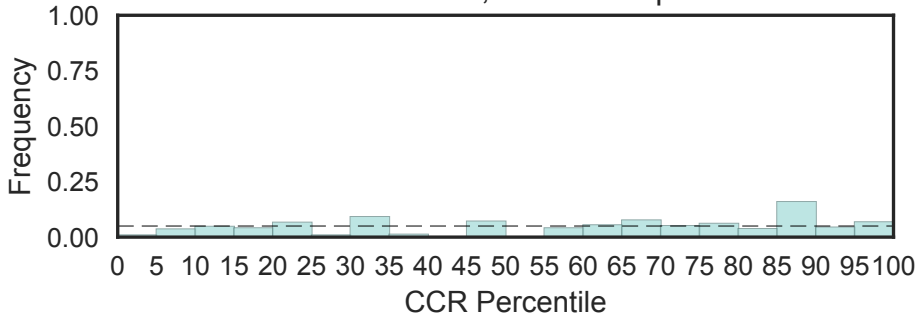



PAS domain  
(PAS\_9, N=36)

Fisher's OR: 1.78; Bonferroni p-val: 1

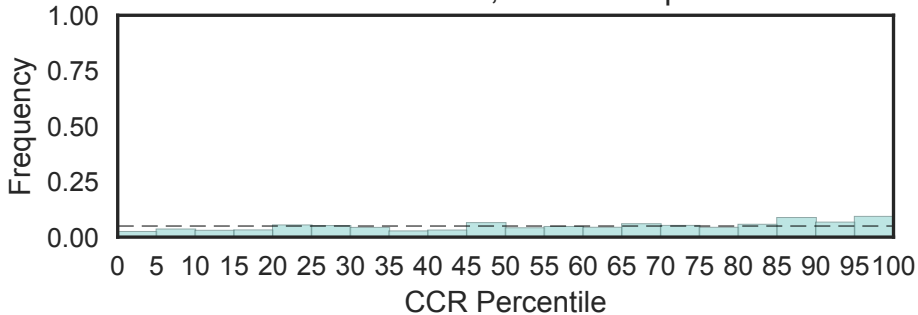

# Topoisomerase II-associated protein PAT1 (PAT1, N=2)

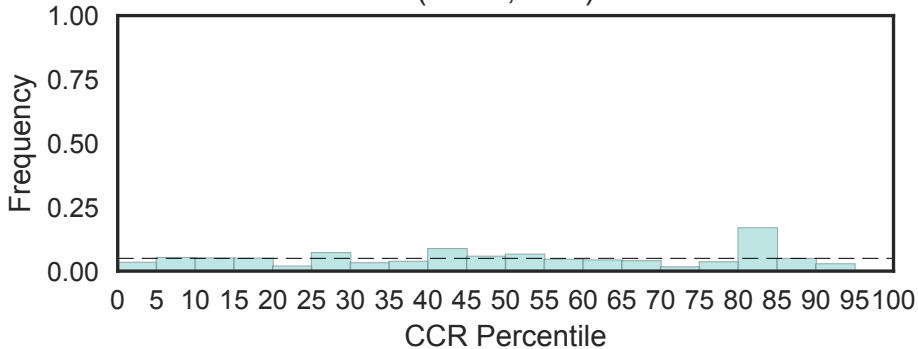

PNGase C-terminal domain, mannose-binding module PAW  
(PAW, N=1)

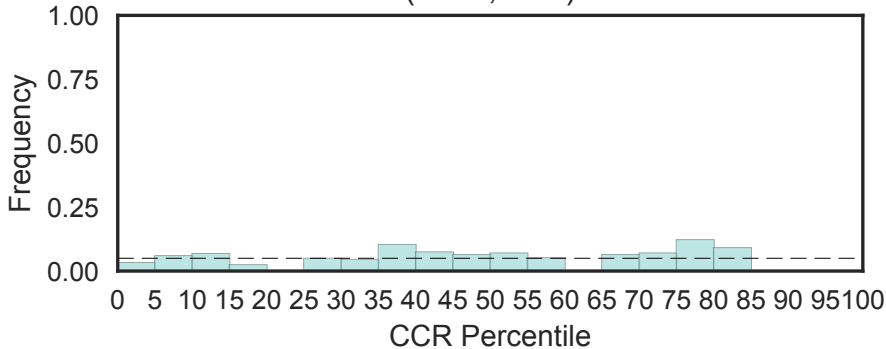

'Paired box' domain  
(PAX, N=9)

Fisher's OR: 4.45; Bonferroni p-val: 0.0892

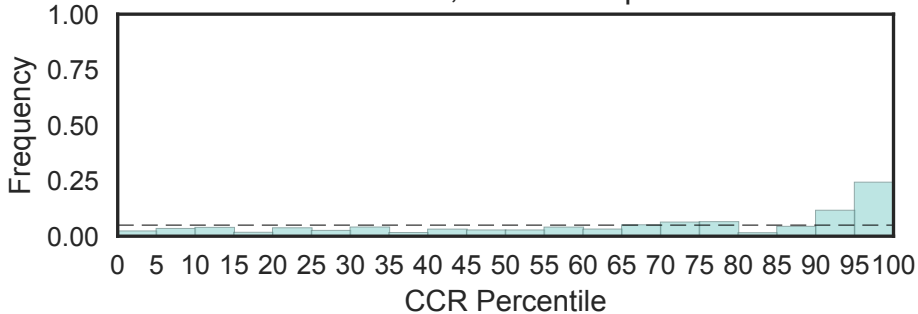

PAXIP1-associated-protein-1 C term PTIP binding protein  
(PAXIP1\_C, N=1)

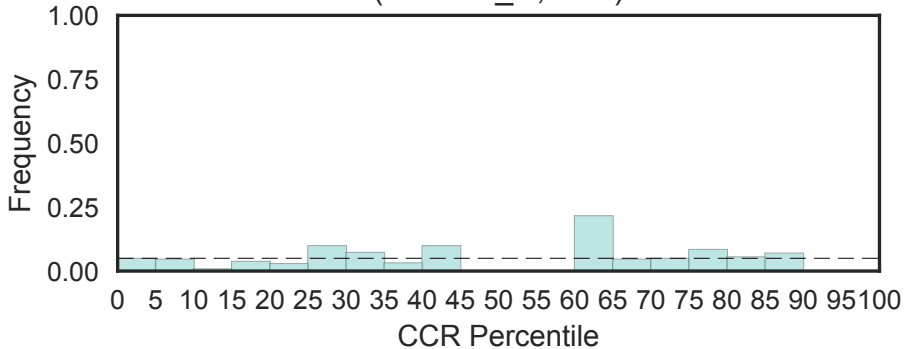

PAXNEB protein  
(PAXNEB, N=1)

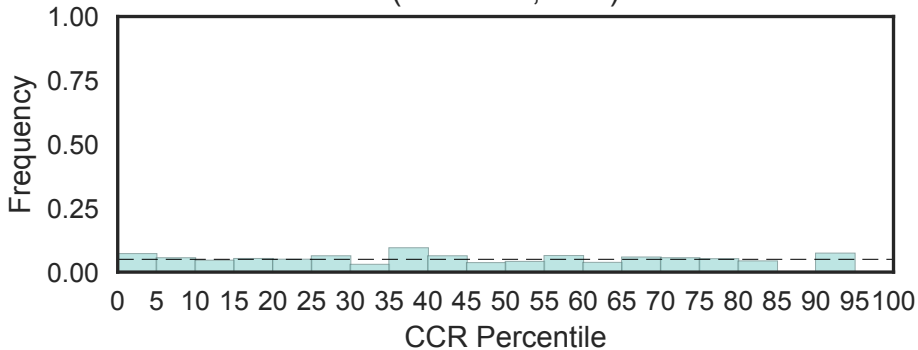

PAXX, PAralog of XRCC4 and XLF, also called C9orf142  
(PAXX, N=1)

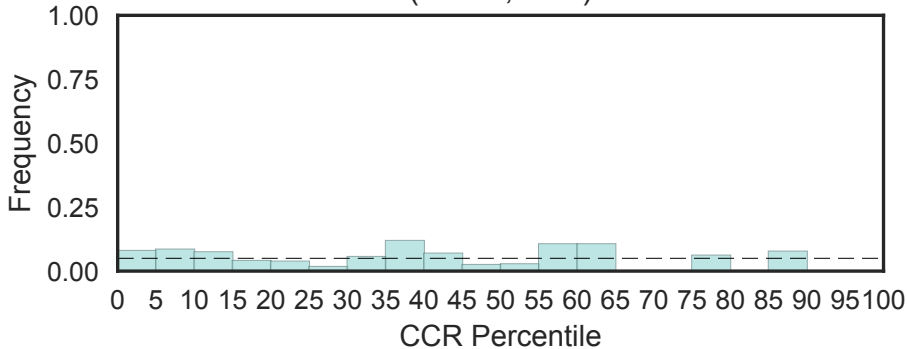

PAZ domain  
(PAZ, N=9)

Fisher's OR: 7.14; Bonferroni p-val: 7.83e-07

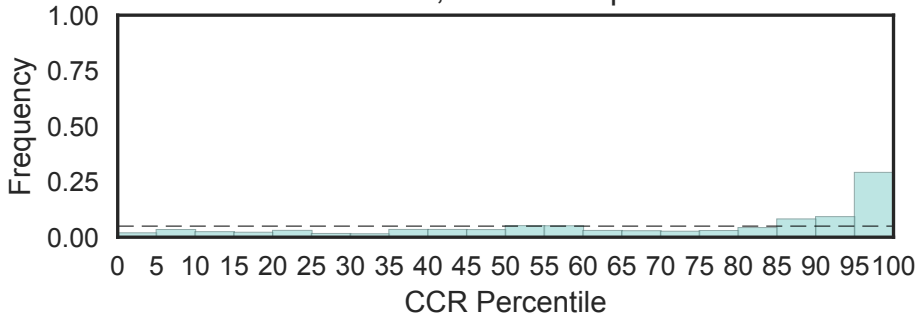



PB1 domain  
(PB1, N=14)

Fisher's OR: 0.303; Bonferroni p-val: 1

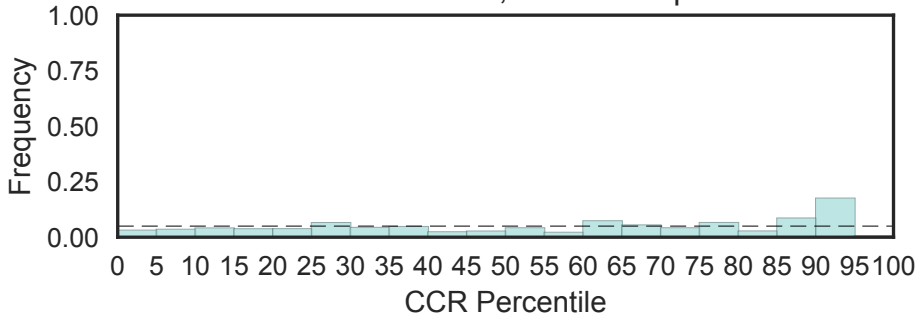

PBC domain  
(PBC, N=4)

Fisher's OR: 2.85; Bonferroni p-val: 1

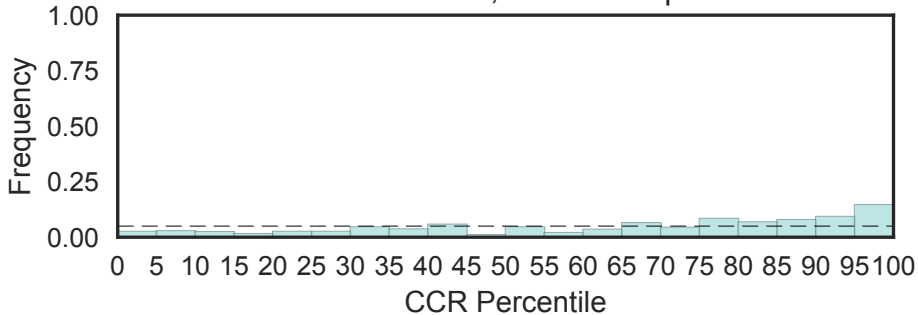

P21-Rho-binding domain  
(PBD, N=12)

Fisher's OR: 6.15; Bonferroni p-val: 0.0626

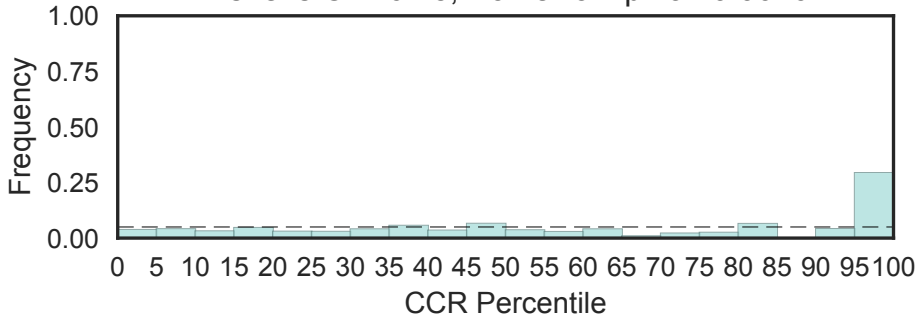

Phosphatidylethanolamine-binding protein  
(PBP, N=3)

Fisher's OR: 0; Bonferroni p-val: 1

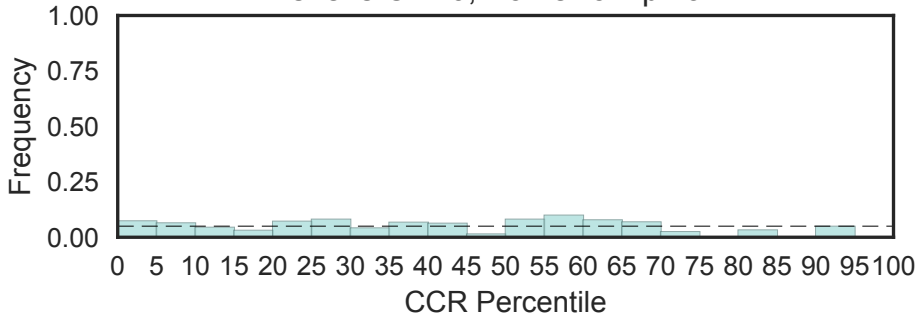

Proacrosin binding protein sp32  
(PBP\_sp32, N=1)

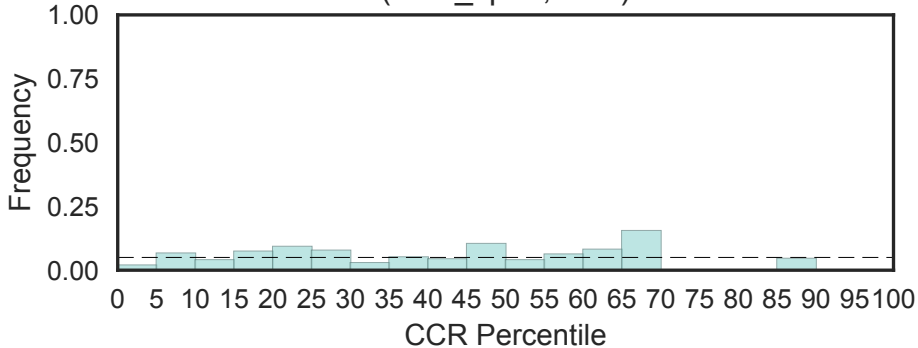

# GDSL/SGNH-like Acyl-Esterase family found in Pmr5 and Cas1p (PC-Esterase, N=1)

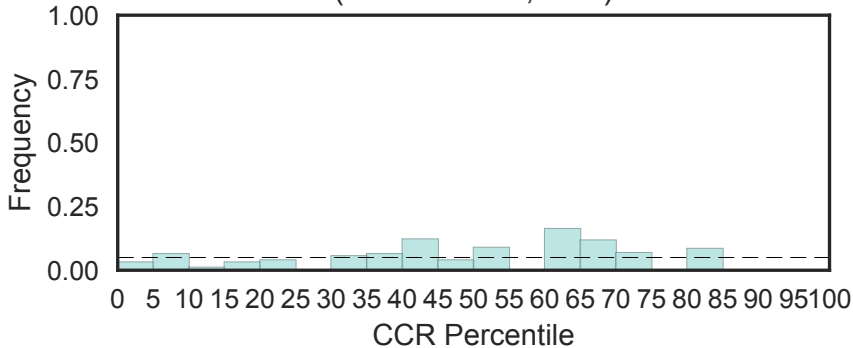

Transcriptional Coactivator p15 (PC4)  
(PC4, N=1)

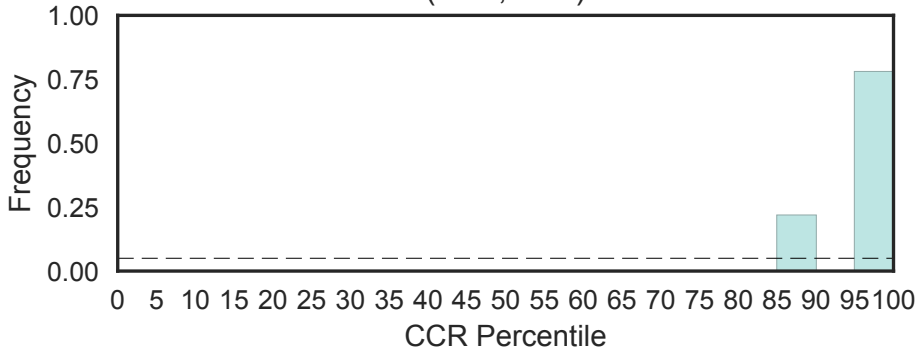

PCAF (P300/CBP-associated factor) N-terminal domain  
(PCAF\_N, N=3)

Fisher's OR: 2.35; Bonferroni p-val: 1

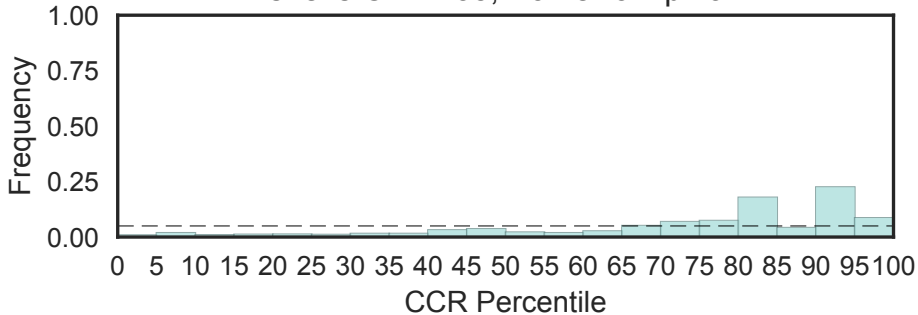



PCI domain  
(PCI, N=17)

Fisher's OR: 3.19; Bonferroni p-val: 1

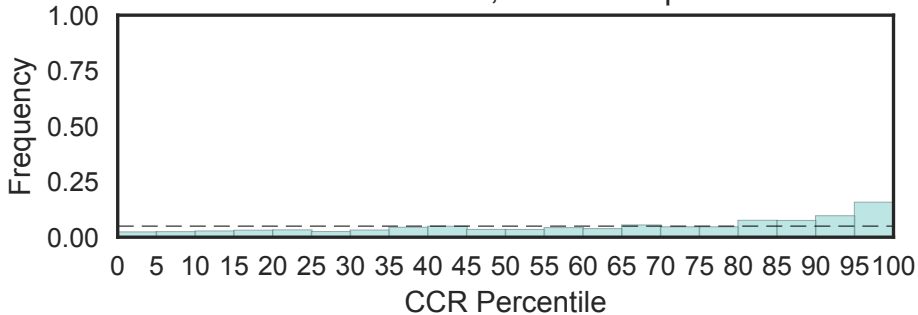

Phosphorylated CTD interacting factor 1 WW domain  
(PCIF1\_WW, N=1)

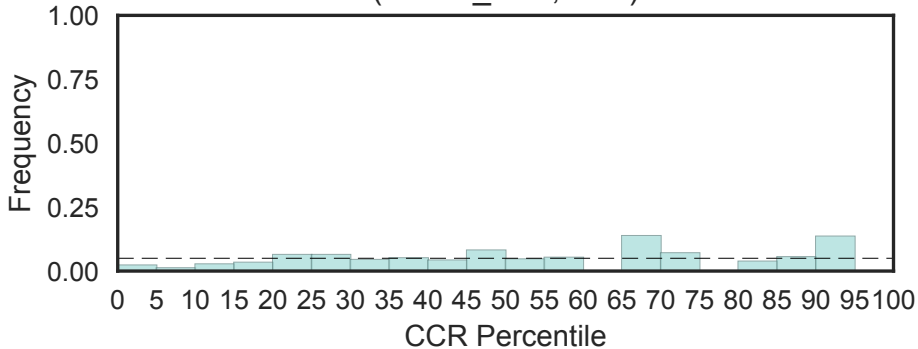

Pericentriolar material 1 C terminus  
(PCM1\_C, N=1)

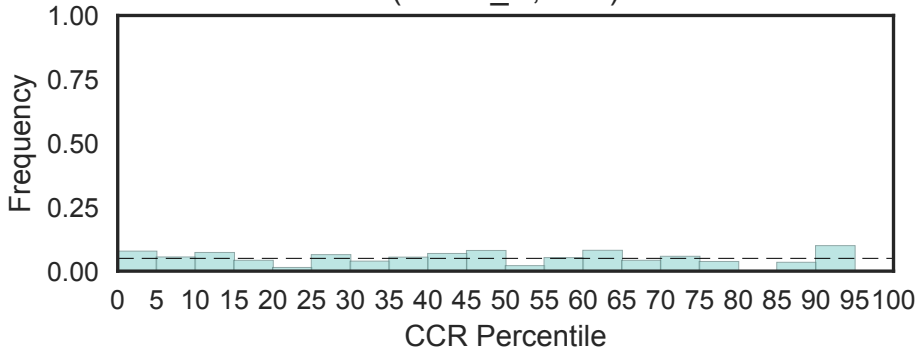

Protein-L-isoaspartate(D-aspartate) O-methyltransferase (PCMT)  
(PCMT, N=6)

Fisher's OR: 2.17; Bonferroni p-val: 1

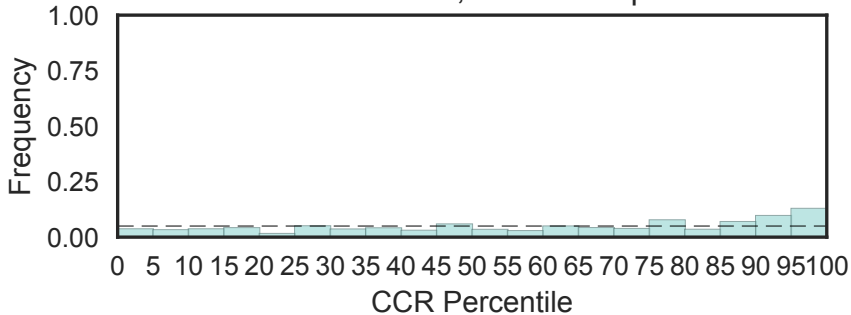

Proliferating cell nuclear antigen, C-terminal domain  
(PCNA\_C, N=1)

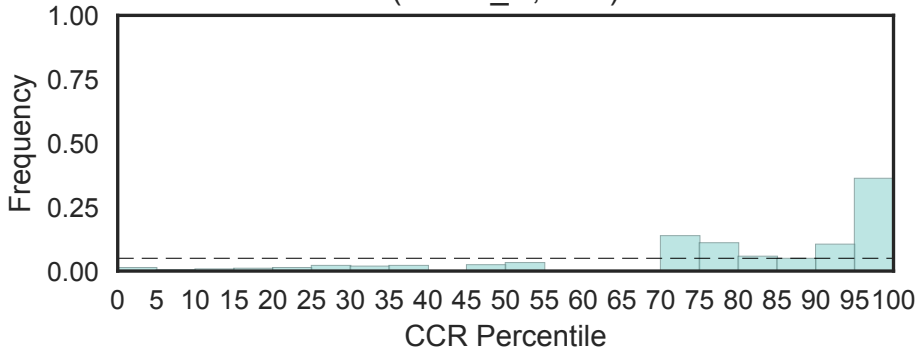

Proliferating cell nuclear antigen, N-terminal domain  
(PCNA\_N, N=1)

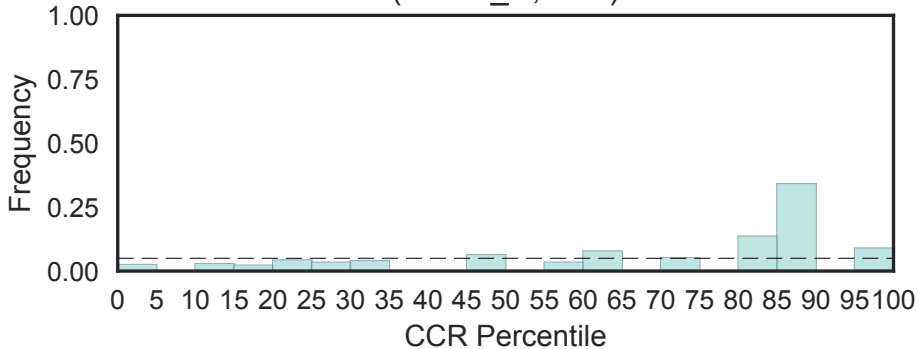

PEST, proteolytic signal-containing nuclear protein family  
(PCNP, N=1)

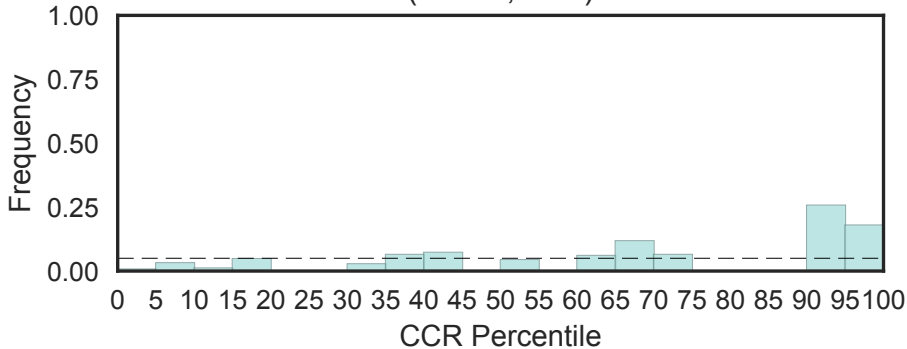

PCO\_ADO  
(PCO\_ADO, N=2)

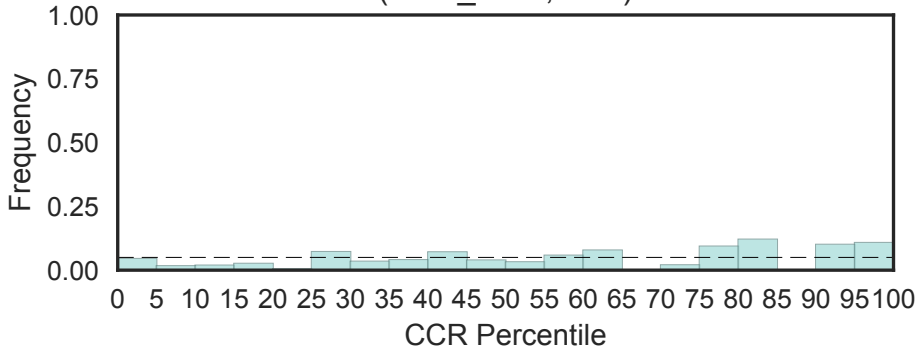



PCRF domain  
(PCRF, N=2)

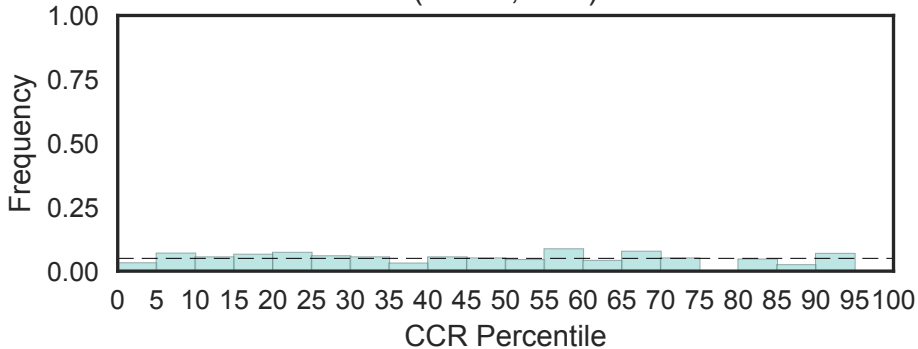

Proteasome/cyclosome repeat  
(PC\_rep, N=6)

Fisher's OR: 5.07; Bonferroni p-val: 1

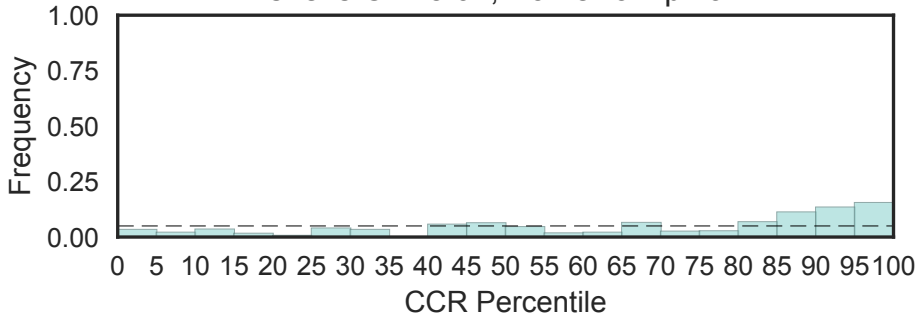

POU domain, class 2, associating factor 1  
(PD-C2-AF1, N=1)

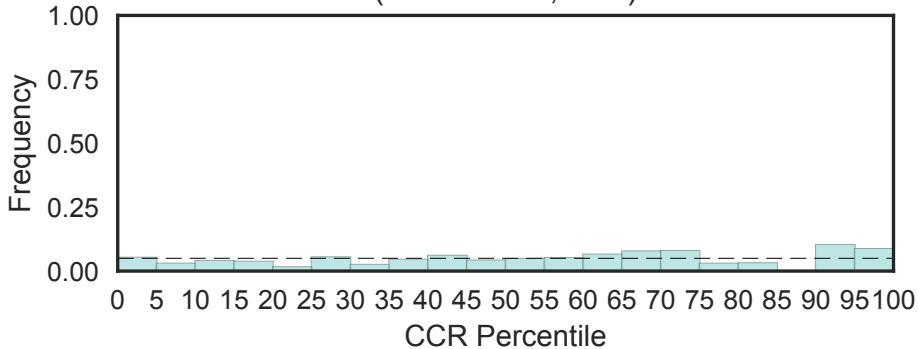

WD40-like Beta Propeller Repeat  
(PD40, N=6)

Fisher's OR: 12.7; Bonferroni p-val: 1

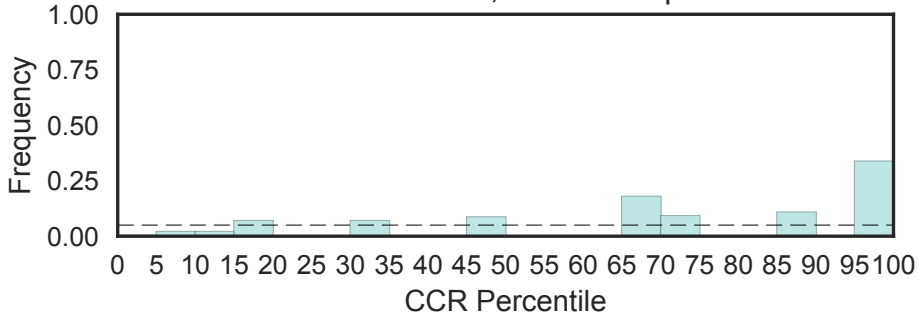

Programmed cell death protein 2, C-terminal putative domain  
(PDCD2\_C, N=2)

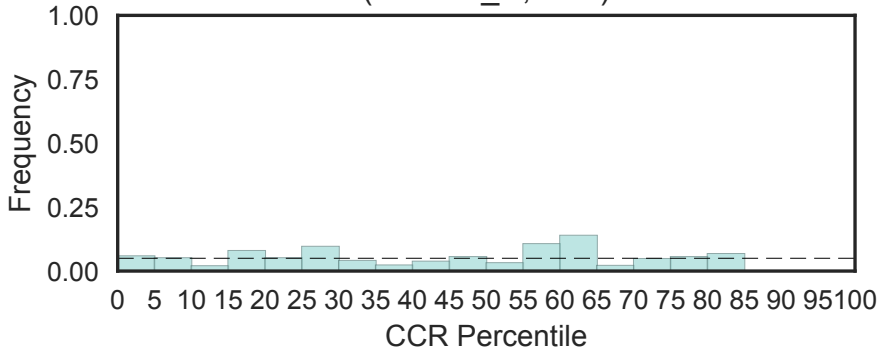

Programmed cell death protein 7  
(PDCD7, N=1)

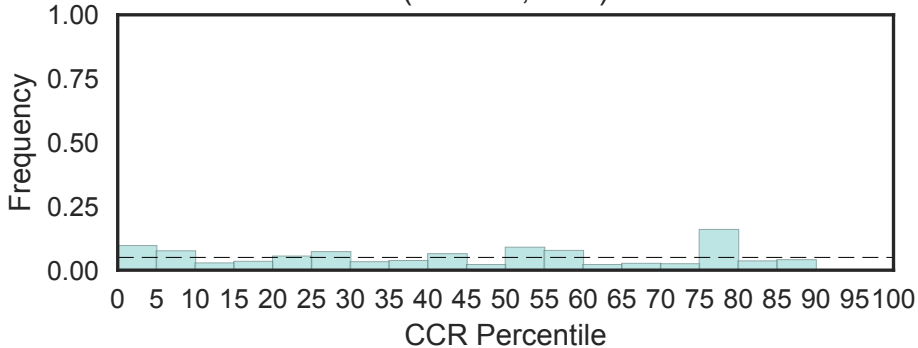

Mitochondrial 28S ribosomal protein S30 (PDCD9)  
(PDCD9, N=2)

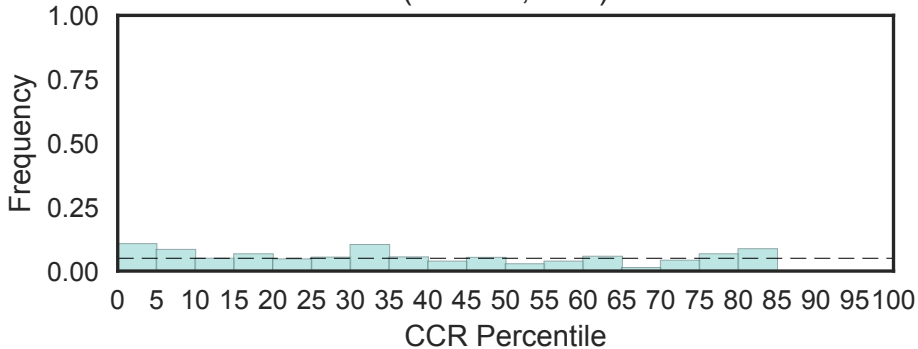

PD-(D/E)XK nuclease superfamily  
(PDDEXK\_1, N=3)

Fisher's OR: 0; Bonferroni p-val: 1

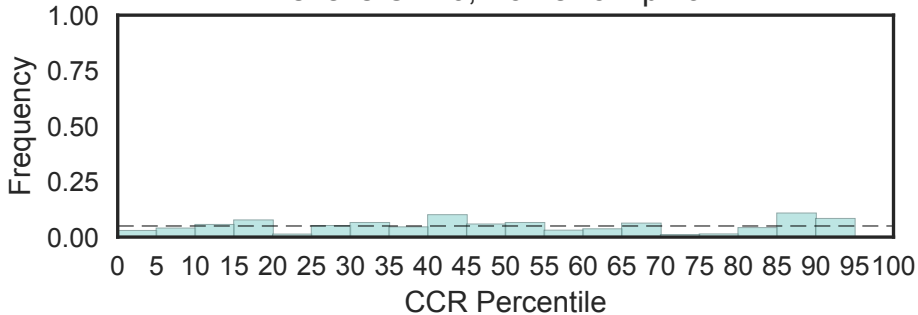



Retinal cGMP phosphodiesterase, gamma subunit  
(PDE6\_gamma, N=2)

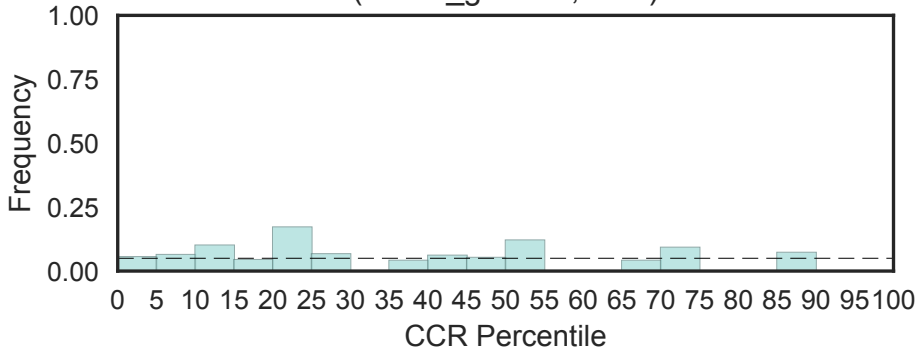

PDE8 phosphodiesterase  
(PDE8, N=1)

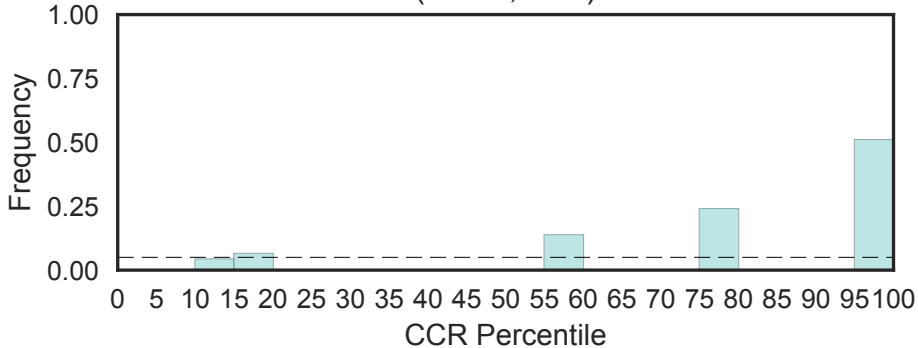

3'5'-cyclic nucleotide phosphodiesterase  
(PDEase\_I, N=22)

Fisher's OR: 1.93; Bonferroni p-val: 1

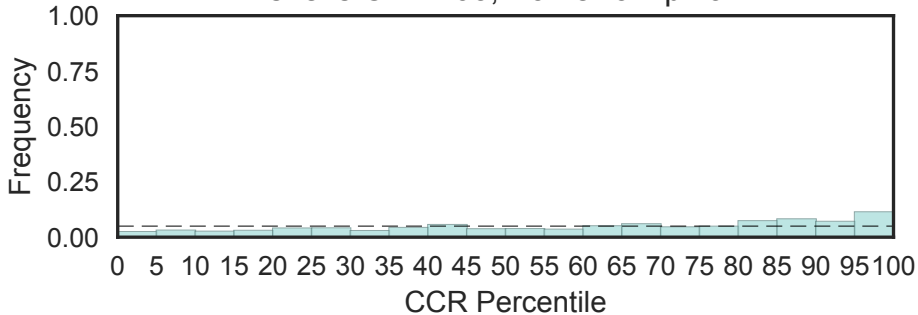

3'5'-cyclic nucleotide phosphodiesterase N-terminal  
(PDEase\_I\_N, N=3)

Fisher's OR: 4.6; Bonferroni p-val: 1

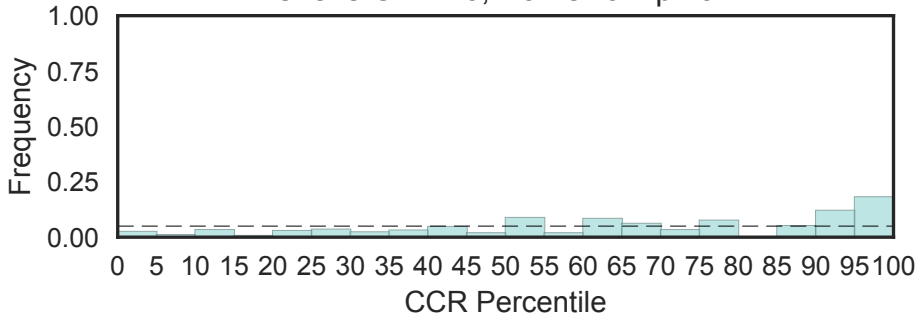

PDGF/VEGF domain  
(PDGF, N=9)

Fisher's OR: 0.45; Bonferroni p-val: 1

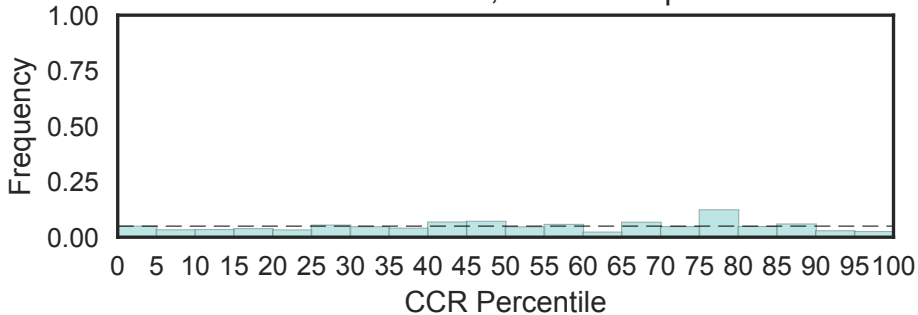

Platelet-derived growth factor, N terminal region  
(PDGF\_N, N=2)

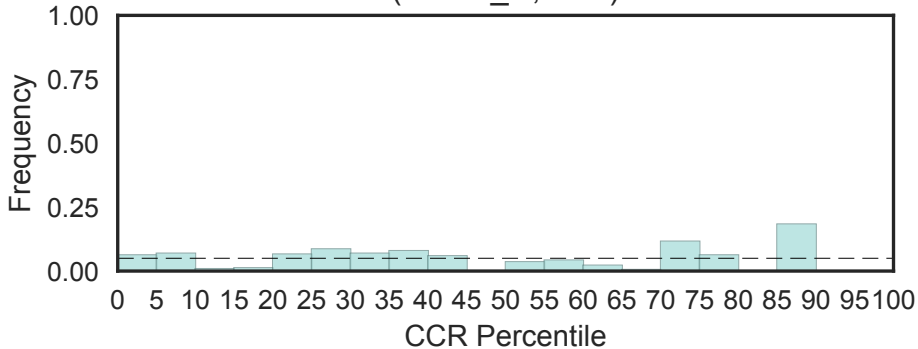

PDZ domain (Also known as DHR or GLGF)  
(PDZ, N=215)

Fisher's OR: 1.01; Bonferroni p-val: 1

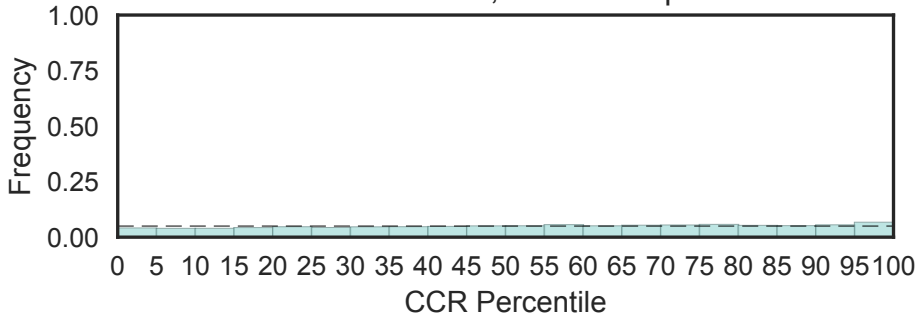

PDZ domain  
(PDZ\_2, N=31)

Fisher's OR: 0.954; Bonferroni p-val: 1

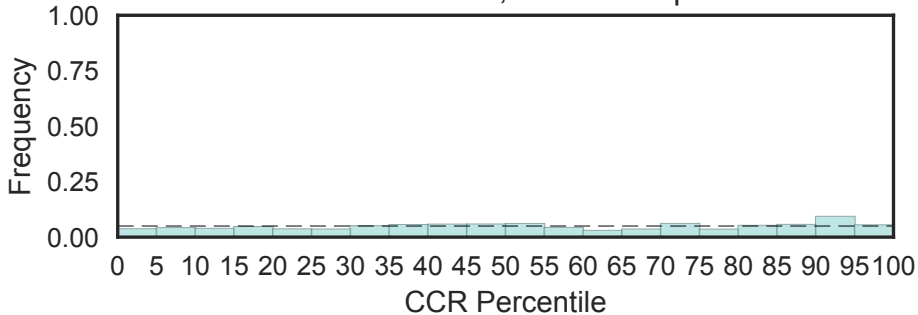



PDZ-associated domain of NMDA receptors  
(PDZ\_assoc, N=3)

Fisher's OR: 0; Bonferroni p-val: 1

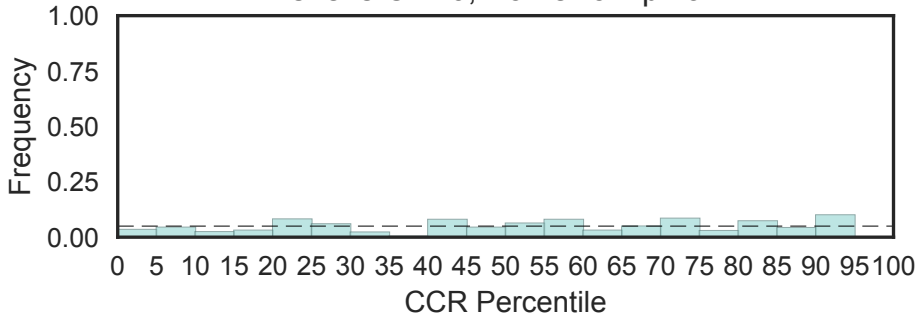

PEHE domain  
(PEHE, N=3)

Fisher's OR: 5.69; Bonferroni p-val: 1

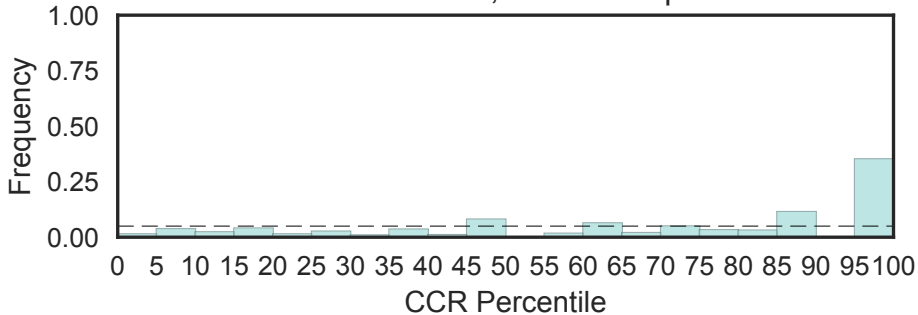

# Phospholipid methyltransferase (PEMT, N=2)

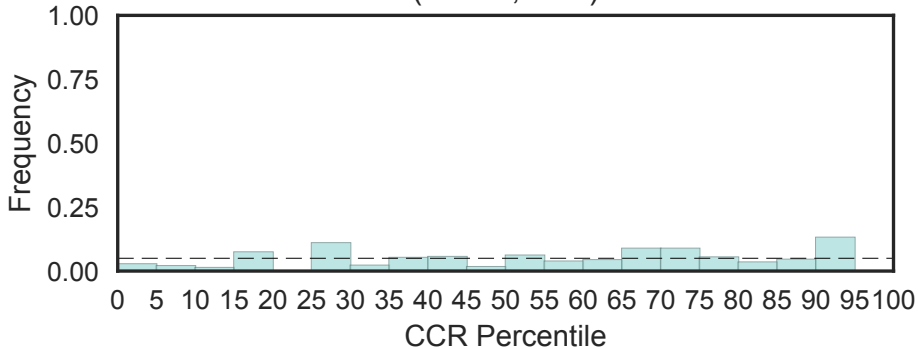

Presenilin enhancer-2 subunit of gamma secretase  
(PEN-2, N=1)

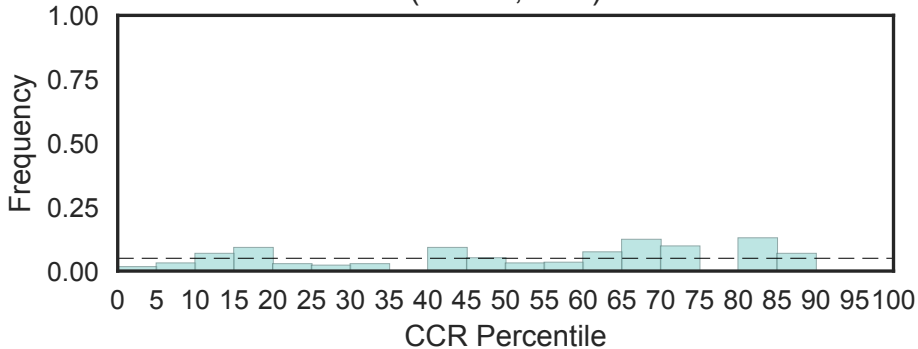

Phosphoenolpyruvate carboxykinase C-terminal P-loop domain  
(PEPCK\_C, N=3)

Fisher's OR: 0; Bonferroni p-val: 1

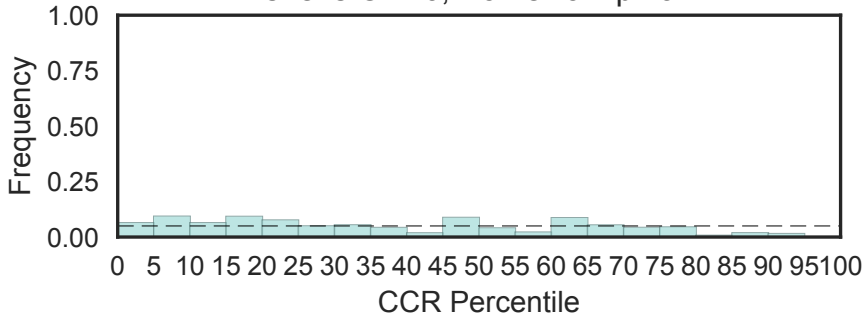

Phosphoenolpyruvate carboxykinase N-terminal domain  
(PEPCK\_N, N=2)

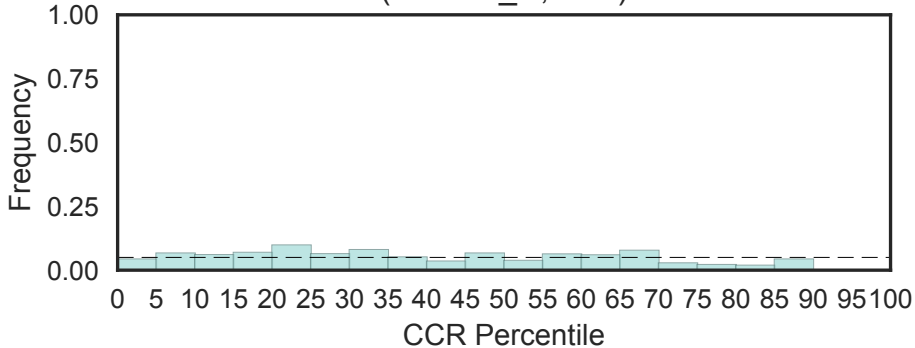

PET Domain  
(PET, N=5)

Fisher's OR: 0.761; Bonferroni p-val: 1

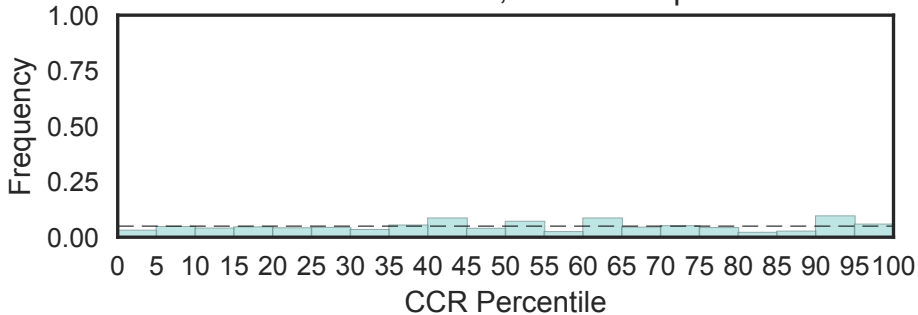

PET assembly of cytochrome c oxidase, mitochondrial  
(PET117, N=1)

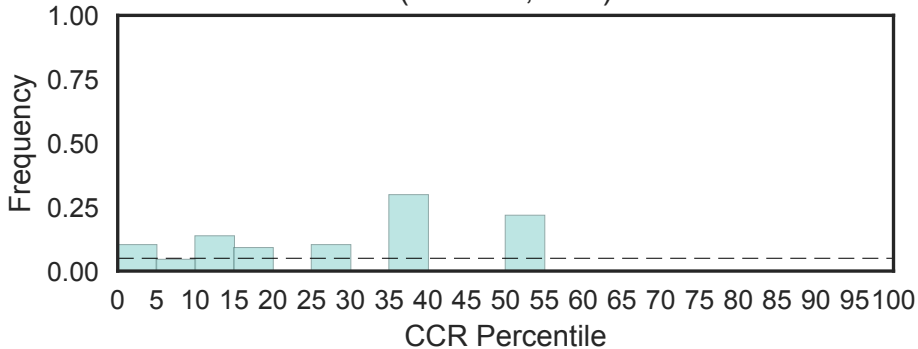



Peroxisome biogenesis factor 1, N-terminal  
(PEX-1N, N=1)

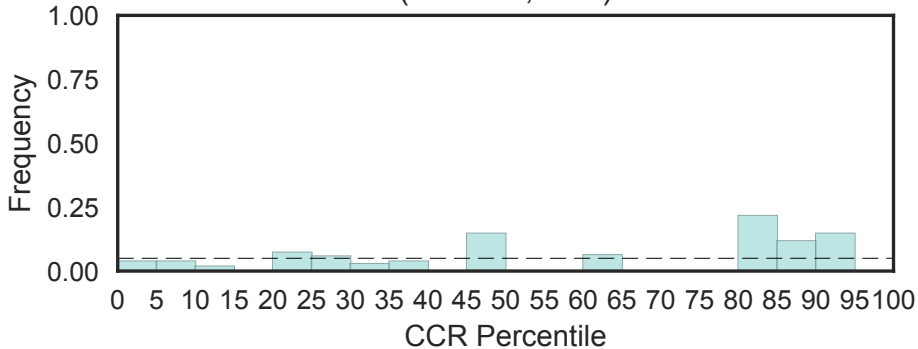

Peroxisome biogenesis factor 1, N-terminal  
(PEX-2N, N=1)

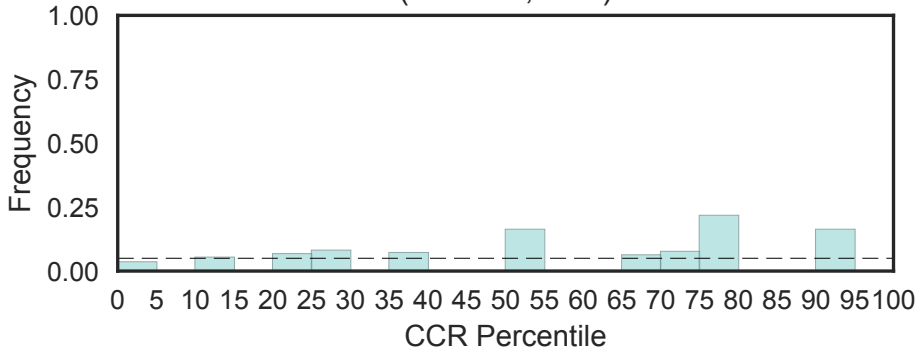

Peroxisomal biogenesis factor 11 (PEX11)  
(PEX11, N=3)

Fisher's OR: 0; Bonferroni p-val: 1

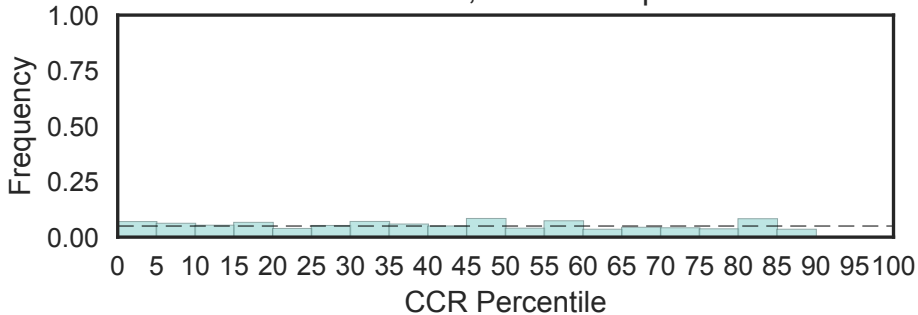

Phosphofructokinase  
(PFK, N=6)

Fisher's OR: 0.451; Bonferroni p-val: 1

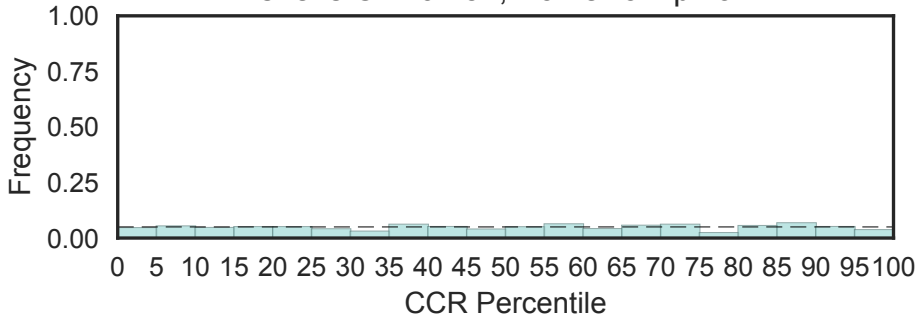

PFU (PLAA family ubiquitin binding)  
(PFU, N=1)

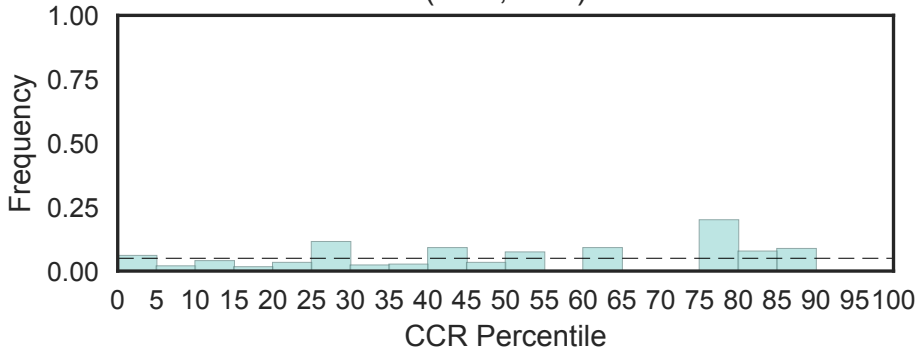

PGAP1-like protein  
(PGAP1, N=3)

Fisher's OR: 2.98; Bonferroni p-val: 1

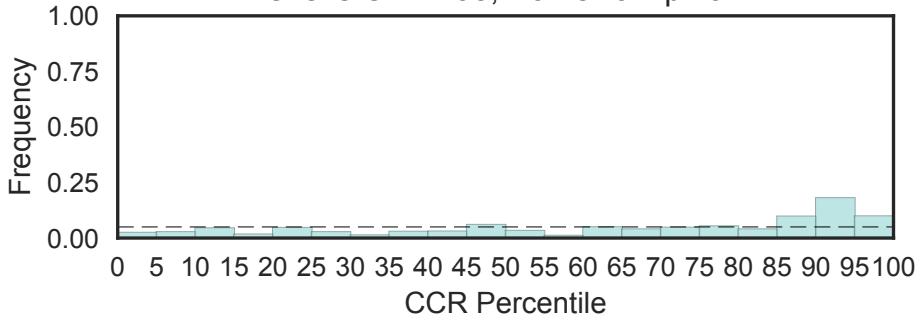

PGC7/Stella/Dppa3 domain  
(PGC7\_Stella, N=1)

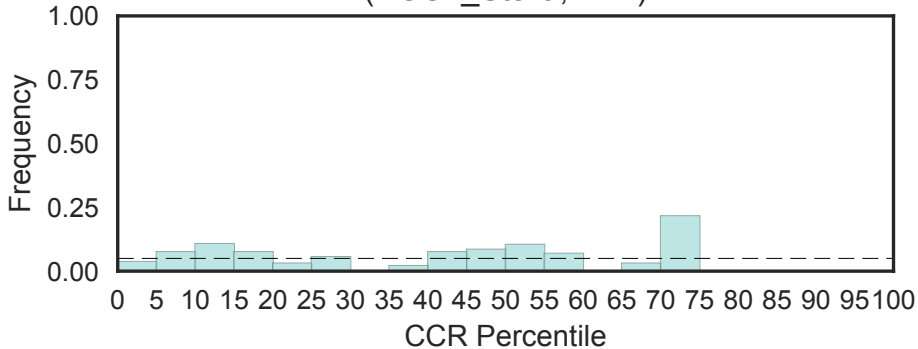

# Phosphoglucose isomerase (PGI, N=2)

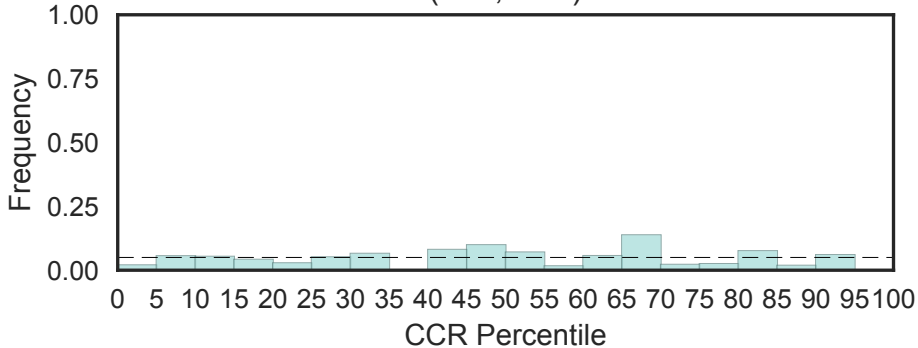



# Phosphoglycerate kinase (PGK, N=1)

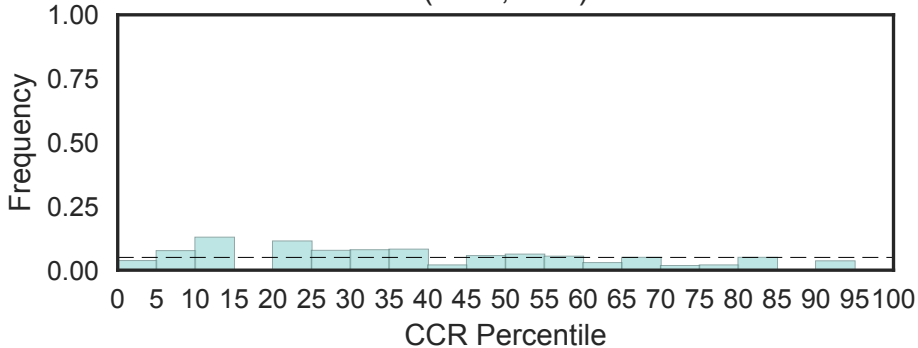

Phosphoglucomutase/phosphomannomutase, alpha/beta/alpha domain I  
(PGM\_PMM\_I, N=6)

Fisher's OR: 0; Bonferroni p-val: 1

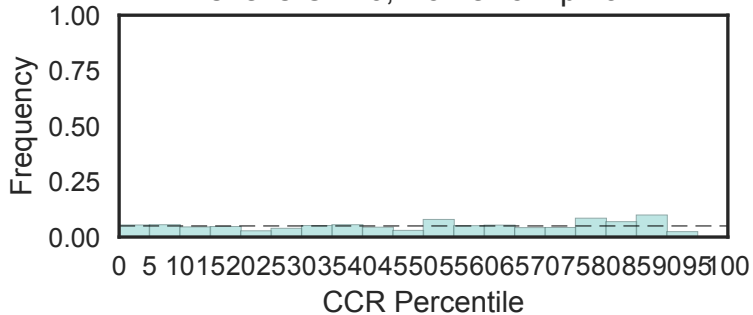

Phosphoglucomutase/phosphomannomutase, alpha/beta/alpha domain II  
(PGM\_PMM\_II, N=4)

Fisher's OR: 1.05; Bonferroni p-val: 1

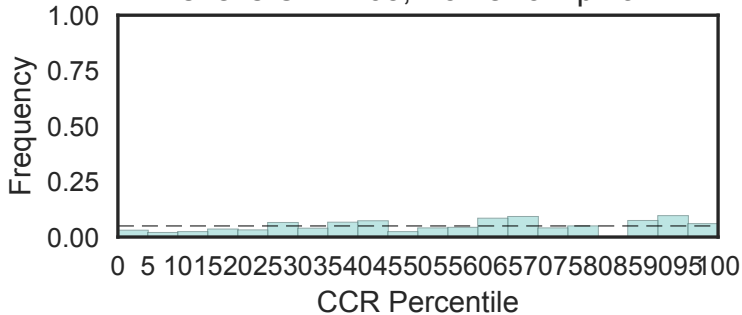

Phosphoglucomutase/phosphomannomutase, alpha/beta/alpha domain III  
(PGM\_PMM\_III, N=4)

Fisher's OR: 0; Bonferroni p-val: 1

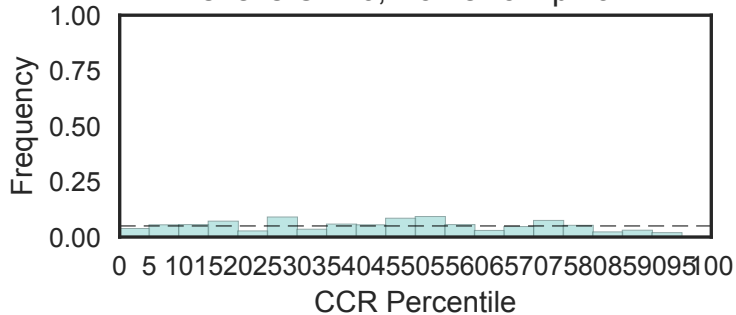

Phosphoglucomutase/phosphomannomutase, C-terminal domain  
(PGM\_PMM\_IV, N=4)

Fisher's OR: 1.07; Bonferroni p-val: 1

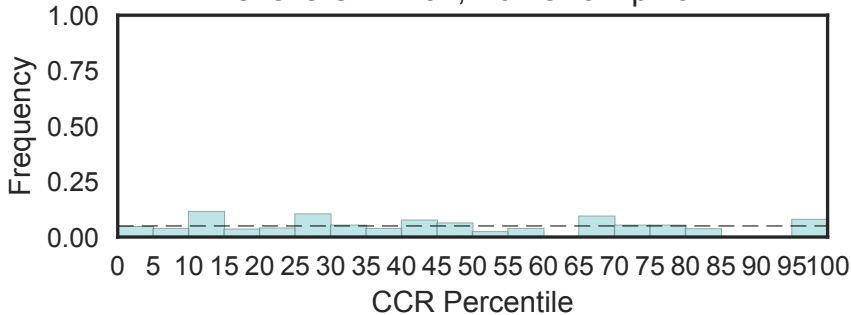

Putative peptidoglycan binding domain  
(PG\_binding\_1, N=19)

Fisher's OR: 0.257; Bonferroni p-val: 1

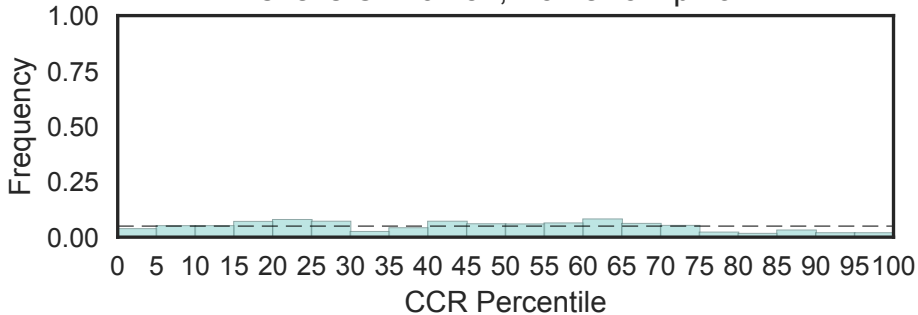

PH domain  
(PH, N=215)

Fisher's OR: 1.26; Bonferroni p-val: 1

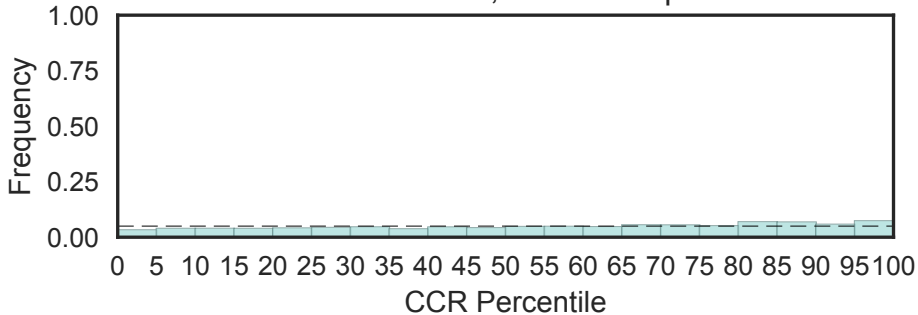

# Unstructured region on Polyhomeotic-like protein 1 and 2 (PHC2\_SAM\_assoc, N=2)

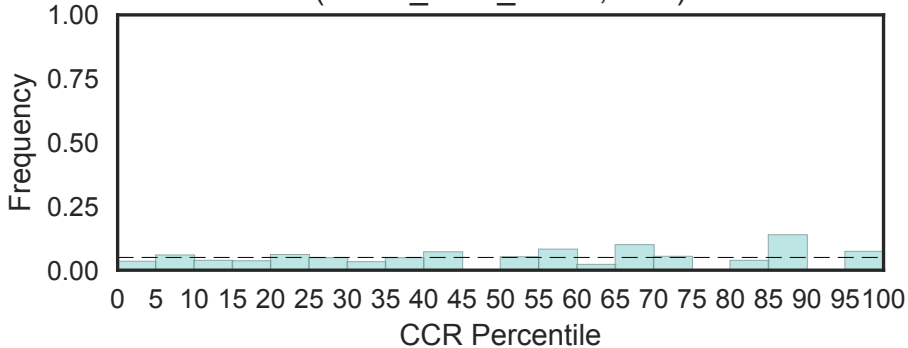



PHD-finger  
(PHD, N=69)

Fisher's OR: 6.93; Bonferroni p-val: 3.88e-20

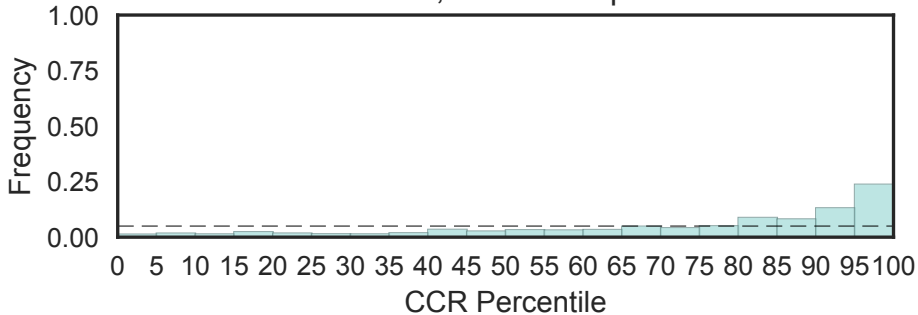

PHD finger protein 20-like protein 1  
(PHD20L1\_u1, N=1)

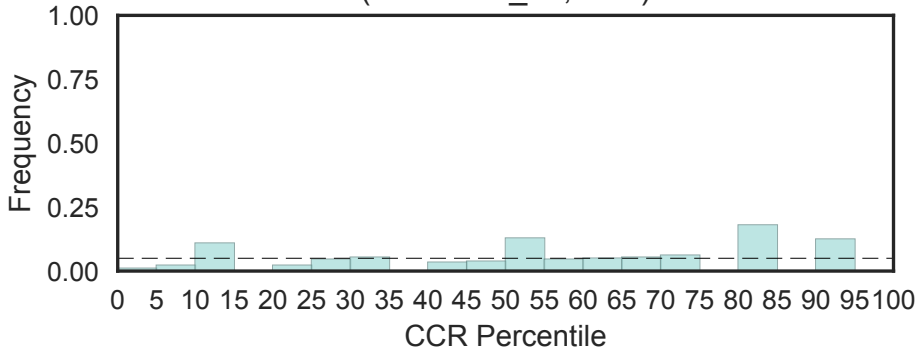

PHD-finger  
(PHD\_2, N=11)

Fisher's OR: 10.8; Bonferroni p-val: 0.204

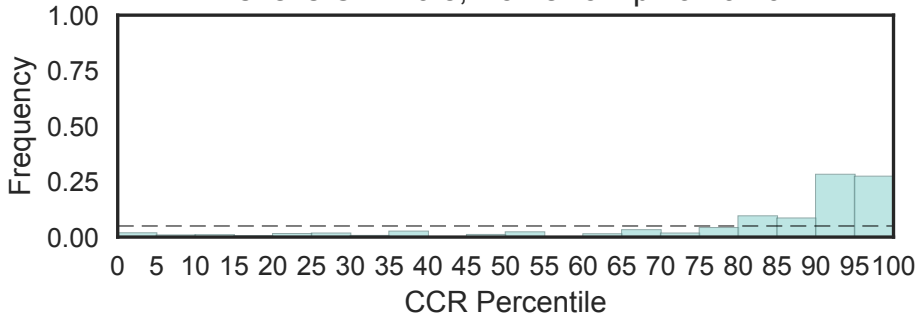

PHD domain of transcriptional enhancer, Asx  
(PHD\_3, N=3)

Fisher's OR: 5.03; Bonferroni p-val: 1

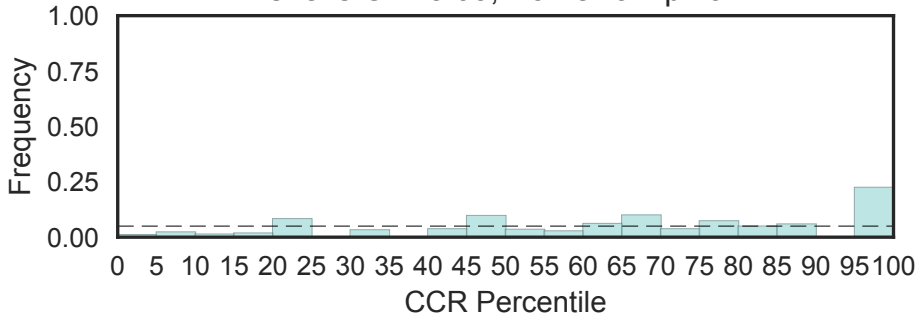

PHD-finger  
(PHD\_4, N=3)

Fisher's OR: 25; Bonferroni p-val: 0.00265

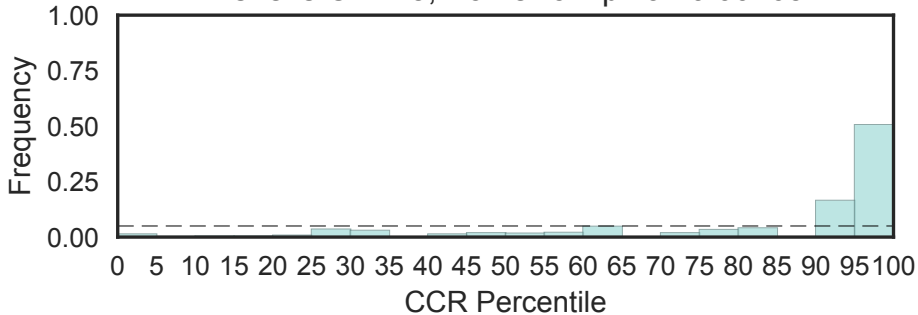

PHD finger protein 12 MRG binding domain  
(PHF12\_MRG\_bd, N=1)

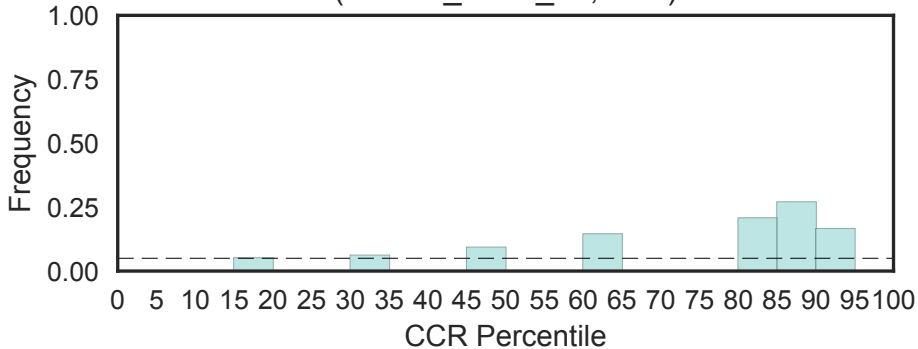

PHF5-like protein  
(PHF5, N=1)

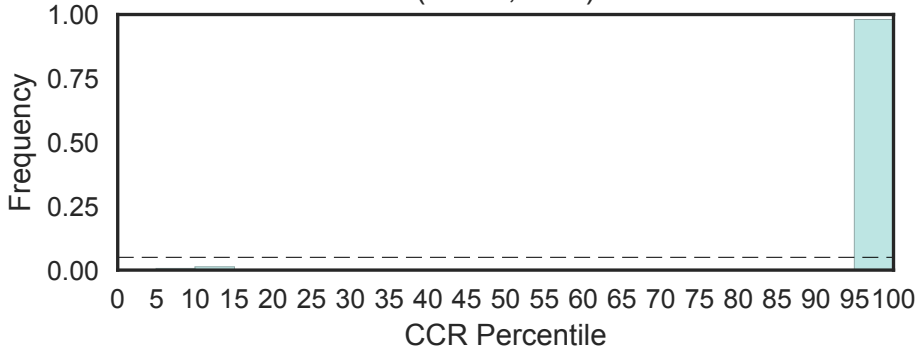

Cytosolic domain of 10TM putative phosphate transporter  
(PHM7\_cyt, N=3)

Fisher's OR: 0.597; Bonferroni p-val: 1

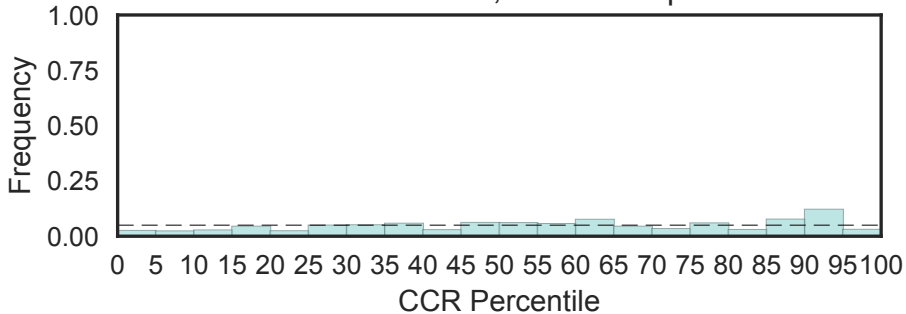



Phosphate transporter family  
(PHO4, N=2)

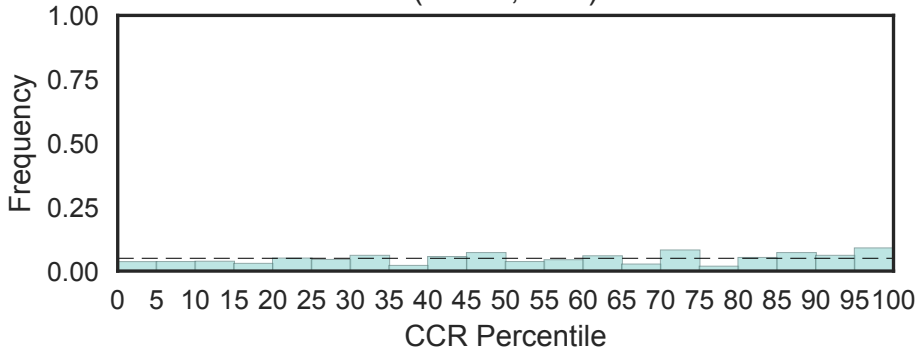

PHR domain  
(PHR, N=6)

Fisher's OR: 3.95; Bonferroni p-val: 1

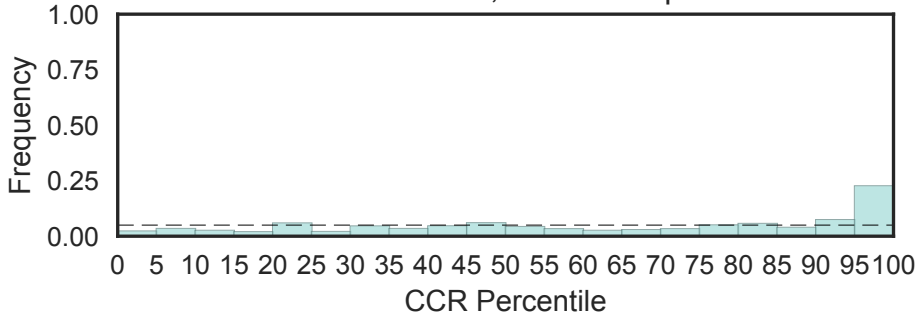

PTHB1 C-terminus  
(PHTB1\_C, N=1)

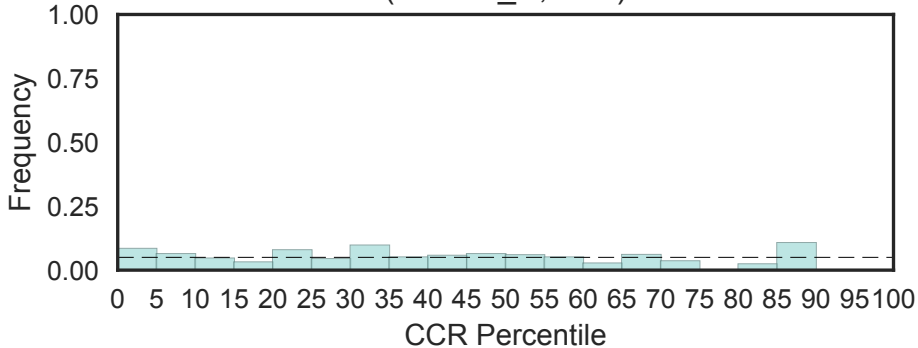

PTHB1 N-terminus  
(PHTB1\_N, N=1)

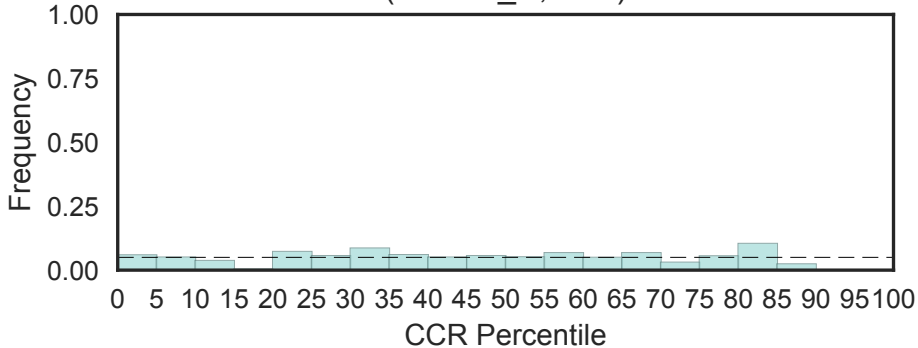

Pleckstrin homology domain  
(PH\_11, N=2)

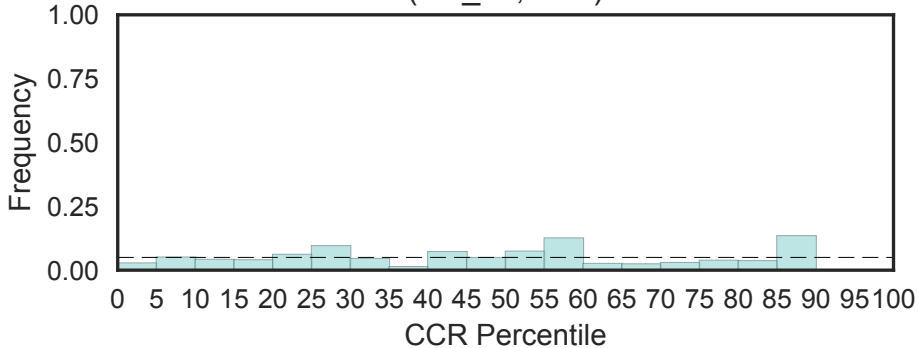

Pleckstrin homology domain  
(PH\_12, N=6)

Fisher's OR: 1.06; Bonferroni p-val: 1

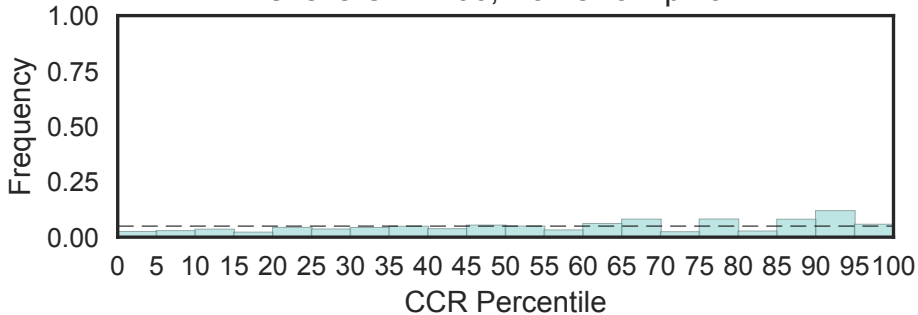

Pleckstrin homology domain  
(PH\_13, N=3)

Fisher's OR: 2.08; Bonferroni p-val: 1

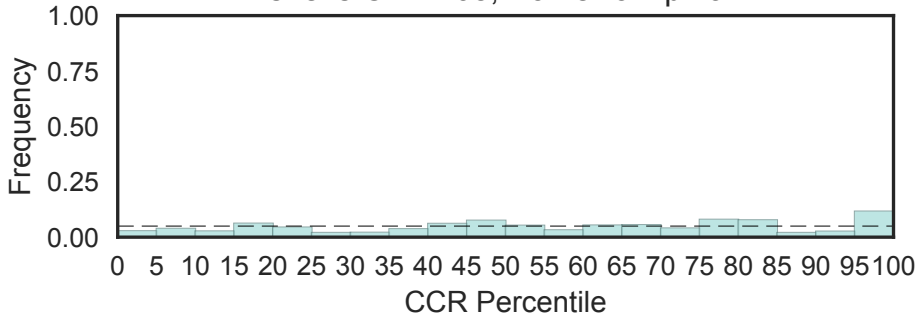

PH domain  
(PH\_3, N=6)

Fisher's OR: 0; Bonferroni p-val: 1

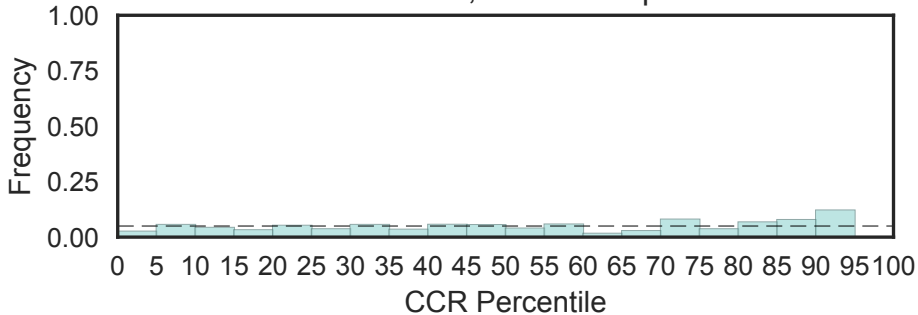



Pleckstrin homology domain  
(PH\_5, N=1)

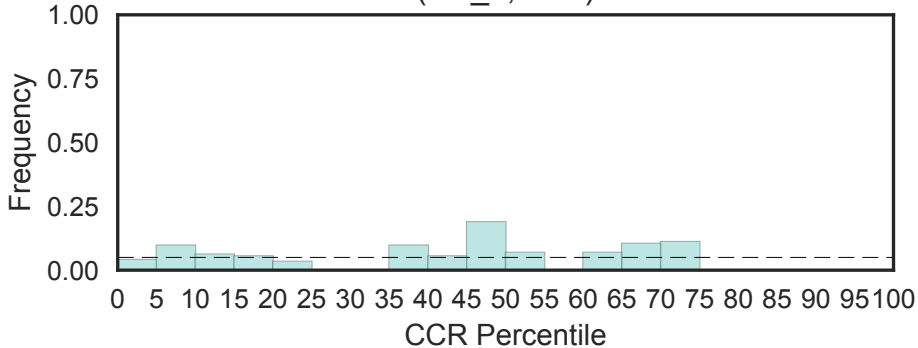

Pleckstrin homology domain  
(PH\_6, N=1)

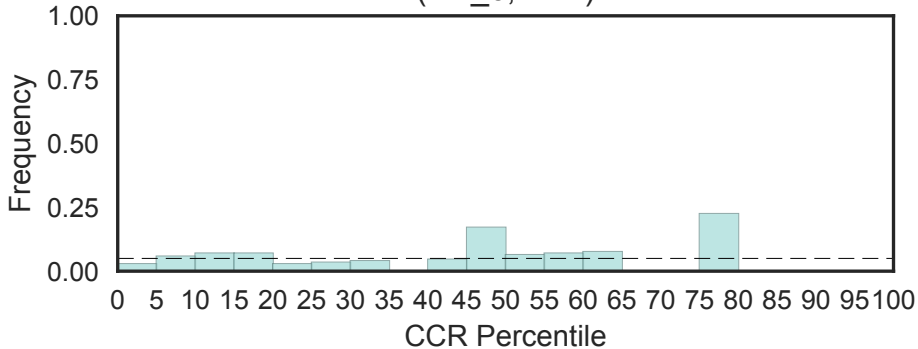

Pleckstrin homology domain  
(PH\_8, N=10)

Fisher's OR: 3.99; Bonferroni p-val: 1

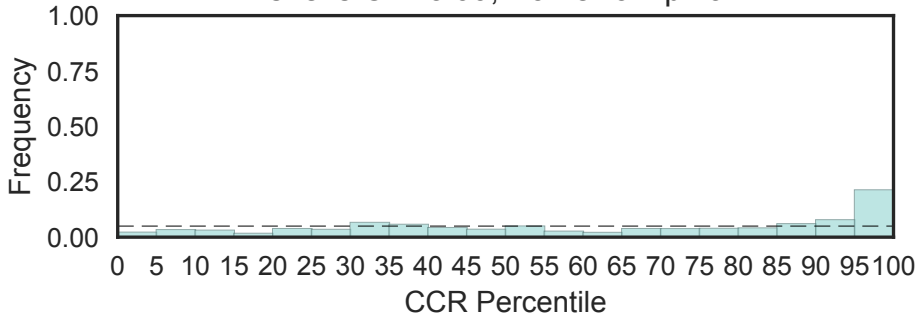

Pleckstrin homology domain  
(PH\_9, N=15)

Fisher's OR: 0.91; Bonferroni p-val: 1

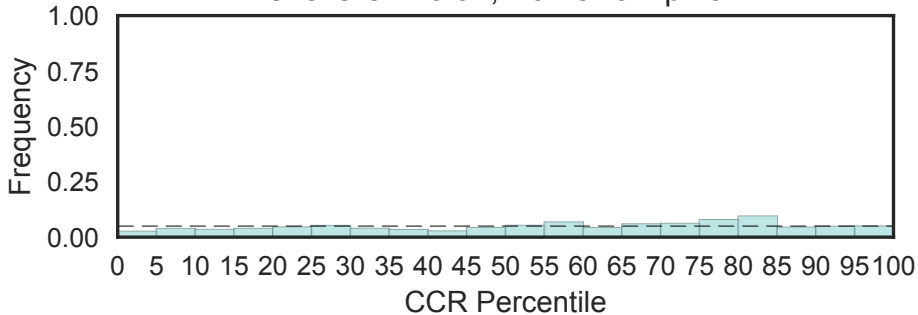

PH domain associated with Beige/BEACH  
(PH\_BEACH, N=8)

Fisher's OR: 2.5; Bonferroni p-val: 1

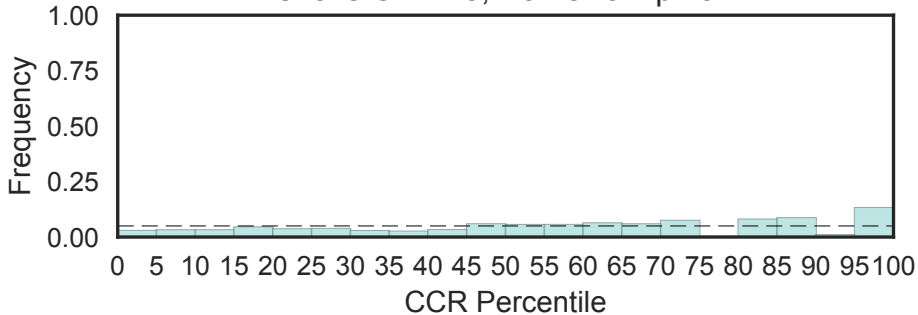

TFIIH p62 subunit, N-terminal domain  
(PH\_TFIIH, N=1)

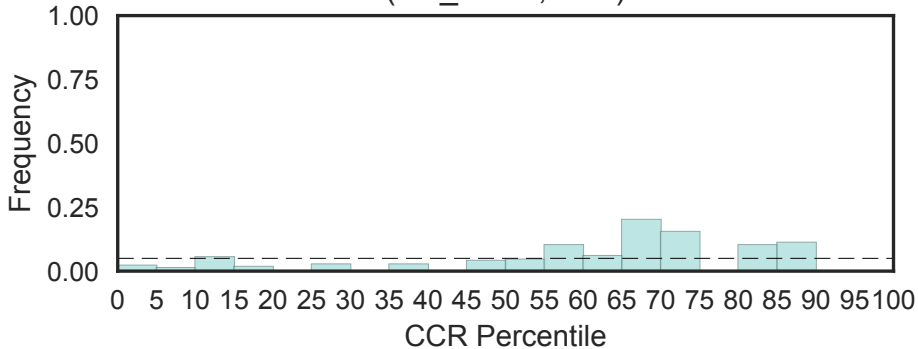

Phosphatidylinositol-specific phospholipase C, X domain  
(PI-PLC-X, N=15)

Fisher's OR: 2.35; Bonferroni p-val: 1

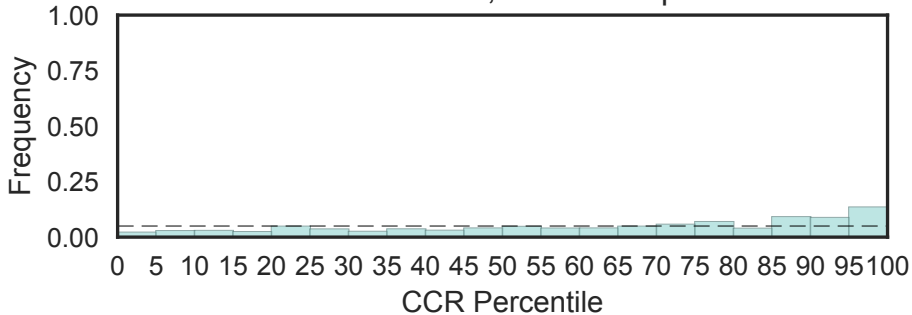

Phosphatidylinositol-specific phospholipase C, Y domain  
(PI-PLC-Y, N=15)

Fisher's OR: 1.43; Bonferroni p-val: 1

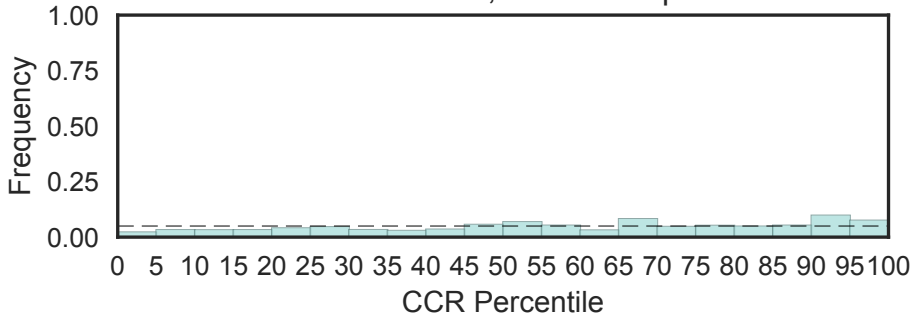



PI31 proteasome regulator  
(PI31\_Prot\_C, N=1)

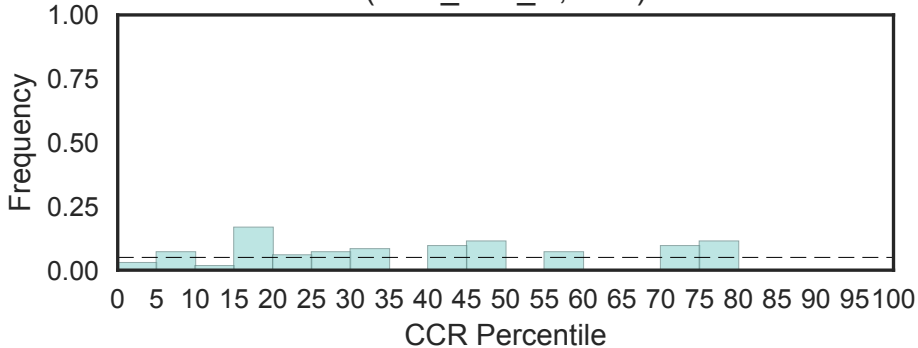

PI31 proteasome regulator N-terminal  
(PI31\_Prot\_N, N=2)

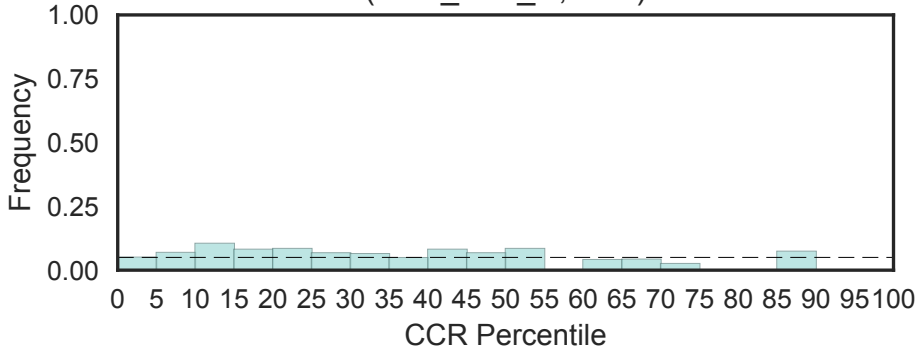

Phosphoinositide 3-kinase gamma adapter protein p101 subunit  
(PI3K\_1B\_p101, N=4)

Fisher's OR: 1.86; Bonferroni p-val: 1

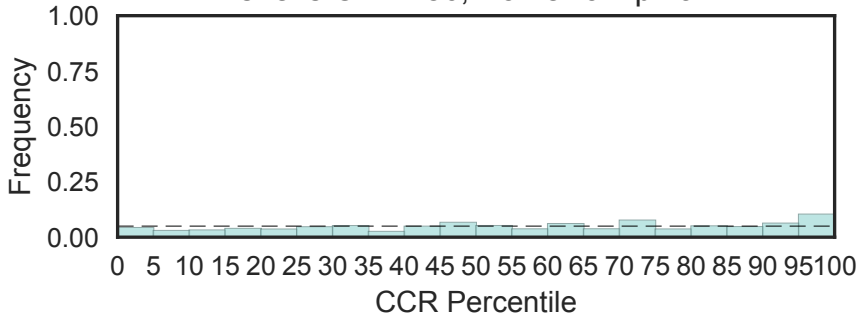

Phosphoinositide 3-kinase C2  
(PI3K\_C2, N=8)

Fisher's OR: 0.954; Bonferroni p-val: 1

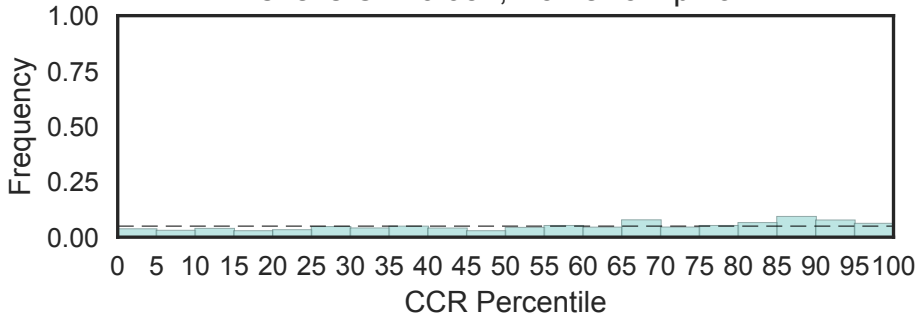

Phosphatidylinositol 3-kinase regulatory subunit P85 inter-SH2 domain  
(PI3K\_P85\_iSH2, N=3)

Fisher's OR: 1.59; Bonferroni p-val: 1

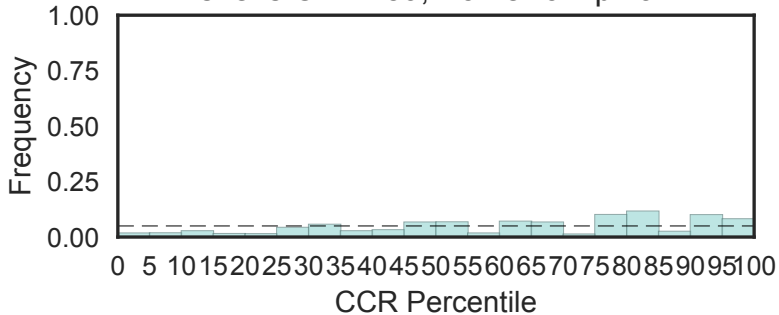

PI3-kinase family, p85-binding domain  
(PI3K\_p85B, N=3)

Fisher's OR: 8.32; Bonferroni p-val: 1

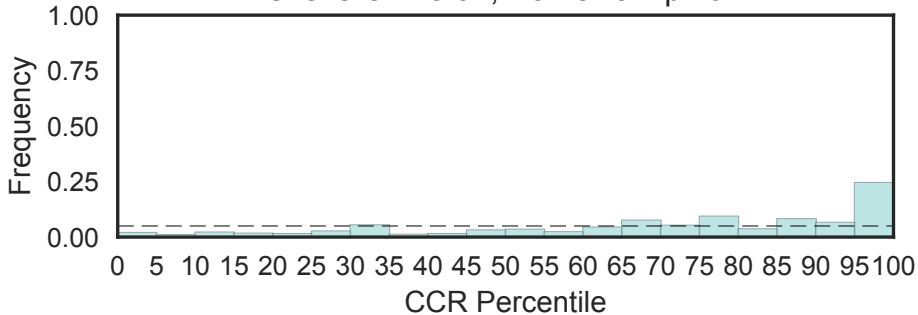

PI3-kinase family, ras-binding domain  
(PI3K\_rbd, N=7)

Fisher's OR: 2.33; Bonferroni p-val: 1

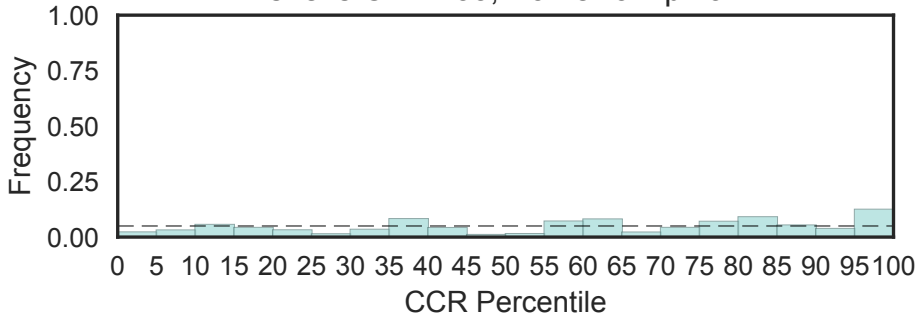

Phosphoinositide 3-kinase family, accessory domain (PIK domain)  
(PI3Ka, N=9)

Fisher's OR: 1.02; Bonferroni p-val: 1

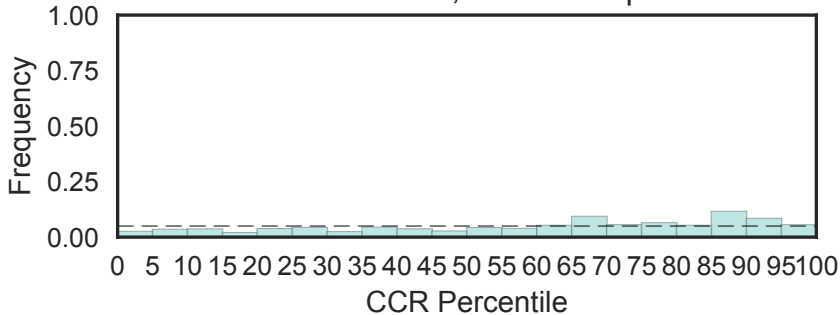



Phosphatidylinositol 3- and 4-kinase  
(PI3\_PI4\_kinase, N=21)

Fisher's OR: 4.64; Bonferroni p-val: 4.18e-13

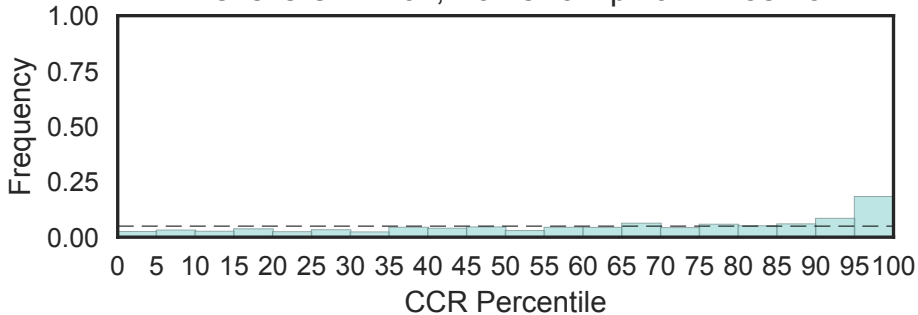

Phosphotyrosine interaction domain (PTB/PID)  
(PID, N=35)

Fisher's OR: 0.785; Bonferroni p-val: 1

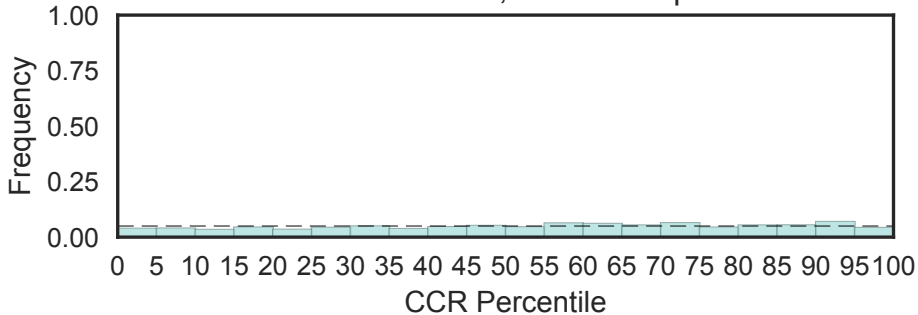

Phosphotyrosine interaction domain (PTB/PID)  
(PID\_2, N=6)

Fisher's OR: 0; Bonferroni p-val: 1

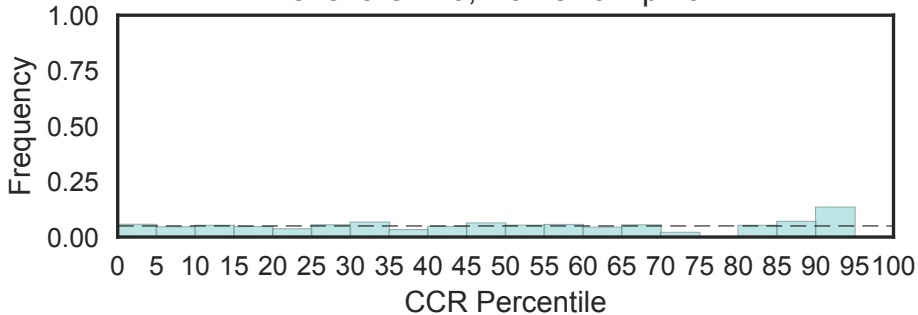

Piezo  
(PIEZO, N=2)

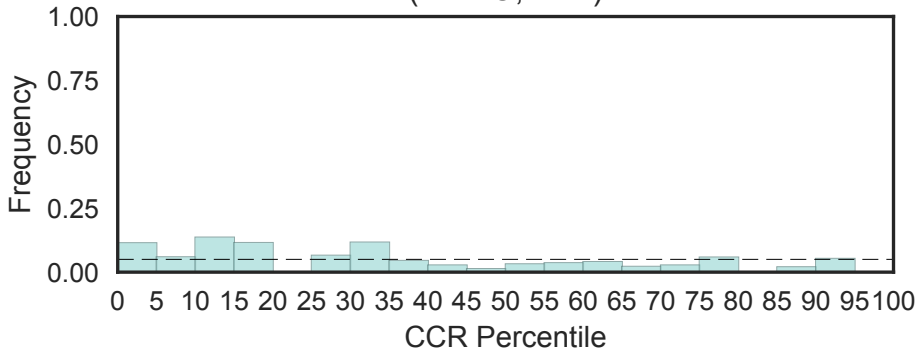

PIF1-like helicase  
(PIF1, N=1)

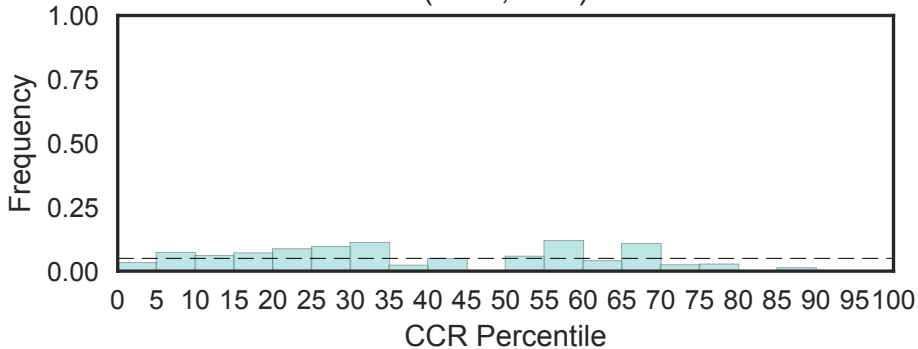

# GPI biosynthesis protein family Pig-F (PIG-F, N=1)

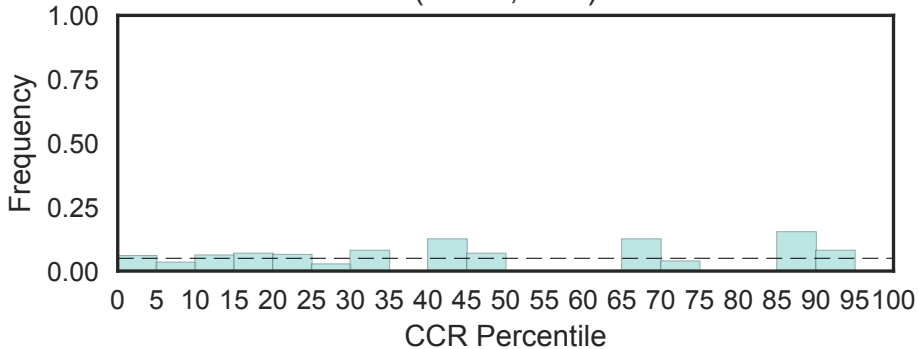

# GPI-GlcNAc transferase complex, PIG-H component (PIG-H, N=1)

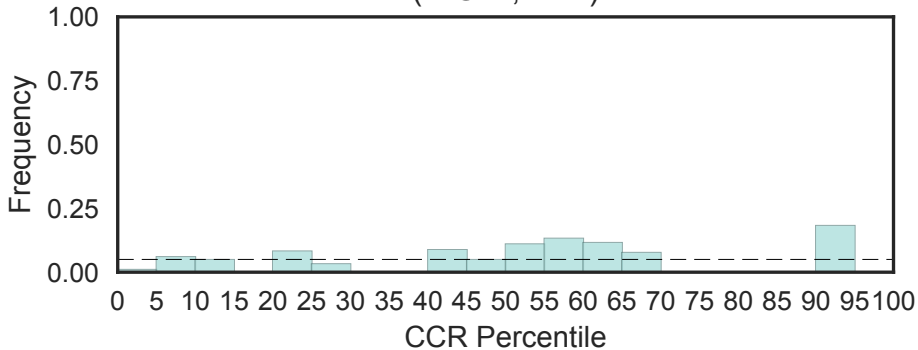

GlcNAc-PI de-N-acetylase  
(PIG-L, N=1)

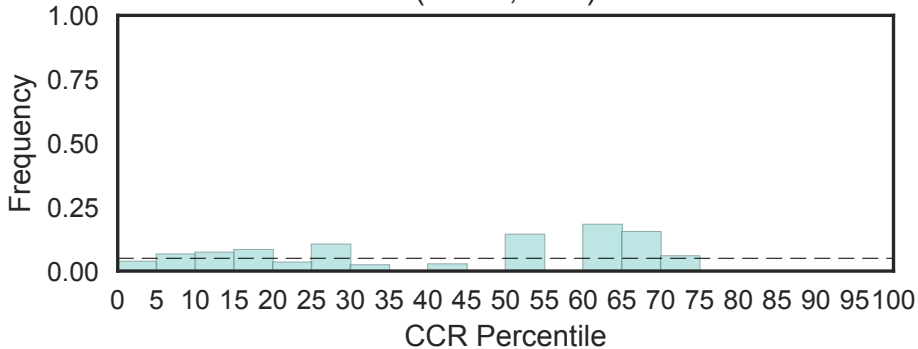



PIG-P  
(PIG-P, N=1)

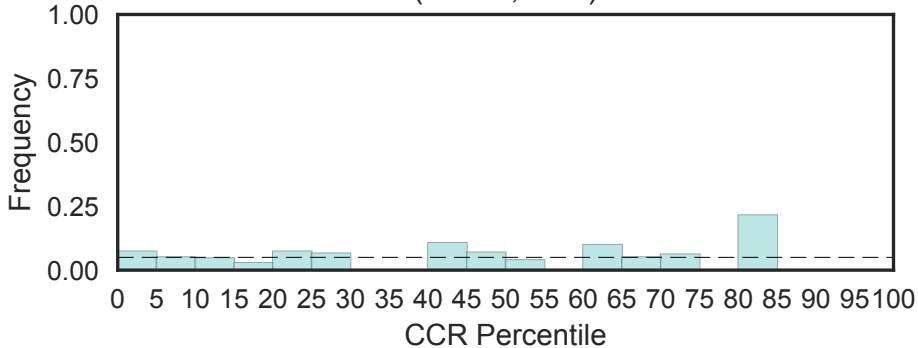

# Phosphatidylinositol-glycan biosynthesis class S protein (PIG-S, N=1)

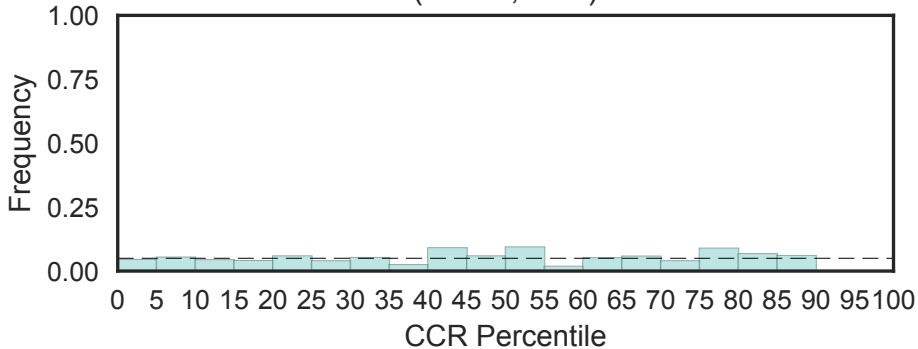

GPI transamidase subunit PIG-U  
(PIG-U, N=2)

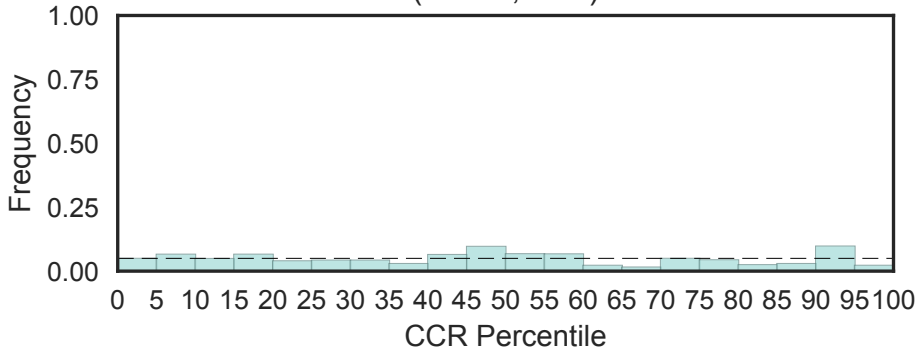

PIG-X / PBN1  
(PIG-X, N=1)

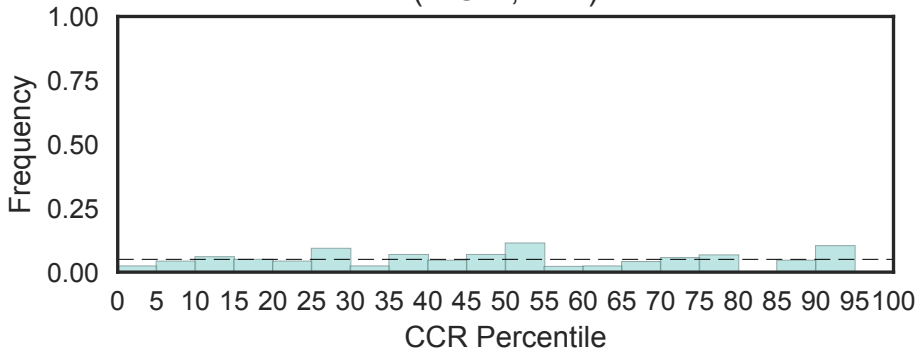

pre-RNA processing PIH1/Nop17  
(PIH1, N=4)

Fisher's OR: 0; Bonferroni p-val: 1

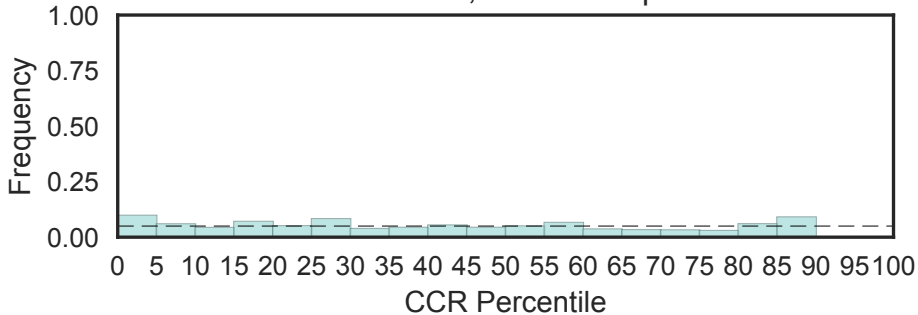

PINIT domain  
(PINIT, N=4)

Fisher's OR: 1.79; Bonferroni p-val: 1

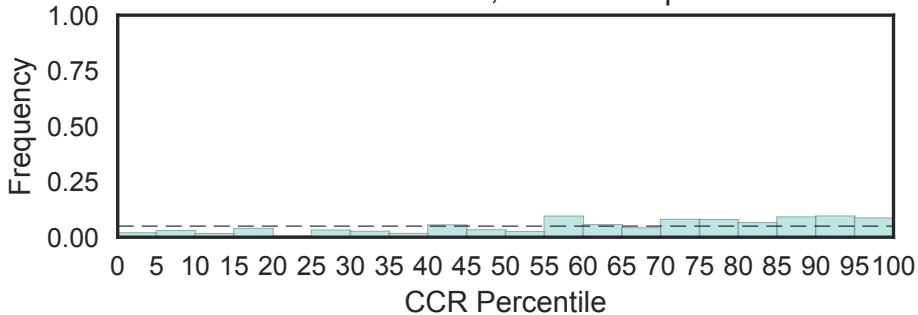

PIN domain  
(PIN\_4, N=4)

Fisher's OR: 1.93; Bonferroni p-val: 1

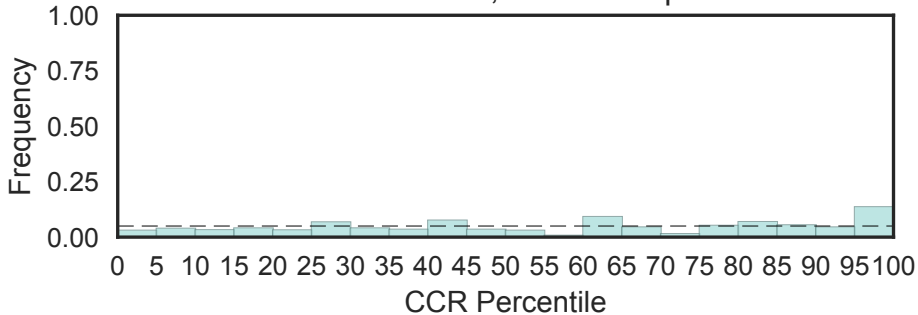

PIN domain of ribonuclease  
(PIN\_6, N=1)

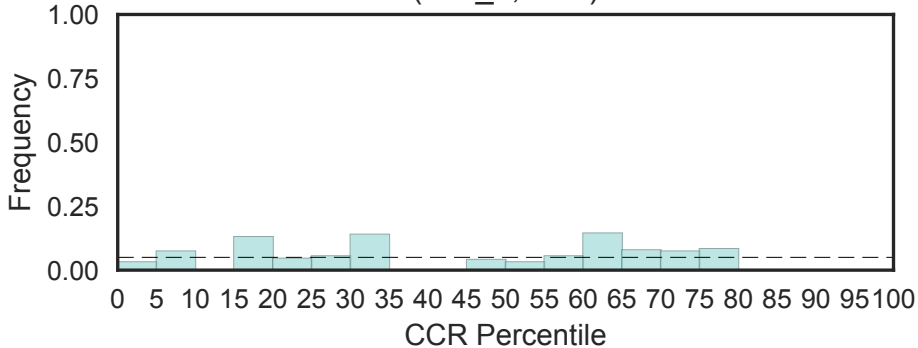



Protein-kinase domain of FAM69  
(PIP49\_C, N=5)

Fisher's OR: 0.344; Bonferroni p-val: 1

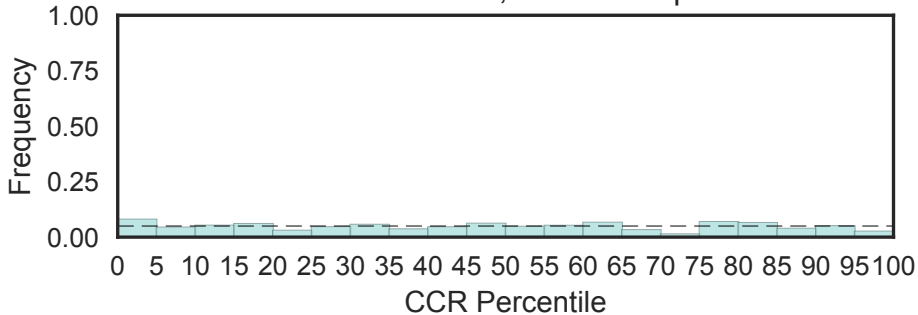

N-term cysteine-rich ER, FAM69  
(PIP49\_N, N=4)

Fisher's OR: 1.44; Bonferroni p-val: 1

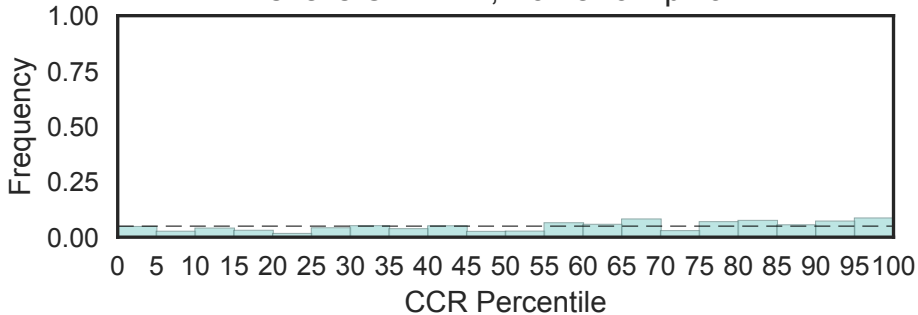

Phosphatidylinositol-4-phosphate 5-Kinase  
(PIP5K, N=9)

Fisher's OR: 2.25; Bonferroni p-val: 1

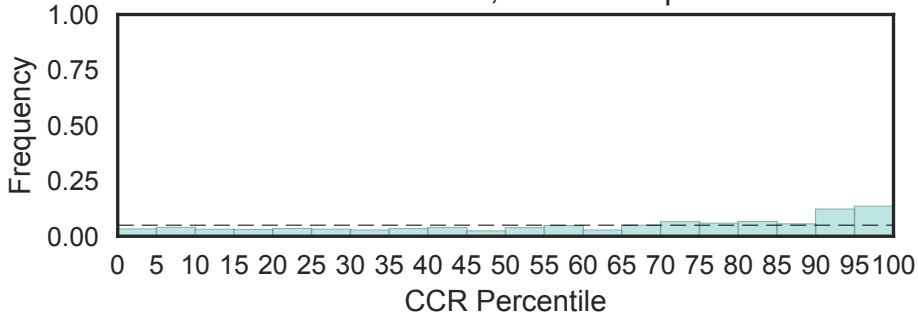

Phosphoinositide-interacting protein family  
(PIRT, N=1)

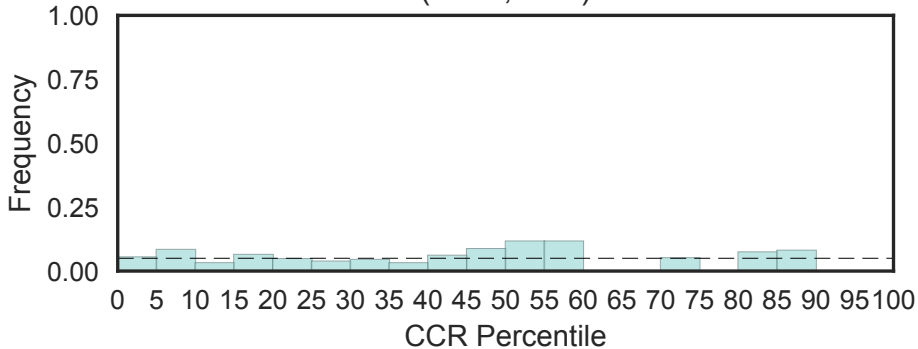

PITH domain  
(PITH, N=2)

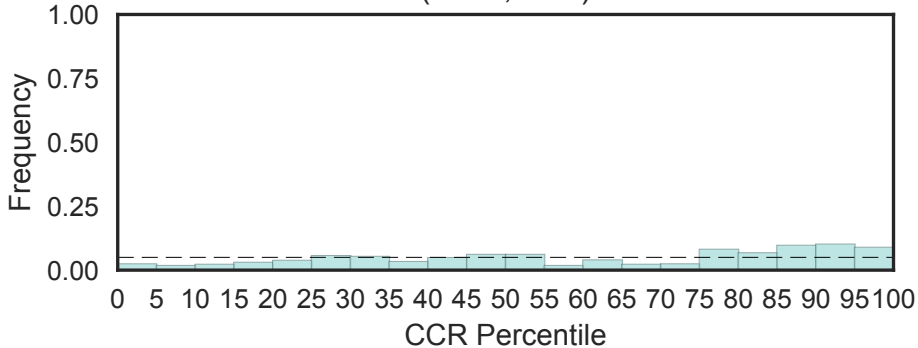

Pyruvate kinase, barrel domain  
(PK, N=2)

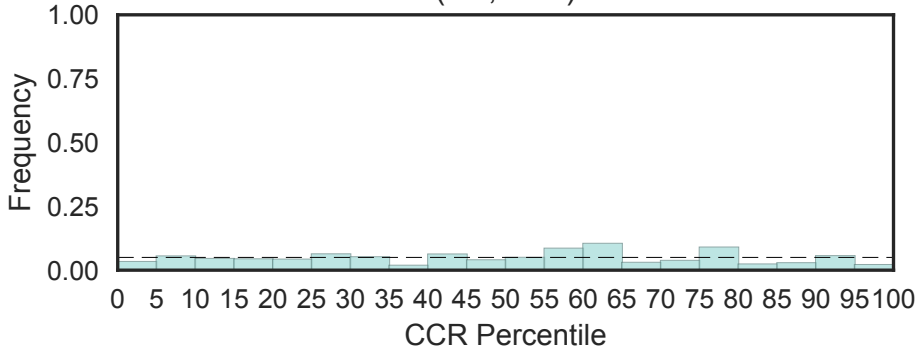

PKD domain  
(PKD, N=21)

Fisher's OR: 0; Bonferroni p-val: 1

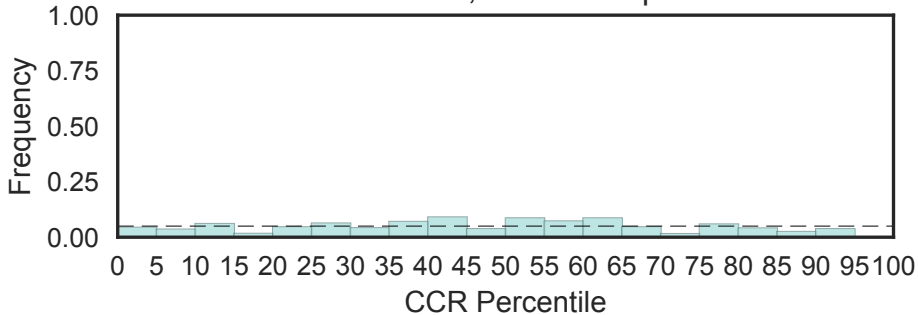

Polycystin cation channel  
(PKD\_channel, N=38)

Fisher's OR: 3.05; Bonferroni p-val: 1.28e-09

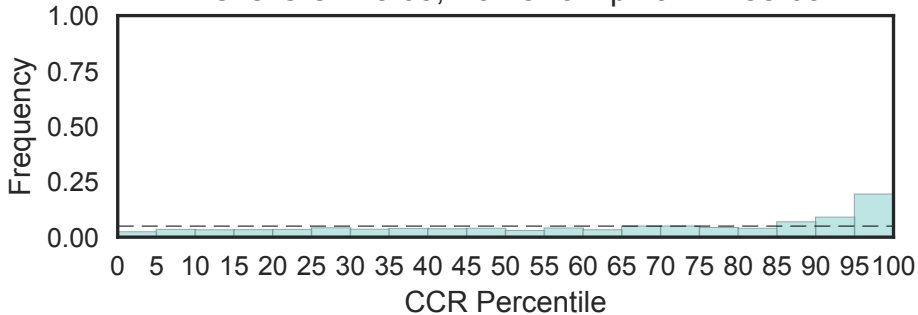



cAMP-dependent protein kinase inhibitor  
(PKI, N=3)

Fisher's OR: 0; Bonferroni p-val: 1

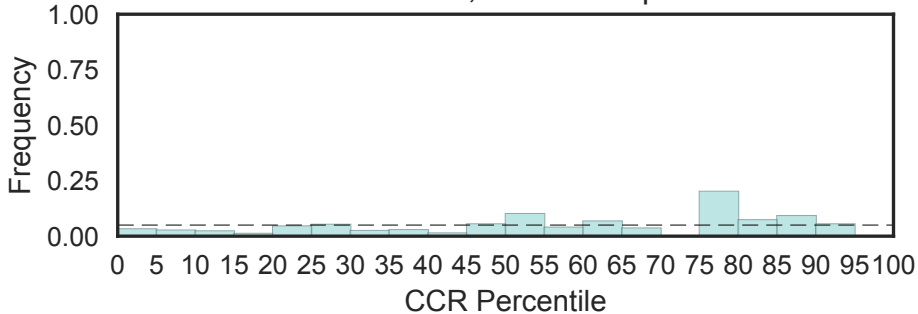

Polo kinase kinase  
(PKK, N=4)

Fisher's OR: 0; Bonferroni p-val: 1

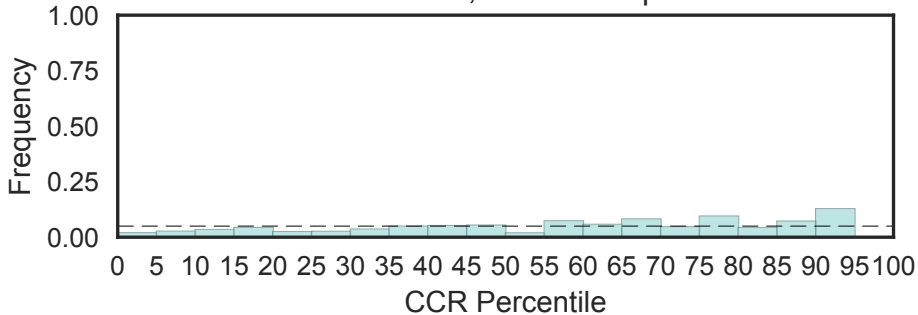

Pyruvate kinase, alpha/beta domain  
(PK\_C, N=2)

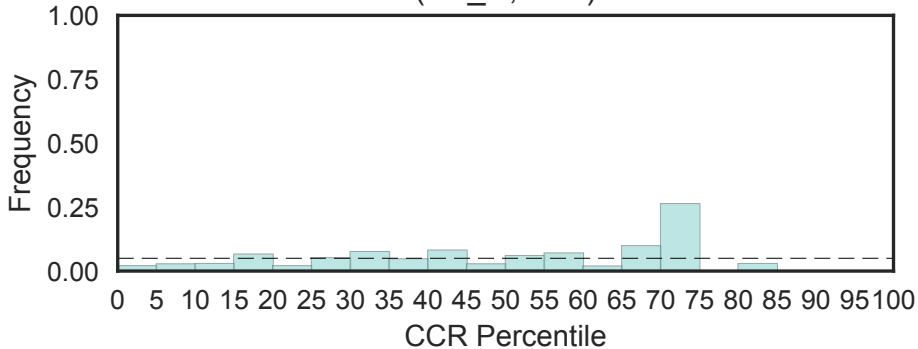

Coiled-coil N-terminus of cGMP-dependent protein kinase  
(PKcGMP\_CC, N=1)

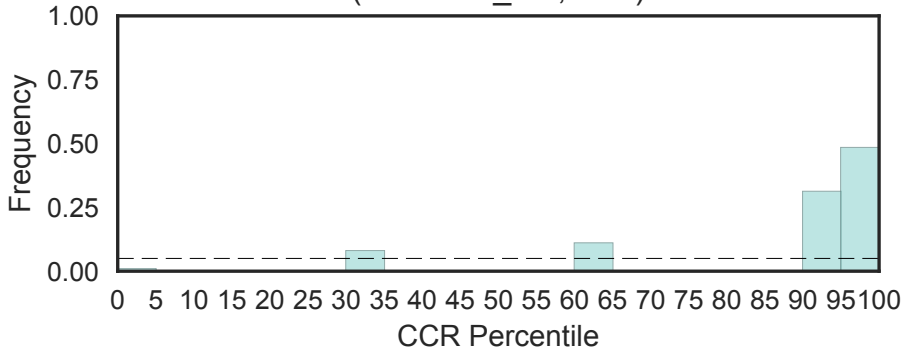

Filopodia upregulated, FAM65  
(PL48, N=3)

Fisher's OR: 1.05; Bonferroni p-val: 1

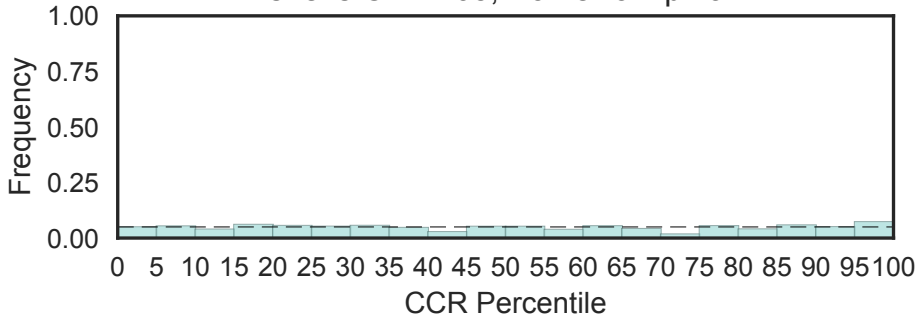

Group XII secretory phospholipase A2 precursor (PLA2G12)  
(PLA2G12, N=2)

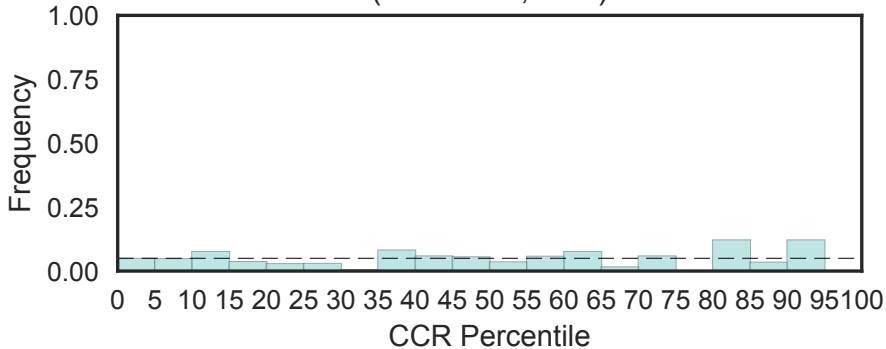

Lysophospholipase catalytic domain  
(PLA2\_B, N=7)

Fisher's OR: 0.971; Bonferroni p-val: 1

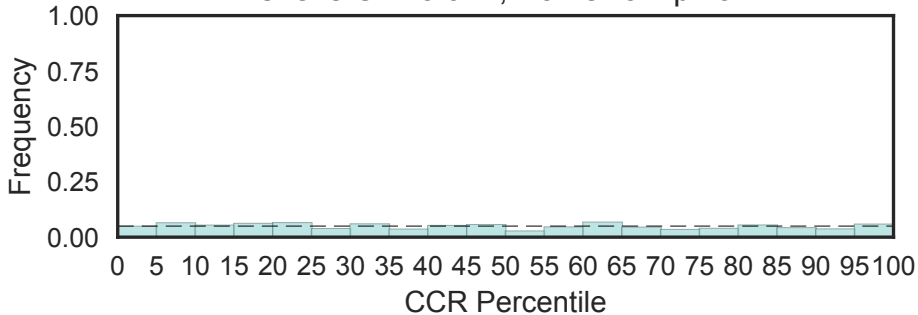

Phospholipase A2 inhibitor  
(PLA2\_inh, N=2)

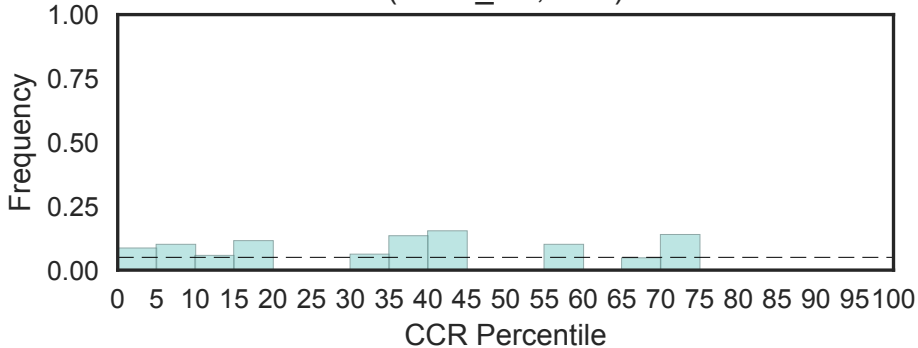



PLAC (protease and lacunin) domain  
(PLAC, N=13)

Fisher's OR: 0; Bonferroni p-val: 1

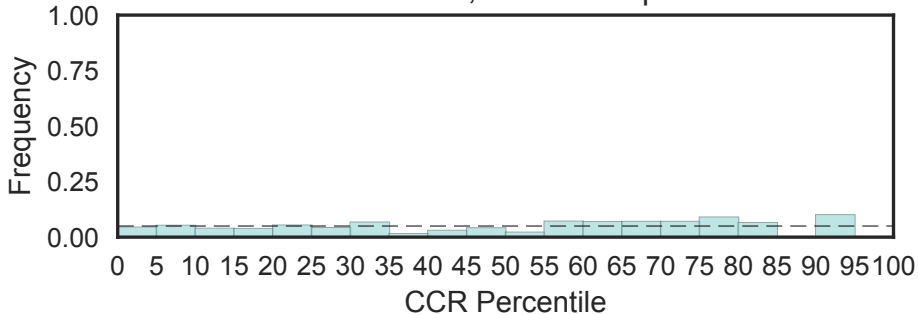

PLAC8 family  
(PLAC8, N=3)

Fisher's OR: 0; Bonferroni p-val: 1

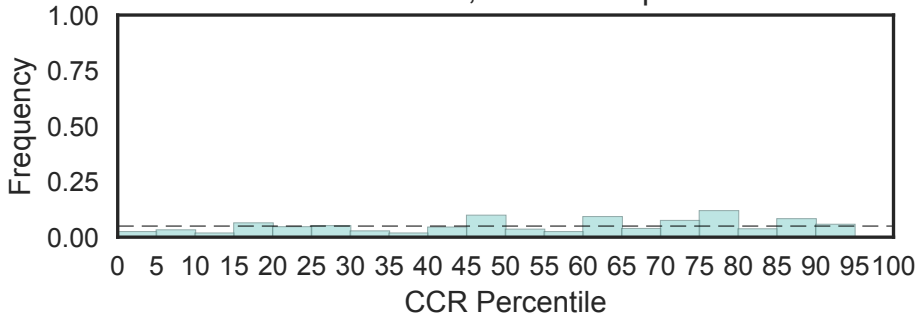

PLAT/LH2 domain  
(PLAT, N=34)

Fisher's OR: 0.0832; Bonferroni p-val: 1

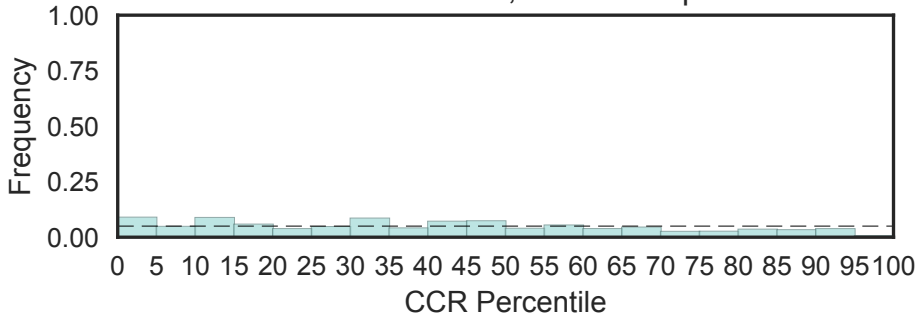

PLC-beta C terminal  
(PLC-beta\_C, N=3)

Fisher's OR: 0.578; Bonferroni p-val: 1

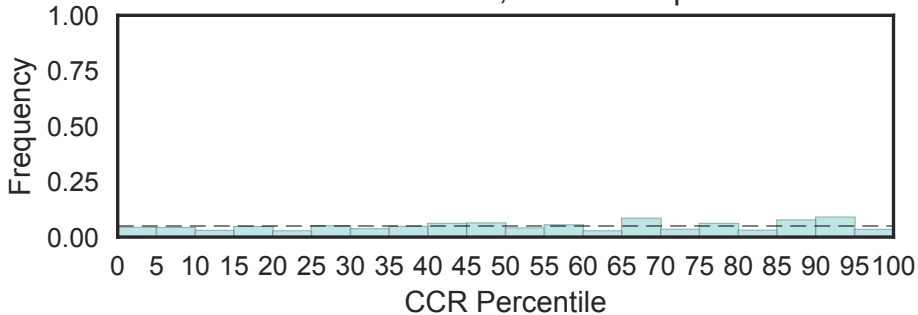

Phospholipase D Active site motif  
(PLDc, N=6)

Fisher's OR: 0; Bonferroni p-val: 1

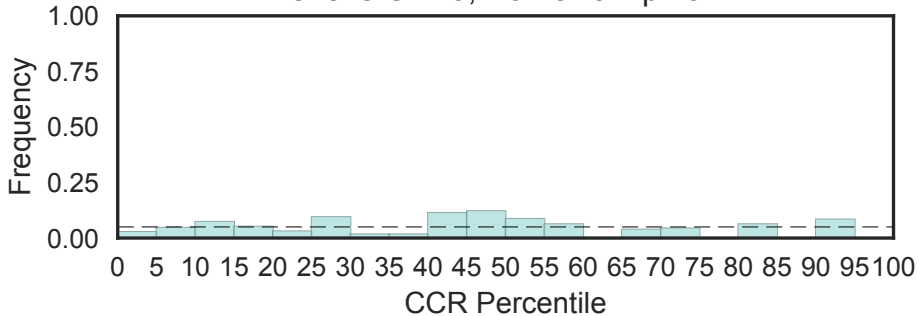

PLD-like domain  
(PLDc\_2, N=12)

Fisher's OR: 0.166; Bonferroni p-val: 1

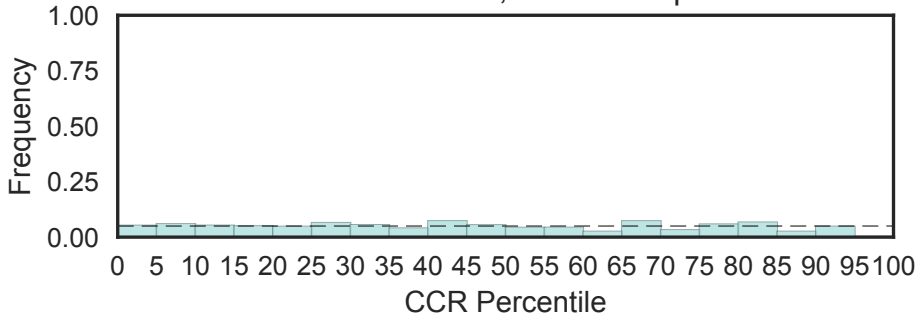

PLD-like domain  
(PLDc\_3, N=3)

Fisher's OR: 0; Bonferroni p-val: 1

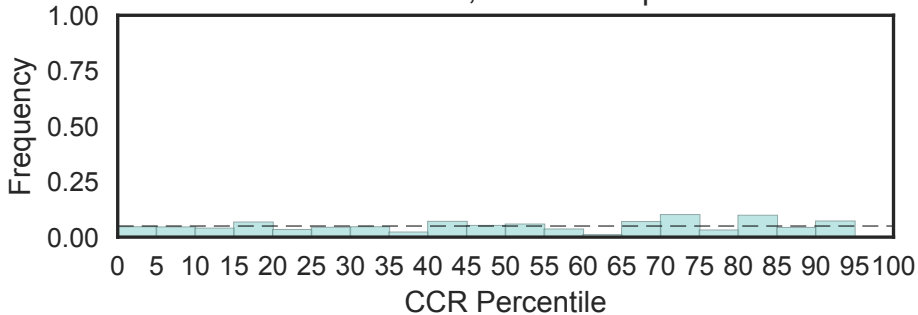

PLU-1-like protein  
(PLU-1, N=2)

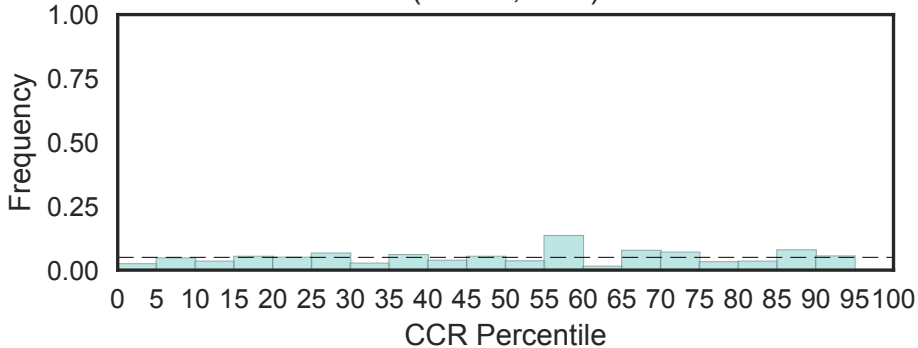



Phorbol-12-myristate-13-acetate-induced  
(PMAIP1, N=1)

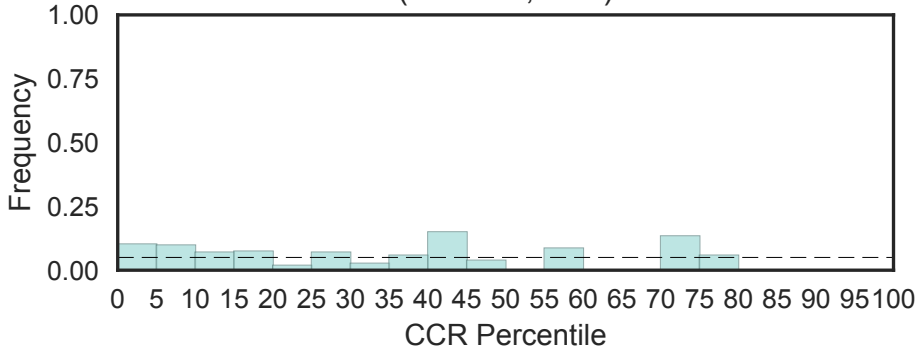

PMC2NT (NUC016) domain  
(PMC2NT, N=1)

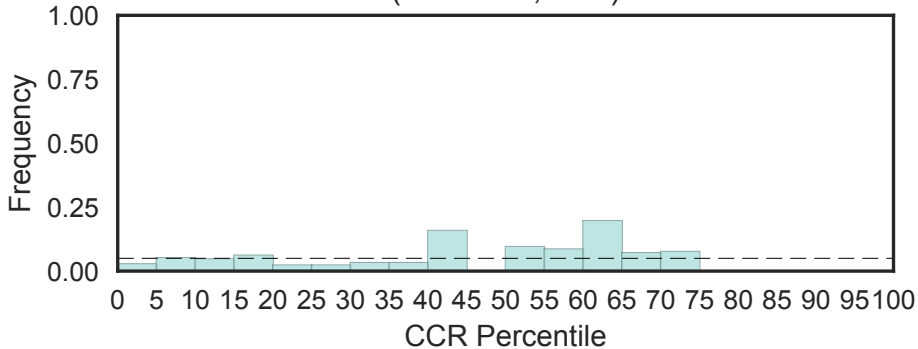

PMG protein  
(PMG, N=13)

Fisher's OR: 0; Bonferroni p-val: 1

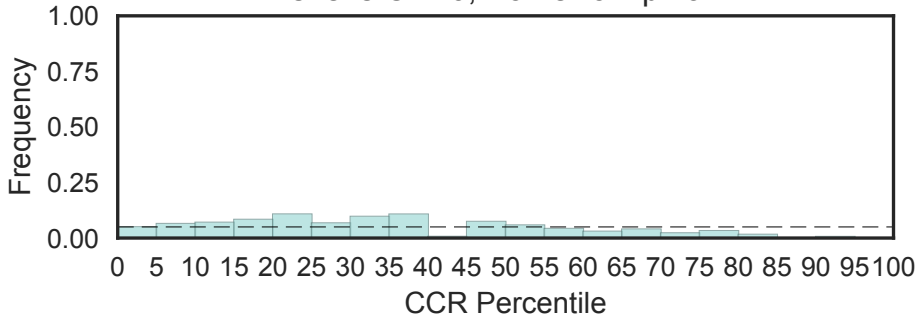

Phosphomannose isomerase type I  
(PMI\_type1, N=1)

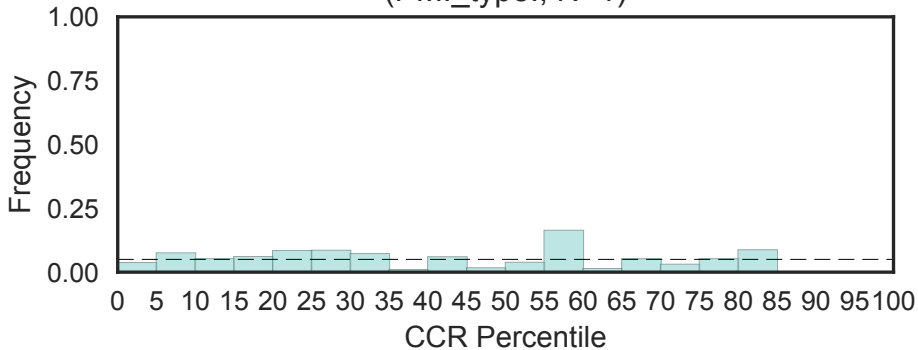

Eukaryotic phosphomannomutase  
(PMM, N=3)

Fisher's OR: 0; Bonferroni p-val: 1

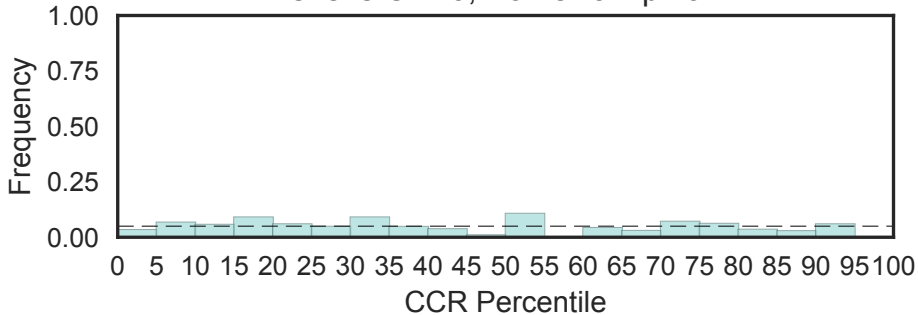

PMP-22/EMP/MP20/Claudin family  
(PMP22\_Claudin, N=43)  
Fisher's OR: 0.432; Bonferroni p-val: 1

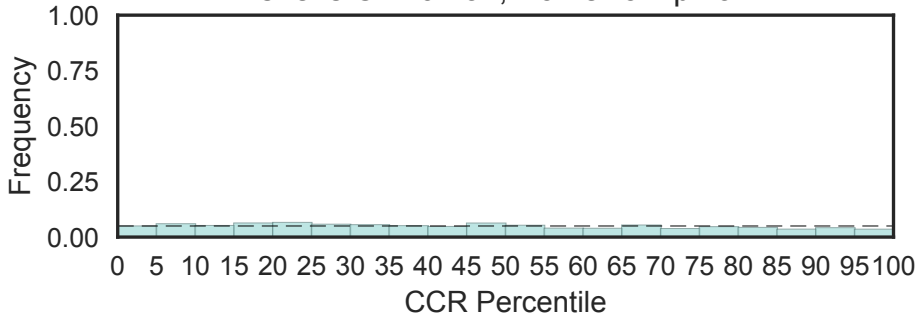

Protein missing in infertile sperm 1, putative  
(PMSI1, N=1)

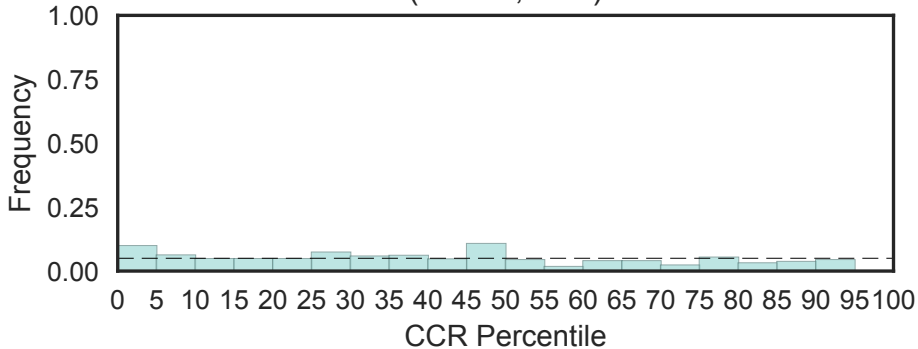

# Peptide methionine sulfoxide reductase (PMSR, N=1)

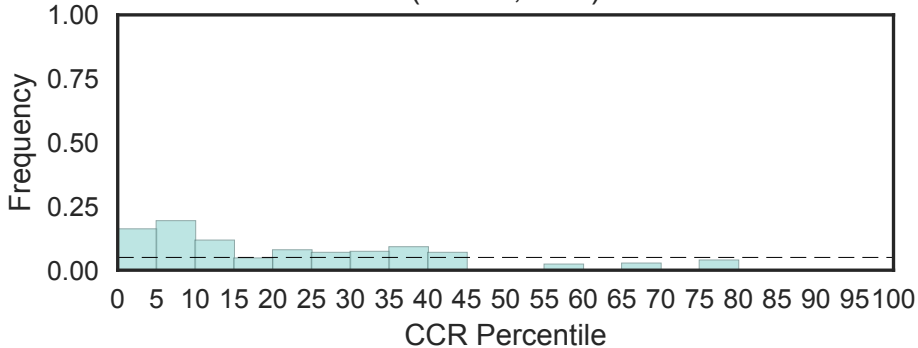



# Dolichyl-phosphate-mannose-protein mannosyltransferase (PMT, N=2)

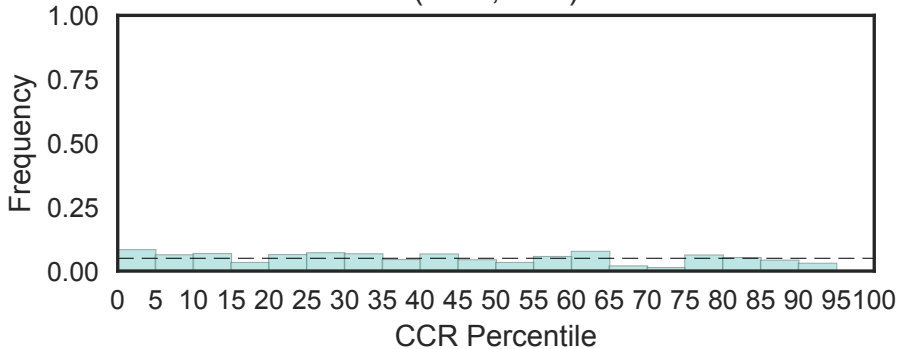

# Dolichyl-phosphate-mannose-protein mannosyltransferase (PMT\_2, N=2)

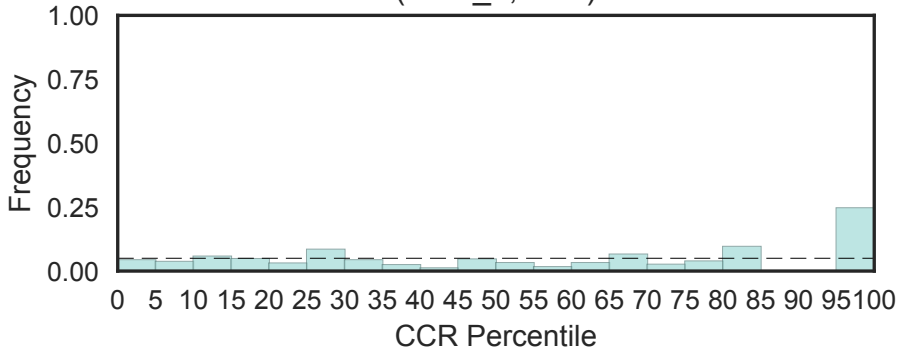

# C-terminal four TMM region of protein-O-mannosyltransferase (PMT\_4TMC, N=2)

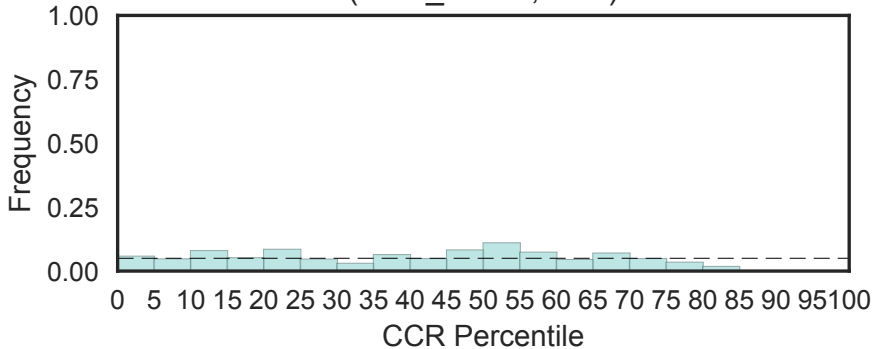

# Arginine/serine-rich protein PNISR (PNISR, N=1)

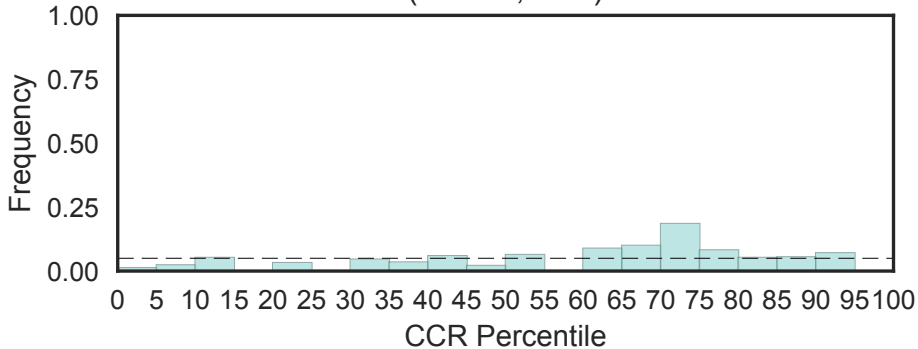

Polynucleotide kinase 3 phosphatase  
(PNK3P, N=1)

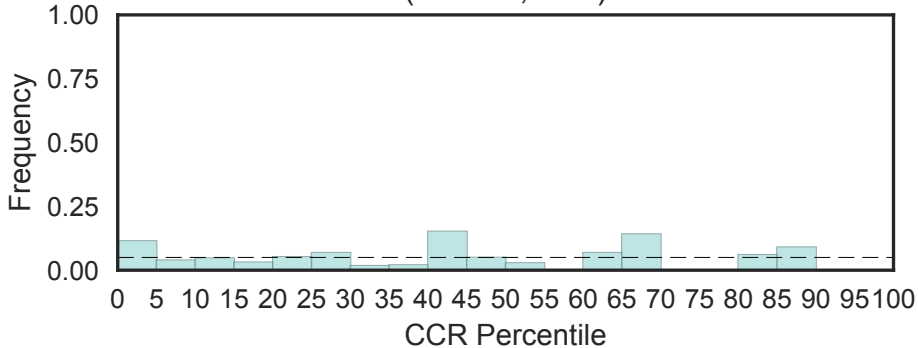

PNMA  
(PNMA, N=7)

Fisher's OR: 0; Bonferroni p-val: 1

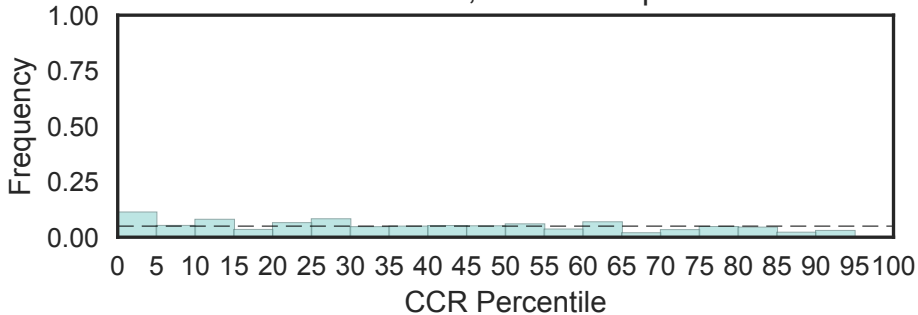

# Phosphorylase superfamily

(PNP\_UDP\_1, N=7)

Fisher's OR: 0; Bonferroni p-val: 1

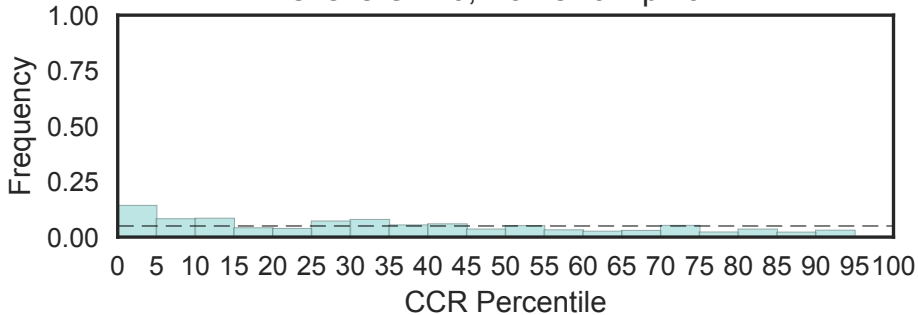

Pyridoxine 5'-phosphate oxidase C-terminal dimerisation region  
(PNP\_phzG\_C, N=1)

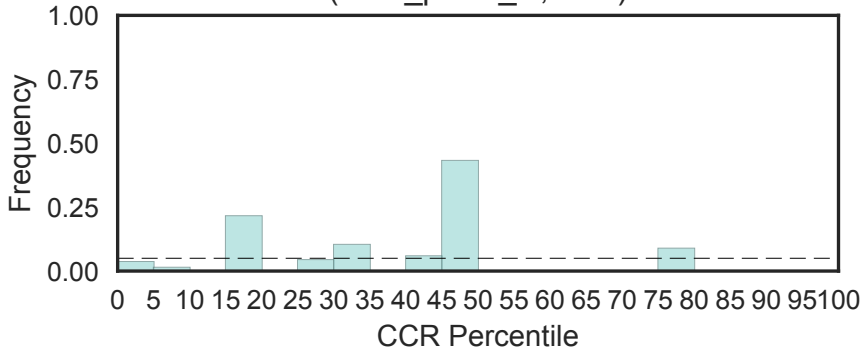



Polyribonucleotide nucleotidyltransferase, RNA binding domain  
(PNPase, N=1)

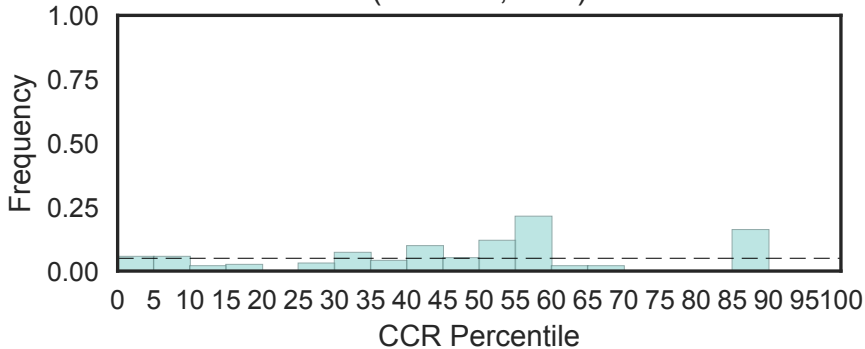

Proline-rich nuclear receptor coactivator motif  
(PNRC, N=2)

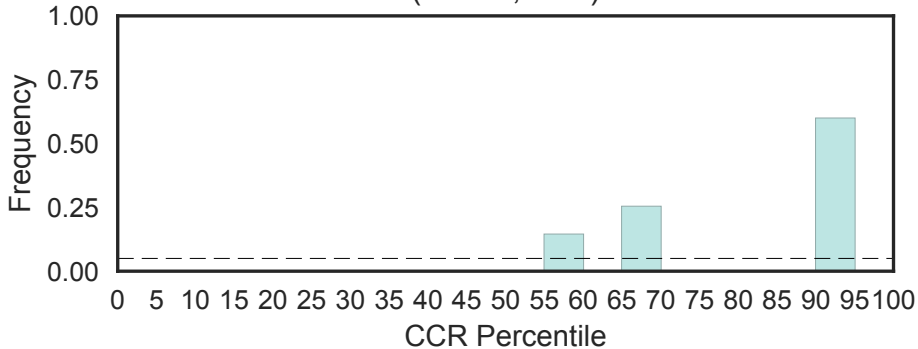

NAD(P) transhydrogenase beta subunit  
(PNTB, N=1)

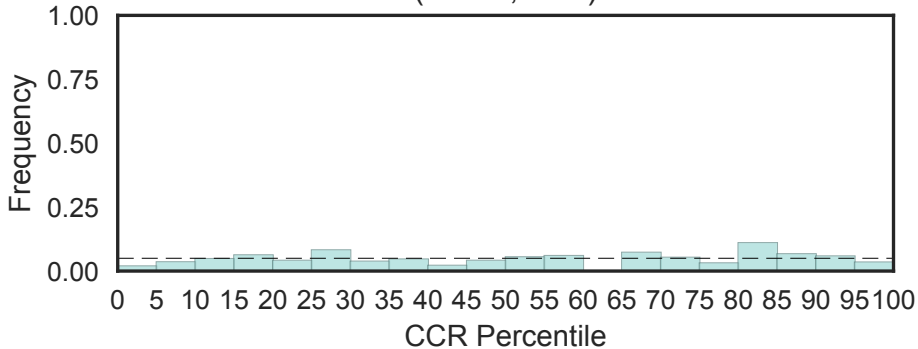

4TM region of pyridine nucleotide transhydrogenase, mitoch  
(PNTB\_4TM, N=1)

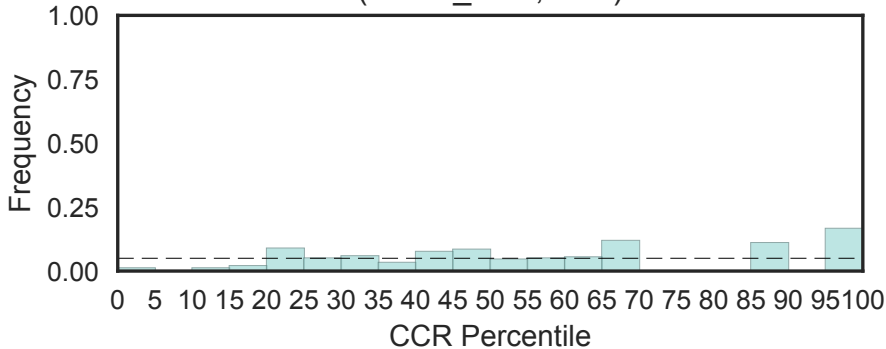

POB3-like N-terminal PH domain  
(POB3\_N, N=1)

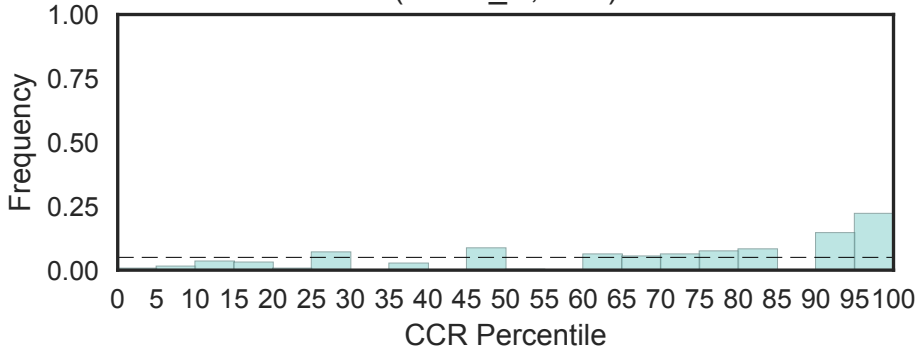

POLO box duplicated region  
(POLO\_box, N=7)

Fisher's OR: 1.51; Bonferroni p-val: 1

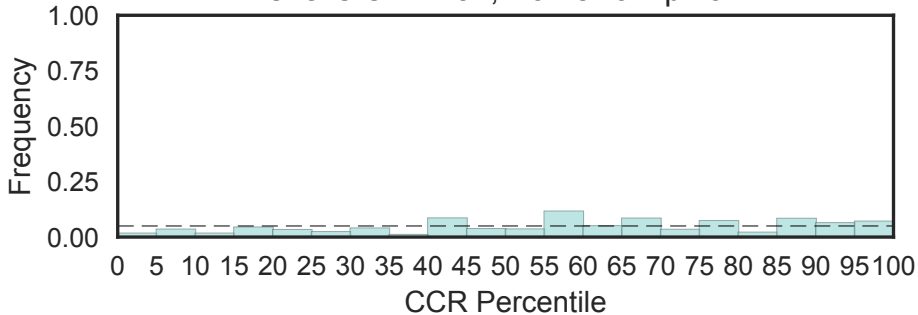

POM121 family  
(POM121, N=10)

Fisher's OR: 0; Bonferroni p-val: 1

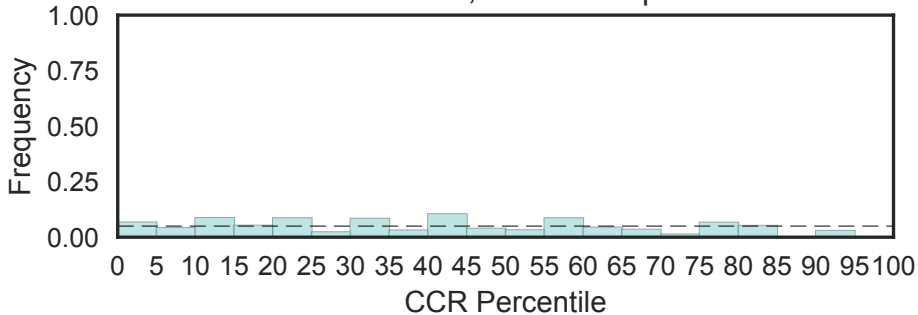

Ribonucleases P/MRP protein subunit POP1  
(POP1, N=1)

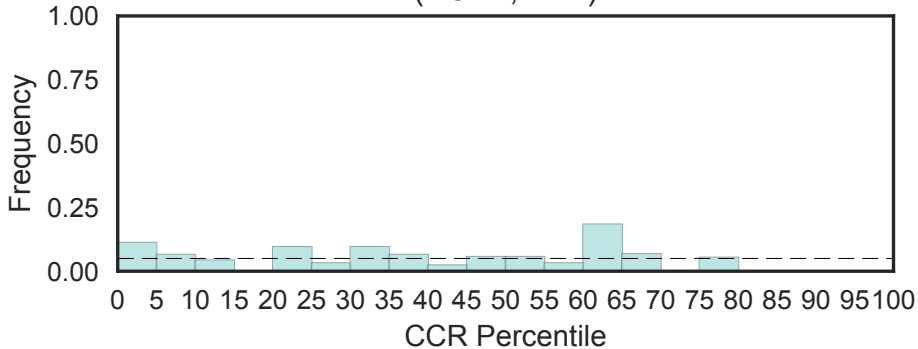



POPLD (NUC188) domain  
(POPLD, N=1)

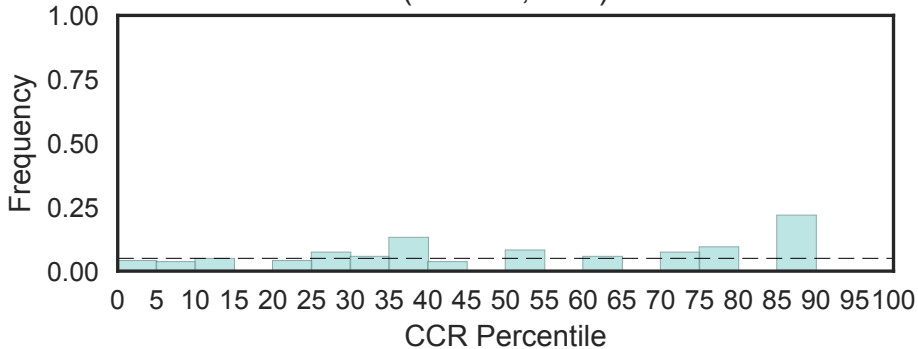

Telomeric single stranded DNA binding POT1/CDC13  
(POT1, N=1)

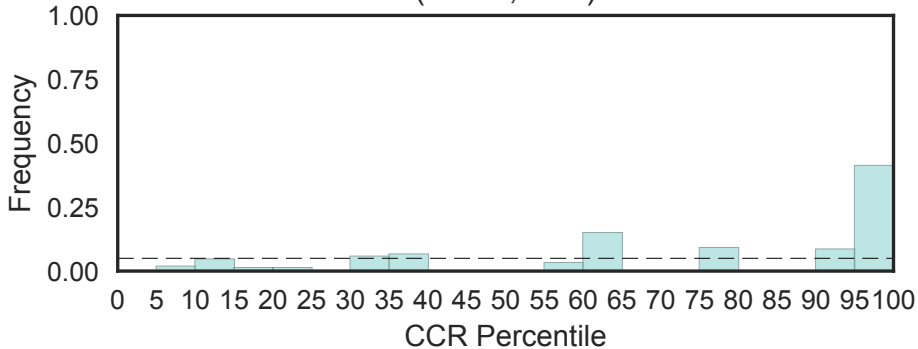

ssDNA-binding domain of telomere protection protein  
(POT1PC, N=1)

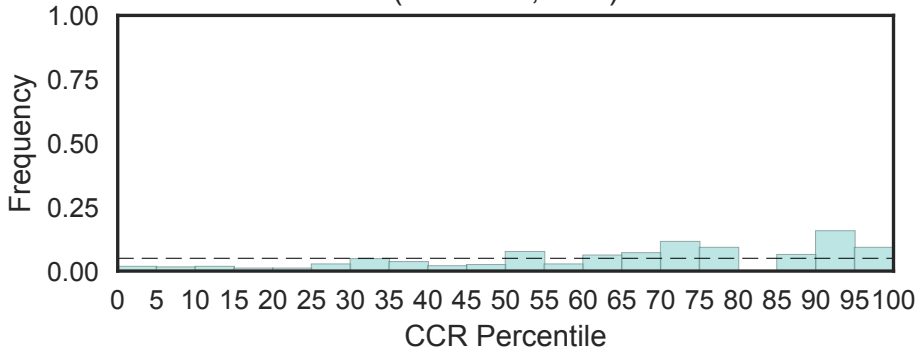

Phosphopantetheine attachment site  
(PP-binding, N=5)

Fisher's OR: 2.33; Bonferroni p-val: 1

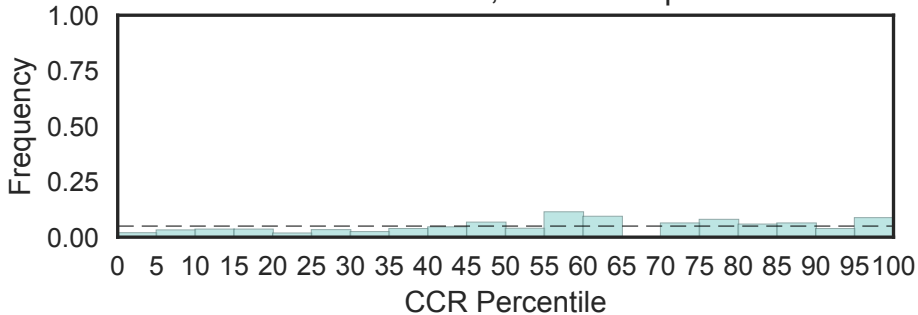

Protein phosphatase 1 binding  
(PP1\_bind, N=2)

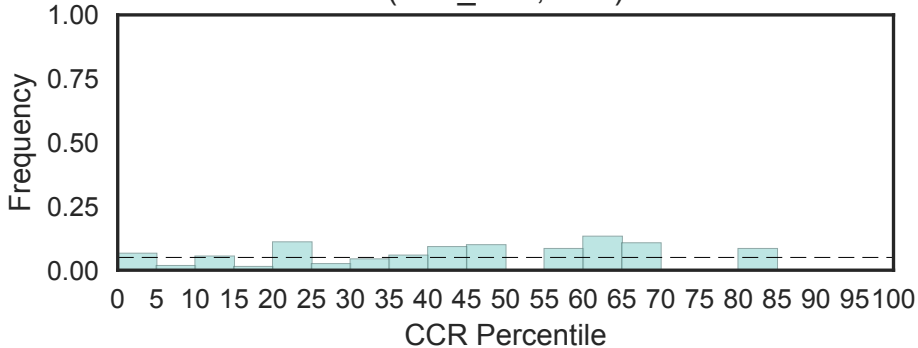

PKC-activated protein phosphatase-1 inhibitor  
(PP1\_inhibitor, N=5)

Fisher's OR: 1.1; Bonferroni p-val: 1

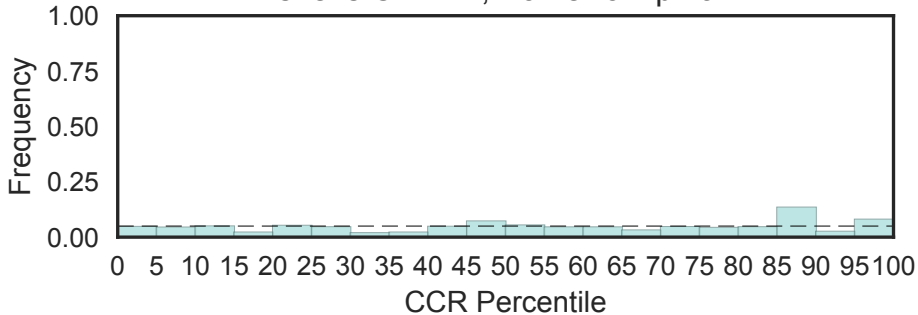

Phosphatase-1 catalytic subunit binding region  
(PP1c\_bdg, N=2)

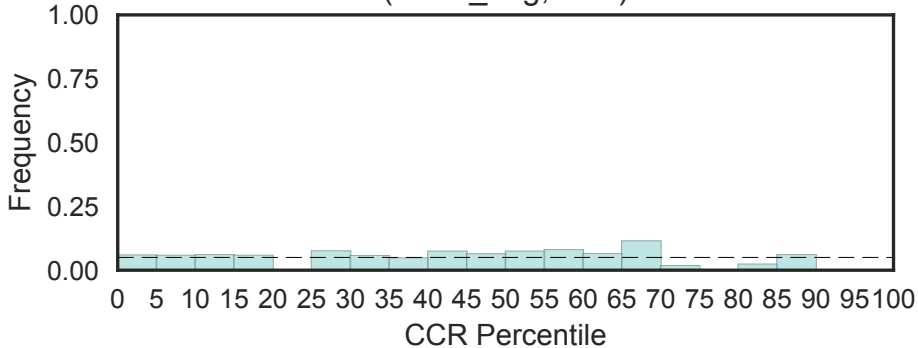

# Casein kinase substrate phosphoprotein PP28 (PP28, N=1)

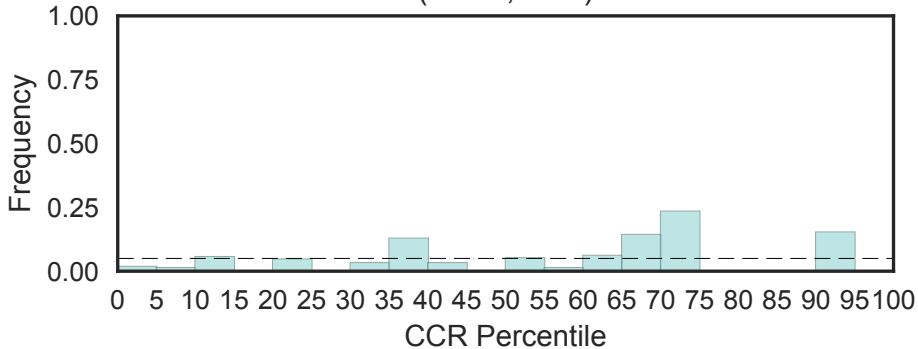



Protein phosphatase 2C  
(PP2C, N=24)

Fisher's OR: 2.39; Bonferroni p-val: 0.0627

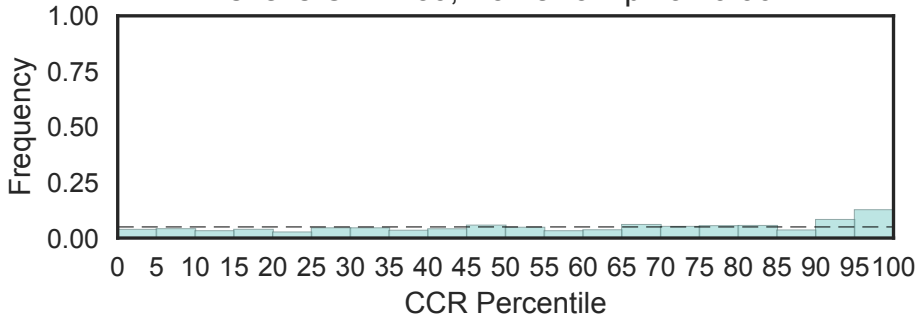

Protein phosphatase 2C  
(PP2C\_2, N=4)

Fisher's OR: 0; Bonferroni p-val: 1

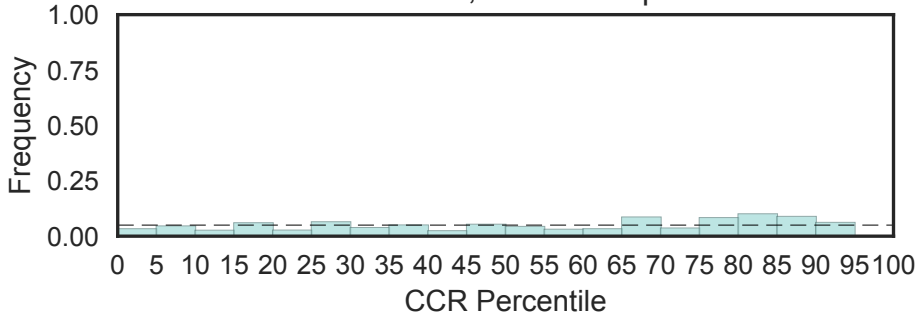

Protein serine/threonine phosphatase 2C, C-terminal domain  
(PP2C\_C, N=3)

Fisher's OR: 2.38; Bonferroni p-val: 1

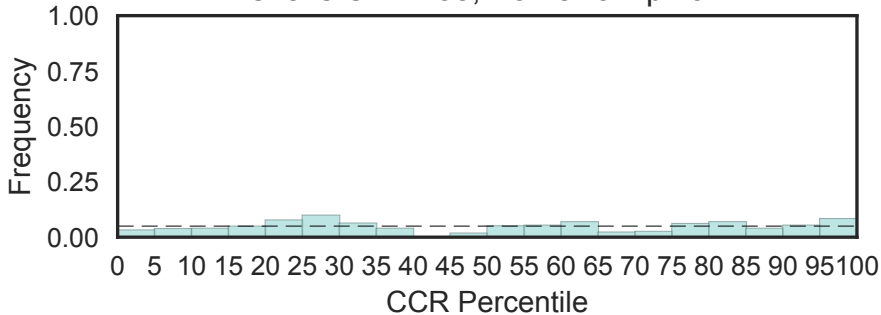

PPAK motif  
(PPAK, N=21)

Fisher's OR: 0; Bonferroni p-val: 1

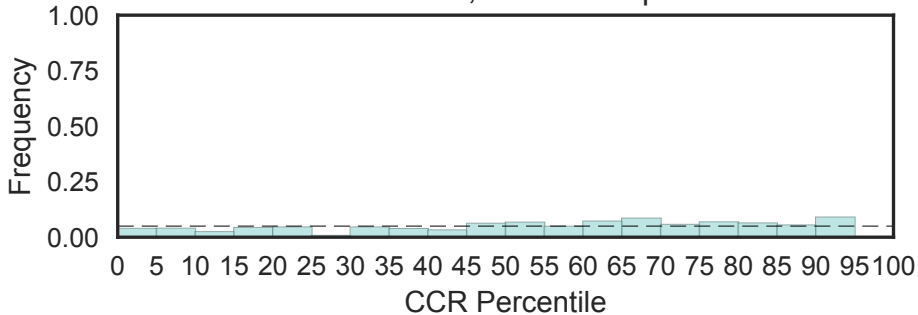

PPAR gamma N-terminal region  
(PPARgamma\_N, N=1)

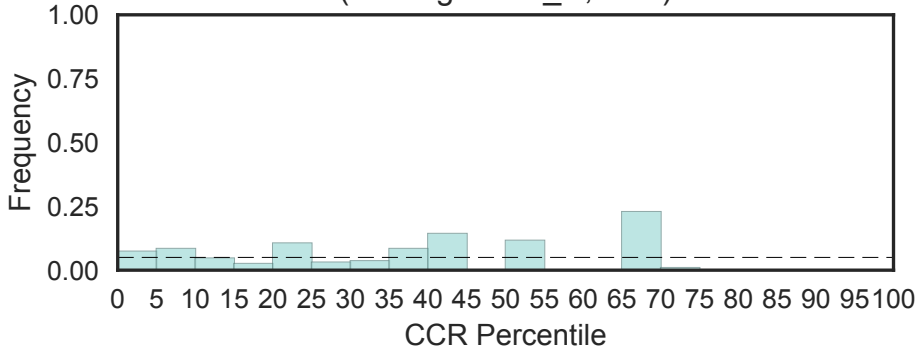

Differentiation and proliferation regulator  
(PPDFL, N=2)

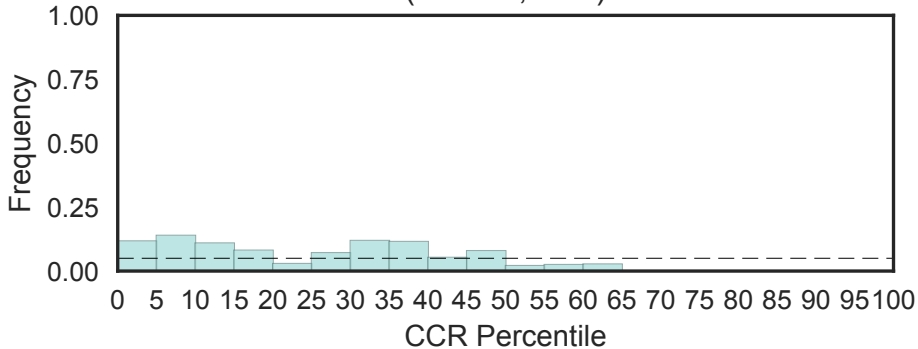

Protein phosphatase 1 regulatory subunit 32  
(PPP1R32, N=2)

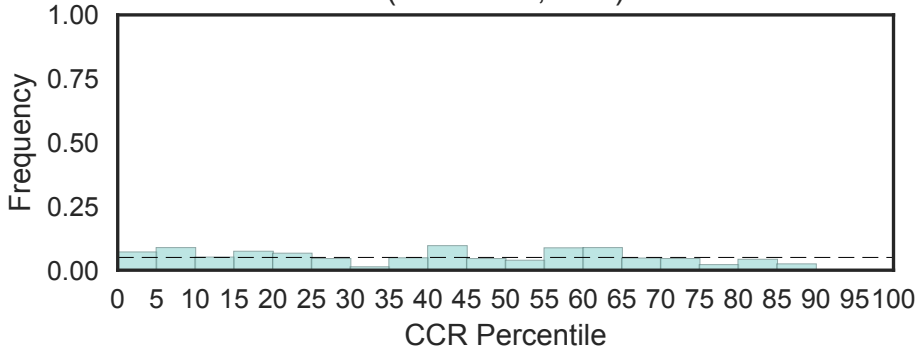

Protein phosphatase 1 regulatory subunit 35 C-terminus  
(PPP1R35\_C, N=1)

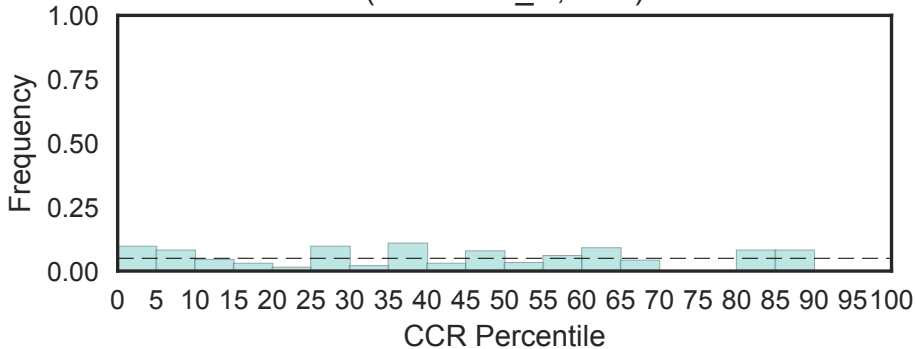



PPP4R2

(PPP4R2, N=3)

Fisher's OR: 0; Bonferroni p-val: 1

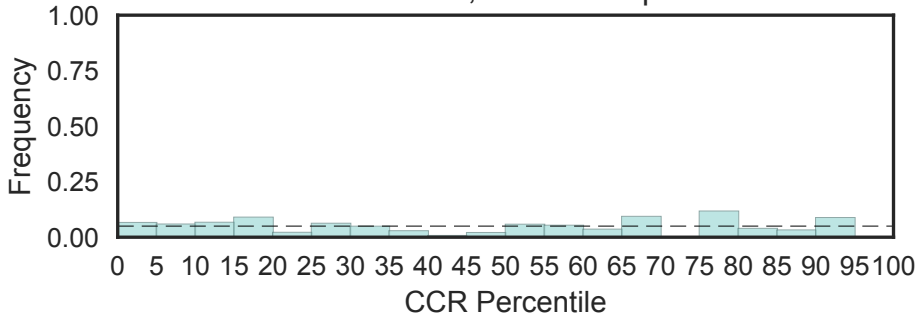

PPP5 TPR repeat region  
(PPP5, N=5)

Fisher's OR: 0; Bonferroni p-val: 1

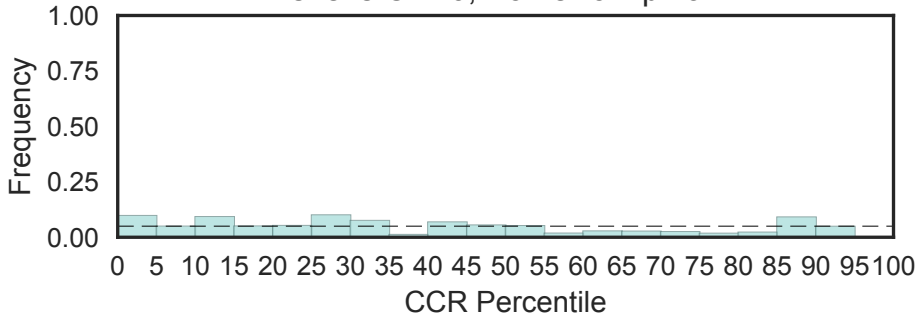

Protein phosphatase 1 inhibitor  
(PPPI\_inhib, N=1)

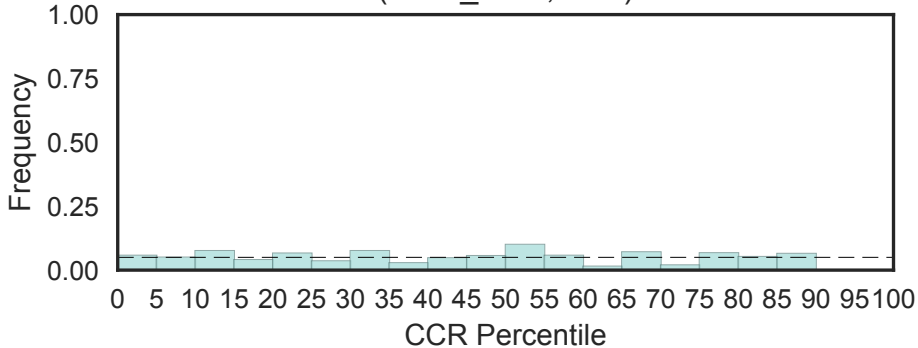

PPR repeat  
(PPR, N=25)

Fisher's OR: 2.81; Bonferroni p-val: 1

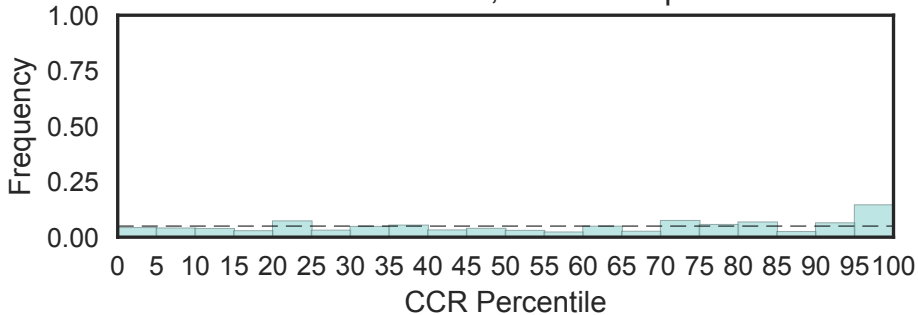

PPR repeat  
(PPR\_1, N=1)

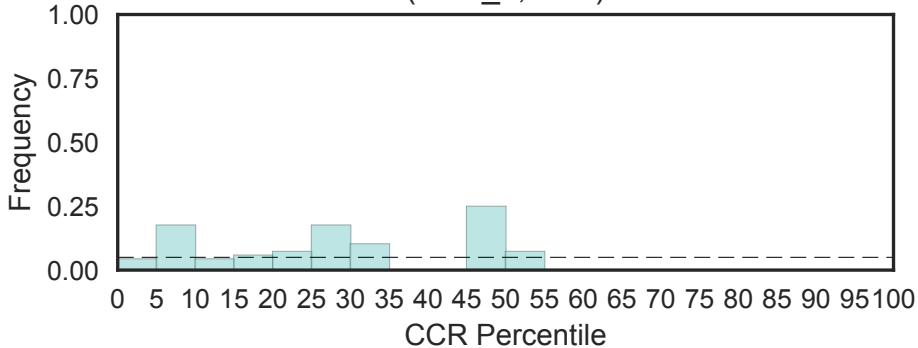

PPR repeat family  
(PPR\_2, N=3)

Fisher's OR: 0; Bonferroni p-val: 1

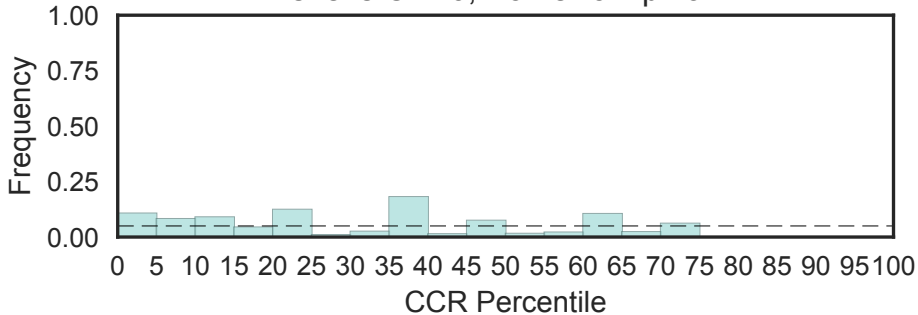

Pentatricopeptide repeat domain  
(PPR\_3, N=11)

Fisher's OR: 0; Bonferroni p-val: 1

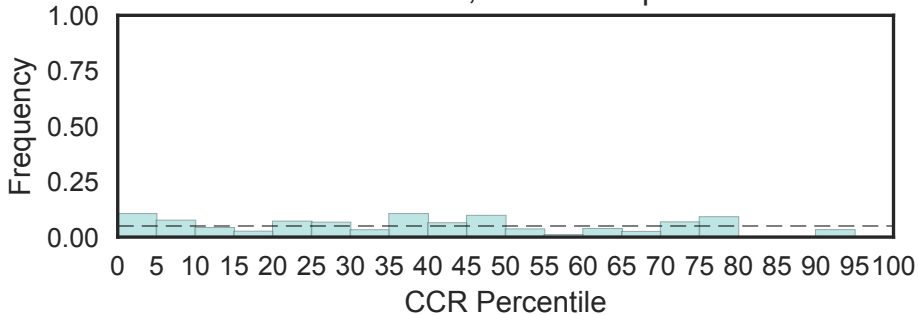

Pentacotriptide-repeat region of PRORP  
(PPR\_long, N=4)

Fisher's OR: 0; Bonferroni p-val: 1

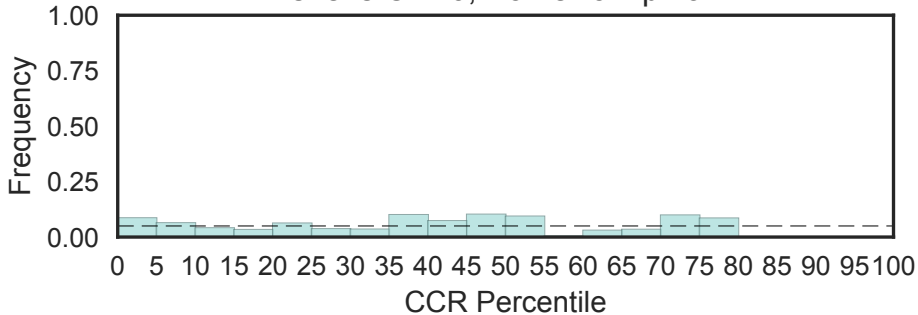



Protein prenyltransferase alpha subunit repeat  
(PPTA, N=15)

Fisher's OR: 2.8; Bonferroni p-val: 1

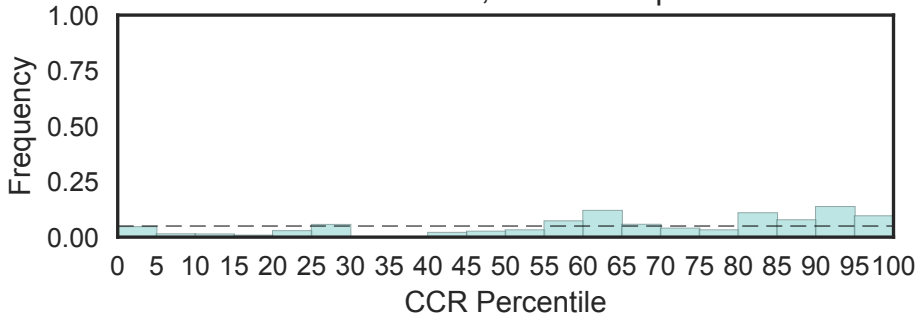

PQ loop repeat  
(PQ-loop, N=9)

Fisher's OR: 0; Bonferroni p-val: 1

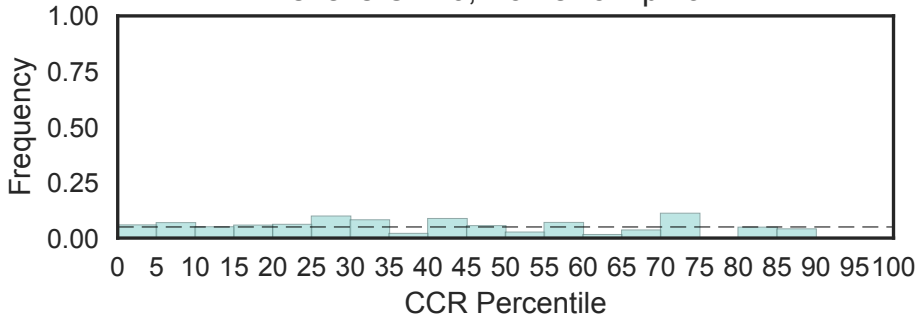

PQQ enzyme repeat  
(PQQ, N=1)

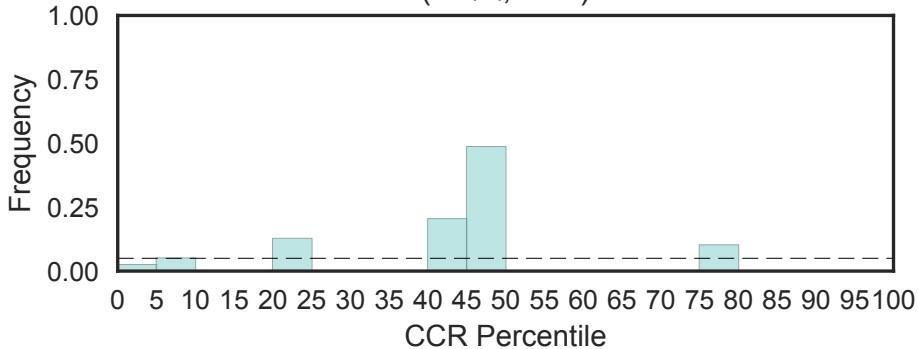

PQQ-like domain  
(PQQ\_2, N=4)

Fisher's OR: 3.79; Bonferroni p-val: 1

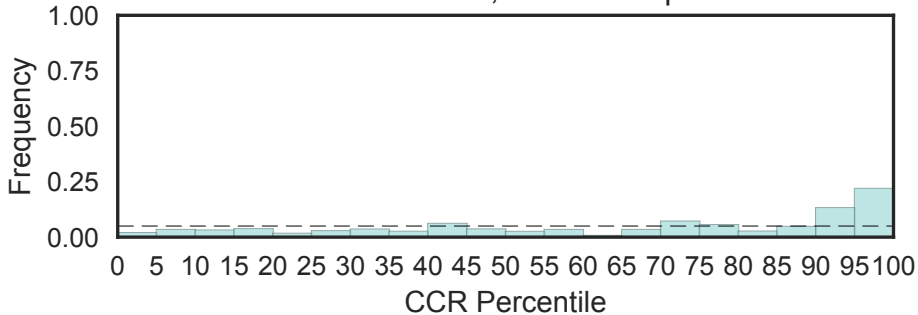

PQQ-like domain  
(PQQ\_3, N=2)

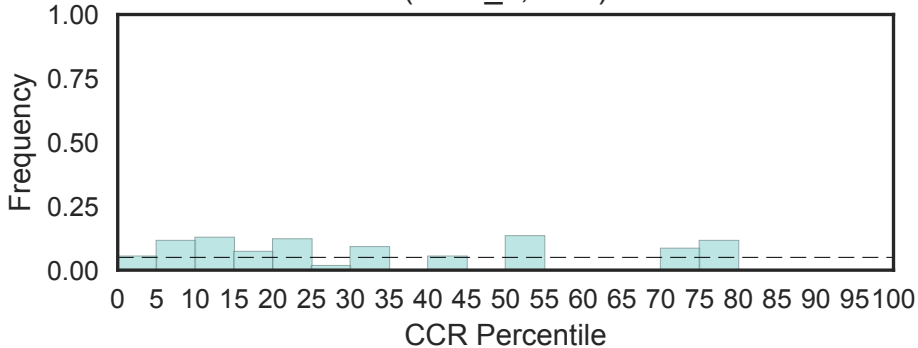

PRA1 family protein  
(PRA1, N=2)

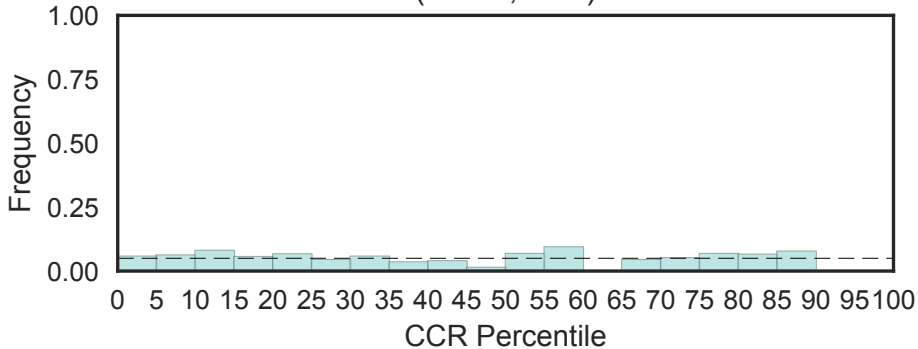

Proline-rich acidic protein 1, pregnancy-specific uterine  
(PRAP, N=2)

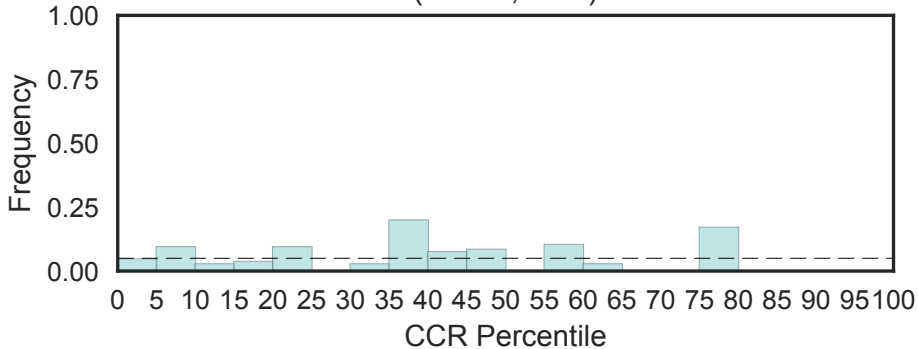

Proline-rich AKT1 substrate 1  
(PRAS, N=1)

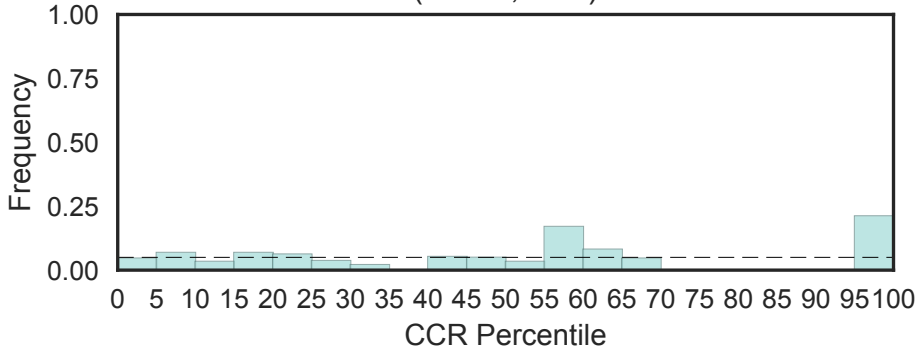



Mitotic checkpoint regulator, MAD2B-interacting  
(PRCC, N=1)

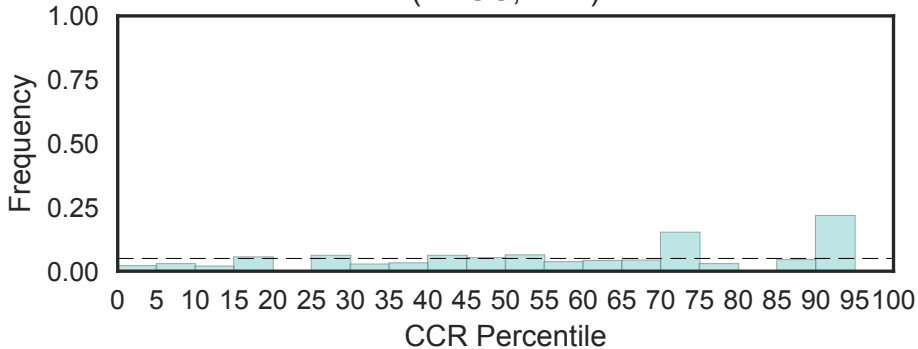

PRELI-like family  
(PRELI, N=6)

Fisher's OR: 0.329; Bonferroni p-val: 1

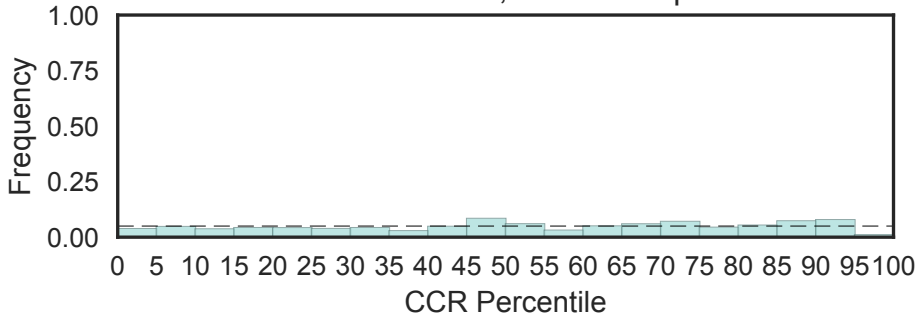

# Plethodontid receptivity factor PRF (PRF, N=1)

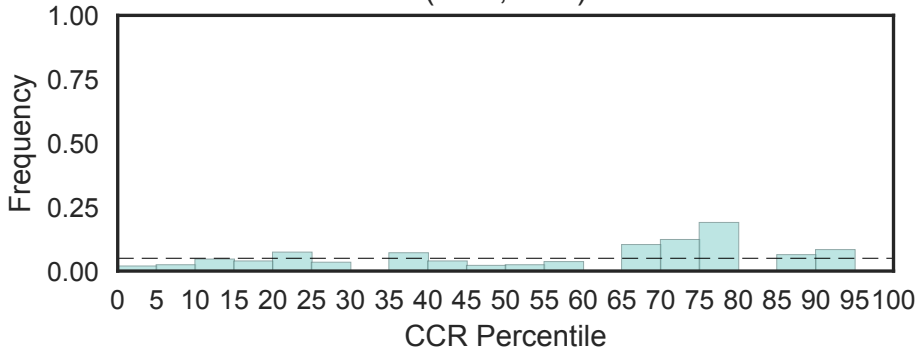

Proline-rich membrane anchor 1  
(PRIMA1, N=1)

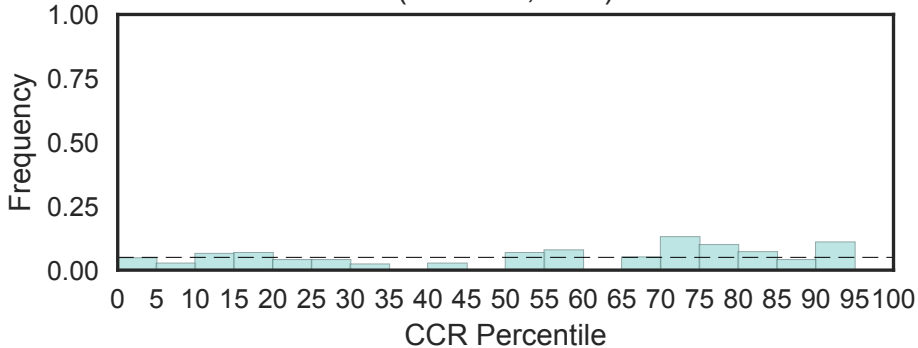

Phosphoribulokinase / Uridine kinase family  
(PRK, N=3)

Fisher's OR: 1.78; Bonferroni p-val: 1

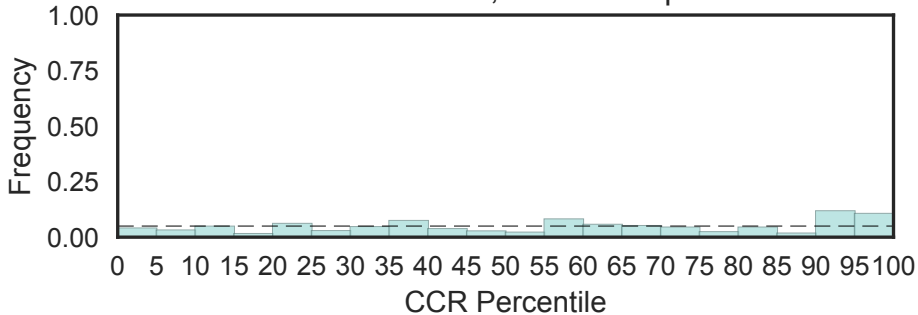

Glucosidase II beta subunit-like protein  
(PRKCSH, N=5)

Fisher's OR: 0; Bonferroni p-val: 1

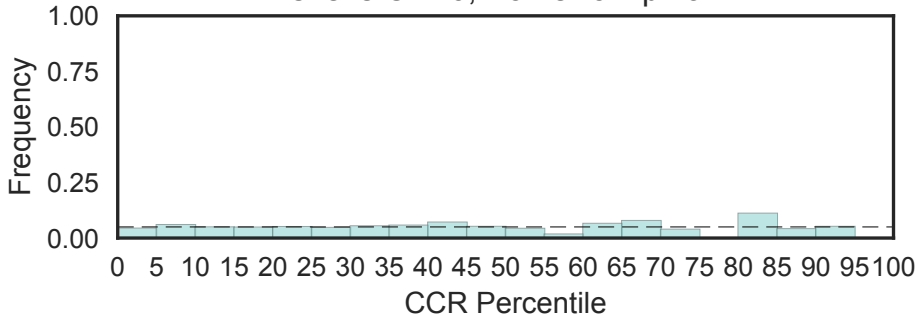

Glucosidase II beta subunit-like  
(PRKCSH-like, N=1)

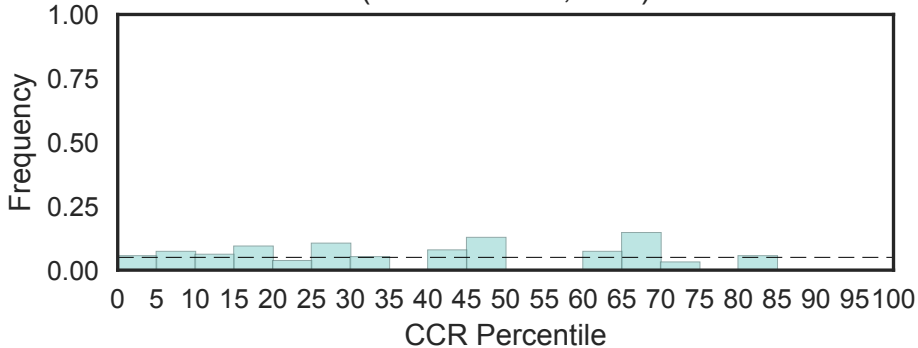

Glucosidase II beta subunit-like protein  
(PRKCSH\_1, N=3)

Fisher's OR: 0; Bonferroni p-val: 1

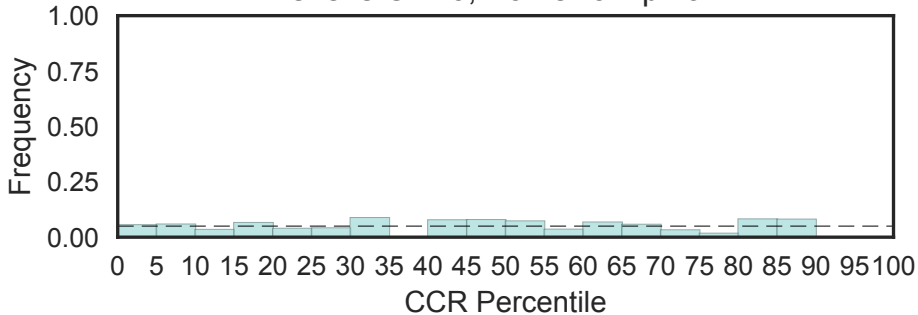



cGMP-dependent protein kinase interacting domain  
(PRKG1\_interact, N=3)

Fisher's OR: 2.06; Bonferroni p-val: 1

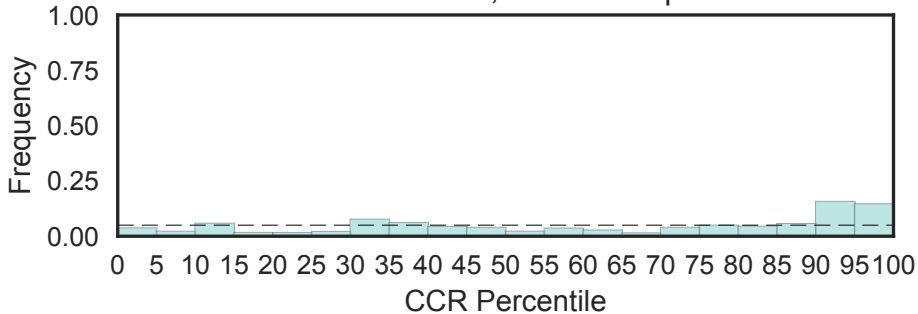

PRMT5 arginine-N-methyltransferase  
(PRMT5, N=2)

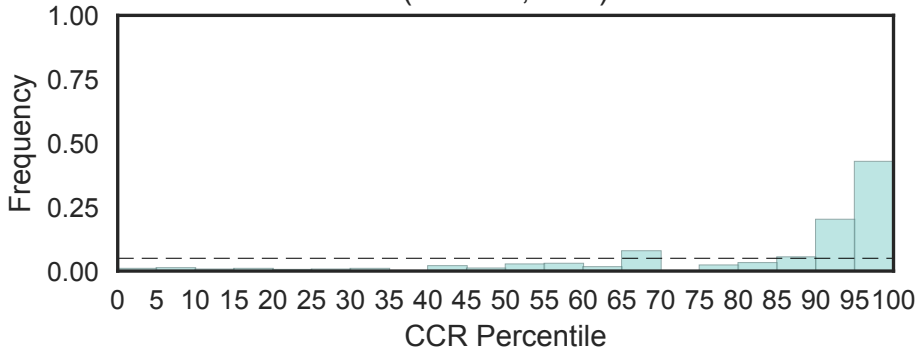

PRMT5 oligomerisation domain  
(PRMT5\_C, N=1)

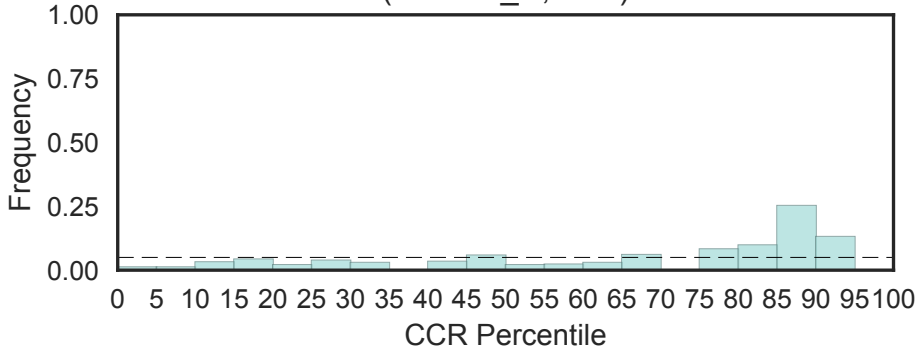

PRMT5 TIM barrel domain  
(PRMT5\_TIM, N=1)

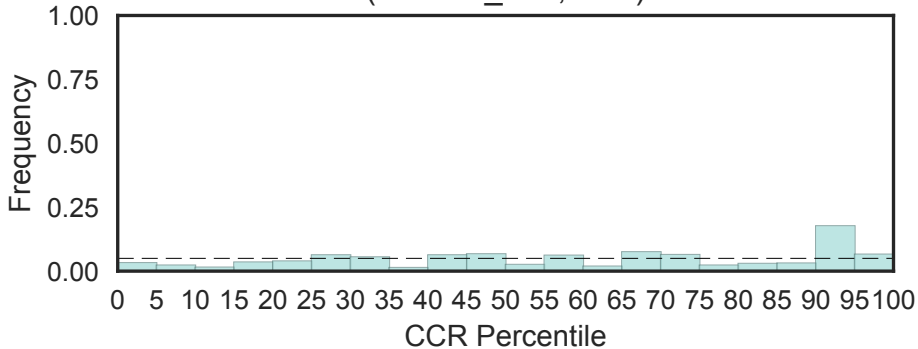

PRO8NT (NUC069), PrP8 N-terminal domain  
(PRO8NT, N=1)

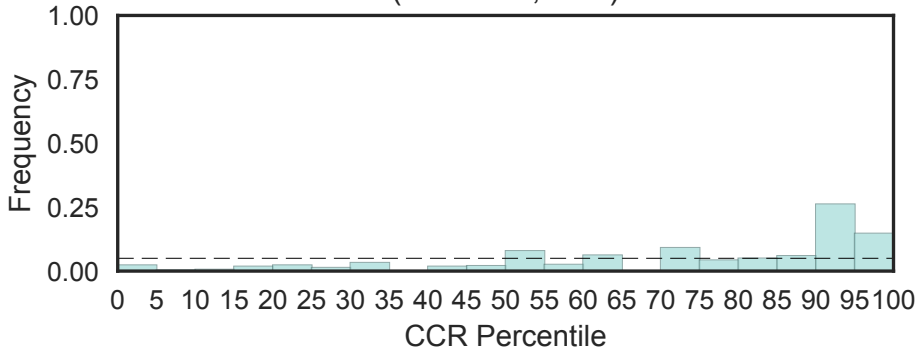

PROCN (NUC071) domain  
(PROCN, N=1)

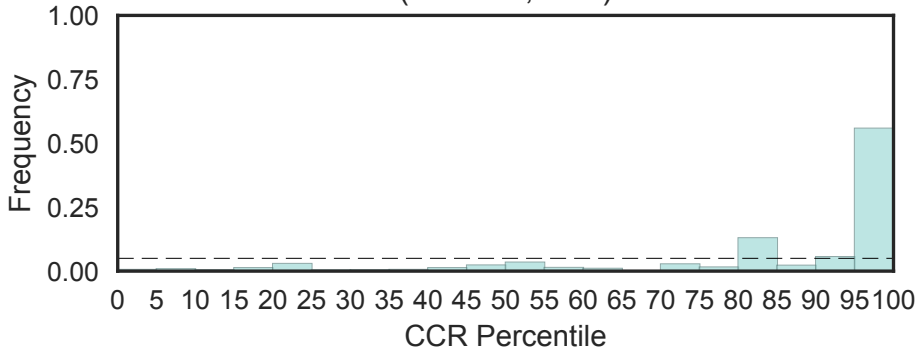

PROCT (NUC072) domain  
(PROCT, N=1)

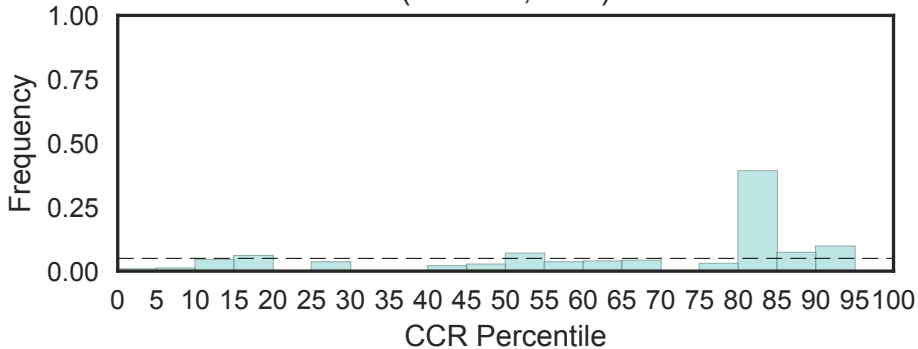

Proline-rich submaxillary gland androgen-regulated family  
(PROL5-SMR, N=4)

Fisher's OR: 0; Bonferroni p-val: 1

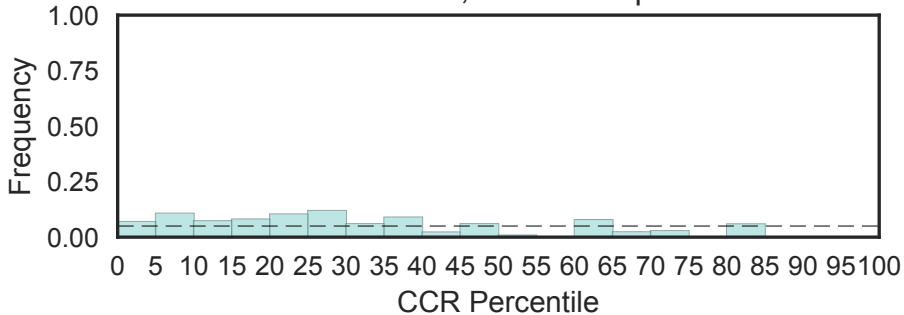



Protein-only RNase P  
(PRORP, N=1)

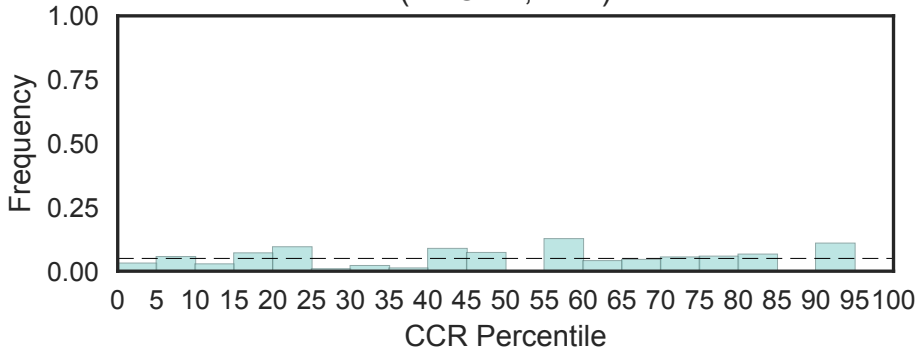

PRP1 splicing factor, N-terminal  
(PRP1\_N, N=1)

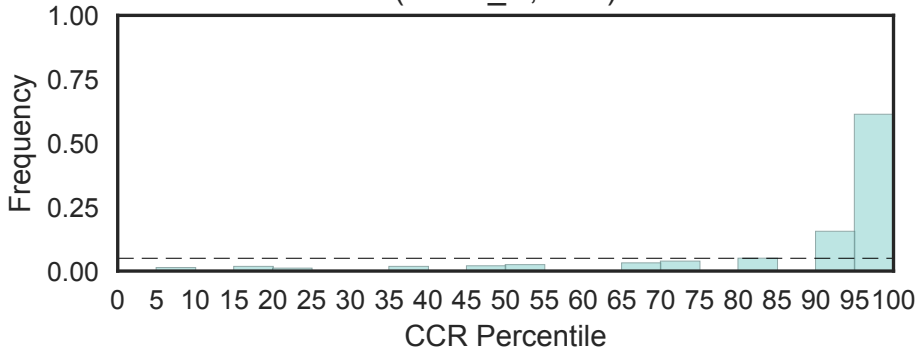

Pre-mRNA splicing factor PRP21 like protein  
(PRP21\_like\_P, N=1)

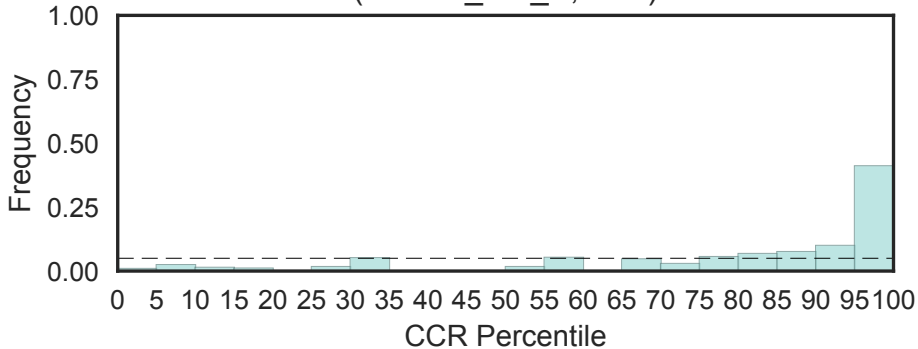

pre-mRNA processing factor 3 (PRP3)  
(PRP3, N=1)

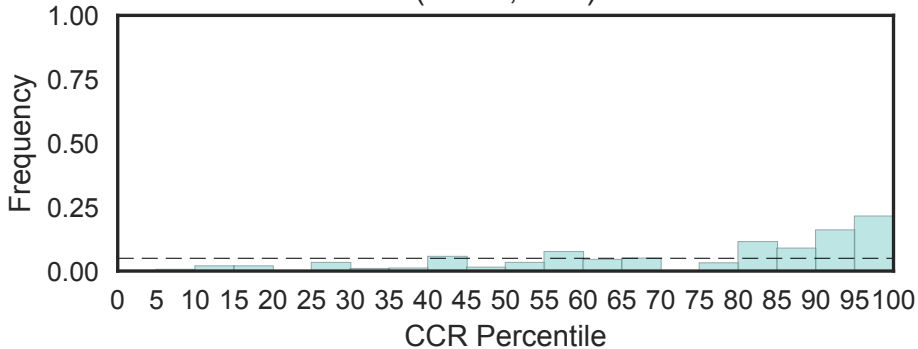

PRP38 family  
(PRP38, N=3)

Fisher's OR: 13.5; Bonferroni p-val: 0.0116

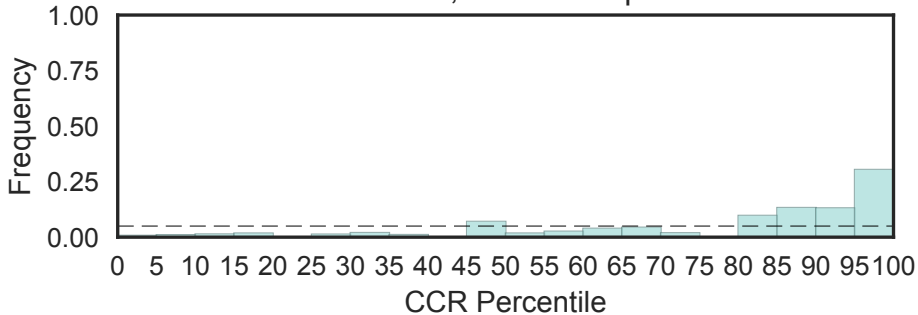

# Pre-mRNA-splicing factor 38-associated hydrophilic C-term (PRP38\_assoc, N=1)

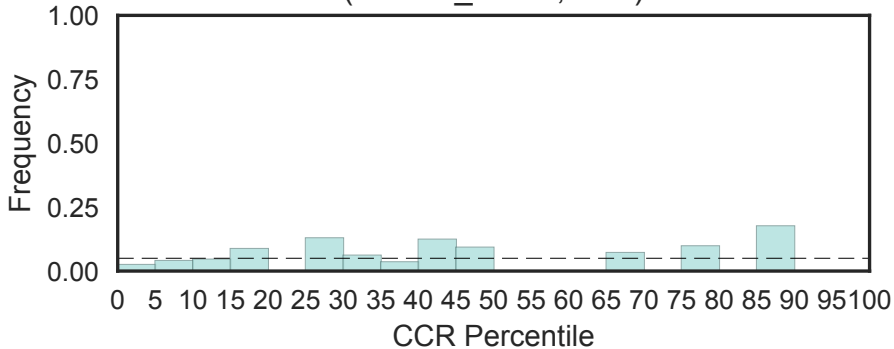

pre-mRNA processing factor 4 (PRP4) like  
(PRP4, N=2)

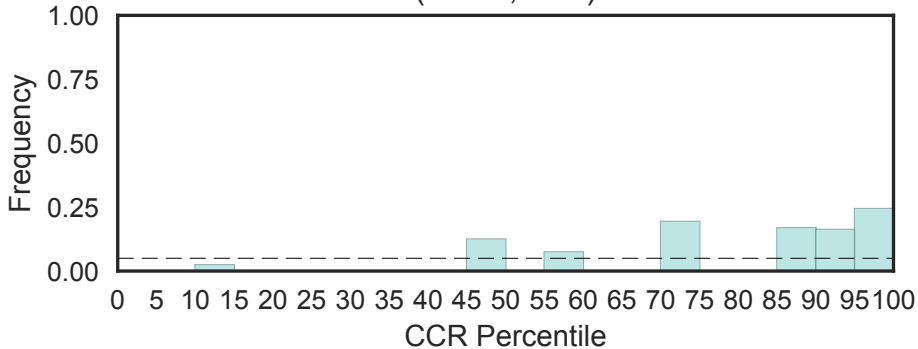

PRP8 domain IV core  
(PRP8\_domainIV, N=1)

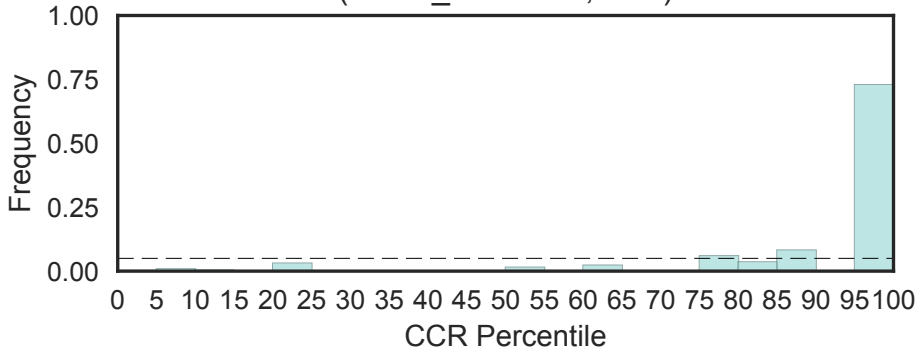



Proline-rich protein family 18  
(PRR18, N=1)

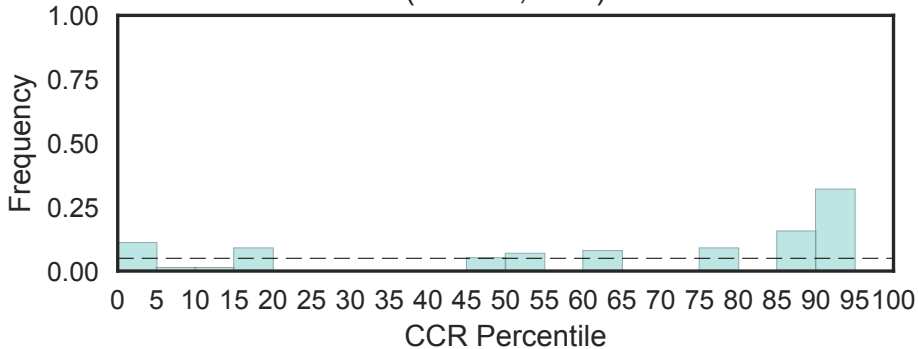

Proline-rich protein family 22  
(PRR22, N=2)

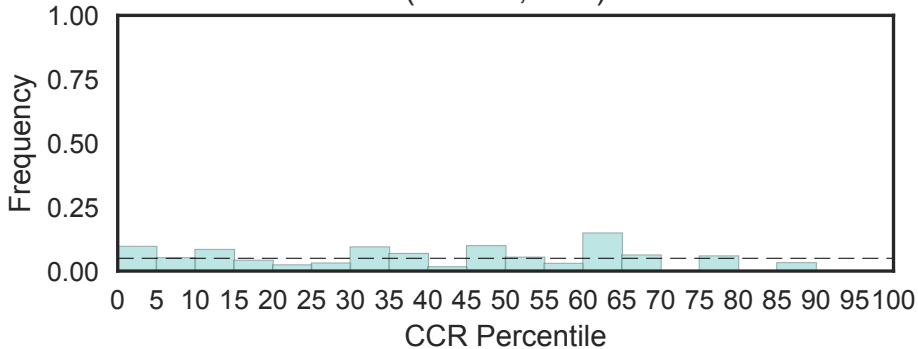

Plant phosphoribosyltransferase C-terminal  
(PRT\_C, N=2)

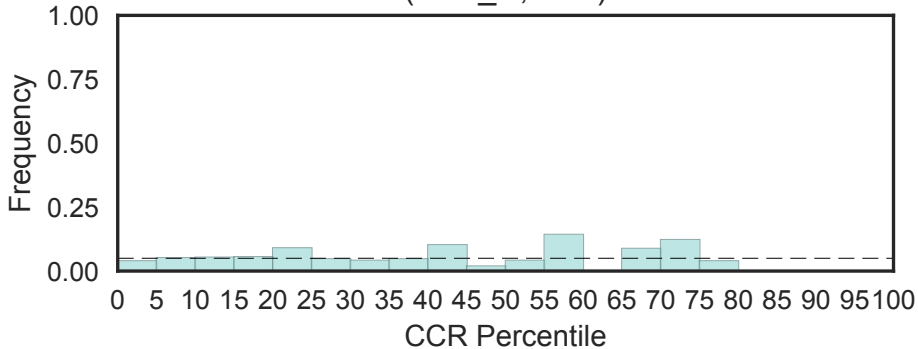

SPRY-associated domain  
(PRY, N=44)

Fisher's OR: 0.403; Bonferroni p-val: 1

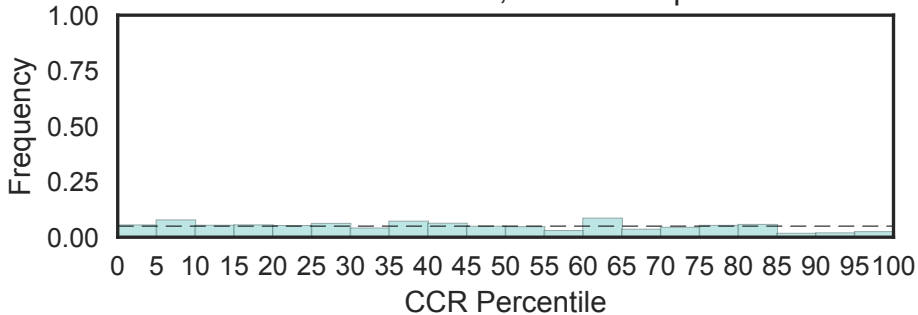

Polyketide synthase dehydratase  
(PS-DH, N=1)

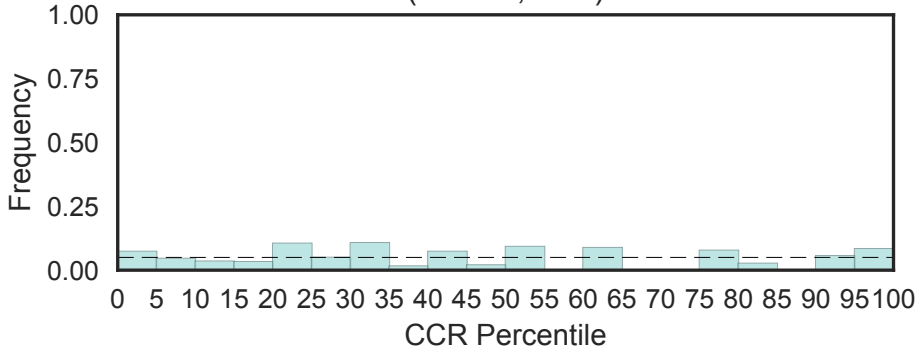

Plexin repeat  
(PSI, N=29)

Fisher's OR: 1.46; Bonferroni p-val: 1

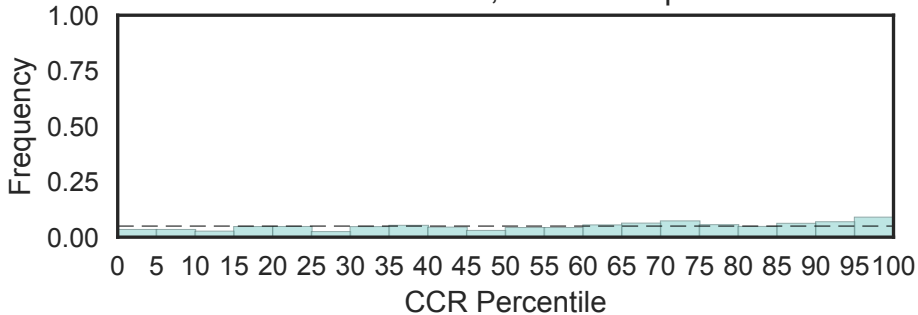

Integrin plexin domain  
(PSI\_integrin, N=9)

Fisher's OR: 0; Bonferroni p-val: 1

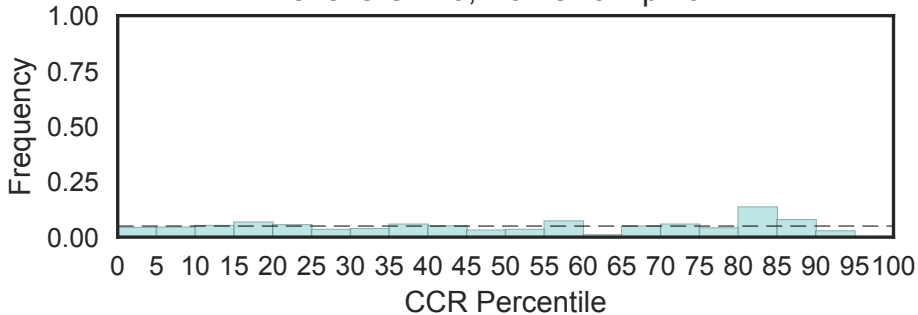

PSP  
(PSP, N=2)

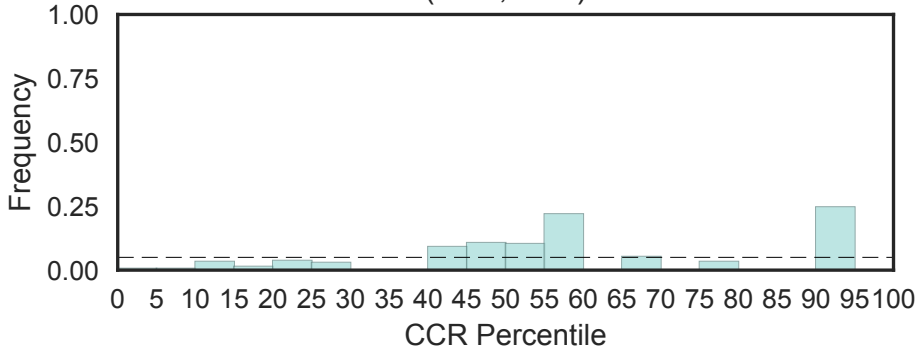



Beta-microseminoprotein (PSP-94)  
(PSP94, N=3)

Fisher's OR: 0; Bonferroni p-val: 1

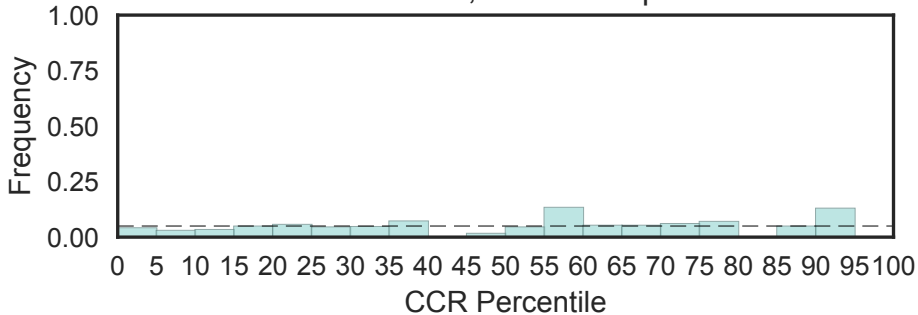

# Phosphatidyl serine synthase (PSS, N=2)

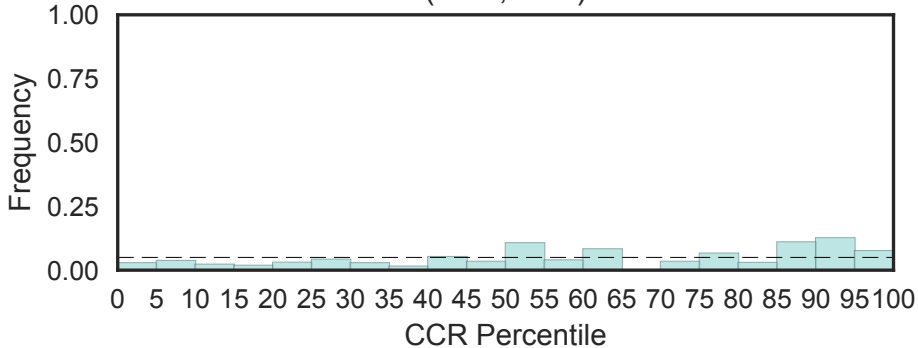

Phosphatidylserine decarboxylase  
(PS\_Dcarbxyase, N=1)

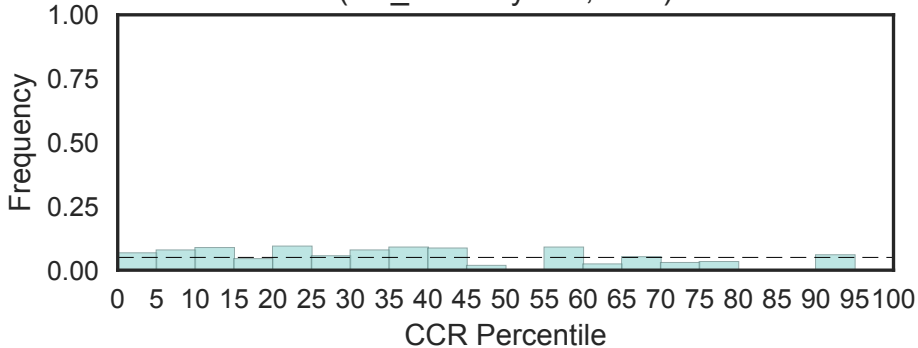

Phosphotyrosine-binding domain  
(PTB, N=16)

Fisher's OR: 0.445; Bonferroni p-val: 1

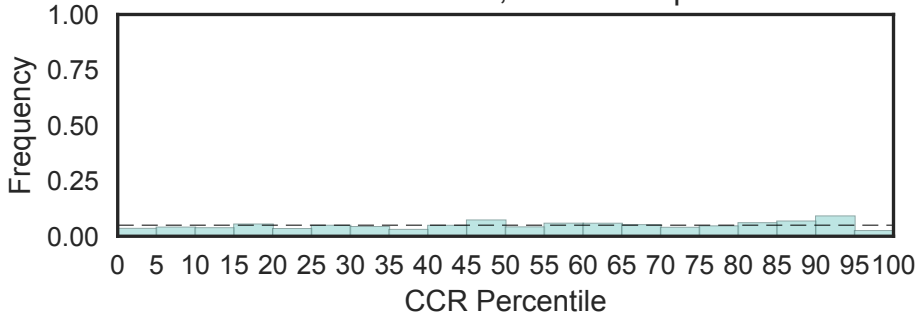

twin BRCT domain  
(PTCB-BRCT, N=12)

Fisher's OR: 3.05; Bonferroni p-val: 1

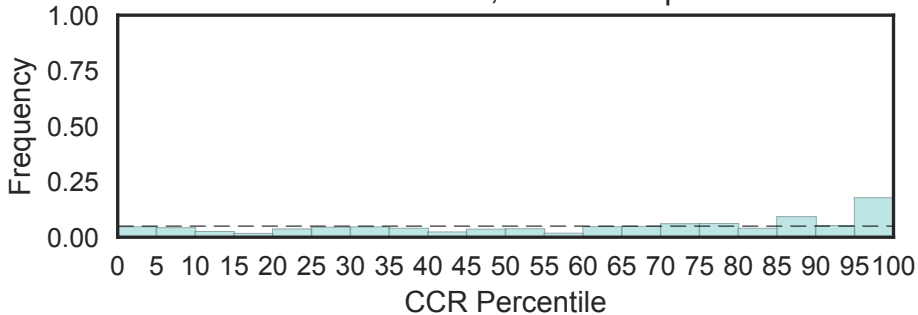

Pre-T-cell antigen receptor  
(PTCRA, N=1)

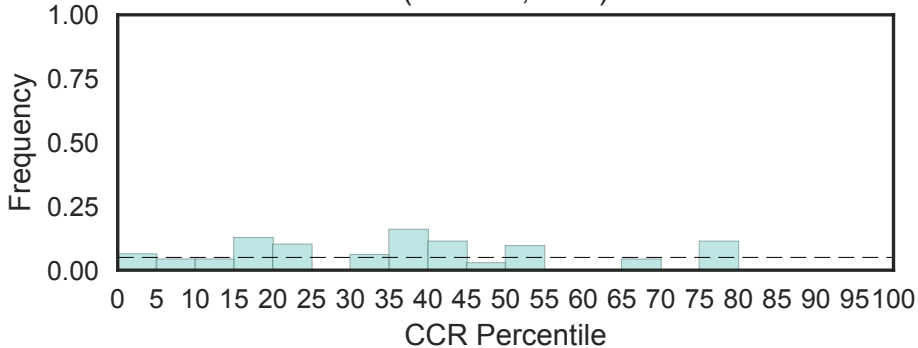

# Phosphotriesterase family (PTE, N=1)

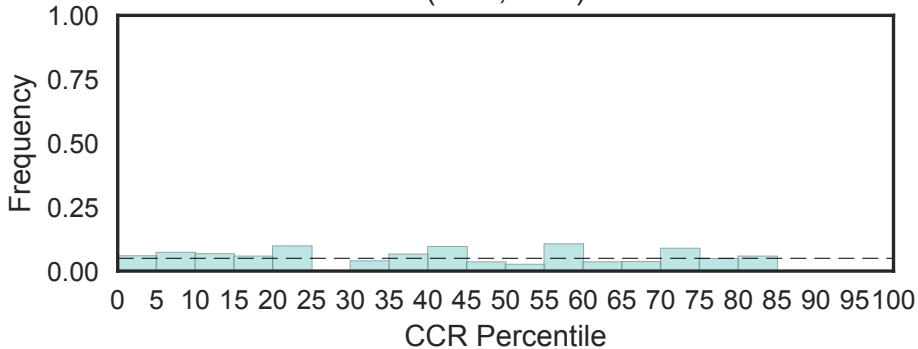

C2 domain of PTEN tumour-suppressor protein  
(PTEN\_C2, N=8)

Fisher's OR: 2.41; Bonferroni p-val: 1

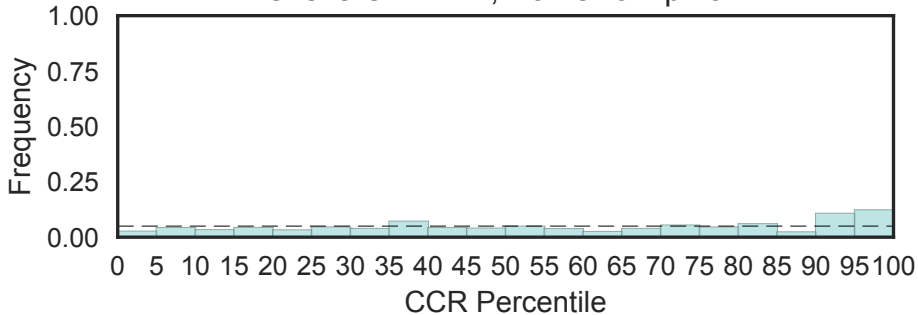



Peptidyl-tRNA hydrolase PTH2  
(PTH2, N=2)

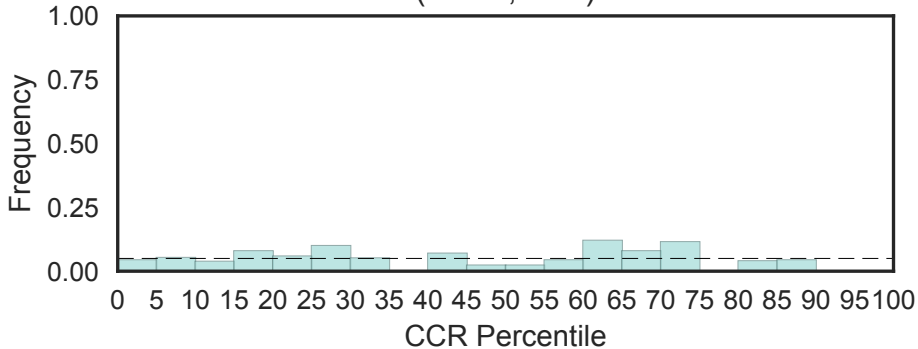

# Unstructured linker region on PTN13 protein between PDZ (PTN13\_u3, N=1)

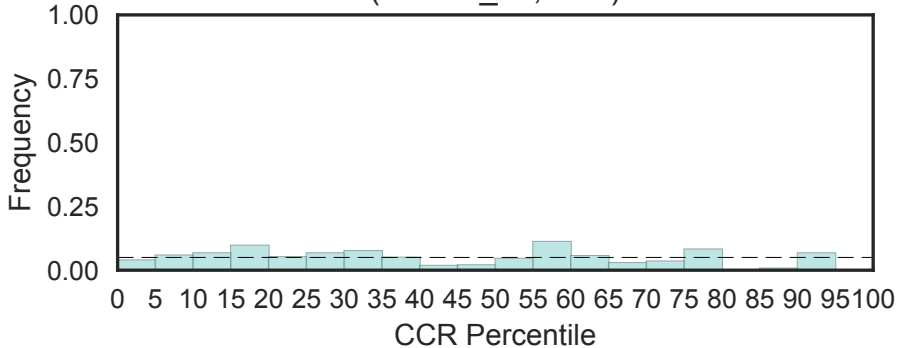

PTN/MK heparin-binding protein family, C-terminal domain  
(PTN\_MK\_C, N=2)

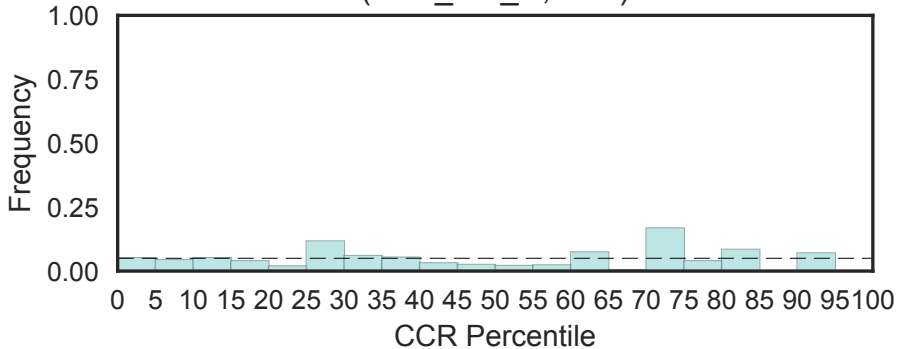

PTN/MK heparin-binding protein family, N-terminal domain  
(PTN\_MK\_N, N=2)

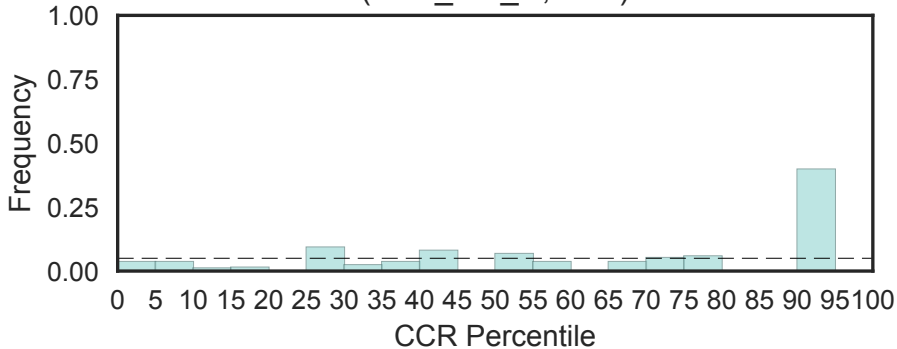

# Phosphotyrosyl phosphate activator (PTPA) protein (PTPA, N=1)

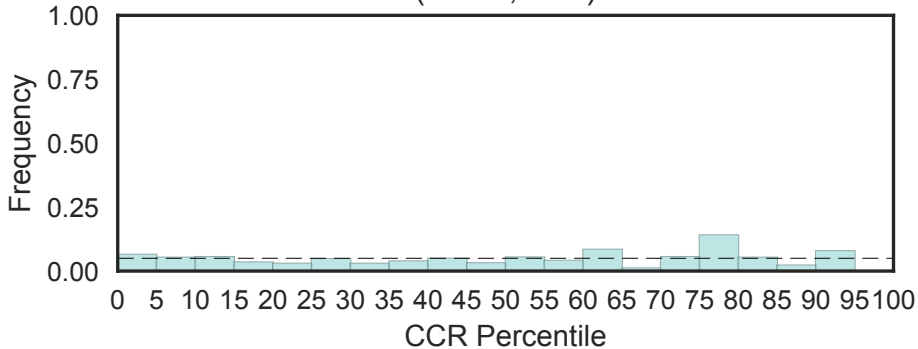

Protein tyrosine phosphatase-like protein, PTPLA  
(PTPLA, N=4)

Fisher's OR: 1.47; Bonferroni p-val: 1

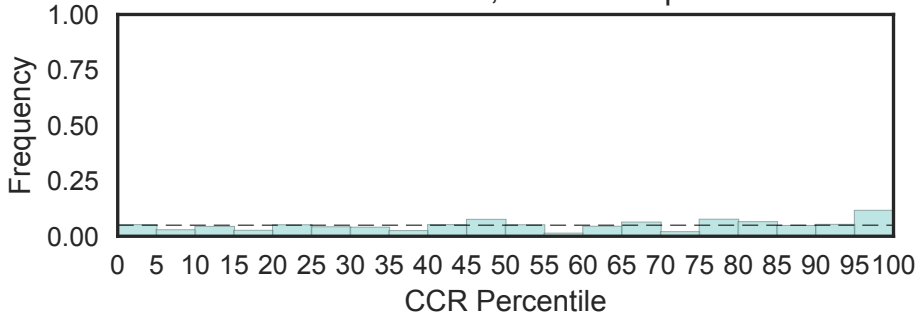

Protein tyrosine phosphatase receptor type C-associated  
(PTPRCAP, N=1)

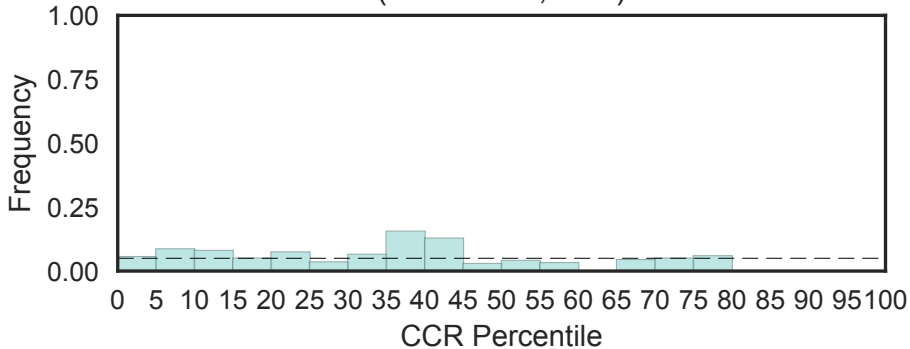

# 6-pyruvoyl tetrahydropterin synthase (PTPS, N=1)

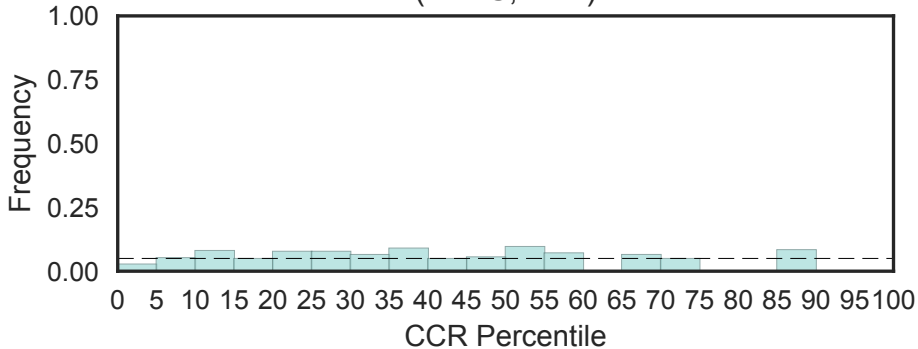



Protein tyrosine phosphatase N terminal  
(PTP\_N, N=1)

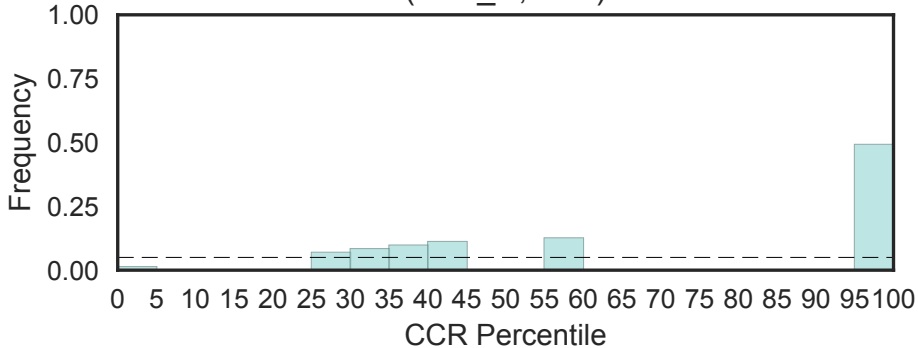

Inositol hexakisphosphate  
(PTPlike\_phytase, N=5)  
Fisher's OR: 0; Bonferroni p-val: 1

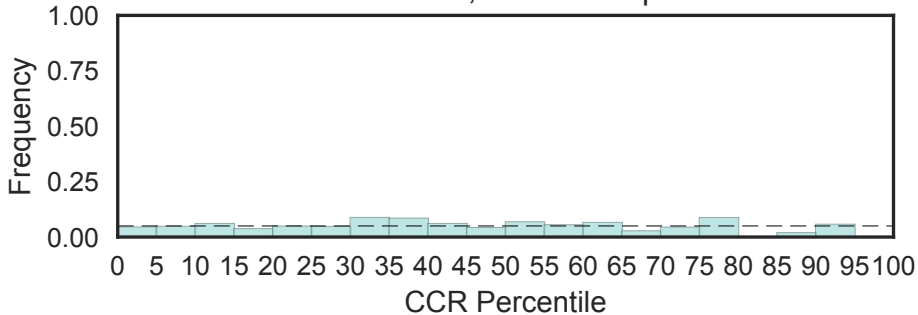

POT family  
(PTR2, N=7)

Fisher's OR: 0; Bonferroni p-val: 1

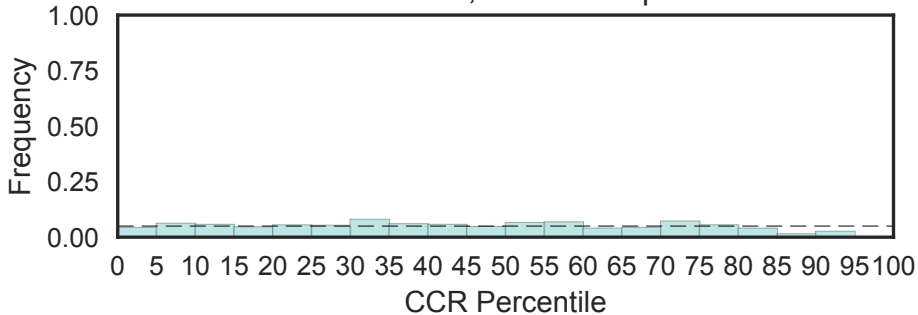

PTRF/SDPR family  
(PTRF\_SDPR, N=5)

Fisher's OR: 0; Bonferroni p-val: 1

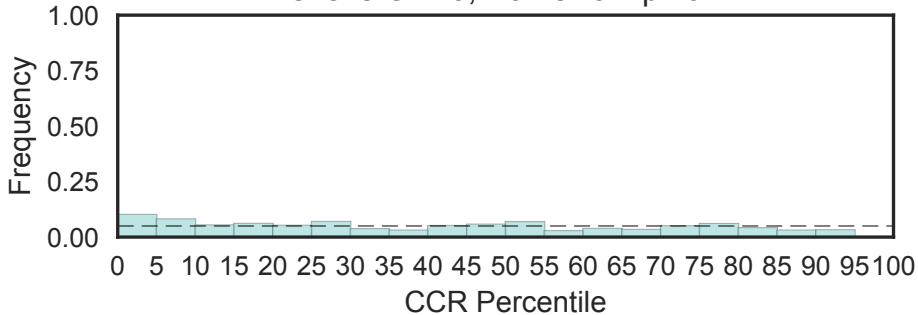

RNA 2'-phosphotransferase, Tpt1 / KptA family  
(PTS\_2-RNA, N=1)

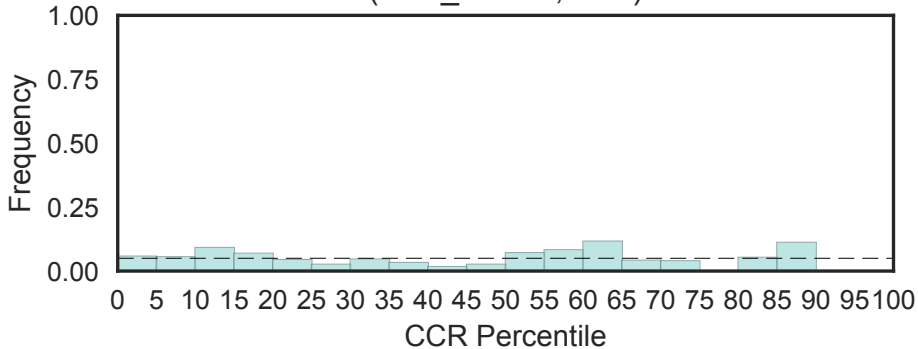

PUA-like domain  
(PUA\_2, N=2)

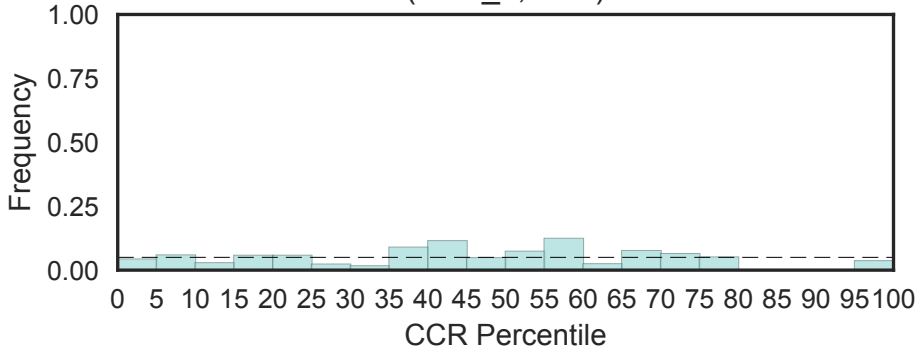

PUB domain  
(PUB, N=3)

Fisher's OR: 0; Bonferroni p-val: 1

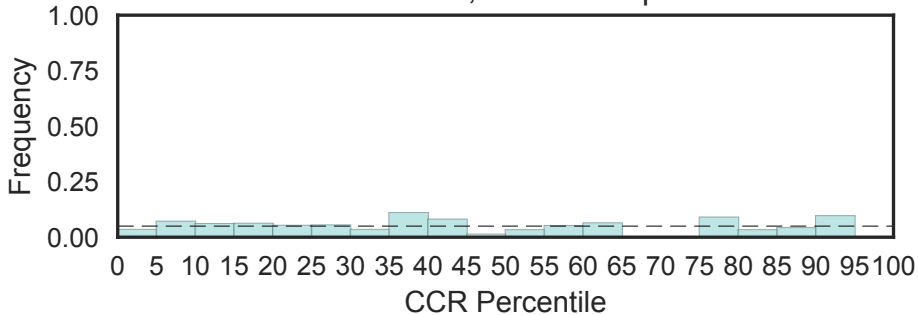

Pumilio-family RNA binding repeat  
(PUF, N=16)

Fisher's OR: 4.62; Bonferroni p-val: 1

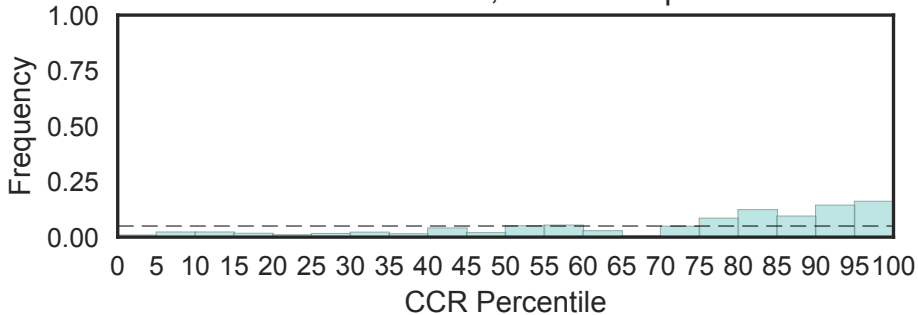



PUL domain  
(PUL, N=1)

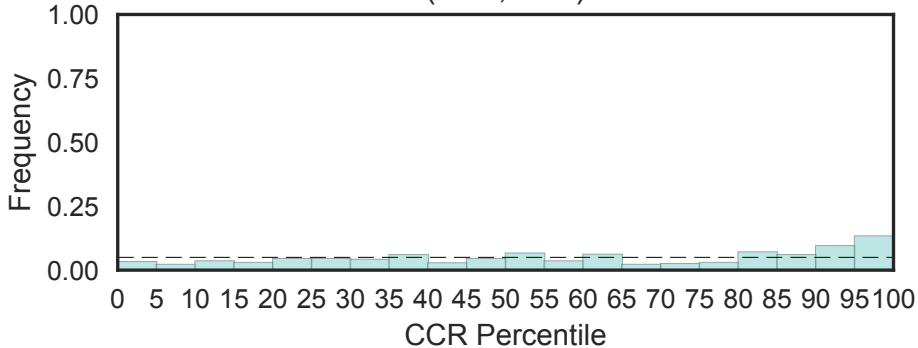

# Bcl-2-binding component 3, p53 upregulated modulator of apoptosis (PUMA, N=1)

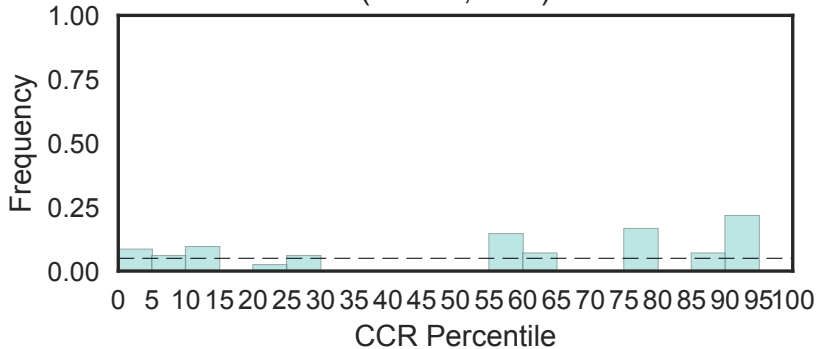

PV-1 protein (PLVAP)  
(PV-1, N=1)

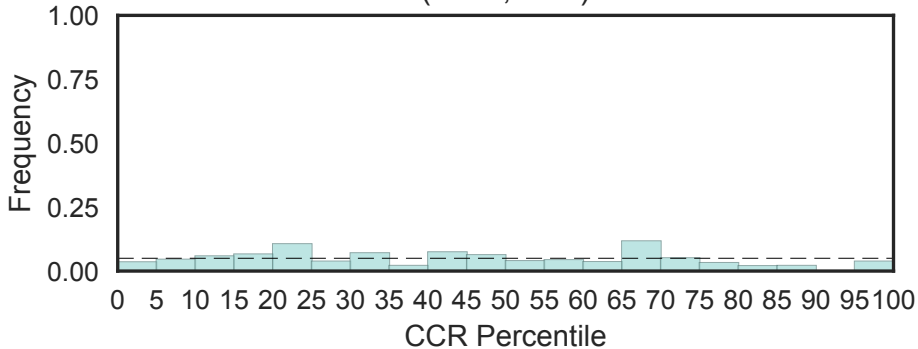

PWI domain  
(PWI, N=5)

Fisher's OR: 19.7; Bonferroni p-val: 0.000158

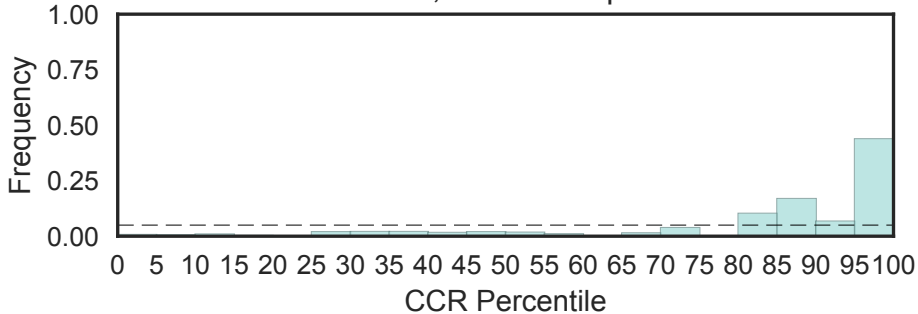

PWWP domain  
(PWWP, N=25)

Fisher's OR: 3.61; Bonferroni p-val: 0.0382

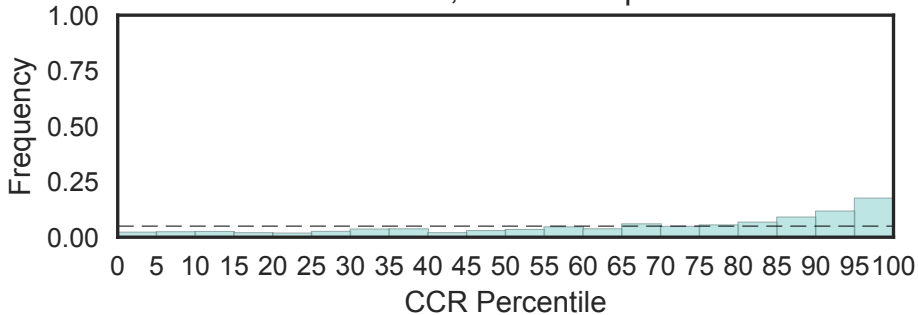

PX domain  
(PX, N=50)

Fisher's OR: 0.337; Bonferroni p-val: 1

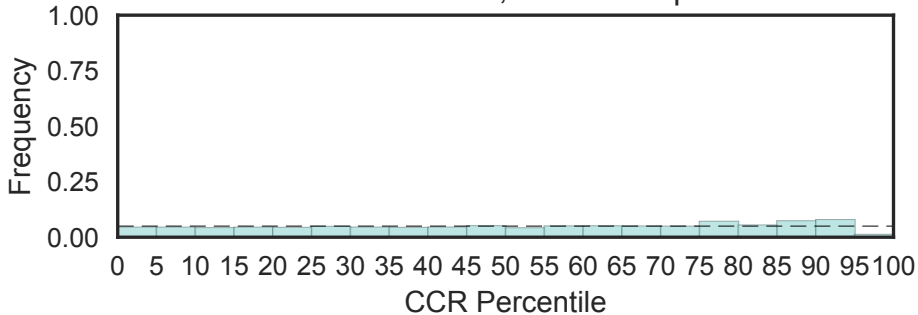

PXA domain  
(PXA, N=4)

Fisher's OR: 1.8; Bonferroni p-val: 1

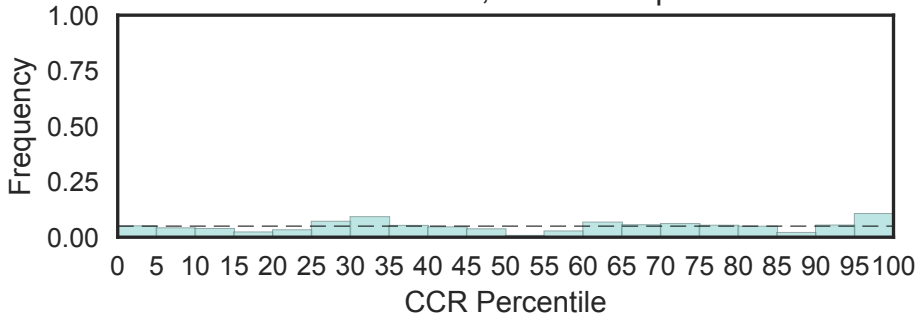

Peroxisomal testis-specific protein 1  
(PXT1, N=1)

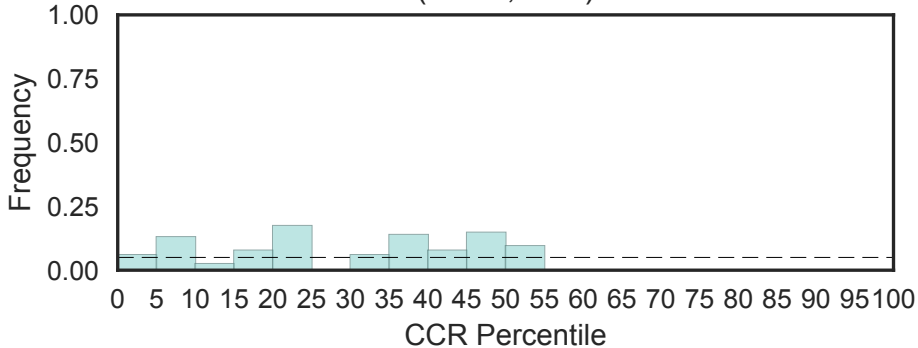



Conserved carboxylase domain  
(PYC\_OADA, N=1)

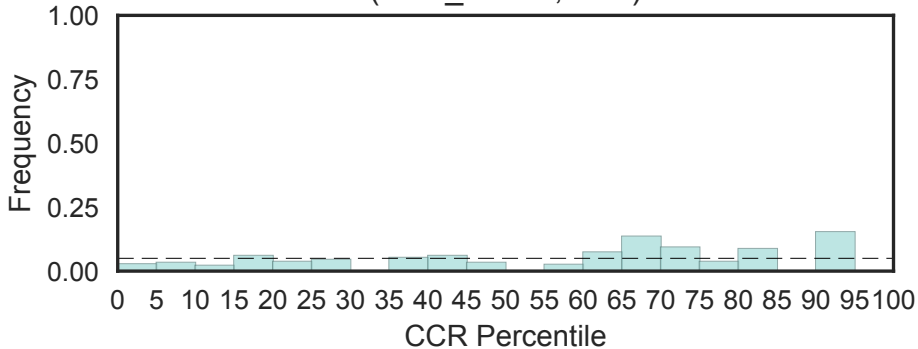

Pyrimidine nucleoside phosphorylase C-terminal domain  
(PYNP\_C, N=1)

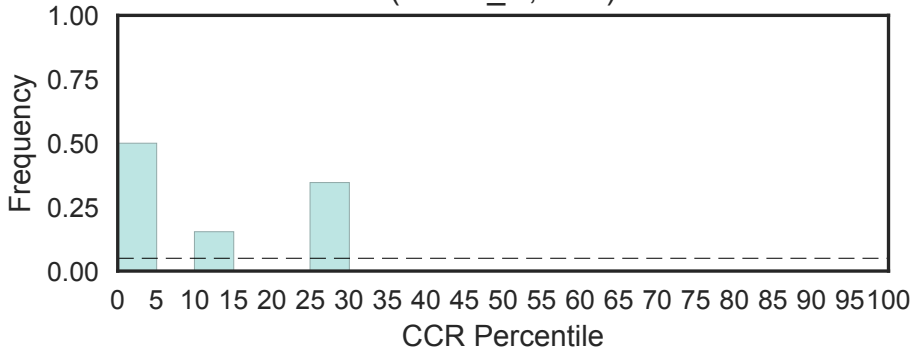

PAAD/DAPIN/Pyrin domain  
(PYRIN, N=23)

Fisher's OR: 0.154; Bonferroni p-val: 1

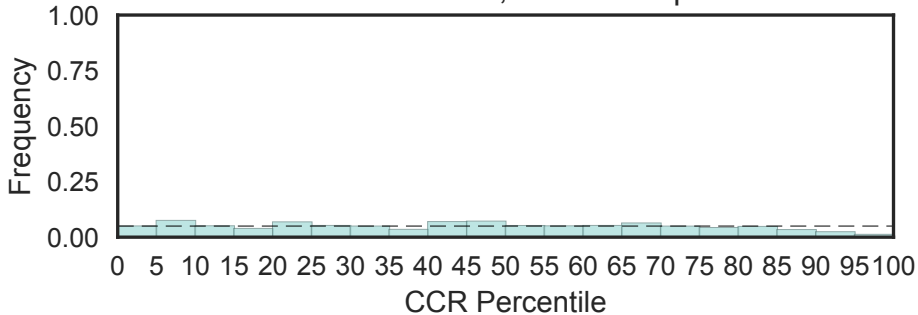

Protein C10  
(P\_C10, N=1)

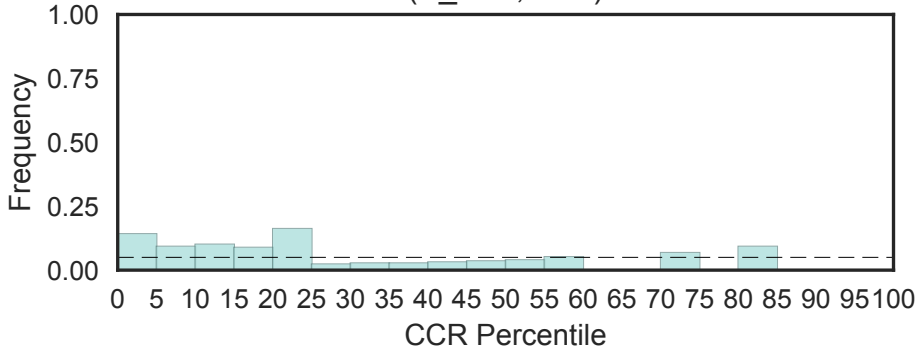

Proprotein convertase P-domain  
(P\_protein, N=7)  
Fisher's OR: 2.28; Bonferroni p-val: 1

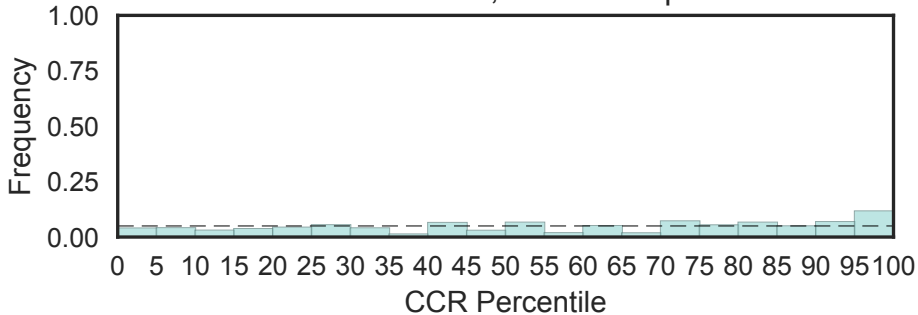

Solute carrier (proton/amino acid symporter), TRAMD3 or PAT1  
(PaaSYMP, N=2)

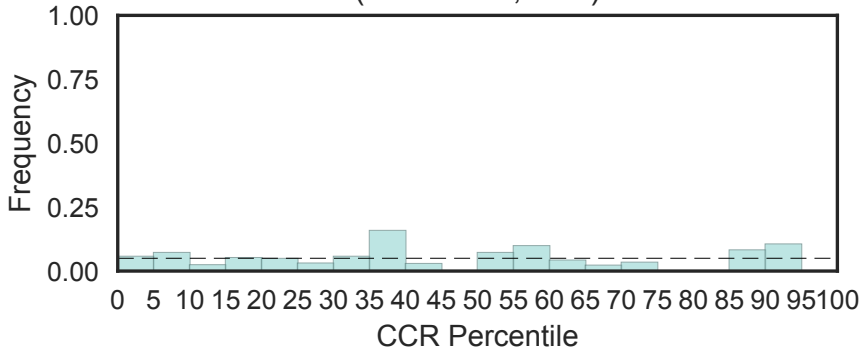

PACS-1 cytosolic sorting protein  
(Pacs-1, N=2)

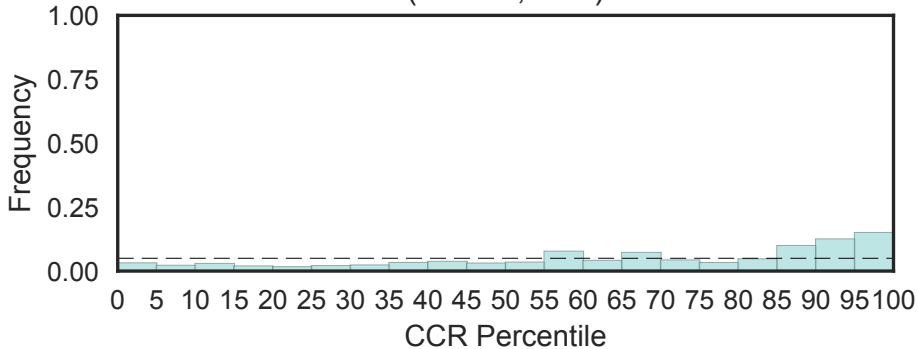

Paf1  
(Paf1, N=1)

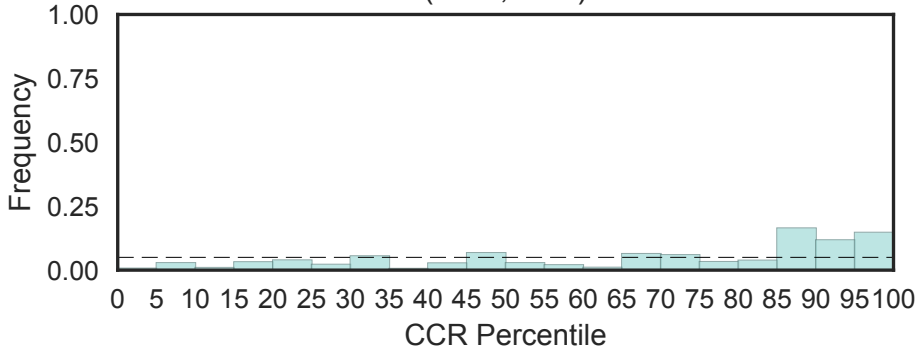



RNA polymerase I-associated factor PAF67  
(Paf67, N=1)

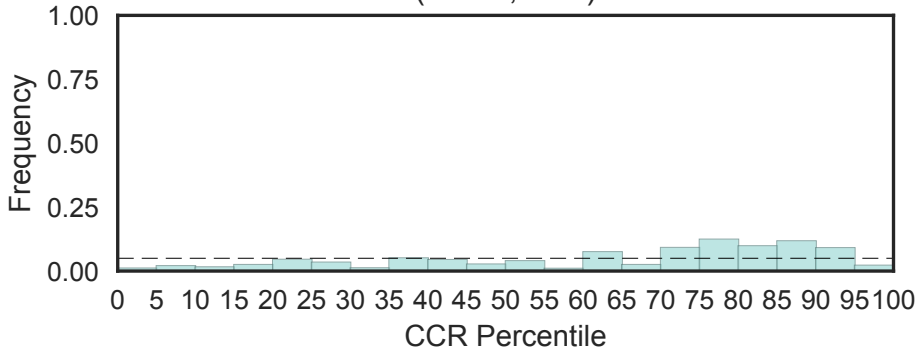

Palmitoyl protein thioesterase  
(Palm\_thioest, N=2)

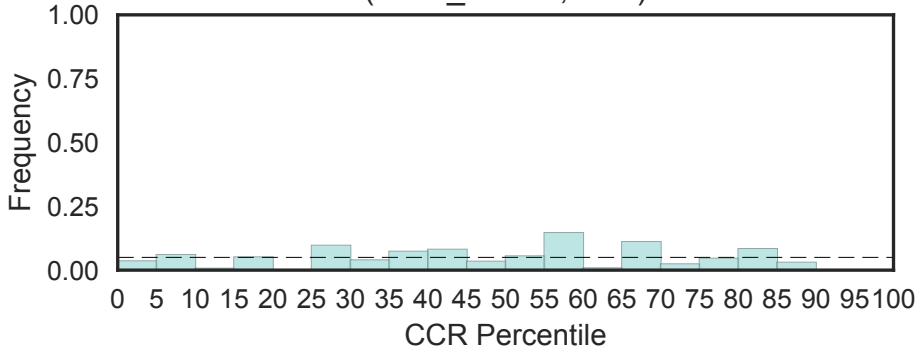

Pam16  
(Pam16, N=2)

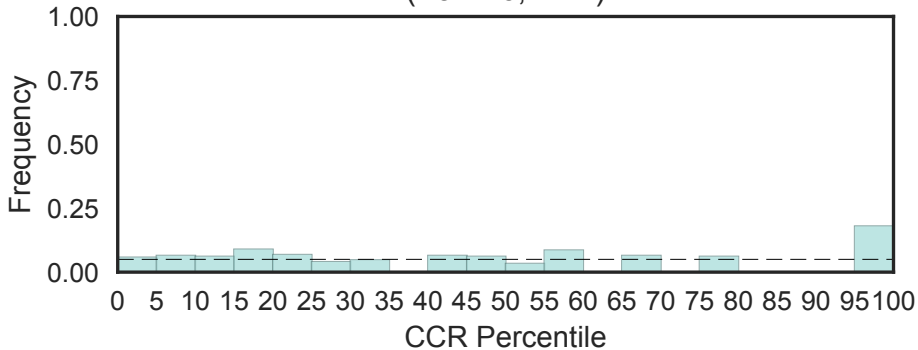

Pannexin-like TM region of LRRC8  
(Pannexin\_like, N=5)  
Fisher's OR: 1.74; Bonferroni p-val: 1

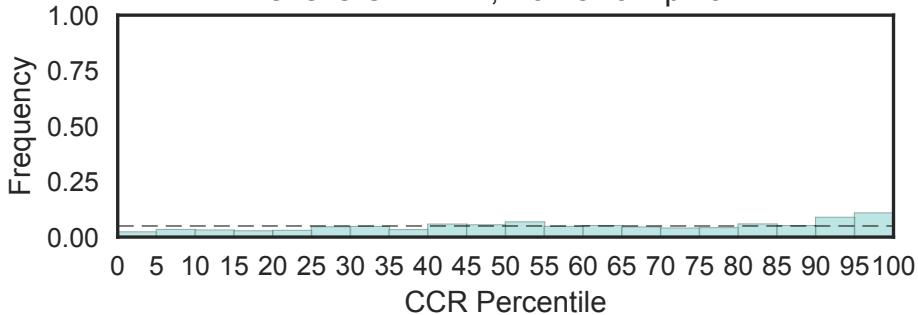

Flagellar-associated PapD-like  
(PapD-like, N=4)

Fisher's OR: 0; Bonferroni p-val: 1

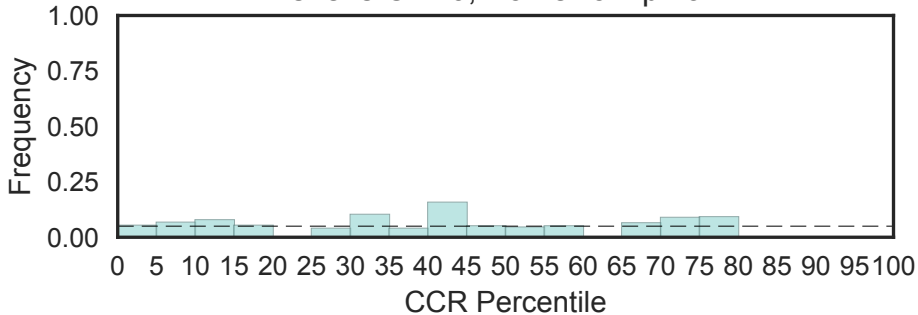

Linking region between Kunitz\_BPTI and I-set on papilin  
(Papilin\_u7, N=1)

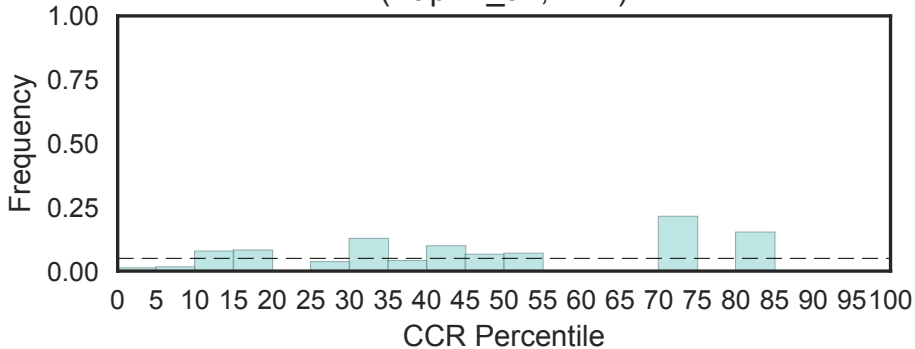

NUBPL iron-transfer P-loop NTPase  
(ParA, N=3)

Fisher's OR: 0; Bonferroni p-val: 1

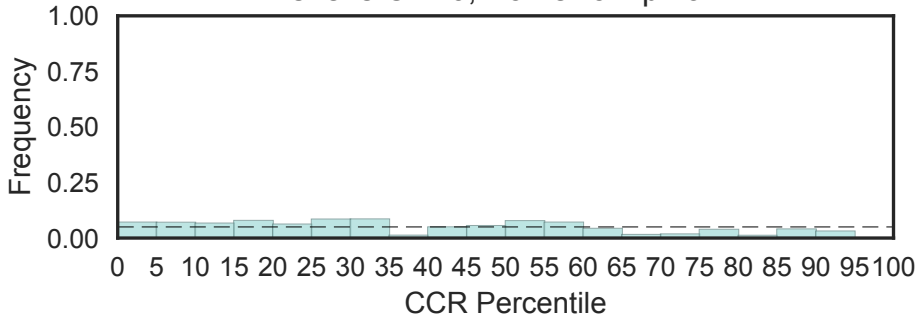

ParB-like nuclease domain  
(ParBc, N=2)

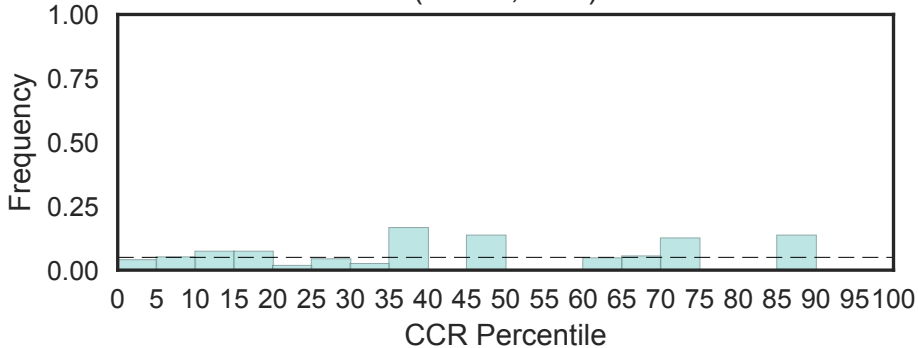



Paralemmin  
(Paralemmin, N=5)  
Fisher's OR: 0.361; Bonferroni p-val: 1

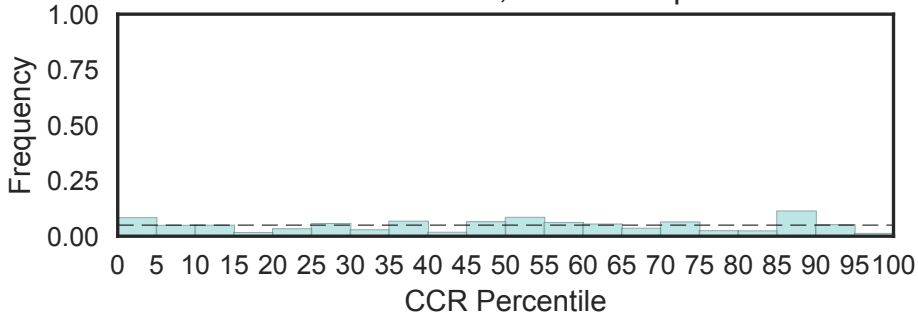

Parathyroid hormone family  
(Parathyroid, N=2)

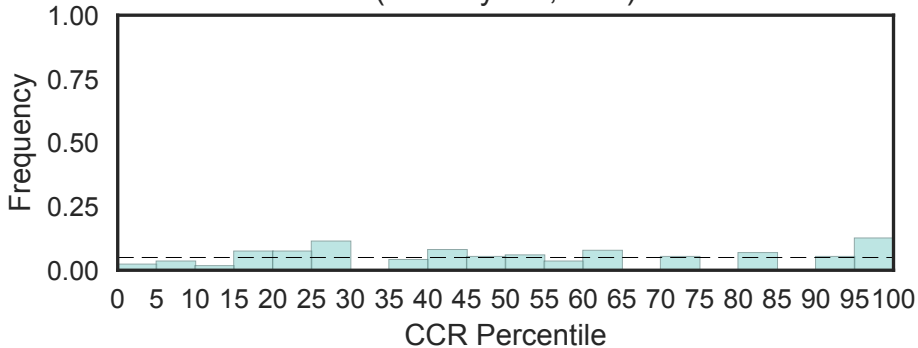

Parkin co-regulated protein  
(ParcG, N=4)

Fisher's OR: 0; Bonferroni p-val: 1

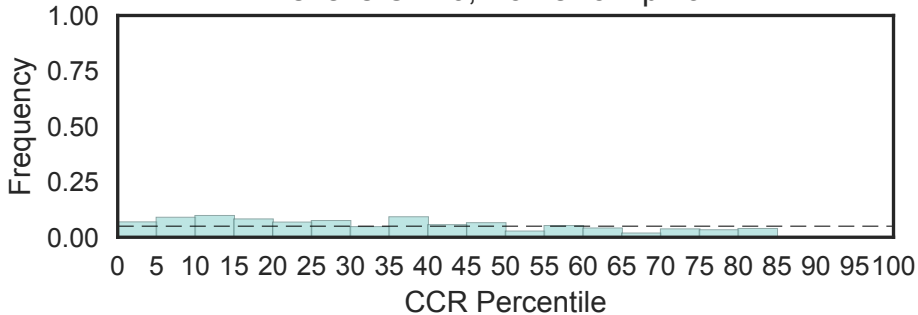

Patatin-like phospholipase  
(Patatin, N=8)

Fisher's OR: 0; Bonferroni p-val: 1

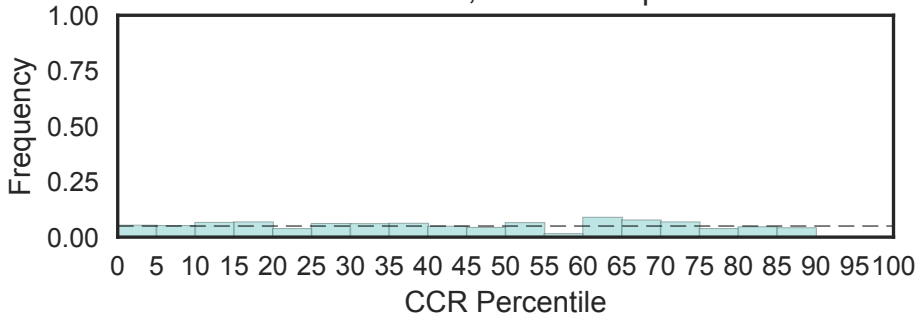

Patched family  
(Patched, N=16)

Fisher's OR: 0.241; Bonferroni p-val: 1

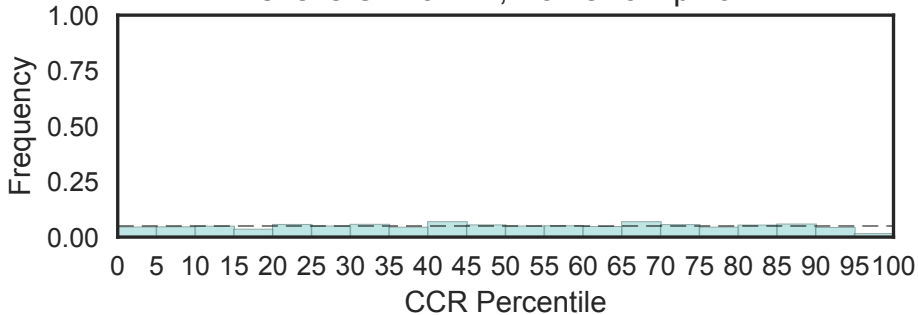

Paired-box protein 2 C terminal  
(Pax2\_C, N=3)

Fisher's OR: 0; Bonferroni p-val: 1

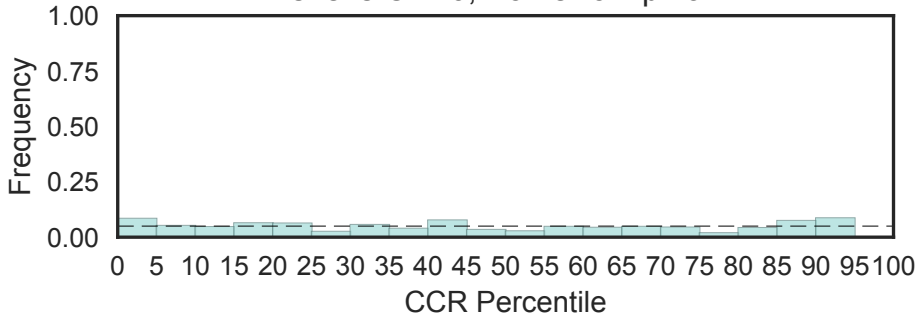

Paired box protein 7  
(Pax7, N=2)

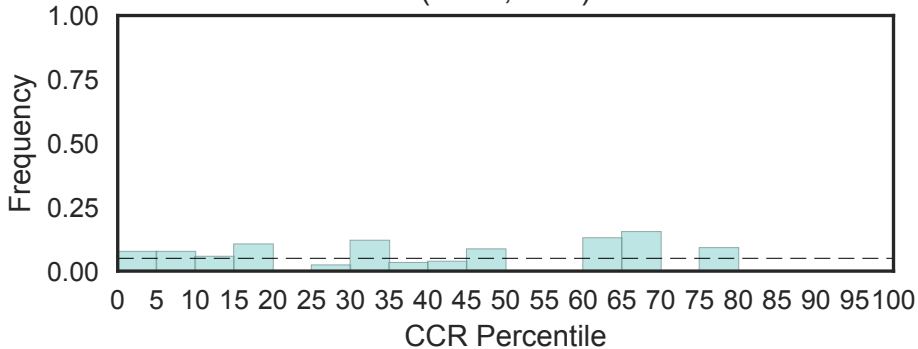

Paxillin family  
(Paxillin, N=2)

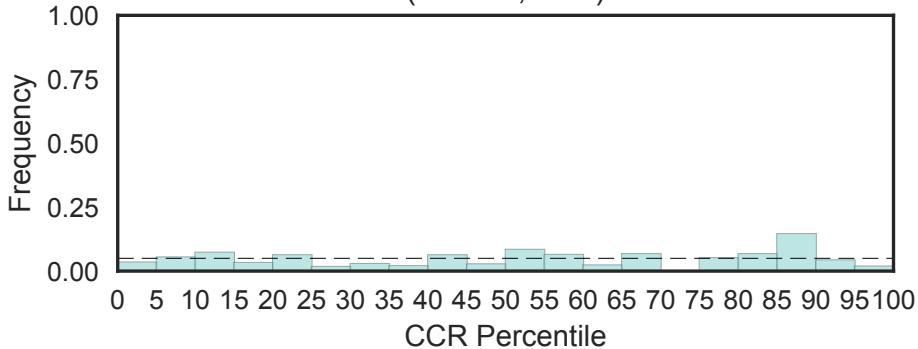



# Pecanex protein (C-terminus)

(Pecanex\_C, N=4)

Fisher's OR: 1.35; Bonferroni p-val: 1

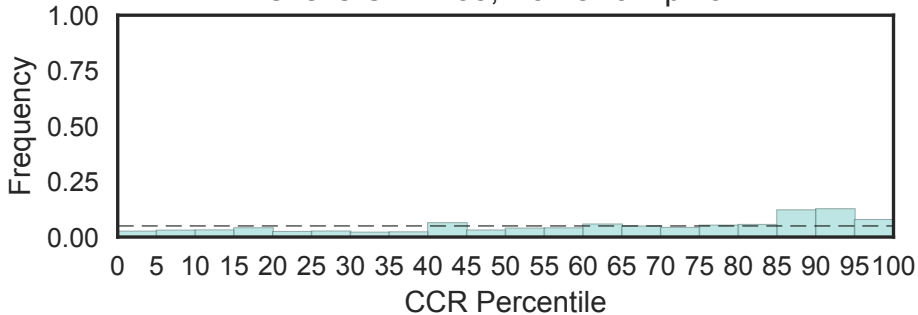

Pellino  
(Pellino, N=3)

Fisher's OR: 0.776; Bonferroni p-val: 1

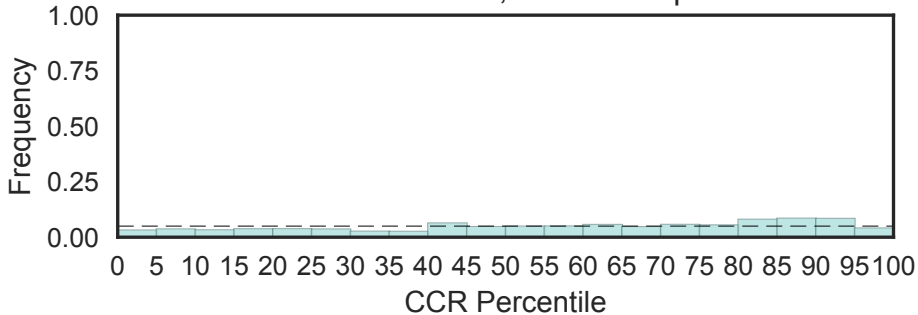

Penicillinase repressor  
(Penicillinase\_R, N=2)

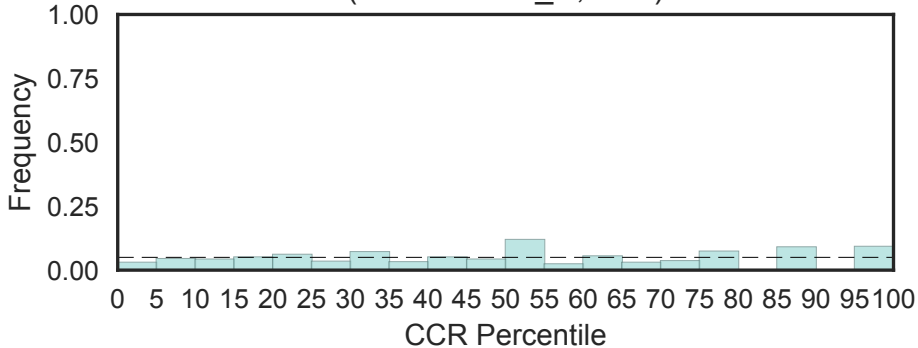

Pentapeptide repeats (8 copies)  
(Pentapeptide, N=3)  
Fisher's OR: 18; Bonferroni p-val: 1

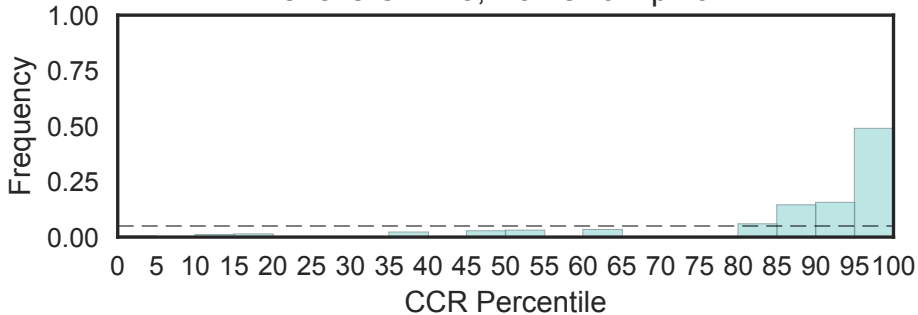

Pentapeptide repeats (9 copies)  
(Pentapeptide\_4, N=4)  
Fisher's OR: 1.33; Bonferroni p-val: 1

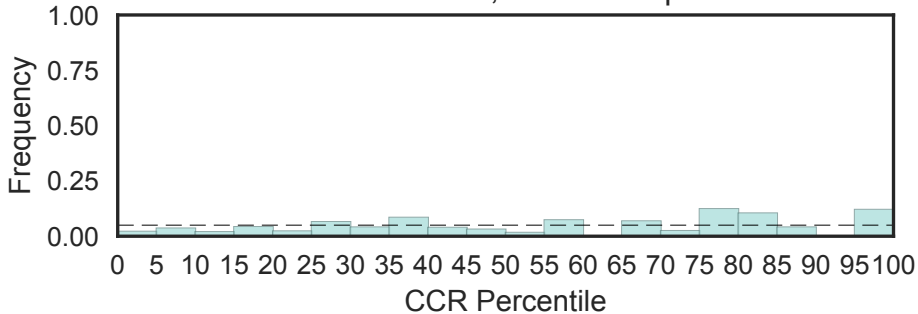

Pentaxin family  
(Pentaxin, N=10)

Fisher's OR: 0.476; Bonferroni p-val: 1

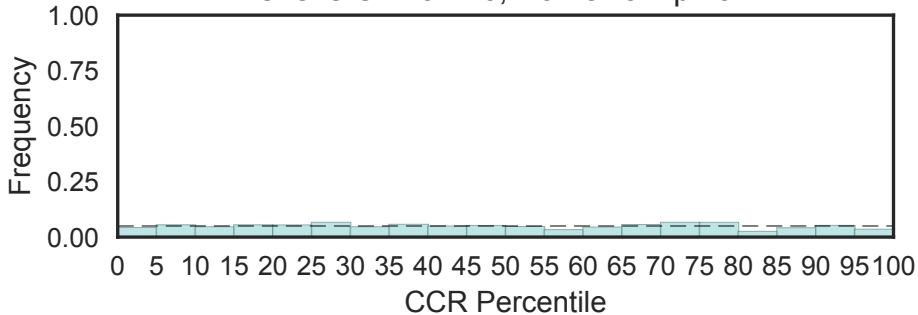

Pep3/Vps18/deep orange family  
(Pep3\_Vps18, N=1)

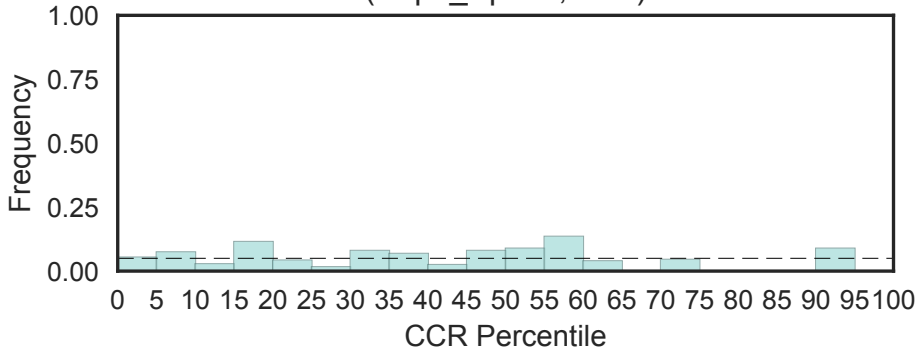

Reprolysin family propeptide  
(Pep\_M12B\_propep, N=39)

Fisher's OR: 0.184; Bonferroni p-val: 0.865

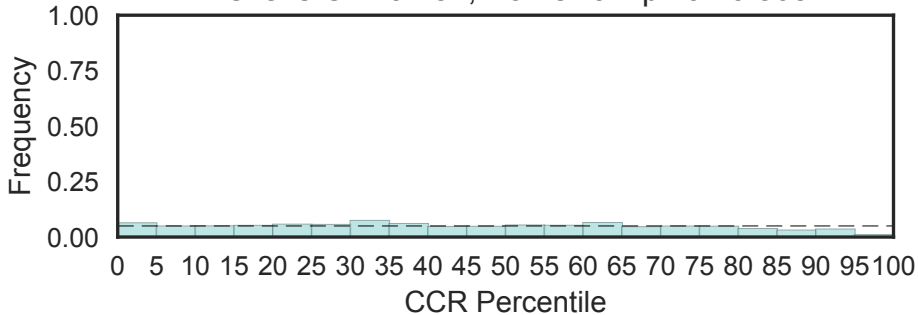



Polypeptide deformylase  
(Pep\_deformylase, N=2)

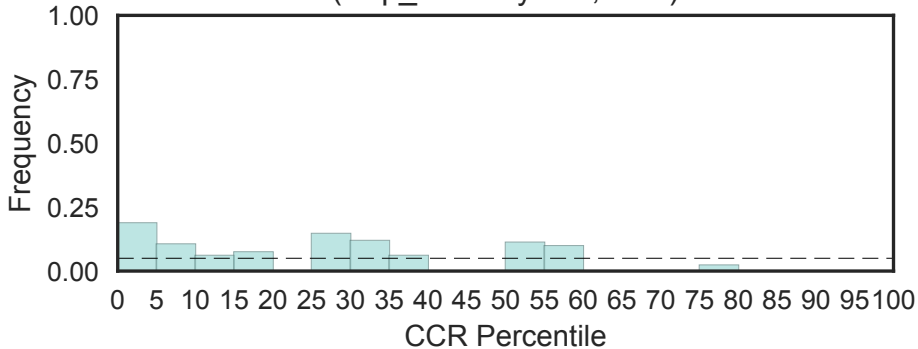

Peptidyl-tRNA hydrolase  
(Pept\_tRNA\_hydro, N=2)

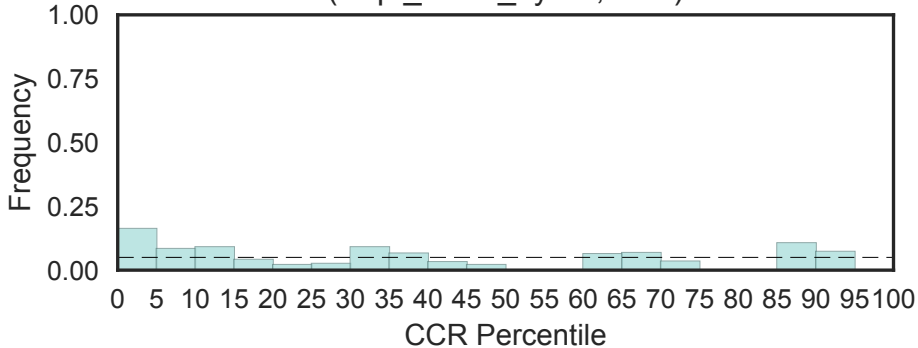

Signal peptide peptidase  
(Peptidase\_A22B, N=4)  
Fisher's OR: 3.49; Bonferroni p-val: 1

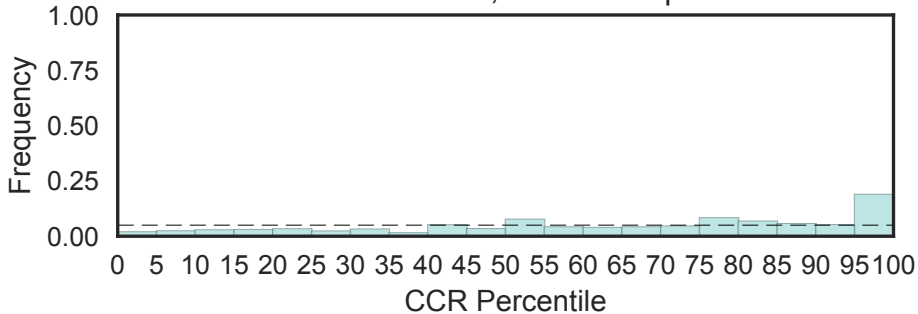

Papain family cysteine protease  
(Peptidase\_C1, N=13)

Fisher's OR: 0.0848; Bonferroni p-val: 1

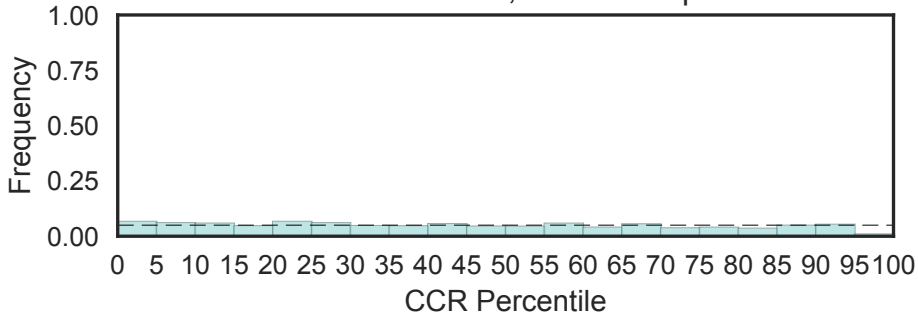

Peptidase family C101  
(Peptidase\_C101, N=2)

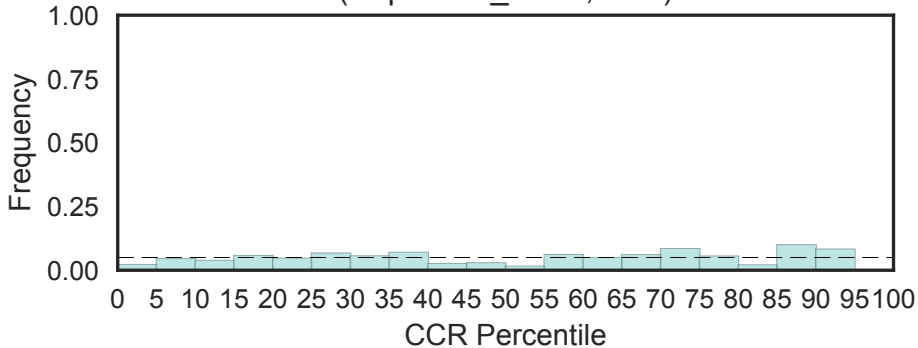

Ubiquitin carboxyl-terminal hydrolase, family 1  
(Peptidase\_C12, N=4)

Fisher's OR: 1.36; Bonferroni p-val: 1

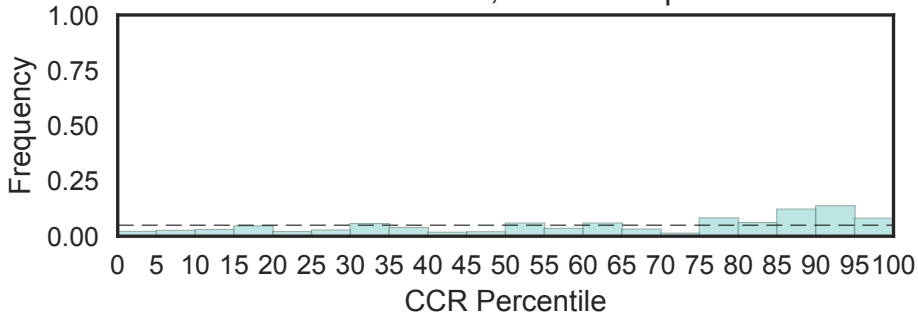

Peptidase C13 family  
(Peptidase\_C13, N=2)

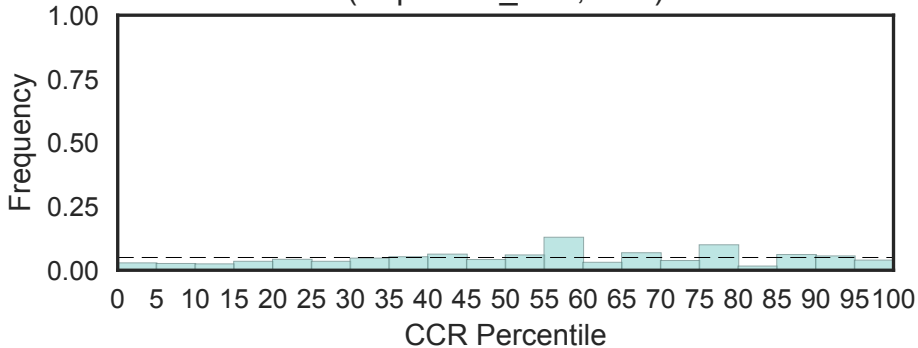

Caspase domain  
(Peptidase\_C14, N=15)

Fisher's OR: 0.561; Bonferroni p-val: 1

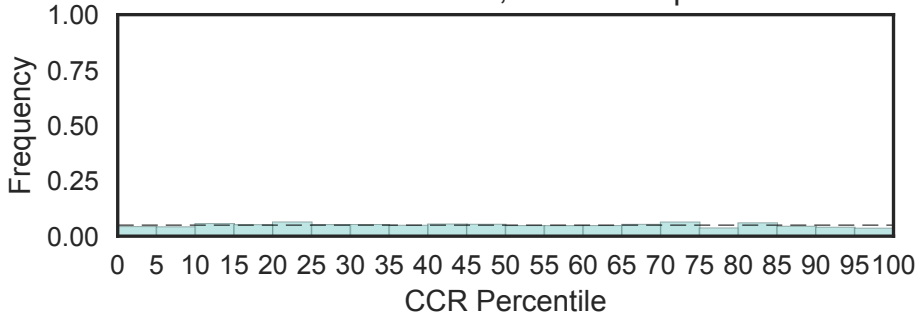



Pyroglutamyl peptidase  
(Peptidase\_C15, N=2)

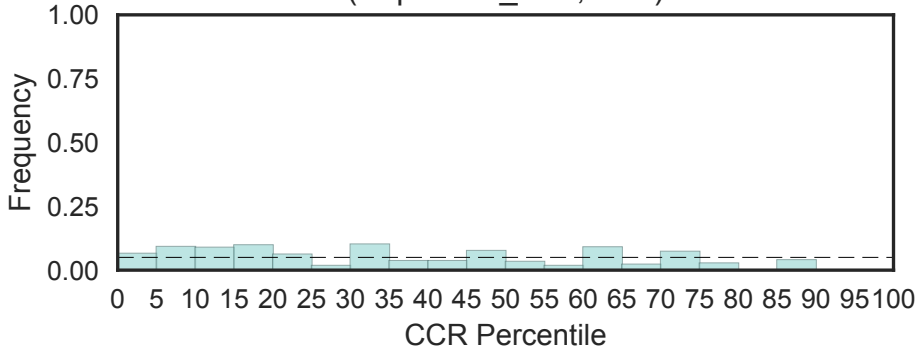

Peptidase C1-like family  
(Peptidase\_C1\_2, N=3)

Fisher's OR: 0.578; Bonferroni p-val: 1

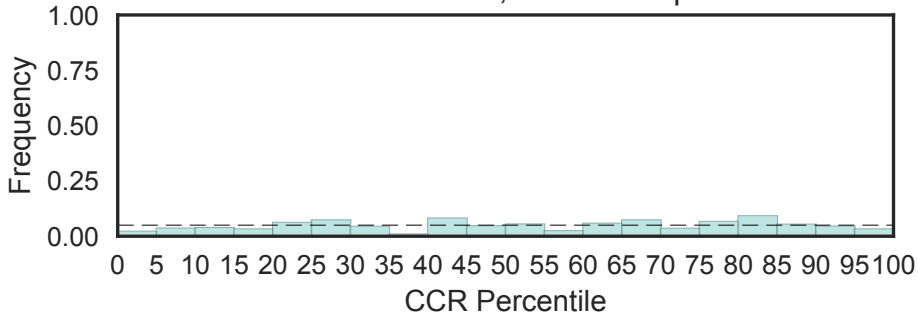

Calpain family cysteine protease  
(Peptidase\_C2, N=15)  
Fisher's OR: 0.358; Bonferroni p-val: 1

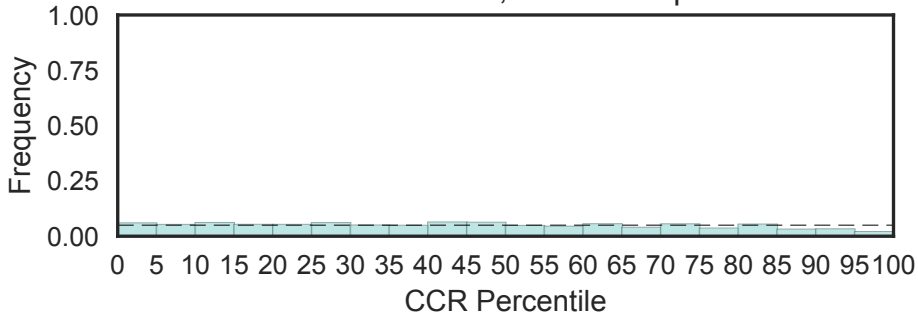

Peptidase C26  
(Peptidase\_C26, N=3)  
Fisher's OR: 0; Bonferroni p-val: 1

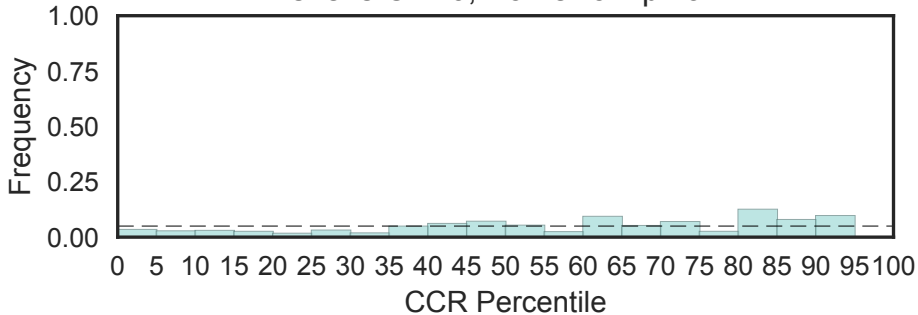

Peptidase\_C39 like family  
(Peptidase\_C39\_2, N=1)

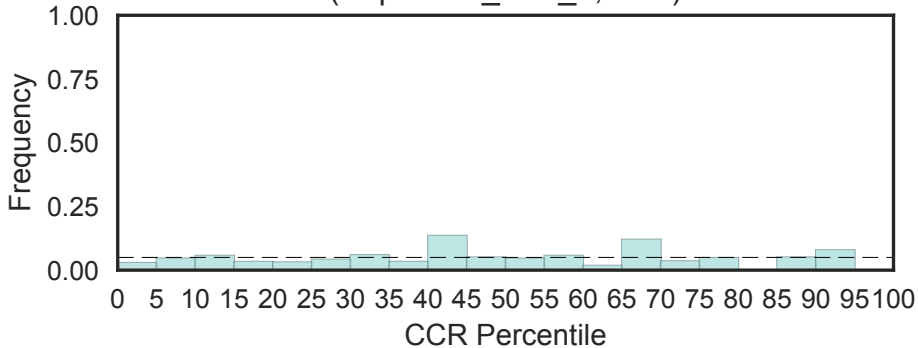

Ulp1 protease family, C-terminal catalytic domain  
(Peptidase\_C48, N=8)

Fisher's OR: 6.97; Bonferroni p-val: 1.01e-05

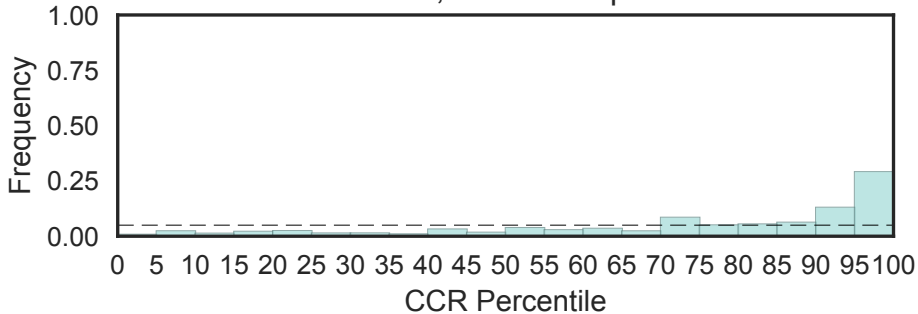

Peptidase family C50  
(Peptidase\_C50, N=2)

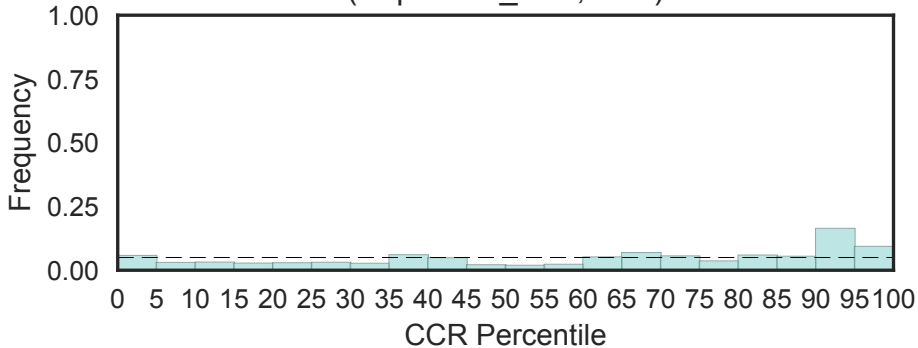

# Peptidase family C54

(Peptidase\_C54, N=3)

Fisher's OR: 1.14; Bonferroni p-val: 1

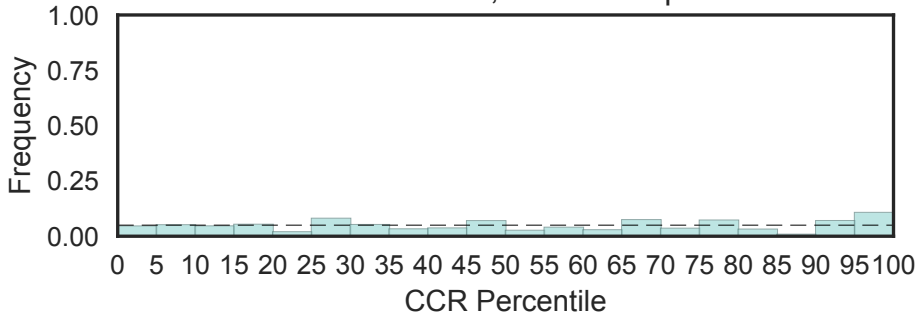



Peptidase C65 Otubain  
(Peptidase\_C65, N=3)

Fisher's OR: 1.83; Bonferroni p-val: 1

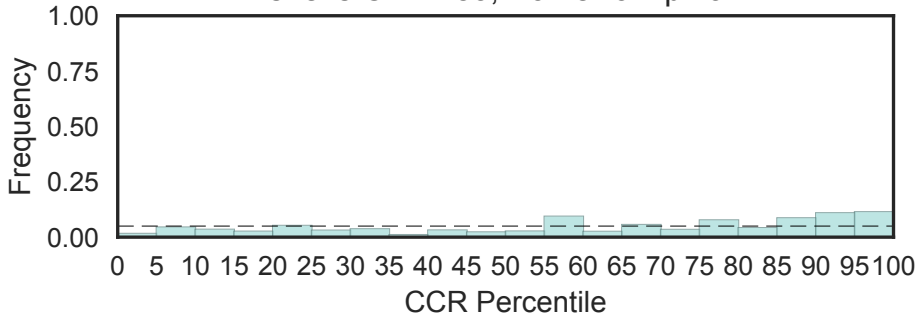

# Peptidase family C69

(Peptidase\_C69, N=3)

Fisher's OR: 0.56; Bonferroni p-val: 1

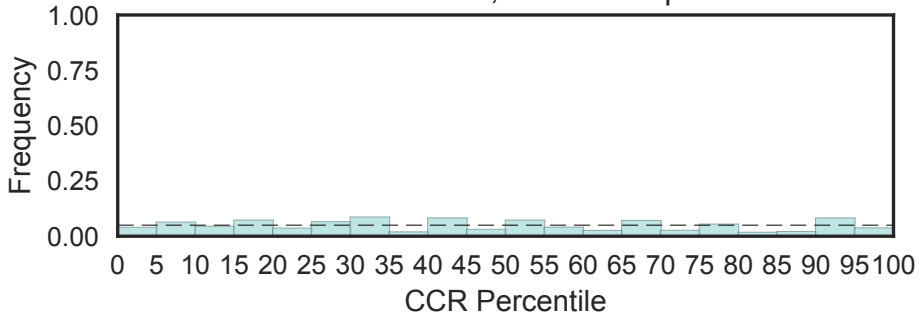

Papain-like cysteine protease AvrRpt2  
(Peptidase\_C70, N=1)

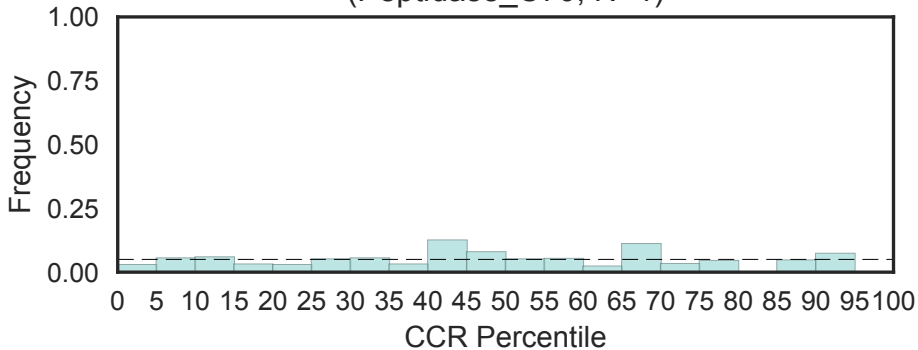

# Peptidase family C78

(Peptidase\_C78, N=3)

Fisher's OR: 0; Bonferroni p-val: 1

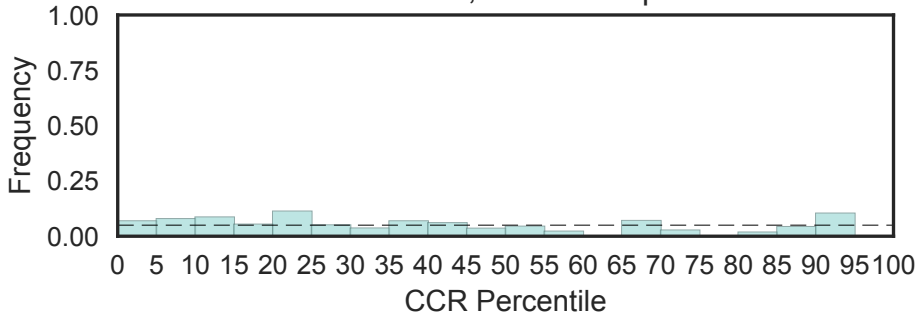

PPPDE putative peptidase domain  
(Peptidase\_C97, N=2)

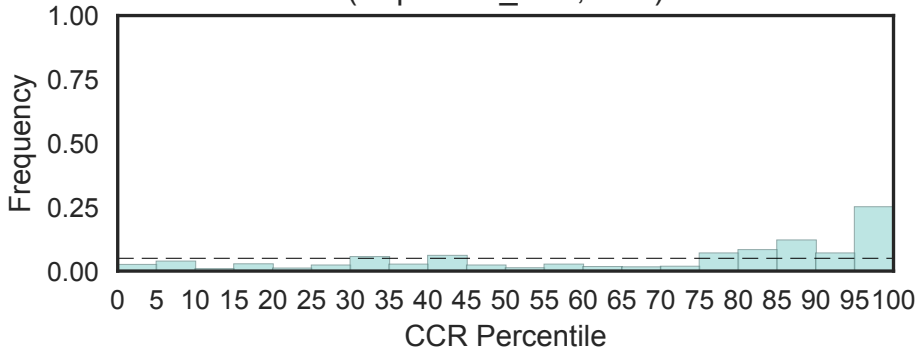

Ubiquitin-specific peptidase-like, SUMO isopeptidase  
(Peptidase\_C98, N=1)

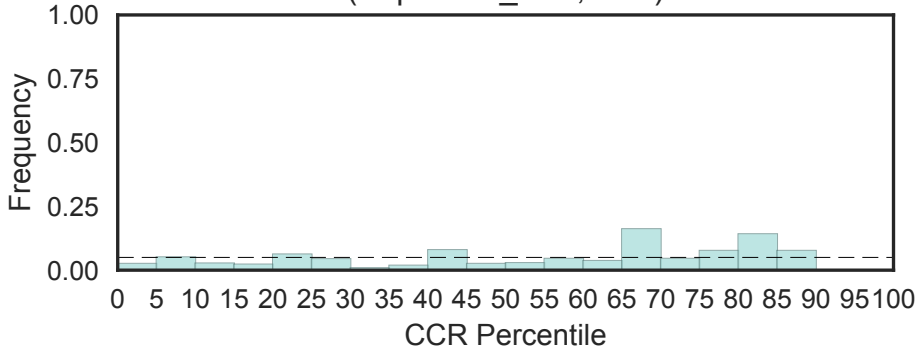

Peptidase family M1 domain  
(Peptidase\_M1, N=13)

Fisher's OR: 0.747; Bonferroni p-val: 1

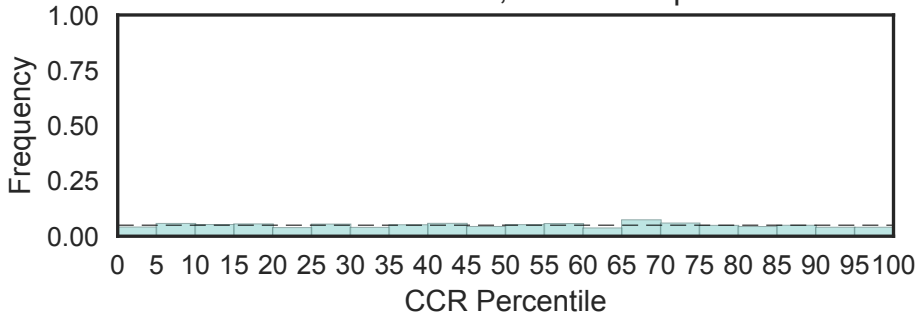

Matrixin  
(Peptidase\_M10, N=21)  
Fisher's OR: 0.421; Bonferroni p-val: 1

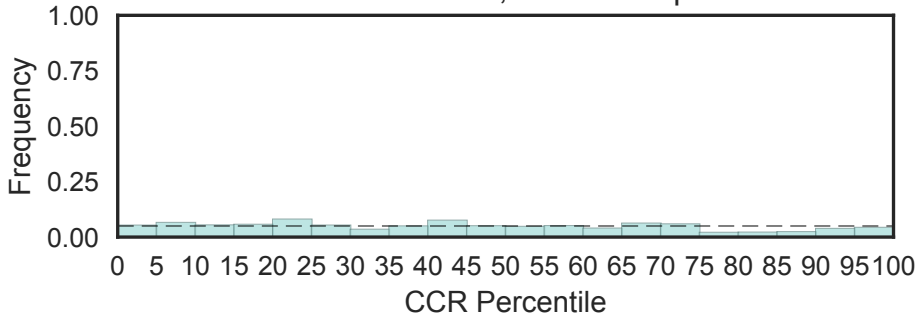



# Peptidase family M13

(Peptidase\_M13, N=6)

Fisher's OR: 0.205; Bonferroni p-val: 1

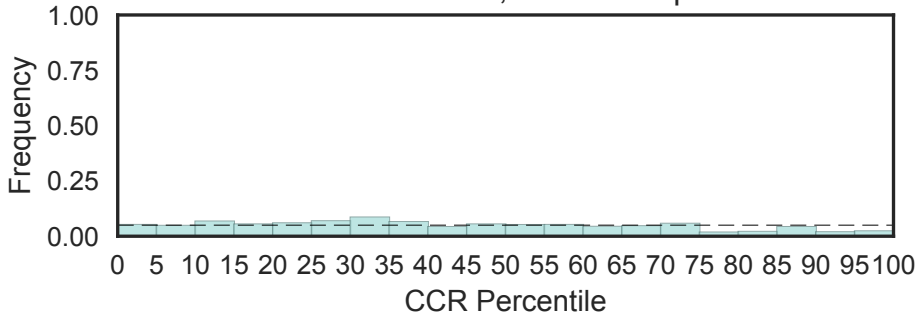

Peptidase family M13  
(Peptidase\_M13\_N, N=6)  
Fisher's OR: 0; Bonferroni p-val: 1

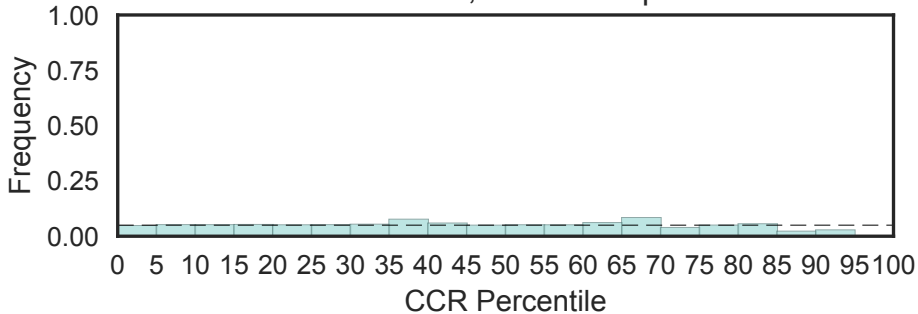

Zinc carboxypeptidase  
(Peptidase\_M14, N=26)

Fisher's OR: 0.362; Bonferroni p-val: 1

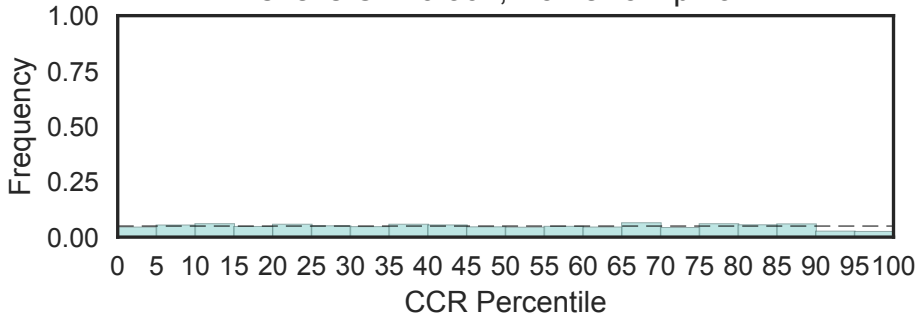

Insulinase (Peptidase family M16)  
(Peptidase\_M16, N=7)  
Fisher's OR: 0.588; Bonferroni p-val: 1

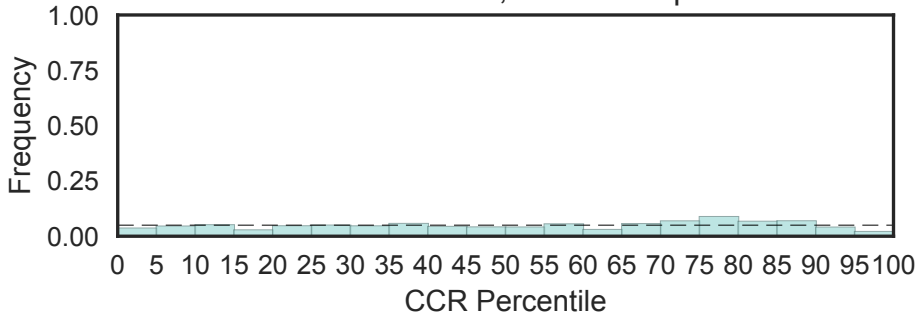

Peptidase M16 inactive domain  
(Peptidase\_M16\_C, N=10)  
Fisher's OR: 0.61; Bonferroni p-val: 1

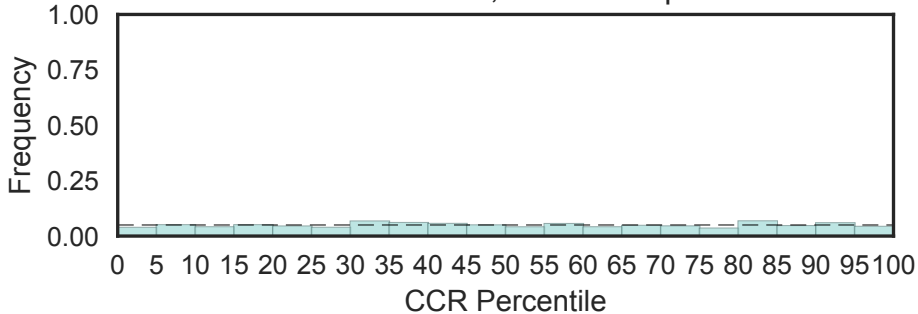

Middle or third domain of peptidase\_M16  
(Peptidase\_M16\_M, N=2)

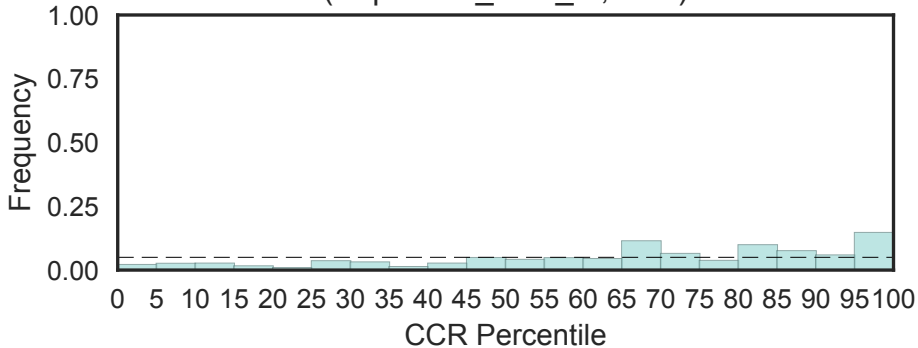

Cytosol aminopeptidase family, catalytic domain  
(Peptidase\_M17, N=2)

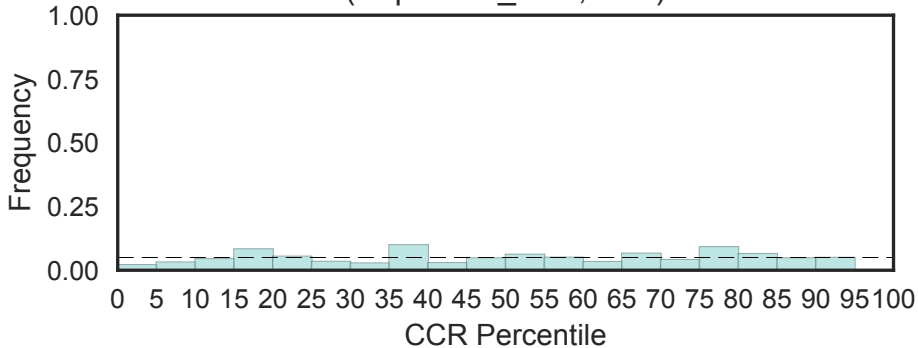

Cytosol aminopeptidase family, N-terminal domain  
(Peptidase\_M17\_N, N=1)

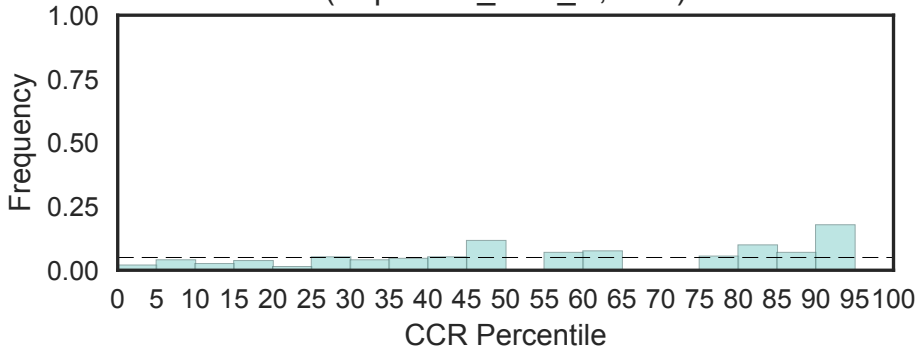



Aminopeptidase I zinc metalloprotease (M18)  
(Peptidase\_M18, N=1)

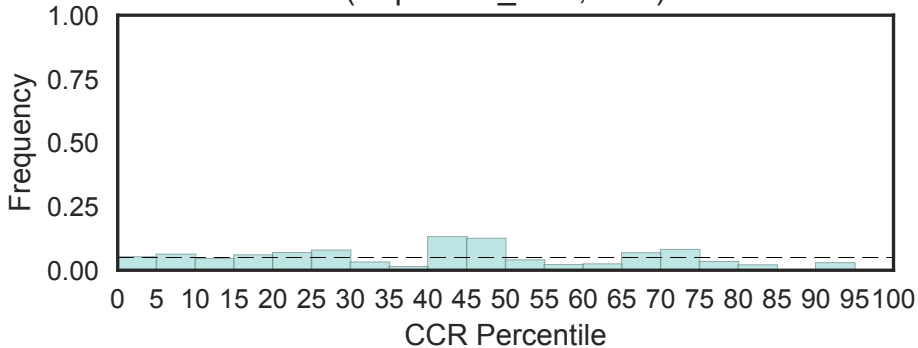

Membrane dipeptidase (Peptidase family M19)  
(Peptidase\_M19, N=3)

Fisher's OR: 0; Bonferroni p-val: 1

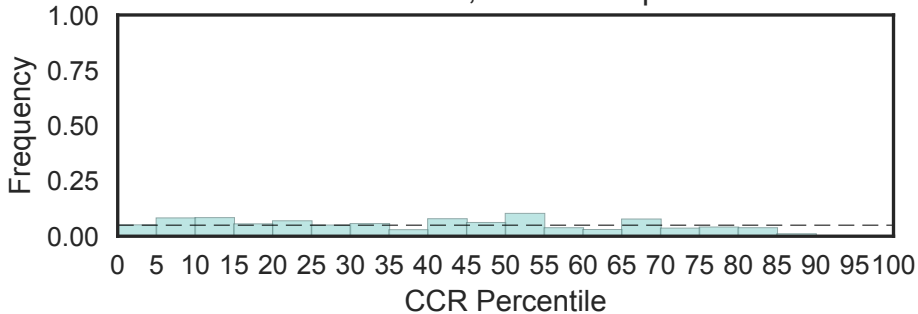

# Angiotensin-converting enzyme (Peptidase\_M2, N=2)

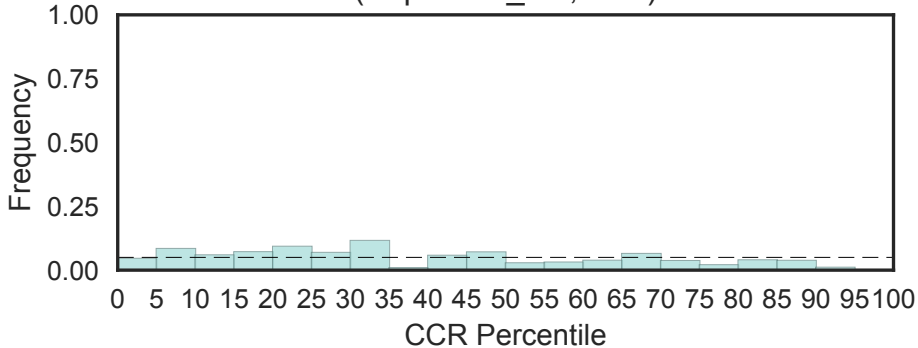

Peptidase family M20/M25/M40  
(Peptidase\_M20, N=7)

Fisher's OR: 0; Bonferroni p-val: 1

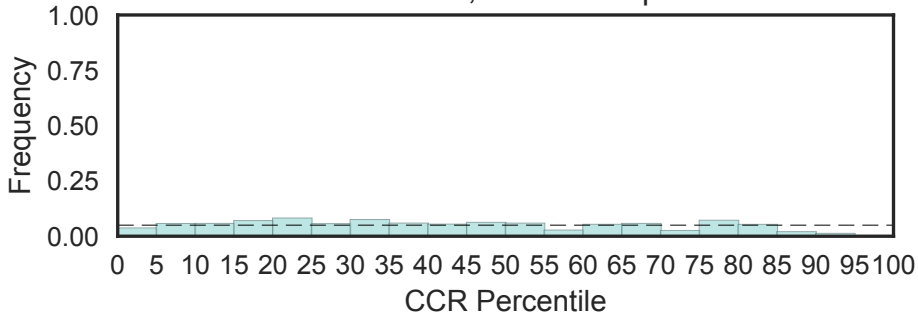

Glycoprotease family  
(Peptidase\_M22, N=2)

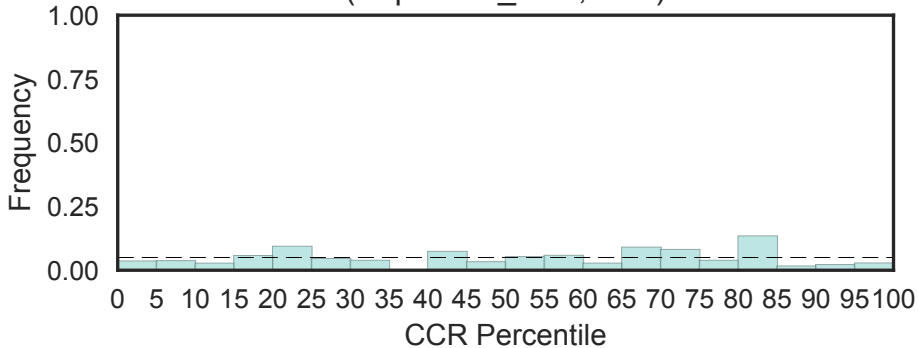

Peptidase family M23  
(Peptidase\_M23, N=1)

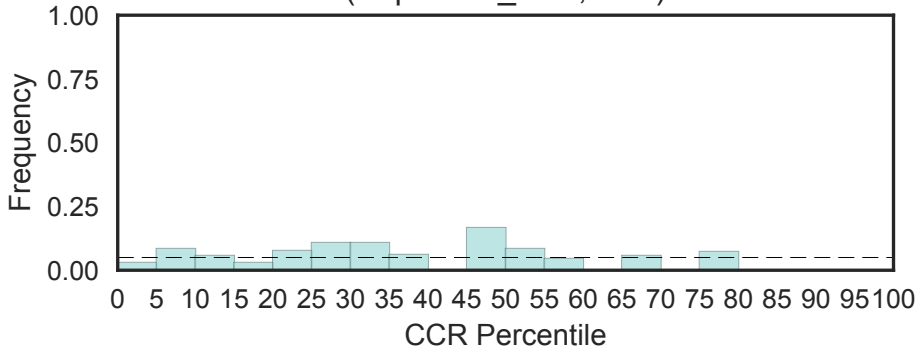

Metallopeptidase family M24  
(Peptidase\_M24, N=9)  
Fisher's OR: 2.26; Bonferroni p-val: 1

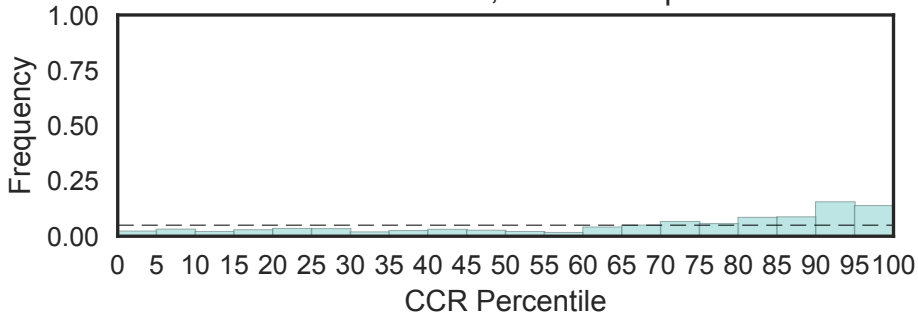

C-terminal region of peptidase\_M24  
(Peptidase\_M24\_C, N=1)

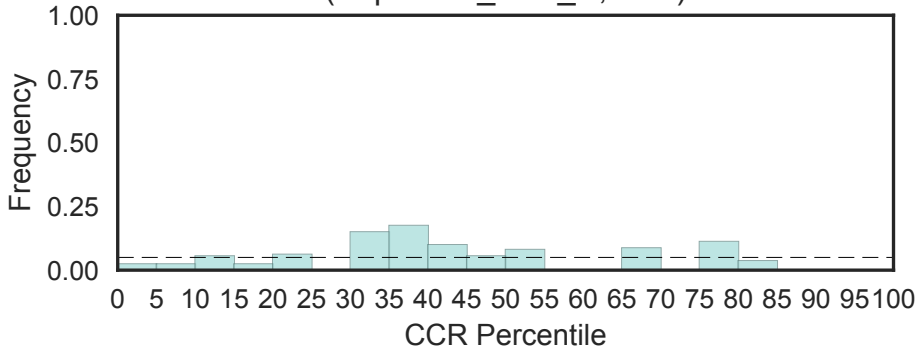



Peptidase family M28  
(Peptidase\_M28, N=14)  
Fisher's OR: 0.312; Bonferroni p-val: 1

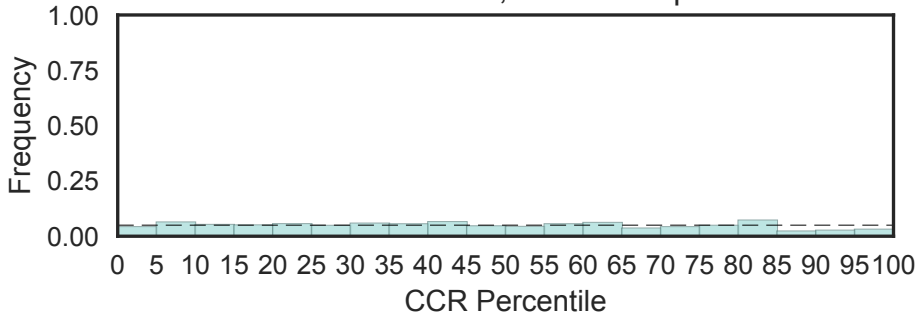

Peptidase family M3  
(Peptidase\_M3, N=4)

Fisher's OR: 0.193; Bonferroni p-val: 1

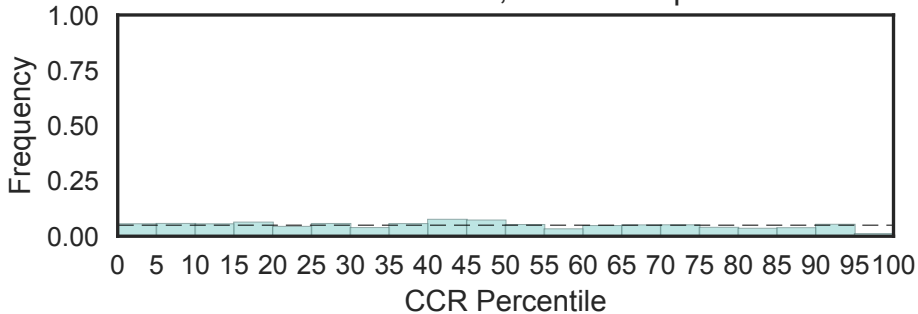

# Peptidase family M41

(Peptidase\_M41, N=4)

Fisher's OR: 0.92; Bonferroni p-val: 1

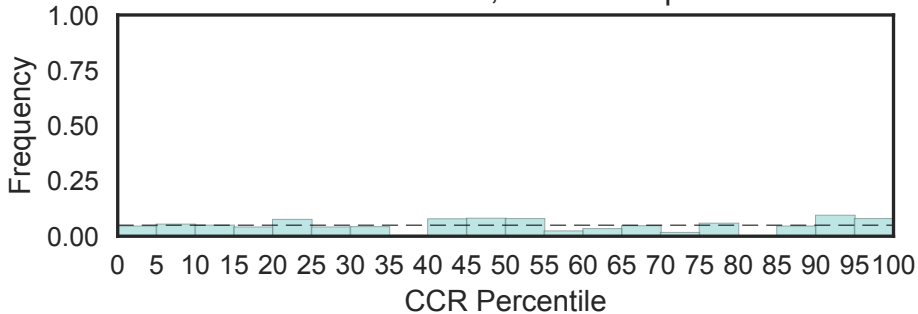

M42 glutamyl aminopeptidase  
(Peptidase\_M42, N=1)

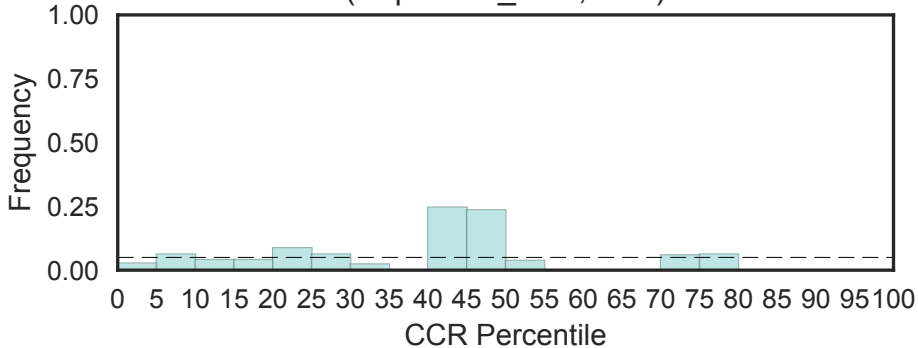

Pregnancy-associated plasma protein-A  
(Peptidase\_M43, N=2)

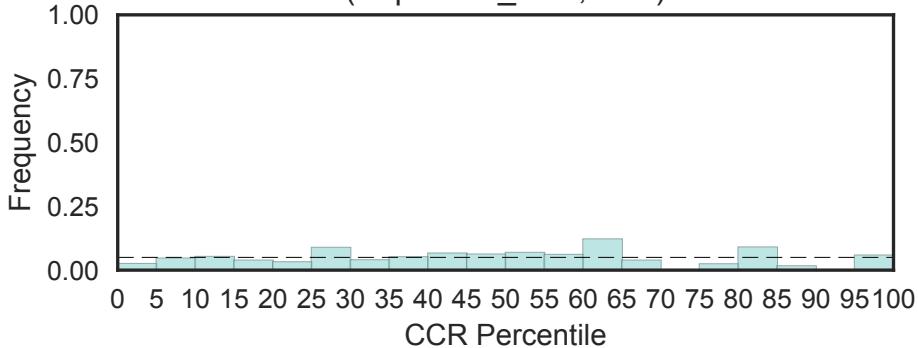

Peptidase family M48  
(Peptidase\_M48, N=2)

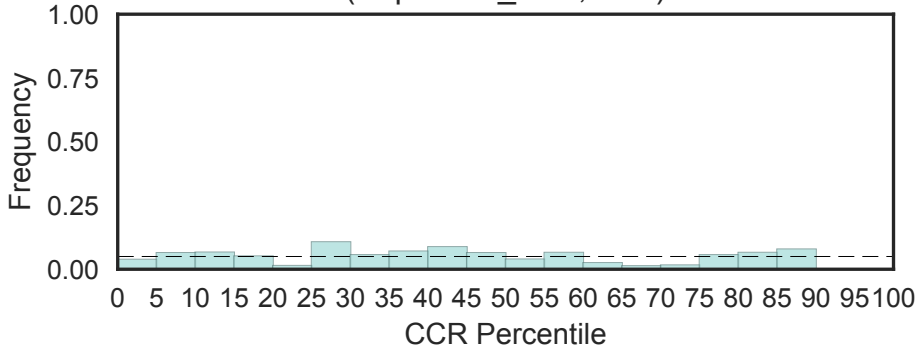

CAAX prenyl protease N-terminal, five membrane helices  
(Peptidase\_M48\_N, N=1)

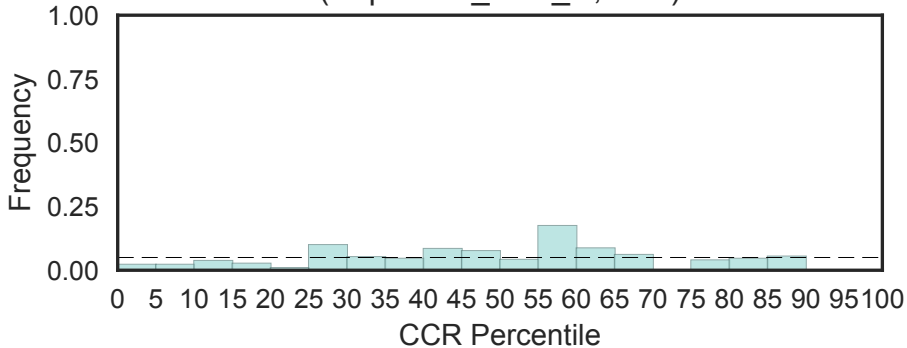

Peptidase family M49  
(Peptidase\_M49, N=1)

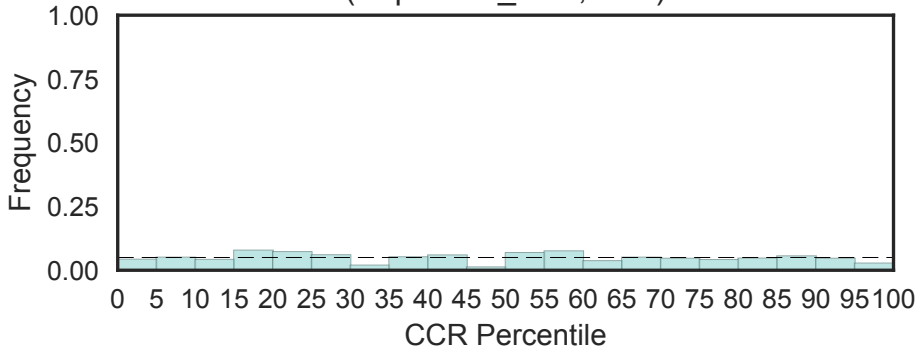



Peptidase M76 family  
(Peptidase\_M76, N=1)

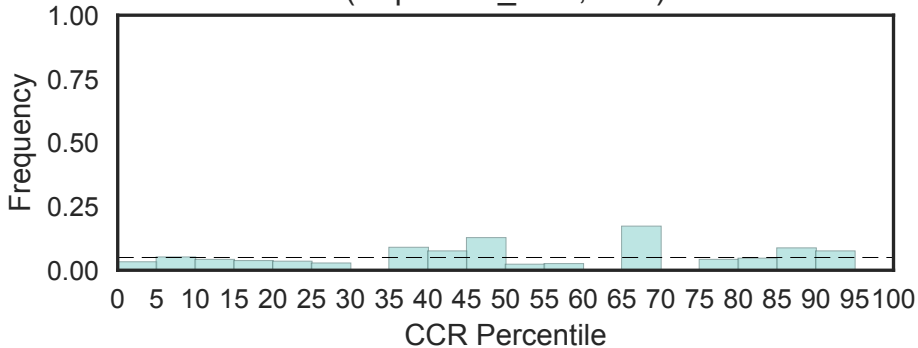

# Leishmanolysin (Peptidase\_M8, N=2)

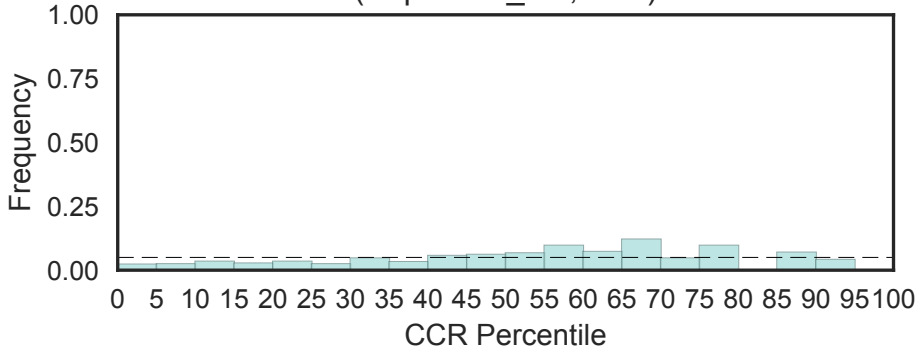

Serine carboxypeptidase  
(Peptidase\_S10, N=3)

Fisher's OR: 0.412; Bonferroni p-val: 1

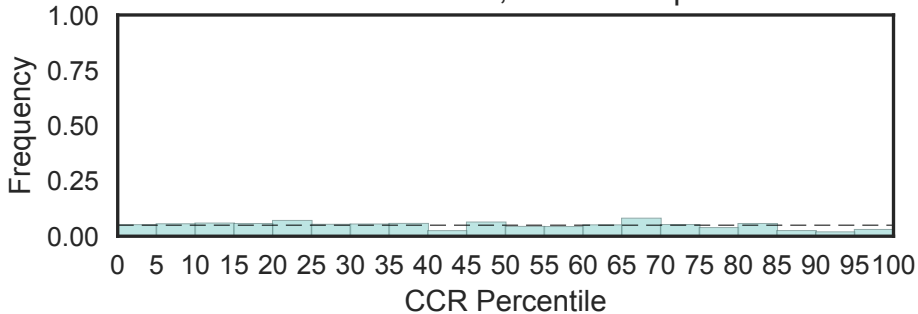

# X-Pro dipeptidyl-peptidase (S15 family)

(Peptidase\_S15, N=3)

Fisher's OR: 2.1; Bonferroni p-val: 1

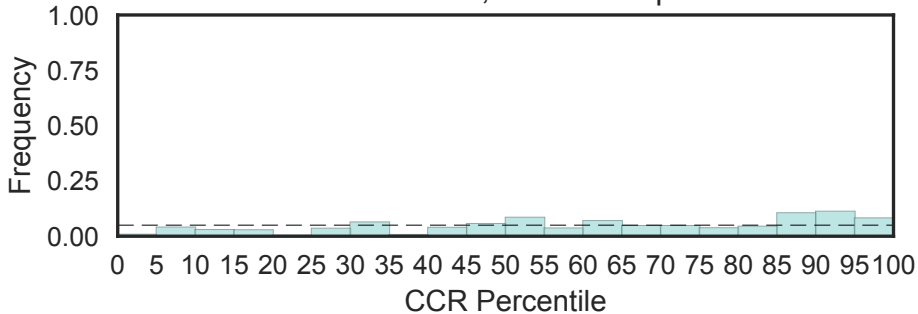

Peptidase S24-like  
(Peptidase\_S24, N=5)

Fisher's OR: 0.308; Bonferroni p-val: 1

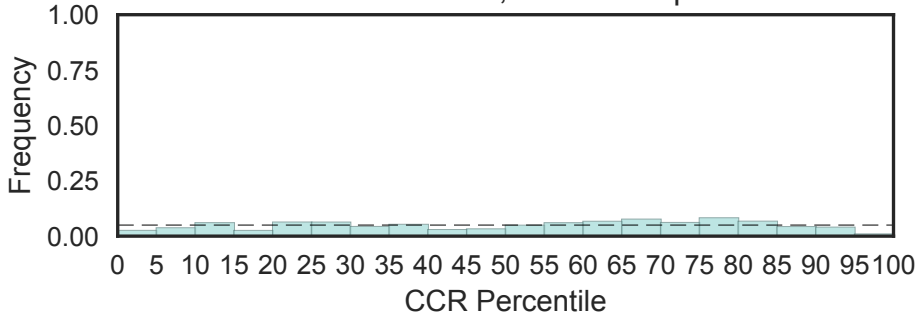

# Serine carboxypeptidase S28

(Peptidase\_S28, N=3)

Fisher's OR: 0.199; Bonferroni p-val: 1

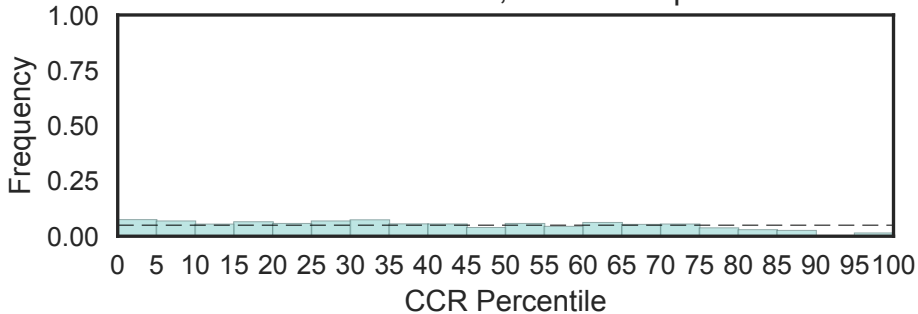

PS-10 peptidase S37  
(Peptidase\_S37, N=1)

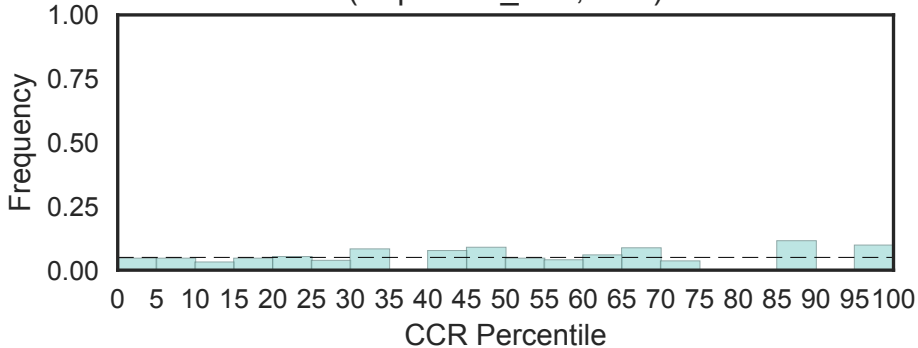

# Peptidase family S41

(Peptidase\_S41, N=4)

Fisher's OR: 0; Bonferroni p-val: 1

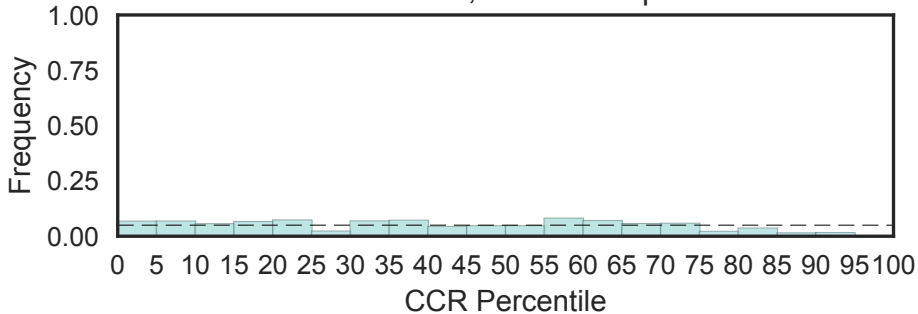



N-terminal domain of Peptidase\_S41 in eukaryotic IRBP  
(Peptidase\_S41\_N, N=4)

Fisher's OR: 0; Bonferroni p-val: 1

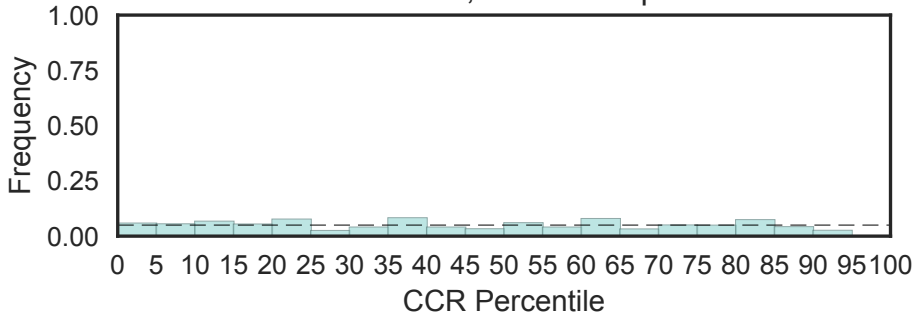

Peptidase S68  
(Peptidase\_S68, N=1)

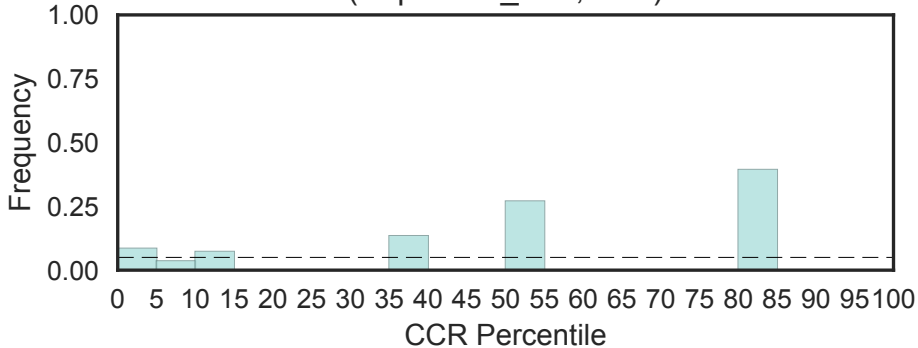

Chaperone of endosialidase  
(Peptidase\_S74, N=1)

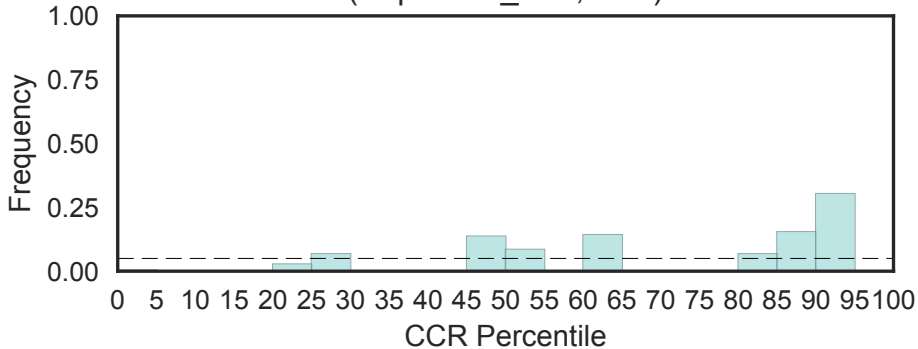

Subtilase family  
(Peptidase\_S8, N=10)  
Fisher's OR: 2.85; Bonferroni p-val: 0.14

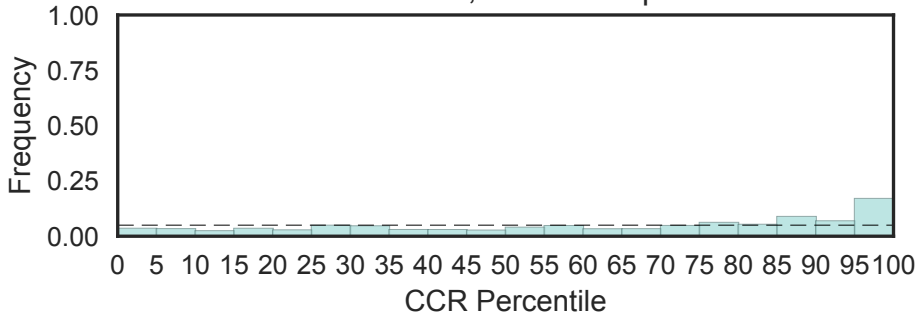

# Prolyl oligopeptidase family

(Peptidase\_S9, N=15)

Fisher's OR: 1.74; Bonferroni p-val: 1

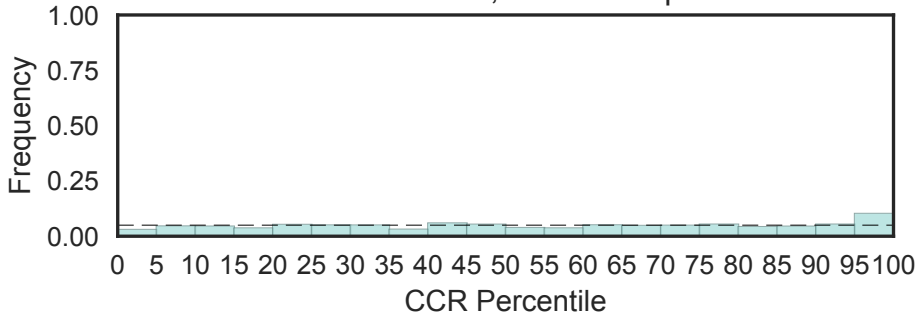

Prolyl oligopeptidase, N-terminal beta-propeller domain  
(Peptidase\_S9\_N, N=2)

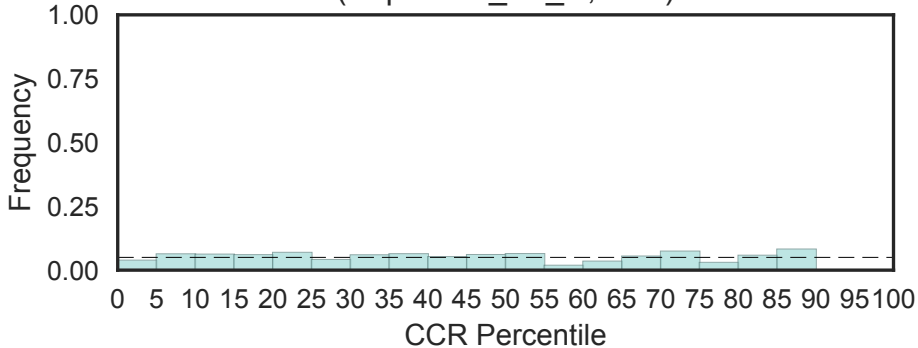

Per1-like family  
(Per1, N=1)

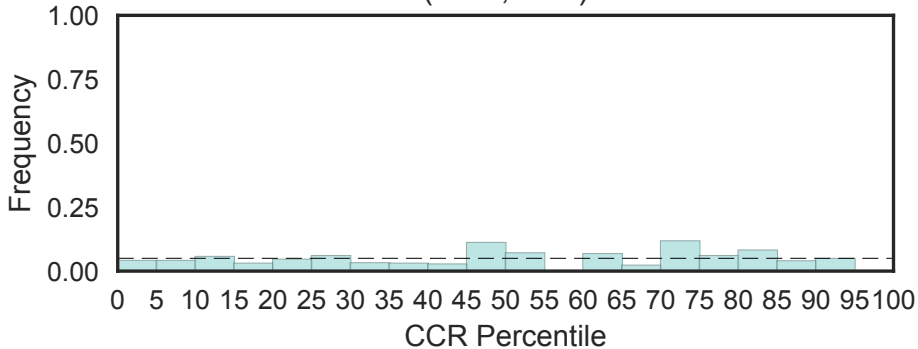

Perilipin family  
(Perilipin, N=5)

Fisher's OR: 0; Bonferroni p-val: 1

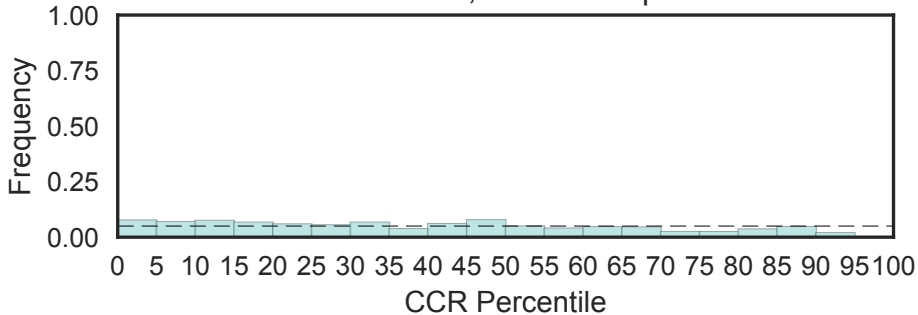



Period protein 2/3C-terminal region  
(Period\_C, N=3)

Fisher's OR: 0; Bonferroni p-val: 1

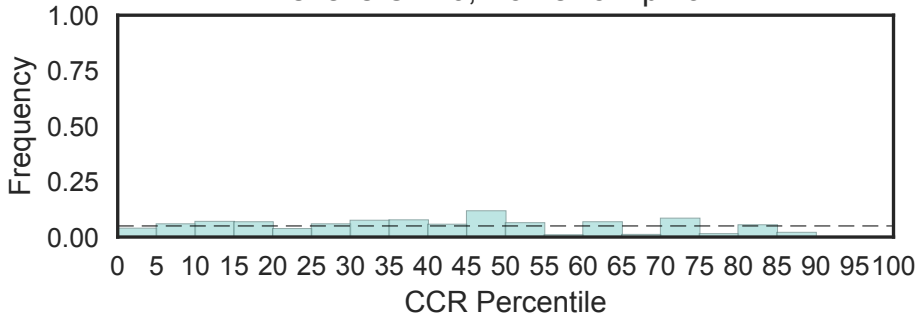

Periplasmic binding protein  
(Peripla\_BP\_6, N=12)

Fisher's OR: 0.86; Bonferroni p-val: 1

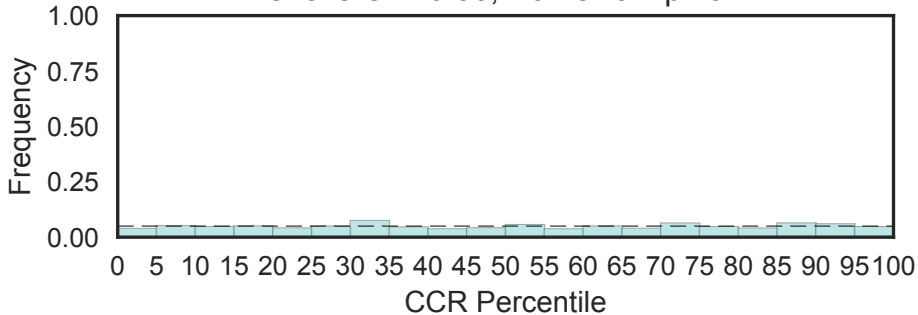

Peroxin 13, N-terminal region  
(Peroxin-13\_N, N=1)

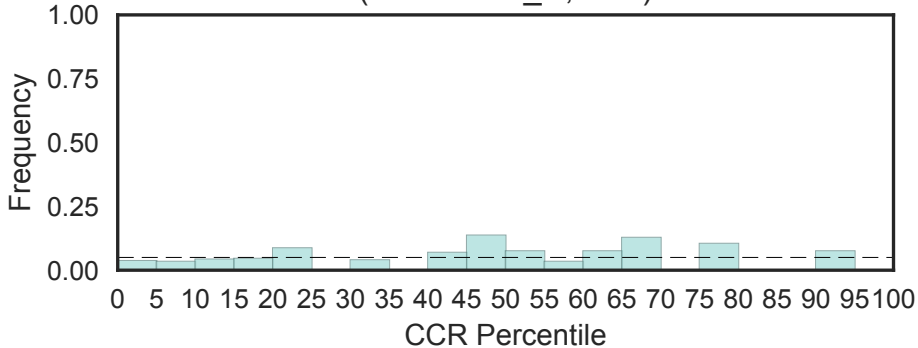

# Peroxin-3 (Peroxin-3, N=1)

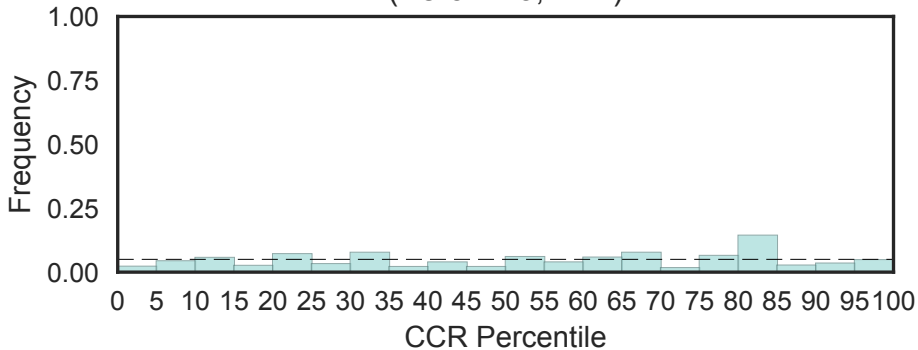

Pescadillo N-terminus  
(Pescadillo\_N, N=1)

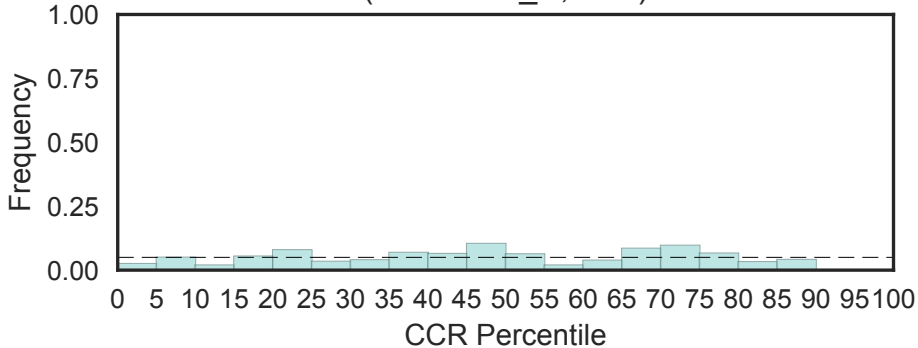

Pet100  
(Pet100, N=1)

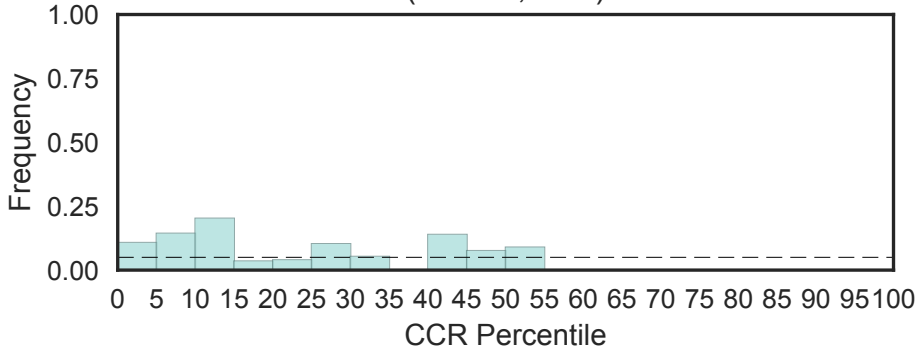

Cytochrome c oxidase assembly protein PET191  
(Pet191\_N, N=1)

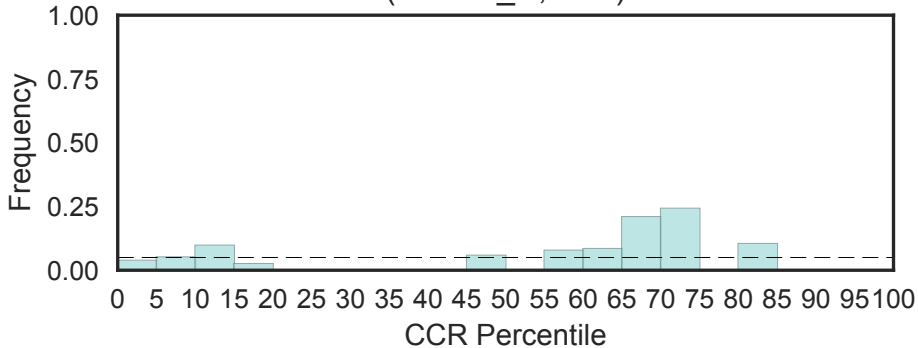

# Peroxisomal membrane anchor protein (Pex14p) conserved region (Pex14\_N, N=1)

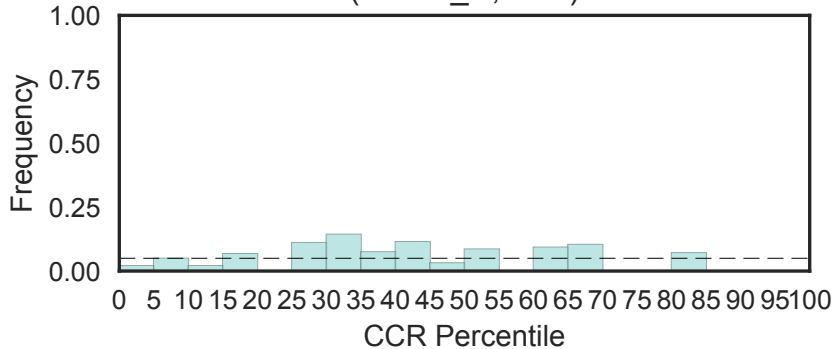



Peroxisomal membrane protein (Pex16)  
(Pex16, N=1)

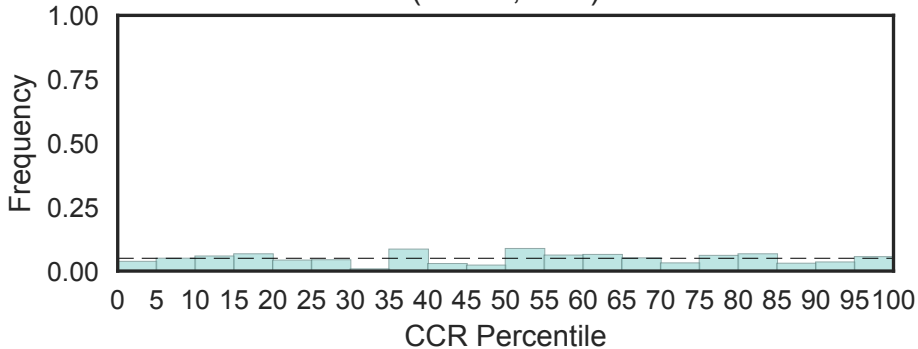

Pex19 protein family  
(Pex19, N=2)

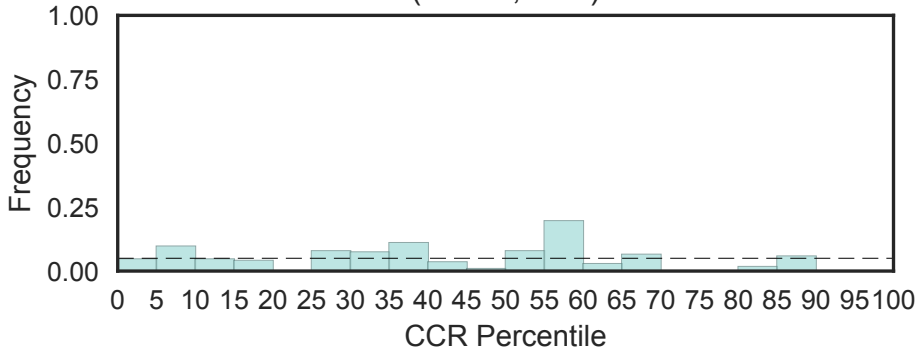

Integral peroxisomal membrane peroxin  
(Pex24p, N=2)

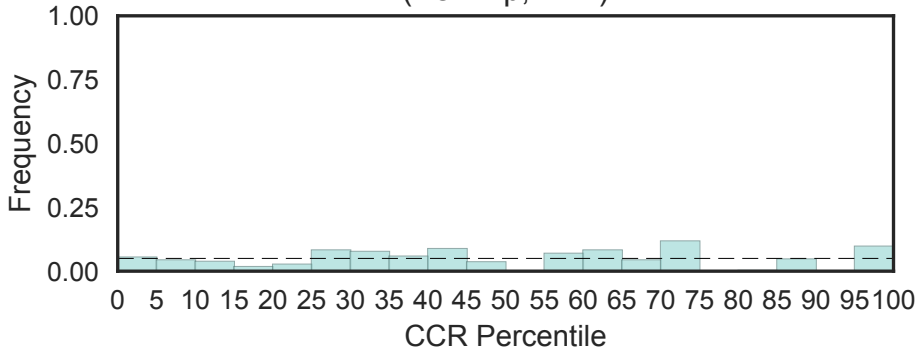

Pex26 protein  
(Pex26, N=1)

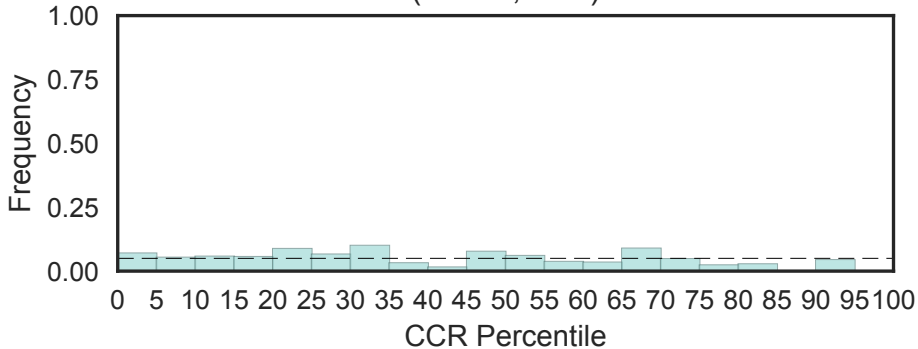

Pex2 / Pex12 amino terminal region  
(Pex2\_Pex12, N=3)

Fisher's OR: 0; Bonferroni p-val: 1

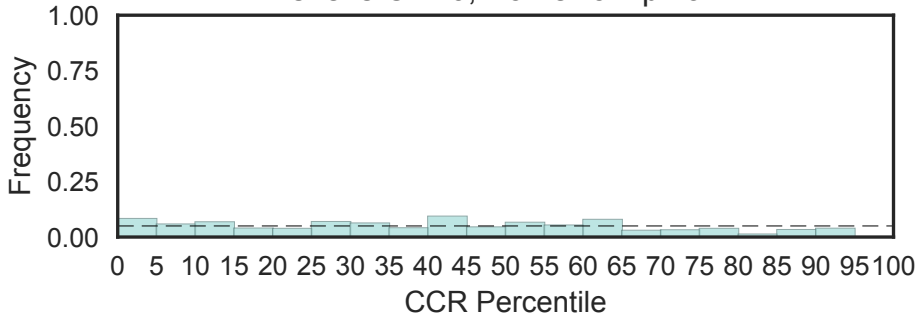

pfkB family carbohydrate kinase  
(PfkB, N=5)

Fisher's OR: 0.799; Bonferroni p-val: 1

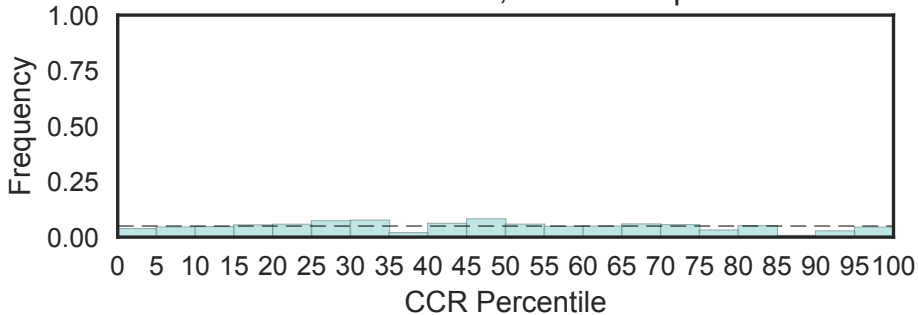

Phage tail fibre repeat  
(Phage\_fiber, N=1)

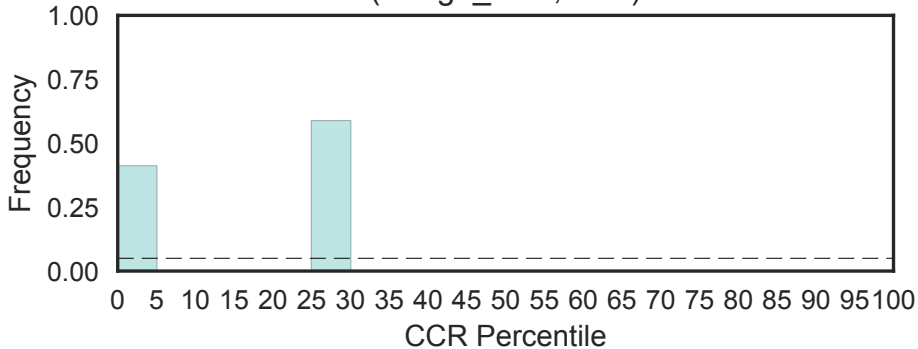

Phenylalanine zipper  
(Phe\_ZIP, N=3)

Fisher's OR: 0; Bonferroni p-val: 1

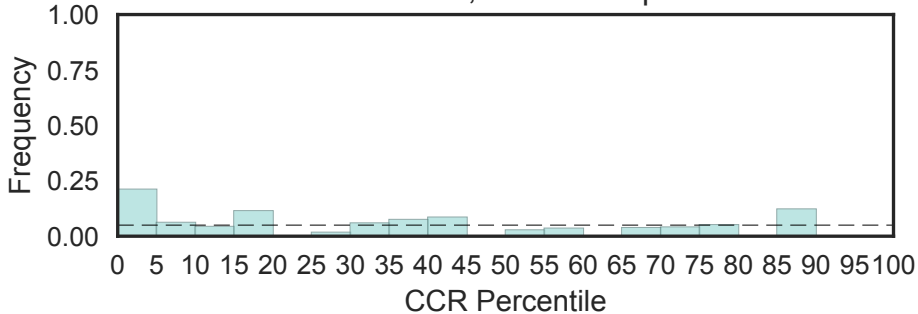



Phospholipid-translocating P-type ATPase C-terminal  
(PhoLip\_ATPase\_C, N=16)

Fisher's OR: 0.933; Bonferroni p-val: 1

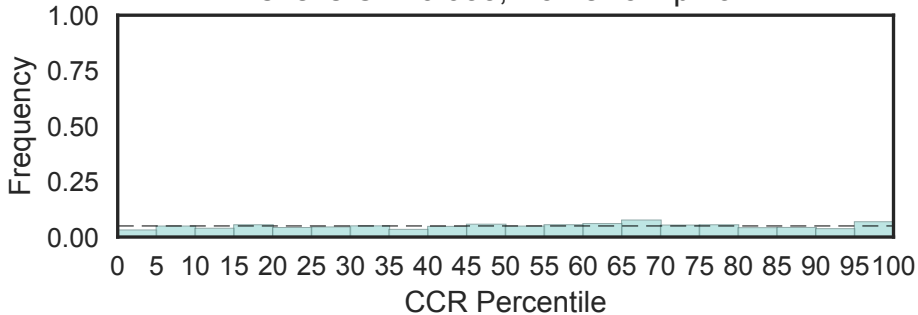

Phospholipid-translocating ATPase N-terminal  
(PhoLip\_ATPase\_N, N=13)

Fisher's OR: 1.13; Bonferroni p-val: 1

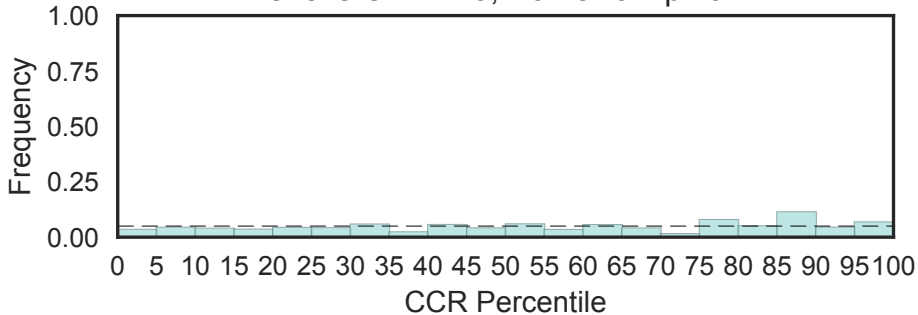

Phosphomethylpyrimidine kinase  
(Phos\_pyr\_kin, N=3)

Fisher's OR: 0; Bonferroni p-val: 1

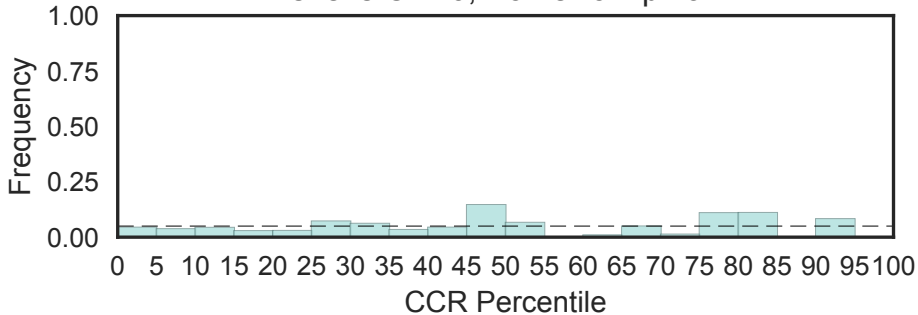

# Phosducin

(Phosducin, N=5)

Fisher's OR: 0.337; Bonferroni p-val: 1

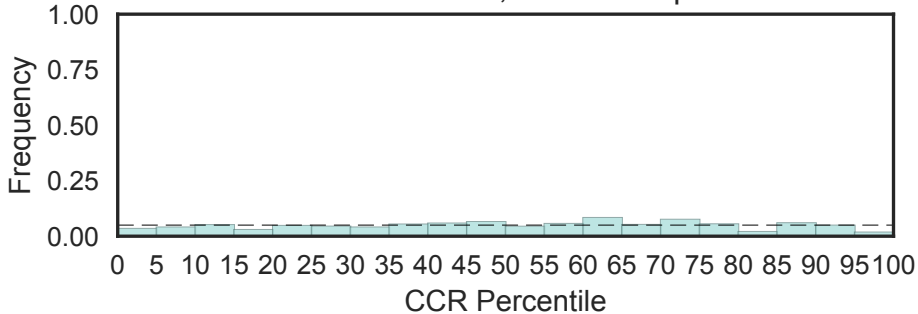

DNA-binding nuclear phosphoprotein p8  
(Phospho\_p8, N=2)

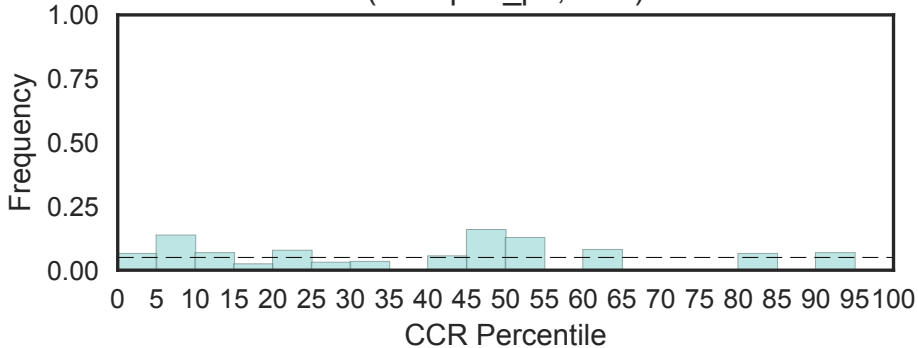

Type I phosphodiesterase / nucleotide pyrophosphatase  
(Phosphodiester, N=15)

Fisher's OR: 0.235; Bonferroni p-val: 1

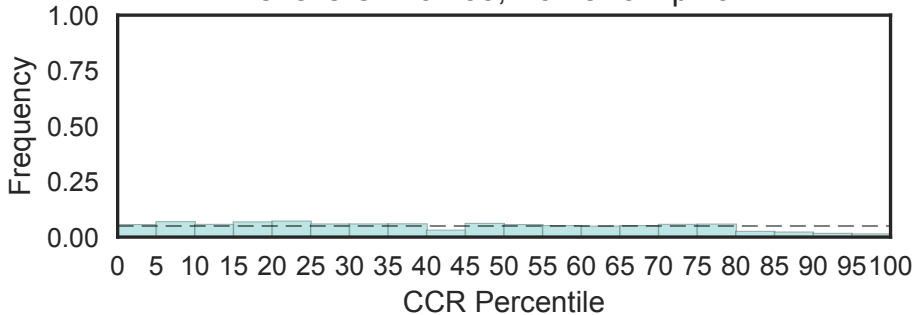

# Phospholamban (Phospholamban, N=1)

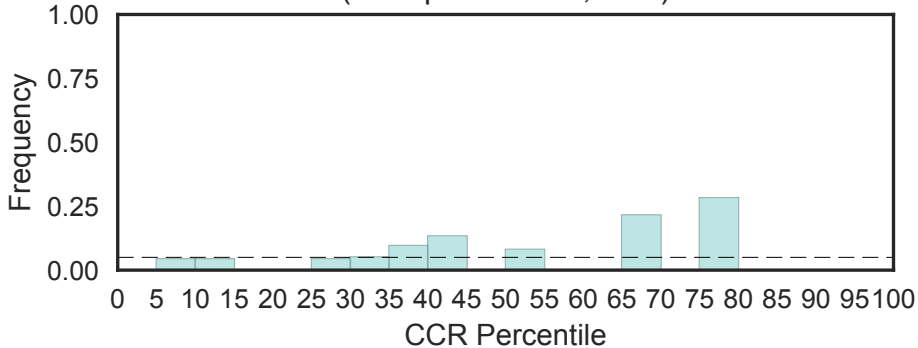

Phospholipase A2  
(Phospholip\_A2\_1, N=10)  
Fisher's OR: 0; Bonferroni p-val: 1

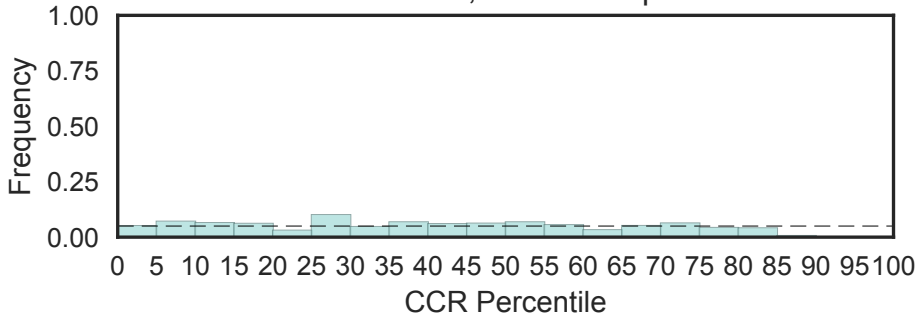



Phospholipase A2  
(Phospholip\_A2\_2, N=3)  
Fisher's OR: 0; Bonferroni p-val: 1

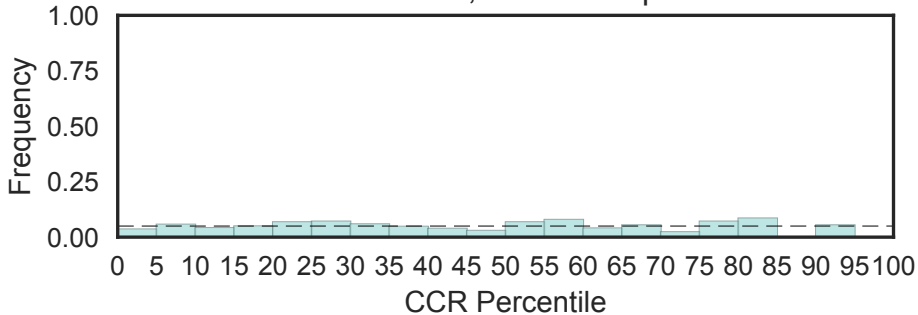

Phospholipase B  
(Phospholip\_B, N=2)

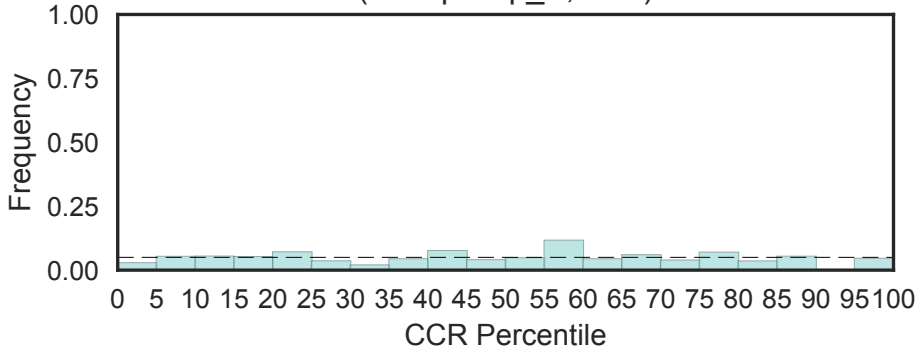

ABC transporter, phosphonate, periplasmic substrate-binding protein  
(Phosphonate-bd, N=3)

Fisher's OR: 0; Bonferroni p-val: 1

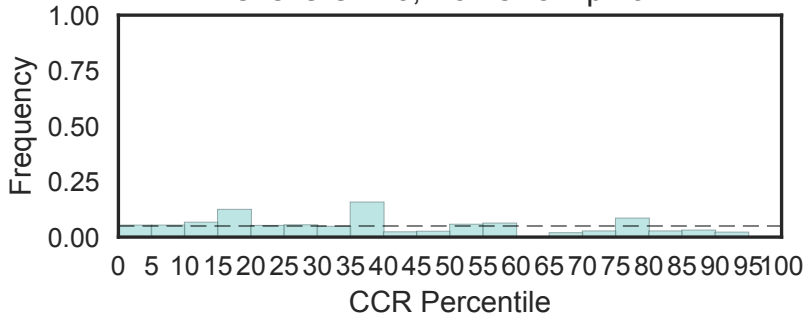

Carbohydrate phosphorylase  
(Phosphorylase, N=4)

Fisher's OR: 0.108; Bonferroni p-val: 1

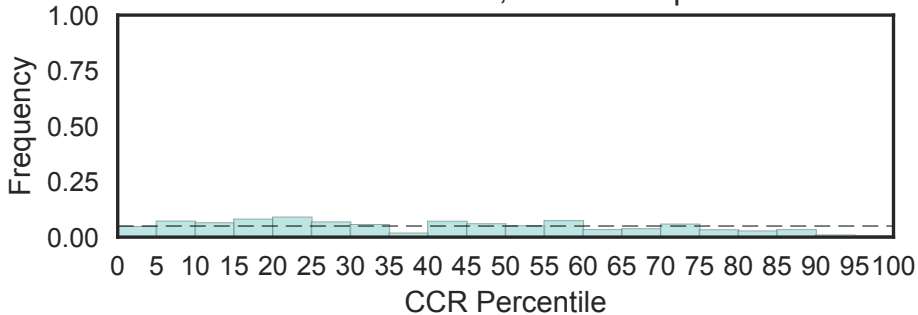

Phostensin PP1-binding and SH3-binding region  
(Phostensin, N=2)

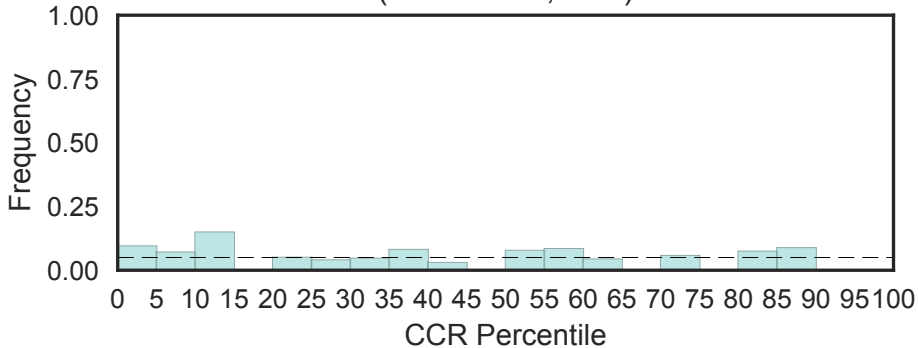

Male germ-cell putative homeodomain transcription factor  
(Phtf-FEM1B\_bdg, N=2)

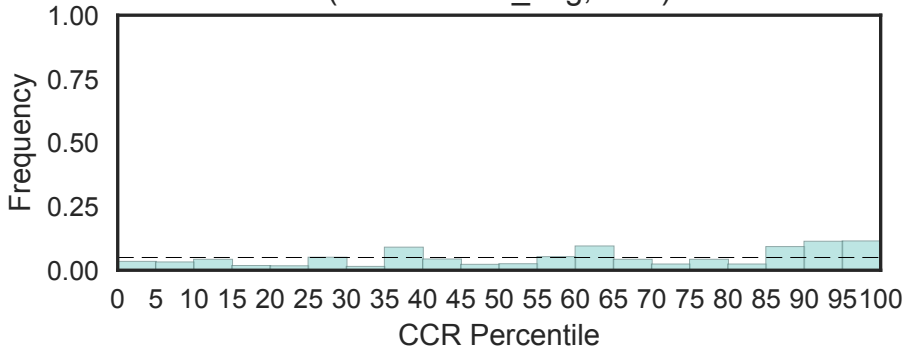

Phytanoyl-CoA dioxygenase (PhyH)  
(PhyH, N=3)

Fisher's OR: 0; Bonferroni p-val: 1

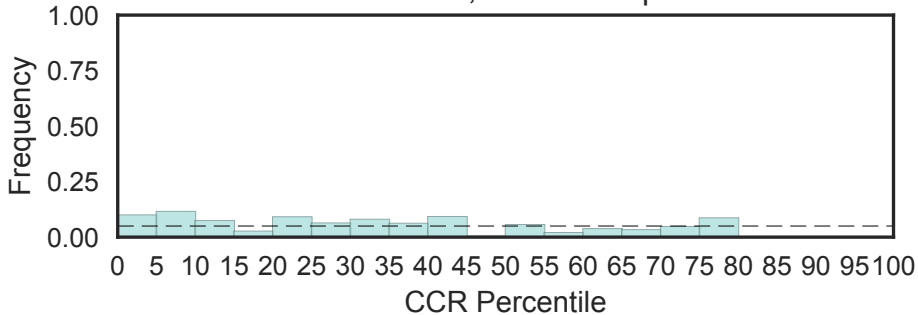

Phenazine biosynthesis-like protein  
(PhzC-PhzF, N=1)

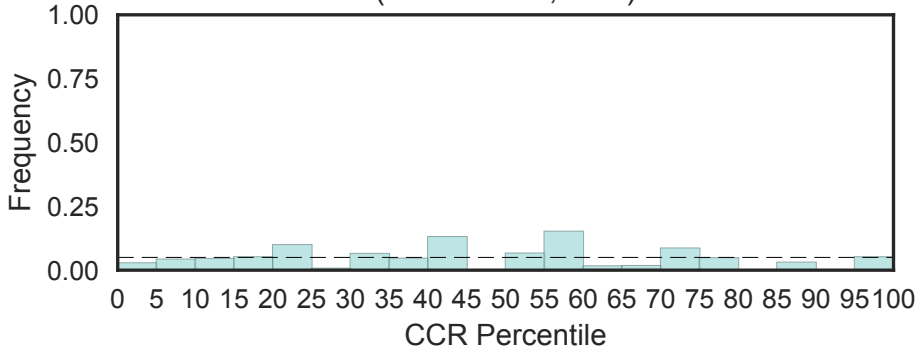



Piezo non-specific cation channel, R-Ras-binding domain  
(Piezo\_RRas\_bdg, N=3)

Fisher's OR: 0; Bonferroni p-val: 1

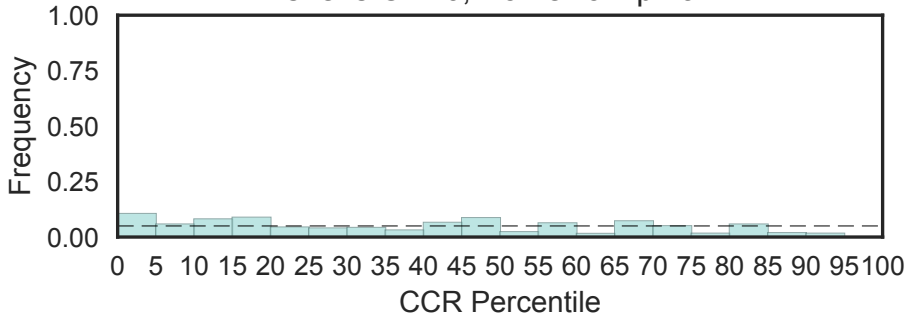

Phosphatidylinositolglycan class N (PIG-N)  
(PigN, N=1)

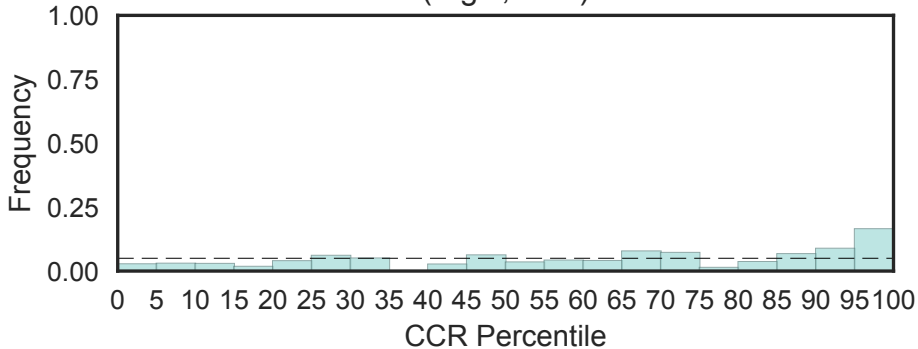

pinin/SDK conserved region  
(Pinin\_SDK\_N, N=1)

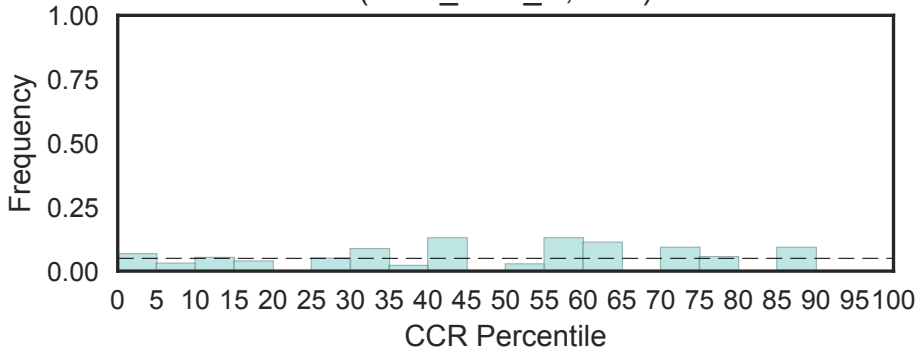

pinin/SDK/memA/ protein conserved region  
(Pinin\_SDK\_memA, N=1)

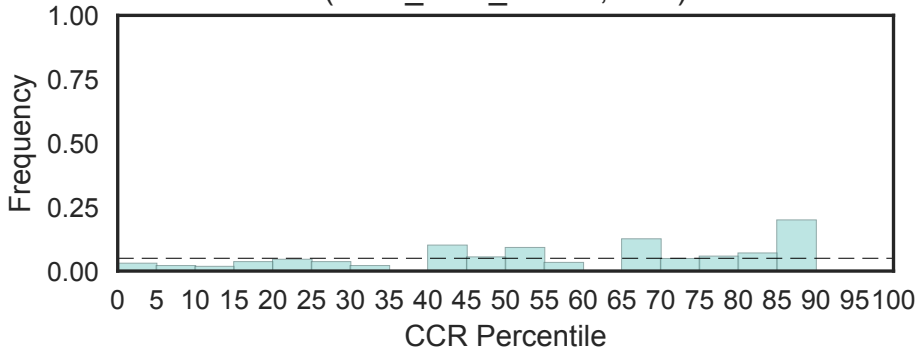

Piwi domain  
(Piwi, N=8)

Fisher's OR: 3.15; Bonferroni p-val: 0.131

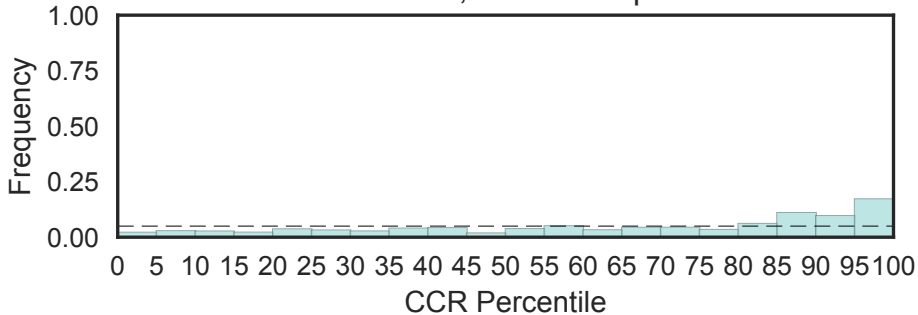

Protein kinase domain  
(Pkinase, N=507)

Fisher's OR: 2.61; Bonferroni p-val: 3.19e-118

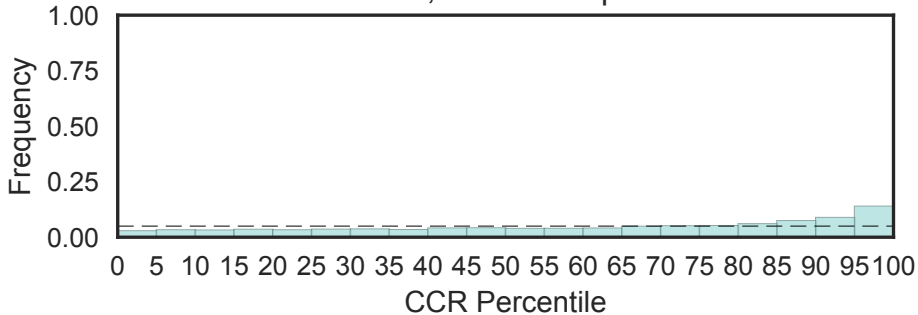

Protein kinase C terminal domain  
(Pkinase\_C, N=34)  
Fisher's OR: 0.681; Bonferroni p-val: 1

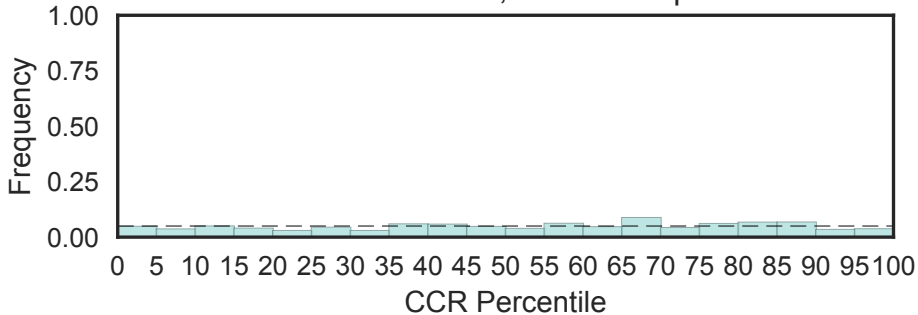

Protein tyrosine kinase  
(Pkinase\_Tyr, N=497)

Fisher's OR: 2.69; Bonferroni p-val: 8.71e-121

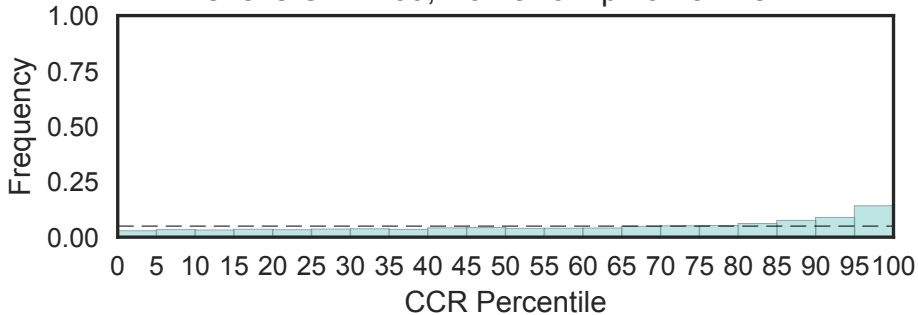



Plant transposon protein  
(Plant\_tran, N=1)

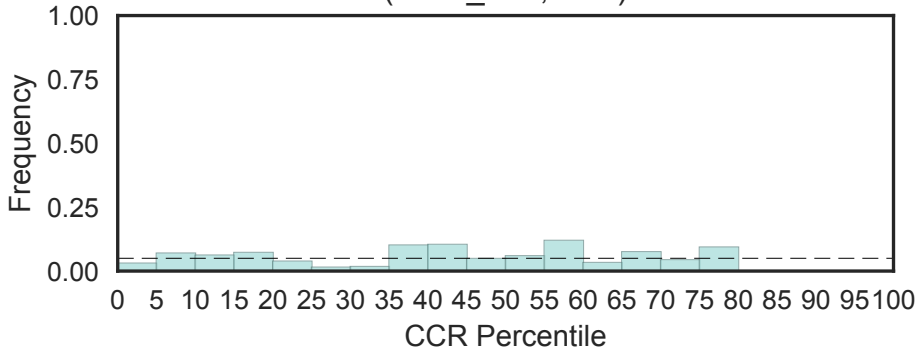

Plectin repeat  
(Plectin, N=53)

Fisher's OR: 0.296; Bonferroni p-val: 1

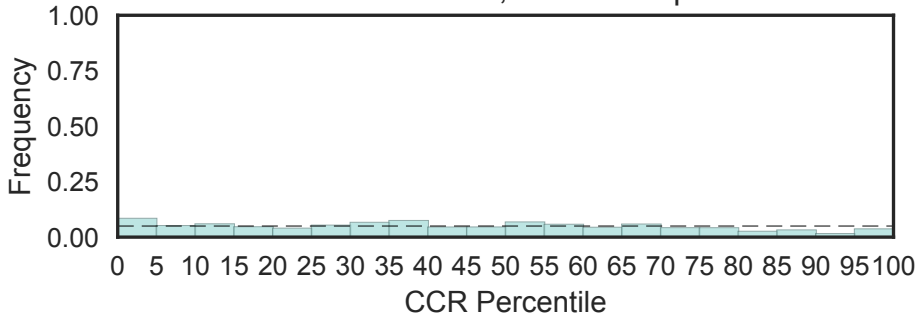

Plexin cytoplasmic RasGAP domain  
(Plexin\_cytopl, N=10)

Fisher's OR: 2.1; Bonferroni p-val: 1

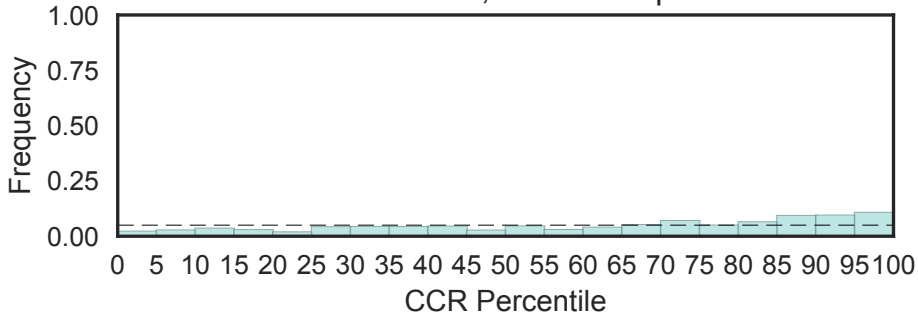

Plug domain of Sec61p  
(Plug\_translocon, N=2)

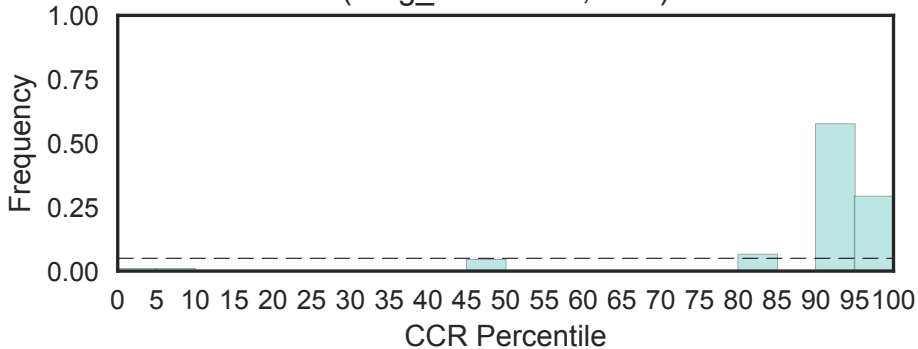

Plus-3 domain  
(Plus-3, N=1)

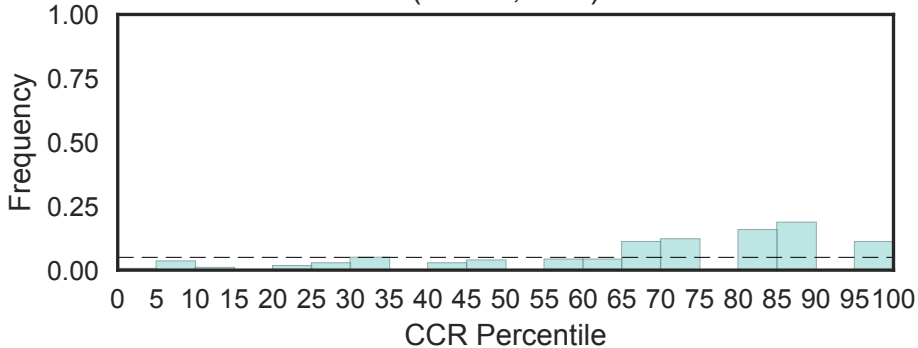

# Podoplanin (Podoplanin, N=1)

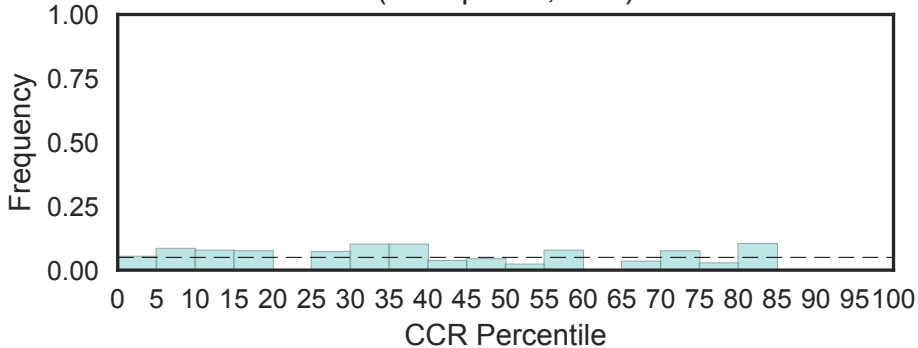

DNA polymerase alpha subunit B N-terminal  
(Pol\_alpha\_B\_N, N=1)

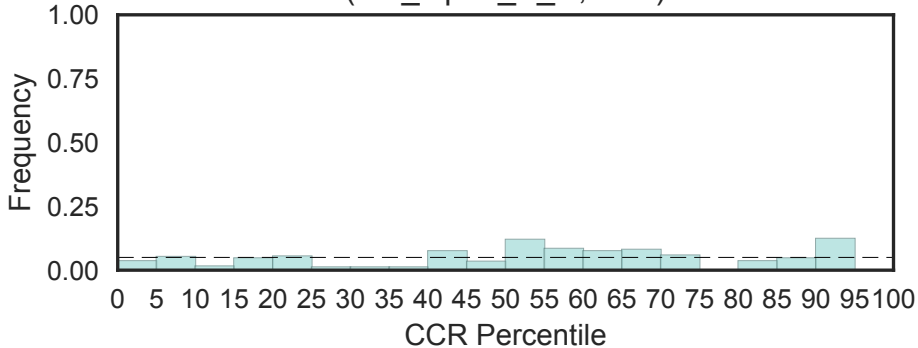

Poly A polymerase head domain  
(PolyA\_pol, N=1)

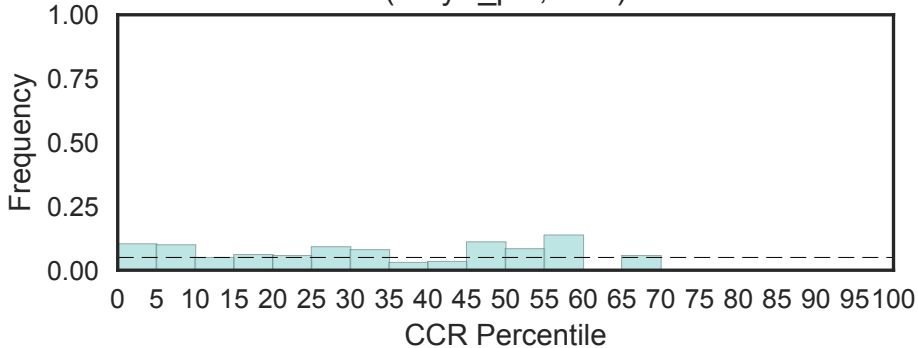



Probable RNA and SrmB- binding site of polymerase A  
(PolyA\_pol\_RNAbd, N=1)

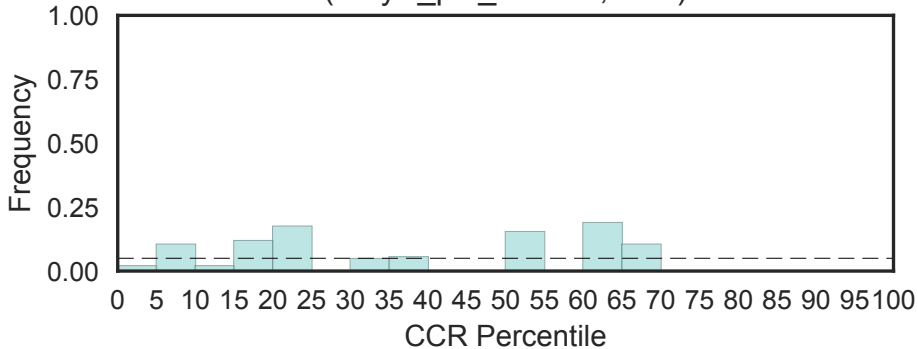

Polyketide cyclase / dehydrase and lipid transport  
(Polyketide\_cyc, N=2)

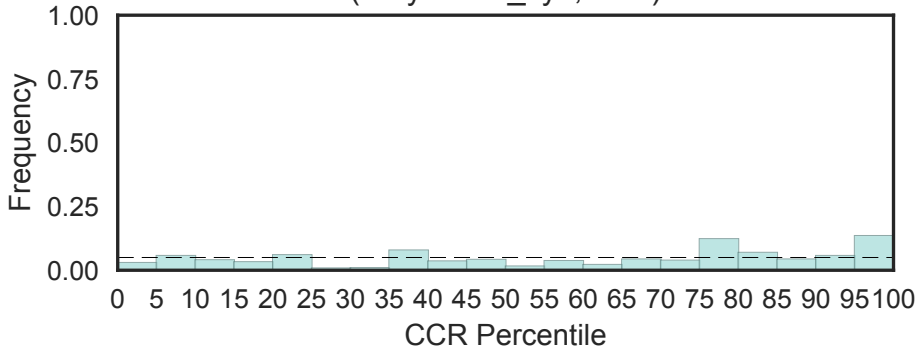

Polysaccharide biosynthesis protein  
(Polysacc\_synt\_2, N=12)  
Fisher's OR: 0.527; Bonferroni p-val: 1

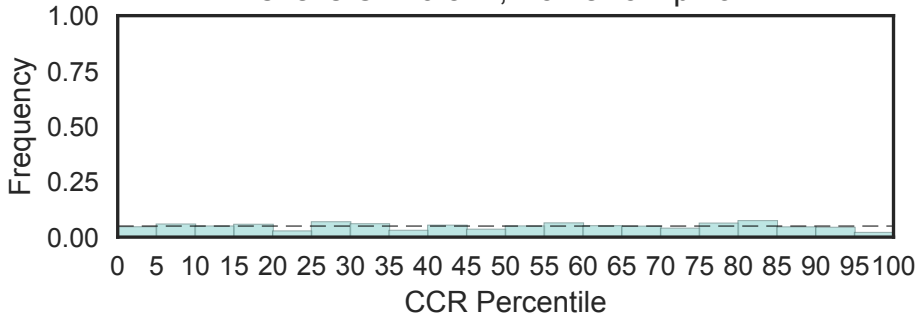

Popeye protein conserved region  
(Popeye, N=3)

Fisher's OR: 0; Bonferroni p-val: 1

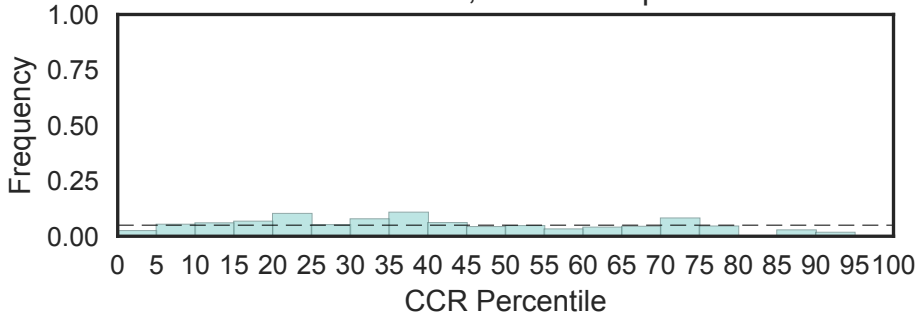

Eukaryotic porin  
(Porin\_3, N=5)

Fisher's OR: 1.28; Bonferroni p-val: 1

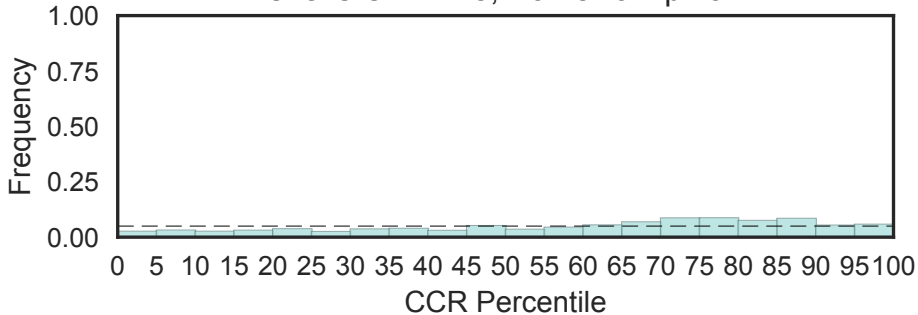

Porphobilinogen deaminase, dipyromethane cofactor binding domain  
(Porphobil\_deam, N=1)

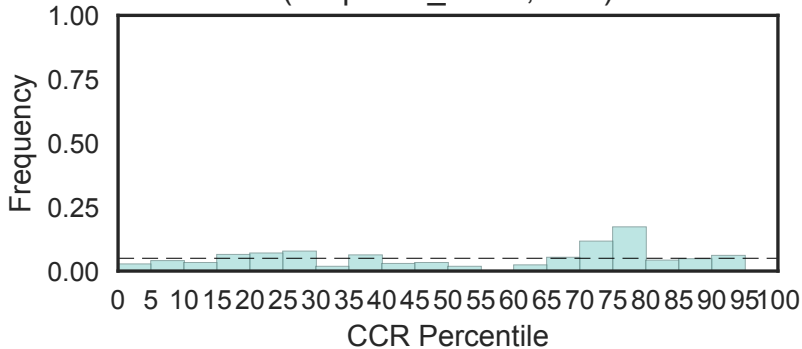

Porphobilinogen deaminase, C-terminal domain  
(Porphobil\_deamC, N=1)

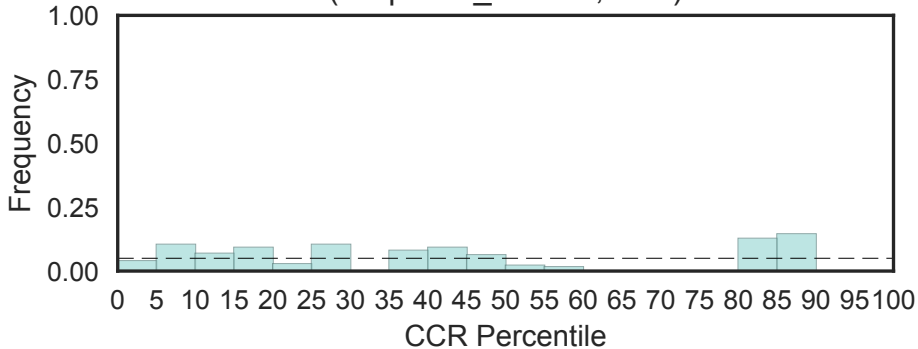

Potassium voltage-gated channel  
(Potassium\_chann, N=2)

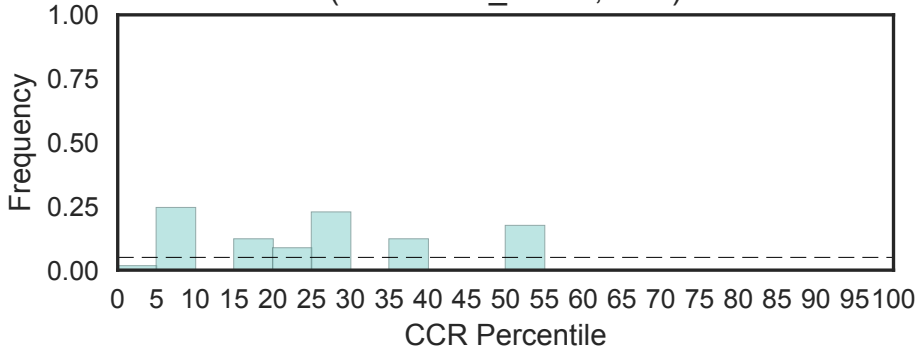



Pou domain - N-terminal to homeobox domain  
(Pou, N=16)

Fisher's OR: 3.52; Bonferroni p-val: 1

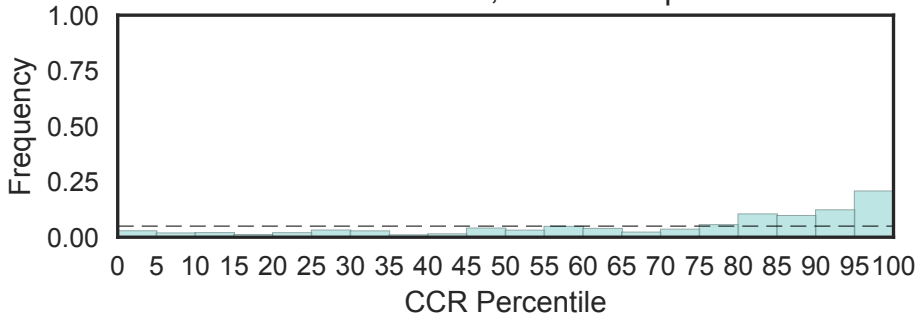

Poxvirus D5 protein-like  
(Pox\_D5, N=1)

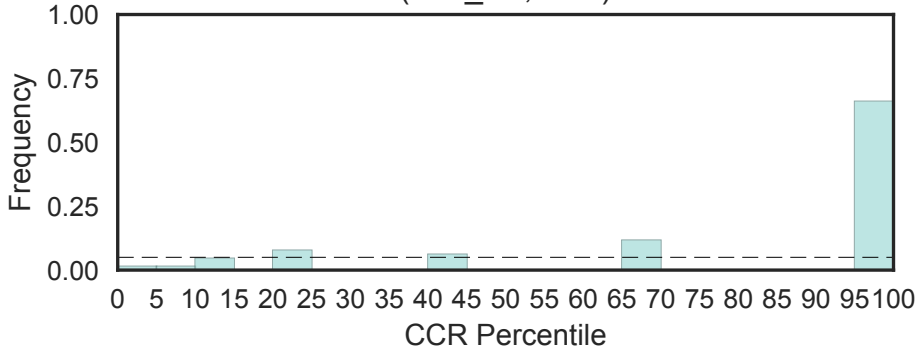

mRNA capping enzyme  
(Pox\_MCEL, N=1)

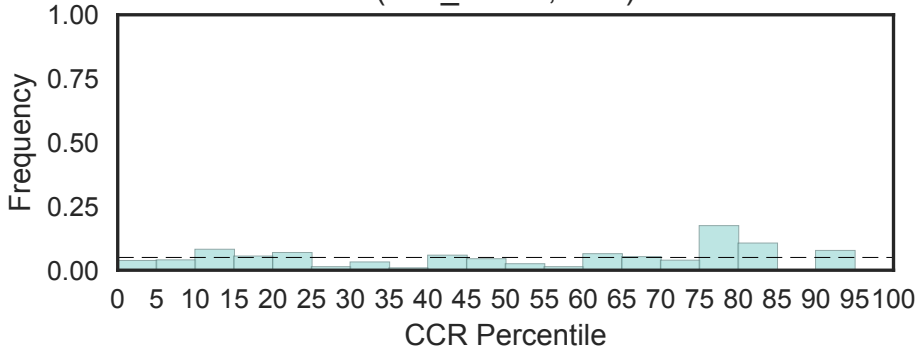

Proteasome beta subunits C terminal  
(Pr\_beta\_C, N=2)

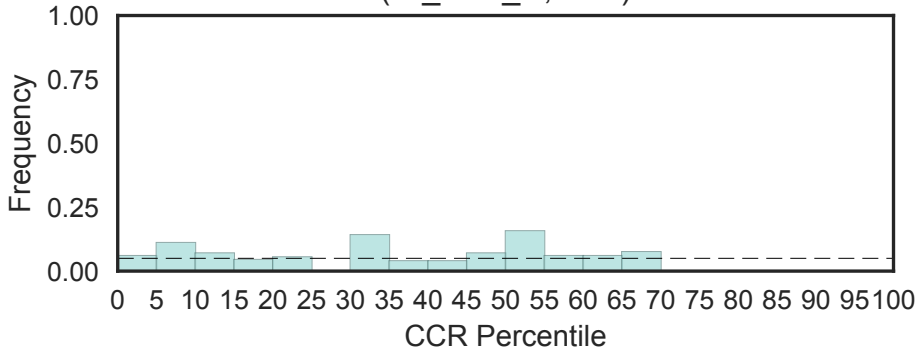

Pre-SET motif  
(Pre-SET, N=6)

Fisher's OR: 1.14; Bonferroni p-val: 1

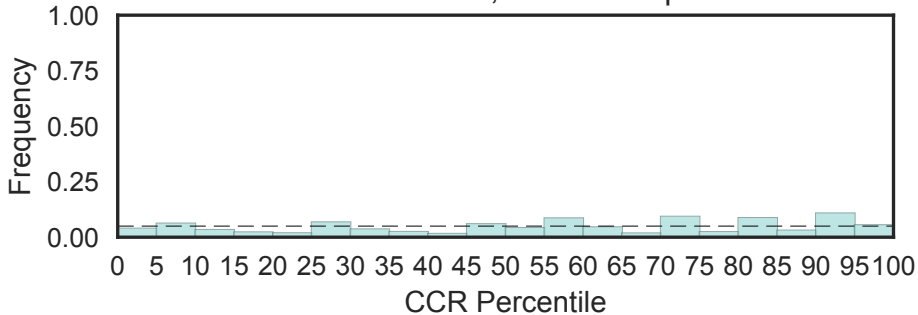

Prefoldin subunit  
(Prefoldin, N=2)

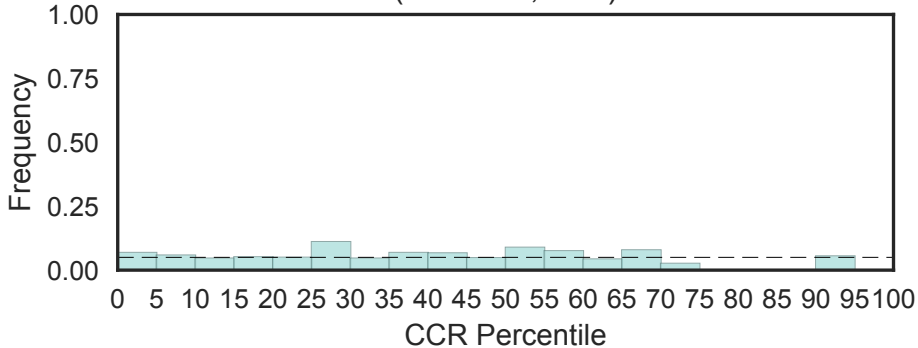

# Prefoldin subunit

(Prefoldin\_2, N=5)

Fisher's OR: 1.91; Bonferroni p-val: 1

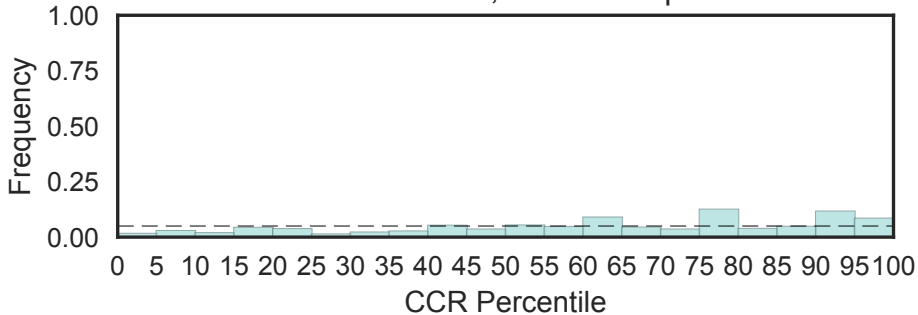

Prefoldin subunit  
(Prefoldin\_3, N=1)

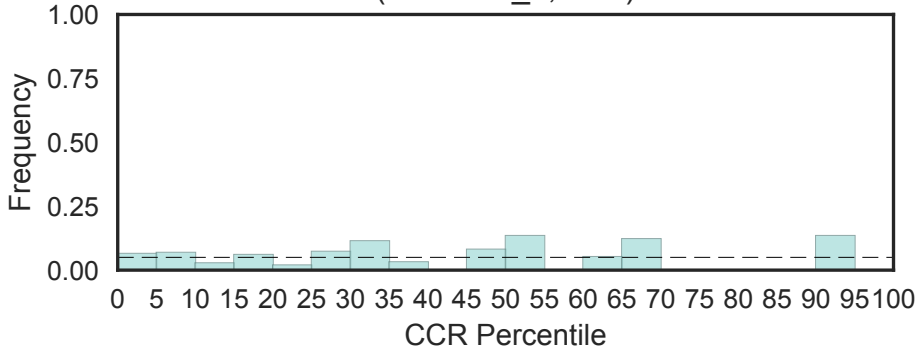



Prenylcysteine lyase  
(Prenylcys\_lyase, N=2)

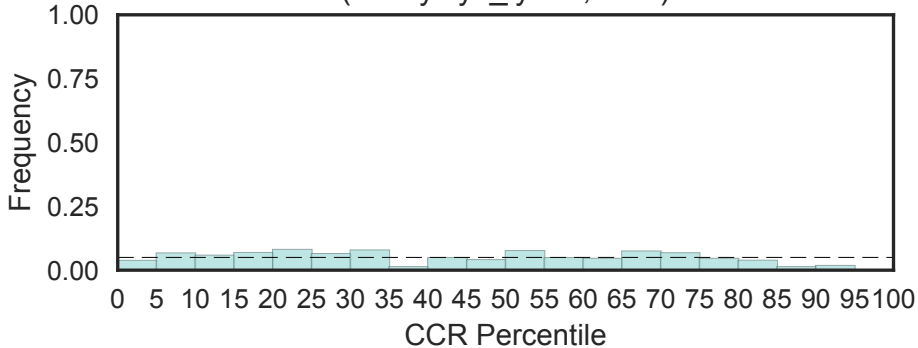

Prenyltransferase and squalene oxidase repeat  
(Prenyltrans, N=25)

Fisher's OR: 2.65; Bonferroni p-val: 1

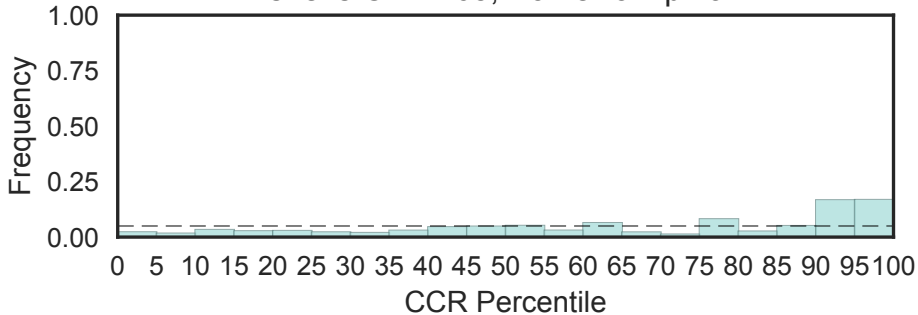

Putative undecaprenyl diphosphate synthase  
(Prenyltransf, N=2)

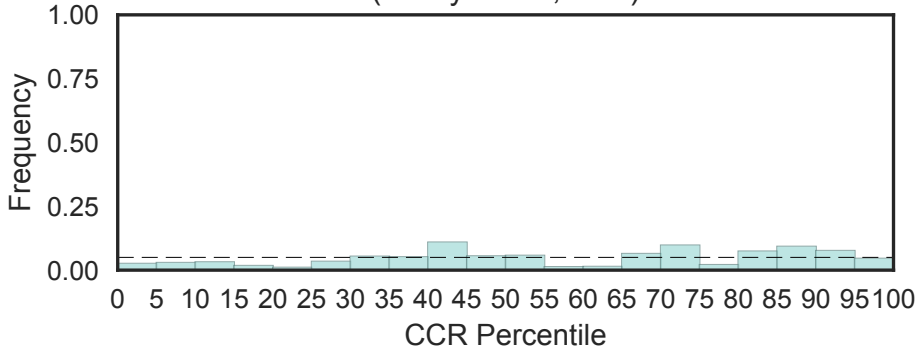

Presenilin  
(Presenilin, N=3)

Fisher's OR: 1.31; Bonferroni p-val: 1

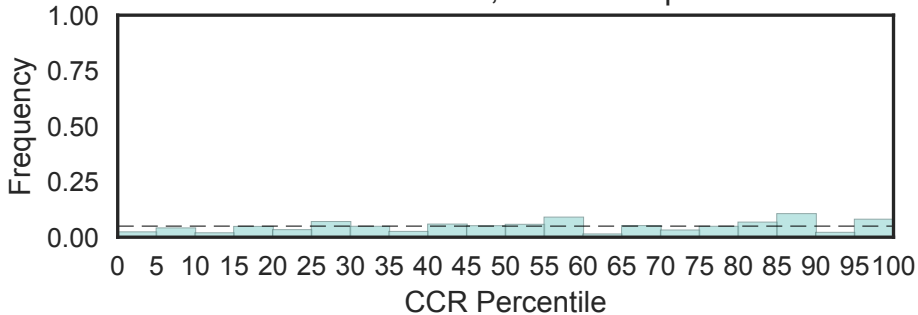

5-aminolevulinate synthase presequence  
(Preseq\_ALAS, N=1)

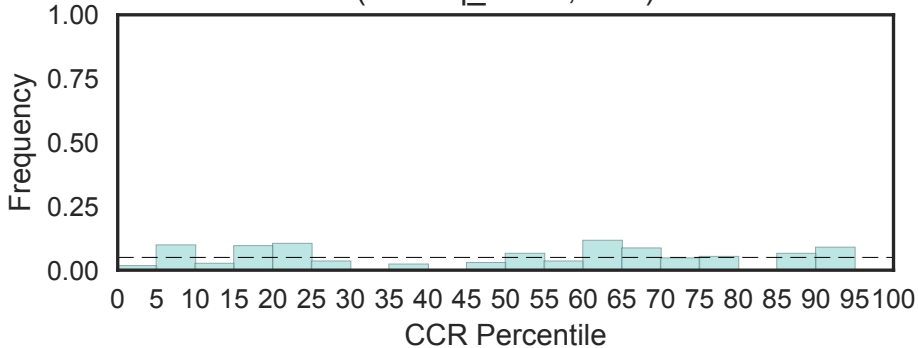

Phosphoribosyl synthetase-associated domain  
(Pribosyl\_synth, N=3)

Fisher's OR: 0.611; Bonferroni p-val: 1

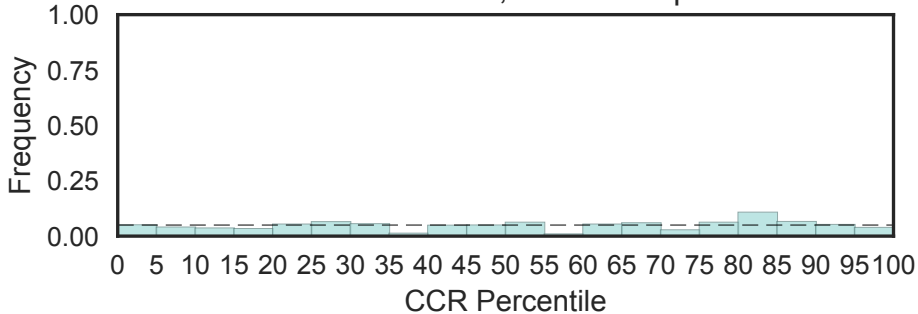

Phosphoribosyl transferase domain  
(Pribosyltran, N=7)

Fisher's OR: 0.908; Bonferroni p-val: 1

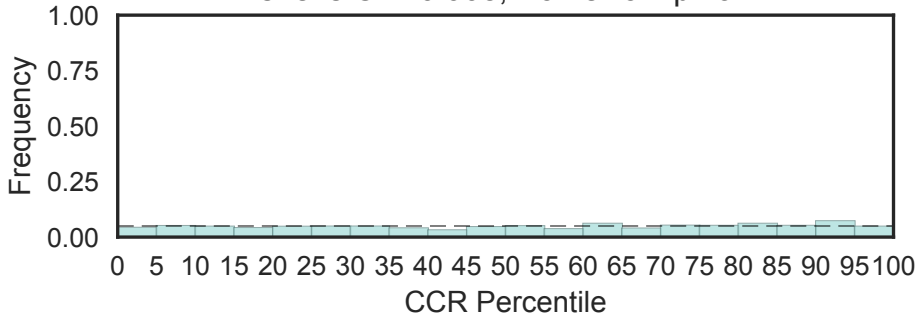

N-terminal domain of ribose phosphate pyrophosphokinase  
(Pribosyltran\_N, N=3)

Fisher's OR: 0; Bonferroni p-val: 1

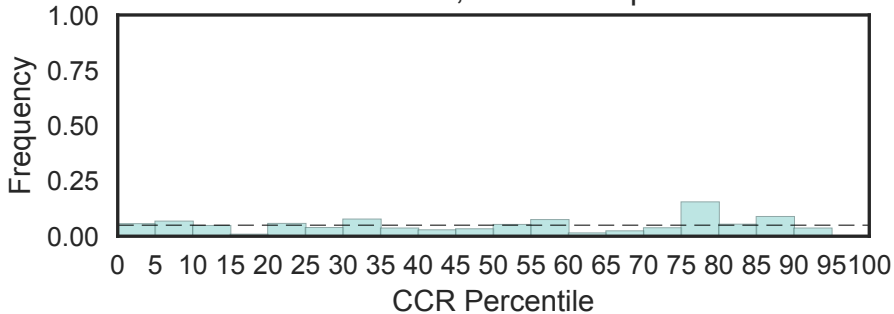



Prion/Doppel alpha-helical domain  
(Prion, N=2)

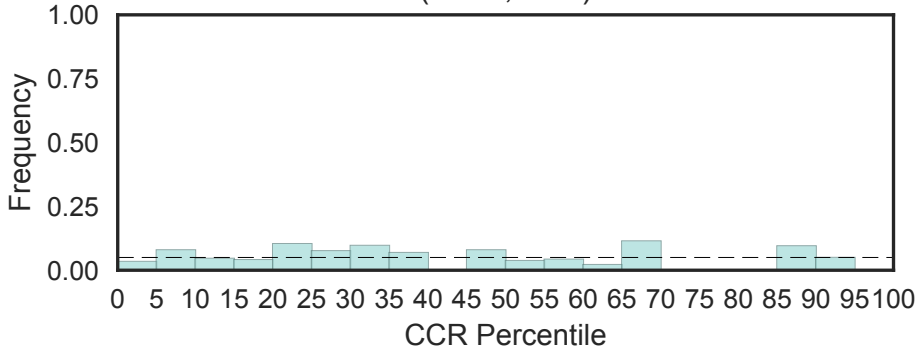

Major prion protein bPrPp - N terminal  
(Prion\_bPrPp, N=1)

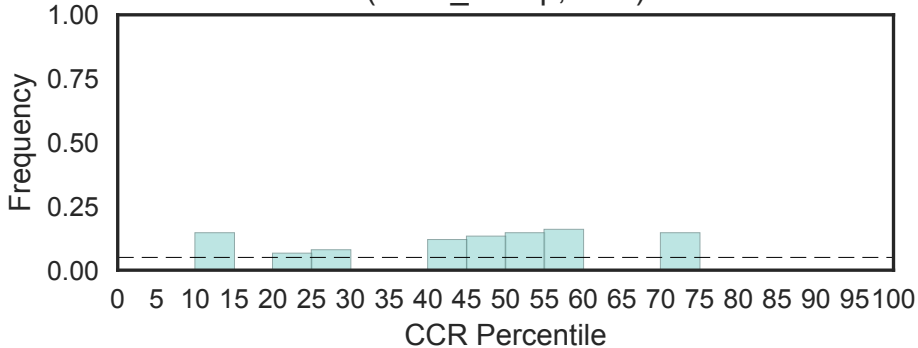

Copper binding octapeptide repeat  
(Prion\_octapep, N=3)

Fisher's OR: 0; Bonferroni p-val: 1

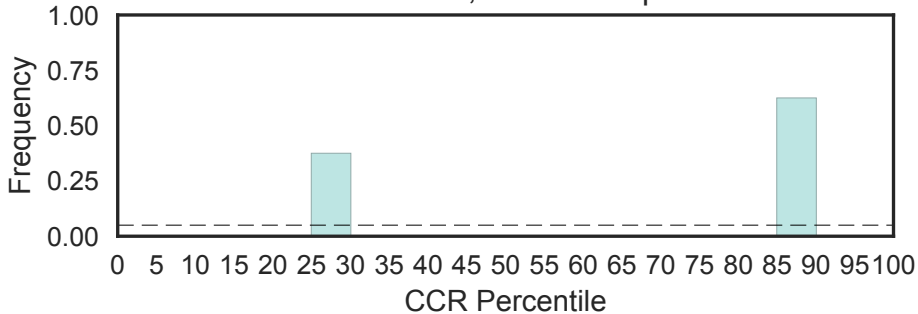

Ribosomal protein L11 methyltransferase (PrmA)  
(PrmA, N=17)

Fisher's OR: 1.33; Bonferroni p-val: 1

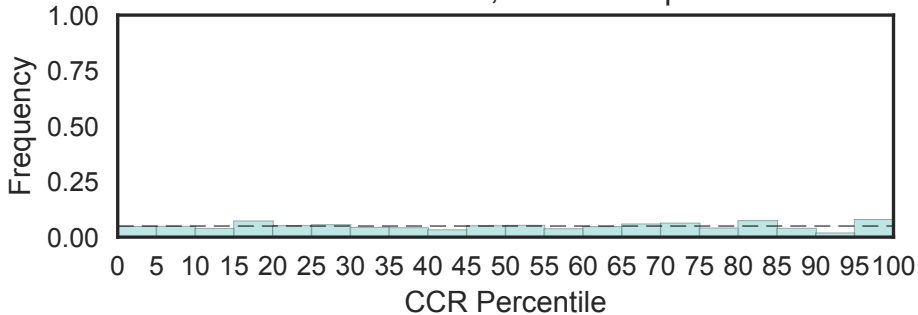

Pro-melanin-concentrating hormone (Pro-MCH)  
(Pro-MCH, N=1)

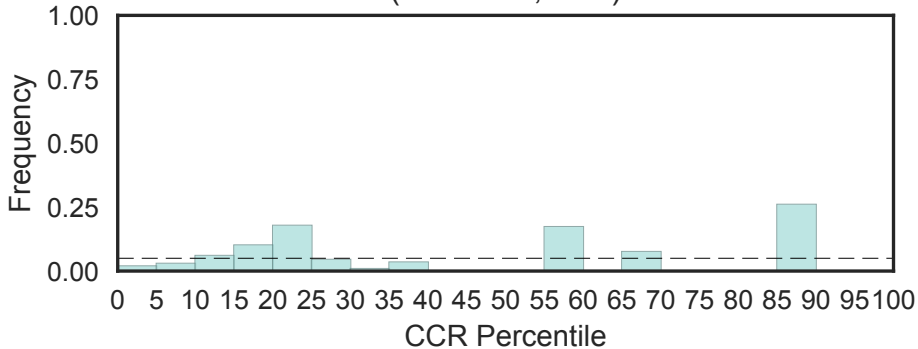

Neurotensin/neuromedin N precursor  
(Pro-NT\_NN, N=1)

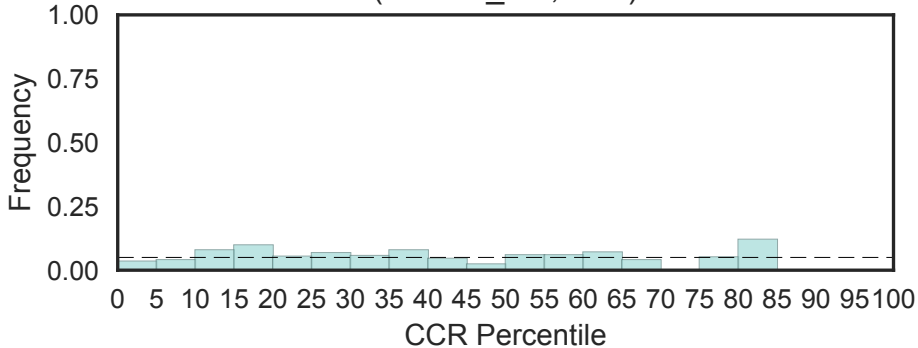

Pro-kumamolisin, activation domain  
(Pro-kuma\_activ, N=1)

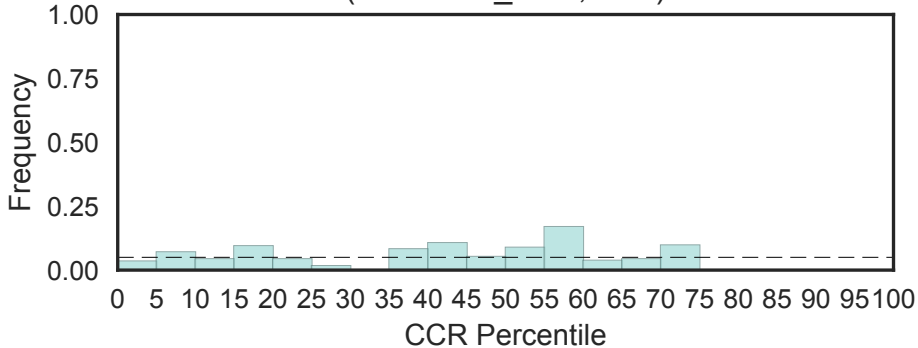

Proline-rich

(Pro-rich, N=13)

Fisher's OR: 0; Bonferroni p-val: 1

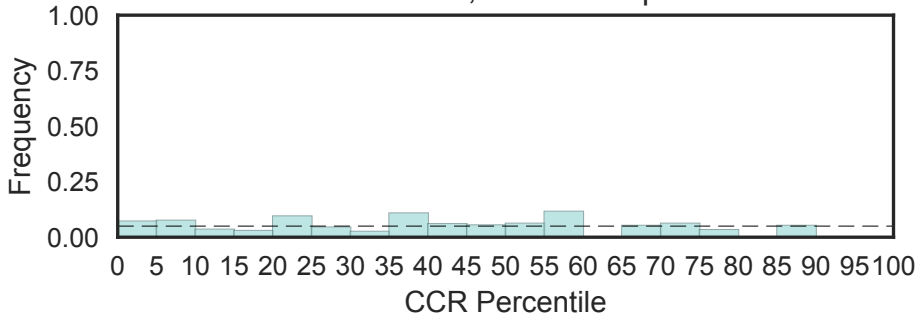



Proline-rich 19  
(Pro-rich\_19, N=1)

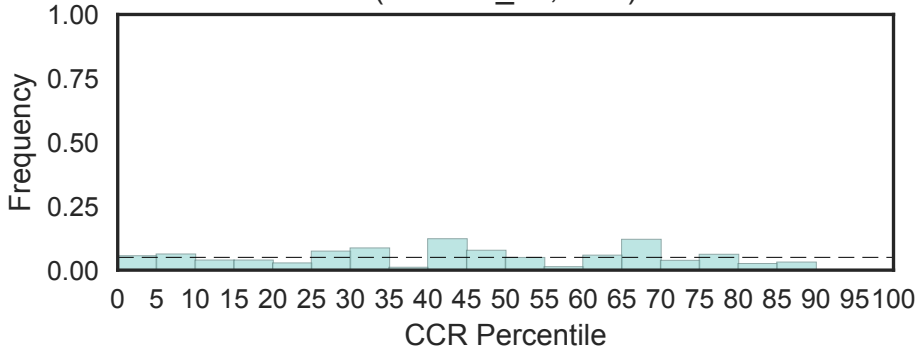

Prolyl-tRNA synthetase, C-terminal  
(ProRS-C\_1, N=1)

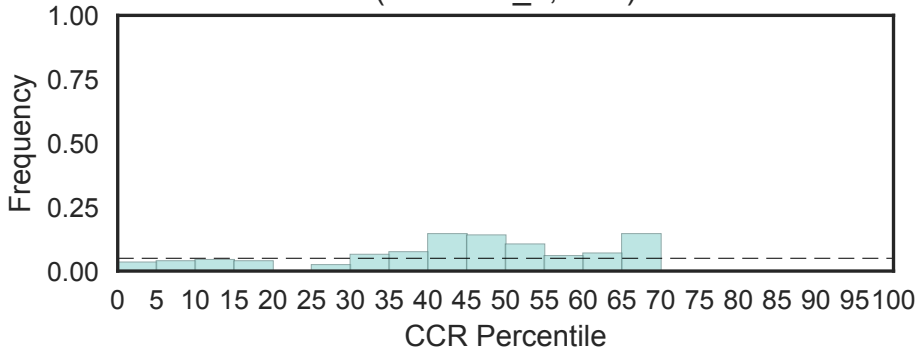

Proline dehydrogenase  
(Pro\_dh, N=2)

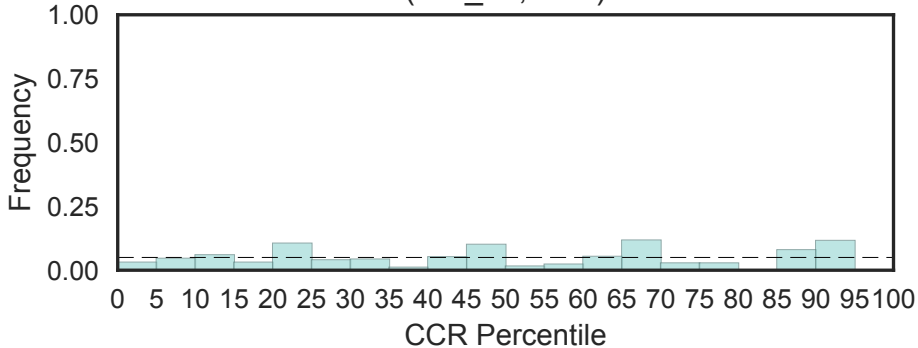

Cyclophilin type peptidyl-prolyl cis-trans isomerase/CLD  
(Pro\_isomerase, N=24)

Fisher's OR: 0.881; Bonferroni p-val: 1

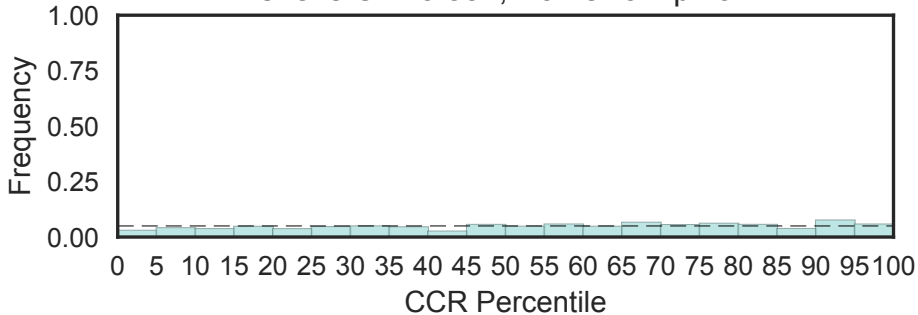

Proline racemase  
(Pro\_racemase, N=1)

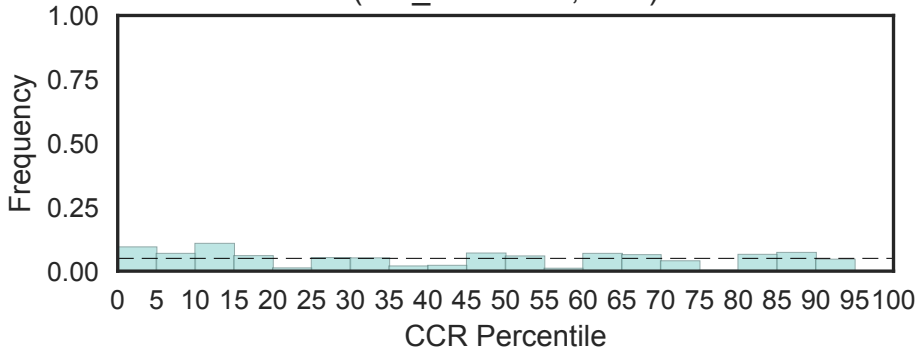

Profilin  
(Profilin, N=4)

Fisher's OR: 2.07; Bonferroni p-val: 1

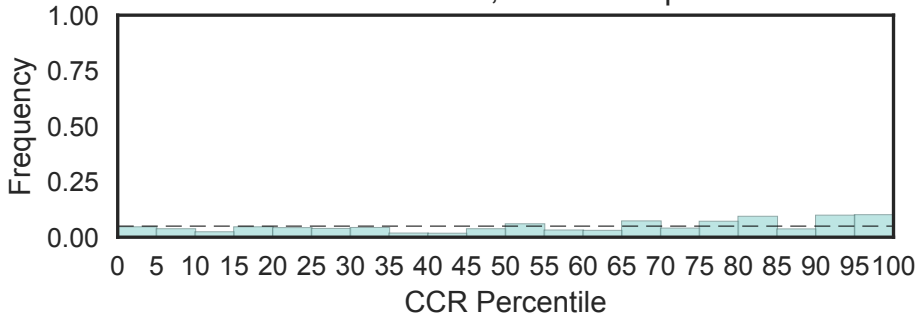

Progesterone receptor  
(Prog\_receptor, N=1)

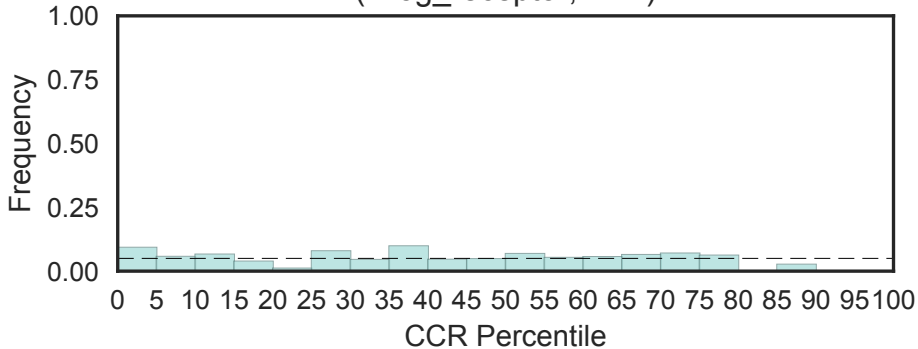

Prohormone convertase enzyme  
(Proho\_convert, N=1)

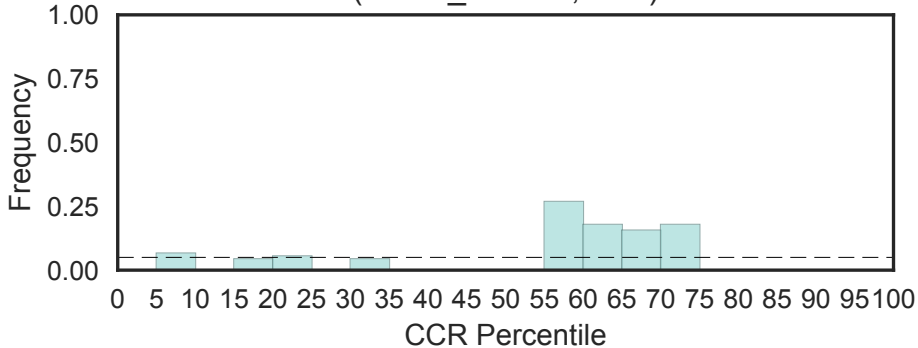



Prokaryotic E2 family B  
(Prok-E2\_B, N=1)

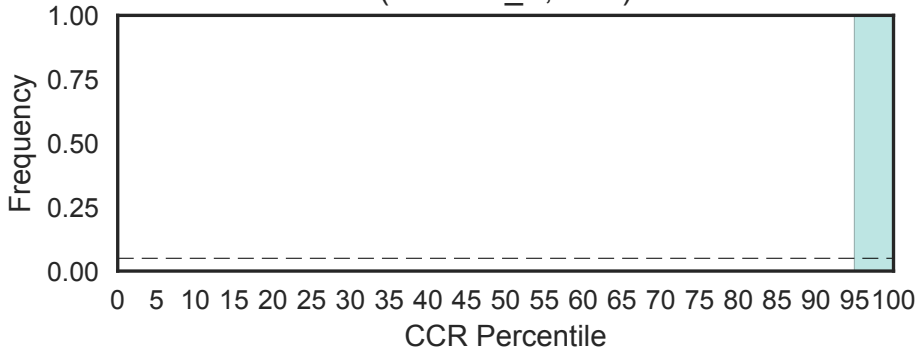

Prokaryotic homologs of the JAB domain  
(Prok-JAB, N=5)

Fisher's OR: 1.69; Bonferroni p-val: 1

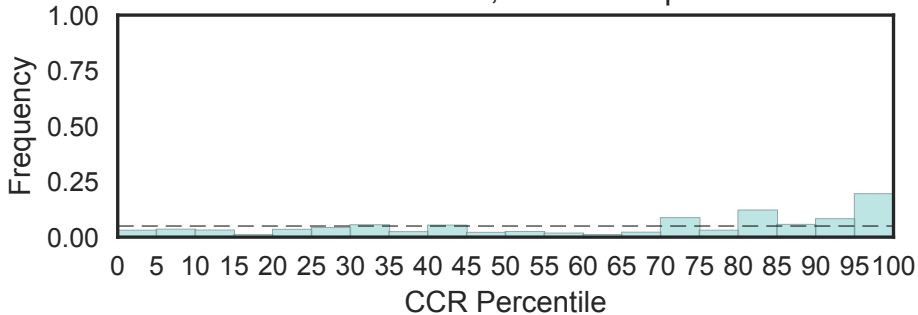

Prokaryotic RING finger family 4  
(Prok-RING\_4, N=16)  
Fisher's OR: 2.38; Bonferroni p-val: 1

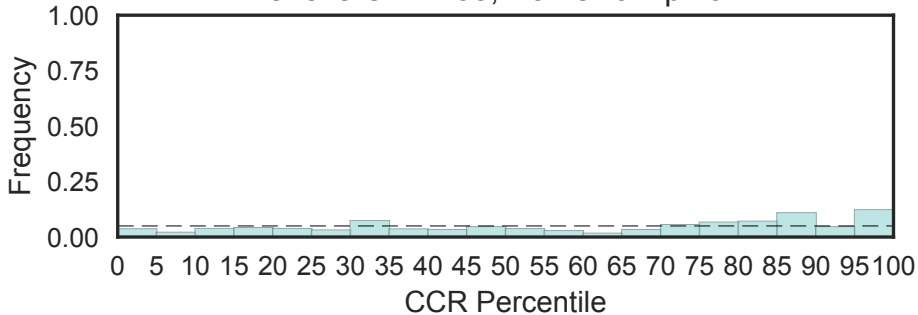

Prokineticin  
(Prokineticin, N=3)  
Fisher's OR: 0; Bonferroni p-val: 1

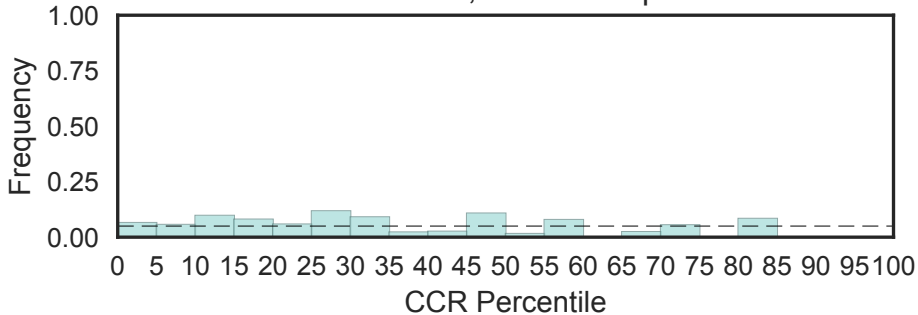

Prolactin-releasing peptide  
(Prolactin\_RP, N=1)

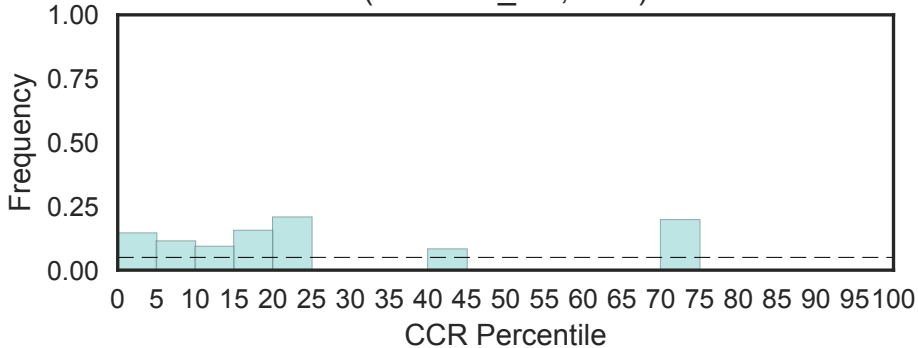

# Promethin

(Promethin, N=1)

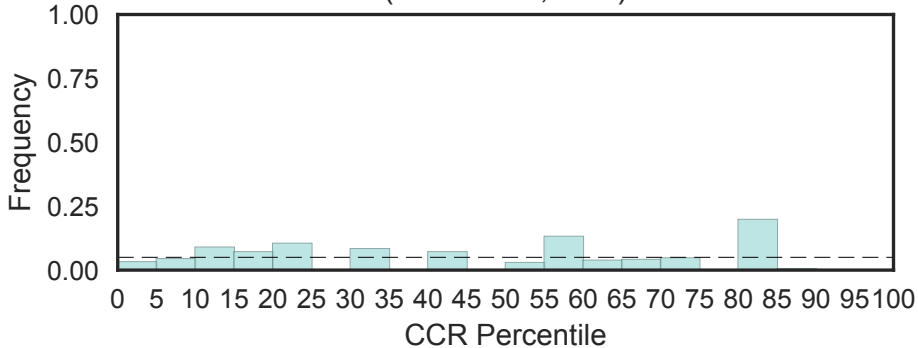

# Prominin

(Prominin, N=2)

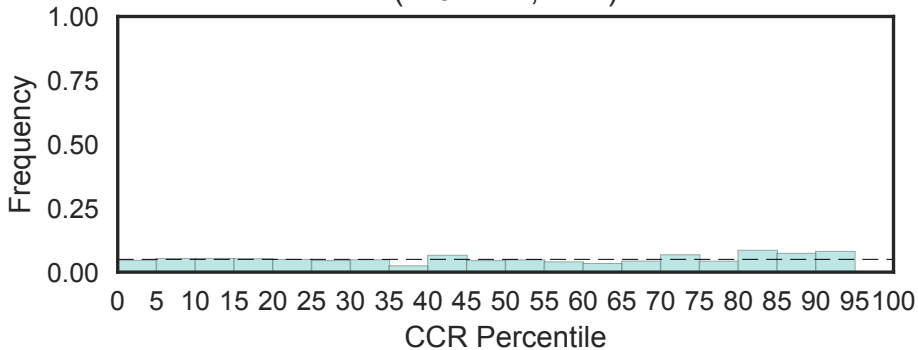

Carboxypeptidase activation peptide  
(Propep\_M14, N=8)

Fisher's OR: 0; Bonferroni p-val: 1

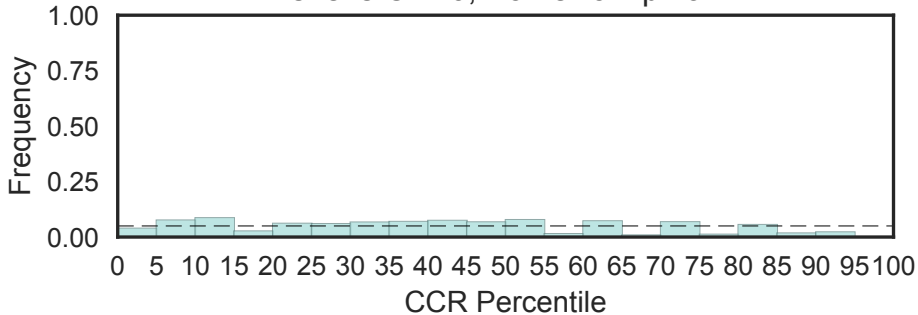



Peptidase family C1 propeptide  
(Propeptide\_C1, N=1)

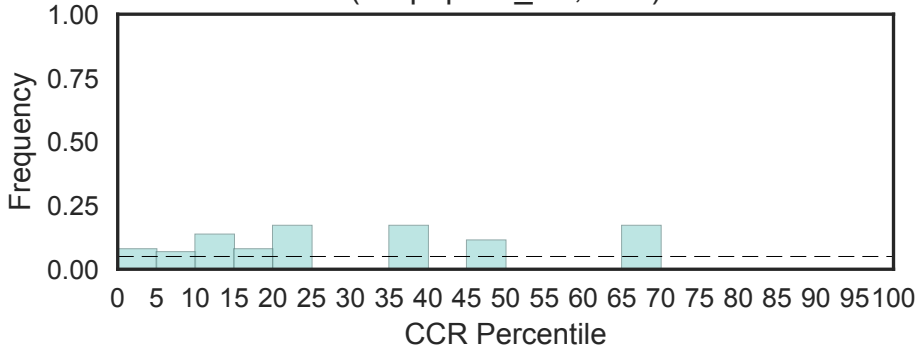

Protamine P1  
(Protamine\_P1, N=1)

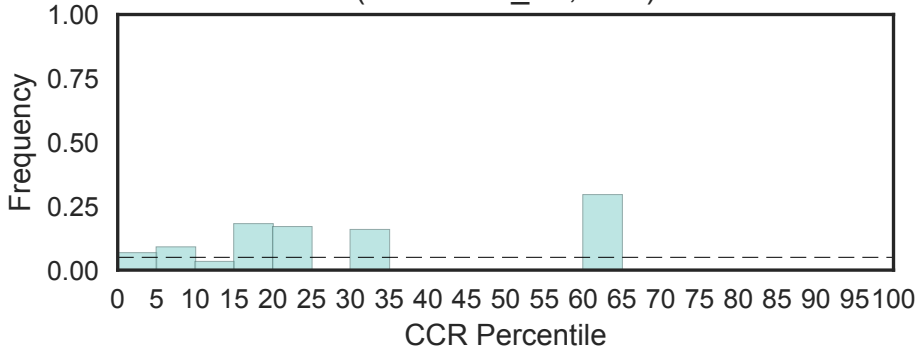

Sperm histone P2  
(Protamine\_P2, N=1)

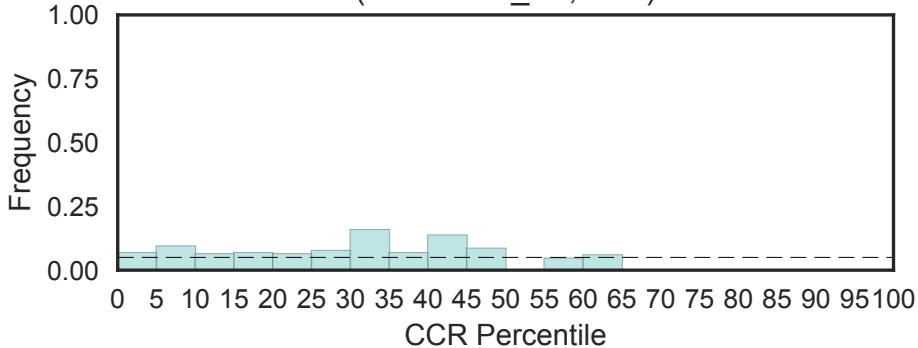

Proteasome non-ATPase 26S subunit  
(Proteasom\_PSMB, N=1)

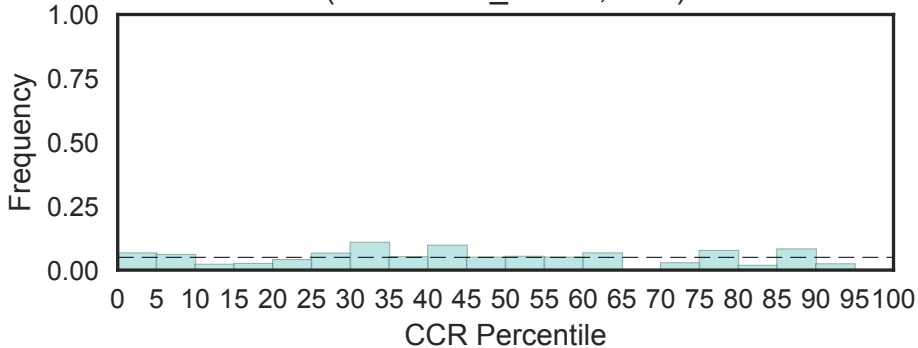

Proteasome complex subunit Rpn13 ubiquitin receptor  
(Proteasom\_Rpn13, N=1)

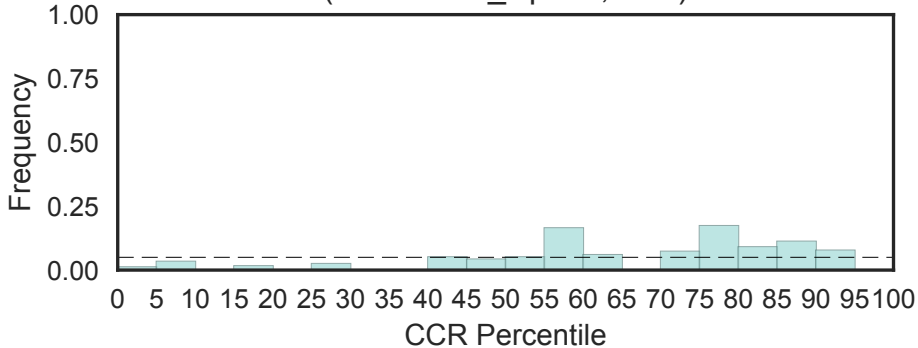

Proteasome subunit  
(Proteasome, N=20)

Fisher's OR: 2.76; Bonferroni p-val: 0.0663

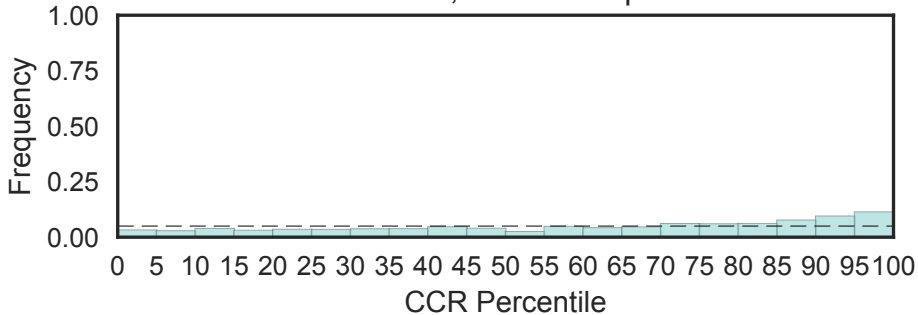

Proteasome subunit A N-terminal signature  
(Proteasome\_A\_N, N=8)

Fisher's OR: 50.5; Bonferroni p-val: 4.97e-06

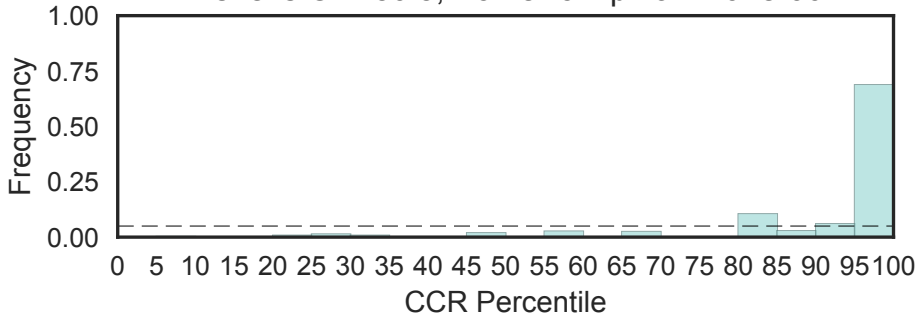

Prothymosin/parathymosin family  
(Prothymosin, N=2)

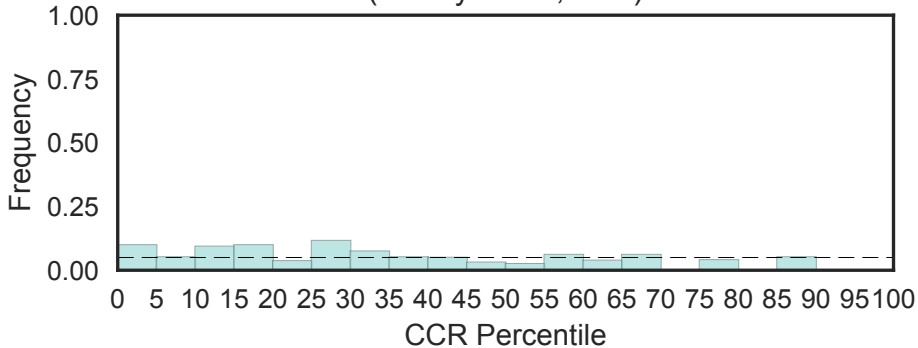



Protocadherin  
(Protocadherin, N=3)  
Fisher's OR: 0.522; Bonferroni p-val: 1

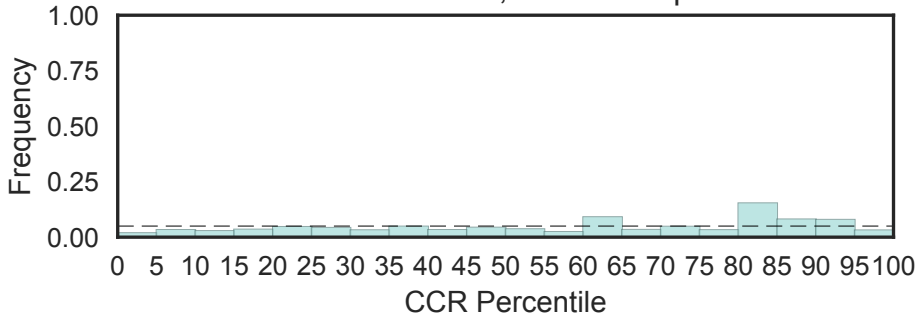

Prp18 domain  
(Prp18, N=2)

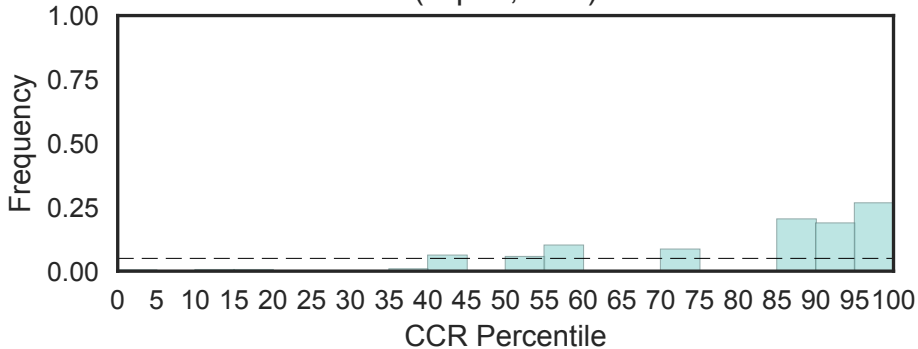

Prp19/Pso4-like  
(Prp19, N=1)

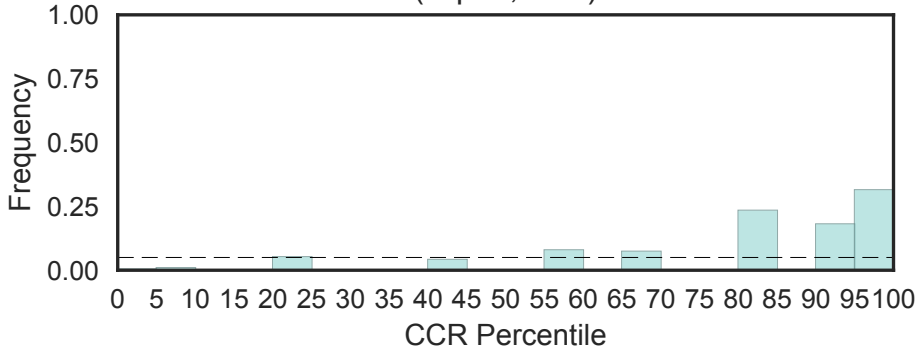

Prp31 C terminal domain  
(Prp31\_C, N=1)

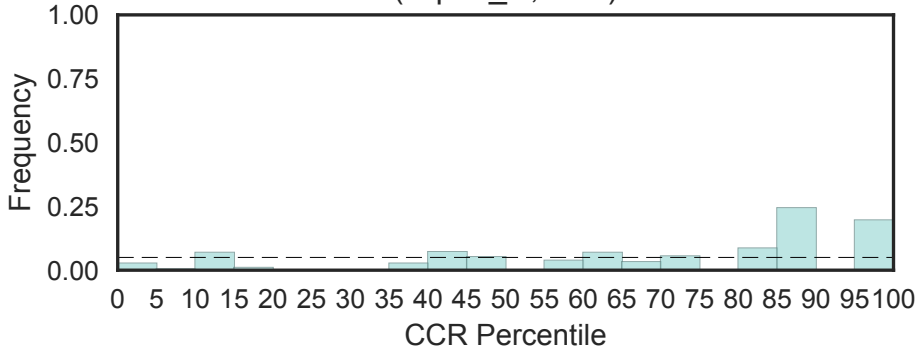

tRNA pseudouridine synthase  
(PseudoU\_synth\_1, N=4)

Fisher's OR: 0; Bonferroni p-val: 1

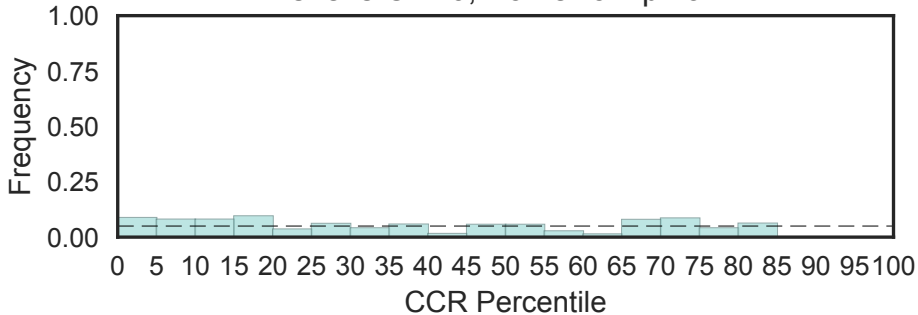

RNA pseudouridylate synthase  
(PseudoU\_synth\_2, N=4)

Fisher's OR: 0; Bonferroni p-val: 1

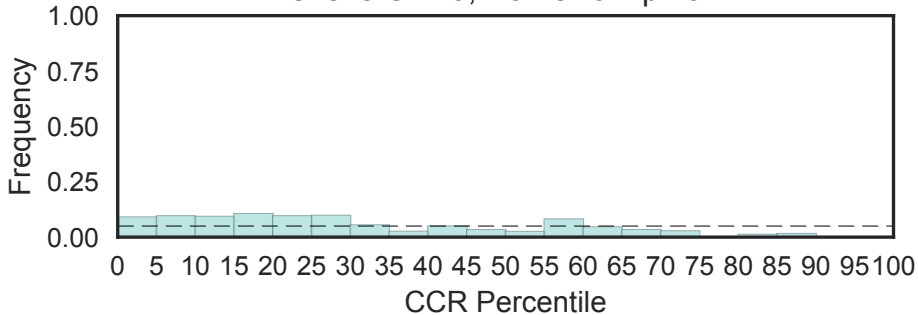

Pterin 4 alpha carbinolamine dehydratase  
(Pterin\_4a, N=2)

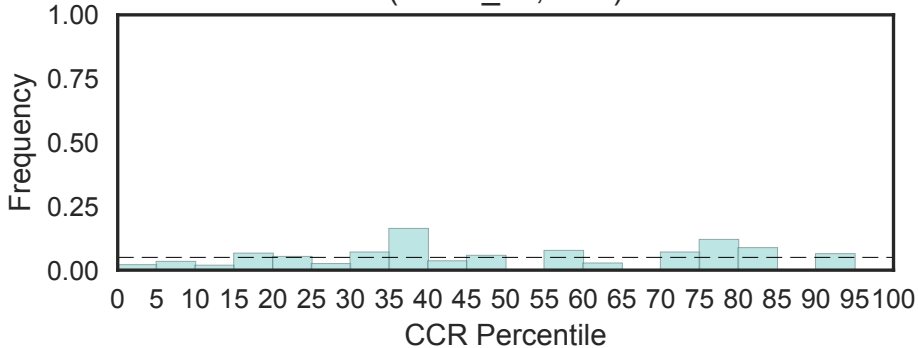

Pterin binding enzyme  
(Pterin\_bind, N=1)

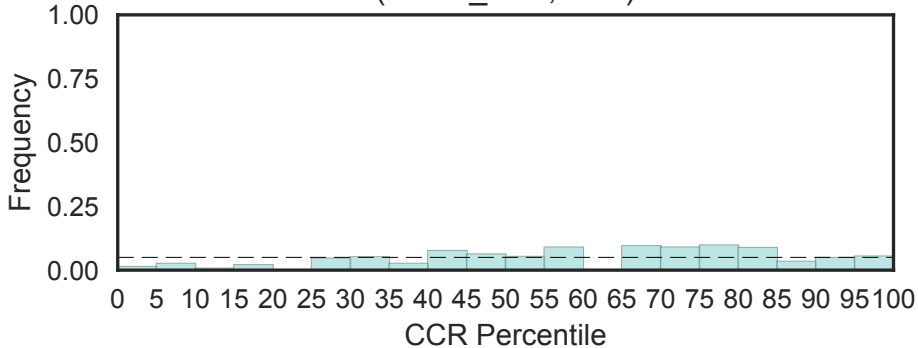



PurA ssDNA and RNA-binding protein  
(PurA, N=3)

Fisher's OR: 8.75; Bonferroni p-val: 0.000874

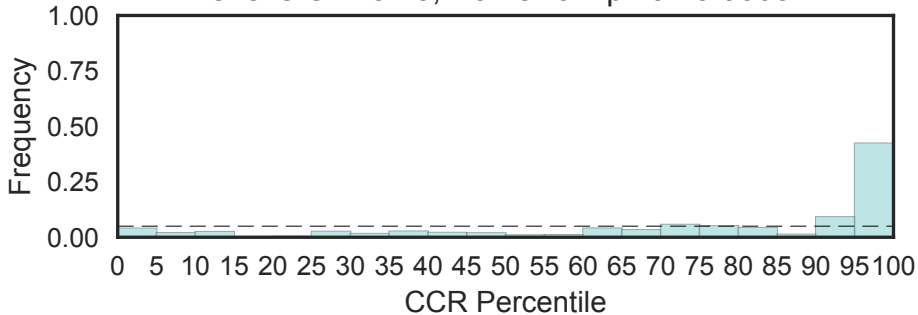

Purple acid Phosphatase, N-terminal domain  
(Pur\_ac\_phosph\_N, N=1)

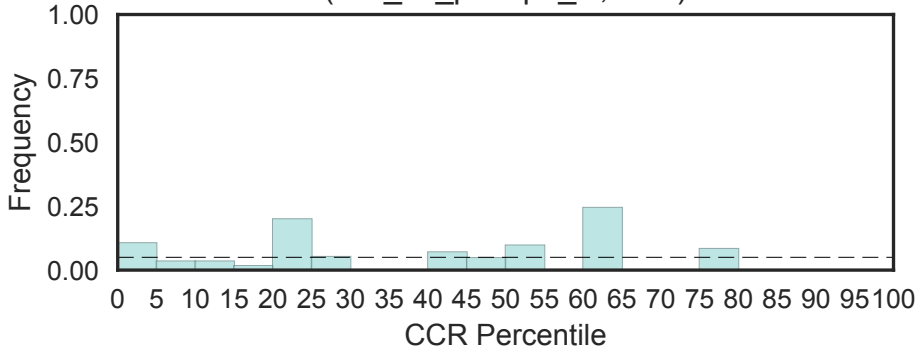

# Putative Phosphatase (Put\_Phosphatase, N=2)

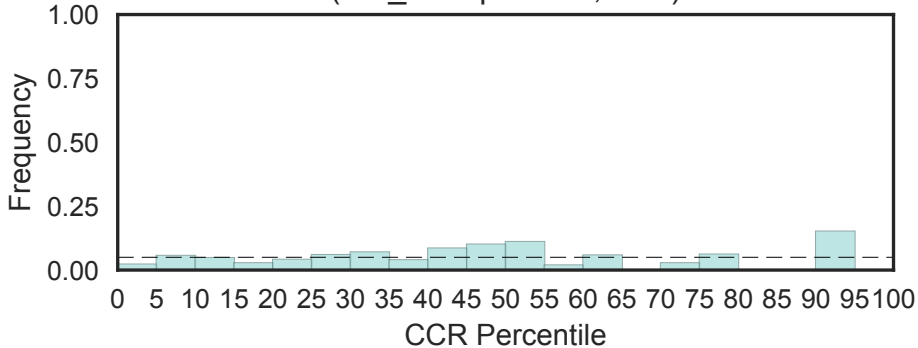

Pyridoxamine 5'-phosphate oxidase  
(Putative\_PNPOx, N=1)

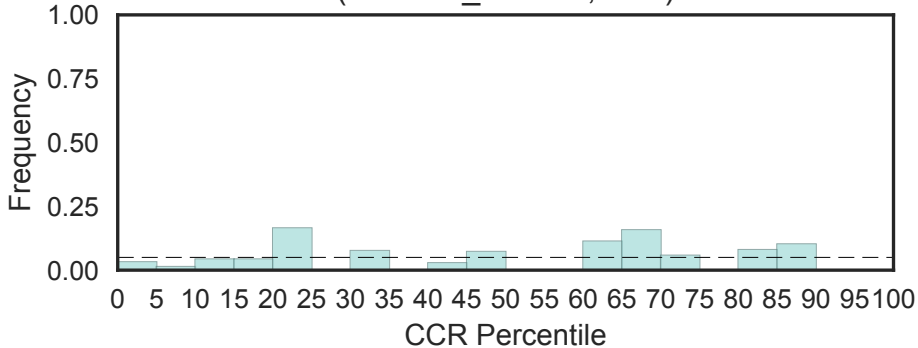

Pyridine nucleotide-disulphide oxidoreductase  
(Pyr\_redox, N=11)

Fisher's OR: 1.22; Bonferroni p-val: 1

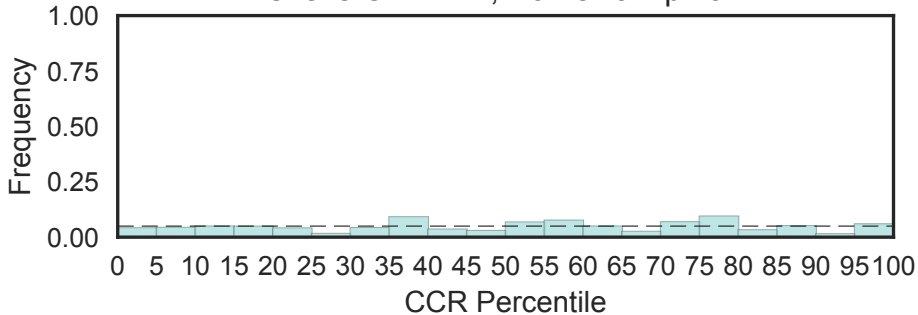

Pyridine nucleotide-disulphide oxidoreductase  
(Pyr\_redox\_2, N=22)

Fisher's OR: 0.386; Bonferroni p-val: 1

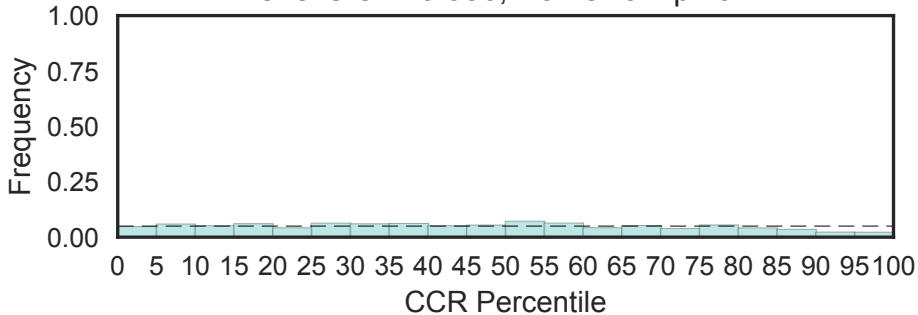

Pyridine nucleotide-disulphide oxidoreductase  
(Pyr\_redox\_3, N=12)

Fisher's OR: 0.348; Bonferroni p-val: 1

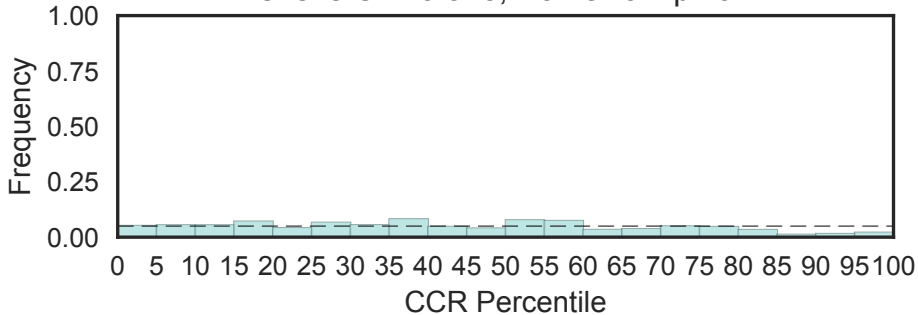

Pyridine nucleotide-disulphide oxidoreductase, dimerisation domain  
(Pyr\_redox\_dim, N=4)

Fisher's OR: 0.721; Bonferroni p-val: 1

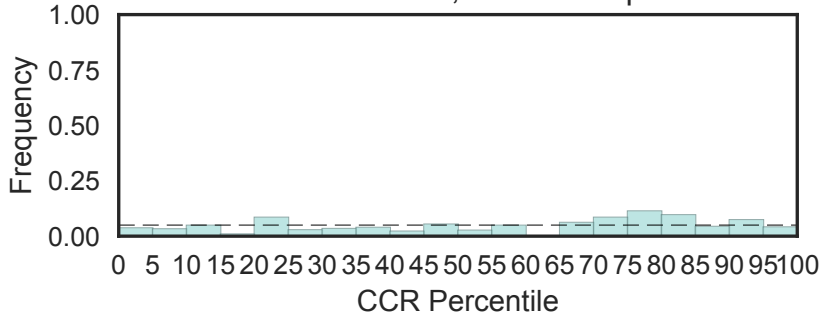



Pyridoxamine 5'-phosphate oxidase  
(Pyrid\_oxidase\_2, N=2)

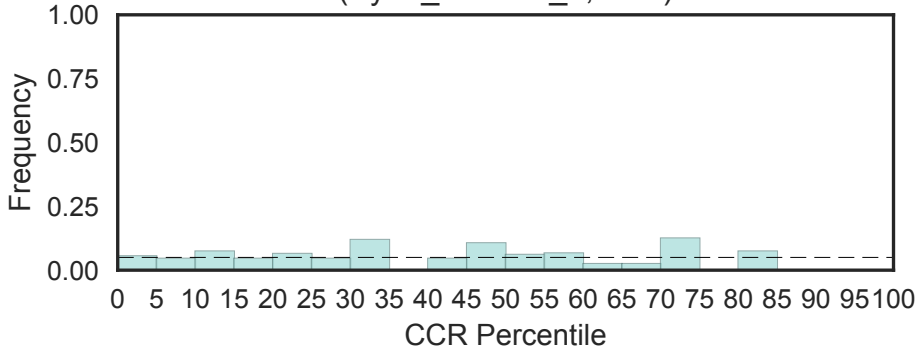

Pyridoxamine 5'-phosphate oxidase  
(Pyridox\_oxase\_2, N=1)

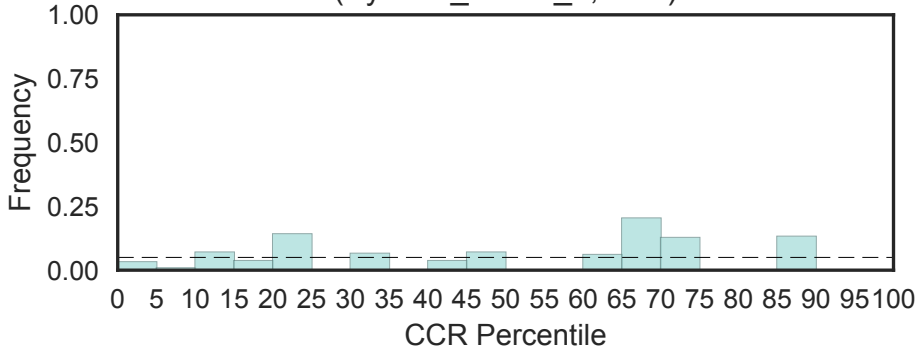

Pyridoxal-dependent decarboxylase conserved domain  
(Pyridoxal\_deC, N=11)

Fisher's OR: 0.465; Bonferroni p-val: 1

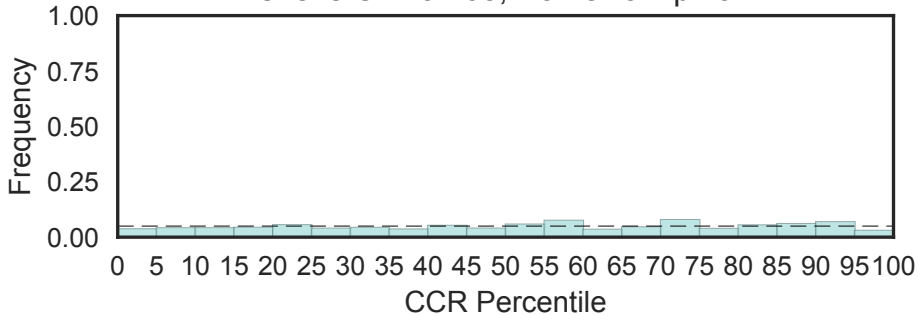

# Inorganic pyrophosphatase (Pyrophosphatase, N=2)

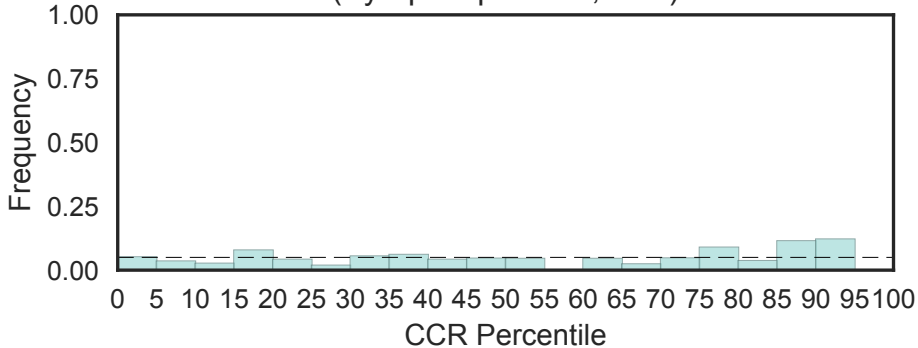

Protein QIL1  
(QIL1, N=1)

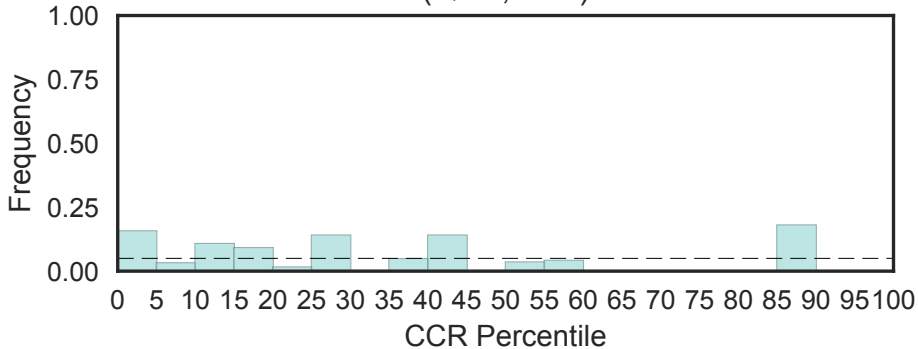

QLQ  
(QLQ, N=2)

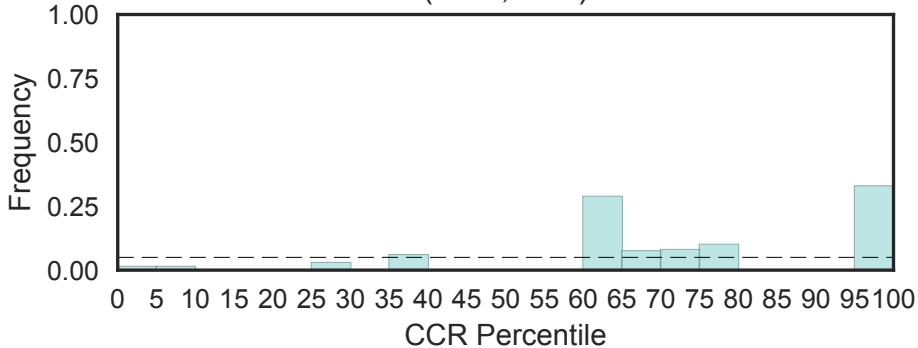

Quinolinate phosphoribosyl transferase, C-terminal domain  
(QRPTase\_C, N=1)

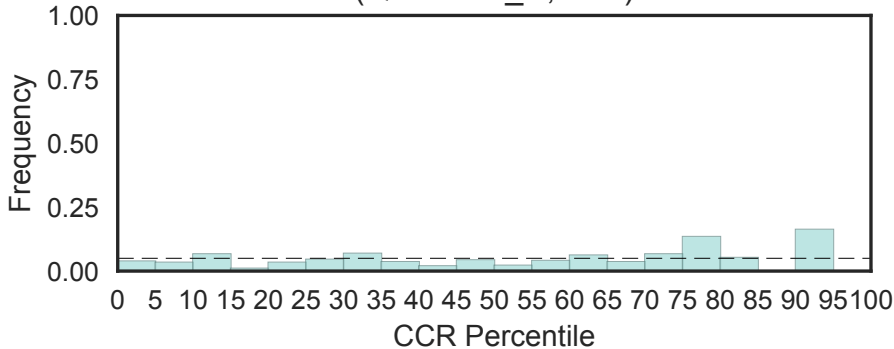

# Quinolinate phosphoribosyl transferase, N-terminal domain (QRPTase\_N, N=1)

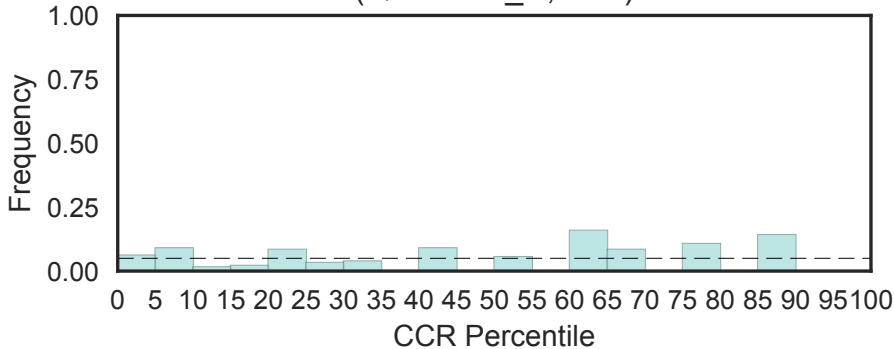



Potential Queuosine, Q, salvage protein family  
(Q\_salvage, N=1)

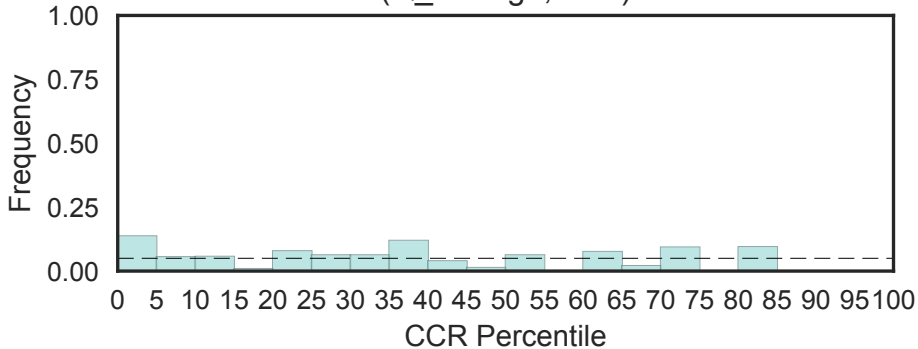

Qua1 domain  
(Qua1, N=3)

Fisher's OR: 2.3; Bonferroni p-val: 1

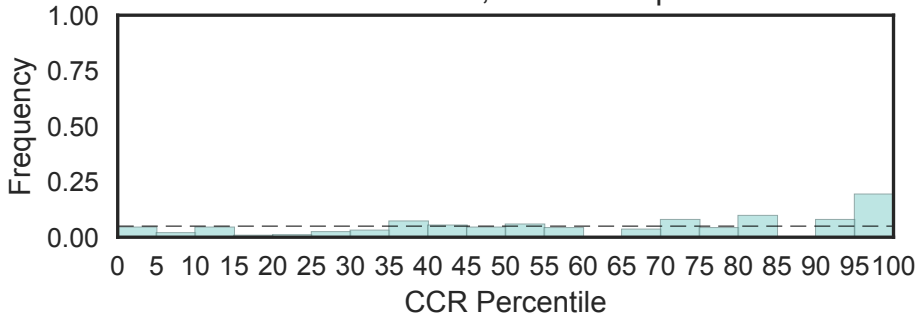

Putative nuclear localisation signal of quaking  
(Quaking\_NLS, N=1)

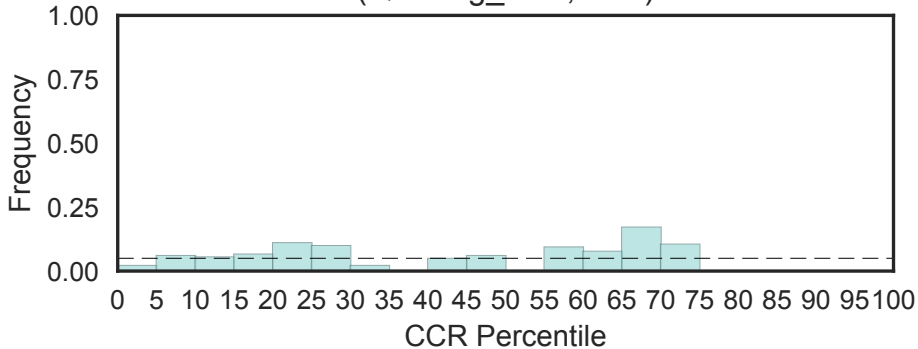

Queuosine biosynthesis protein QueC  
(QueC, N=2)

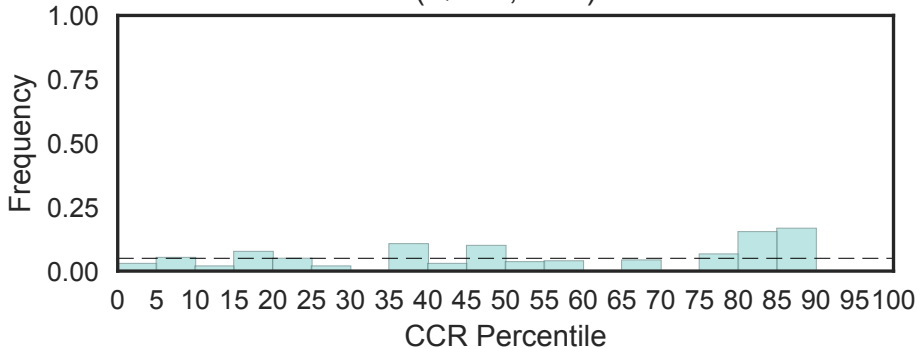

R3H domain  
(R3H, N=9)

Fisher's OR: 2.07; Bonferroni p-val: 1

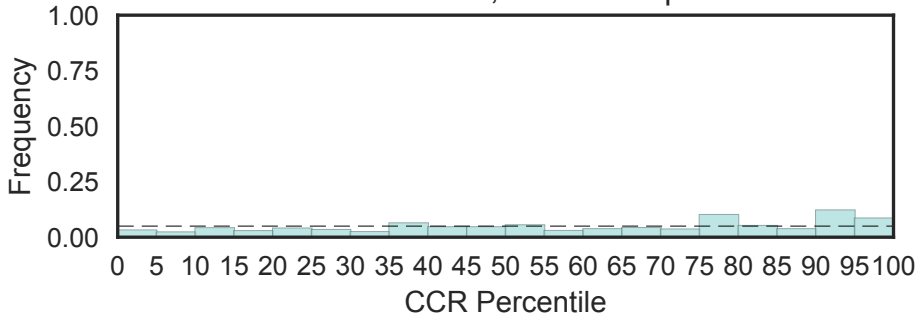

R3H-associated N-terminal domain  
(R3H-assoc, N=1)

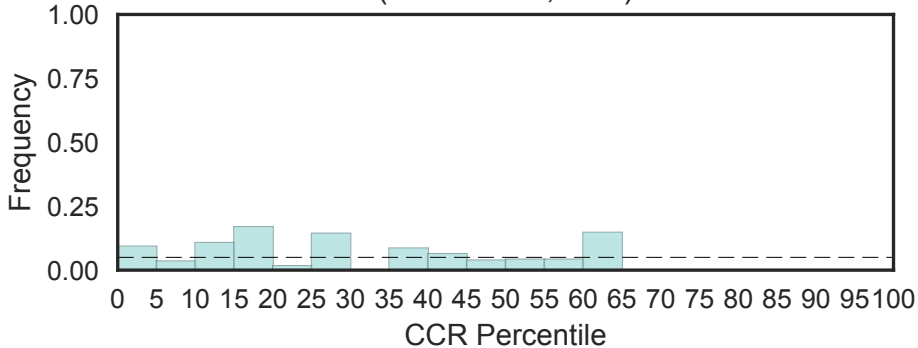

Ras association (RalGDS/AF-6) domain  
(RA, N=37)

Fisher's OR: 0.398; Bonferroni p-val: 1

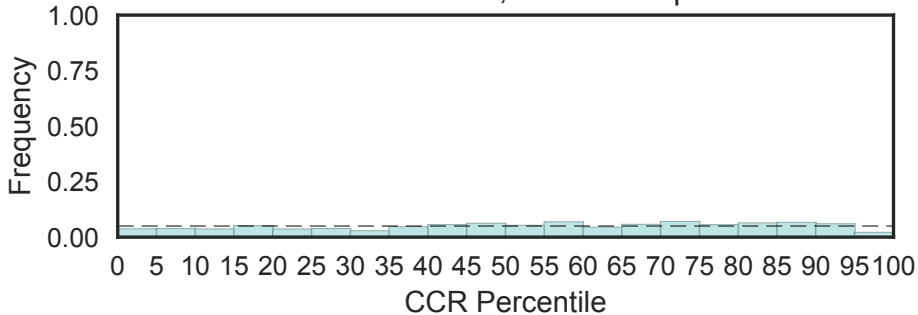

Rab3 GTPase-activating protein regulatory subunit C-terminus  
(RAB3GAP2\_C, N=1)

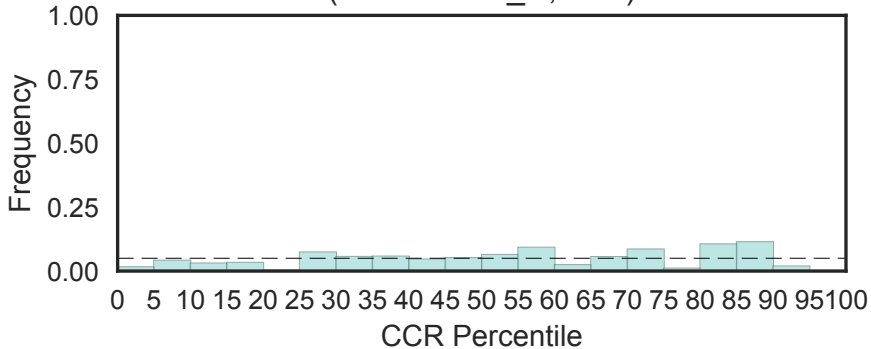



# Rab3 GTPase-activating protein regulatory subunit N-terminus (RAB3GAP2\_N, N=2)

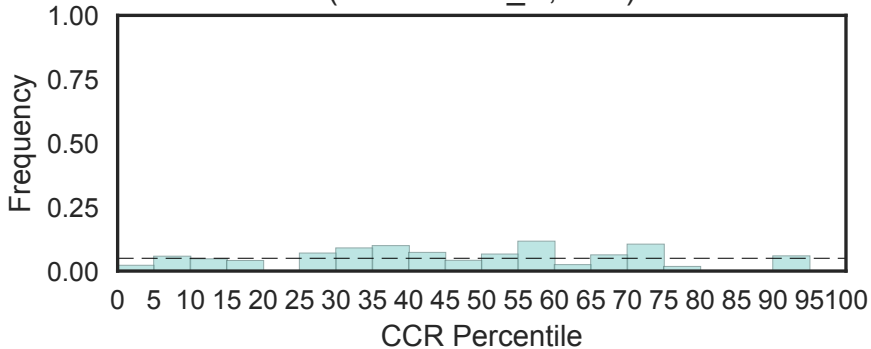

Ribosome-associated complex head domain  
(RAC\_head, N=1)

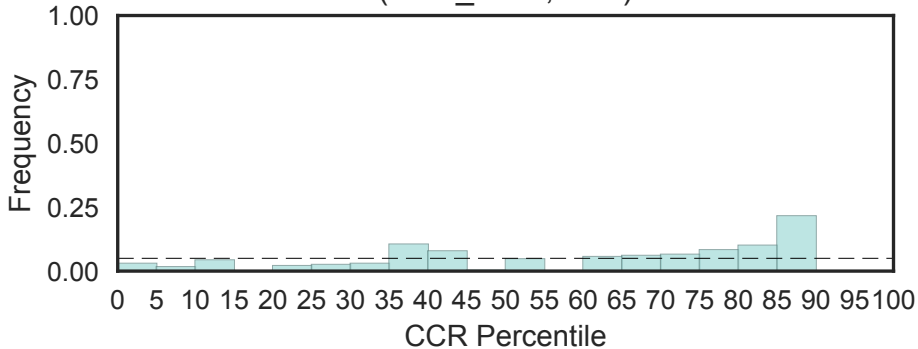

RAD51 interacting motif  
(RAD51\_interact, N=2)

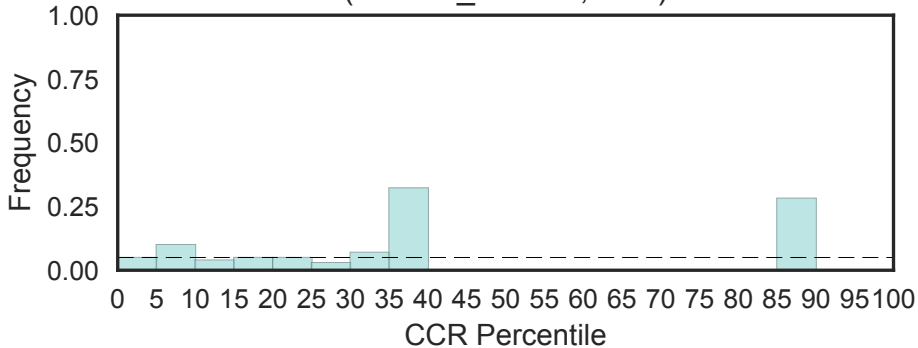

# Recombination-activation protein 1 (RAG1), recombinase (RAG1, N=1)

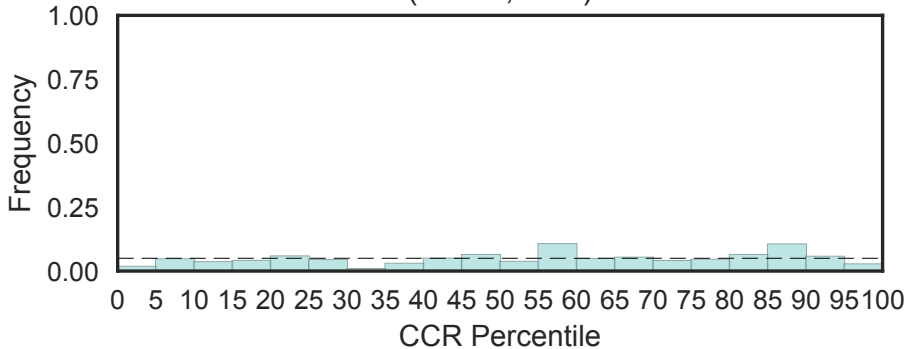

RAG1 importin binding  
(RAG1\_imp\_bd, N=1)

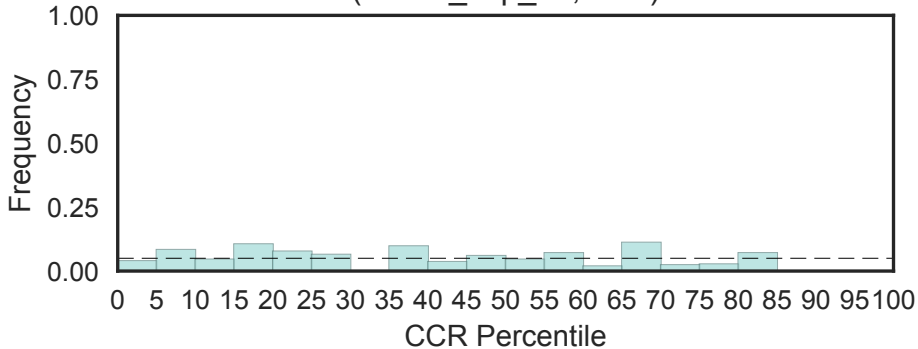

# Recombination activating protein 2 (RAG2, N=1)

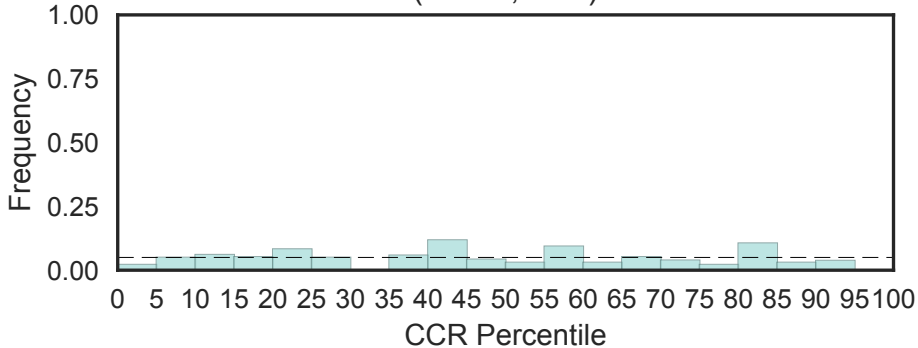

RAG2 PHD domain  
(RAG2\_PHD, N=1)

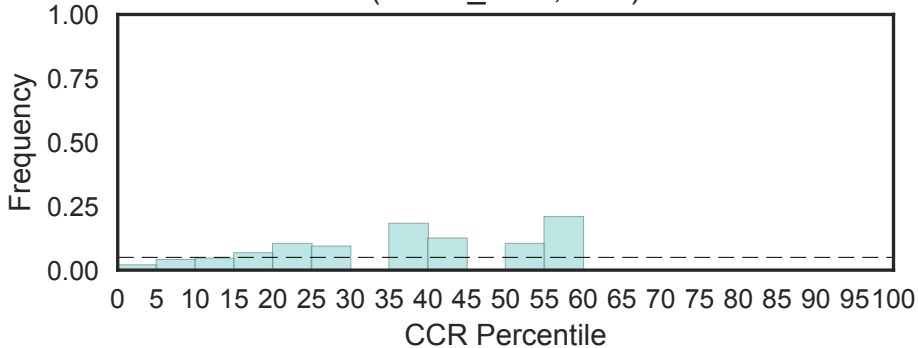

Retinoic acid induced 16-like protein  
(RAI16-like, N=4)  
Fisher's OR: 0.217; Bonferroni p-val: 1

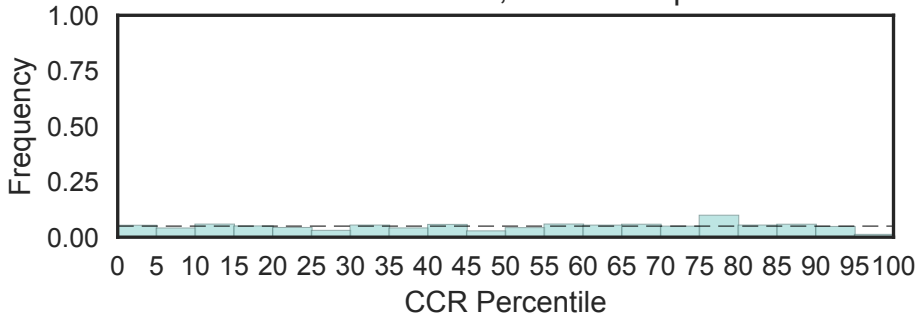



mRNA cap methylation, RNMT-activating mini protein  
(RAM, N=2)

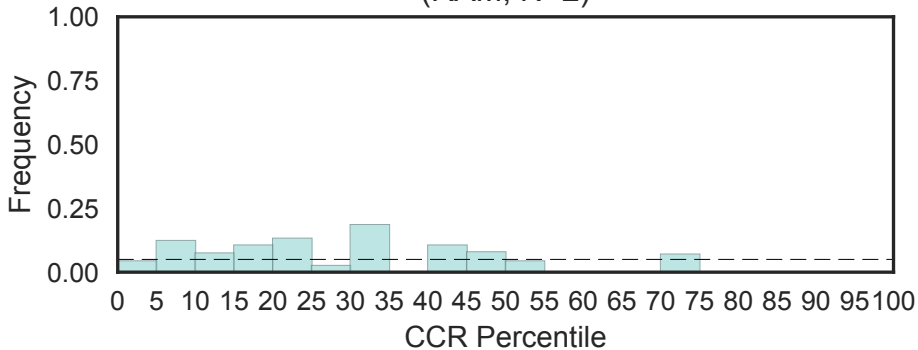

Receptor activity modifying family  
(RAMP, N=3)

Fisher's OR: 0; Bonferroni p-val: 1

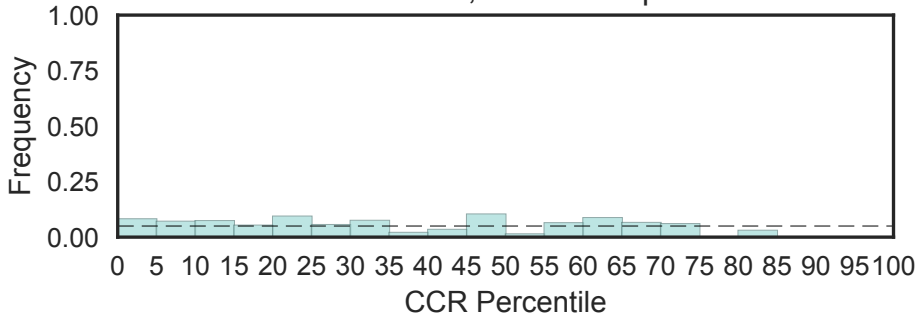

# Ribosome associated membrane protein RAMP4 (RAMP4, N=2)

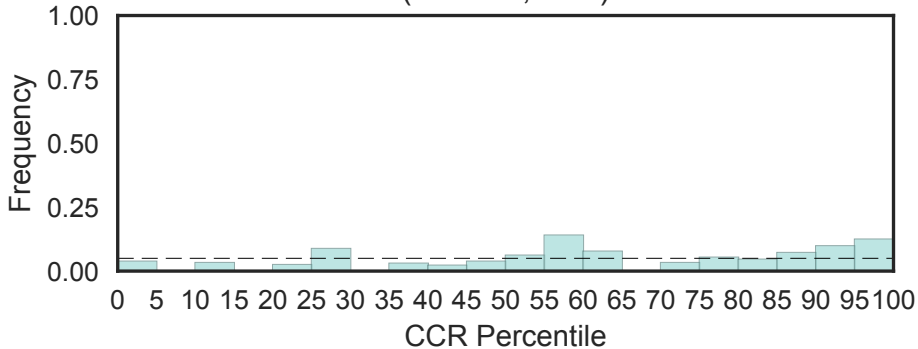

RAP domain  
(RAP, N=6)

Fisher's OR: 0.948; Bonferroni p-val: 1

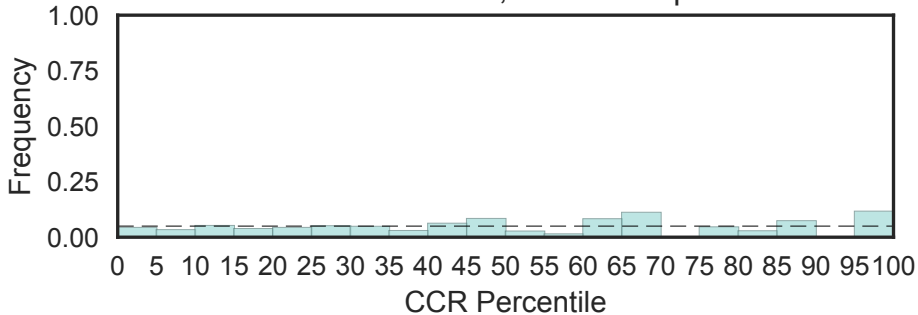

RAWUL domain RING finger- and WD40-associated ubiquitin-like  
(RAWUL, N=8)

Fisher's OR: 10.4; Bonferroni p-val: 1

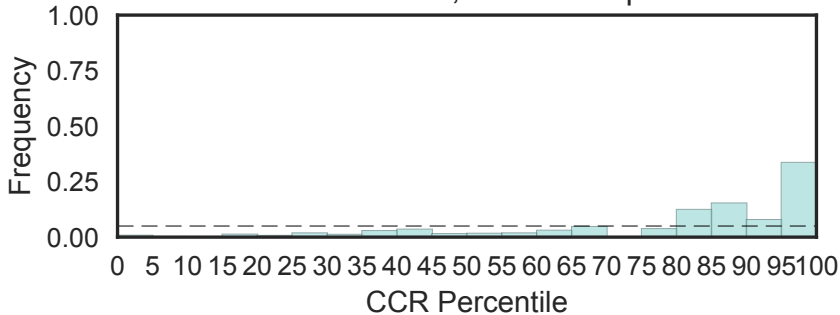

RBB1NT (NUC162) domain  
(RBB1NT, N=2)

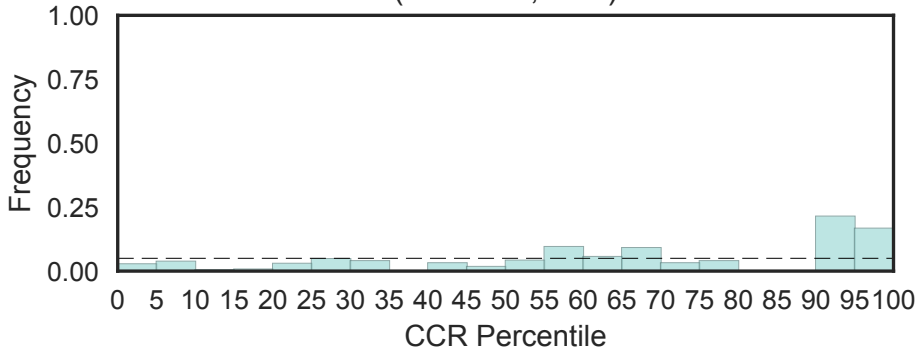

Raf-like Ras-binding domain  
(RBD, N=7)

Fisher's OR: 1.94; Bonferroni p-val: 1

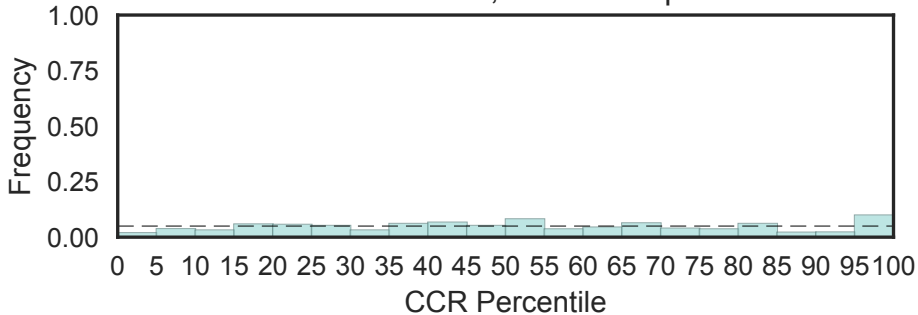

FIP domain  
(RBD-FIP, N=6)

Fisher's OR: 1.06; Bonferroni p-val: 1

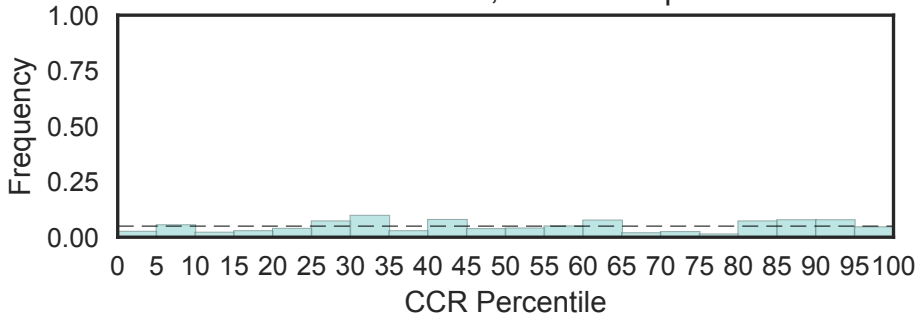



# Ribosome-binding factor A (RBFA, N=1)

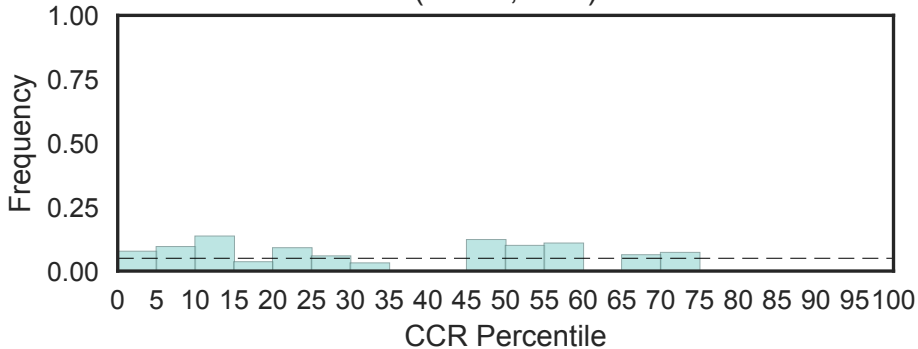

RBM1CTR (NUC064) family  
(RBM1CTR, N=2)

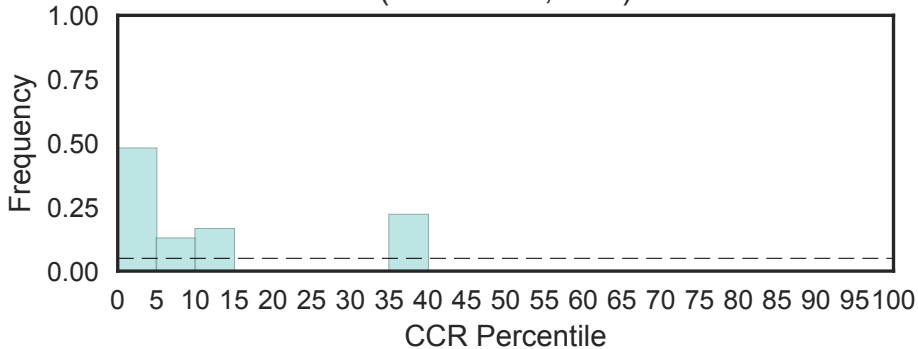

linker between RRM2 and RRM3 domains in RBM39 protein  
(RBM39linker, N=2)

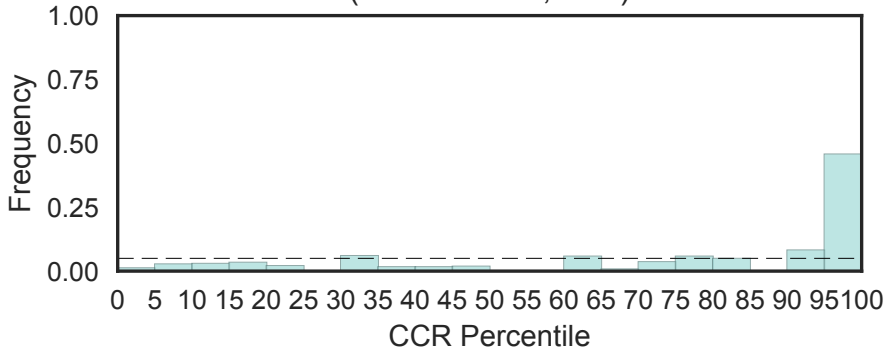

Retinol binding protein receptor  
(RBP\_receptor, N=4)

Fisher's OR: 0; Bonferroni p-val: 1

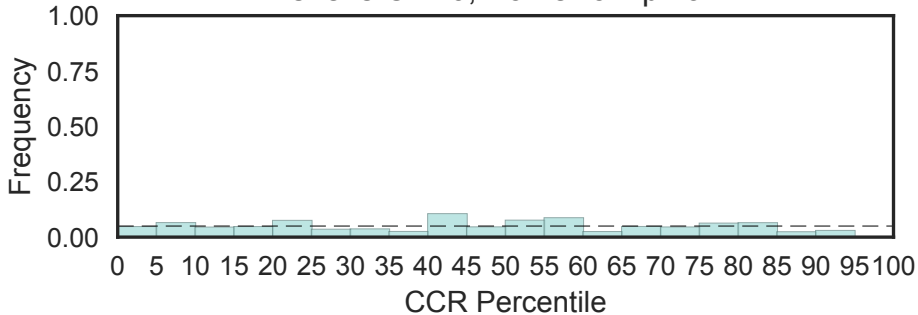

# RNA binding Region (RBR, N=2)

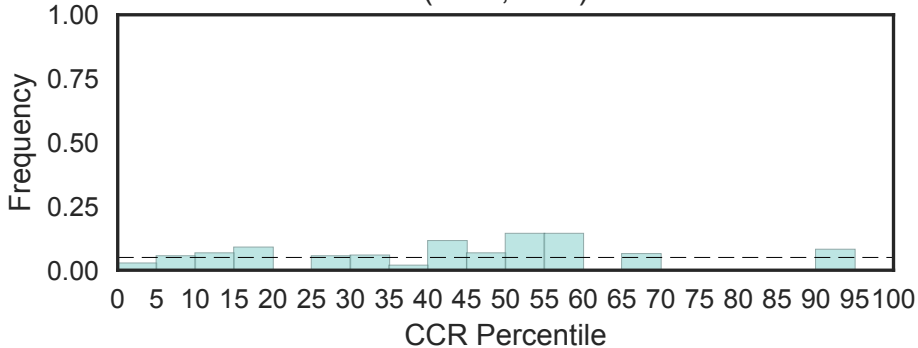

Retinoblastoma-associated protein A domain  
(RB\_A, N=4)

Fisher's OR: 0.684; Bonferroni p-val: 1

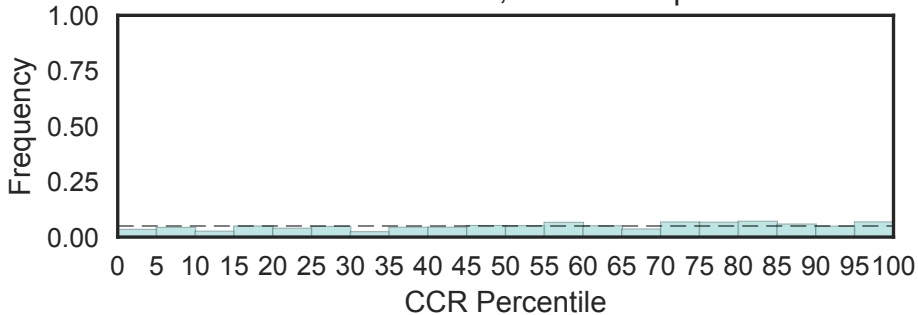

Retinoblastoma-associated protein B domain  
(RB\_B, N=3)

Fisher's OR: 2.46; Bonferroni p-val: 1

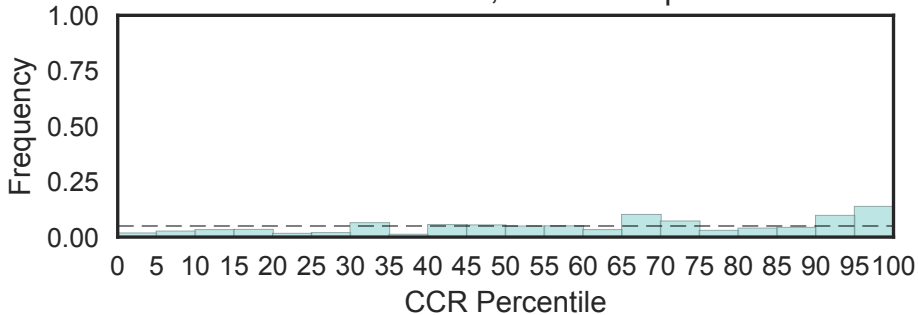

Regulator of chromosome condensation (RCC1) repeat  
(RCC1, N=101)

Fisher's OR: 1.62; Bonferroni p-val: 1

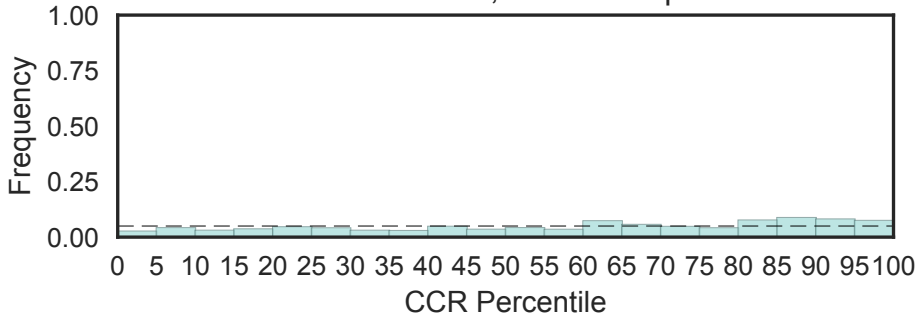



Regulator of chromosome condensation (RCC1) repeat  
(RCC1\_2, N=59)

Fisher's OR: 2.75; Bonferroni p-val: 1

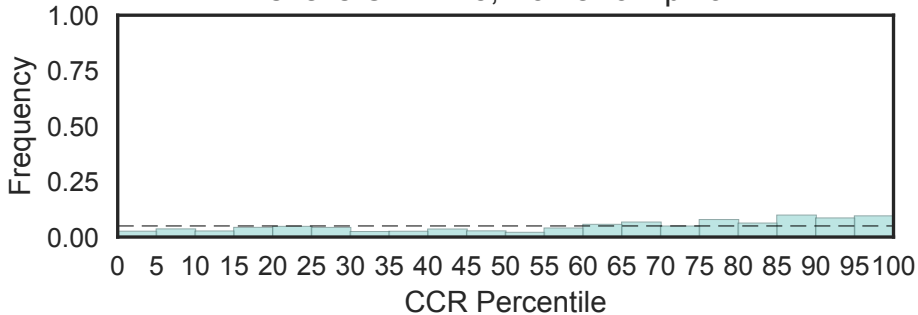

# Renal cancer differentiation gene 1 protein (RCDG1, N=1)

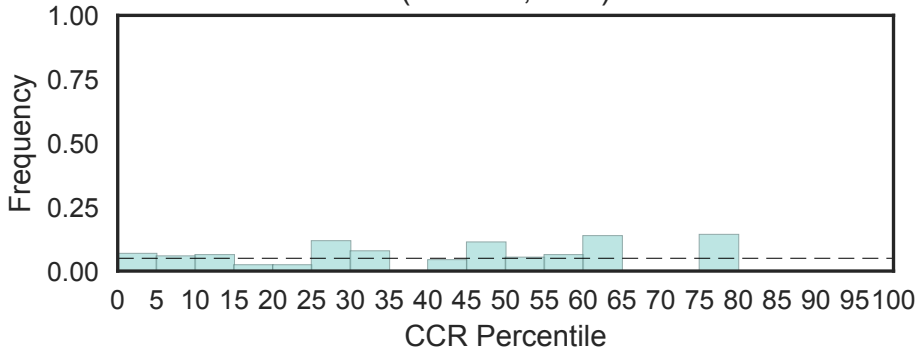

RCSD region  
(RCSD, N=1)

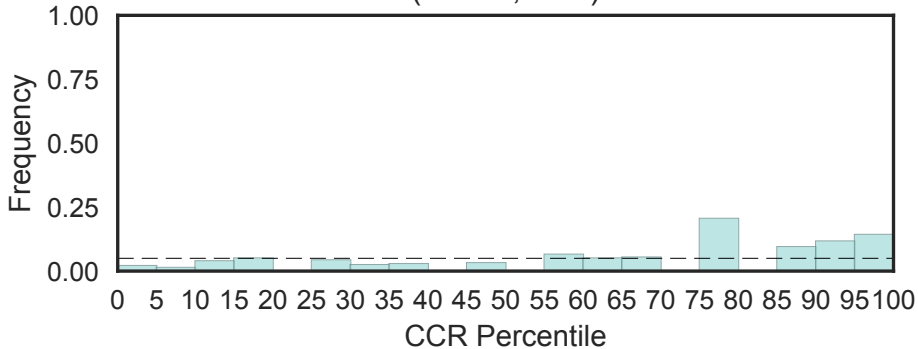

RD3 protein  
(RD3, N=2)

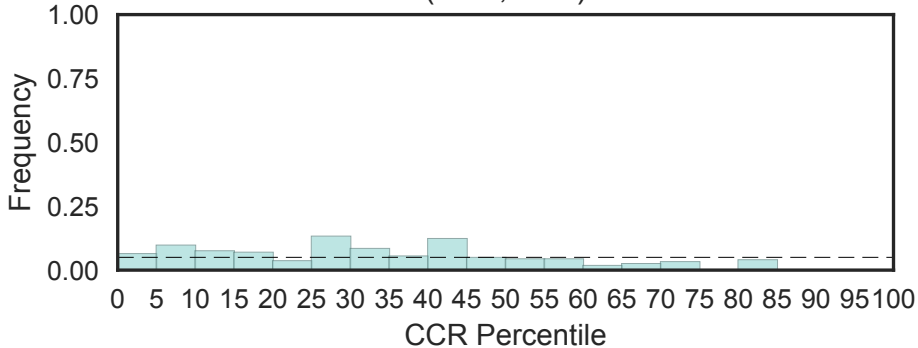

RDD family  
(RDD, N=1)

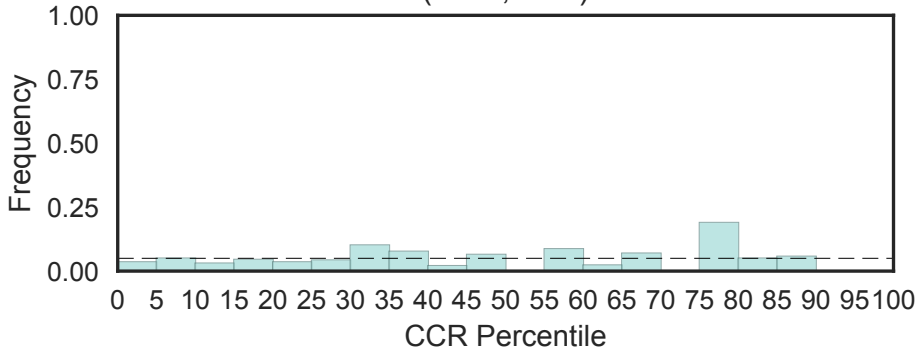

Meiotic recombination protein REC114-like  
(REC114-like, N=1)

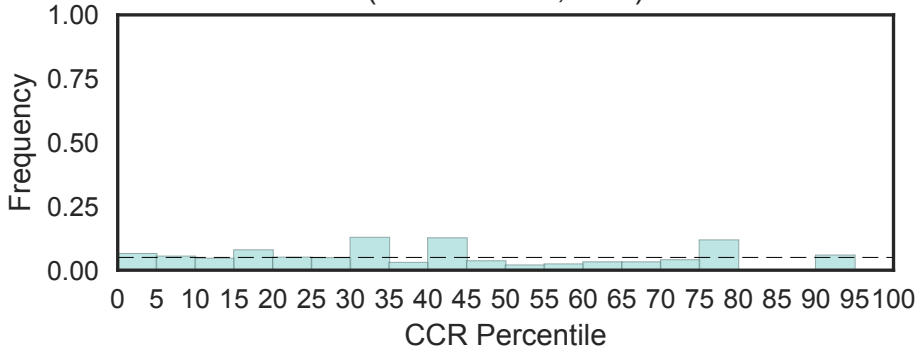

RED-like protein C-terminal region  
(RED\_C, N=1)

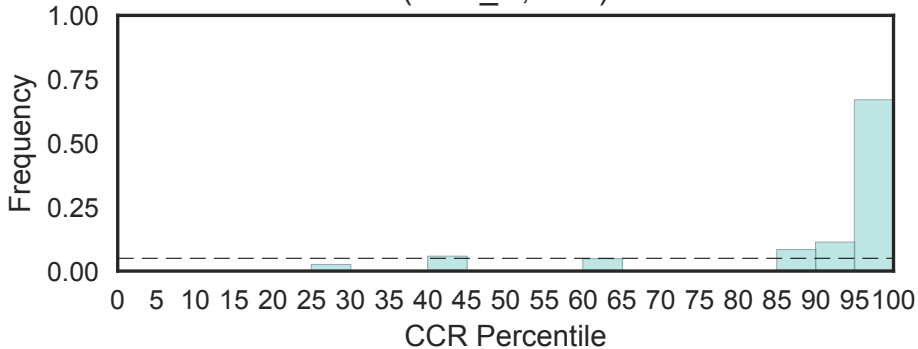

RED-like protein N-terminal region  
(RED\_N, N=1)

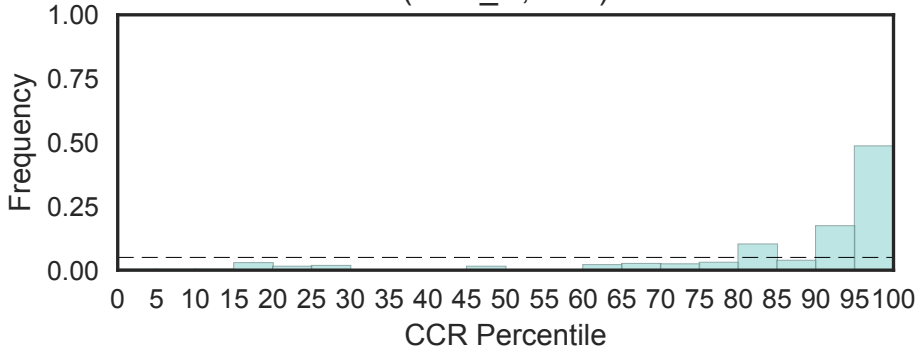



REJ domain  
(REJ, N=5)

Fisher's OR: 0.157; Bonferroni p-val: 1

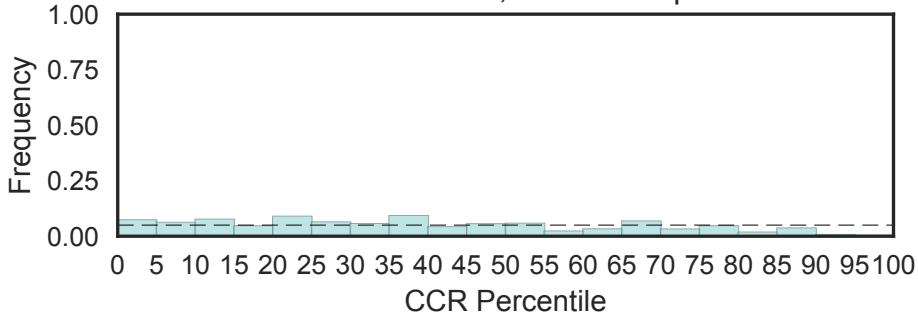

Tumour necrosis factor receptor superfamily member 19  
(REL<sub>T</sub>, N=3)

Fisher's OR: 0; Bonferroni p-val: 1

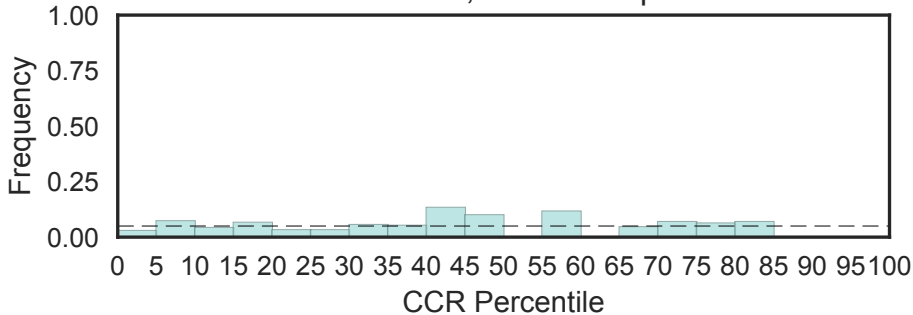

Replication protein A OB domain  
(REPA\_OB\_2, N=1)

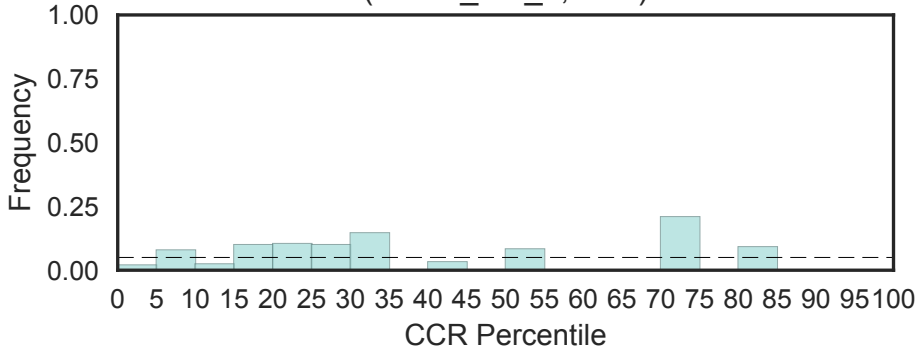

RESP18 domain  
(RESP18, N=3)

Fisher's OR: 0; Bonferroni p-val: 1

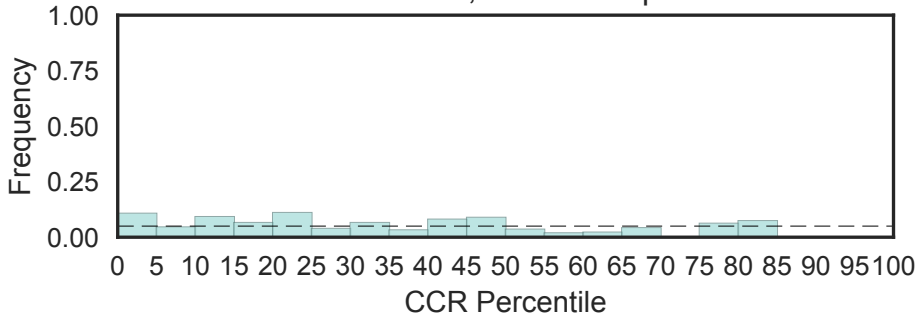

DNA repair protein REV1 C-terminal domain  
(REV1\_C, N=1)

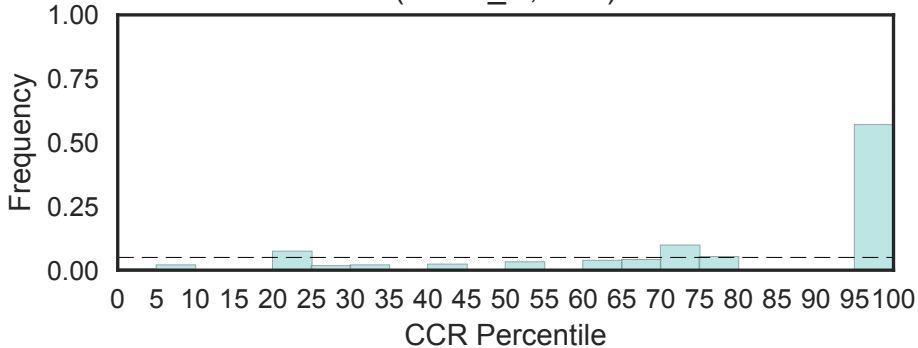

RF-1 domain  
(RF-1, N=4)

Fisher's OR: 0; Bonferroni p-val: 1

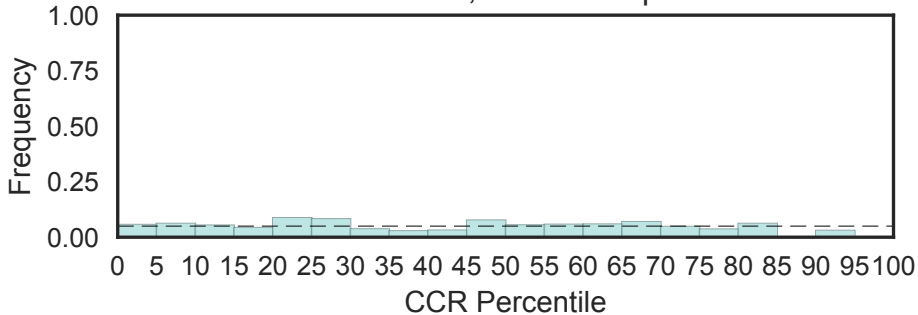

Replication factor RFC1 C terminal domain  
(RFC1, N=1)

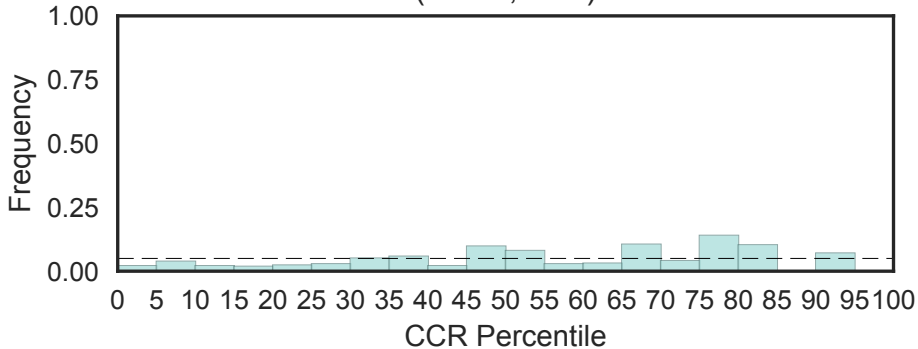

RFX1 transcription activation region  
(RFX1\_trans\_act, N=3)  
Fisher's OR: 1.41; Bonferroni p-val: 1

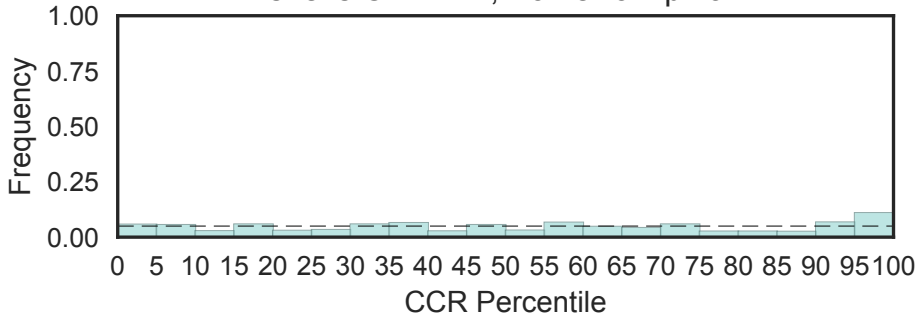



RFX5 DNA-binding domain  
(RFX5\_DNA\_bdg, N=1)

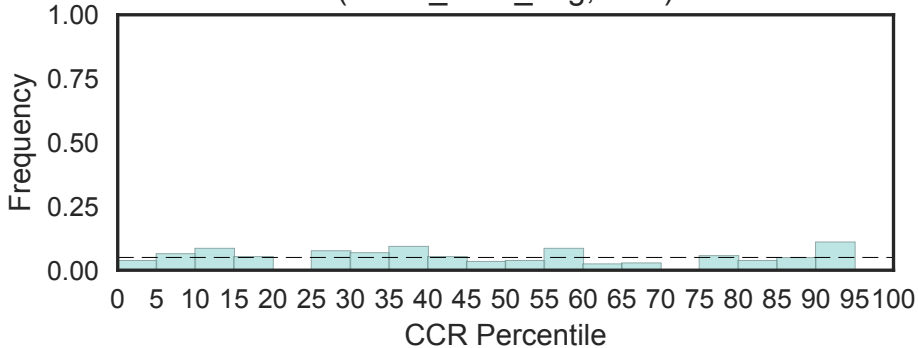

Regulatory factor X-associated C-terminal binding domain  
(RFXA\_RFXANK\_bdg, N=1)

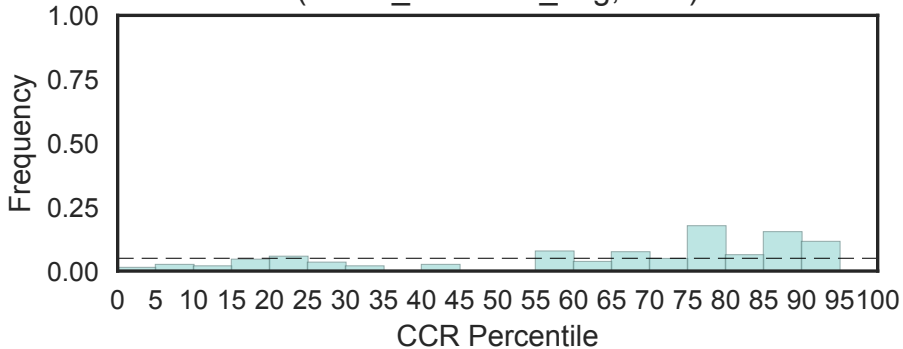

RFX DNA-binding domain  
(RFX\_DNA\_binding, N=8)

Fisher's OR: 5.53; Bonferroni p-val: 0.373

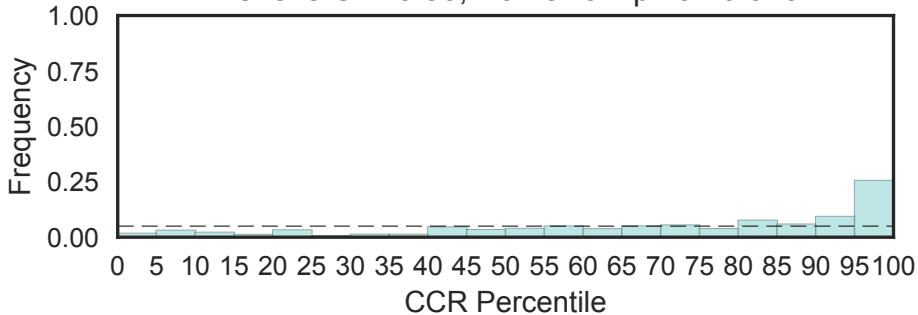

Orexigenic neuropeptide Qrfp/P518  
(RFamide\_26RFa, N=1)

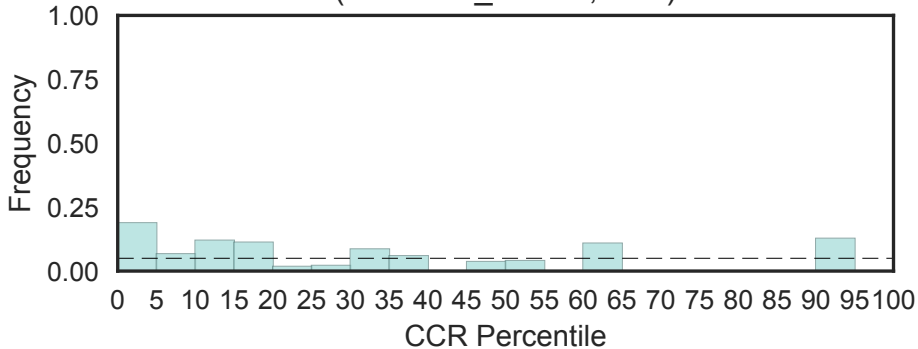

Response gene to complement 32 protein family  
(RGCC, N=1)

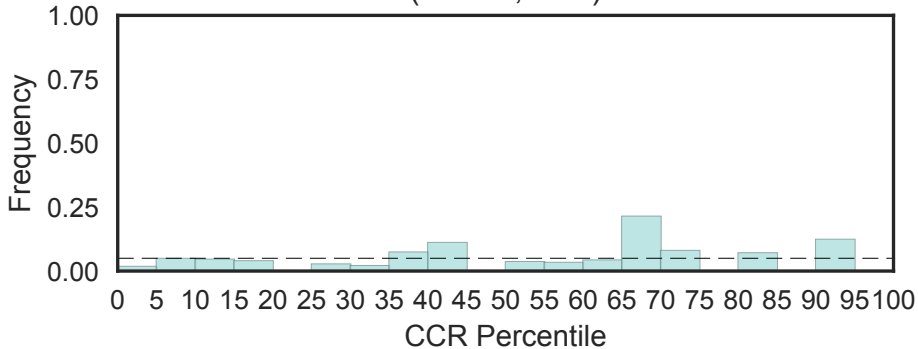

Repulsive guidance molecule (RGM) C-terminus  
(RGM\_C, N=3)

Fisher's OR: 0; Bonferroni p-val: 1

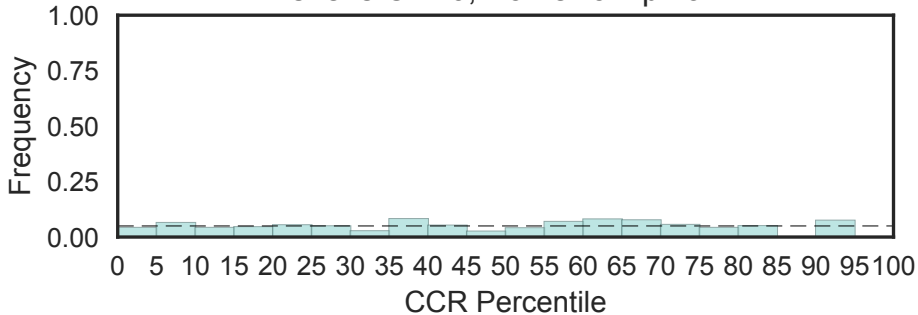

Repulsive guidance molecule (RGM) N-terminus  
(RGM\_N, N=3)

Fisher's OR: 0; Bonferroni p-val: 1

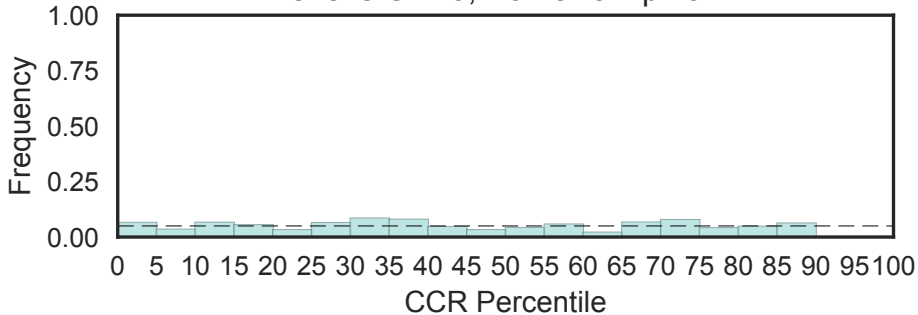

Regulator of G protein signaling domain  
(RGS, N=39)

Fisher's OR: 0.61; Bonferroni p-val: 1

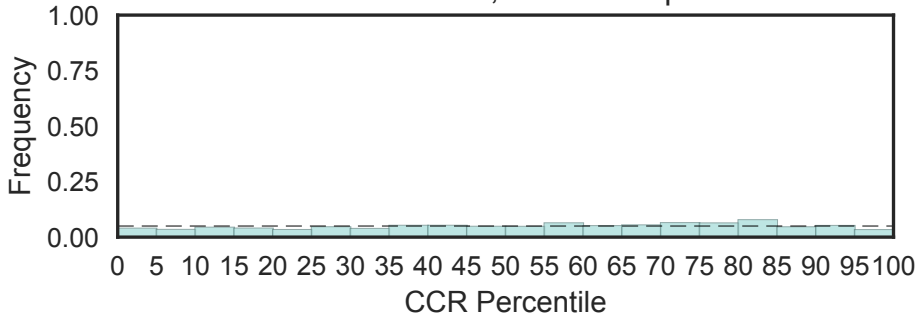



Regulator of G protein signalling-like domain  
(RGS-like, N=3)

Fisher's OR: 0.597; Bonferroni p-val: 1

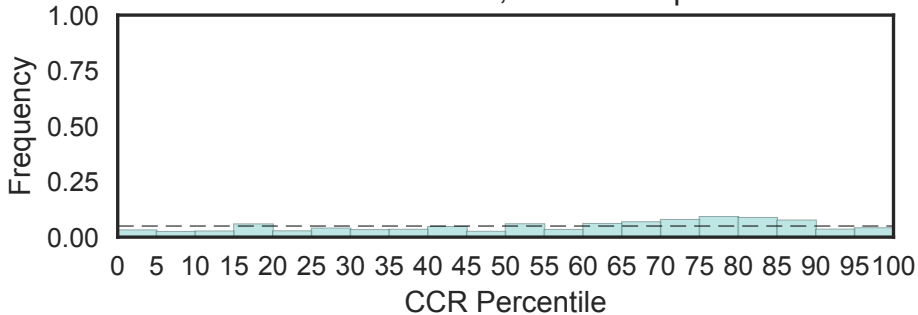

Unstructured region of RGS12  
(RGS12\_us1, N=1)

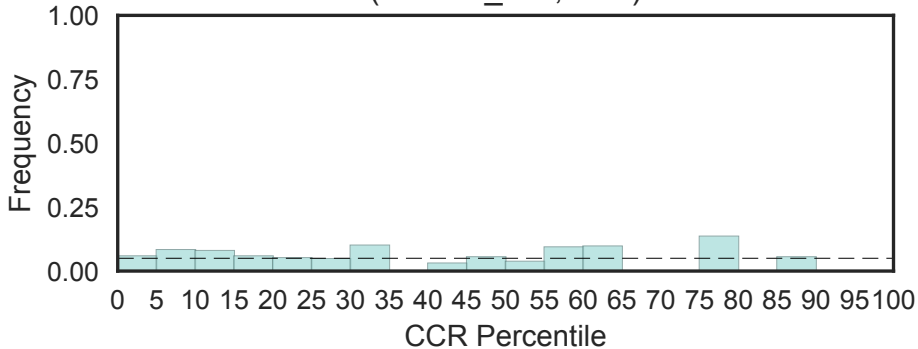

Unstructured region between RBD and GoLoco  
(RGS12\_us2, N=1)

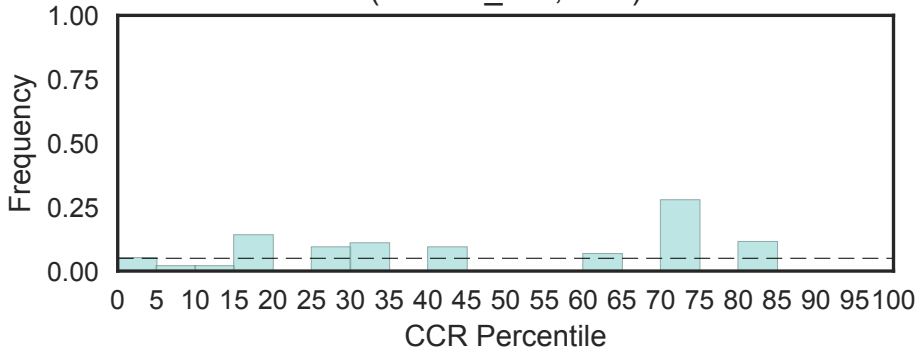

C-terminal unstructured region of RGS12  
(RGS12\_usC, N=1)

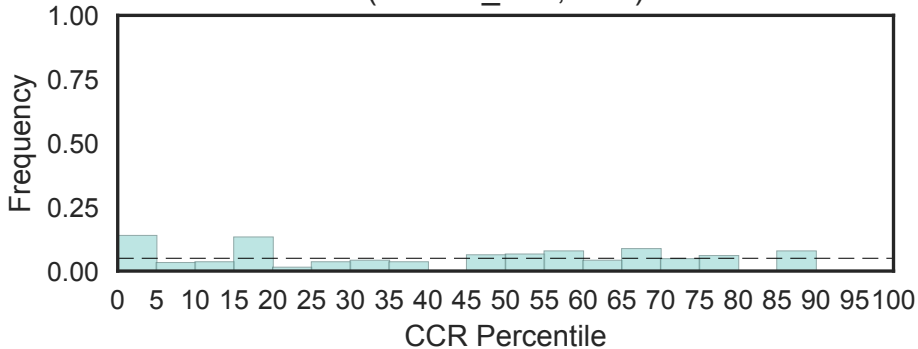

Rel homology DNA-binding domain  
(RHD\_DNA\_bind, N=10)

Fisher's OR: 4.53; Bonferroni p-val: 0.00084

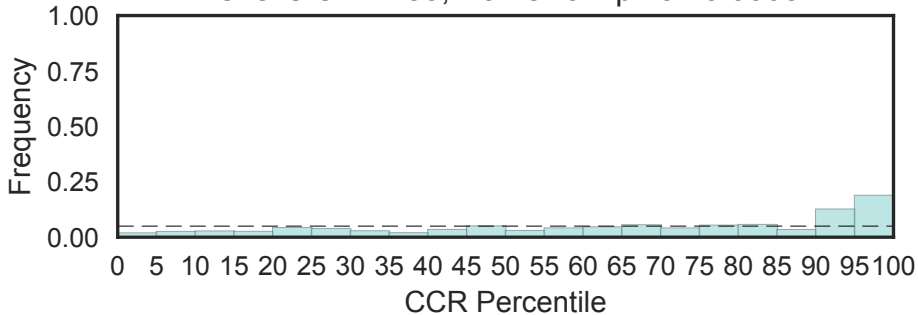

Rel homology dimerisation domain  
(RHD\_dimer, N=10)

Fisher's OR: 5.85; Bonferroni p-val: 0.00203

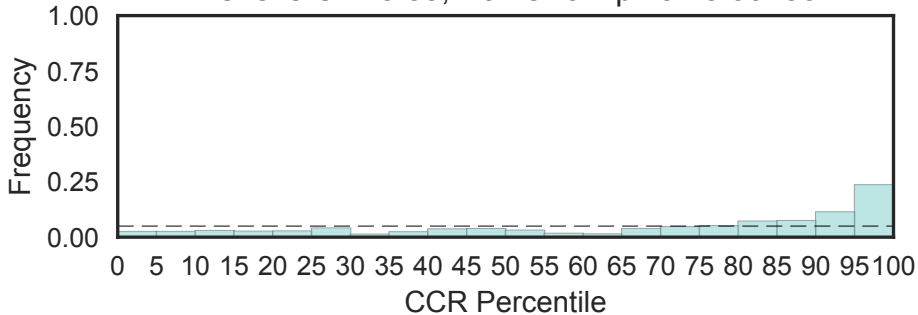

RIP homotypic interaction motif  
(RHIM, N=6)

Fisher's OR: 0.948; Bonferroni p-val: 1

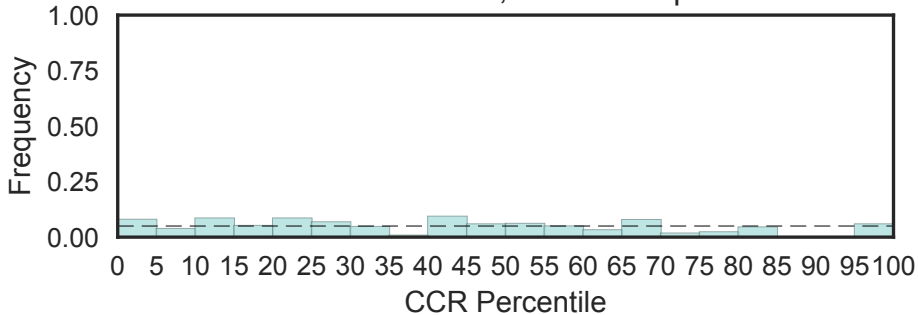

RAD9, RAD1, HUS1-interacting nuclear orphan protein  
(RHINO, N=1)

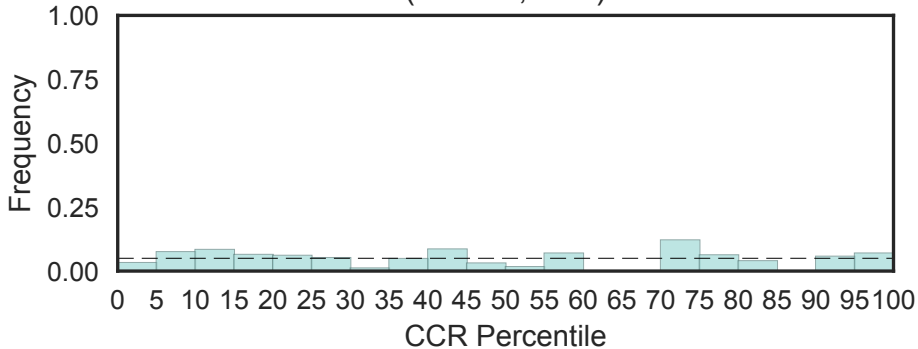



RIB43A  
(RIB43A, N=1)

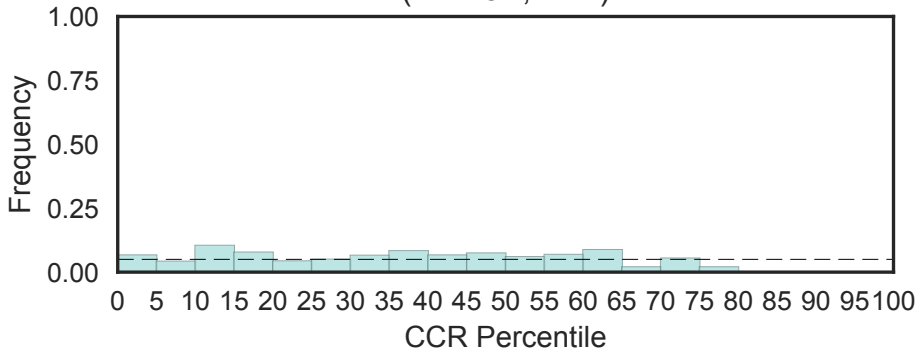

# 40S ribosome biogenesis protein Tsr1 and BMS1 C-terminal (RIBIOP\_C, N=2)

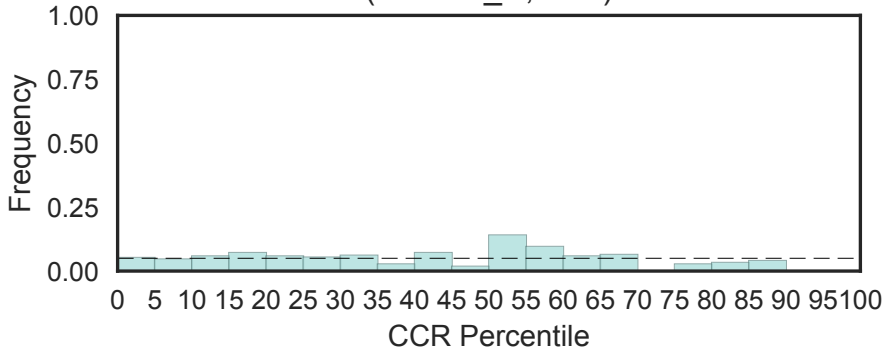

# RIC1 (RIC1, N=1)

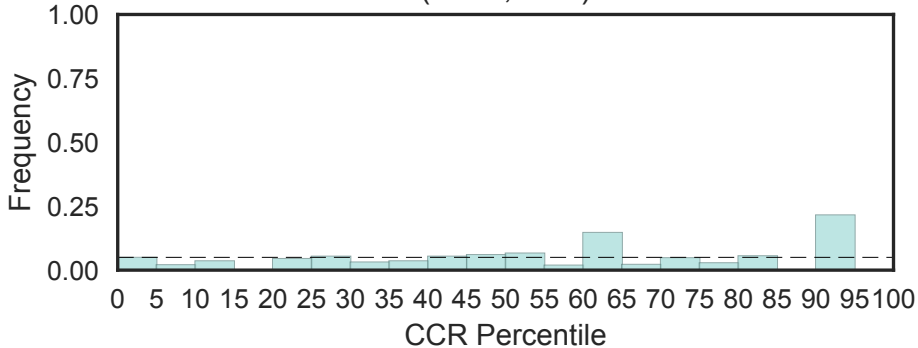

# Resistance to inhibitors of cholinesterase homologue 3 (RIC3, N=1)

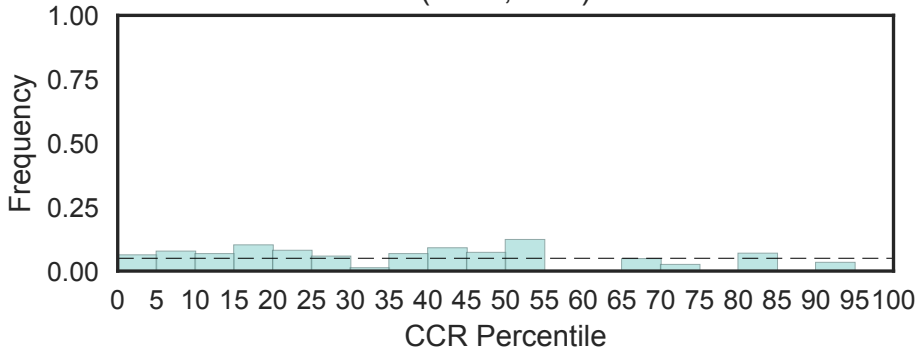

# Rapamycin-insensitive companion of mTOR, middle domain (RICTOR\_M, N=1)

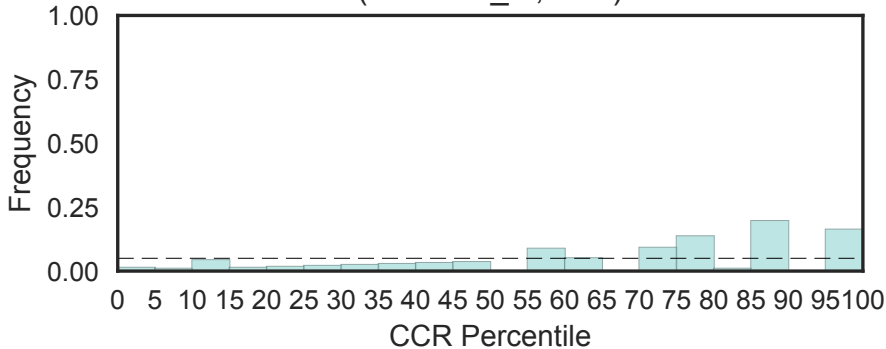

# Rapamycin-insensitive companion of mTOR, N-term (RICTOR\_N, N=1)

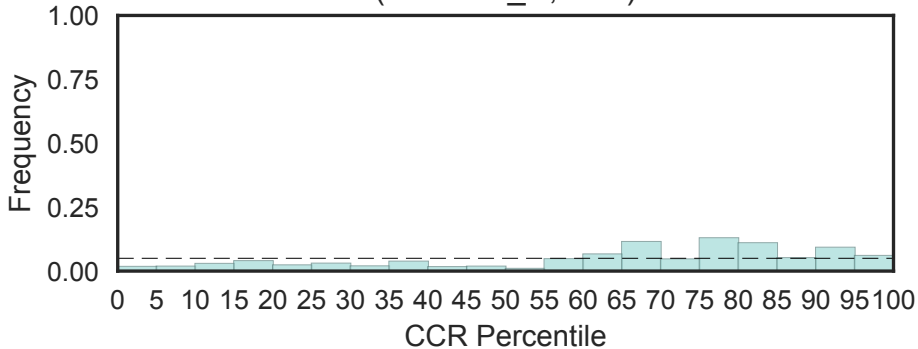

Rapamycin-insensitive companion of mTOR, domain 5  
(RICTOR\_V, N=1)

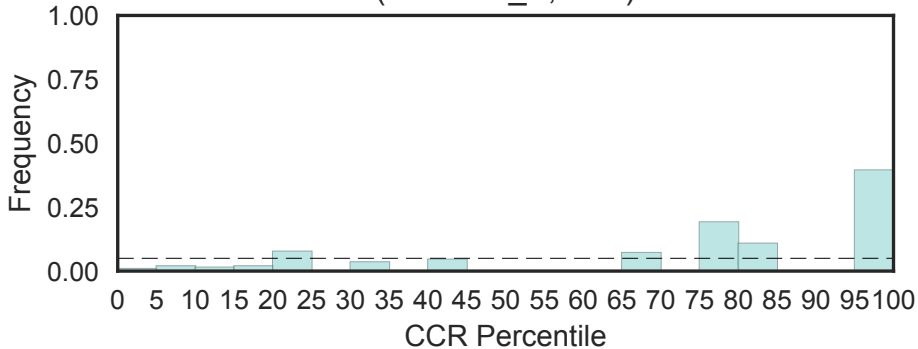

# Rapamycin-insensitive companion of mTOR, phosphorylation-site (RICTOR\_phospho, N=1)

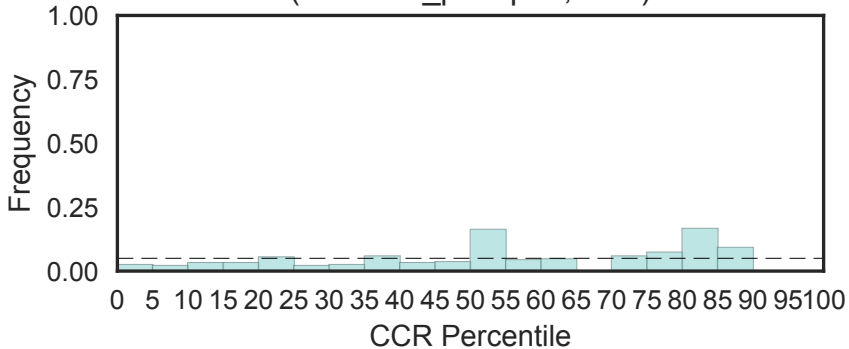



C-terminal domain of RIG-I  
(RIG-I\_C-RD, N=3)

Fisher's OR: 0; Bonferroni p-val: 1

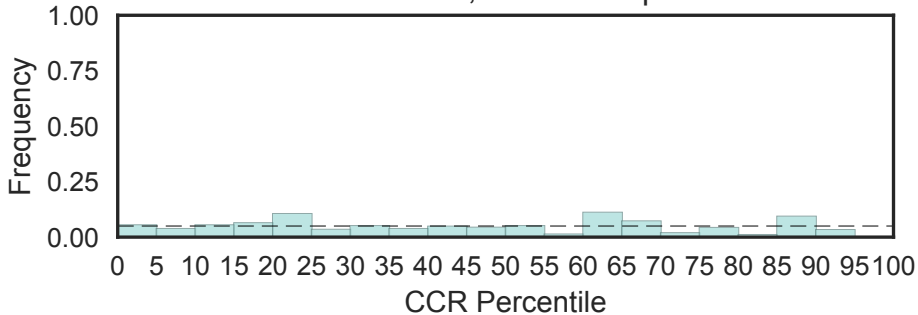

RyR and IP3R Homology associated  
(RIH\_assoc, N=6)

Fisher's OR: 2.74; Bonferroni p-val: 1

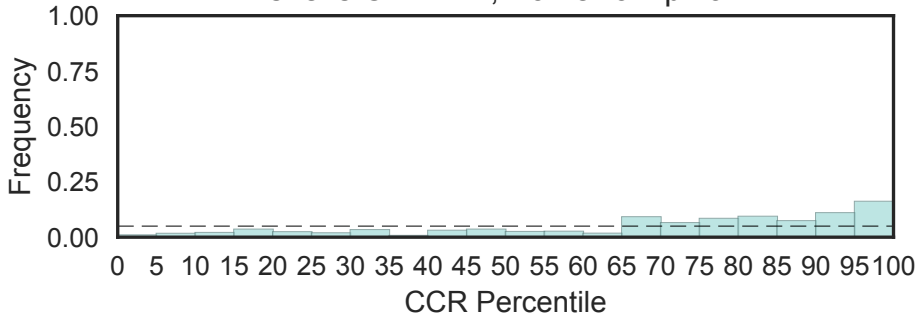

RII binding domain  
(RII\_binding\_1, N=4)

Fisher's OR: 3.38; Bonferroni p-val: 1

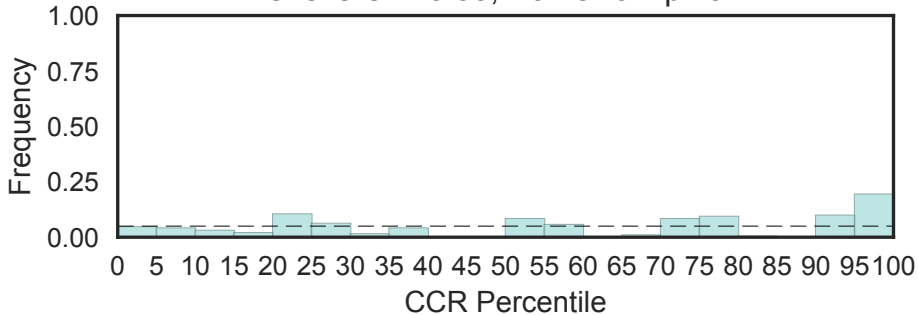

Regulatory subunit of type II PKA R-subunit  
(R11a, N=7)

Fisher's OR: 0; Bonferroni p-val: 1

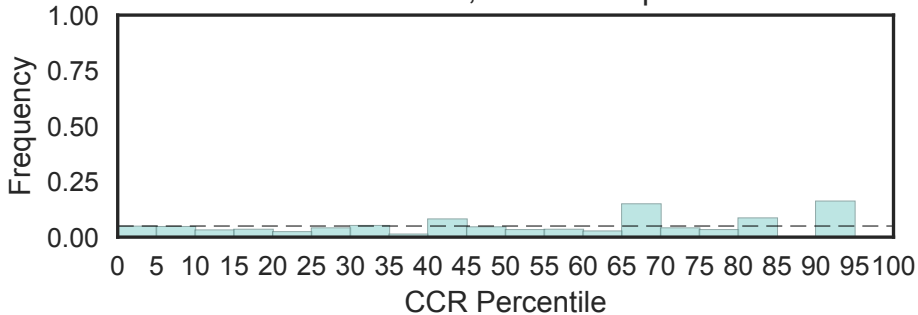

Rab interacting lysosomal protein  
(RILP, N=3)

Fisher's OR: 1.32; Bonferroni p-val: 1

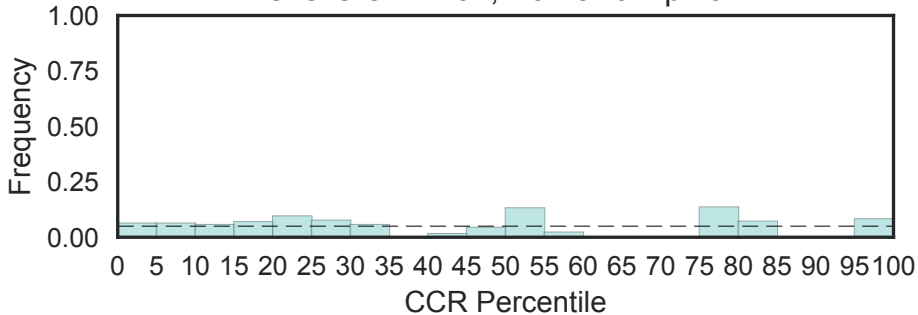

RING-variant domain  
(RINGv, N=11)

Fisher's OR: 1.8; Bonferroni p-val: 1

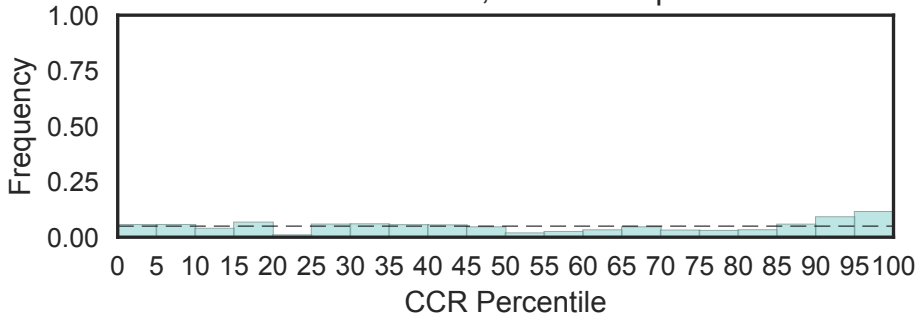

RINT-1 / TIP-1 family  
(RINT1\_TIP1, N=2)

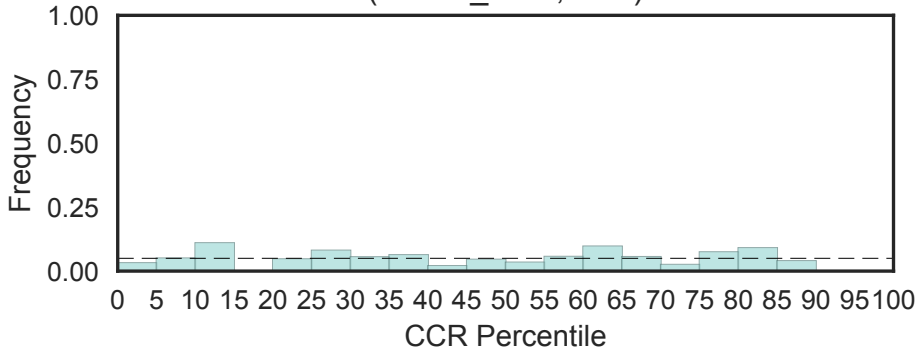

RIO1 family  
(RIO1, N=17)

Fisher's OR: 1.49; Bonferroni p-val: 1

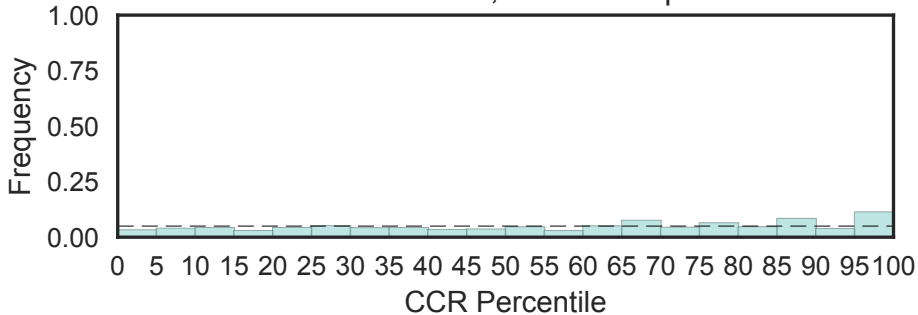



# RBPJ-interacting and tubulin associated protein (RITA, N=1)

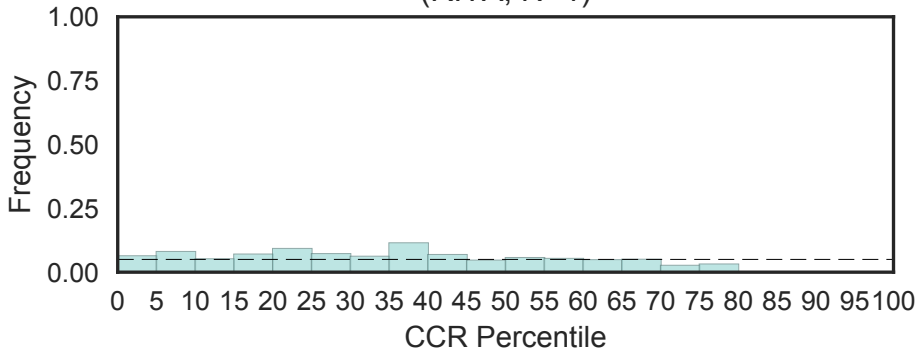

rRNA processing/ribosome biogenesis  
(RIX1, N=1)

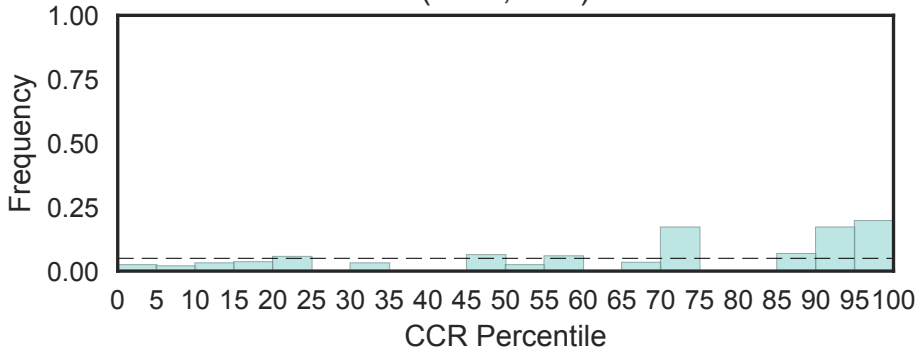

Possible Fer4-like domain in RNase L inhibitor, RLI  
(RLI, N=2)

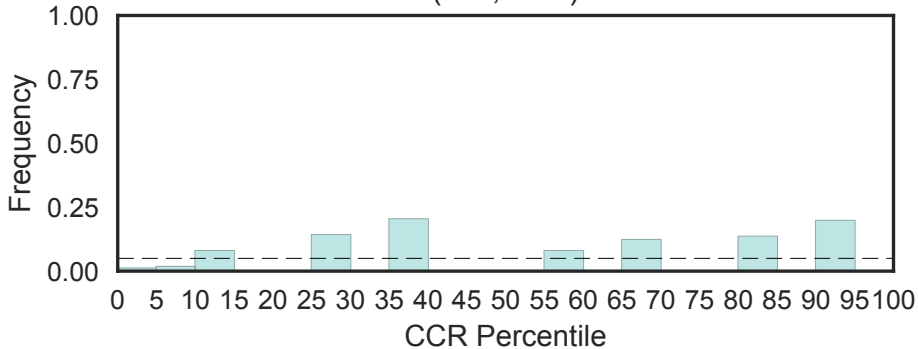

Putative carnitine deficiency-associated protein  
(RLL, N=1)

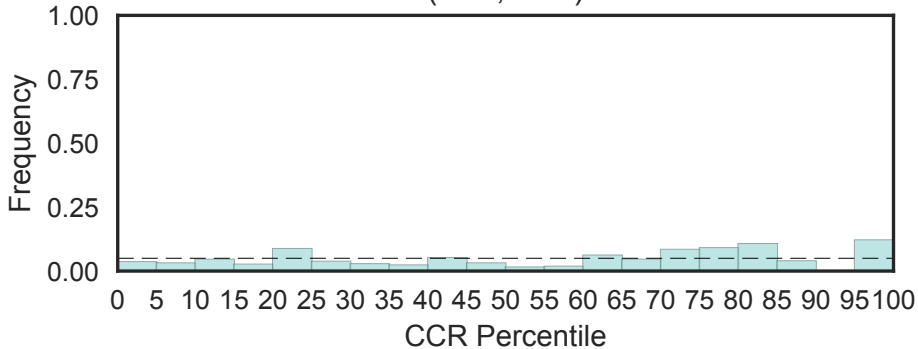

# Recq-mediated genome instability protein 1, C-terminal OB-fold (RMI1\_C, N=1)

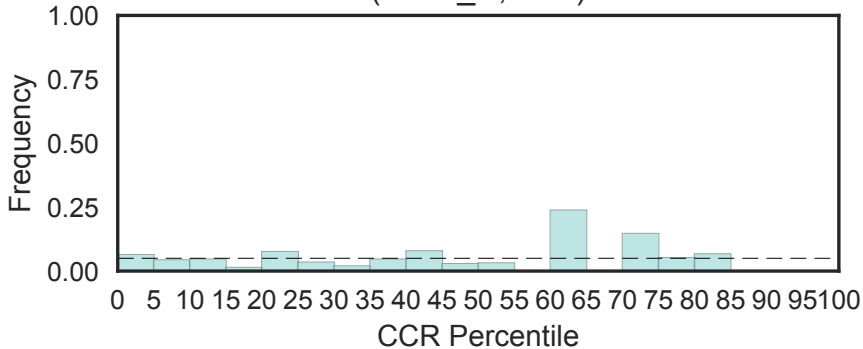

RecQ mediated genome instability protein  
(RMI1\_N, N=2)

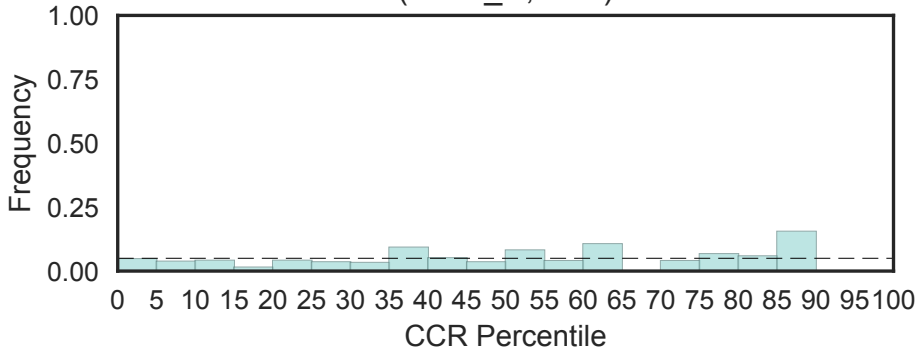

# RecQ-mediated genome instability protein 2 (RMI2, N=1)

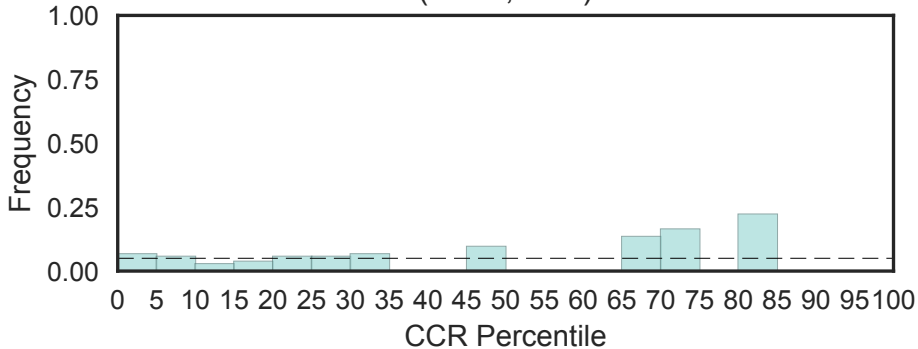

Zn-dependent metallo-hydrolase RNA specificity domain  
(RMMBL, N=3)

Fisher's OR: 1.72; Bonferroni p-val: 1

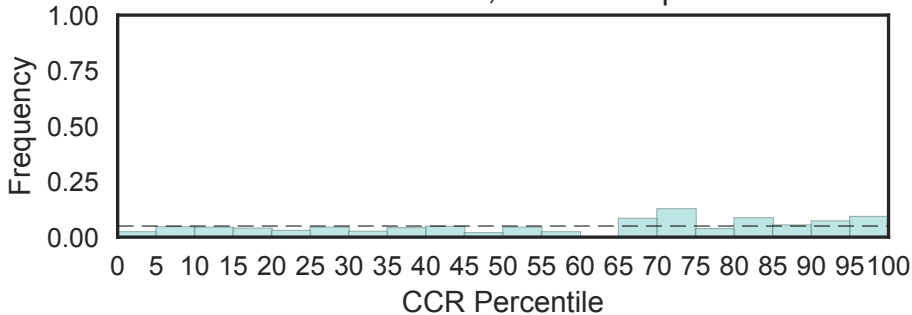



# Retinal Maintenance (RMP, N=1)

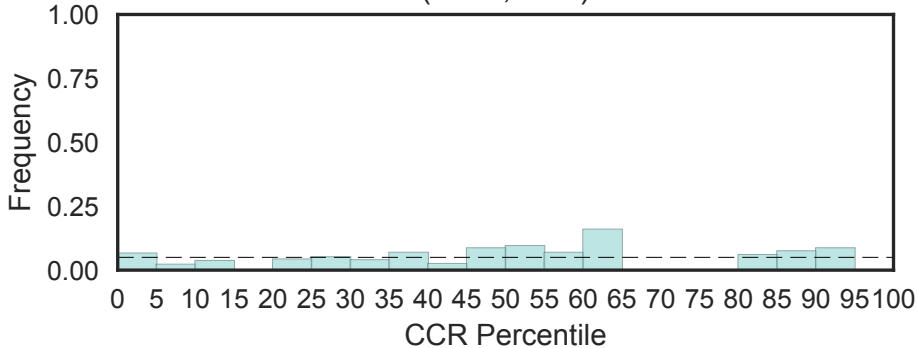

PHAX RNA-binding domain  
(RNA\_GG\_bind, N=1)

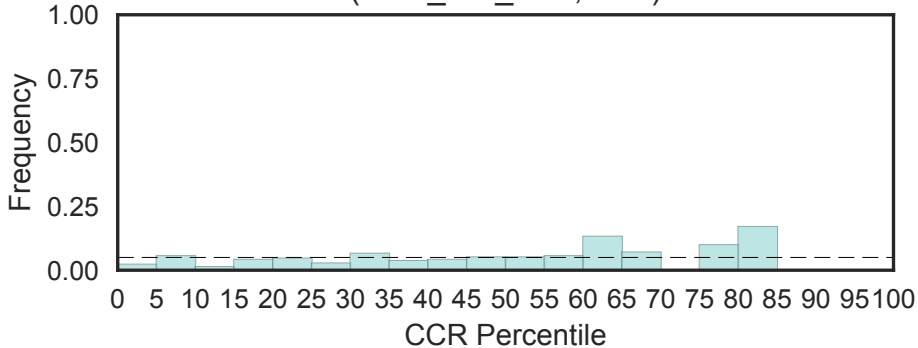

RNA polymerases M/15 Kd subunit  
(RNA\_POL\_M\_15KD, N=2)

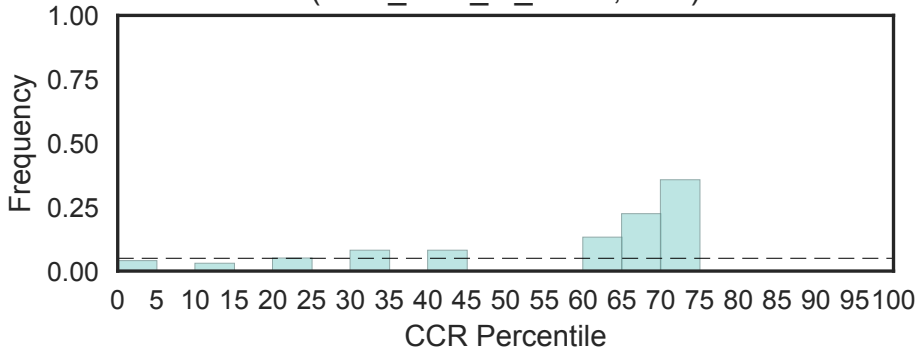

RNA binding domain  
(RNA\_bind, N=1)

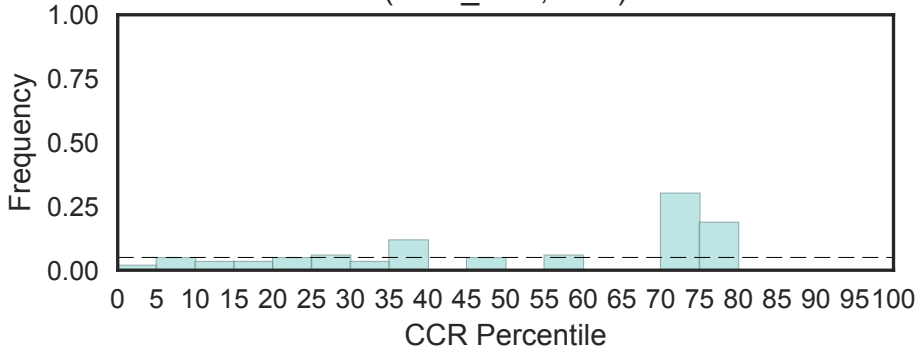

RNA ligase  
(RNA\_ligase, N=1)

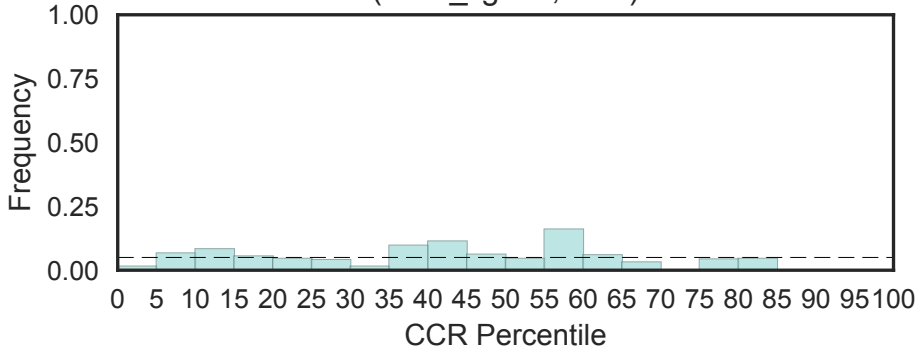

# DNA-dependent RNA polymerase (RNA\_pol, N=1)

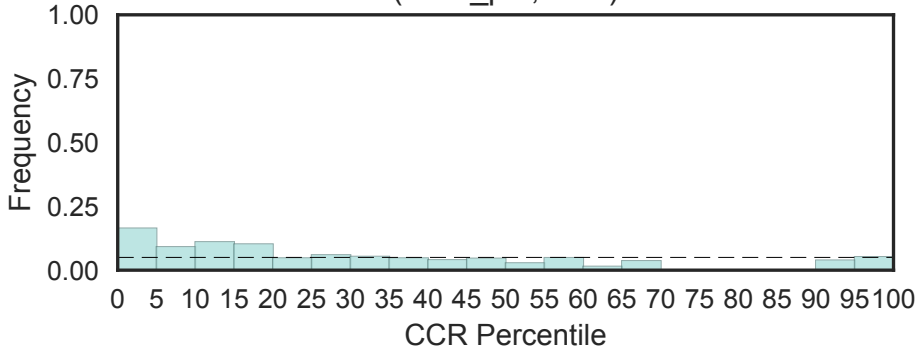

DNA-directed RNA polymerase I subunit RPA34.5  
(RNA\_poll\_A34, N=1)

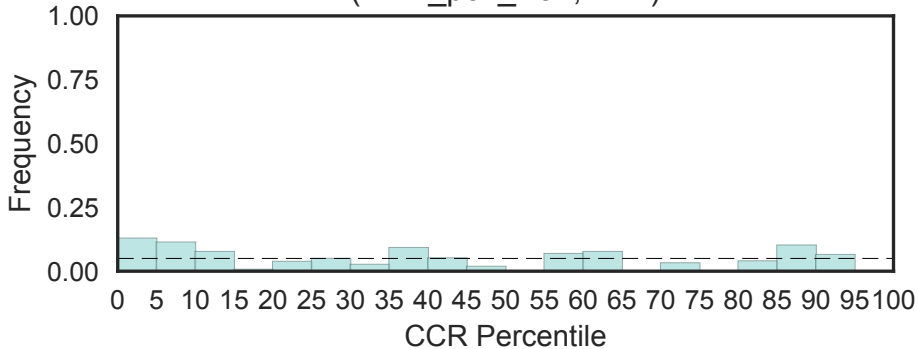

DNA-directed RNA polymerase III subunit Rpc31  
(RNA\_pol\_3\_Rpc31, N=2)

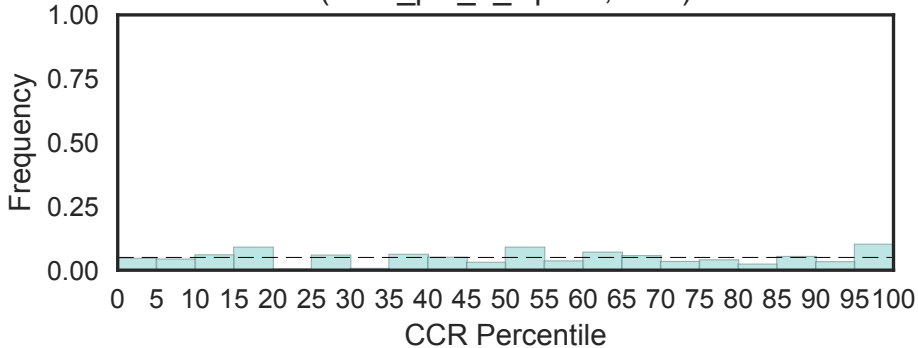



RNA polymerase Rpb3/RpoA insert domain  
(RNA\_pol\_A\_bac, N=2)

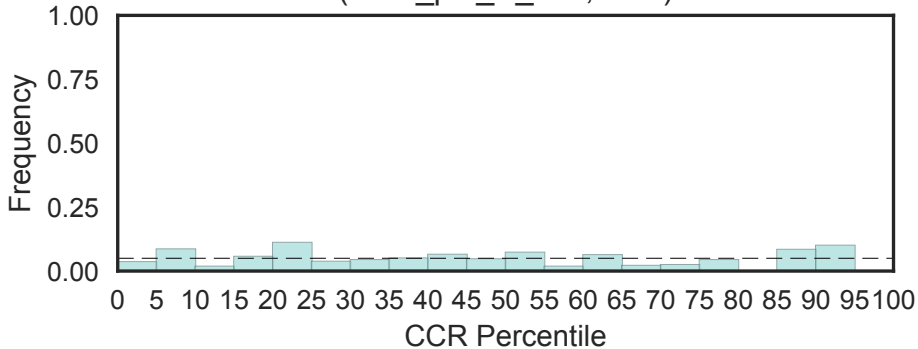

A49-like RNA polymerase I associated factor  
(RNA\_pol\_I\_A49, N=1)

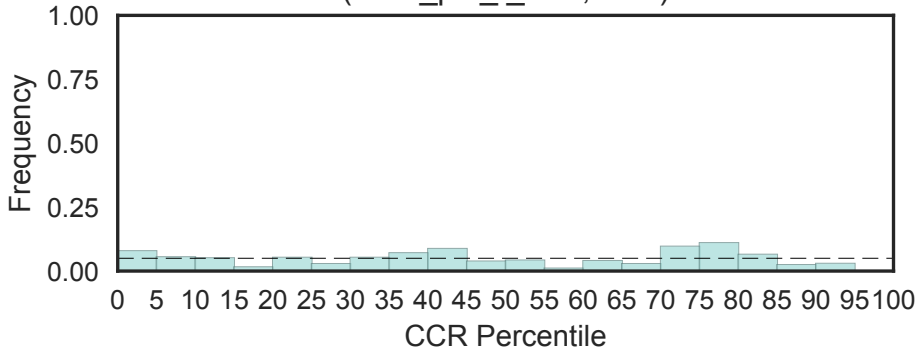

RNA polymerase Rpb3/Rpb11 dimerisation domain  
(RNA\_pol\_L, N=7)

Fisher's OR: 0; Bonferroni p-val: 1

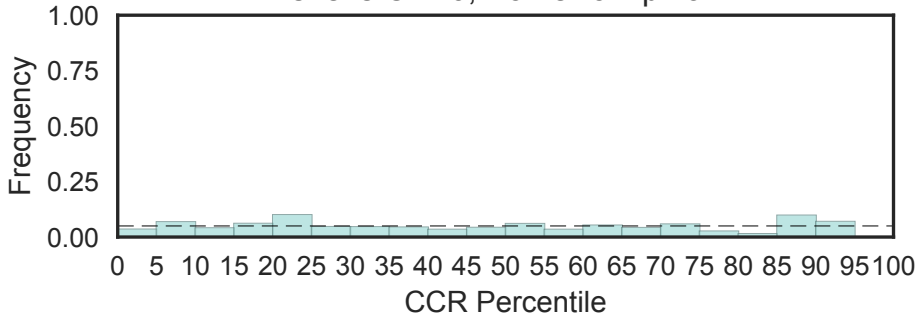

RNA polymerase Rpb3/Rpb11 dimerisation domain  
(RNA\_pol\_L\_2, N=5)

Fisher's OR: 0; Bonferroni p-val: 1

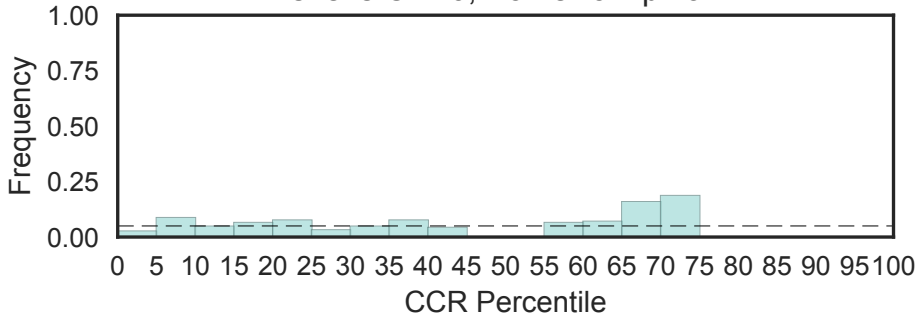

RNA polymerases N / 8 kDa subunit  
(RNA\_pol\_N, N=1)

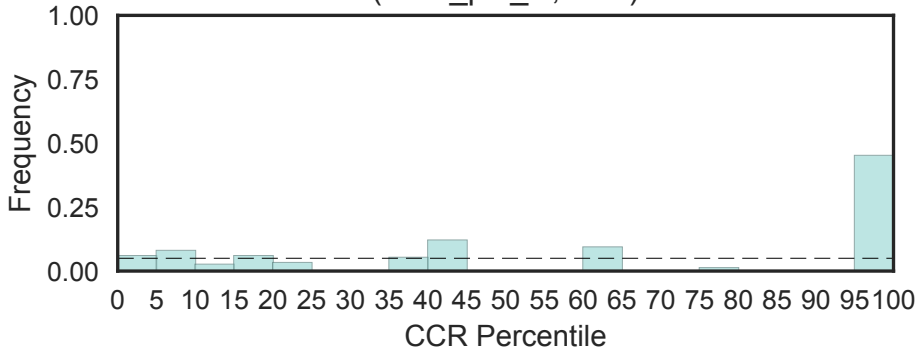

RNA polymerase III subunit Rpc25  
(RNA\_pol\_Rbc25, N=1)

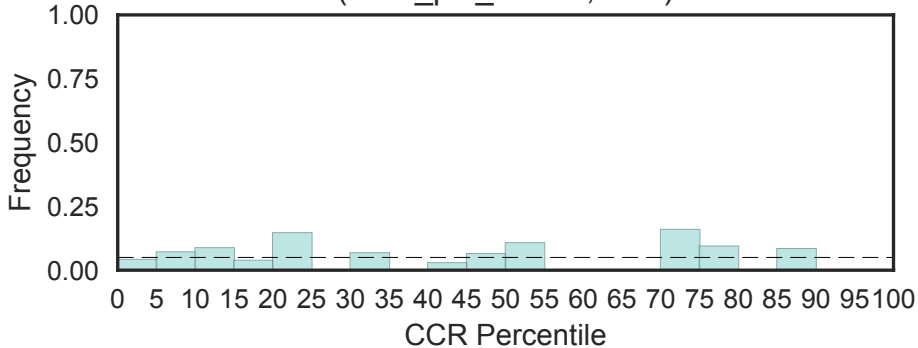

RNA polymerase I, Rpa2 specific domain  
(RNA\_pol\_Rpa2\_4, N=1)

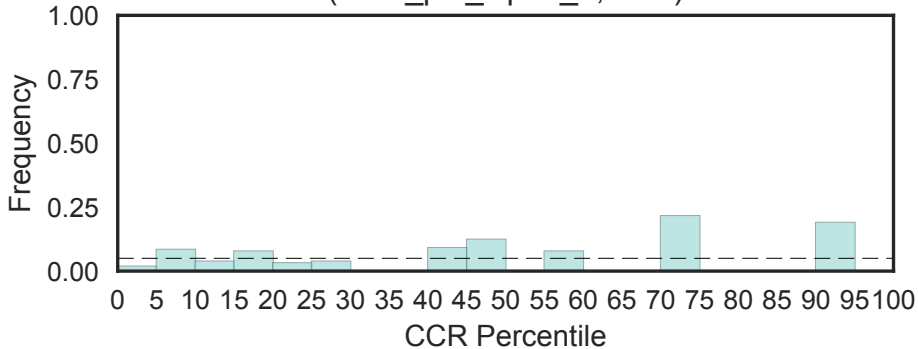

RNA polymerase Rpb1, domain 1  
(RNA\_pol\_Rpb1\_1, N=3)  
Fisher's OR: 2.47; Bonferroni p-val: 1

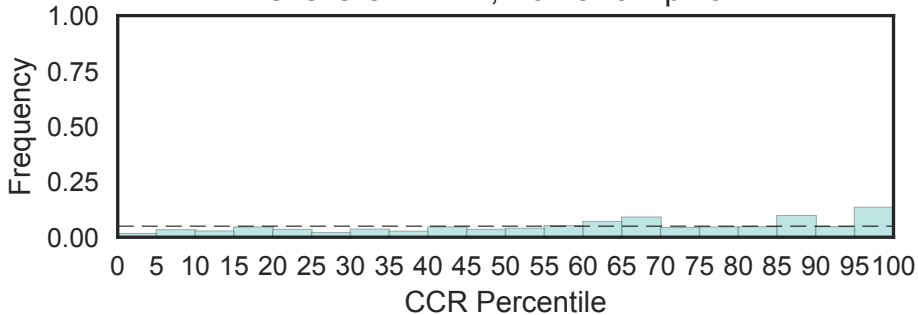



RNA polymerase Rpb1, domain 2  
(RNA\_pol\_Rpb1\_2, N=3)  
Fisher's OR: 4.99; Bonferroni p-val: 1

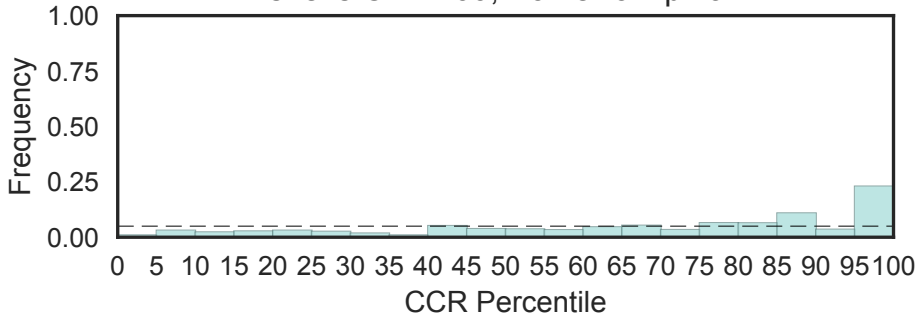

RNA polymerase Rpb1, domain 3  
(RNA\_pol\_Rpb1\_3, N=3)  
Fisher's OR: 1.23; Bonferroni p-val: 1

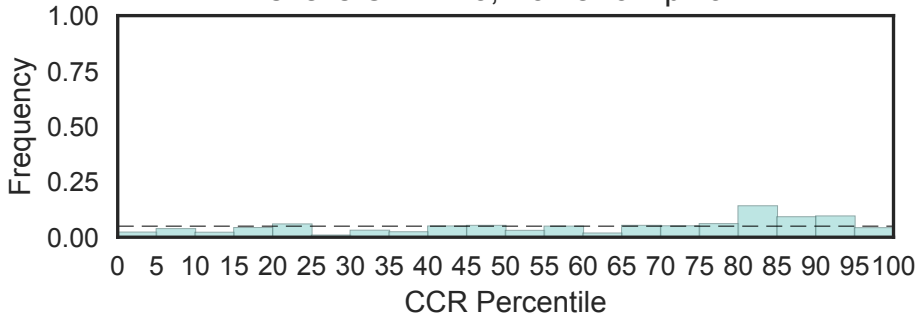

RNA polymerase Rpb1, domain 4  
(RNA\_pol\_Rpb1\_4, N=3)  
Fisher's OR: 5.23; Bonferroni p-val: 1

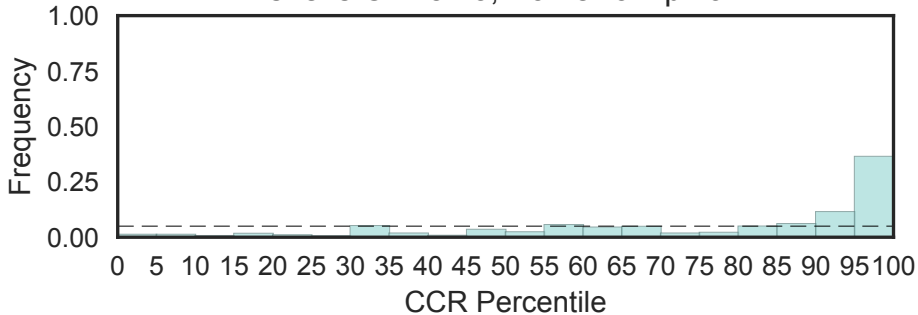

RNA polymerase Rpb1, domain 5  
(RNA\_pol\_Rpb1\_5, N=3)  
Fisher's OR: 2.54; Bonferroni p-val: 1

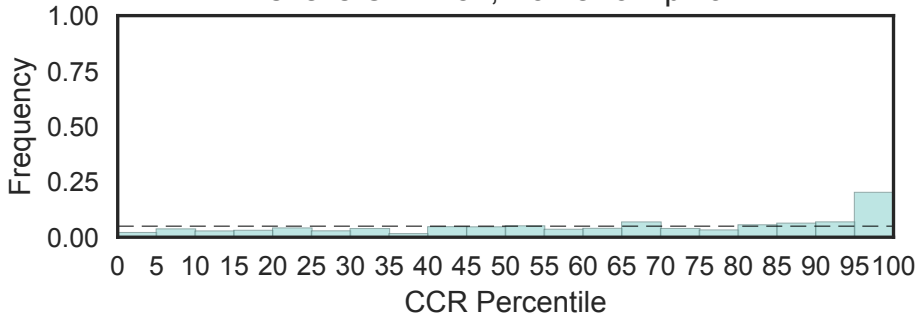

RNA polymerase Rpb1, domain 6  
(RNA\_pol\_Rpb1\_6, N=1)

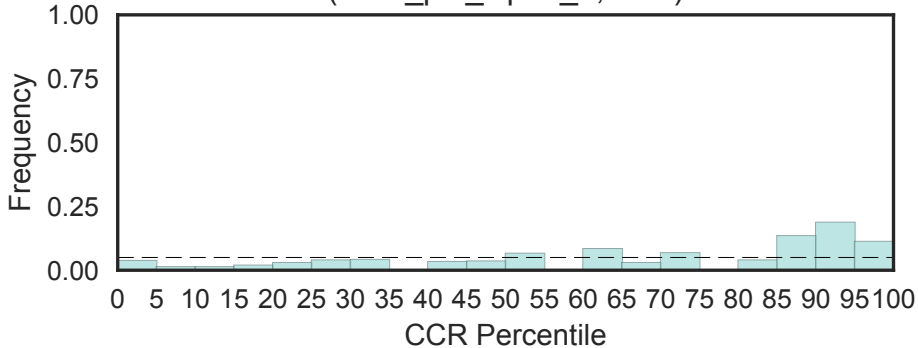

RNA polymerase Rpb1, domain 7  
(RNA\_pol\_Rpb1\_7, N=1)

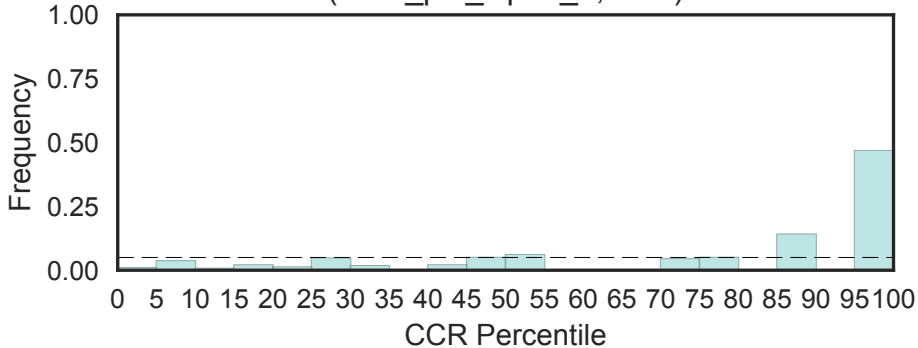

RNA polymerase Rpb1 C-terminal repeat  
(RNA\_pol\_Rpb1\_R, N=22)

Fisher's OR: 1.95; Bonferroni p-val: 1

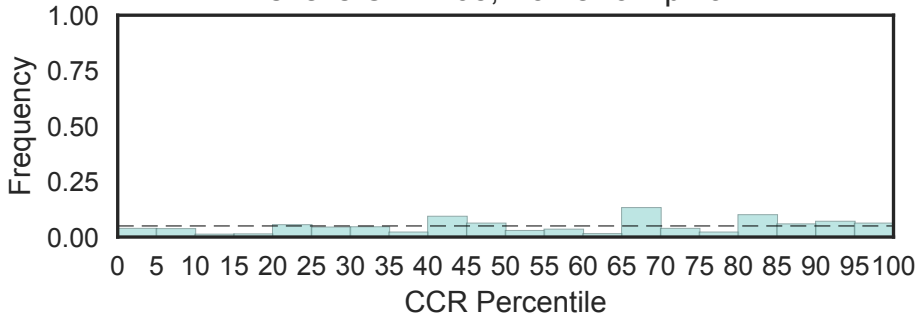

RNA polymerase beta subunit  
(RNA\_pol\_Rpb2\_1, N=3)

Fisher's OR: 4.28; Bonferroni p-val: 0.267

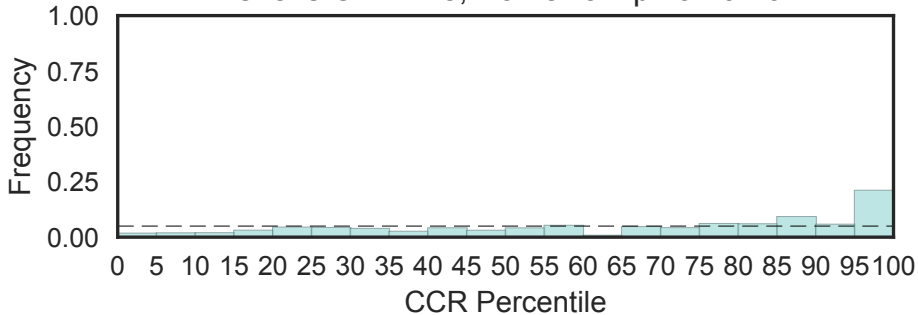



RNA polymerase Rpb2, domain 2  
(RNA\_pol\_Rpb2\_2, N=3)

Fisher's OR: 6.67; Bonferroni p-val: 0.0933

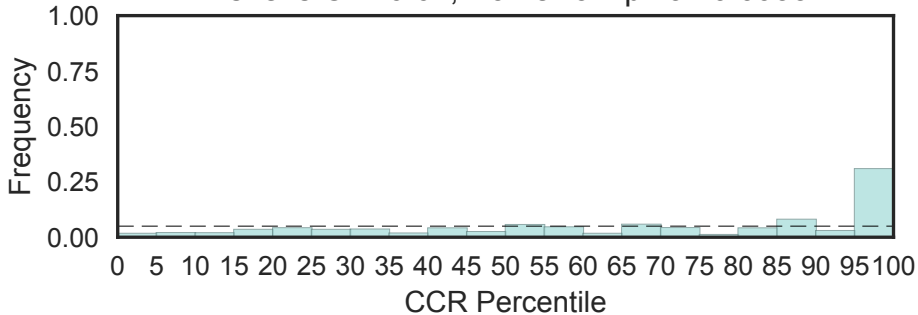

RNA polymerase Rpb2, domain 3  
(RNA\_pol\_Rpb2\_3, N=3)  
Fisher's OR: 10.1; Bonferroni p-val: 1

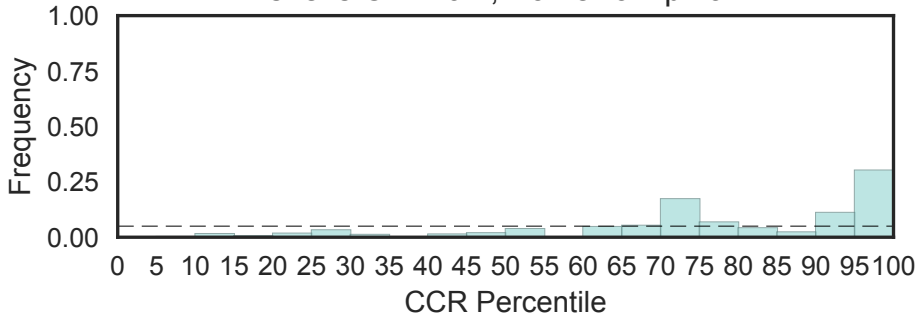

RNA polymerase Rpb2, domain 4  
(RNA\_pol\_Rpb2\_4, N=2)

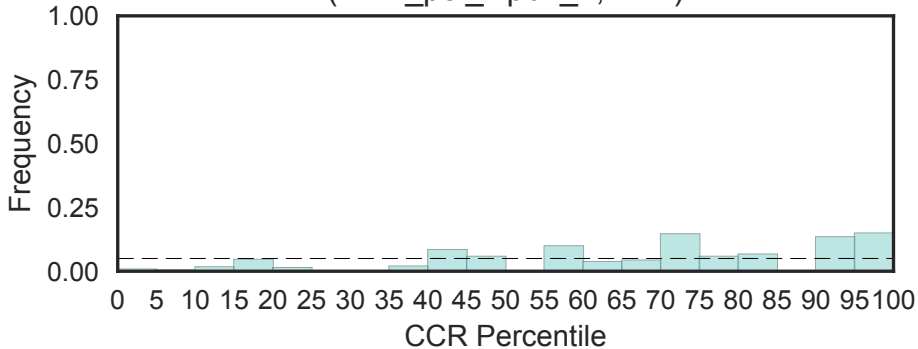

RNA polymerase Rpb2, domain 5  
(RNA\_pol\_Rpb2\_5, N=2)

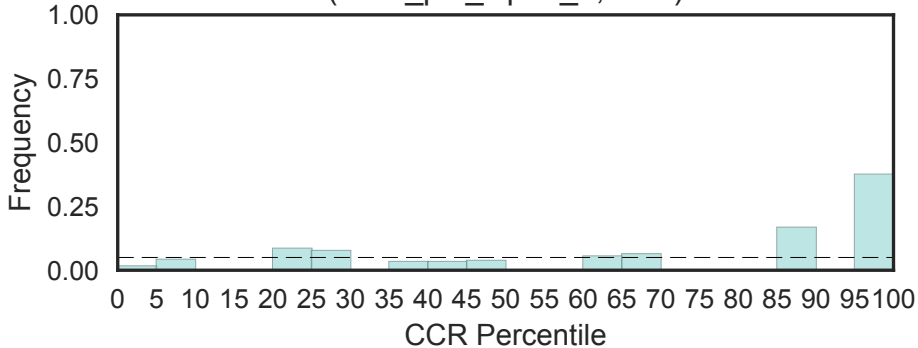

RNA polymerase Rpb2, domain 6  
(RNA\_pol\_Rpb2\_6, N=4)

Fisher's OR: 6.81; Bonferroni p-val: 1.39e-05

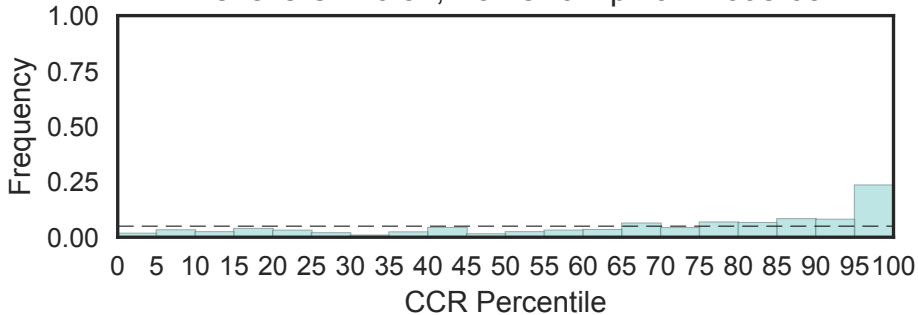

RNA polymerase Rpb2, domain 7  
(RNA\_pol\_Rpb2\_7, N=3)  
Fisher's OR: 5.59; Bonferroni p-val: 1

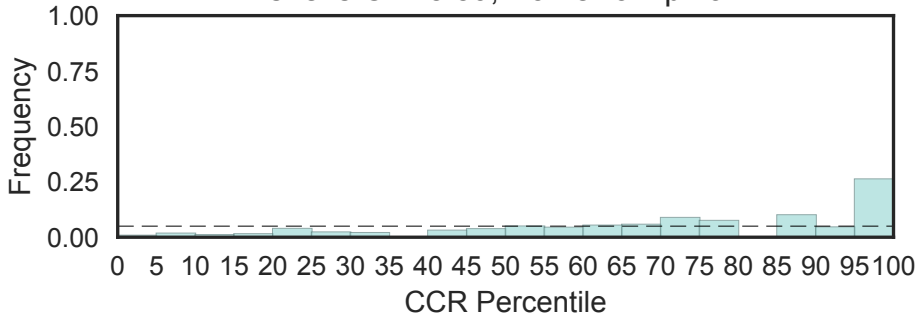

RNA polymerase Rpb4  
(RNA\_pol\_Rpb4, N=3)

Fisher's OR: 0.932; Bonferroni p-val: 1

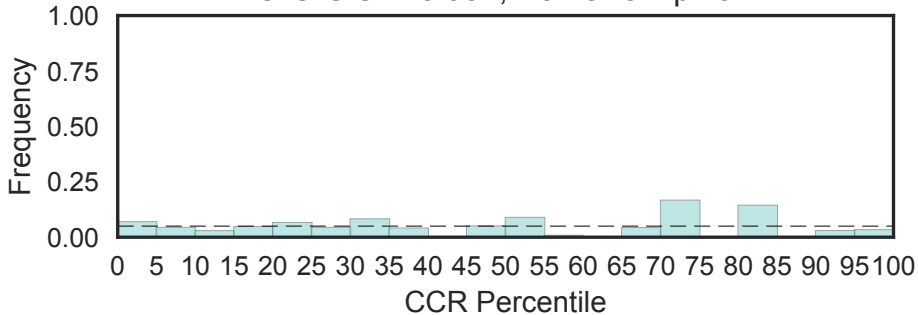

RNA polymerase Rpb5, C-terminal domain  
(RNA\_pol\_Rpb5\_C, N=1)

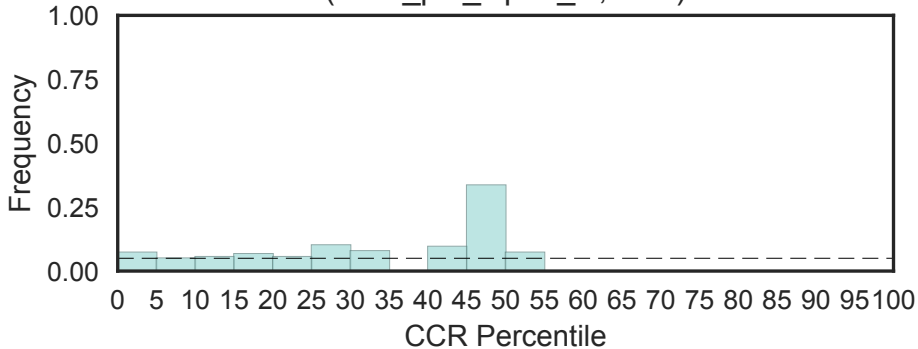



RNA polymerase Rpb5, N-terminal domain  
(RNA\_pol\_Rpb5\_N, N=1)

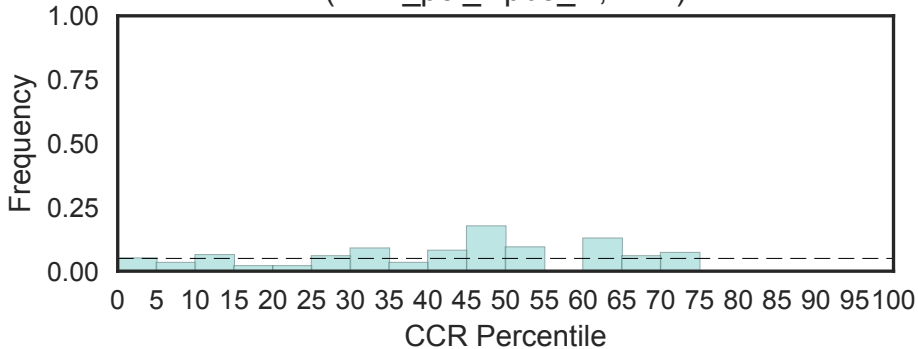

RNA polymerase Rpb6  
(RNA\_pol\_Rpb6, N=1)

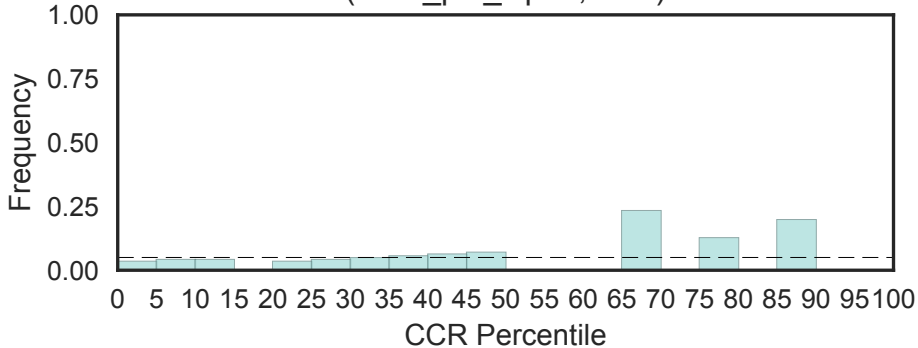

RNA polymerase Rpb8  
(RNA\_pol\_Rpb8, N=1)

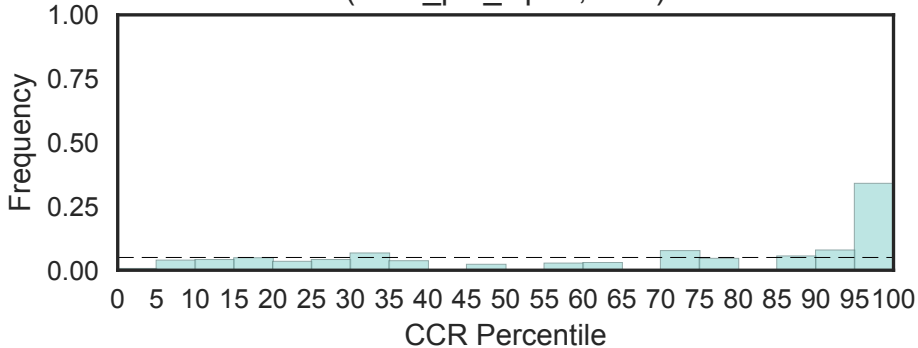

RNA polymerase Rpc34 subunit  
(RNA\_pol\_Rpc34, N=1)

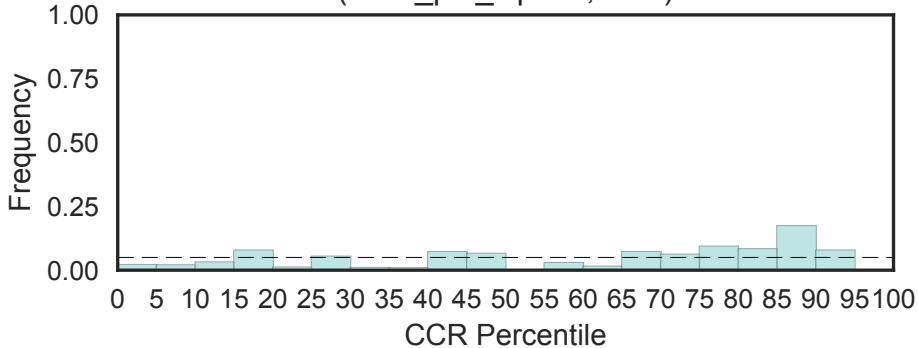

RNA polymerase III RPC4  
(RNA\_pol\_Rpc4, N=1)

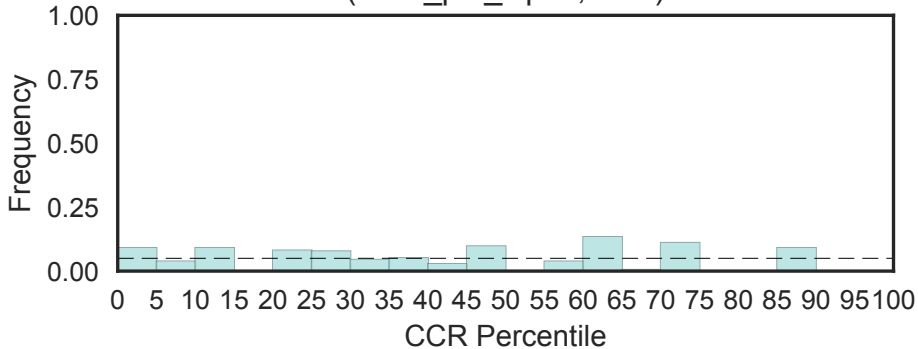

RNA polymerase III subunit RPC82  
(RNA\_pol\_Rpc82, N=1)

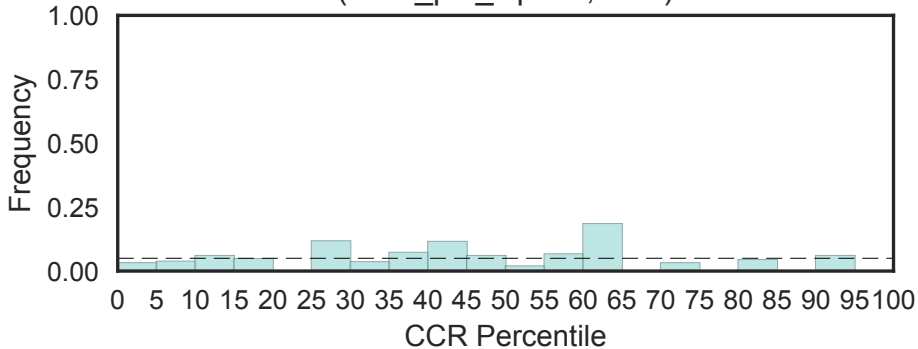

RNB domain  
(RNB, N=4)

Fisher's OR: 0; Bonferroni p-val: 1

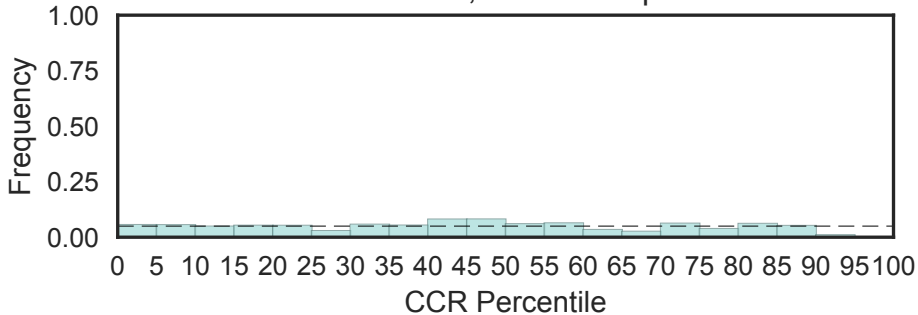

E3 ubiquitin-protein ligase Arkadia N-terminus  
(RNF111\_N, N=2)

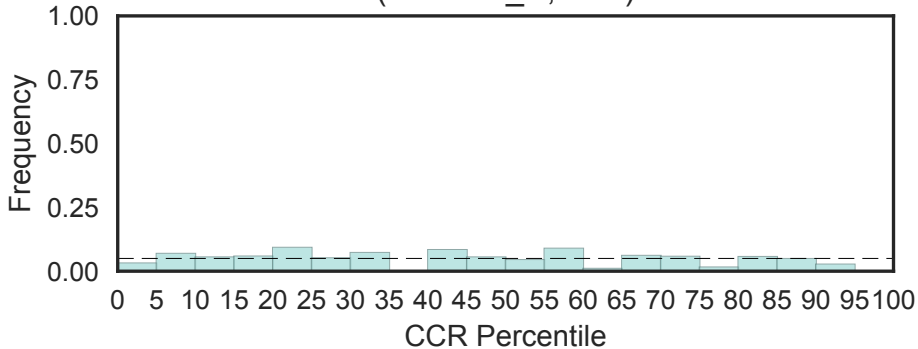



E3 ubiquitin-protein ligase RNF220  
(RNF220, N=2)

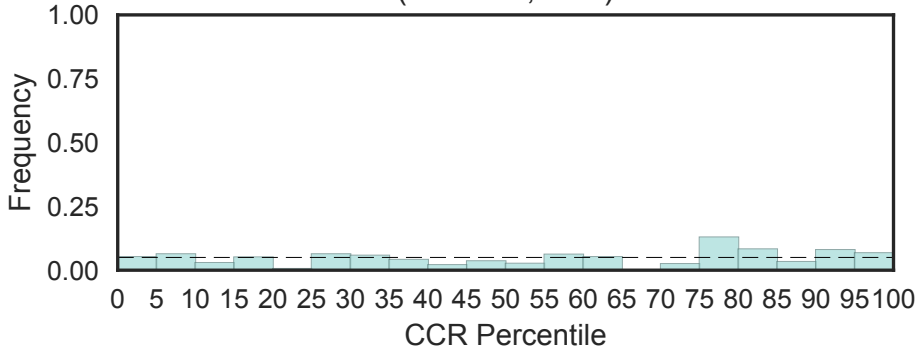

# RNase H (RNase\_H, N=2)

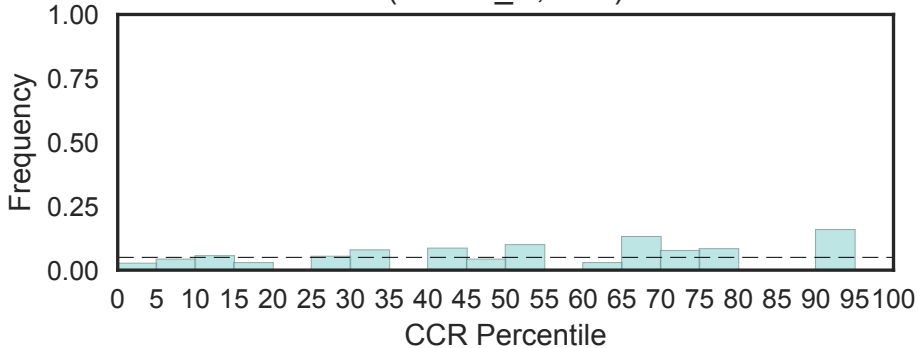

Ydr279p protein family (RNase H2 complex component)  
(RNase\_H2-Ydr279, N=1)

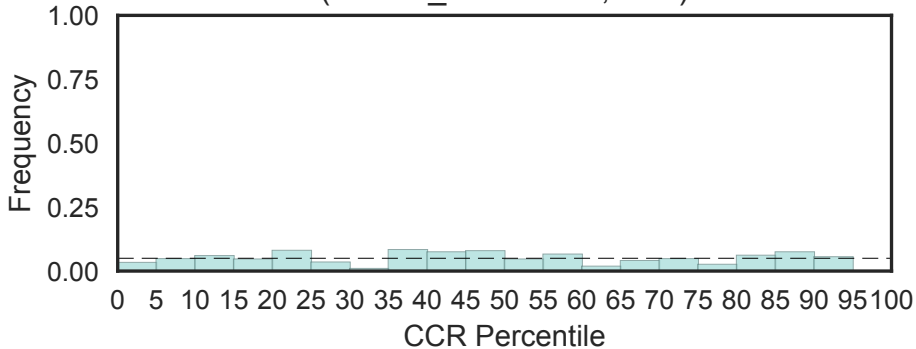

Ribonuclease H2 non-catalytic subunit (Ylr154p-like)  
(RNase\_H2\_suC, N=1)

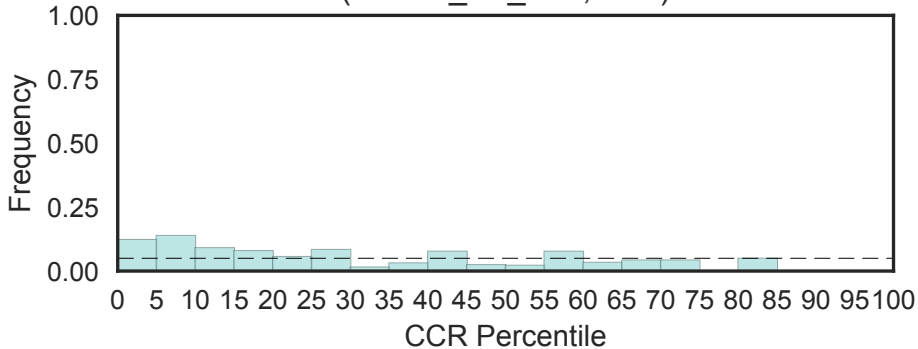

Ribonuclease HII  
(RNase\_HII, N=1)

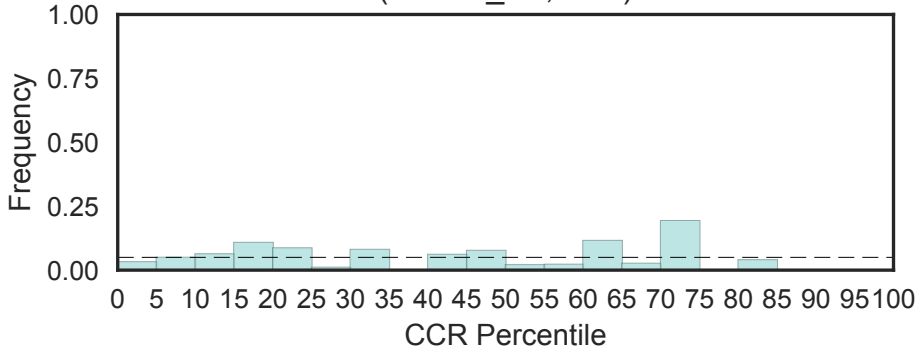

RNase\_H superfamily  
(RNase\_H\_2, N=1)

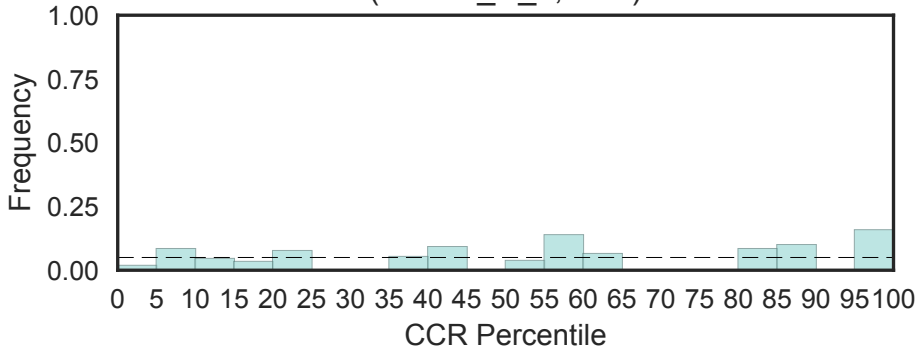

3' exoribonuclease family, domain 1  
(RNase\_PH, N=8)

Fisher's OR: 0.262; Bonferroni p-val: 1

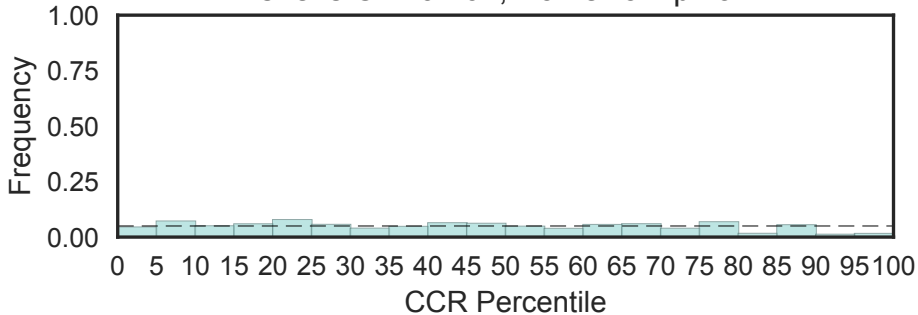

3' exoribonuclease family, domain 2  
(RNase\_PH\_C, N=6)

Fisher's OR: 0; Bonferroni p-val: 1

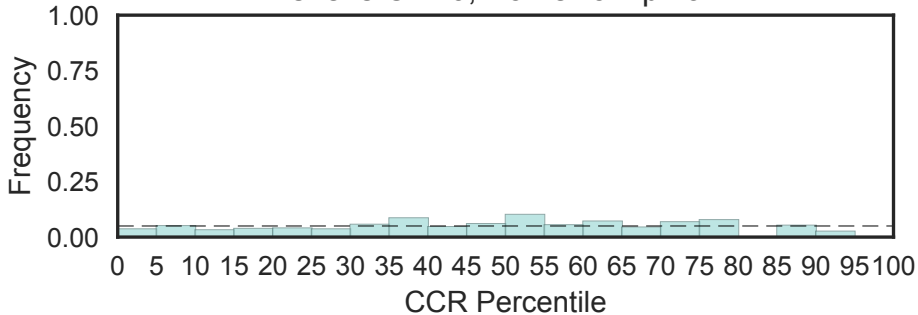



Rpp14/Pop5 family  
(RNase\_P\_Rpp14, N=2)

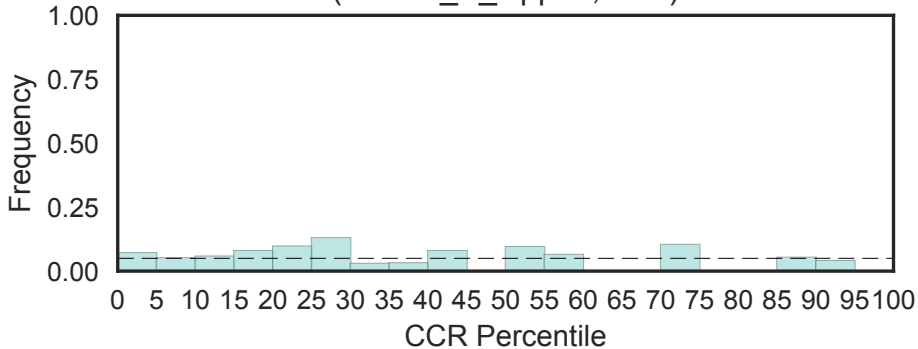

RNase P subunit p30  
(RNase\_P\_p30, N=1)

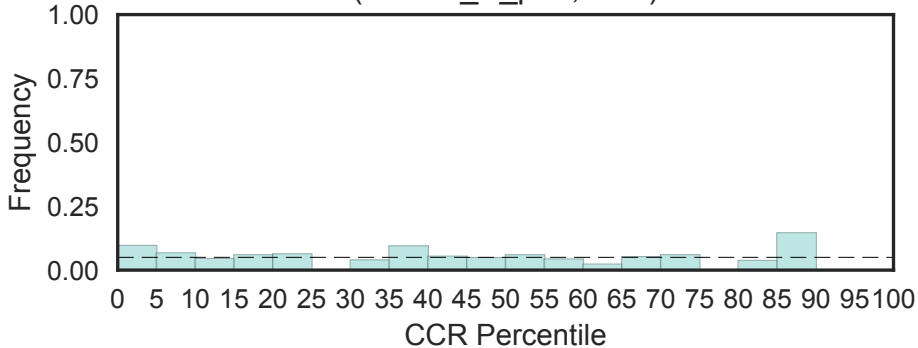

RNase P subunit Pop3  
(RNase\_P\_pop3, N=1)

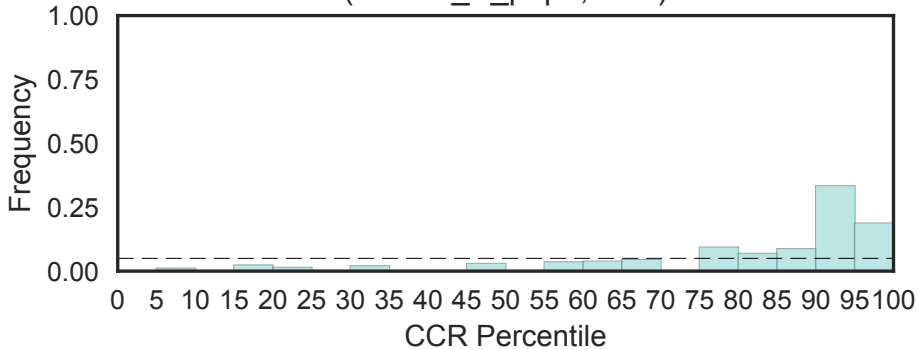

# Exonuclease

(RNase\_T, N=12)

Fisher's OR: 1.31; Bonferroni p-val: 1

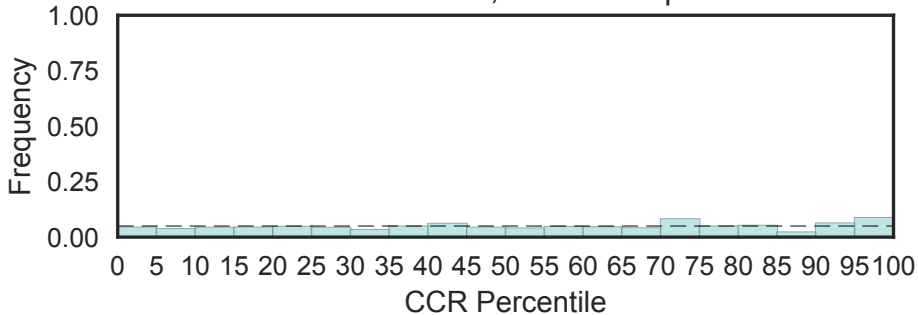

Zc3h12a-like Ribonuclease NYN domain  
(RNase\_Zc3h12a, N=6)

Fisher's OR: 1.5; Bonferroni p-val: 1

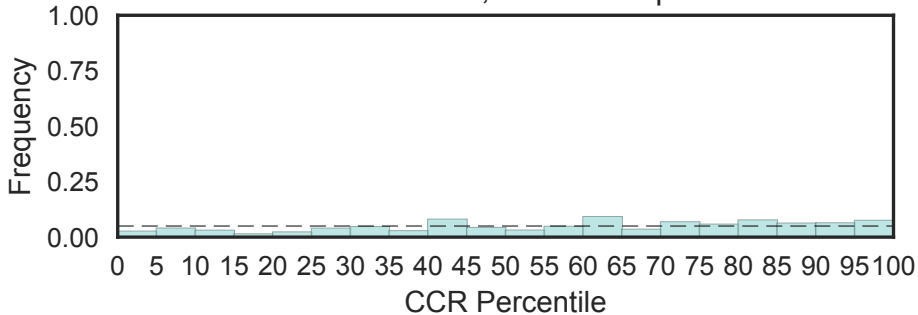

ROK family  
(ROK, N=1)

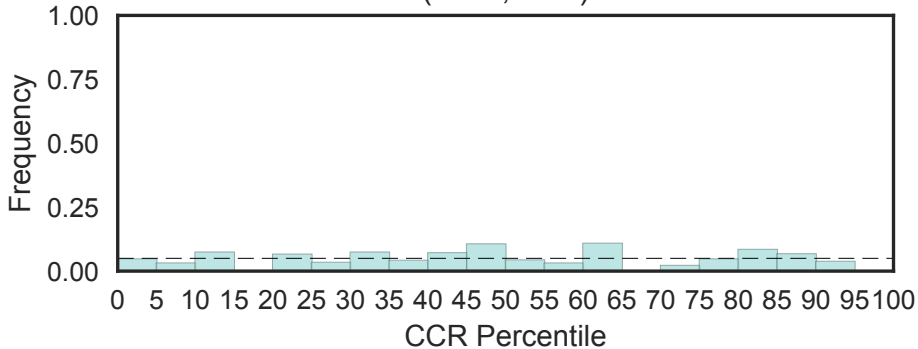

ROKNT (NUC014) domain  
(ROKNT, N=1)

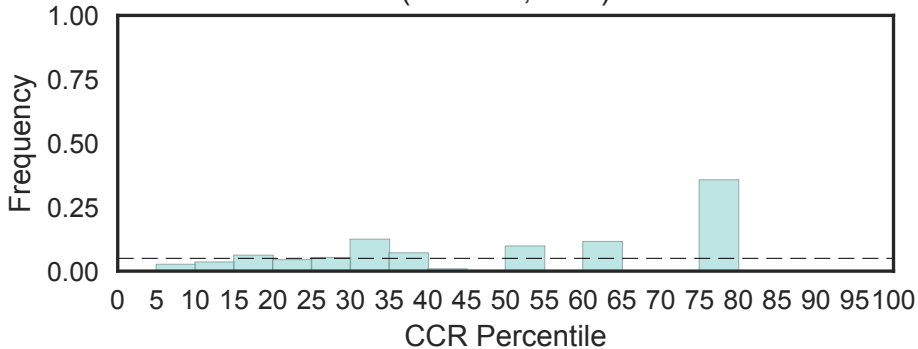

RPAP1-like, C-terminal  
(RPAP1\_C, N=1)

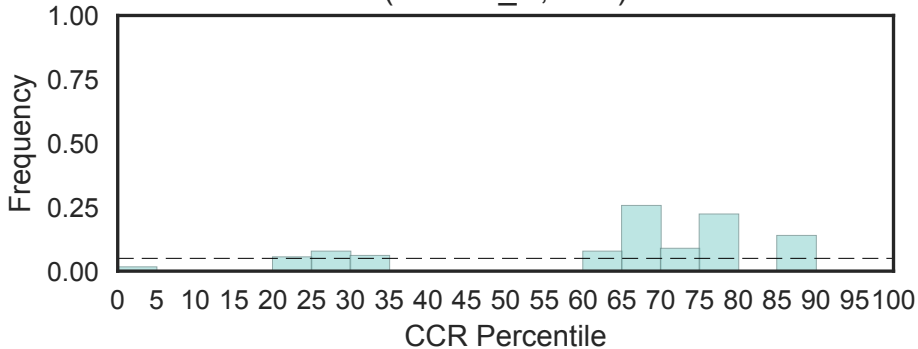



RPAP1-like, N-terminal  
(RPAP1\_N, N=1)

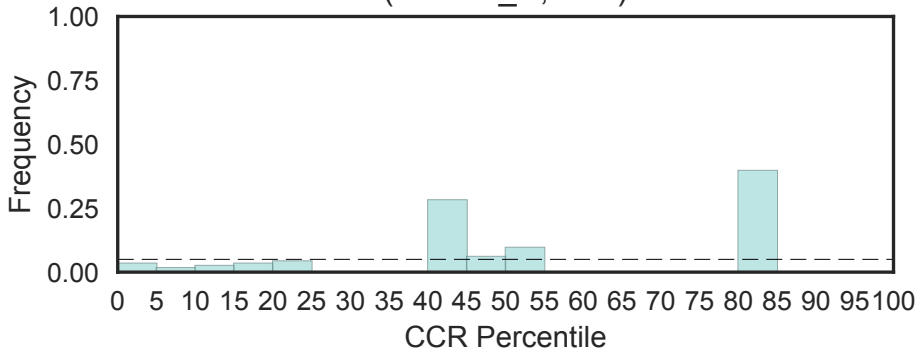

Rtr1/RPAP2 family  
(RPAP2\_Rtr1, N=1)

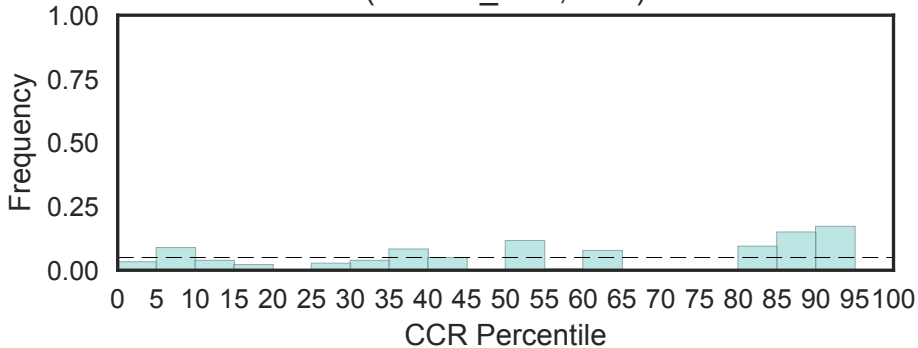

Potential Monad-binding region of RPAP3  
(RPAP3\_C, N=3)

Fisher's OR: 0; Bonferroni p-val: 1

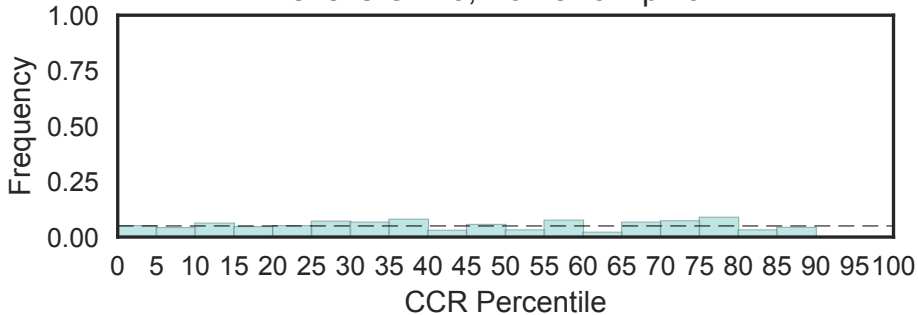

Replication protein A C terminal  
(RPA\_C, N=1)

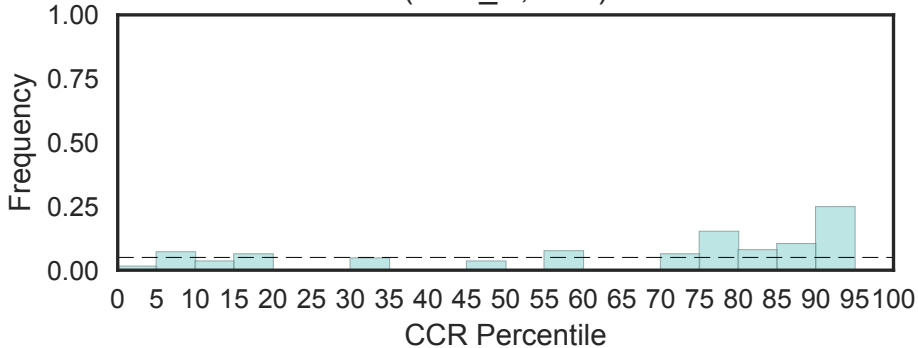

Replication protein A interacting C-terminal  
(RPA\_interact\_C, N=1)

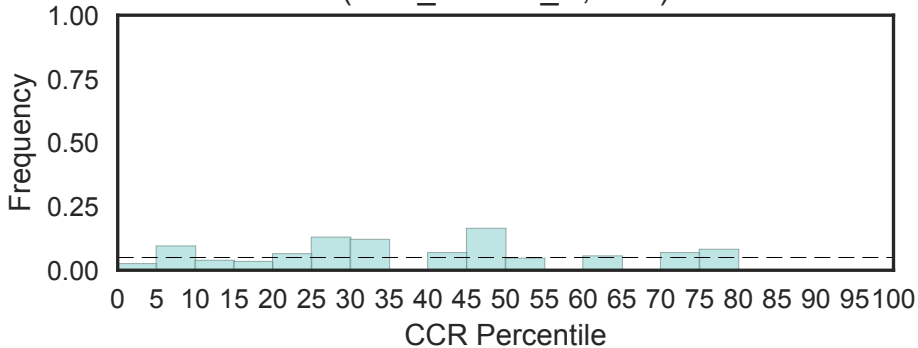

Replication protein A interacting middle  
(RPA\_interact\_M, N=1)

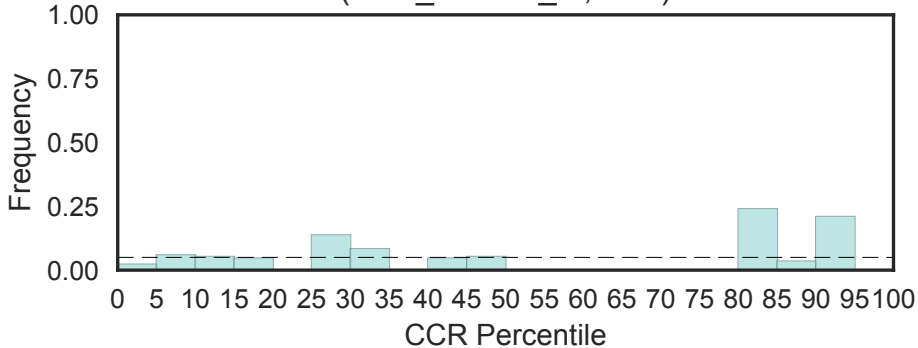

Replication protein A interacting N-terminal  
(RPA\_interact\_N, N=1)

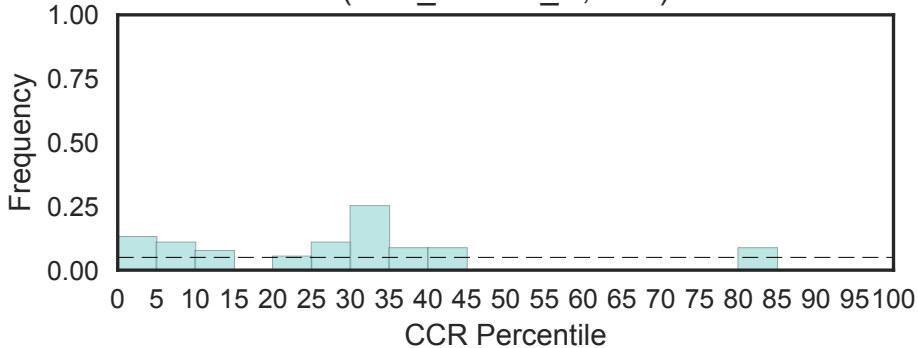

Retinal pigment epithelial membrane protein  
(RPE65, N=4)

Fisher's OR: 0; Bonferroni p-val: 1

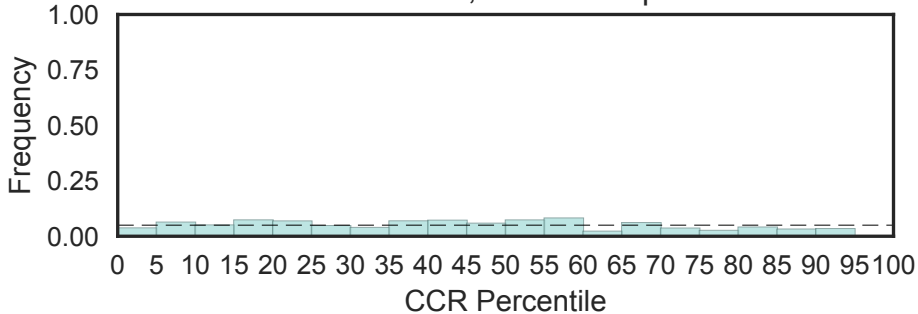



RPEL repeat  
(RPEL, N=19)

Fisher's OR: 3.81; Bonferroni p-val: 1

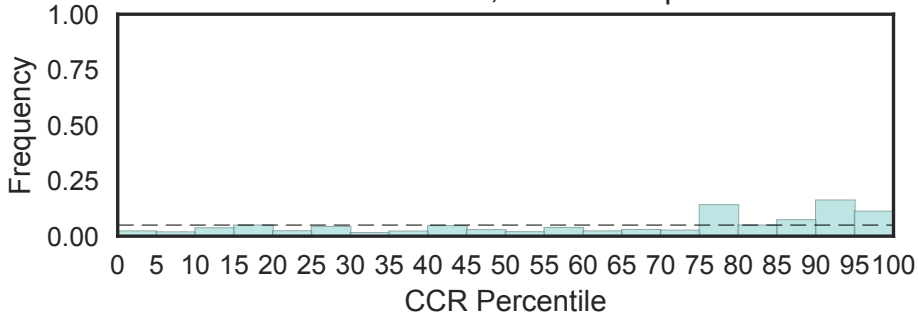

UCH-binding domain  
(RPN13\_C, N=1)

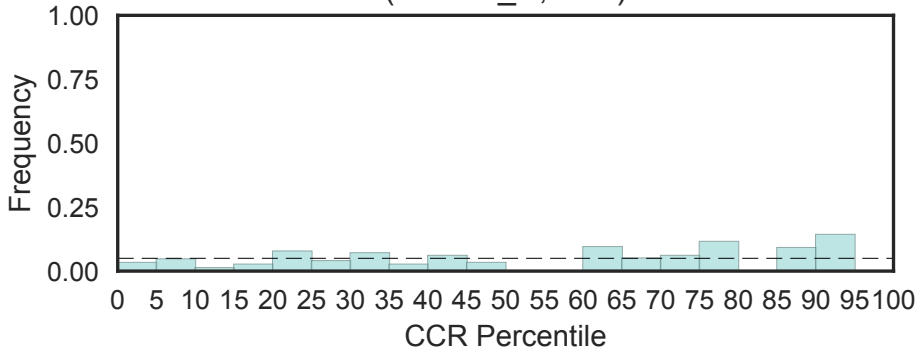

26S proteasome subunit RPN7  
(RPN7, N=2)

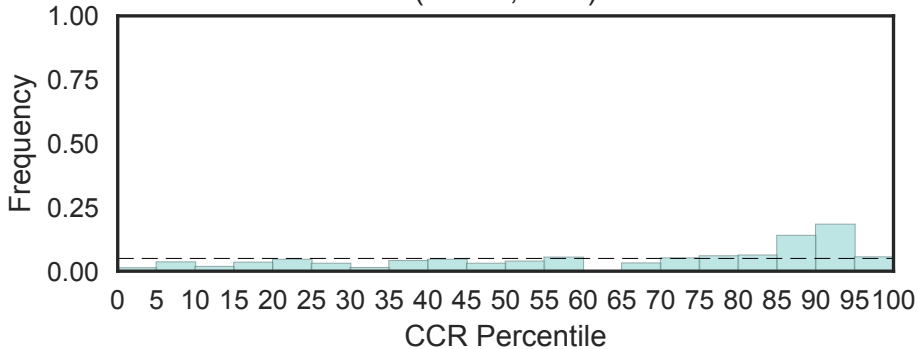

DNA-directed RNA polymerase N-terminal  
(RPOL\_N, N=1)

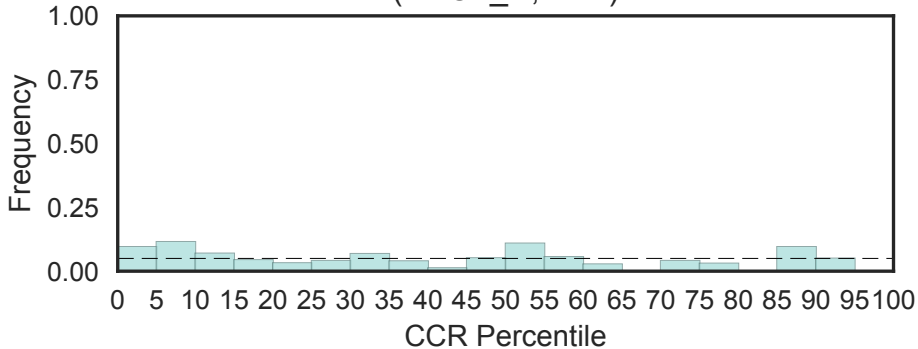

A repeated domain in UCH-protein  
(RPT, N=3)

Fisher's OR: 9.01; Bonferroni p-val: 1

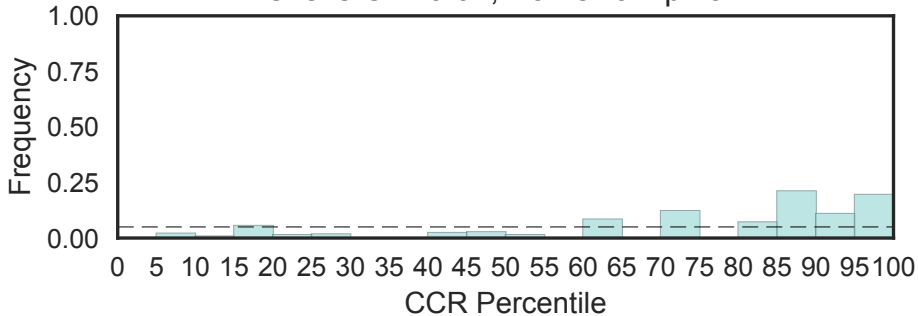

RQC domain  
(RQC, N=2)

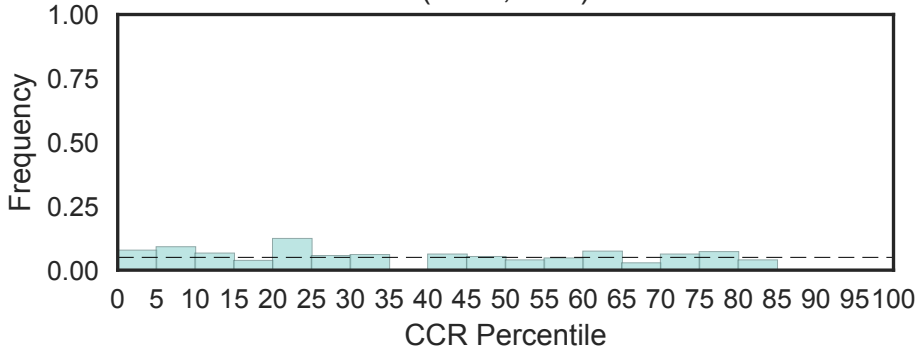

# Ribosome recycling factor (RRF, N=1)

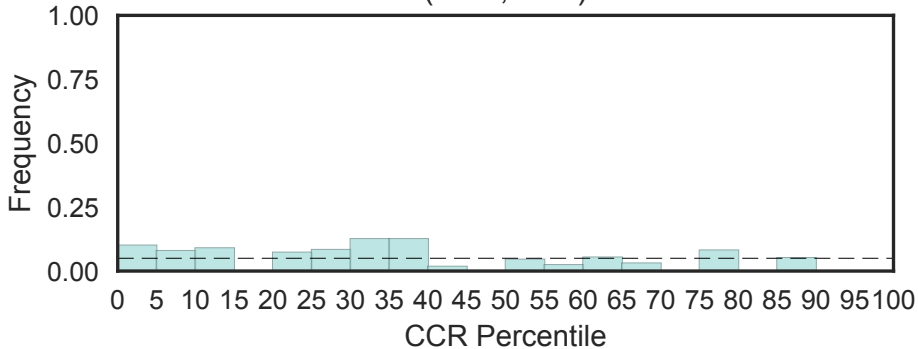

RNA recognition motif. (a.k.a. RRM, RBD, or RNP domain)  
(RRM\_1, N=321)

Fisher's OR: 6.39; Bonferroni p-val: 6.57e-118

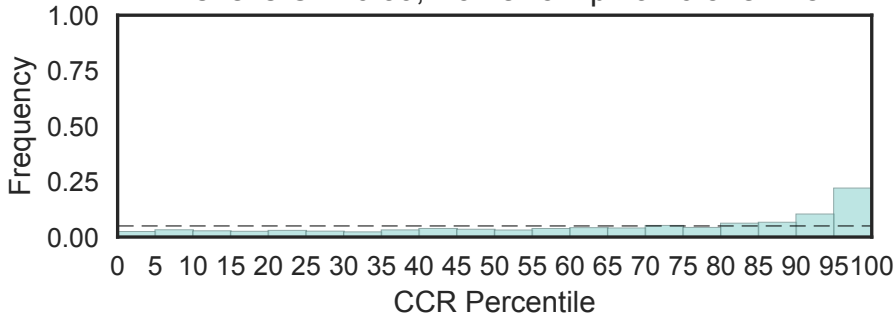



RNA binding motif  
(RRM\_3, N=4)

Fisher's OR: 0; Bonferroni p-val: 1

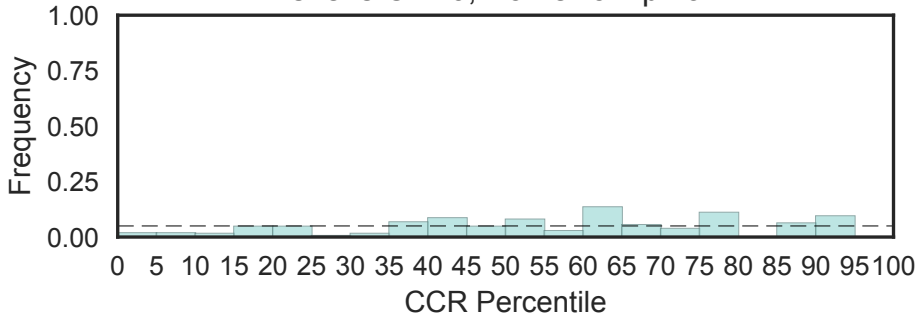

# RNA recognition motif of the spliceosomal PrP8 (RRM\_4, N=1)

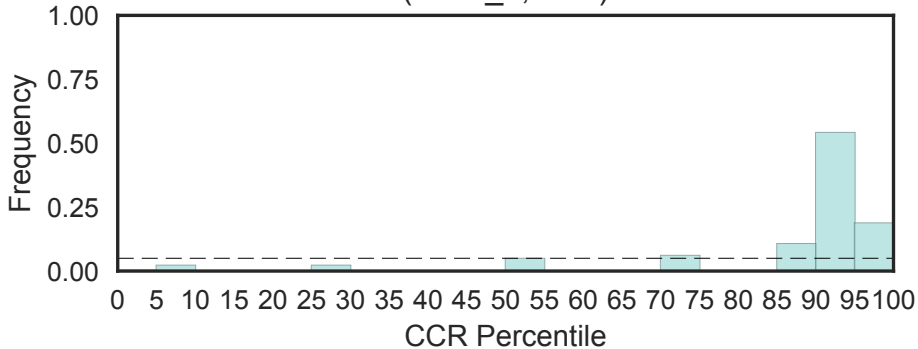

RNA recognition motif. (a.k.a. RRM, RBD, or RNP domain)  
(RRM\_5, N=95)

Fisher's OR: 5.54; Bonferroni p-val: 1.83e-30

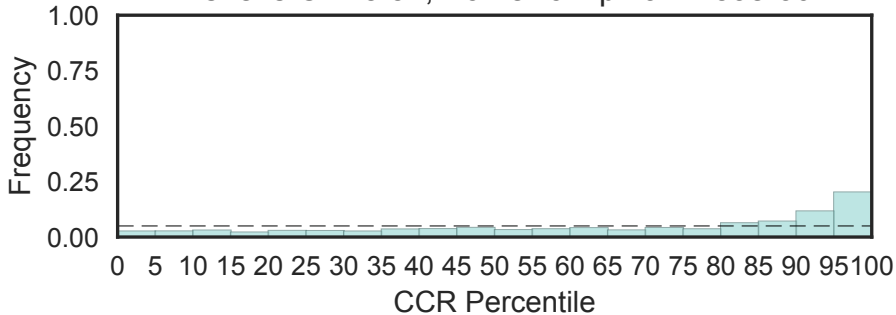

RNA recognition motif  
(RRM\_7, N=13)

Fisher's OR: 10.5; Bonferroni p-val: 6.17e-09

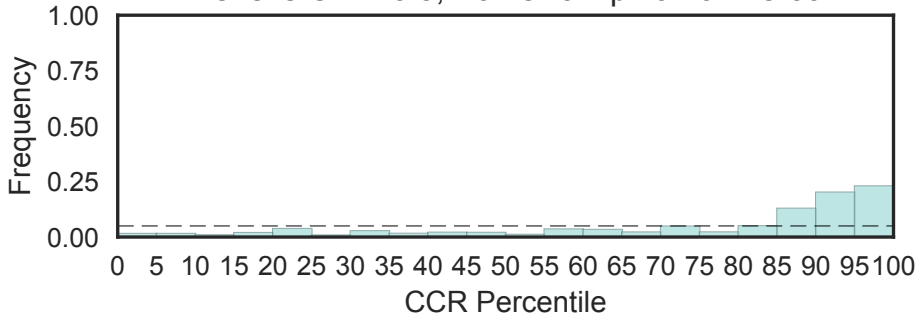

rRNA biogenesis protein RRP36  
(RRP36, N=1)

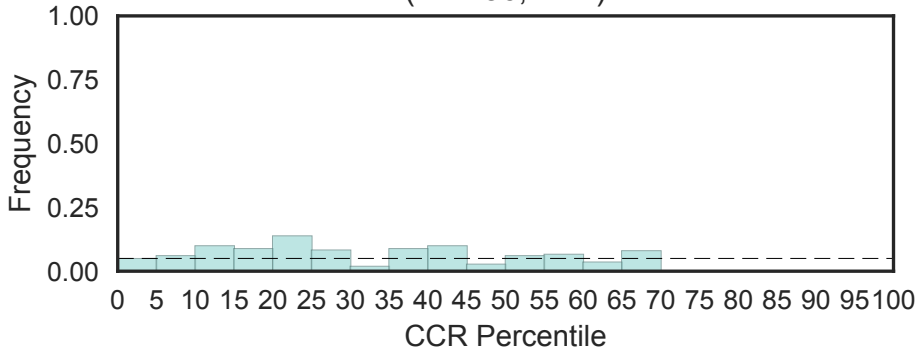

Ribosome biogenesis regulatory protein (RRS1)  
(RRS1, N=1)

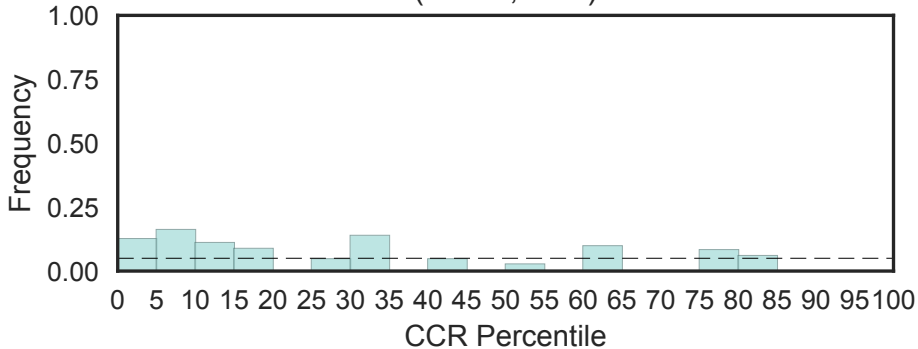

Ryanodine Receptor TM 4-6  
(RR\_TM4-6, N=3)

Fisher's OR: 1.77; Bonferroni p-val: 1

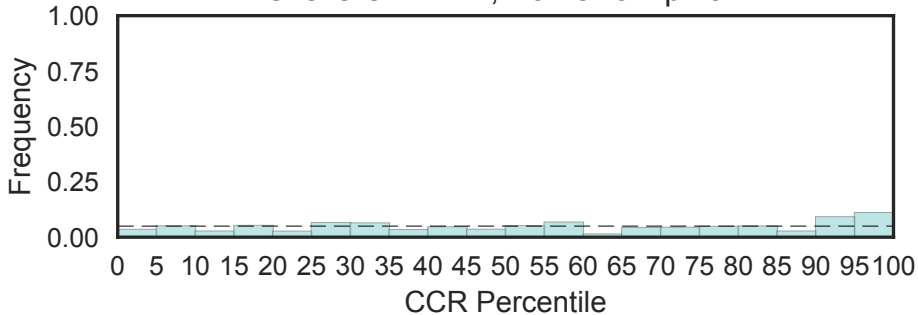

RNSP1-SAP18 binding (RSB) motif  
(RSB\_motif, N=1)

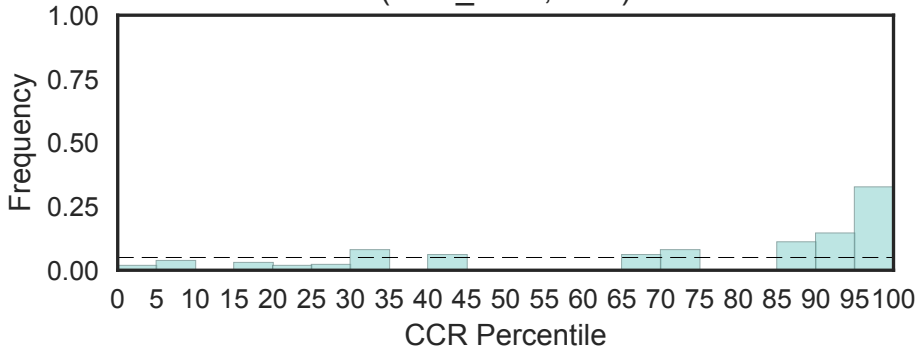



Calcium-dependent channel, 7TM region, putative phosphate  
(RSN1\_7TM, N=3)

Fisher's OR: 5.05; Bonferroni p-val: 0.306

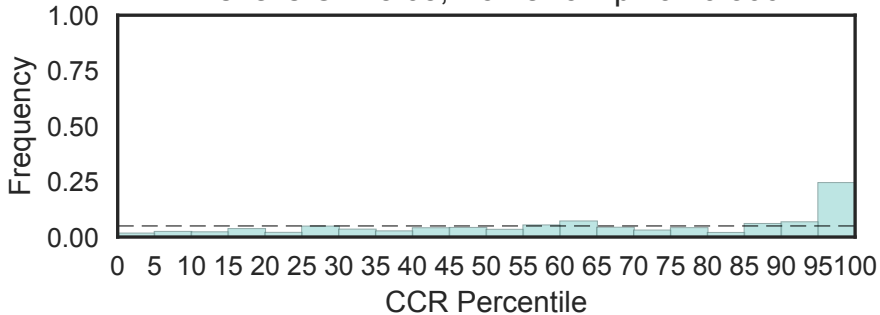

Late exocytosis, associated with Golgi transport  
(RSN1\_TM, N=3)

Fisher's OR: 0.886; Bonferroni p-val: 1

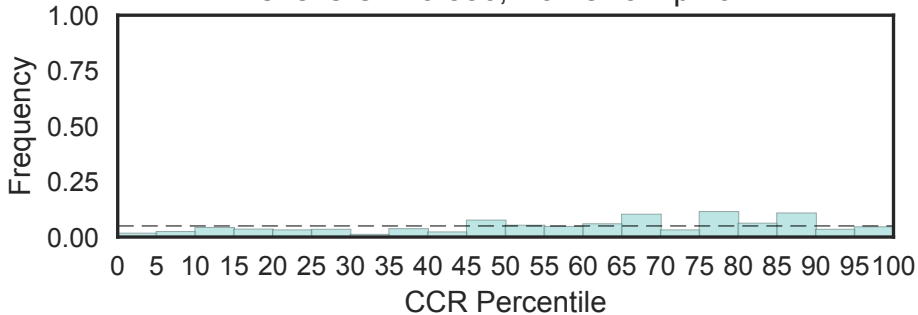

Arginine/Serine-Rich protein 1  
(RSRP, N=2)

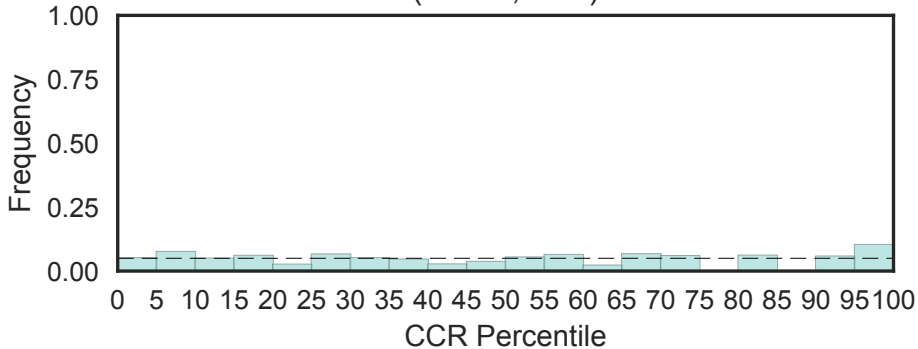

RNA 3'-terminal phosphate cyclase  
(RTC, N=3)

Fisher's OR: 0; Bonferroni p-val: 1

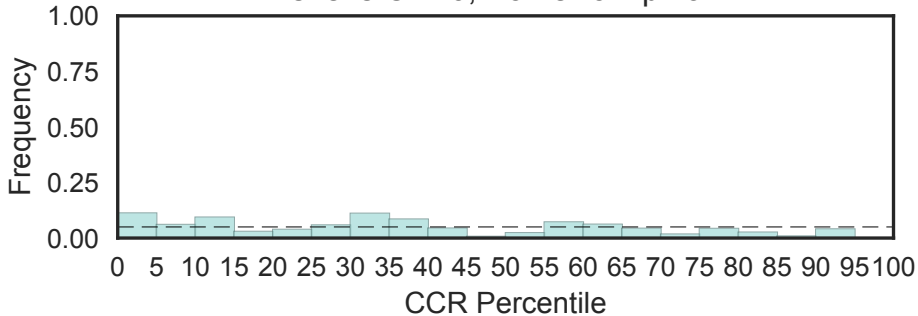

RNA 3'-terminal phosphate cyclase (RTC), insert domain  
(RTC\_insert, N=2)

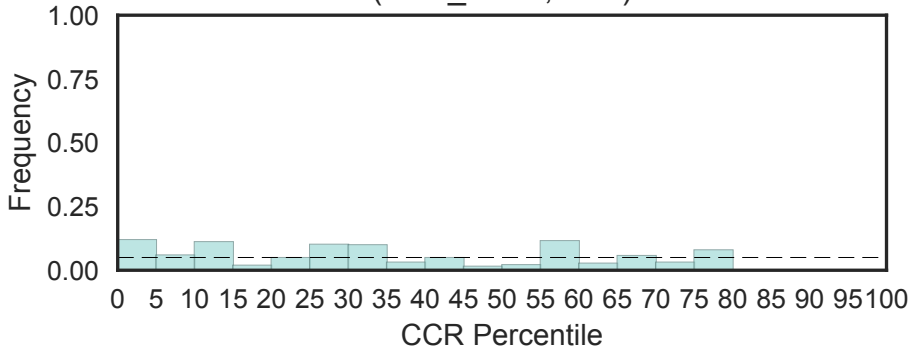

# Required for nuclear transport of RNA pol II C-terminus 1 (RTP1\_C1, N=1)

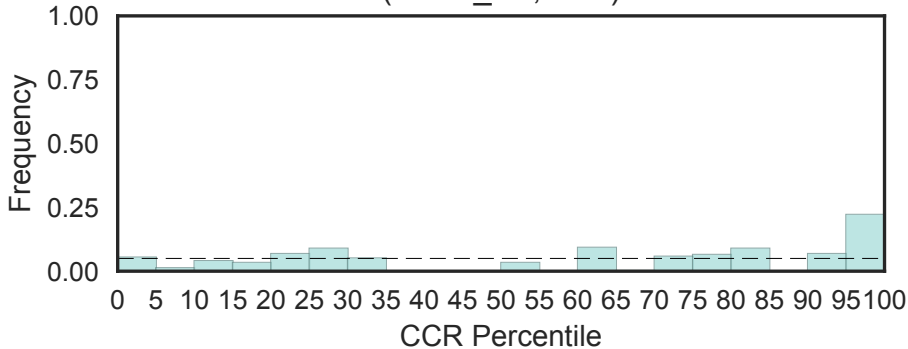

Required for nuclear transport of RNA pol II C-terminus 2  
(RTP1\_C2, N=1)

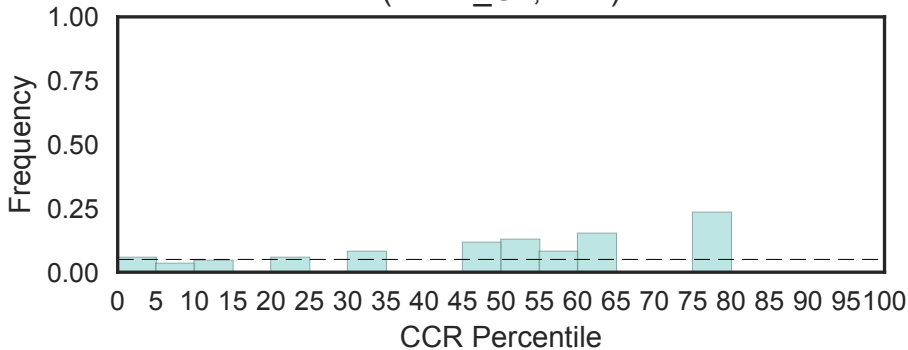

RTP801 C-terminal region  
(RTP801\_C, N=2)

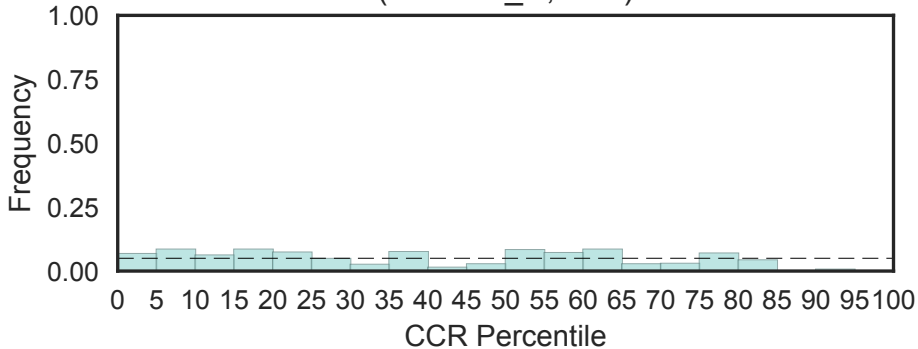



Regulator of Ty1 transposition protein 107 BRCT domain  
(RTT107\_BRCT\_5, N=3)

Fisher's OR: 0; Bonferroni p-val: 1

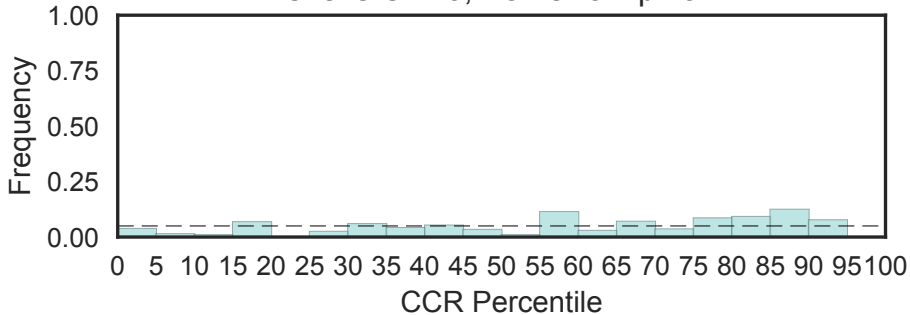

Rotatin, an armadillo repeat protein, centriole functioning  
(RTTN\_N, N=1)

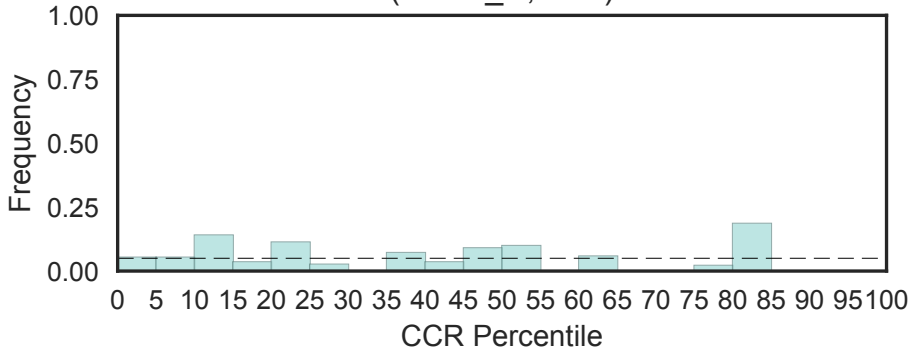

RUN domain  
(RUN, N=21)

Fisher's OR: 2.72; Bonferroni p-val: 0.847

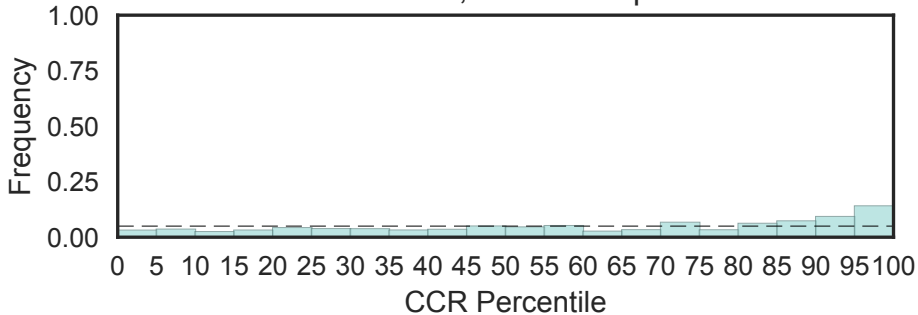

# Retroviral aspartyl protease (RVP, N=2)

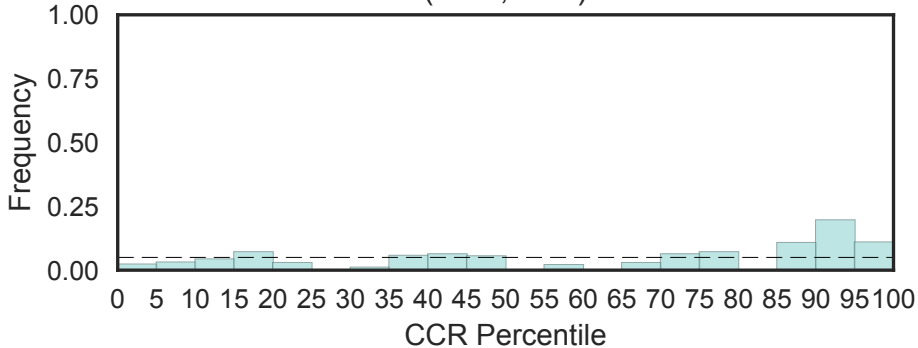

# Retroviral aspartyl protease (RVP\_2, N=2)

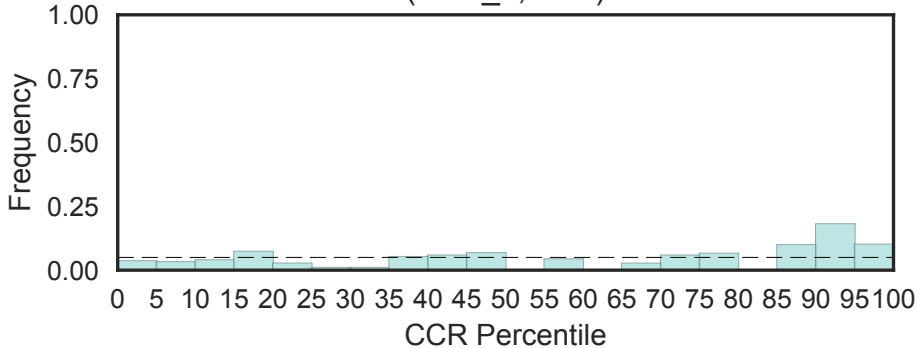

Reverse transcriptase (RNA-dependent DNA polymerase)  
(RVT\_1, N=1)

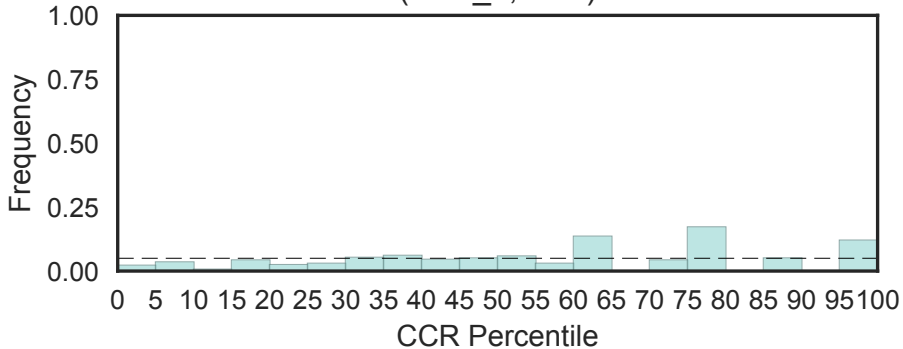

RWD domain  
(RWD, N=12)

Fisher's OR: 0.643; Bonferroni p-val: 1

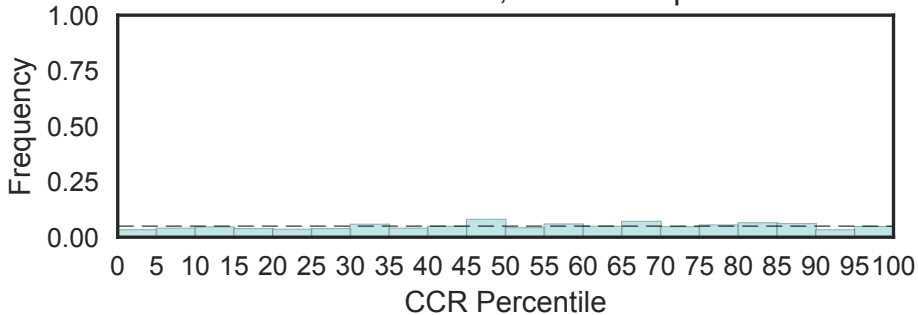

RIH domain  
(RYDR\_ITPR, N=12)  
Fisher's OR: 1.26; Bonferroni p-val: 1

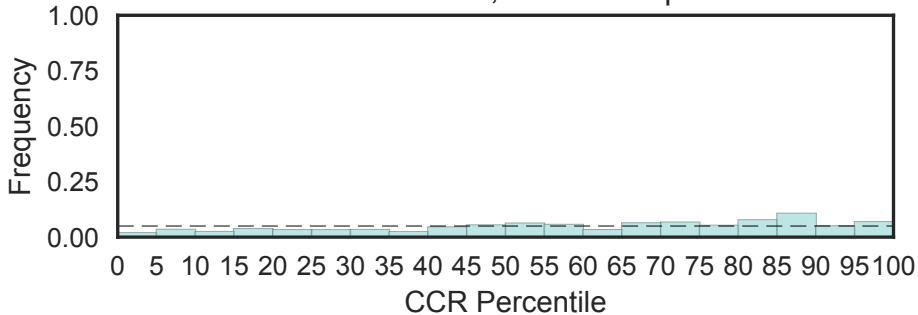



Rab15 effector  
(Rab15\_effector, N=1)

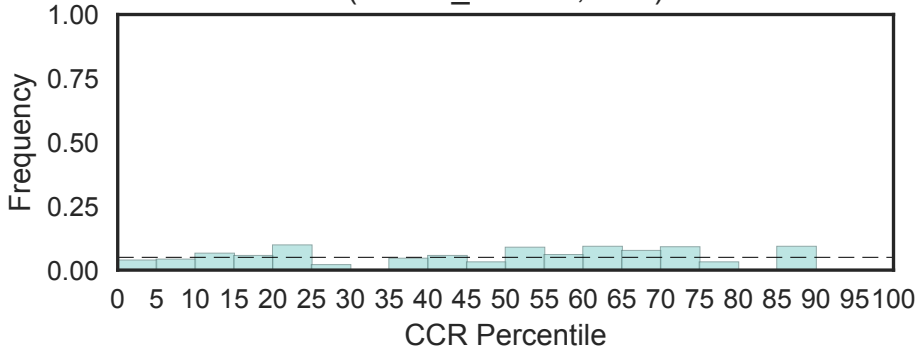

Rab3 GTPase-activating protein catalytic subunit  
(Rab3-GTPase\_cat, N=1)

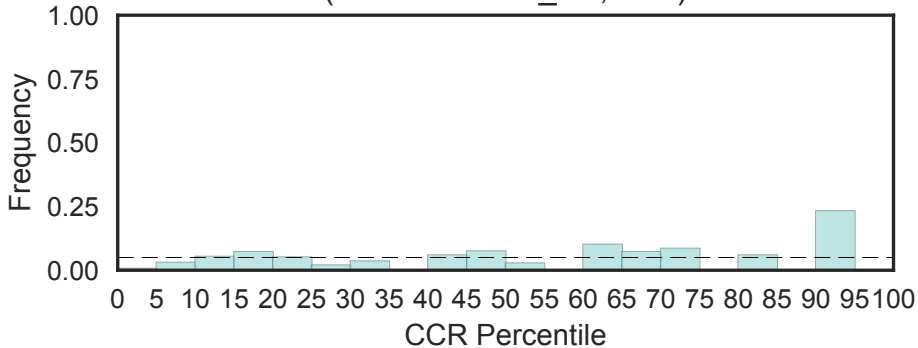

Rabaptin-like protein  
(Rab5-bind, N=3)

Fisher's OR: 0.569; Bonferroni p-val: 1

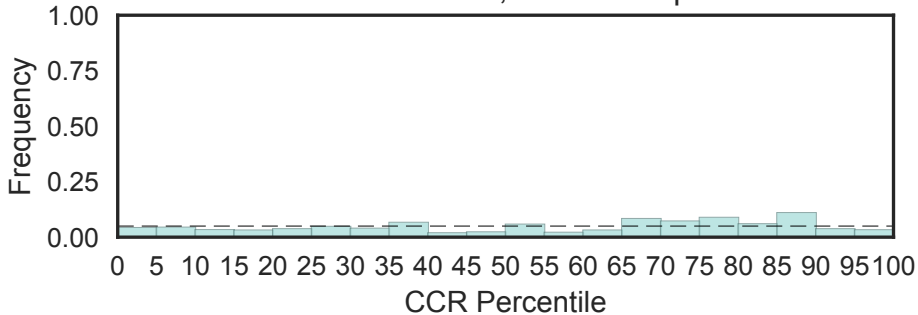

Rab5-interacting protein (Rab5ip)  
(Rab5ip, N=3)

Fisher's OR: 0; Bonferroni p-val: 1

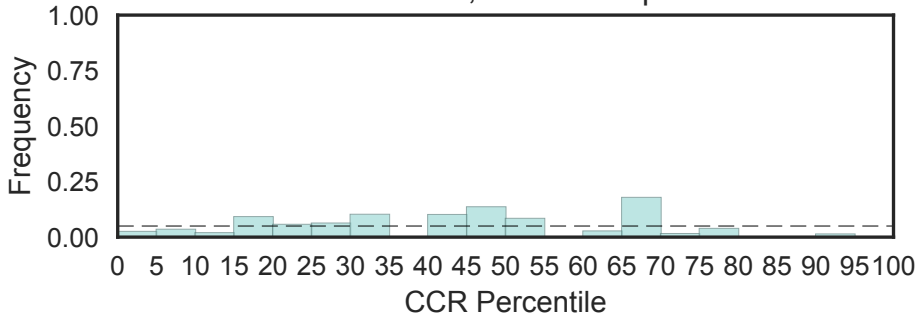

Rab-GTPase-TBC domain  
(RabGAP-TBC, N=51)

Fisher's OR: 0.892; Bonferroni p-val: 1

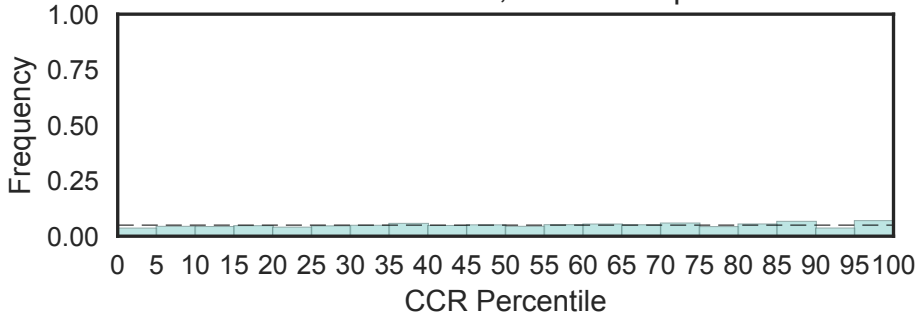

Rab geranylgeranyl transferase alpha-subunit, insert domain  
(RabGGT\_insert, N=1)

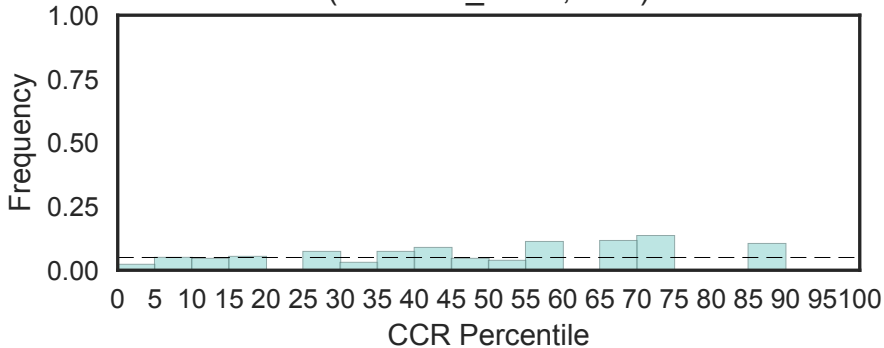

Rab effector MyRIP/melanophilin C-terminus  
(Rab\_eff\_C, N=2)

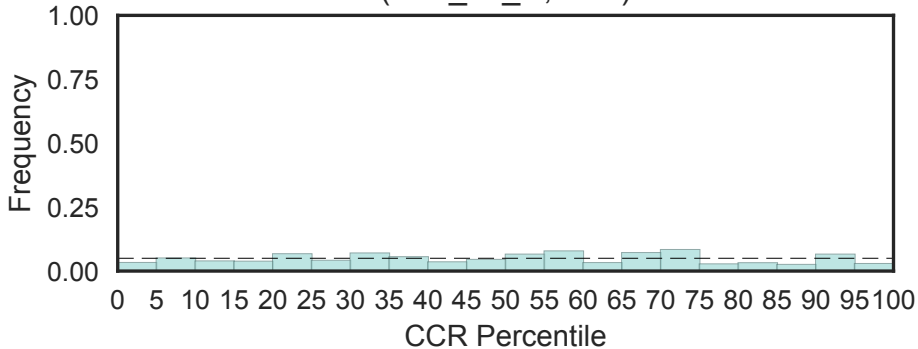

Rabaptin  
(Rabaptin, N=2)

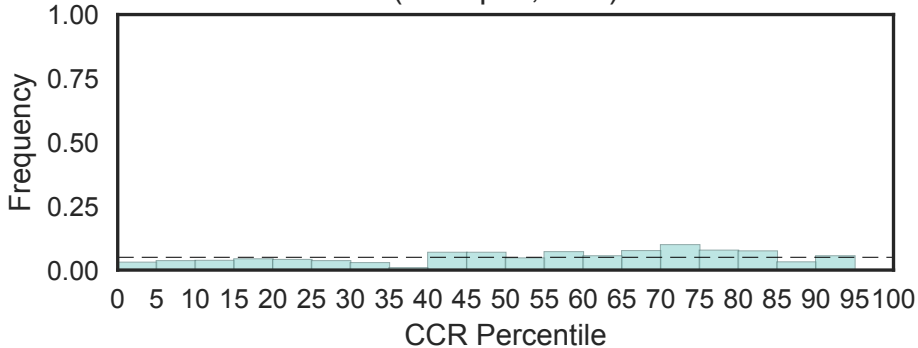



Repair protein Rad1/Rec1/Rad17  
(Rad1, N=2)

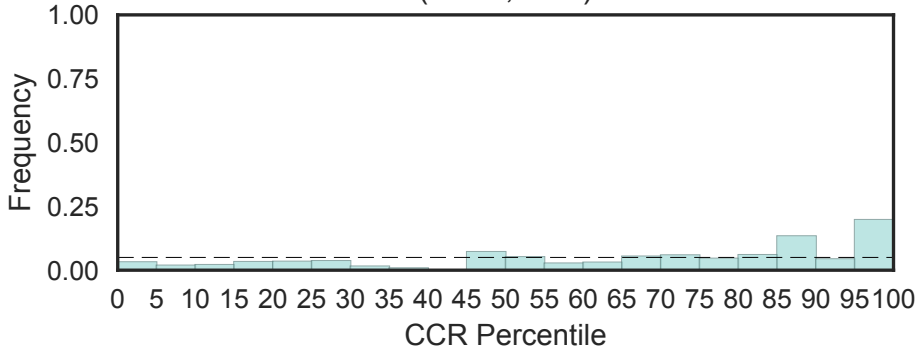

Binding domain of DNA repair protein Ercc1 (rad10/Swi10)  
(Rad10, N=1)

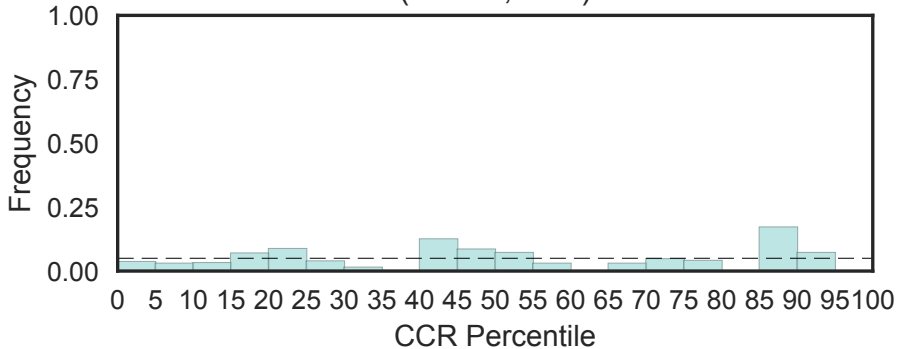

Rad17 cell cycle checkpoint protein  
(Rad17, N=4)

Fisher's OR: 0; Bonferroni p-val: 1

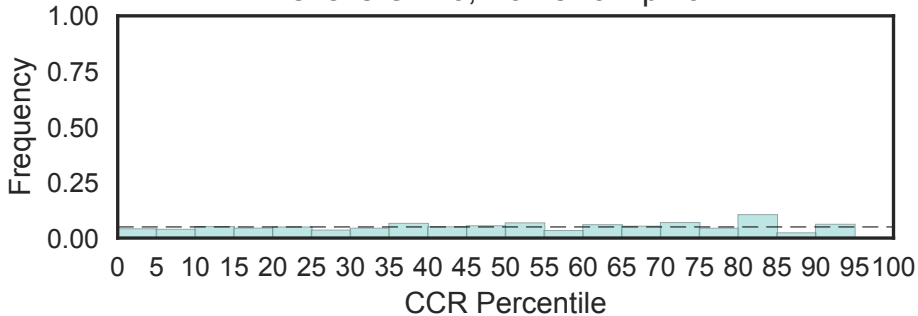

Conserved region of Rad21 / Rec8 like protein  
(Rad21\_Rec8, N=3)

Fisher's OR: 0; Bonferroni p-val: 1

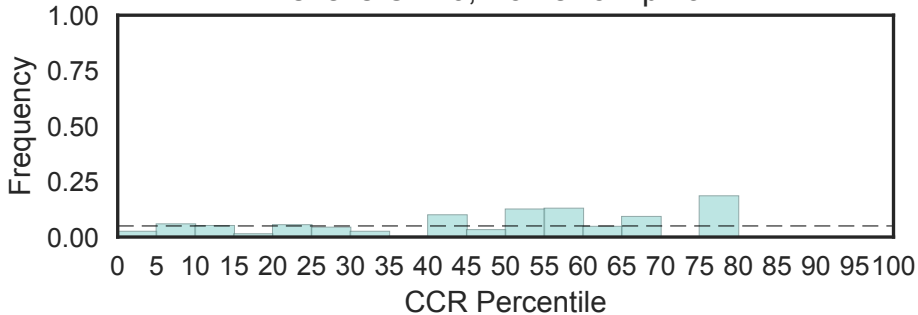

N terminus of Rad21 / Rec8 like protein  
(Rad21\_Rec8\_N, N=3)

Fisher's OR: 6.09; Bonferroni p-val: 1

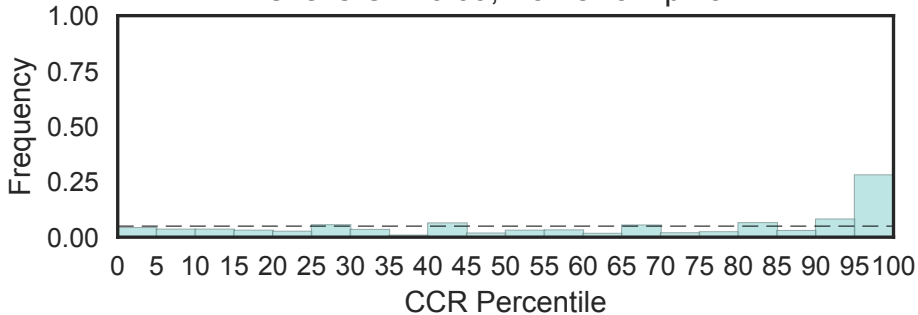

Rad4 transglutaminase-like domain  
(Rad4, N=2)

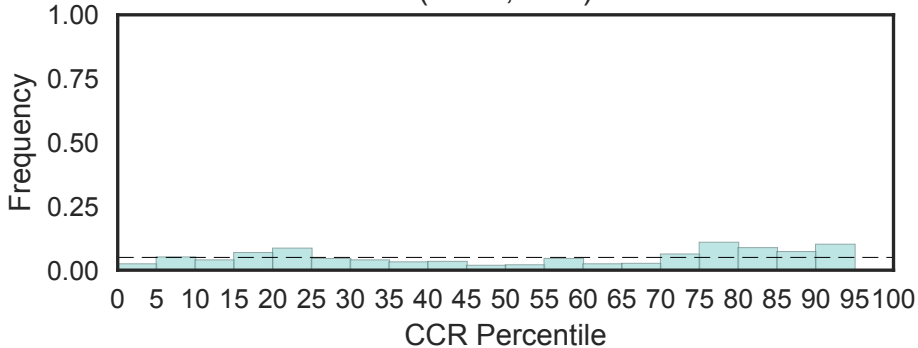

Rad50 zinc hook motif  
(Rad50\_zn\_hook, N=1)

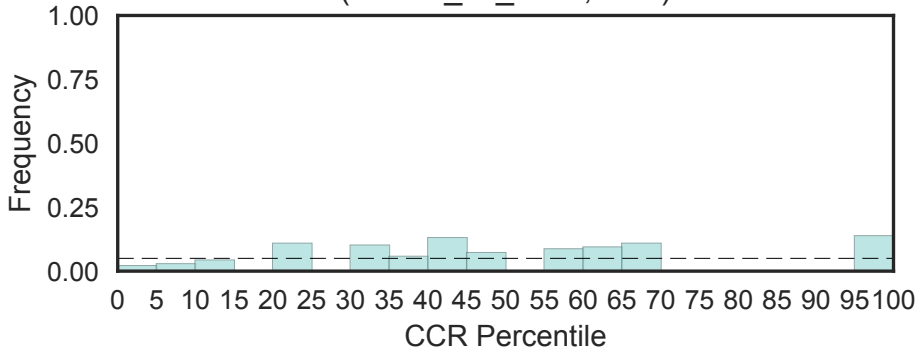

Rad51  
(Rad51, N=9)

Fisher's OR: 0.551; Bonferroni p-val: 1

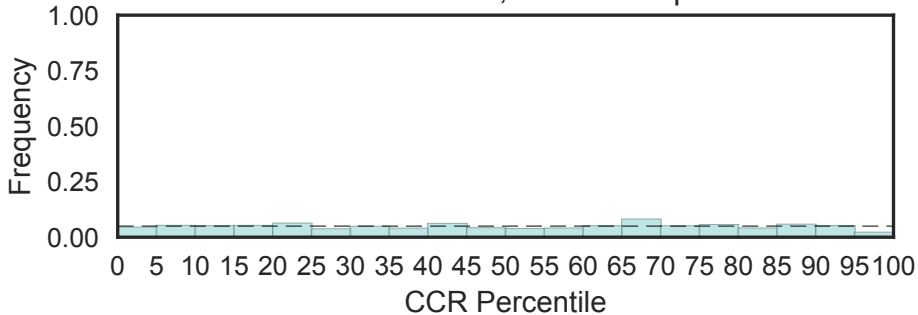



Rad52/22 family double-strand break repair protein  
(Rad52\_Rad22, N=2)

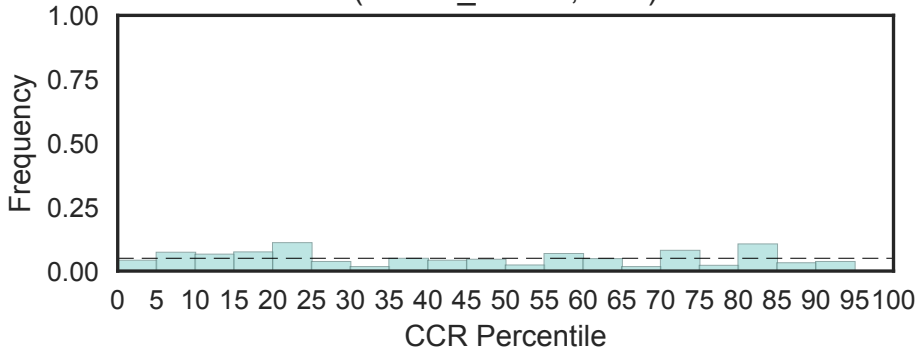

Ubiquitin-2 like Rad60 SUMO-like  
(Rad60-SLD, N=32)

Fisher's OR: 3.02; Bonferroni p-val: 1

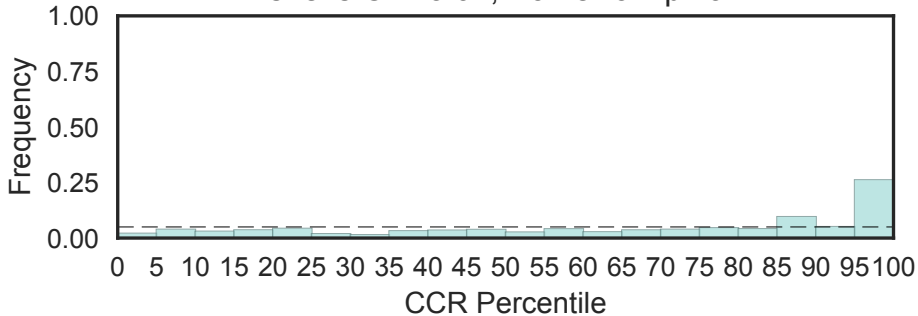

Ubiquitin-2 like Rad60 SUMO-like  
(Rad60-SLD\_2, N=21)

Fisher's OR: 4.07; Bonferroni p-val: 0.833

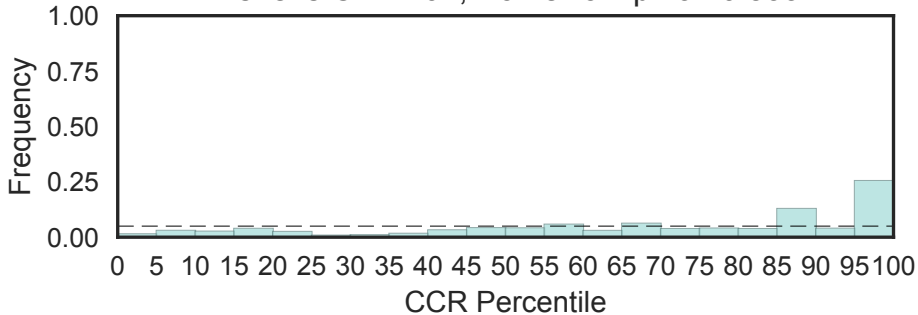

Rad9  
(Rad9, N=3)

Fisher's OR: 1.9; Bonferroni p-val: 1

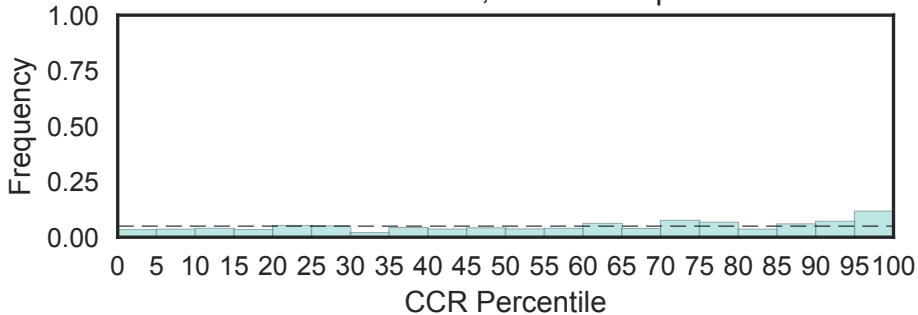

Radial spokehead-like protein  
(Radial\_spoke, N=3)  
Fisher's OR: 0; Bonferroni p-val: 1

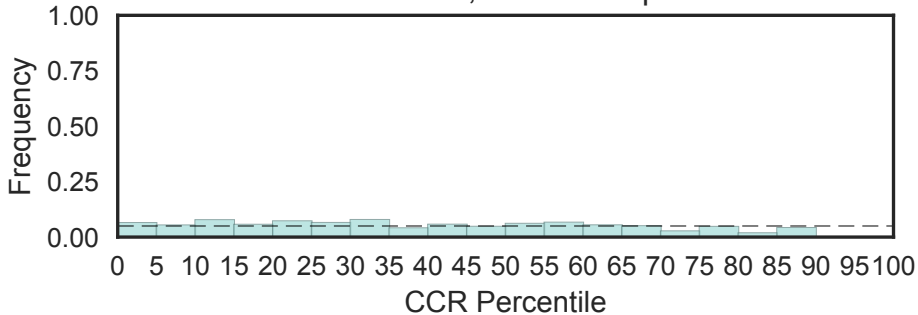

Radial spoke protein 3  
(Radial\_spoke\_3, N=1)

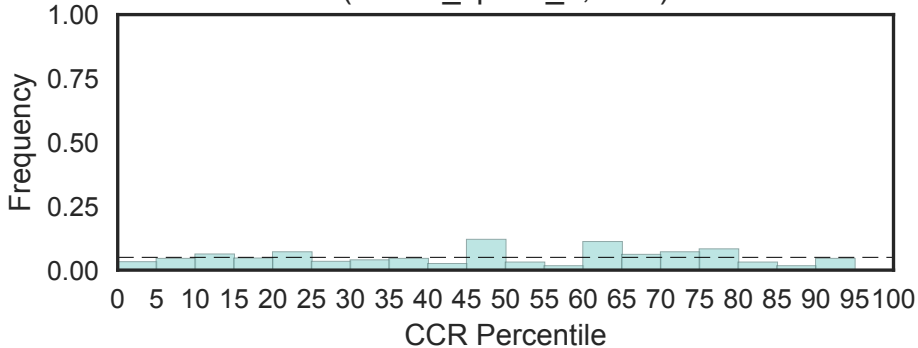

Radical SAM superfamily  
(Radical\_SAM, N=10)

Fisher's OR: 0.207; Bonferroni p-val: 1

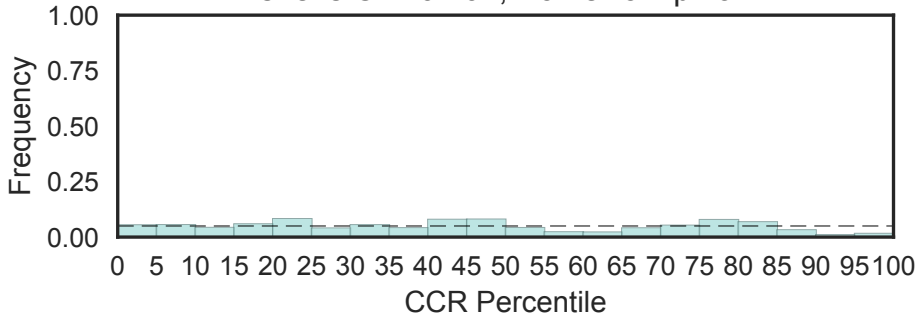

Radical\_SAM C-terminal domain  
(Radical\_SAM\_C, N=1)

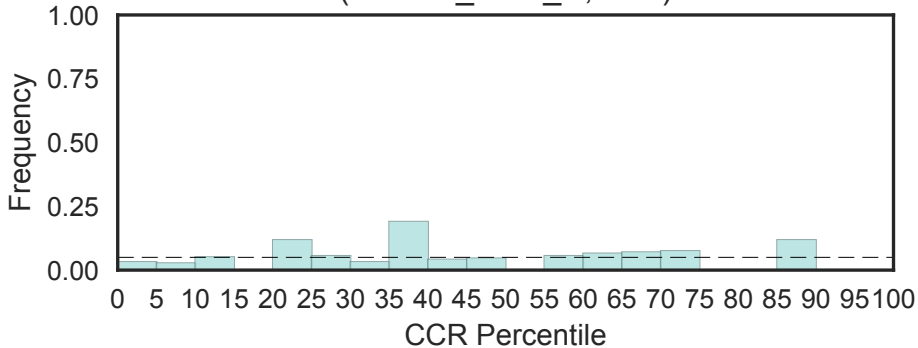



# Raftlin

(Raftlin, N=2)

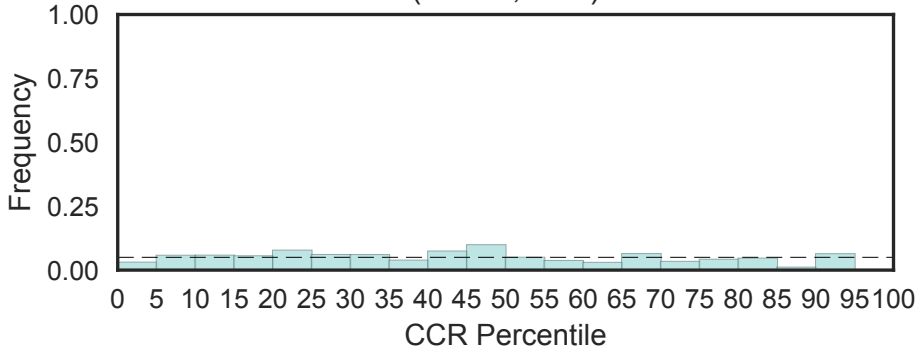

RanGAP1 C-terminal domain  
(RanGAP1\_C, N=1)

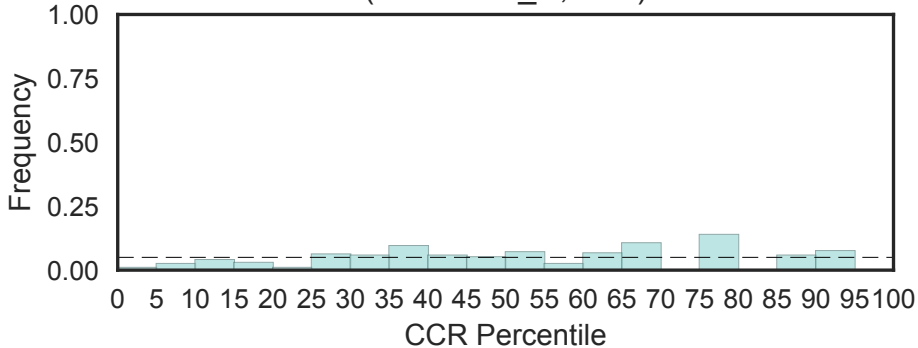

RanBP1 domain  
(Ran\_BP1, N=22)

Fisher's OR: 1.17; Bonferroni p-val: 1

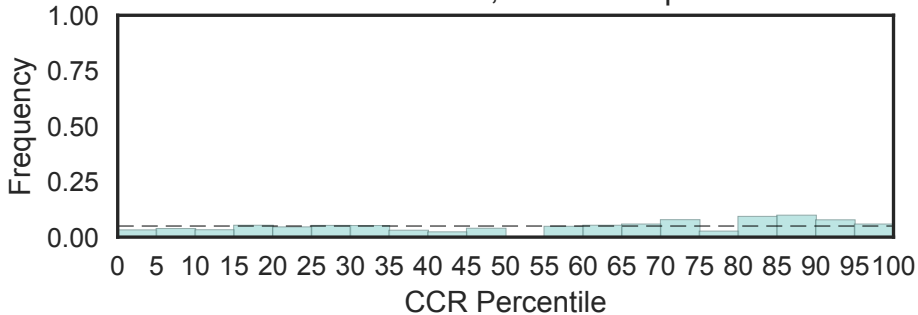

Rap/ran-GAP  
(Rap\_GAP, N=10)

Fisher's OR: 1.37; Bonferroni p-val: 1

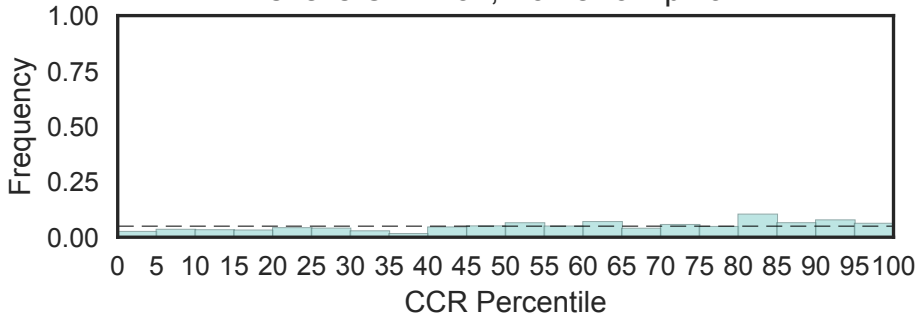

# Rapsyn N-terminal myristoylation and linker region (Rapsyn\_N, N=1)

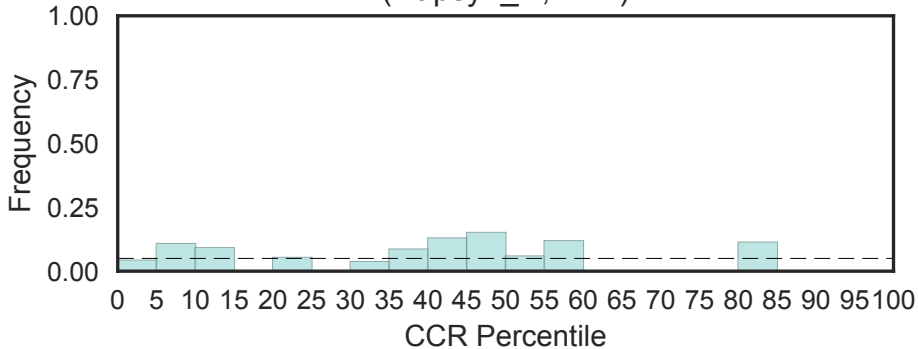

Raptor N-terminal CASPase like domain  
(Raptor\_N, N=1)

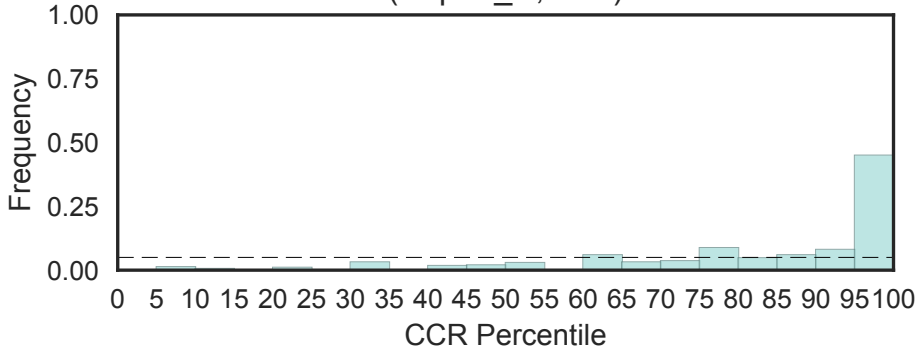

Ras family  
(Ras, N=174)

Fisher's OR: 2.52; Bonferroni p-val: 1.23e-21

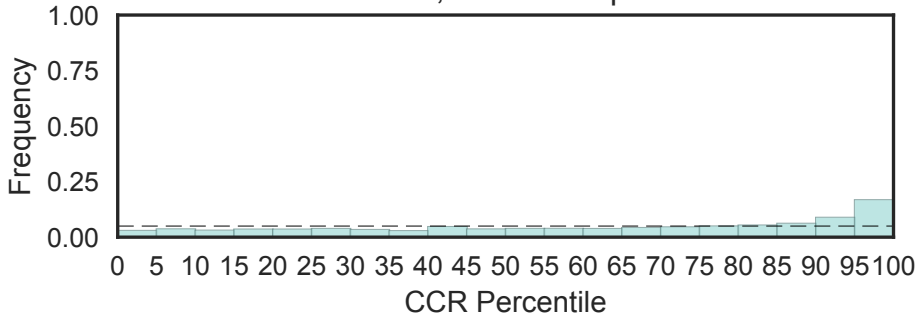

GTPase-activator protein for Ras-like GTPase  
(RasGAP, N=20)

Fisher's OR: 0.955; Bonferroni p-val: 1

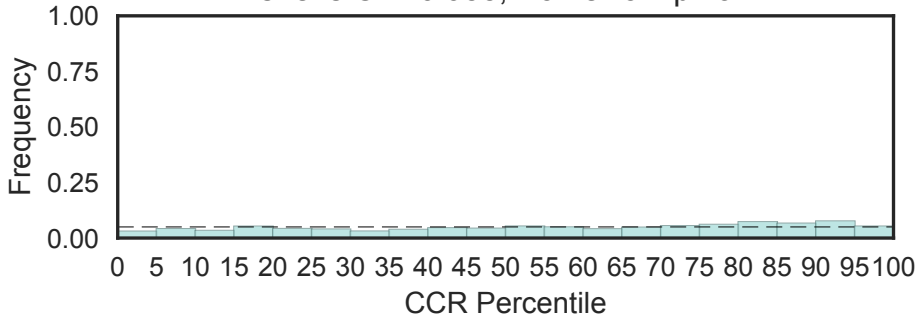



RasGAP C-terminus  
(RasGAP\_C, N=3)

Fisher's OR: 0; Bonferroni p-val: 1

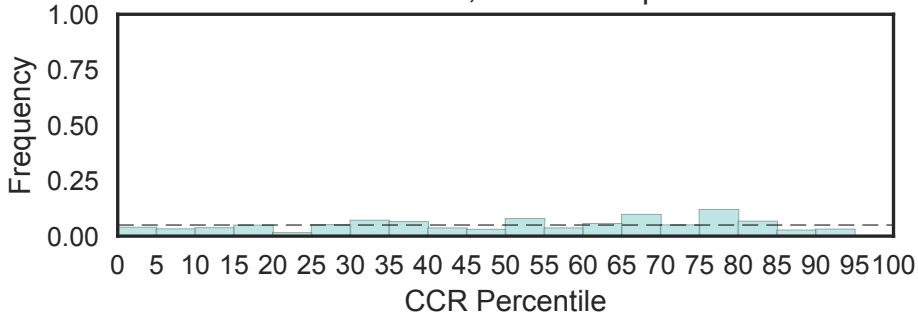

RasGEF domain  
(RasGEF, N=32)

Fisher's OR: 1.79; Bonferroni p-val: 1

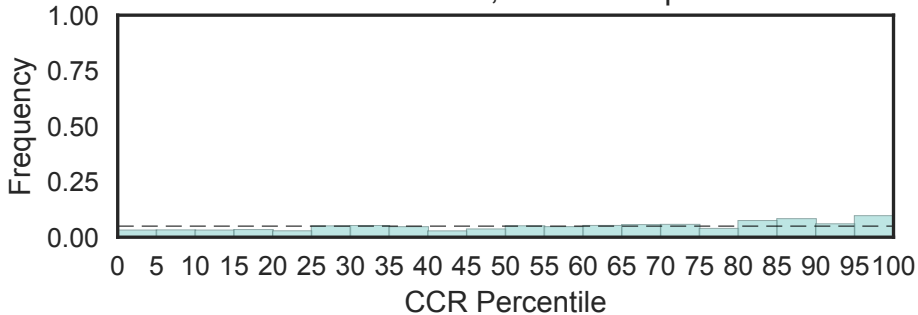

RasGEF N-terminal motif  
(RasGEF\_N, N=21)

Fisher's OR: 1.25; Bonferroni p-val: 1

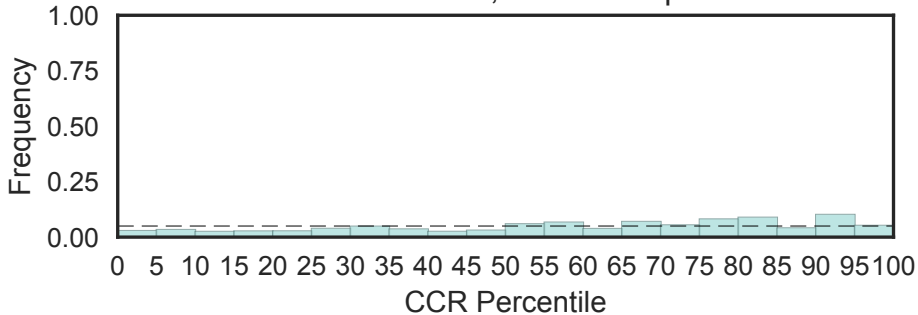

# Rapamycin-insensitive companion of mTOR RasGEF\_N domain (RasGEF\_N\_2, N=1)

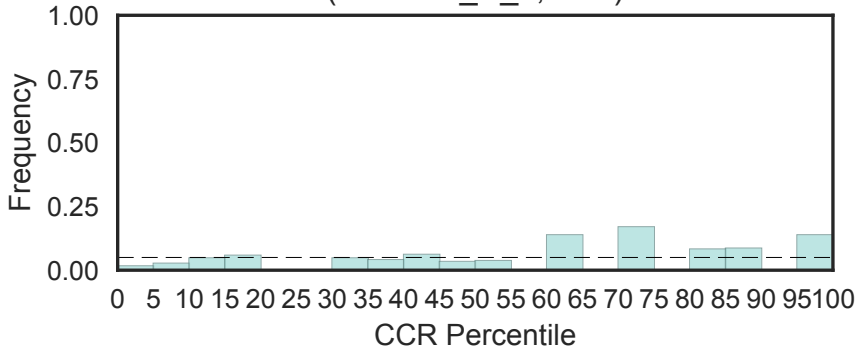

RAVE protein 1 C terminal  
(Rav1p\_C, N=4)

Fisher's OR: 1.18; Bonferroni p-val: 1

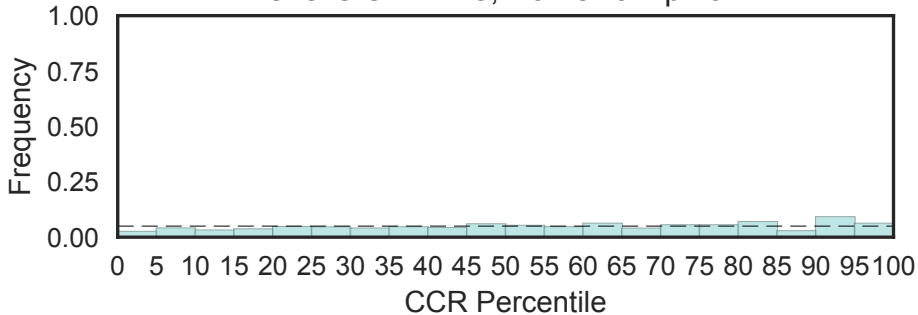

Rb C-terminal domain  
(Rb\_C, N=2)

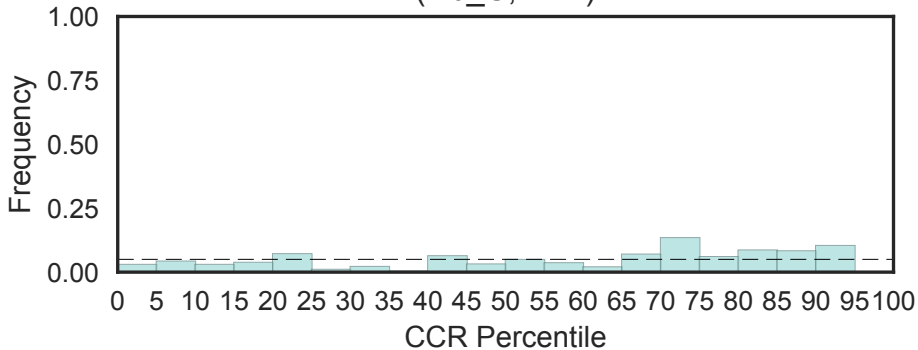

RbsD / FucU transport protein family  
(RbsD\_FucU, N=1)

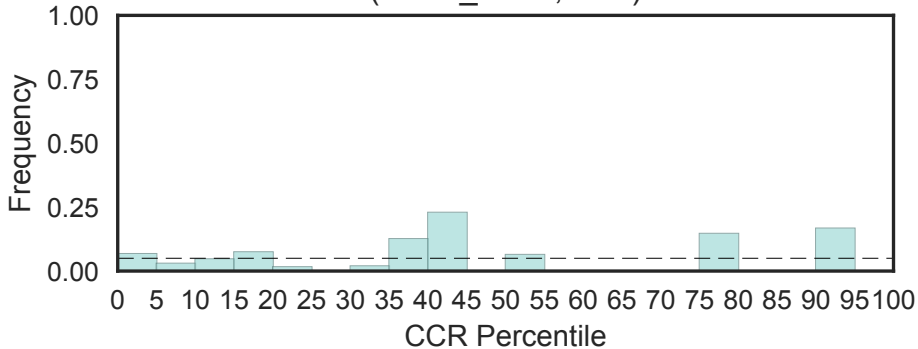

Rabenosyn Rab binding domain  
(Rbsn, N=2)

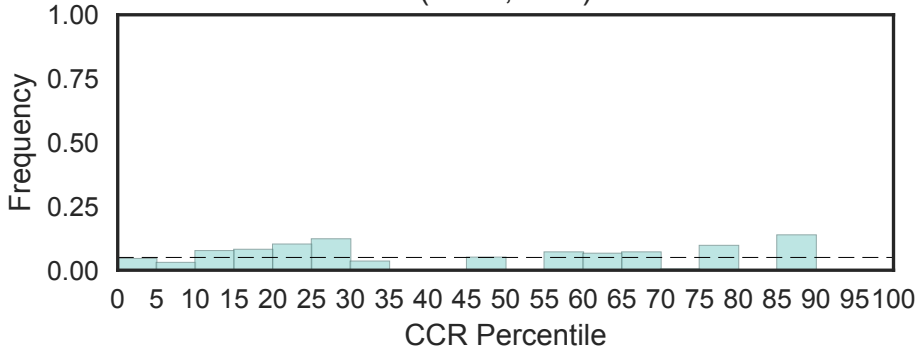



Cell differentiation family, Rcd1-like  
(Rcd1, N=1)

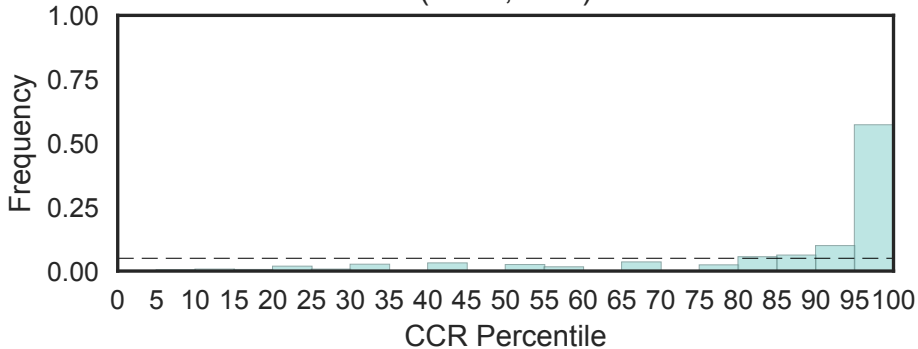

Rdx family  
(Rdx, N=5)

Fisher's OR: 0.663; Bonferroni p-val: 1

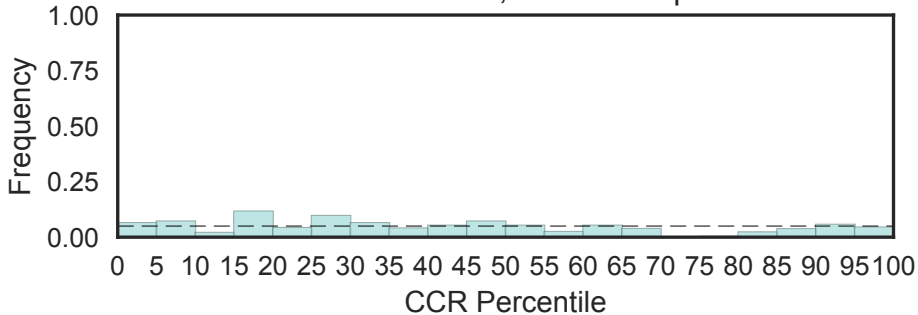

recA bacterial DNA recombination protein  
(RecA, N=3)

Fisher's OR: 2.38; Bonferroni p-val: 1

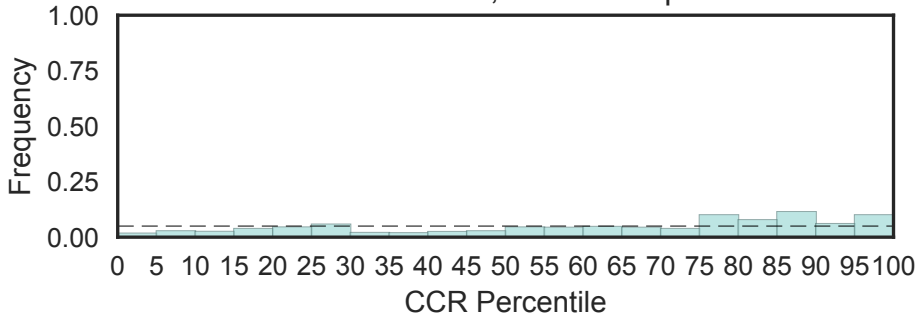

RecQ helicase protein-like 5 (RecQ5)  
(RecQ5, N=1)

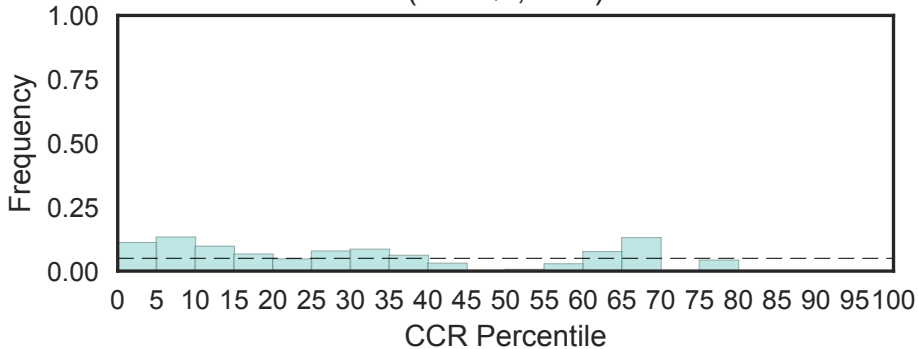

RecQ zinc-binding  
(RecQ\_Zn\_bind, N=6)  
Fisher's OR: 0; Bonferroni p-val: 1

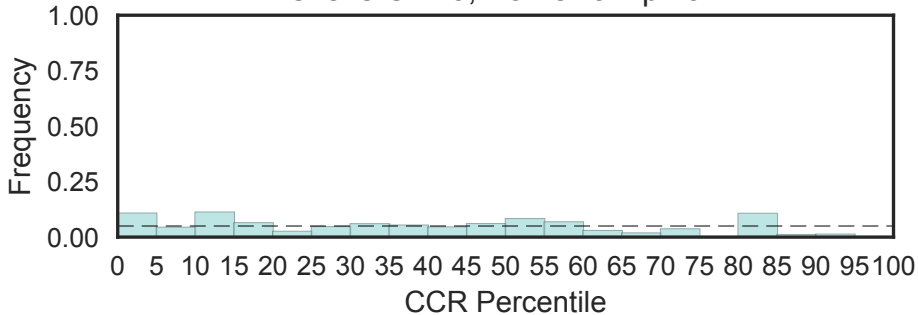

Receptor L domain  
(Recep\_L\_domain, N=14)  
Fisher's OR: 0.382; Bonferroni p-val: 1

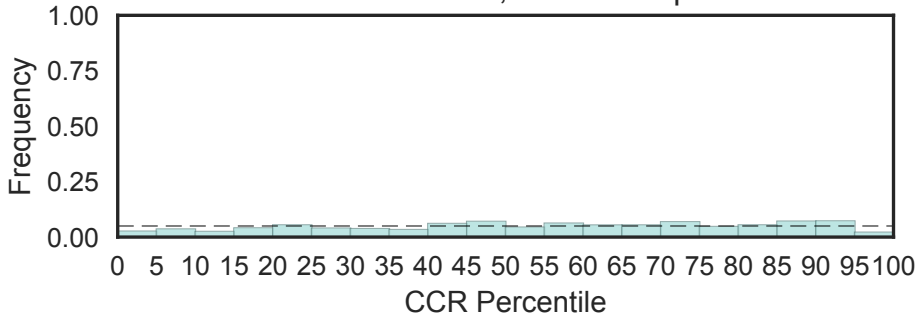

Natural killer cell receptor 2B4  
(Receptor\_2B4, N=2)

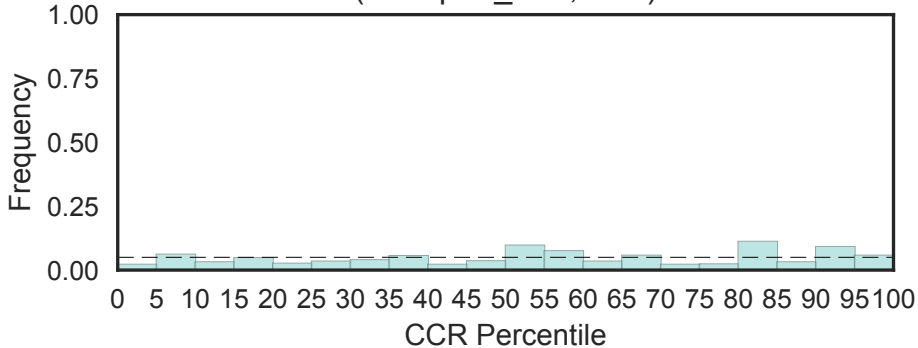

Protein-tyrosine phosphatase receptor IA-2  
(Receptor\_IA-2, N=2)

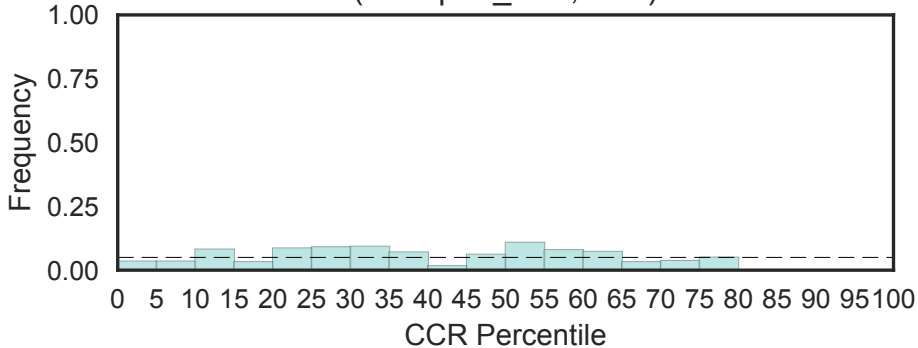



Redoxin  
(Redoxin, N=5)

Fisher's OR: 0.363; Bonferroni p-val: 1

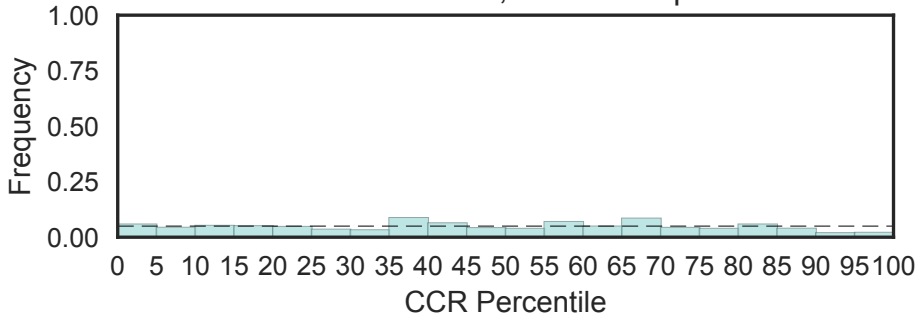

Reductase C-terminal  
(Reductase\_C, N=1)

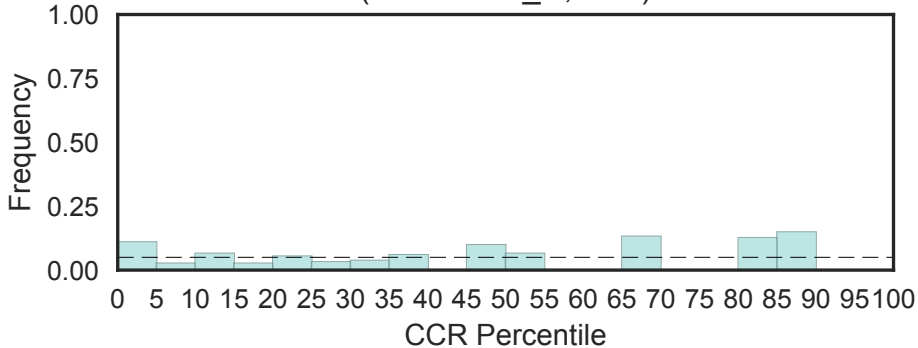

Reeler domain  
(Reeler, N=2)

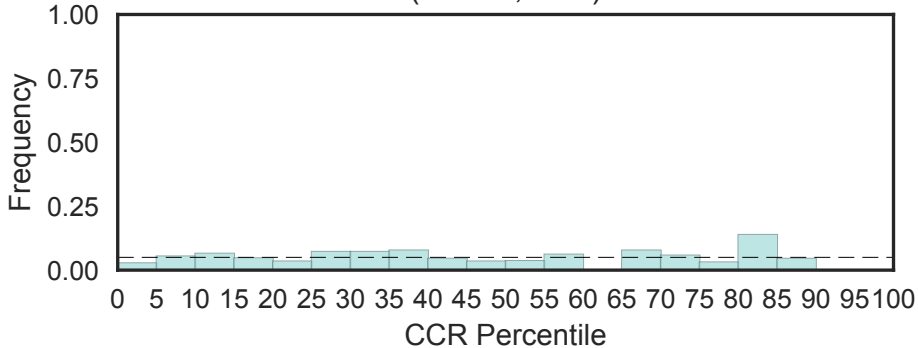

RelB leucine zipper  
(RelB\_leu\_zip, N=1)

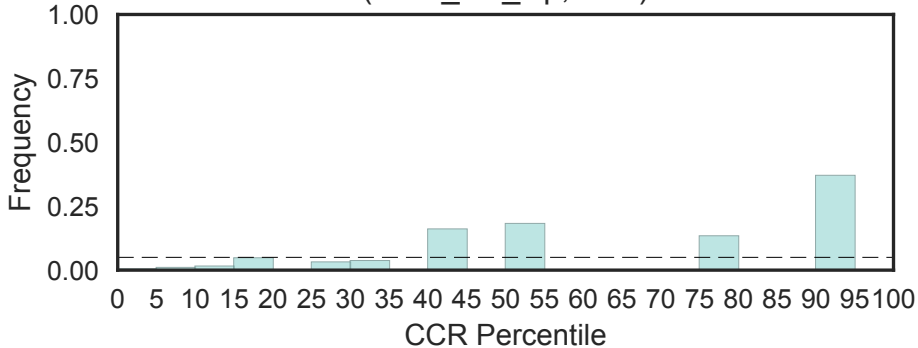

RelB transactivation domain  
(RelB\_transactiv, N=1)

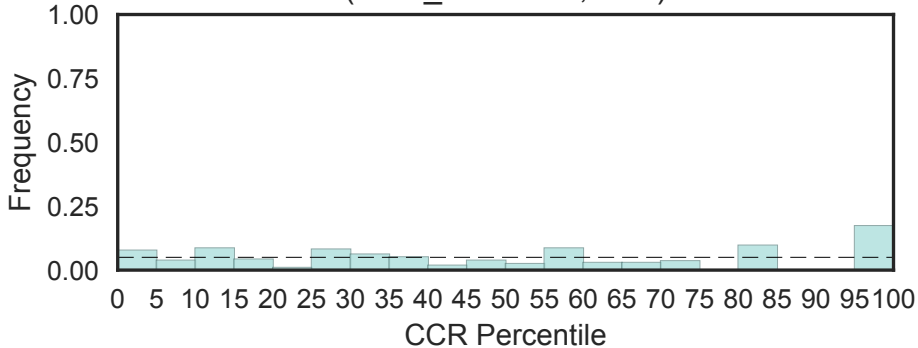

Replication factor-A protein 1, N-terminal domain  
(Rep-A\_N, N=1)

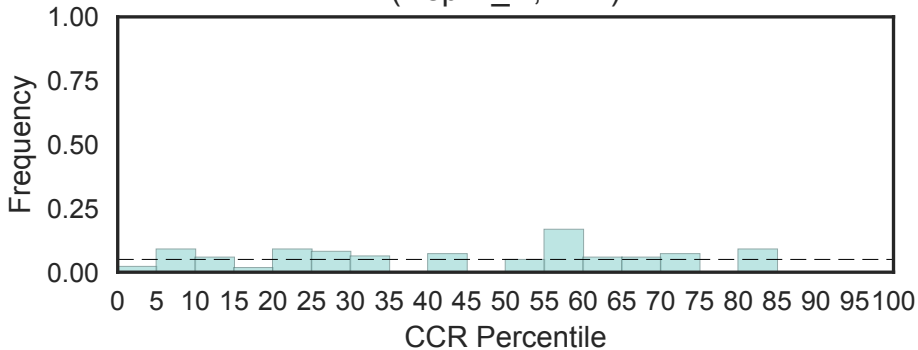

Replication factor A protein 3  
(Rep\_fac-A\_3, N=1)

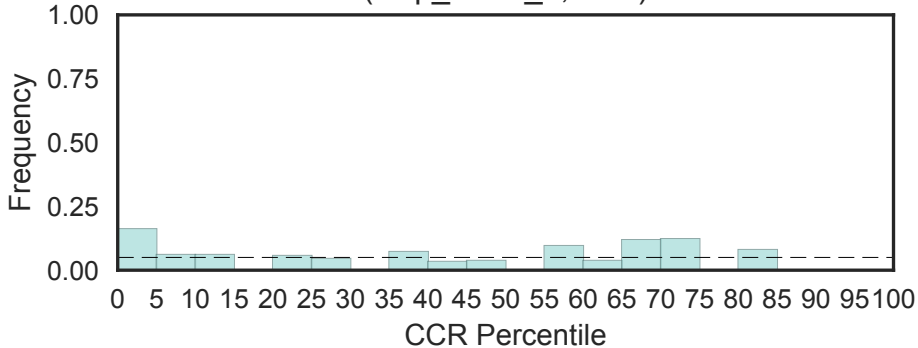

Replication factor-A C terminal domain  
(Rep\_fac-A\_C, N=2)

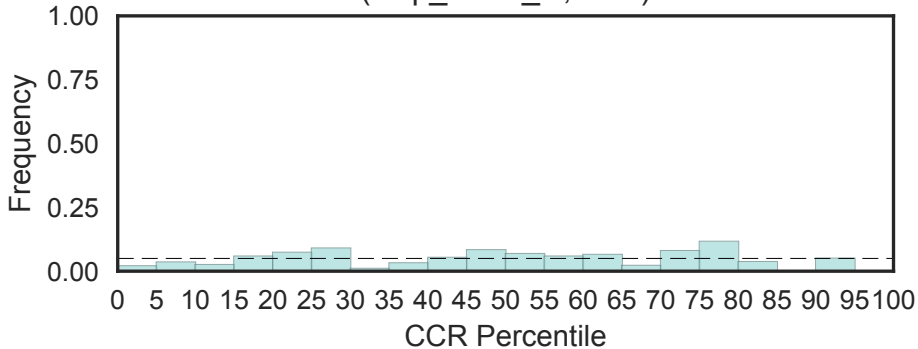



Replication factor C C-terminal domain  
(Rep\_fac\_C, N=3)

Fisher's OR: 0; Bonferroni p-val: 1

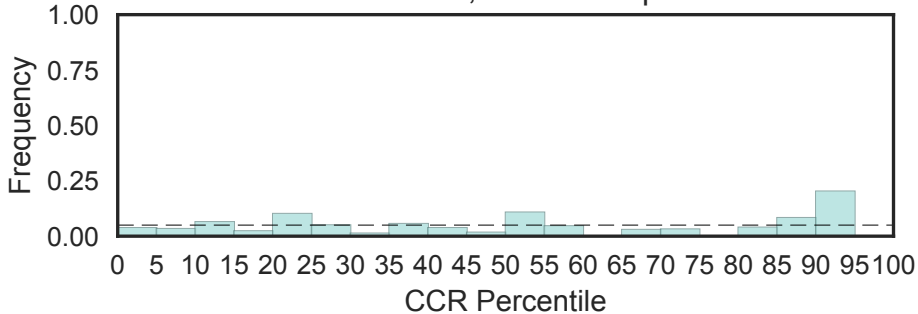

Reprolysin (M12B) family zinc metalloprotease  
(Reprolysin, N=40)

Fisher's OR: 0.675; Bonferroni p-val: 1

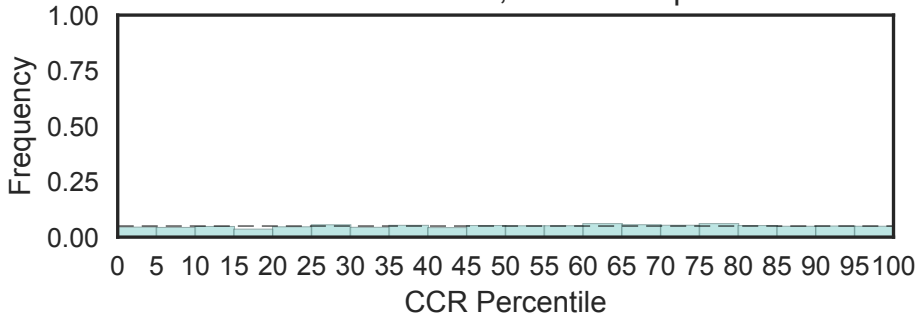

Metallo-peptidase family M12B Reprolysin-like  
(Reprolysin\_2, N=22)

Fisher's OR: 1.29; Bonferroni p-val: 1

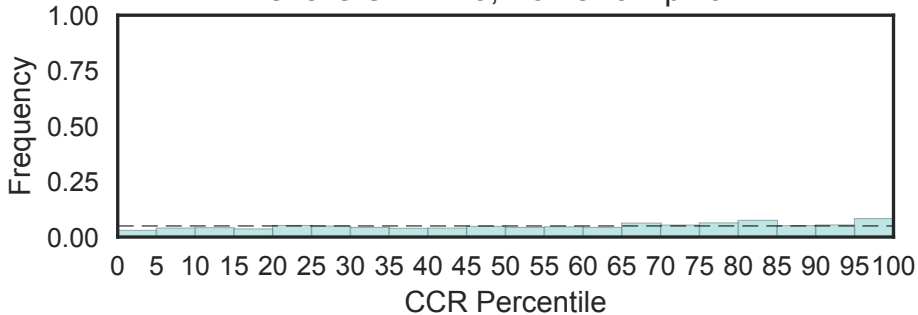

Metallo-peptidase family M12B Reprolysin-like  
(Reprolysin\_3, N=38)

Fisher's OR: 0.797; Bonferroni p-val: 1

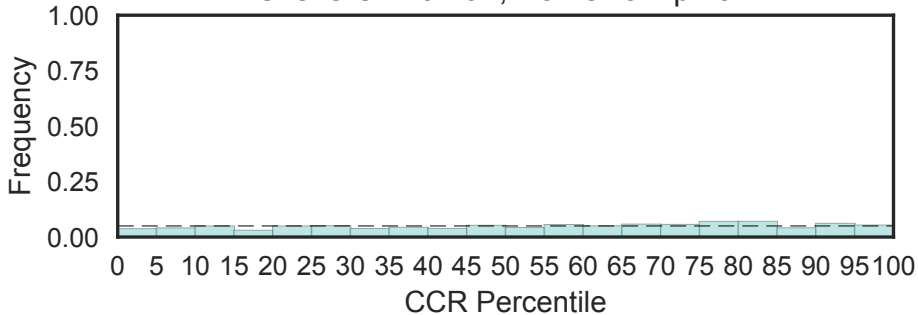

Metallo-peptidase family M12B Reprolysin-like  
(Reprolysin\_4, N=22)

Fisher's OR: 1.16; Bonferroni p-val: 1

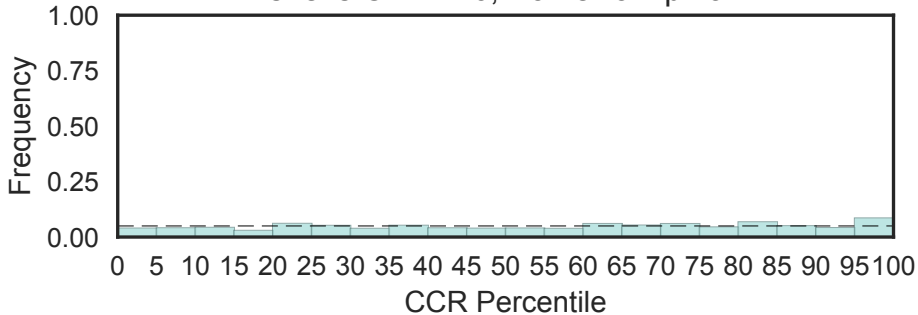

# Metallo-peptidase family M12

(Reprolysin\_5, N=36)

Fisher's OR: 0.757; Bonferroni p-val: 1

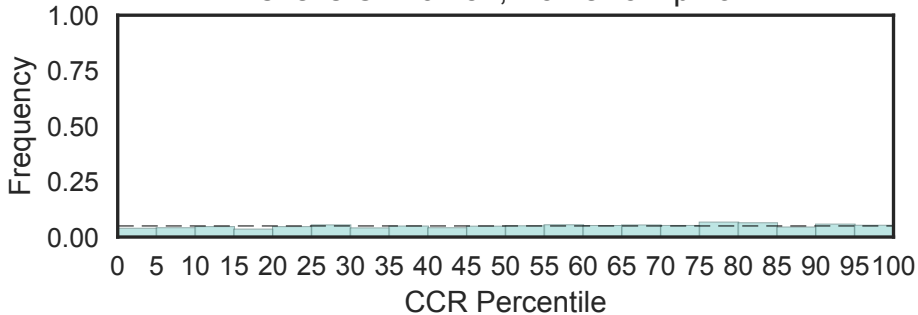

N-terminal domain of DPF2/REQ.  
(Requiem\_N, N=3)  
Fisher's OR: 6.24; Bonferroni p-val: 1

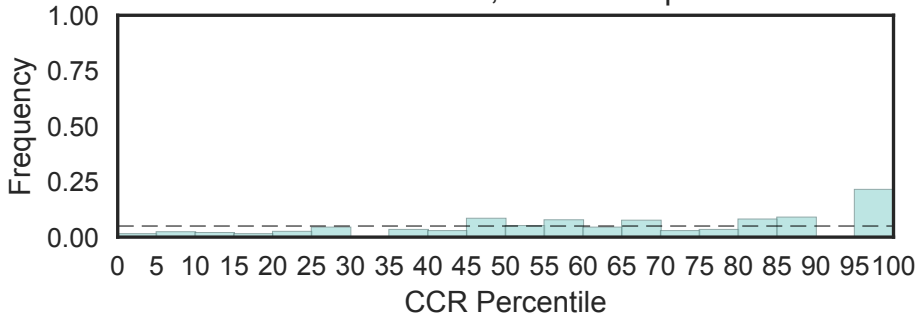

Rer1 family  
(Rer1, N=1)

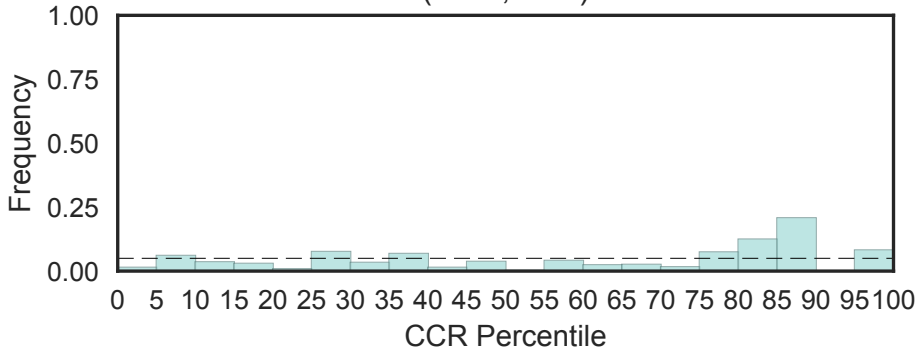



Type III restriction enzyme, res subunit  
(ResIII, N=64)

Fisher's OR: 3.79; Bonferroni p-val: 1.19e-23

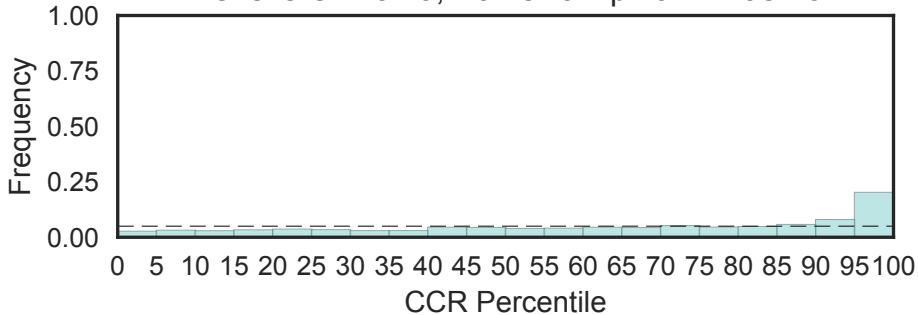

# Resistin

(Resistin, N=2)

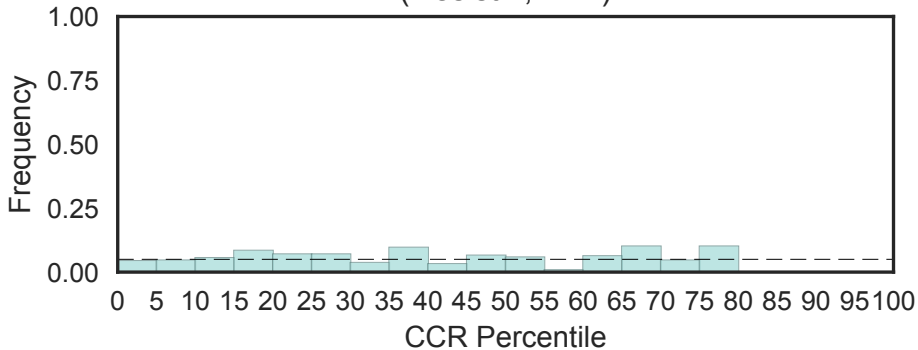

# Reticulon

(Reticulon, N=4)

Fisher's OR: 0.553; Bonferroni p-val: 1

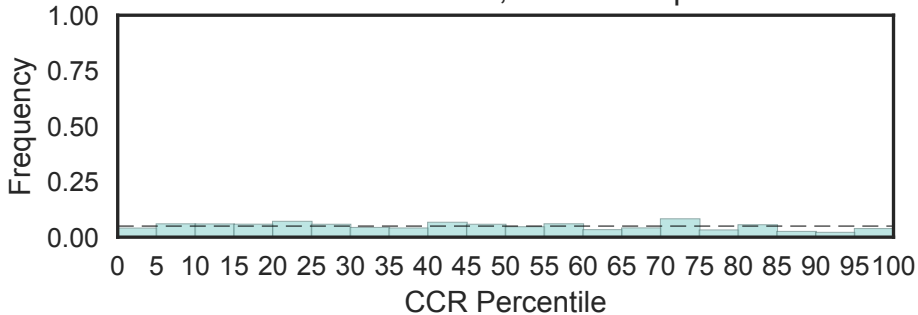

Retinal protein  
(Retinal, N=1)

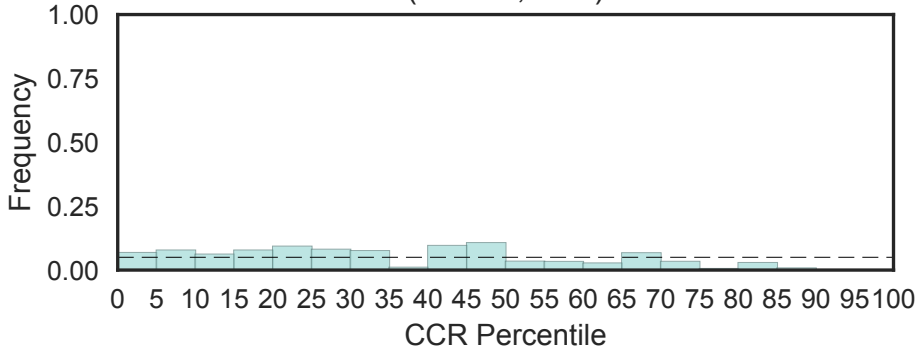

Retrotransposon gag protein  
(Retrotrans\_gag, N=3)  
Fisher's OR: 0; Bonferroni p-val: 1

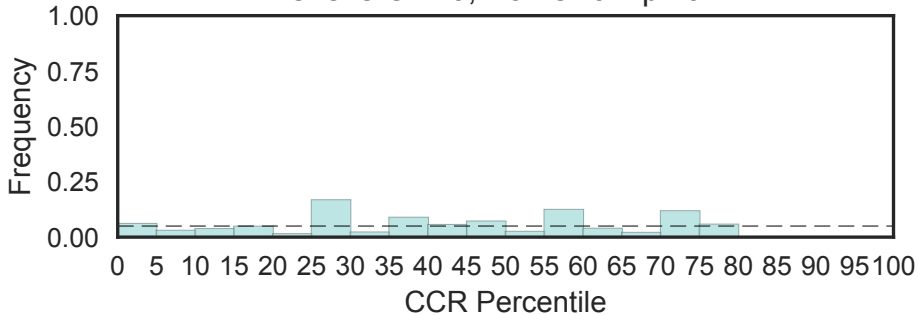

Rft protein  
(Rft-1, N=1)

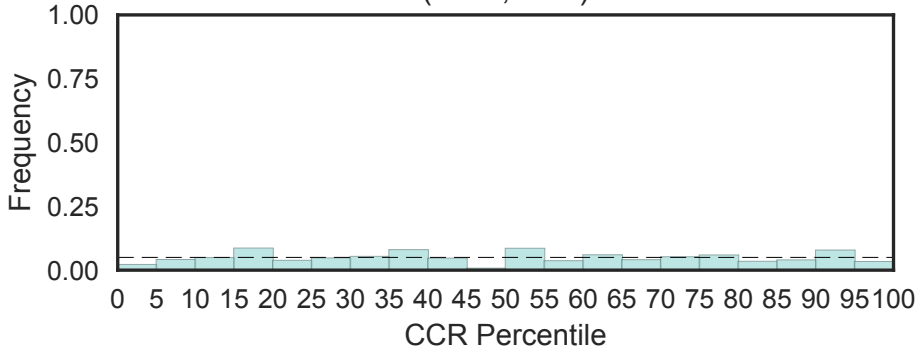

Rgp1  
(Rgp1, N=2)

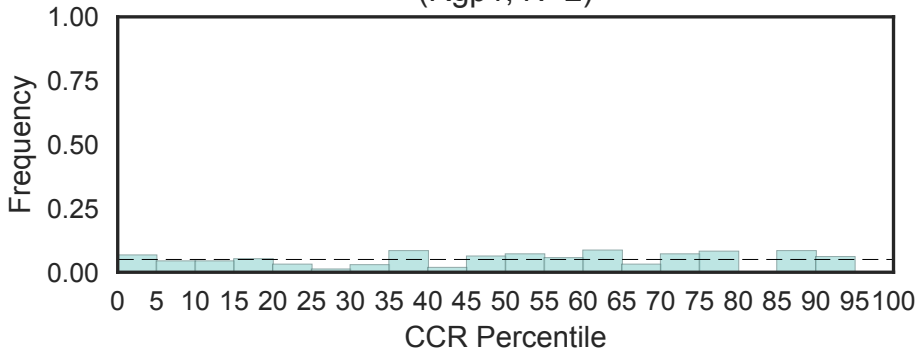

RhoGAP domain  
(RhoGAP, N=62)

Fisher's OR: 1.13; Bonferroni p-val: 1

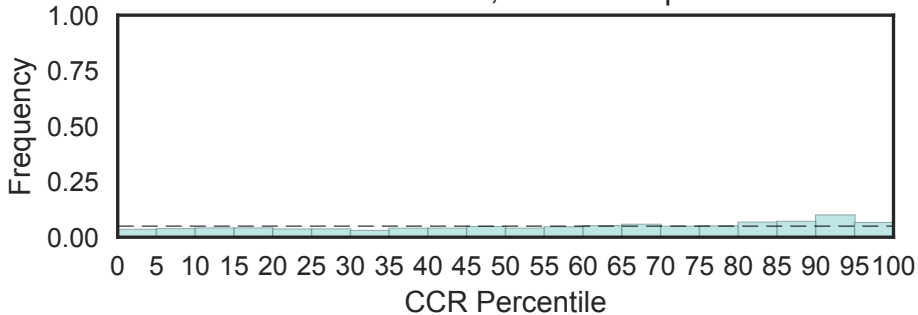



p190-A and -B Rho GAPs FF domain  
(RhoGAP-FF1, N=2)

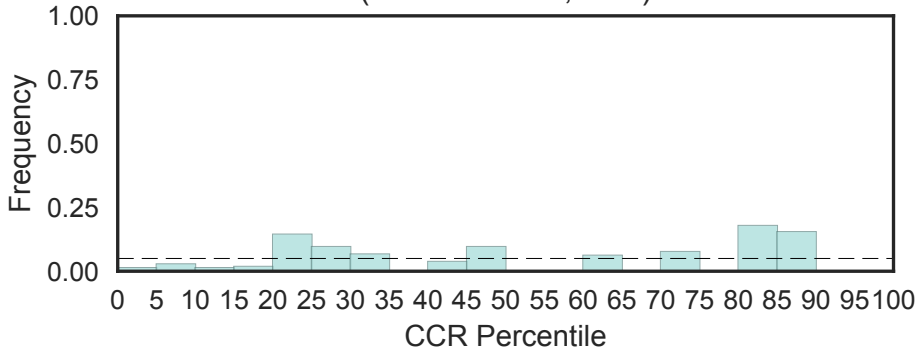

RhoGEF domain  
(RhoGEF, N=70)

Fisher's OR: 1.45; Bonferroni p-val: 1

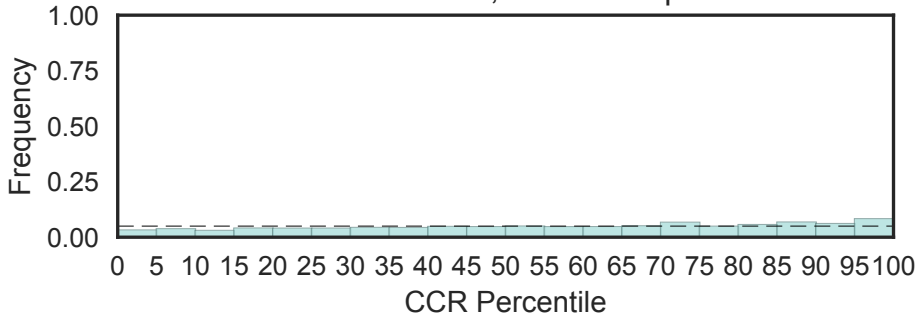

Unstructured region one on RhoGEF 6 and 7  
(RhoGEF67\_u1, N=1)

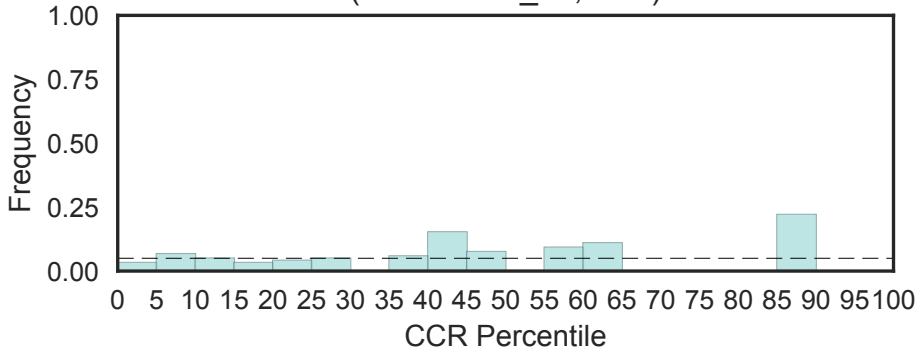

Unstructured region two on RhoGEF 6 and 7  
(RhoGEF67\_u2, N=1)

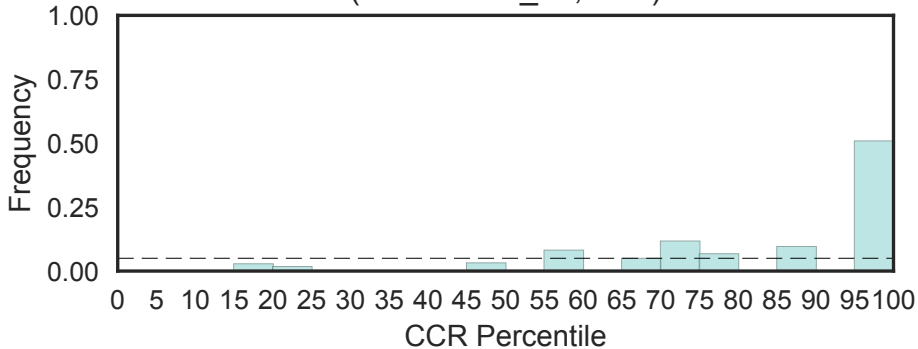

Rho Binding  
(Rho\_Binding, N=2)

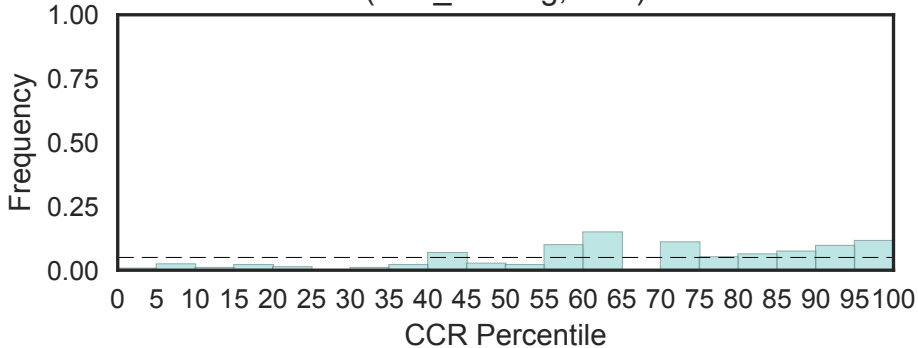

RHO protein GDP dissociation inhibitor  
(Rho\_GDI, N=3)

Fisher's OR: 0.535; Bonferroni p-val: 1

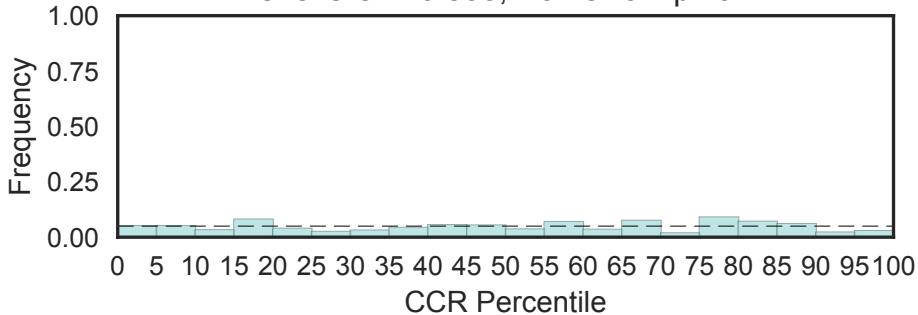

Rhodanese-like domain  
(Rhodanese, N=24)

Fisher's OR: 1.14; Bonferroni p-val: 1

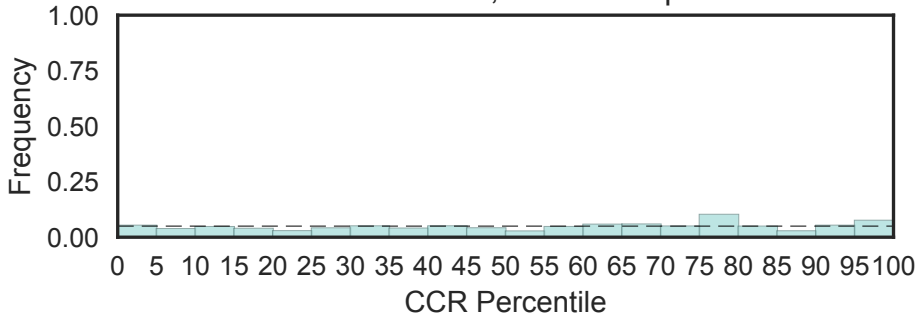

Rhodanase C-terminal  
(Rhodanese\_C, N=1)

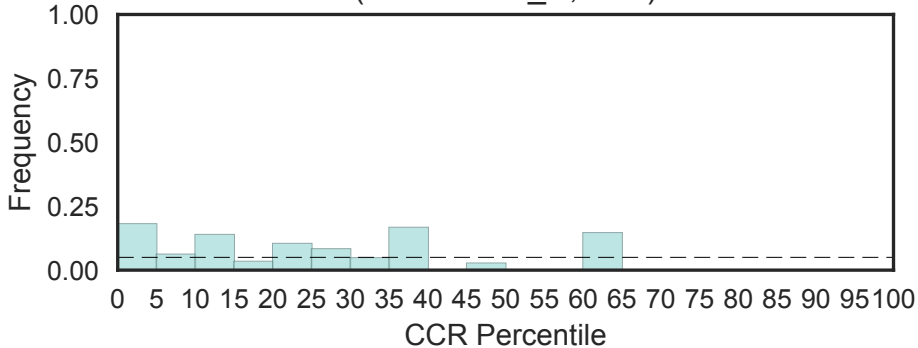



Amino terminal of the G-protein receptor rhodopsin  
(Rhodopsin\_N, N=1)

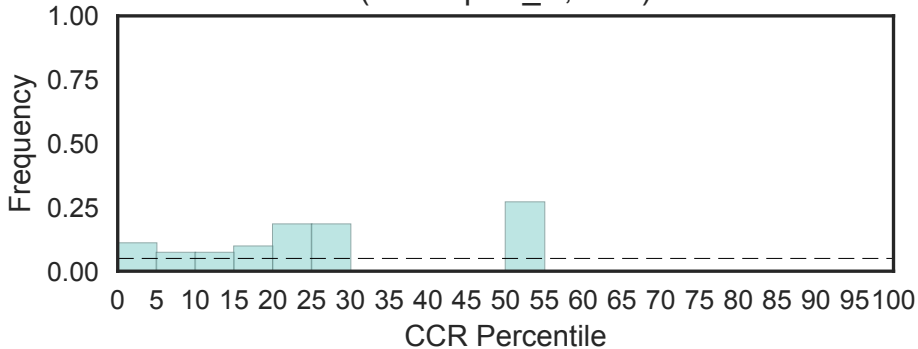

Rhomboid family  
(Rhomboid, N=9)

Fisher's OR: 0.781; Bonferroni p-val: 1

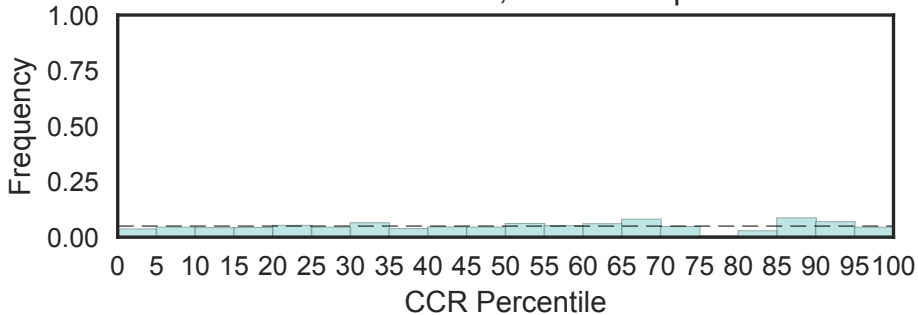

Rhomboid serine protease  
(Rhomboid\_SP, N=2)

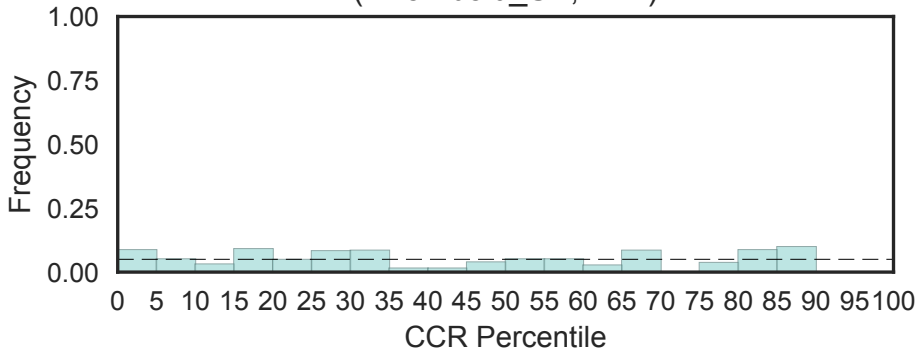

Ribose 5-phosphate isomerase A (phosphoriboisomerase A)  
(Rib\_5-P\_isom\_A, N=1)

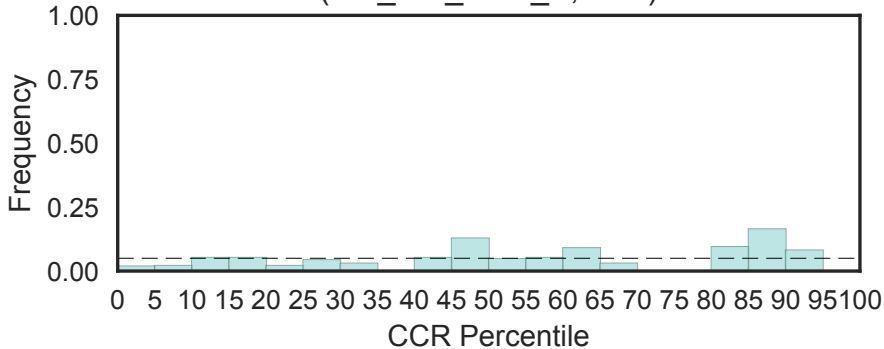

ADP-ribosyl cyclase  
(Rib\_hydrolayse, N=2)

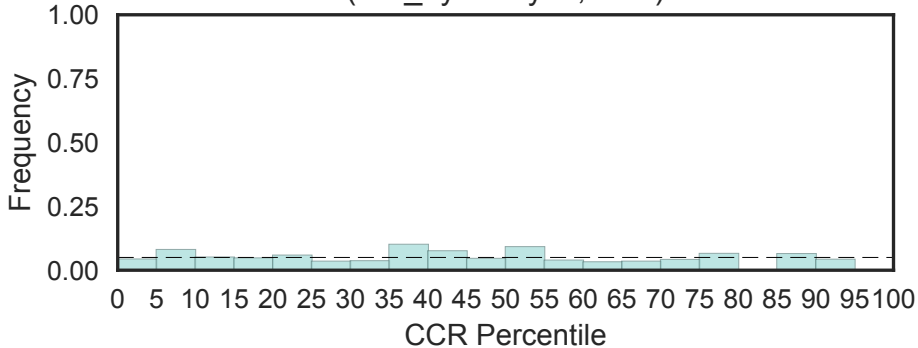

Ribosome receptor lysine/proline rich region  
(Rib\_recp\_KP\_reg, N=1)

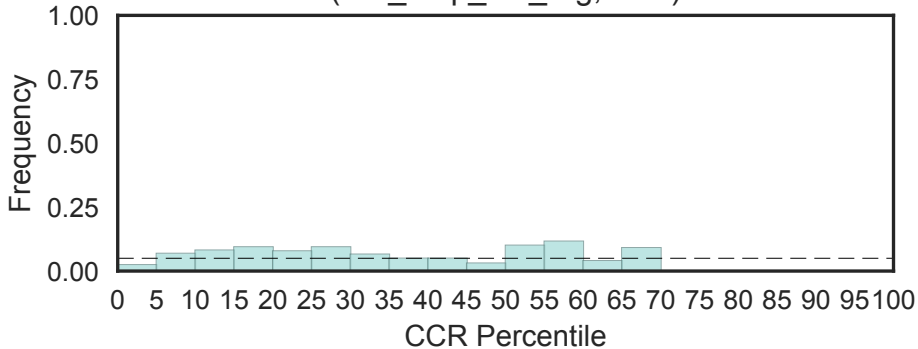

Ribosome biogenesis protein, C-terminal  
(Ribo\_biogen\_C, N=1)

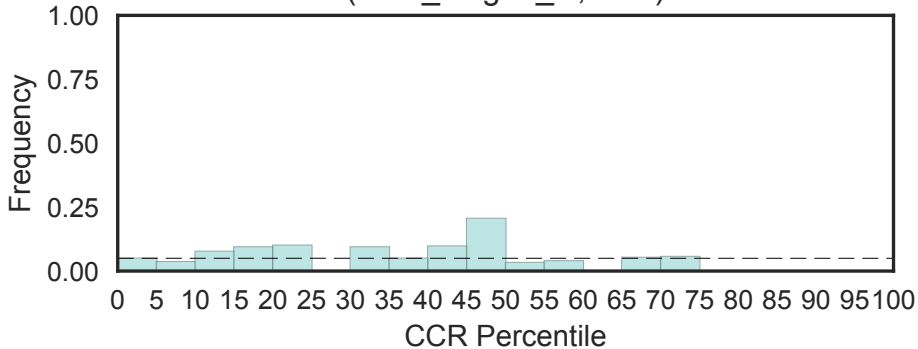

Ribonuclease 2-5A  
(Ribonuc\_2-5A, N=3)  
Fisher's OR: 0; Bonferroni p-val: 1

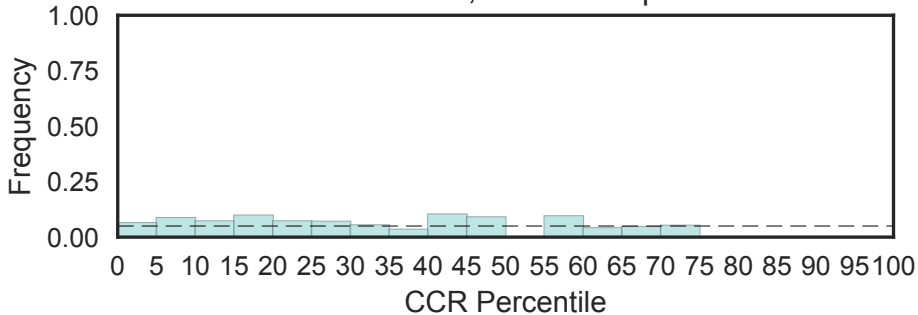



Endoribonuclease L-PSP  
(Ribonuc\_L-PSP, N=1)

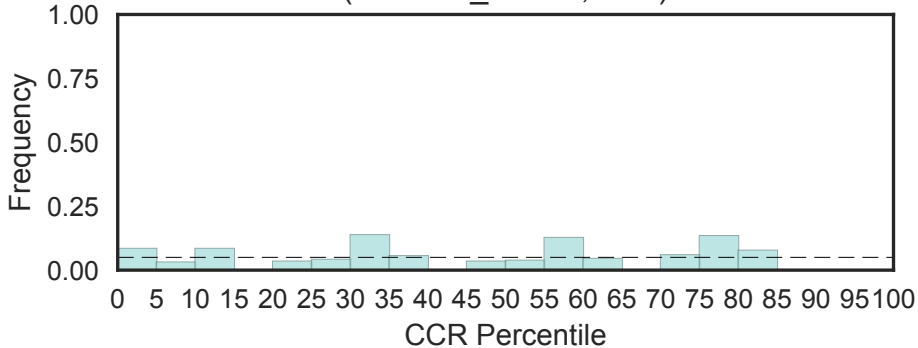

Ribonuclease P 40kDa (Rpp40) subunit  
(Ribonuc\_P\_40, N=1)

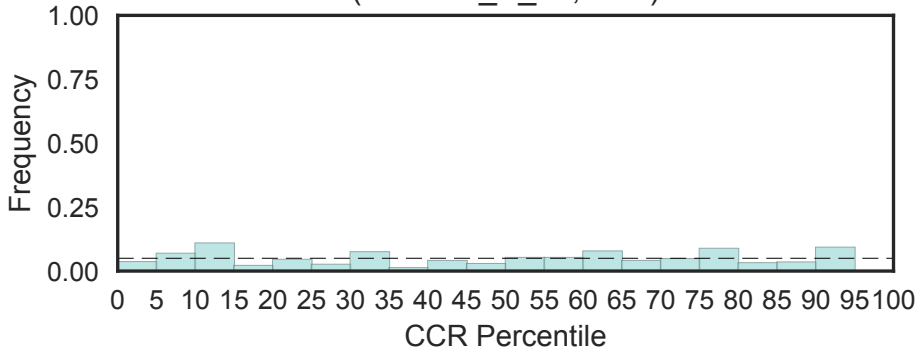

Ribonucleotide reductase, barrel domain  
(Ribonuc\_red\_IgC, N=1)

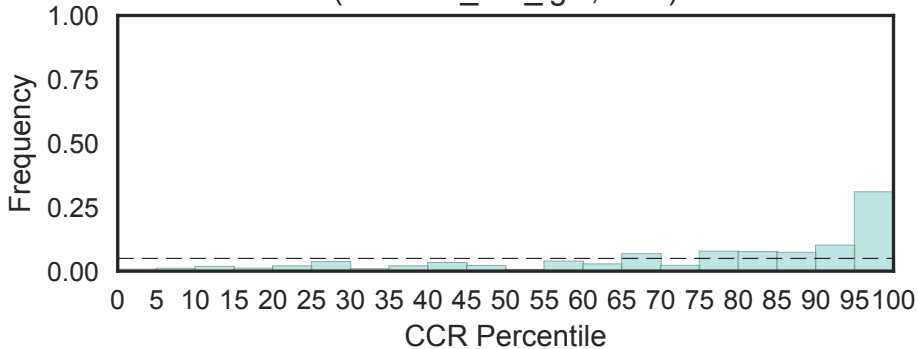

Ribonucleotide reductase, all-alpha domain  
(Ribonuc\_red\_lgN, N=1)

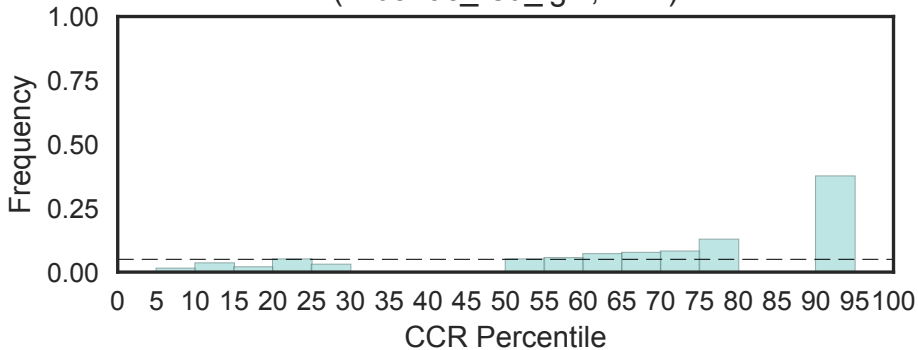

Ribonucleotide reductase, small chain  
(Ribonuc\_red\_sm, N=2)

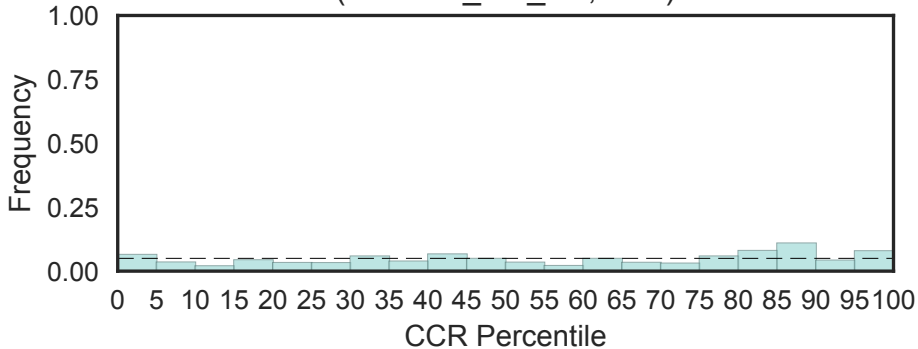

Ribonuclease-III-like  
(Ribonucleas\_3\_3, N=3)

Fisher's OR: 19.3; Bonferroni p-val: 3.34e-06

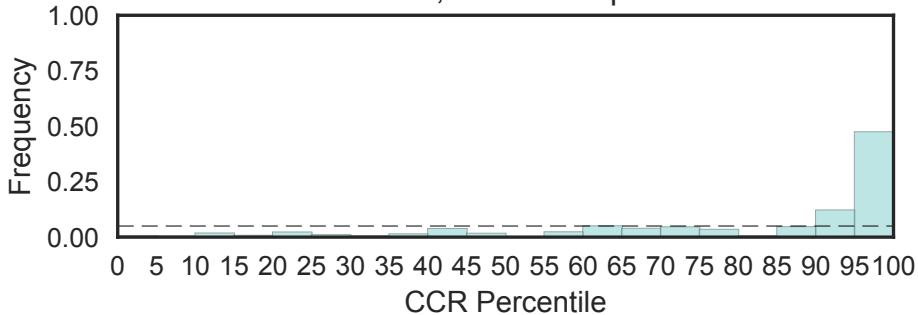

Ribonuclease III domain  
(Ribonuclease\_3, N=4)

Fisher's OR: 13.8; Bonferroni p-val: 3.98e-07

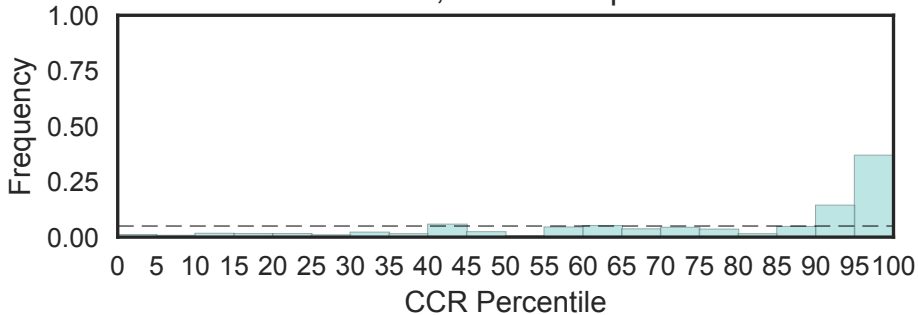

Ribonuclease T2 family  
(Ribonuclease\_T2, N=2)

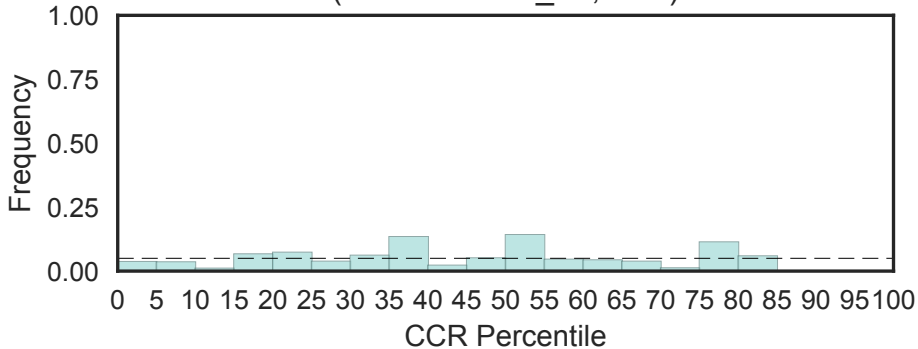



# Ribophorin I (Ribophorin\_I, N=1)

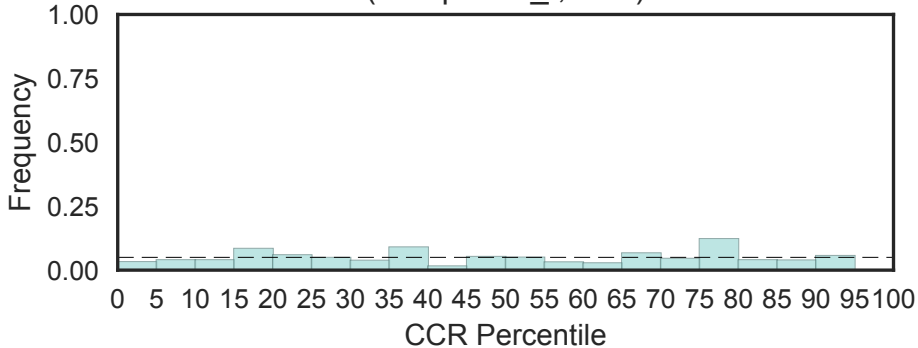

Oligosaccharyltransferase subunit Ribophorin II  
(Ribophorin\_II, N=1)

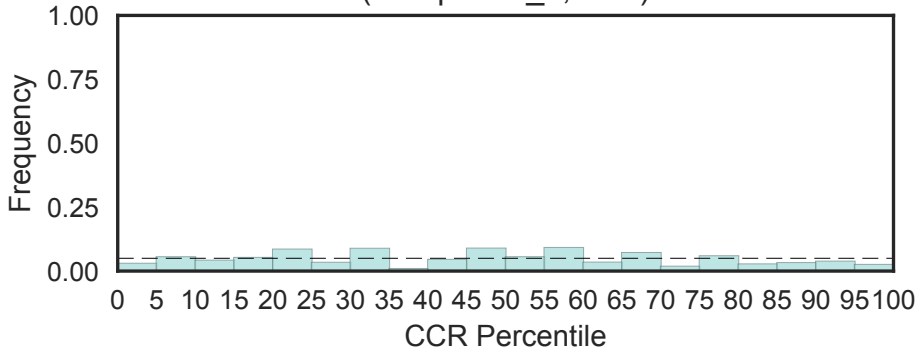

60S ribosomal protein L4 C-terminal domain  
(Ribos\_L4\_asso\_C, N=1)

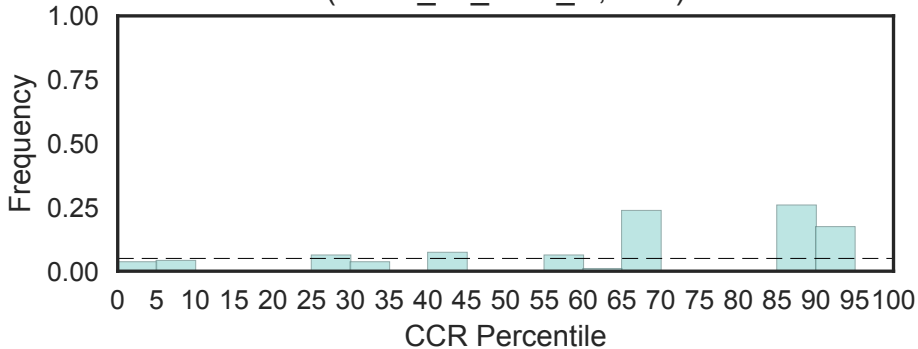

Ribosomal protein S12/S23  
(Ribosom\_S12\_S23, N=2)

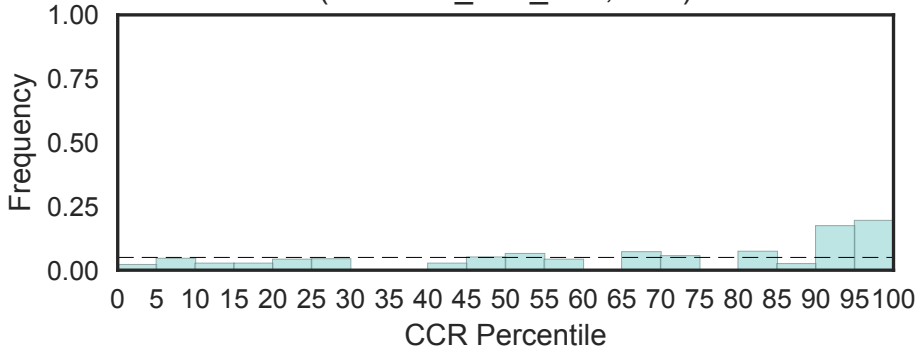

60s Acidic ribosomal protein  
(Ribosomal\_60s, N=3)  
Fisher's OR: 0; Bonferroni p-val: 1

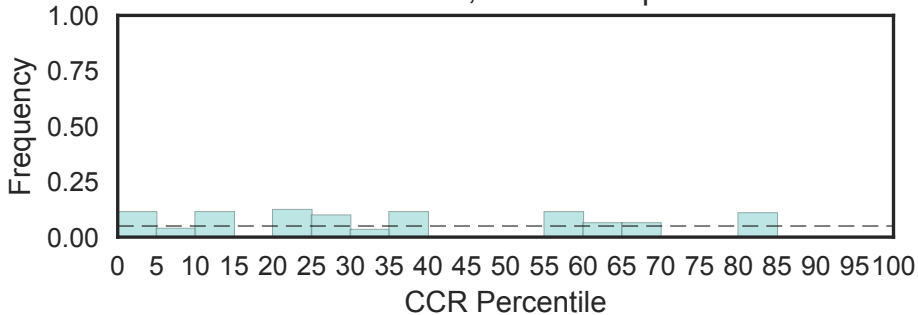

Ribosomal protein L1p/L10e family  
(Ribosomal\_L1, N=3)  
Fisher's OR: 0.489; Bonferroni p-val: 1

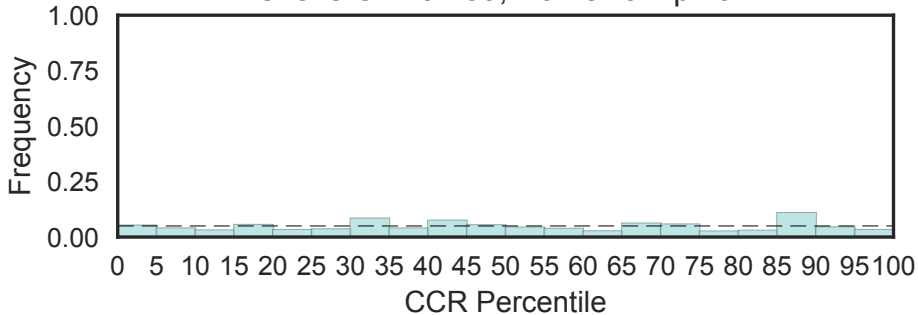

Ribosomal protein L10  
(Ribosomal\_L10, N=3)  
Fisher's OR: 0; Bonferroni p-val: 1

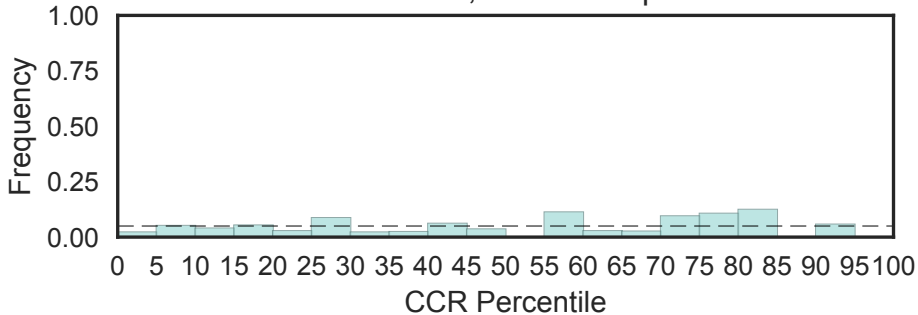

Ribosomal protein L11, RNA binding domain  
(Ribosomal\_L11, N=2)

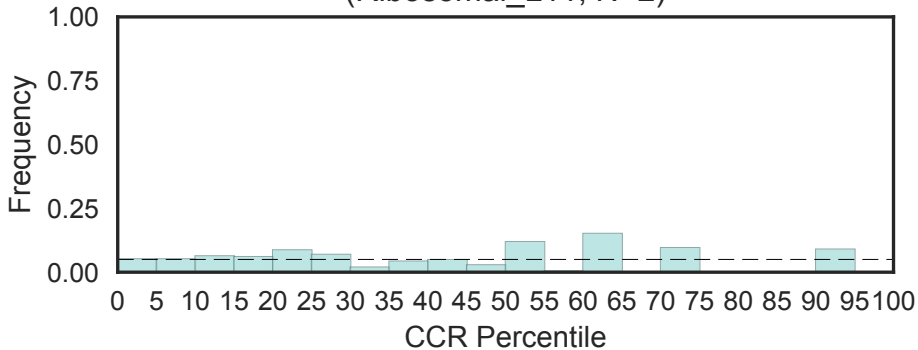



Ribosomal protein L11, N-terminal domain  
(Ribosomal\_L11\_N, N=2)

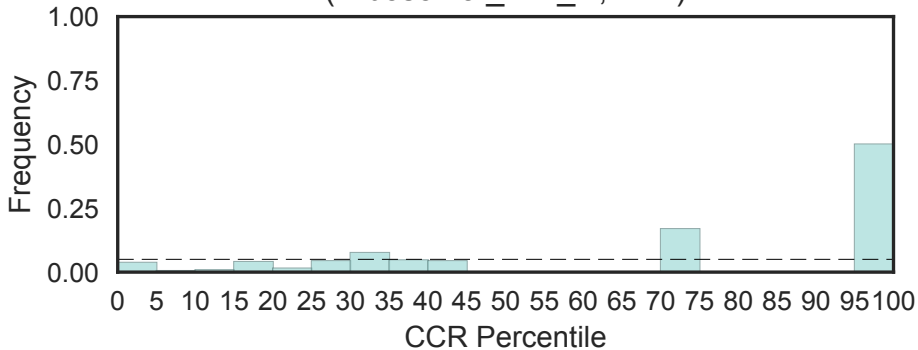

Ribosomal protein L7/L12 C-terminal domain  
(Ribosomal\_L12, N=2)

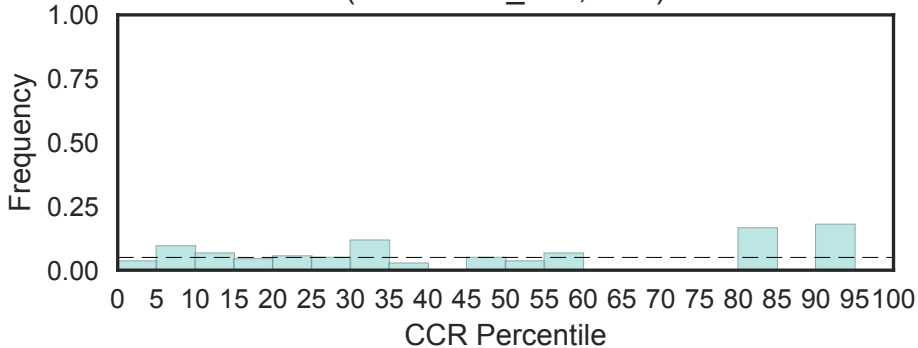

Ribosomal protein L7/L12 dimerisation domain  
(Ribosomal\_L12\_N, N=2)

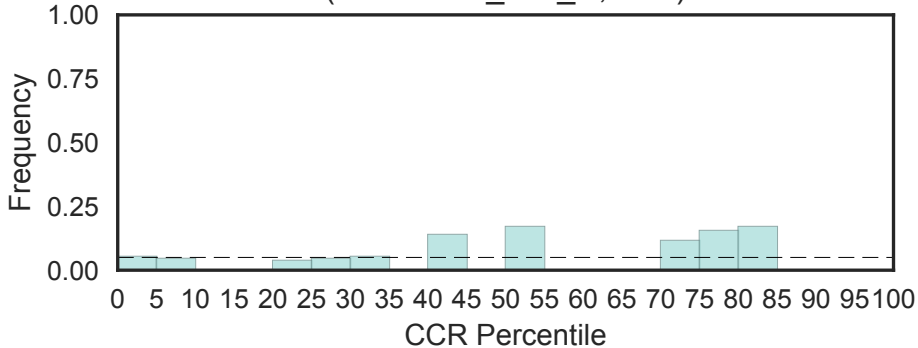

Ribosomal protein L13  
(Ribosomal\_L13, N=2)

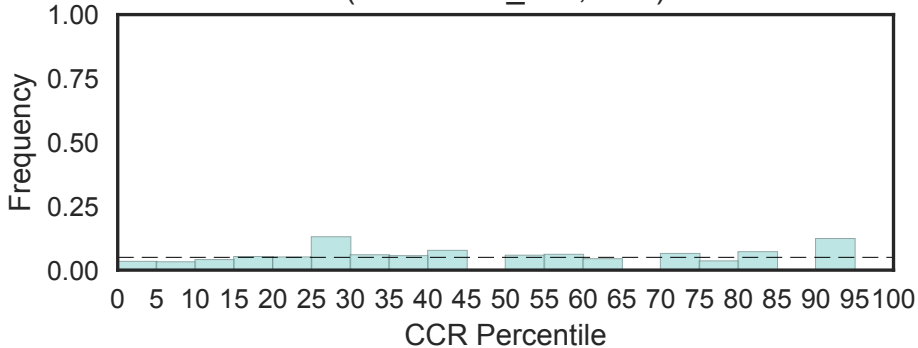

Ribosomal protein L13e  
(Ribosomal\_L13e, N=1)

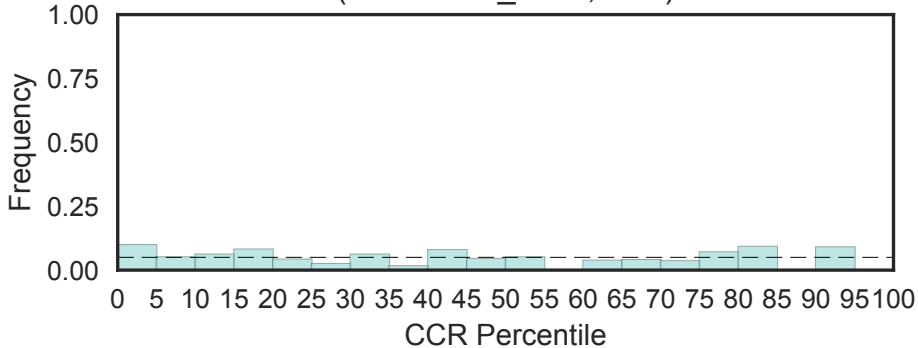

Ribosomal protein L14p/L23e  
(Ribosomal\_L14, N=2)

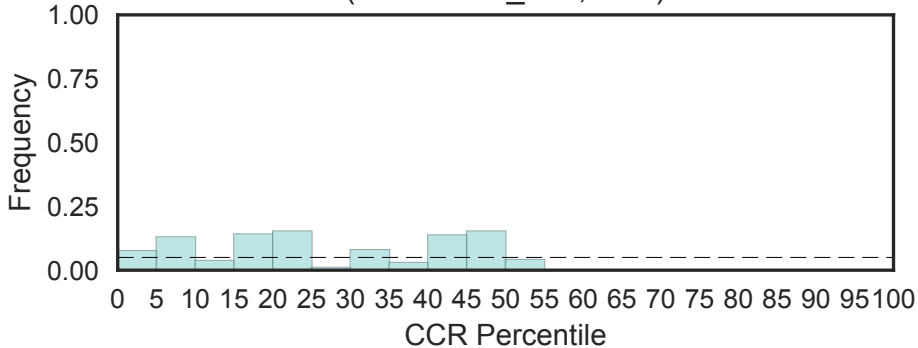

Ribosomal protein L14  
(Ribosomal\_L14e, N=1)

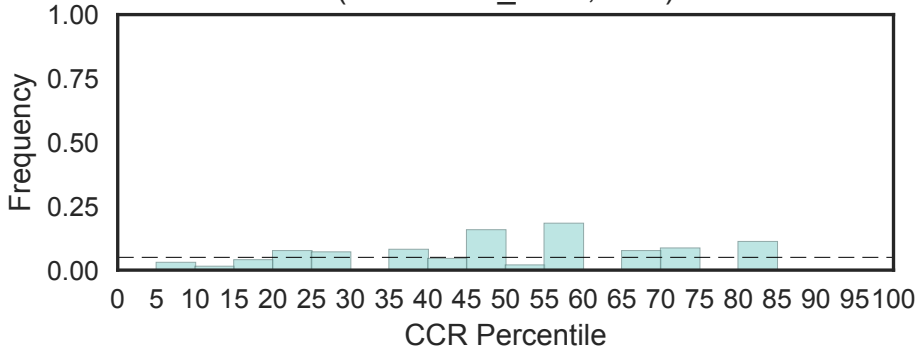

Ribosomal protein L16p/L10e  
(Ribosomal\_L16, N=2)

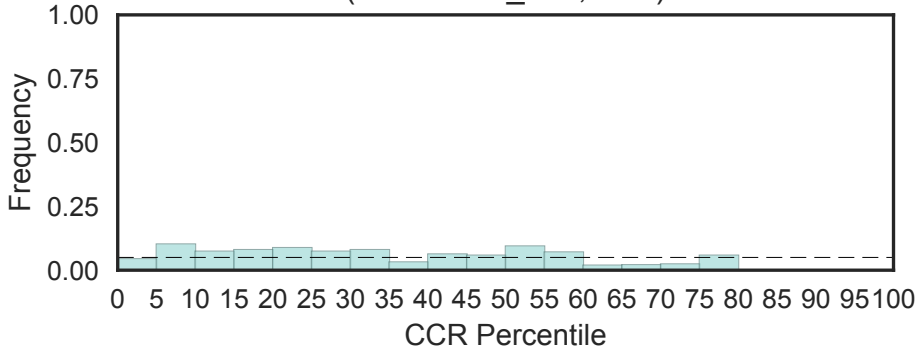



Ribosomal protein L17  
(Ribosomal\_L17, N=1)

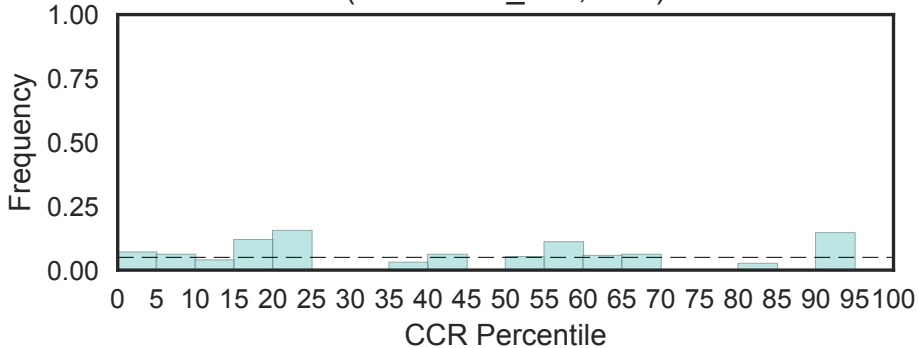

Ribosomal protein 60S L18 and 50S L18e  
(Ribosomal\_L18, N=1)

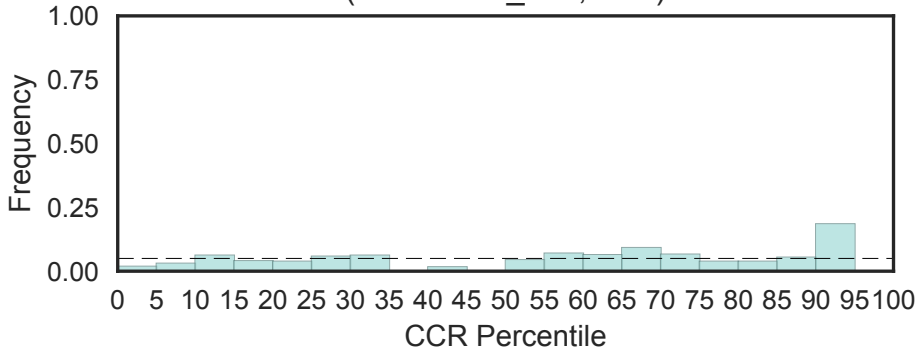

Ribosomal proteins 50S-L18Ae/60S-L20/60S-L18A  
(Ribosomal\_L18A, N=1)

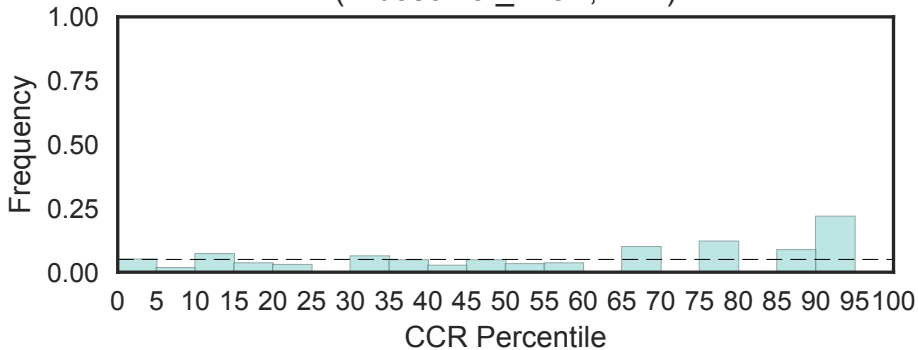

Ribosomal L18 C-terminal region  
(Ribosomal\_L18\_c, N=1)

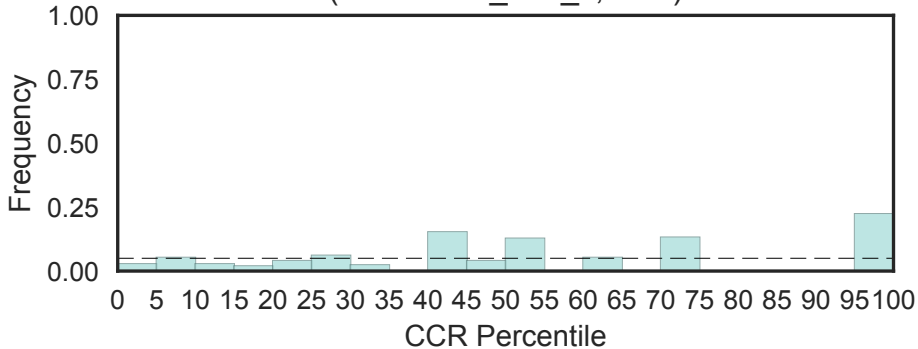

Ribosomal L18 of archaea, bacteria, mitoch. and chloroplast  
(Ribosomal\_L18p, N=1)

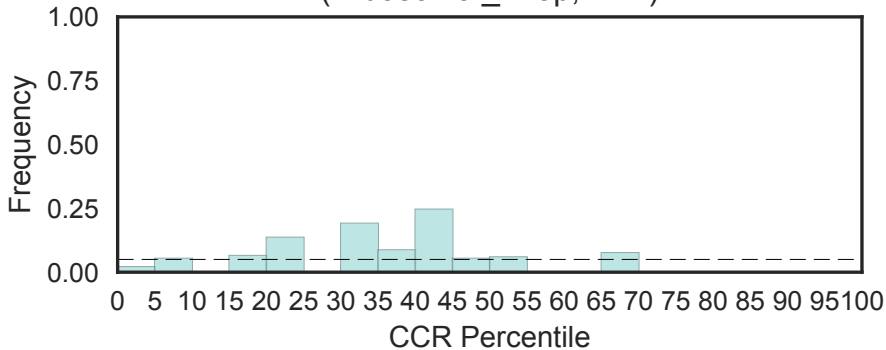

Ribosomal protein L19  
(Ribosomal\_L19, N=1)

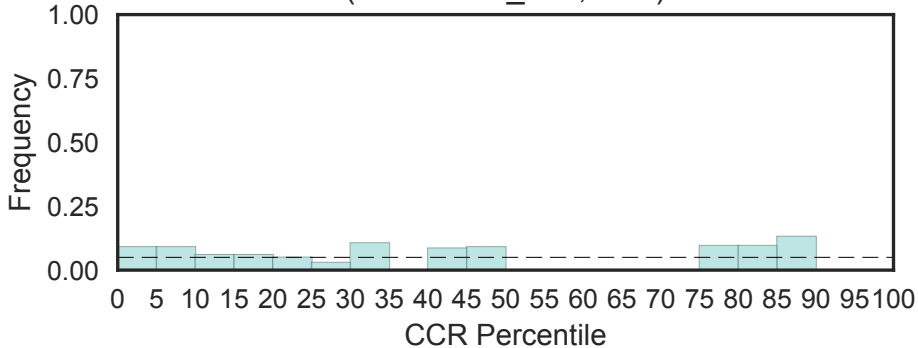

Ribosomal Proteins L2, RNA binding domain  
(Ribosomal\_L2, N=2)

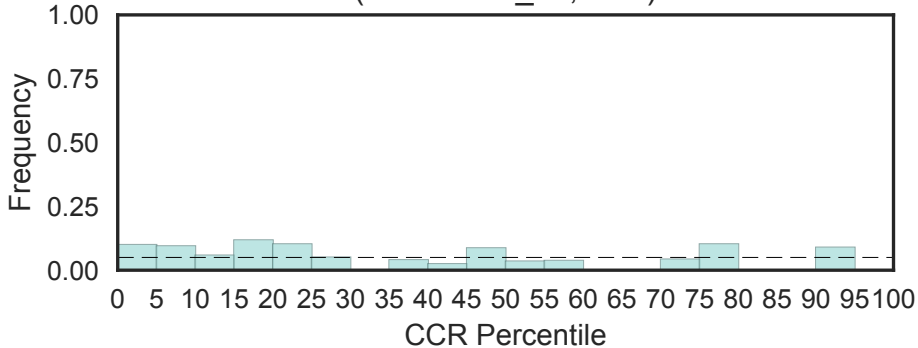

Ribosomal protein L20  
(Ribosomal\_L20, N=1)

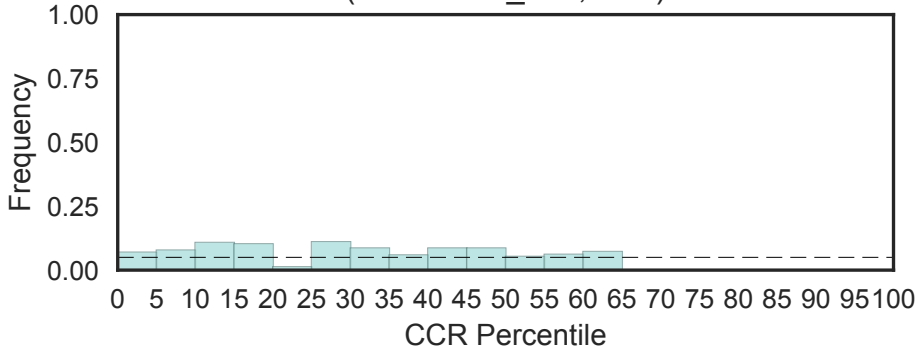



Ribosomal protein L21e  
(Ribosomal\_L21e, N=1)

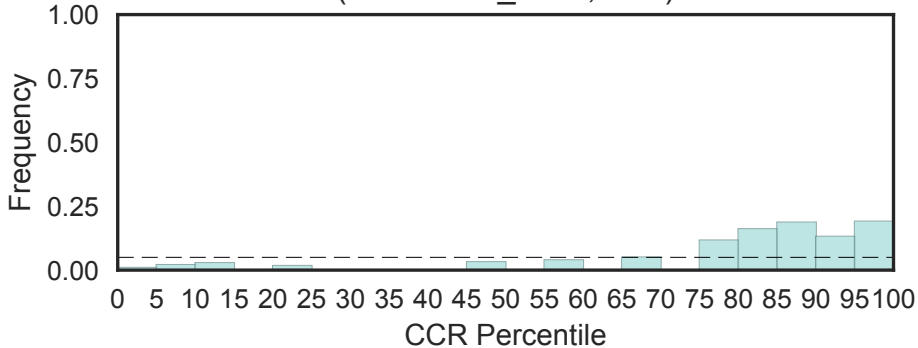

Ribosomal prokaryotic L21 protein  
(Ribosomal\_L21p, N=1)

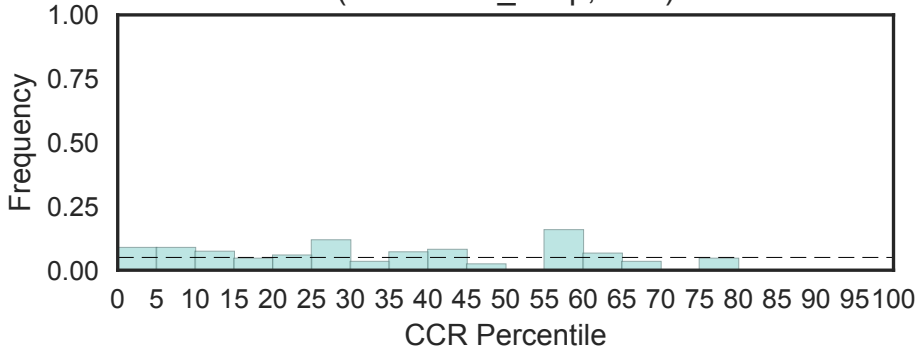

Ribosomal protein L22p/L17e  
(Ribosomal\_L22, N=3)  
Fisher's OR: 0; Bonferroni p-val: 1

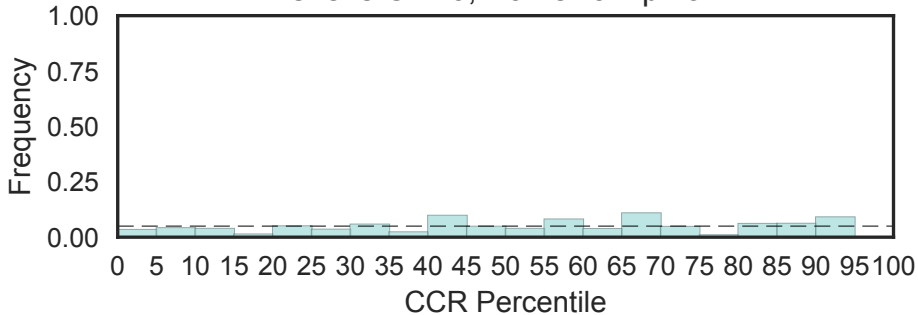

Ribosomal L22e protein family  
(Ribosomal\_L22e, N=2)

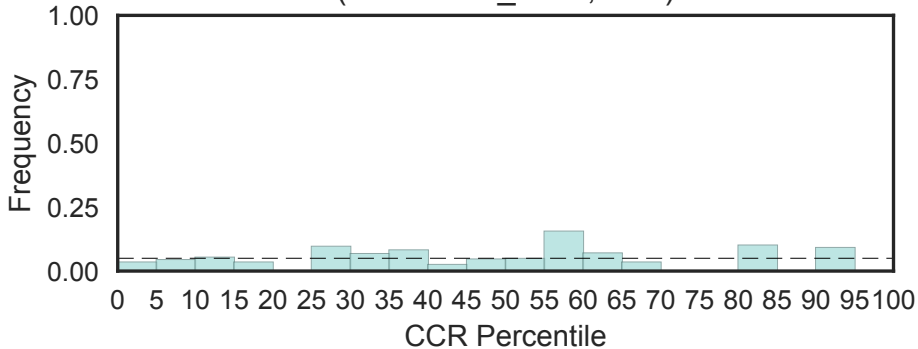

Ribosomal protein L23  
(Ribosomal\_L23, N=2)

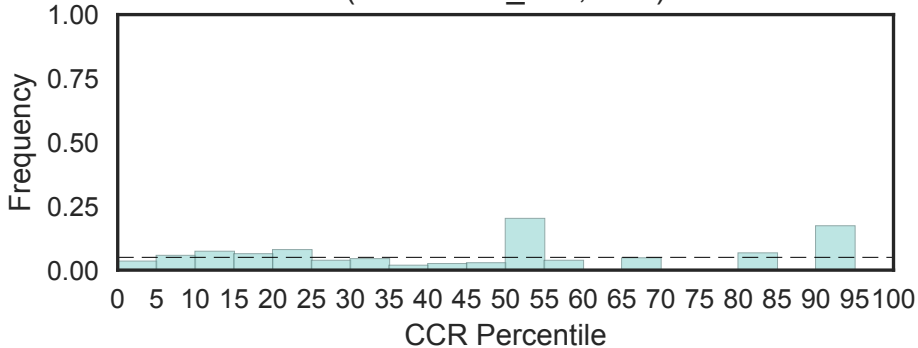

Ribosomal protein L23, N-terminal domain  
(Ribosomal\_L23eN, N=1)

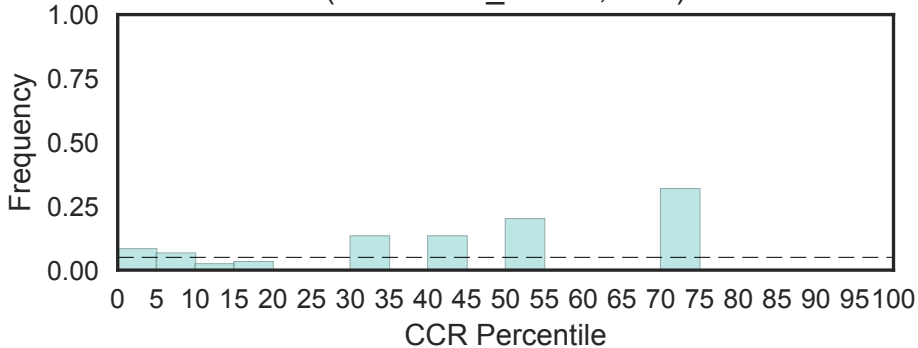

Ribosomal protein L24e  
(Ribosomal\_L24e, N=2)

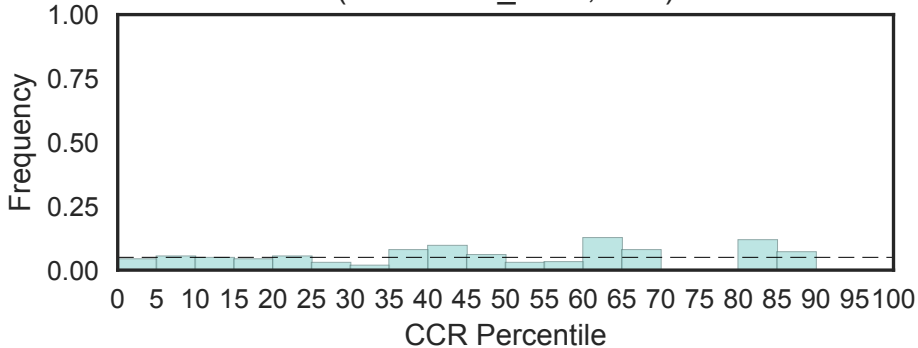

Ribosomal proteins L26 eukaryotic, L24P archaeal  
(Ribosomal\_L26, N=2)

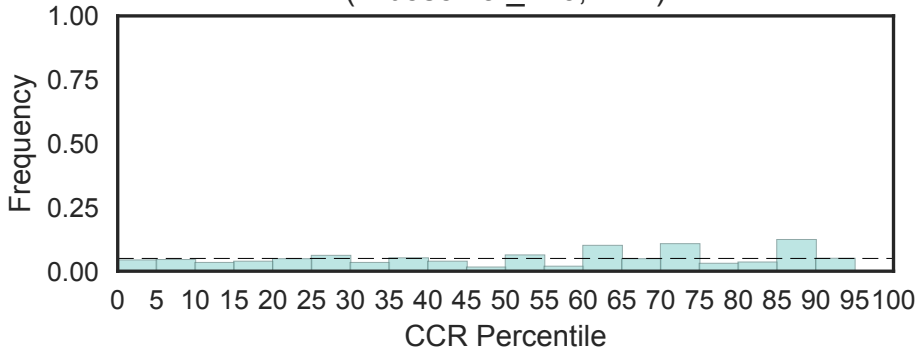



Ribosomal L27 protein  
(Ribosomal\_L27, N=1)

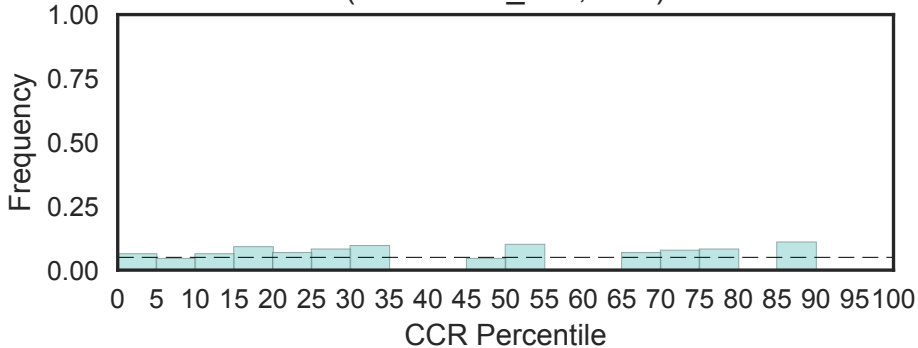

Ribosomal proteins 50S-L15, 50S-L18e, 60S-L27A  
(Ribosomal\_L27A, N=2)

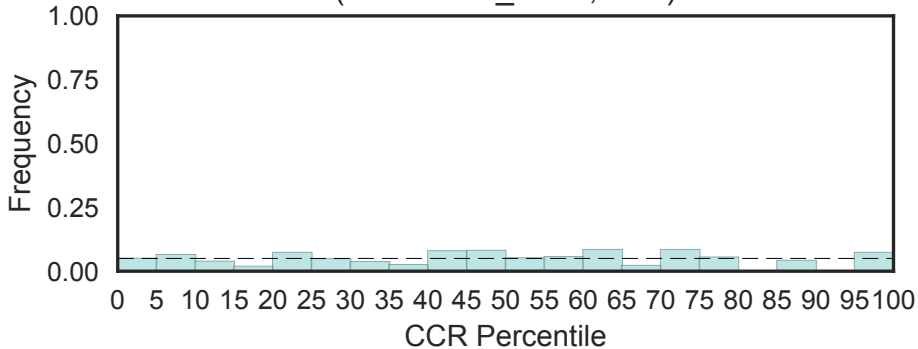

Ribosomal L27e protein family  
(Ribosomal\_L27e, N=1)

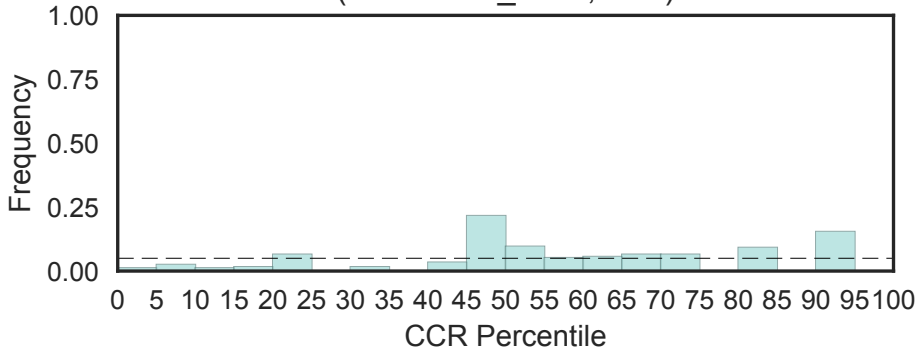

Ribosomal L28 family  
(Ribosomal\_L28, N=1)

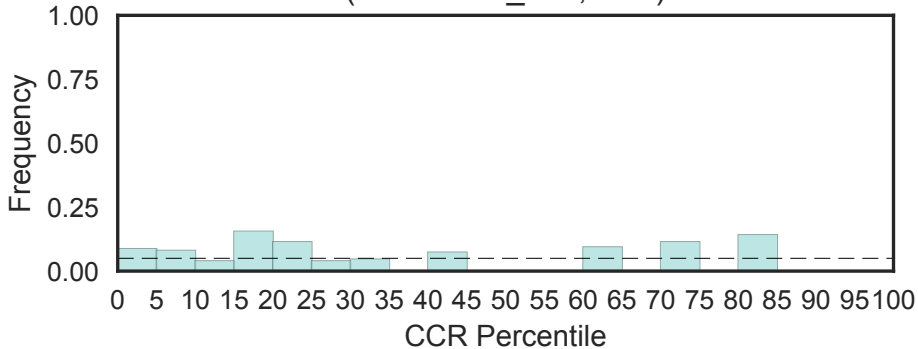

Ribosomal L28e protein family  
(Ribosomal\_L28e, N=2)

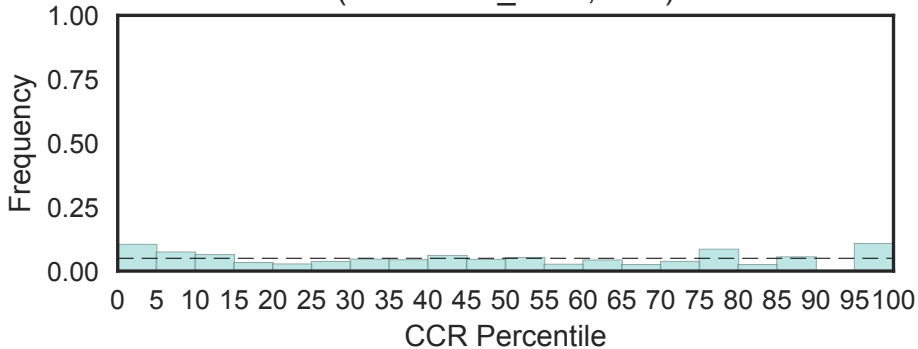

Ribosomal L29 protein  
(Ribosomal\_L29, N=1)

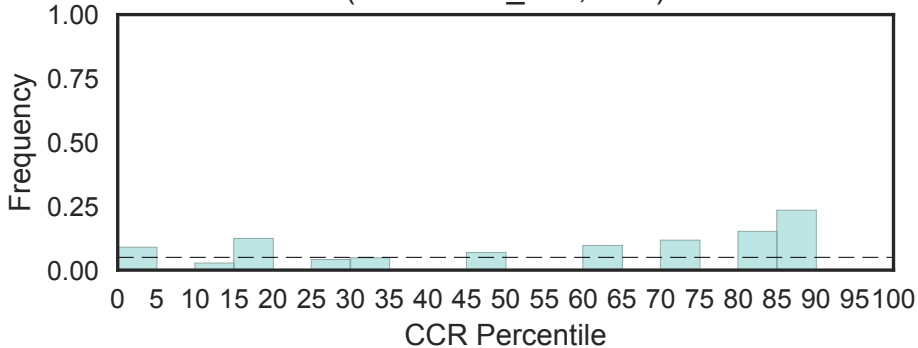

Ribosomal L29e protein family  
(Ribosomal\_L29e, N=1)

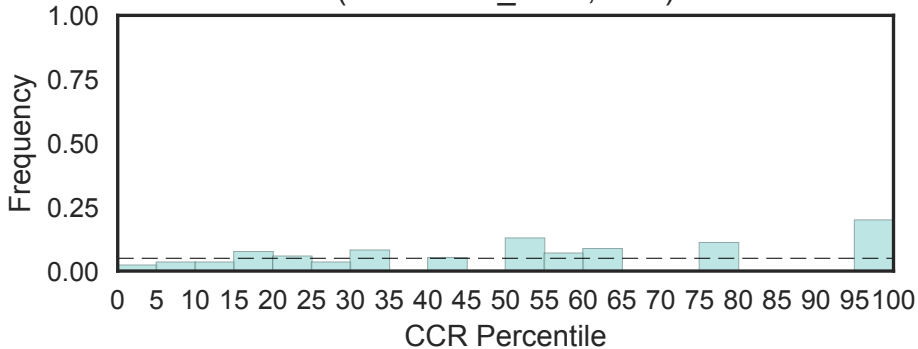

Ribosomal Proteins L2, C-terminal domain  
(Ribosomal\_L2\_C, N=2)

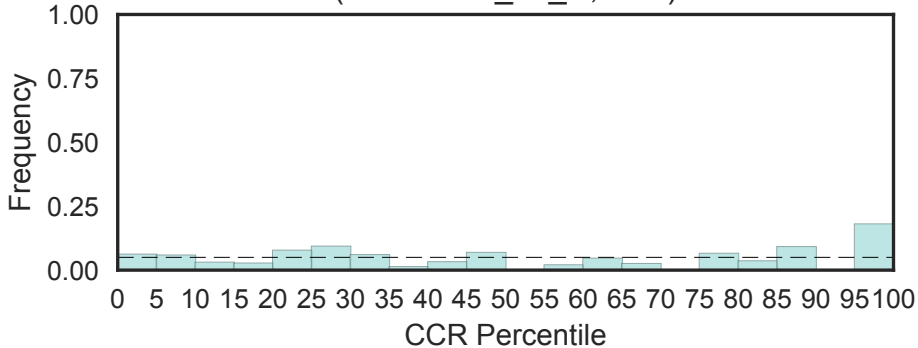



Ribosomal protein L3  
(Ribosomal\_L3, N=4)

Fisher's OR: 0.467; Bonferroni p-val: 1

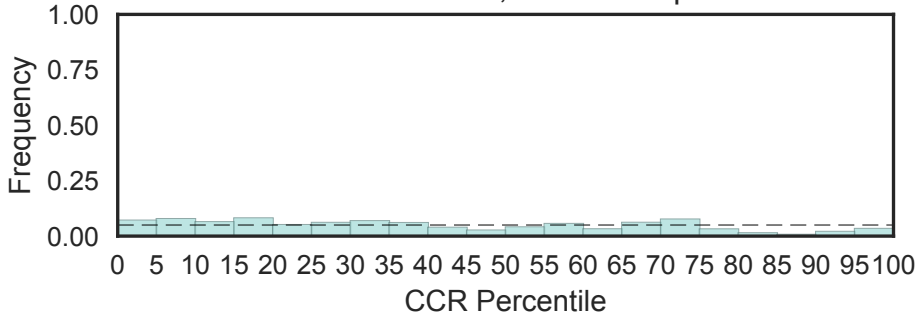

Ribosomal protein L30p/L7e  
(Ribosomal\_L30, N=4)

Fisher's OR: 5.41; Bonferroni p-val: 1

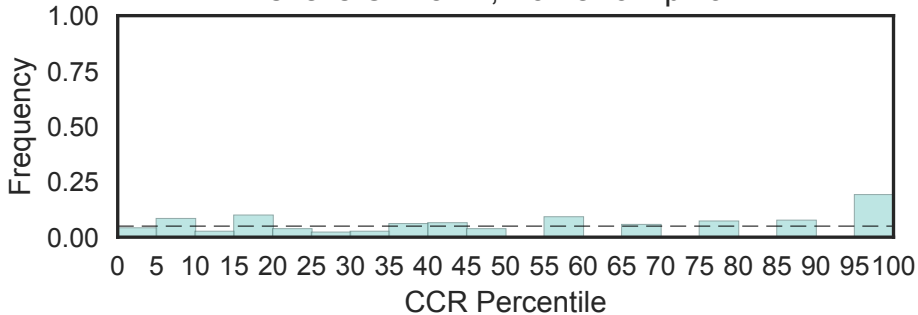

Ribosomal L30 N-terminal domain  
(Ribosomal\_L30\_N, N=2)

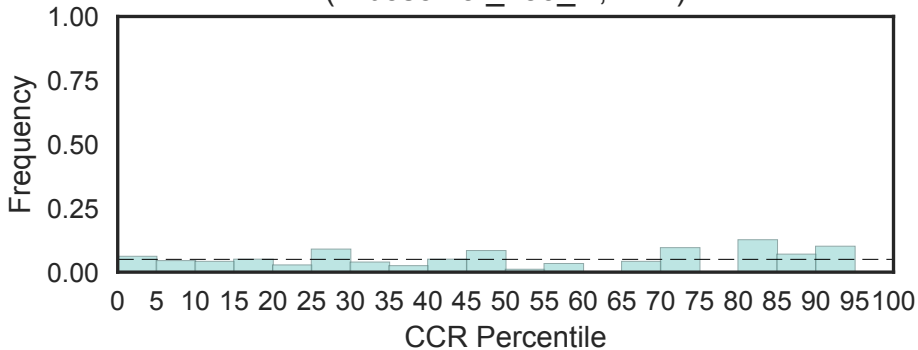

Ribosomal protein L31e  
(Ribosomal\_L31e, N=1)

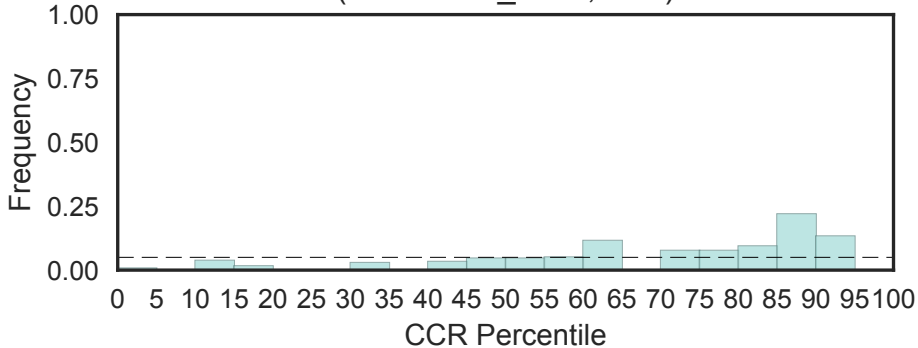

Ribosomal protein L32  
(Ribosomal\_L32e, N=1)

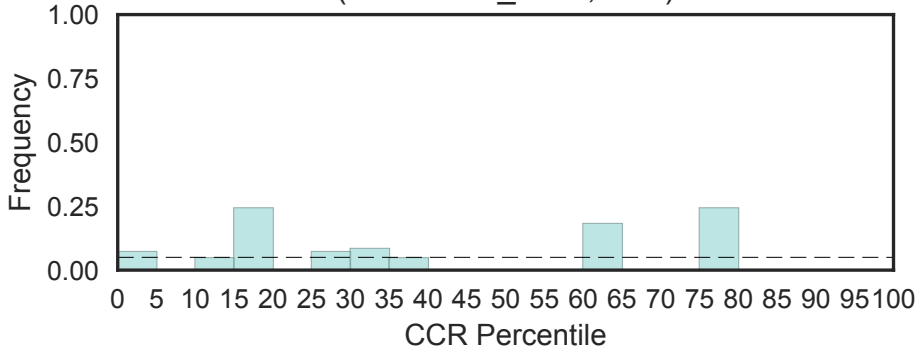

Ribosomal L32p protein family  
(Ribosomal\_L32p, N=1)

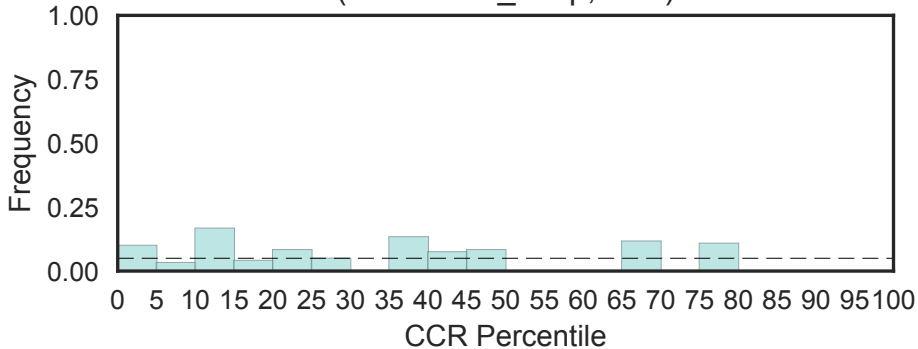

Ribosomal protein L33  
(Ribosomal\_L33, N=2)

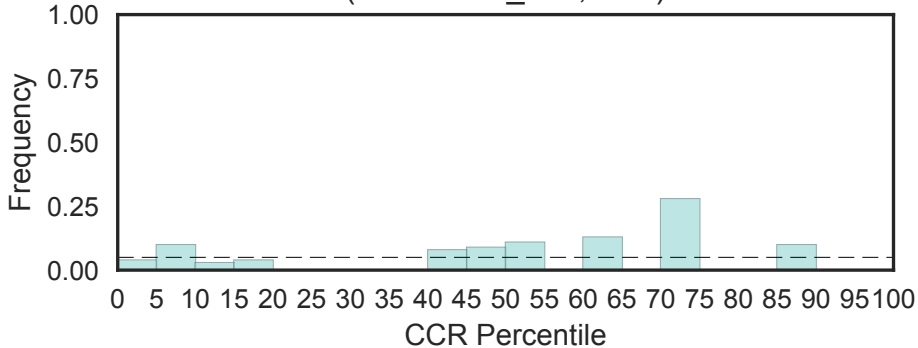

Ribosomal protein L34  
(Ribosomal\_L34, N=1)

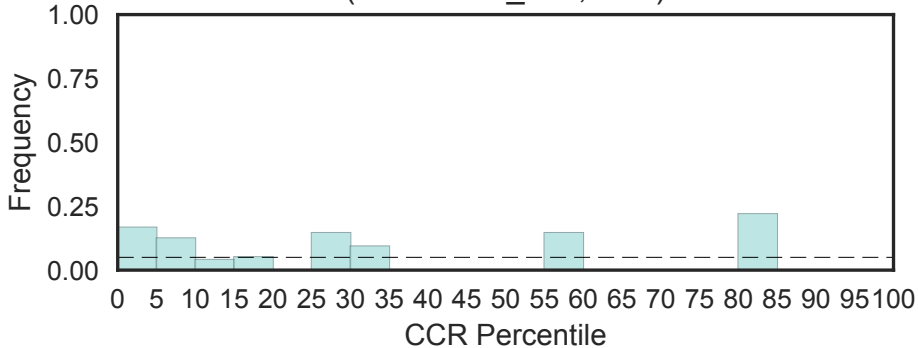



Ribosomal protein L34e  
(Ribosomal\_L34e, N=1)

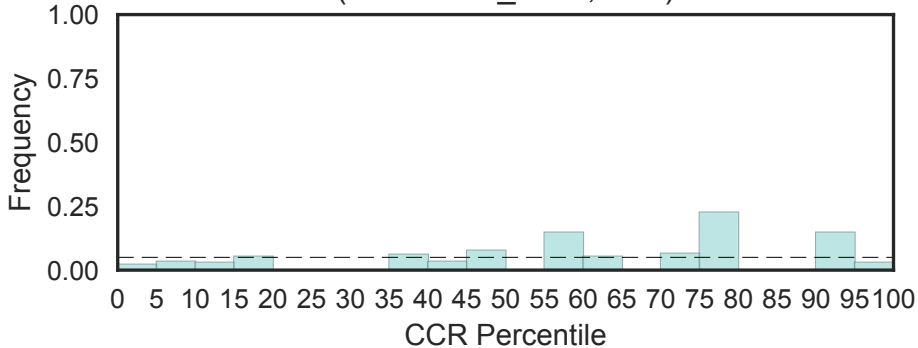

Ribosomal protein L35Ae  
(Ribosomal\_L35Ae, N=1)

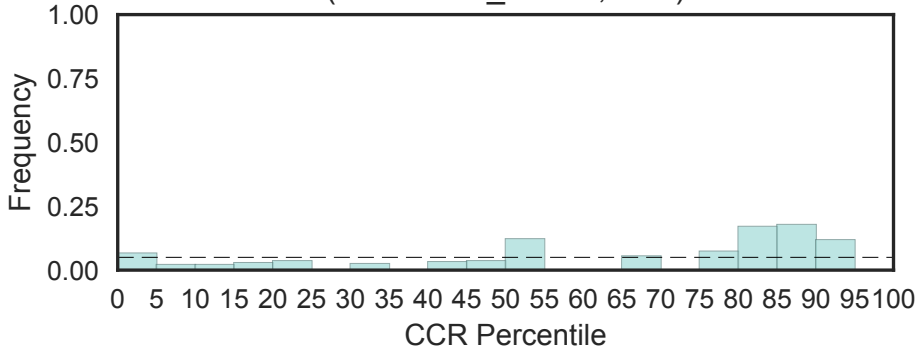

Ribosomal protein L35  
(Ribosomal\_L35p, N=1)

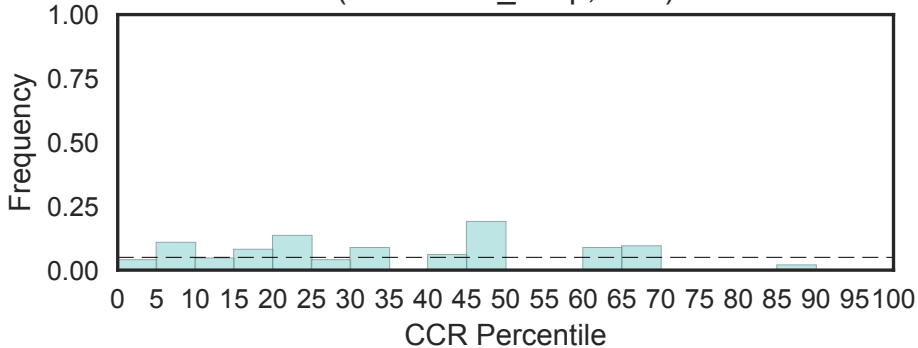

Ribosomal protein L36  
(Ribosomal\_L36, N=1)

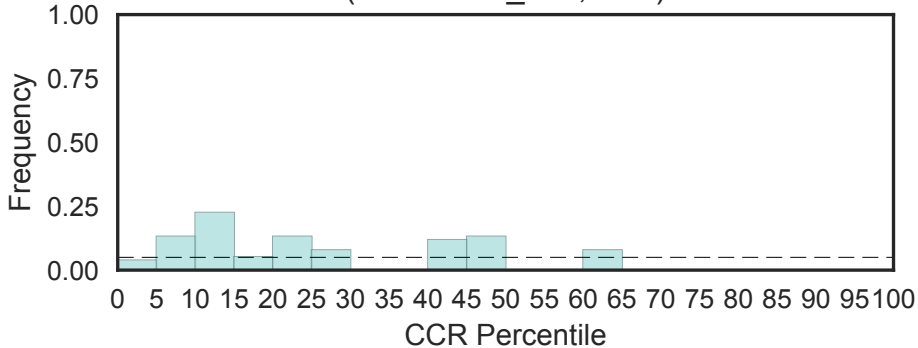

Ribosomal protein L36e  
(Ribosomal\_L36e, N=1)

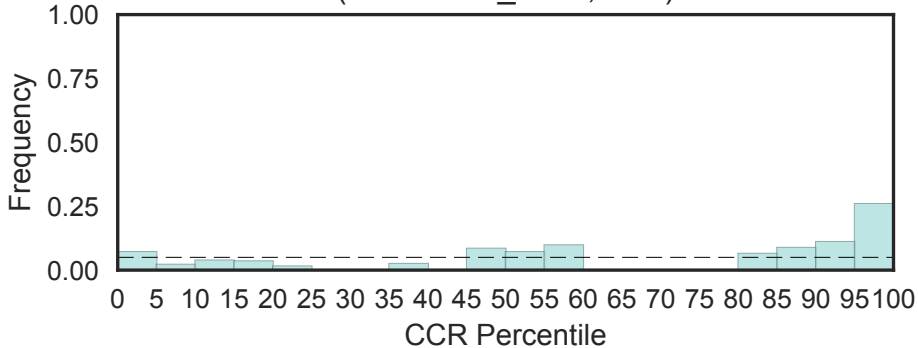

Mitochondrial ribosomal protein L37  
(Ribosomal\_L37, N=1)

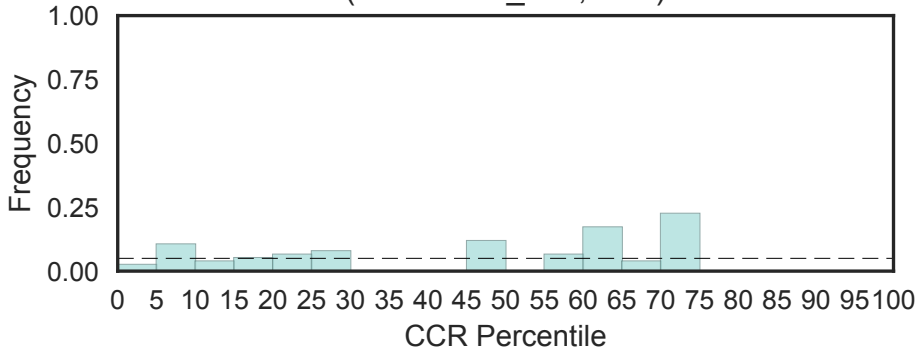

Ribosomal L37ae protein family  
(Ribosomal\_L37ae, N=1)

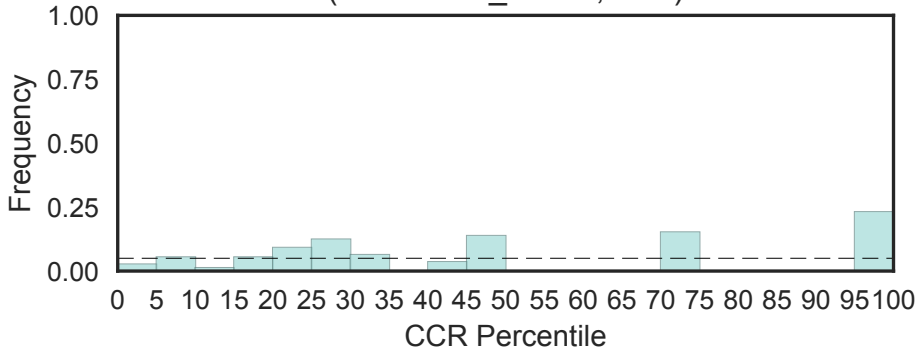

Ribosomal protein L37e  
(Ribosomal\_L37e, N=1)

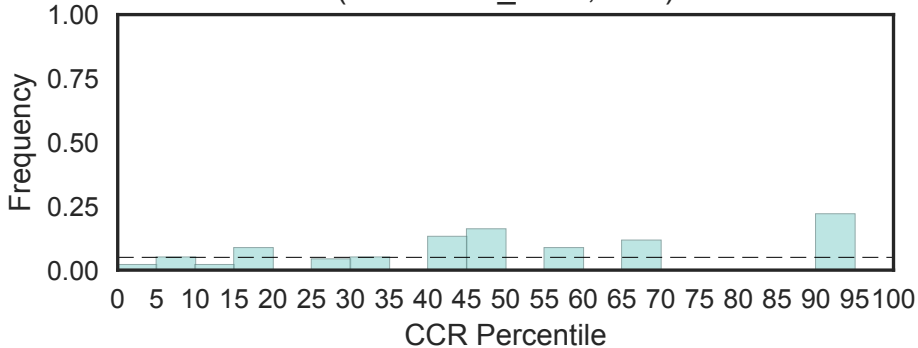



Ribosomal L38e protein family  
(Ribosomal\_L38e, N=1)

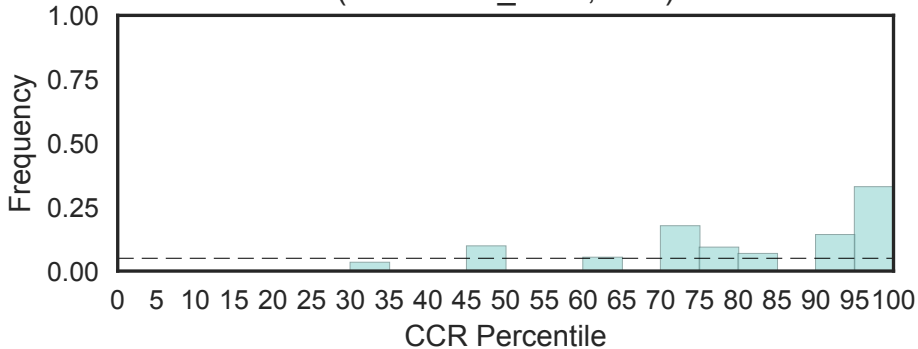

Ribosomal L39 protein  
(Ribosomal\_L39, N=1)

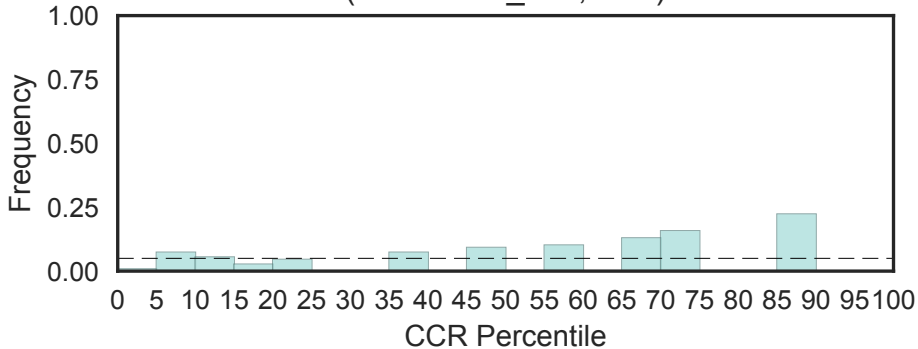

Ribosomal protein L4/L1 family  
(Ribosomal\_L4, N=2)

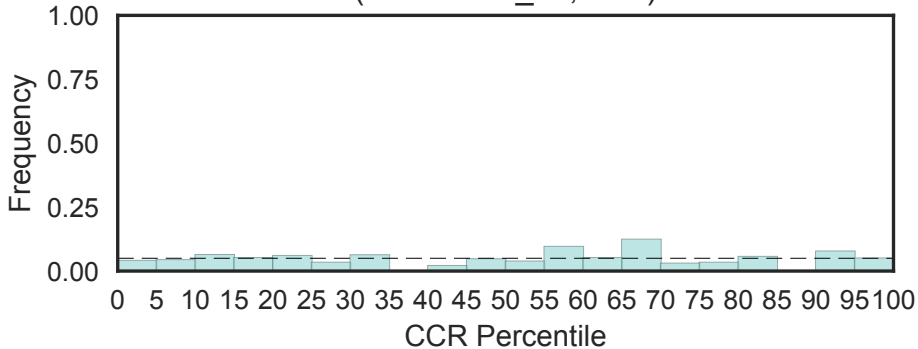

Ribosomal L40e family  
(Ribosomal\_L40e, N=1)

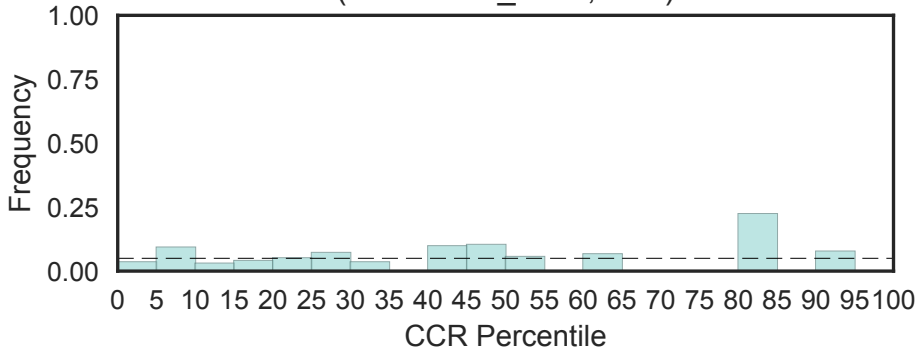

Ribosomal protein L41  
(Ribosomal\_L41, N=1)

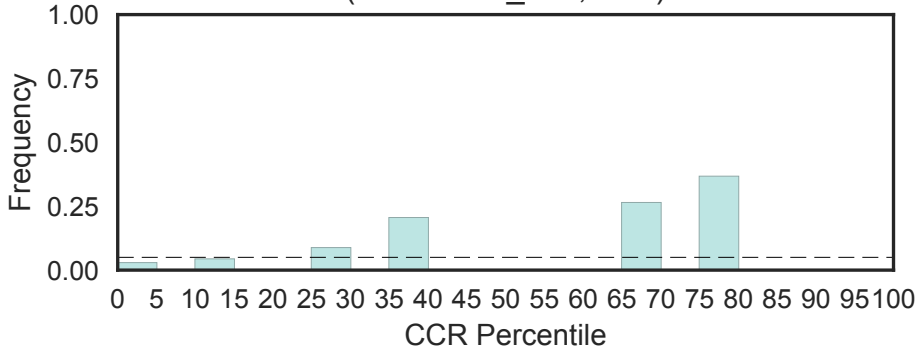

Ribosomal protein L44  
(Ribosomal\_L44, N=1)

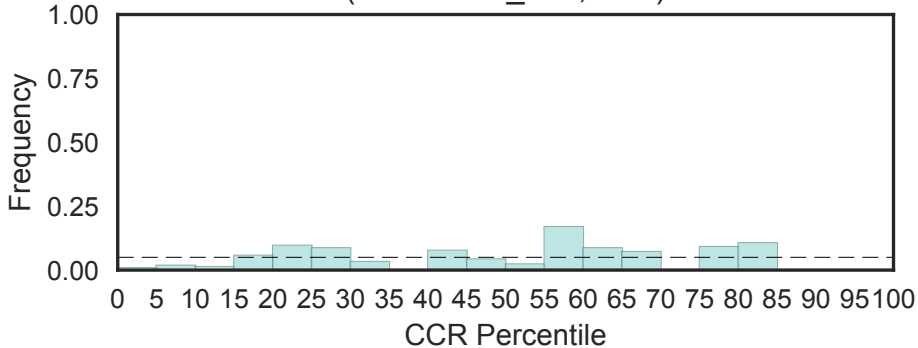

Ribosomal protein L5  
(Ribosomal\_L5, N=1)

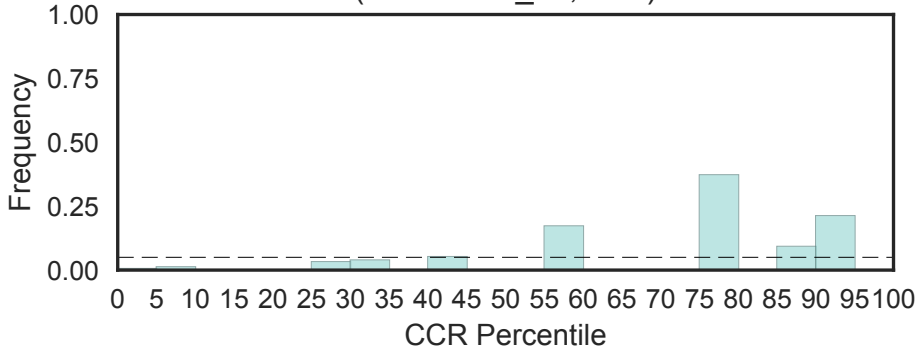

Ribosomal subunit 39S  
(Ribosomal\_L50, N=1)

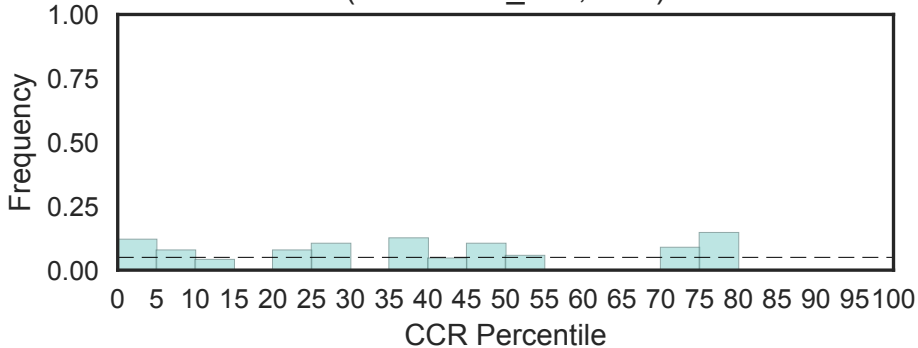



ribosomal L5P family C-terminus  
(Ribosomal\_L5\_C, N=1)

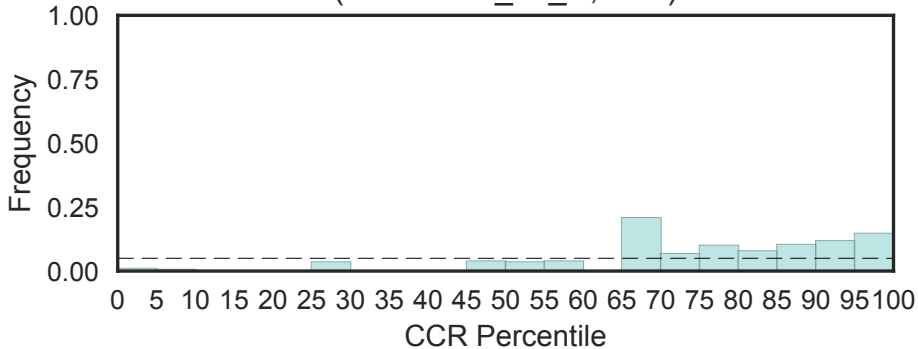

Ribosomal large subunit proteins 60S L5, and 50S L18  
(Ribosomal\_L5e, N=1)

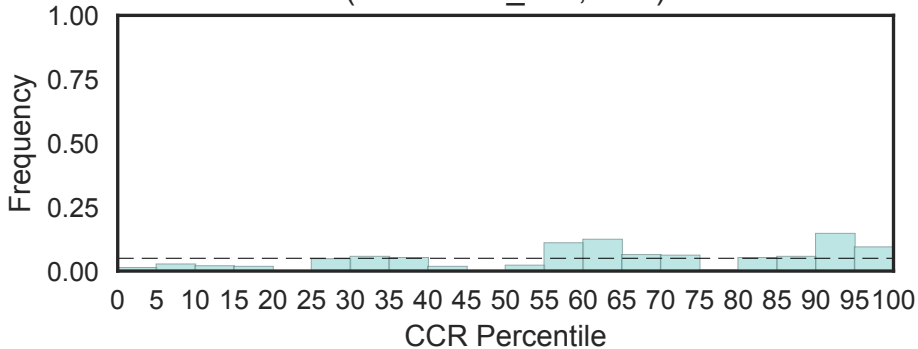

Ribosomal protein L6  
(Ribosomal\_L6, N=2)

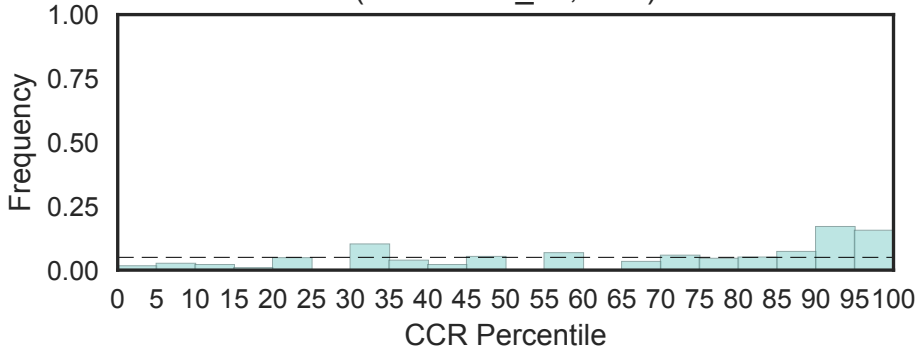

Ribosomal protein L6e  
(Ribosomal\_L6e, N=1)

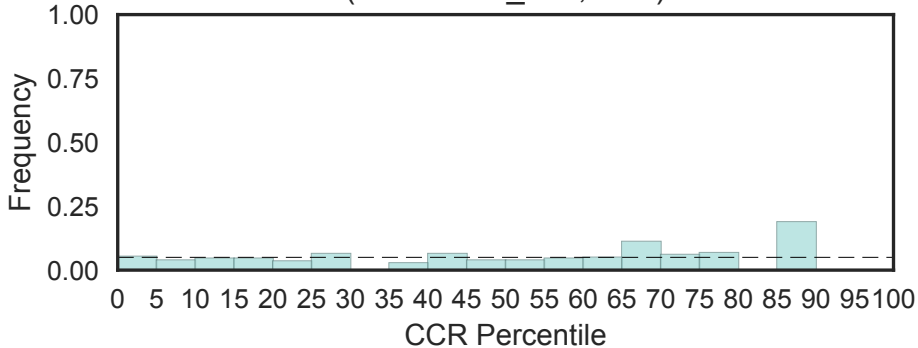

Ribosomal protein L6, N-terminal domain  
(Ribosomal\_L6e\_N, N=1)

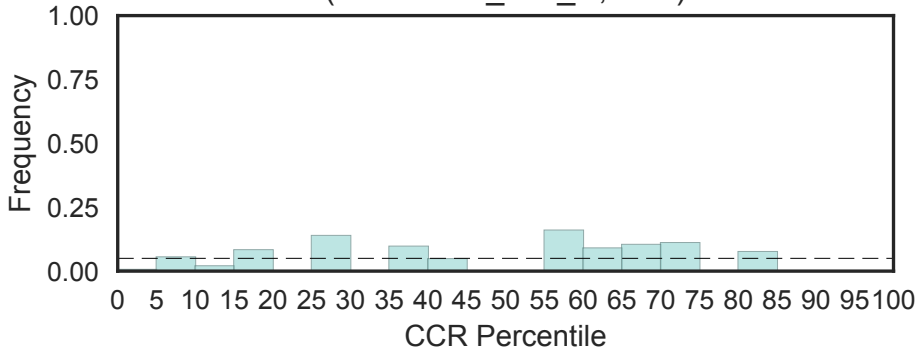

Ribosomal protein L7Ae/L30e/S12e/Gadd45 family  
(Ribosomal\_L7Ae, N=11)

Fisher's OR: 2.4; Bonferroni p-val: 1

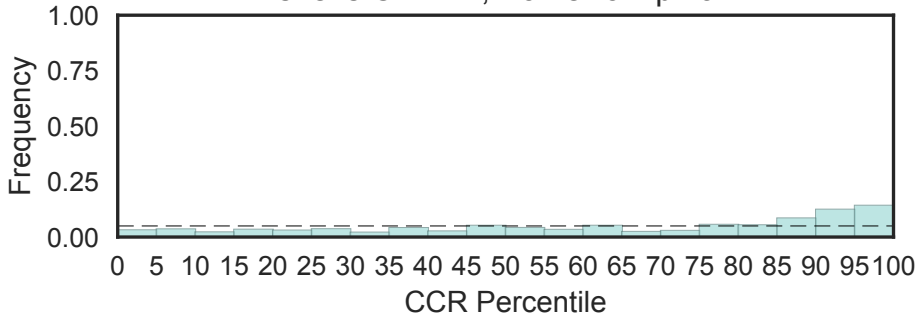

Ribosomal protein L9, N-terminal domain  
(Ribosomal\_L9\_N, N=1)

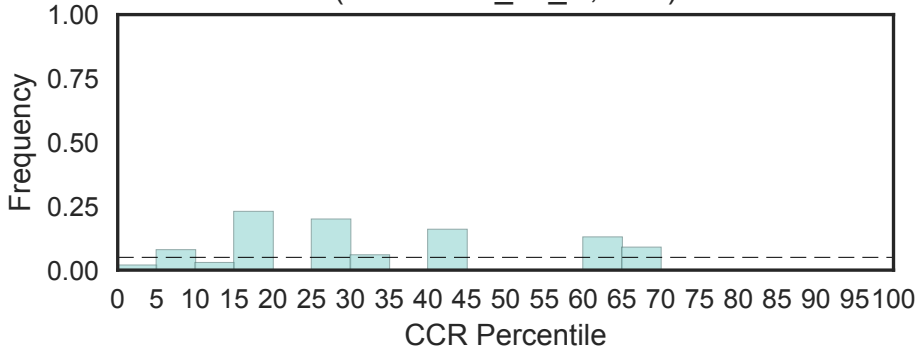

Ribosomal protein S10p/S20e  
(Ribosomal\_S10, N=3)  
Fisher's OR: 1.33; Bonferroni p-val: 1

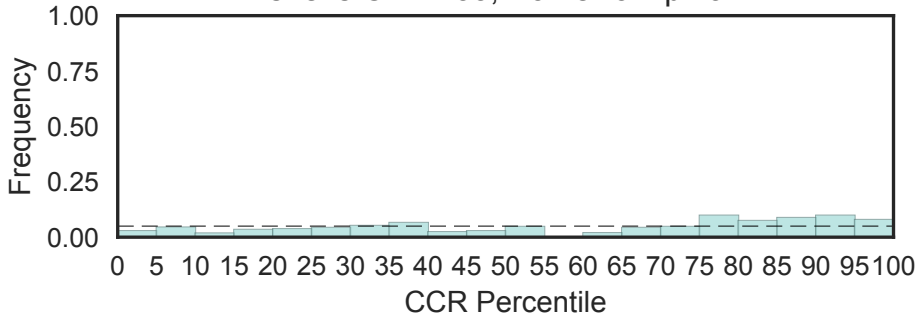



Ribosomal protein S11  
(Ribosomal\_S11, N=2)

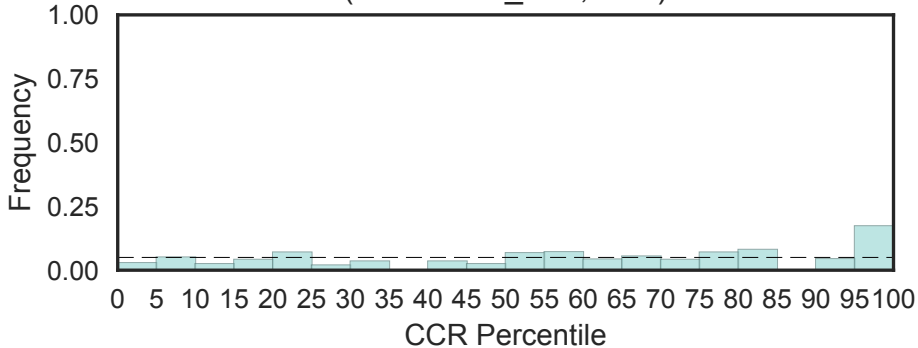

Ribosomal S13/S15 N-terminal domain  
(Ribosomal\_S13\_N, N=1)

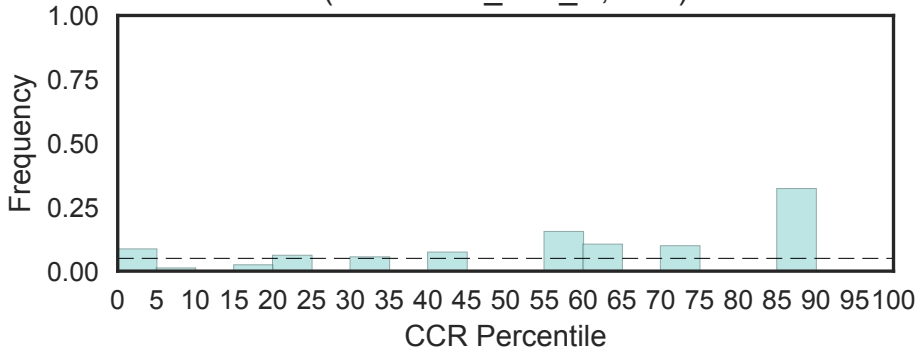

Ribosomal protein S14p/S29e  
(Ribosomal\_S14, N=2)

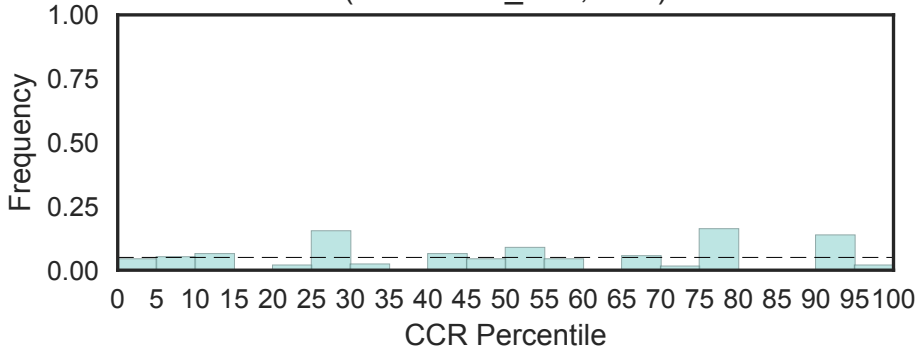

Ribosomal protein S15  
(Ribosomal\_S15, N=2)

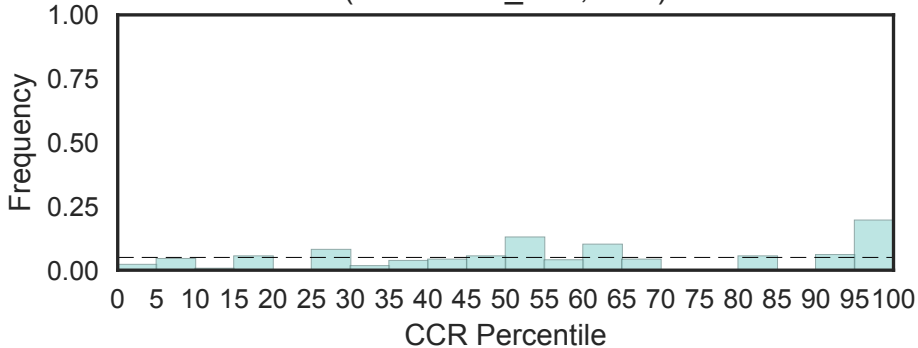

Ribosomal protein S16  
(Ribosomal\_S16, N=1)

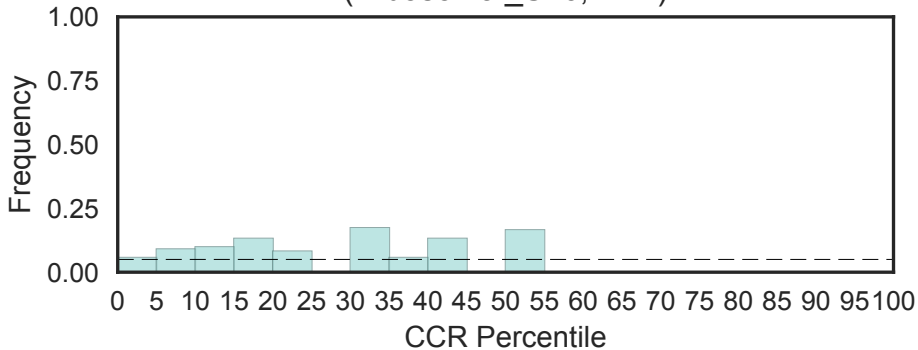

Ribosomal protein S17  
(Ribosomal\_S17, N=2)

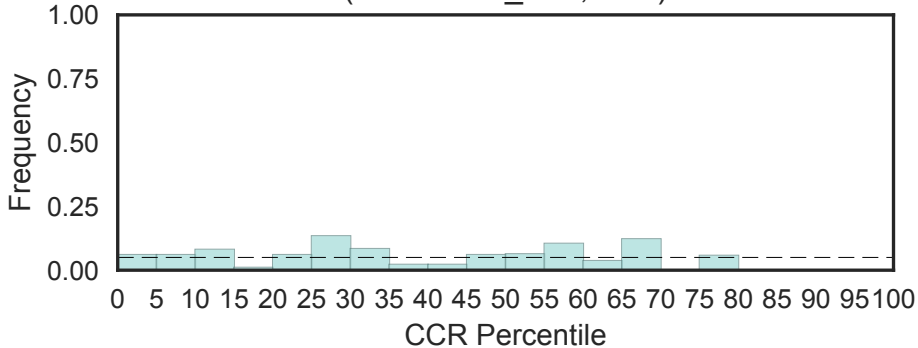

Ribosomal\_S17 N-terminal  
(Ribosomal\_S17\_N, N=1)

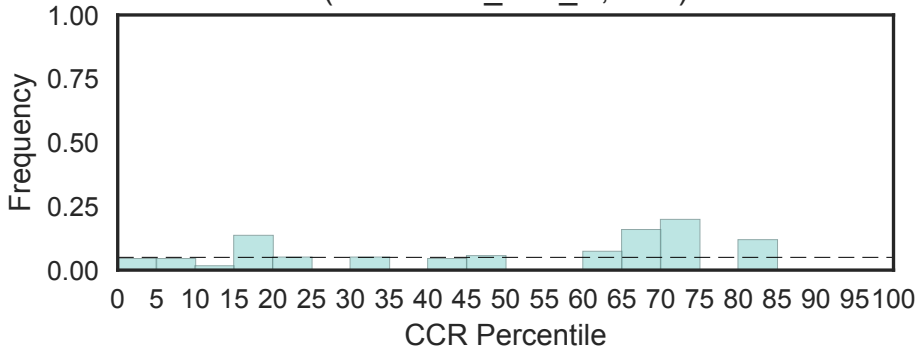

Ribosomal protein S18  
(Ribosomal\_S18, N=3)

Fisher's OR: 0; Bonferroni p-val: 1

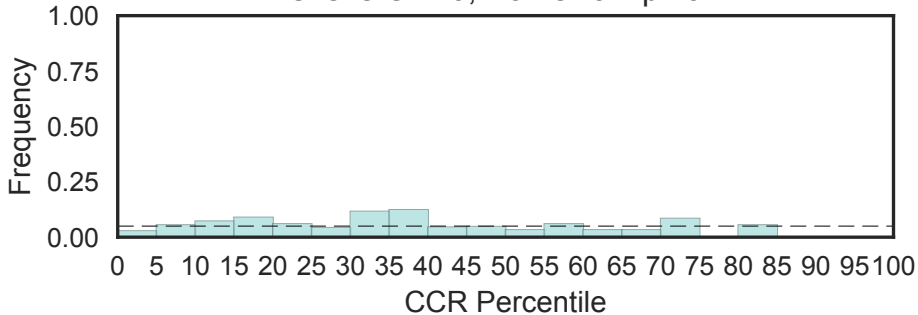



Ribosomal protein S19  
(Ribosomal\_S19, N=1)

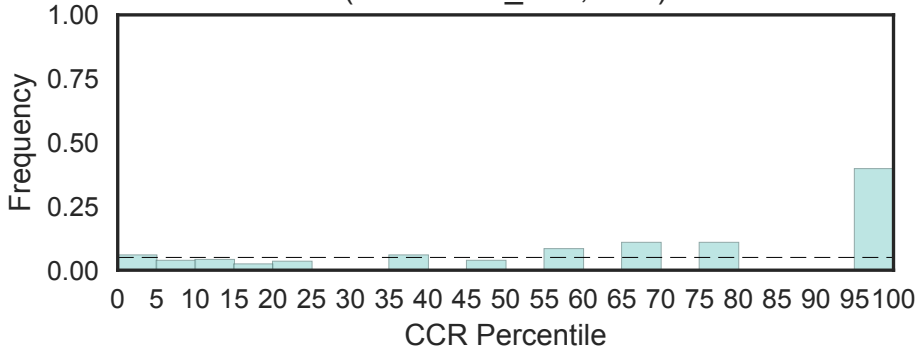

Ribosomal protein S19e  
(Ribosomal\_S19e, N=1)

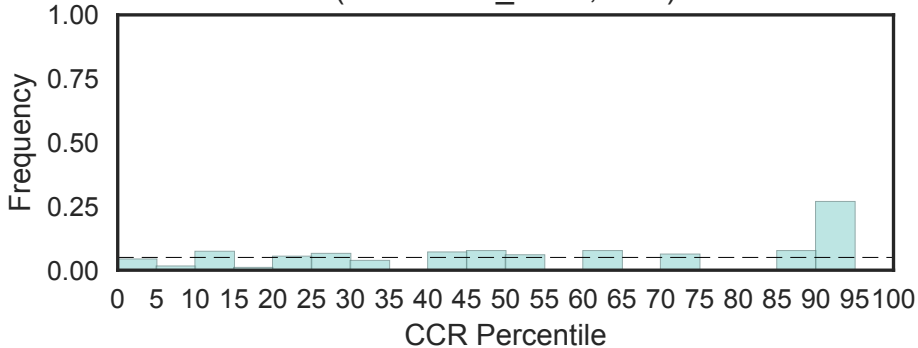

Ribosomal protein S2  
(Ribosomal\_S2, N=6)

Fisher's OR: 0; Bonferroni p-val: 1

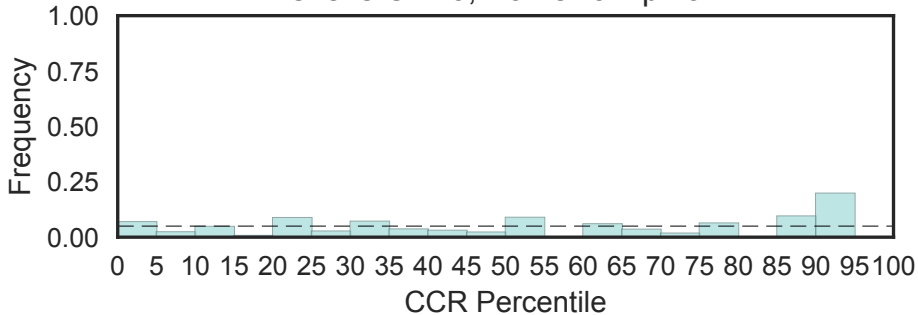

Ribosomal protein S21  
(Ribosomal\_S21, N=1)

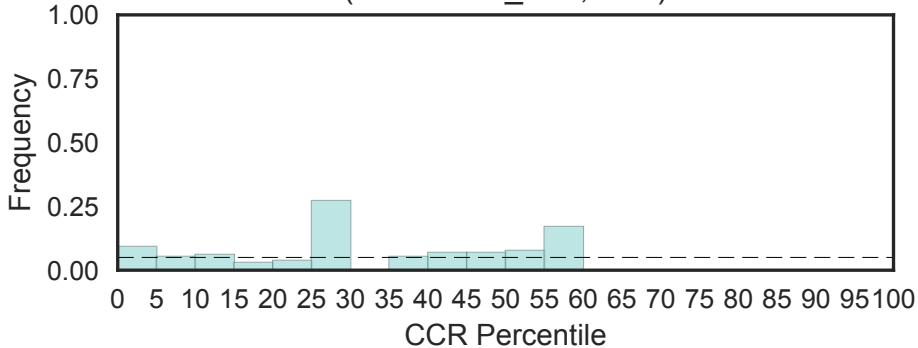

Ribosomal protein S21e  
(Ribosomal\_S21e, N=2)

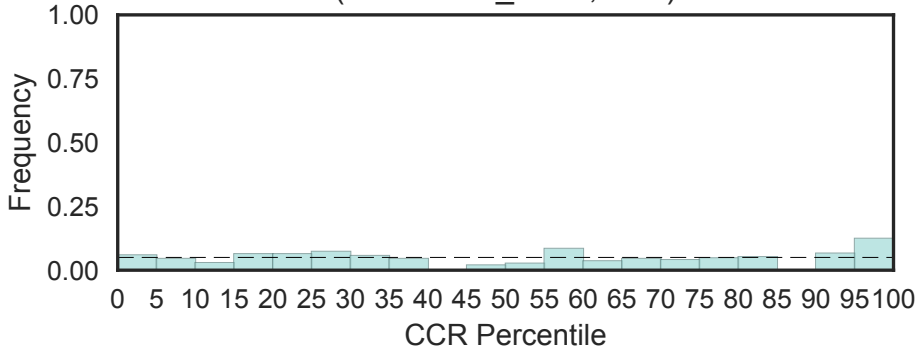

Ribosomal protein S24e  
(Ribosomal\_S24e, N=1)

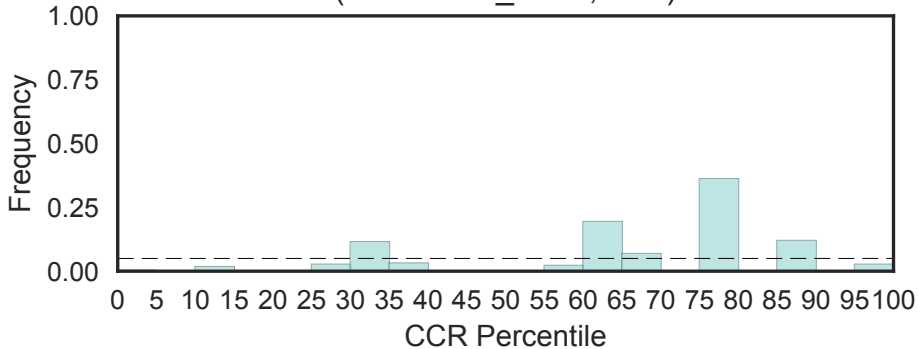

S25 ribosomal protein  
(Ribosomal\_S25, N=1)

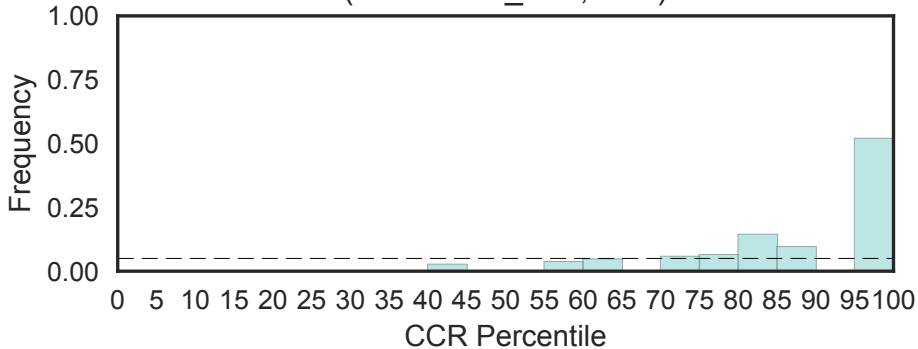

Ribosomal protein S26e  
(Ribosomal\_S26e, N=1)

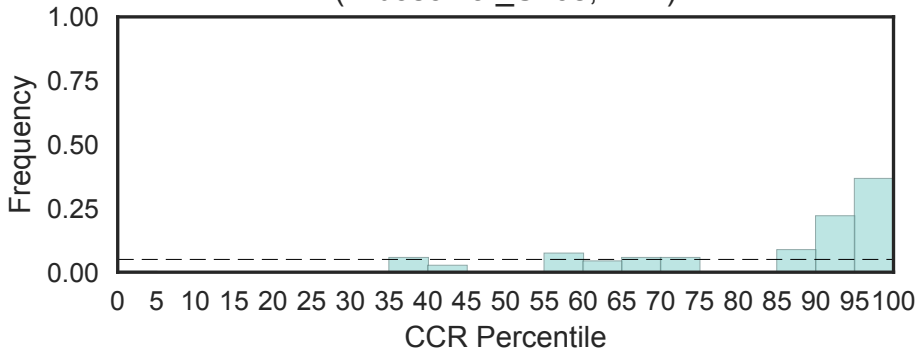



Ribosomal protein S27a  
(Ribosomal\_S27, N=1)

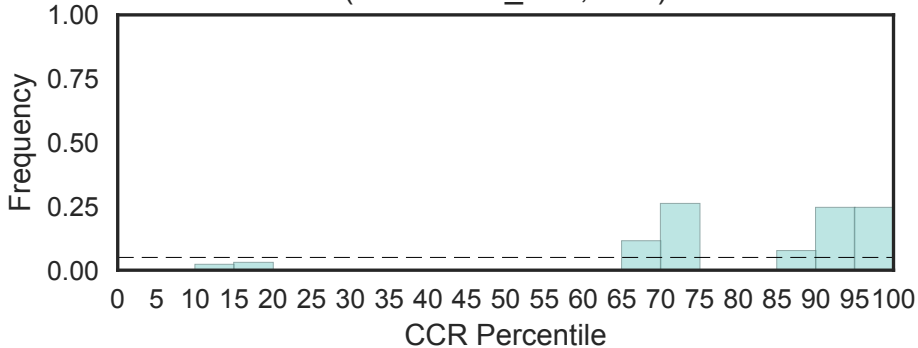

Ribosomal protein S27  
(Ribosomal\_S27e, N=2)

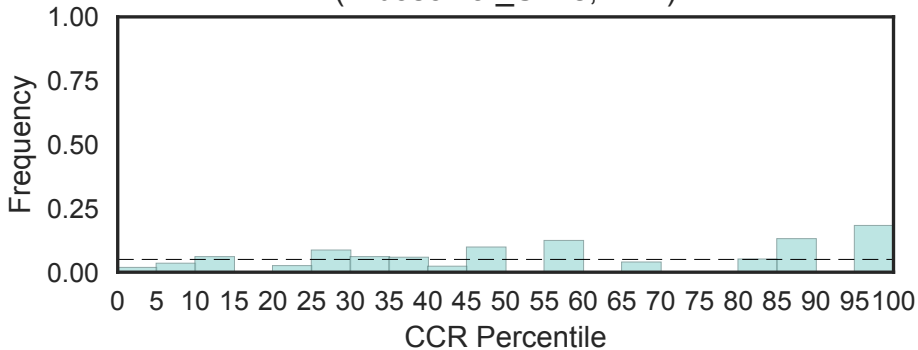

Ribosomal protein S28e  
(Ribosomal\_S28e, N=1)

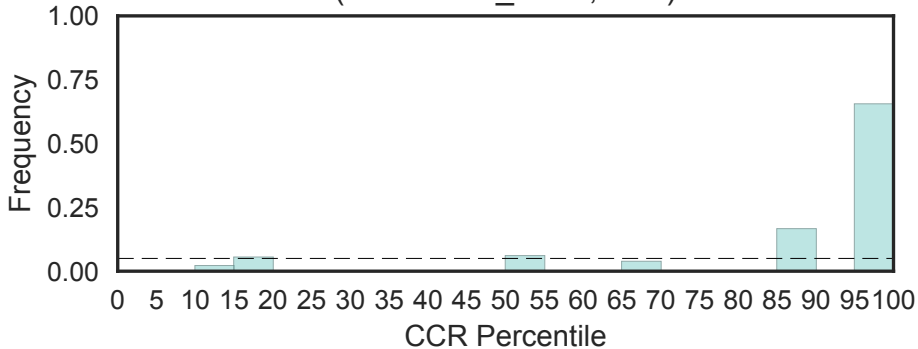

Ribosomal protein S30  
(Ribosomal\_S30, N=1)

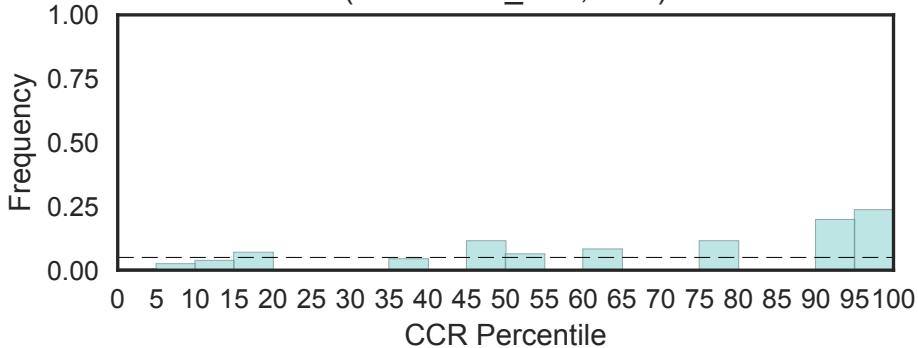

Ribosomal S3Ae family  
(Ribosomal\_S3Ae, N=1)

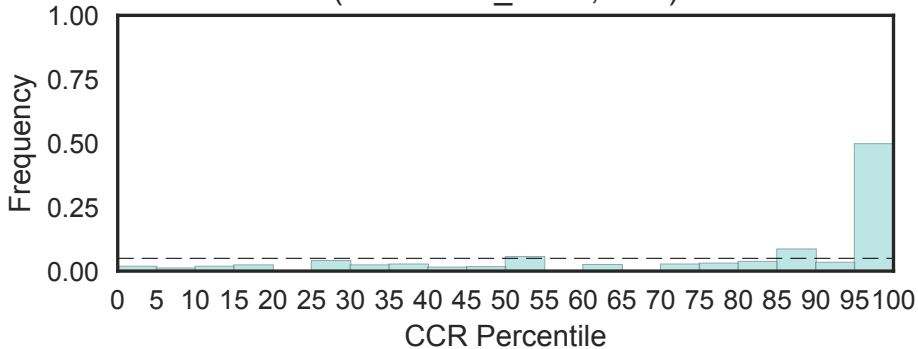

Ribosomal protein S3, C-terminal domain  
(Ribosomal\_S3\_C, N=1)

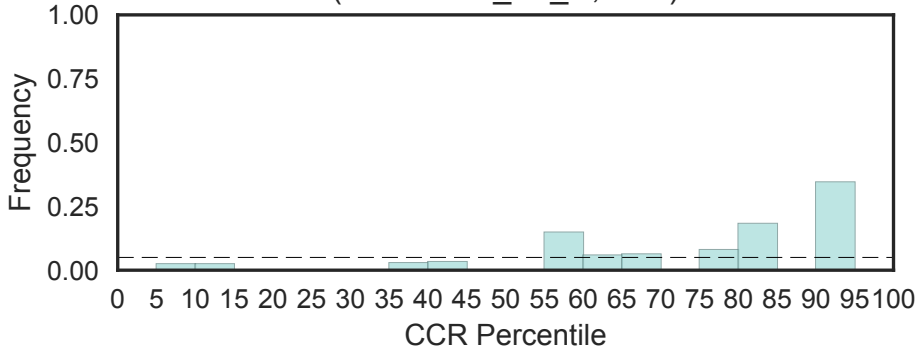

Ribosomal protein S4/S9 N-terminal domain  
(Ribosomal\_S4, N=2)

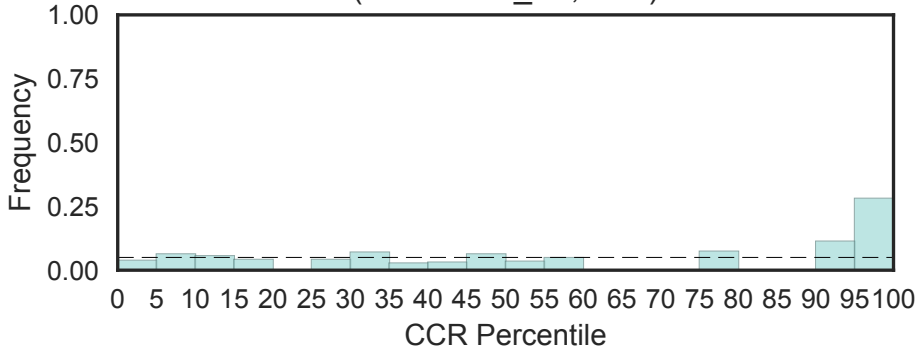

Ribosomal protein S5, N-terminal domain  
(Ribosomal\_S5, N=2)

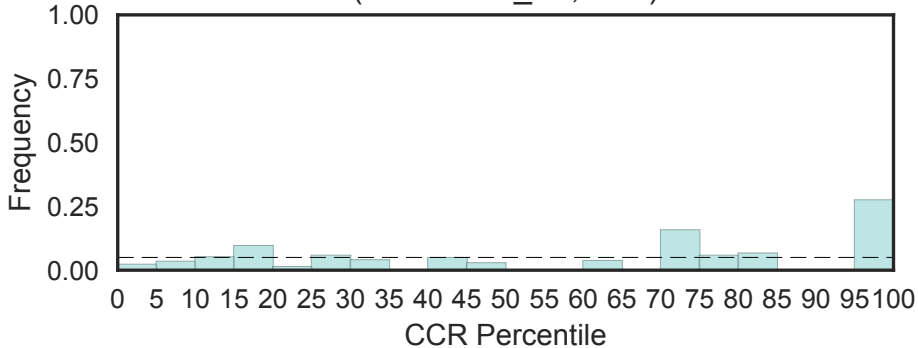



Ribosomal protein S5, C-terminal domain  
(Ribosomal\_S5\_C, N=2)

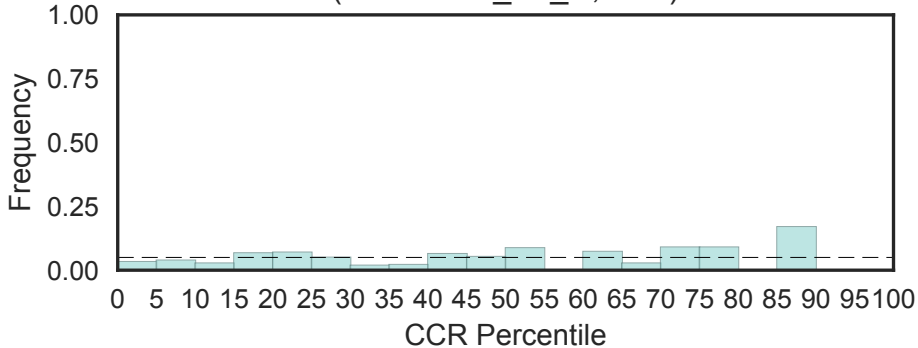

Ribosomal protein S6  
(Ribosomal\_S6, N=2)

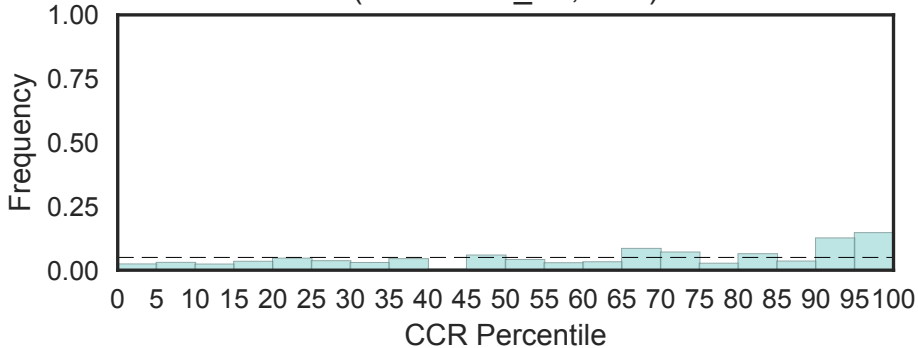

Ribosomal protein S6e  
(Ribosomal\_S6e, N=1)

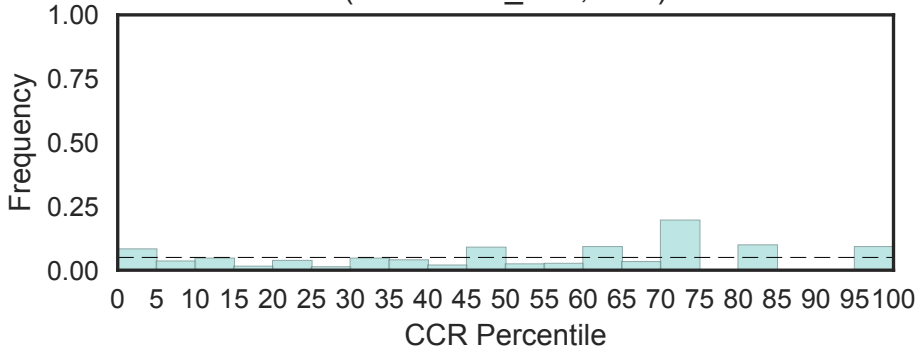

Ribosomal protein S7p/S5e  
(Ribosomal\_S7, N=2)

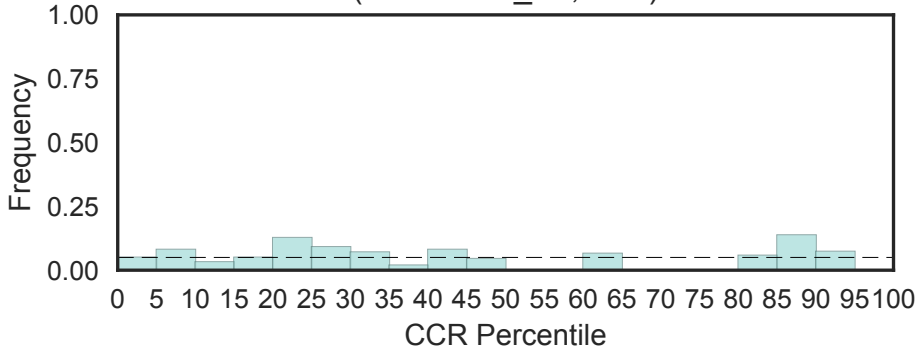

Ribosomal protein S7e  
(Ribosomal\_S7e, N=1)

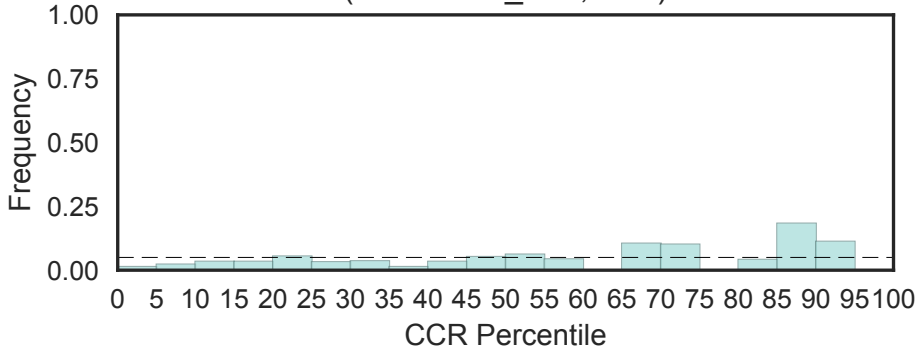

Ribosomal protein S8  
(Ribosomal\_S8, N=2)

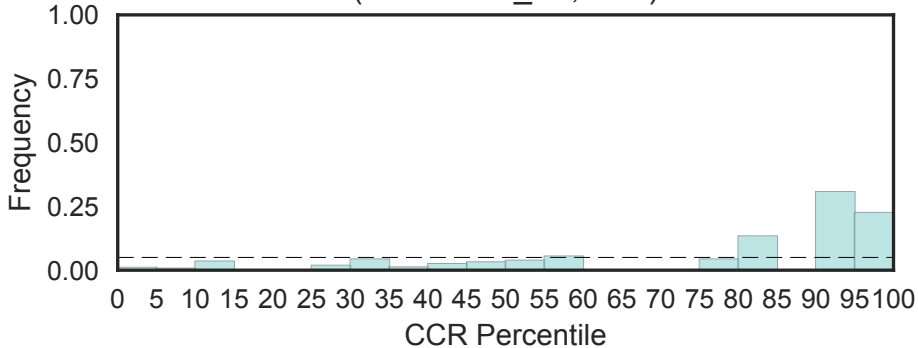

Ribosomal protein S8e  
(Ribosomal\_S8e, N=2)

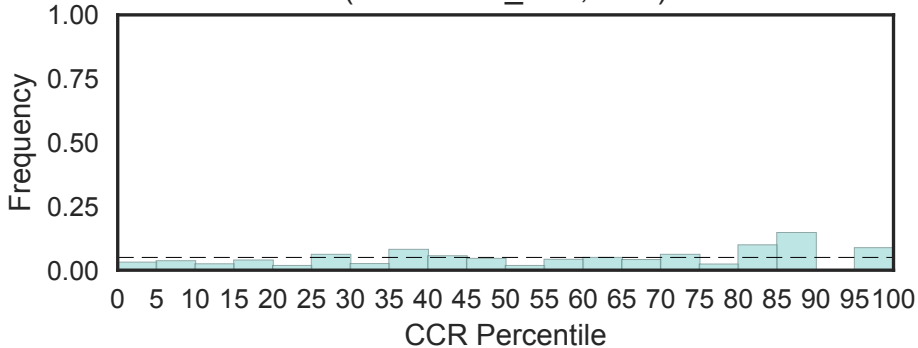

Ribosomal protein S9/S16  
(Ribosomal\_S9, N=2)

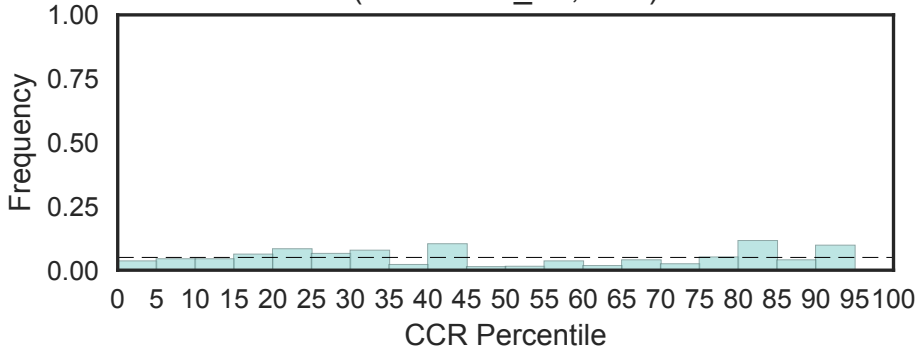



Ribulose-phosphate 3 epimerase family  
(Ribul\_P\_3\_epim, N=2)

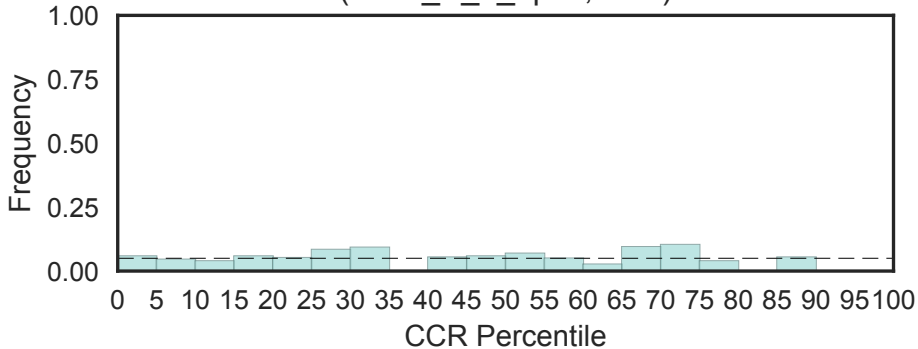

Guanine nucleotide exchange factor synembryn  
(Ric8, N=2)

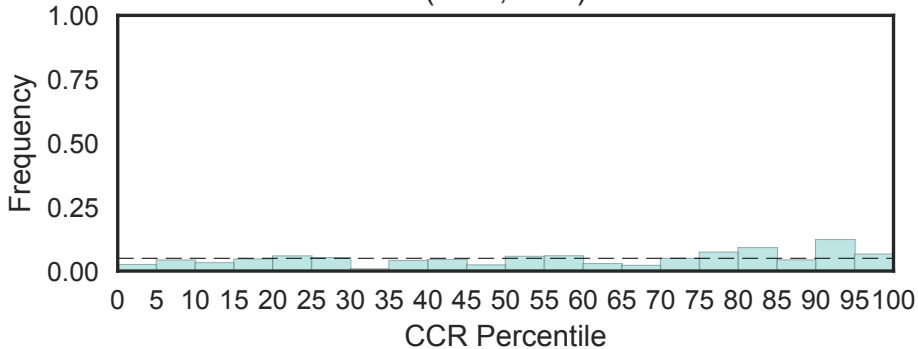

Ricin-type beta-trefoil lectin domain-like  
(RicinB\_lectin\_2, N=1)

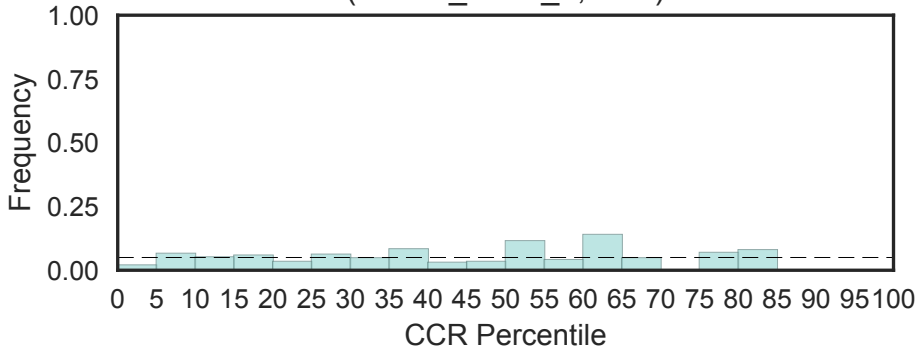

Ricin-type beta-trefoil lectin domain  
(Ricin\_B\_lectin, N=24)  
Fisher's OR: 0.544; Bonferroni p-val: 1

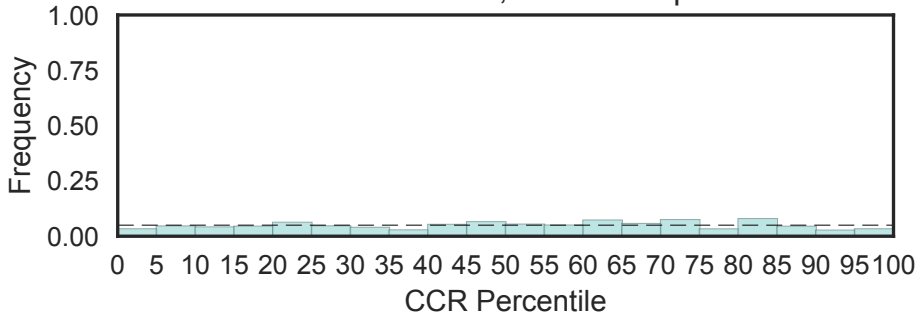

Rieske [2Fe-2S] domain  
(Rieske, N=3)

Fisher's OR: 0; Bonferroni p-val: 1

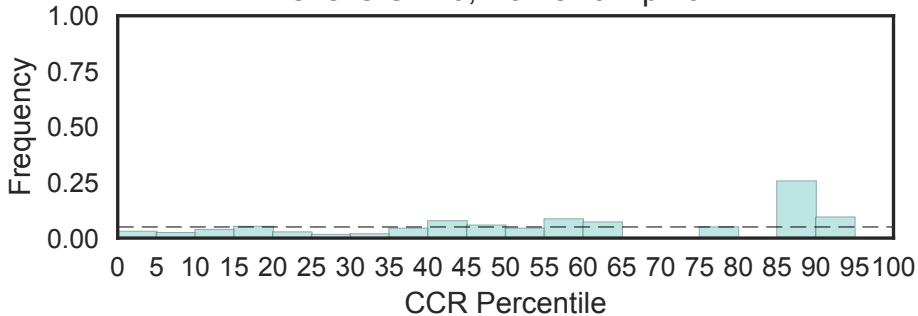

Rieske-like [2Fe-2S] domain  
(Rieske\_2, N=2)

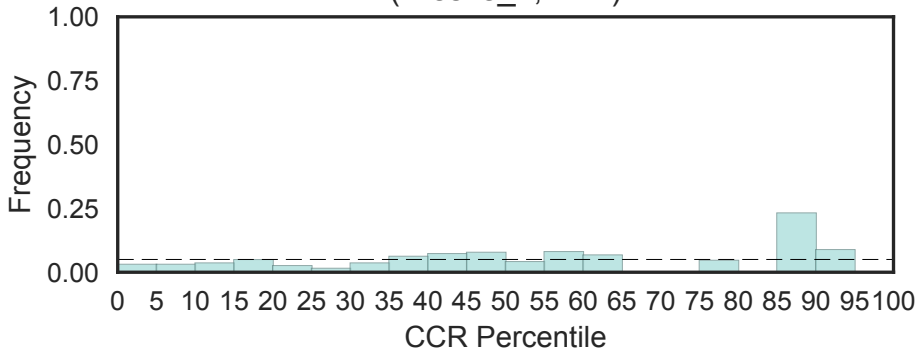

Rap1-interacting factor 1 N terminal  
(Rif1\_N, N=1)

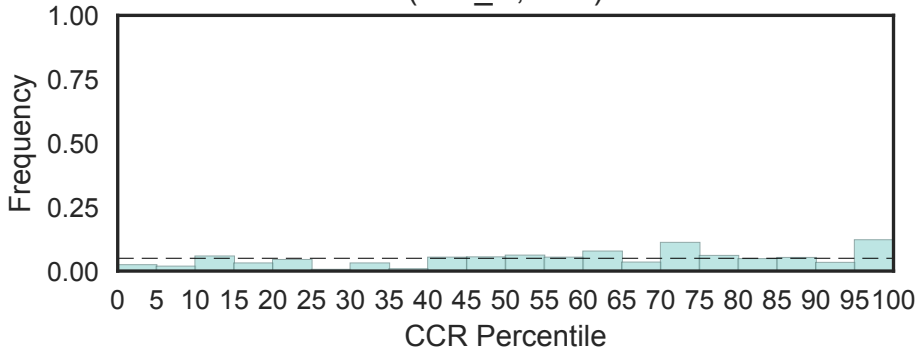

RimK-like ATP-grasp domain  
(RimK, N=5)

Fisher's OR: 0; Bonferroni p-val: 1

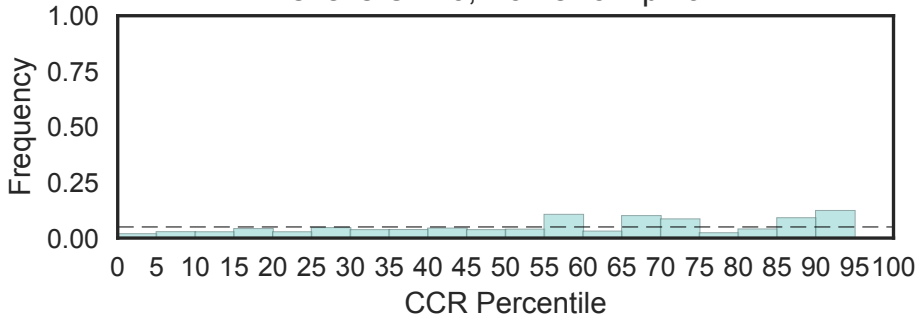



Rio2, N-terminal  
(Rio2\_N, N=2)

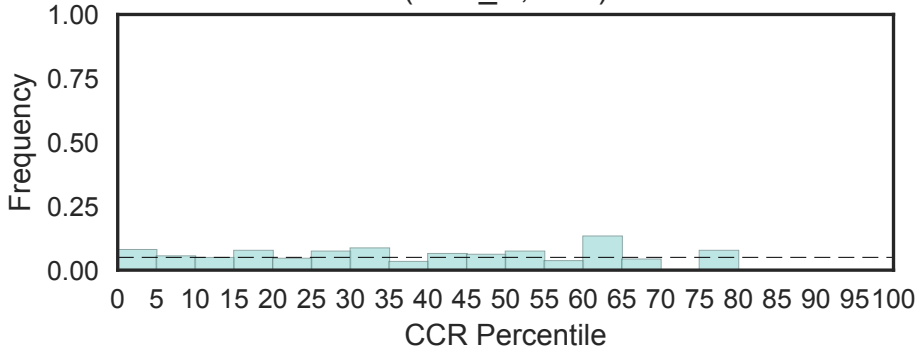

# Transcription Regulator (Ripply, N=2)

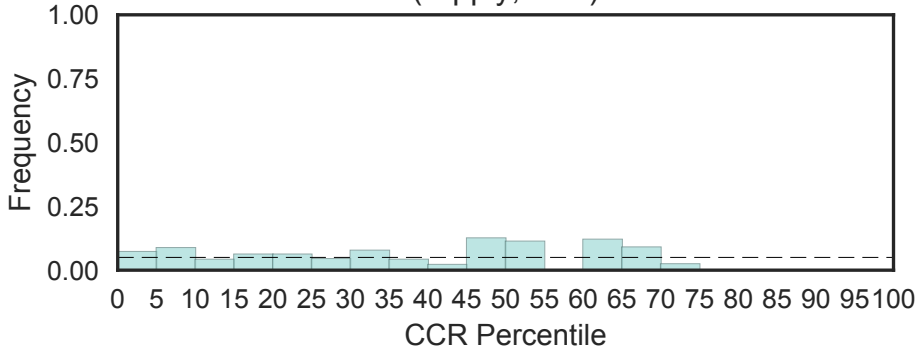

RmID substrate binding domain  
(RmID\_sub\_bind, N=11)  
Fisher's OR: 0.597; Bonferroni p-val: 1

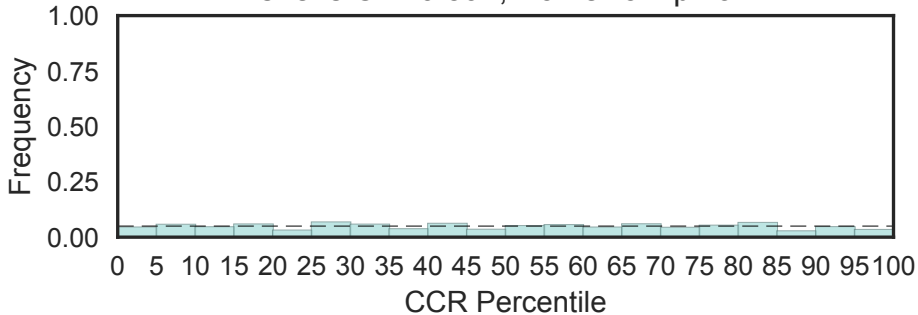

Pancreatic ribonuclease  
(RnaseA, N=18)

Fisher's OR: 0; Bonferroni p-val: 1

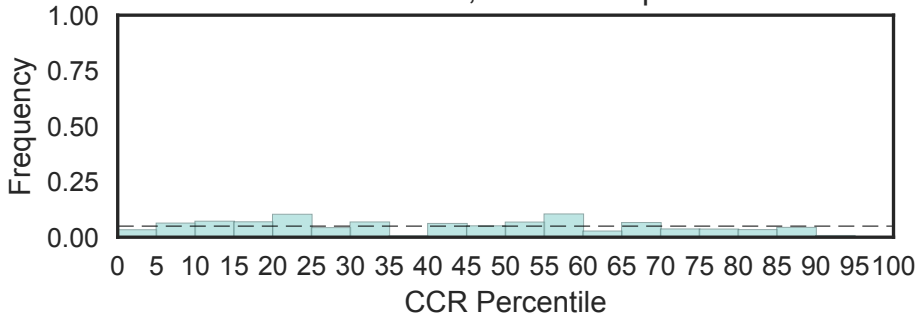

# Roadblock/LC7 domain

(Robl\_LC7, N=3)

Fisher's OR: 0; Bonferroni p-val: 1

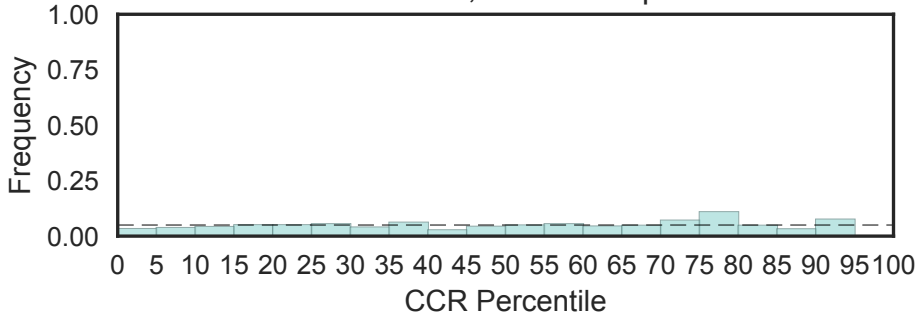

Ras of Complex, Roc, domain of DAPkinase  
(Roc, N=160)

Fisher's OR: 3.29; Bonferroni p-val: 9.22e-30

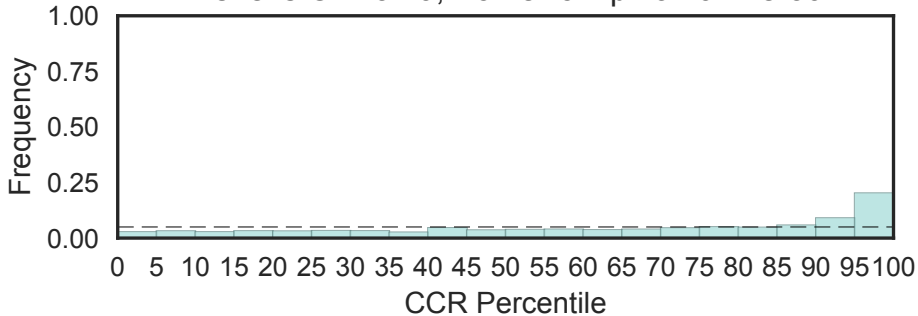

Rough deal protein C-terminal region  
(Rod\_C, N=1)

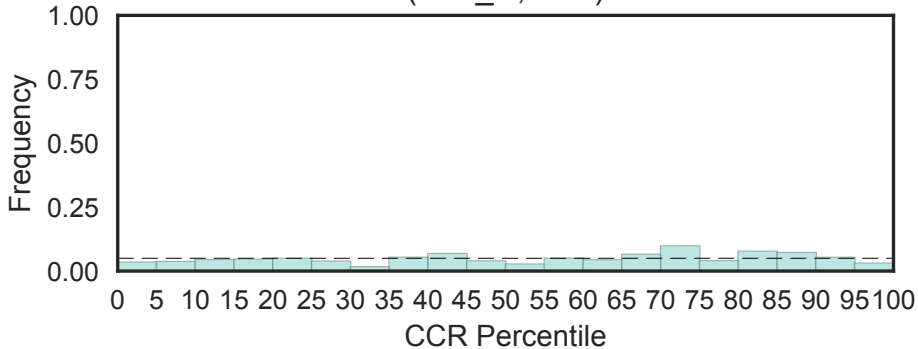

Progressive rod-cone degeneration  
(Rod\_cone\_degen, N=1)

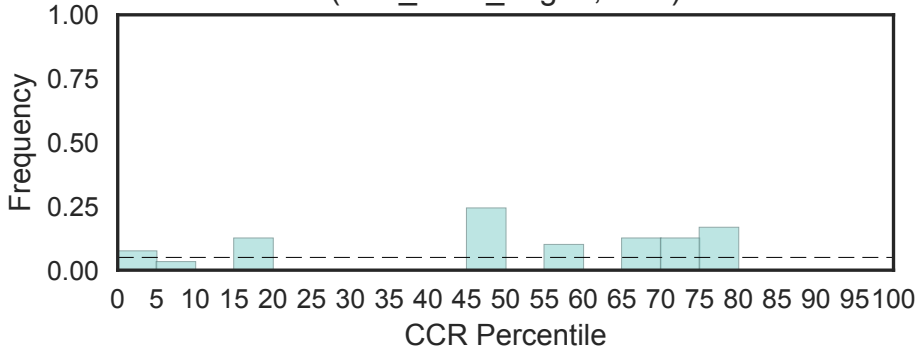



Rogdi leucine zipper containing protein  
(Rogdi\_1z, N=1)

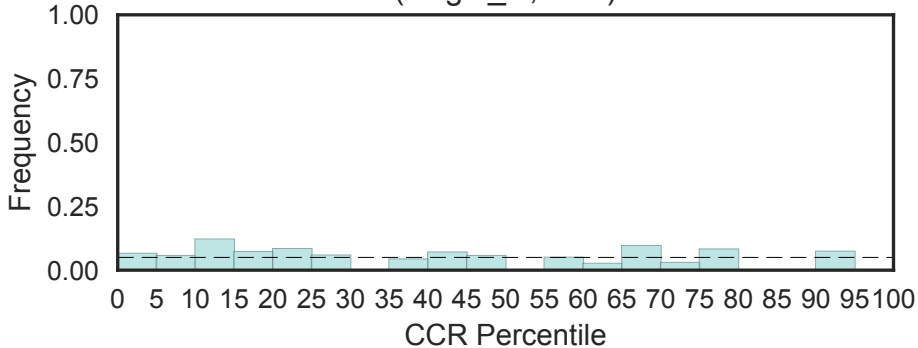

# Reactive mitochondrial oxygen species modulator 1 (Romo1, N=1)

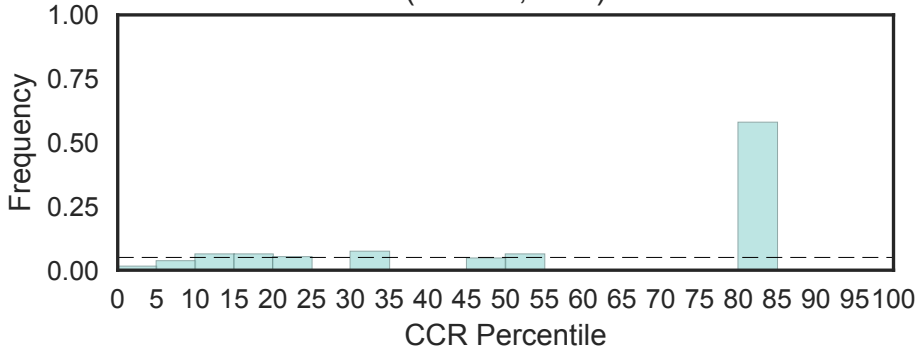

Ciliary rootlet component, centrosome cohesion  
(Rootletin, N=2)

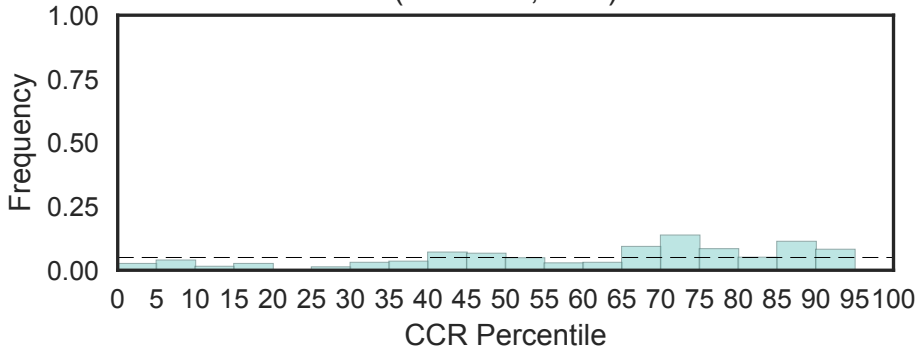

PPIC-type PPIASE domain  
(Rotamase, N=1)

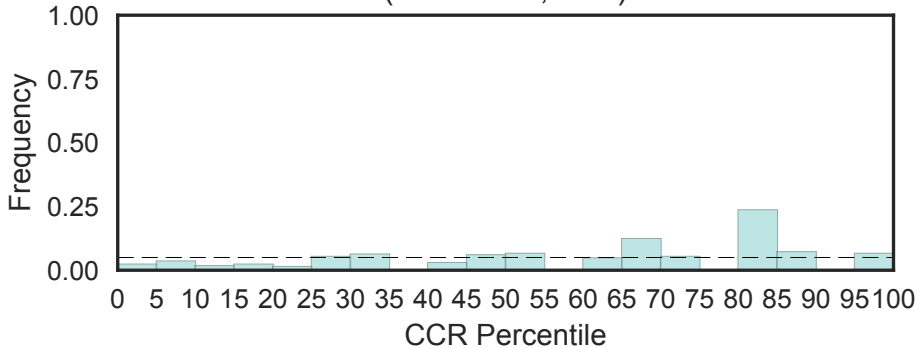

PPIC-type PPIASE domain  
(Rotamase\_3, N=1)

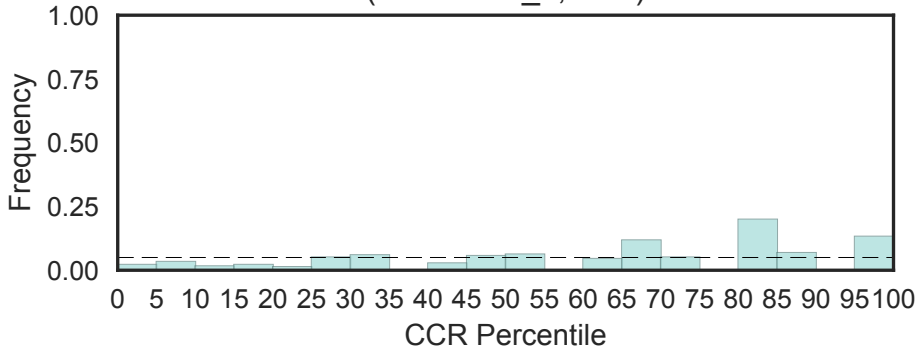

Proteasome regulatory subunit C-terminal  
(Rpn3\_C, N=1)

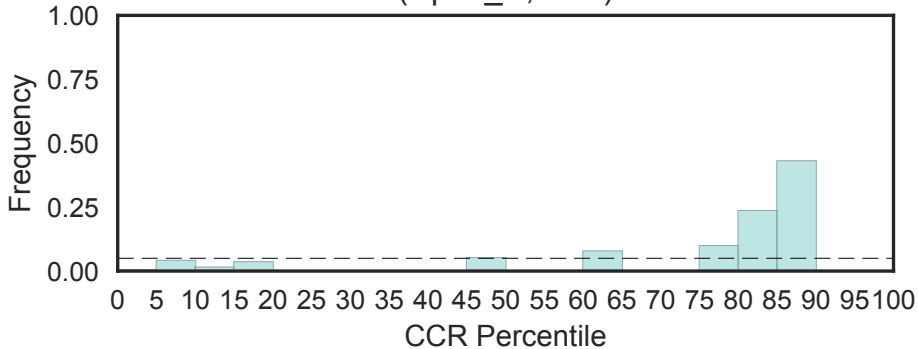

Rpp20 subunit of nuclear RNase MRP and P  
(Rpp20, N=1)

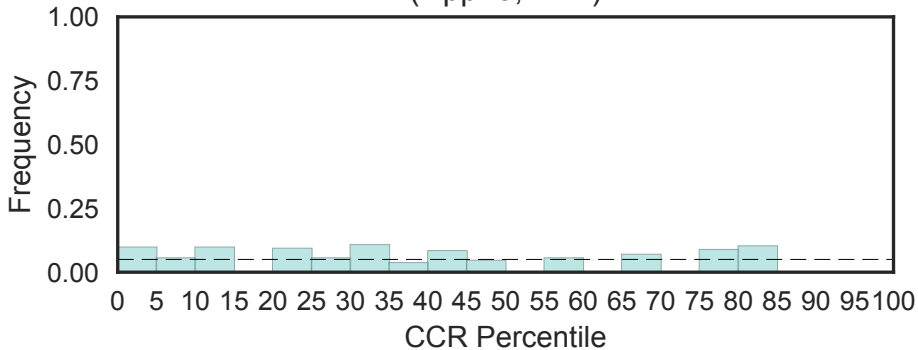

Ribosomal RNA adenine dimethylase  
(RrnaAD, N=4)

Fisher's OR: 0.259; Bonferroni p-val: 1

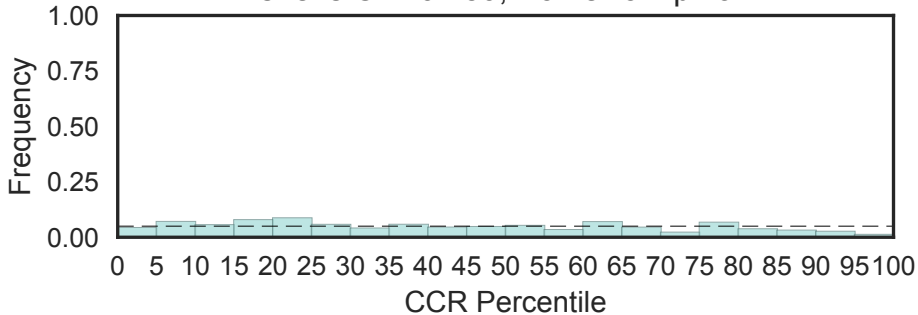



Rrp15p  
(Rrp15p, N=1)

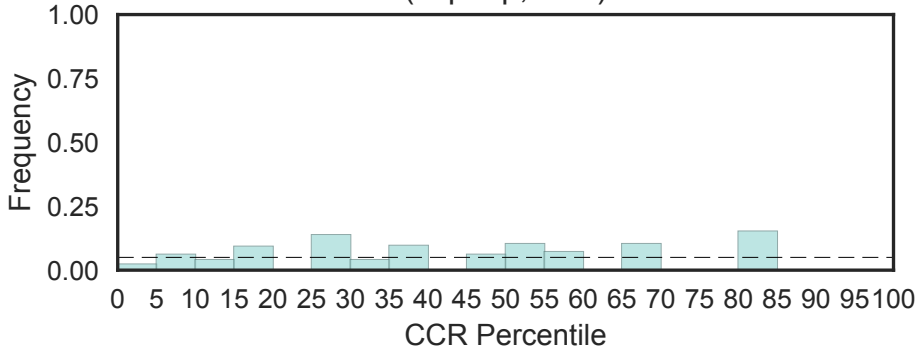

# Rrp44-like cold shock domain

(Rrp44\_CSD1, N=3)

Fisher's OR: 1.2; Bonferroni p-val: 1

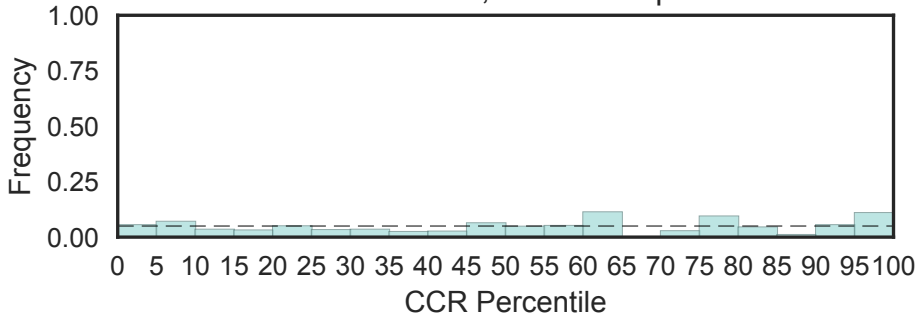

S1 domain  
(Rrp44\_S1, N=2)

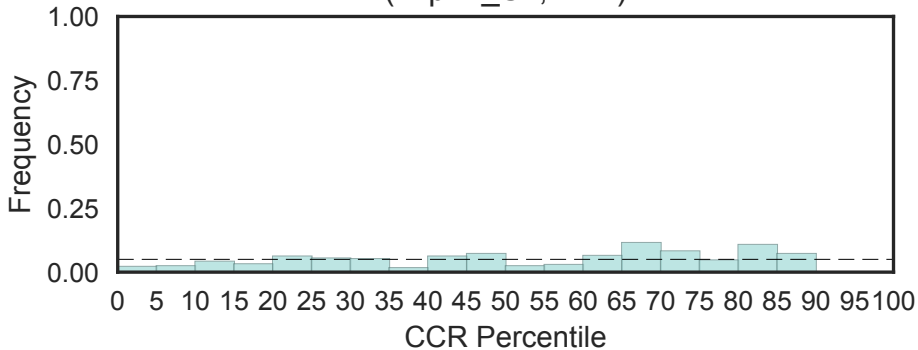

# Ribosomal silencing factor during starvation (RsfS, N=1)

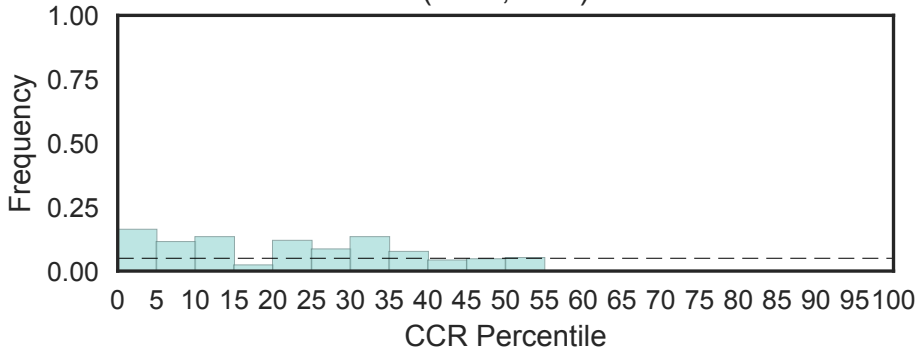

Rsm1-like  
(Rsm1, N=2)

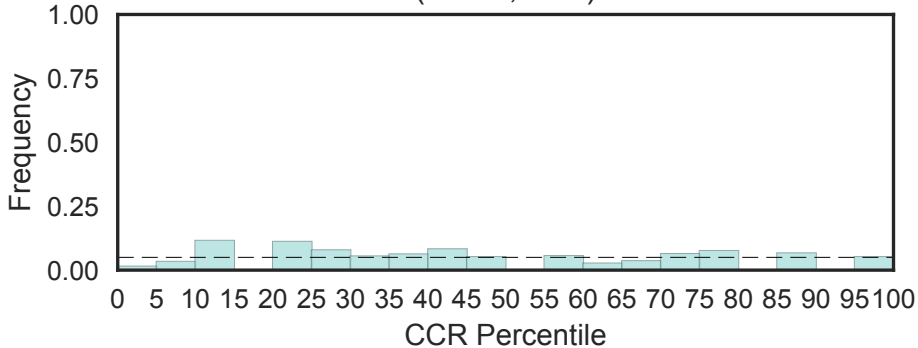

Mitochondrial small ribosomal subunit Rsm22  
(Rsm22, N=1)

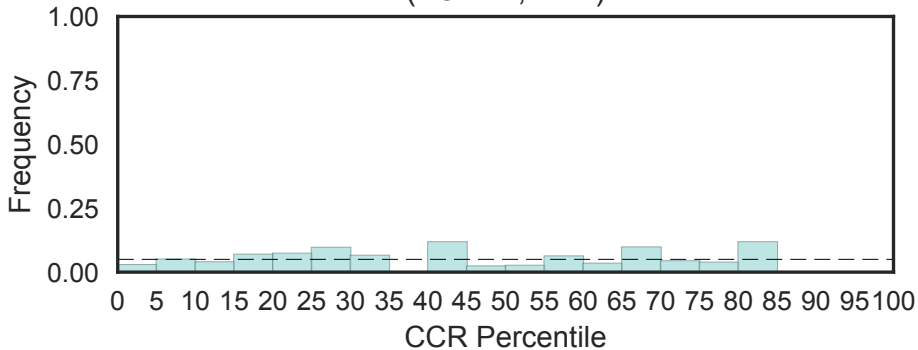

tRNA-splicing ligase RtcB  
(RtcB, N=1)

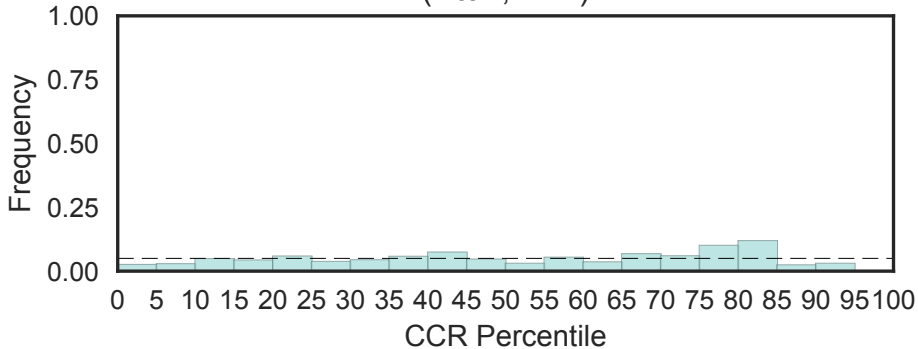

Rtf2 RING-finger  
(Rtf2, N=2)

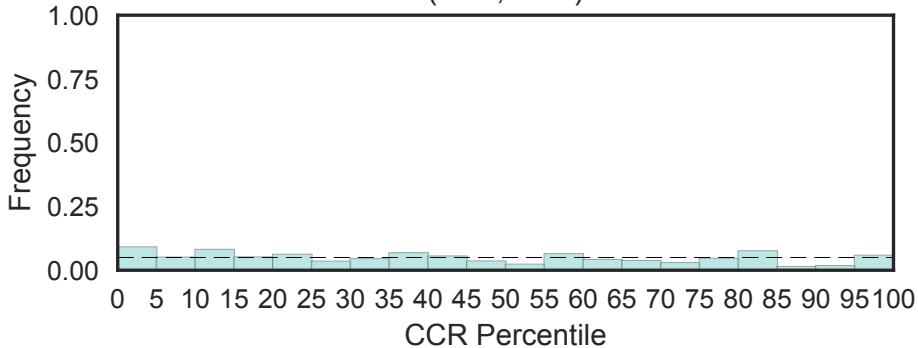



# Histone chaperone Rttp106-like (Rtt106, N=2)

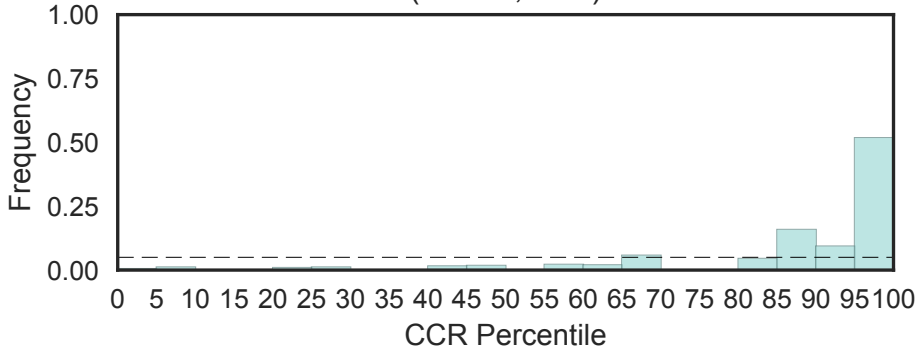

Rubisco LSMT substrate-binding  
(Rubis-sub-bind, N=3)  
Fisher's OR: 0; Bonferroni p-val: 1

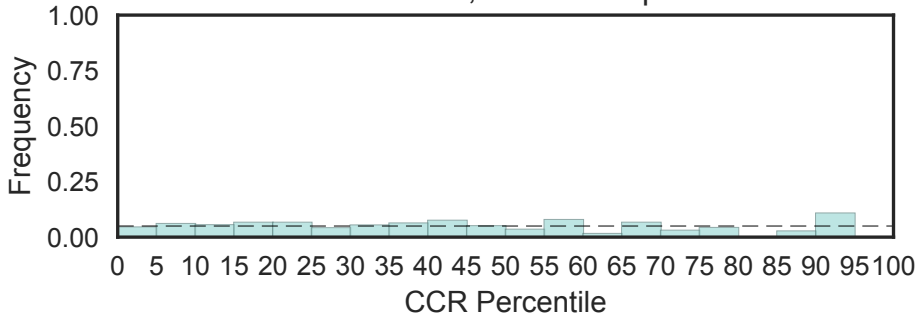

Runt domain  
(Runt, N=3)

Fisher's OR: 7.66; Bonferroni p-val: 0.108

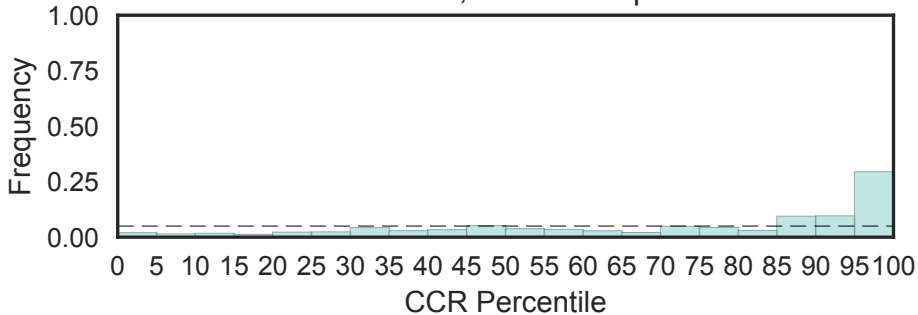

Runx inhibition domain  
(Runx1, N=3)

Fisher's OR: 0; Bonferroni p-val: 1

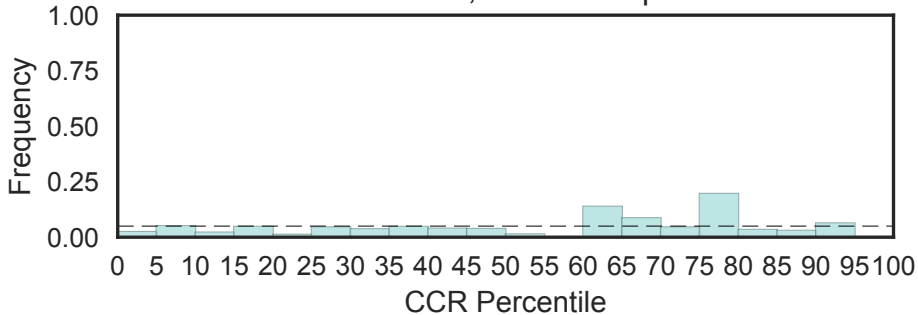

Holliday junction DNA helicase ruvB N-terminus  
(RuvB\_N, N=28)

Fisher's OR: 4.48; Bonferroni p-val: 5.14e-05

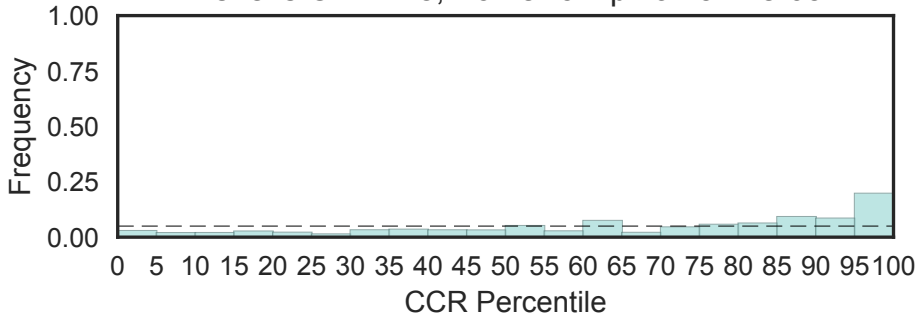

RyR domain  
(RyR, N=12)

Fisher's OR: 0.303; Bonferroni p-val: 1

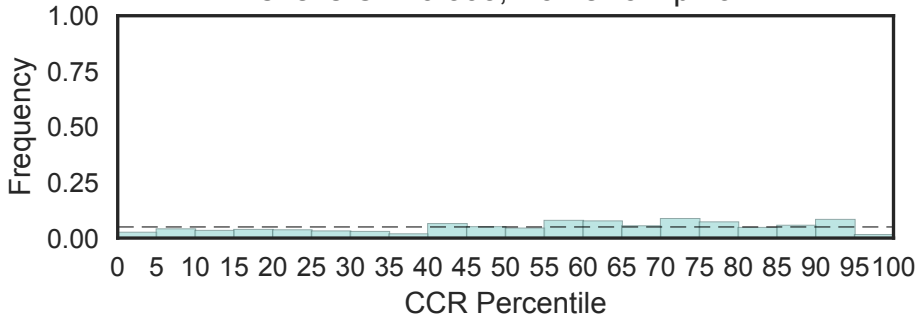

S-adenosylmethionine synthetase, C-terminal domain  
(S-AdoMet\_synt\_C, N=2)

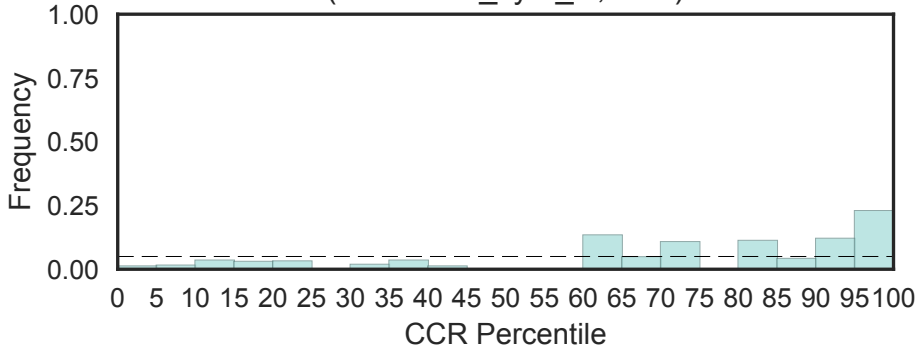

S-adenosylmethionine synthetase, central domain  
(S-AdoMet\_synt\_M, N=2)

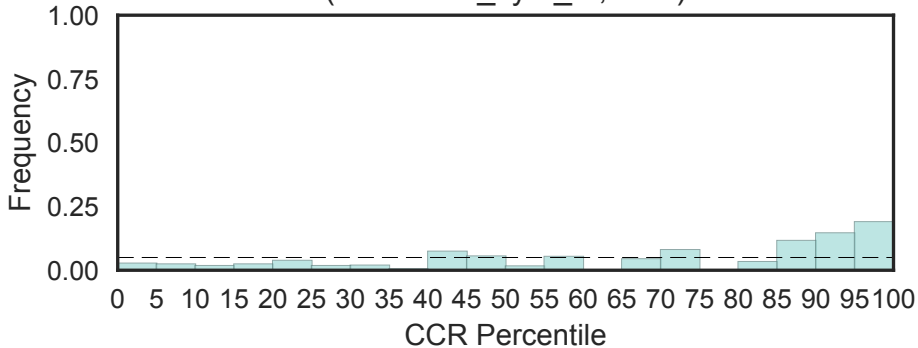



S-adenosylmethionine synthetase, N-terminal domain  
(S-AdoMet\_synt\_N, N=2)

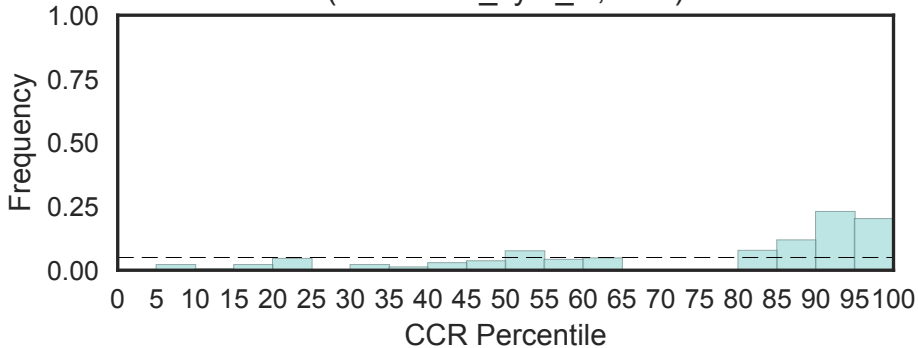

# Homocysteine S-methyltransferase

(S-methyl\_trans, N=3)

Fisher's OR: 0; Bonferroni p-val: 1

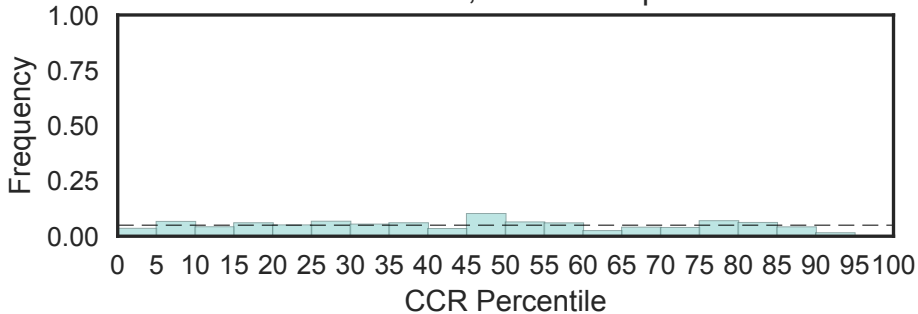

S1 RNA binding domain  
(S1, N=11)

Fisher's OR: 2; Bonferroni p-val: 1

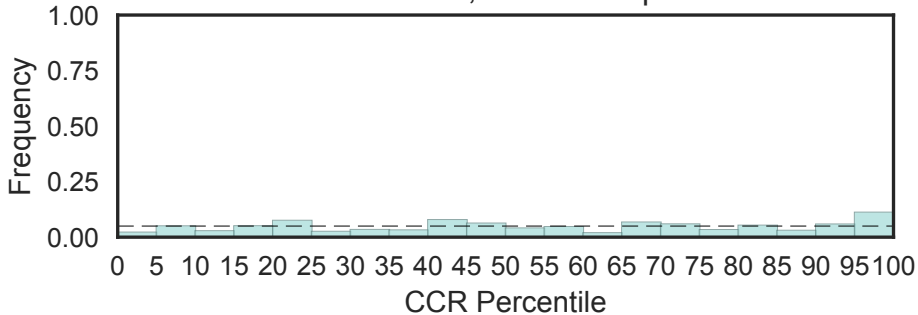

S1-like  
(S1-like, N=2)

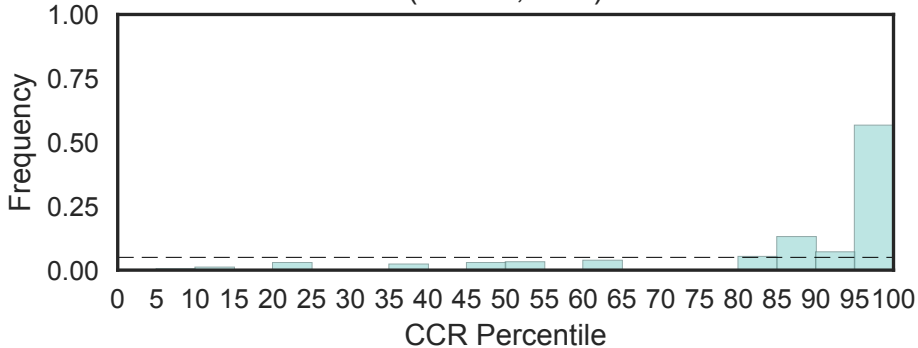

S100P-binding protein  
(S100PBPR, N=1)

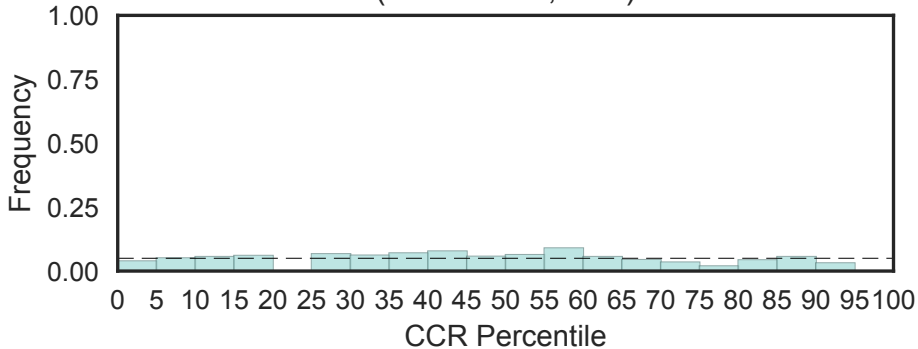

Plectin/S10 domain  
(S10\_plectin, N=3)  
Fisher's OR: 0; Bonferroni p-val: 1

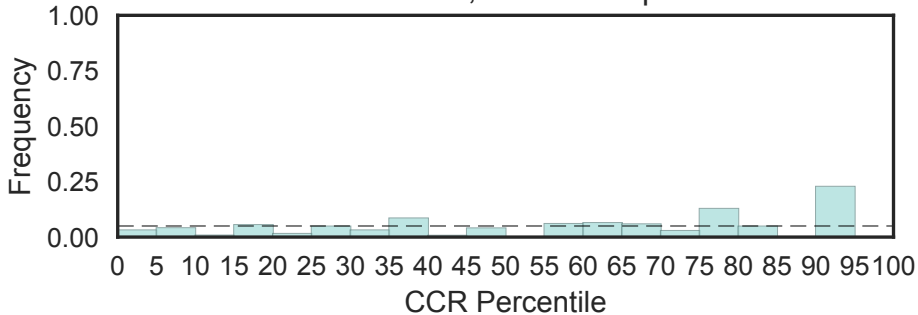

S4 domain  
(S4, N=2)

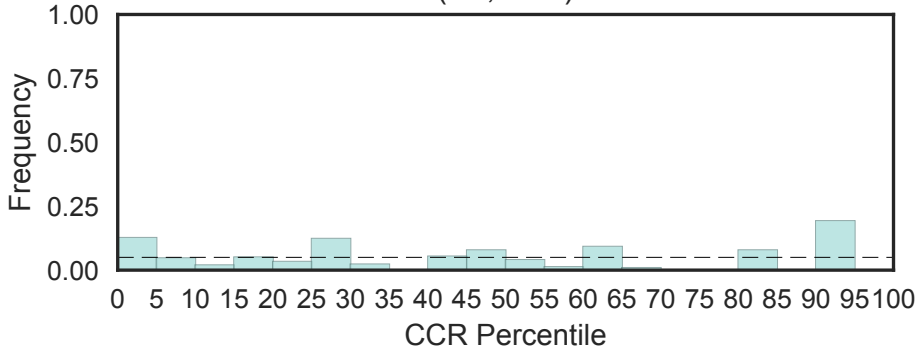

Six6 opposite strand transcript 1 family  
(S6OS1, N=1)

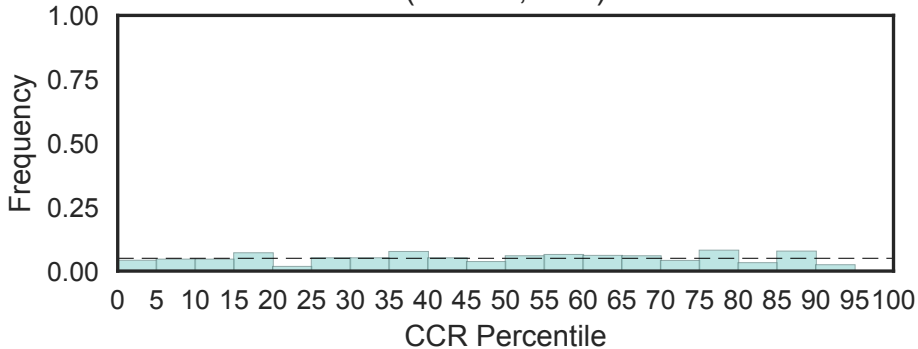



Peptidase S8 pro-domain  
(S8\_pro-domain, N=7)

Fisher's OR: 0; Bonferroni p-val: 1

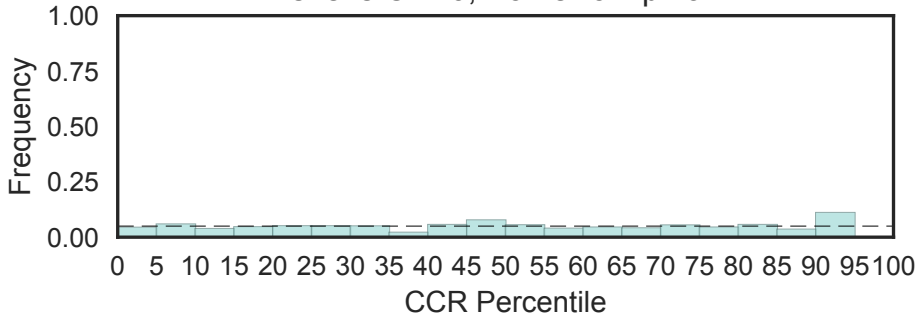

Serum amyloid A protein  
(SAA, N=4)

Fisher's OR: 0; Bonferroni p-val: 1

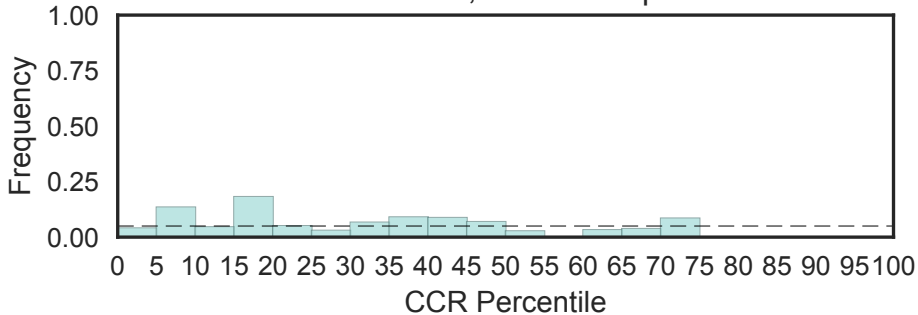

SAB domain  
(SAB, N=4)

Fisher's OR: 0; Bonferroni p-val: 1

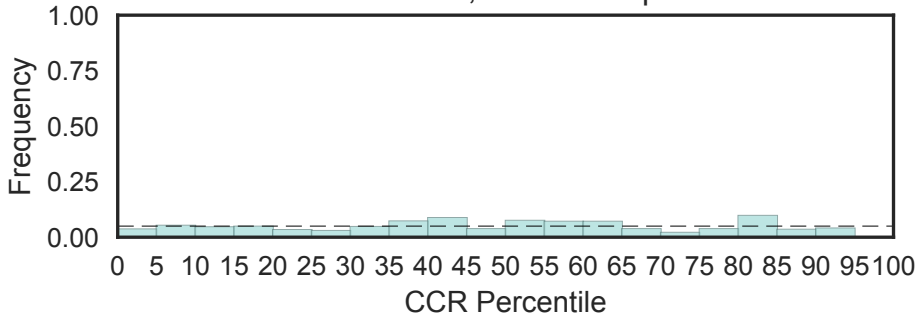

SAC3/GANP family  
(SAC3\_GANP, N=3)

Fisher's OR: 1.24; Bonferroni p-val: 1

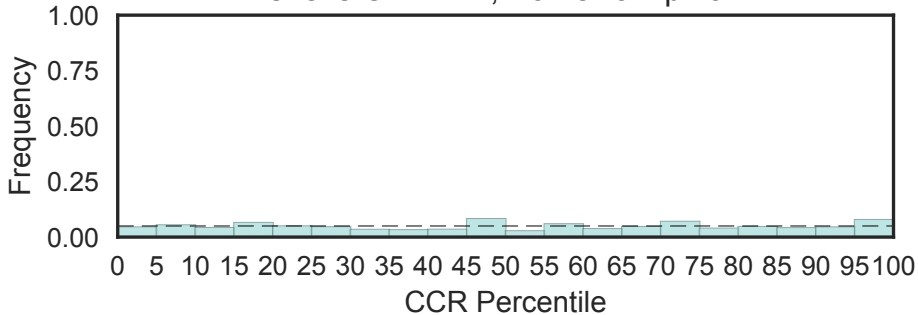

SAD/SRA domain  
(SAD\_SRA, N=1)

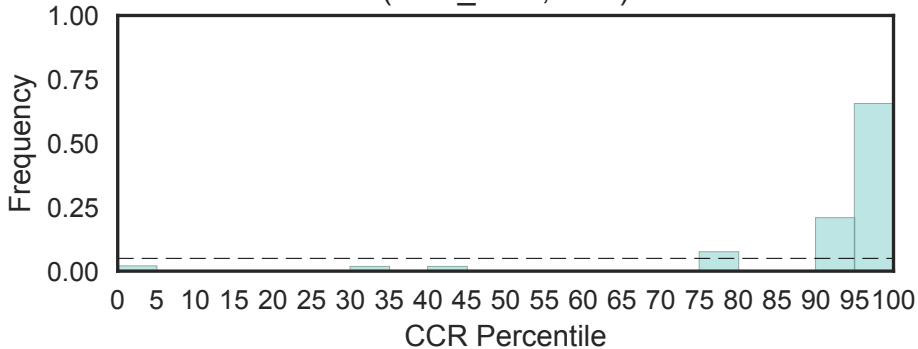

DNA repair protein endonuclease SAE2/CtIP C-terminus  
(SAE2, N=1)

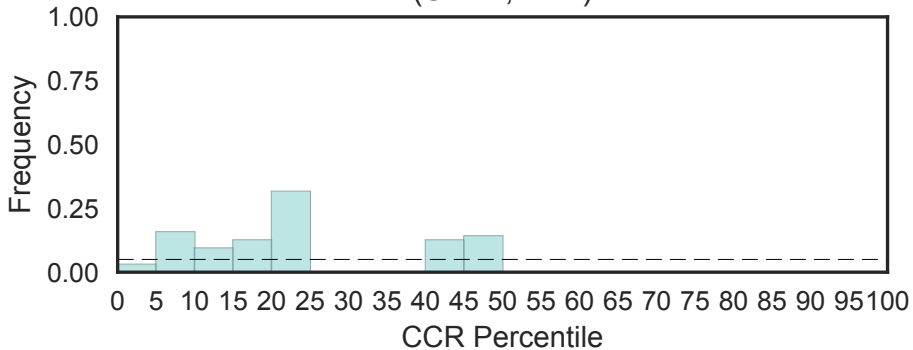

Transcriptional regulator of RNA polII, SAGA, subunit  
(SAGA-Tad1, N=2)

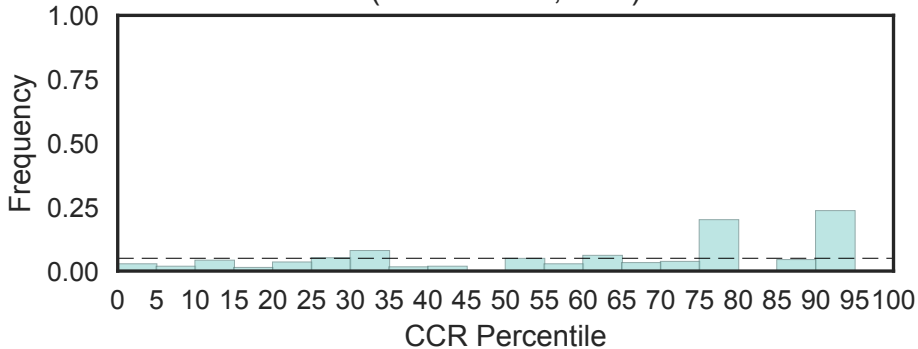

SAICAR synthetase  
(SAICAR\_synt, N=1)

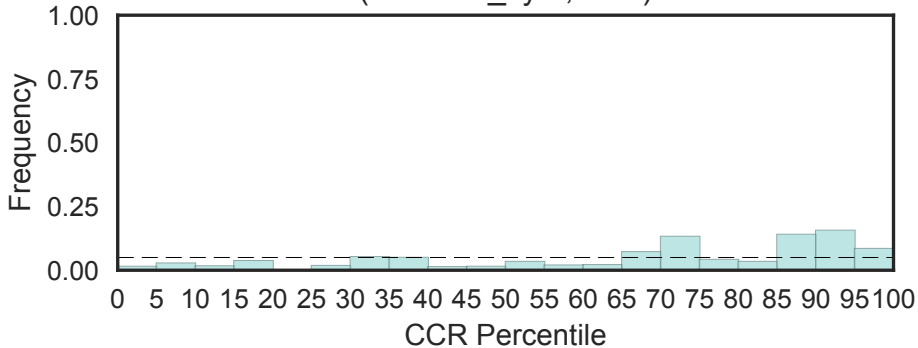



SAMP Motif  
(SAMP, N=5)

Fisher's OR: 0; Bonferroni p-val: 1

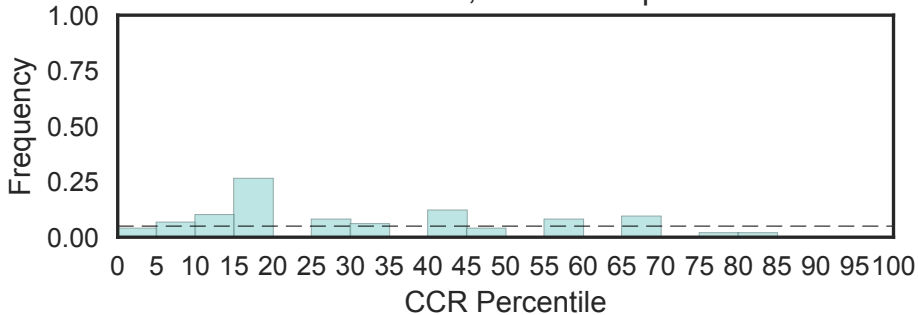

SAM domain (Sterile alpha motif)  
(SAM\_1, N=92)

Fisher's OR: 1.36; Bonferroni p-val: 1

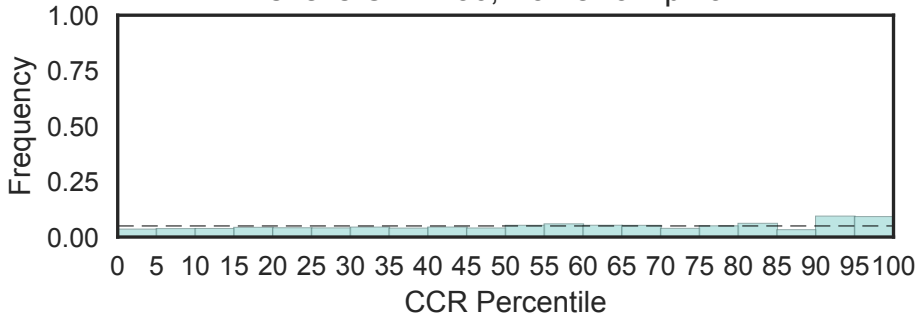

SAM domain (Sterile alpha motif)  
(SAM\_2, N=96)

Fisher's OR: 1.32; Bonferroni p-val: 1

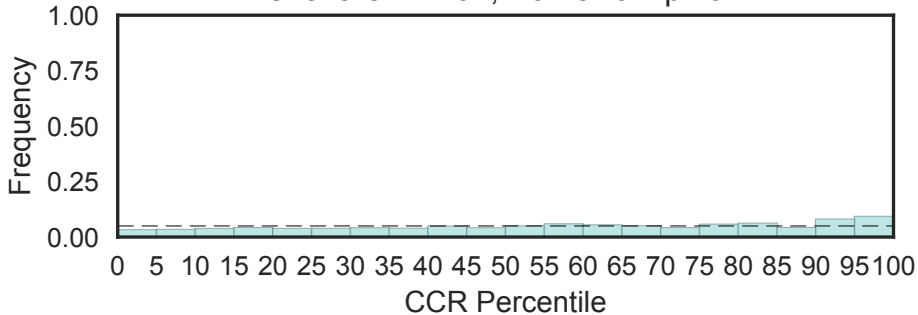

Sterile alpha motif (SAM)/Pointed domain  
(SAM\_PNT, N=16)

Fisher's OR: 1.07; Bonferroni p-val: 1

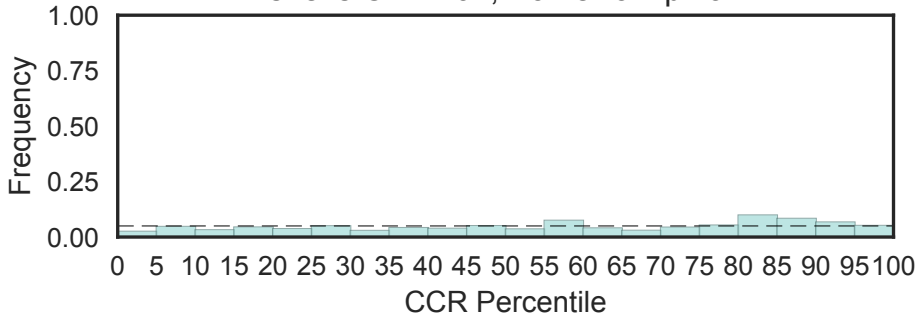

Adenosylmethionine decarboxylase  
(SAM\_decarbox, N=1)

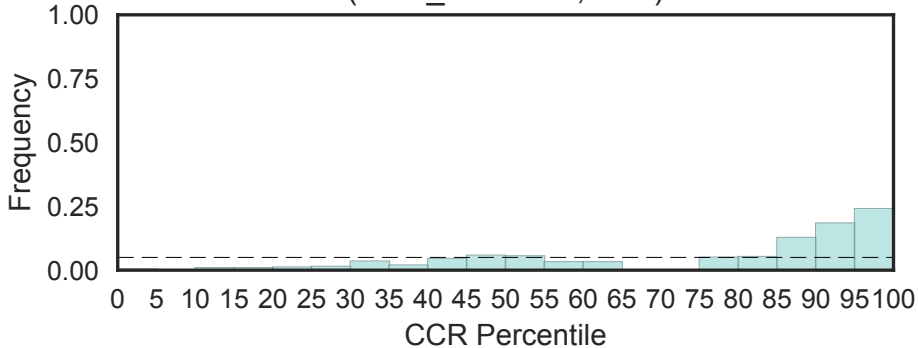

SAND domain  
(SAND, N=8)

Fisher's OR: 3.25; Bonferroni p-val: 1

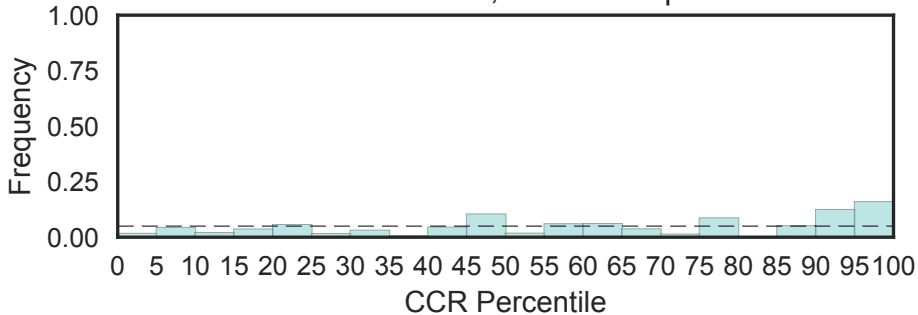

SANTA (SANT Associated)  
(SANTA, N=1)

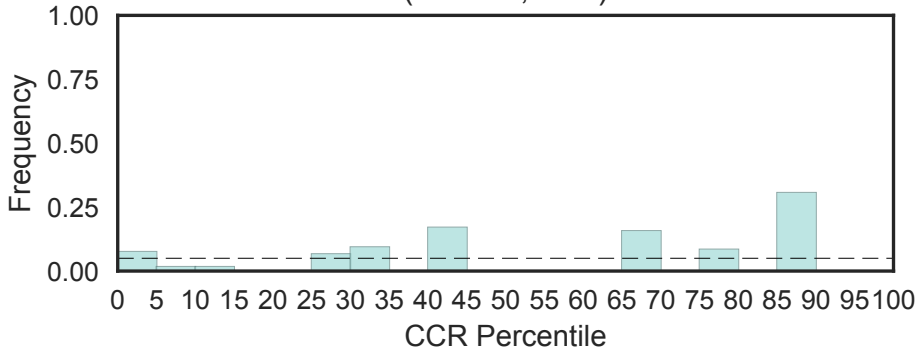

SANT/Myb-like domain of DAMP1  
(SANT\_DAMP1\_like, N=1)

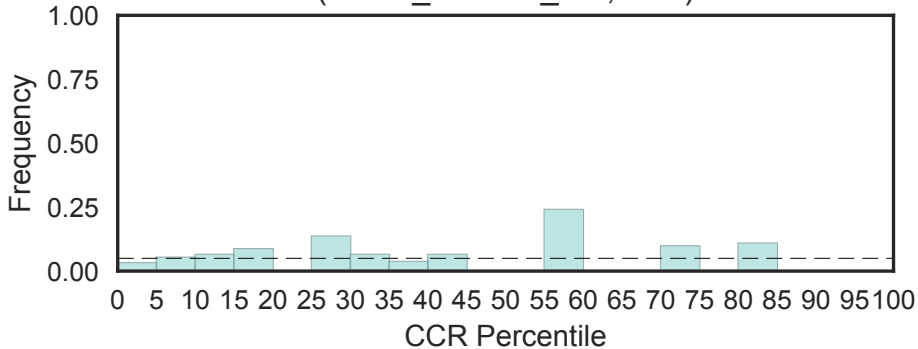



SAP domain  
(SAP, N=21)

Fisher's OR: 2.49; Bonferroni p-val: 1

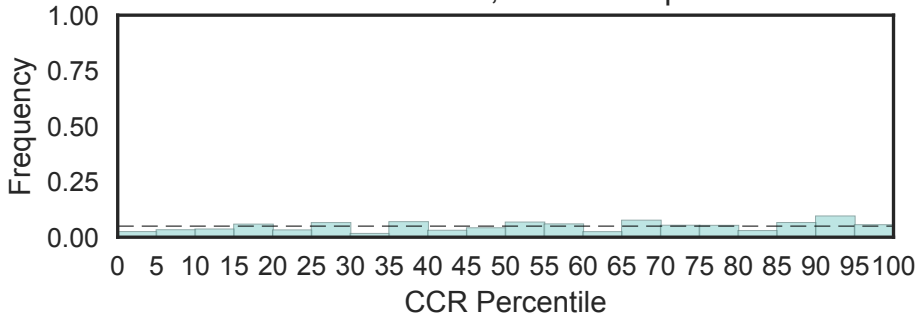

# Histone deacetylase complex subunit SAP130 C-terminus (SAP130\_C, N=1)

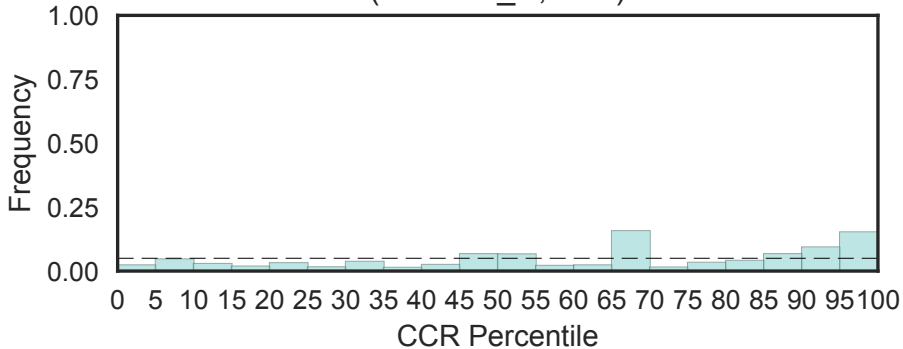

Sin3 associated polypeptide p18 (SAP18)  
(SAP18, N=1)

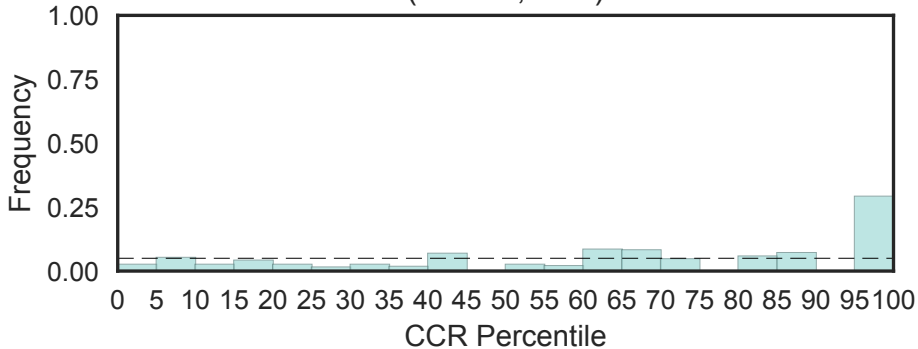

# Sin3 binding region of histone deacetylase complex subunit SAP30 (SAP30\_Sin3\_bdg, N=2)

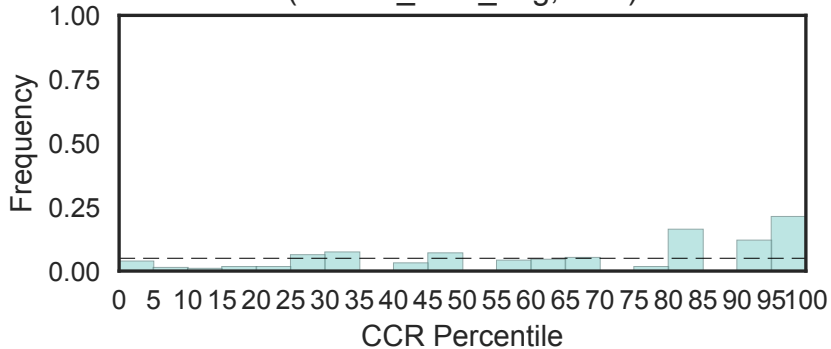

SIT4 phosphatase-associated protein  
(SAPS, N=4)

Fisher's OR: 0.572; Bonferroni p-val: 1

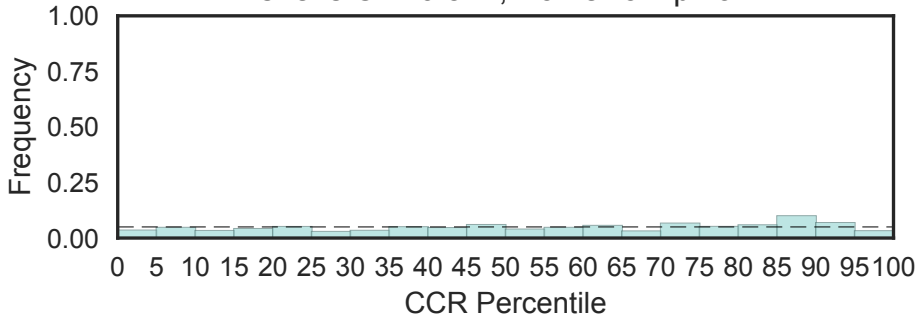

# Smad anchor for receptor activation (SARA) (SARA, N=1)

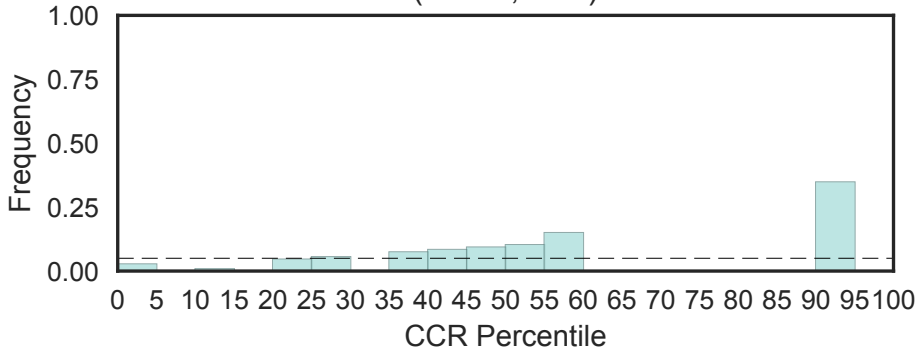

# SOCE-associated regulatory factor of calcium homoeostasis (SARAF, N=1)

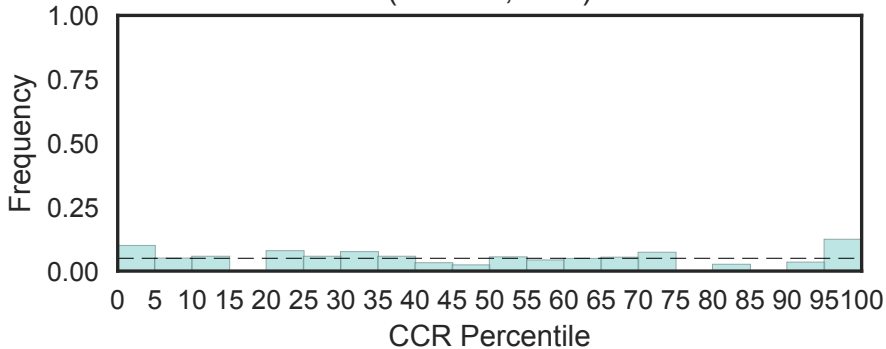

# Specifically androgen-regulated gene protein (SARG, N=2)

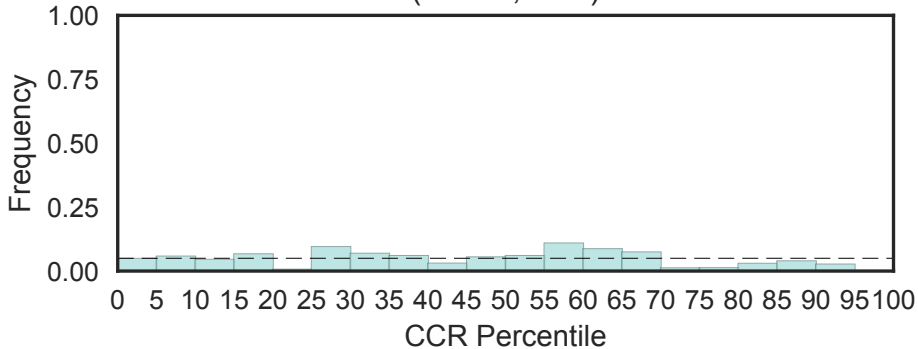



SART-1 family  
(SART-1, N=1)

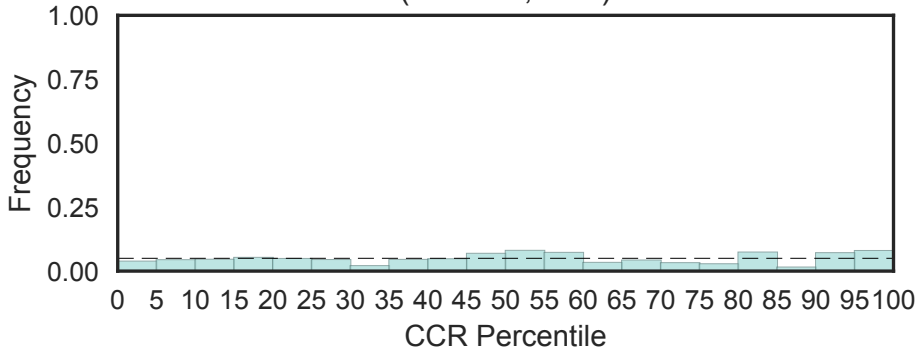

Centriolar protein SAS N-terminal  
(SAS-6\_N, N=1)

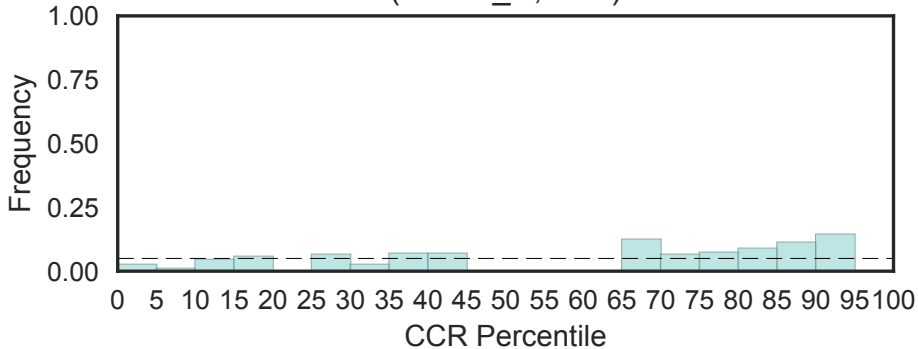

# Carbohydrate esterase, sialic acid-specific acetylsterase (SASA, N=1)

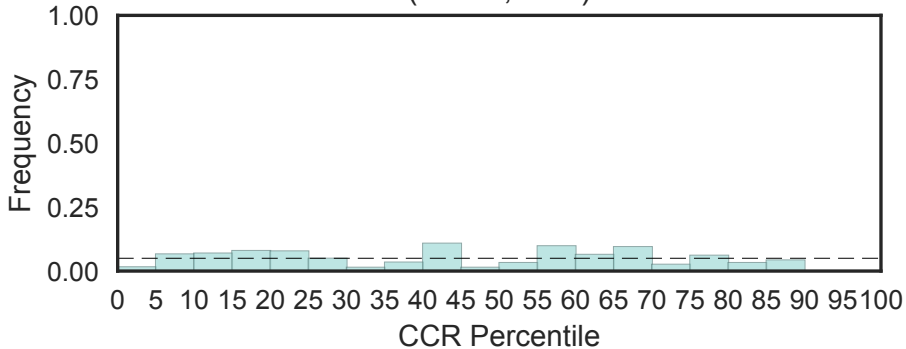

# Spermatogenesis-associated serine-rich protein 1 (SASRP1, N=1)

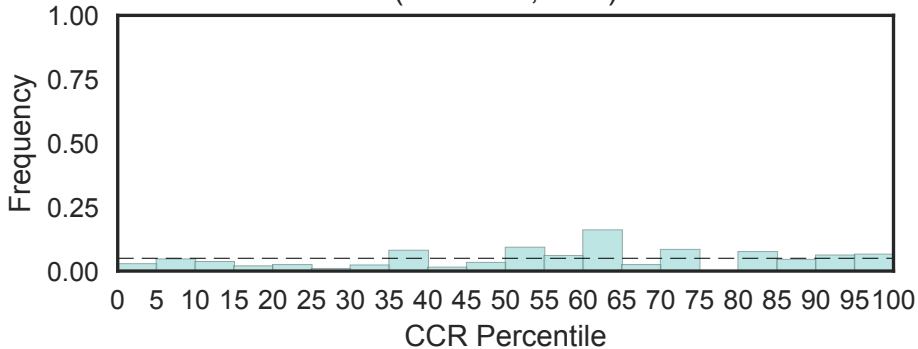

Uncharacterized conserved domain (SAYSvFN)  
(SAYSvFN, N=1)

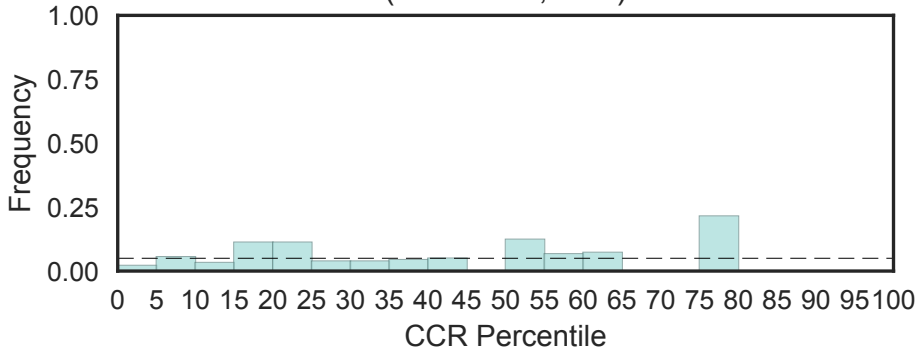

Sodium Bile acid symporter family  
(SBF, N=6)

Fisher's OR: 0; Bonferroni p-val: 1

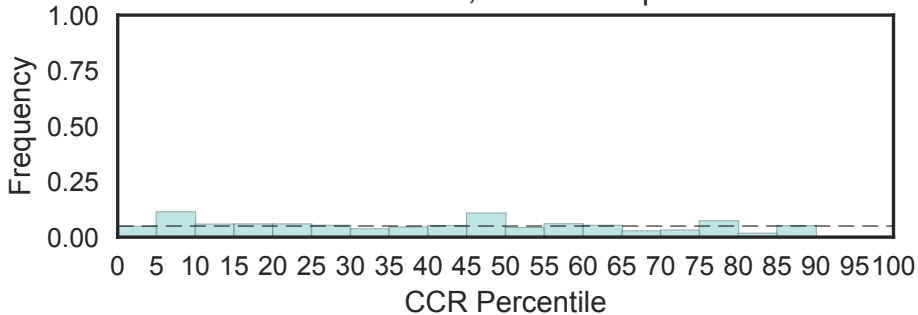

Myotubularin protein  
(SBF2, N=2)

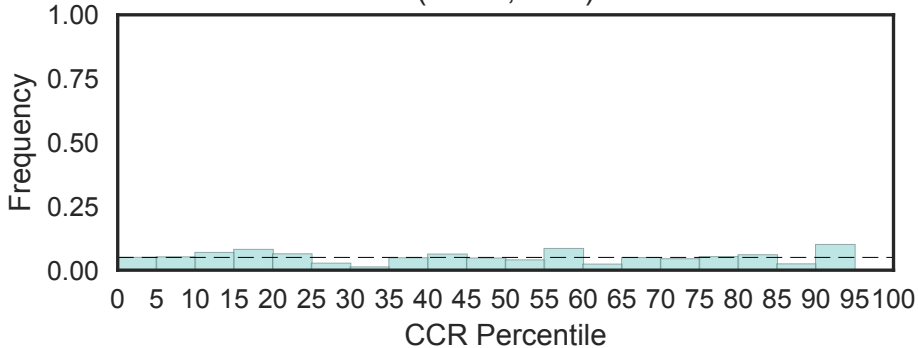

SBF-like CPA transporter family (DUF4137)  
(SBF\_like, N=2)

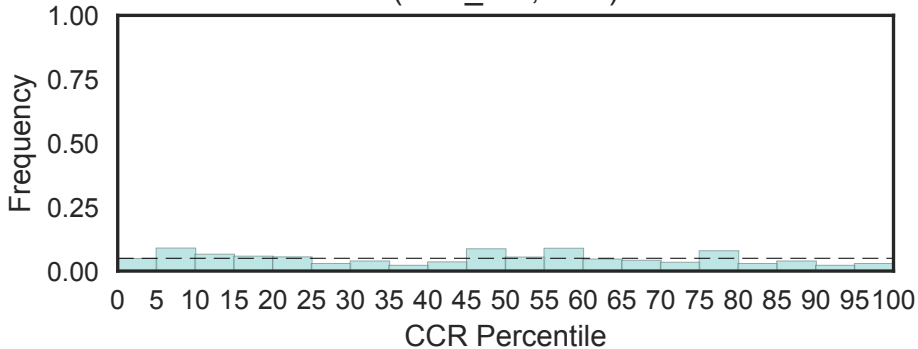



56kDa selenium binding protein (SBP56)  
(SBP56, N=1)

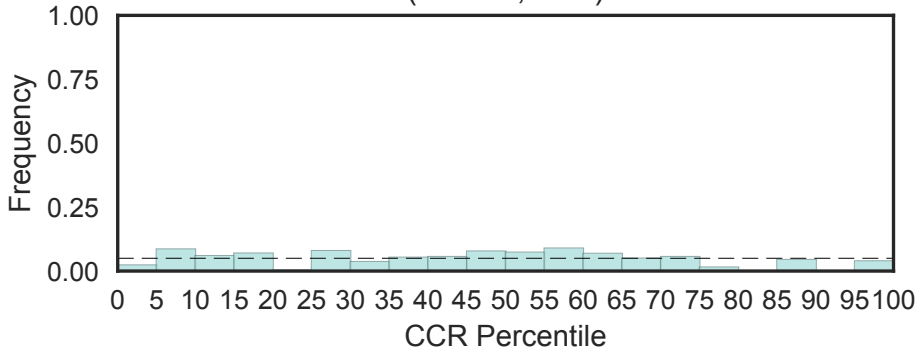

Bacterial extracellular solute-binding proteins, family 3  
(SBP\_bac\_3, N=18)

Fisher's OR: 4.33; Bonferroni p-val: 5.15e-15

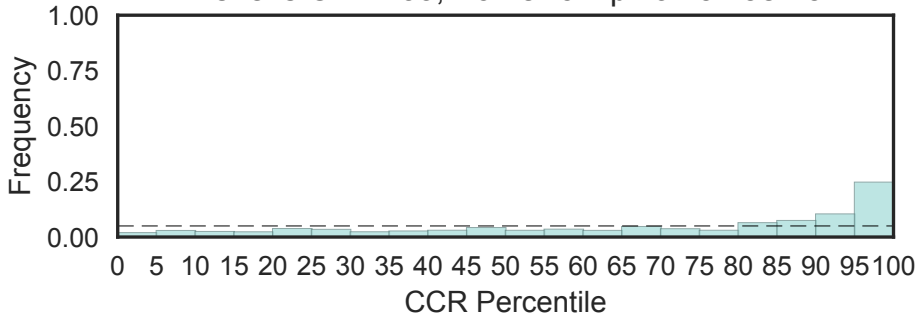

SCA7, zinc-binding domain  
(SCA7, N=4)

Fisher's OR: 1.9; Bonferroni p-val: 1

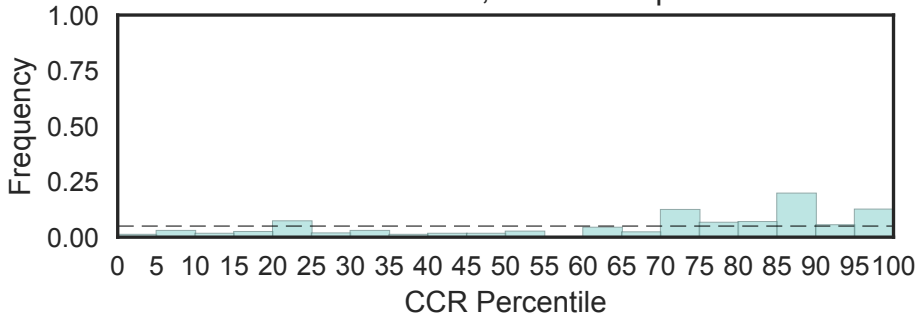

Protein SCAI  
(SCAI, N=1)

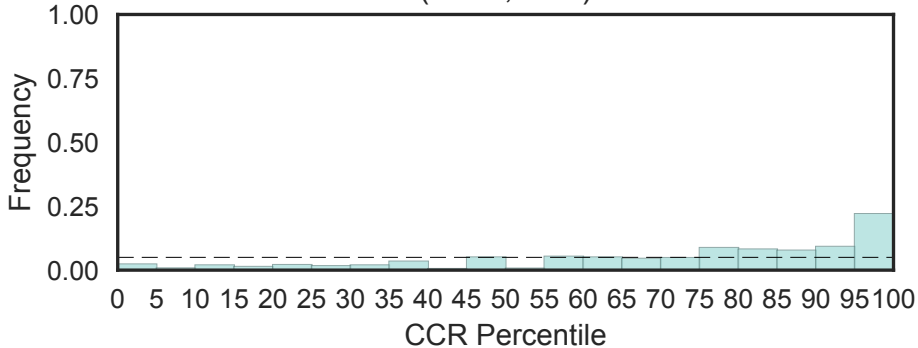

SCAMP family  
(SCAMP, N=5)

Fisher's OR: 2.31; Bonferroni p-val: 1

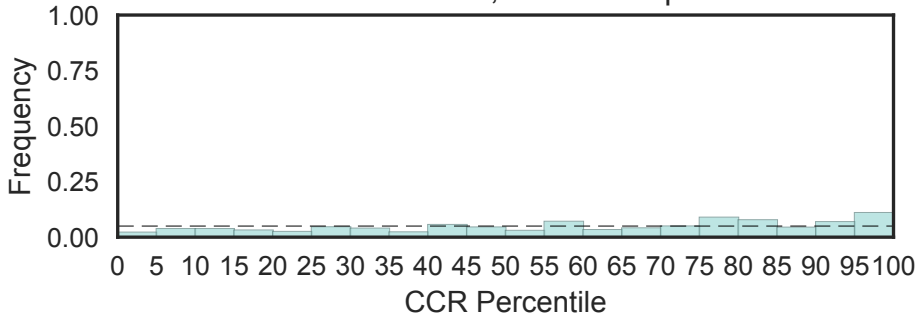

SCAN domain  
(SCAN, N=54)

Fisher's OR: 0.824; Bonferroni p-val: 1

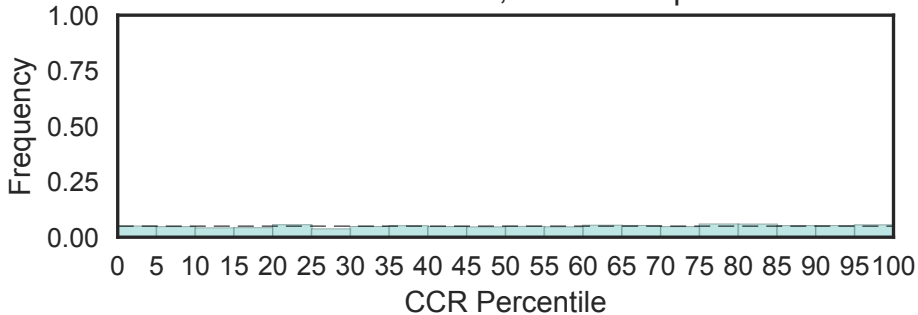

# S phase cyclin A-associated protein in the endoplasmic reticulum (SCAPER\_N, N=1)

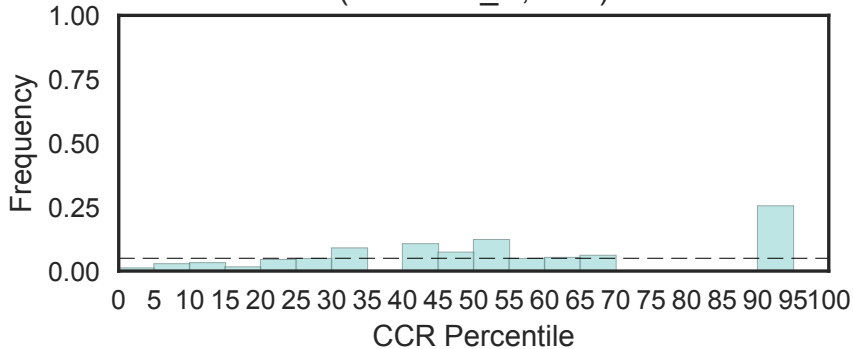

# Stem cell factor (SCF, N=1)

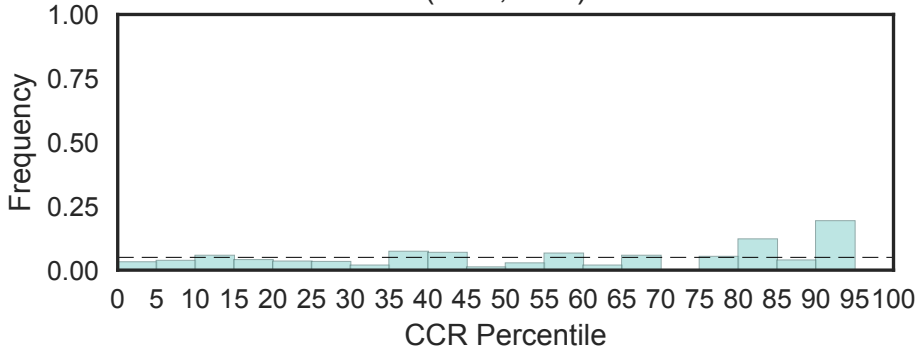



# Schwannomin-interacting protein 1 (SCHIP-1, N=2)

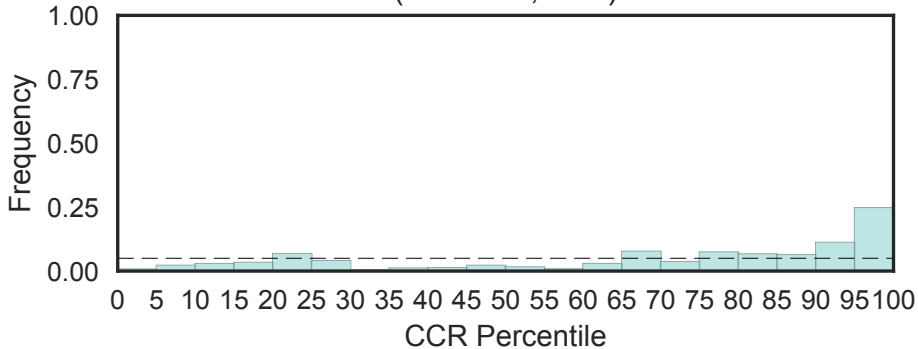

SCIMP protein  
(SCIMP, N=1)

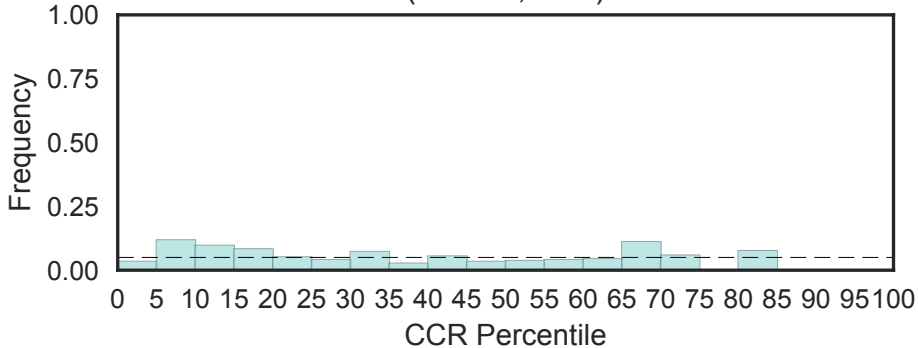

Acidic C-terminal region of sodium channel modifier 1 SCN1A  
(SCNM1\_acidic, N=1)

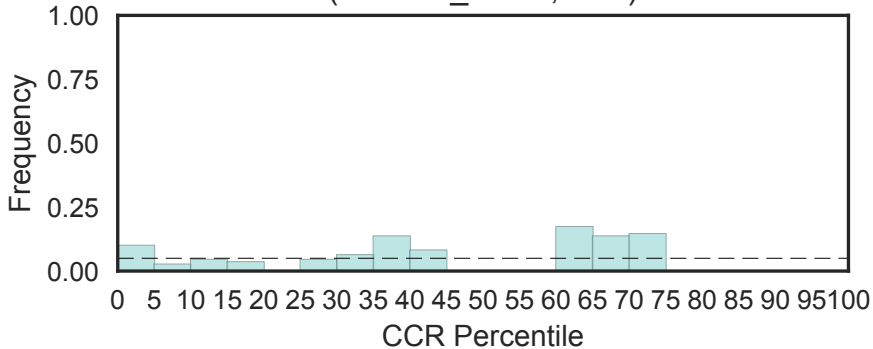

SCO1/SenC  
(SCO1-SenC, N=2)

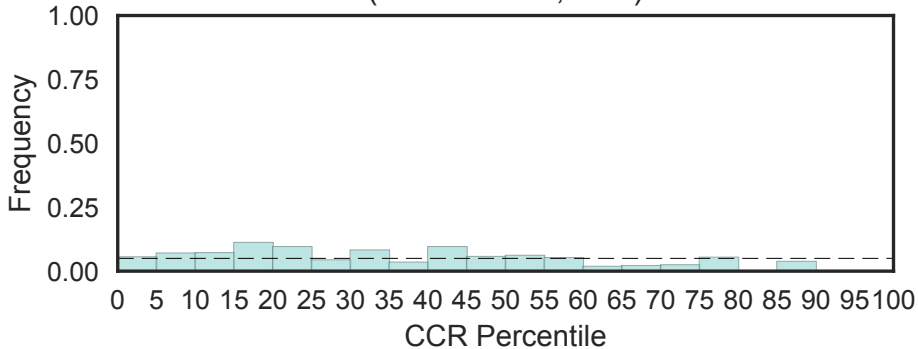

# Synaptonemal complex protein 1 (SCP-1) (SCP-1, N=1)

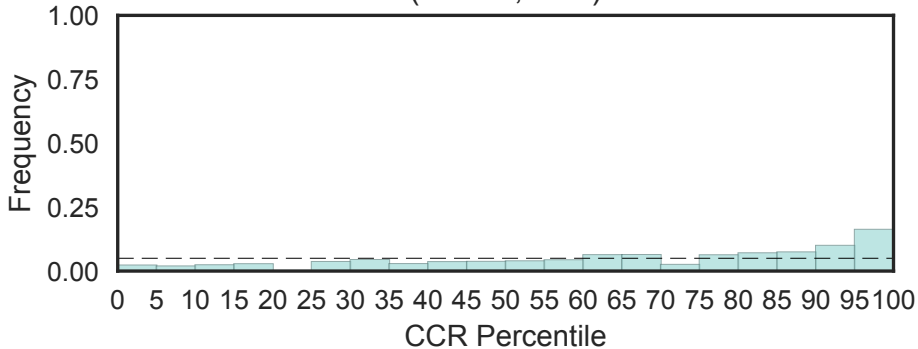

SCP-2 sterol transfer family  
(SCP2, N=5)

Fisher's OR: 0; Bonferroni p-val: 1

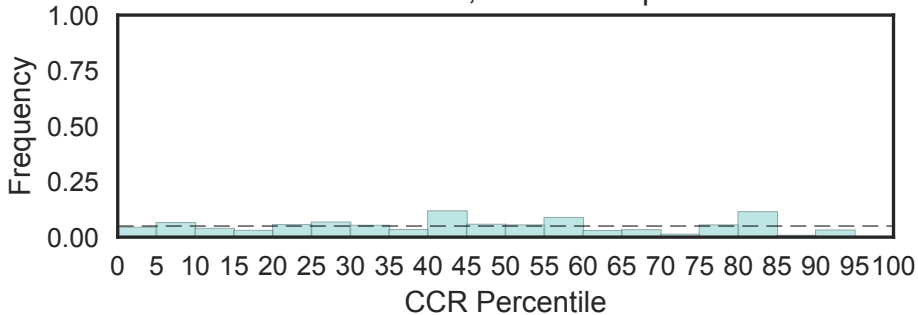

# Scrapie-responsive protein 1 (SCRG1, N=1)

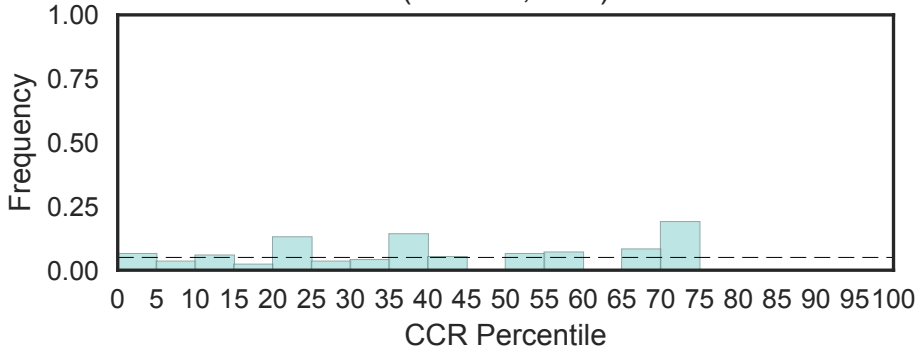

SDA1  
(SDA1, N=2)

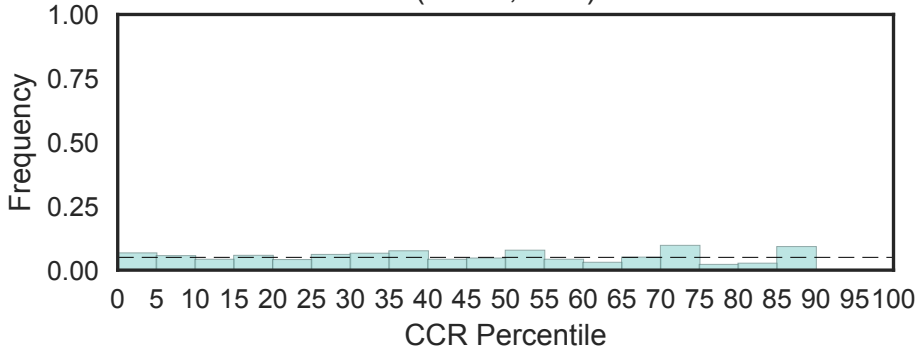



Sodium:dicarboxylate symporter family  
(SDF, N=8)

Fisher's OR: 1.16; Bonferroni p-val: 1

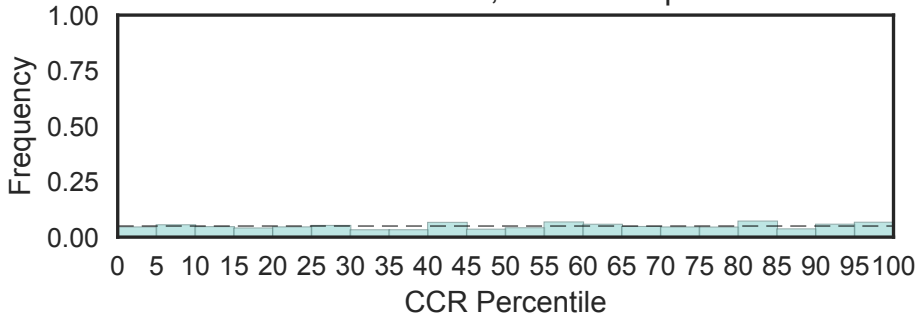

# Squalene epoxidase (SE, N=1)

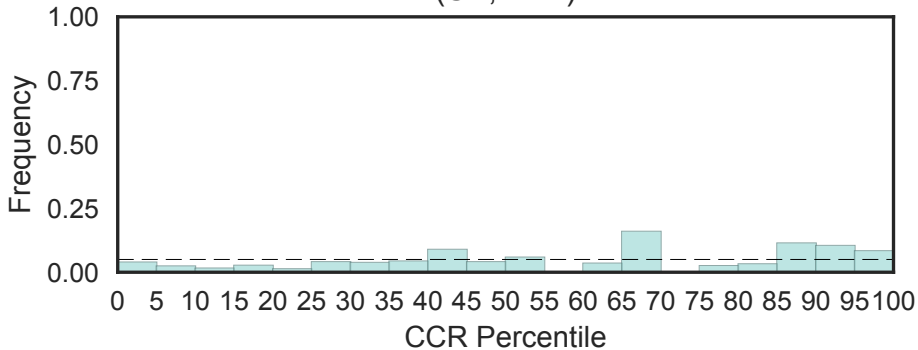

SEA domain  
(SEA, N=40)

Fisher's OR: 0; Bonferroni p-val: 0.00594

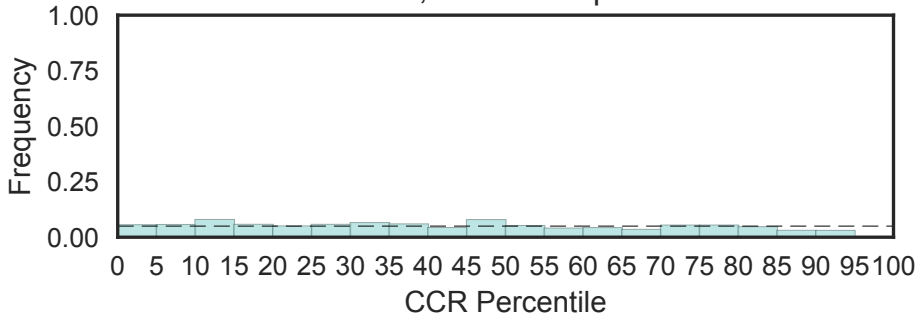

Serine-rich region of AP3B1, clathrin-adaptor complex  
(SEEEED, N=1)

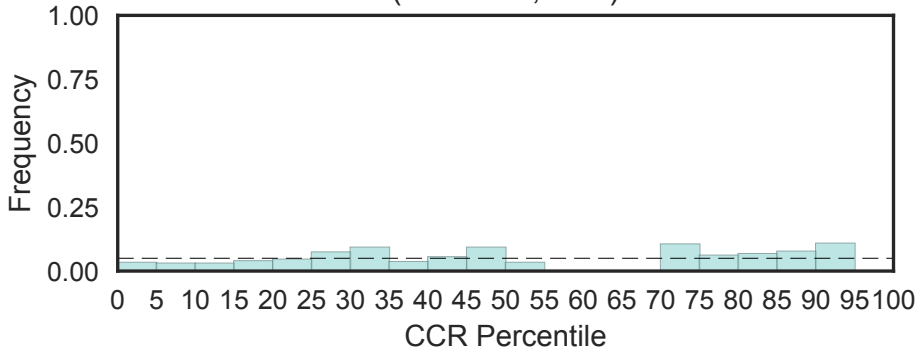

SEFIR domain  
(SEFIR, N=7)

Fisher's OR: 0.368; Bonferroni p-val: 1

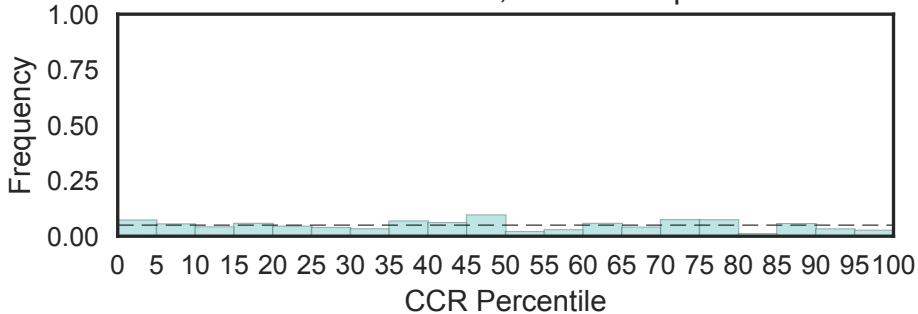

SEP domain  
(SEP, N=4)

Fisher's OR: 0; Bonferroni p-val: 1

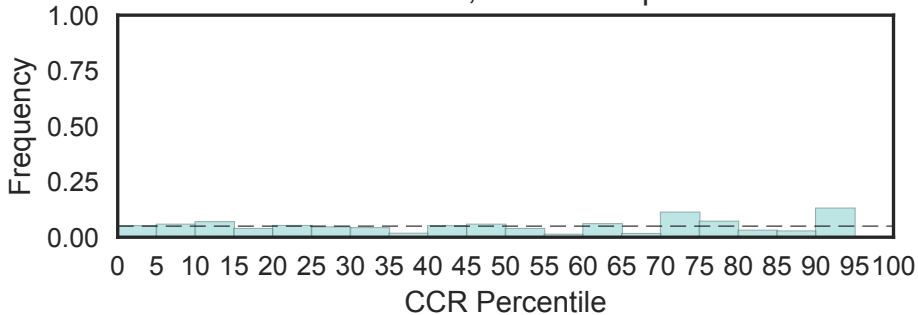

SERTA motif  
(SERTA, N=5)

Fisher's OR: 3; Bonferroni p-val: 1

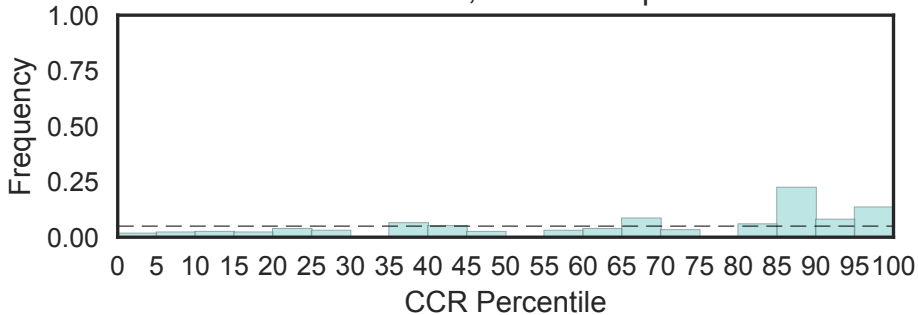

SET domain  
(SET, N=42)

Fisher's OR: 4.23; Bonferroni p-val: 9.07e-16

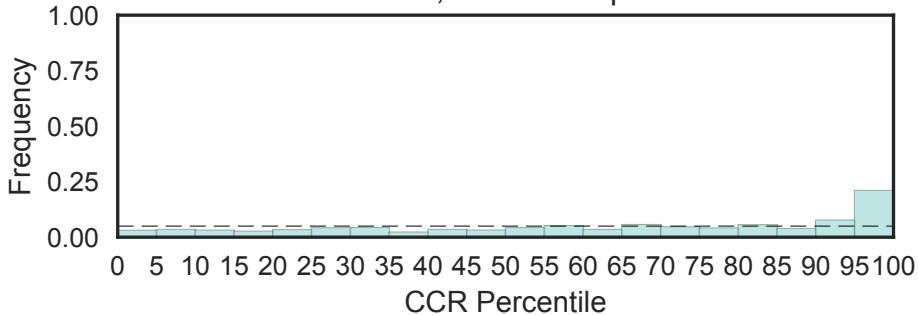



Splicing factor 1 helix-hairpin domain  
(SF1-HH, N=1)

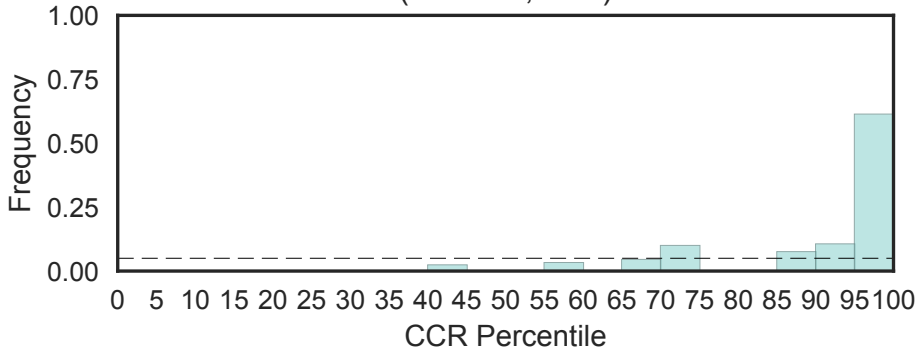

Pre-mRNA-splicing factor SF3a complex subunit 2 (Prp11)  
(SF3A2, N=1)

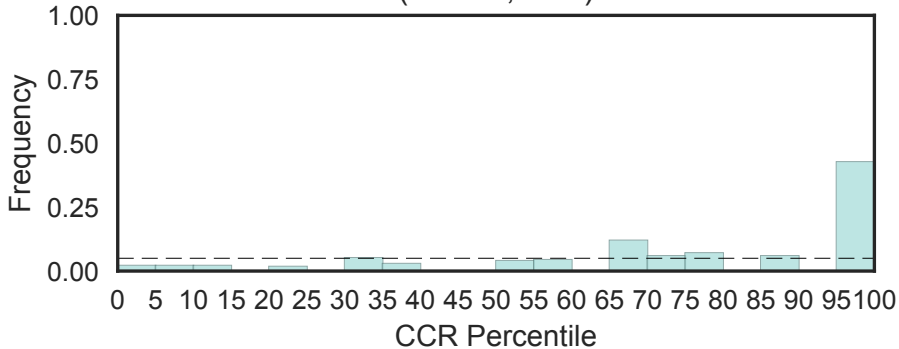

Pre-mRNA-splicing factor SF3A3, of SF3a complex, Prp9  
(SF3A3, N=1)

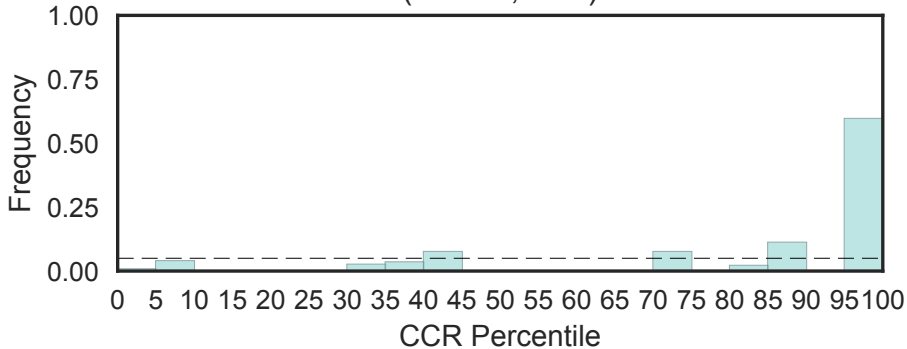

Splicing factor SF3a60 binding domain  
(SF3a60\_bindingd, N=1)

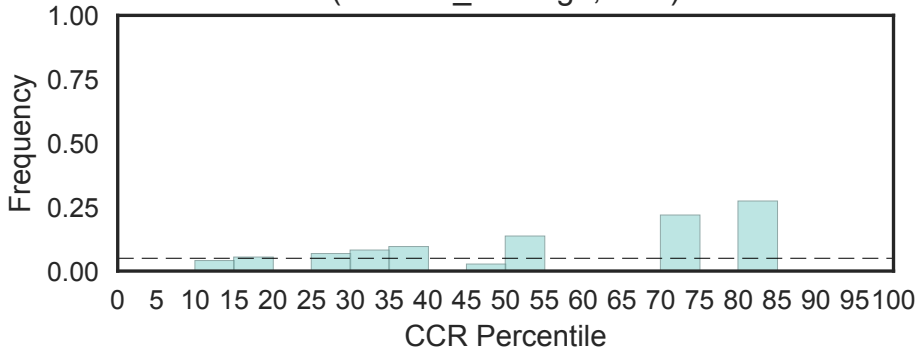

# Splicing factor 3B subunit 1 (SF3b1, N=1)

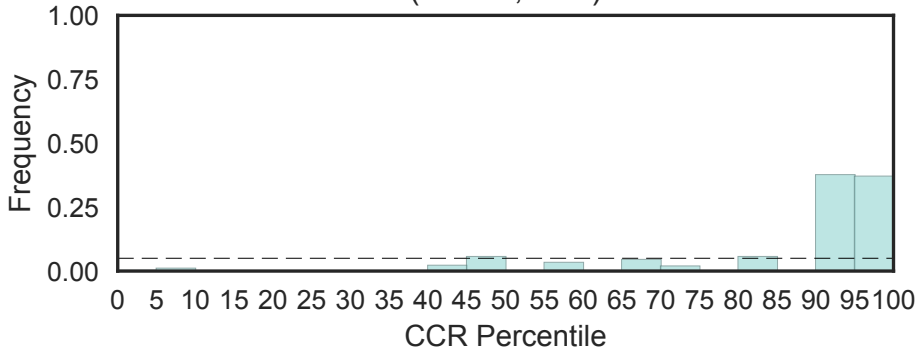

Splicing factor 3B subunit 10 (SF3b10)  
(SF3b10, N=1)

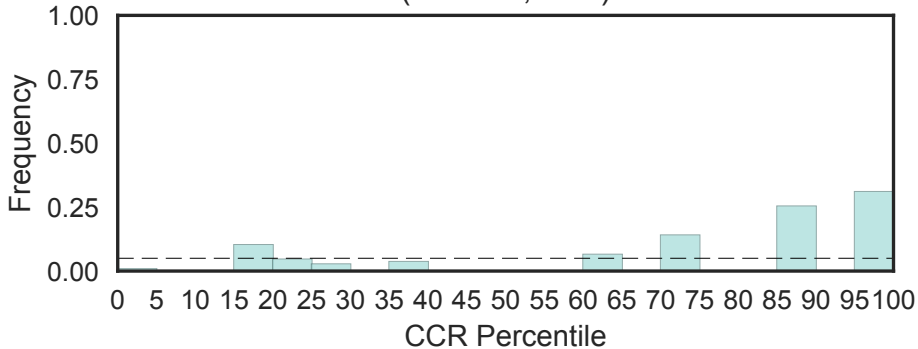

# Secretogranin-3 (SGIII, N=1)

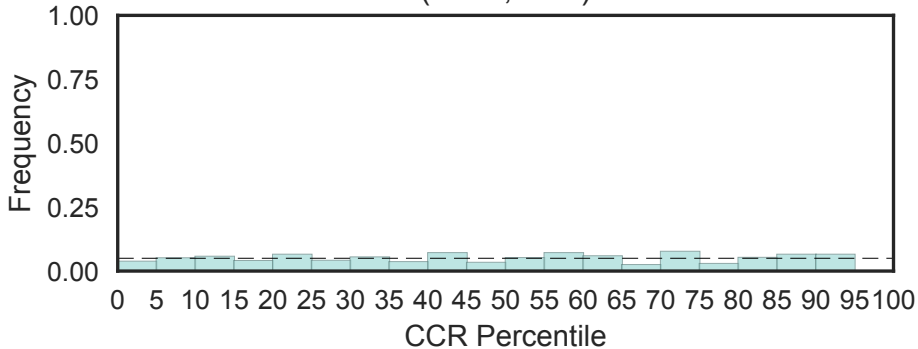

SMP-30/Gluconolactonase/LRE-like region  
(SGL, N=5)

Fisher's OR: 0.354; Bonferroni p-val: 1

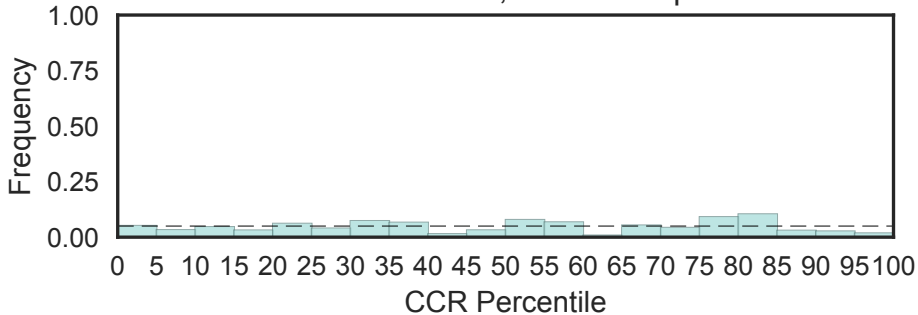



SGS domain  
(SGS, N=2)

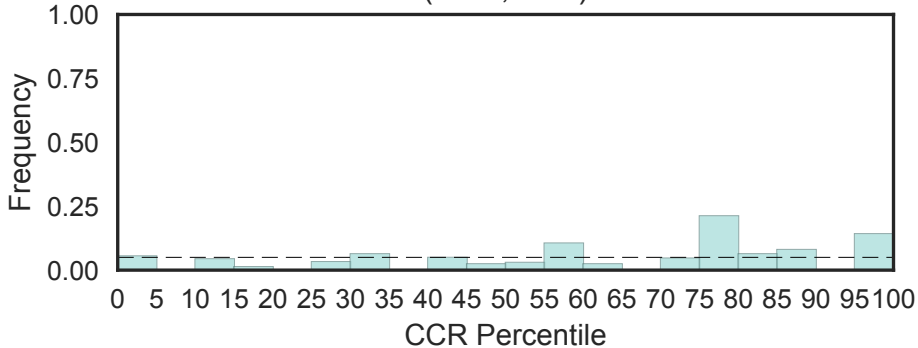

SGT1 protein  
(SGT1, N=1)

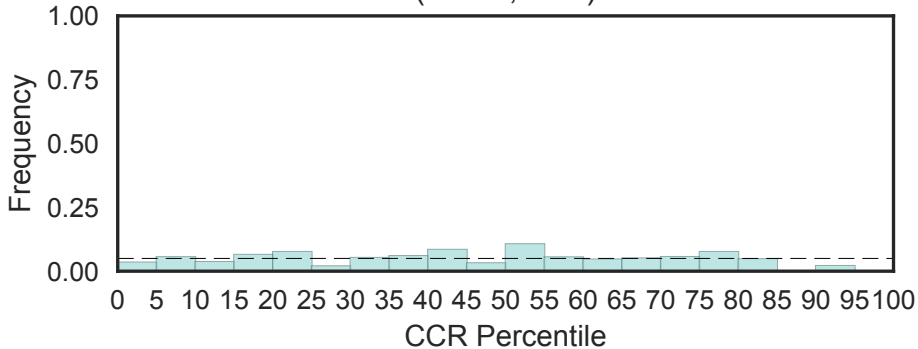

# Homodimerisation domain of SGTA (SGTA\_dimer, N=2)

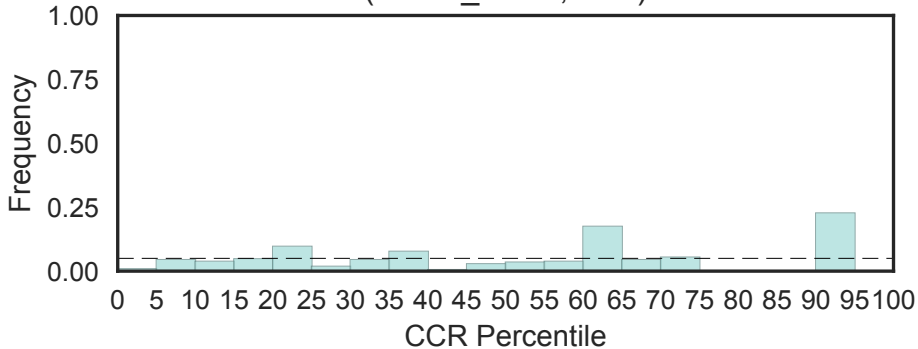

SH2 domain  
(SH2, N=110)

Fisher's OR: 2.15; Bonferroni p-val: 0.00821

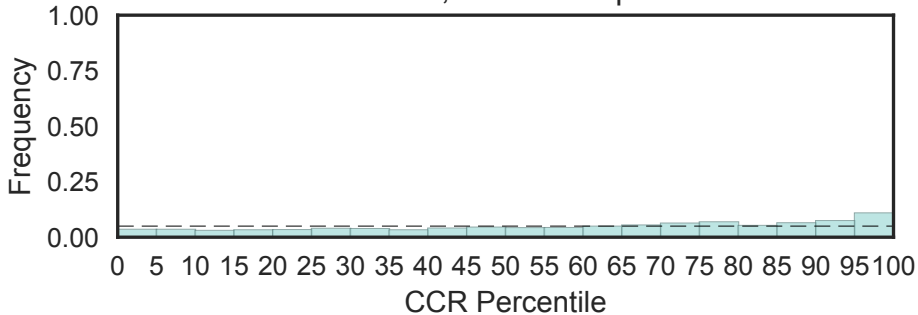

SH2 domain  
(SH2\_2, N=1)

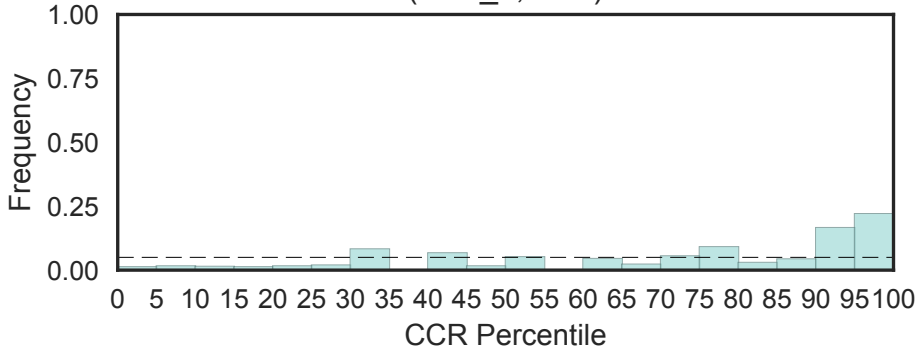

SH3-RhoGEF linking unstructured region  
(SH3-RhoG\_link, N=2)

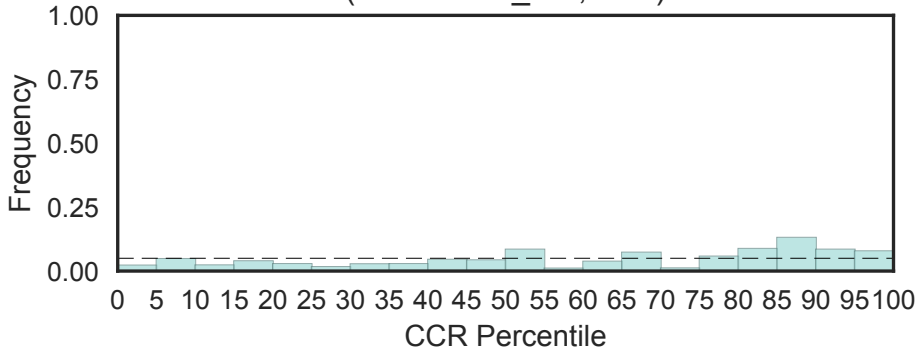

Linker region between SH3 and WW domains on ARHGAP12  
(SH3-WW\_linker, N=1)

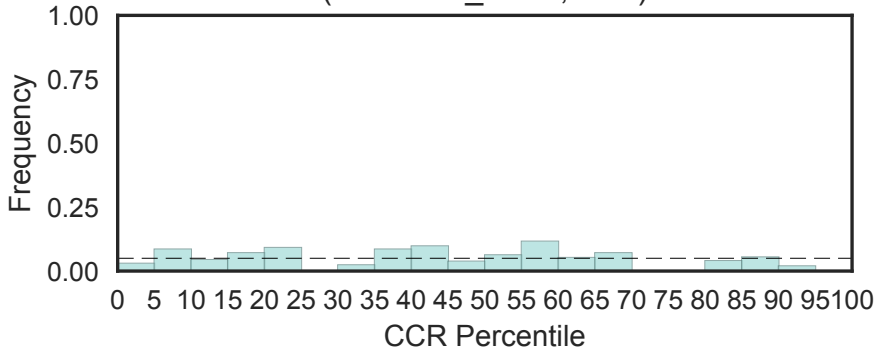

SH3-binding, glutamic acid-rich protein  
(SH3BGR, N=3)

Fisher's OR: 0; Bonferroni p-val: 1

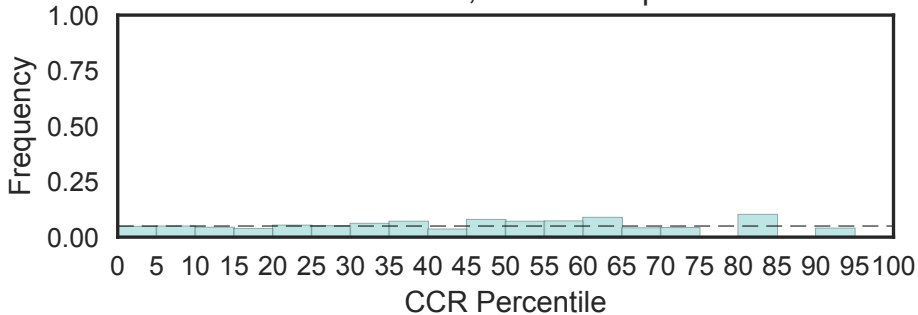



SH3 domain-binding protein 5 (SH3BP5)  
(SH3BP5, N=2)

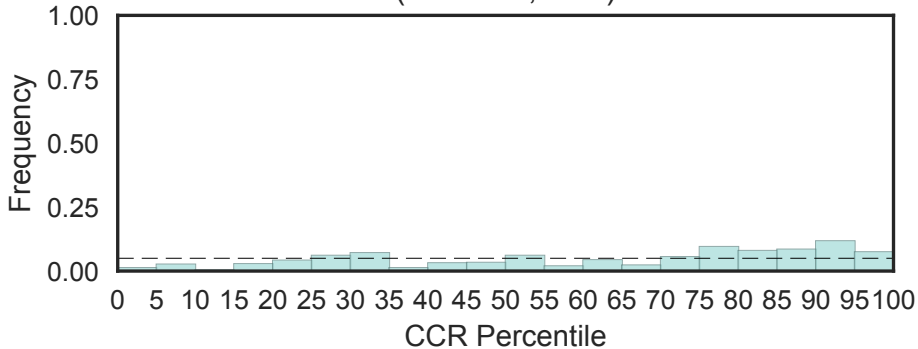

SH3 domain  
(SH3\_1, N=216)

Fisher's OR: 0.959; Bonferroni p-val: 1

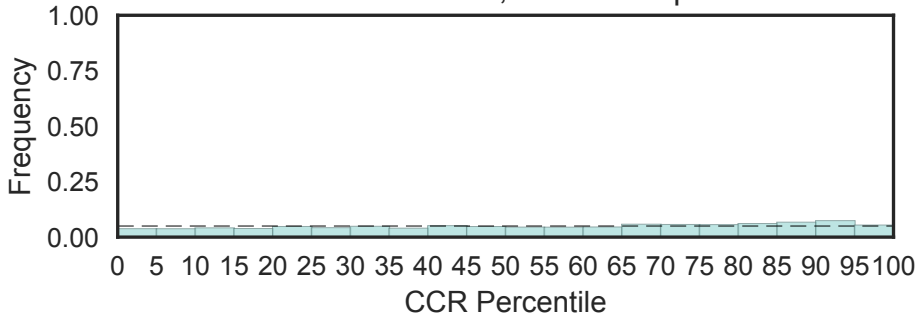

Variant SH3 domain  
(SH3\_2, N=226)

Fisher's OR: 0.881; Bonferroni p-val: 1

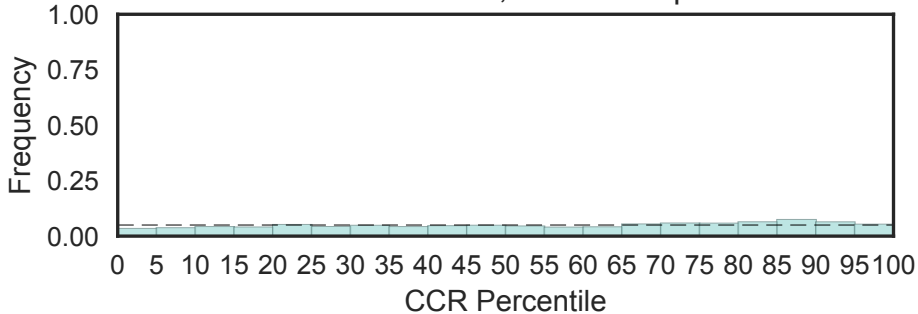

Bacterial SH3 domain  
(SH3\_3, N=1)

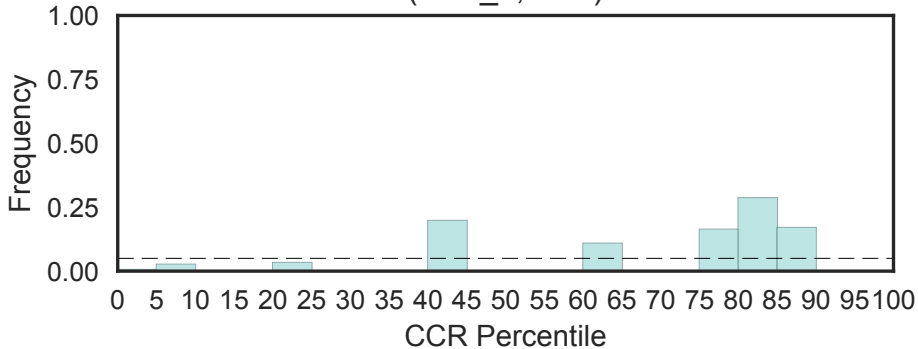

Variant SH3 domain  
(SH3\_9, N=197)

Fisher's OR: 0.807; Bonferroni p-val: 1

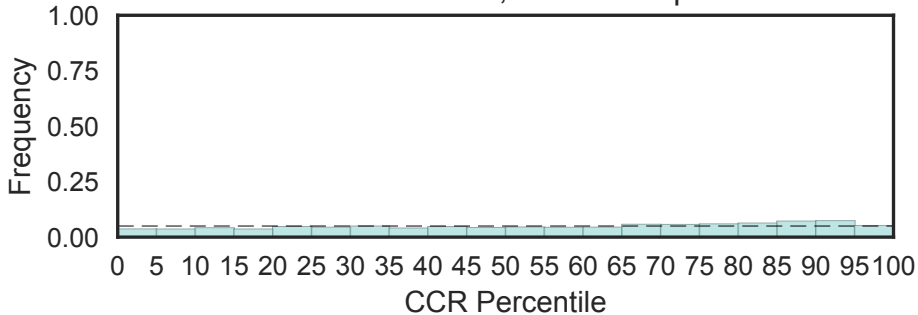

Sperm-tail PG-rich repeat  
(SHIPPO-rpt, N=22)

Fisher's OR: 0.411; Bonferroni p-val: 1

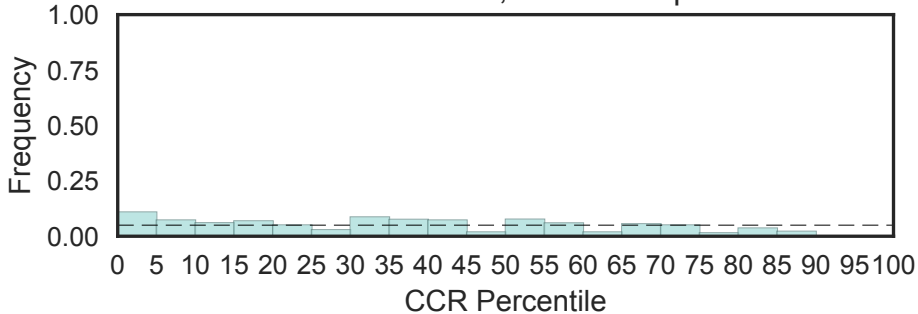

Serine hydroxymethyltransferase  
(SHMT, N=3)

Fisher's OR: 0; Bonferroni p-val: 1

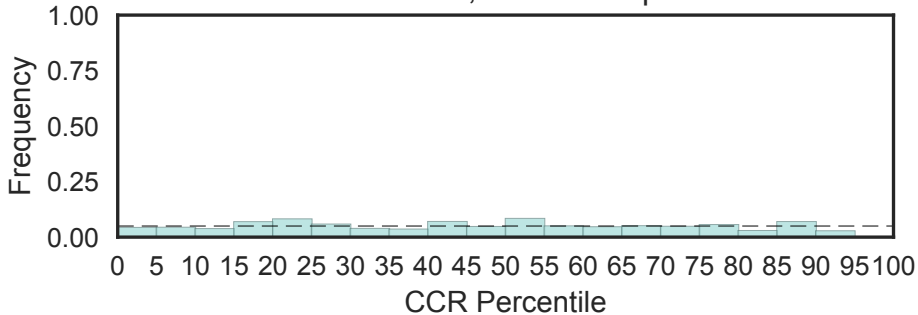

# SHNi-TPR (SHNi-TPR, N=1)

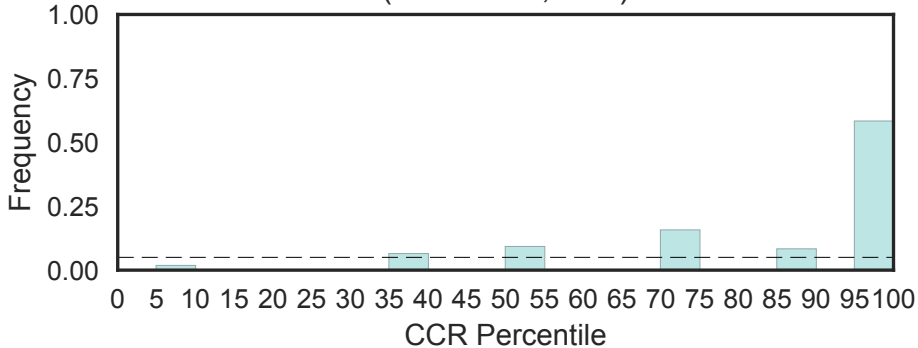



SHQ1 protein  
(SHQ1, N=1)

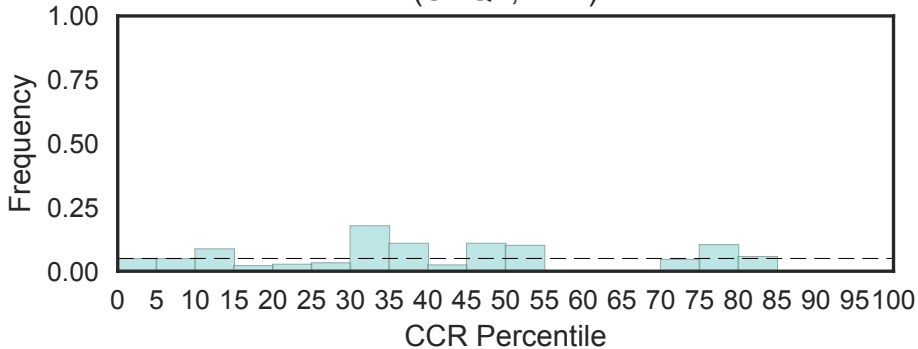

SHR-binding domain of vacuolar-sorting associated protein 13  
(SHR-BD, N=4)

Fisher's OR: 0; Bonferroni p-val: 1

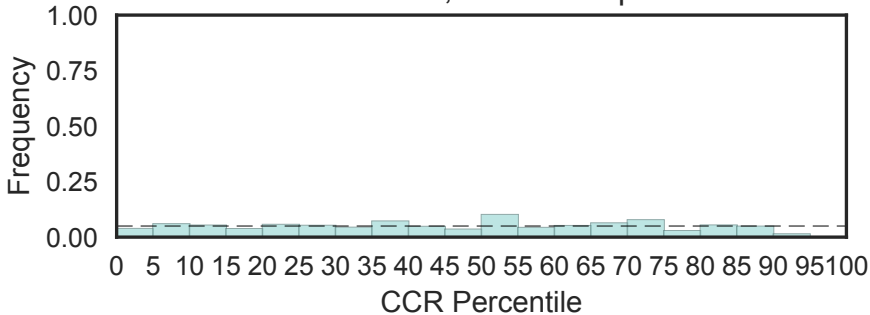

SHS2 domain found in N terminus of Rpb7p/Rpc25p/MJ0397  
(SHS2\_Rpb7-N, N=3)

Fisher's OR: 1.26; Bonferroni p-val: 1

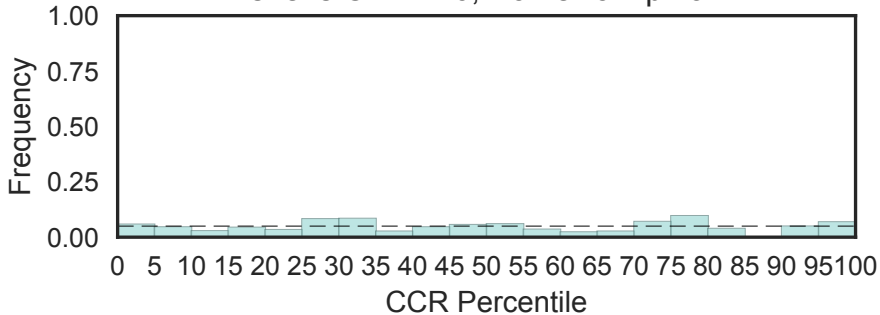

dsRNA-gated channel SID-1  
(SID-1\_RNA\_chan, N=2)

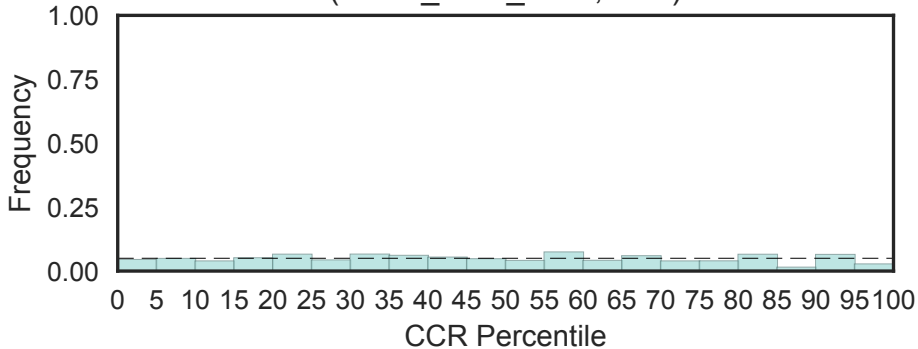

SIKE family  
(SIKE, N=2)

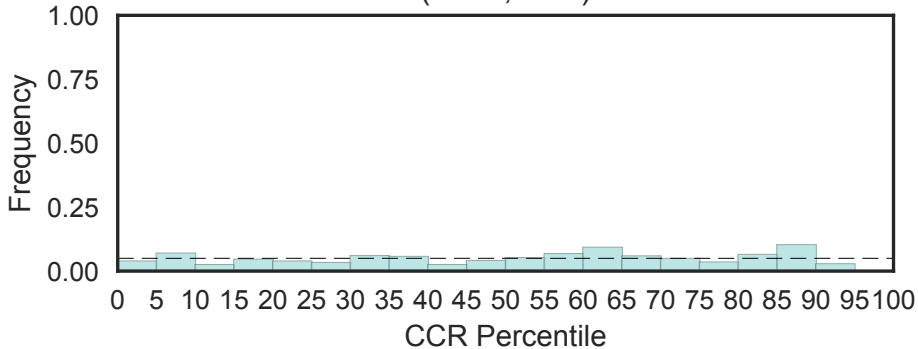

Protein of unknown function (DUF541)  
(SIMPL, N=1)

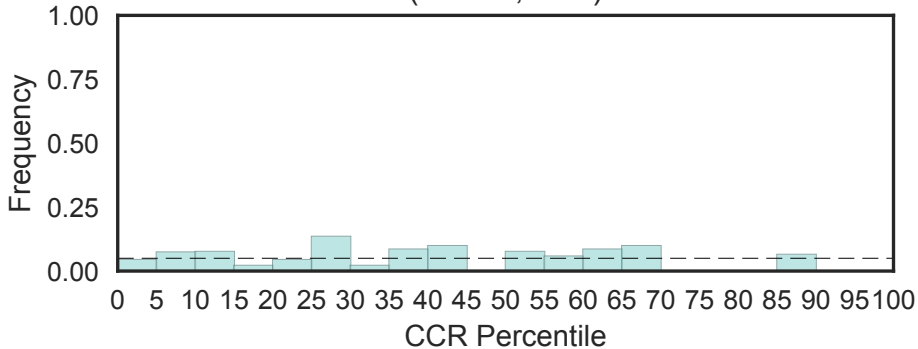

Single-minded protein C-terminus  
(SIM\_C, N=2)

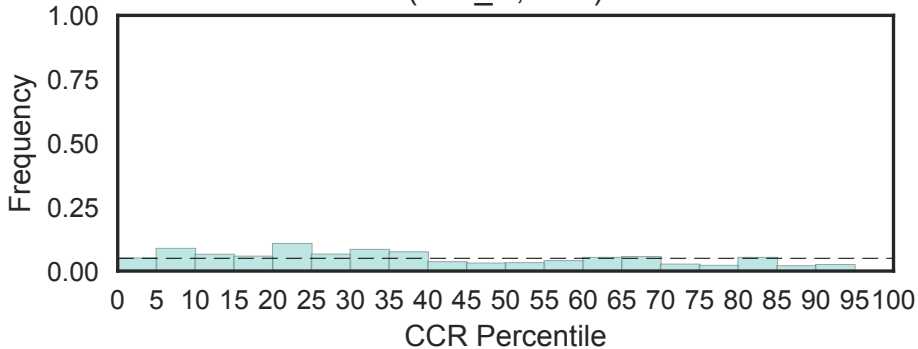

# Stress-activated map kinase interacting protein 1 (SIN1) (SIN1, N=1)

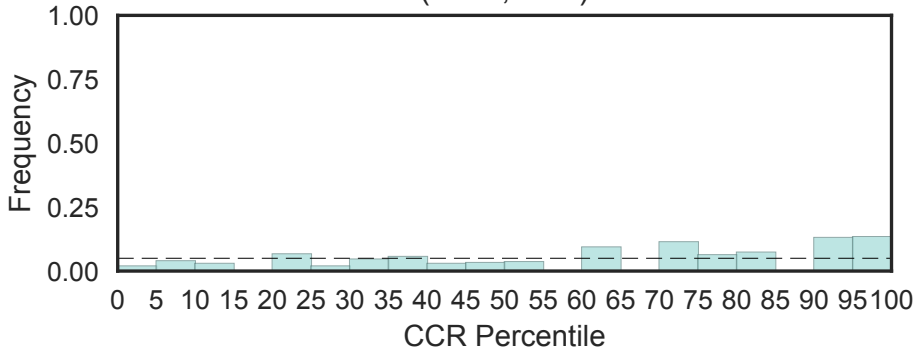



# SAPK-interacting protein 1 (Sin1), Pleckstrin-homology (SIN1\_PH, N=1)

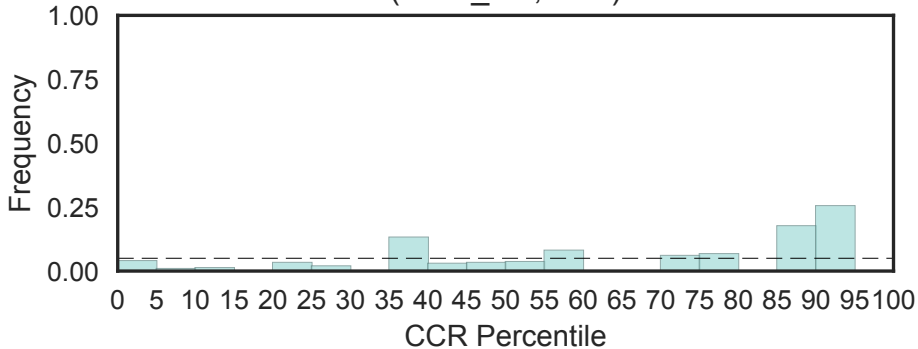

# Survival motor neuron (SMN) interacting protein 1 (SIP1) (SIP1, N=1)

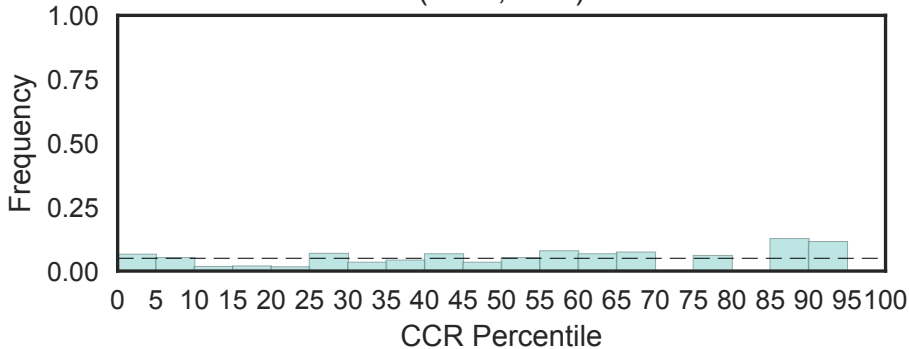

Sir2 family  
(SIR2, N=8)

Fisher's OR: 1.05; Bonferroni p-val: 1

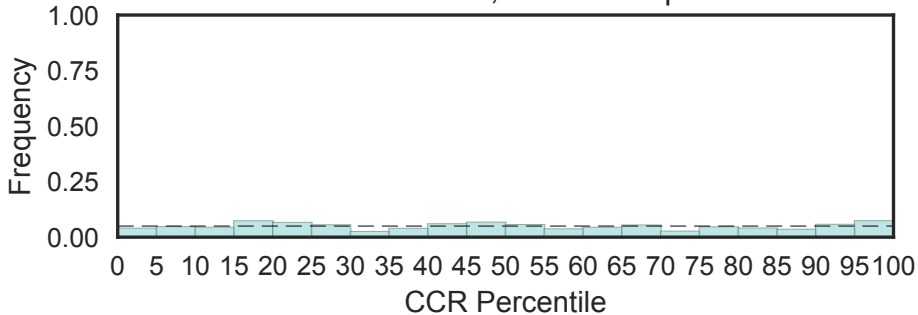

SIR2-like domain  
(SIR2\_2, N=2)

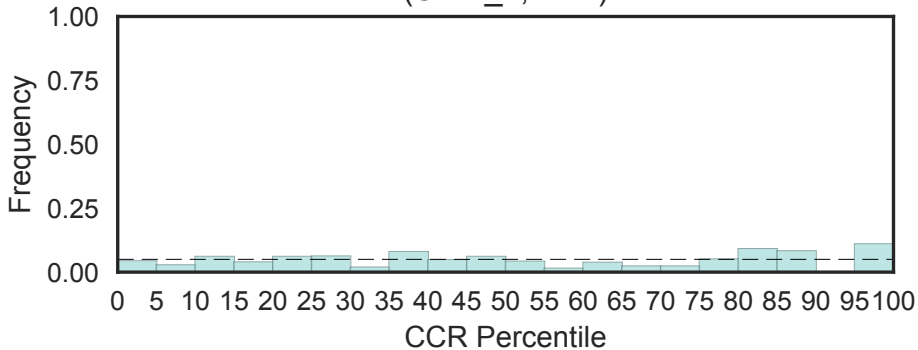

SIS domain  
(SIS, N=4)

Fisher's OR: 4.29; Bonferroni p-val: 1

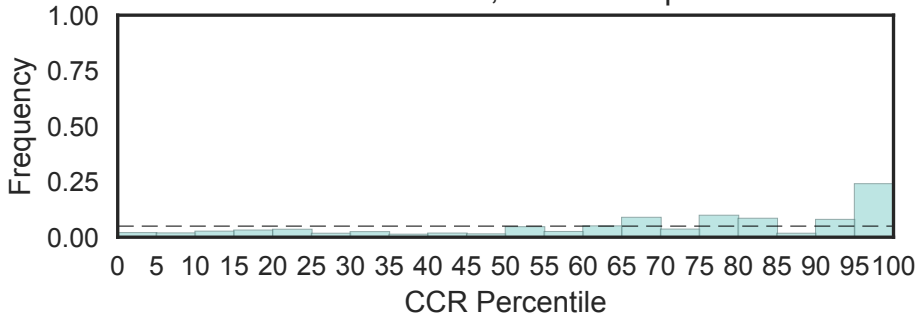

SHP2-interacting transmembrane adaptor protein, SIT  
(SIT, N=3)

Fisher's OR: 0; Bonferroni p-val: 1

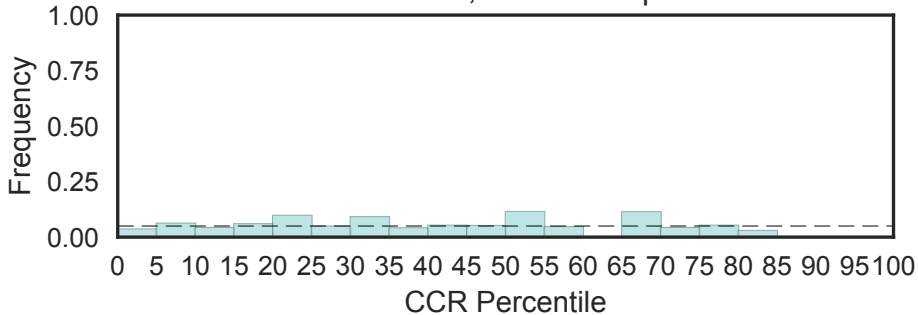

Transcriptional regulator, SIX1, N-terminal SD domain  
(SIX1\_SD, N=7)

Fisher's OR: 2.97; Bonferroni p-val: 1

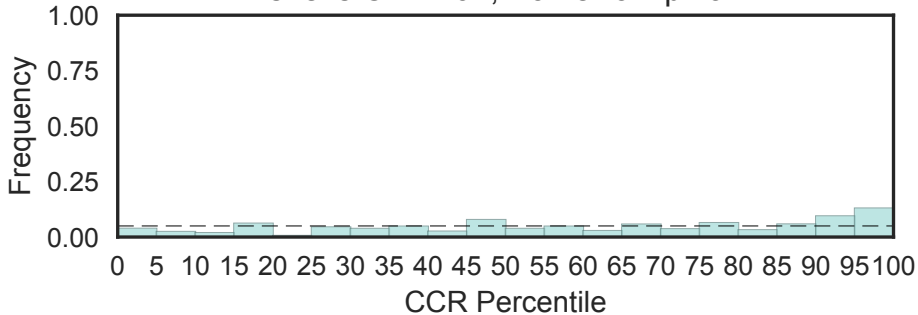

# Spindle and kinetochore-associated protein 1 (SKA1, N=1)

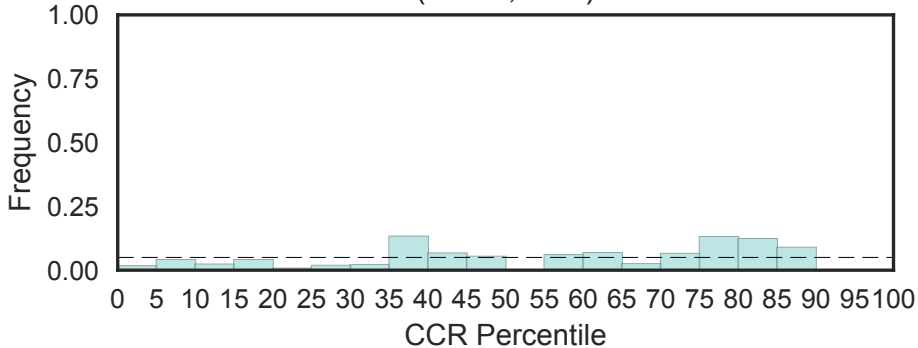



# Spindle and kinetochore-associated protein 2 (SKA2, N=1)

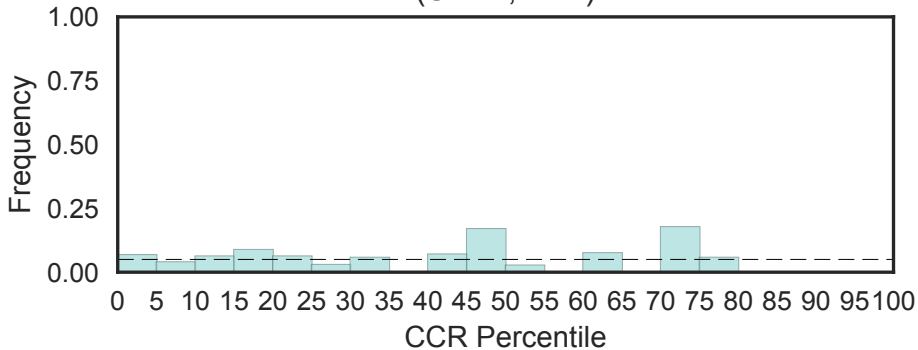

# Shikimate kinase (SKI, N=2)

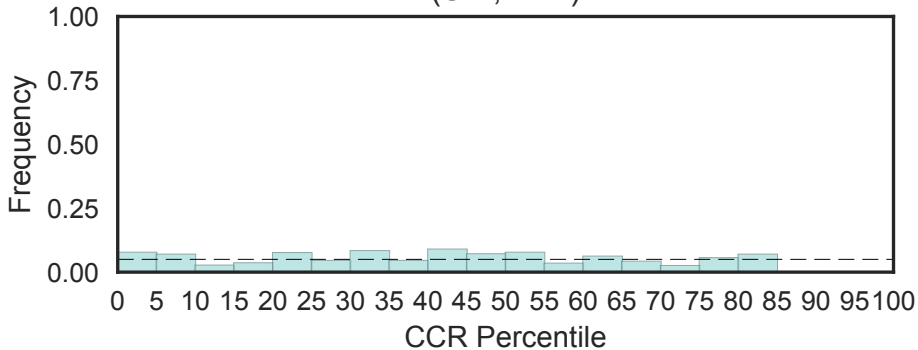

SKIP/SNW domain  
(SKIP\_SNW, N=1)

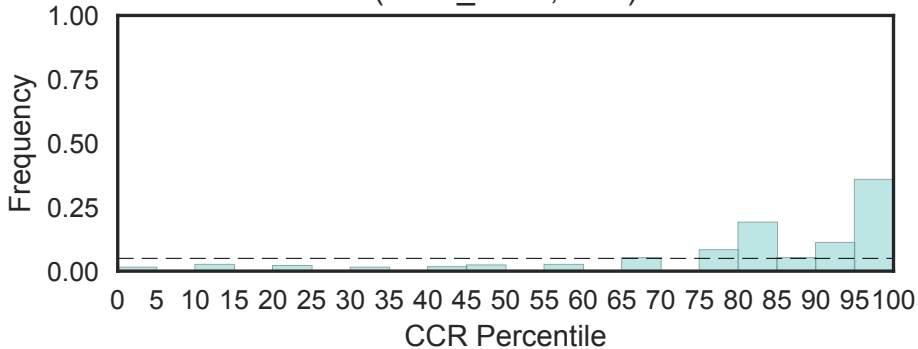

Calcium-activated SK potassium channel  
(SK\_channel, N=4)

Fisher's OR: 2.28; Bonferroni p-val: 1

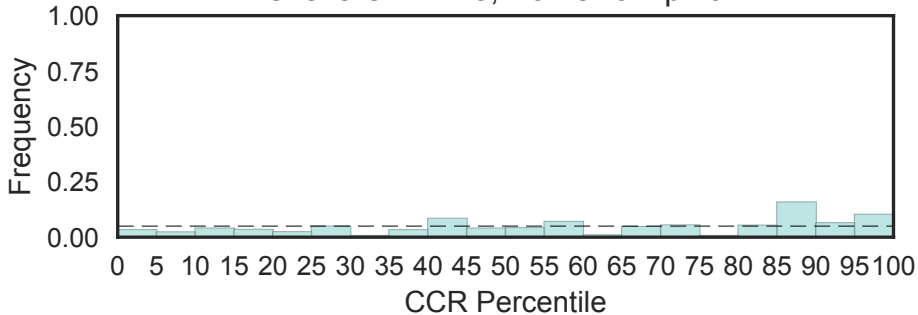

SLAIN motif-containing family  
(SLAIN, N=3)

Fisher's OR: 0.317; Bonferroni p-val: 1

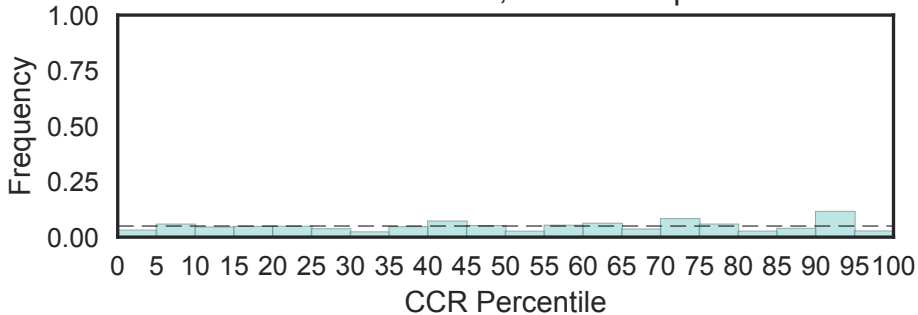

# Signaling lymphocytic activation molecule (SLAM) protein (SLAM, N=1)

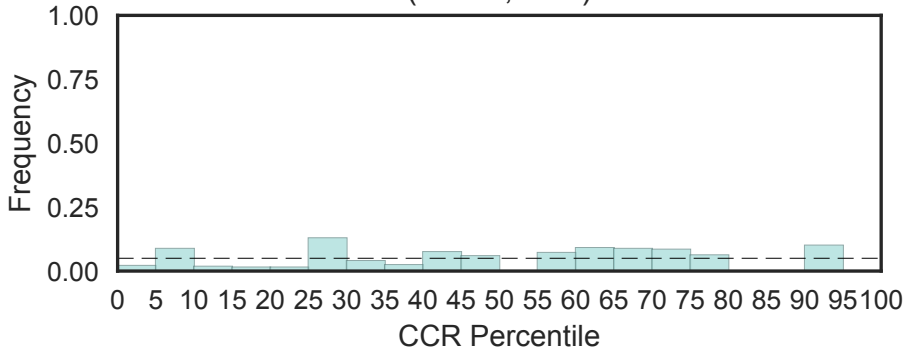

SLBB domain  
(SLBB, N=1)

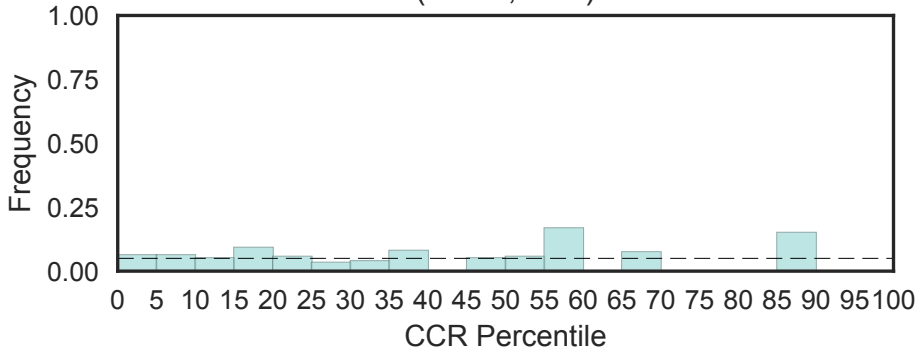

Histone RNA hairpin-binding protein RNA-binding domain  
(SLBP\_RNA\_bind, N=1)

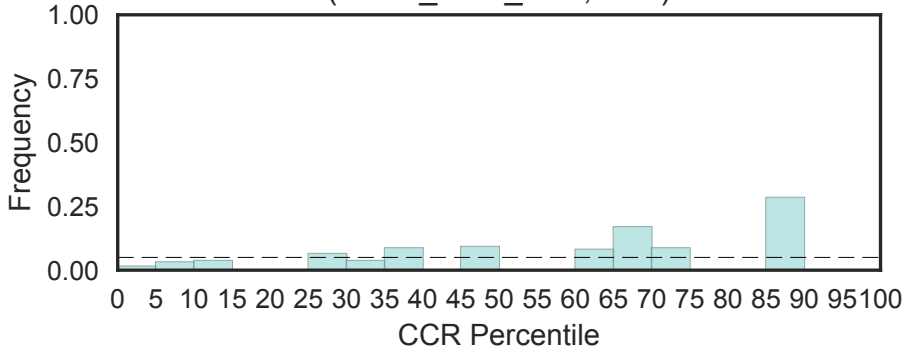



Solute carrier family 12  
(SLC12, N=15)

Fisher's OR: 0.682; Bonferroni p-val: 1

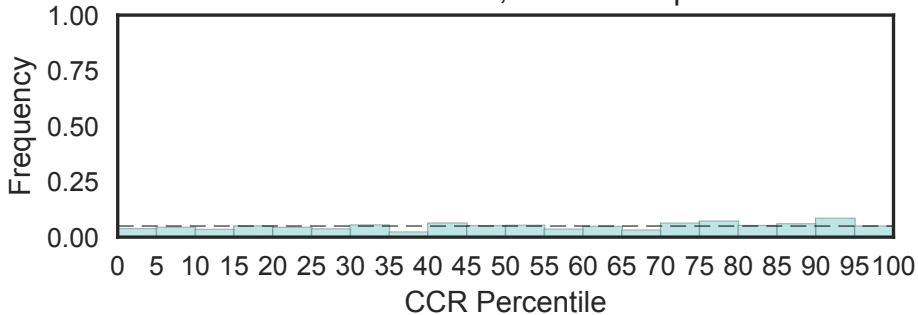

Solute carrier family 35  
(SLC35F, N=5)

Fisher's OR: 0.609; Bonferroni p-val: 1

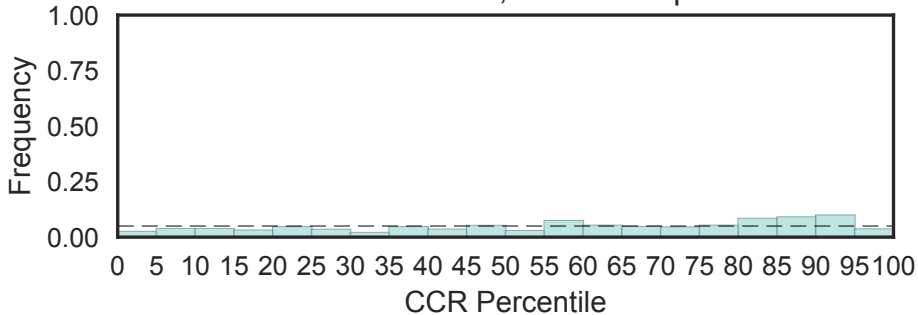

Solute carrier family 3 member 2 N-terminus  
(SLC3A2\_N, N=1)

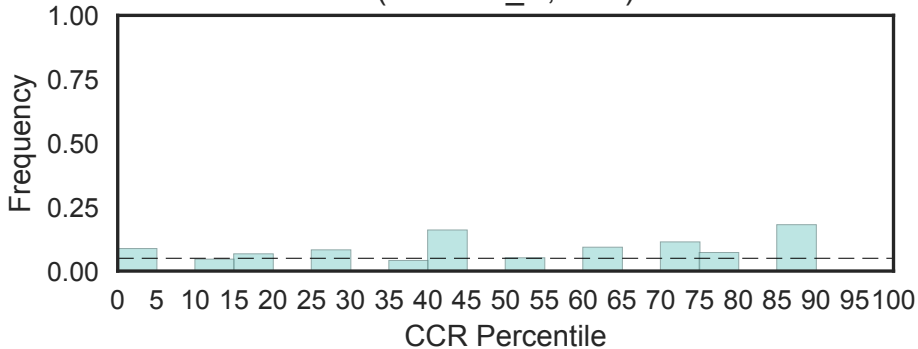

DNA replication complex GINS protein SLD5 C-terminus  
(SLD5\_C, N=1)

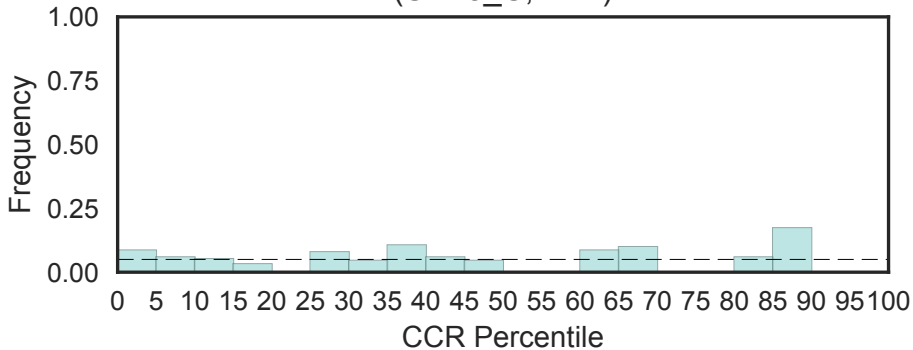

SLED domain  
(SLED, N=4)

Fisher's OR: 0.965; Bonferroni p-val: 1

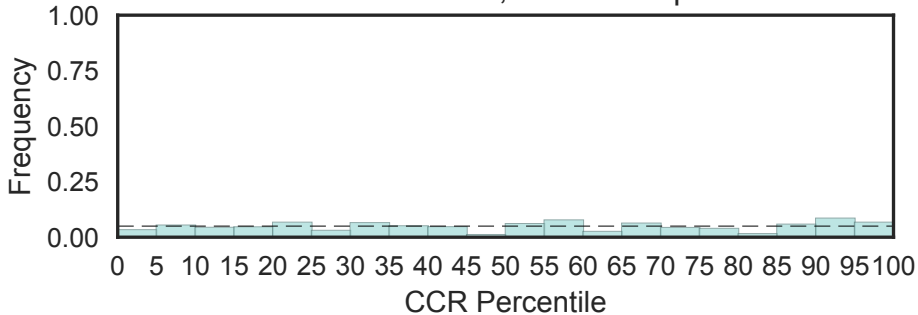

# SLIDE (SLIDE, N=1)

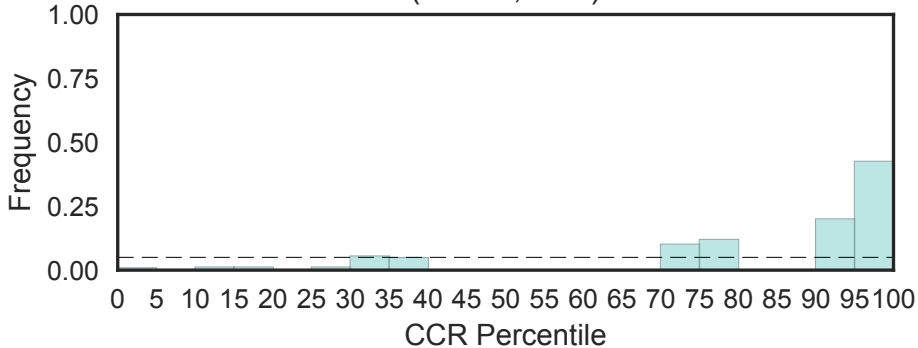

Ribosome biogenesis protein SLX9  
(SLX9, N=1)

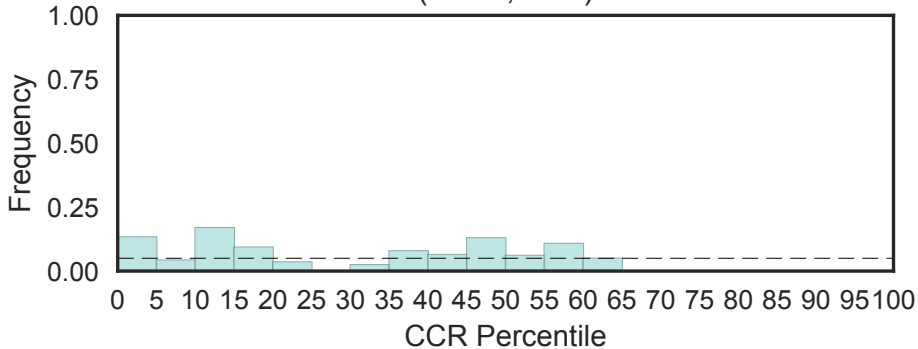

Lymphocyte signaling adaptor protein  
(SLY, N=2)

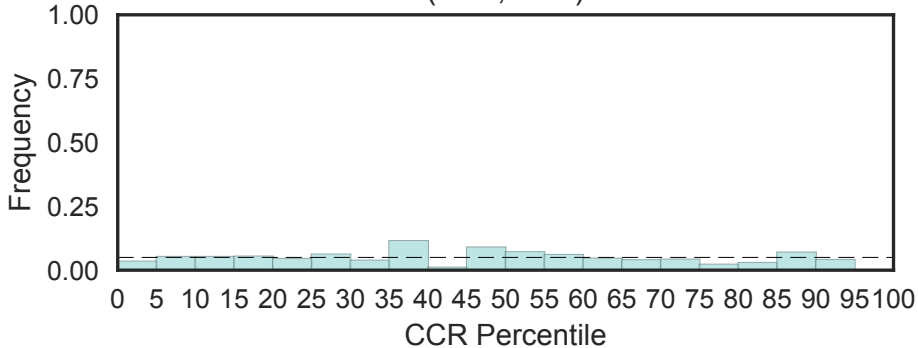



Ataxin 2 SM domain  
(SM-ATX, N=4)

Fisher's OR: 3.28; Bonferroni p-val: 1

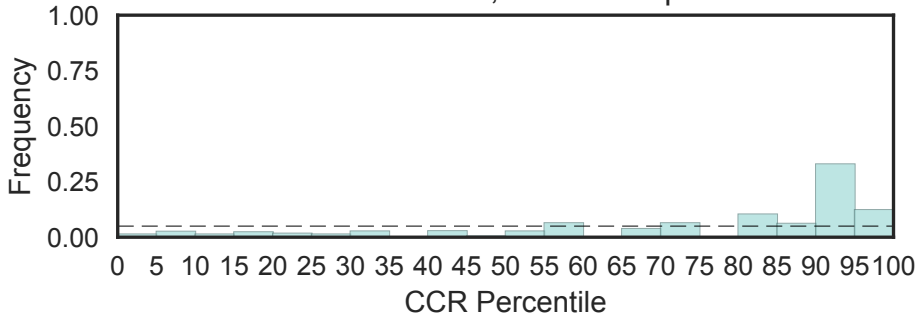

Small acidic protein family  
(SMAP, N=3)

Fisher's OR: 3.09; Bonferroni p-val: 1

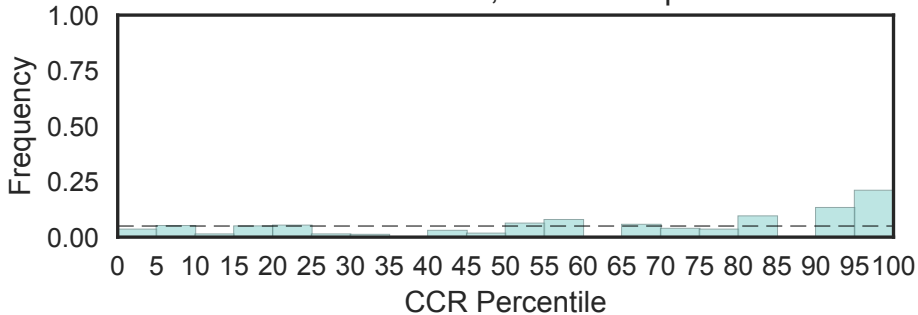

RecF/RecN/SMC N terminal domain  
(SMC\_N, N=8)

Fisher's OR: 2.39; Bonferroni p-val: 0.00802

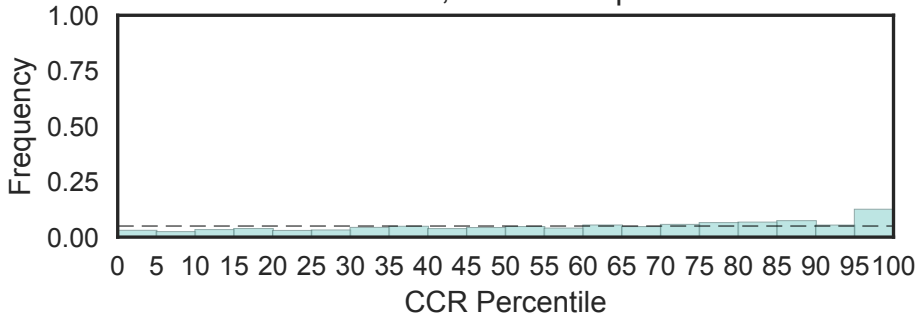

Nse1 non-SMC component of SMC5-6 complex  
(SMC\_Nse1, N=1)

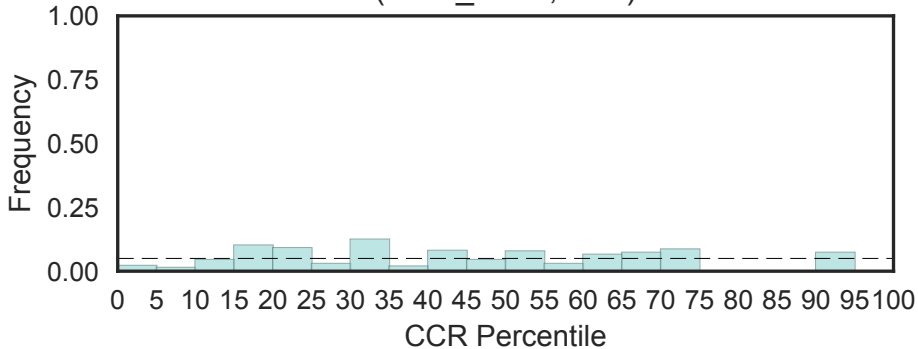

SMC proteins Flexible Hinge Domain  
(SMC\_hinge, N=5)

Fisher's OR: 0.588; Bonferroni p-val: 1

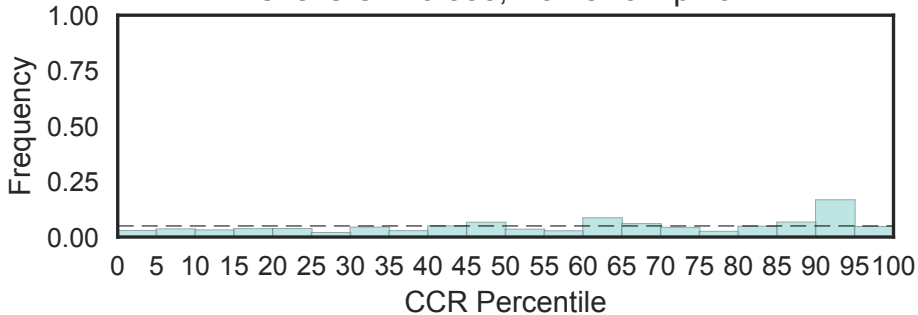

SMI1 / KNR4 family (SUKH-1)  
(SMI1\_KNR4, N=1)

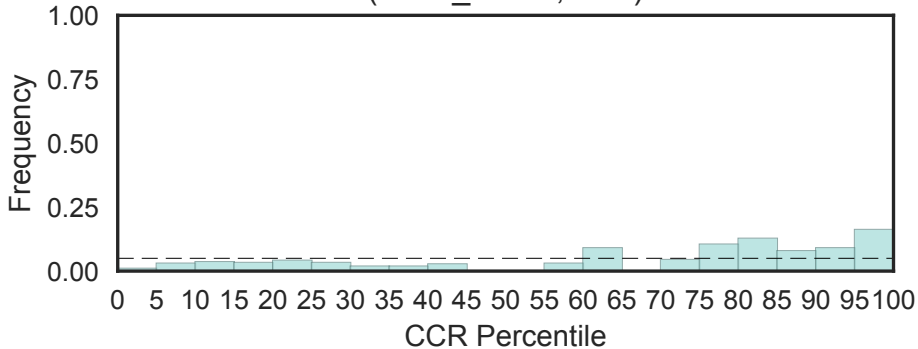

Component of IIS longevity pathway SMK-1  
(SMK-1, N=2)

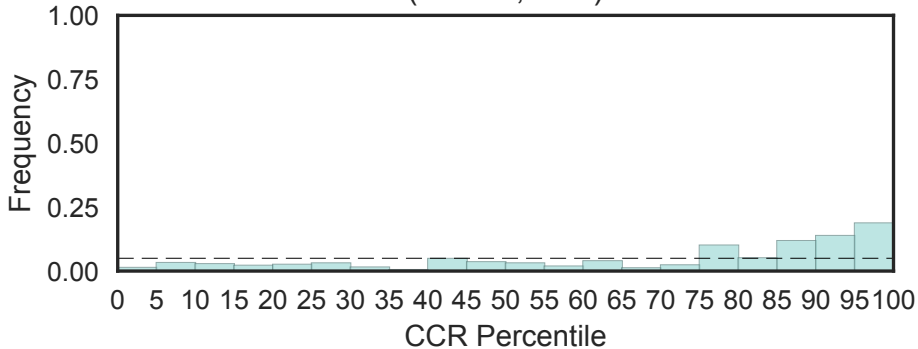

Survival motor neuron protein (SMN)  
(SMN, N=4)

Fisher's OR: 5.84; Bonferroni p-val: 1

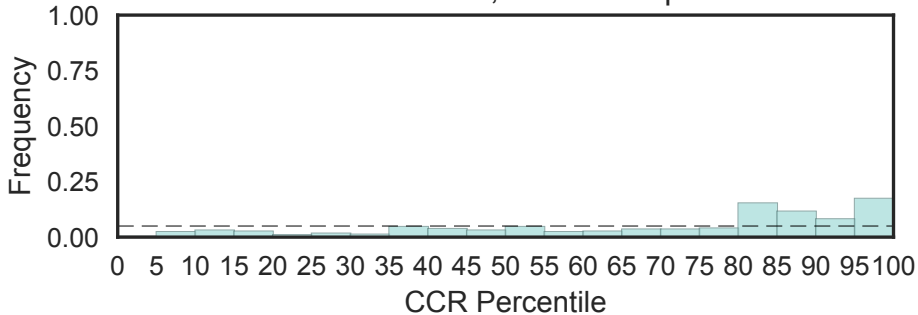



Synaptotagmin-like mitochondrial-lipid-binding domain  
(SMP\_LBD, N=3)

Fisher's OR: 0; Bonferroni p-val: 1

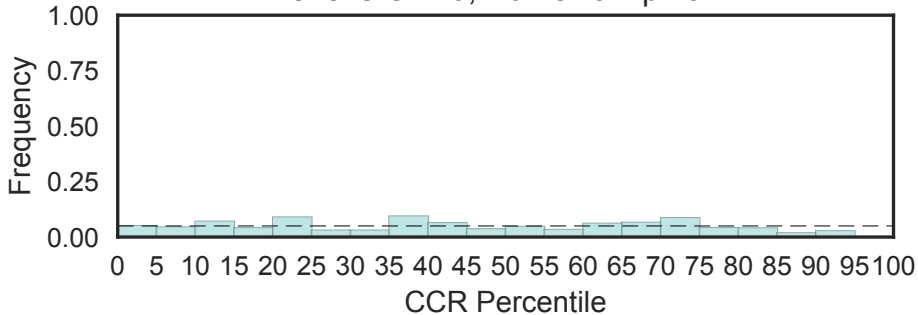

# Spermatid-specific manchette-related protein 1 (SMRP1, N=1)

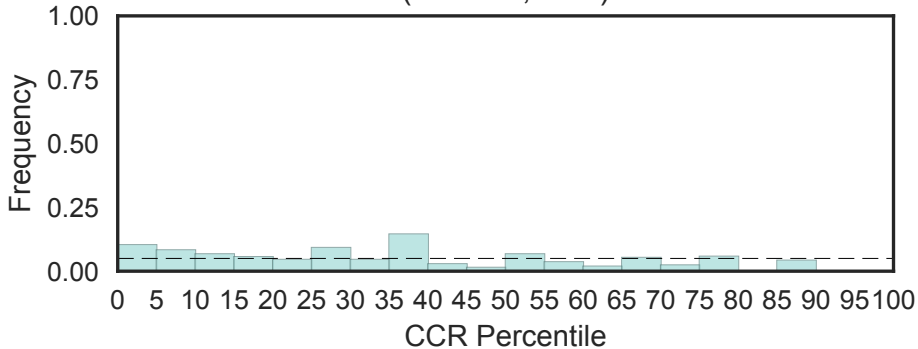

Soluble NSF attachment protein, SNAP  
(SNAP, N=5)

Fisher's OR: 1.18; Bonferroni p-val: 1

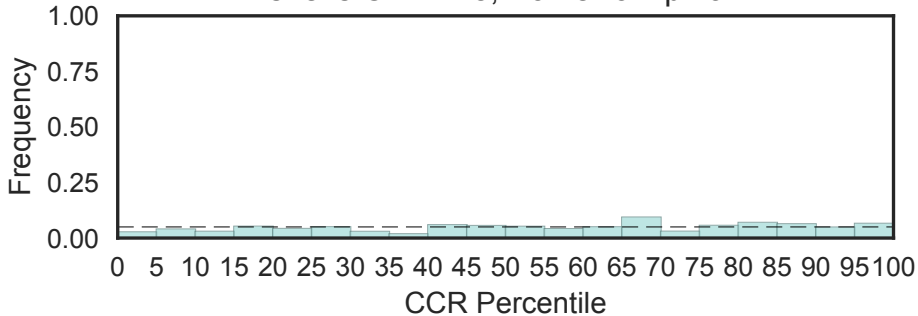

SNAP-25 family  
(SNAP-25, N=2)

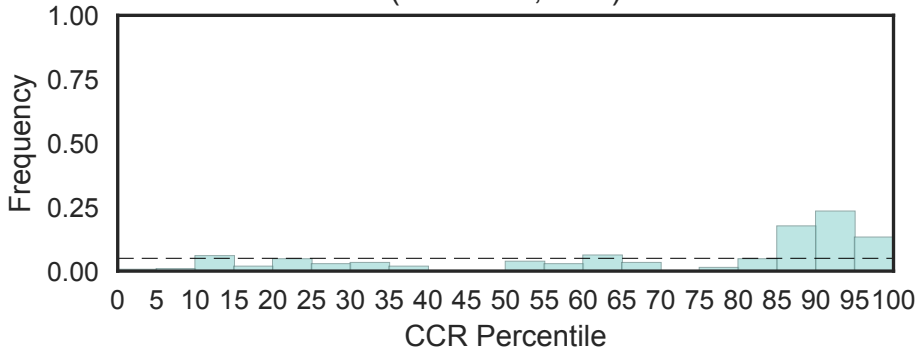

snRNA-activating protein complex subunit 19, SNAPc subunit 19  
(SNAPc19, N=1)

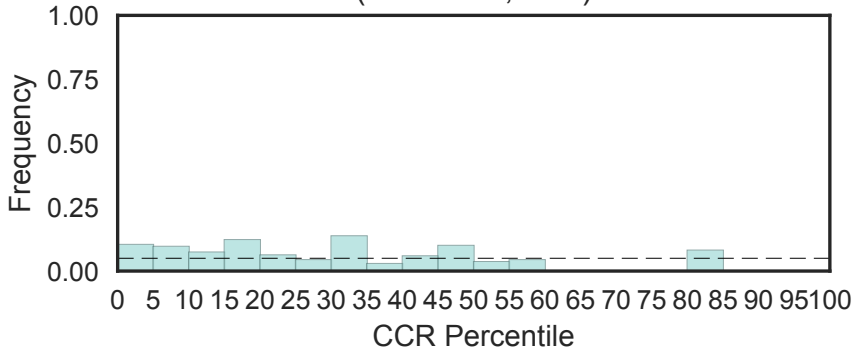

Small nuclear RNA activating complex (SNAPc), subunit SNAP43  
(SNAPc\_SNAP43, N=1)

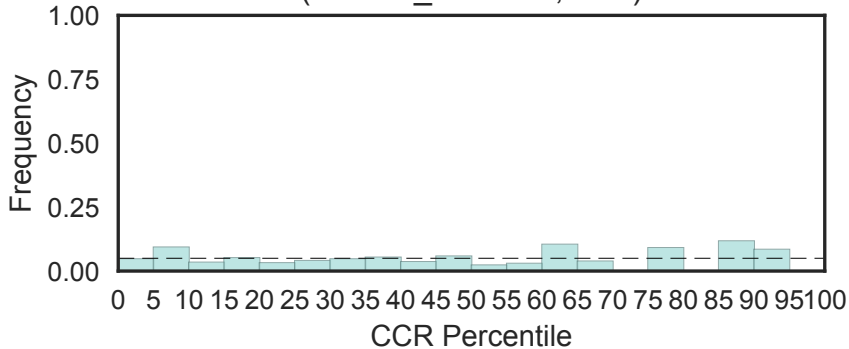

SNARE domain  
(SNARE, N=14)

Fisher's OR: 0.337; Bonferroni p-val: 1

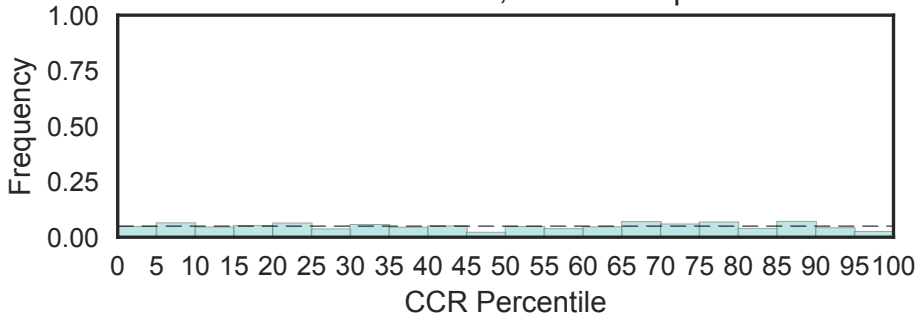

SNARE associated Golgi protein  
(SNARE\_assoc, N=4)  
Fisher's OR: 3.14; Bonferroni p-val: 1

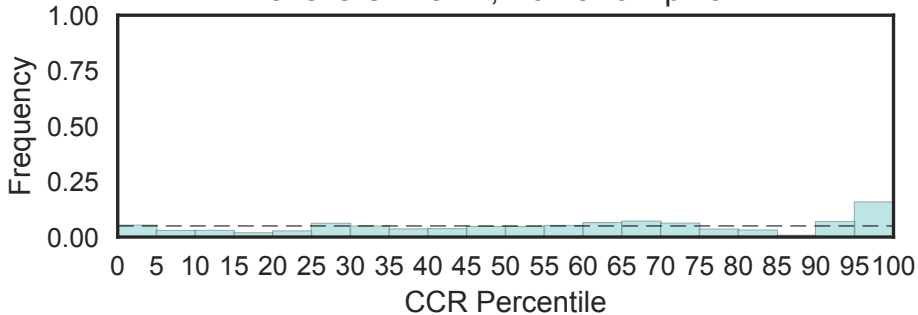



Synphilin-1 alpha-Synuclein-binding domain  
(SNCAIP\_SNCA\_bd, N=1)

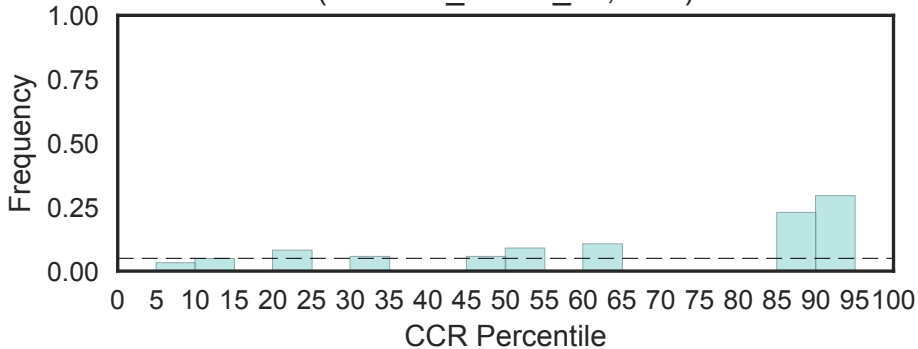

Sodium:neurotransmitter symporter family  
(SNF, N=19)

Fisher's OR: 0.79; Bonferroni p-val: 1

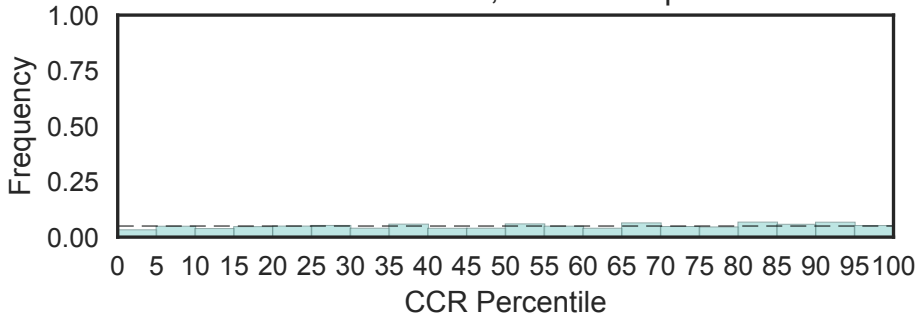

SNF2 family N-terminal domain  
(SNF2\_N, N=29)

Fisher's OR: 5.98; Bonferroni p-val: 2.12e-45

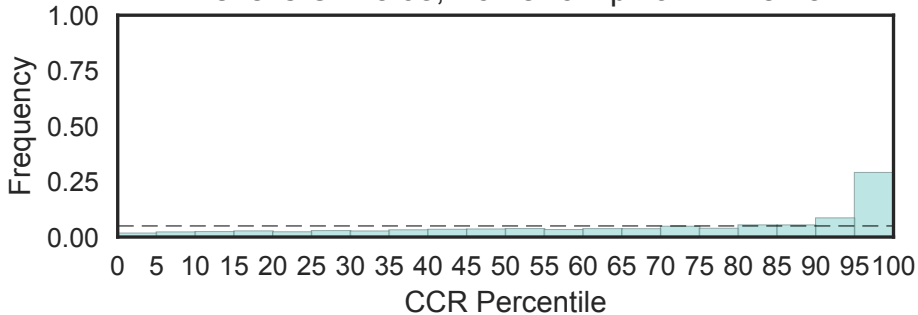

SNF5 / SMARCB1 / INI1  
(SNF5, N=2)

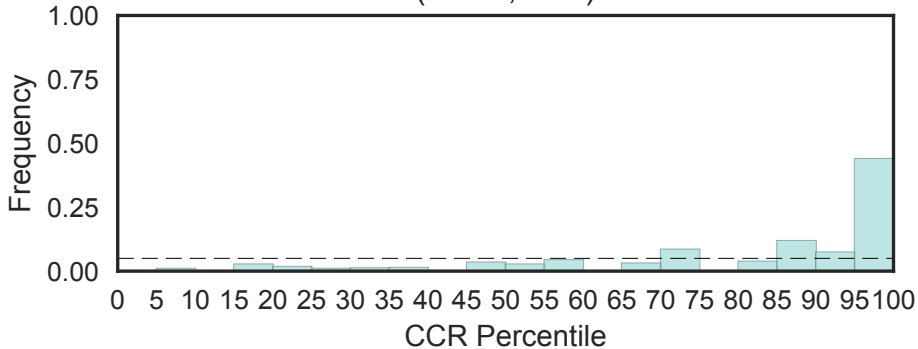

Stannin cytoplasmic  
(SNN\_cytoplasm, N=1)

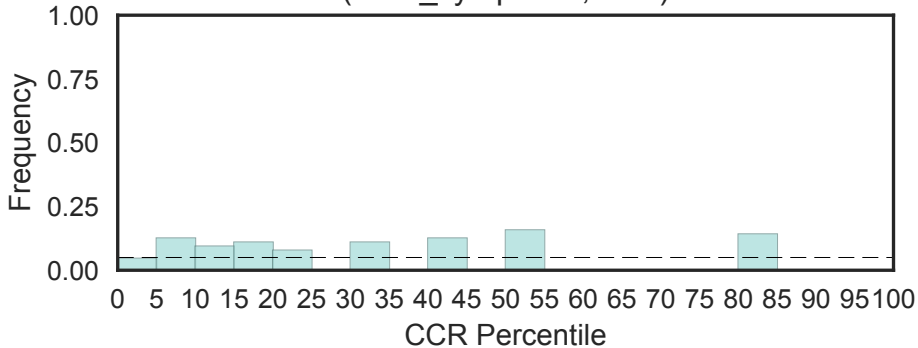

# Stannin unstructured linker (SNN\_linker, N=1)

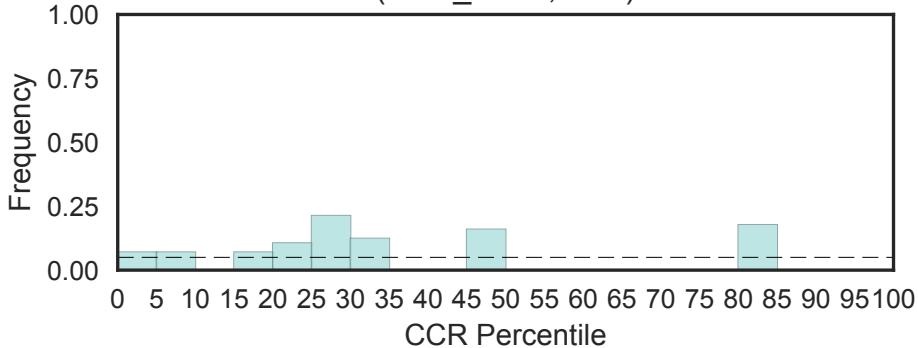

Stannin transmembrane  
(SNN\_transmemb, N=1)

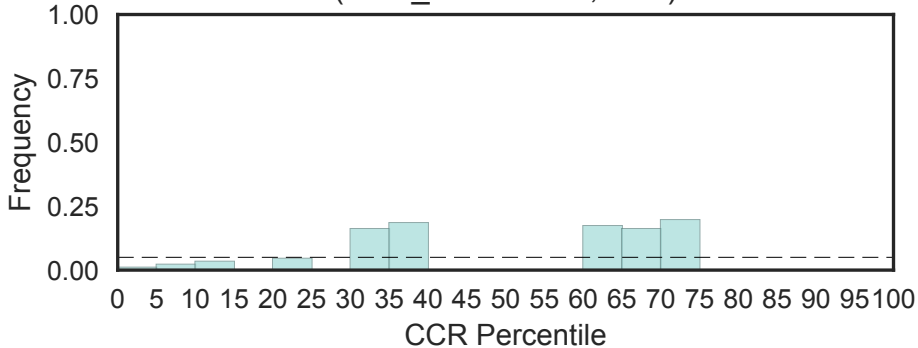

SNURF/RPN4 protein  
(SNURF, N=2)

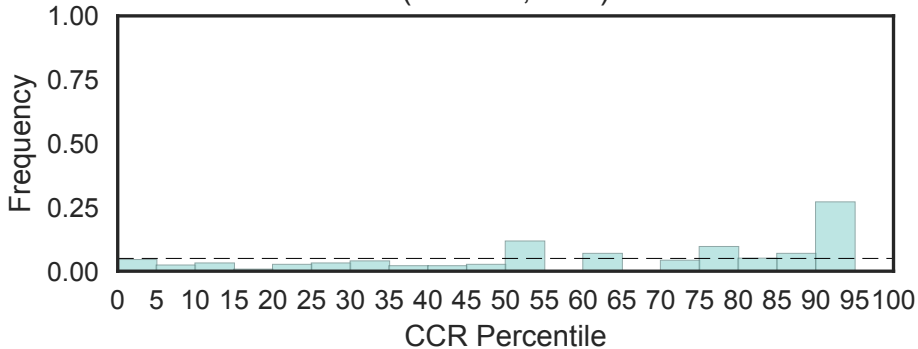



Staphylococcal nuclease homologue  
(SNase, N=6)

Fisher's OR: 2.14; Bonferroni p-val: 1

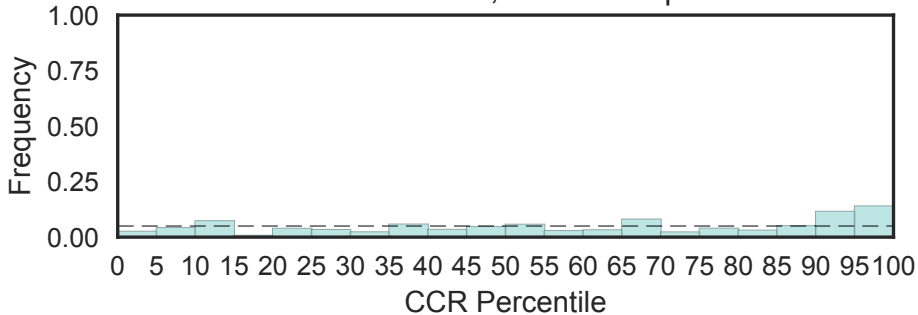

STIM1 Orai1-activating region  
(SOAR, N=2)

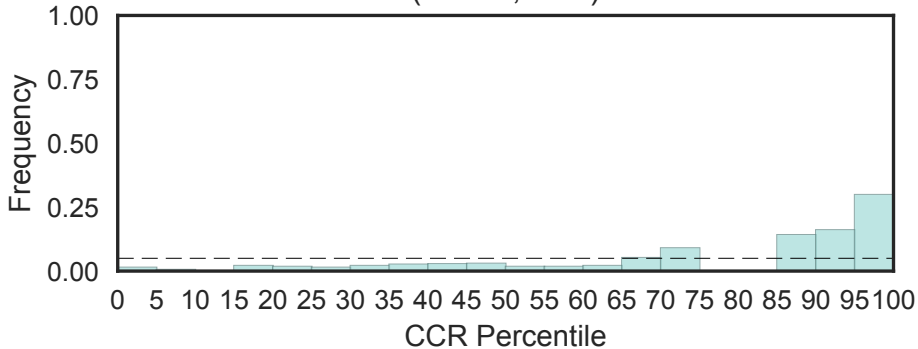

# Sine oculis-binding protein (SOBP, N=1)

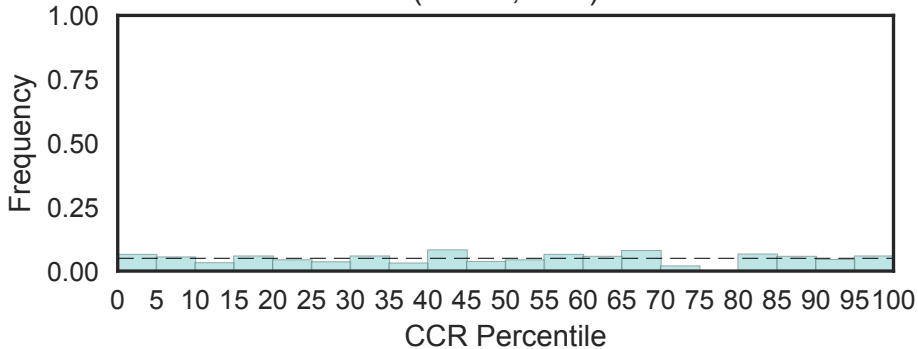

# Suppressor of cytokine signalling (SOCS, N=2)

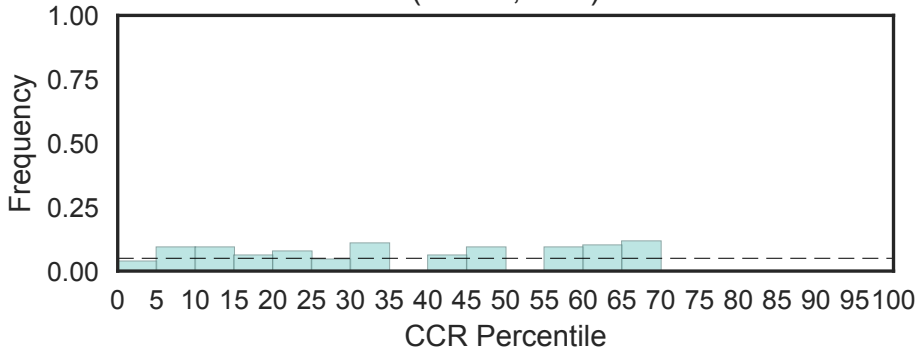

SOCS box  
(SOCS\_box, N=32)  
Fisher's OR: 0; Bonferroni p-val: 1

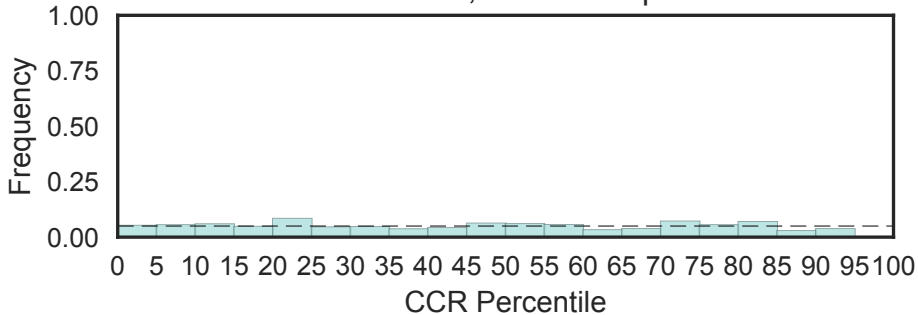

Protein SOGA  
(SOGA, N=6)

Fisher's OR: 3.75; Bonferroni p-val: 1

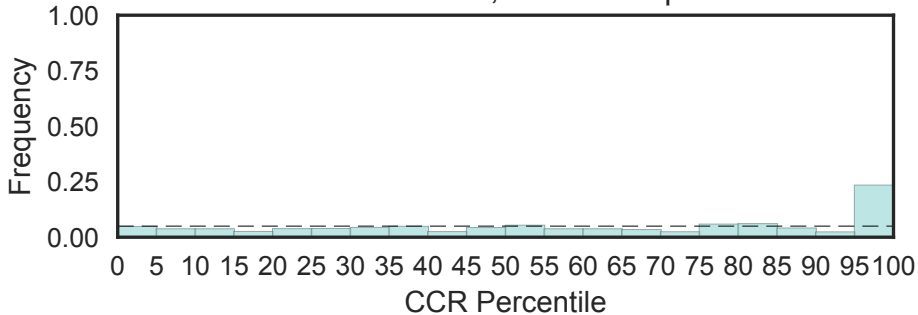

SOSS complex subunit C  
(SOSSC, N=1)

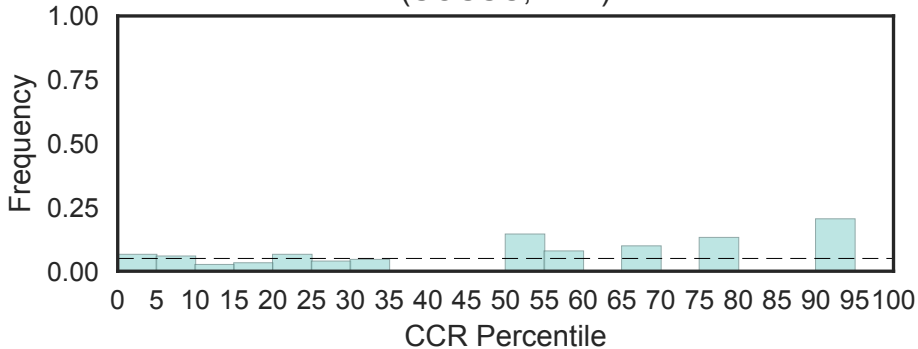

# SOUL heme-binding protein (SOUL, N=2)

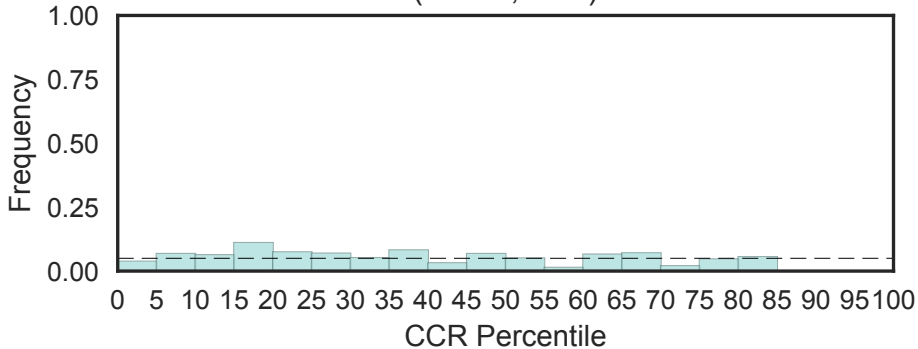



SOX transcription factor  
(SOXp, N=4)

Fisher's OR: 1.46; Bonferroni p-val: 1

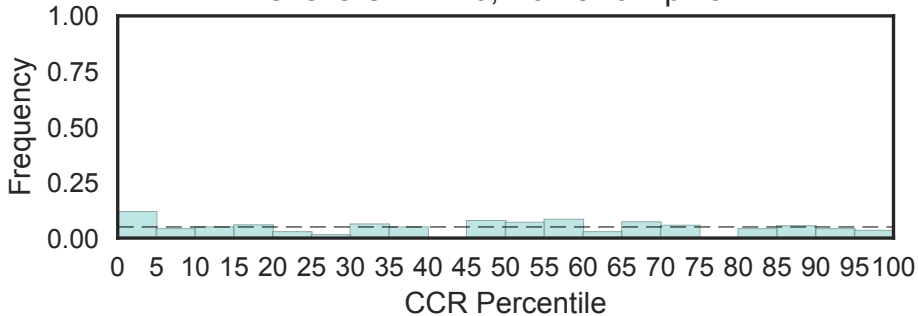

Stabilization of polarity axis  
(SPA, N=5)

Fisher's OR: 0.591; Bonferroni p-val: 1

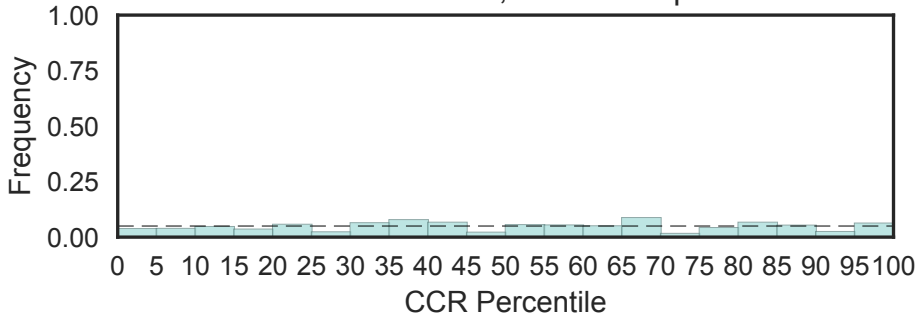

# Sperm acrosome-associated protein 7 (SPACA7, N=1)

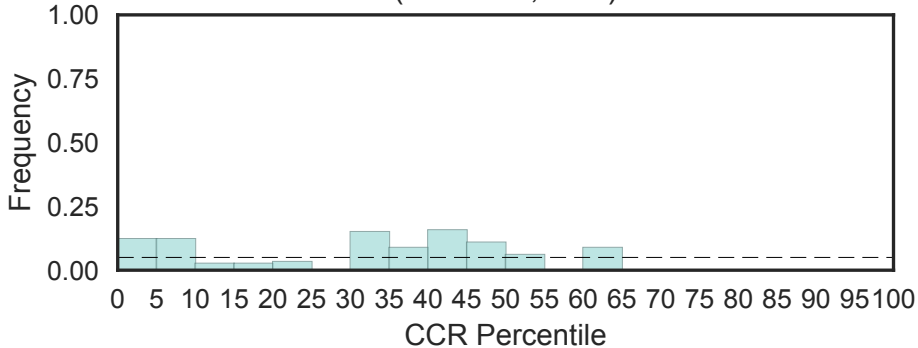

Sperm acrosome-associated protein 9  
(SPACA9, N=1)

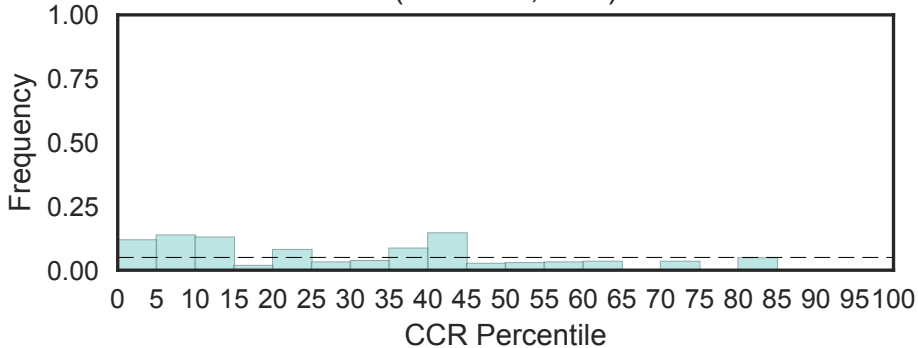

Secreted protein acidic and rich in cysteine Ca binding region  
(SPARC\_Ca\_bdg, N=9)

Fisher's OR: 0.618; Bonferroni p-val: 1

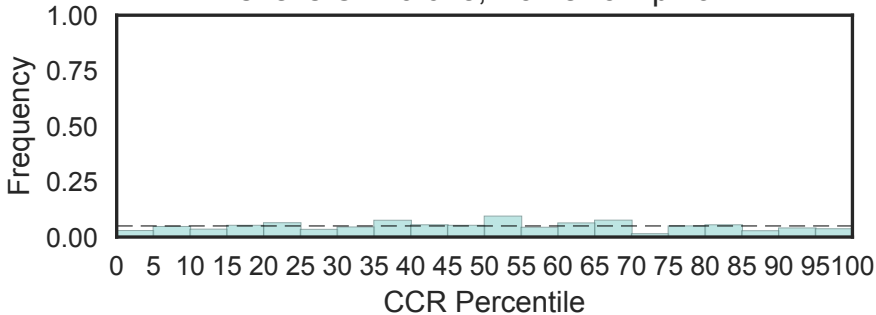

C-terminal domain of SPAR protein  
(SPAR\_C, N=3)

Fisher's OR: 0.832; Bonferroni p-val: 1

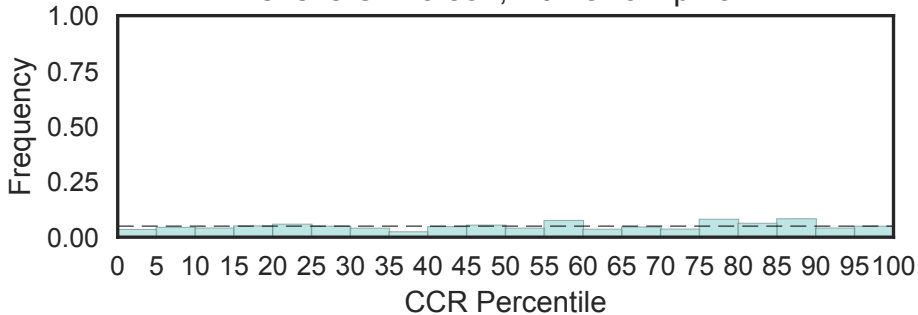

# Spermatogenesis-associated protein 19, mitochondrial (SPATA19, N=1)

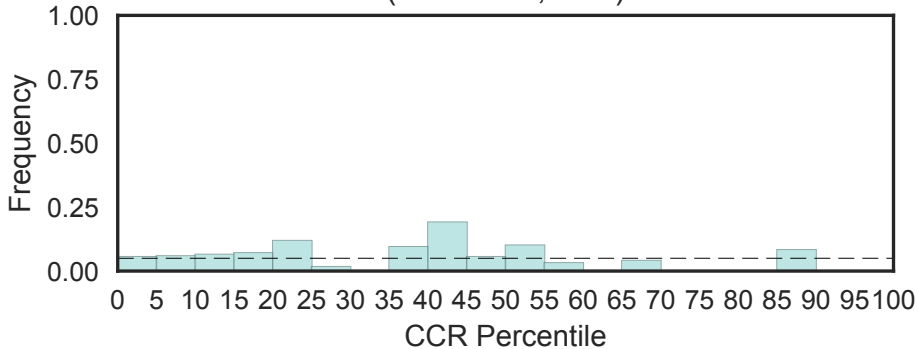

# Spermatogenesis-associated protein 24 (SPATA24, N=1)

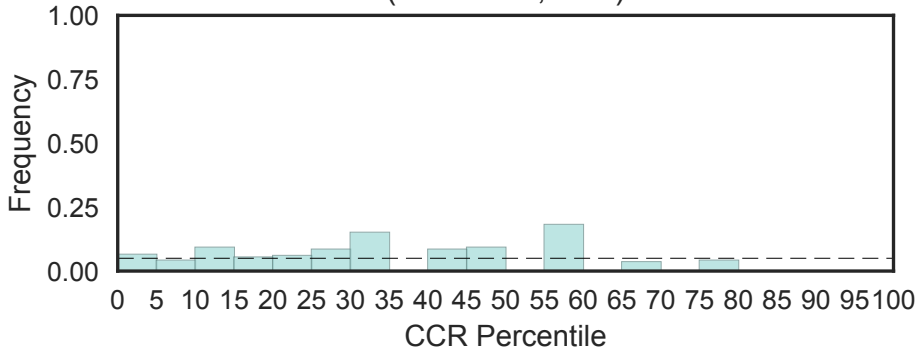



# Spermatogenesis-associated protein 25 (SPATA25, N=1)

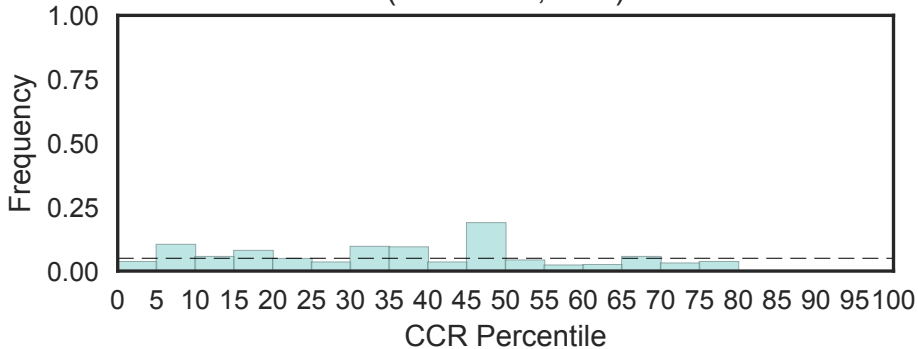

Spermatogenesis-associated protein 3 family  
(SPATA3, N=1)

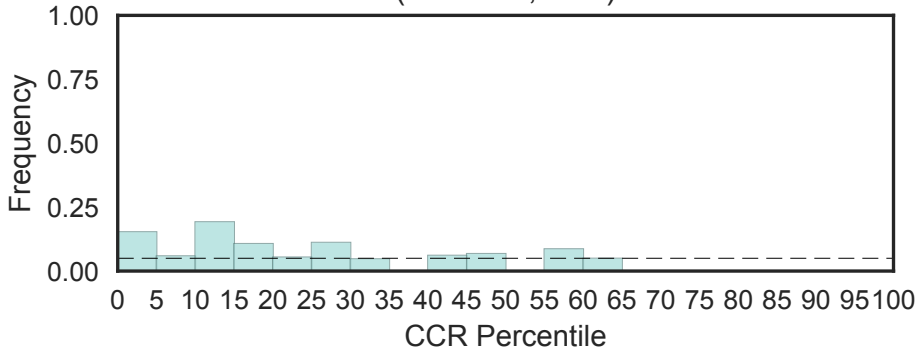

Spermatogenesis-assoc protein 6  
(SPATA6, N=3)

Fisher's OR: 0; Bonferroni p-val: 1

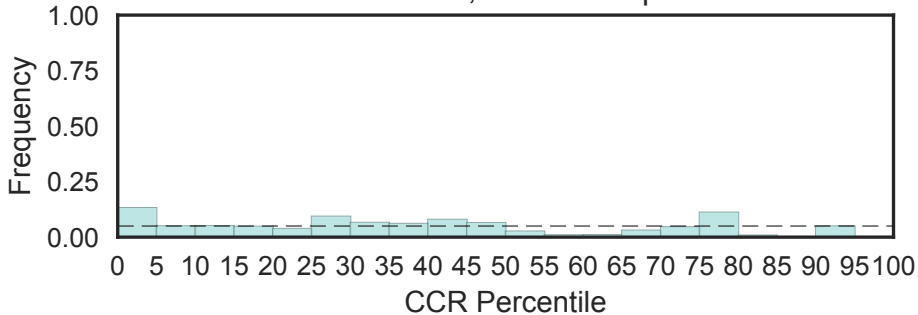

# Spermatogenesis-associated protein 9 (SPATA9, N=1)

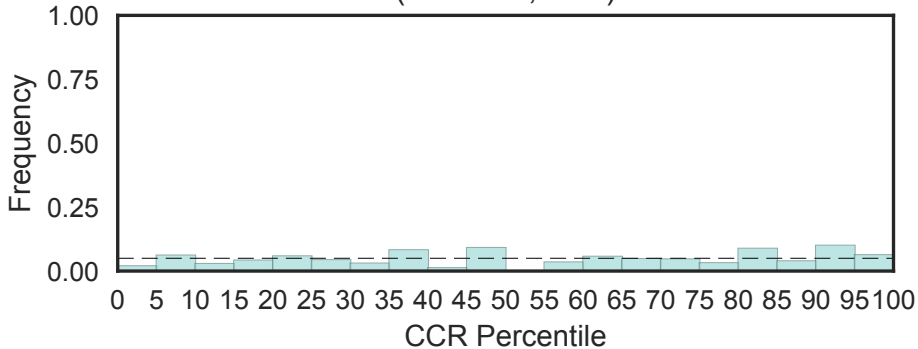

# SPATIAL (SPATIAL, N=2)

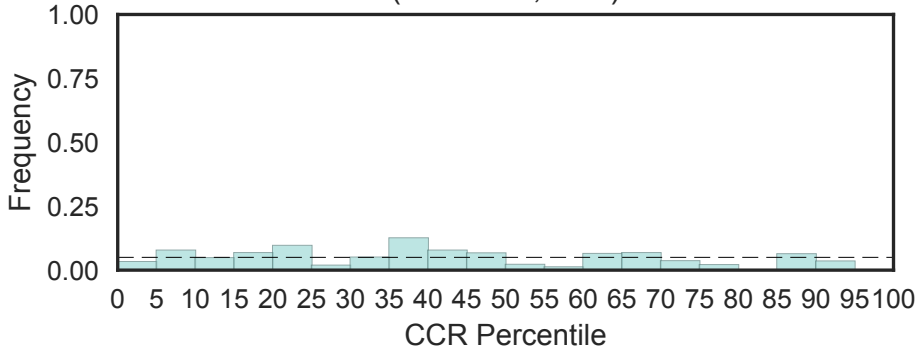

Microsomal signal peptidase 12 kDa subunit (SPC12)  
(SPC12, N=1)

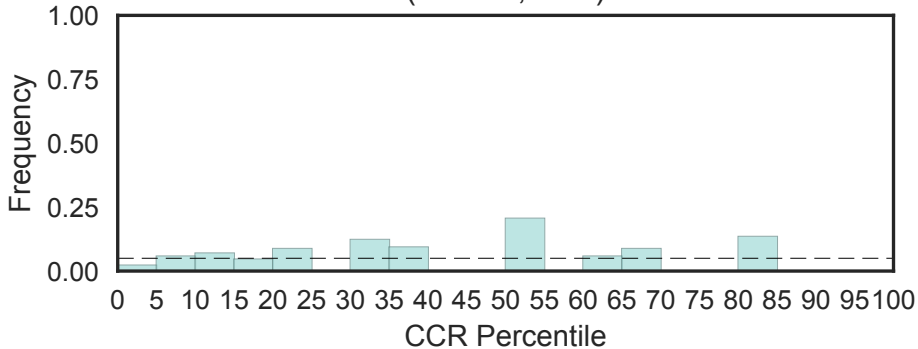

Signal peptidase subunit  
(SPC22, N=1)

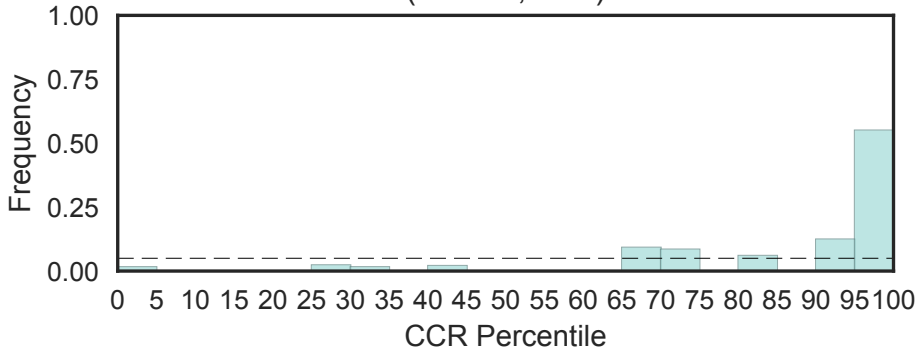

Microsomal signal peptidase 25 kDa subunit (SPC25)  
(SPC25, N=1)

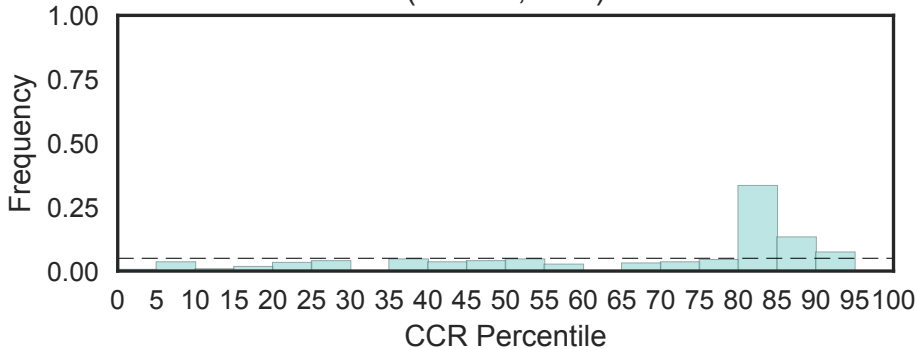



Unstructured region on SPEG complex protein  
(SPEG\_u2, N=1)

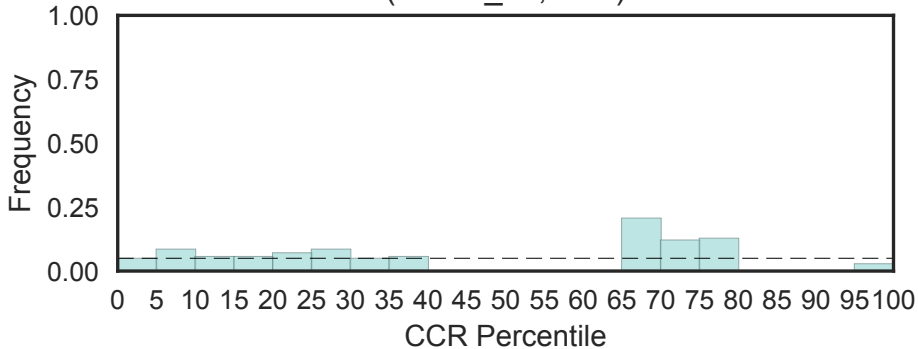

# Sperm equatorial segment protein 1 (SPESP1, N=2)

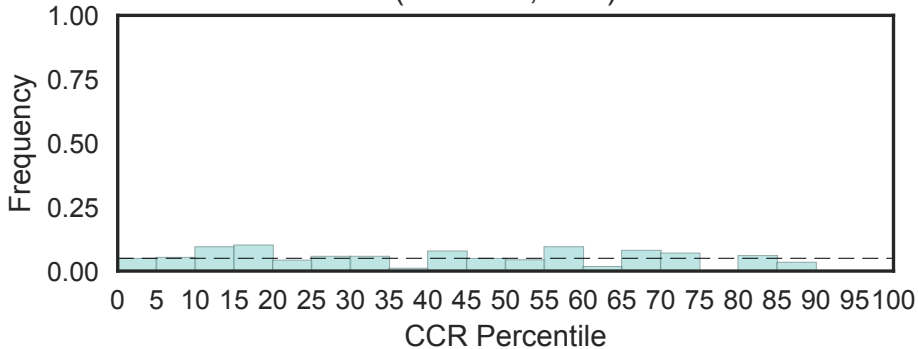

AP-5 complex subunit, vesicle trafficking  
(SPG48, N=1)

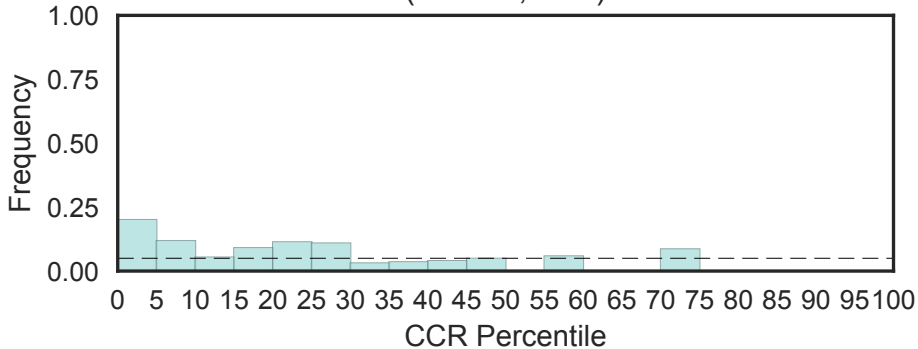

# Centriole duplication and mitotic chromosome congression (SPICE, N=1)

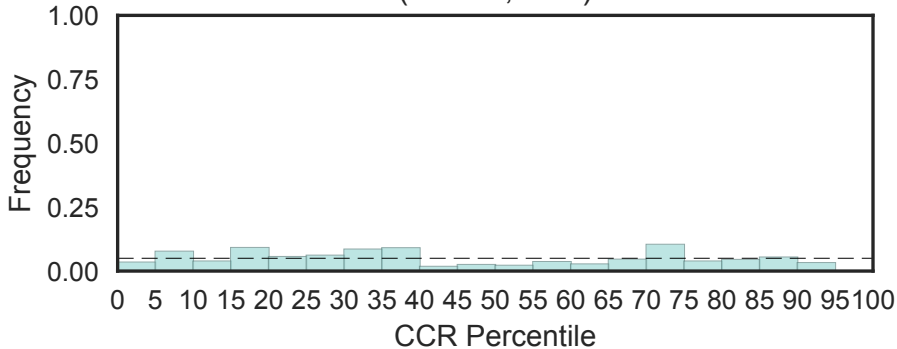

SPO11 homologue  
(SPO11\_like, N=1)

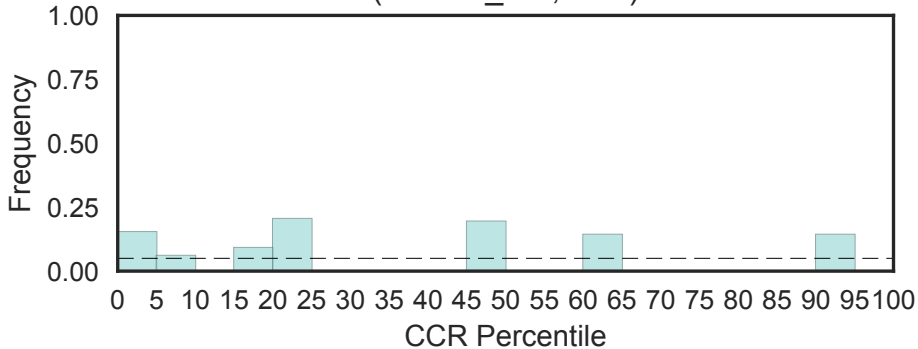

SPOC domain  
(SPOC, N=6)

Fisher's OR: 0.778; Bonferroni p-val: 1

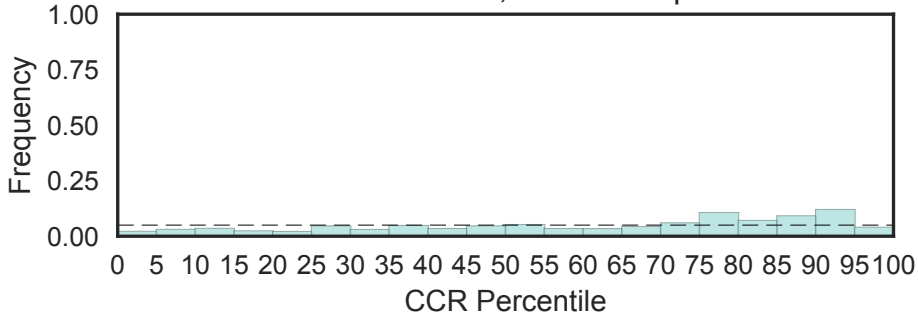

Small proline-rich 2  
(SPRR2, N=6)

Fisher's OR: 0; Bonferroni p-val: 1

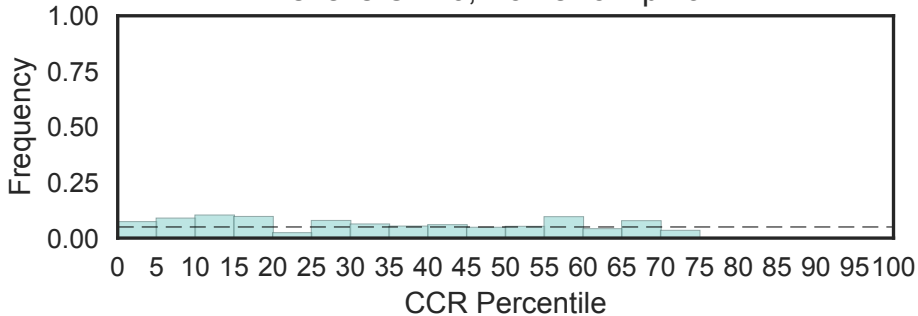

SPRY domain  
(SPRY, N=95)

Fisher's OR: 0.476; Bonferroni p-val: 1

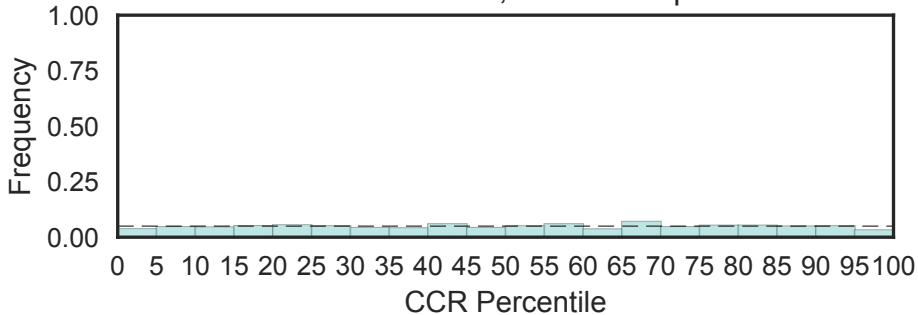



FACT complex subunit (SPT16/CDC68)  
(SPT16, N=1)

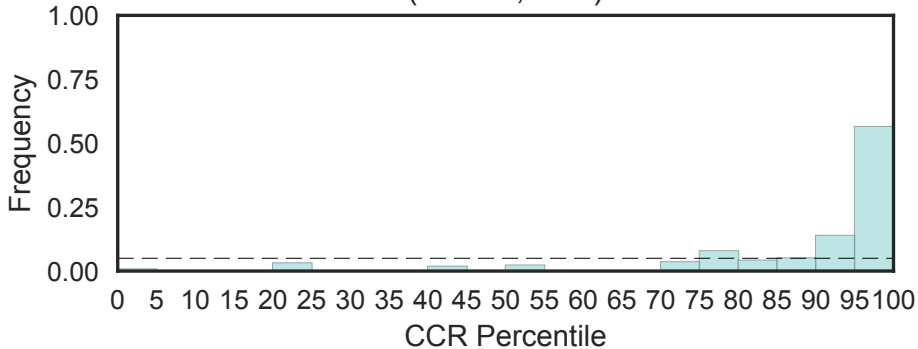

# SPT2 chromatin protein (SPT2, N=1)

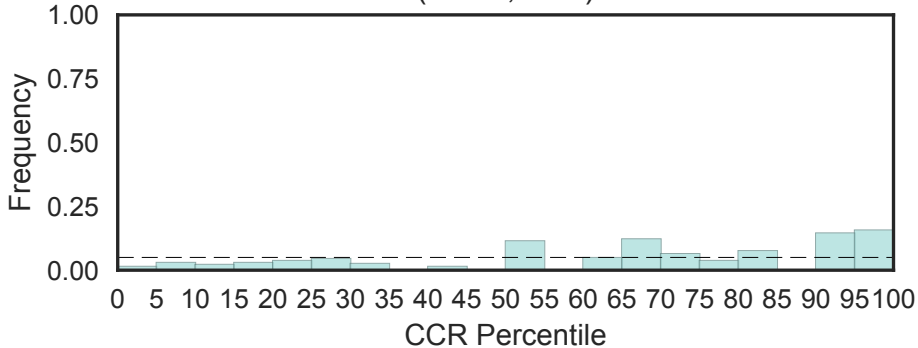

Acidic N-terminal SPT6  
(SPT6\_acidic, N=1)

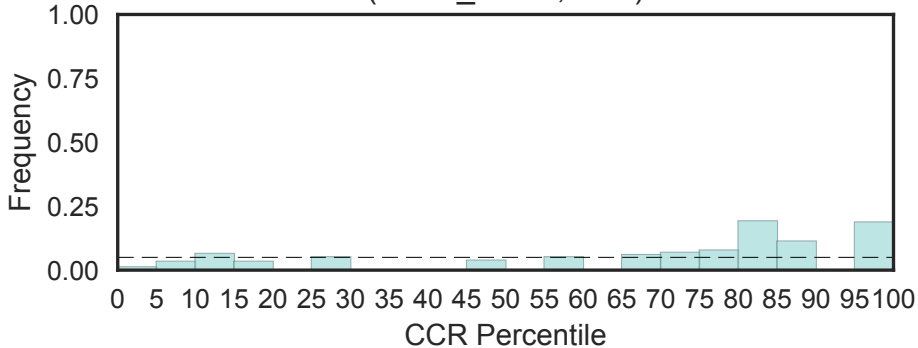

Small subunit of serine palmitoyltransferase-like  
(SPT\_ssu-like, N=2)

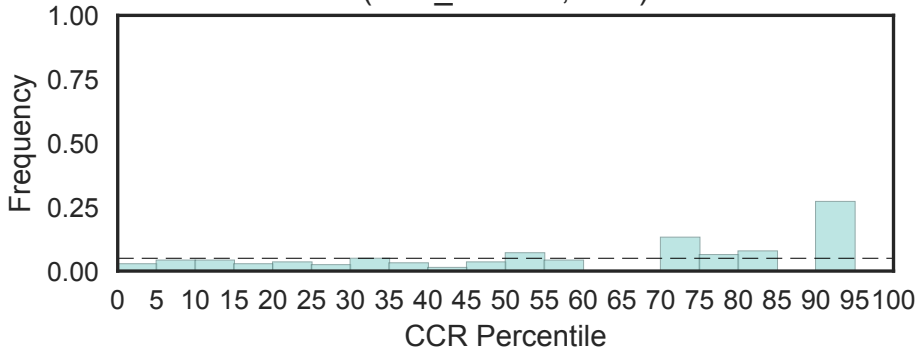

SPX domain  
(SPX, N=3)

Fisher's OR: 21.6; Bonferroni p-val: 0.392

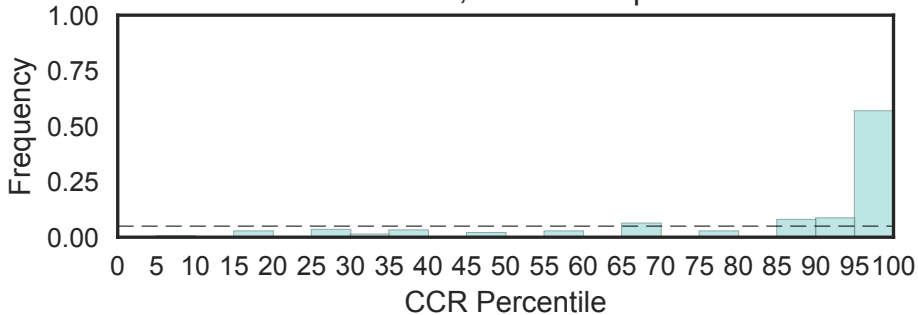

Surfactant protein C, N terminal propeptide  
(SP\_C-Propep, N=1)

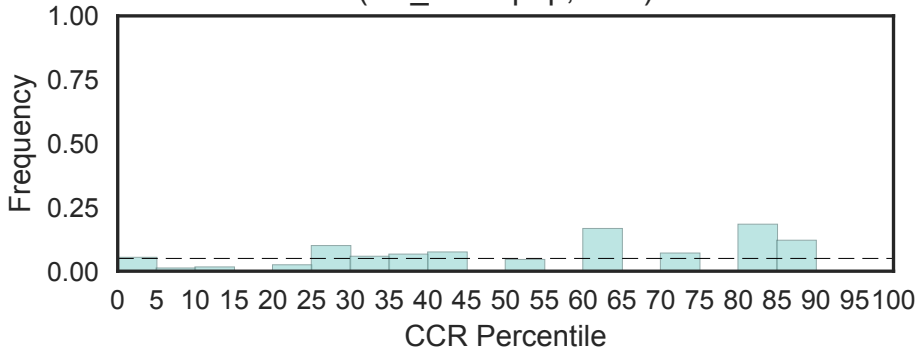

Squalene-hopene cyclase C-terminal domain  
(SQHop\_cyclase\_C, N=2)

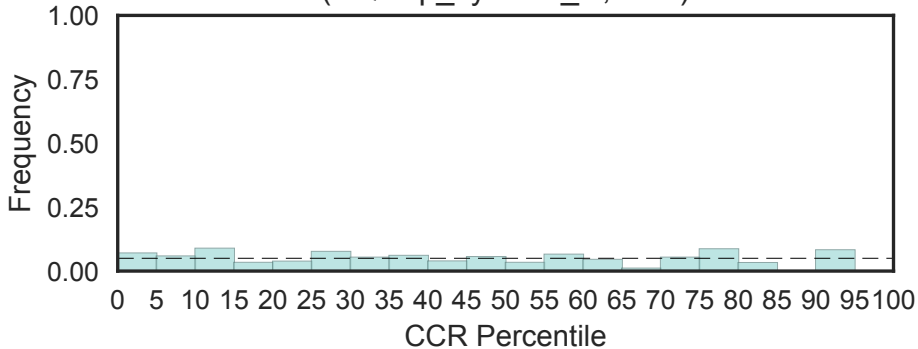

Squalene-hopene cyclase N-terminal domain  
(SQHop\_cyclase\_N, N=1)

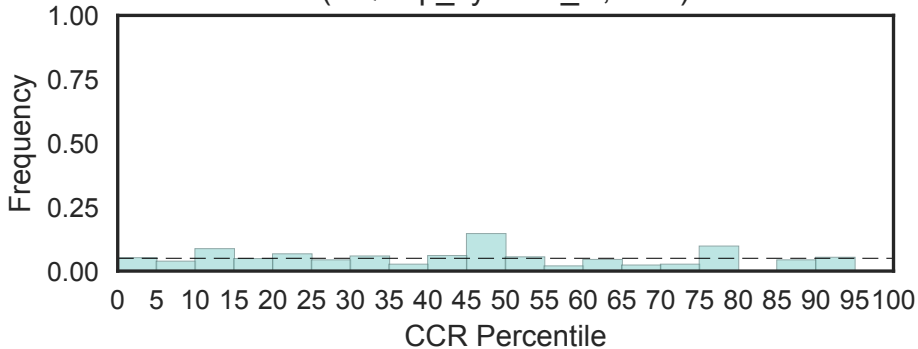



# Squalene/phytoene synthase (SQS\_PSY, N=2)

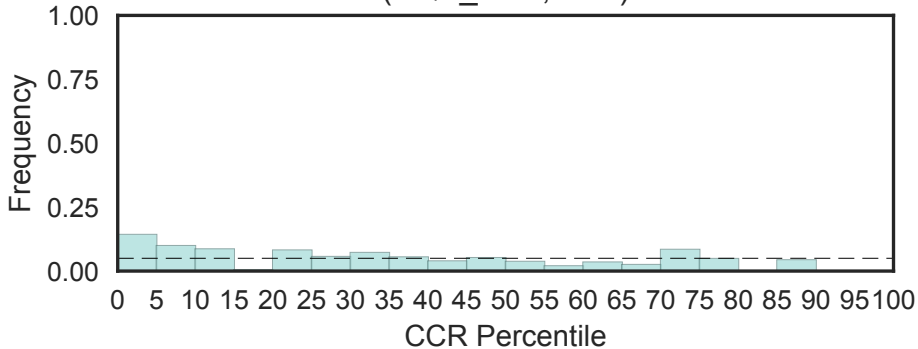

# Nuclear RNA-splicing-associated protein (SR-25, N=1)

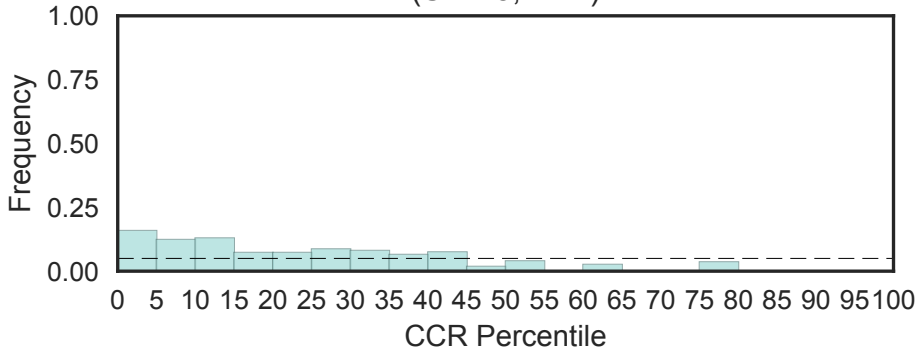

Steroid receptor RNA activator (SRA1)  
(SRA1, N=1)

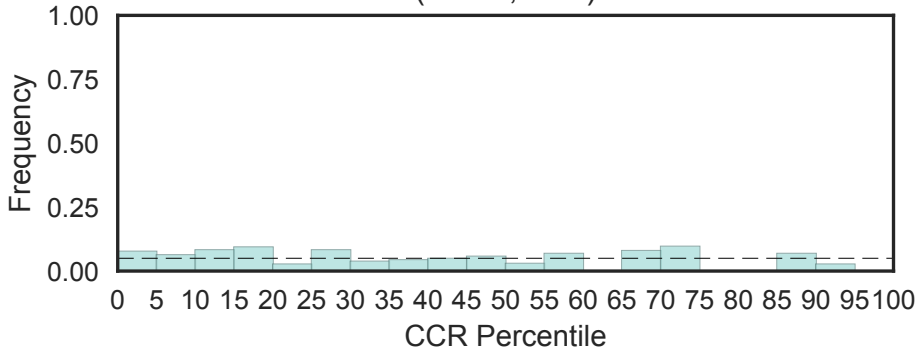

SOS response associated peptidase (SRAP)  
(SRAP, N=1)

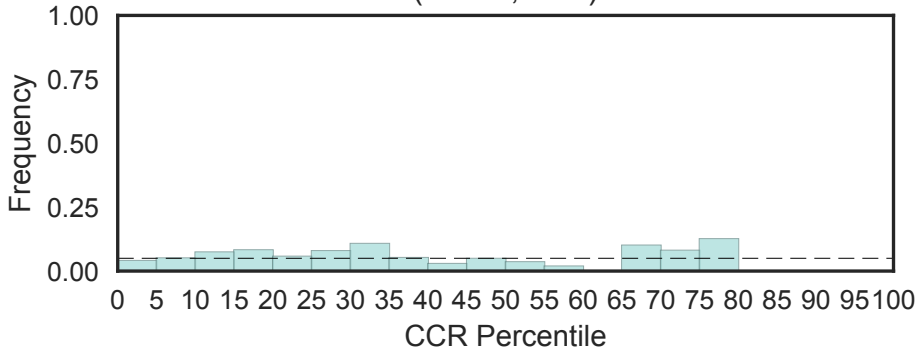

Steroid receptor coactivator  
(SRC-1, N=3)

Fisher's OR: 1.37; Bonferroni p-val: 1

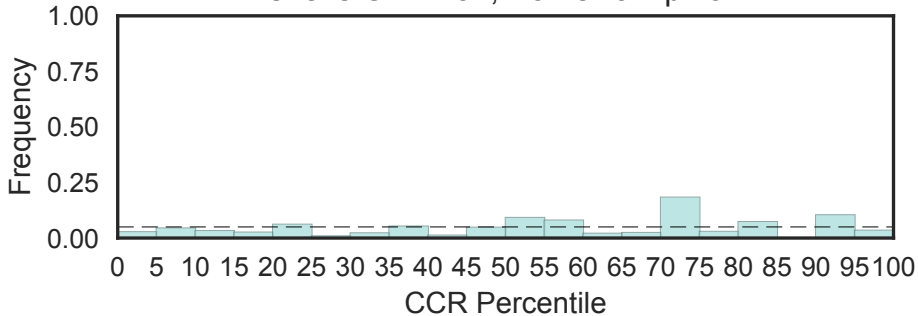

Scavenger receptor cysteine-rich domain  
(SRCR, N=77)

Fisher's OR: 0.347; Bonferroni p-val: 1

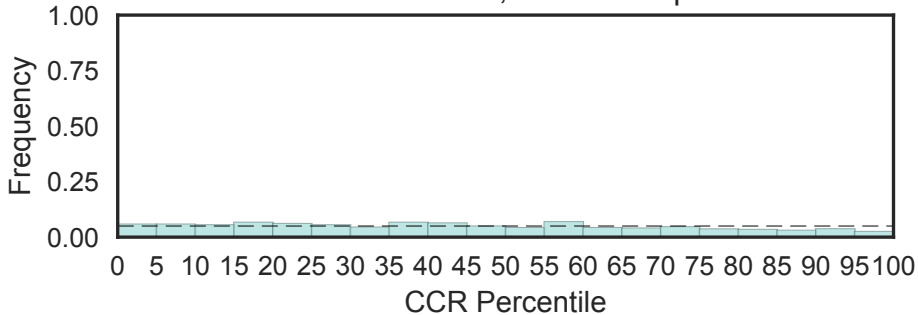

Scavenger receptor cysteine-rich domain  
(SRCR\_2, N=9)

Fisher's OR: 0; Bonferroni p-val: 1

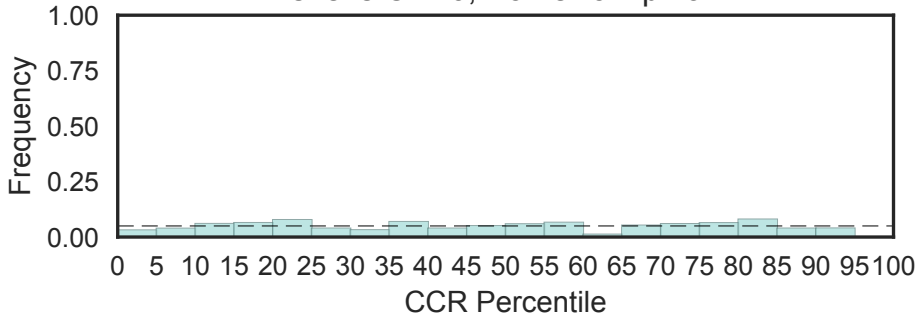

SRF-type transcription factor (DNA-binding and dimerisation domain)  
(SRF-TF, N=6)

Fisher's OR: 15.4; Bonferroni p-val: 0.0317

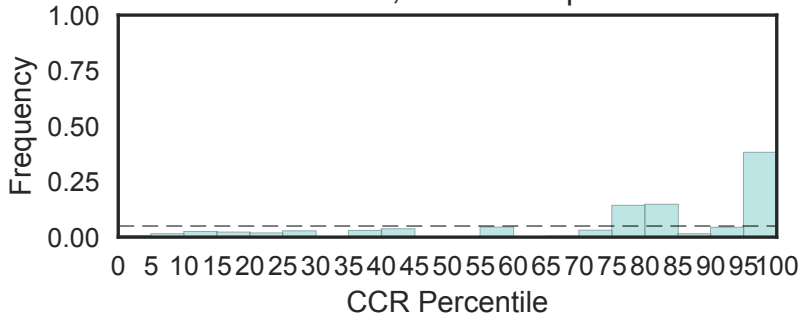



SRI (Set2 Rpb1 interacting) domain  
(SRI, N=1)

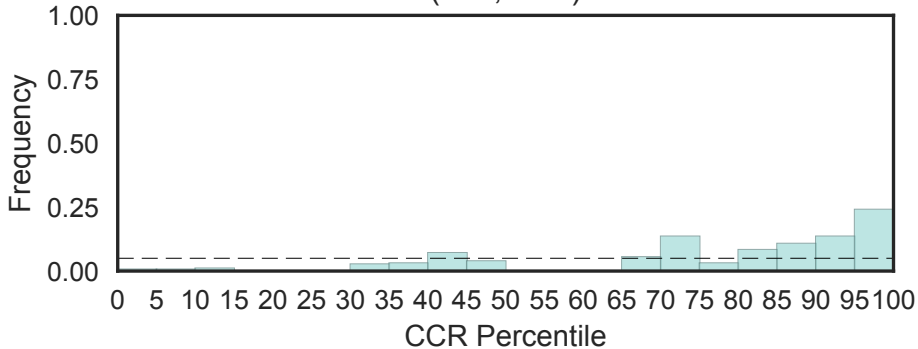

Signal recognition particle, alpha subunit, N-terminal  
(SRP-alpha\_N, N=1)

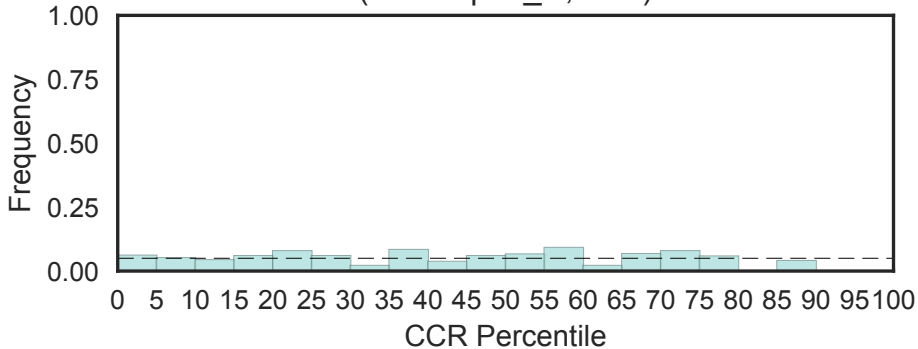

Signal recognition particle 14kD protein  
(SRP14, N=1)

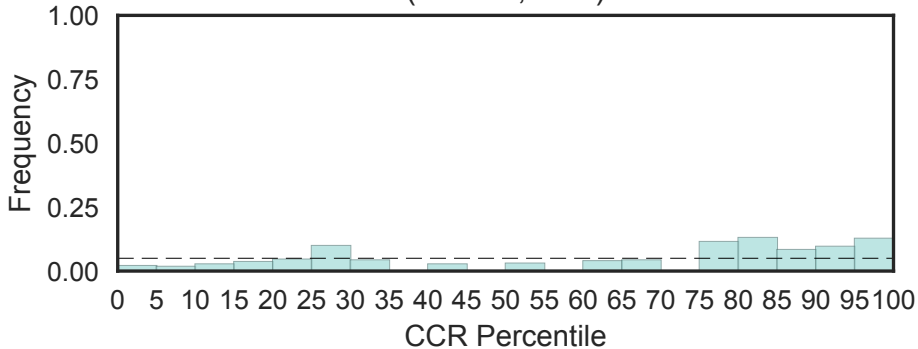

SRP19 protein  
(SRP19, N=1)

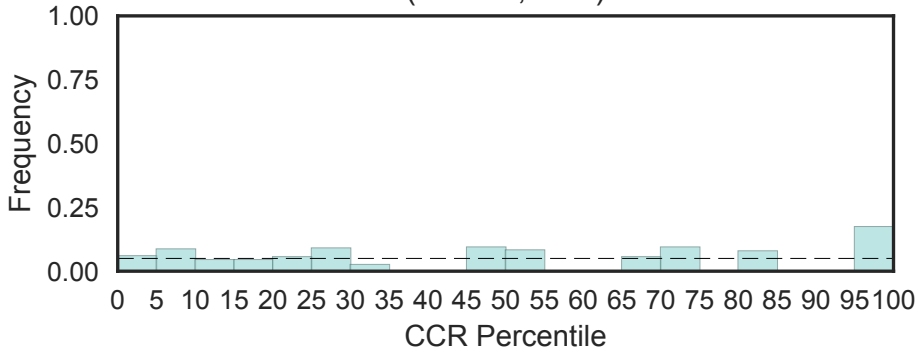

SRP40, C-terminal domain  
(SRP40\_C, N=1)

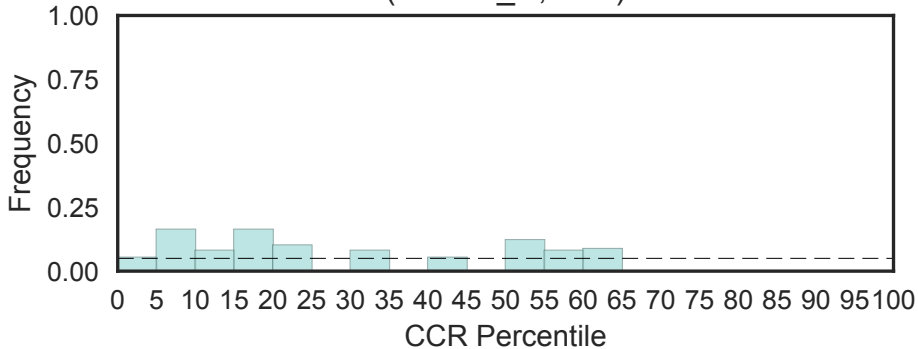

SRP54-type protein, GTPase domain  
(SRP54, N=2)

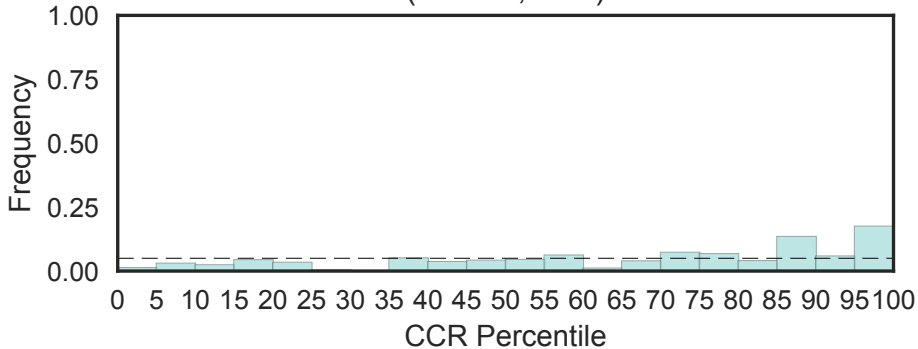

SRP54-type protein, helical bundle domain  
(SRP54\_N, N=2)

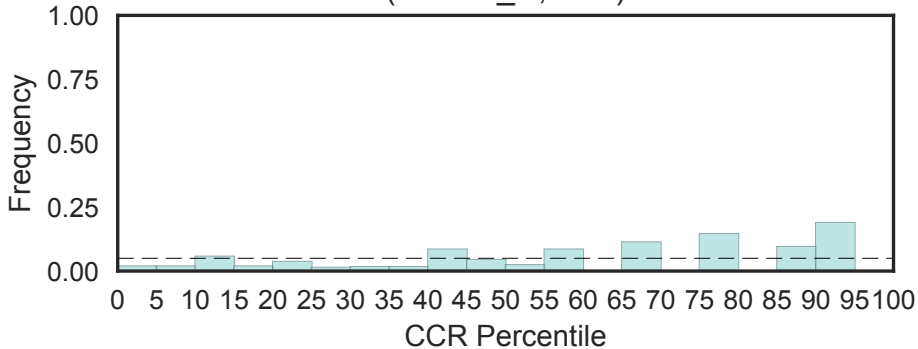

RNA-binding signal recognition particle 68  
(SRP68, N=1)

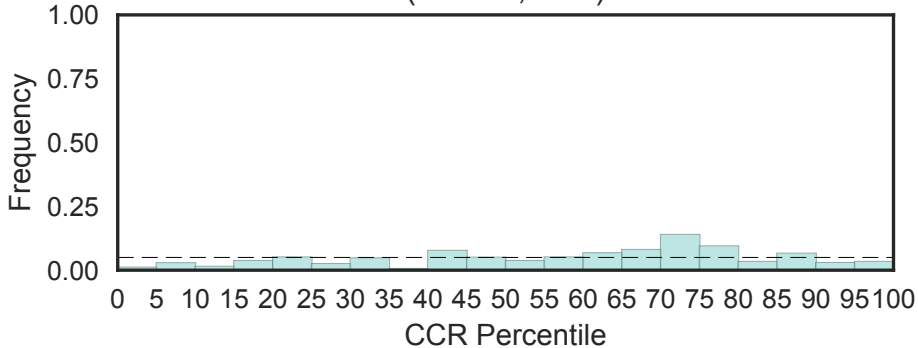



SRP72 RNA-binding domain  
(SRP72, N=1)

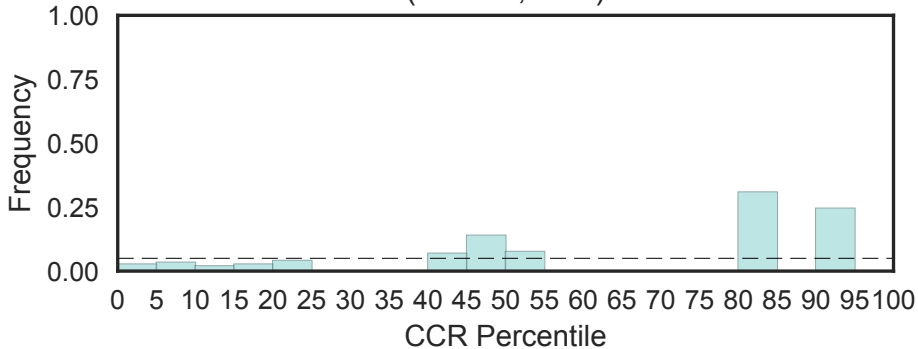

Signal recognition particle 9 kDa protein (SRP9)  
(SRP9-21, N=1)

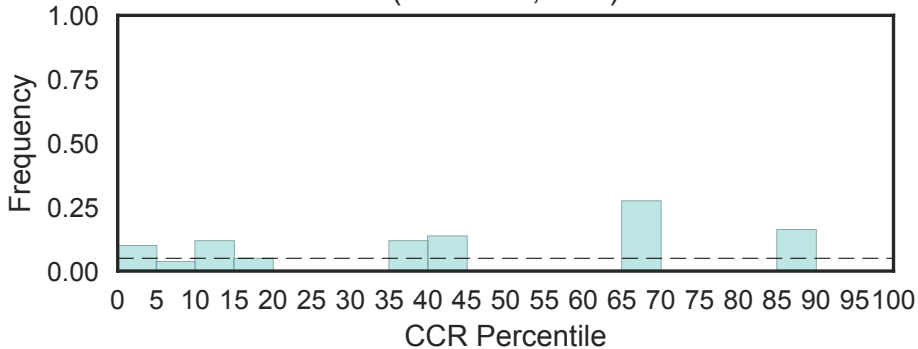

Signal recognition particle receptor beta subunit  
(SRPRB, N=48)

Fisher's OR: 4.08; Bonferroni p-val: 1.56e-12

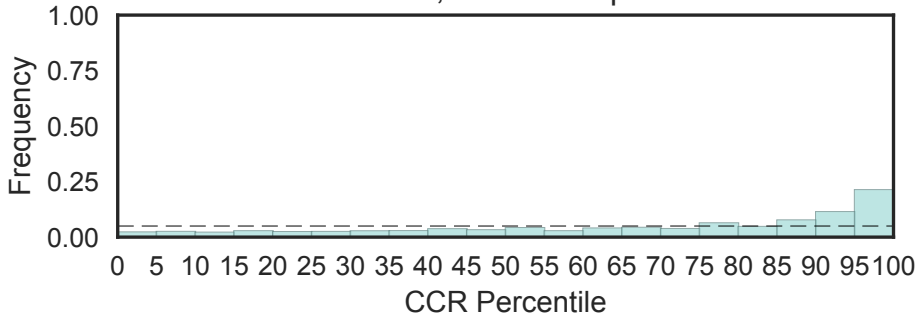

Signal peptide binding domain  
(SRP\_SPB, N=1)

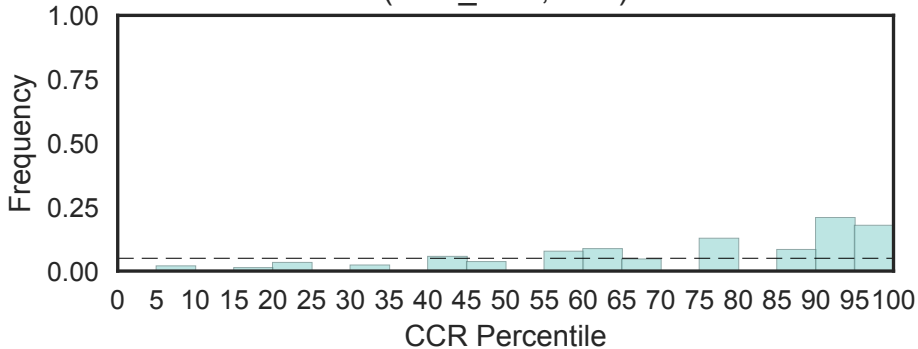

Putative TPR-like repeat  
(SRP\_TPR\_like, N=1)

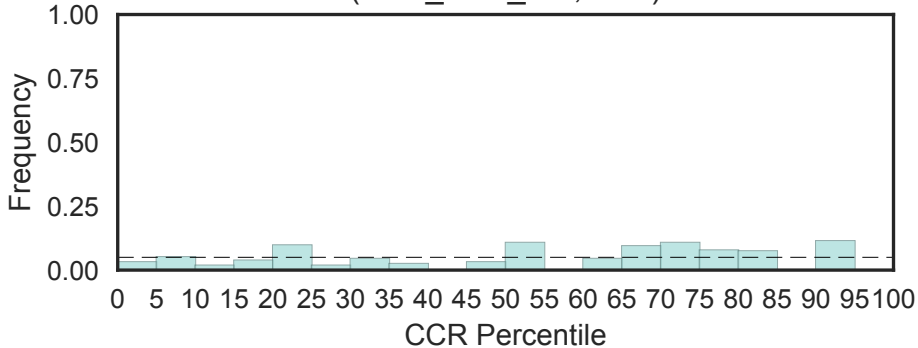

# SRR1 (SRR1, N=1)

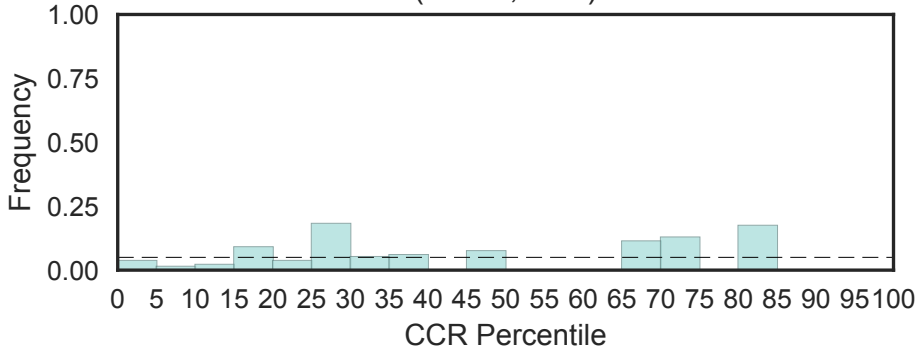

Serine/arginine repetitive matrix protein C-terminus  
(SRRM\_C, N=2)

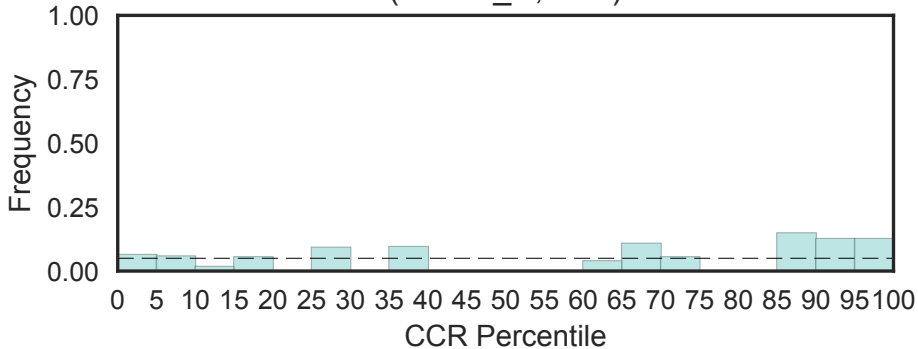

# Serine-rich and transmembrane domain-containing protein 1 (SRTM1, N=1)

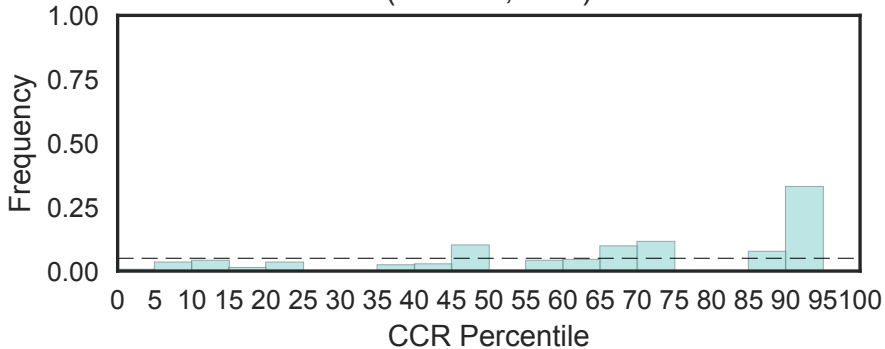



# Single-strand binding protein family (SSB, N=1)

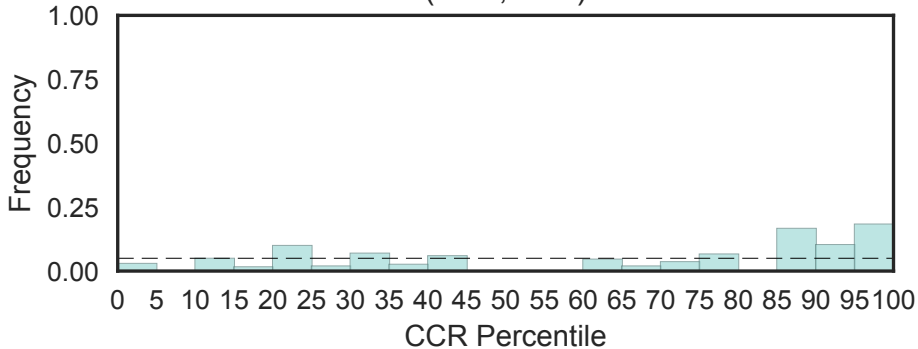

Single-stranded DNA binding protein, SSDP  
(SSDP, N=5)

Fisher's OR: 1.46; Bonferroni p-val: 1

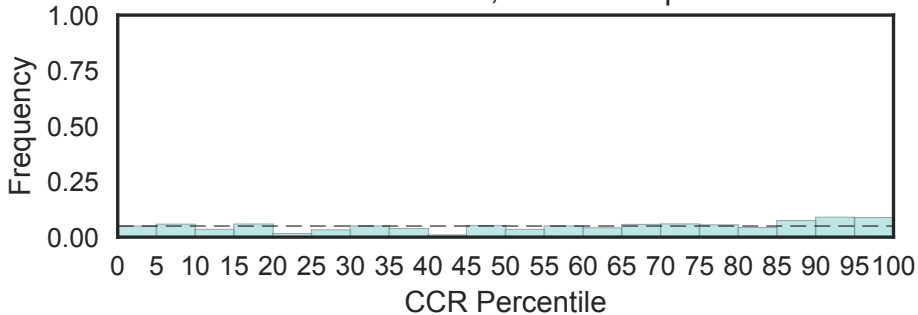

Sodium:solute symporter family  
(SSF, N=14)

Fisher's OR: 0.598; Bonferroni p-val: 1

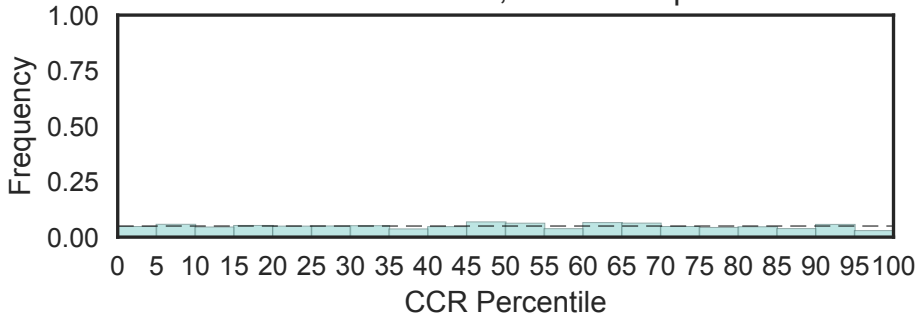

Sperm-specific antigen 2 C-terminus  
(SSFA2\_C, N=2)

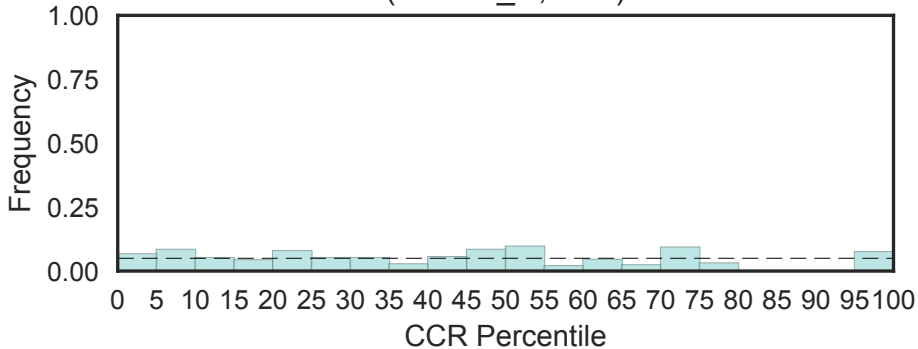

# SSTK-interacting protein, TSSK6-activating co-chaperone protein (SSTK-IP, N=1)

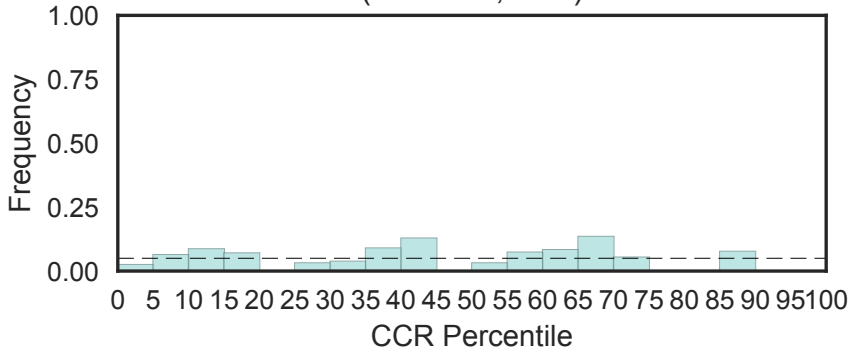

SSXT protein (N-terminal region)  
(SSXT, N=3)

Fisher's OR: 0; Bonferroni p-val: 1

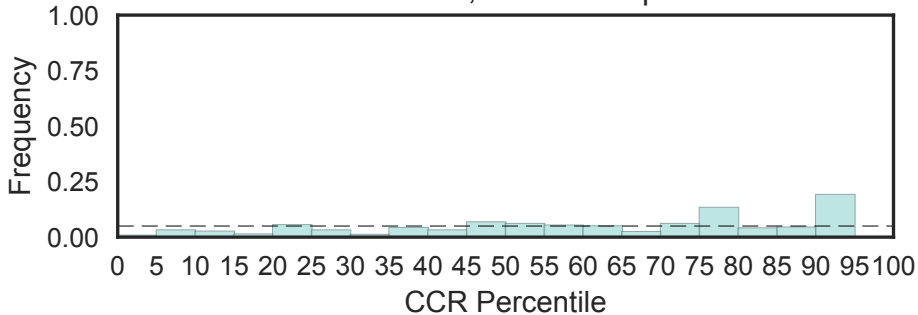

Structure-specific recognition protein (SSRP1)  
(SSrecog, N=1)

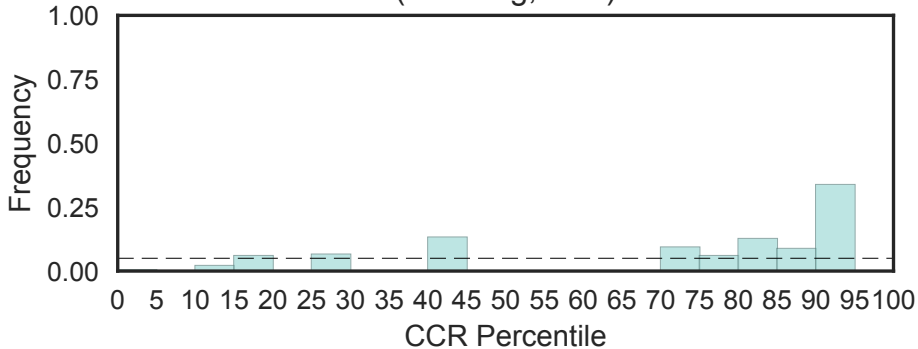

ST7 protein  
(ST7, N=5)

Fisher's OR: 2.59; Bonferroni p-val: 1

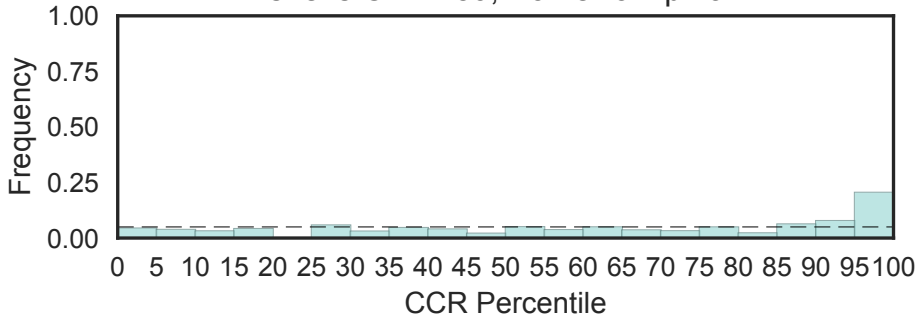



Unstructured on SH3 and cysteine-rich domain-containing protein 2  
(STAC2\_u1, N=3)

Fisher's OR: 0; Bonferroni p-val: 1

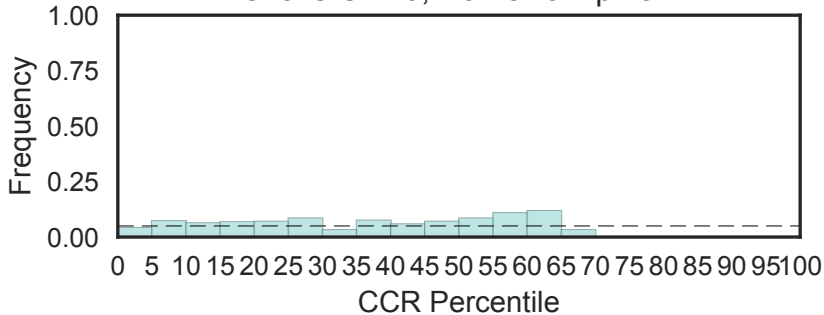

STAG domain  
(STAG, N=2)

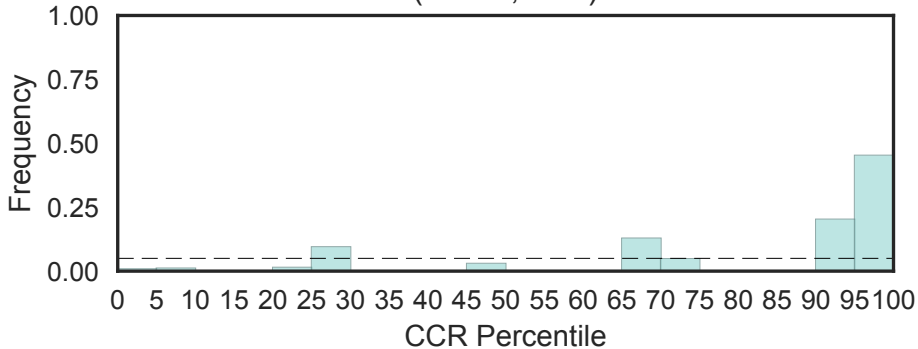

START domain  
(START, N=15)

Fisher's OR: 0.259; Bonferroni p-val: 1

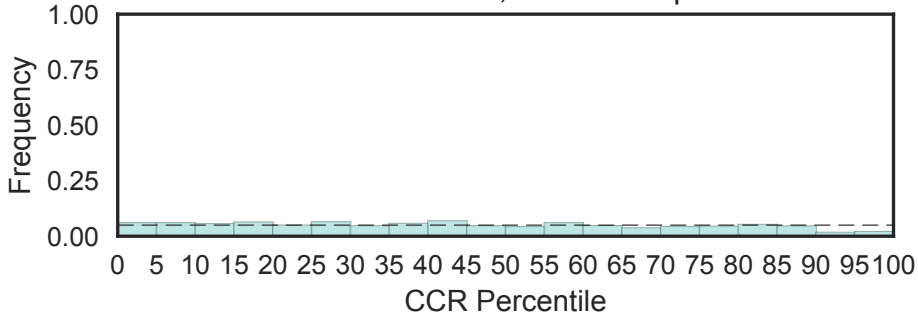

# Homodimerisation region of STAR domain protein (STAR\_dimer, N=1)

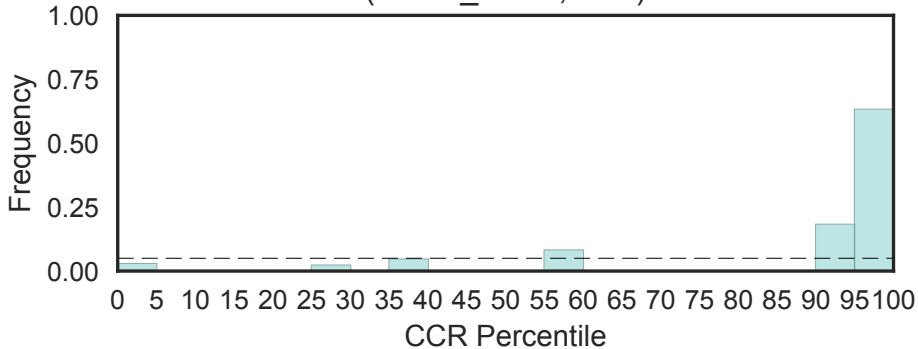

STAS domain  
(STAS, N=12)

Fisher's OR: 0.976; Bonferroni p-val: 1

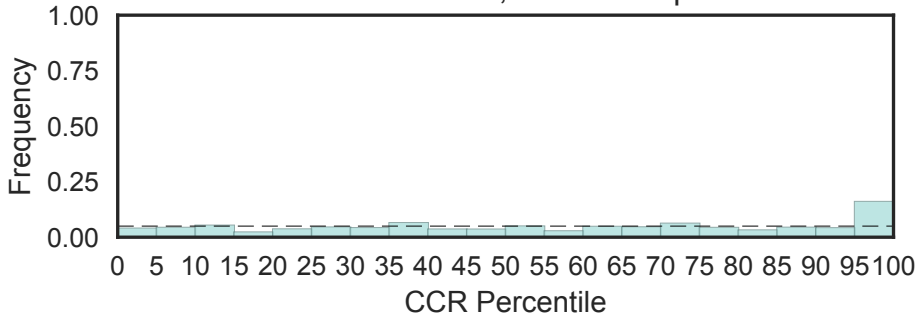

STAT1 TAZ2 binding domain  
(STAT1\_TAZ2bind, N=1)

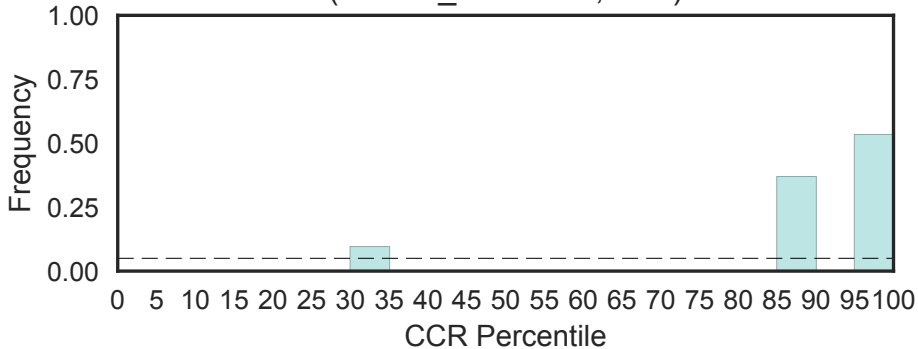

Signal transducer and activator of transcription 2 C terminal  
(STAT2\_C, N=1)

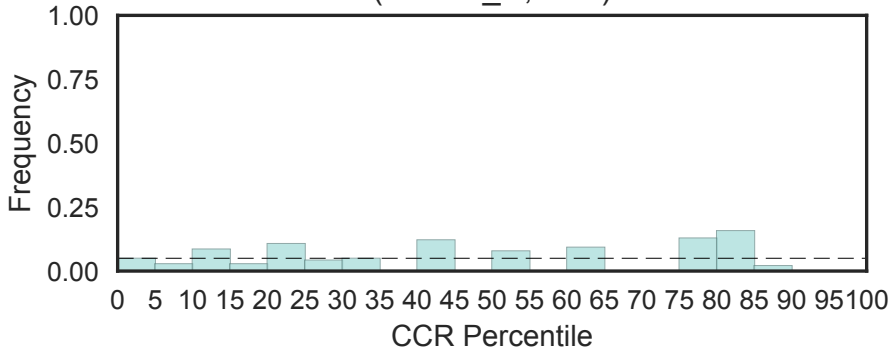

STAT6 C-terminal  
(STAT6\_C, N=1)

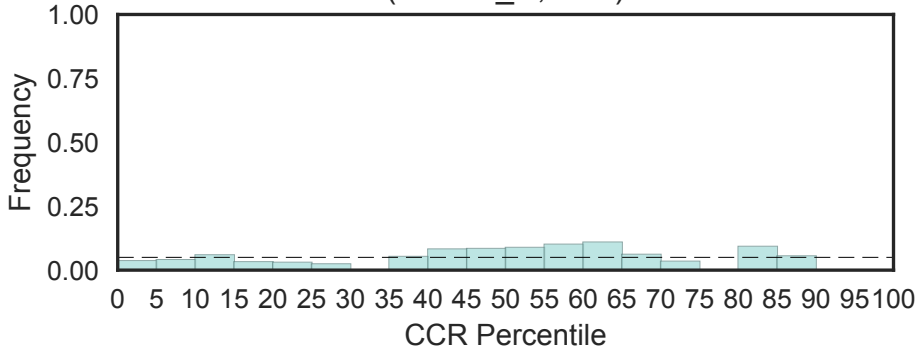



STAT protein, all-alpha domain  
(STAT\_alpha, N=7)

Fisher's OR: 7.29; Bonferroni p-val: 0.000494

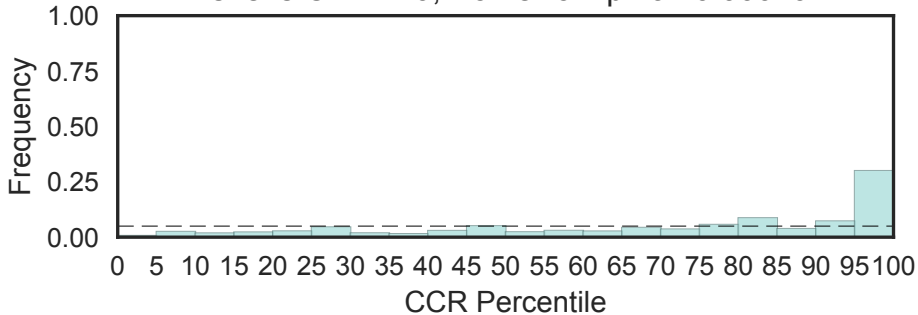

STAT protein, DNA binding domain  
(STAT\_bind, N=8)

Fisher's OR: 5.33; Bonferroni p-val: 0.000419

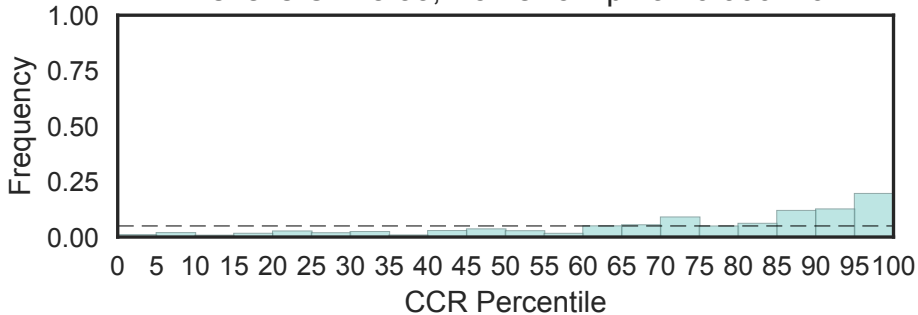

STAT protein, protein interaction domain  
(STAT\_int, N=7)

Fisher's OR: 6.8; Bonferroni p-val: 0.00912

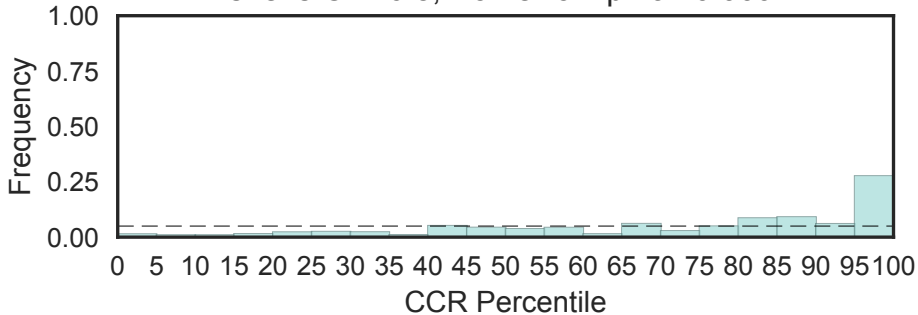

SCL-interrupting locus protein N-terminus  
(STIL\_N, N=1)

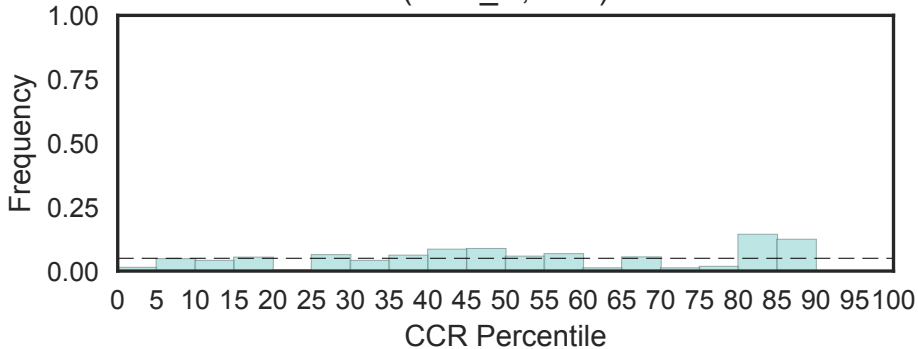

STIMATE family  
(STIMATE, N=2)

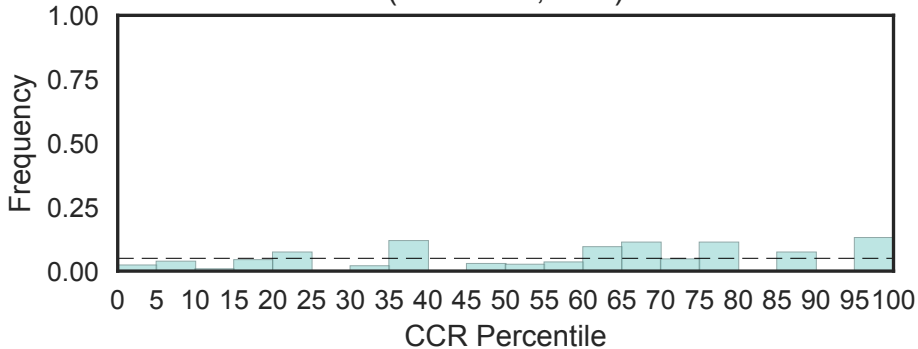

CST, Suppressor of cdc thirteen homolog, complex subunit STN1  
(STN1\_2, N=1)

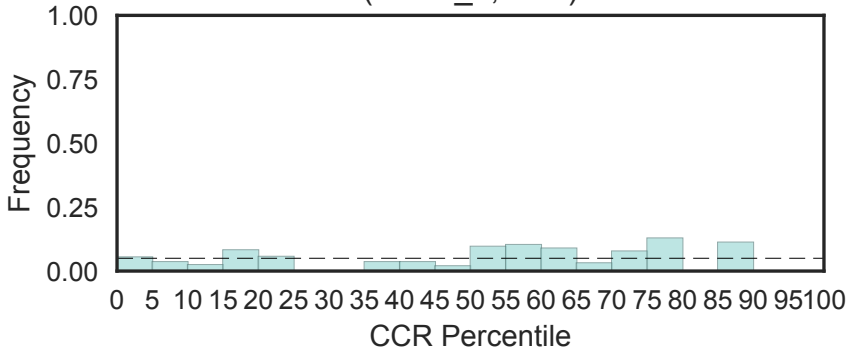

Serine-threonine protein phosphatase N-terminal domain  
(STPPase\_N, N=5)

Fisher's OR: 2.3; Bonferroni p-val: 1

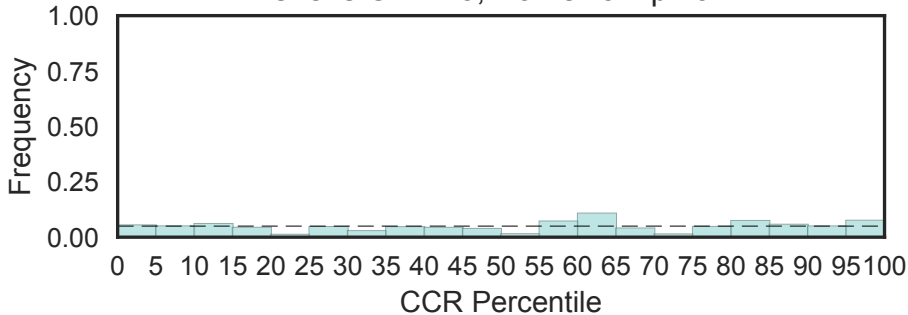

# Oligosaccharyl transferase STT3 subunit (STT3, N=2)

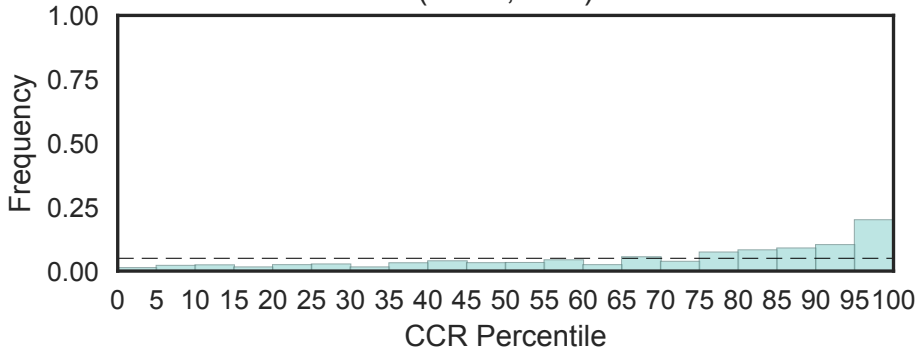



Suppressor of fused protein (SUFU)  
(SUFU, N=1)

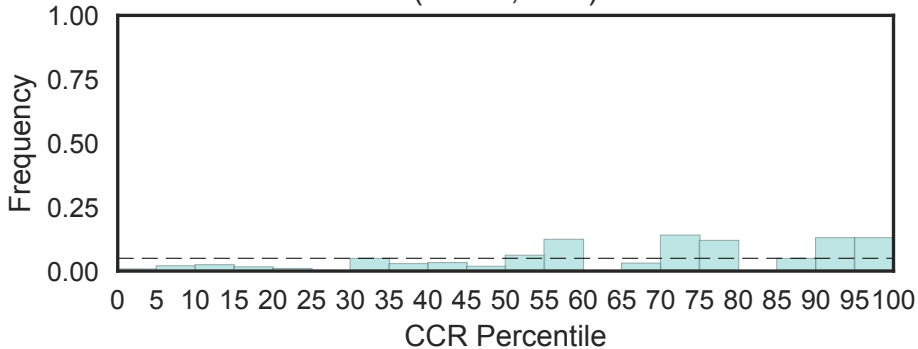

# Suppressor of Fused Gli/Ci N terminal binding domain (SUFU\_C, N=1)

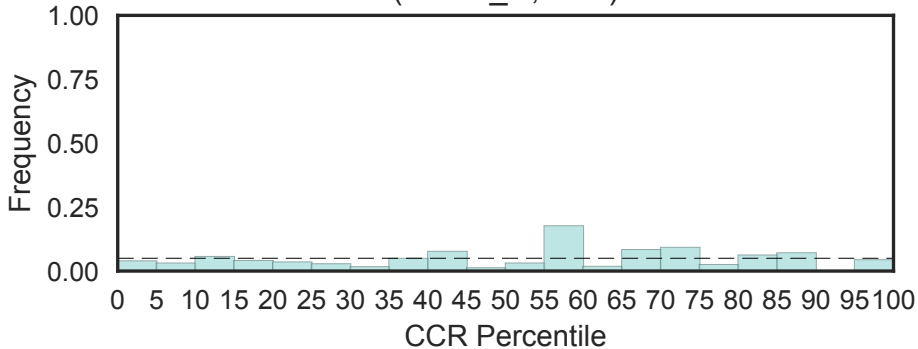

Translation initiation factor SUI1  
(SUI1, N=4)  
Fisher's OR: 7.72; Bonferroni p-val: 1

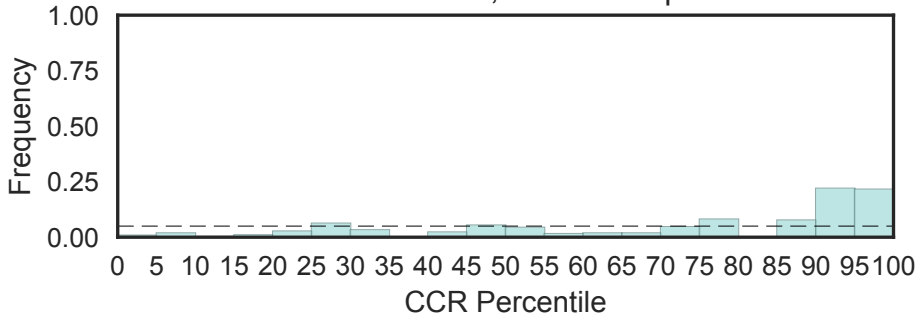

Unstructured region C-term to UIM in Ataxin3  
(SUIM\_assoc, N=1)

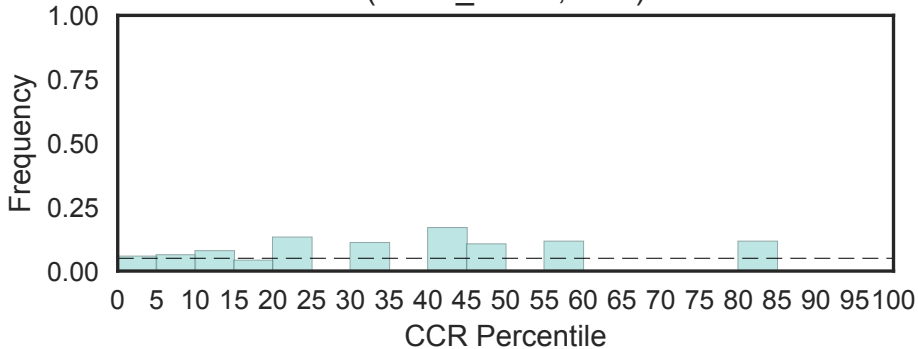

SURF1 family  
(SURF1, N=1)

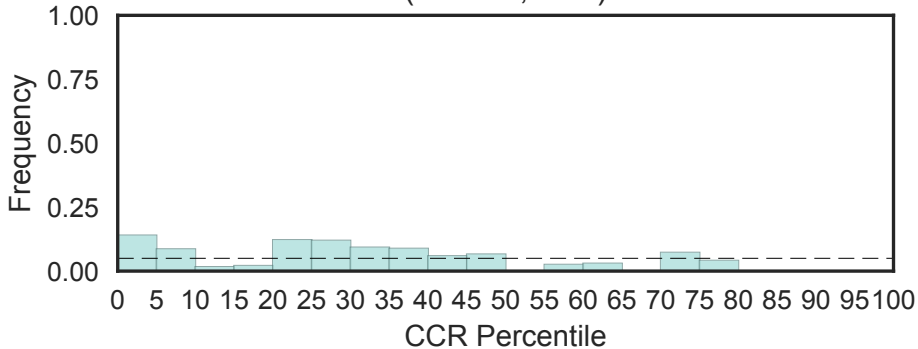

Surfeit locus protein 2 (SURF2)  
(SURF2, N=1)

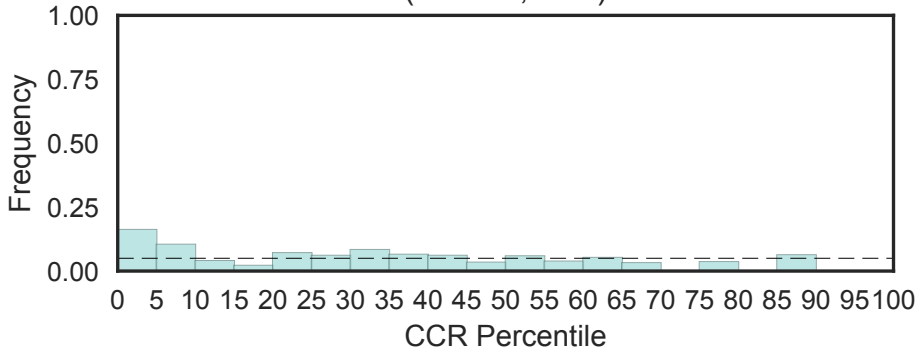

SURF4 family  
(SURF4, N=1)

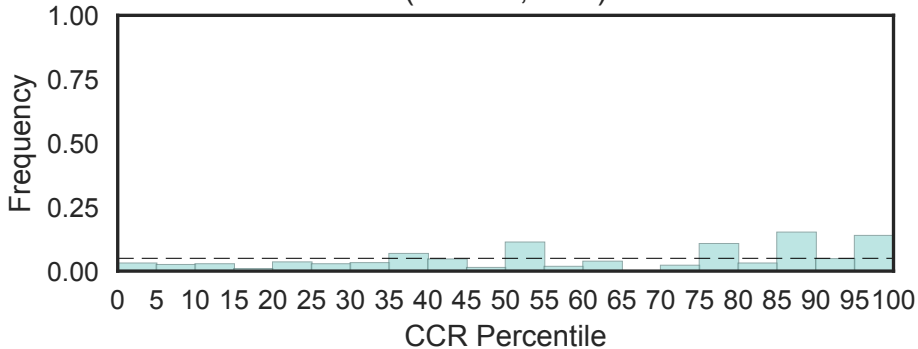

Surfeit locus protein 6  
(SURF6, N=1)

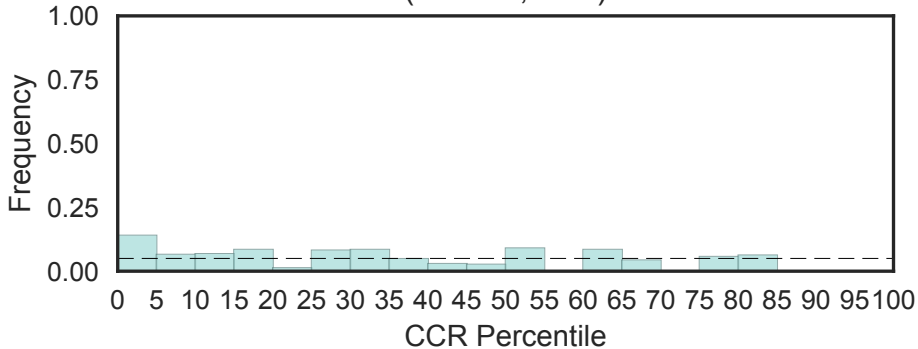



Mitochondrial degradasome RNA helicase subunit C terminal  
(SUV3\_C, N=1)

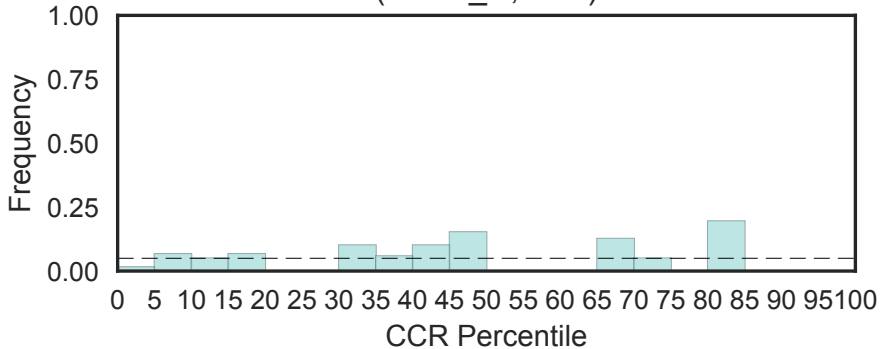

SUZ domain  
(SUZ, N=4)

Fisher's OR: 3.54; Bonferroni p-val: 1

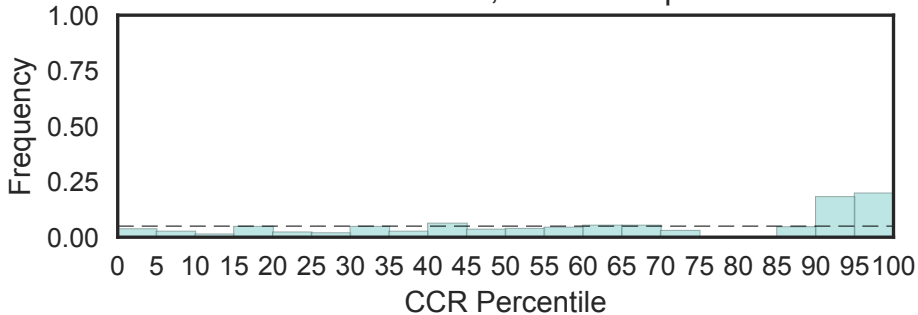

SUZ-C motif  
(SUZ-C, N=3)

Fisher's OR: 0; Bonferroni p-val: 1

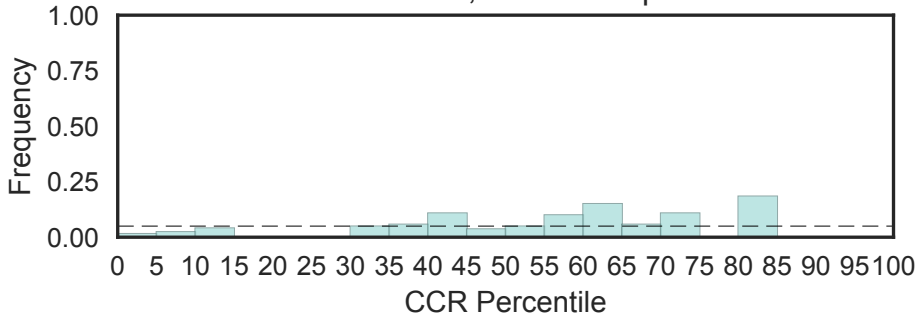

Seminal vesicle autoantigen (SVA)  
(SVA, N=3)

Fisher's OR: 0; Bonferroni p-val: 1

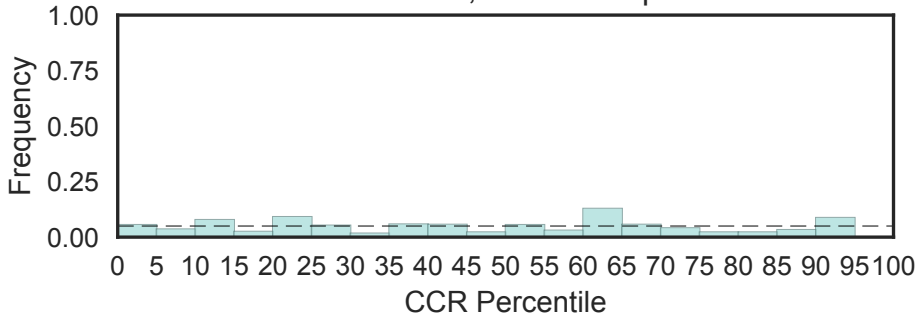

Small VCP/p97-interacting protein  
(SVIP, N=1)

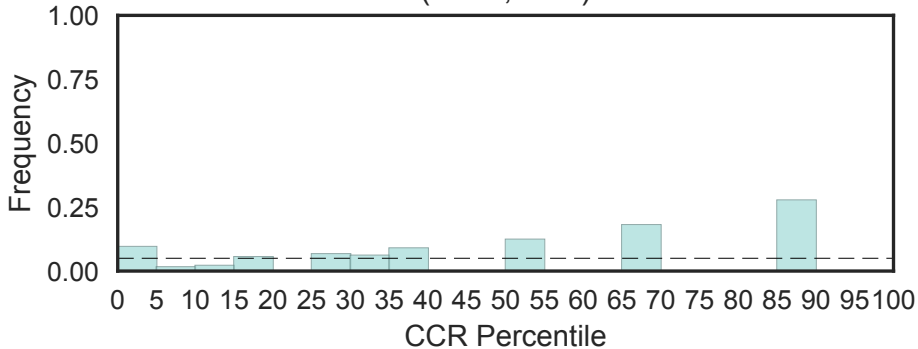

SWIB/MDM2 domain  
(SWIB, N=5)

Fisher's OR: 6.27; Bonferroni p-val: 1

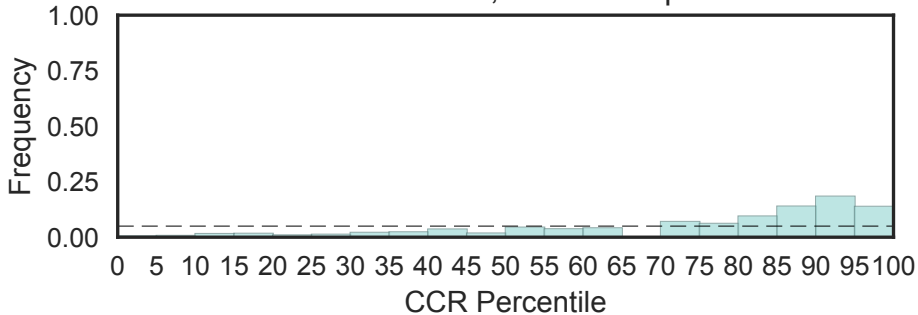

SWIM zinc finger  
(SWIM, N=8)

Fisher's OR: 2.7; Bonferroni p-val: 1

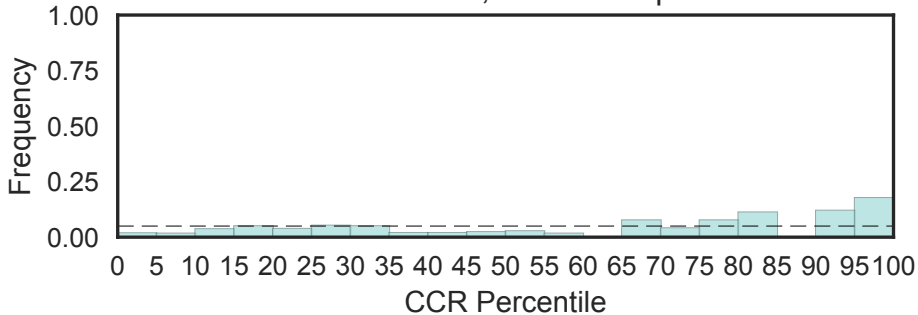

SWIRM domain  
(SWIRM, N=6)

Fisher's OR: 2.66; Bonferroni p-val: 1

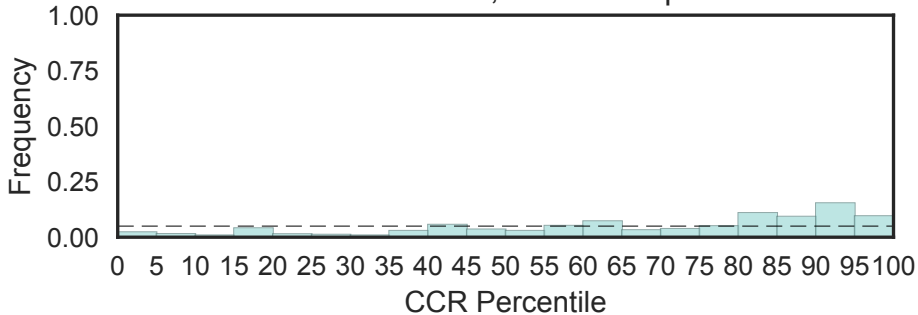



SWIRM-associated region 1  
(SWIRM-assoc\_1, N=2)

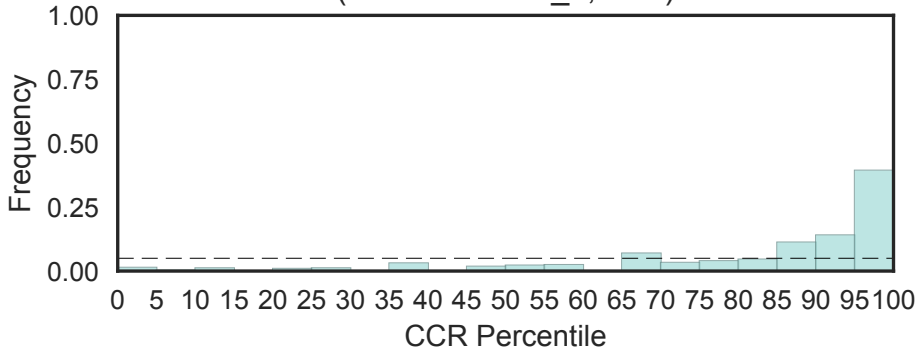

SWIRM-associated domain at the N-terminal  
(SWIRM-assoc\_2, N=2)

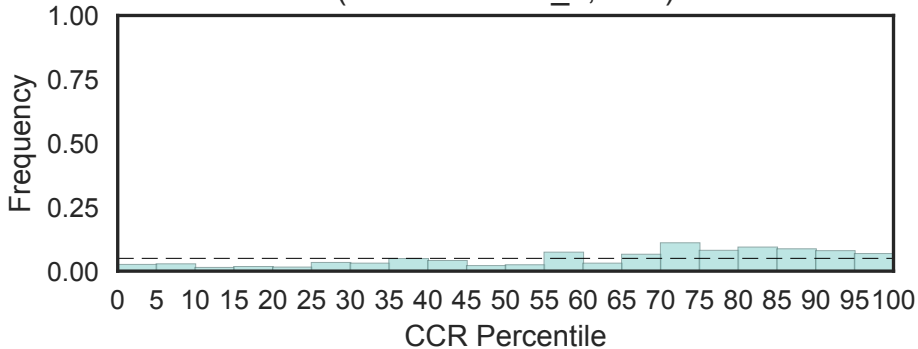

SWIRM-associated domain at the C-terminal  
(SWIRM-assoc\_3, N=2)

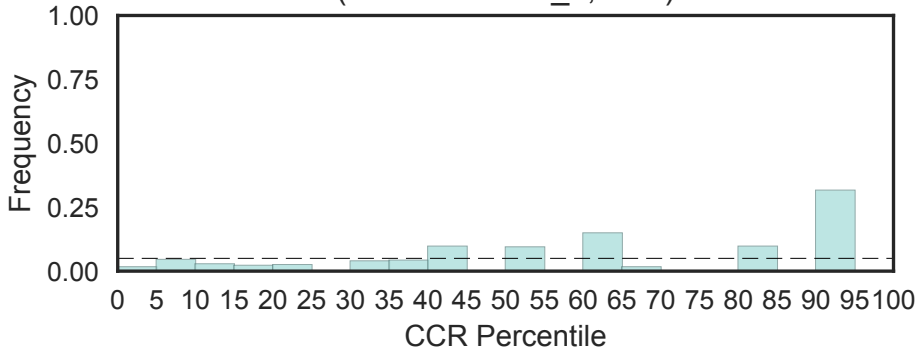

# Synaptonemal complex central element protein 1 (SYCE1, N=2)

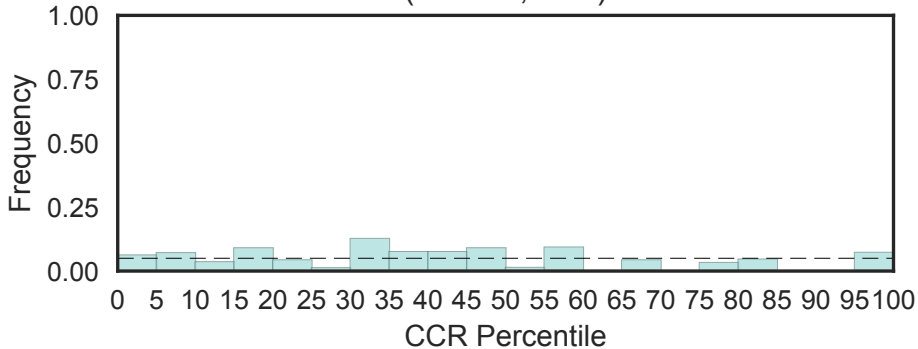

SYF2 splicing factor  
(SYF2, N=1)

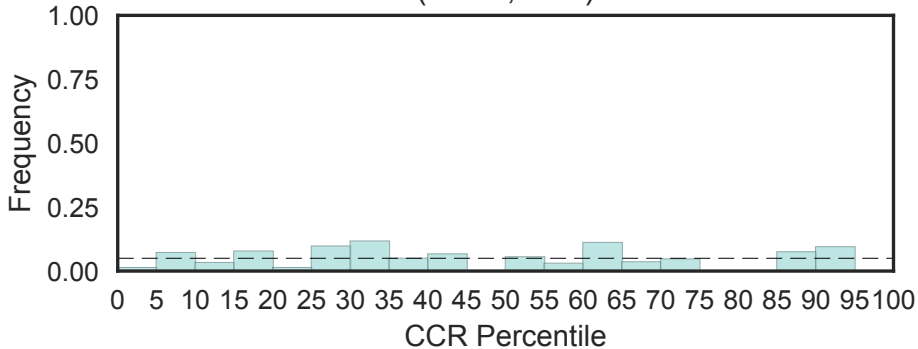

# Integral membrane protein S linking to the trans Golgi network (SYS1, N=1)

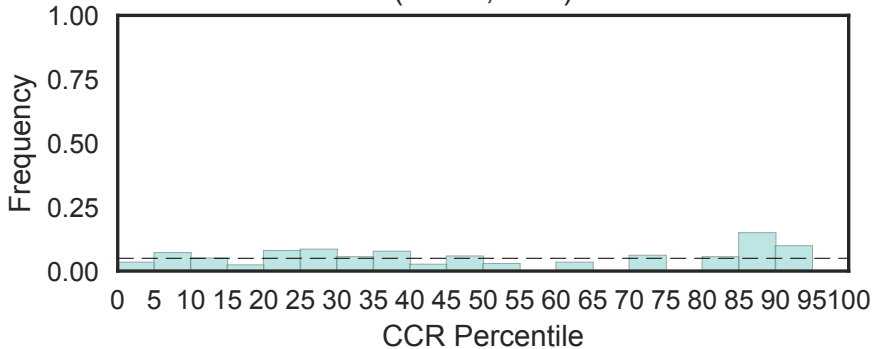

S-100/ICaBP type calcium binding domain  
(S\_100, N=27)

Fisher's OR: 0.246; Bonferroni p-val: 1

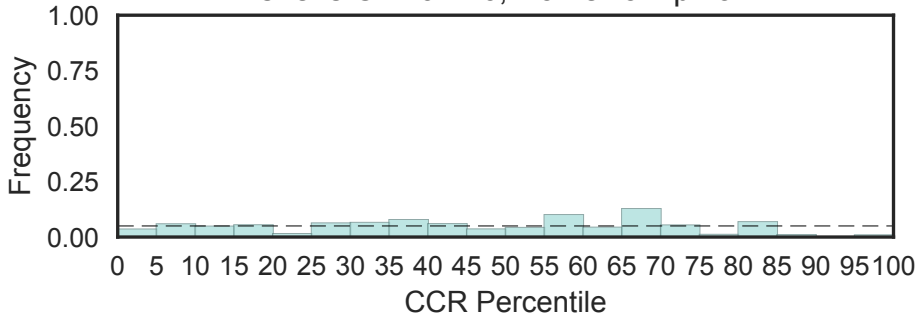

Saccharopine dehydrogenase C-terminal domain  
(Sacchrp\_dh\_C, N=1)

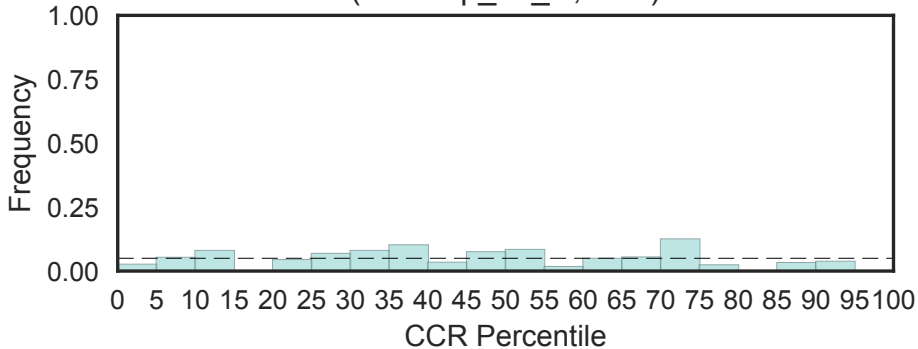



Saccharopine dehydrogenase NADP binding domain  
(Sacchrp\_dh\_NADP, N=2)

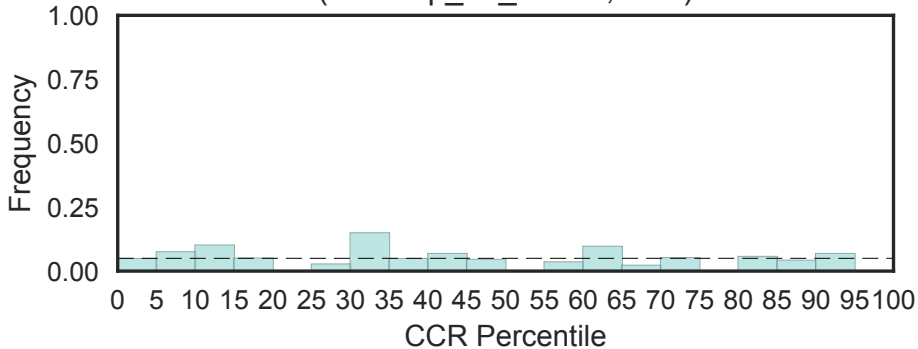

Sad1 / UNC-like C-terminal  
(Sad1 UNC, N=8)

Fisher's OR: 0.995; Bonferroni p-val: 1

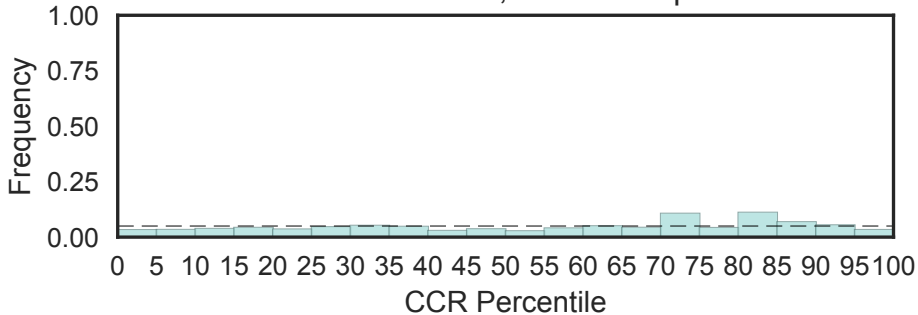

Tyrosine-rich domain of Sam68  
(Sam68-YY, N=3)  
Fisher's OR: 1.66; Bonferroni p-val: 1

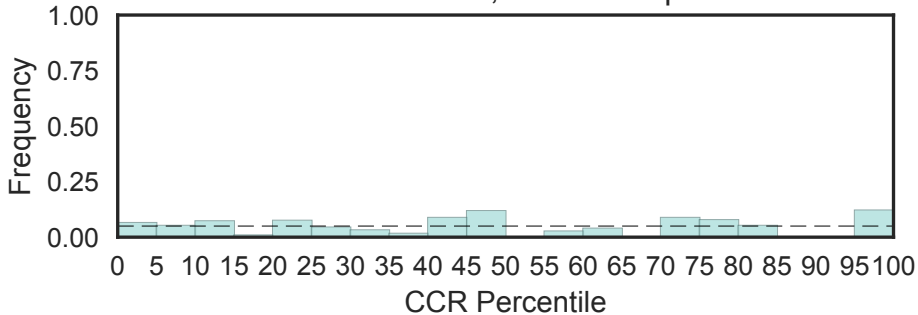

Saposin A-type domain  
(SapA, N=5)

Fisher's OR: 0; Bonferroni p-val: 1

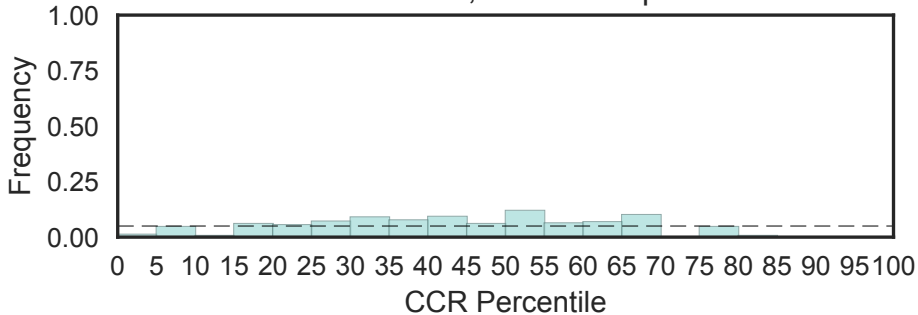

Saposin-like type B, region 1  
(SapB\_1, N=7)

Fisher's OR: 0; Bonferroni p-val: 1

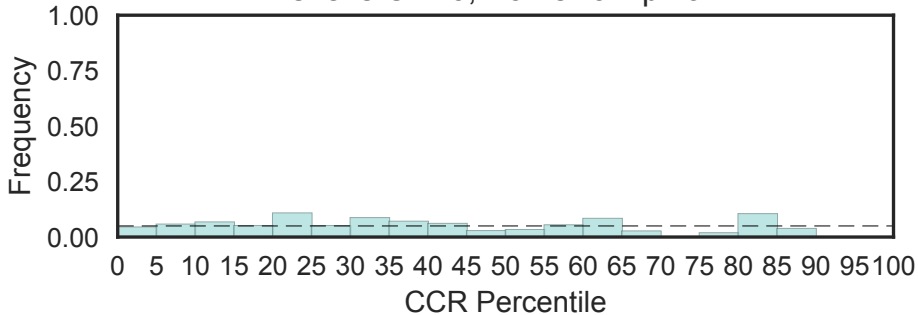

Saposin-like type B, region 2  
(SapB\_2, N=10)

Fisher's OR: 0; Bonferroni p-val: 1

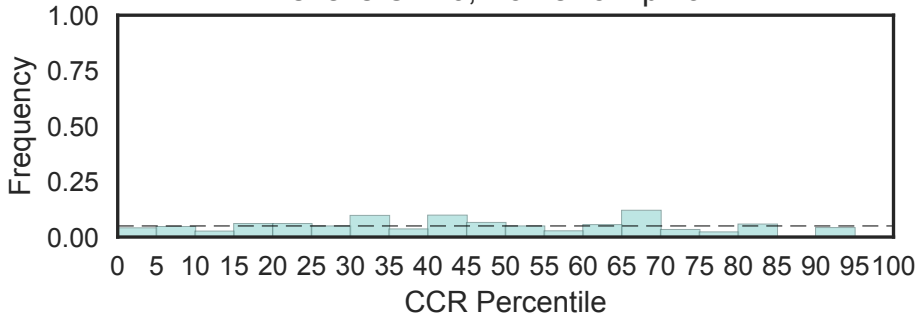

Sarcoglycan complex subunit protein  
(Sarcoglycan\_1, N=4)

Fisher's OR: 0.494; Bonferroni p-val: 1

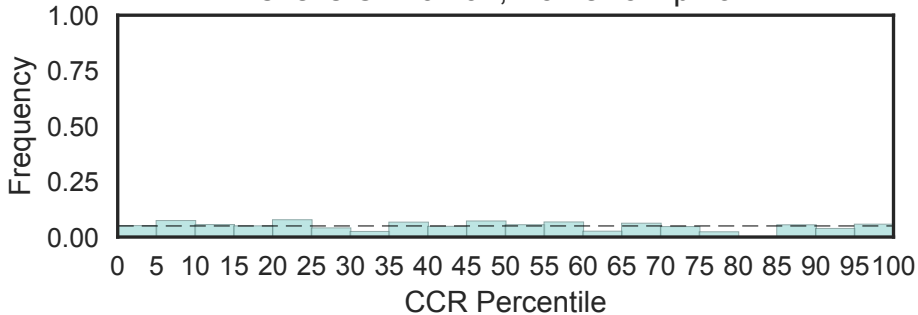

Sarcoglycan alpha/epsilon  
(Sarcoglycan\_2, N=2)

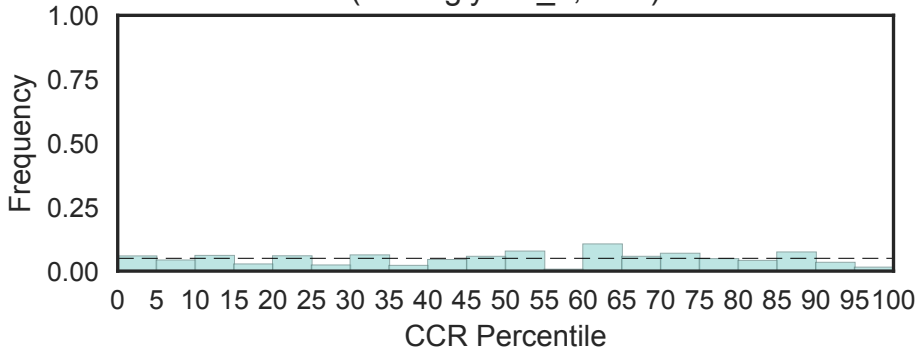



# Sarcolipin

(Sarcolipin, N=1)

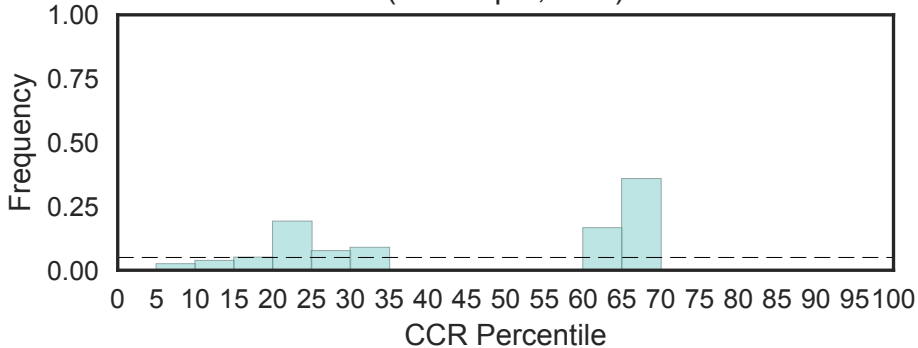

Sas10 C-terminal domain  
(Sas10, N=1)

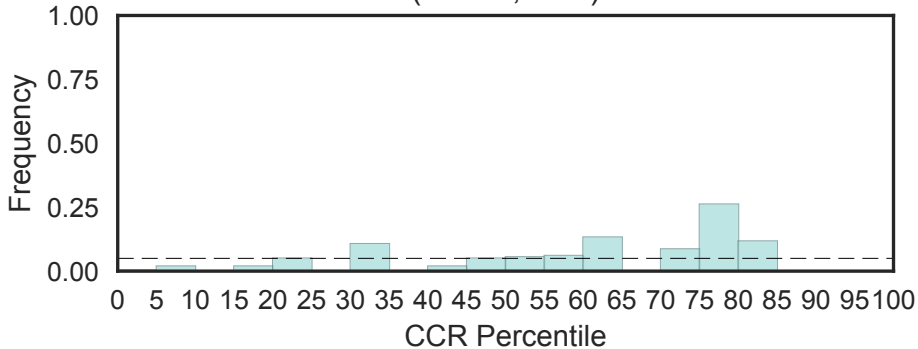

# Sas10/Utp3/C1D family

(Sas10\_Utp3, N=3)

Fisher's OR: 0; Bonferroni p-val: 1

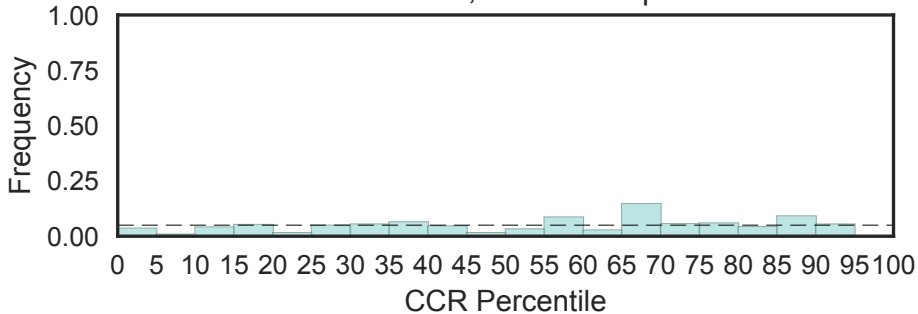

Steryl acetyl hydrolase  
(Say1\_Mug180, N=2)

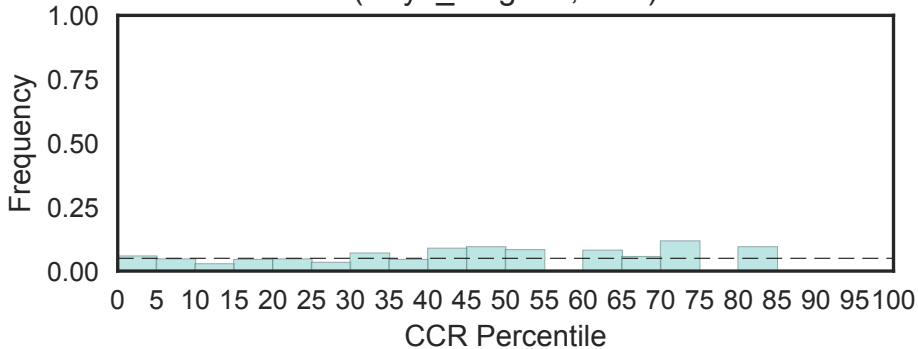

Putative exonuclease SbcCD, C subunit  
(SbcCD\_C, N=1)

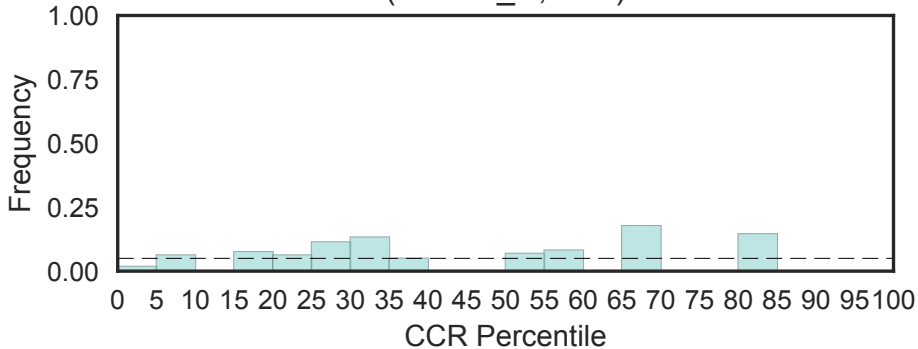

# Sclerostin (SOST) (Sclerostin, N=2)

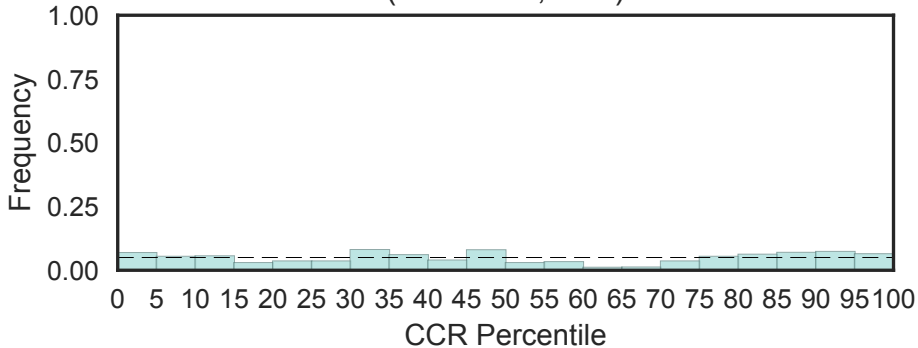

Centromere protein Scm3  
(Scm3, N=1)

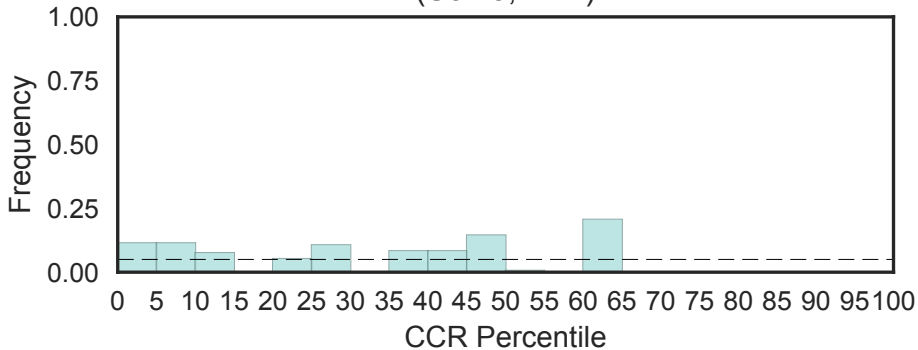

# Scramblase

(Scramblase, N=5)

Fisher's OR: 0.448; Bonferroni p-val: 1

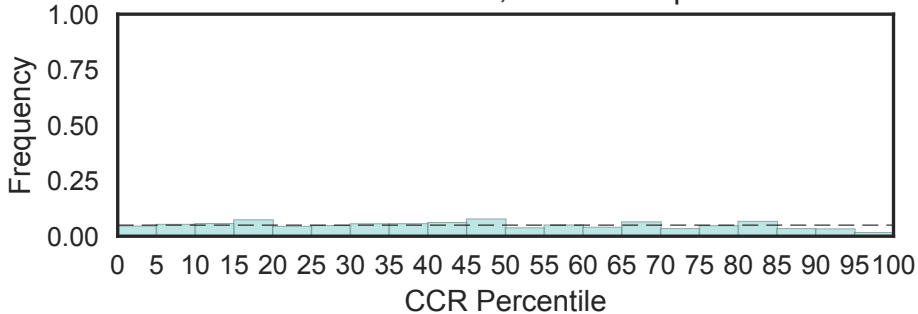



# Inositol phospholipid synthesis and fat-storage-inducing TM (Scs3p, N=1)

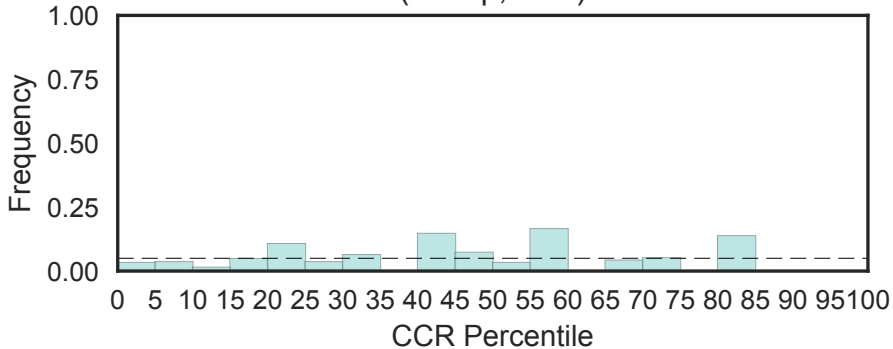

Flavinator of succinate dehydrogenase  
(Sdh5, N=2)

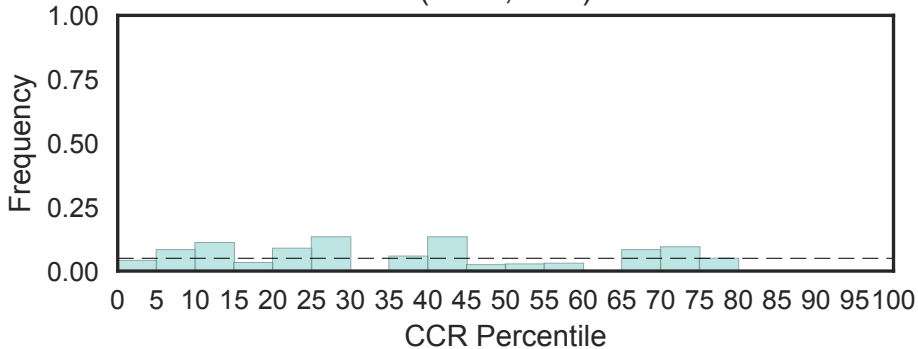

# Succinate dehydrogenase/Fumarate reductase transmembrane subunit (Sdh\_cyt, N=1)

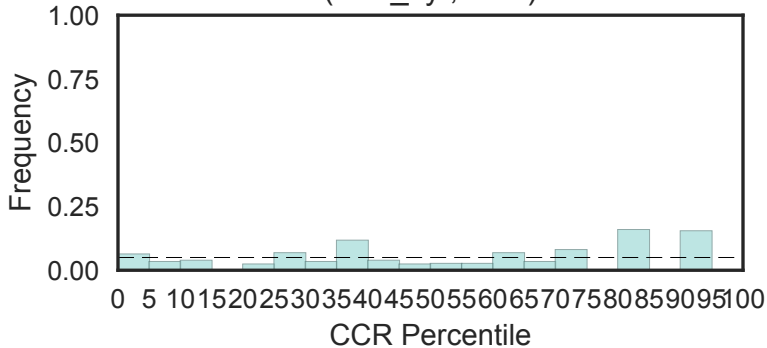

Sds3-like  
(Sds3, N=3)

Fisher's OR: 1.91; Bonferroni p-val: 1

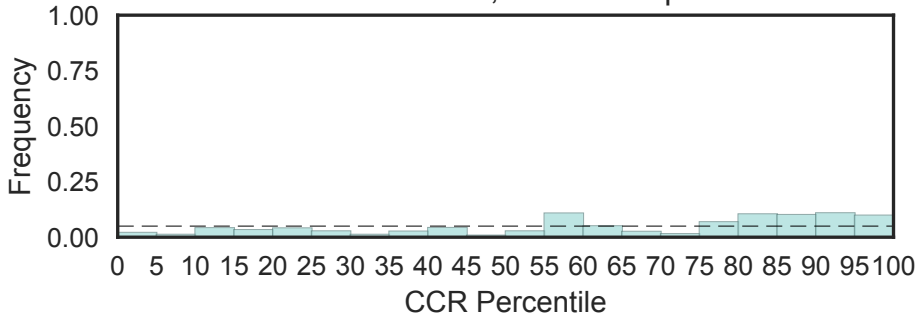

Sec1 family  
(Sec1, N=8)

Fisher's OR: 1.2; Bonferroni p-val: 1

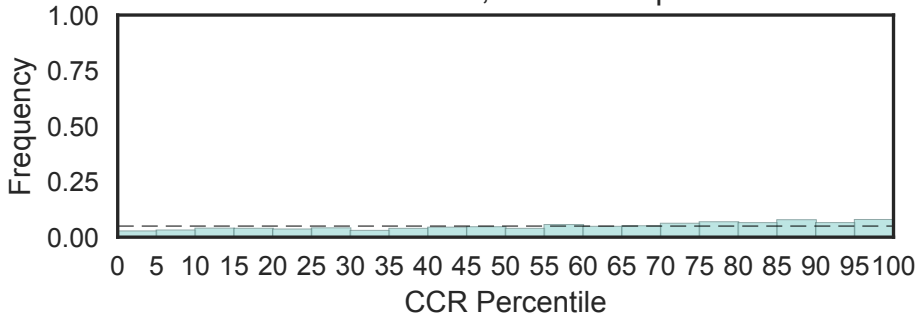

# Exocyst complex component Sec10 (Sec10, N=1)

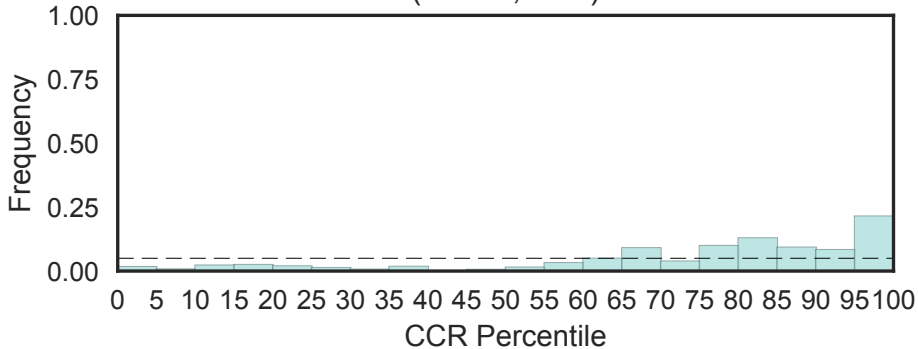

Exocyst complex subunit Sec15-like  
(Sec15, N=2)

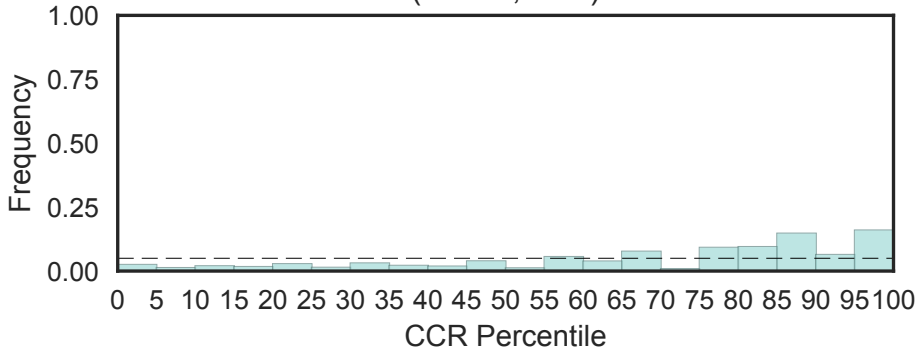

Vesicle coat trafficking protein Sec16 mid-region  
(Sec16, N=2)

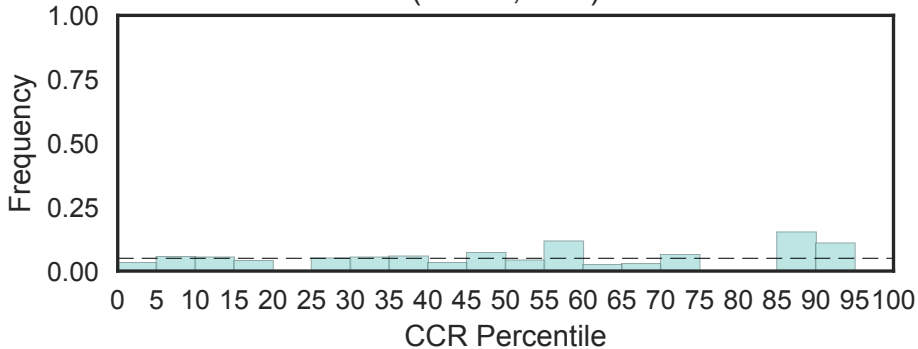



Sec23-binding domain of Sec16  
(Sec16\_C, N=3)  
Fisher's OR: 1.16; Bonferroni p-val: 1

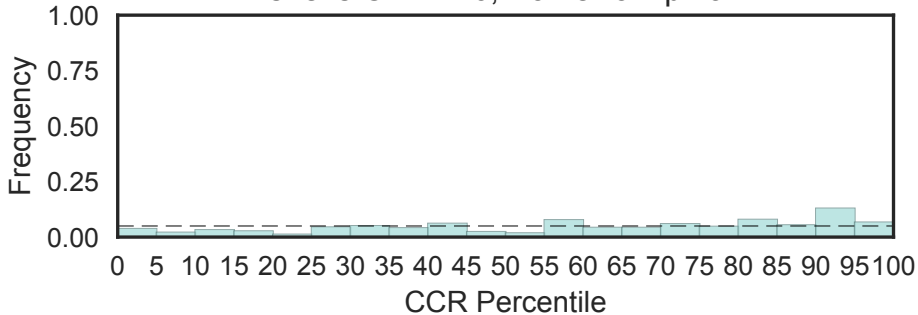

Sec20  
(Sec20, N=1)

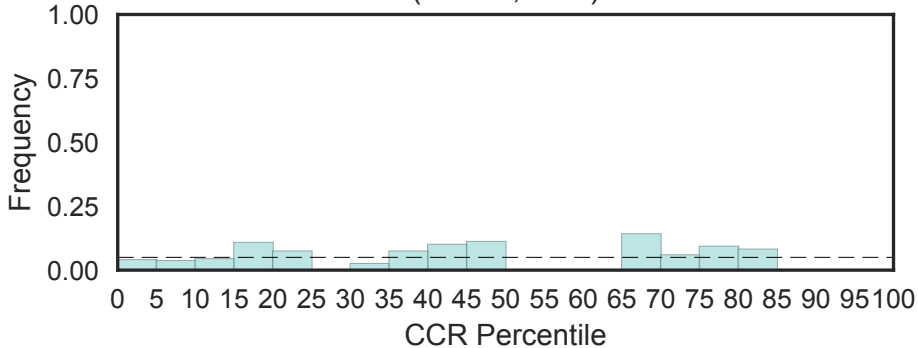

Sec23/Sec24 beta-sandwich domain  
(Sec23\_BS, N=6)

Fisher's OR: 0.491; Bonferroni p-val: 1

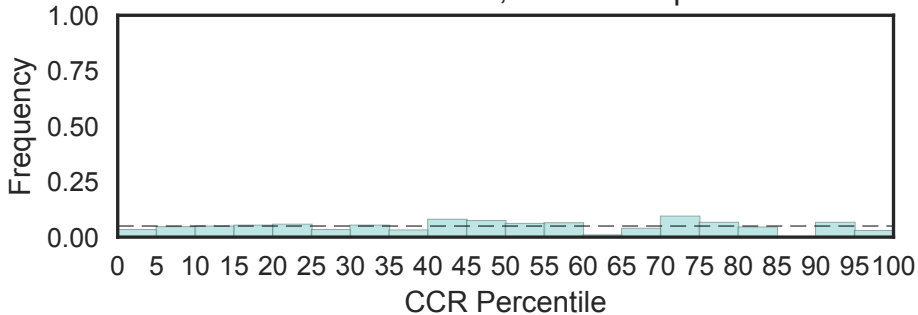

Sec23/Sec24 helical domain  
(Sec23\_helical, N=6)

Fisher's OR: 0; Bonferroni p-val: 1

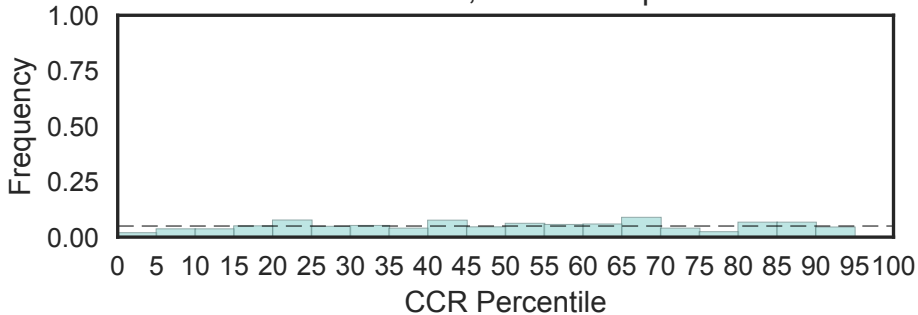

Sec23/Sec24 trunk domain  
(Sec23\_trunk, N=6)

Fisher's OR: 0.824; Bonferroni p-val: 1

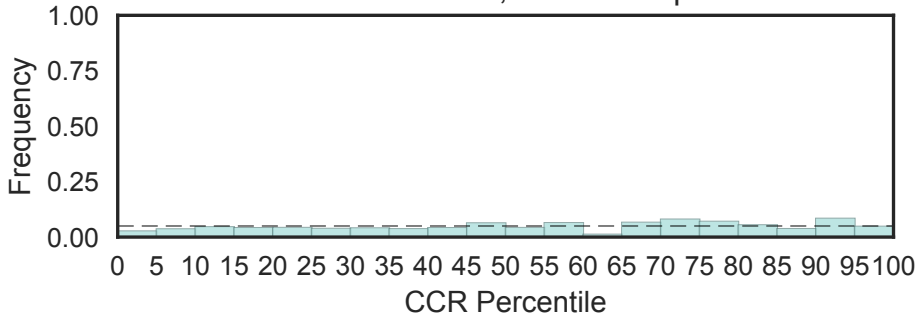

# GDP/GTP exchange factor Sec2p (Sec2p, N=2)

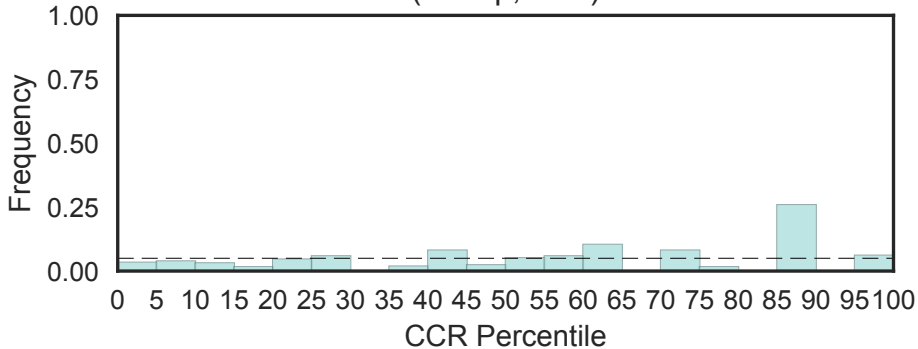

Exocyst complex component SEC3 N-terminal PIP2 binding PH  
(Sec3-PIP2\_bind, N=2)

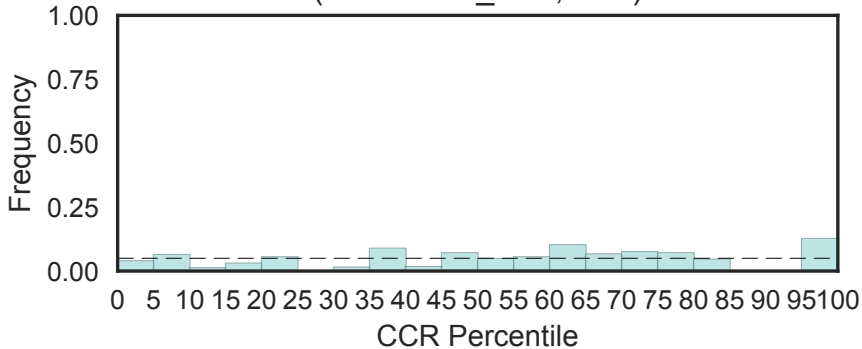

Sec34-like family  
(Sec34, N=1)

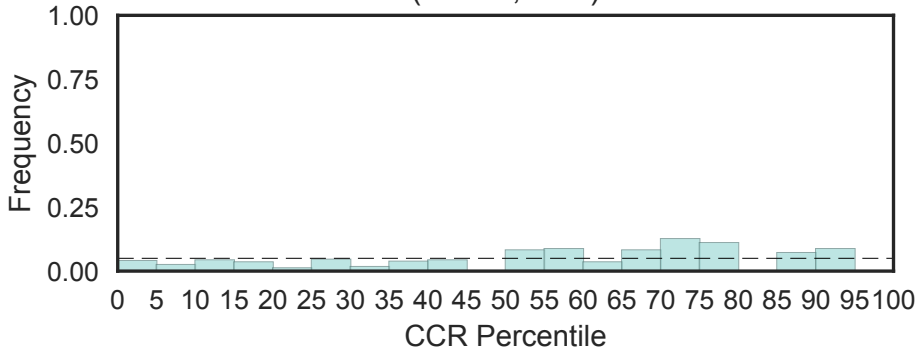



# Secretory pathway protein Sec39 (Sec39, N=1)

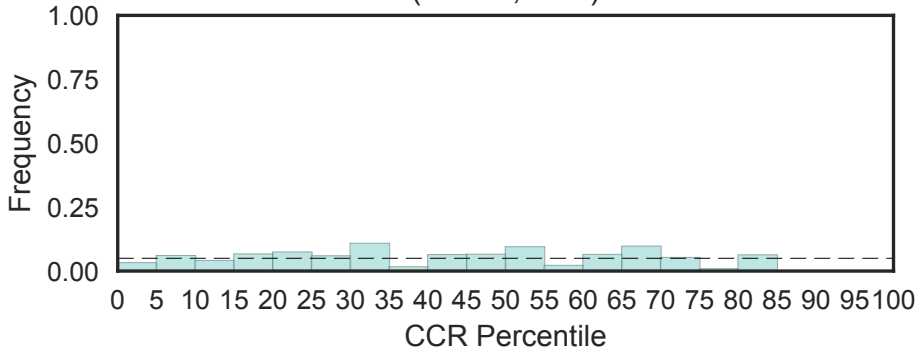

Exocyst complex component Sec3  
(Sec3\_C, N=2)

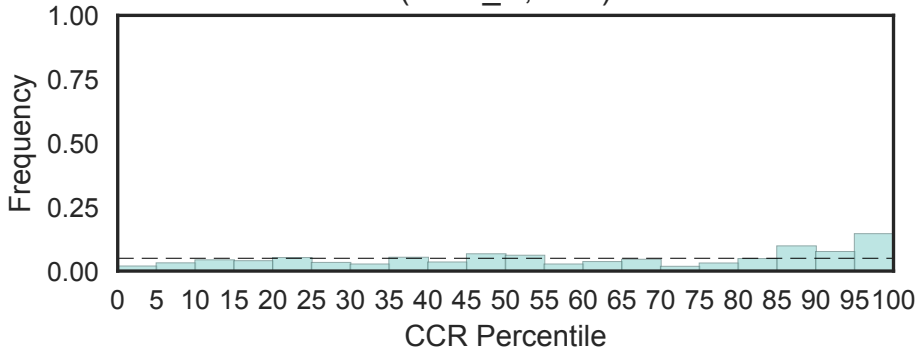

# Exocyst complex component Sec5 (Sec5, N=2)

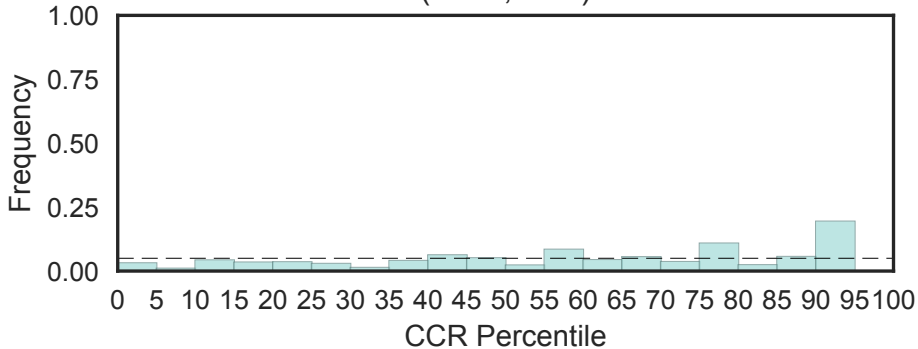

Exocyst complex component Sec6  
(Sec6, N=7)

Fisher's OR: 1; Bonferroni p-val: 1

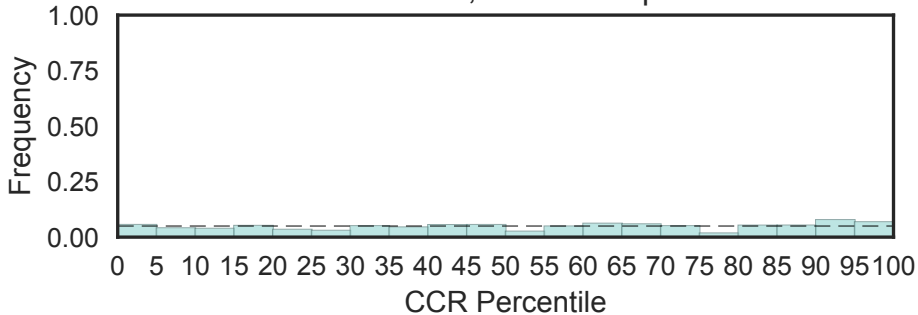

Sec61beta family  
(Sec61\_beta, N=1)

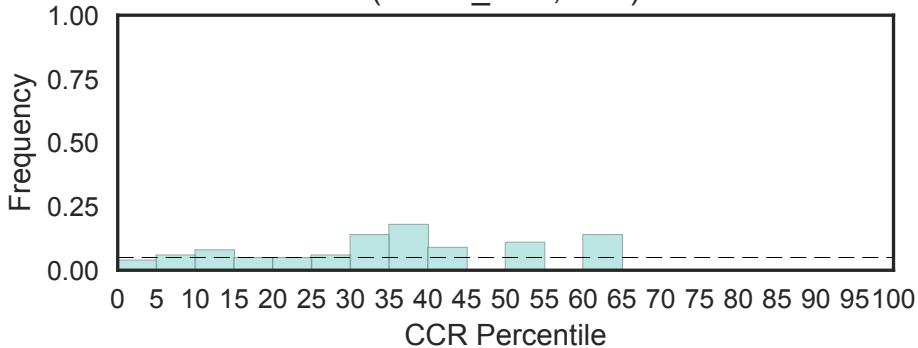

Translocation protein Sec62  
(Sec62, N=1)

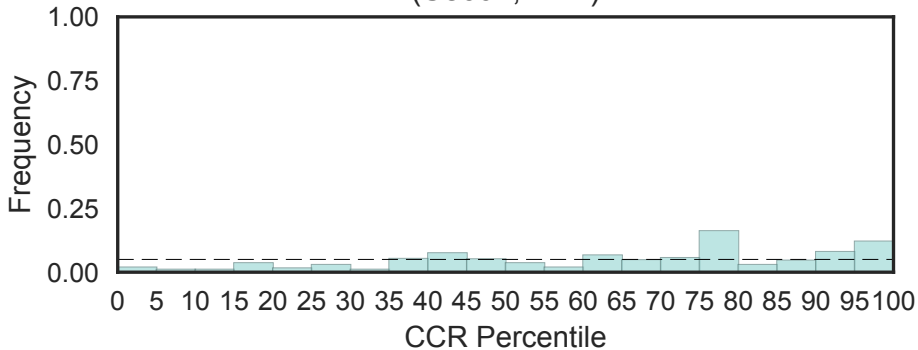

Sec63 Brl domain  
(Sec63, N=7)

Fisher's OR: 1.08; Bonferroni p-val: 1

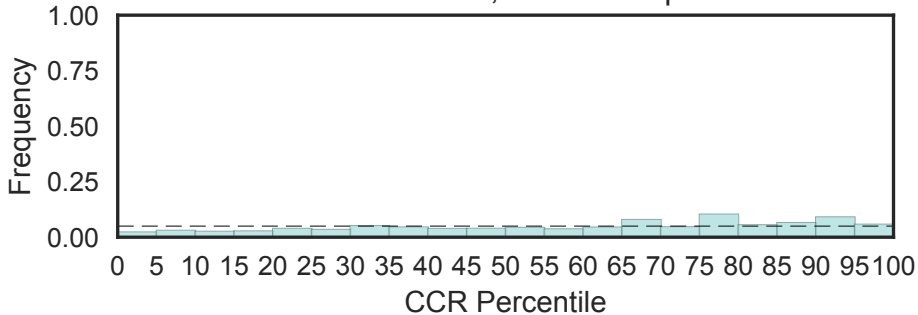

Sec7 domain  
(Sec7, N=15)

Fisher's OR: 2.4; Bonferroni p-val: 1

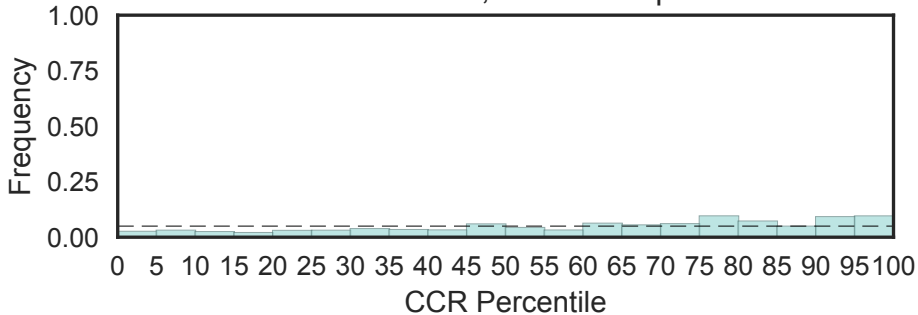



# Guanine nucleotide exchange factor in Golgi transport N-terminal (Sec7\_N, N=4)

Fisher's OR: 5; Bonferroni p-val: 1

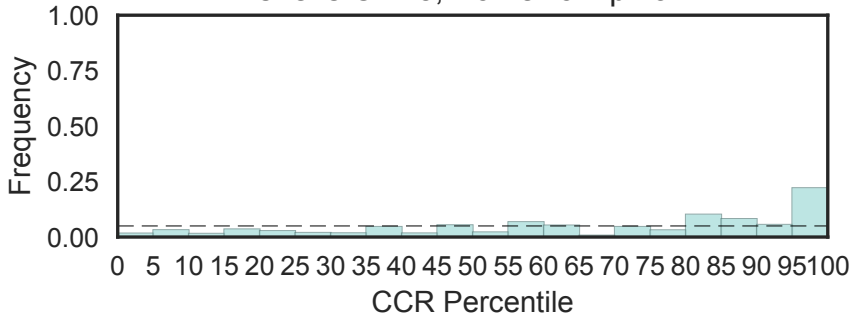

Sec8 exocyst complex component specific domain  
(Sec8\_exocyst, N=1)

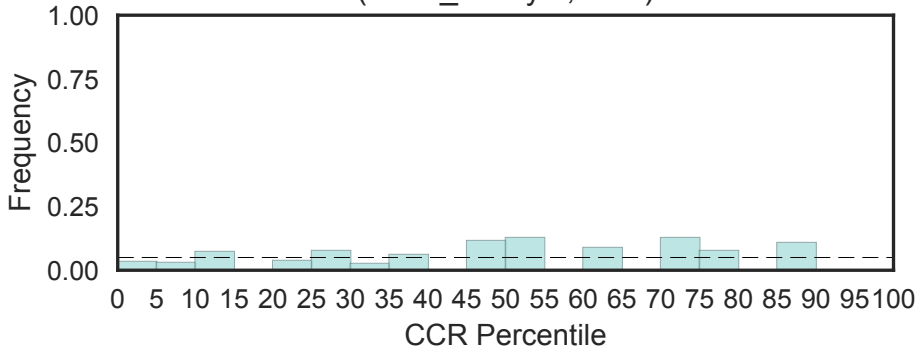

# SecE/Sec61-gamma subunits of protein translocation complex (SecE, N=1)

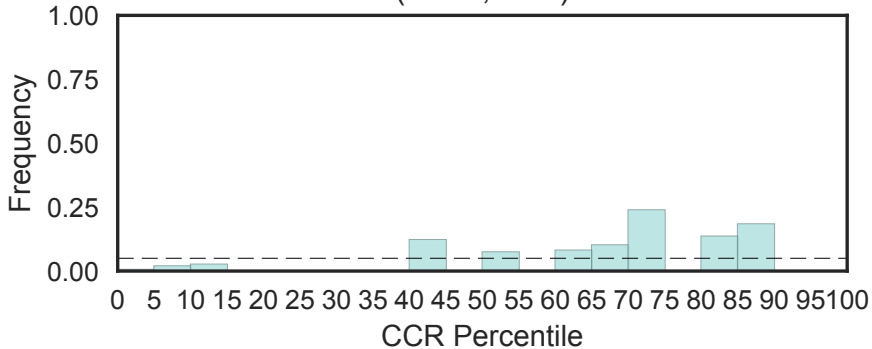

SecY translocase  
(SecY, N=4)

Fisher's OR: 5.53; Bonferroni p-val: 0.0588

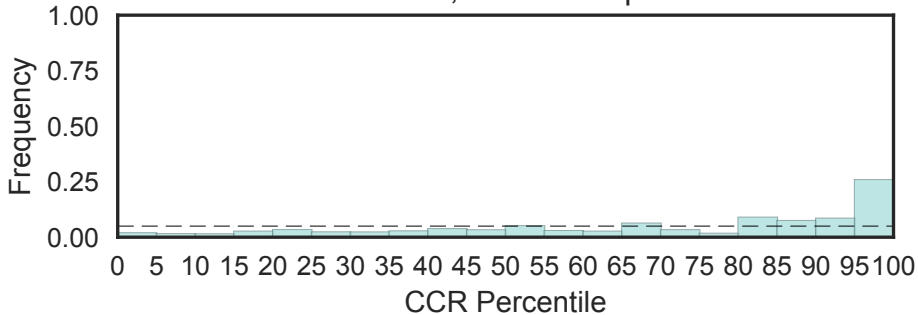

Neuroendocrine protein 7B2 precursor (Secretogranin V)  
(Secretogranin\_V, N=1)

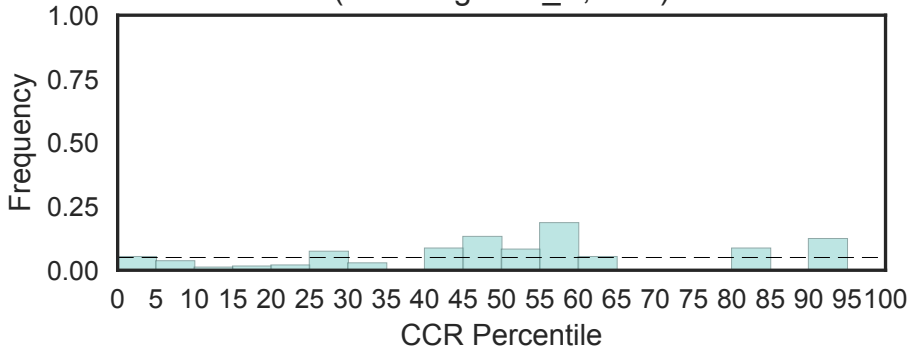

# Securin sister-chromatid separation inhibitor (Securin, N=2)

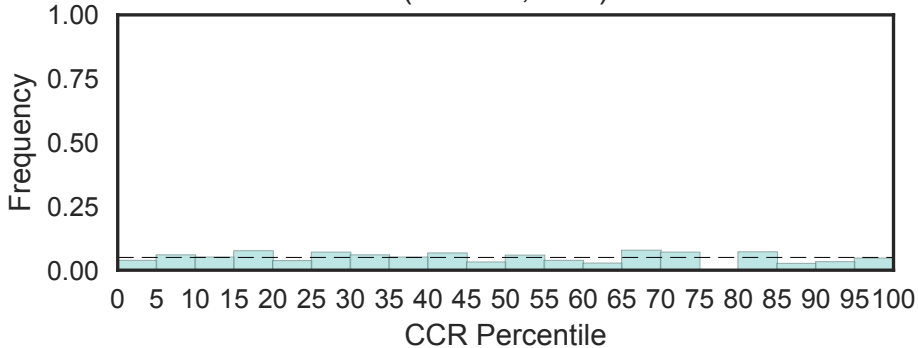

Sedlin, N-terminal conserved region  
(Sedlin\_N, N=2)

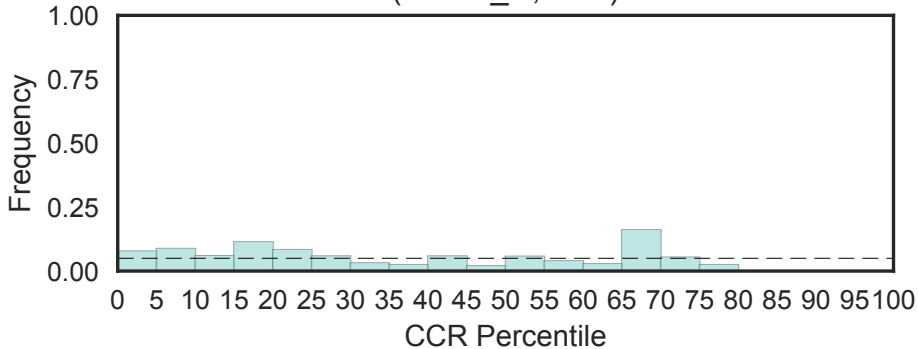

Putative adipose-regulatory protein (Seipin)  
(Seipin, N=1)

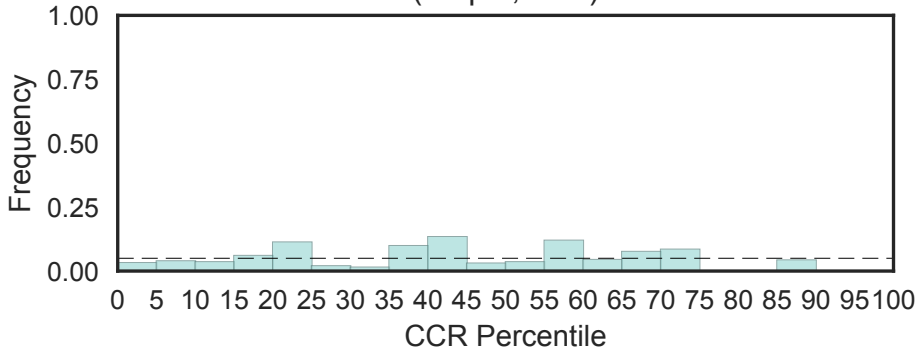



Sel1 repeat  
(Sel1, N=43)

Fisher's OR: 0.863; Bonferroni p-val: 1

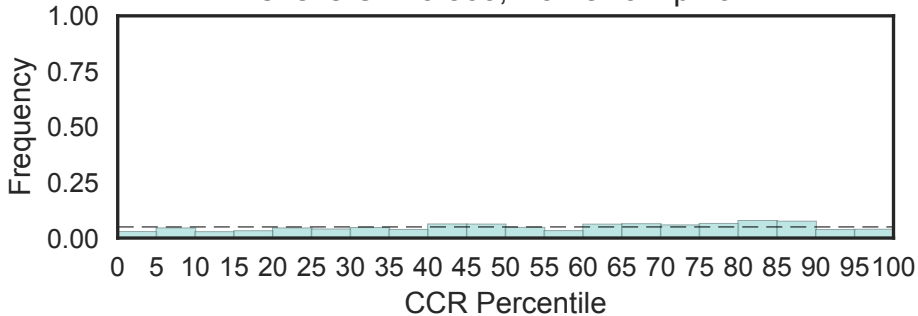

Selenoprotein SelK\_SelG  
(SelK\_SelG, N=1)

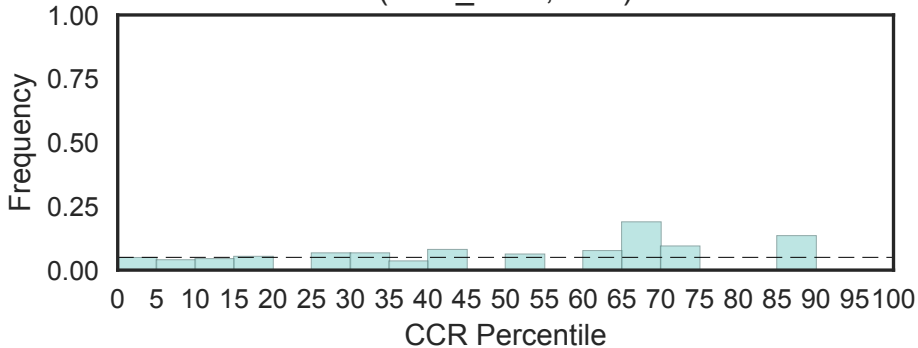

Selenoprotein P, C terminal region  
(SeIP\_C, N=1)

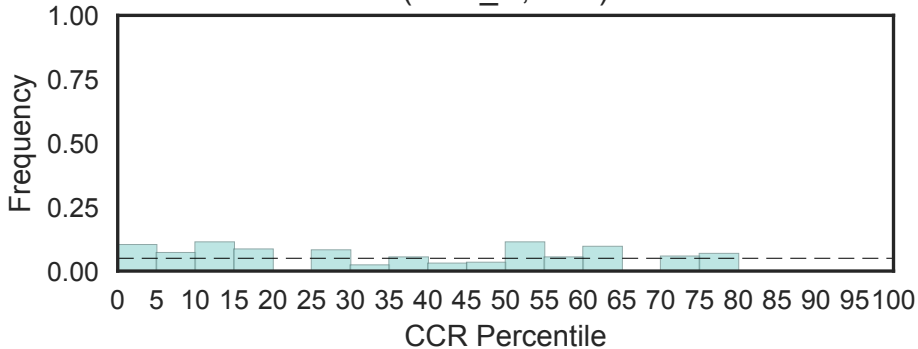

Selenoprotein P, N terminal region  
(SeIP\_N, N=1)

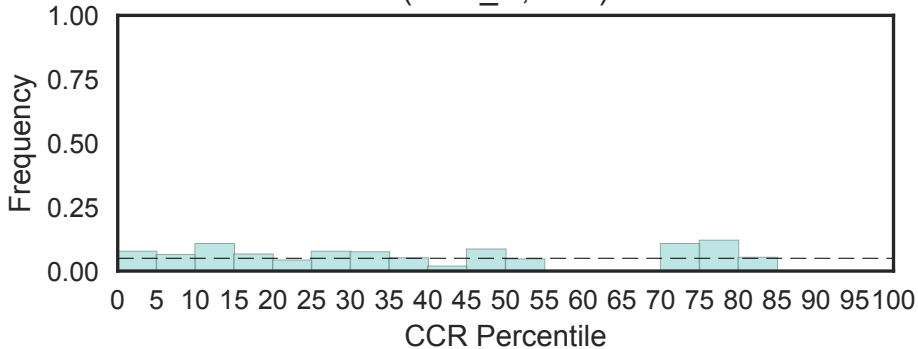

SeIR domain  
(SeIR, N=3)

Fisher's OR: 0; Bonferroni p-val: 1

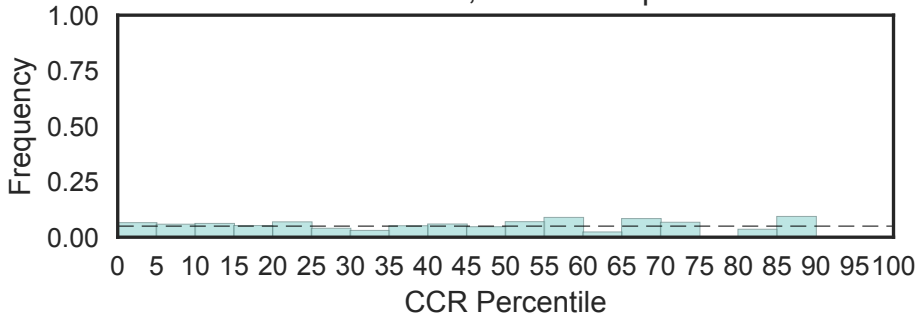

Selenoprotein S (SelS)  
(Selenoprotein\_S, N=1)

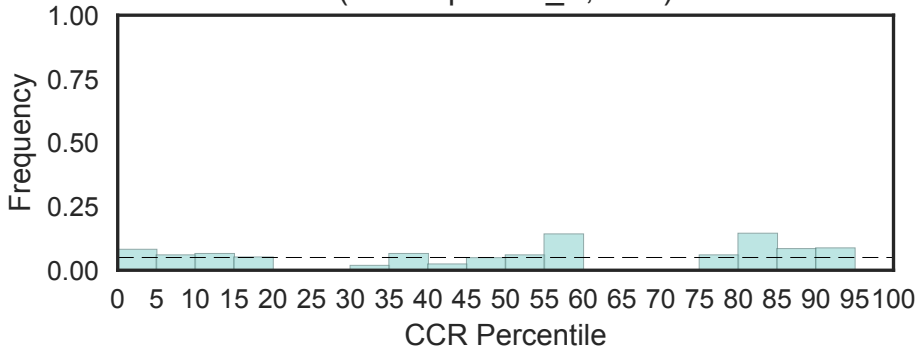

Sema domain  
(Sema, N=29)

Fisher's OR: 0.438; Bonferroni p-val: 1

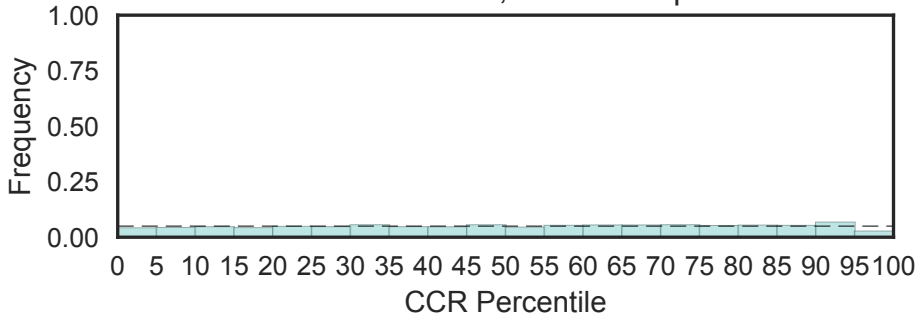

Semenogelin  
(Semenogelin, N=3)  
Fisher's OR: 0; Bonferroni p-val: 1

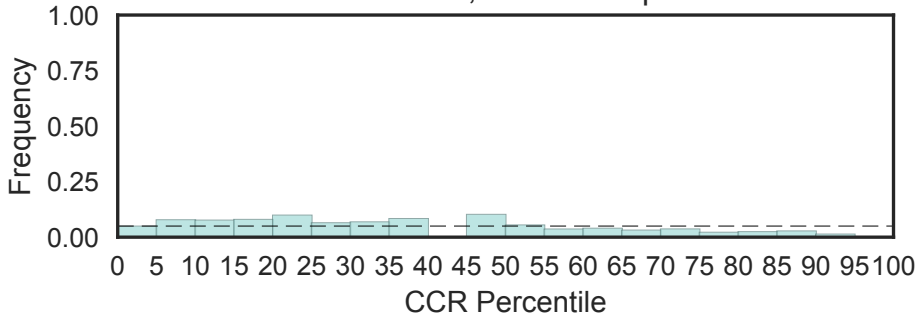



Semialdehyde dehydrogenase, NAD binding domain  
(Semialdhyde\_dh, N=1)

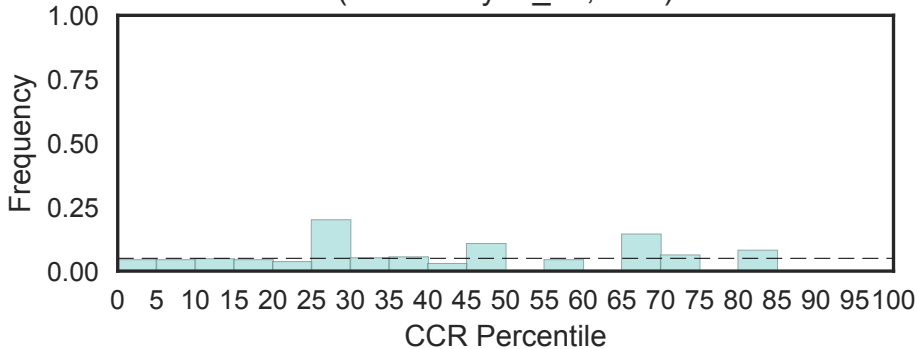

Sen15 protein  
(Sen15, N=1)

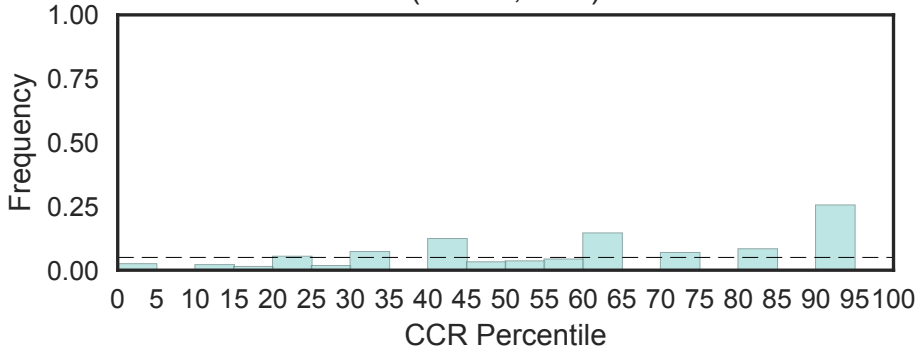

# Senescence-associated protein (Senescence, N=1)

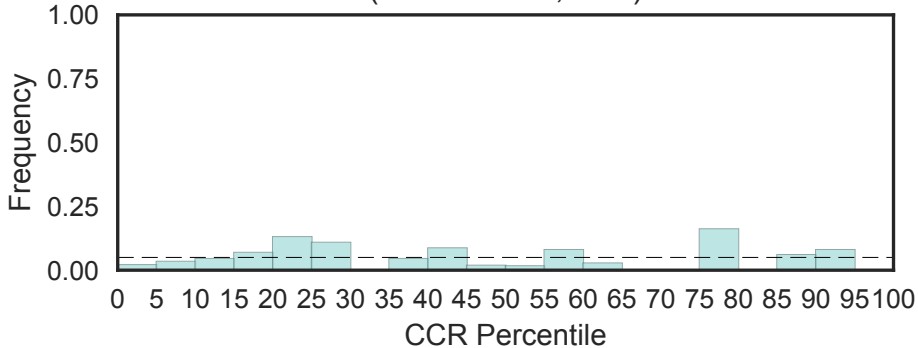

Sep15/SelM redox domain  
(Sep15\_SelM, N=2)

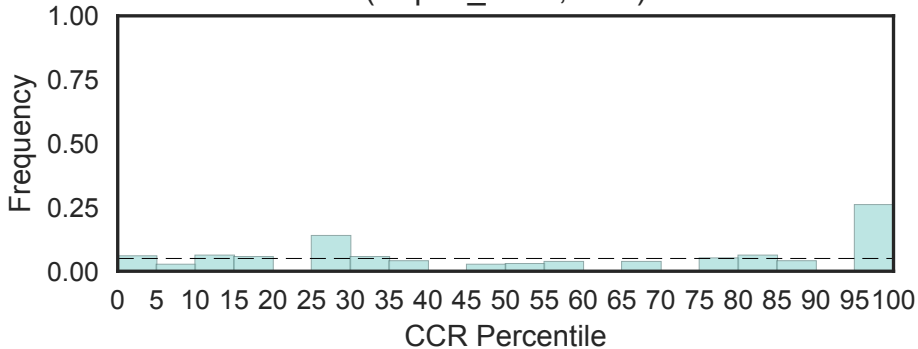

O-phosphoseryl-tRNA(Sec) selenium transferase, SepSecS  
(SepSecS, N=1)

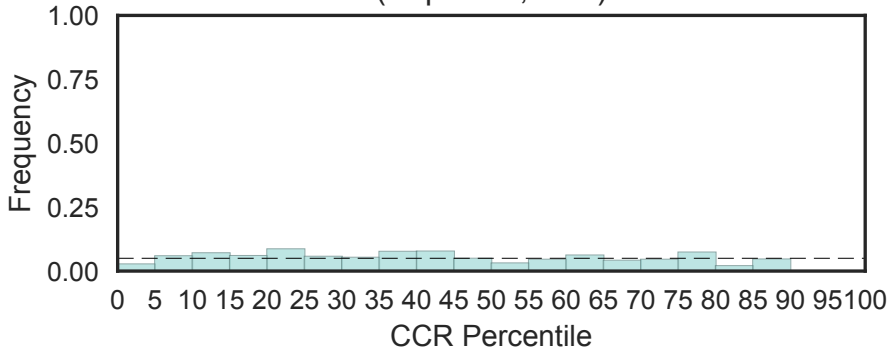

Septin  
(Septin, N=12)

Fisher's OR: 0.652; Bonferroni p-val: 1

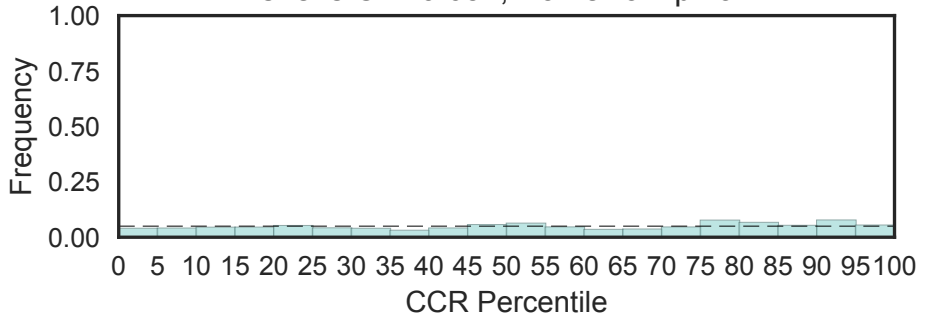

Serine hydrolase  
(Ser\_hydrolase, N=1)

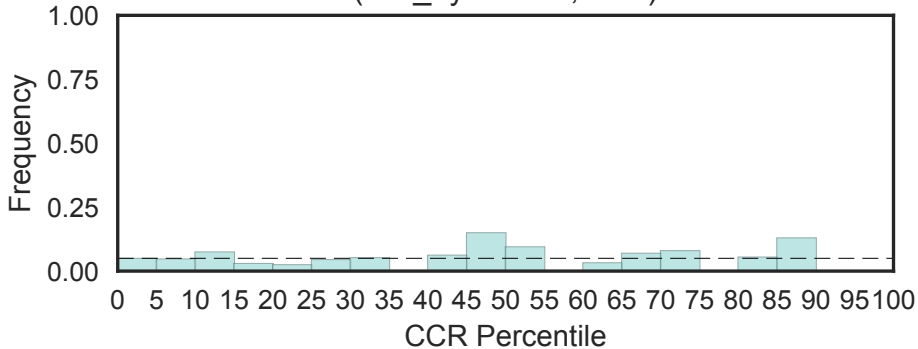

# Serglycin (Serglycin, N=1)

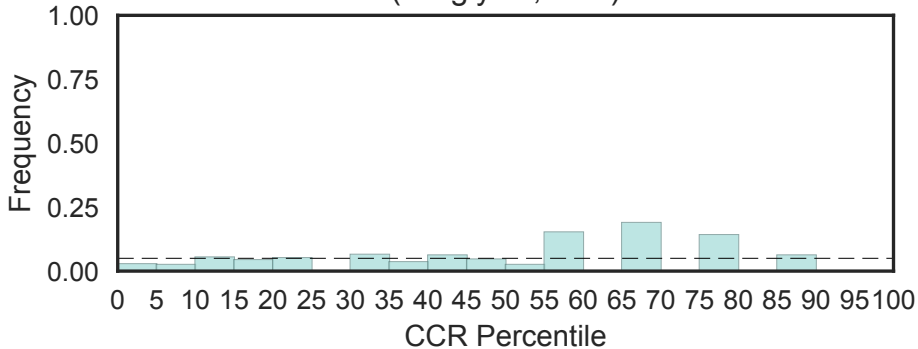



Serine incorporator (Serinc)  
(Serinc, N=7)

Fisher's OR: 0.231; Bonferroni p-val: 1

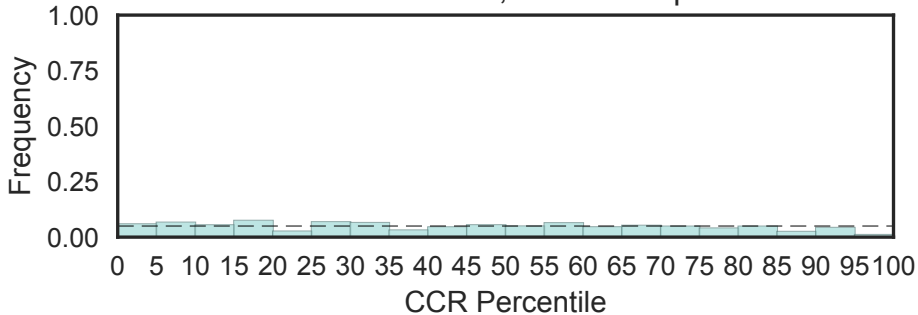

Serine rich protein interaction domain  
(Serine\_rich, N=3)

Fisher's OR: 0; Bonferroni p-val: 1

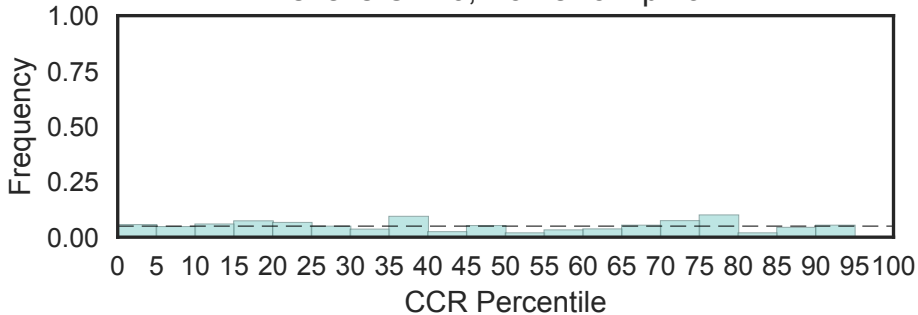

Caenorhabditis serpentine receptor-like protein, class xa  
(Serpentine\_r\_xa, N=1)

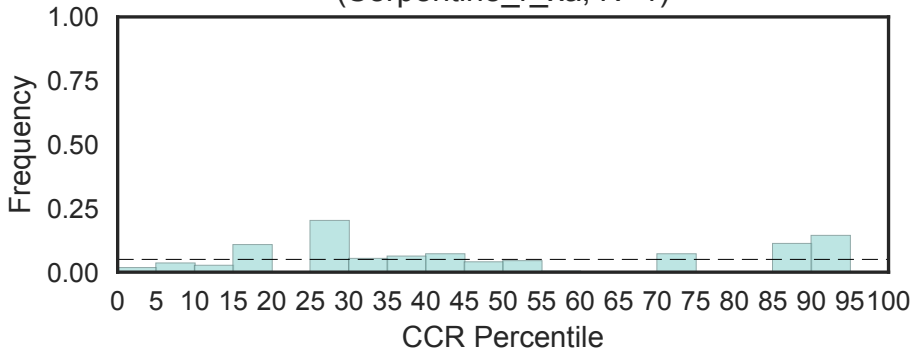

Serpin (serine protease inhibitor)  
(Serpin, N=41)

Fisher's OR: 0.0403; Bonferroni p-val: 4.79e-15

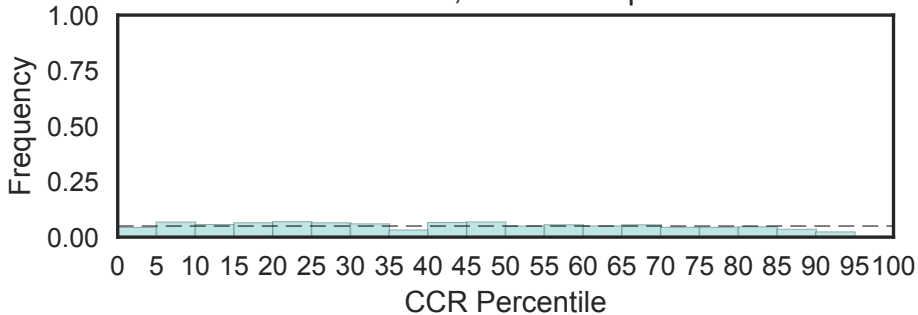

Serum albumin family  
(Serum\_albumin, N=11)  
Fisher's OR: 0.14; Bonferroni p-val: 1

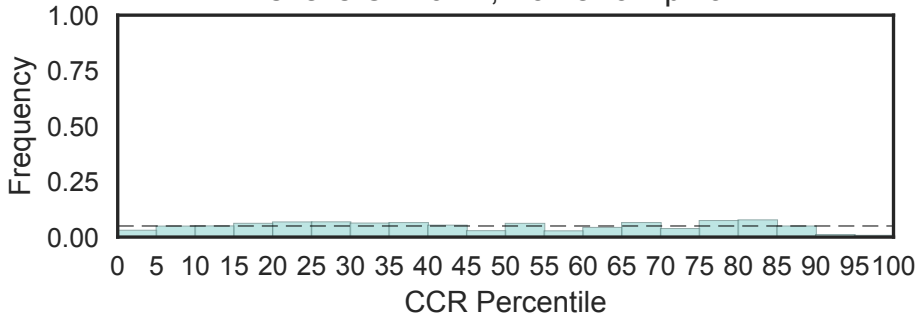

Seryl-tRNA synthetase N-terminal domain  
(Seryl\_tRNA\_N, N=1)

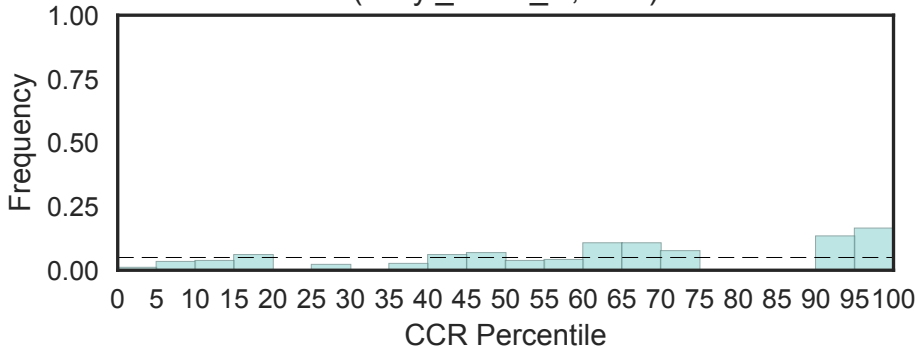

Sgf11 (transcriptional regulation protein)  
(Sgf11, N=1)

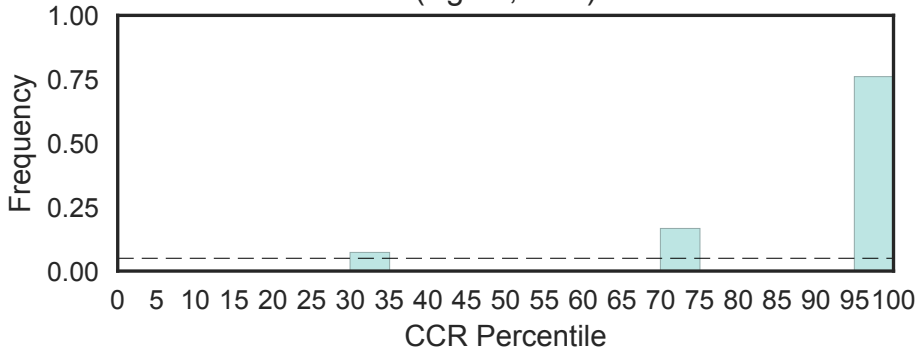

# Shal-type voltage-gated potassium channels, N-terminal (Shal-type, N=2)

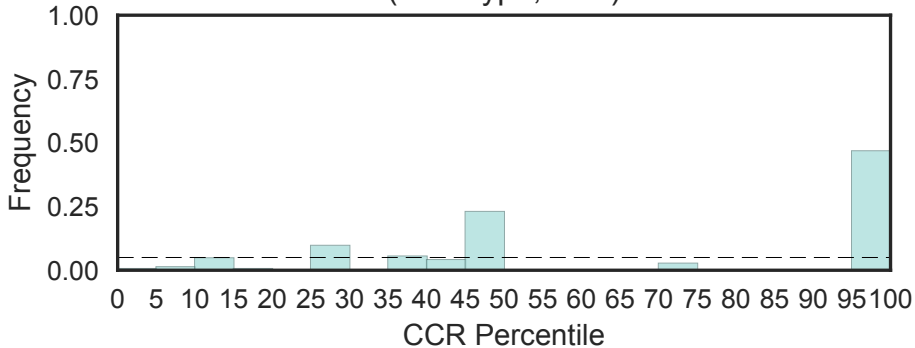



Sharpin PH domain  
(Sharpin\_PH, N=1)

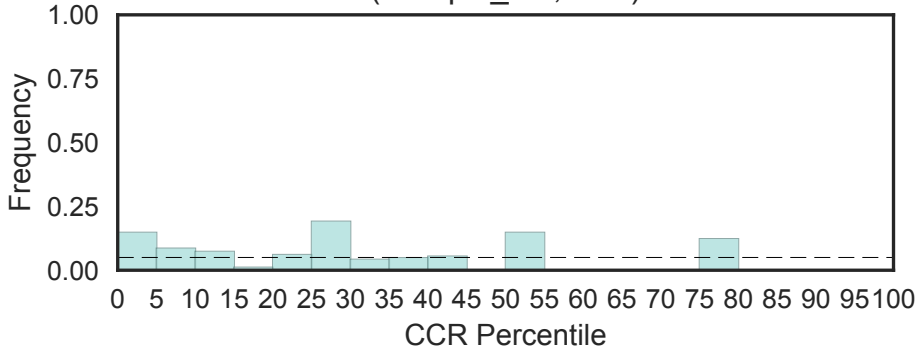

Shikimate / quinate 5-dehydrogenase  
(Shikimate\_DH, N=1)

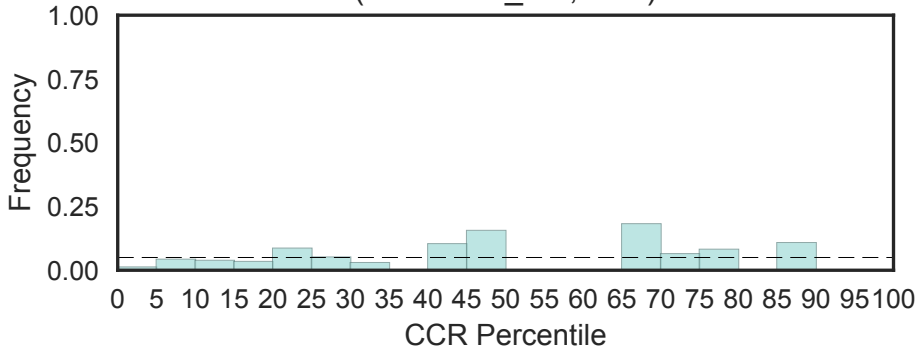

Wnt and FGF inhibitory regulator  
(Shisa, N=9)

Fisher's OR: 0.707; Bonferroni p-val: 1

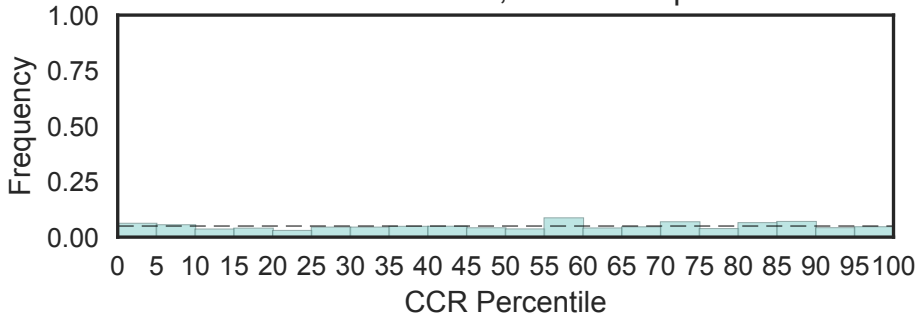

Shugoshin C terminus  
(Shugoshin\_C, N=1)

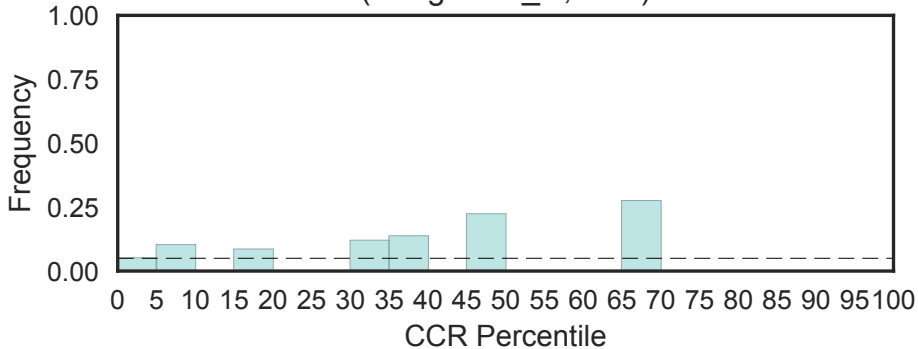

Shugoshin N-terminal coiled-coil region  
(Shugoshin\_N, N=1)

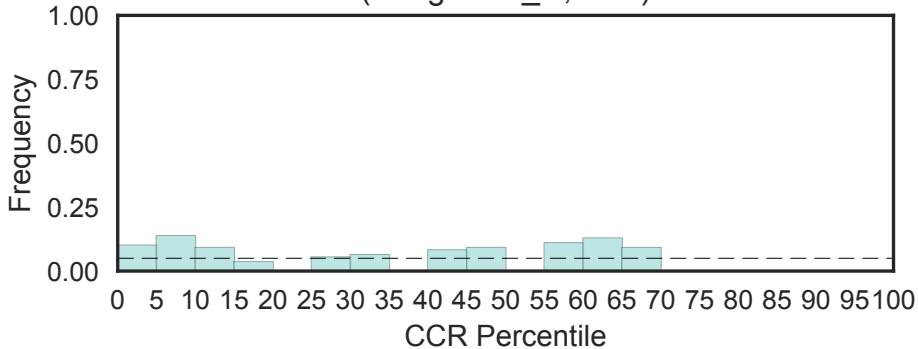

Siah interacting protein, N terminal  
(Siah-Interact\_N, N=1)

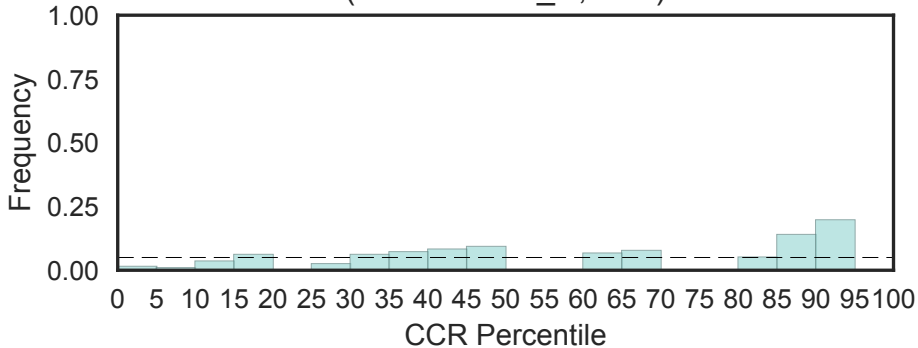

Sigma-54 interaction domain  
(Sigma54\_activ\_2, N=1)

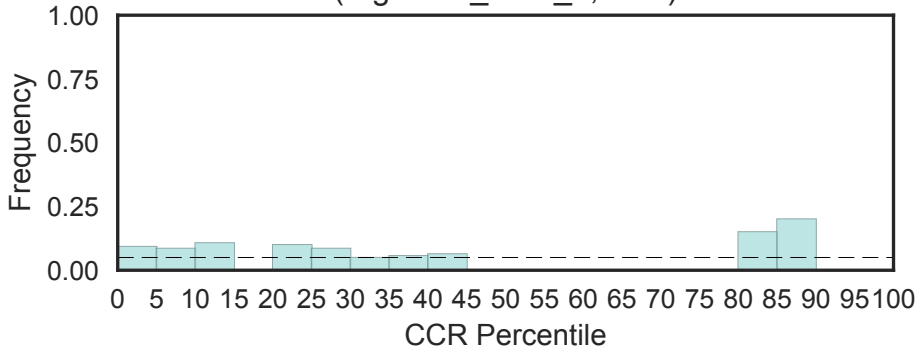

Sigma-54 interaction domain  
(Sigma54\_activat, N=2)

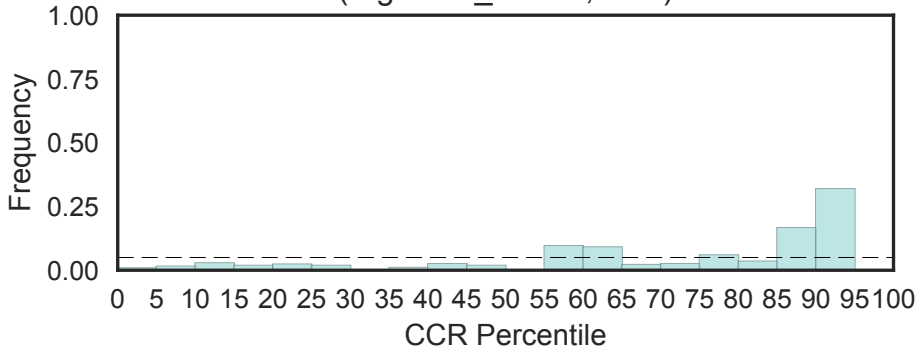



Sin3 family co-repressor  
(Sin3\_corepress, N=3)  
Fisher's OR: 10; Bonferroni p-val: 1

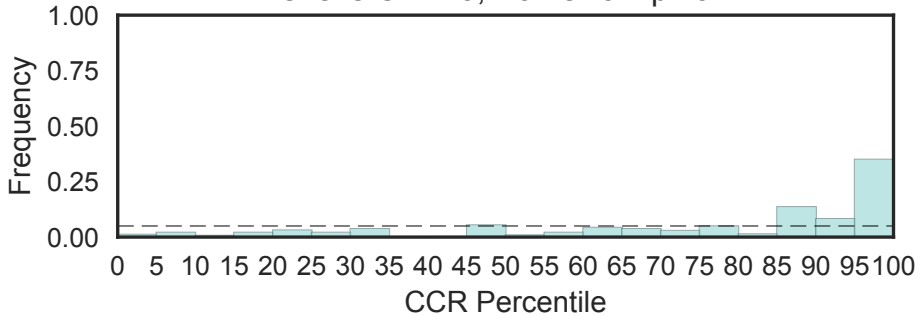

C-terminal domain of Sin3a protein  
(Sin3a\_C, N=2)

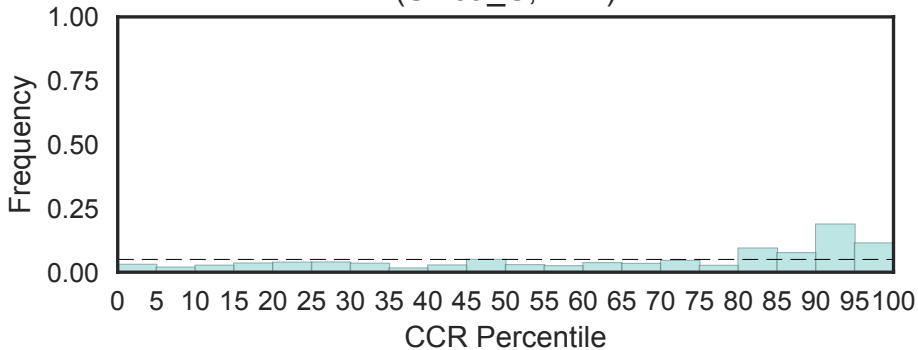

Sin-like protein conserved region  
(Sin\_N, N=1)

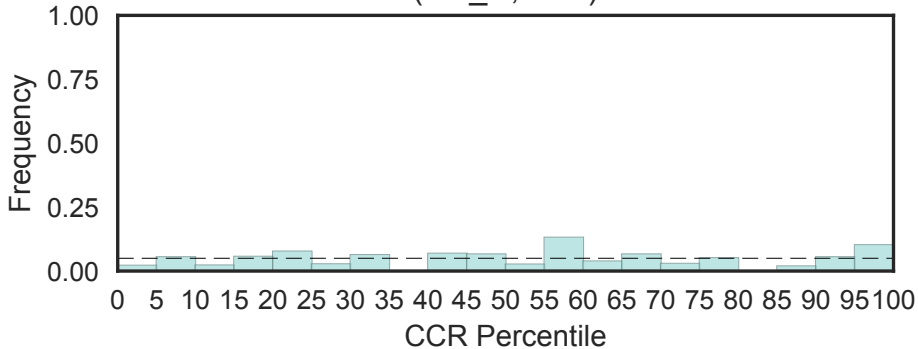

Seven in absentia protein family  
(Sina, N=4)  
Fisher's OR: 4.54; Bonferroni p-val: 1

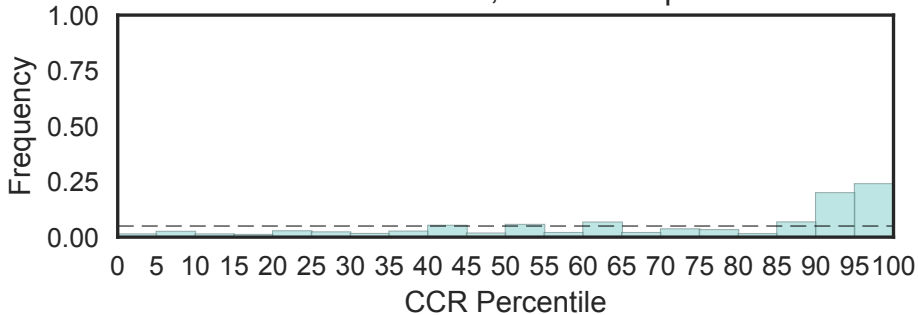

Cd27 binding protein (Siva)  
(Siva, N=2)

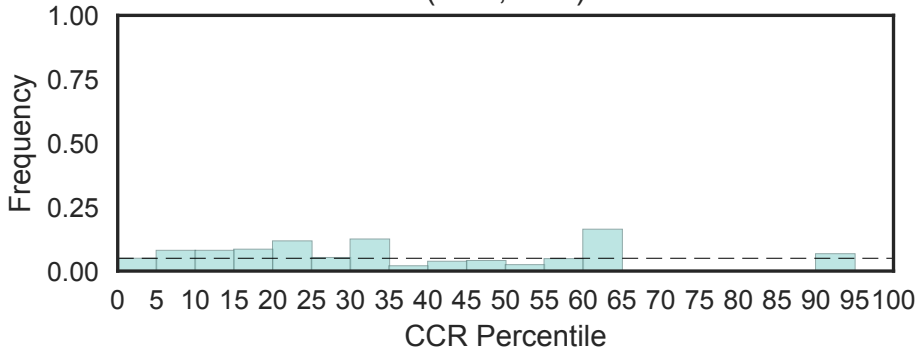

SKI/SNO/DAC family  
(Ski\_Sno, N=6)

Fisher's OR: 4.58; Bonferroni p-val: 1

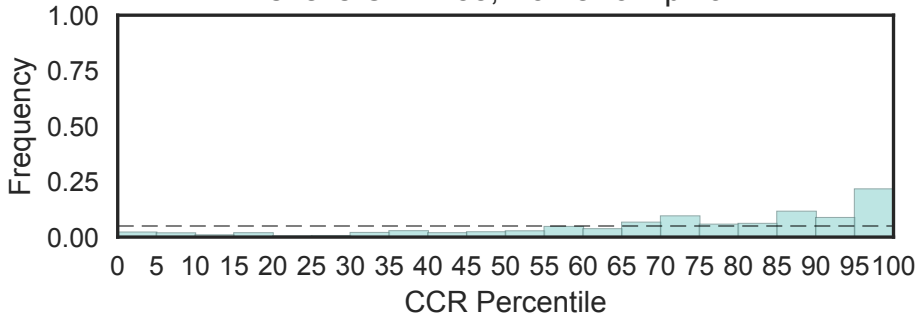

Skp1 family, dimerisation domain  
(Skp1, N=1)

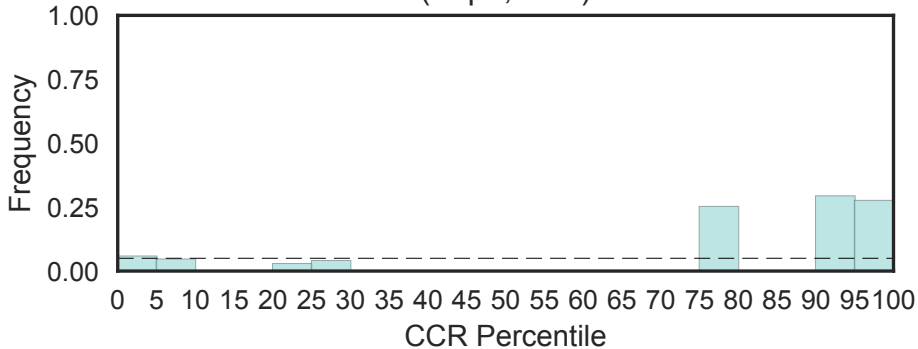

Skp1 family, tetramerisation domain  
(Skp1\_POZ, N=3)

Fisher's OR: 33.8; Bonferroni p-val: 0.00705

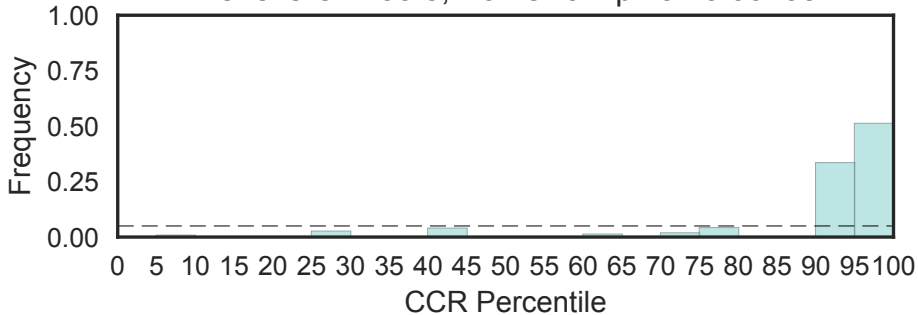



GINS complex protein  
(Sld5, N=3)

Fisher's OR: 0; Bonferroni p-val: 1

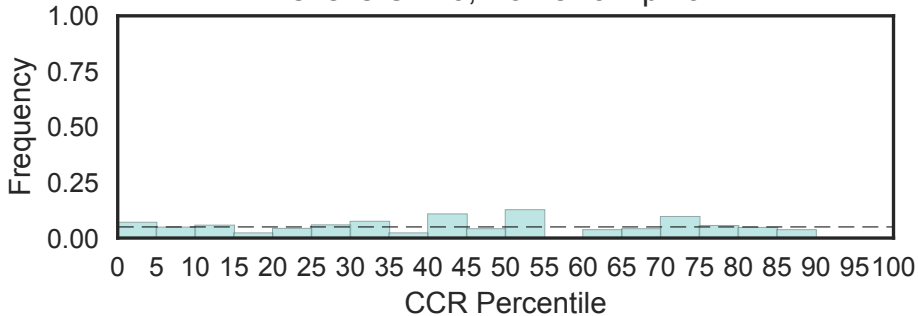

Pre-mRNA splicing Prp18-interacting factor  
(Slu7, N=1)

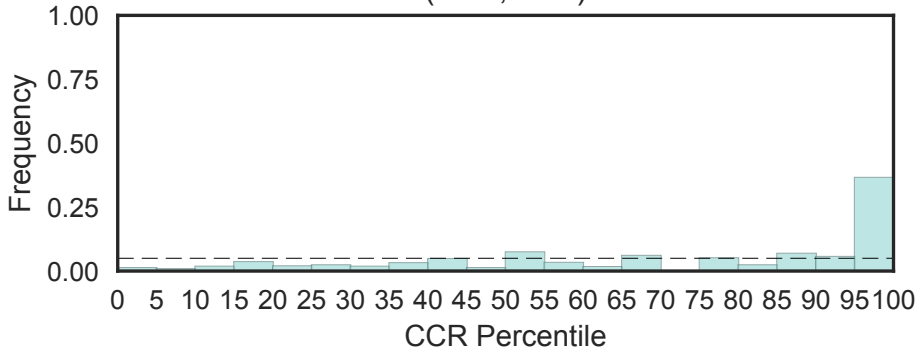

Slx4 endonuclease  
(Slx4, N=1)

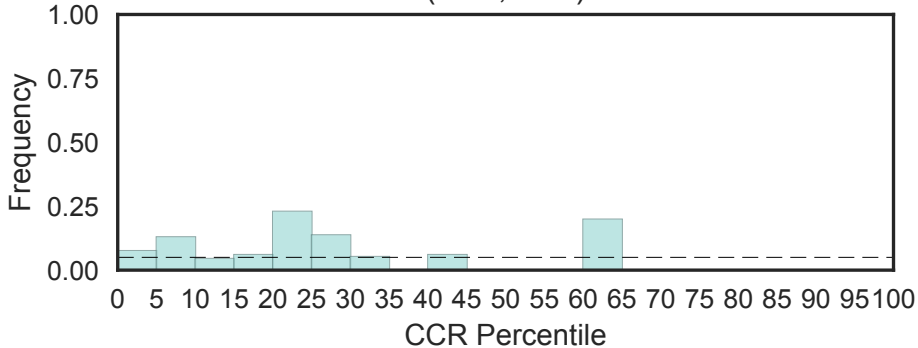

Small membrane A-kinase anchor protein  
(SmAKAP, N=1)

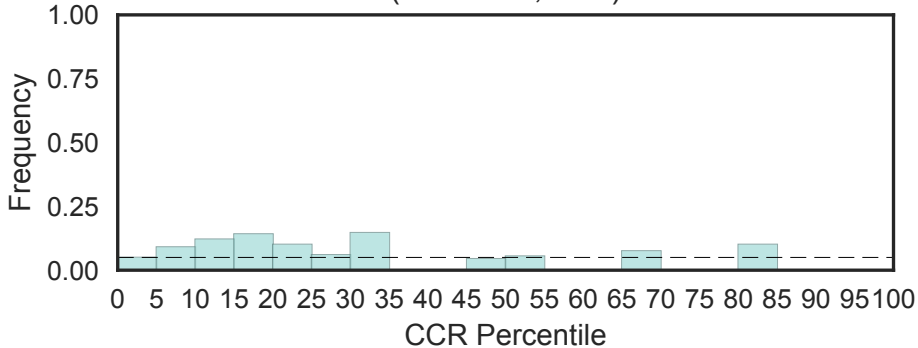

# Second Mitochondria-derived Activator of Caspases (Smac\_DIABLO, N=1)

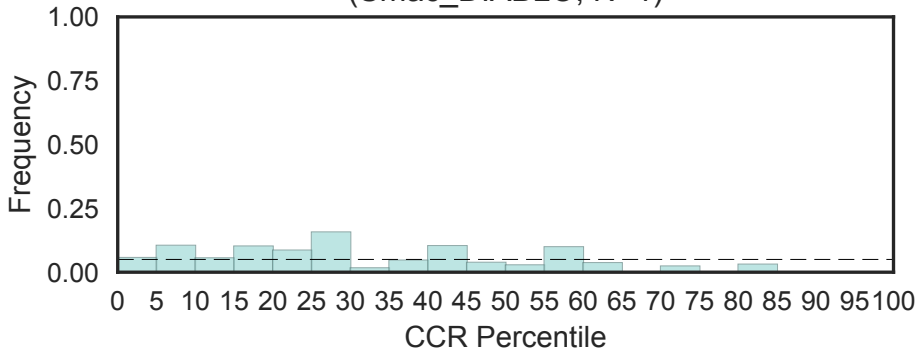

Smg-4/UPF3 family  
(Smg4\_UPF3, N=1)

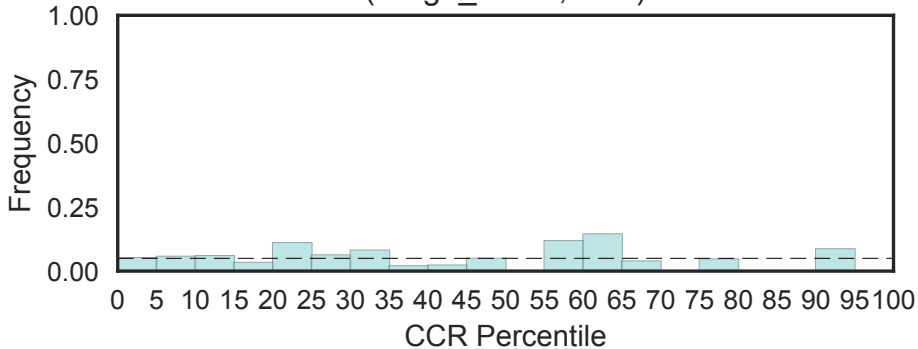

Smg8\_Smg9  
(Smg8\_Smg9, N=3)

Fisher's OR: 1.14; Bonferroni p-val: 1

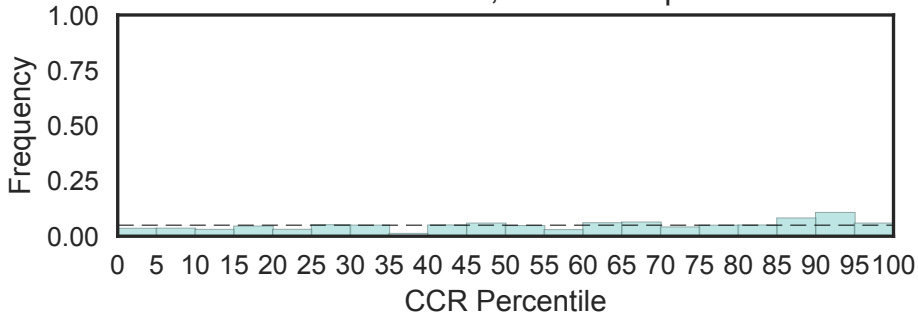

# Small integral membrane protein 3 (Smim3, N=1)

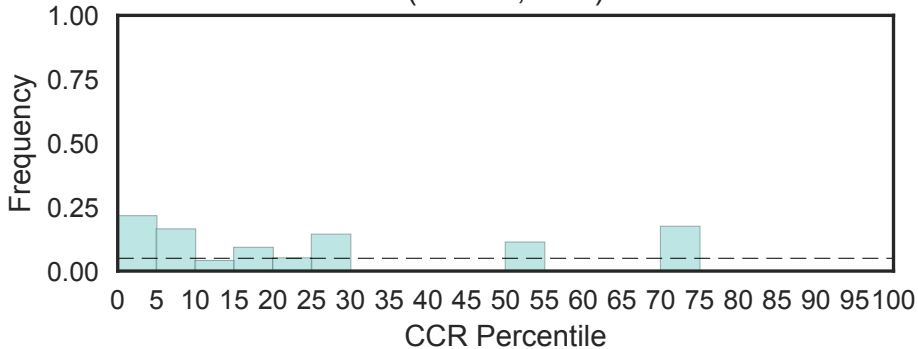



Smoothelin cytoskeleton protein  
(Smoothelin, N=3)

Fisher's OR: 0; Bonferroni p-val: 1

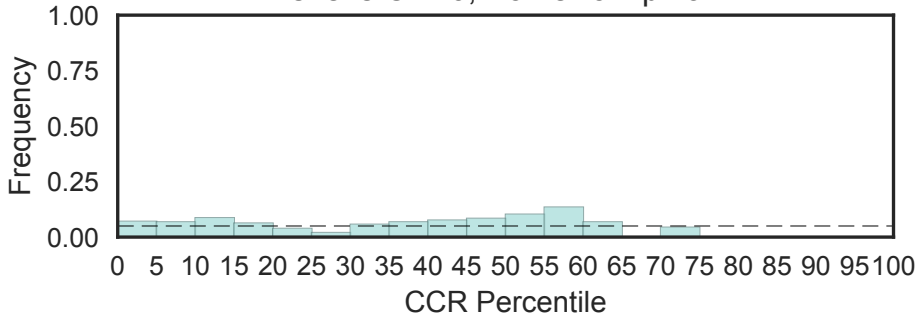

Smr domain  
(Smr, N=1)

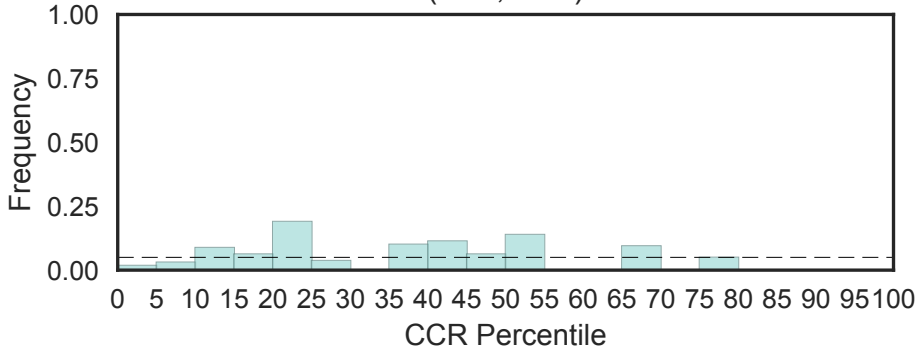

# Snf2-ATP coupling, chromatin remodelling complex (SnAC, N=2)

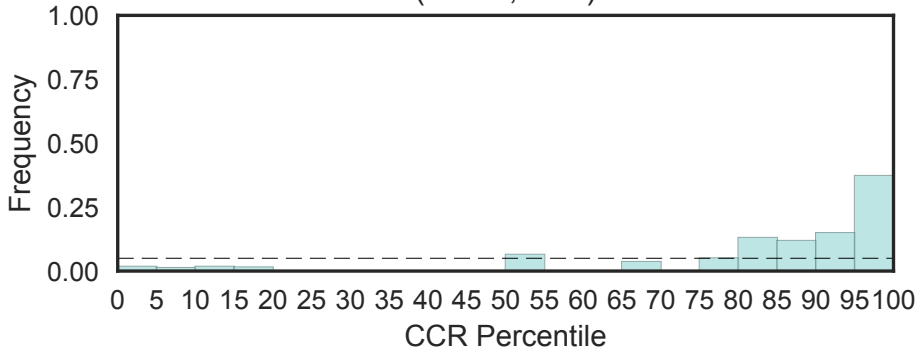

Small nuclear RNA activating complex subunit 2, SNAP190 Myb  
(SnAPC\_2\_like, N=1)

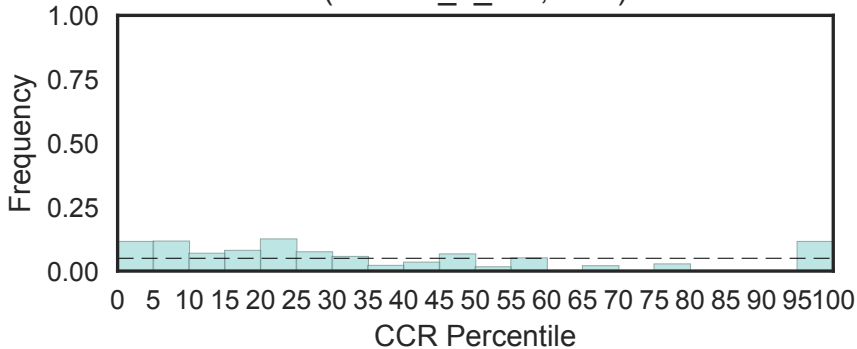

Snapin/Pallidin  
(Snapin\_Pallidin, N=2)

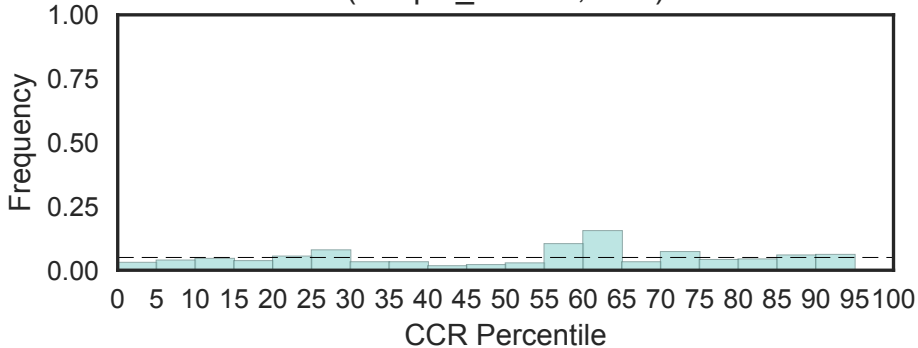

# Snf7

(Snf7, N=13)

Fisher's OR: 0.142; Bonferroni p-val: 1

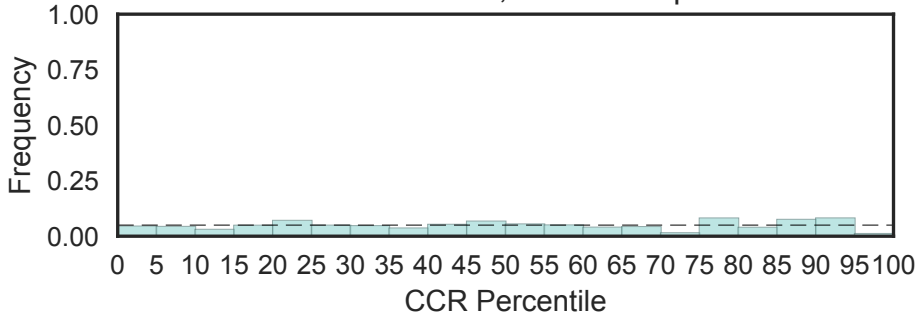

SnoaL-like domain  
(SnoaL\_3, N=4)  
Fisher's OR: 3.57; Bonferroni p-val: 1

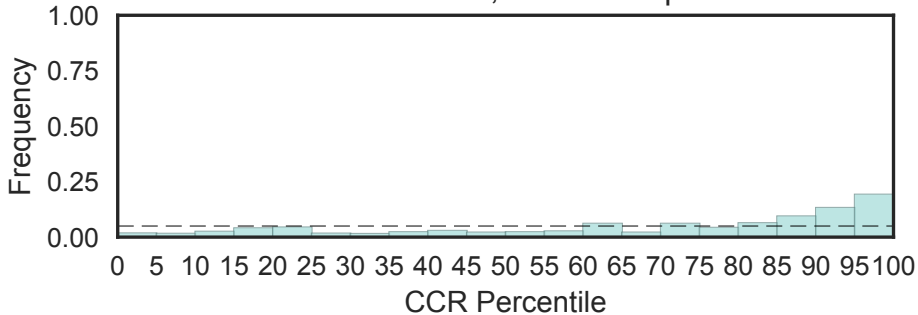

# Snurportin1 (Snurportin1, N=1)

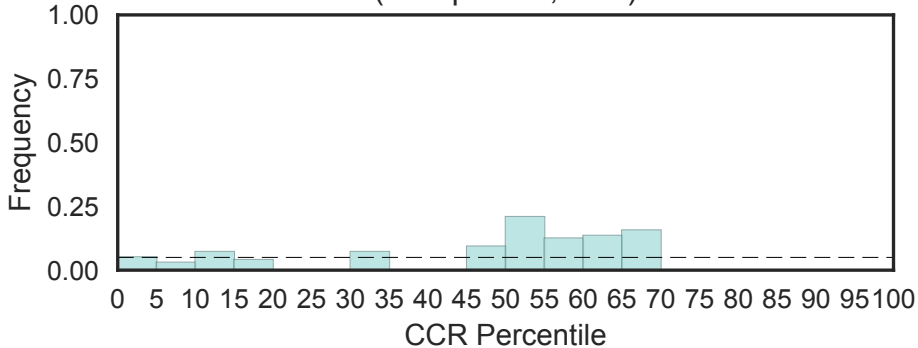



Copper/zinc superoxide dismutase (SODC)  
(Sod\_Cu, N=3)

Fisher's OR: 0; Bonferroni p-val: 1

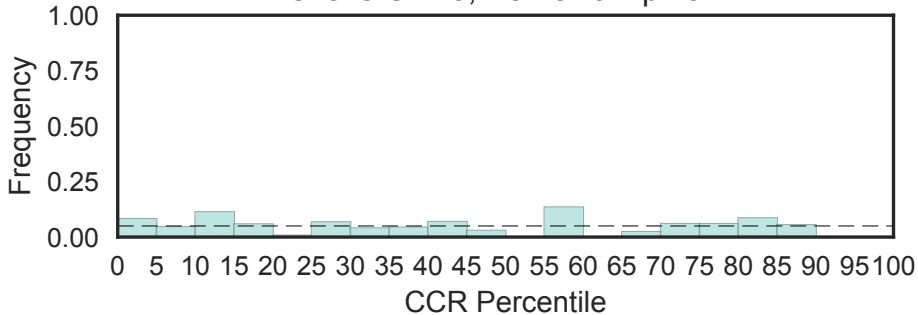

Iron/manganese superoxide dismutases, C-terminal domain  
(Sod\_Fe\_C, N=1)

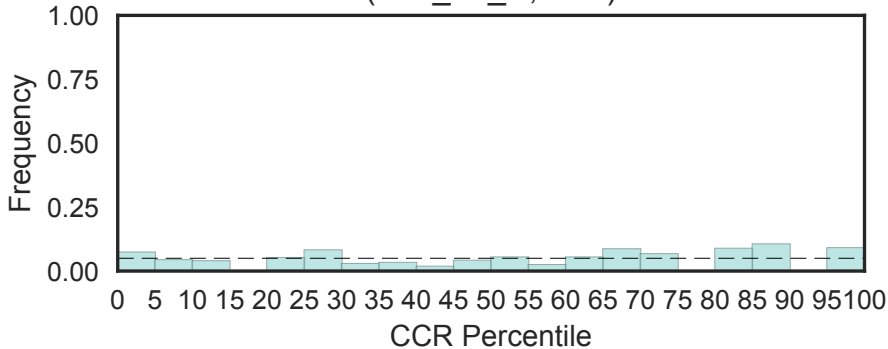

Iron/manganese superoxide dismutases, alpha-hairpin domain  
(Sod\_Fe\_N, N=1)

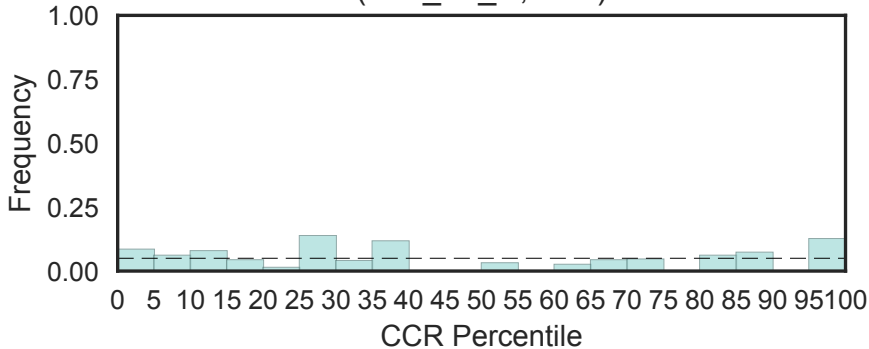

Sof1-like domain  
(Sof1, N=1)

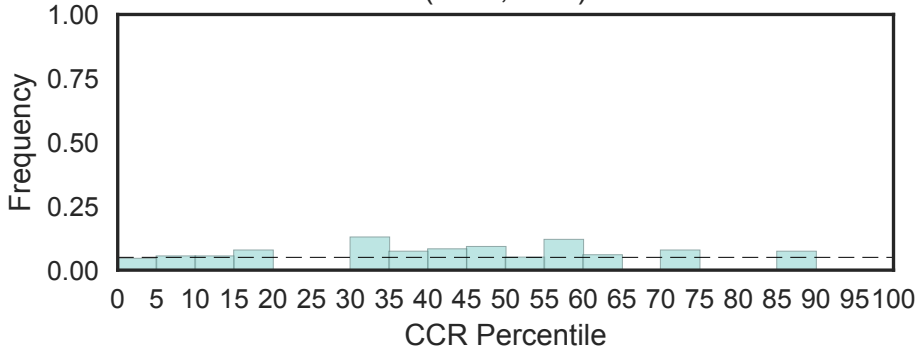

Organic solute transporter Ostalpha  
(Solute\_trans\_a, N=5)  
Fisher's OR: 0.53; Bonferroni p-val: 1

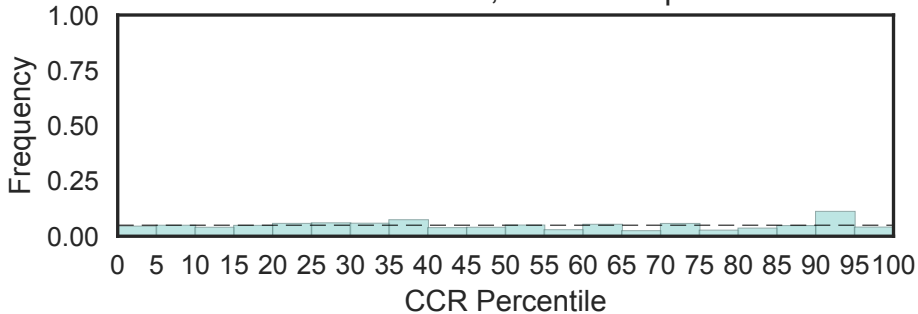

Somatomedin B domain  
(Somatomedin\_B, N=13)  
Fisher's OR: 0; Bonferroni p-val: 1

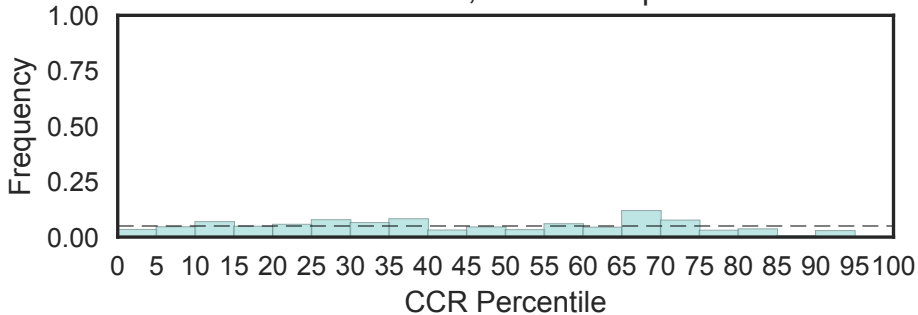

Somatostatin/Cortistatin family  
(Somatostatin, N=4)

Fisher's OR: 0; Bonferroni p-val: 1

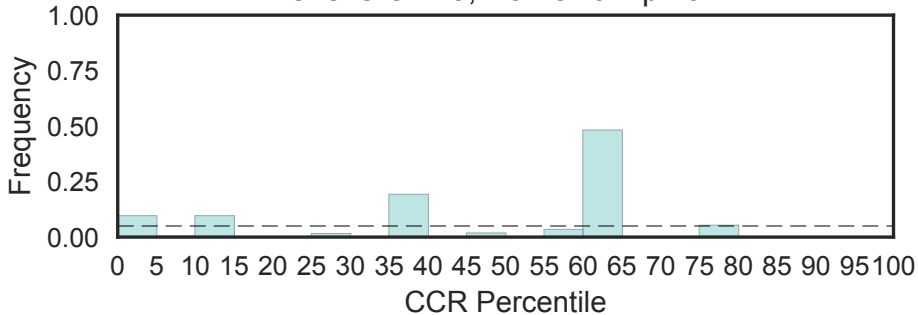

Sorbin homologous domain  
(Sorb, N=3)

Fisher's OR: 0; Bonferroni p-val: 1

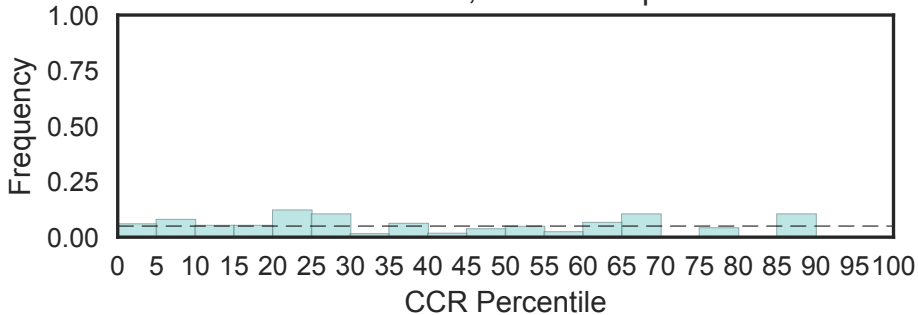



Sororin protein  
(Sororin, N=1)

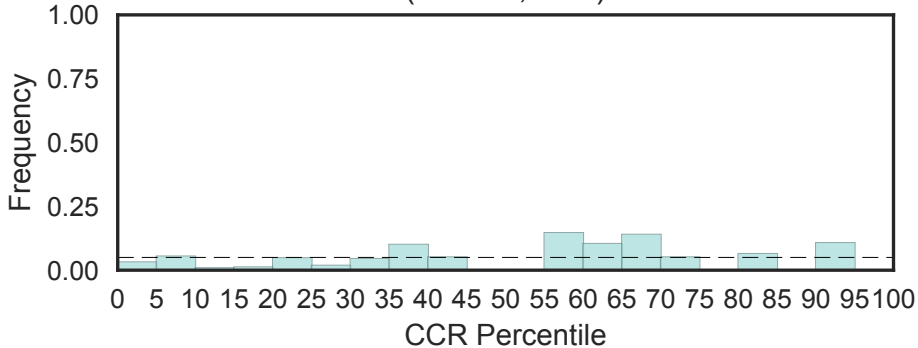

Sortilin, neurotensin receptor 3,  
(Sortilin-Vps10, N=6)  
Fisher's OR: 0.33; Bonferroni p-val: 1

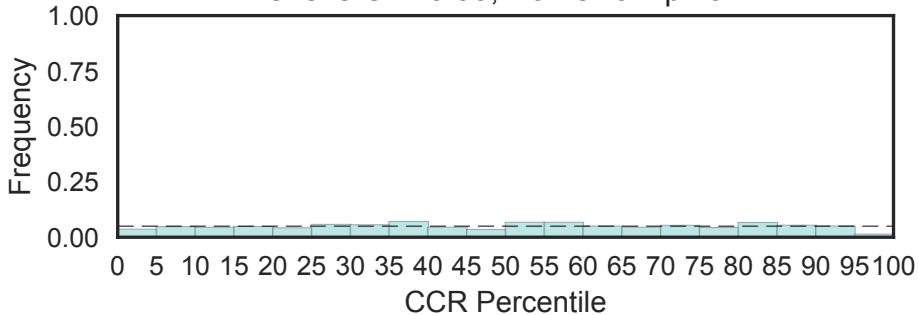

Sortilin, neurotensin receptor 3, C-terminal  
(Sortilin\_C, N=5)

Fisher's OR: 0.377; Bonferroni p-val: 1

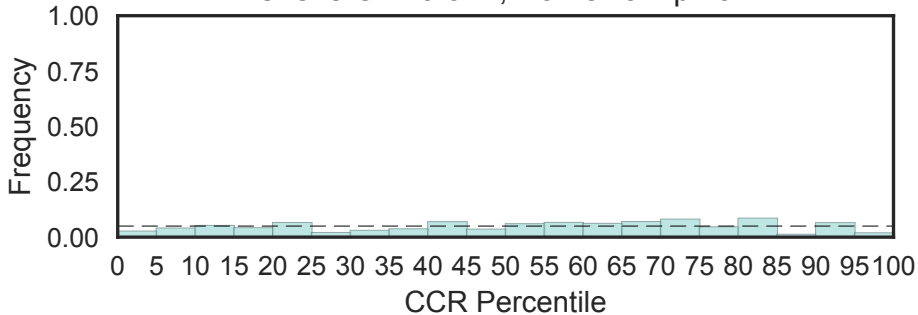

Sorting nexin, N-terminal domain  
(Sorting\_nexin, N=2)

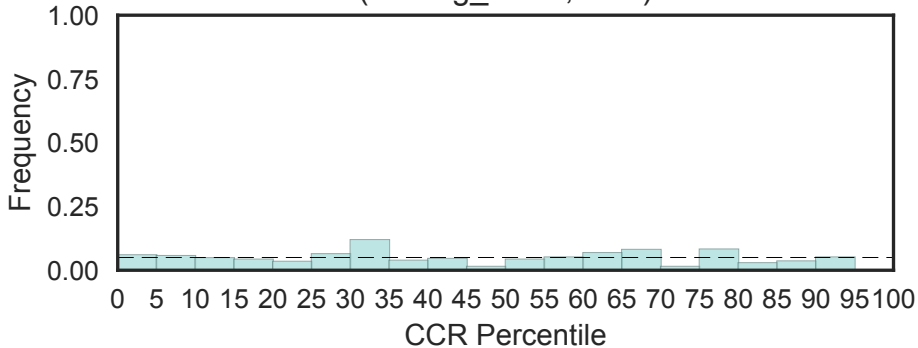

Sox 17/18 central domain  
(Sox17\_18\_mid, N=3)  
Fisher's OR: 0; Bonferroni p-val: 1

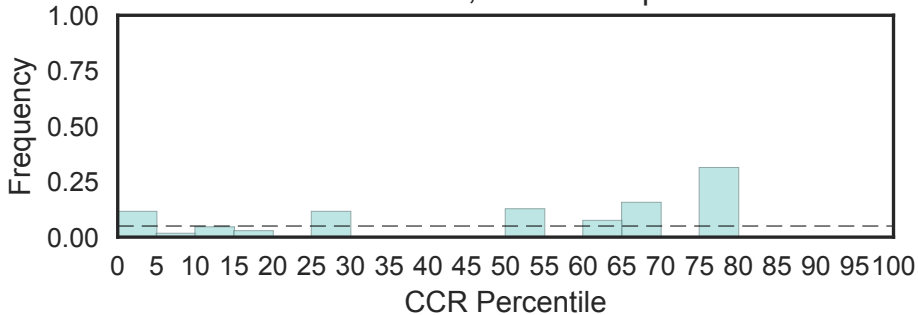

Sarcosine oxidase, gamma subunit family  
(SoxG, N=1)

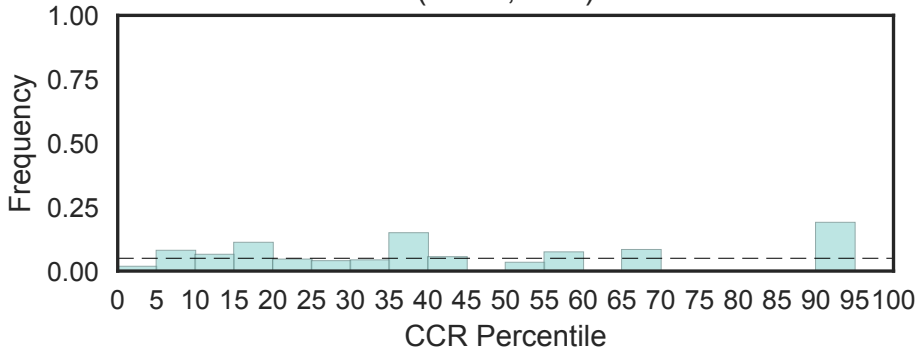

Sox developmental protein N terminal  
(Sox\_N, N=3)

Fisher's OR: 6.98; Bonferroni p-val: 1

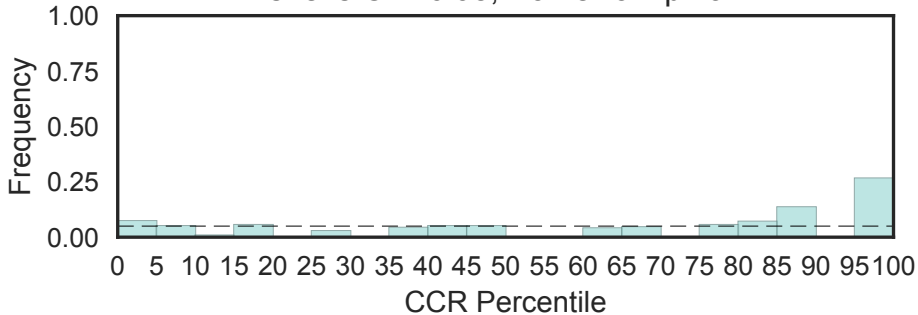

Zona-pellucida-binding protein (Sp38)  
(Sp38, N=2)

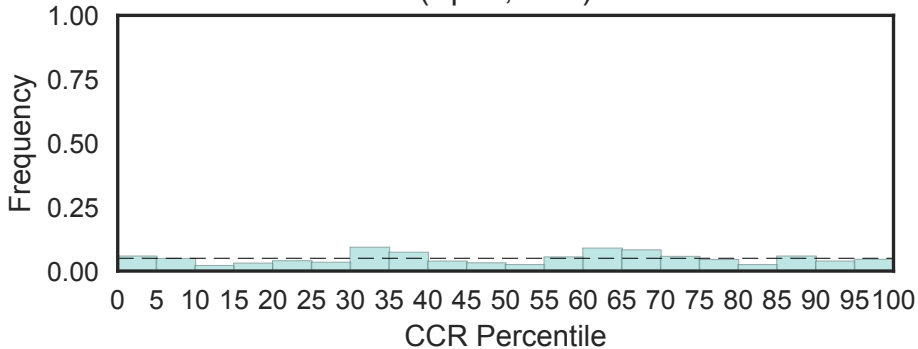



Spatacsin C-terminus  
(Spatacsin\_C, N=1)

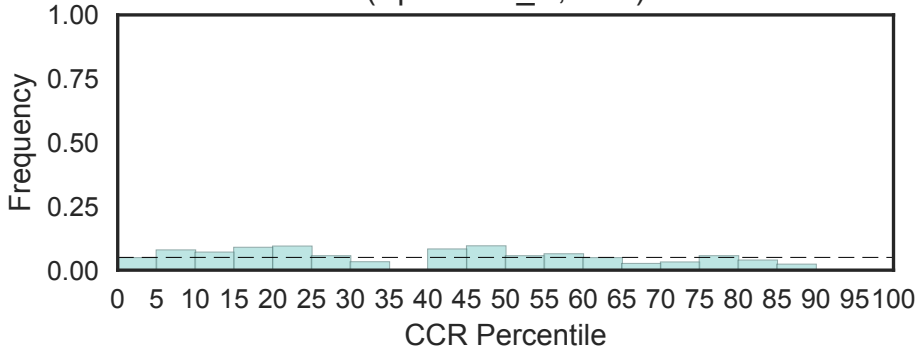

Spb1 C-terminal domain  
(Spb1\_C, N=1)

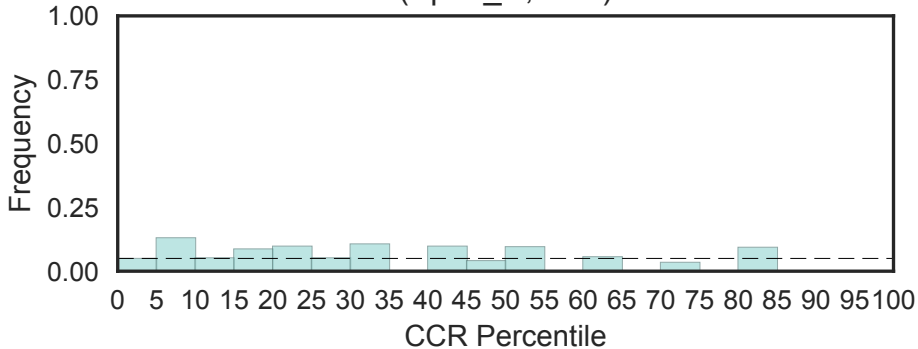

Spc24 subunit of Ndc80  
(Spc24, N=1)

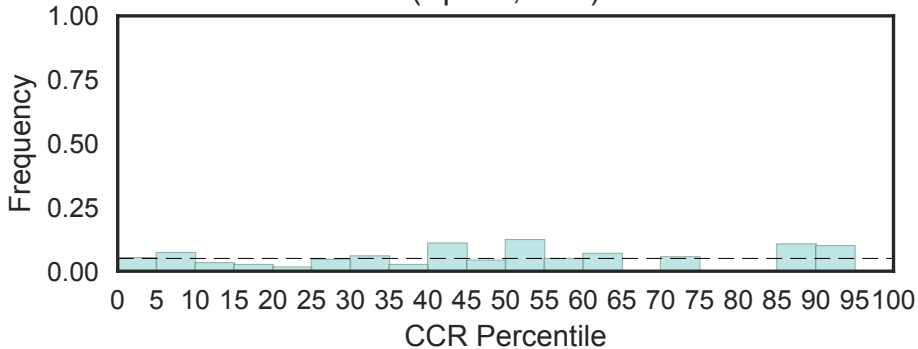

Spc97 / Spc98 family  
(Spc97\_Spc98, N=5)

Fisher's OR: 0.333; Bonferroni p-val: 1

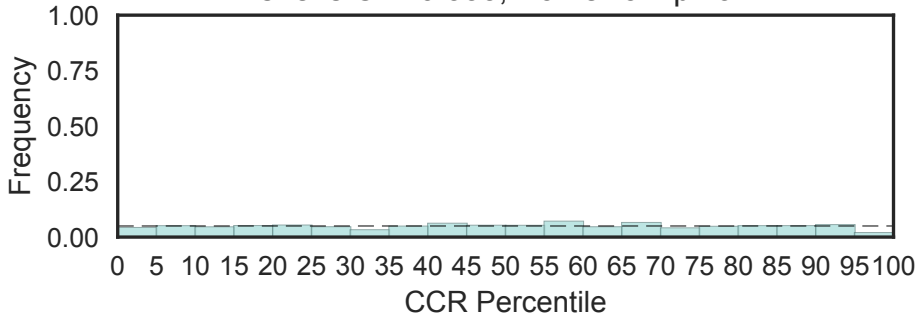

# Ectodermal ciliogenesis protein (Spec3, N=1)

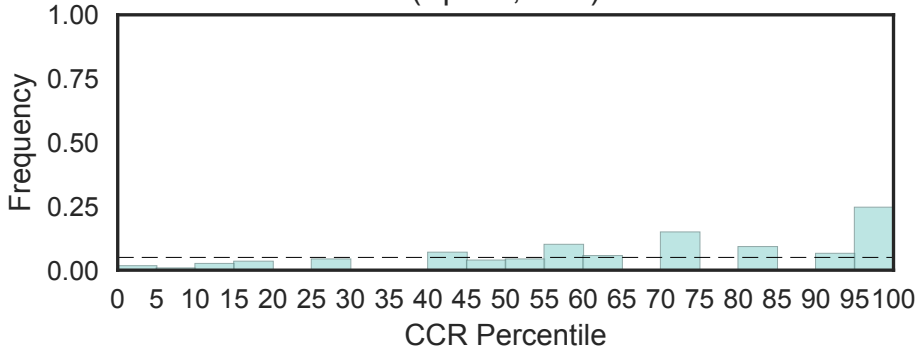

Spectrin repeat  
(Spectrin, N=227)

Fisher's OR: 0.942; Bonferroni p-val: 1

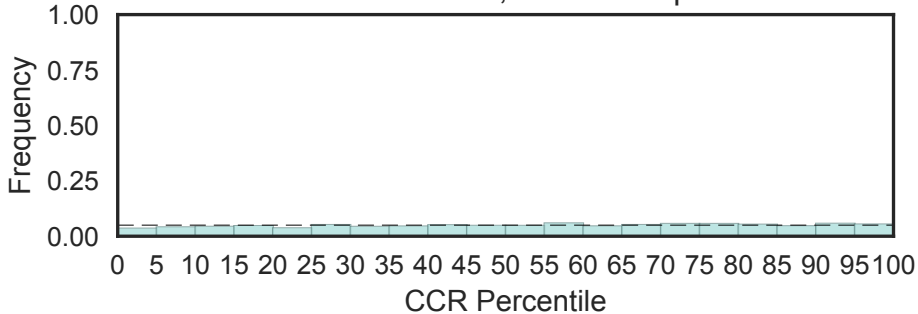

# Spermatid maturation protein 1 (Spem1, N=2)

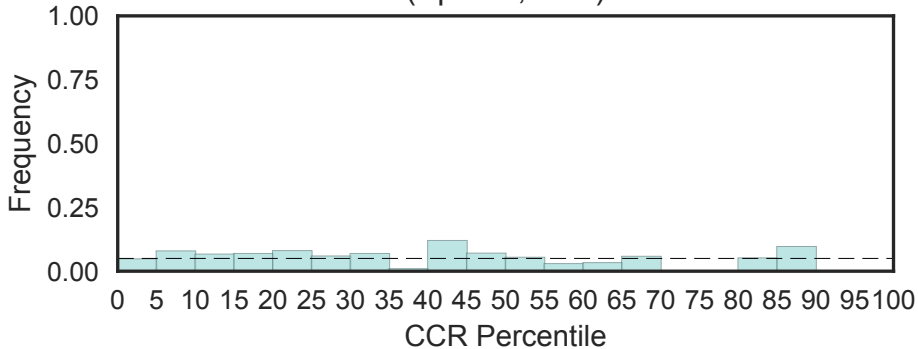

Speriolin C-terminus  
(Speriolin\_C, N=2)

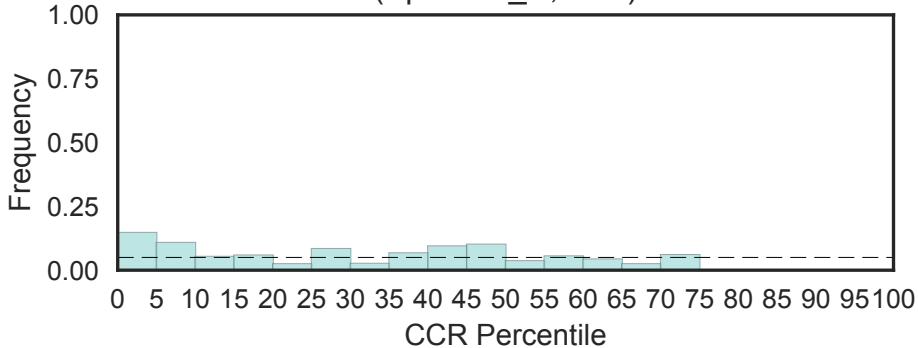



Speriolin N terminus  
(Speriolin\_N, N=2)

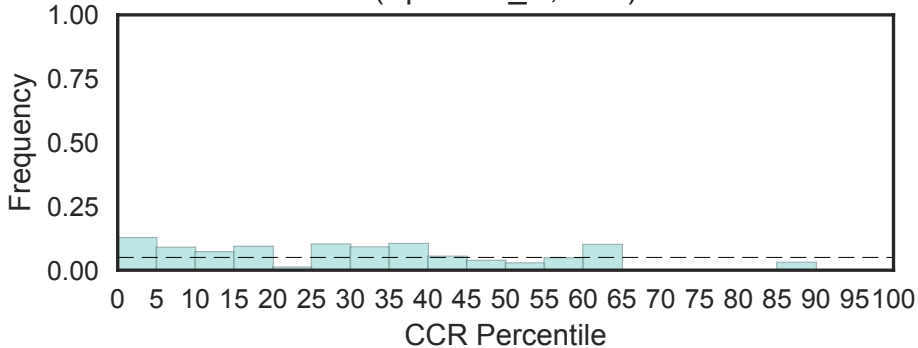

Spermidine synthase tetramerisation domain  
(Spermine\_synt\_N, N=1)

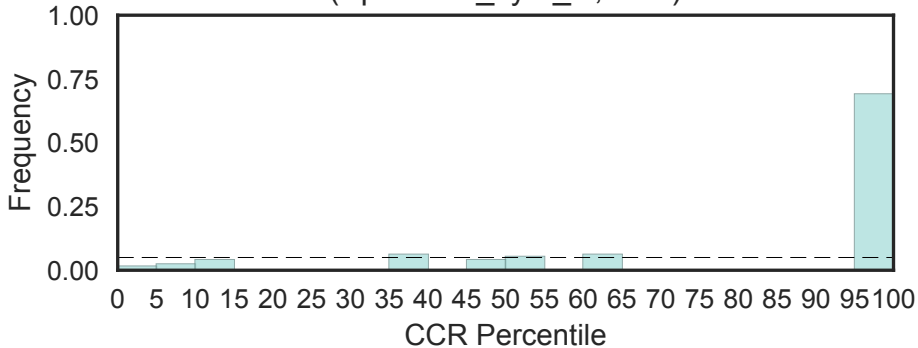

Spermine/spermidine synthase domain  
(Spermine\_synth, N=2)

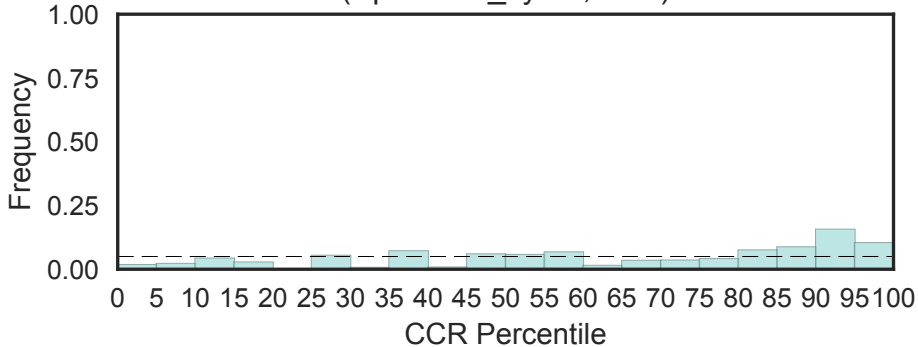

Neuropeptide secretory protein family, NPQ, spexin  
(Spexin, N=1)

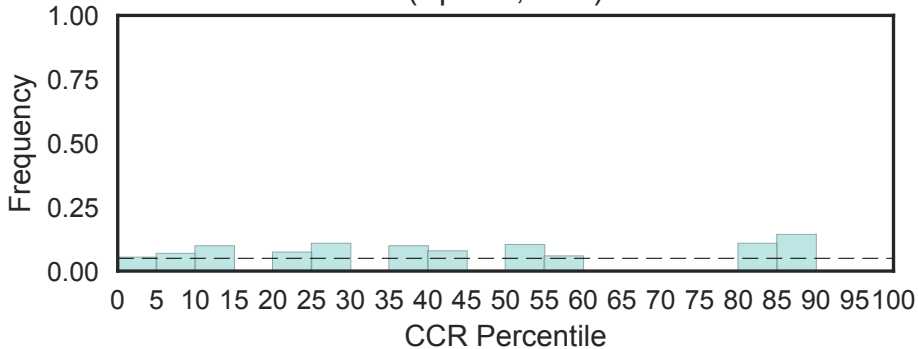

Spin/Ssty Family  
(Spin-Ssty, N=3)

Fisher's OR: 36; Bonferroni p-val: 0.0712

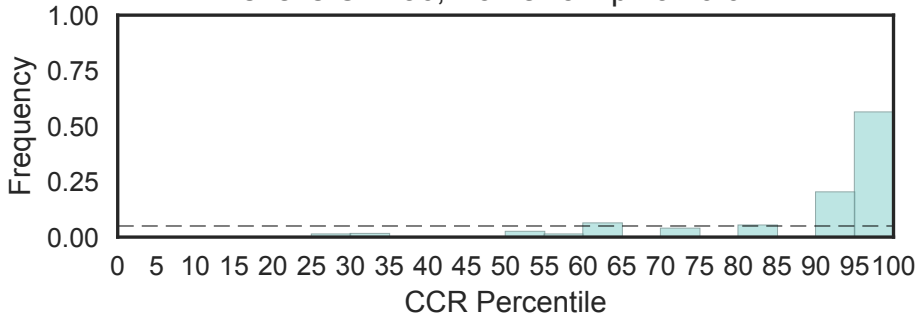

Chromosome segregation protein Spc25  
(Spindle\_Spc25, N=1)

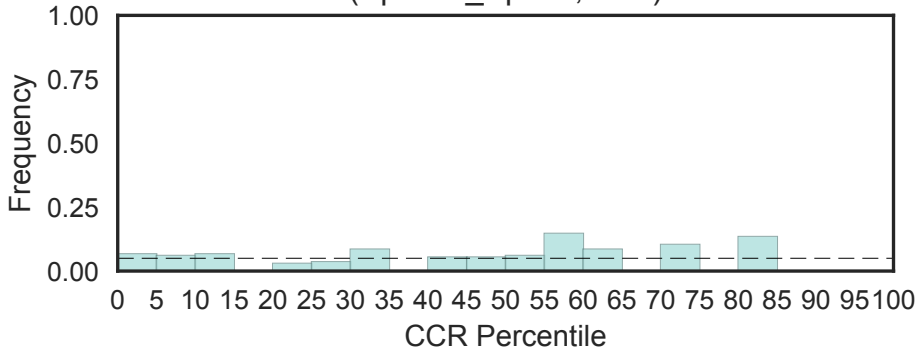

Stage II sporulation protein E (SpolIE)  
(SpolIE, N=2)

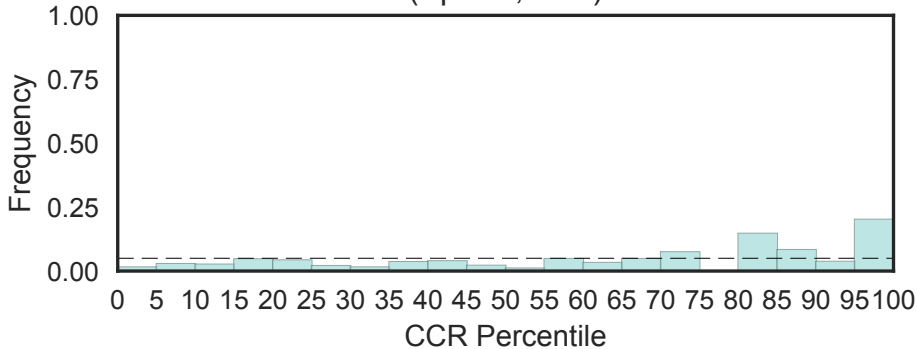

SpoU rRNA Methylase family  
(SpoU\_methylase, N=3)  
Fisher's OR: 0; Bonferroni p-val: 1

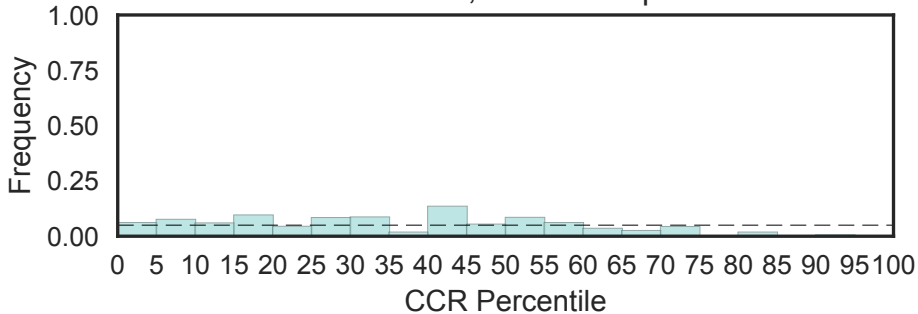



RNA 2'-O ribose methyltransferase substrate binding  
(SpoU\_sub\_bind, N=1)

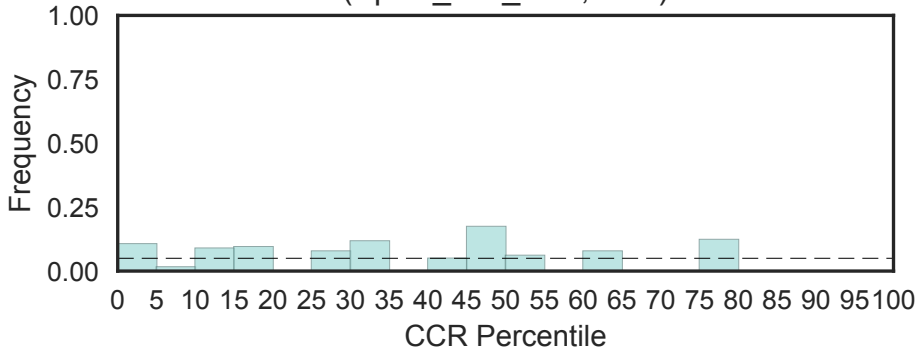

Spondin\_N  
(Spond\_N, N=1)

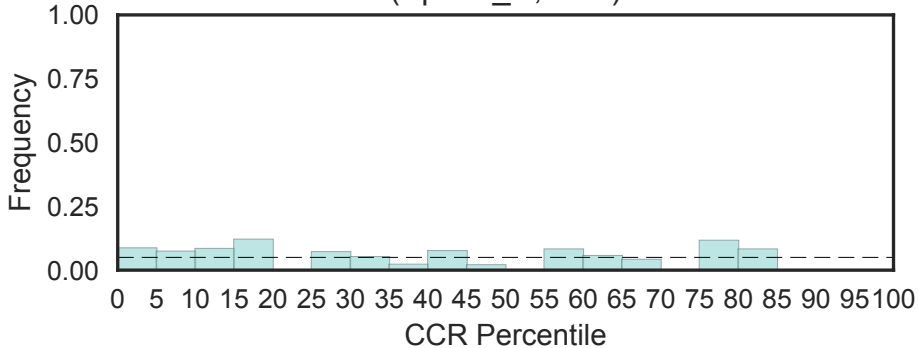

Thyroid hormone-inducible hepatic protein Spot 14  
(Spot\_14, N=1)

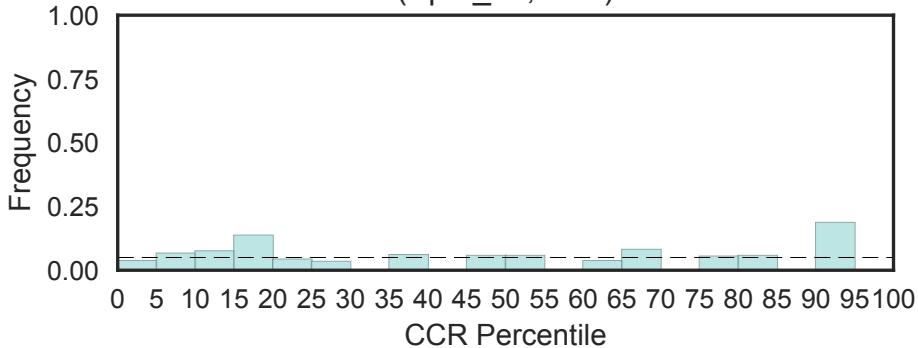

# Secreted phosphoprotein 24 (Spp-24) cystatin-like domain (Spp-24, N=2)

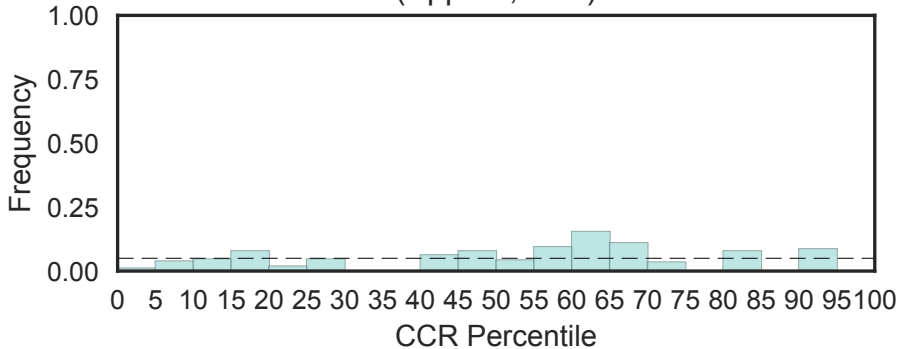

SprT-like family  
(SprT-like, N=1)

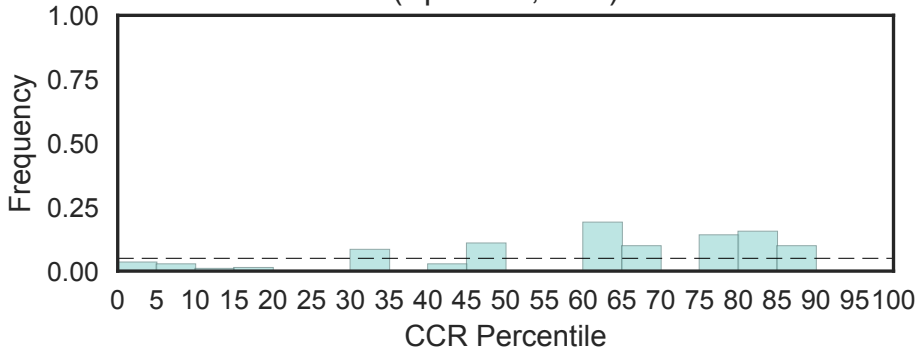

Sprouty protein (Spry)  
(Sprouty, N=6)

Fisher's OR: 1.04; Bonferroni p-val: 1

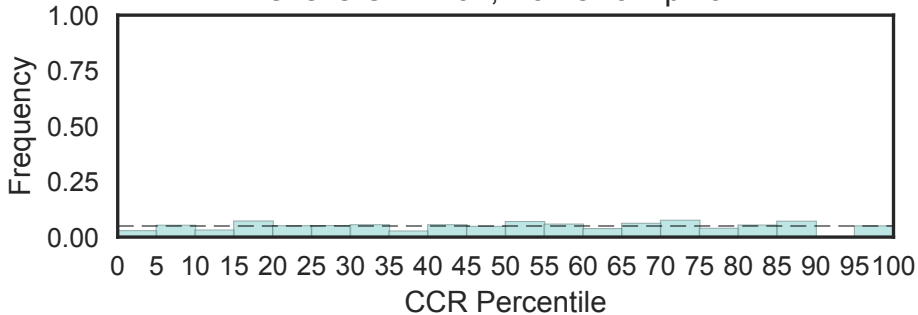

Spt20 family  
(Spt20, N=2)

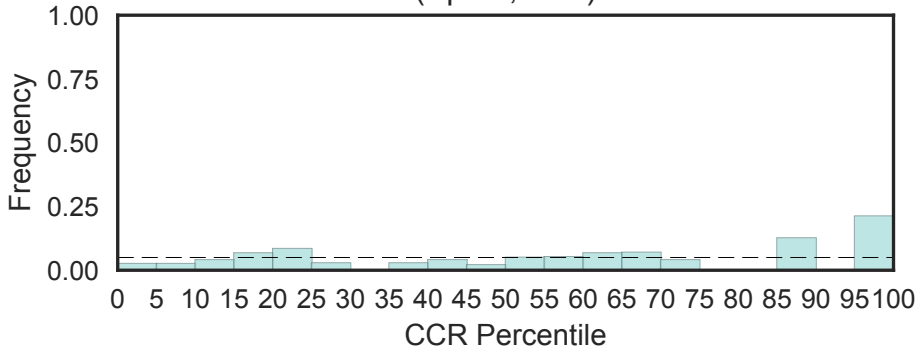

Spt4/RpoE2 zinc finger  
(Spt4, N=1)

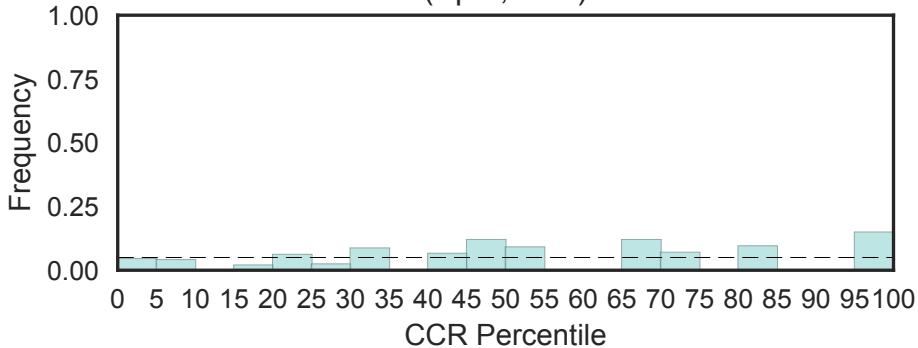



Early transcription elongation factor of RNA pol II, NGN section  
(Spt5-NGN, N=1)

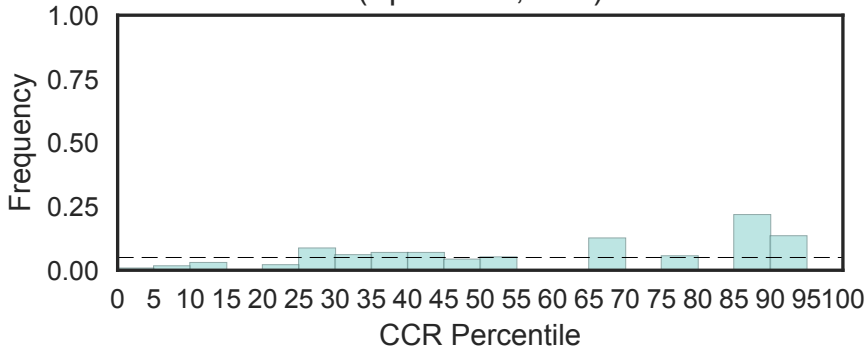

Spt5 transcription elongation factor, acidic N-terminal  
(Spt5\_N, N=1)

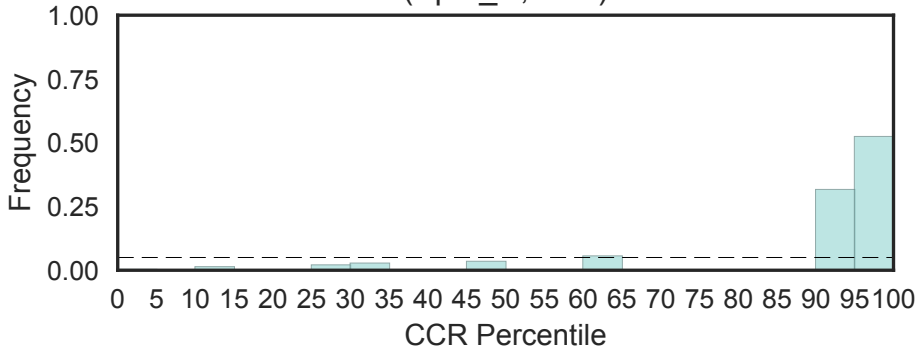

Cell cycle regulatory protein  
(Spy1, N=11)

Fisher's OR: 1.76; Bonferroni p-val: 1

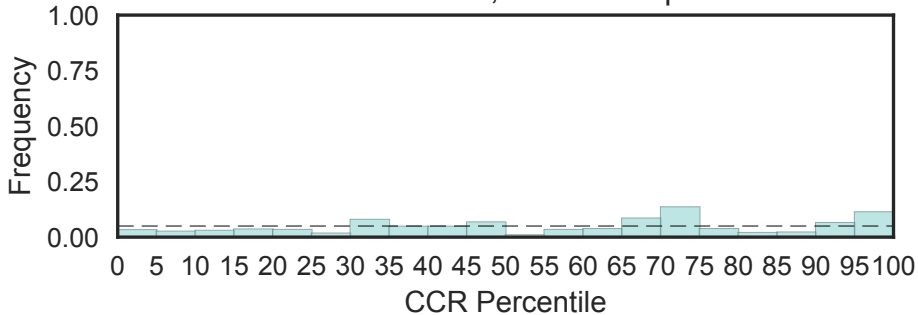

# Srg family chemoreceptor (Srg, N=1)

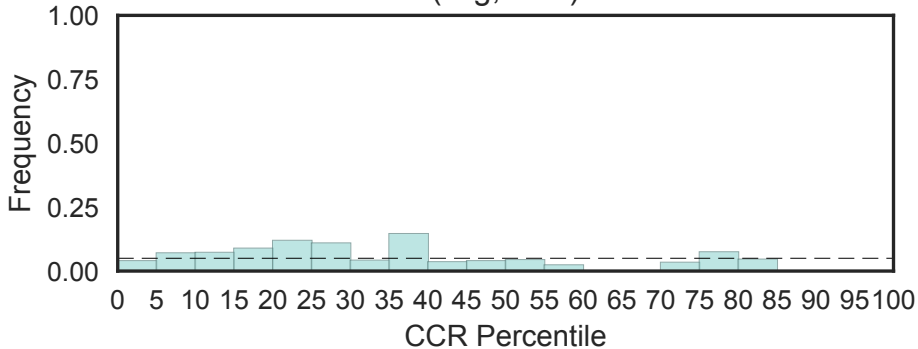

Ssl1-like  
(Ssl1, N=3)

Fisher's OR: 9.01; Bonferroni p-val: 1

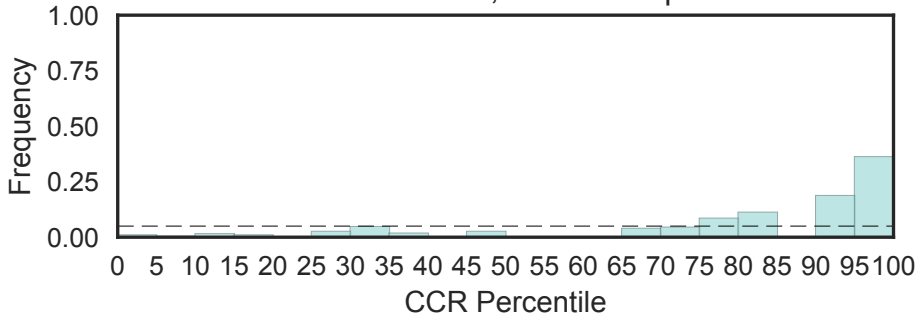

Ssu72-like protein  
(Ssu72, N=1)

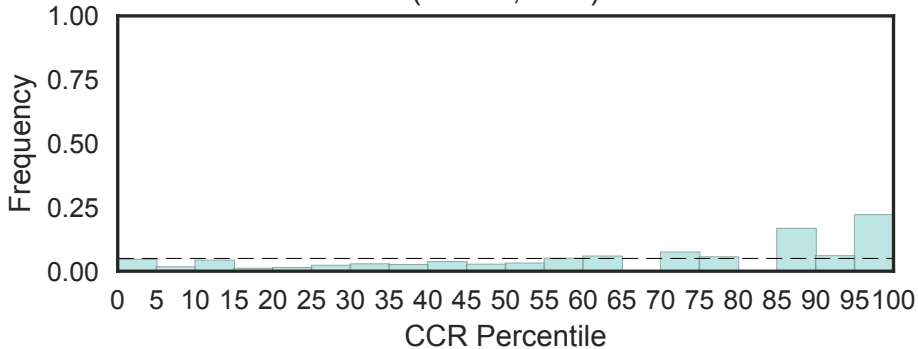

Stanniocalcin family  
(Stanniocalcin, N=2)

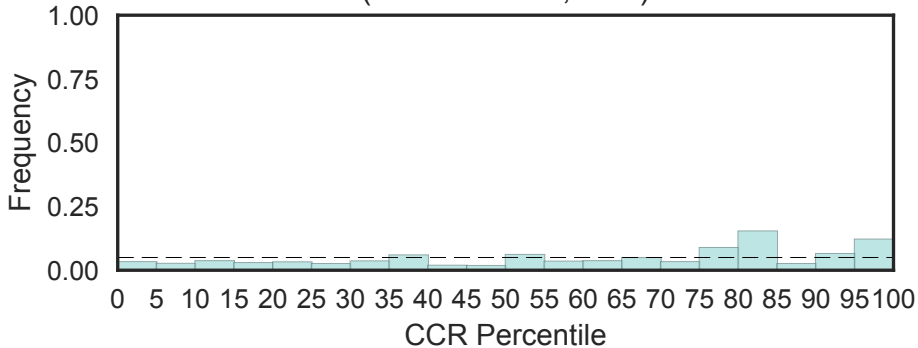

# Statherin (Statherin, N=1)

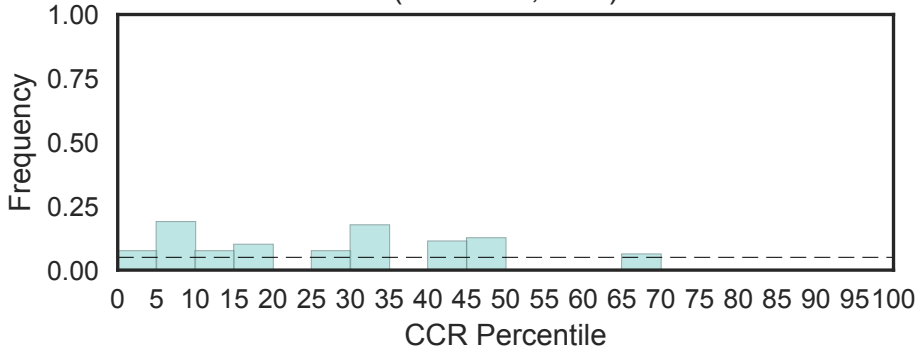



Stathmin family  
(Stathmin, N=5)

Fisher's OR: 3.92; Bonferroni p-val: 1

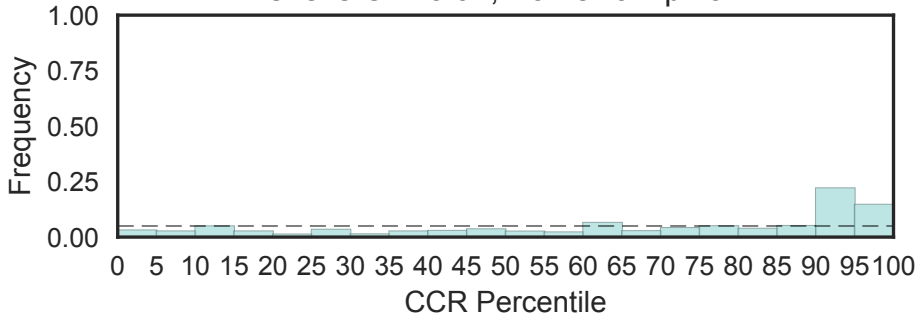

Staufen C-terminal domain  
(Staufen\_C, N=4)

Fisher's OR: 1.33; Bonferroni p-val: 1

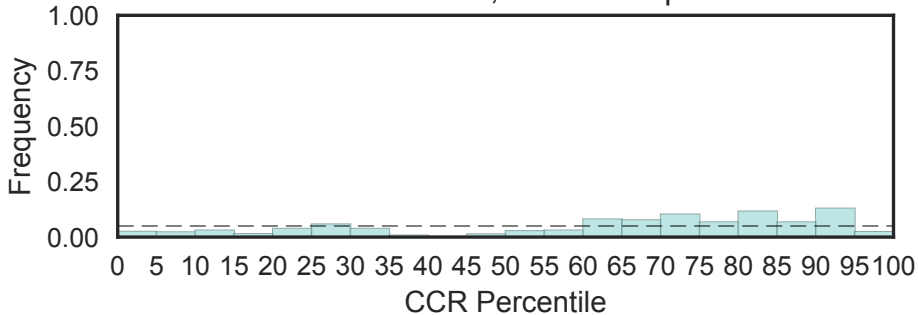

Stealth protein CR1, conserved region 1  
(Stealth\_CR1, N=1)

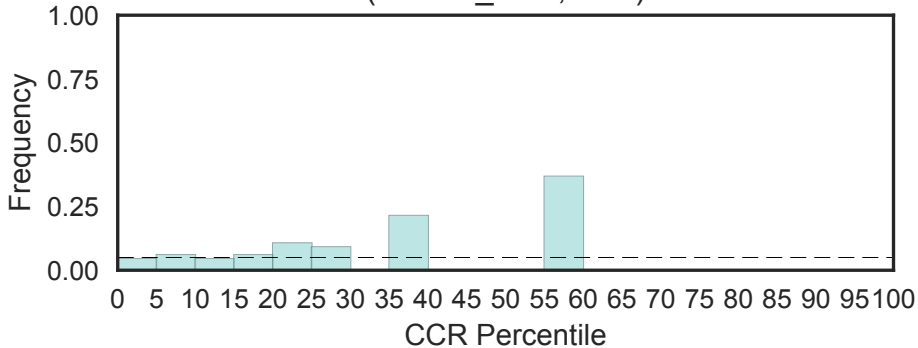

Stealth protein CR2, conserved region 2  
(Stealth\_CR2, N=1)

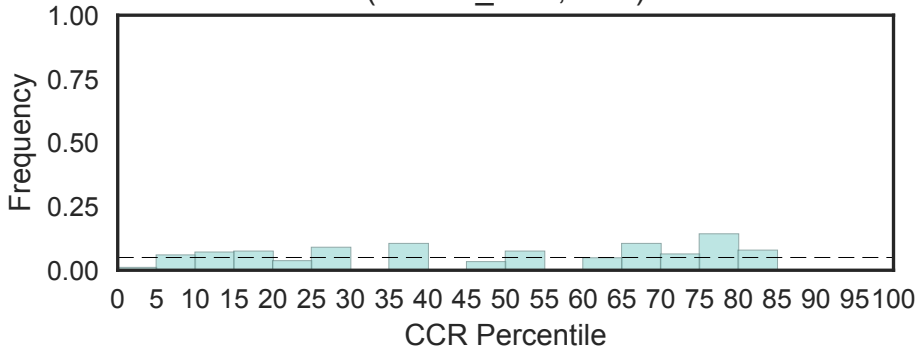

Stealth protein CR3, conserved region 3  
(Stealth\_CR3, N=1)

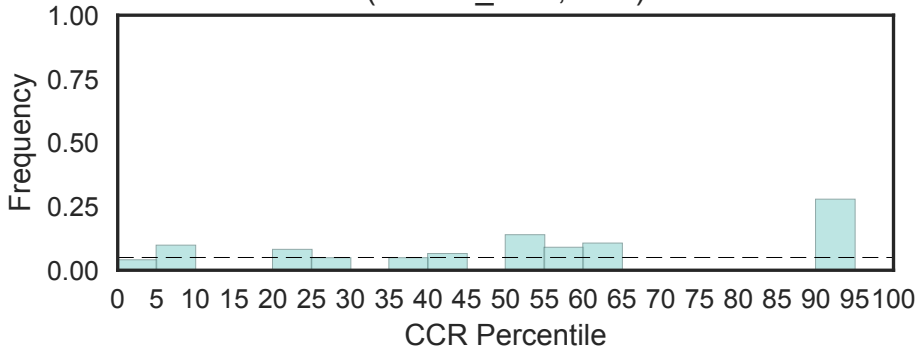

Stealth protein CR4, conserved region 4  
(Stealth\_CR4, N=1)

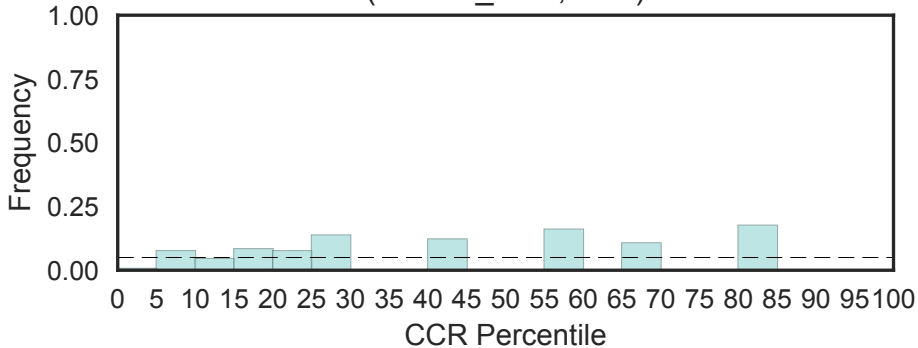

Male sterility protein  
(Sterile, N=2)

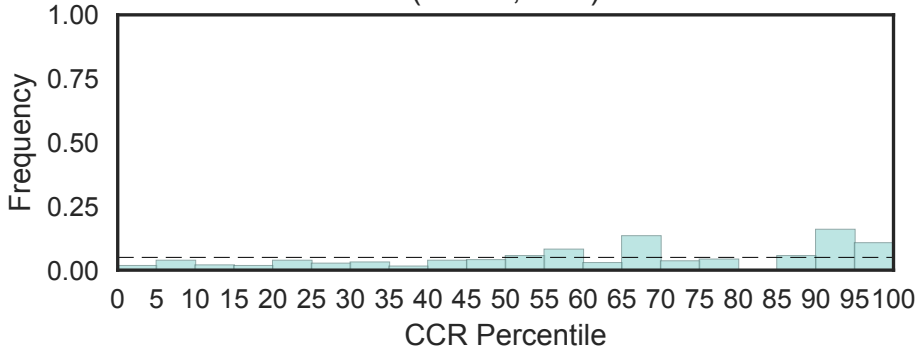

3-oxo-5-alpha-steroid 4-dehydrogenase  
(Steroid\_dh, N=4)

Fisher's OR: 0; Bonferroni p-val: 1

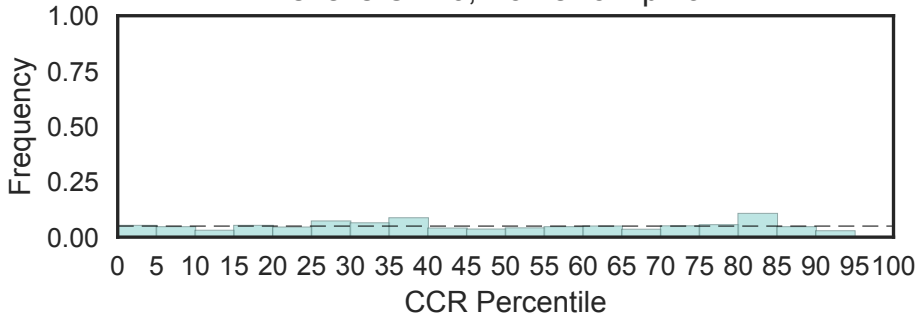



Sterol-sensing domain of SREBP cleavage-activation  
(Sterol-sensing, N=10)

Fisher's OR: 0.599; Bonferroni p-val: 1

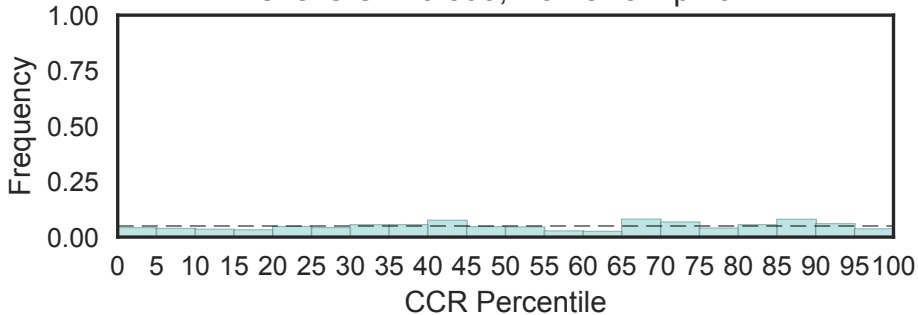

# Telomere regulation protein Stn1 (Stn1, N=1)

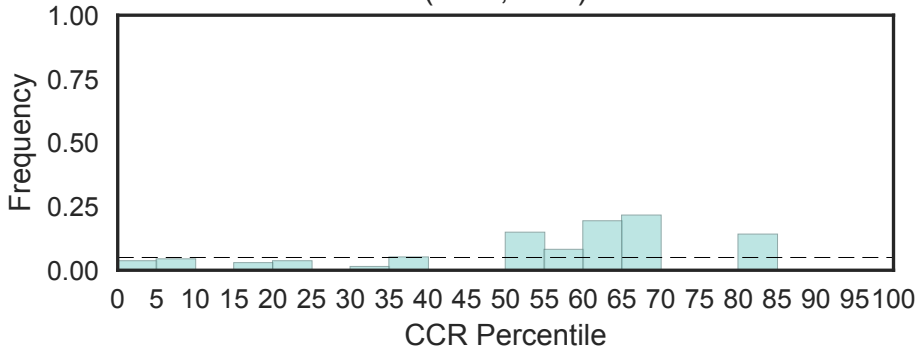

Stonin 2  
(Stonin2\_N, N=1)

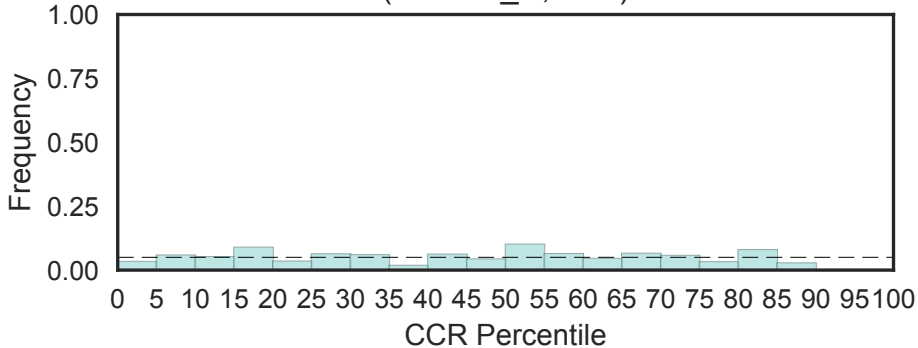

Winged helix Storkhead-box1 domain  
(Stork\_head, N=2)

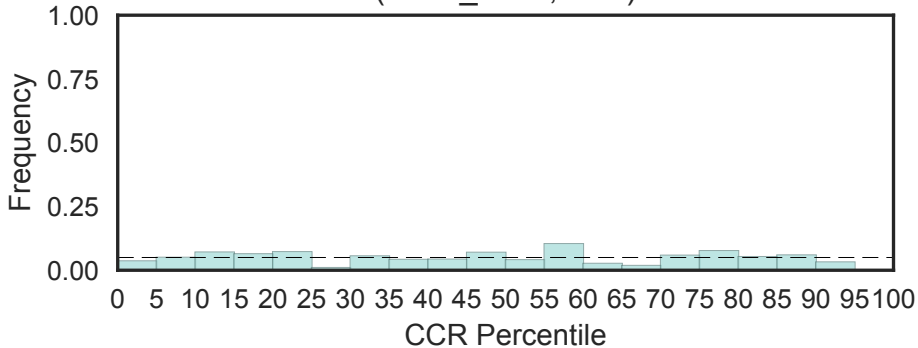

# Strictosidine synthase

(Str\_synth, N=3)

Fisher's OR: 1.13; Bonferroni p-val: 1

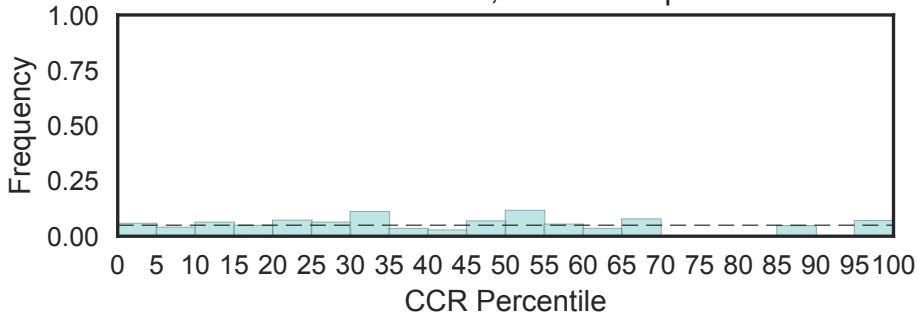

Strabismus protein  
(Strabismus, N=2)

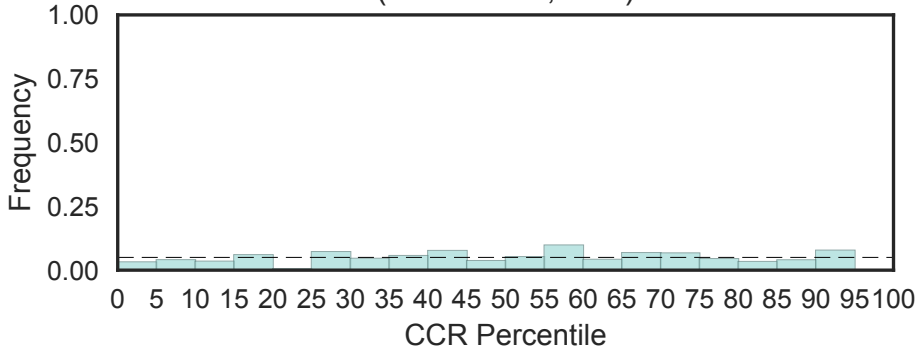

Striatin family  
(Striatin, N=3)

Fisher's OR: 3.34; Bonferroni p-val: 1

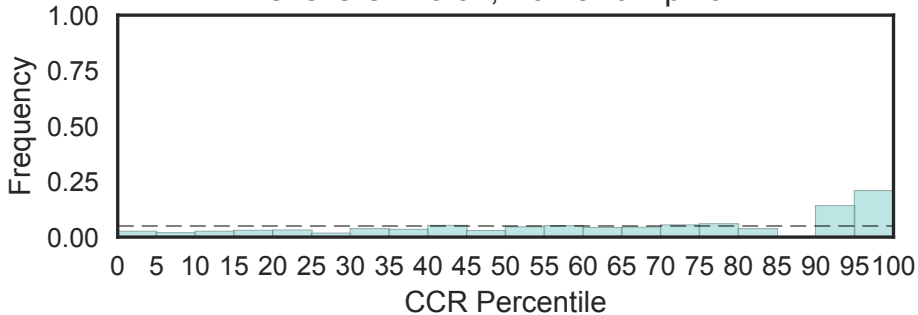

# Hereditary spastic paraplegia protein strumpellin (Strumpellin, N=1)

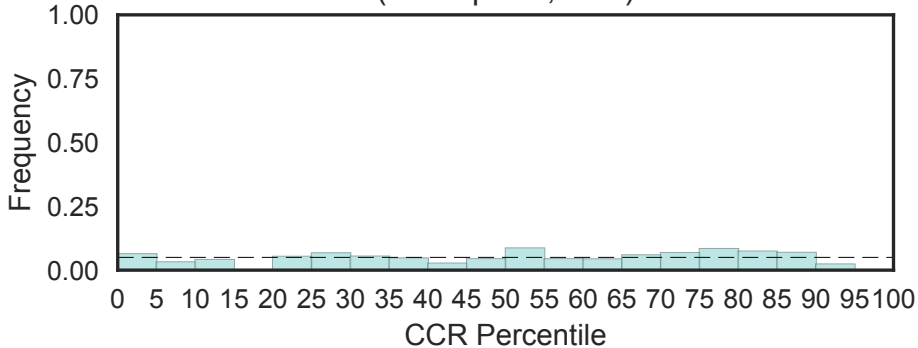



Telomere recombination  
(Sua5\_yciO\_yrdC, N=1)

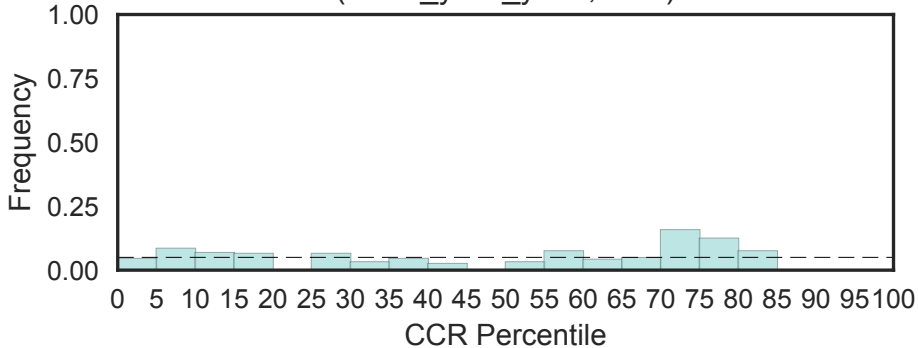

Succinyl-CoA ligase like flavodoxin domain  
(Succ\_CoA\_lig, N=1)

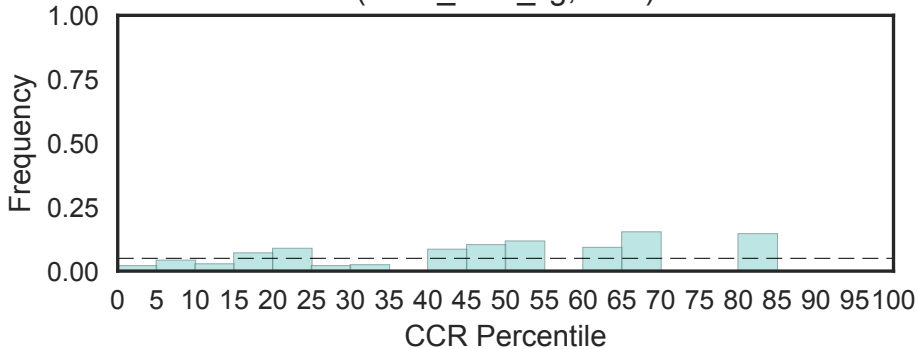

Suppressor of forked protein (Suf)  
(Suf, N=3)

Fisher's OR: 2.01; Bonferroni p-val: 1

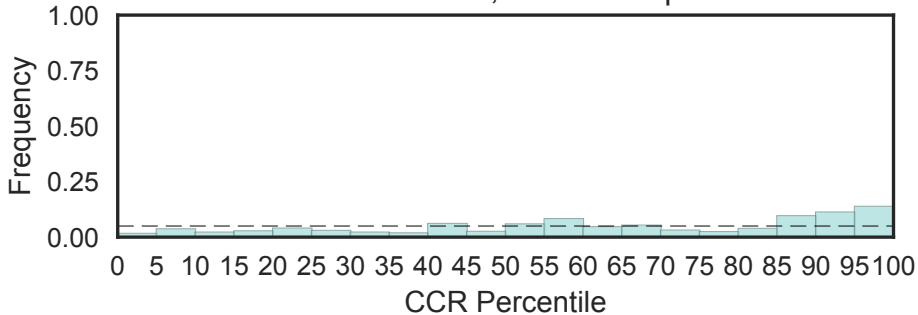

Sugar (and other) transporter  
(Sugar\_tr, N=63)

Fisher's OR: 0.43; Bonferroni p-val: 0.00283

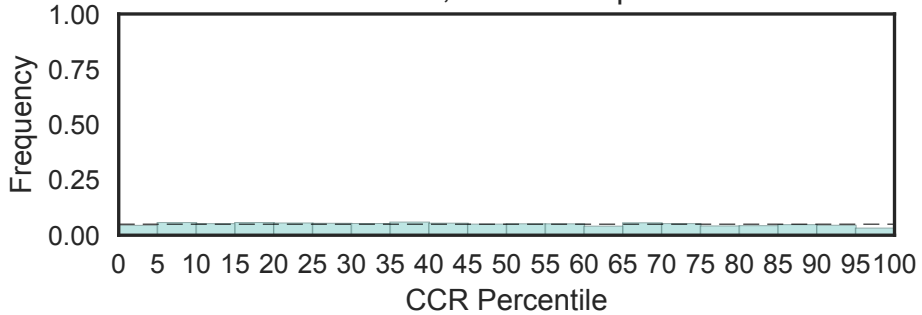

Sugar transport protein  
(Sugar\_transport, N=1)

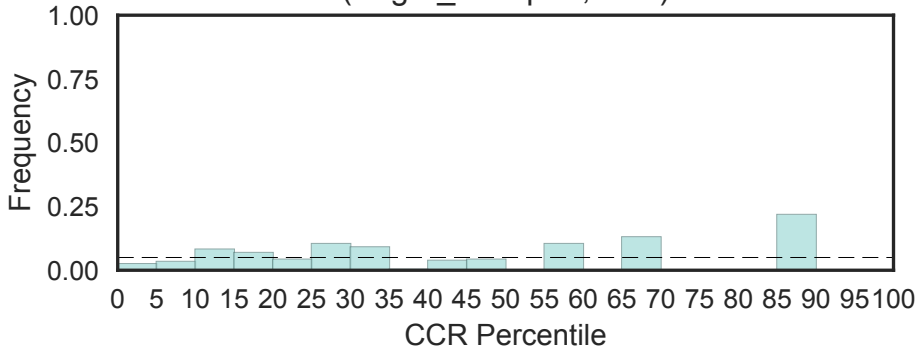

# Sulfatase

(Sulfatase, N=12)

Fisher's OR: 0.0736; Bonferroni p-val: 0.279

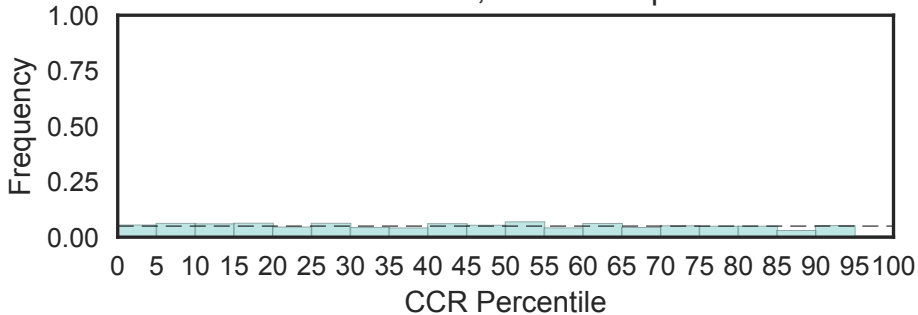

C-terminal region of aryl-sulfatase  
(Sulfatase\_C, N=3)

Fisher's OR: 0; Bonferroni p-val: 1

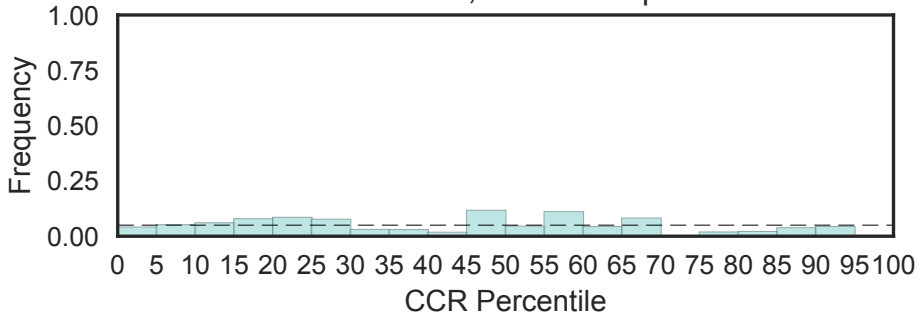

Sulfate permease family  
(Sulfate\_transp, N=15)

Fisher's OR: 0.453; Bonferroni p-val: 1

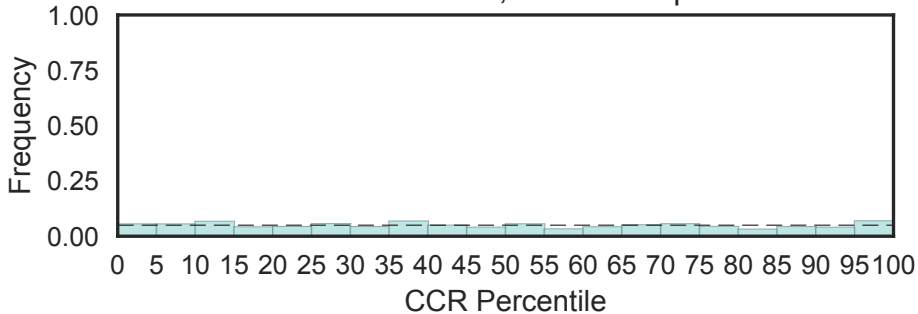



Sulfotransferase domain  
(Sulfotransfer\_1, N=35)

Fisher's OR: 0.582; Bonferroni p-val: 1

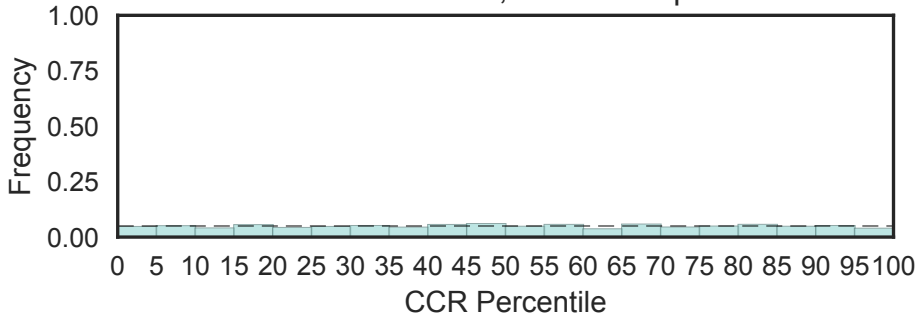

Sulfotransferase family  
(Sulfotransfer\_2, N=12)

Fisher's OR: 0.47; Bonferroni p-val: 1

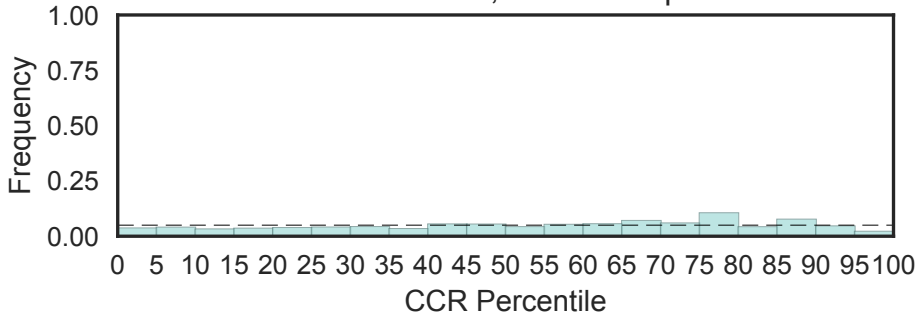

Sulfotransferase family  
(Sulfotransfer\_3, N=23)

Fisher's OR: 0.326; Bonferroni p-val: 1

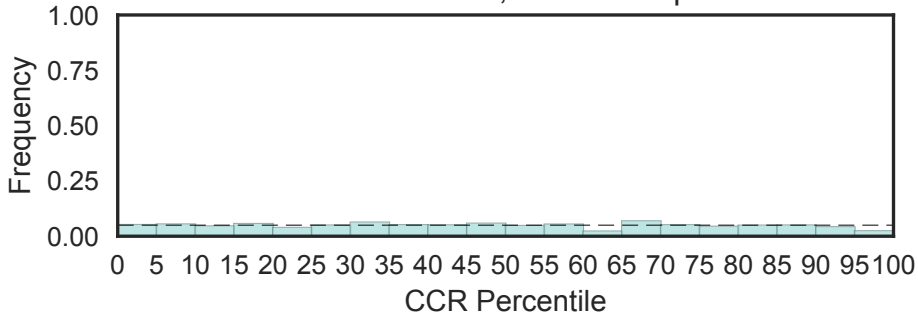

Adenomatous polyposis coli tumour suppressor protein  
(Suppressor\_APC, N=4)

Fisher's OR: 0; Bonferroni p-val: 1

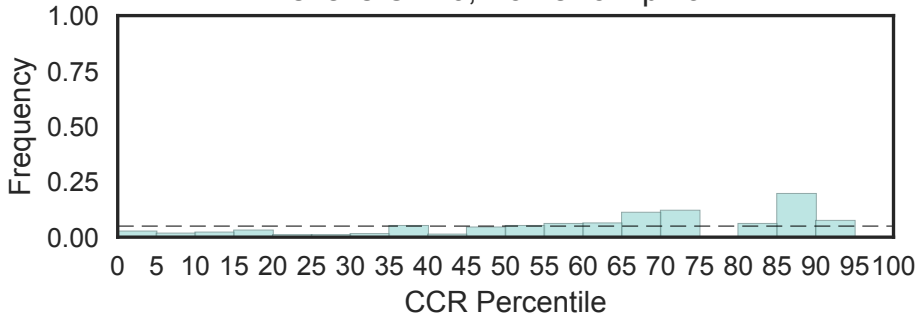

Lung surfactant protein D coiled-coil trimerisation  
(Surfac\_D-trimer, N=1)

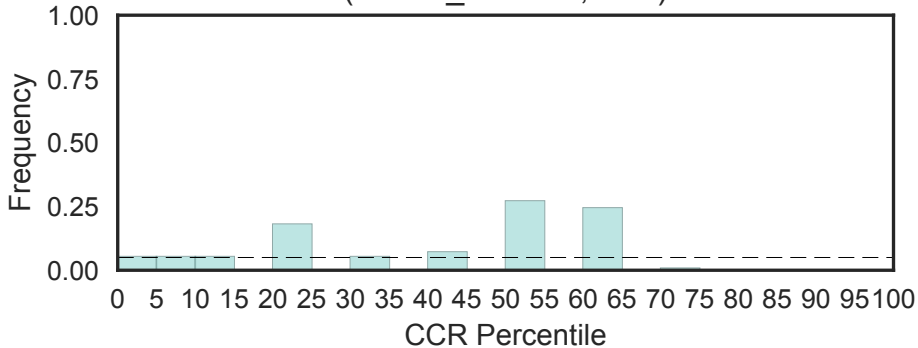

Surp module  
(Surp, N=9)

Fisher's OR: 2.92; Bonferroni p-val: 1

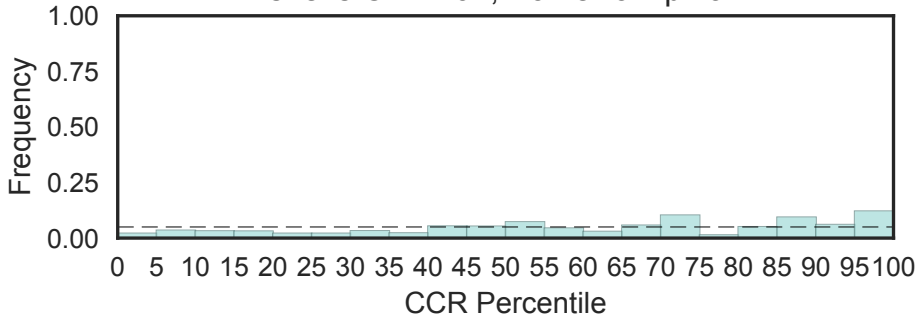

Sushi repeat (SCR repeat)  
(Sushi, N=329)

Fisher's OR: 0.382; Bonferroni p-val: 0.00226

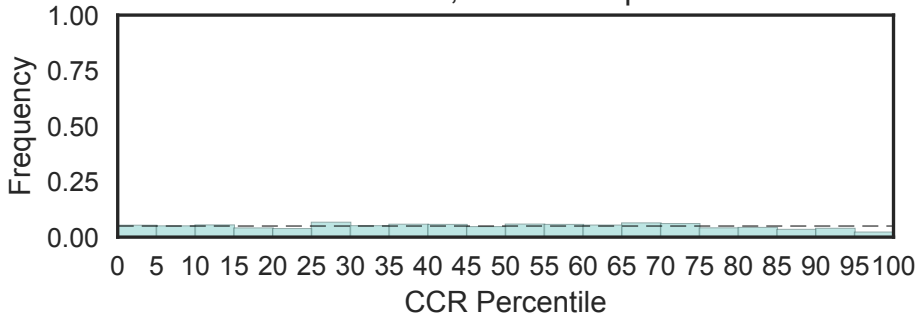

Beta-2-glycoprotein-1 fifth domain  
(Sushi\_2, N=1)

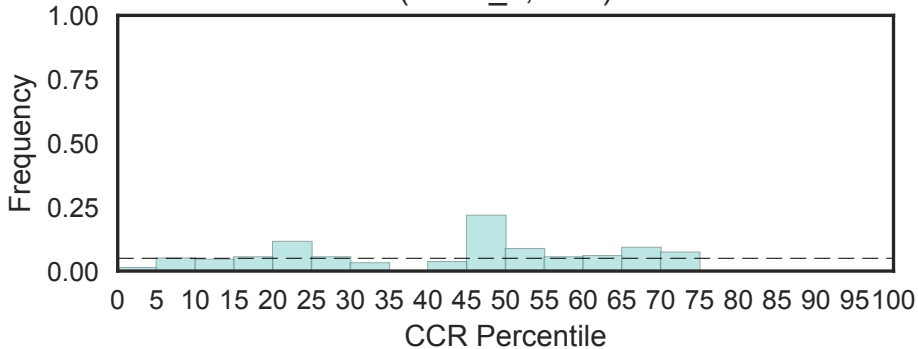



# Replication Fork Protection Component Swi3 (Swi3, N=1)

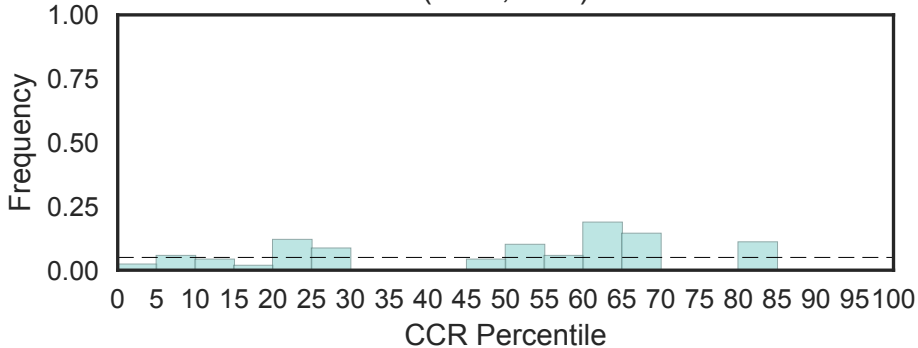

Swi5  
(Swi5, N=1)

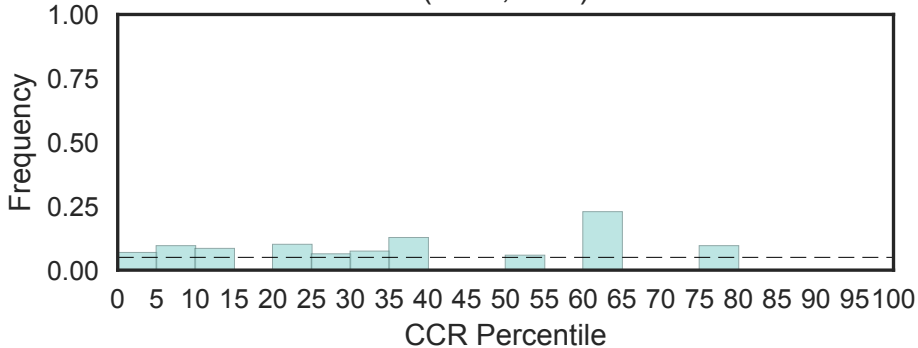

Sybindin-like family  
(Sybindin, N=3)

Fisher's OR: 0.422; Bonferroni p-val: 1

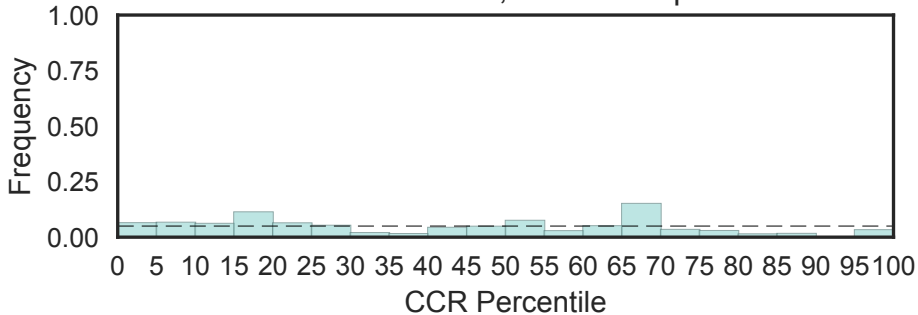

# Sacl homology domain

(Syja\_N, N=5)

Fisher's OR: 0.774; Bonferroni p-val: 1

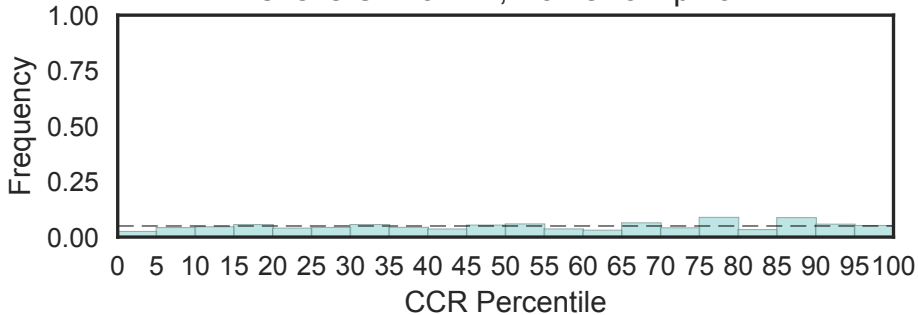

Symplekin tight junction protein C terminal  
(Symplekin\_C, N=1)

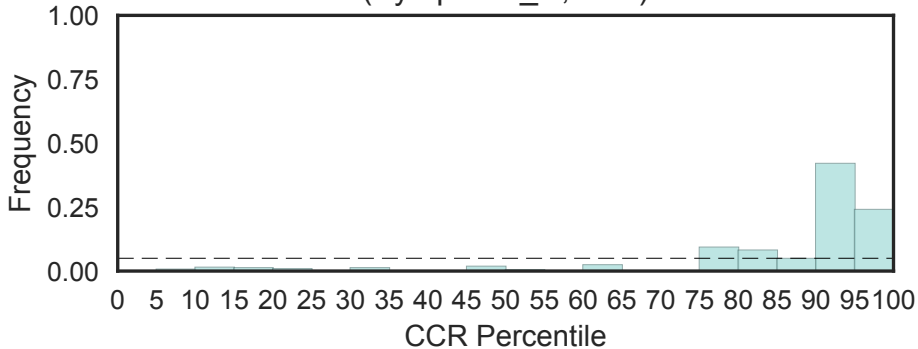

Ras-induced vulval development antagonist  
(SynMuv\_product, N=1)

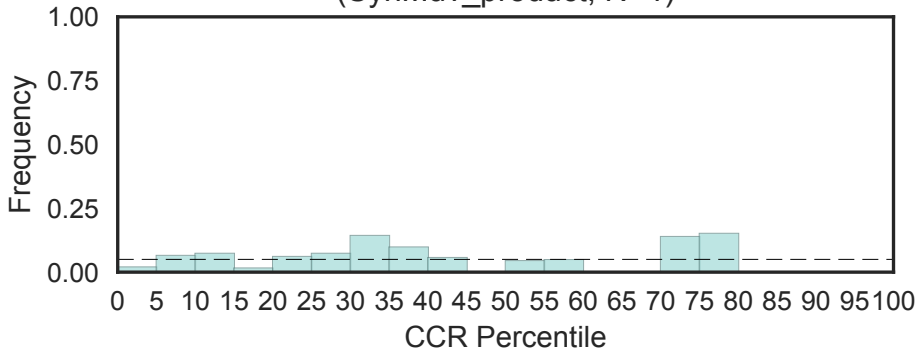

Synaphin protein  
(Synaphin, N=4)

Fisher's OR: 0.584; Bonferroni p-val: 1

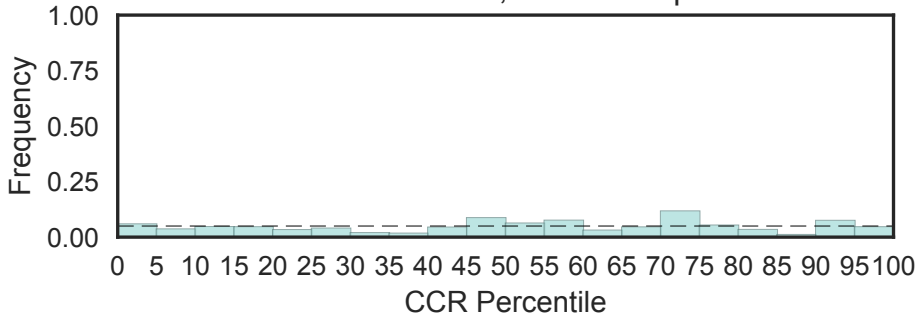

Synapsin, N-terminal domain  
(Synapsin, N=1)

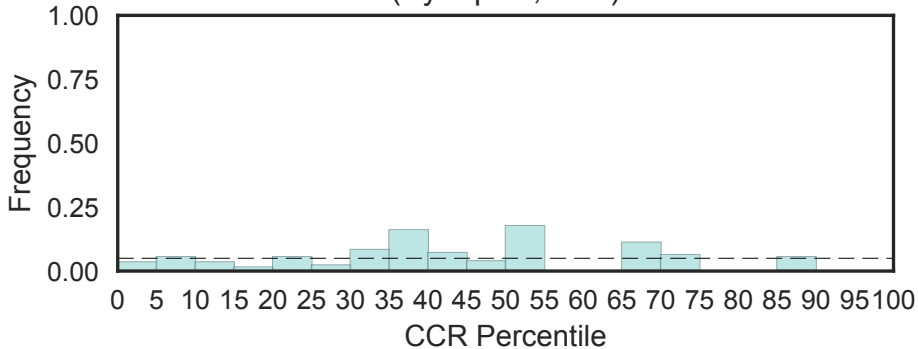



Synapsin, ATP binding domain  
(Synapsin\_C, N=3)

Fisher's OR: 0.496; Bonferroni p-val: 1

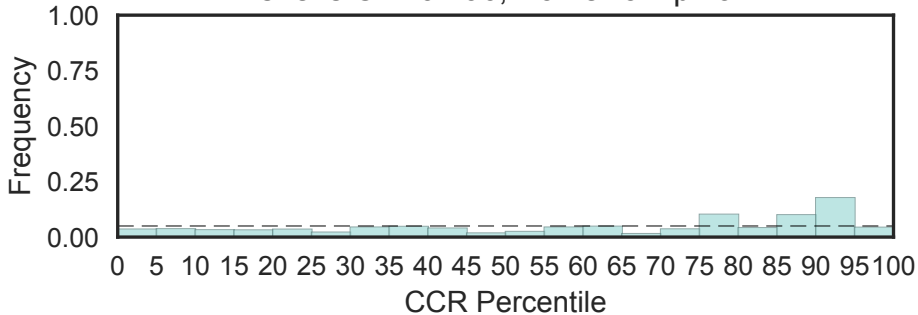

# Synapsin N-terminal (Synapsin\_N, N=1)

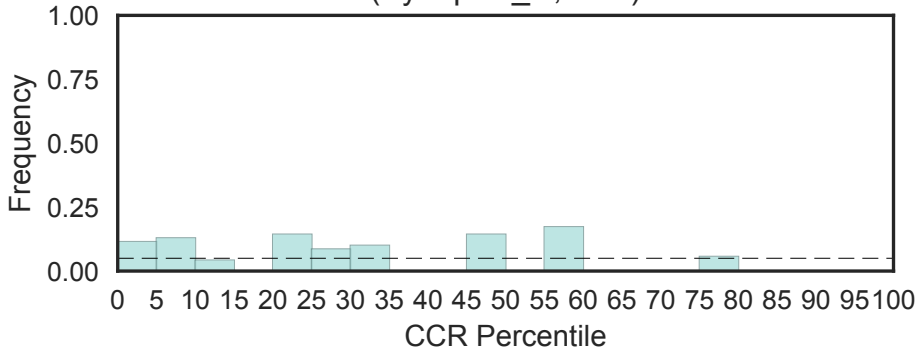

Synaptobrevin  
(Synaptobrevin, N=9)

Fisher's OR: 2.33; Bonferroni p-val: 1

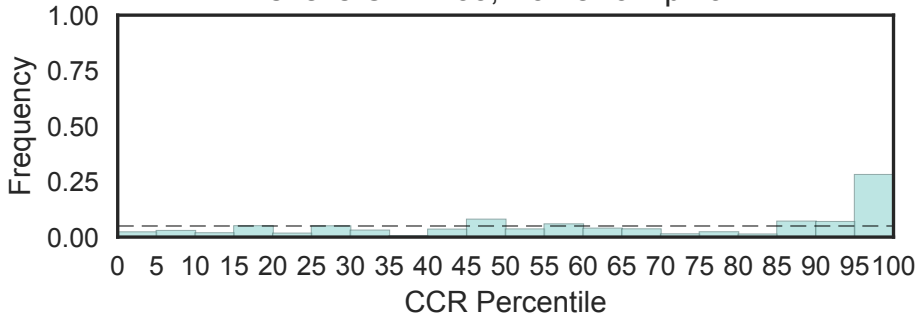

# Synaptonemal complex central element protein 3 (Synaptonemal\_3, N=1)

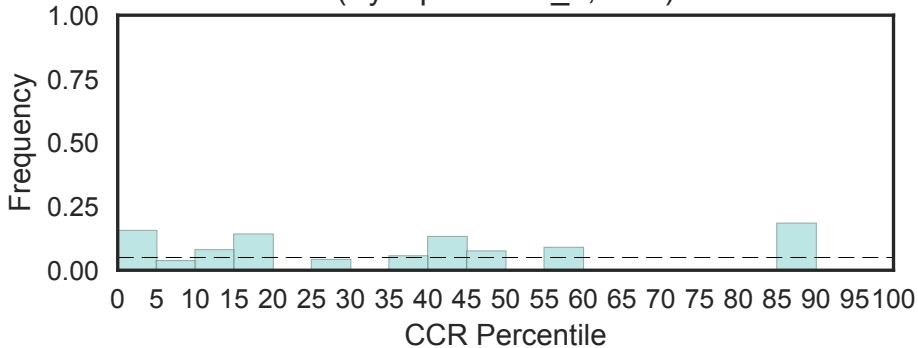

# Syncollin (Syncollin, N=1)

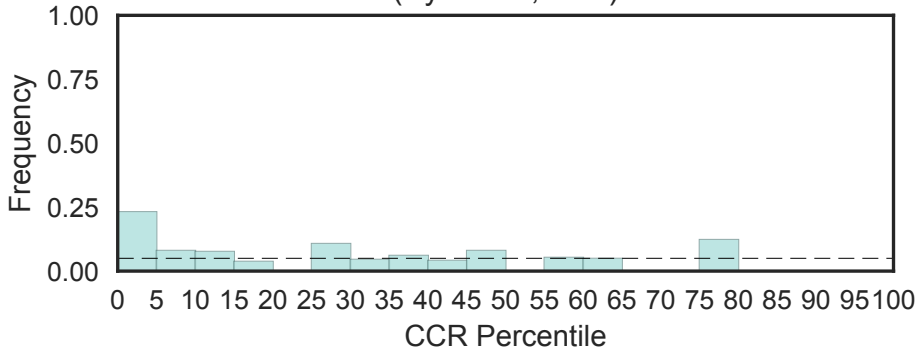

Syndecan domain  
(Syndecan, N=7)

Fisher's OR: 0; Bonferroni p-val: 1

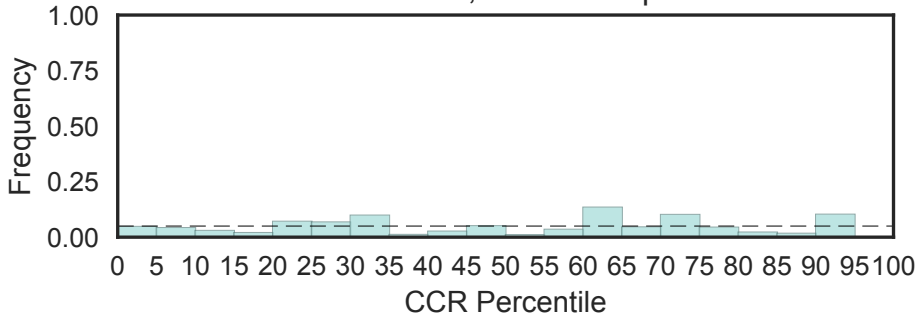

# Golgi-localised syntaxin-1-binding clamp (Syntaphilin, N=2)

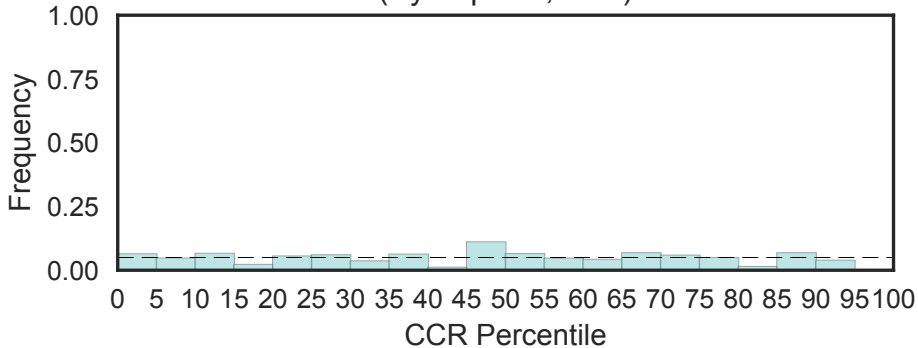

# Syntaxin

(Syntaxin, N=10)

Fisher's OR: 0.868; Bonferroni p-val: 1

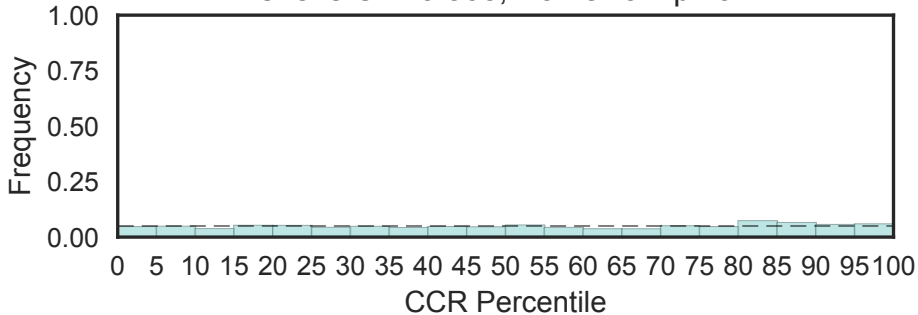



SNARE-complex protein Syntaxin-18 N-terminus  
(Syntaxin-18\_N, N=1)

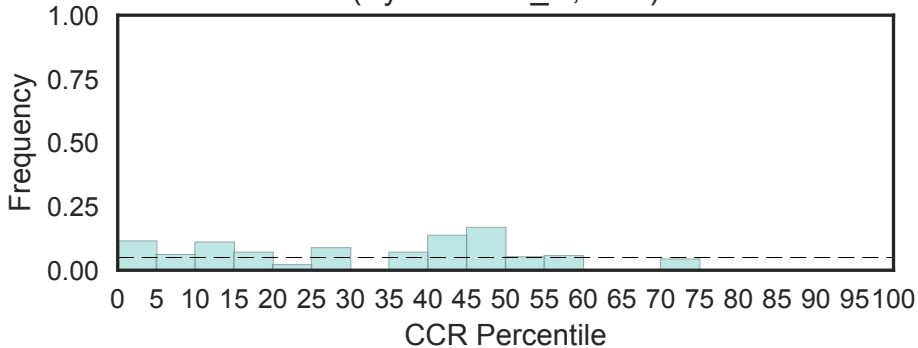

Syntaxin-5 N-terminal, Sly1p-binding domain  
(Syntaxin-5\_N, N=1)

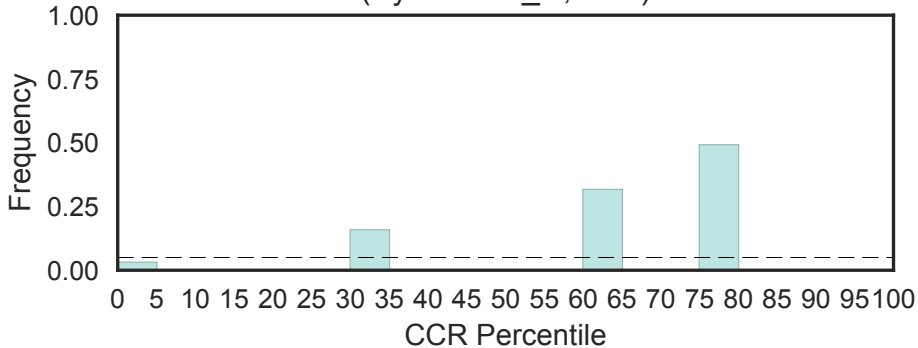

Syntaxin 6, N-terminal  
(Syntaxin-6\_N, N=2)

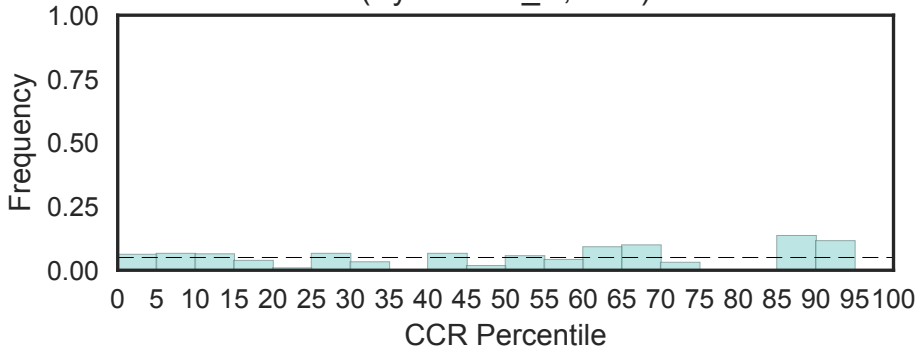

Syntaxin-like protein  
(Syntaxin\_2, N=8)

Fisher's OR: 0.702; Bonferroni p-val: 1

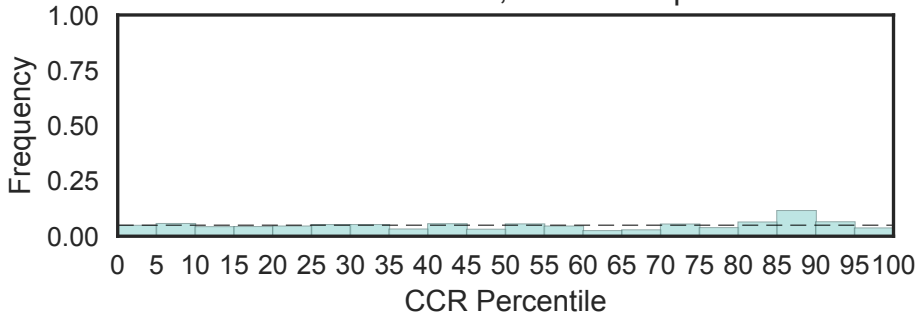

# Synuclein

(Synuclein, N=3)

Fisher's OR: 0.772; Bonferroni p-val: 1

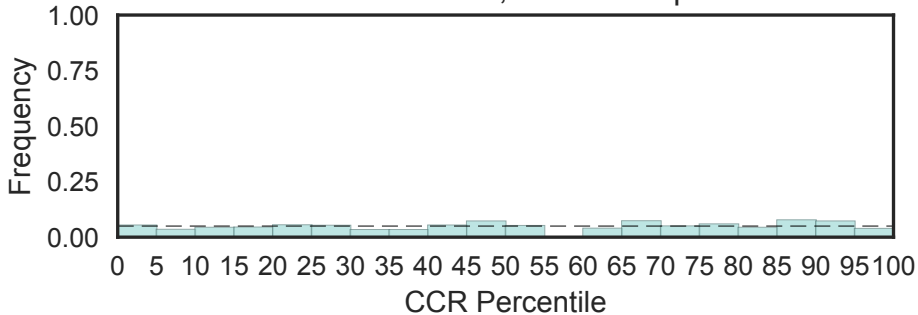

T-box  
(T-box, N=16)

Fisher's OR: 2.74; Bonferroni p-val: 0.523

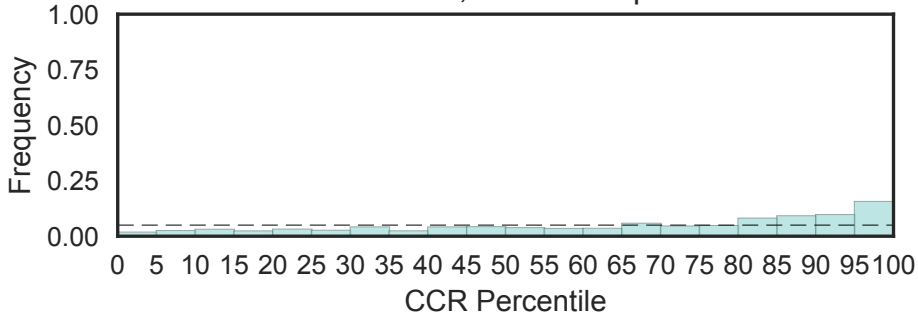

T-box transcription factor-associated  
(T-box\_assoc, N=2)

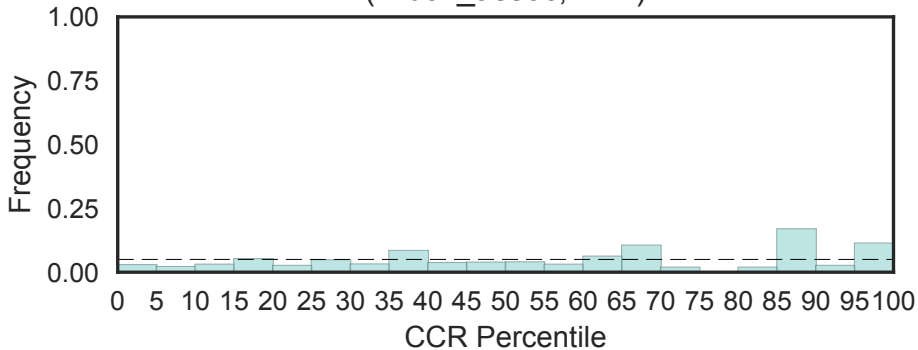

Type II secretion system (T2SS), protein K  
(T2SSK, N=1)

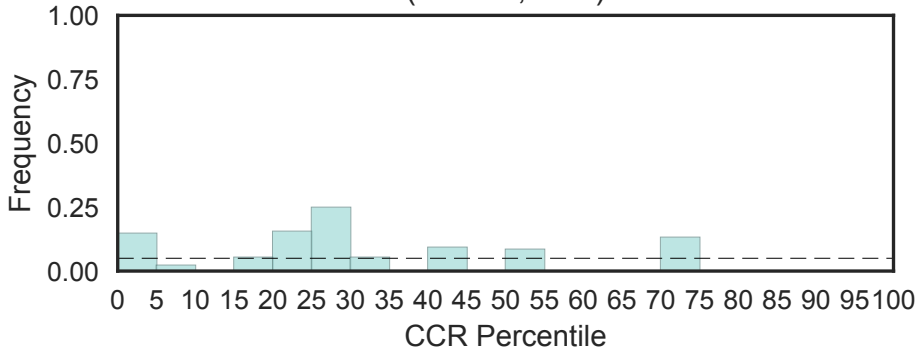



Iodothyronine deiodinase  
(T4\_deiodinase, N=4)

Fisher's OR: 0.386; Bonferroni p-val: 1

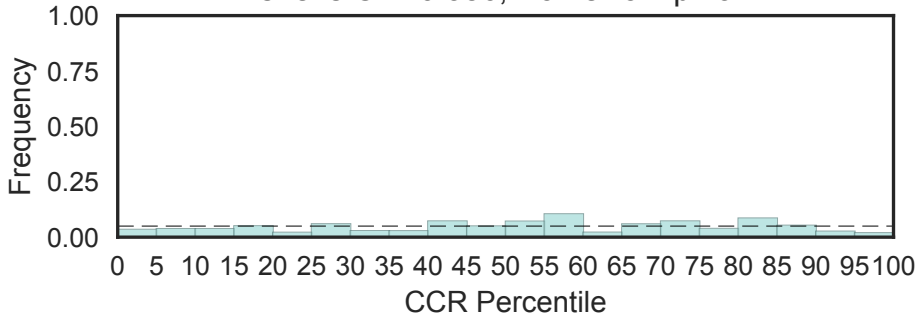

Transforming acidic coiled-coil-containing protein (TACC)  
(TACC, N=3)

Fisher's OR: 2.28; Bonferroni p-val: 1

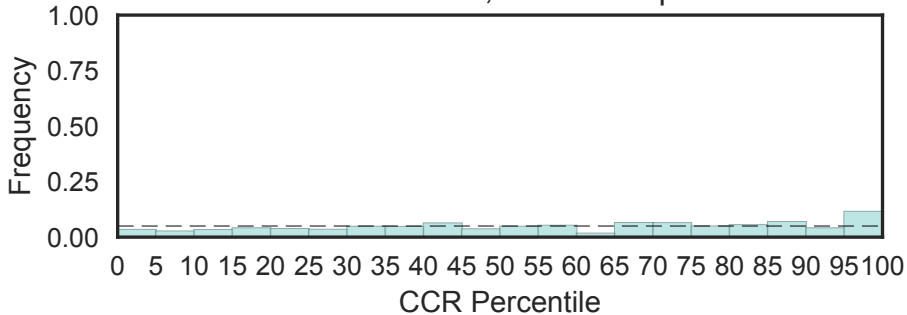

TAC1, cysteine-rich domain  
(TAC1-CRD2, N=2)

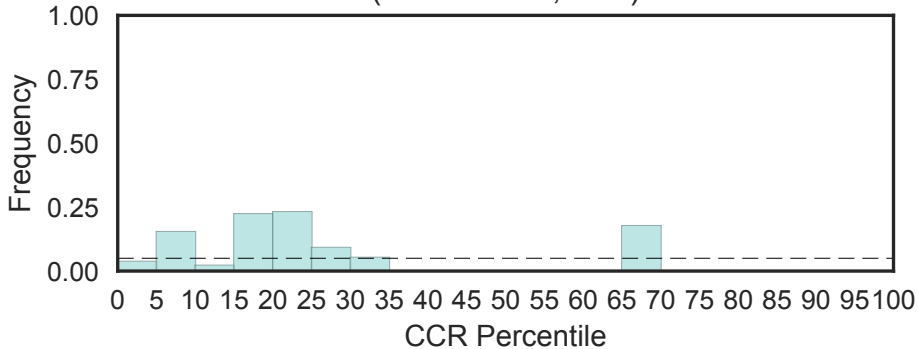

TATA box binding protein associated factor (TAF)  
(TAF, N=16)

Fisher's OR: 0; Bonferroni p-val: 1

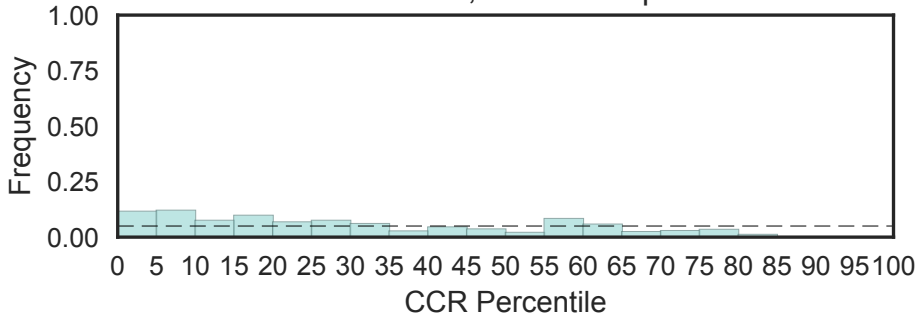

TATA box-binding protein-associated factor 1D  
(TAF1D, N=1)

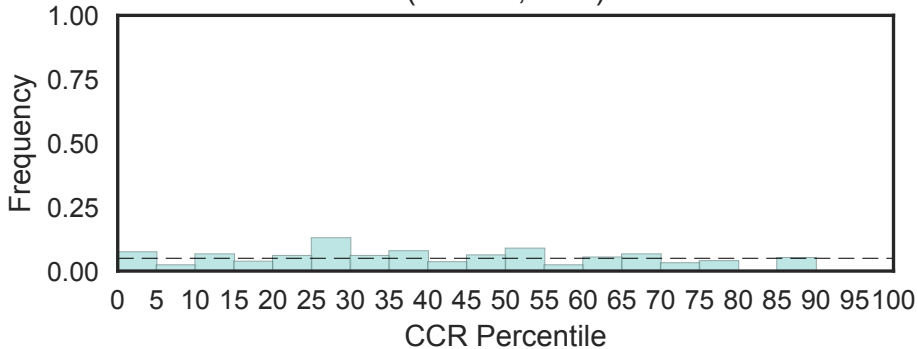

TAF RNA Polymerase I subunit A  
(TAF1\_subA, N=1)

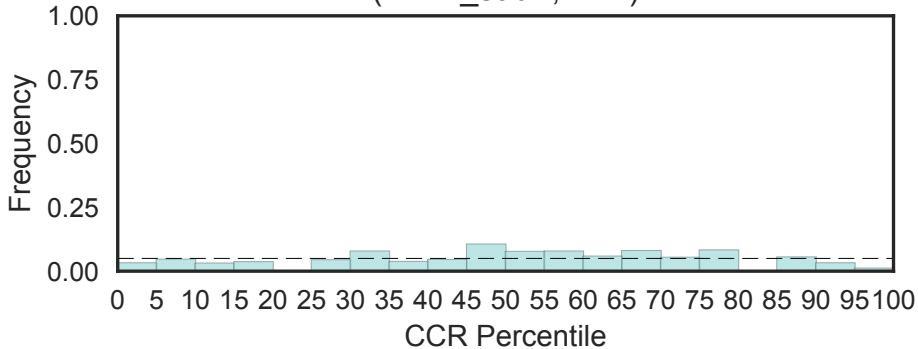

Transcription initiation factor TFIIID component TAF4 family  
(TAF4, N=2)

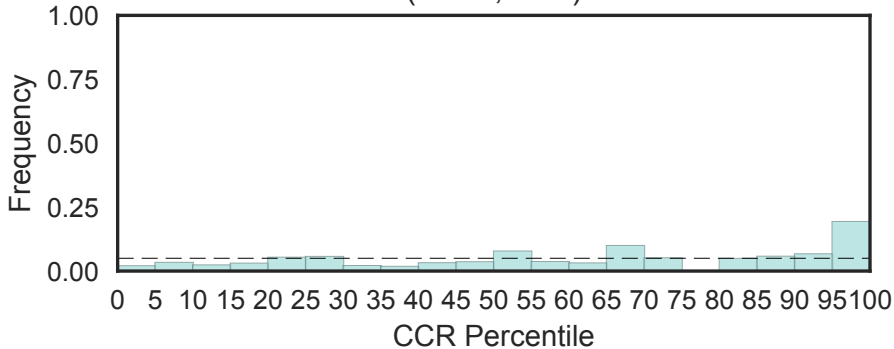

TAF6 C-terminal HEAT repeat domain  
(TAF6\_C, N=3)

Fisher's OR: 3.33; Bonferroni p-val: 1

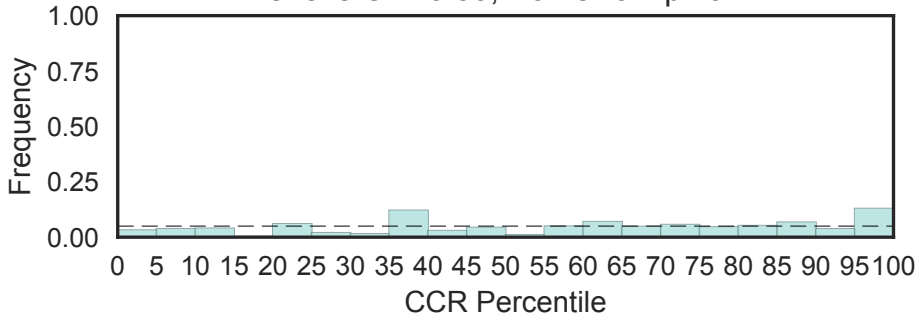



Transcription factor TFIID complex subunit 8 C-term  
(TAF8\_C, N=1)

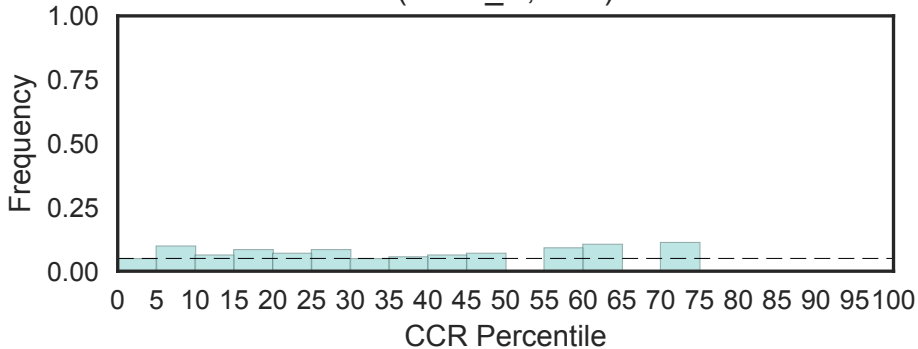

TAFA family  
(TAFA, N=5)

Fisher's OR: 0; Bonferroni p-val: 1

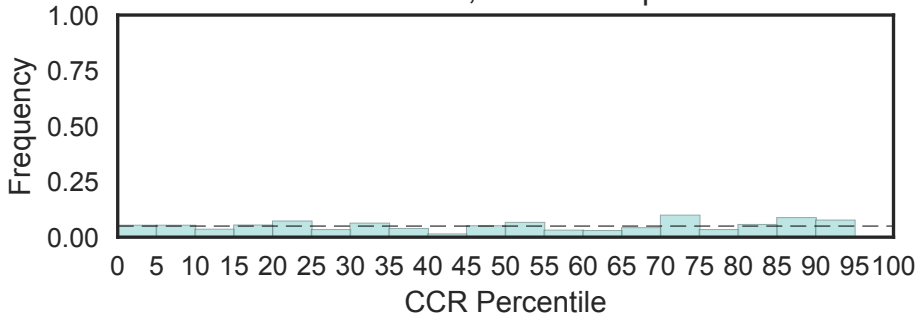

NHR1 homology to TAF  
(TAFH, N=5)

Fisher's OR: 2.98; Bonferroni p-val: 1

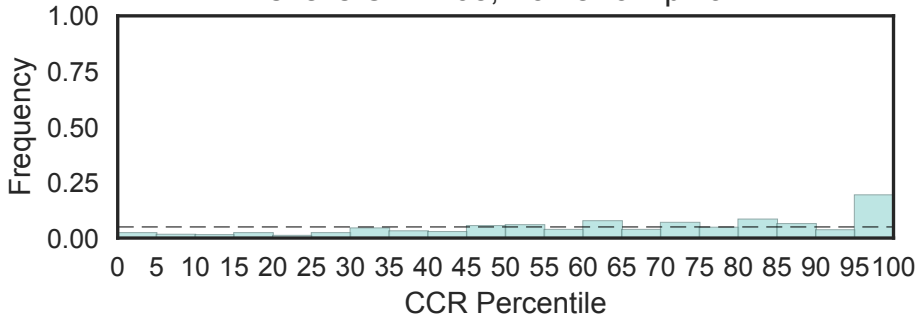

hTAFII28-like protein conserved region  
(TAFII28, N=2)

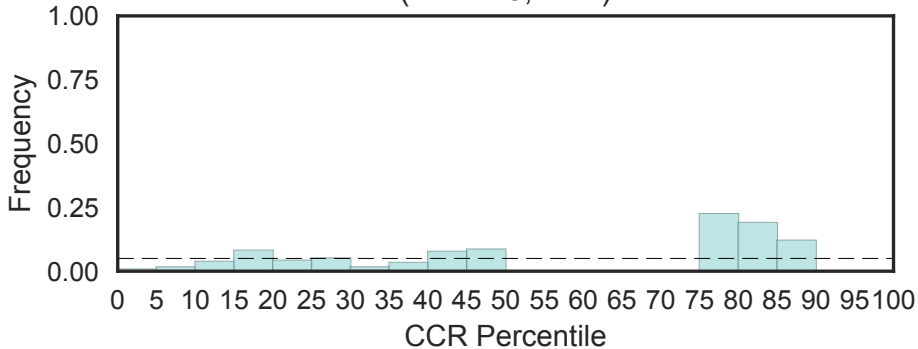

TAFII55 protein conserved region  
(TAFII55\_N, N=1)

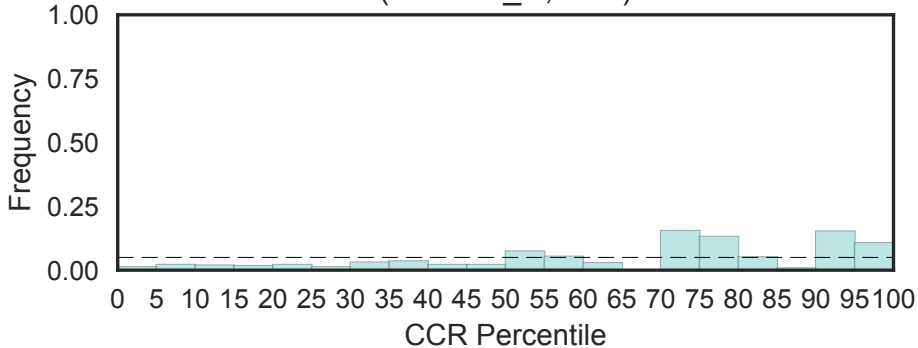

# Hedgehog signalling target (TALPID3, N=1)

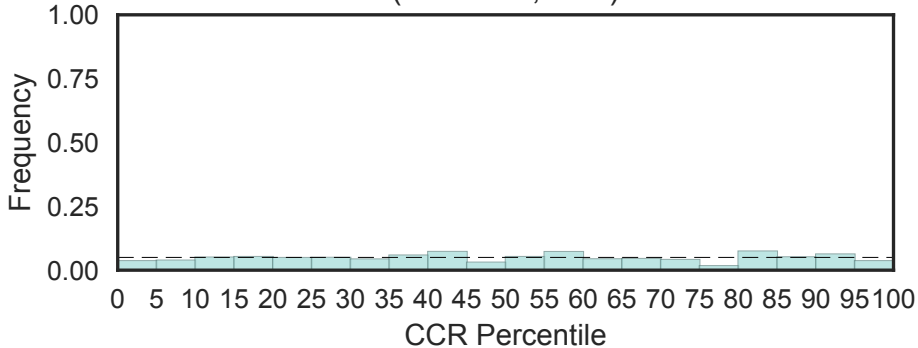

Transaldolase/Fructose-6-phosphate aldolase  
(TAL\_FSA, N=1)

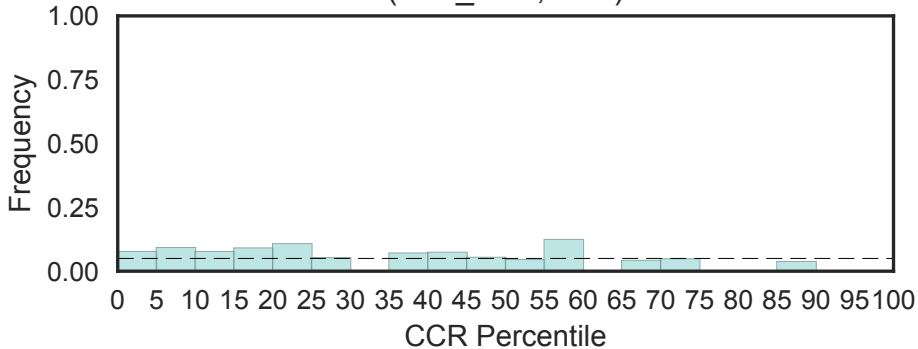

# Telomere-length maintenance and DNA damage repair (TAN, N=1)

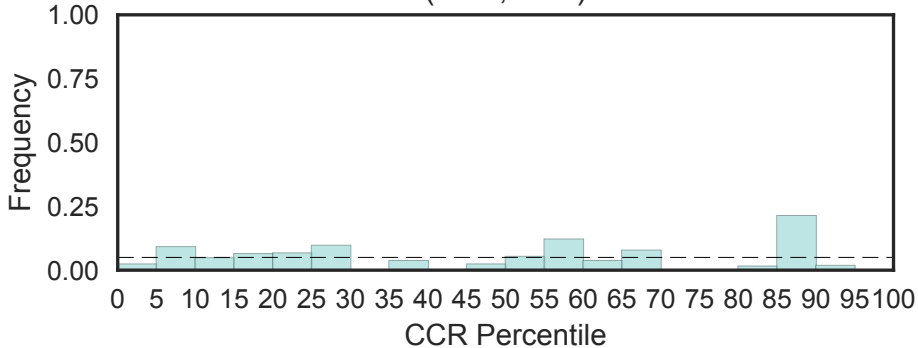



# Transport and Golgi organisation 2 (TANGO2, N=1)

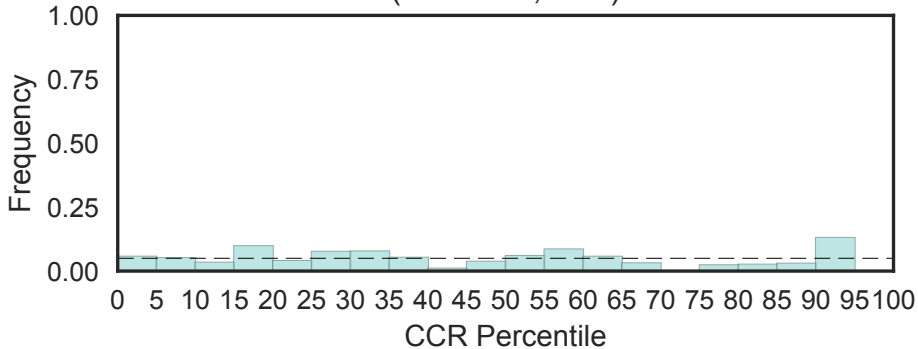

TAP C-terminal domain  
(TAP\_C, N=1)

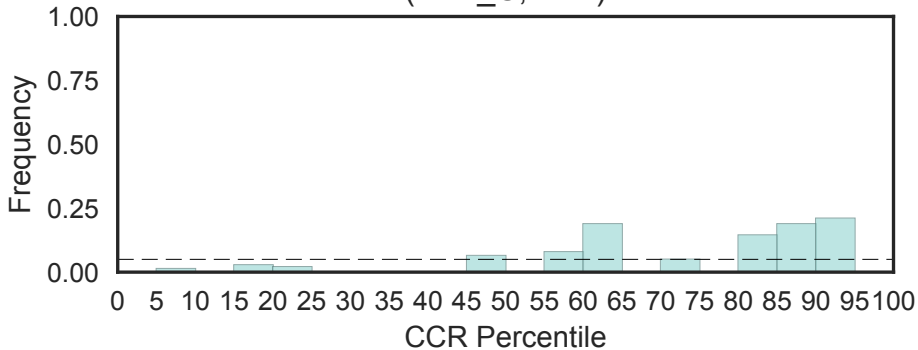

Taste receptor protein (TAS2R)  
(TAS2R, N=30)

Fisher's OR: 0.0685; Bonferroni p-val: 1.47e-06

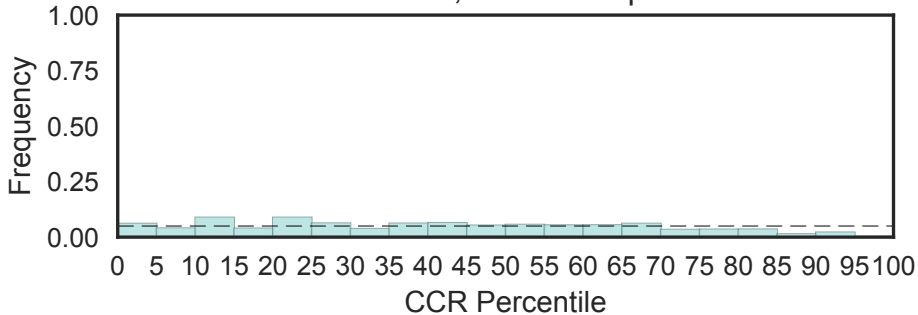

Aminotransferase ubiquitination site  
(TAT\_ubiq, N=1)

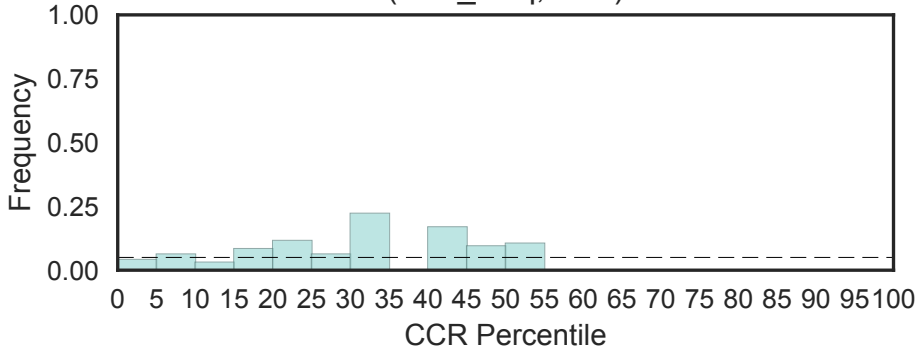

Xylanase inhibitor C-terminal  
(TAXi\_C, N=5)

Fisher's OR: 2.67; Bonferroni p-val: 1

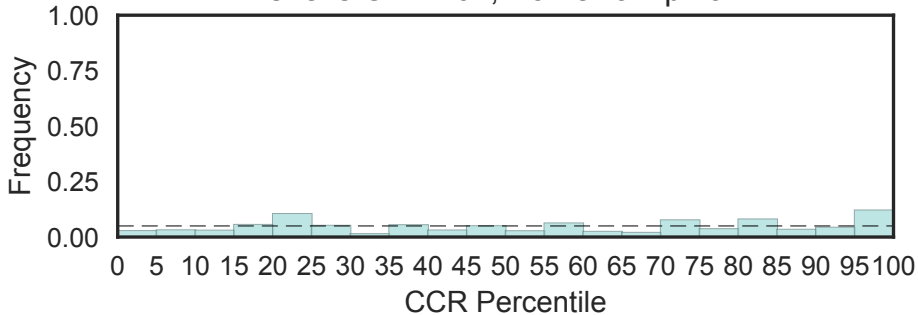

Xylanase inhibitor N-terminal  
(TAXi\_N, N=10)

Fisher's OR: 0.56; Bonferroni p-val: 1

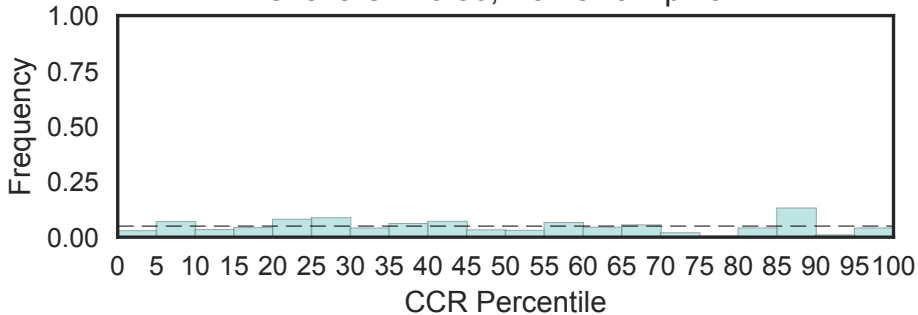

TB domain  
(TB, N=42)

Fisher's OR: 1.17; Bonferroni p-val: 1

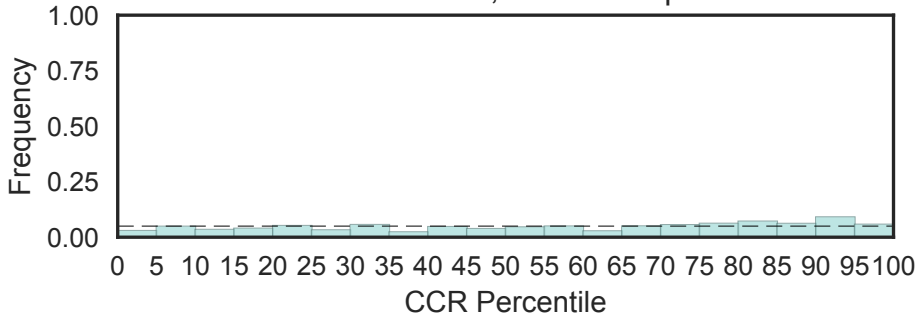

TB2/DP1, HVA22 family  
(TB2\_DP1\_HVA22, N=7)

Fisher's OR: 0.569; Bonferroni p-val: 1

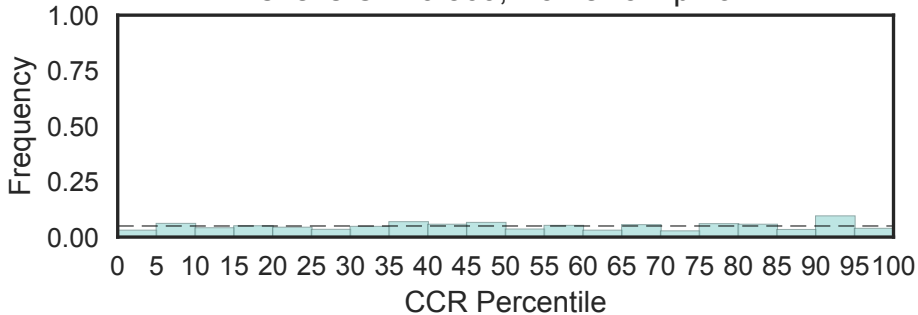



# Tubulin binding cofactor A (TBCA, N=1)

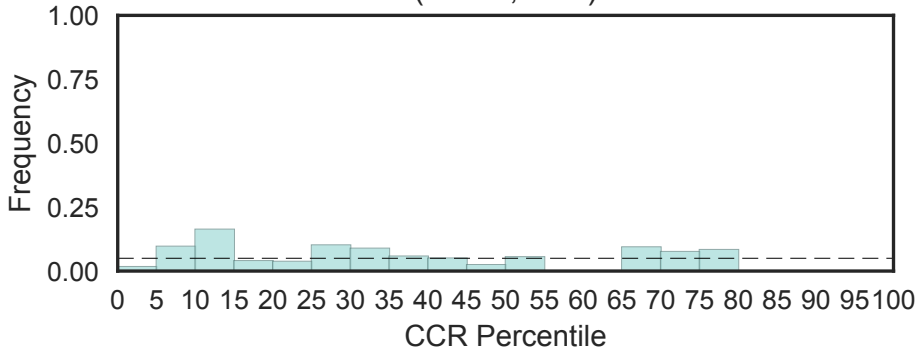

# Tubulin binding cofactor C (TBCC, N=2)

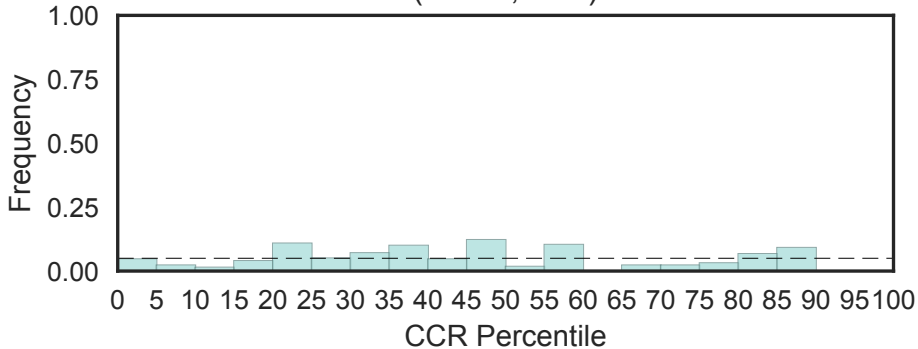

Tubulin-specific chaperone C N-terminal domain  
(TBCC\_N, N=1)

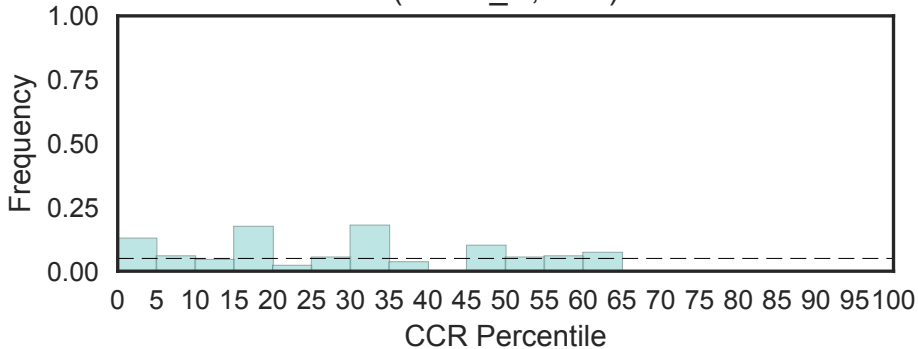

TBD domain  
(TBD, N=3)

Fisher's OR: 0; Bonferroni p-val: 1

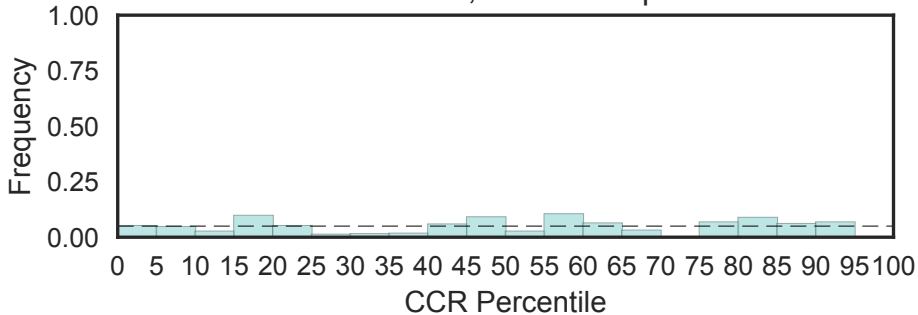

Transcription factor TFIIID (or TATA-binding protein, TBP)  
(TBP, N=6)

Fisher's OR: 6.12; Bonferroni p-val: 1

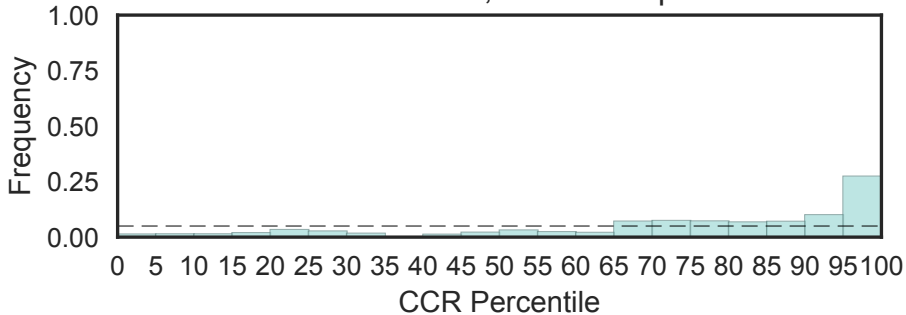

# TATA box-binding protein binding (TBP-binding, N=1)

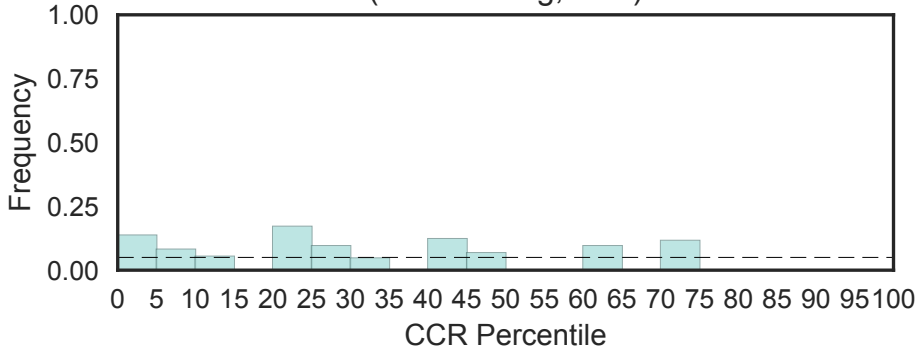

Tat binding protein 1(TBP-1)-interacting protein (TBPIP)  
(TBPIP, N=1)

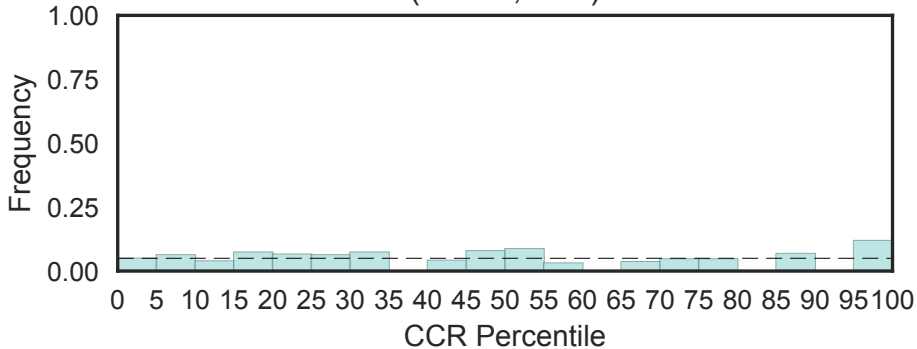

# T-box transcription factor (TBX, N=2)

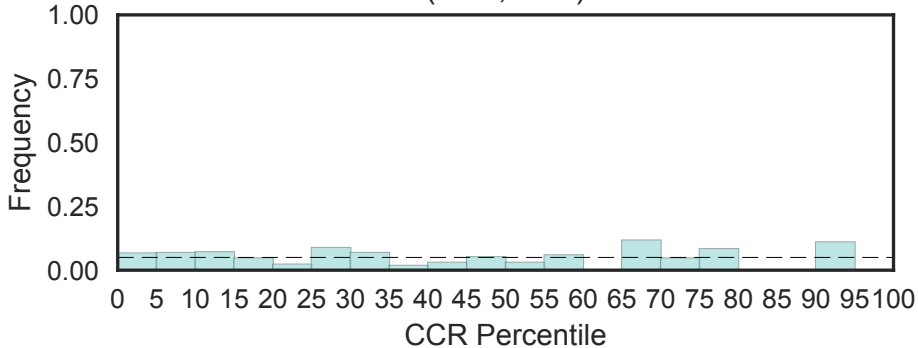



# Thyroid cancer protein 1 (TC1, N=2)

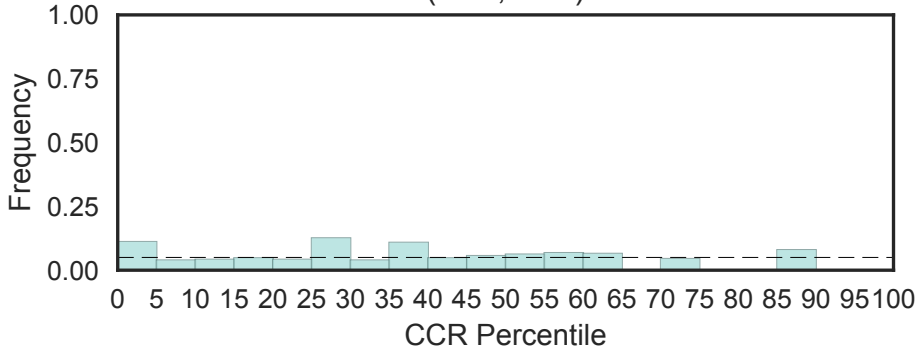

TCL1/MTCP1 family  
(TCL1\_MTCP1, N=2)

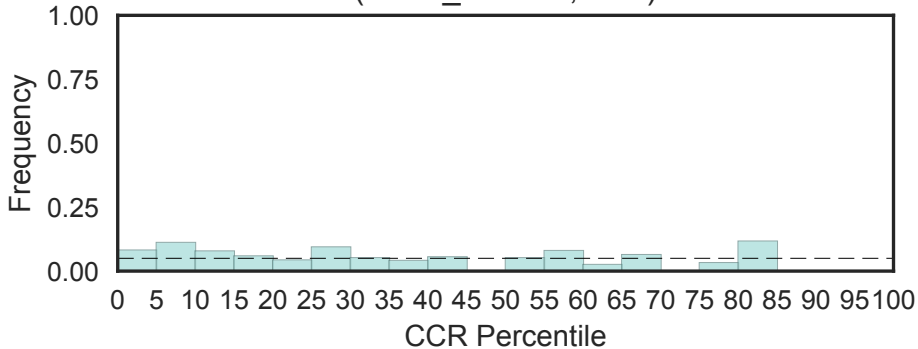

Tesmin/TSO1-like CXC domain, cysteine-rich domain  
(TCR, N=3)

Fisher's OR: 18; Bonferroni p-val: 1

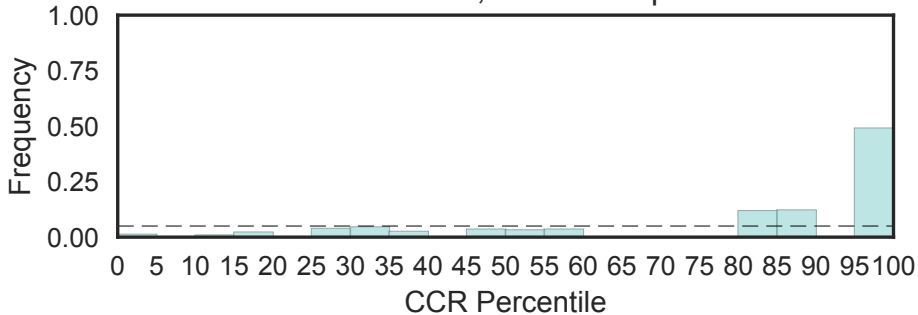

# Tongue Cancer Chemotherapy Resistant Protein 1 (TCRP1, N=2)

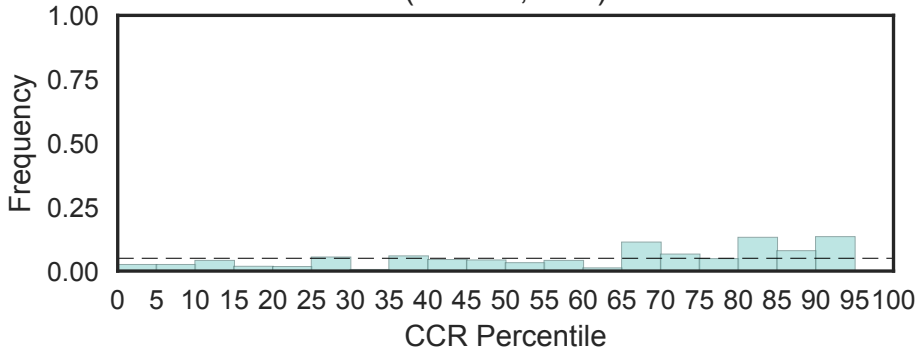

T-cell surface glycoprotein CD3 zeta chain  
(TCR\_zetazeta, N=2)

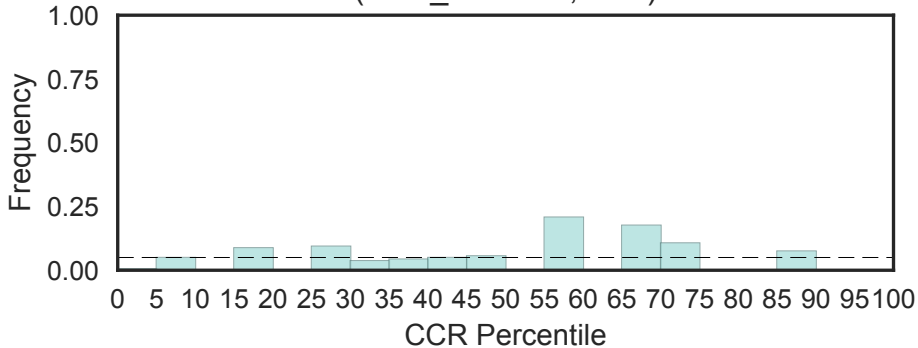

# Translationally controlled tumour protein (TCTP, N=1)

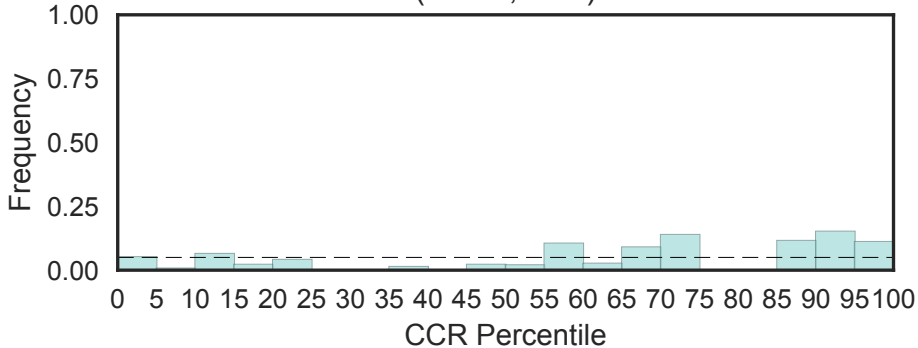

Testis development-related protein  
(TDRP, N=1)

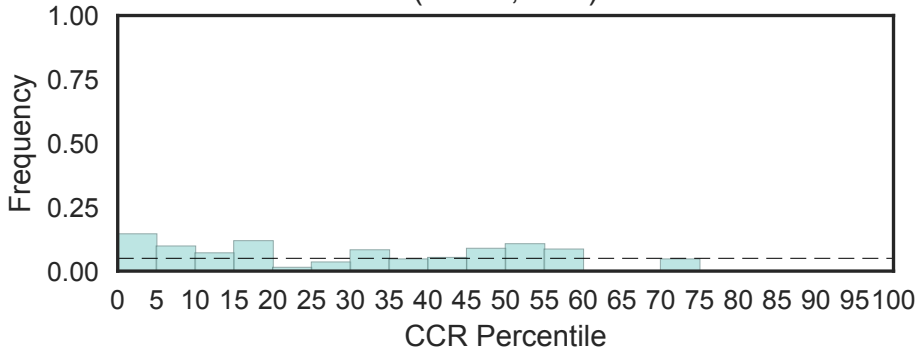

TEA/ATTS domain family  
(TEA, N=4)

Fisher's OR: 1.26; Bonferroni p-val: 1

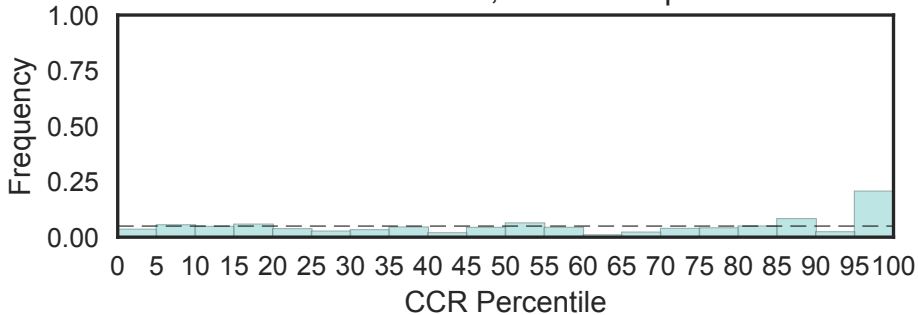



TEP1 N-terminal domain  
(TEP1\_N, N=4)

Fisher's OR: 0; Bonferroni p-val: 1

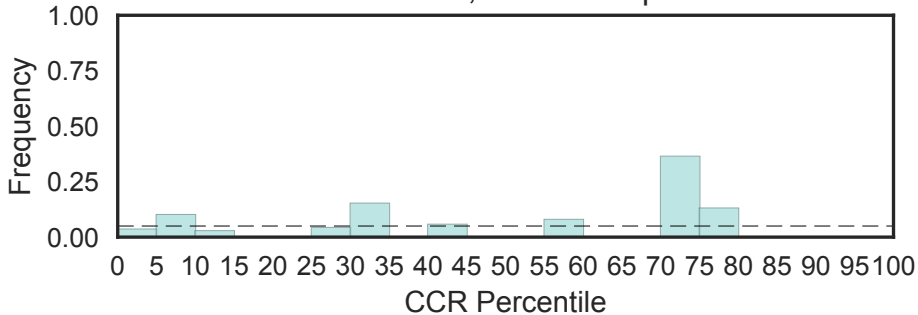

Telomere-associated protein TERB2  
(TERB2, N=1)

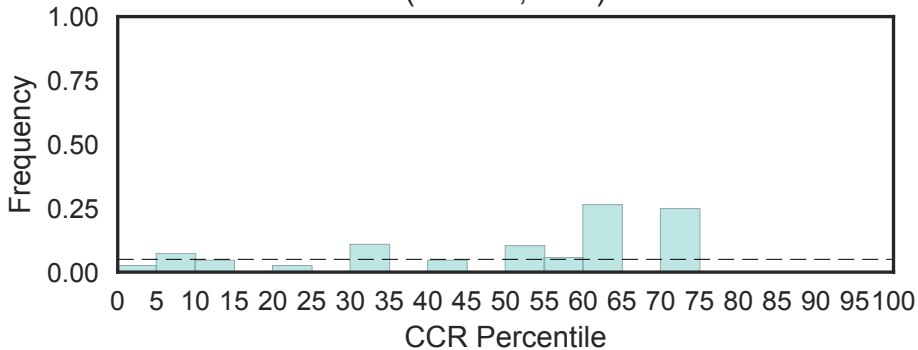

Telomeric repeat-binding factor 2 Rap1-binding motif  
(TERF2\_RBM, N=1)

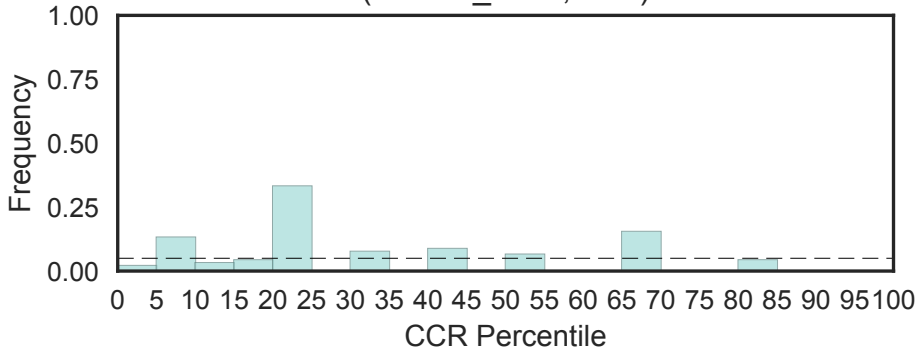

Testis-expressed 12  
(TEX12, N=2)

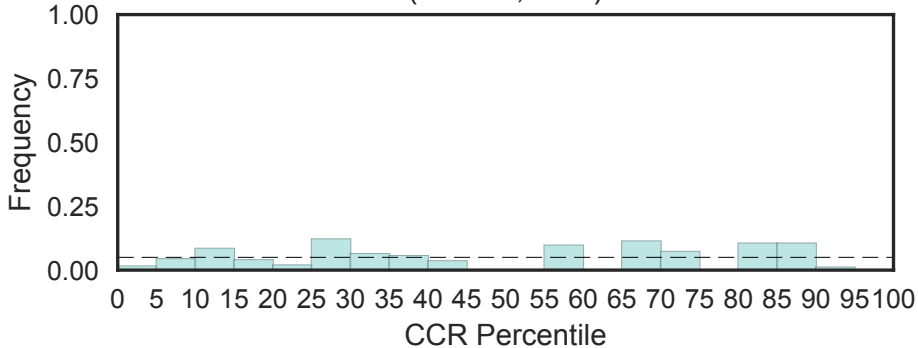

Testis expressed sequence 15  
(TEX15, N=2)

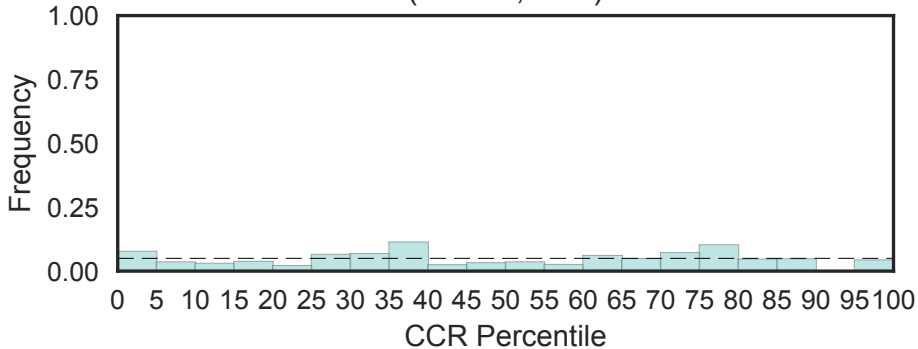

Testis-expressed protein 19  
(TEX19, N=1)

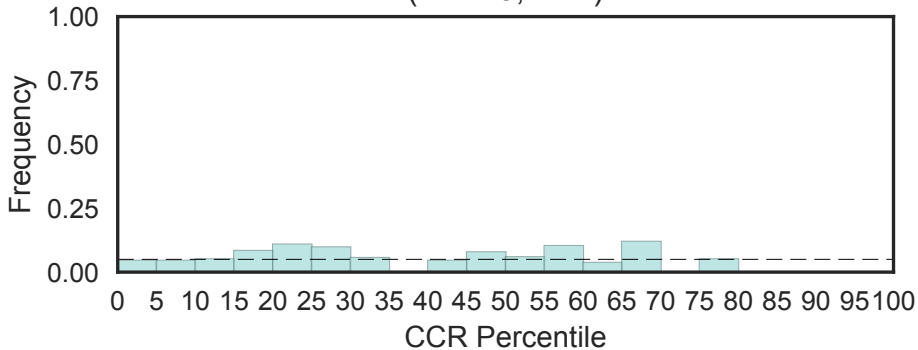

Testis-expressed sequence 29 protein  
(TEX29, N=1)

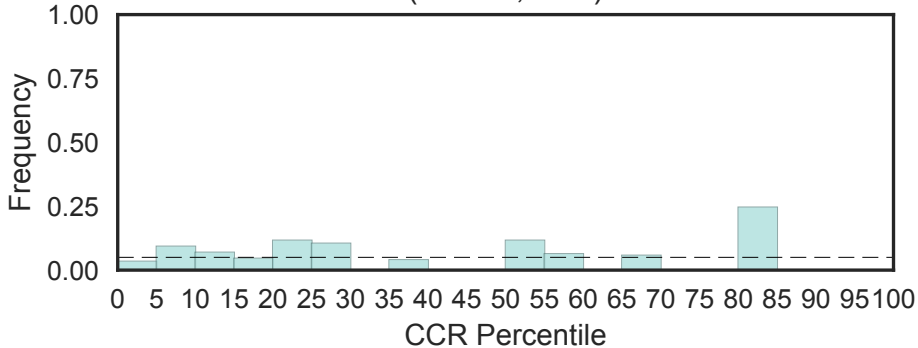

Testis-expressed sequence 33 protein family  
(TEX33, N=1)

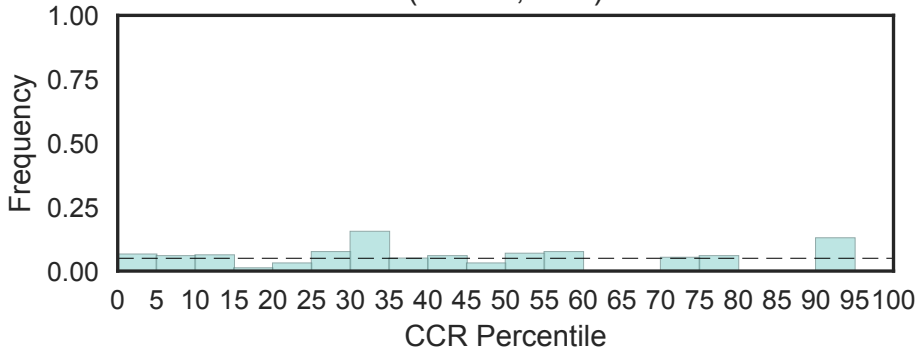



Tubulin folding cofactor D C terminal  
(TFCD\_C, N=1)

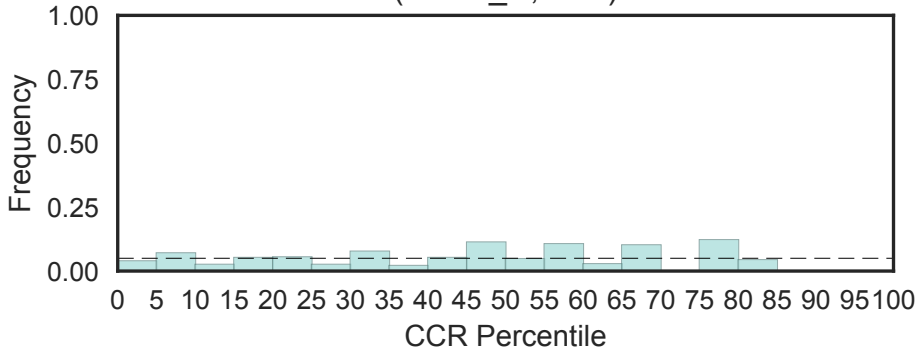

Transcription factor IIA, alpha/beta subunit  
(TFIIA, N=4)

Fisher's OR: 0.622; Bonferroni p-val: 1

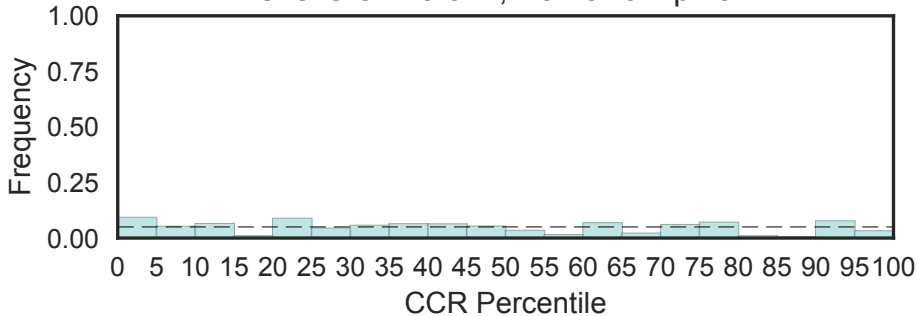

Transcription initiation factor IIA, gamma subunit  
(TFIIA\_gamma\_C, N=1)

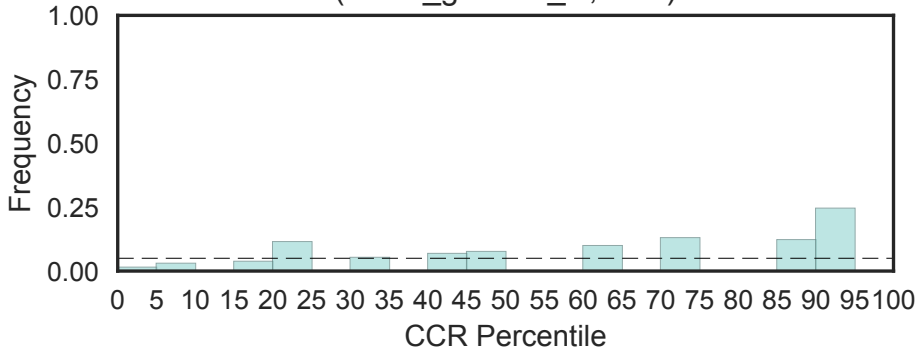

Transcription initiation factor IIA, gamma subunit, helical domain  
(TFIIA\_gamma\_N, N=1)

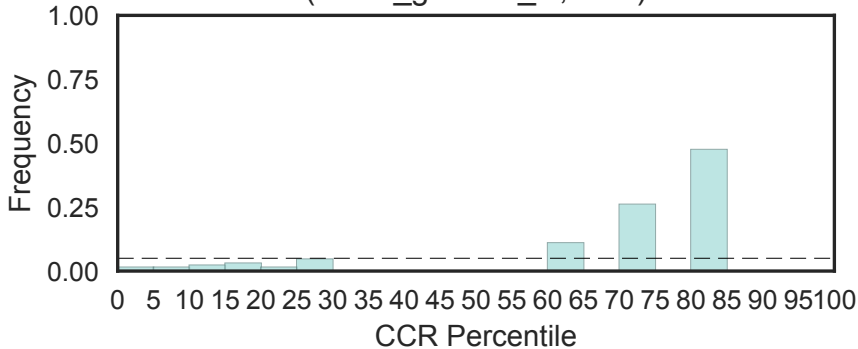

Transcription factor TFIIIB repeat  
(TFIIIB, N=4)

Fisher's OR: 2.73; Bonferroni p-val: 1

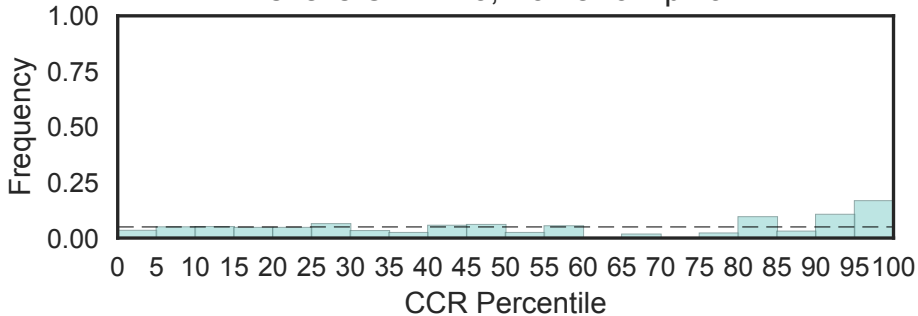

Transcription initiation factor IID, 18kD subunit  
(TFIID-18kDa, N=3)

Fisher's OR: 1.07; Bonferroni p-val: 1

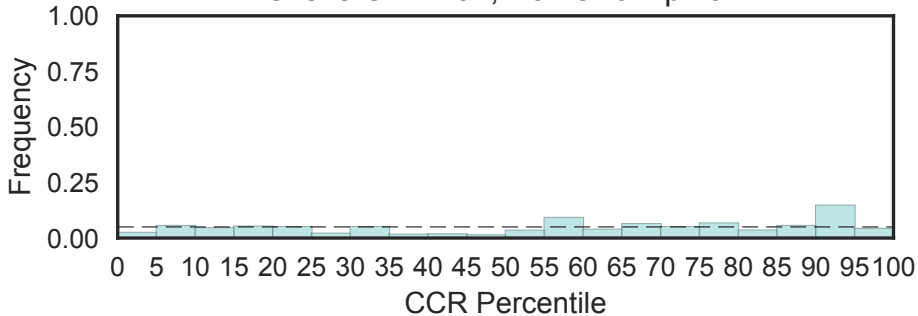

Transcription initiation factor IID, 31kD subunit  
(TFIID-31kDa, N=1)

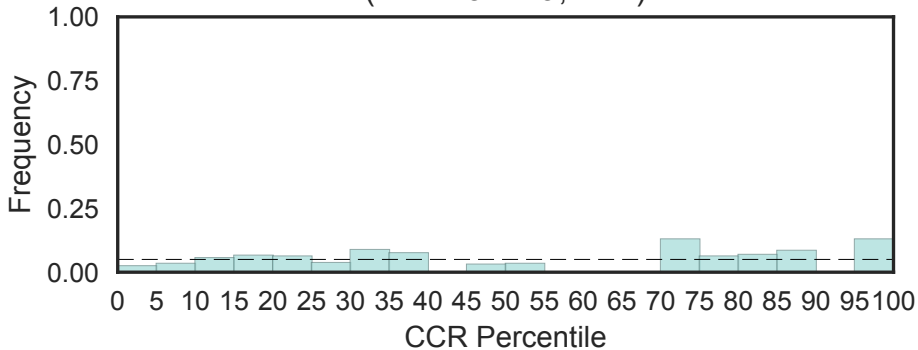

Transcription initiation factor TFIID subunit A  
(TFIID\_20kDa, N=1)

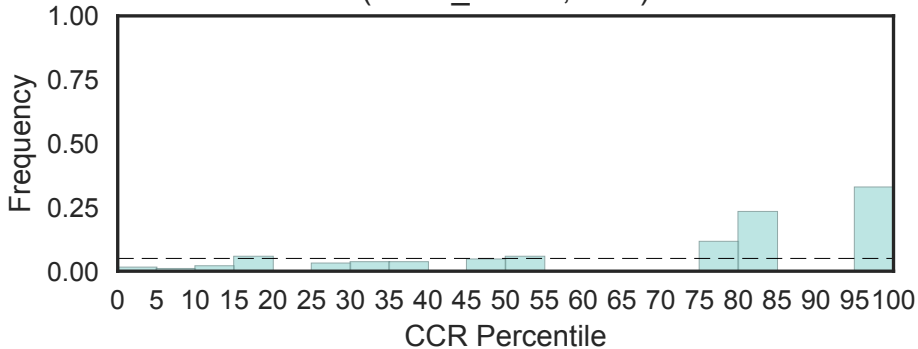



Transcription initiation factor TFIID 23-30kDa subunit  
(TFIID\_30kDa, N=1)

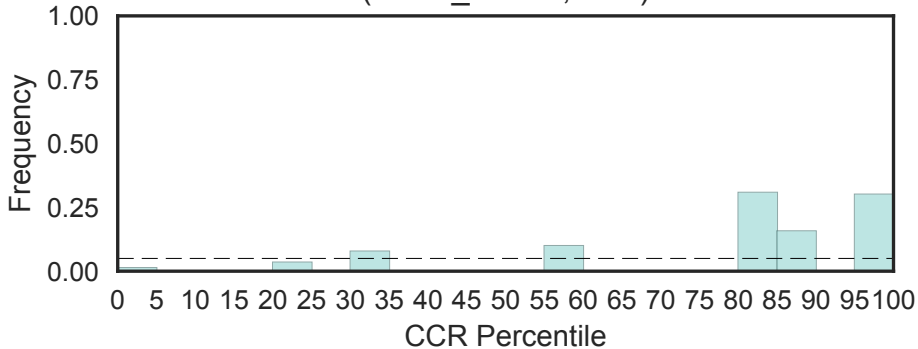

WD40 associated region in TFIID subunit, NTD2 domain  
(TFIID\_NTD2, N=2)

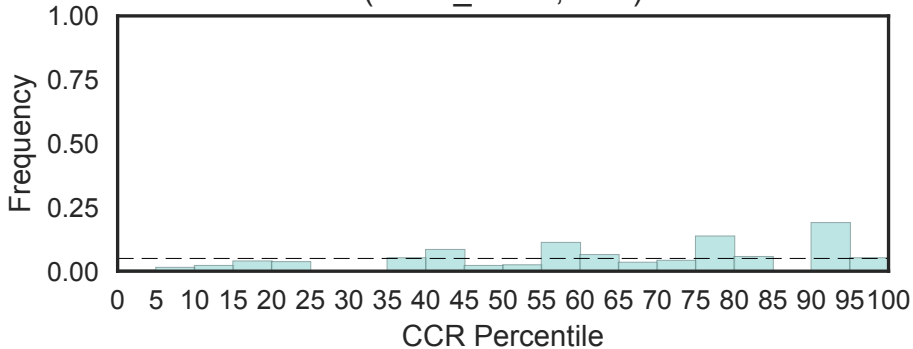

C-terminal general transcription factor TFIIIE alpha  
(TFIIIE-A\_C, N=1)

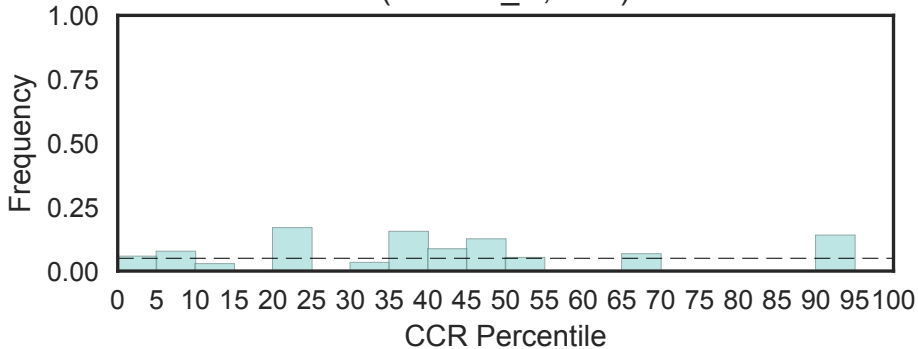

TFIIIE alpha subunit  
(TFIIIE\_alpha, N=1)

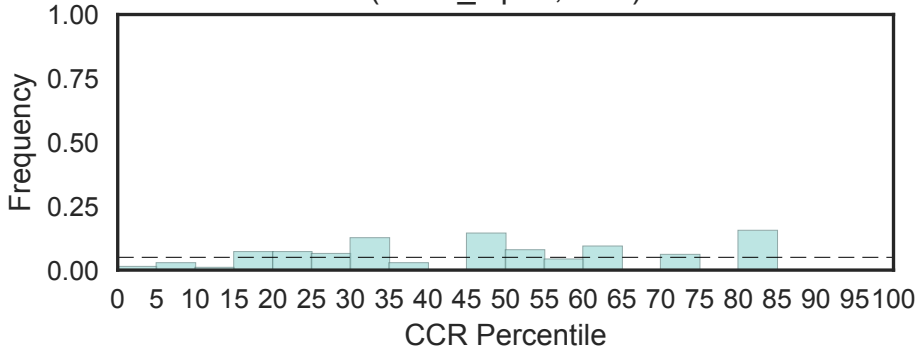

TFIIIE beta subunit core domain  
(TFIIIE\_beta, N=1)

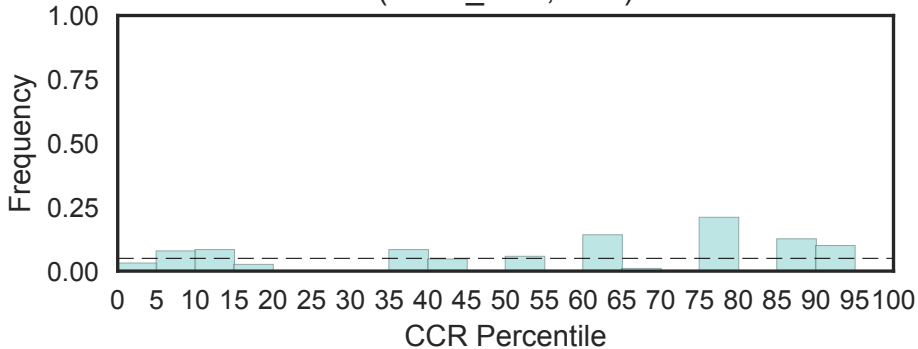

Transcription initiation factor IIF, alpha subunit (TFIIF-alpha)  
(TFIIF\_alpha, N=1)

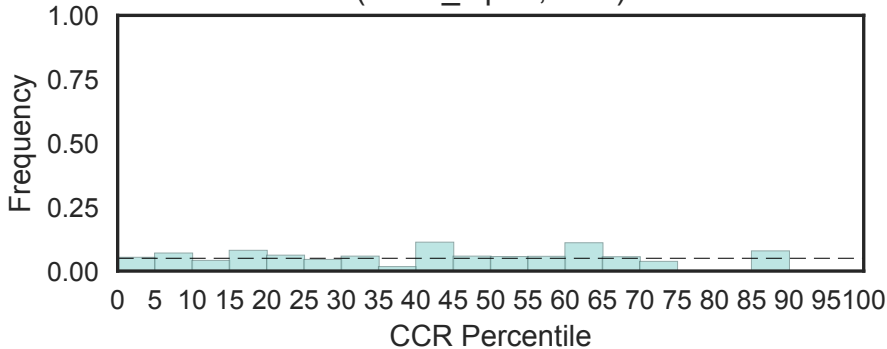

Transcription initiation factor IIF, beta subunit  
(TFIIF\_beta, N=2)

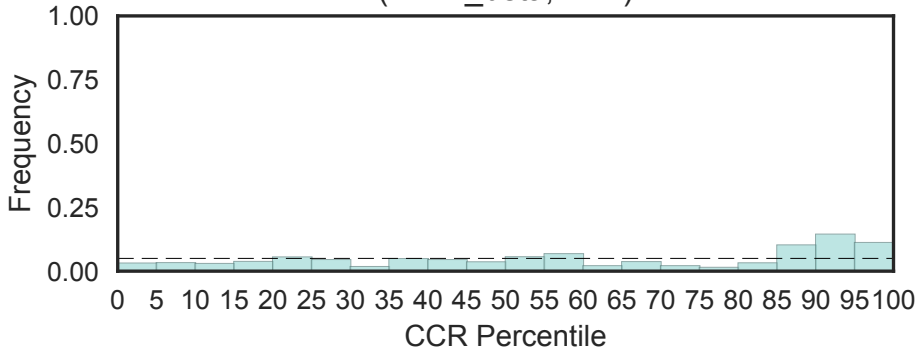

Transcription factor IIC subunit delta N-term  
(TFIIC\_delta, N=1)

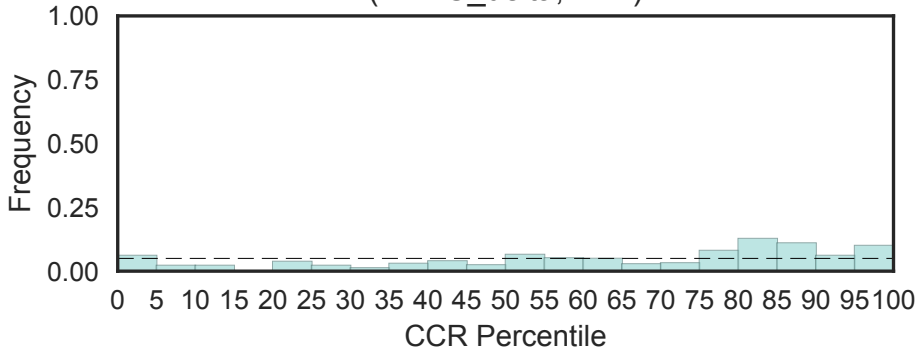



TFIIIC subunit  
(TFIIIC\_sub6, N=1)

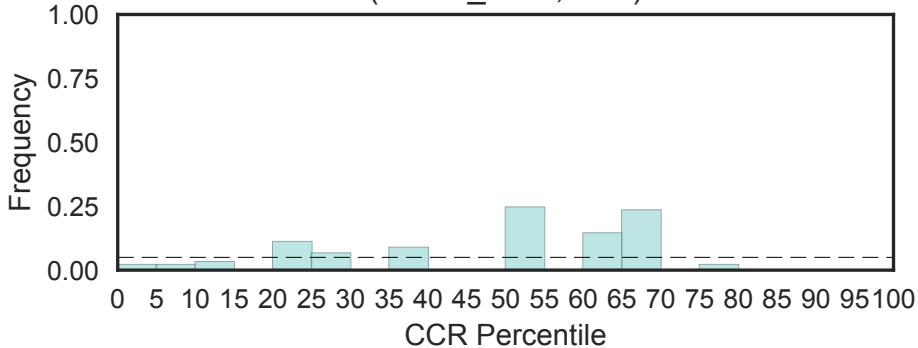

Transcription factor S-II (TFIIS)  
(TFIIS\_C, N=6)

Fisher's OR: 0; Bonferroni p-val: 1

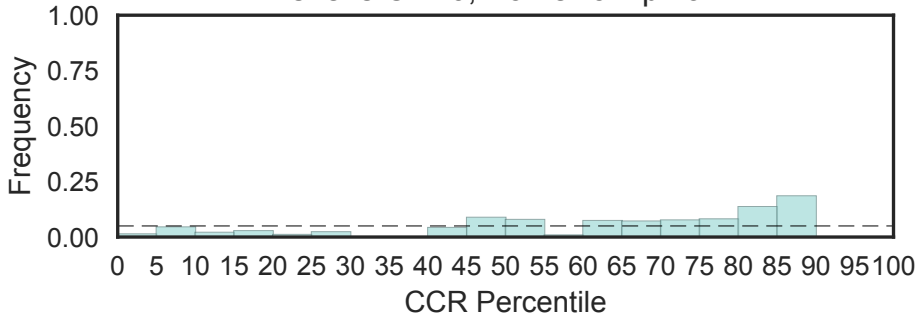

Transcription factor S-II (TFIIS), central domain  
(TFIIS\_M, N=6)

Fisher's OR: 0.865; Bonferroni p-val: 1

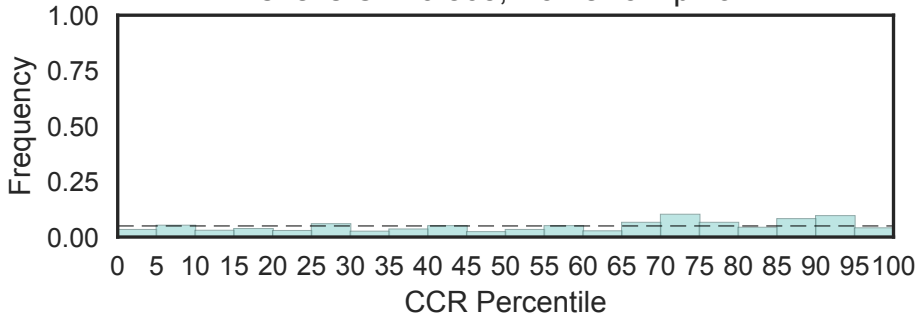

Transferrin receptor-like dimerisation domain  
(TFR\_dimer, N=4)

Fisher's OR: 0; Bonferroni p-val: 1

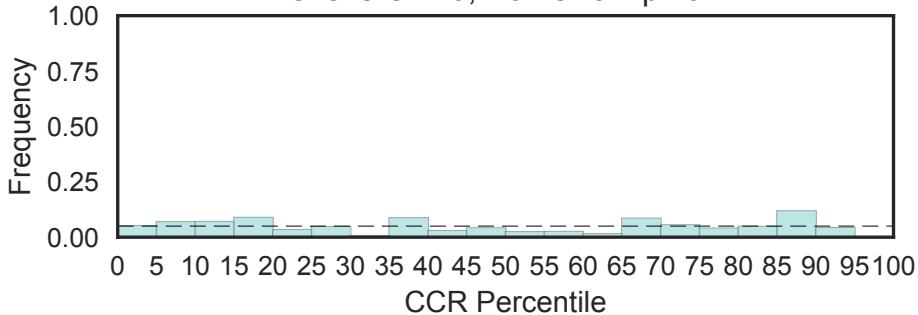

Transcription factor AP-2  
(TF\_AP-2, N=5)

Fisher's OR: 4.07; Bonferroni p-val: 1

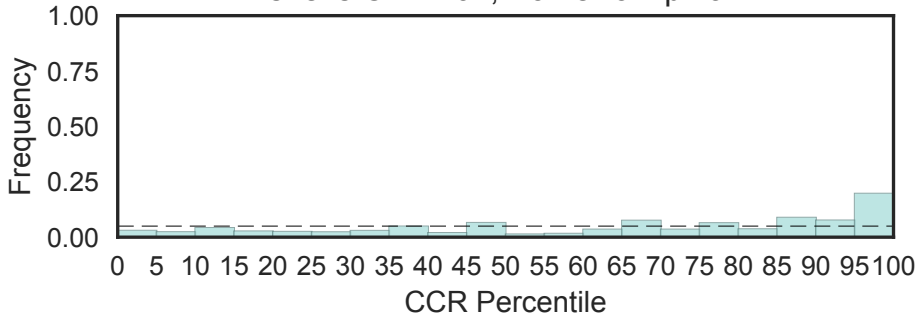

Otx1 transcription factor  
(TF\_Otx, N=3)

Fisher's OR: 1.03; Bonferroni p-val: 1

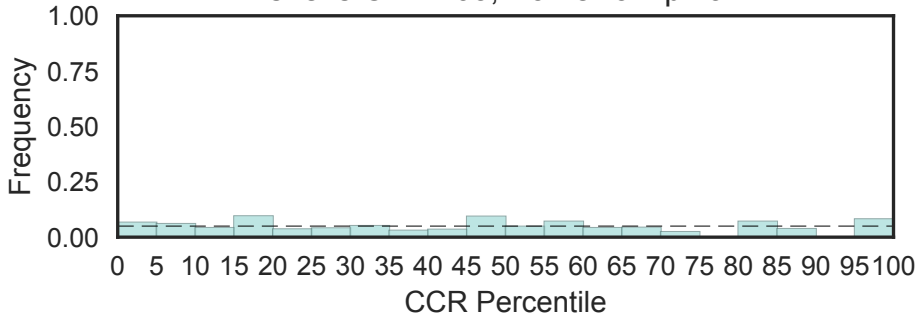

TFIIB zinc-binding  
(TF\_Zn\_Ribbon, N=4)  
Fisher's OR: 0; Bonferroni p-val: 1

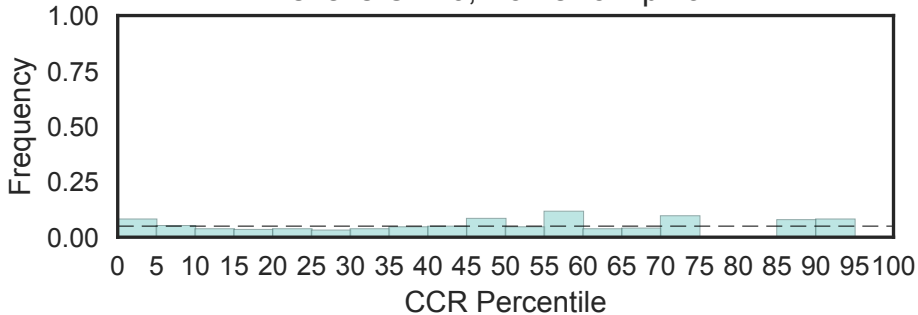

Transforming growth factor beta like domain  
(TGF\_beta, N=38)

Fisher's OR: 0.823; Bonferroni p-val: 1

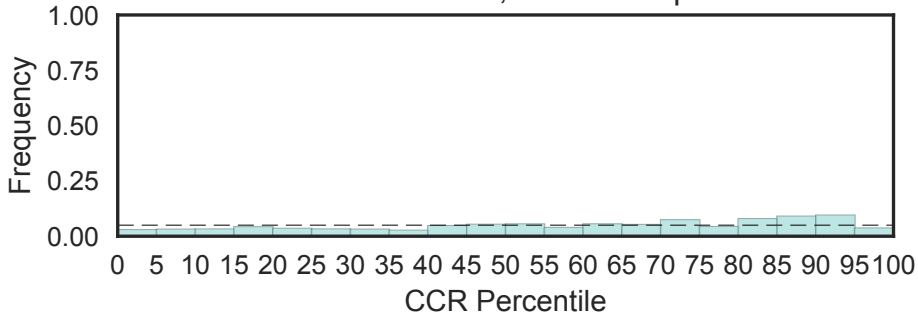



Transforming growth factor beta type I GS-motif  
(TGF\_beta\_GS, N=7)

Fisher's OR: 1.39; Bonferroni p-val: 1

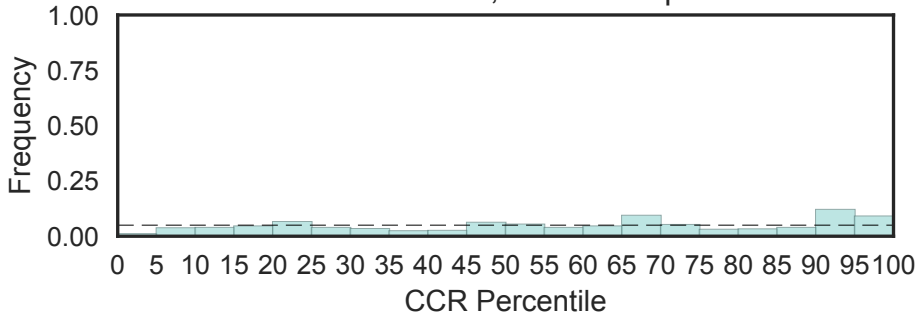

TGF-beta propeptide  
(TGFb\_propeptide, N=25)  
Fisher's OR: 0.605; Bonferroni p-val: 1

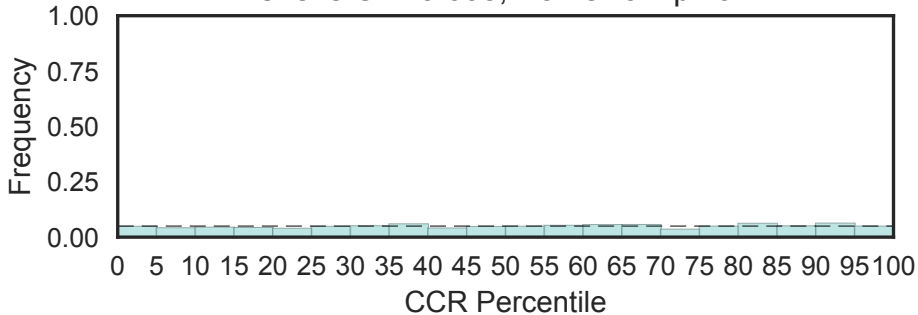

TGS domain  
(TGS, N=5)

Fisher's OR: 0.751; Bonferroni p-val: 1

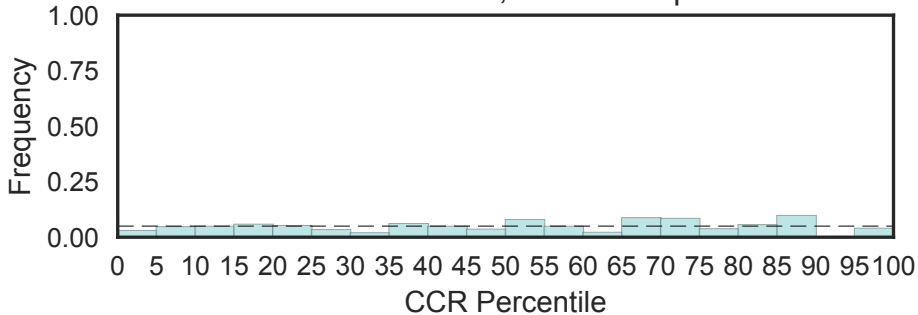

Queueine tRNA-ribosyltransferase  
(TGT, N=2)

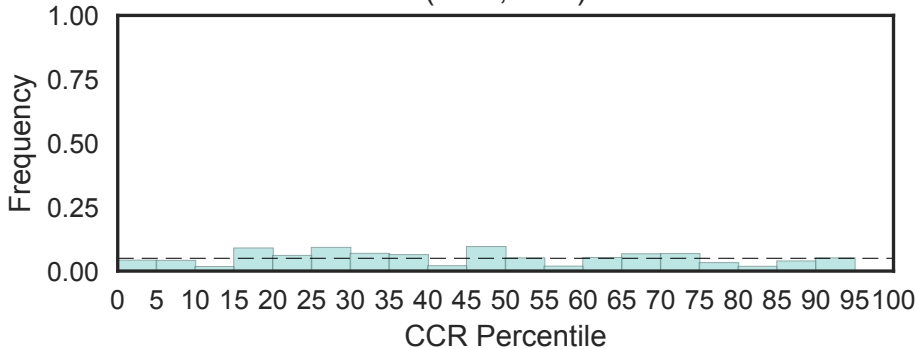

TH1 protein  
(TH1, N=1)

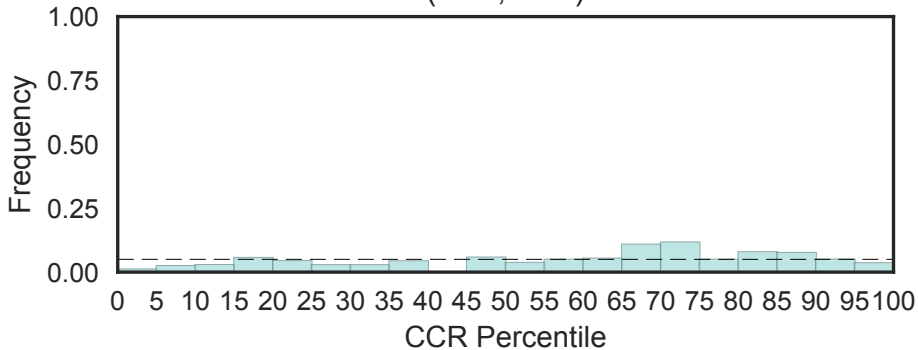

THAP domain  
(THAP, N=12)

Fisher's OR: 1.04; Bonferroni p-val: 1

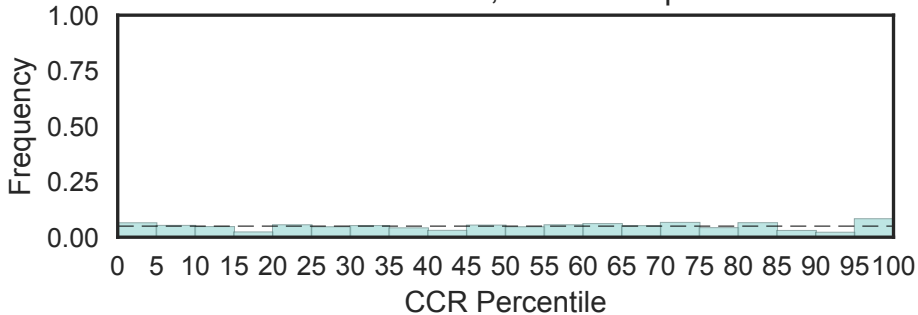

Testicular haploid expressed repeat  
(THEG, N=7)

Fisher's OR: 0; Bonferroni p-val: 1

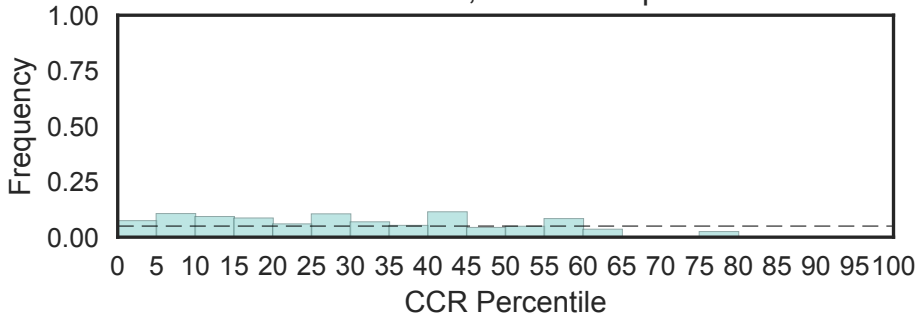

Testis highly expressed protein 4  
(THEG4, N=1)

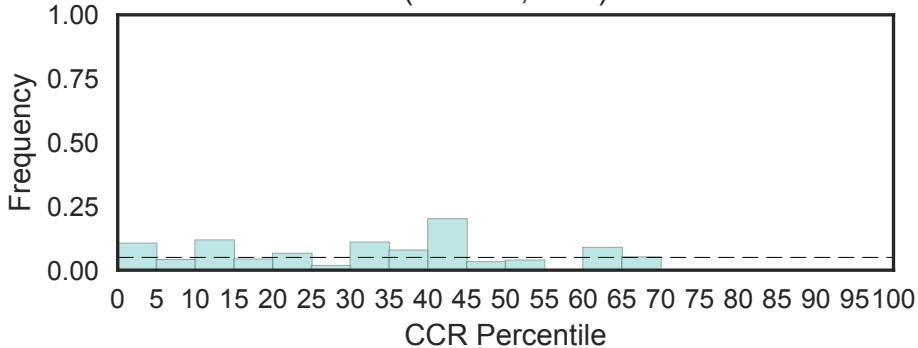



Tetrahydrofolate dehydrogenase/cyclohydrolase, catalytic domain  
(THF\_DHG\_CYH, N=4)

Fisher's OR: 0; Bonferroni p-val: 1

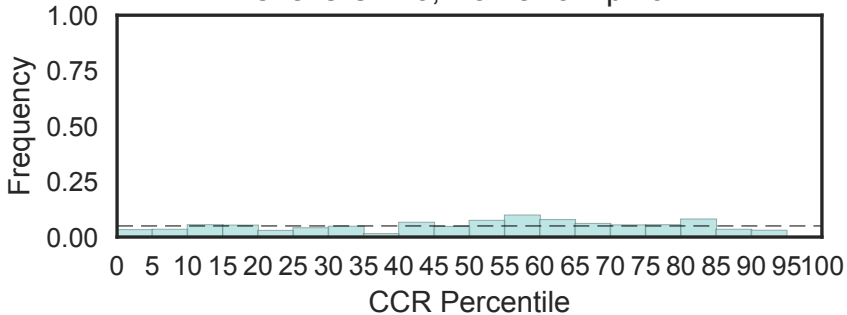

Tetrahydrofolate dehydrogenase/cyclohydrolase, NAD(P)-binding domain  
(THF\_DHG\_CYH\_C, N=4)

Fisher's OR: 0; Bonferroni p-val: 1

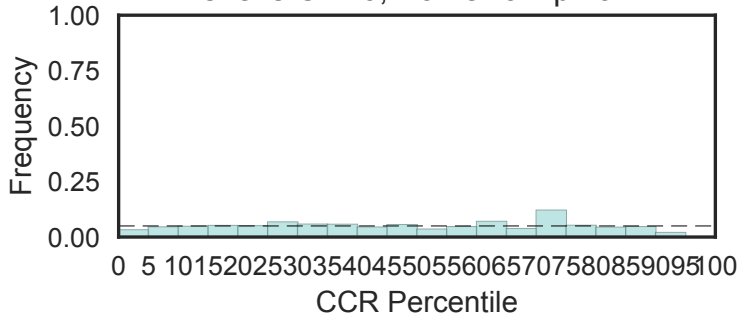

Tho complex subunit 7  
(THOC7, N=2)

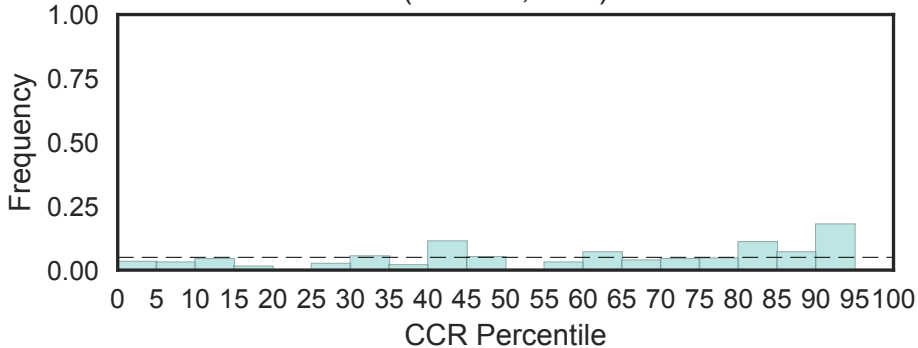

THRAP3/BCLAF1 family  
(THRAP3\_BCLAF1, N=3)

Fisher's OR: 0; Bonferroni p-val: 1

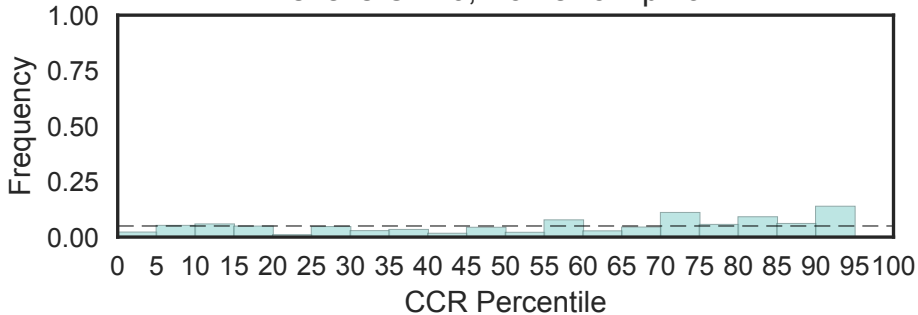

THUMP domain  
(THUMP, N=3)

Fisher's OR: 0; Bonferroni p-val: 1

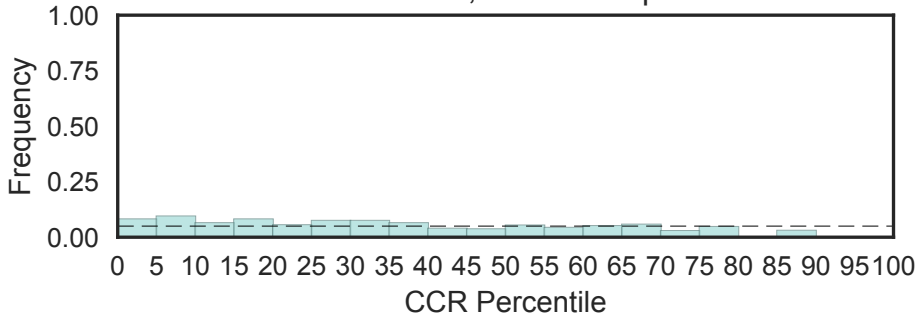

IPT/TIG domain  
(TIG, N=61)

Fisher's OR: 0.985; Bonferroni p-val: 1

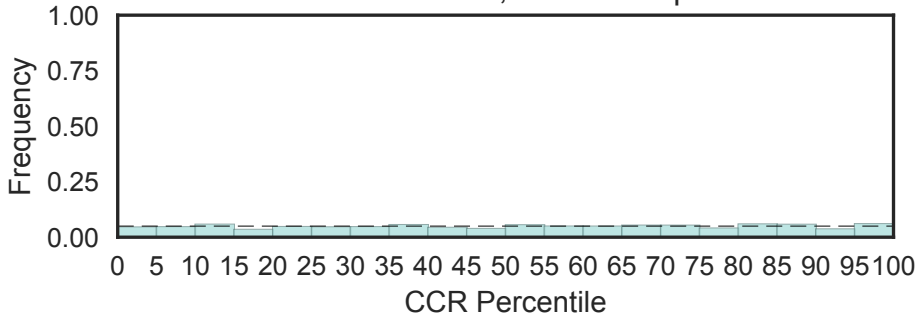

Trypsin Inhibitor like cysteine rich domain  
(TIL, N=38)

Fisher's OR: 0.16; Bonferroni p-val: 1

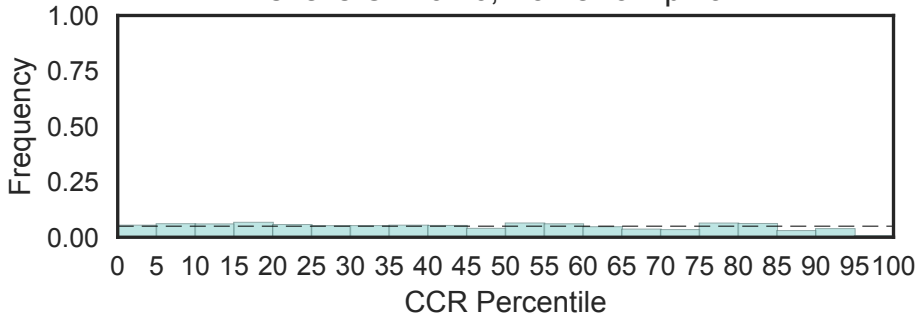

TILa domain  
(TILa, N=20)

Fisher's OR: 0; Bonferroni p-val: 1

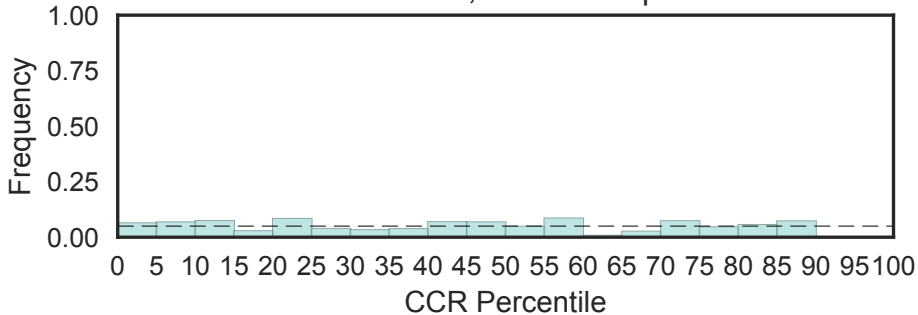



# Triosephosphate isomerase (TIM, N=1)

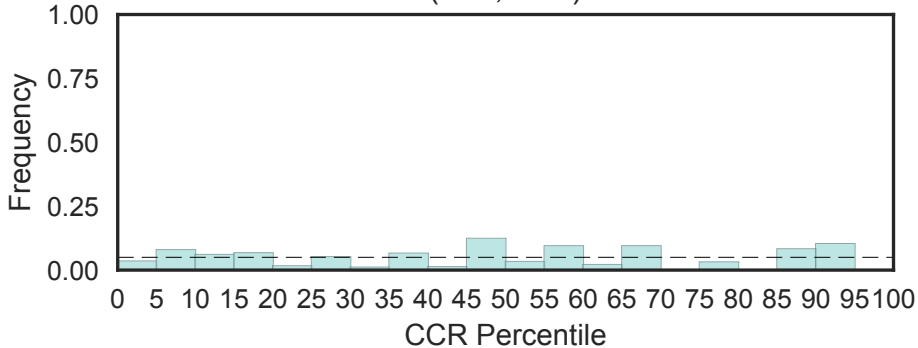

TIM21  
(TIM21, N=1)

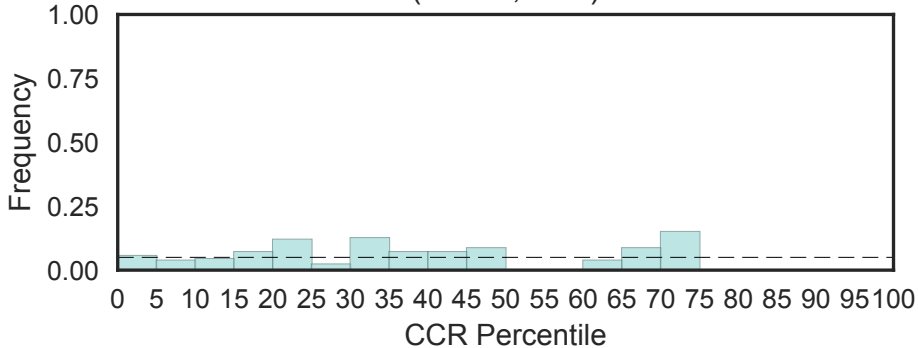

Timeless protein  
(TIMELESS, N=1)

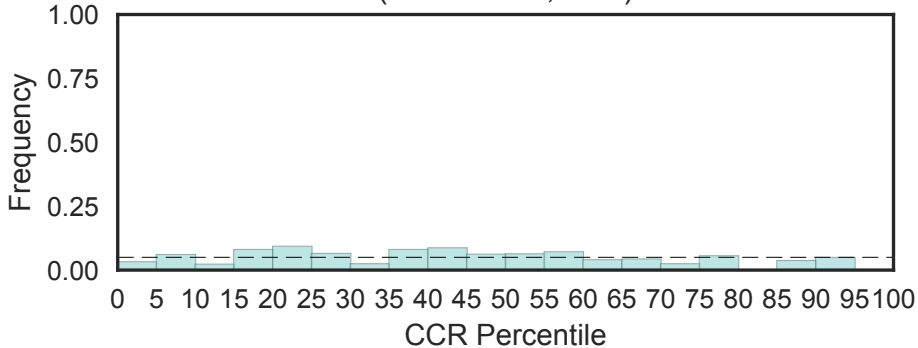

Timeless protein C terminal region  
(TIMELESS\_C, N=1)

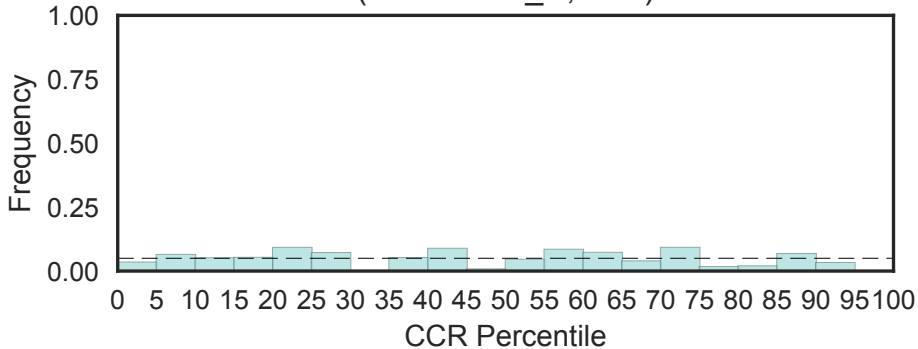

Tissue inhibitor of metalloproteinase  
(TIMP, N=4)  
Fisher's OR: 0.269; Bonferroni p-val: 1

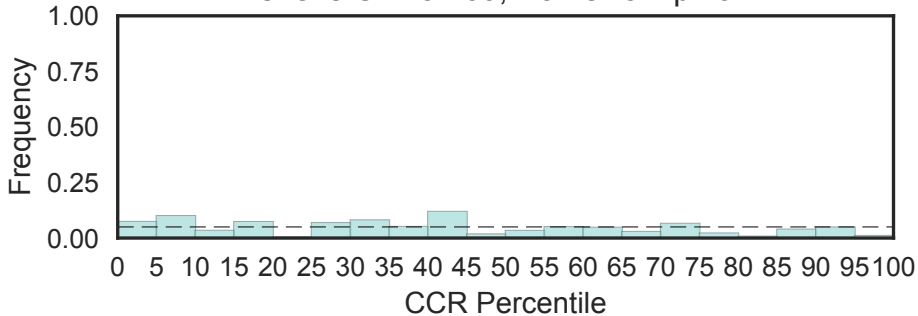

TERF1-interacting nuclear factor 2 N-terminus  
(TINF2\_N, N=1)

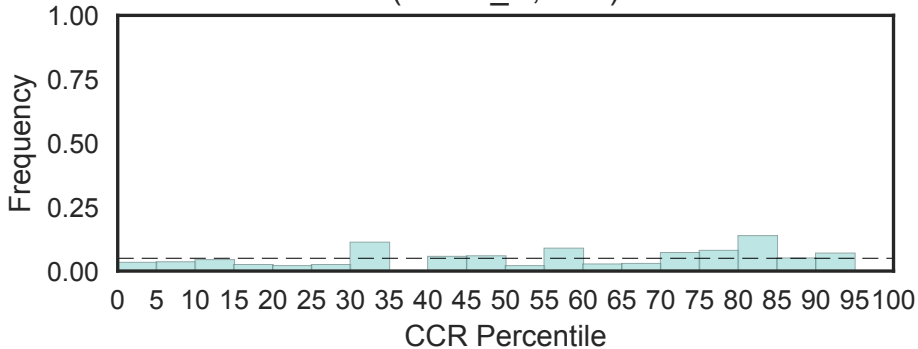

TATA-binding protein interacting (TIP20)  
(TIP120, N=2)

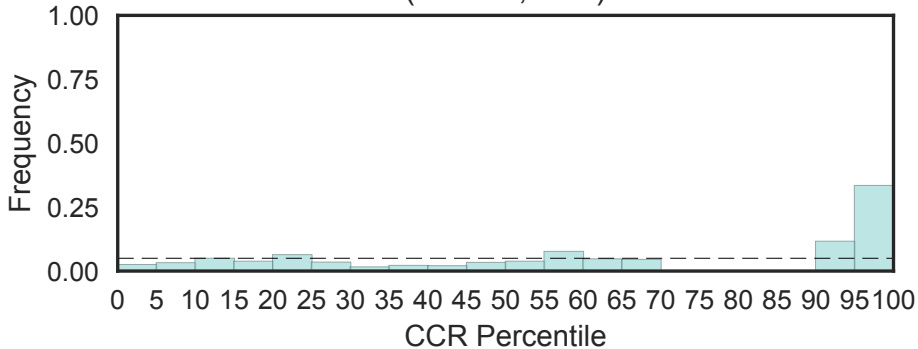

TIP39 peptide  
(TIP39, N=1)

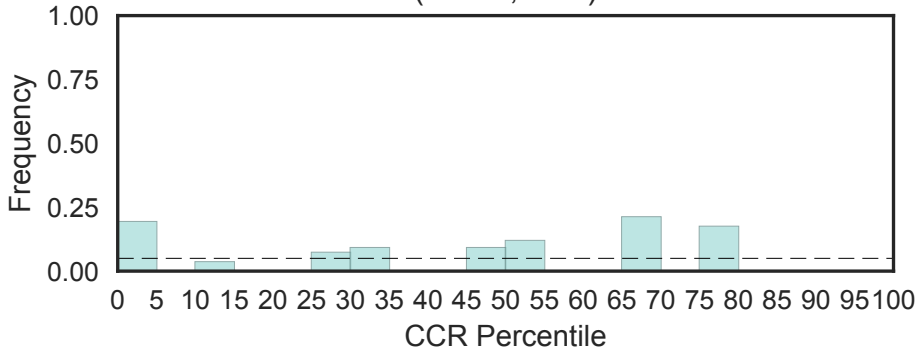



TIP41-like family  
(TIP41, N=1)

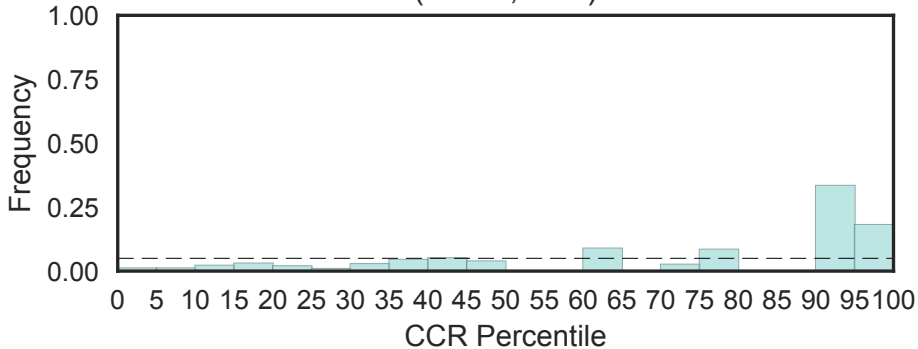

TIP49 C-terminus  
(TIP49, N=6)

Fisher's OR: 4.54; Bonferroni p-val: 0.156

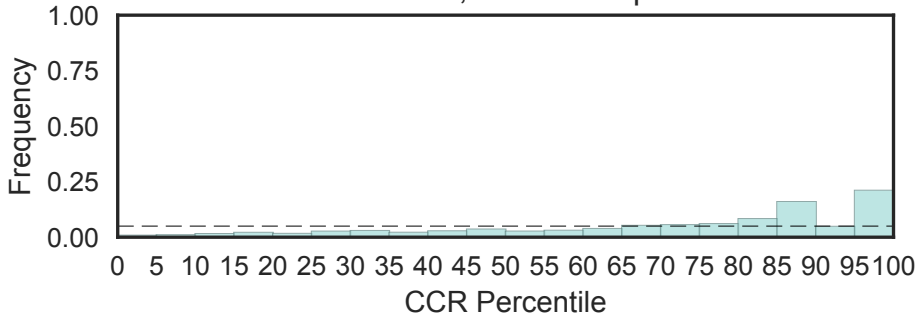

Tuftelin interacting protein N terminal  
(TIP\_N, N=1)

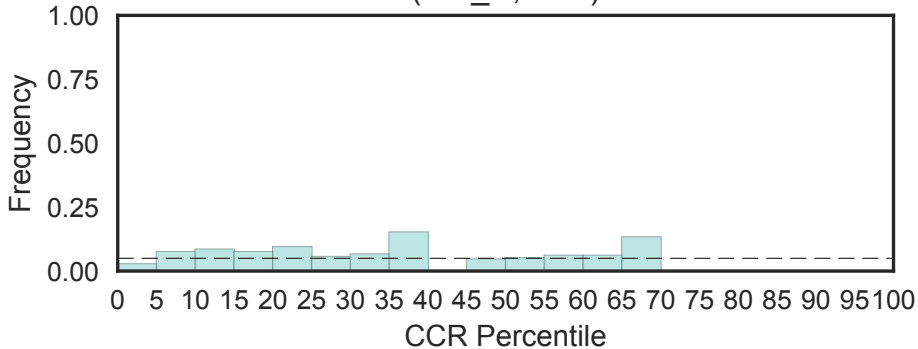

TIR domain  
(TIR, N=17)

Fisher's OR: 0.24; Bonferroni p-val: 1

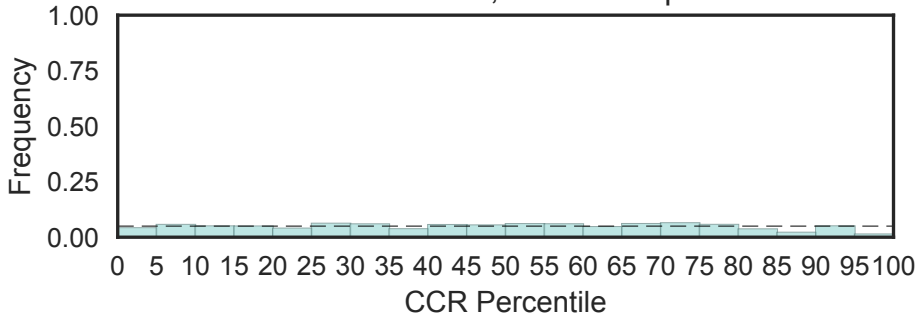

TIR domain  
(TIR\_2, N=11)

Fisher's OR: 0.562; Bonferroni p-val: 1

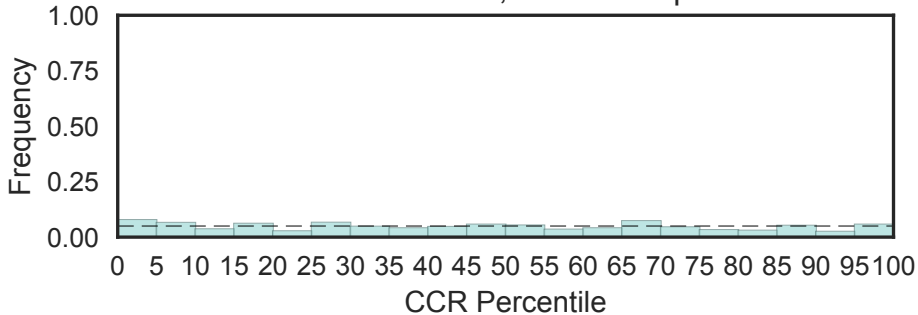

Thymidine kinase  
(TK, N=1)

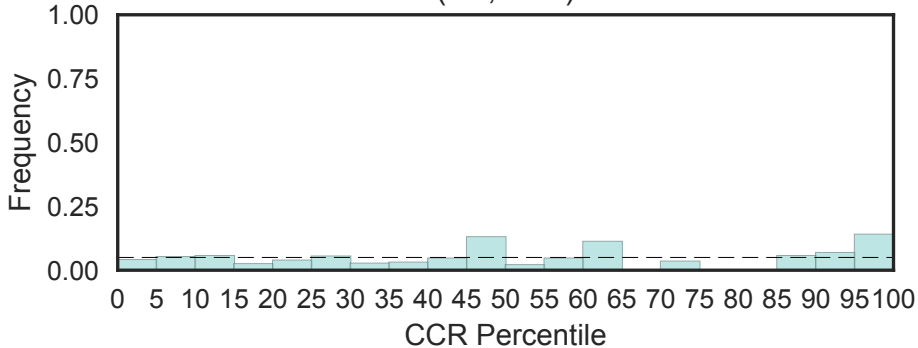

TLD  
(TLD, N=7)

Fisher's OR: 0.695; Bonferroni p-val: 1

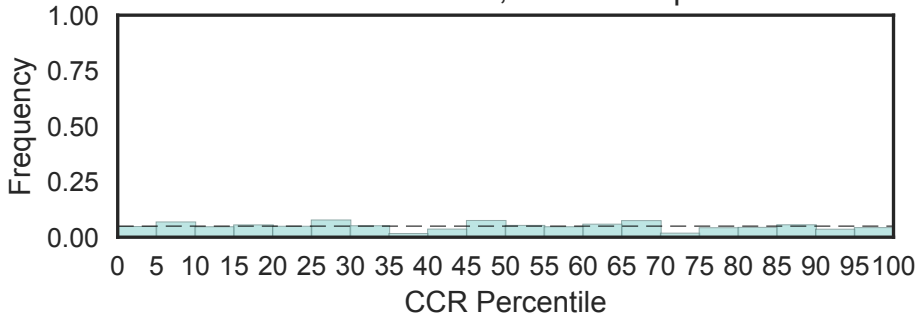

Groucho/TLE N-terminal Q-rich domain  
(TLE\_N, N=5)

Fisher's OR: 4.55; Bonferroni p-val: 1

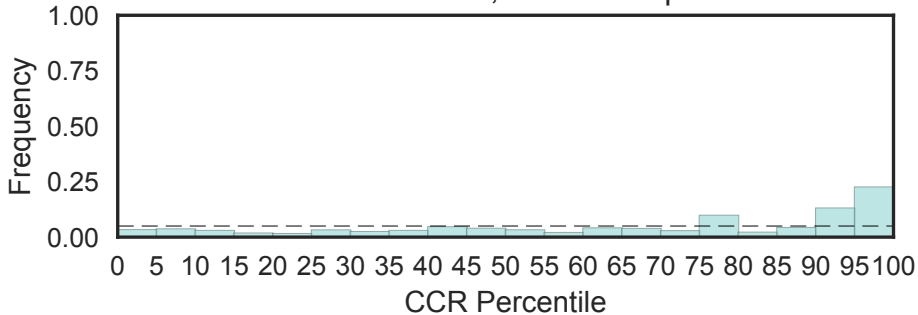



ENV polyprotein (coat polyprotein)  
(TLV\_coat, N=4)

Fisher's OR: 0; Bonferroni p-val: 1

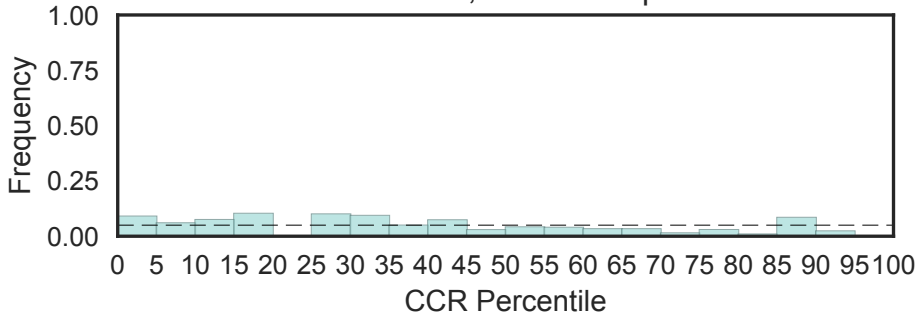

TM140 protein family  
(TM140, N=1)

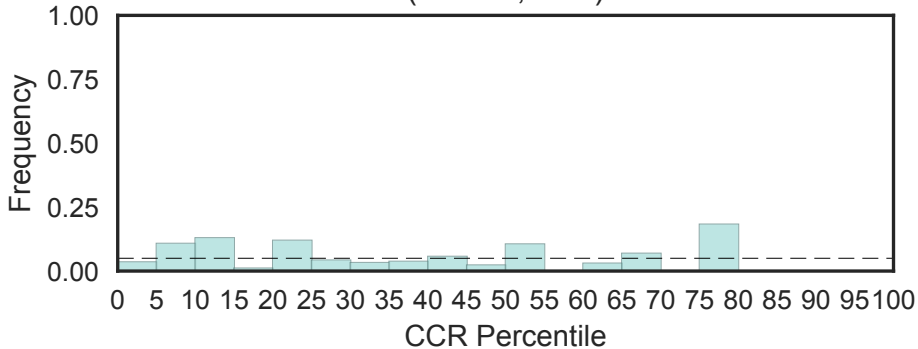

TM2 domain  
(TM2, N=4)

Fisher's OR: 1.46; Bonferroni p-val: 1

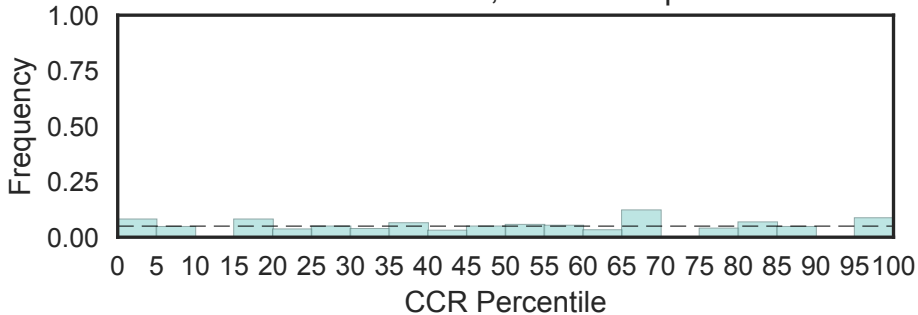

# Transmembrane protein 231 (TM231, N=1)

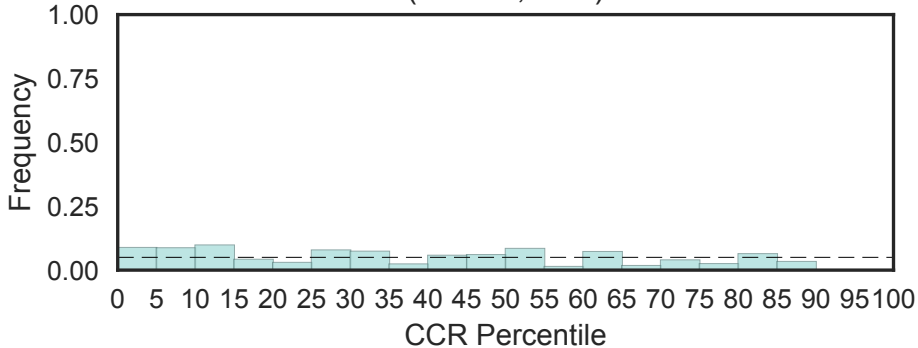

Translation machinery associated TMA7  
(TMA7, N=1)

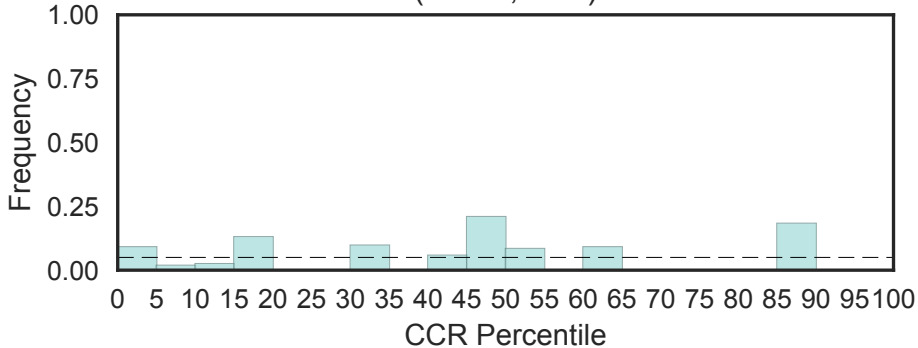

TMC domain  
(TMC, N=8)

Fisher's OR: 0.669; Bonferroni p-val: 1

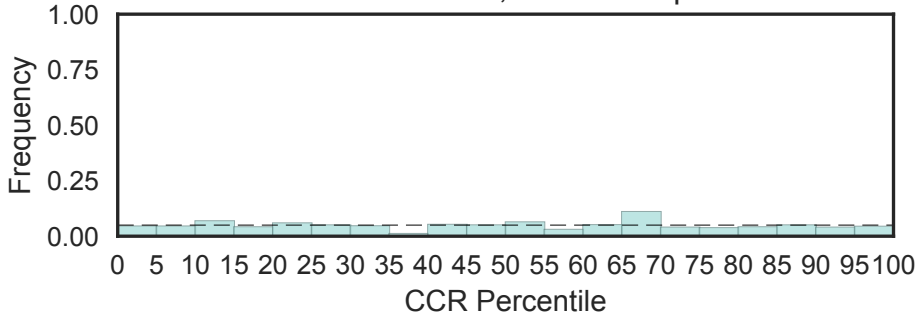

# Transmembrane and coiled-coil domain-containing protein 2 (TMCCDC2, N=1)

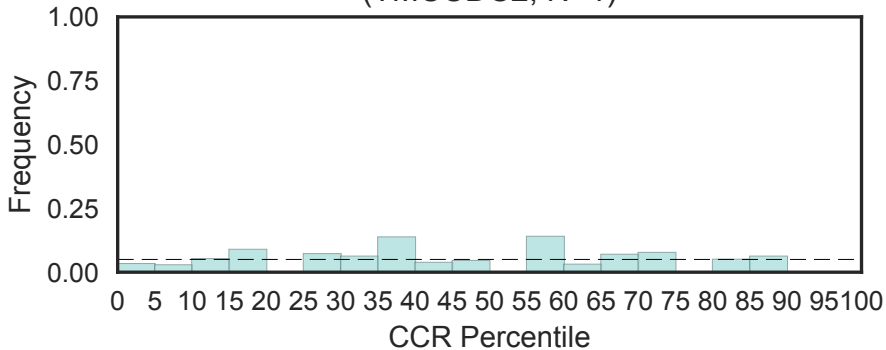

TMCO5 family  
(TMCO5, N=2)

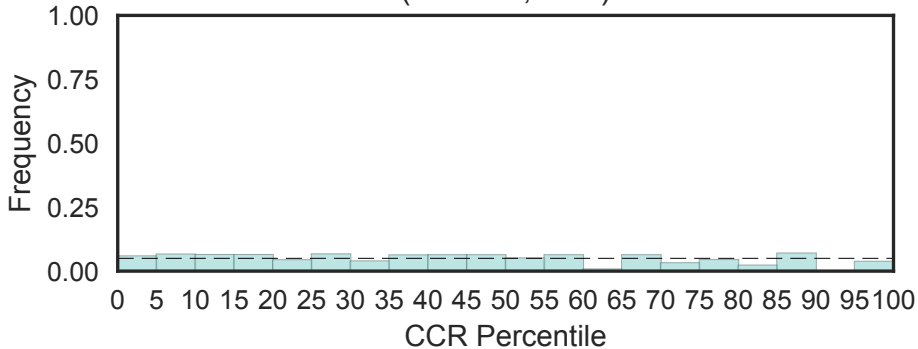



Transmembrane protein 100  
(TMEM100, N=1)

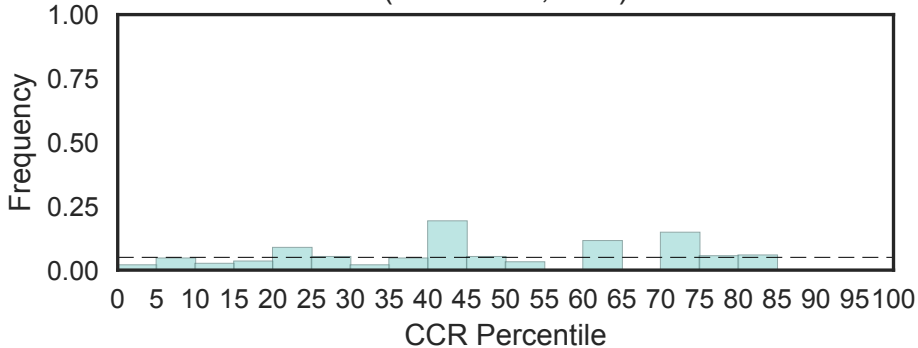

TMEM101 protein family  
(TMEM101, N=1)

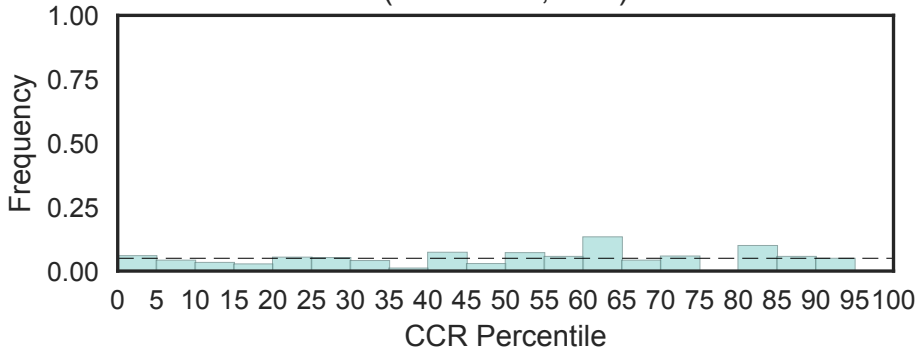

Transmembrane protein  
(TMEM107, N=1)

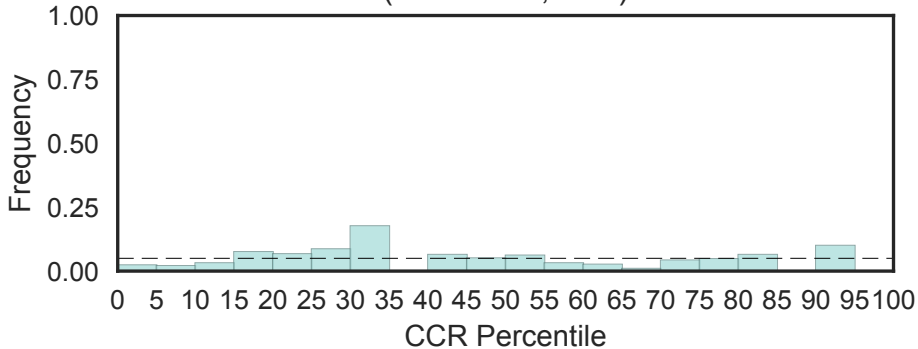

TMEM108 family  
(TMEM108, N=1)

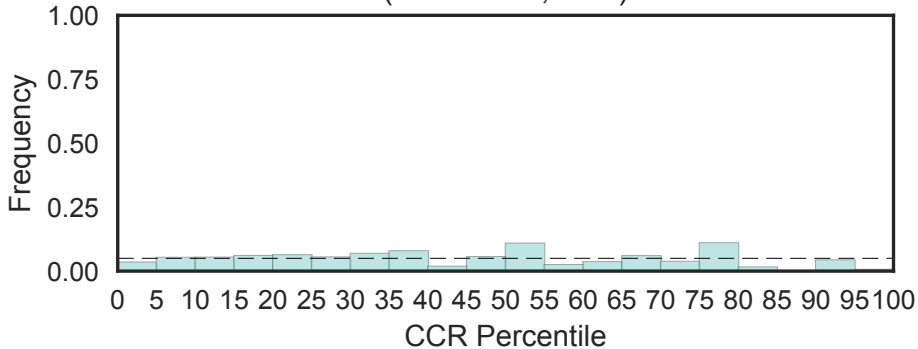

TMEM117 protein family  
(TMEM117, N=1)

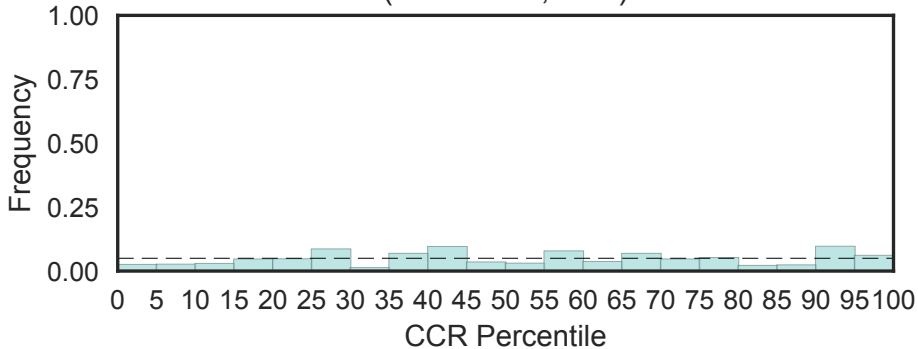

TMEM119 family  
(TMEM119, N=1)

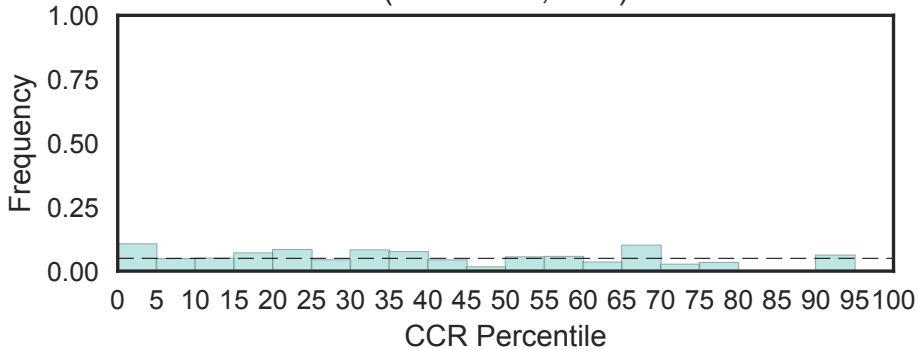

TMEM125 protein family  
(TMEM125, N=1)

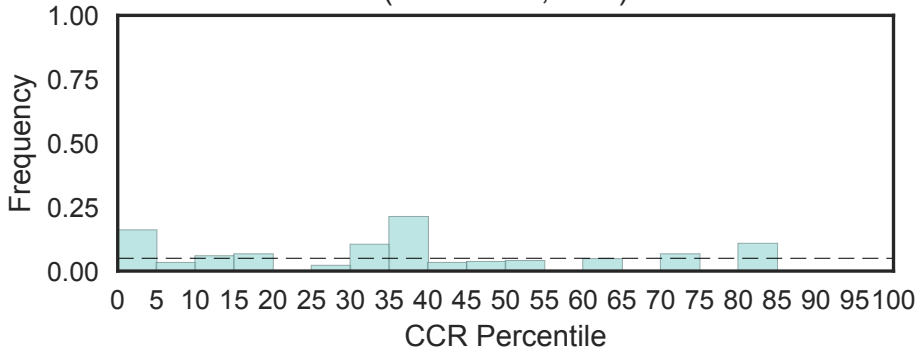

Transmembrane protein 126  
(TMEM126, N=2)

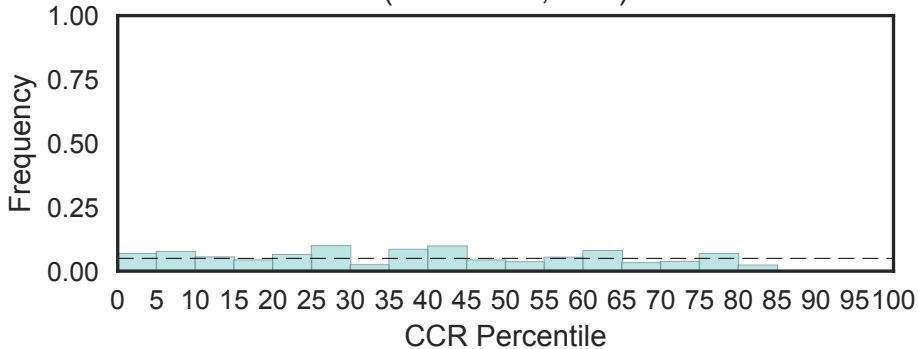



Transmembrane protein 131-like  
(TMEM131\_like, N=2)

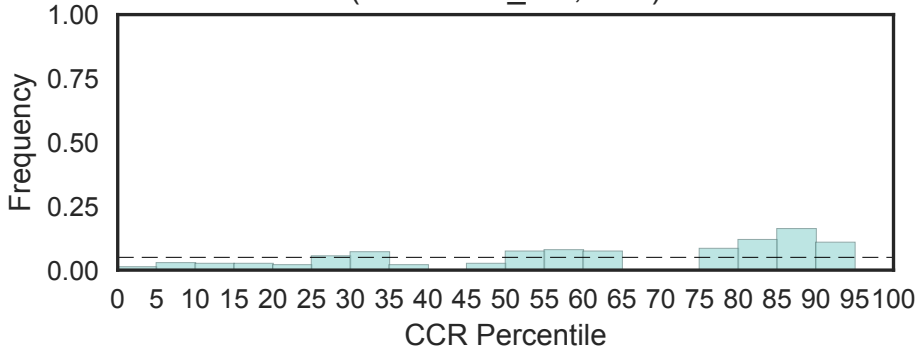

Transmembrane protein family 132  
(TMEM132, N=5)

Fisher's OR: 0.174; Bonferroni p-val: 1

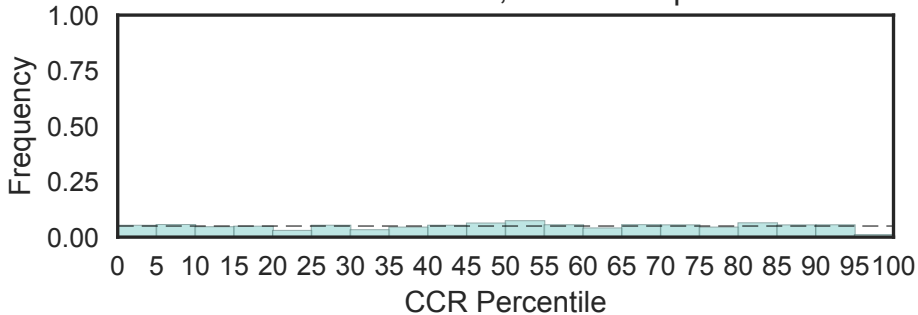

Mature oligodendrocyte transmembrane protein, TMEM132D, C-term  
(TMEM132D\_C, N=5)

Fisher's OR: 0; Bonferroni p-val: 1

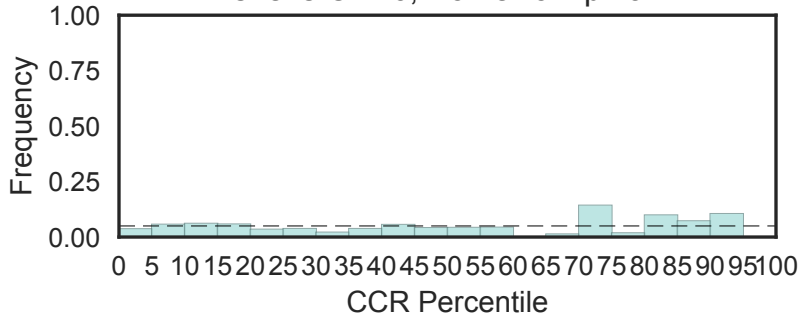

Mature oligodendrocyte transmembrane protein, TMEM132D, N-term  
(TMEM132D\_N, N=5)

Fisher's OR: 0; Bonferroni p-val: 1

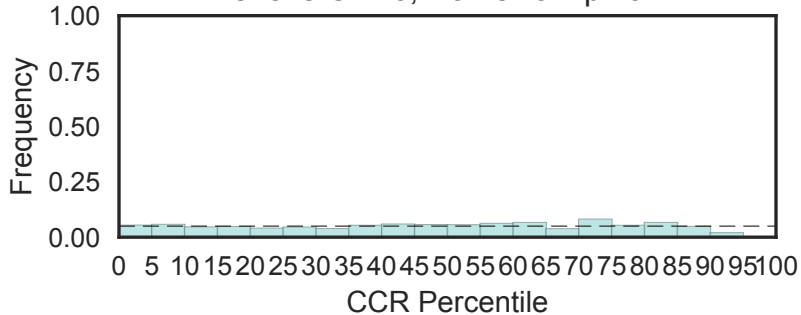

N-terminal cysteine-rich region of Transmembrane protein 135  
(TMEM135\_C\_rich, N=1)

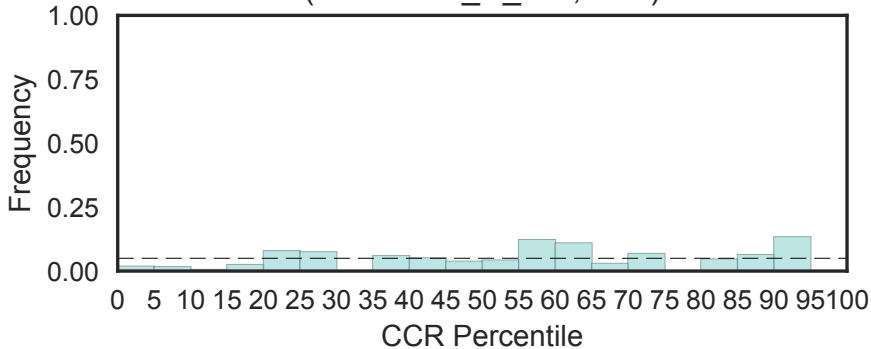

Transmembrane protein 138  
(TMEM138, N=1)

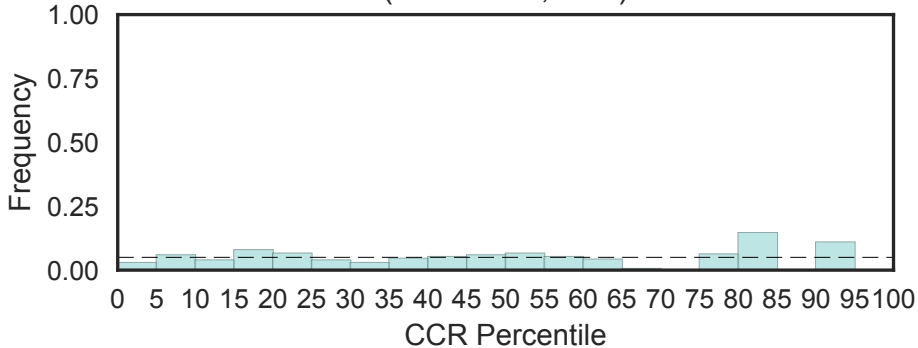

TMEM141 protein family  
(TMEM141, N=2)

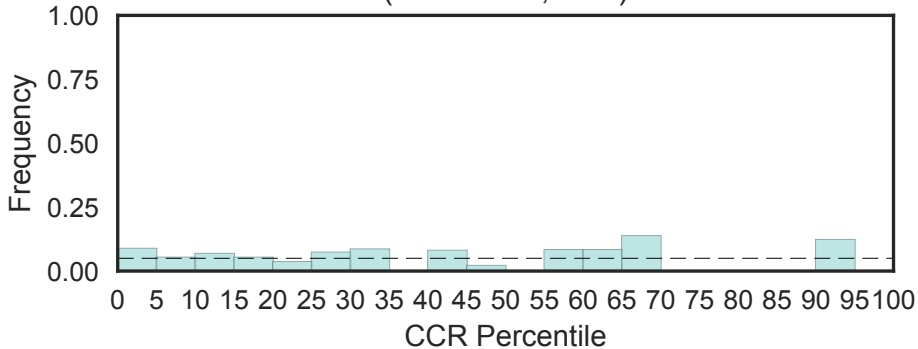

Transmembrane family, TMEM144 of transporters  
(TMEM144, N=1)

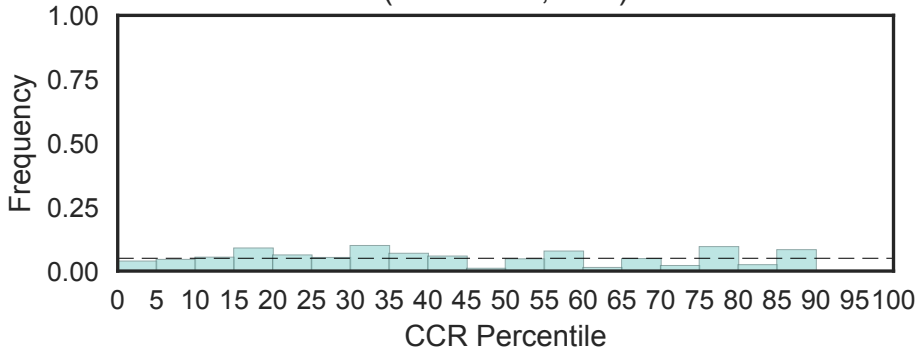



TMEM151 family  
(TMEM151, N=4)

Fisher's OR: 0.174; Bonferroni p-val: 1

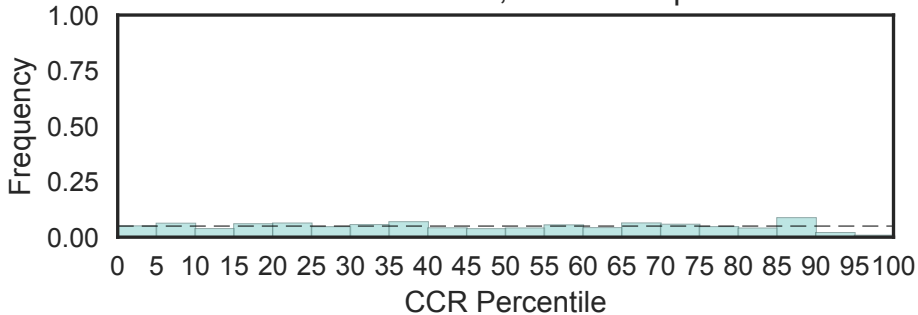

TMEM154 protein family  
(TMEM154, N=1)

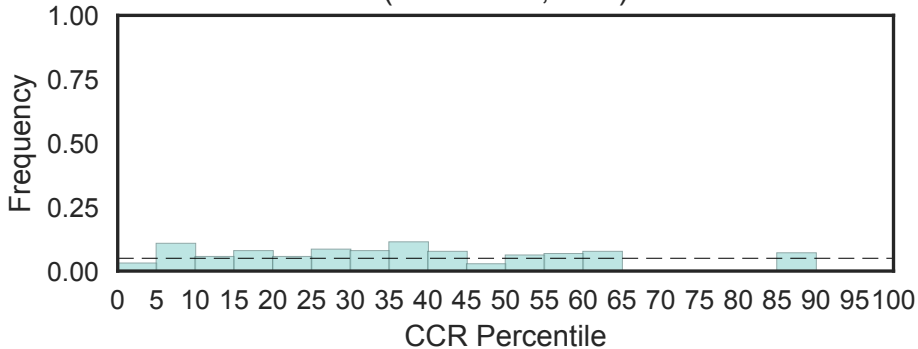

TMEM156 protein family  
(TMEM156, N=1)

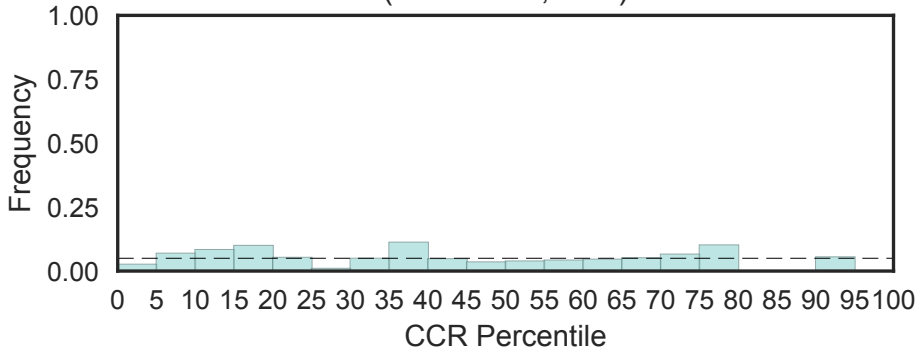

TMEM169 protein family  
(TMEM169, N=1)

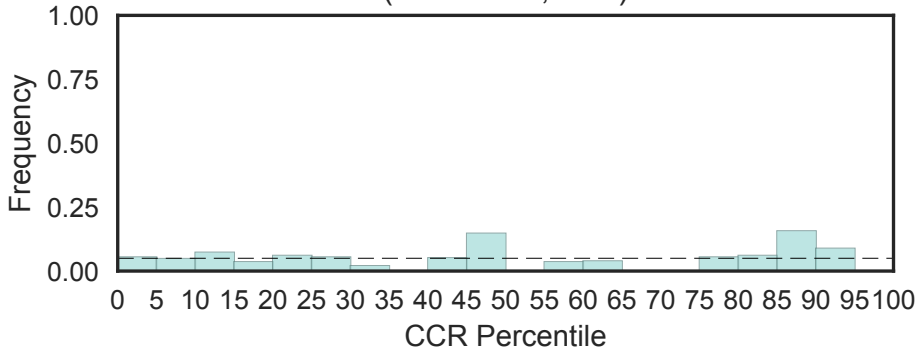

Transmembrane protein family 171  
(TMEM171, N=1)

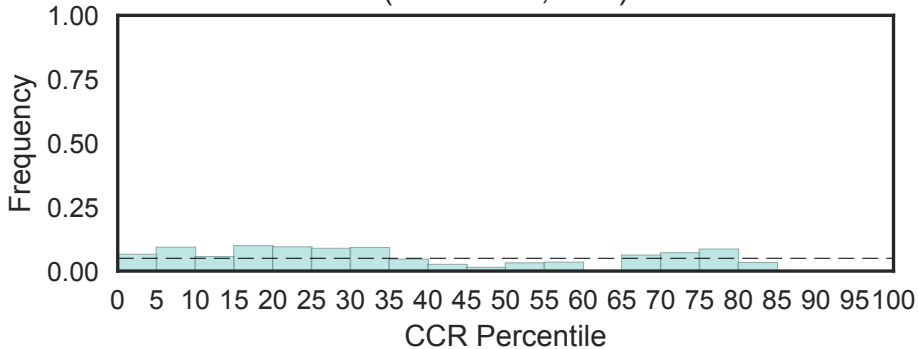

# Transmembrane protein 173 (TMEM173, N=1)

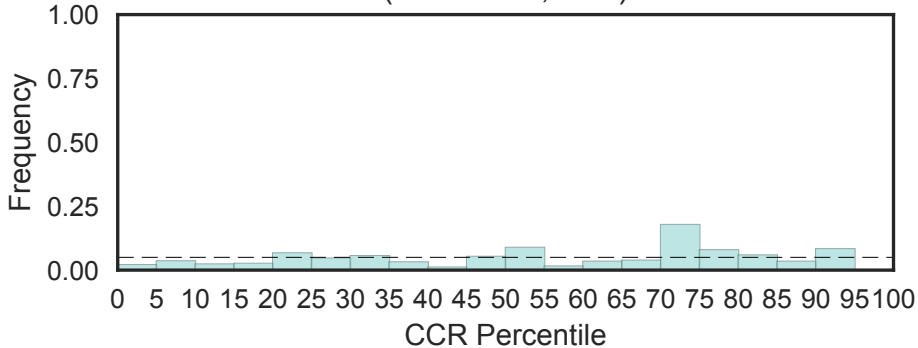

# Transmembrane protein 174 (TMEM174, N=1)

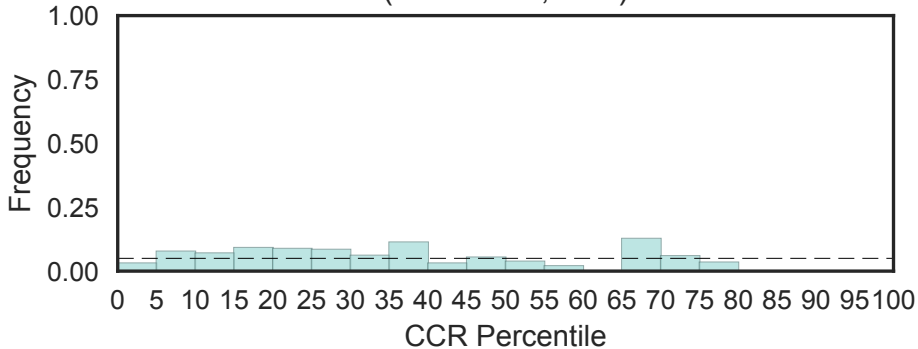

# Transmembrane protein 18 (TMEM18, N=1)

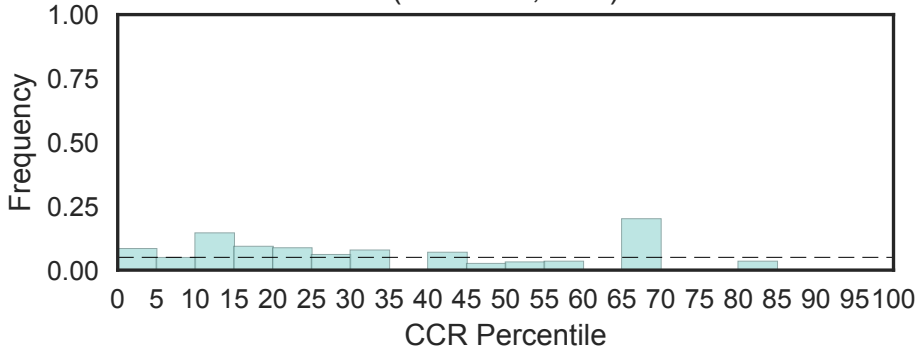



B domain of TMEM189, localisation domain  
(TMEM189\_B\_dmain, N=3)

Fisher's OR: 2.1; Bonferroni p-val: 1

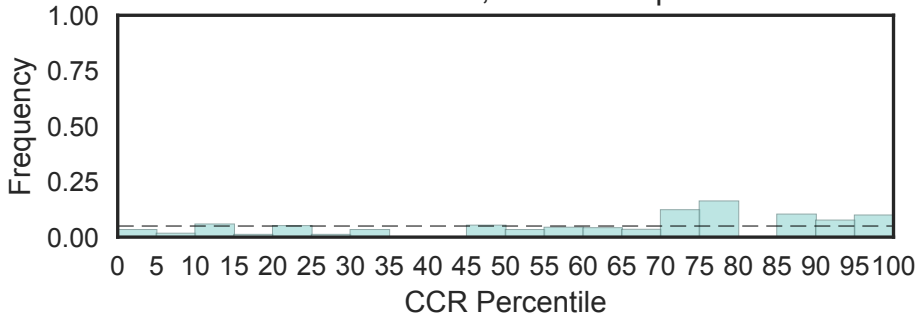

Transmembrane protein 190  
(TMEM190, N=1)

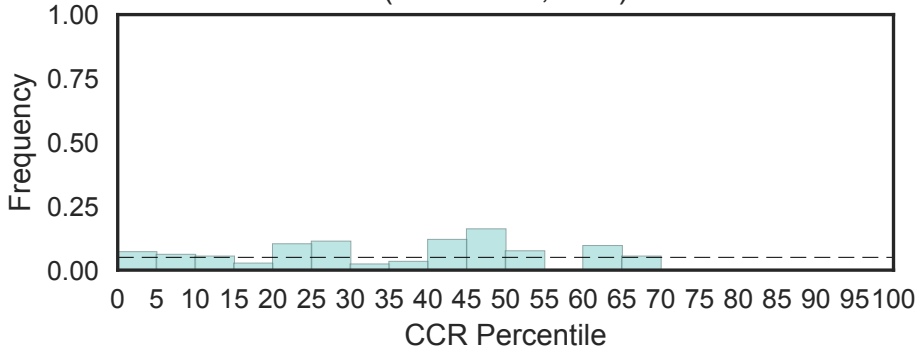

TMEM192 family  
(TMEM192, N=1)

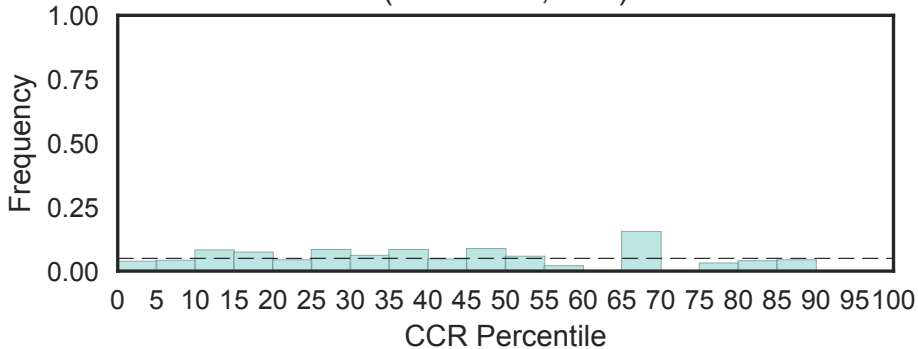

TMEM206 protein family  
(TMEM206, N=1)

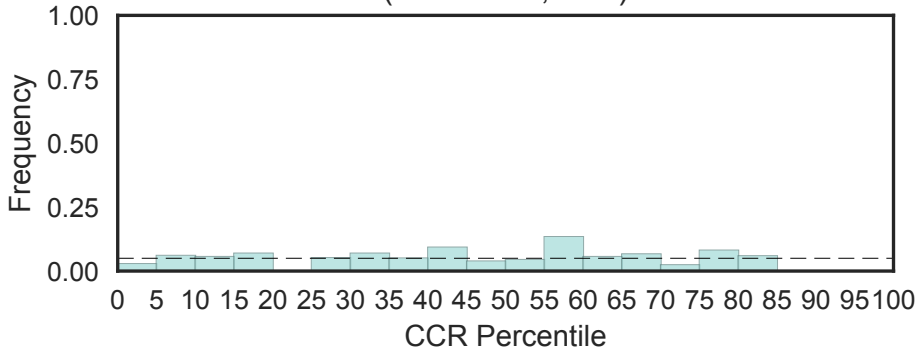

TMEM213 family  
(TMEM213, N=1)

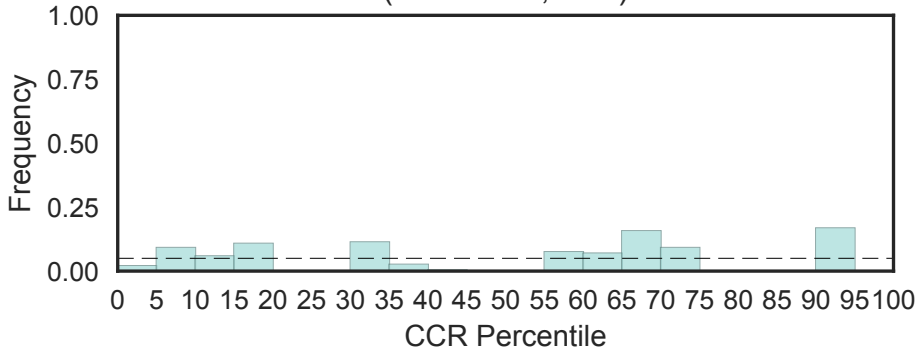

TMEM214, C-terminal, caspase 4 activator  
(TMEM214, N=1)

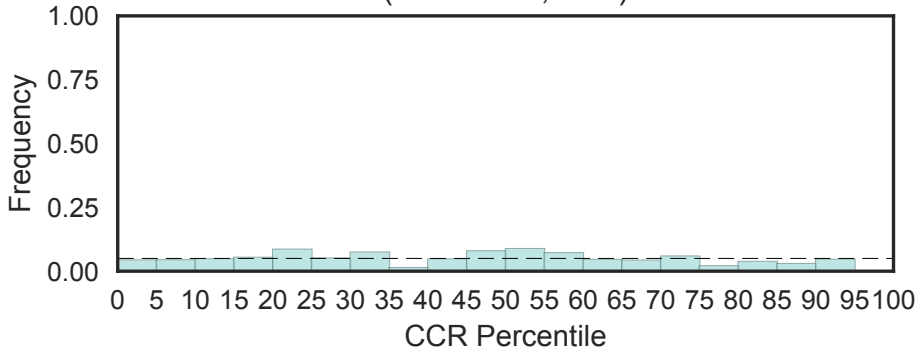

TMEM215 family  
(TMEM215, N=1)

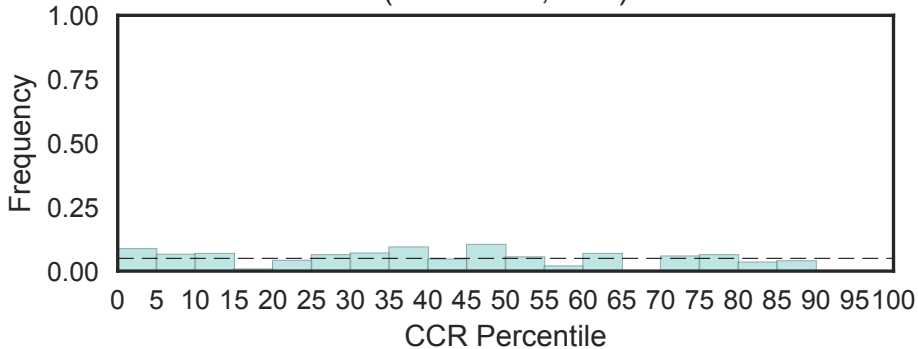

# Transmembrane 219 (TMEM219, N=2)

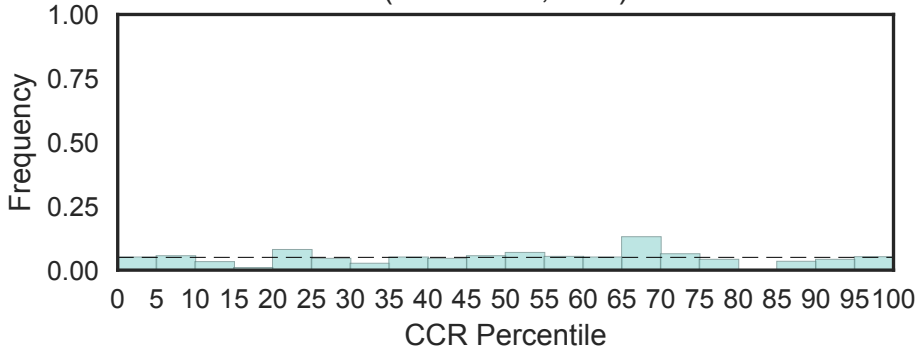



Transmembrane family 220, helix  
(TMEM220, N=1)

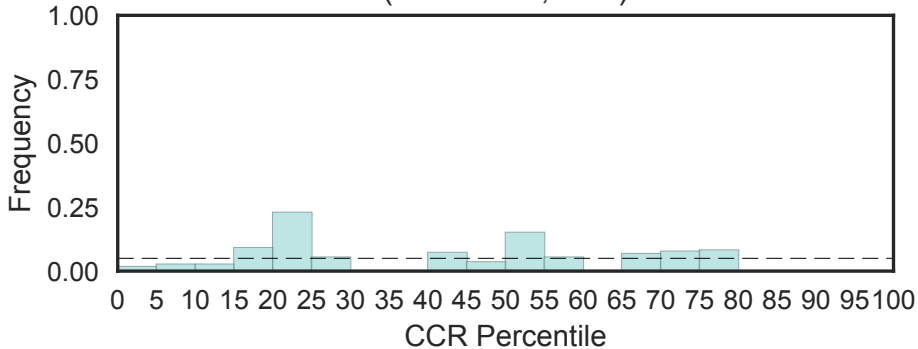

Transmembrane protein 223  
(TMEM223, N=1)

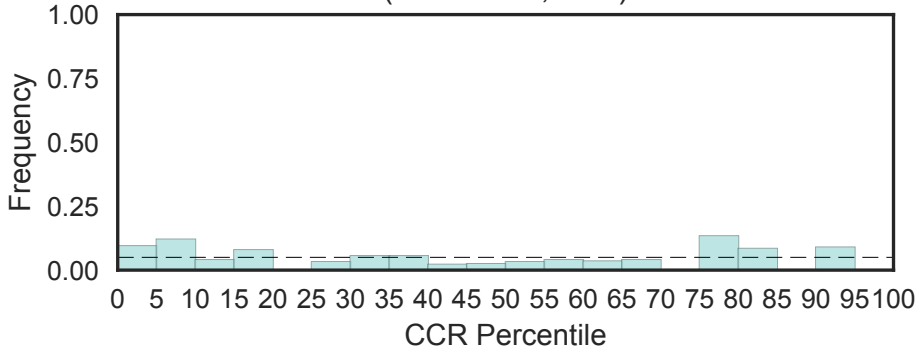

Transmembrane protein family 232  
(TMEM232, N=1)

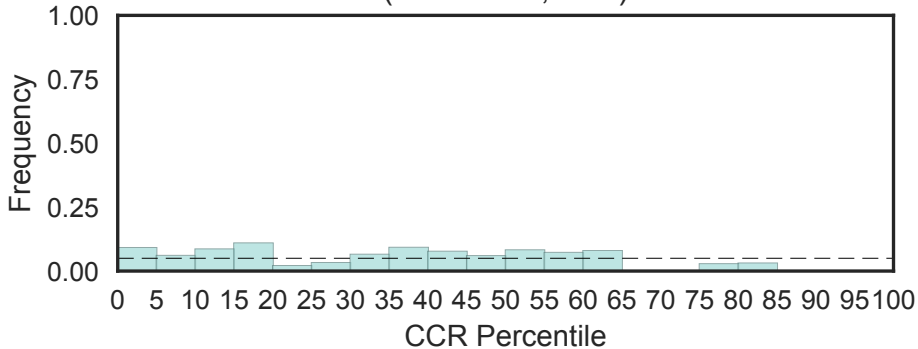

Putative transmembrane family 234  
(TMEM234, N=1)

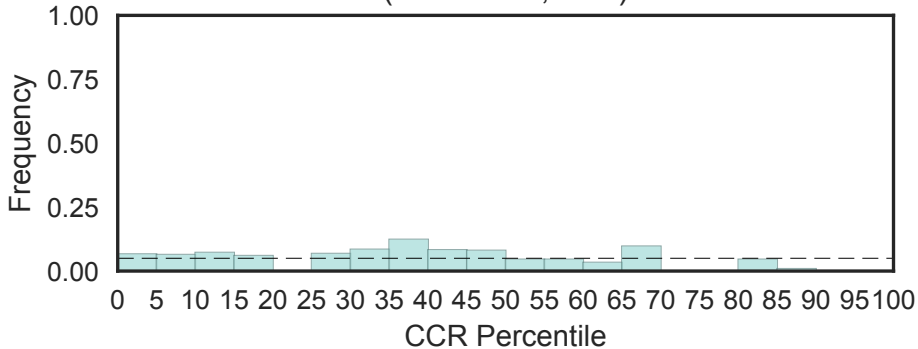

# Transmembrane protein 237 (TMEM237, N=1)

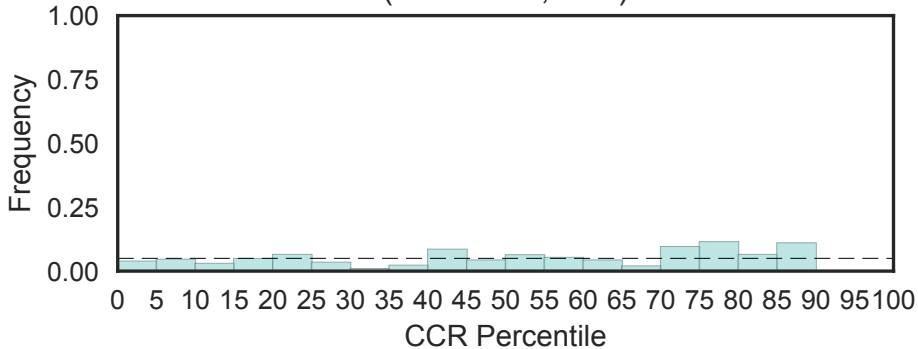

Transmembrane protein 239 family  
(TMEM239, N=1)

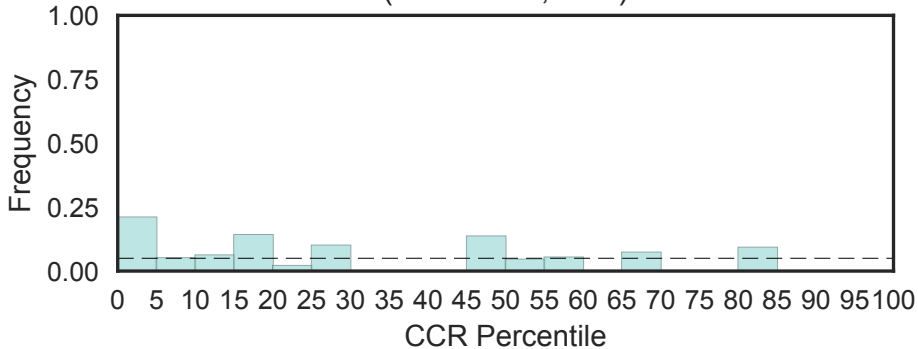

TMEM240 family  
(TMEM240, N=1)

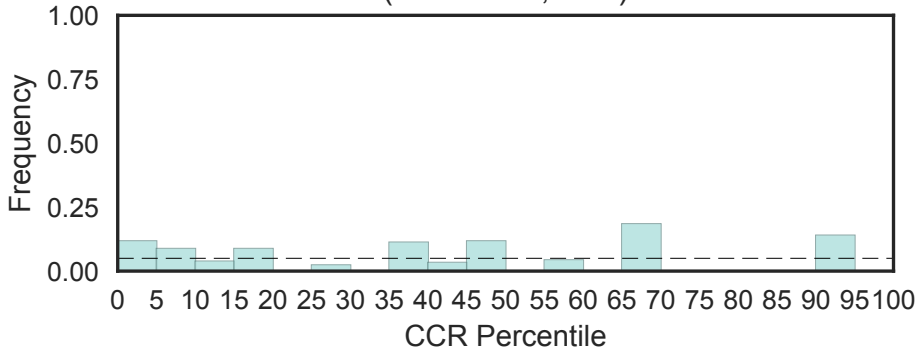

# Transmembrane protein 251 (TMEM251, N=2)

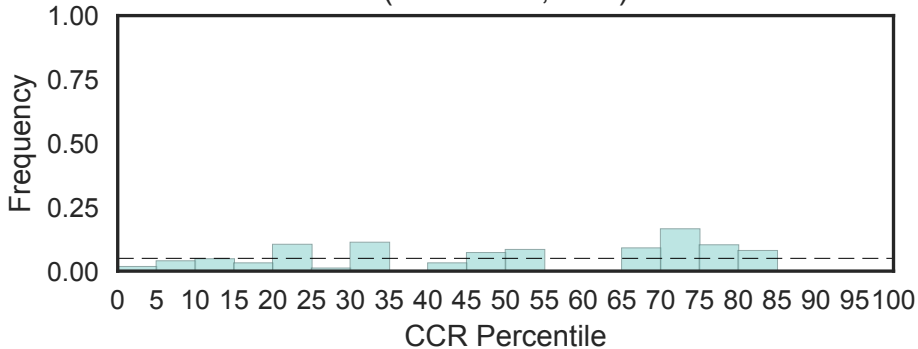



Transmembrane protein 252 family  
(TMEM252, N=1)

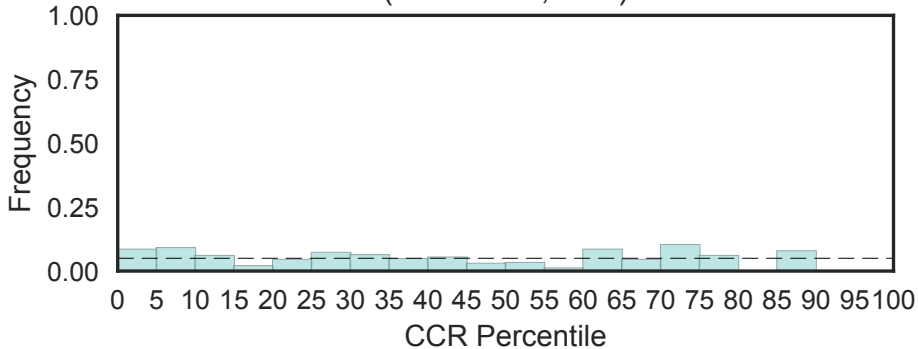

# Voltage-dependent calcium channel gamma-like subunit protein family (TMEM37, N=1)

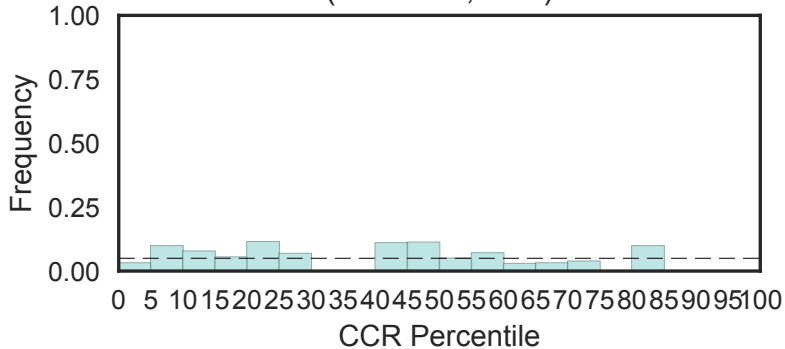

Transmembrane protein 40 family  
(TMEM40, N=1)

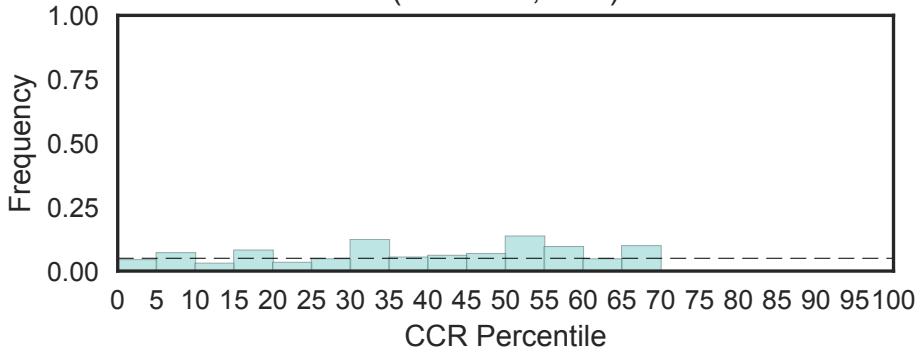

Transmembrane protein 43  
(TMEM43, N=1)

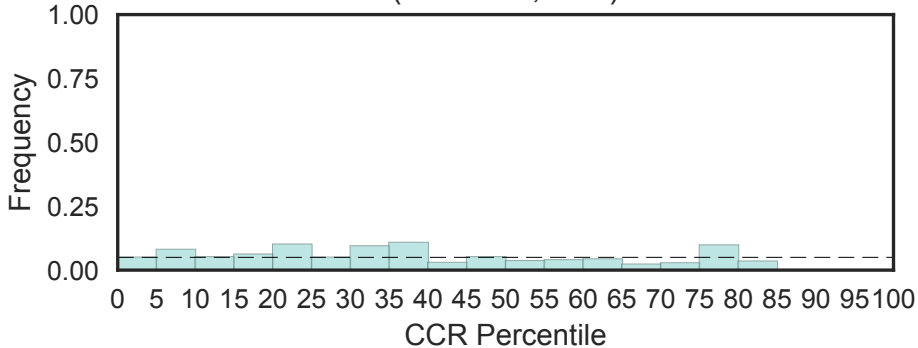

Transmembrane protein 51  
(TMEM51, N=1)

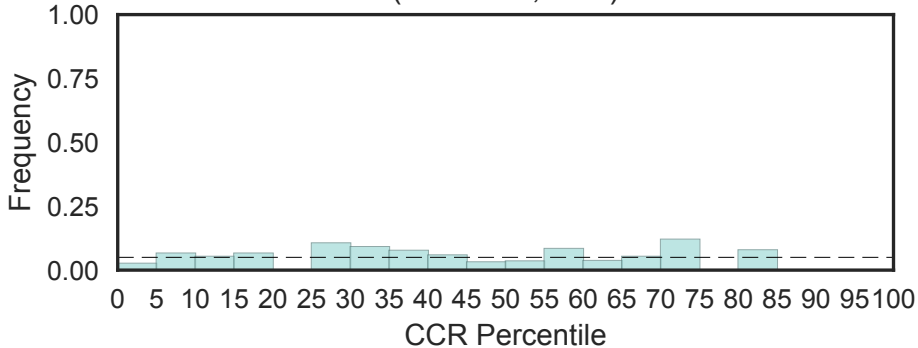

Transmembrane 52  
(TMEM52, N=2)

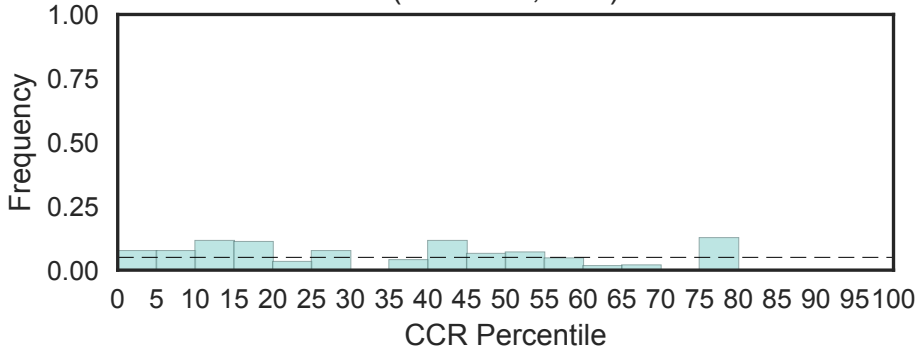

TMEM61 protein family  
(TMEM61, N=1)

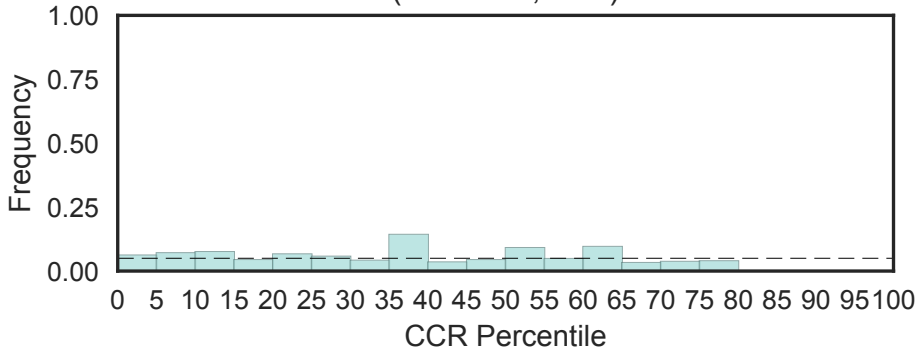

Transmembrane protein 65  
(TMEM65, N=1)

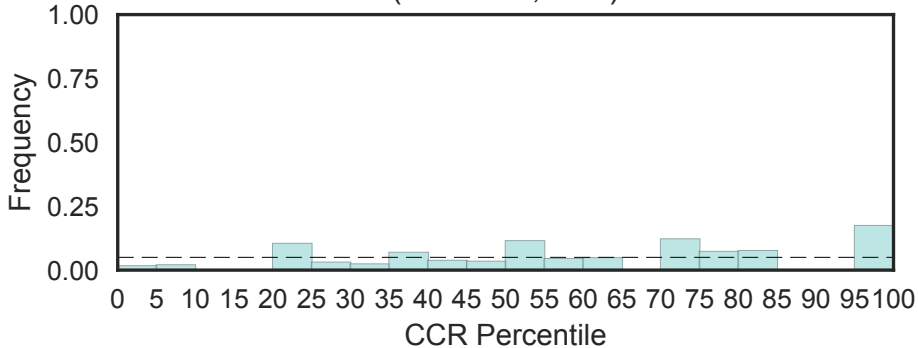



# Assembly, mitochondrial proton-transport ATP synth complex (TMEM70, N=1)

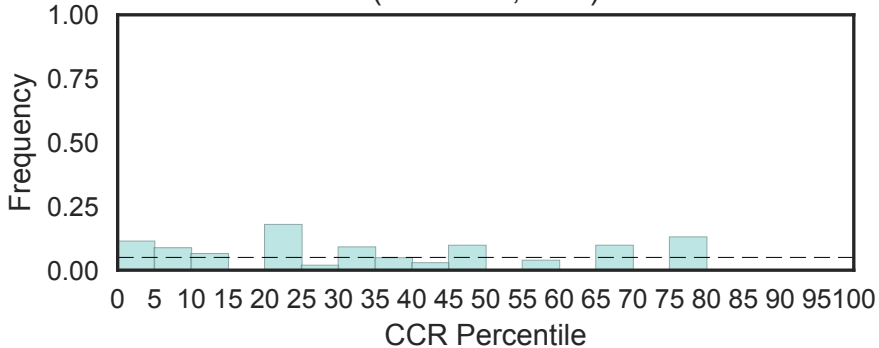

TMEM71 protein family  
(TMEM71, N=1)

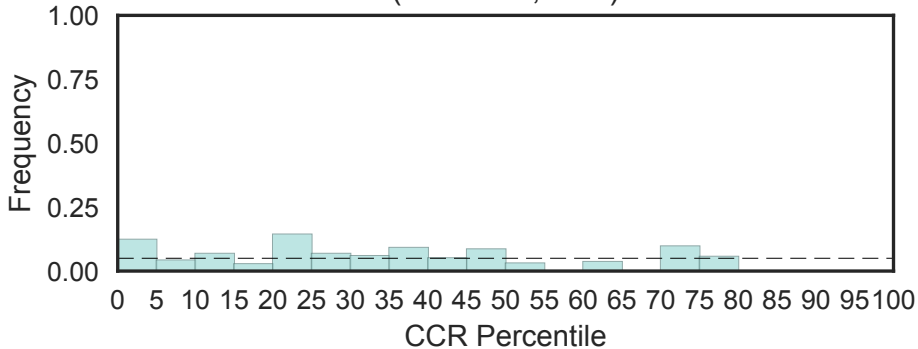

Transmembrane protein family 72  
(TMEM72, N=1)

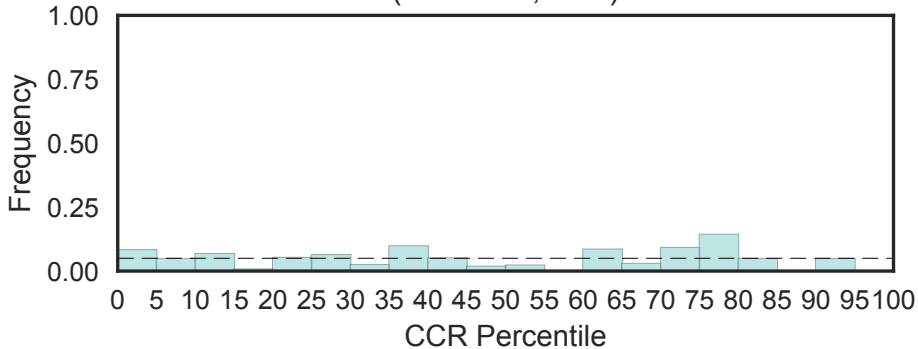

Transmembrane protein 82  
(TMEM82, N=1)

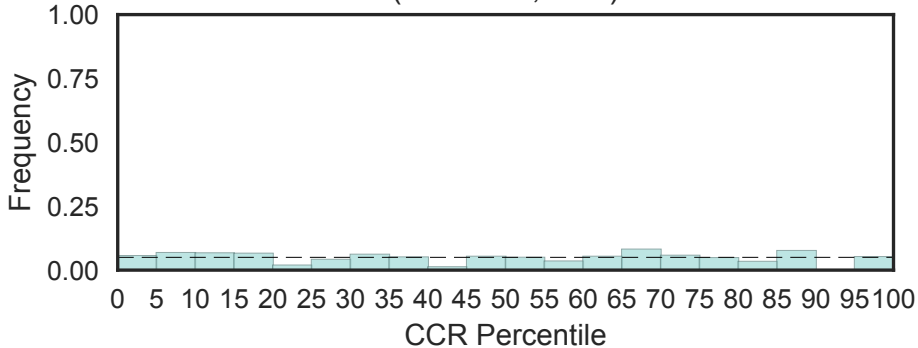

TMEM89 protein family  
(TMEM89, N=1)

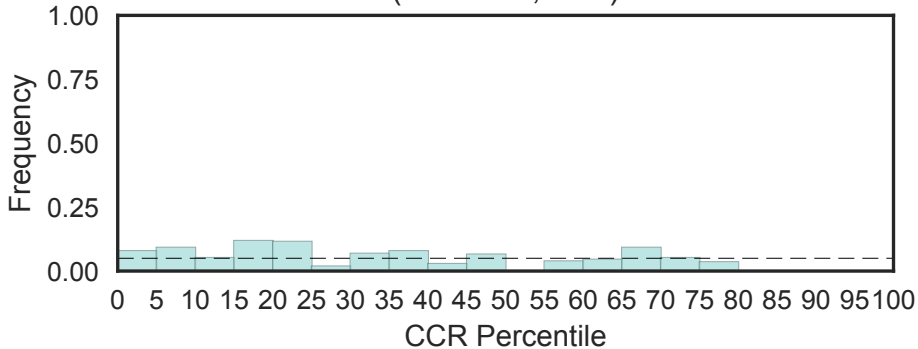

TMEM95 family  
(TMEM95, N=1)

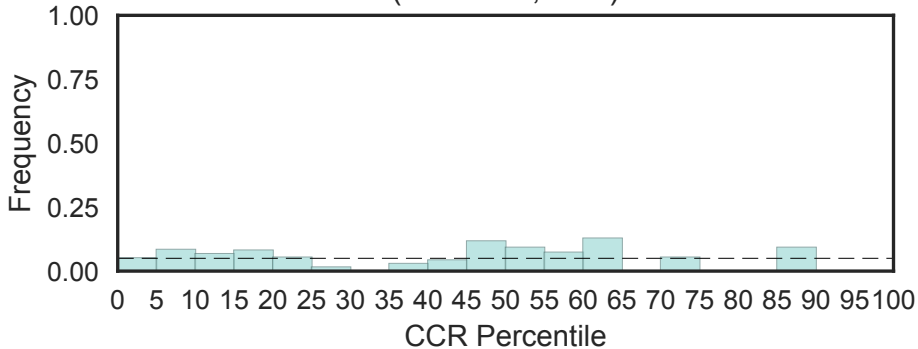

TATA element modulatory factor 1 DNA binding  
(TMF\_DNA\_bd, N=1)

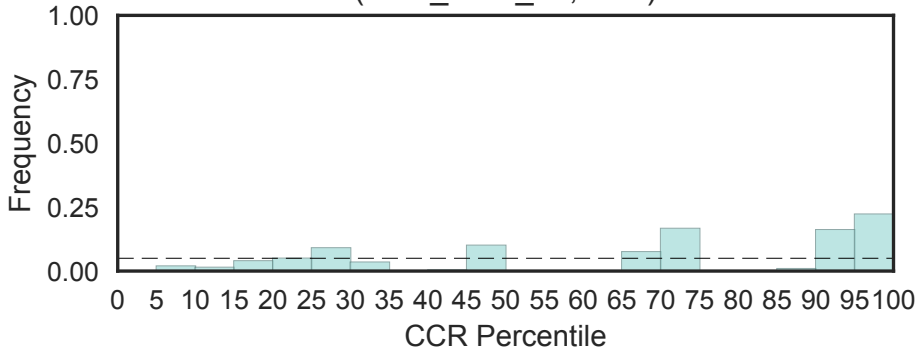

TATA element modulatory factor 1 TATA binding  
(TMF\_TATA\_bd, N=1)

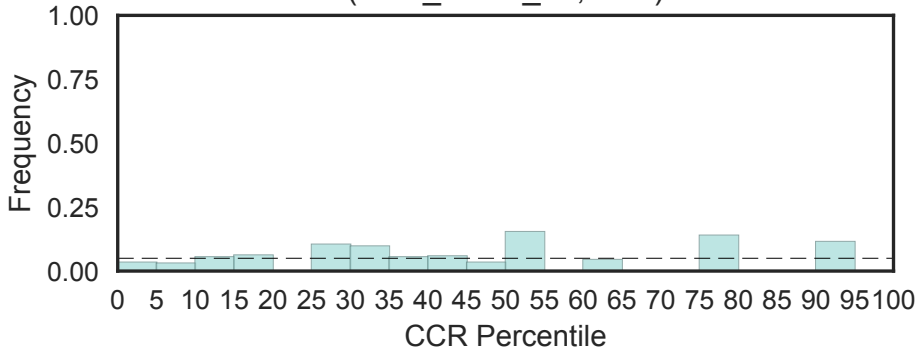



TMIE protein  
(TMIE, N=1)

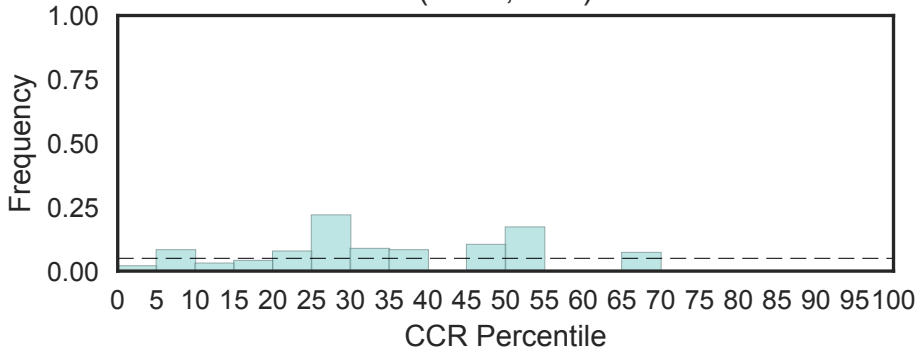

TMPIT-like protein  
(TMPIT, N=1)

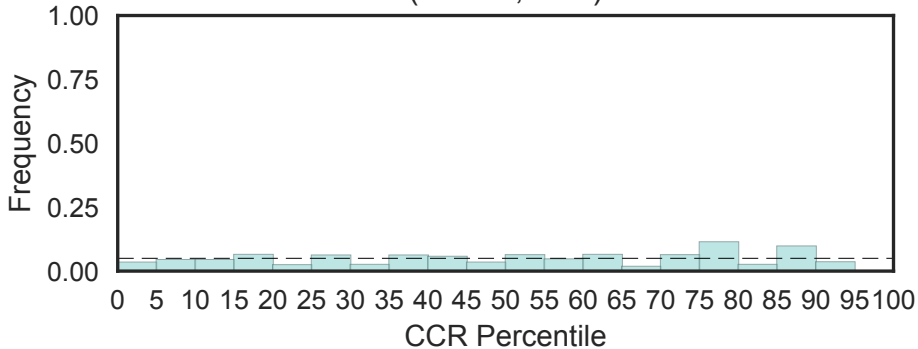

TNF(Tumour Necrosis Factor) family  
(TNF, N=18)

Fisher's OR: 0.821; Bonferroni p-val: 1

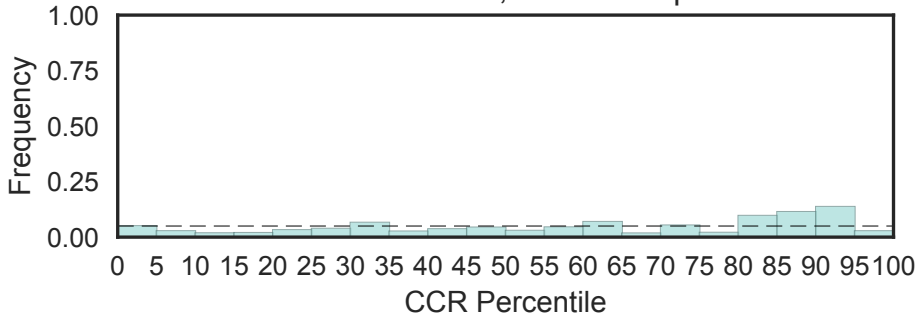

TNFR/NGFR cysteine-rich region  
(TNFR\_c6, N=43)  
Fisher's OR: 0.508; Bonferroni p-val: 1

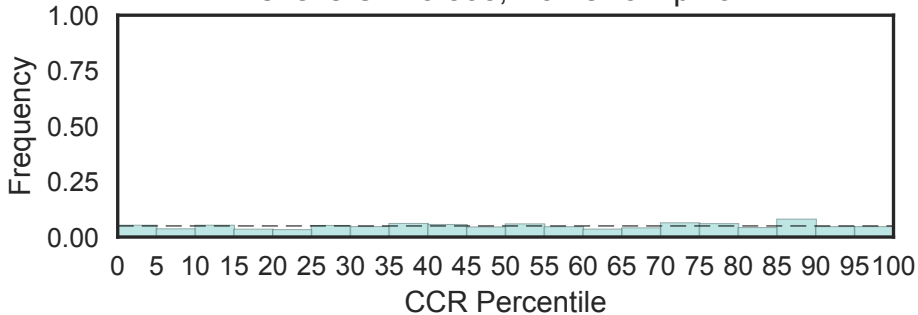

TNRC6-PABC binding domain  
(TNRC6-PABC\_bdg, N=4)  
Fisher's OR: 1.3; Bonferroni p-val: 1

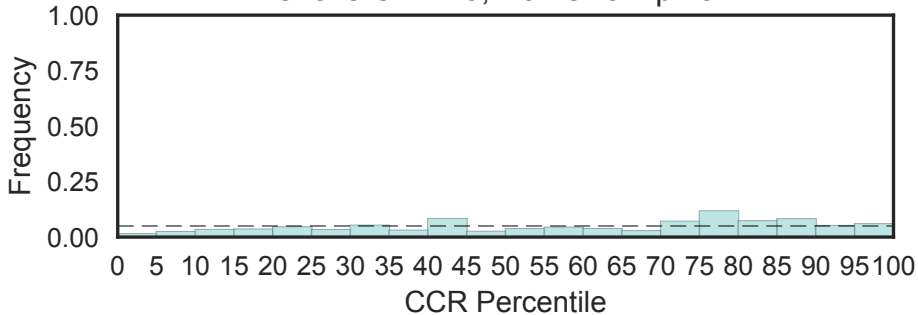

Tyrosine hydroxylase N terminal  
(TOH\_N, N=2)

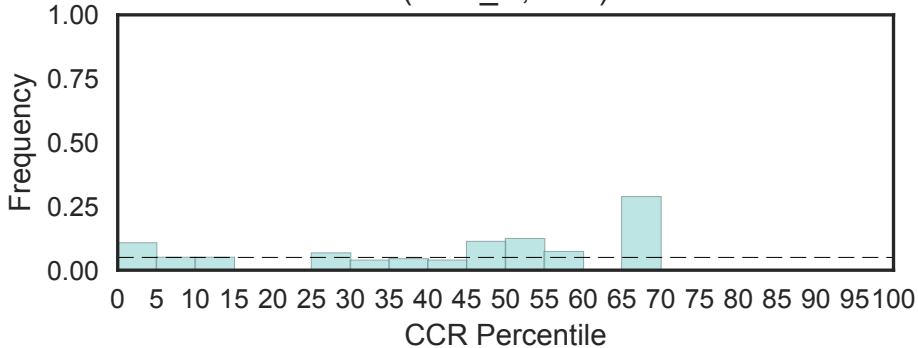

Mitochondrial import receptor subunit TOM6 homolog  
(TOM6p, N=1)

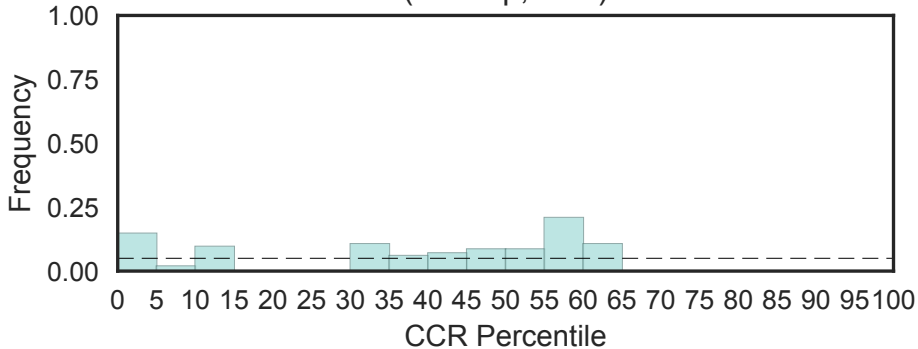

Mitochondrial import receptor subunit TOM5 homolog  
(TOM\_sub5, N=1)

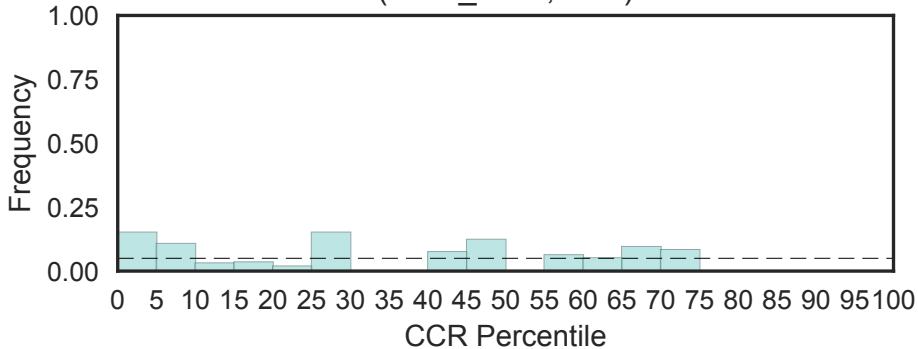



C-terminal associated domain of TOPRIM  
(TOPRIM\_C, N=2)

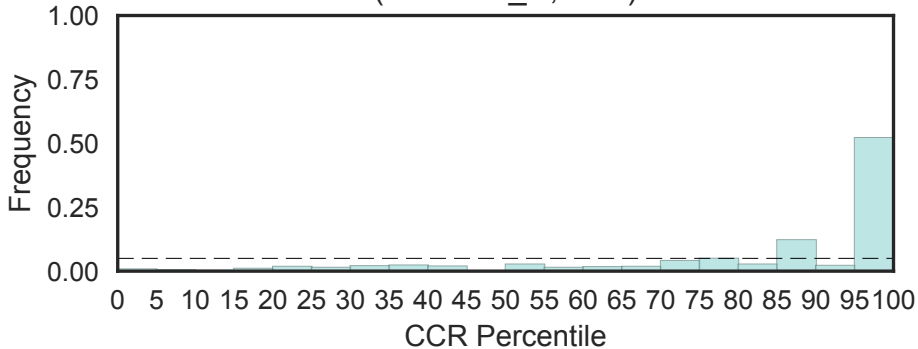

Transducer of regulated CREB activity, C terminus  
(TORC\_C, N=3)

Fisher's OR: 1.24; Bonferroni p-val: 1

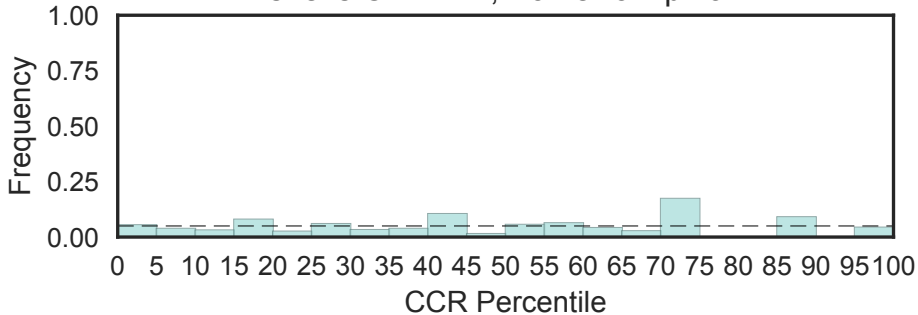

Transducer of regulated CREB activity middle domain  
(TORC\_M, N=3)

Fisher's OR: 1.47; Bonferroni p-val: 1

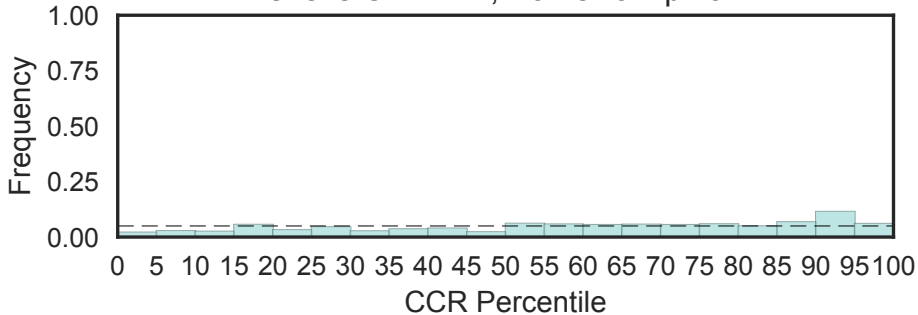

Transducer of regulated CREB activity, N terminus  
(TORC\_N, N=3)

Fisher's OR: 0; Bonferroni p-val: 1

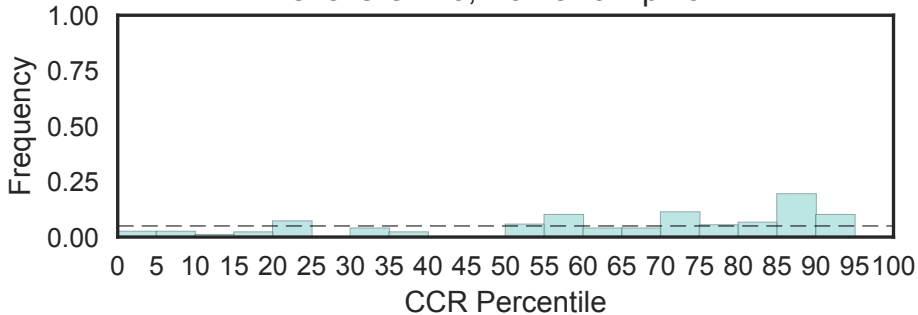

# Nuclear transition protein 1 (TP1, N=1)

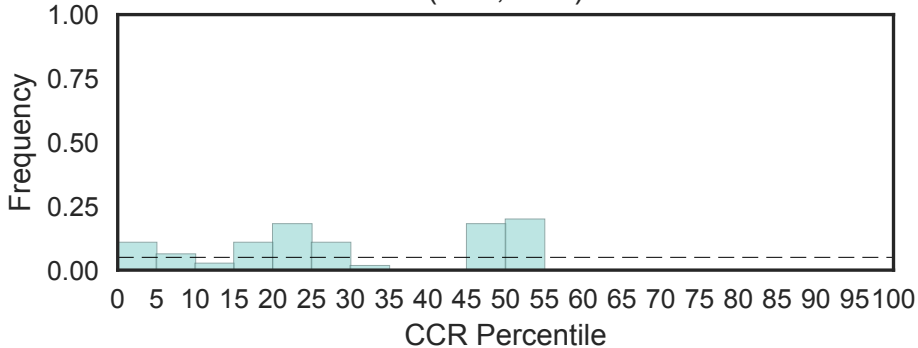

# Nuclear transition protein 2 (TP2, N=1)

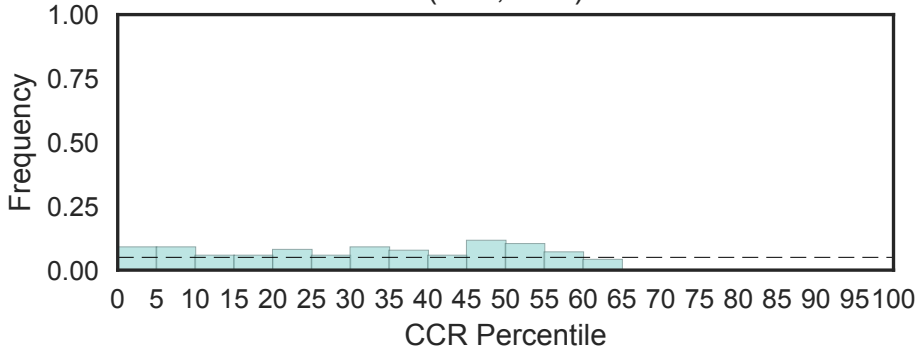

Cellular tumour antigen p53-inducible 5  
(TP53IP5, N=1)

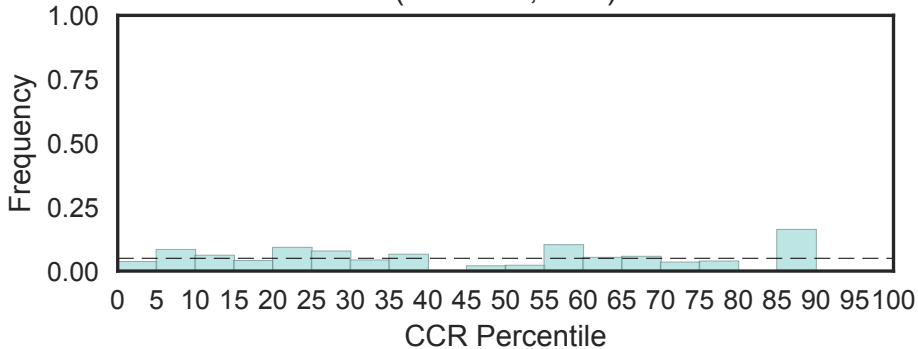

Type IIB DNA topoisomerase  
(TP6A\_N, N=1)

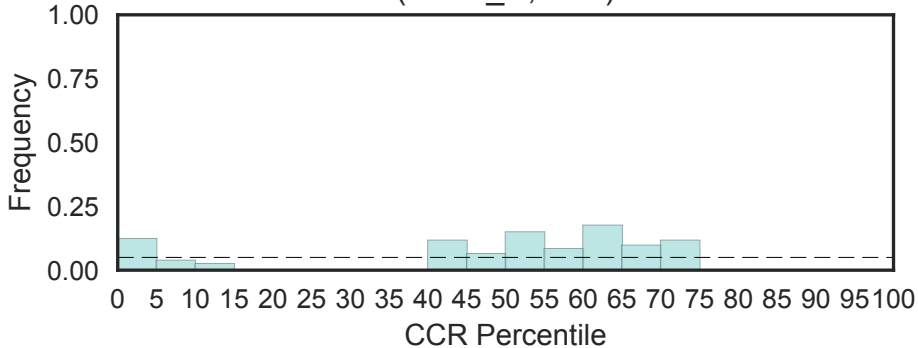



Protein of unknown function TPD sequence-motif  
(TPD, N=1)

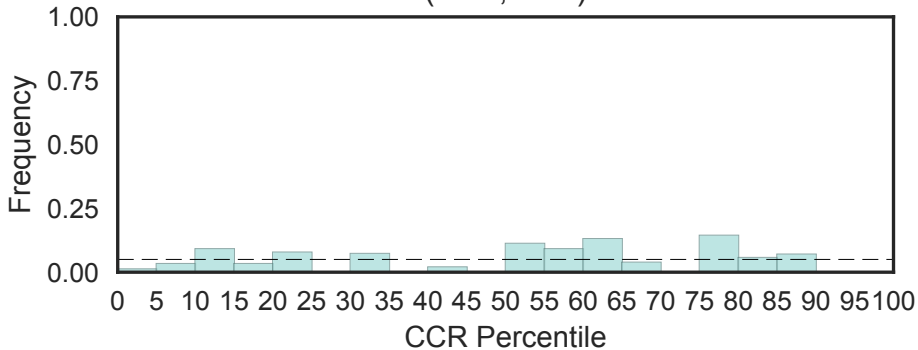

Tumour protein D52 family  
(TPD52, N=5)

Fisher's OR: 0.769; Bonferroni p-val: 1

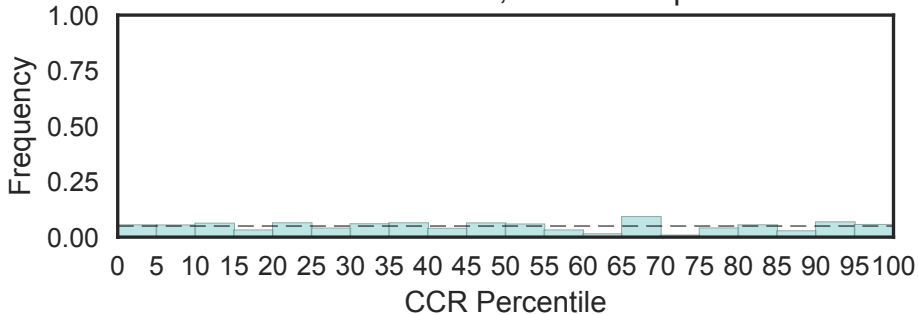

Trichohyalin-plectin-homology domain  
(TPH, N=5)

Fisher's OR: 0; Bonferroni p-val: 1

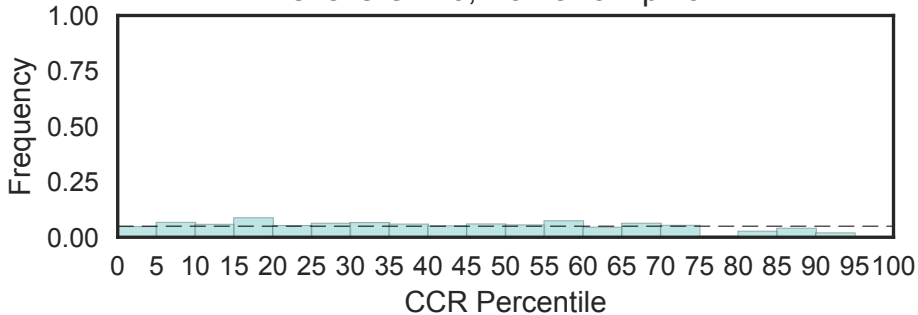

p53-regulated apoptosis-inducing protein 1  
(TPIP1, N=1)

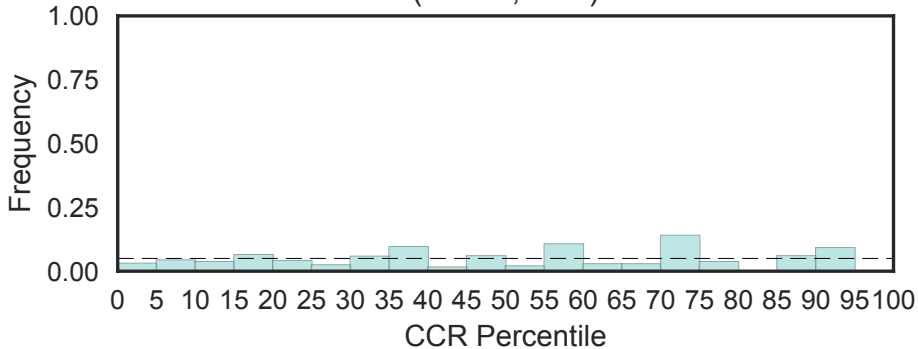

Tyrosine-protein kinase receptor C2 Ig-like domain  
(TPKR\_C2, N=3)

Fisher's OR: 2.4; Bonferroni p-val: 1

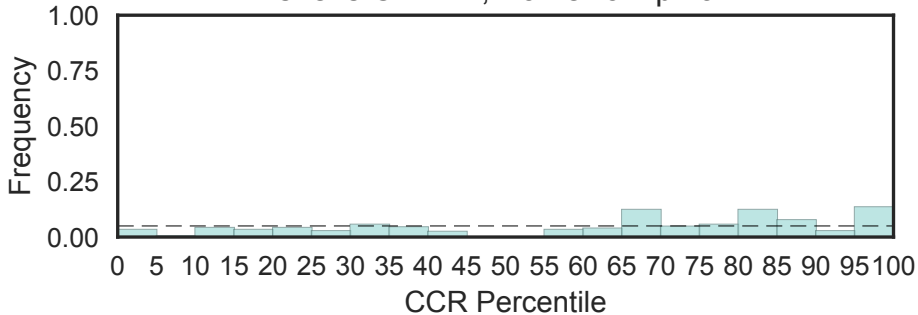

Thiamin pyrophosphokinase, vitamin B1 binding domain  
(TPK\_B1\_binding, N=1)

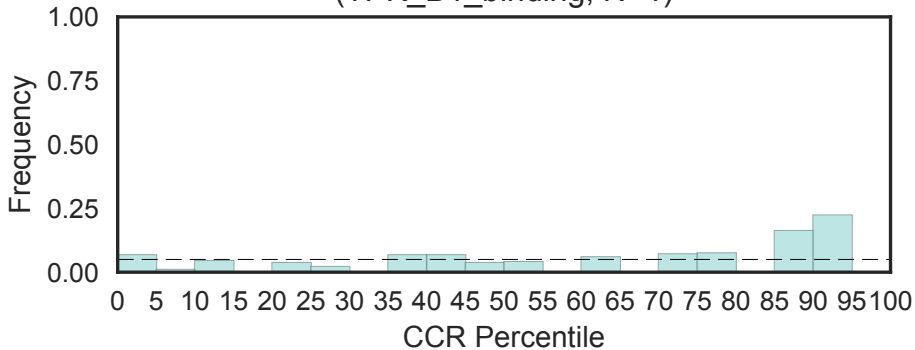

Thiamin pyrophosphokinase, catalytic domain  
(TPK\_catalytic, N=1)

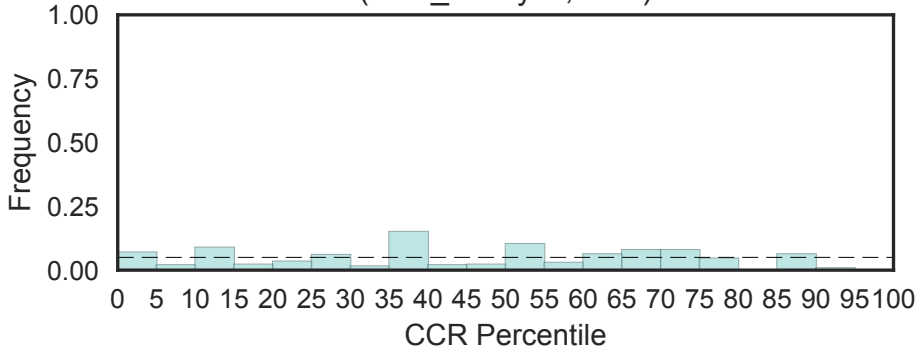

# Thiopurine S-methyltransferase (TPMT) (TPMT, N=1)

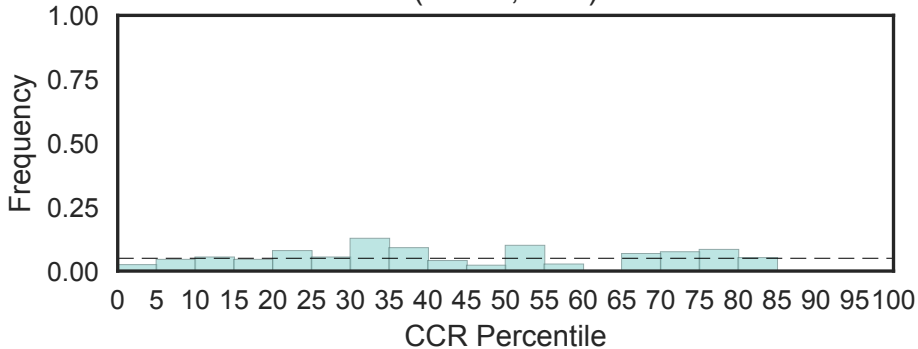



Shelterin complex subunit, TPP1/ACD  
(TPP1, N=1)

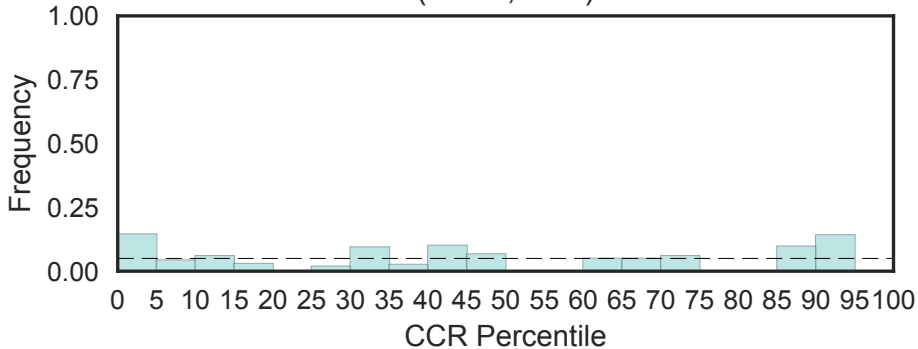

Tripeptidyl peptidase II  
(TPPII, N=1)

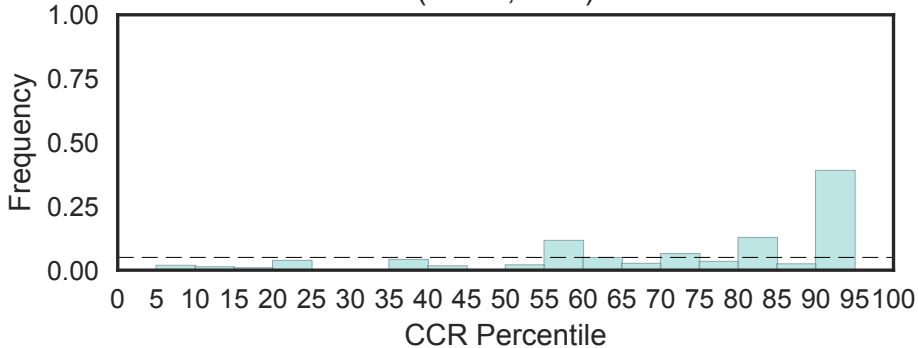

Thiamine pyrophosphate enzyme, C-terminal TPP binding domain  
(TPP\_enzyme\_C, N=2)

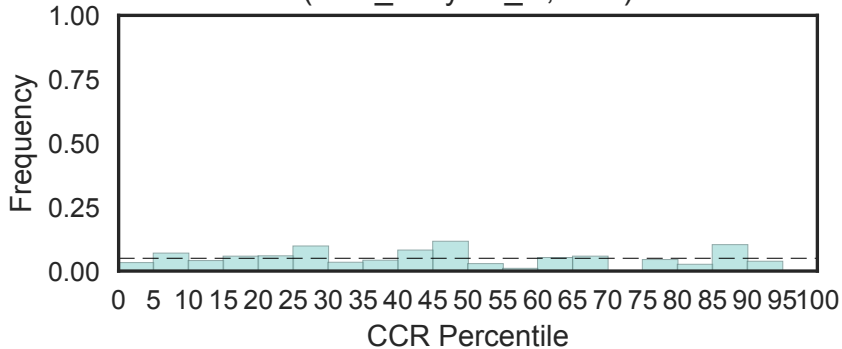

Thiamine pyrophosphate enzyme, central domain  
(TPP\_enzyme\_M, N=2)

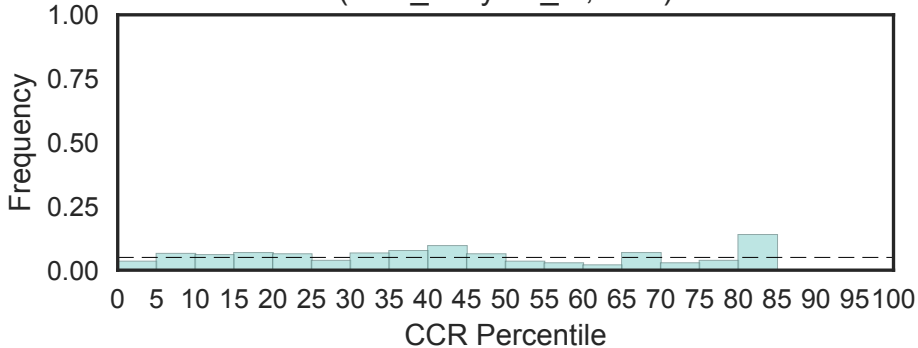

Thiamine pyrophosphate enzyme, N-terminal TPP binding domain  
(TPP\_enzyme\_N, N=2)

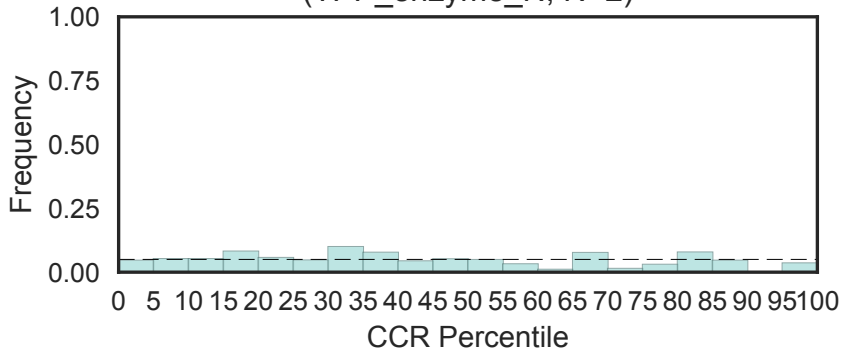

Tetratricopeptide repeat  
(TPR\_1, N=42)

Fisher's OR: 2.53; Bonferroni p-val: 1

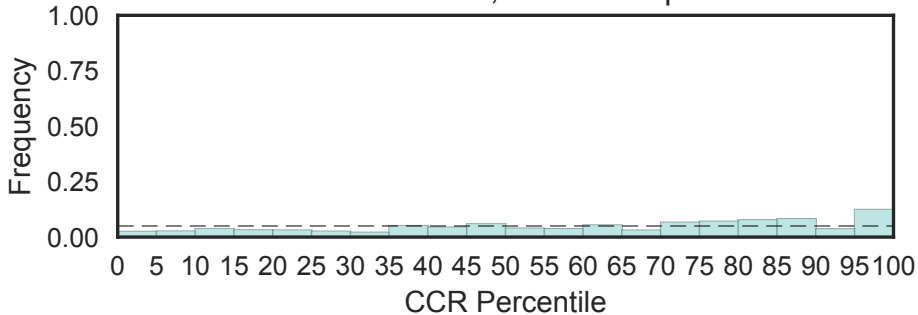

Tetratricopeptide repeat  
(TPR\_10, N=54)

Fisher's OR: 2.38; Bonferroni p-val: 1

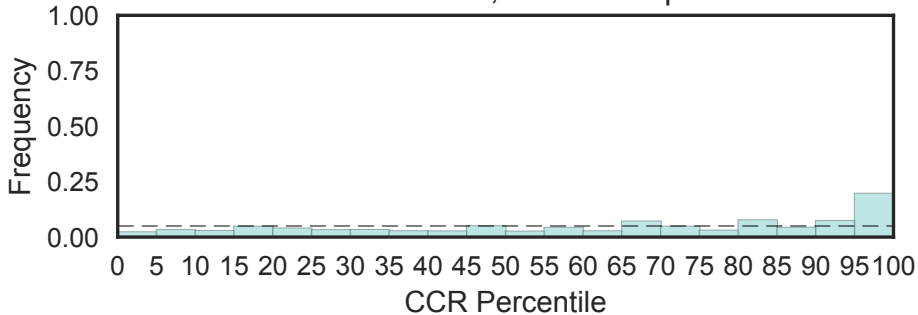

TPR repeat  
(TPR\_11, N=19)

Fisher's OR: 1.86; Bonferroni p-val: 1

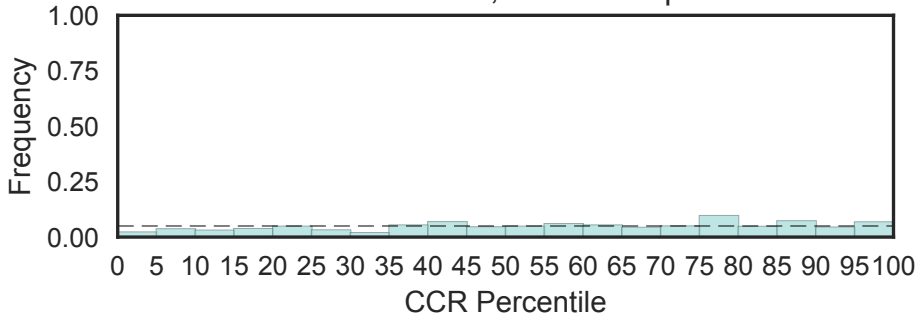



Tetratricopeptide repeat  
(TPR\_12, N=49)

Fisher's OR: 1.72; Bonferroni p-val: 1

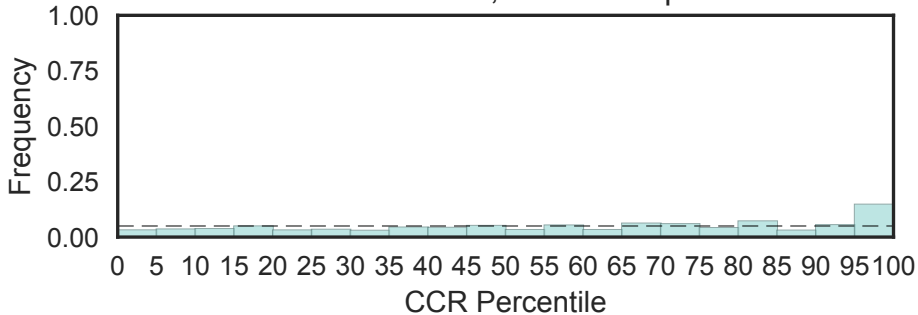

Tetratricopeptide repeat  
(TPR<sub>14</sub>, N=3)

Fisher's OR: 6.76; Bonferroni p-val: 1

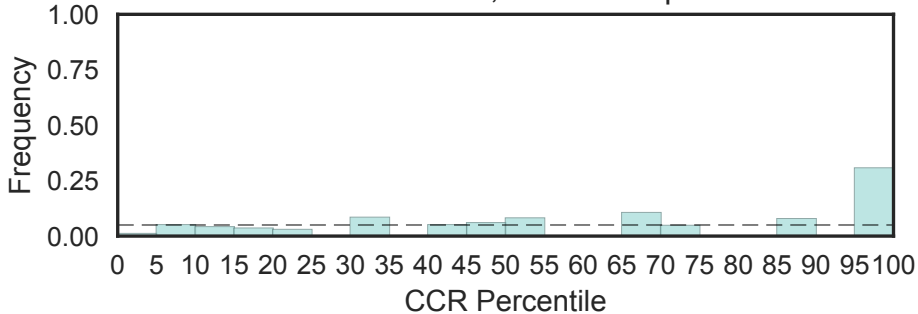

Tetratricopeptide repeat  
(TPR\_15, N=4)

Fisher's OR: 0; Bonferroni p-val: 1

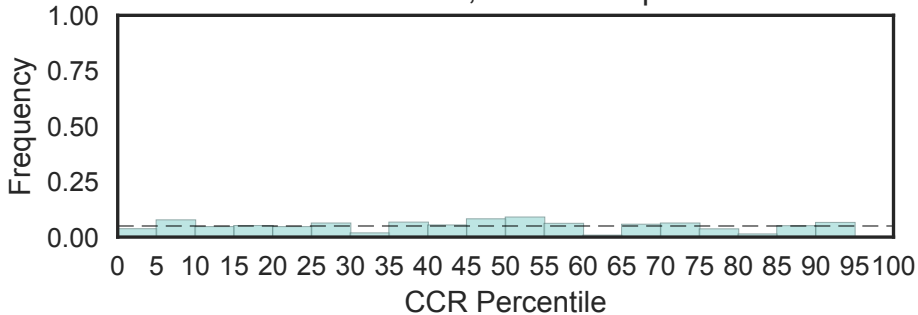

Tetratricopeptide repeat  
(TPR\_16, N=98)

Fisher's OR: 1.25; Bonferroni p-val: 1

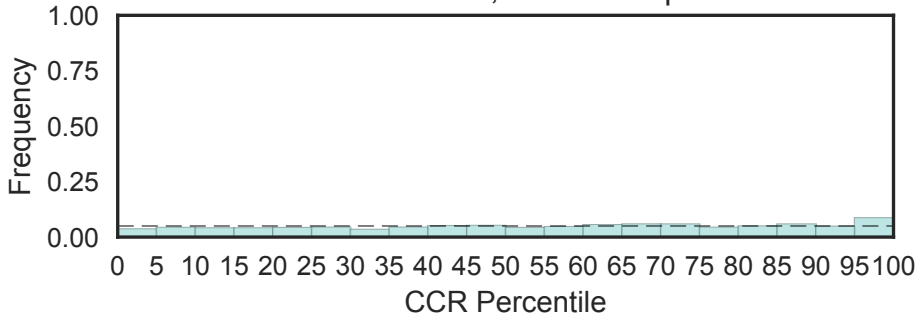

Tetratricopeptide repeat  
(TPR\_17, N=6)

Fisher's OR: 1.57; Bonferroni p-val: 1

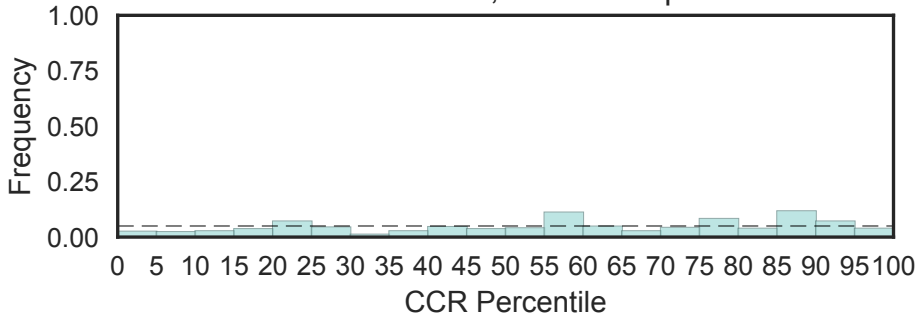

Tetratricopeptide repeat  
(TPR\_19, N=20)

Fisher's OR: 1.59; Bonferroni p-val: 1

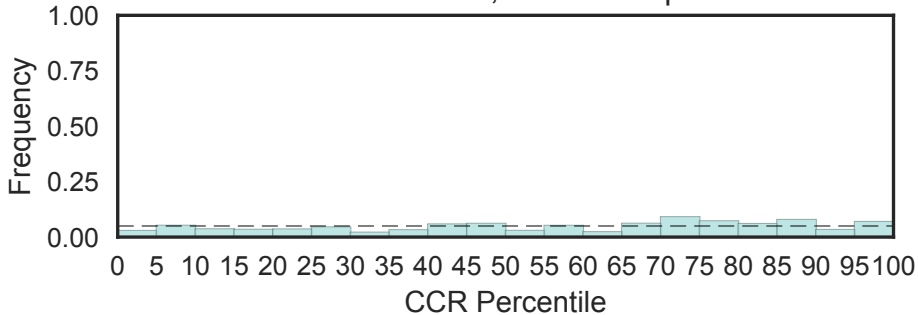

Tetratricopeptide repeat  
(TPR\_2, N=48)

Fisher's OR: 1.43; Bonferroni p-val: 1

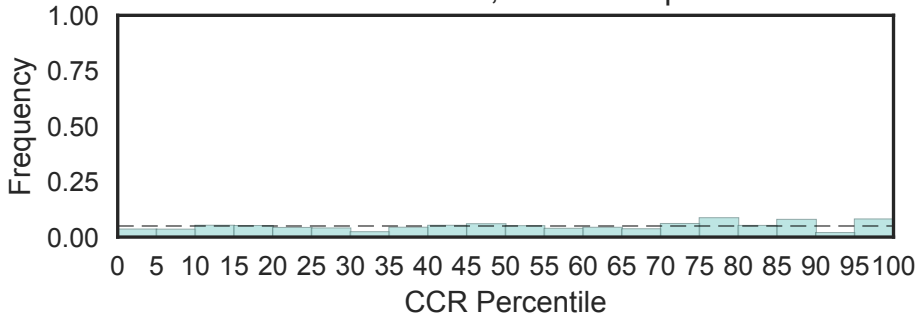

Tetratricopeptide repeat-like domain  
(TPR\_21, N=1)

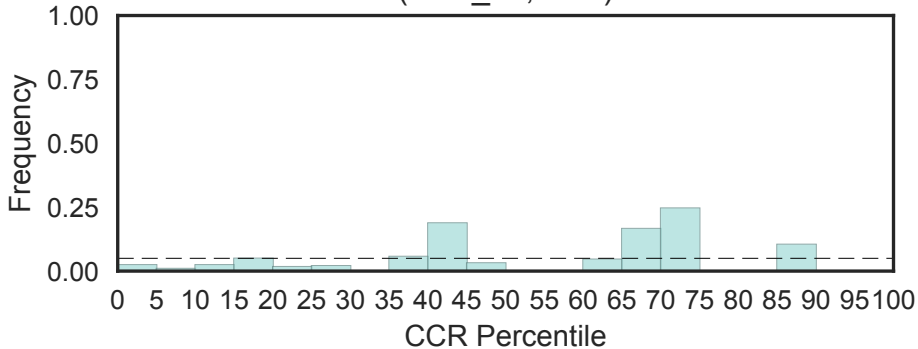



Tetratricopeptide repeat  
(TPR\_3, N=6)

Fisher's OR: 2.25; Bonferroni p-val: 1

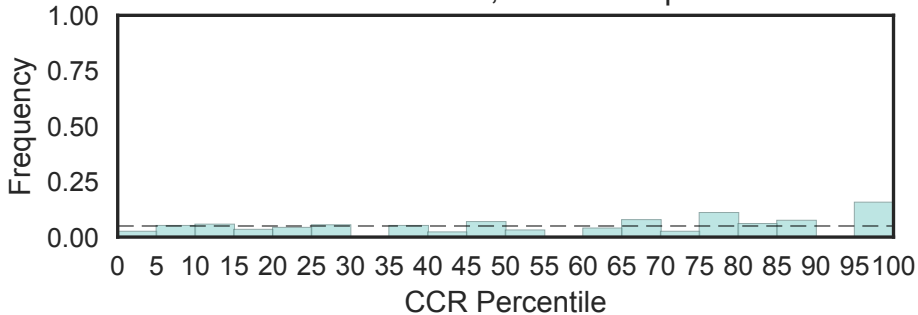

Tetratricopeptide repeat  
(TPR\_4, N=17)

Fisher's OR: 0; Bonferroni p-val: 1

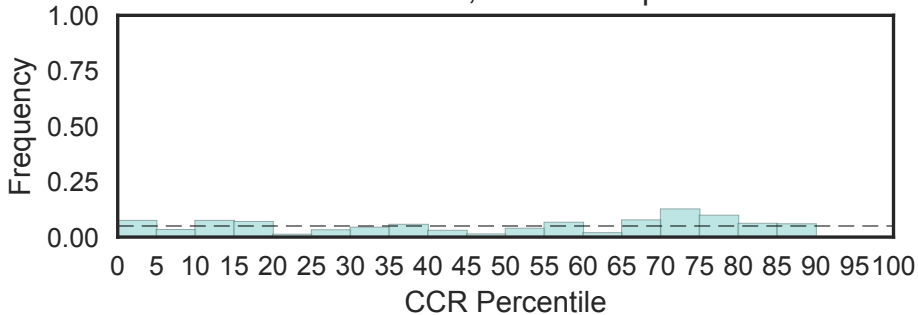

Tetratricopeptide repeat  
(TPR\_6, N=37)

Fisher's OR: 1.86; Bonferroni p-val: 1

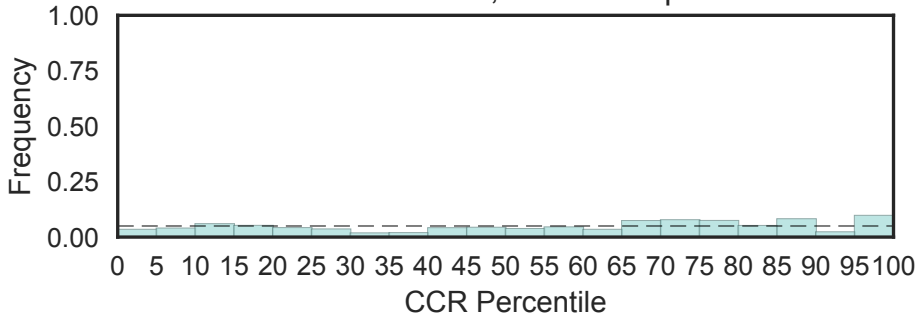

Tetratricopeptide repeat  
(TPR\_7, N=85)

Fisher's OR: 2.39; Bonferroni p-val: 1

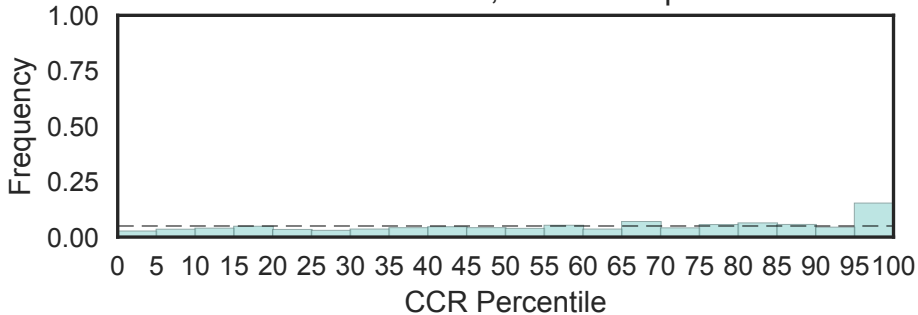

Tetratricopeptide repeat  
(TPR\_8, N=241)

Fisher's OR: 1.39; Bonferroni p-val: 1

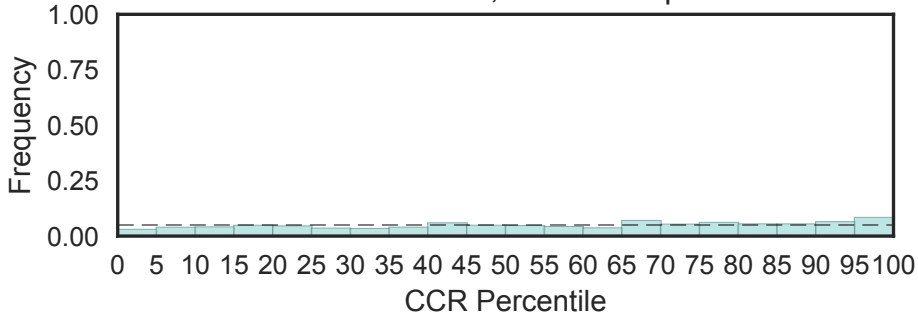

TPR/MLP1/MLP2-like protein  
(TPR\_MLP1\_2, N=1)

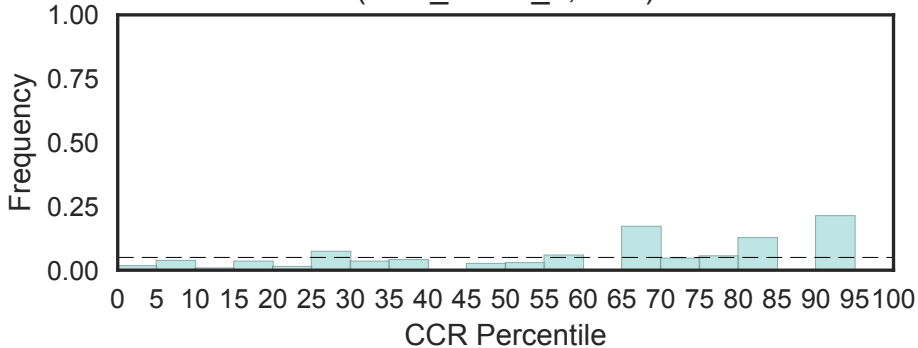

Triose-phosphate Transporter family  
(TPT, N=10)

Fisher's OR: 0.467; Bonferroni p-val: 1

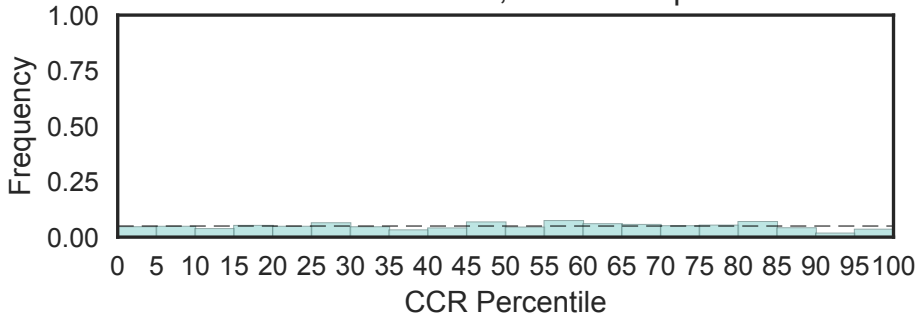

Targeting protein for Xklp2 (TPX2)  
(TPX2, N=1)

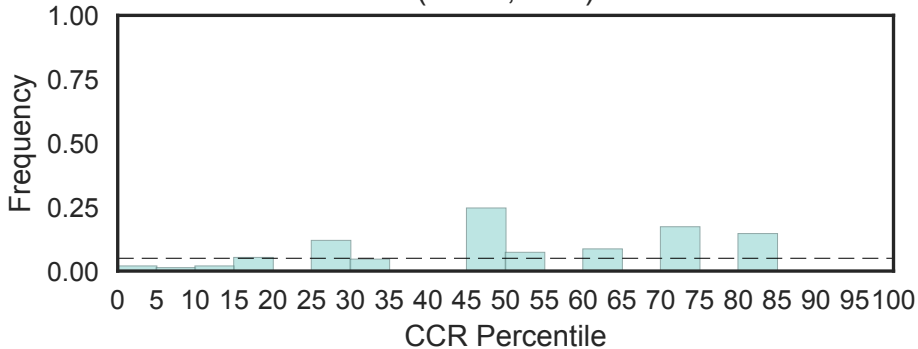



Cell cycle regulated microtubule associated protein  
(TPX2\_importin, N=1)

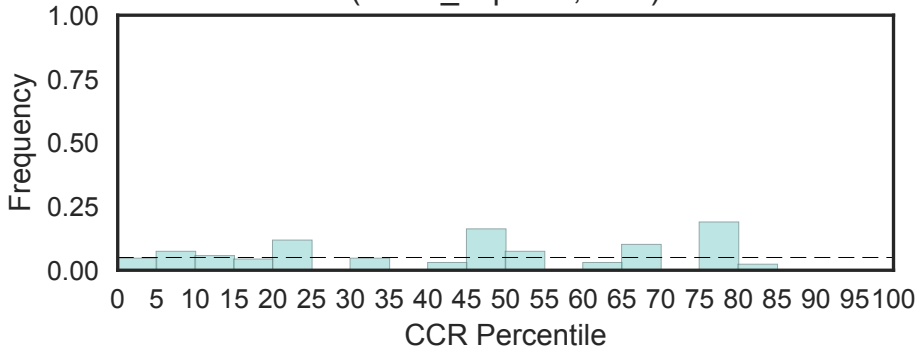

# Tetrapyrrole (Corrin/Porphyrin) Methylases (TP\_methylase, N=2)

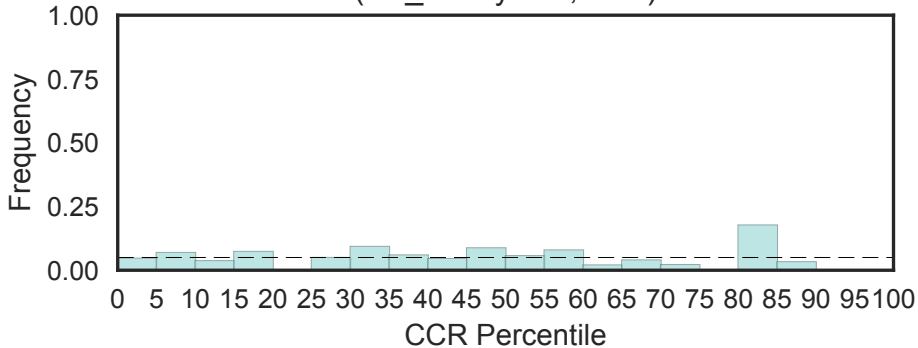

TRADD, N-terminal domain  
(TRADD\_N, N=1)

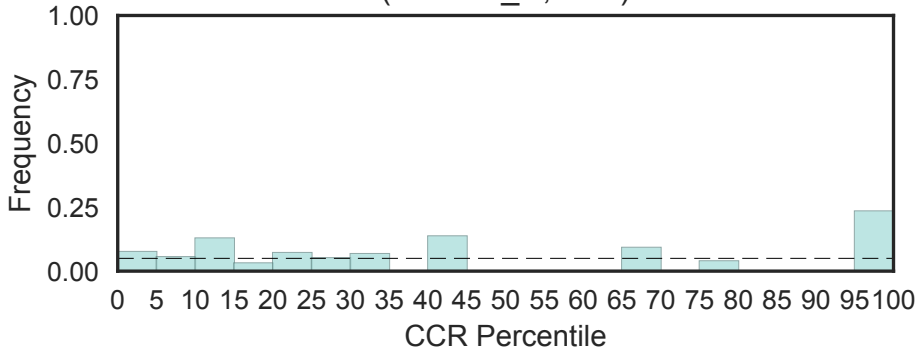

TNF receptor-associated factor BIRC3 binding domain  
(TRAF\_BIRC3\_bd, N=2)

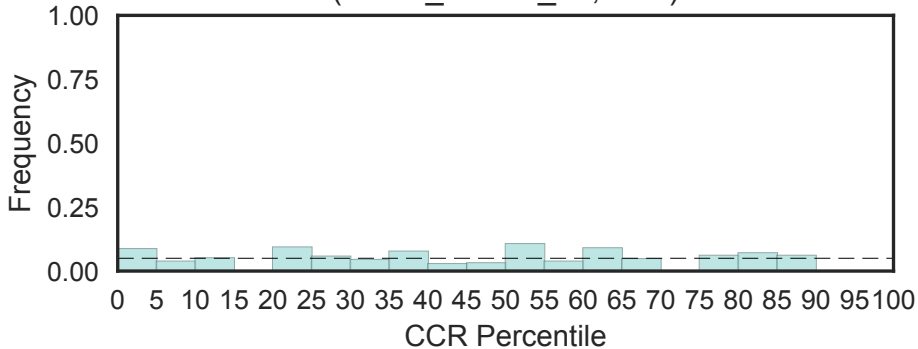

TRAM domain  
(TRAM, N=2)

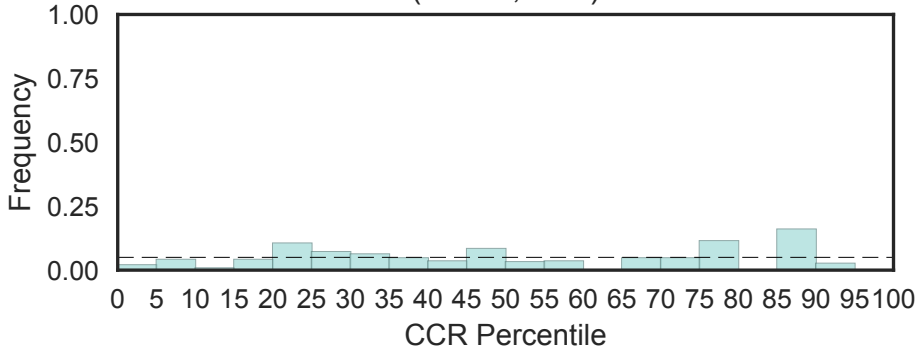

TRAM1-like protein  
(TRAM1, N=4)

Fisher's OR: 0; Bonferroni p-val: 1

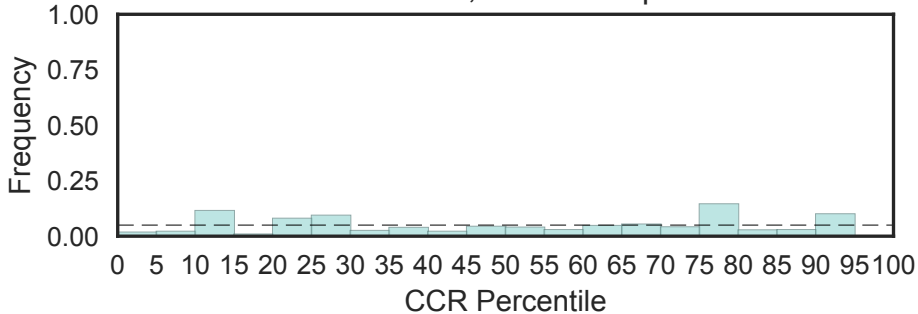

TLC domain  
(TRAM\_LAG1\_CLN8, N=18)  
Fisher's OR: 0.692; Bonferroni p-val: 1

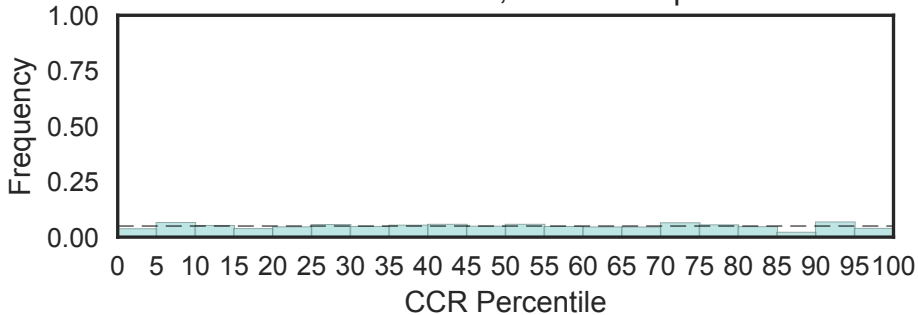

Translocon-associated protein, gamma subunit (TRAP-gamma)  
(TRAP-gamma, N=1)

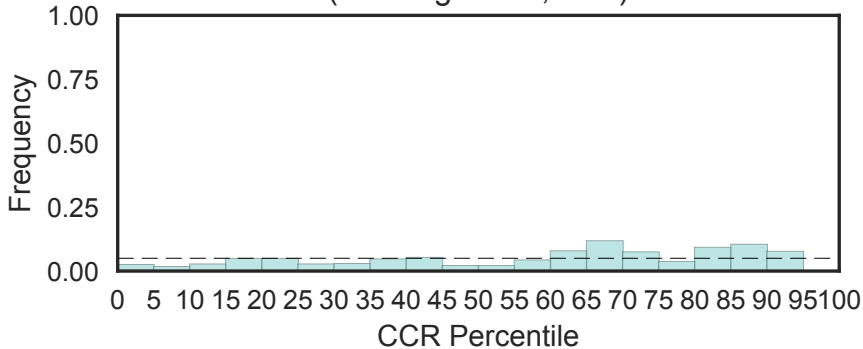



Transport protein particle (TRAPP) component  
(TRAPP, N=7)

Fisher's OR: 0.511; Bonferroni p-val: 1

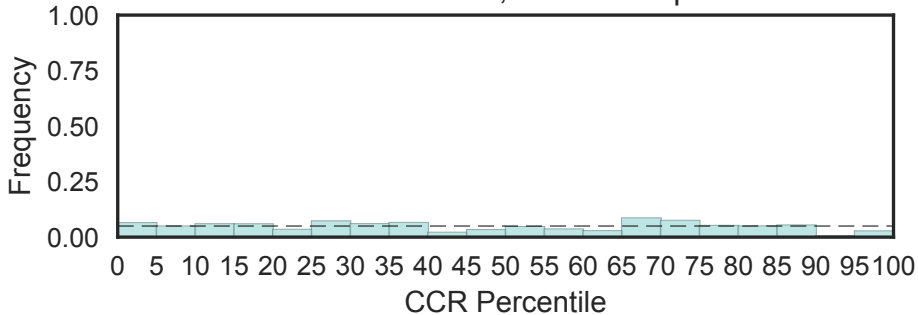

ER-Golgi trafficking TRAPP I complex 85 kDa subunit  
(TRAPPC-Trs85, N=1)

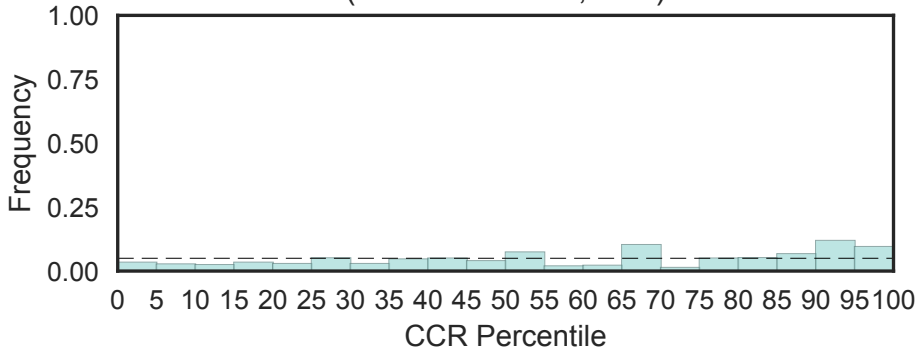

# Trafficking protein particle complex subunit 10, TRAPPC10 (TRAPPC10, N=1)

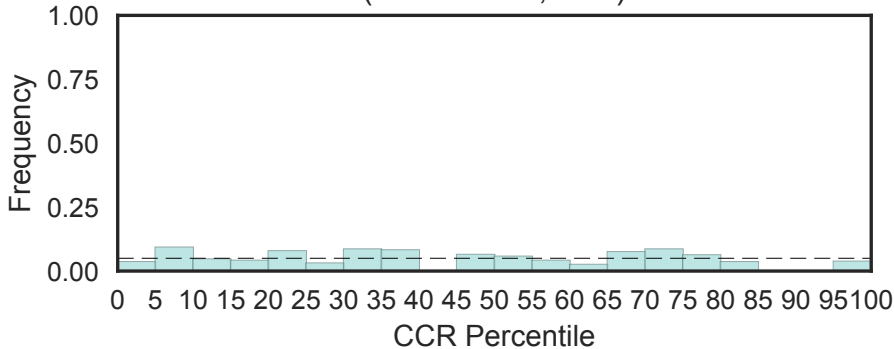

Transport protein Trs120 or TRAPPC9, TRAPP II complex subunit  
(TRAPPC9-Trs120, N=4)

Fisher's OR: 0.718; Bonferroni p-val: 1

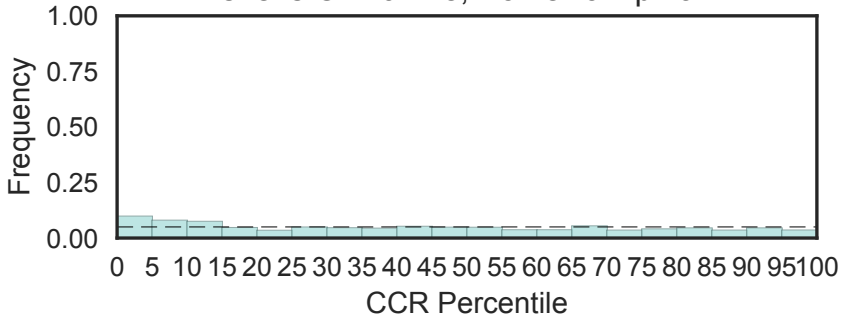

Translocon-associated protein (TRAP), alpha subunit  
(TRAP\_alpha, N=1)

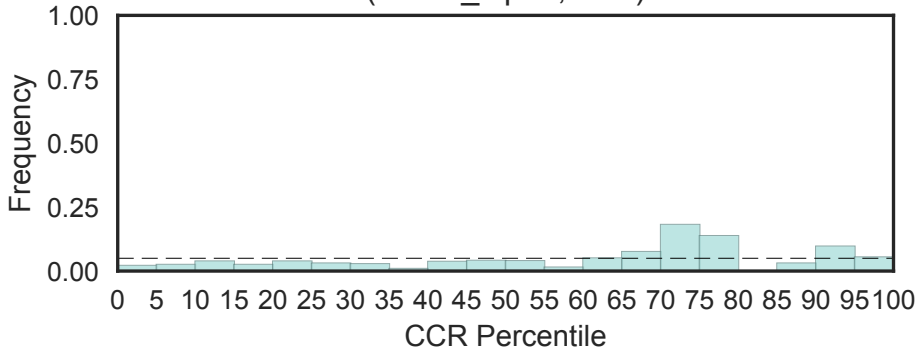

Translocon-associated protein beta (TRAPB)  
(TRAP\_beta, N=1)

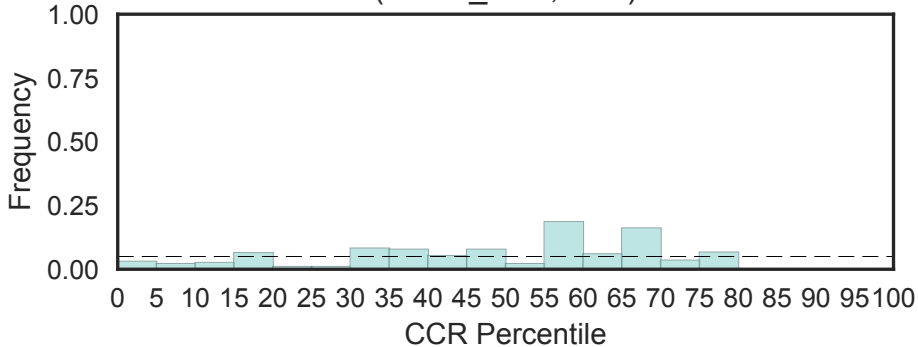

Apoptosis-antagonizing transcription factor, C-terminal  
(TRAUB, N=1)

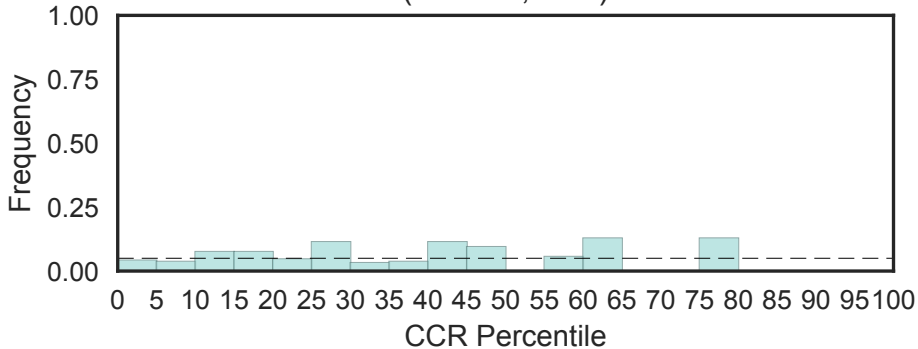

TRC8 N-terminal domain  
(TRC8\_N, N=2)

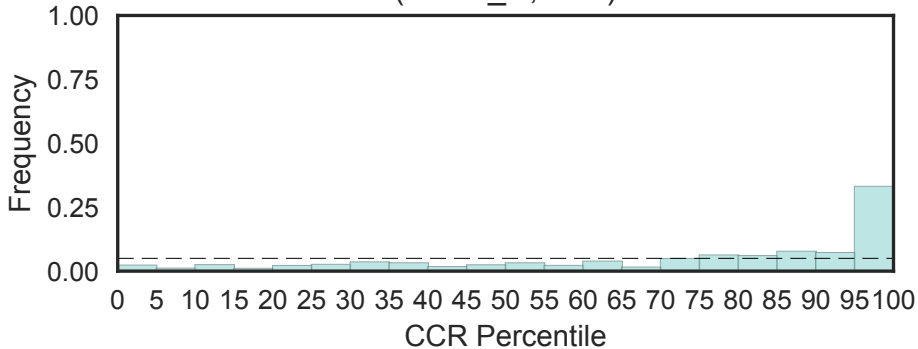



Telomere repeat binding factor (TRF)  
(TRF, N=2)

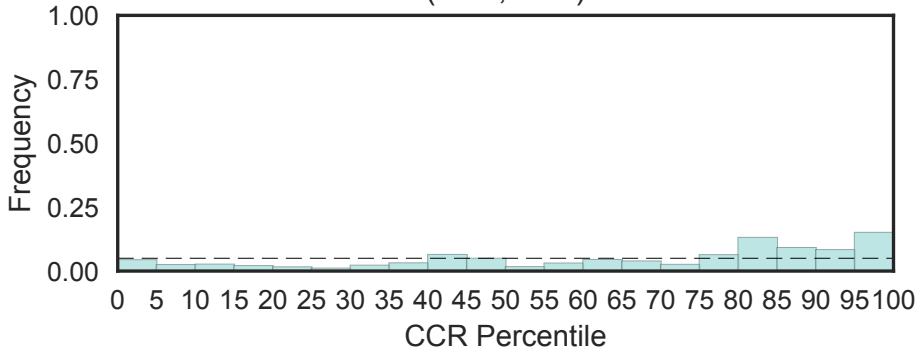

Thyrotropin-releasing hormone (TRH)  
(TRH, N=1)

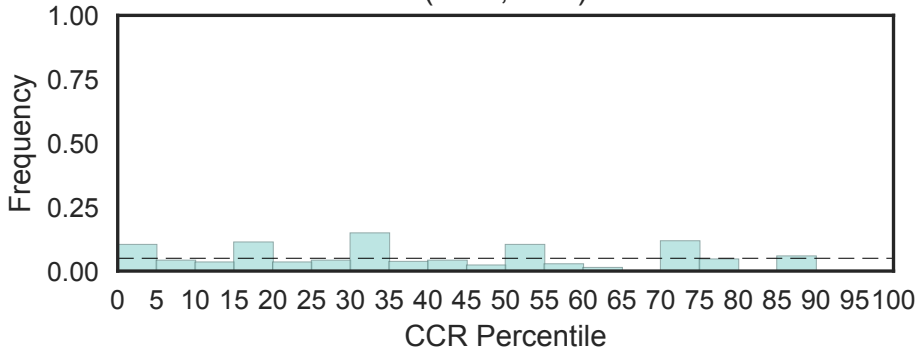

TRIC channel  
(TRIC, N=2)

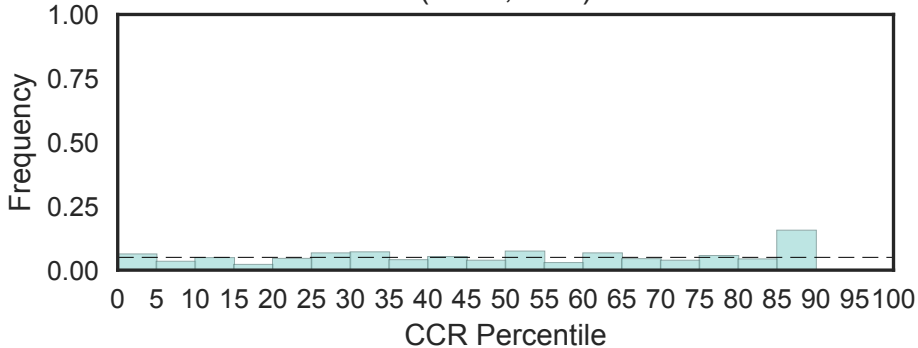

Triple QxxK/R motif-containing protein family  
(TRIQK, N=1)

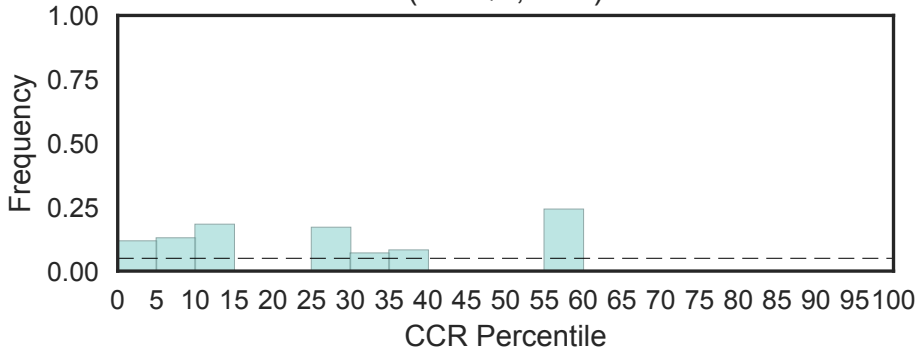

N2,N2-dimethylguanosine tRNA methyltransferase  
(TRM, N=3)

Fisher's OR: 0.691; Bonferroni p-val: 1

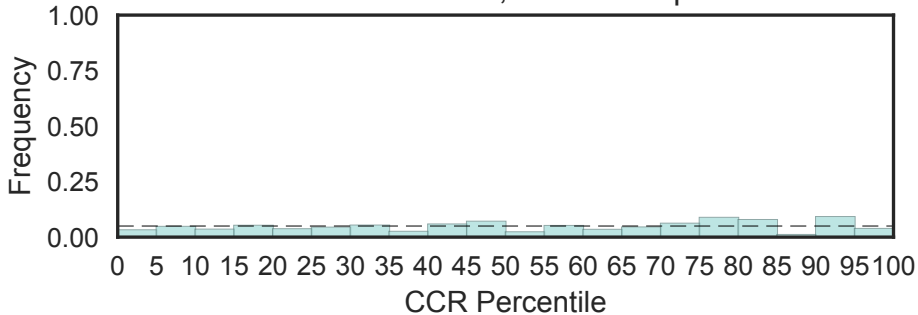

# Methyltransferase TRM13 (TRM13, N=1)

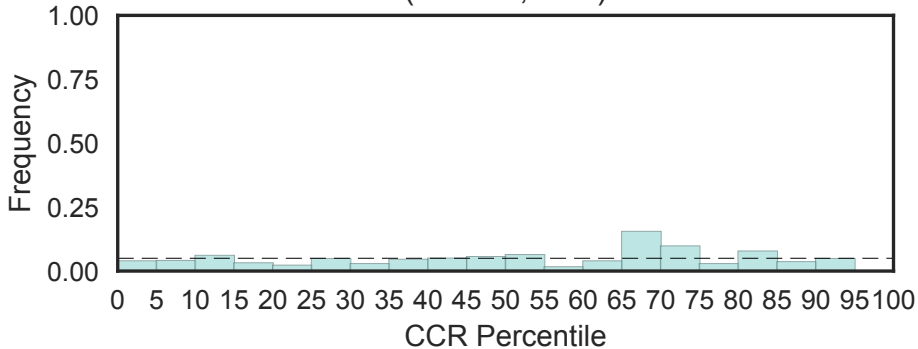

TROVE domain  
(TROVE, N=2)

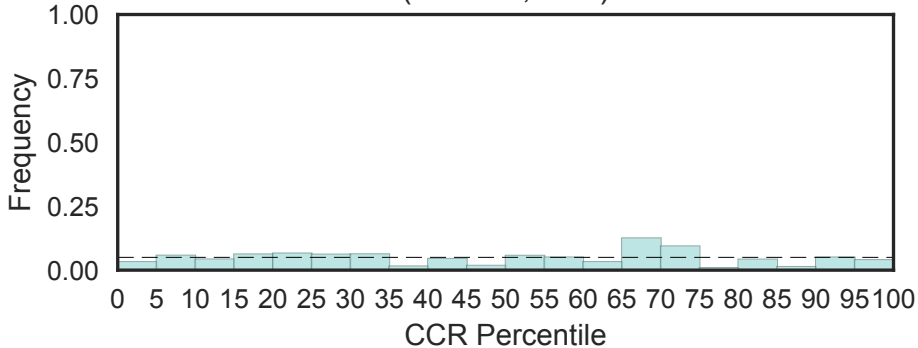

Tetramerisation domain of TRPM  
(TRPM\_tetra, N=4)  
Fisher's OR: 0; Bonferroni p-val: 1

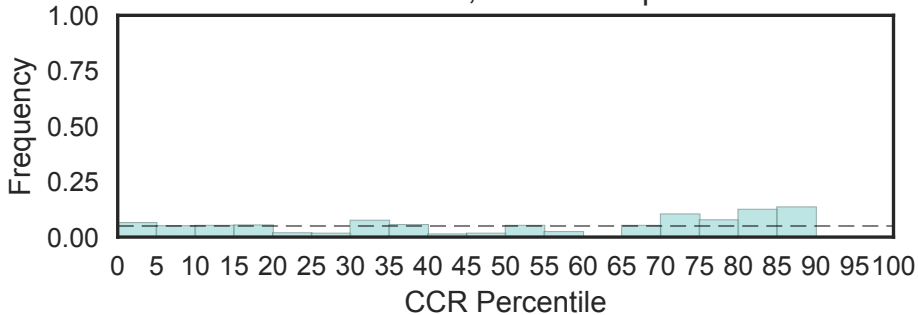



Transient receptor ion channel II  
(TRP\_2, N=5)  
Fisher's OR: 1.24; Bonferroni p-val: 1

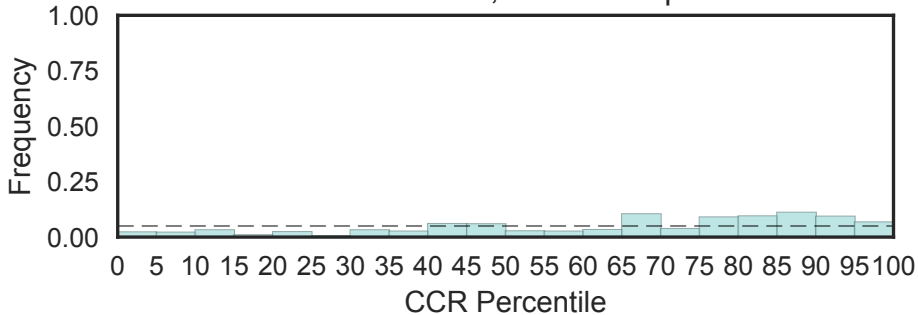

TSC21 family  
(TSC21, N=1)

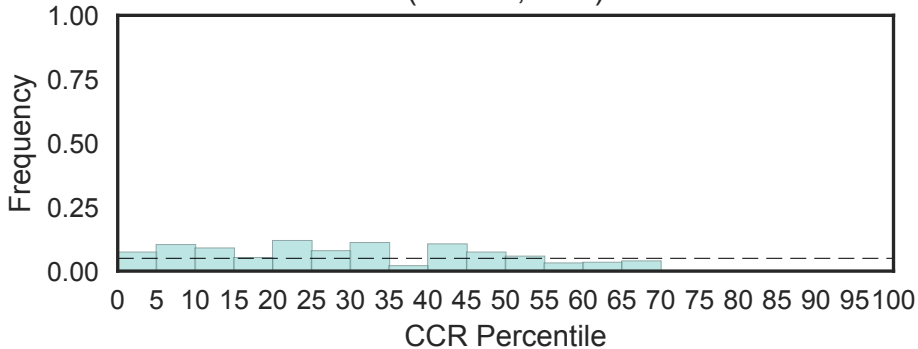

TSC-22/dip/bun family  
(TSC22, N=3)

Fisher's OR: 2.25; Bonferroni p-val: 1

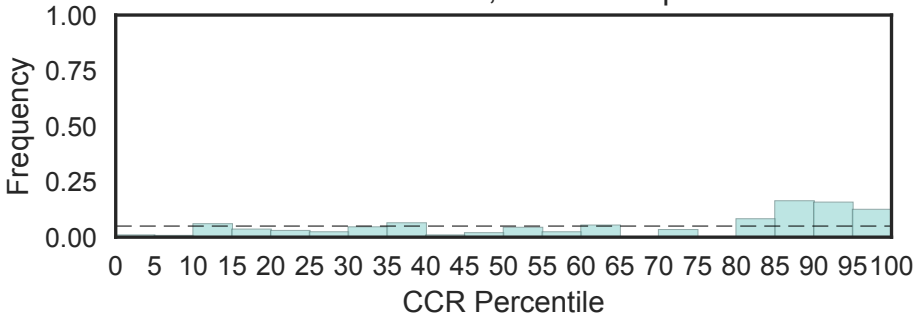

Testis-specific gene 13 protein  
(TSGA13, N=1)

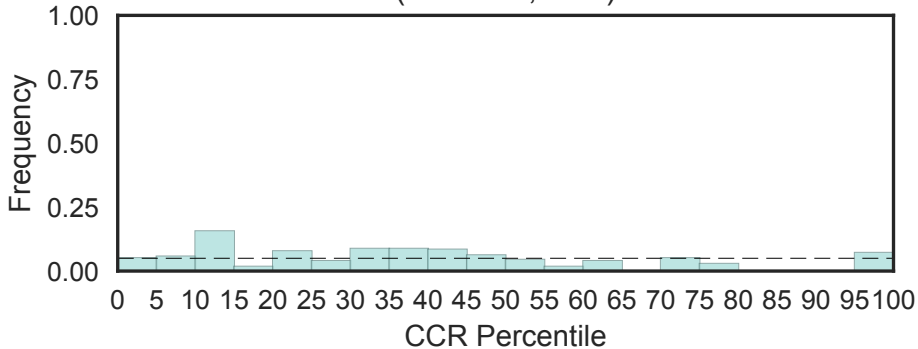

# Testis-specific serine kinase substrate (TSKS, N=1)

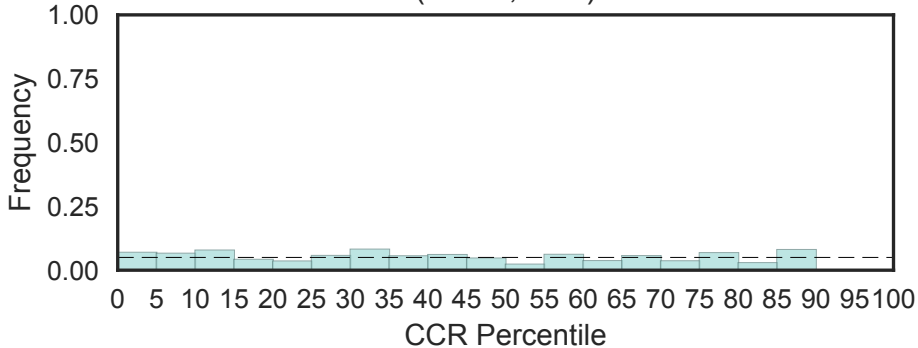

Translin-associated factor X-interacting N-terminus  
(TSNAXIP1\_N, N=3)

Fisher's OR: 0; Bonferroni p-val: 1

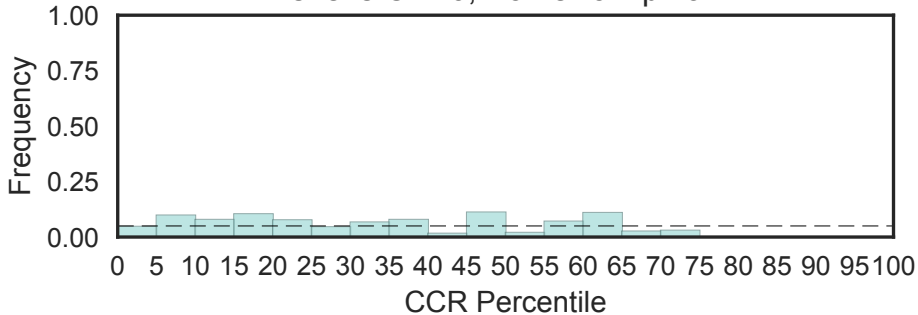

Thrombospondin type 1 domain  
(TSP\_1, N=220)

Fisher's OR: 0.299; Bonferroni p-val: 0.0096

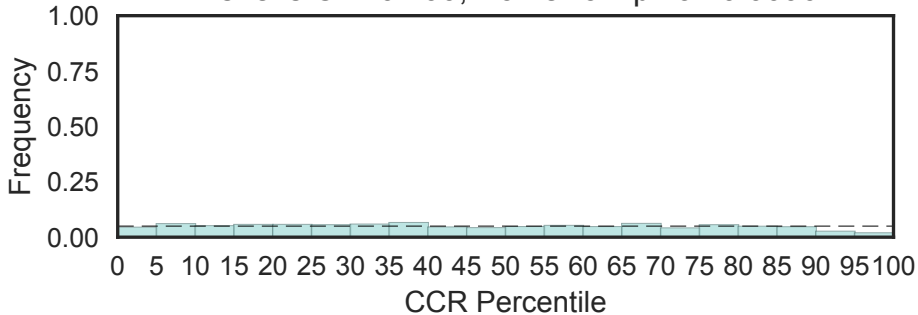

Thrombospondin type 3 repeat  
(TSP\_3, N=20)

Fisher's OR: 0.26; Bonferroni p-val: 1

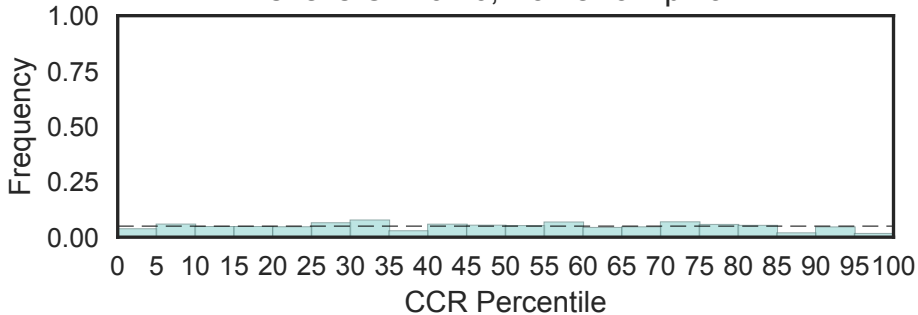



Thrombospondin C-terminal region  
(TSP\_C, N=5)

Fisher's OR: 0.594; Bonferroni p-val: 1

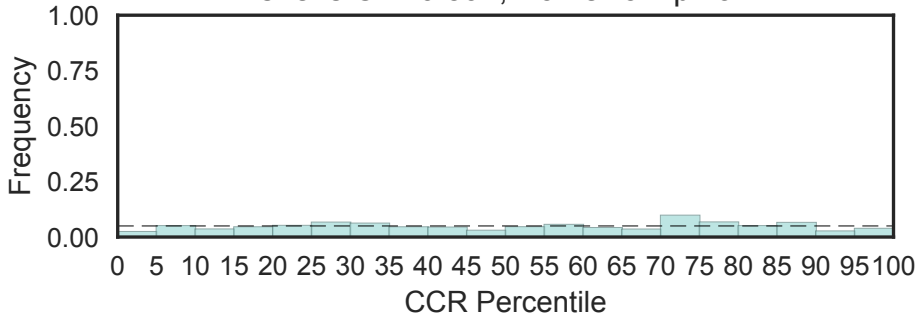

# Tumour suppressing sub-chromosomal transferable candidate 4 (TSSC4, N=1)

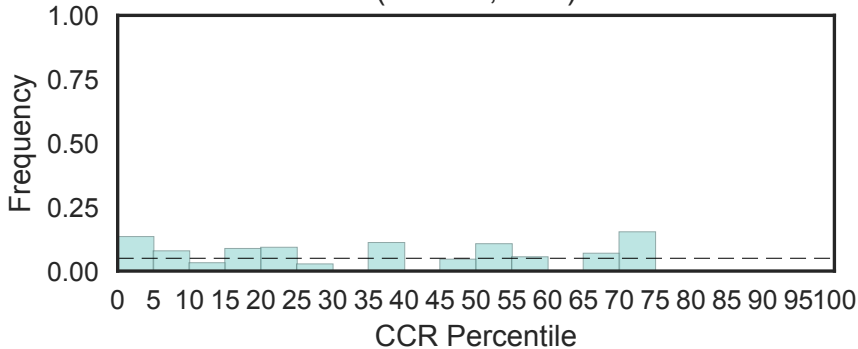

Tetratricopeptide repeat protein 5 OB fold domain  
(TTC5\_OB, N=1)

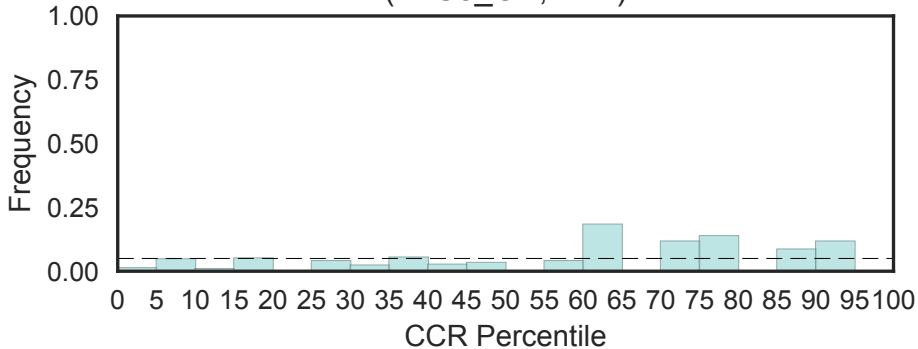

# Tandem tudor domain within UHRF1 (TTD, N=2)

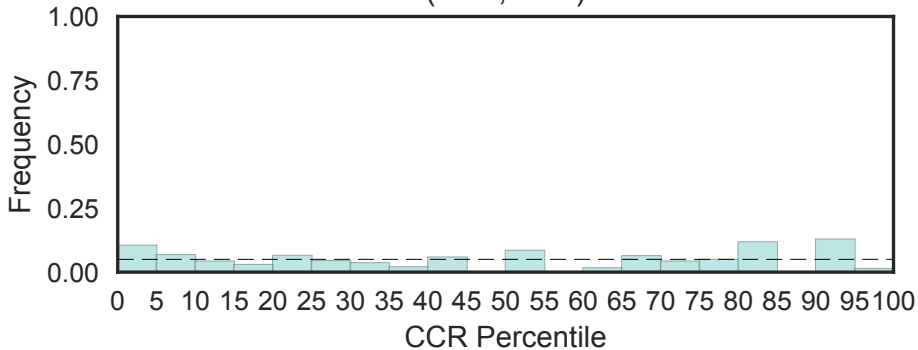

Predicted coiled-coil domain-containing protein  
(TTKRSYEDQ, N=2)

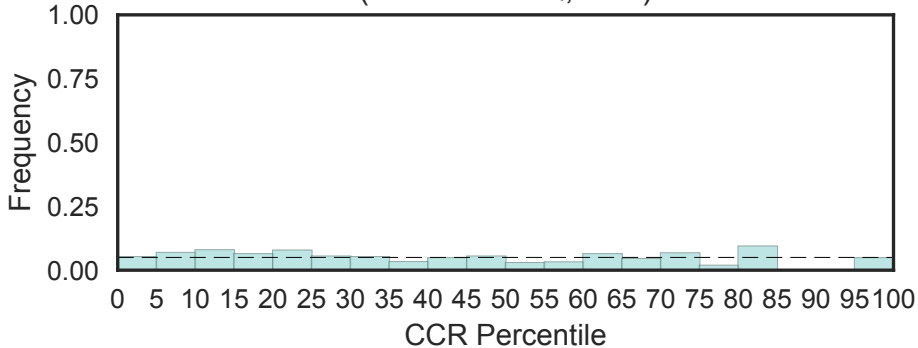

Tubulin-tyrosine ligase family  
(TTL, N=14)

Fisher's OR: 0.0684; Bonferroni p-val: 0.0913

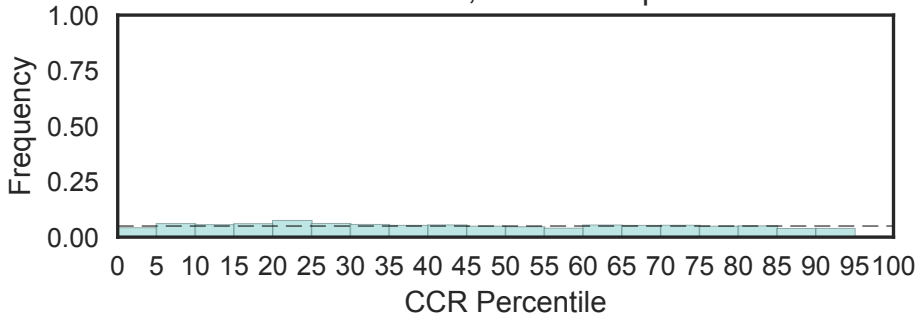

Tudor domain  
(TUDOR, N=29)

Fisher's OR: 0.627; Bonferroni p-val: 1

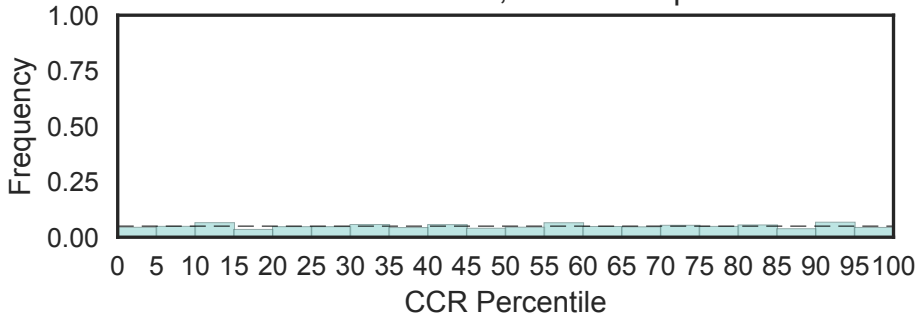

TUG ubiquitin-like domain  
(TUG-UBL1, N=1)

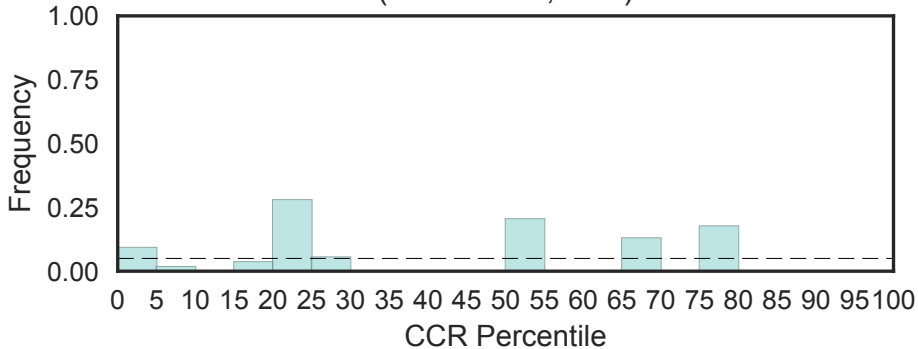



# Tumour suppressor candidate 2 (TUSC2, N=1)

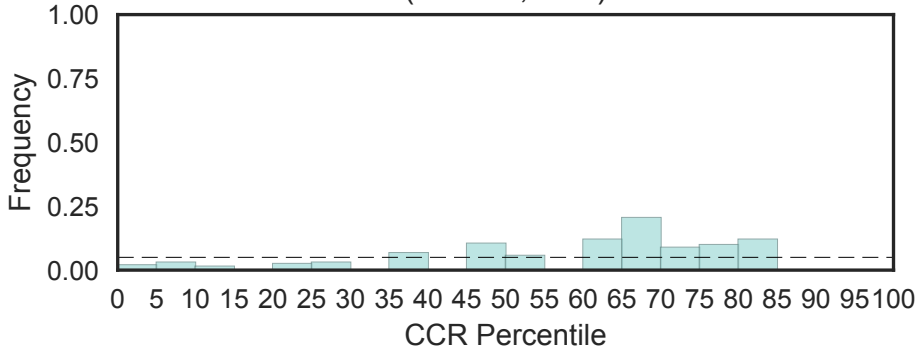

Unstructured region 4 on terminal uridylyltransferase 7  
(TUTF7\_u4, N=1)

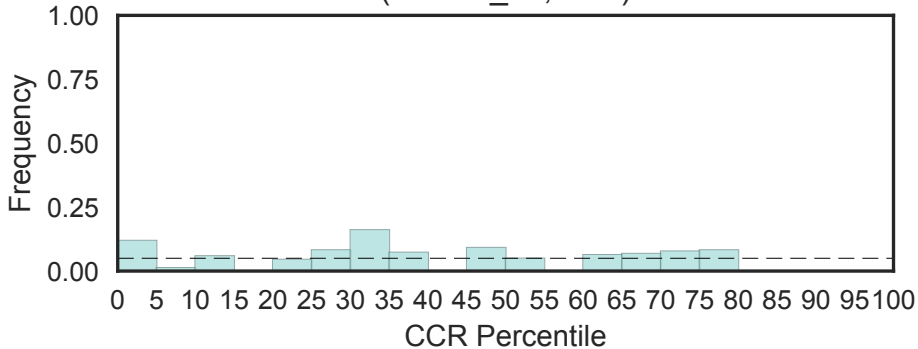

# Methyltransferase TYW3 (TYW3, N=1)

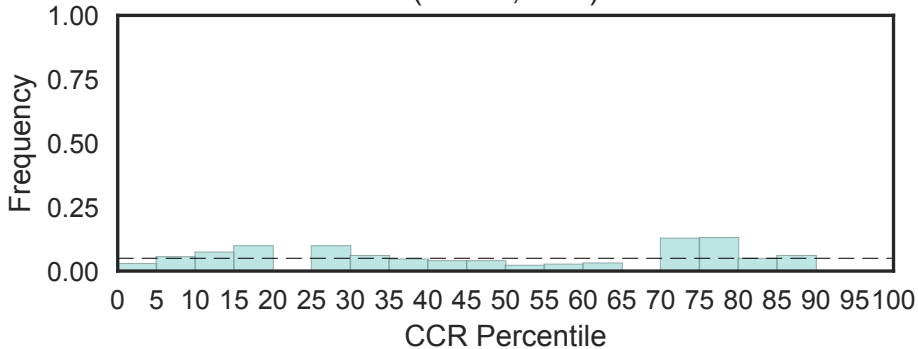

T-cell leukemia translocation-altered  
(T\_cell\_tran\_alt, N=1)

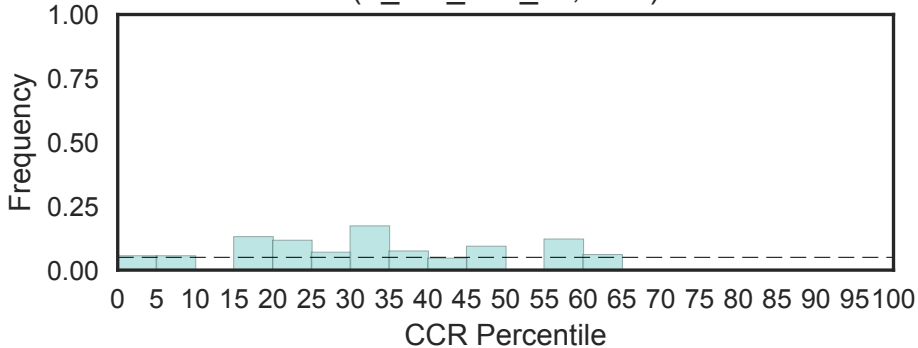

# Takusan

(Takusan, N=1)

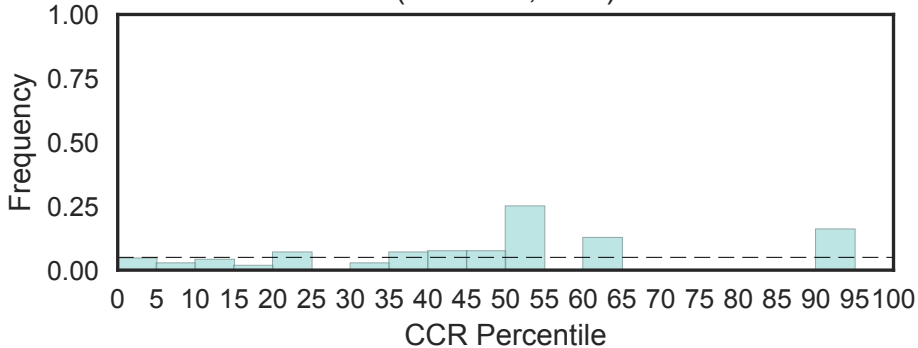

Talin, middle domain  
(Talin\_middle, N=2)

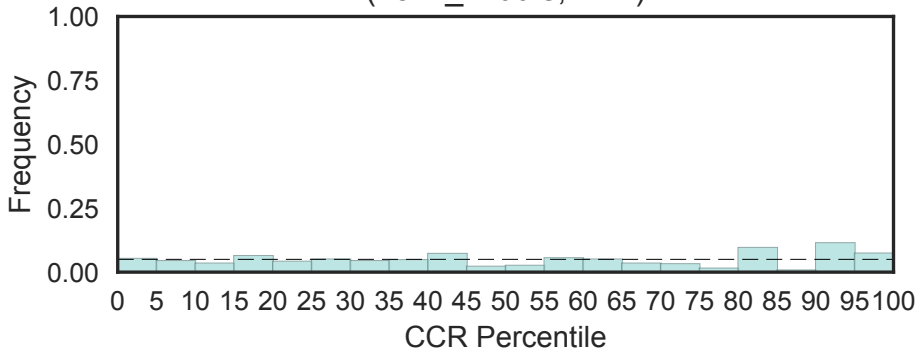

Tankyrase binding protein C terminal domain  
(Tankyrase\_bdg\_C, N=2)

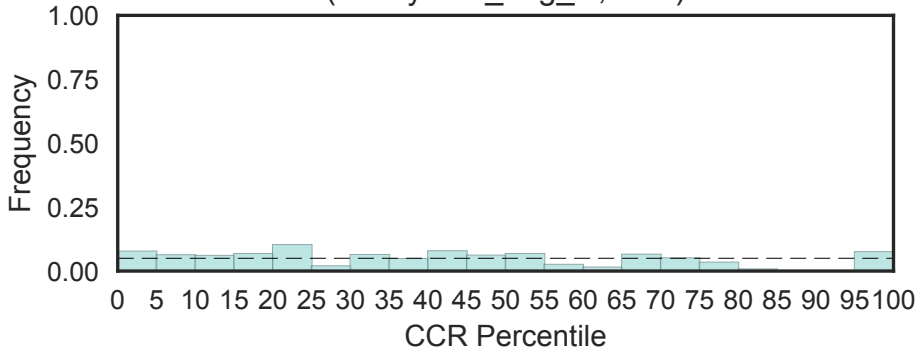

Drosophila Tantalus-like  
(Tantalus, N=2)

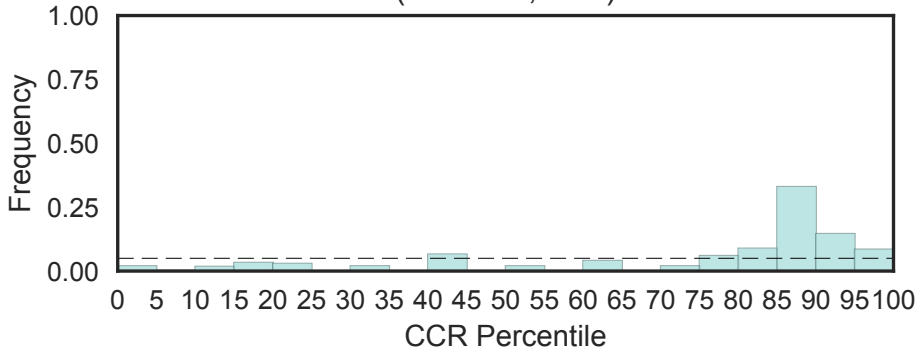



Tap, RNA-binding  
(Tap-RNA\_bind, N=1)

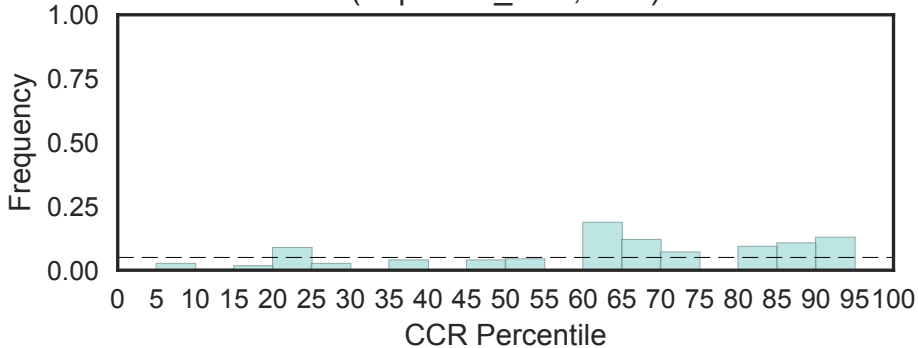

TatD related DNase  
(TatD\_DNase, N=4)  
Fisher's OR: 0; Bonferroni p-val: 1

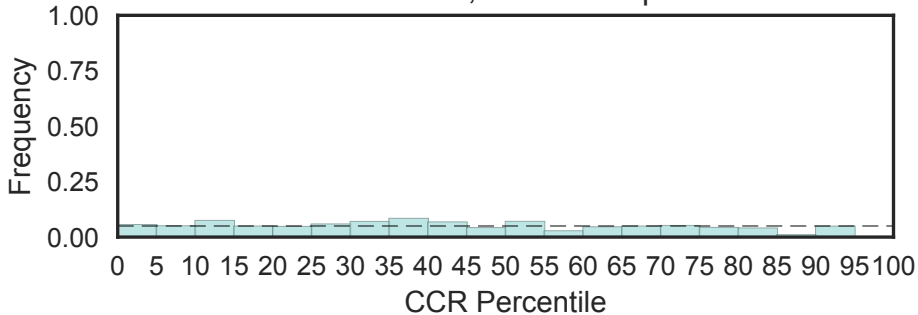

RNA polymerase III transcription factor (TF)IIC subunit  
(Tau95, N=1)

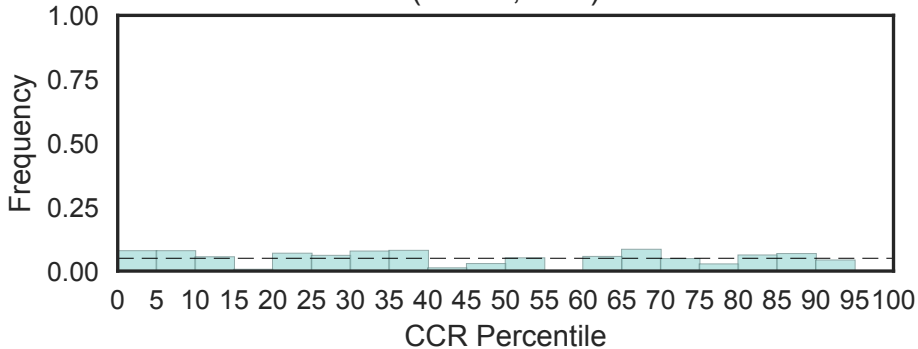

Taurine catabolism dioxygenase TauD, TfdA family  
(TauD, N=1)

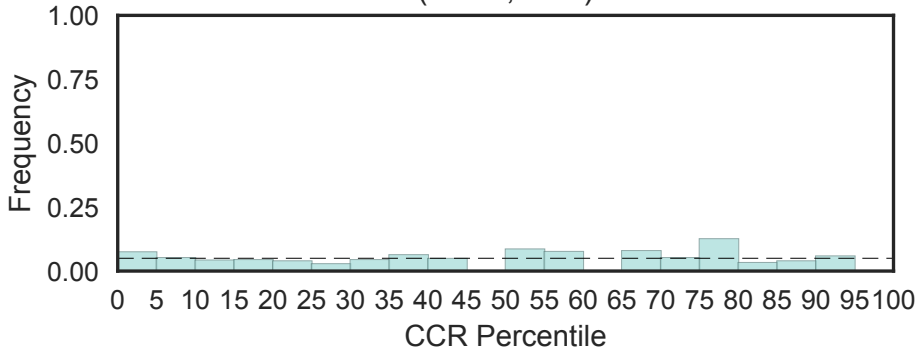

Myosin-like coiled-coil protein  
(Taxilin, N=2)

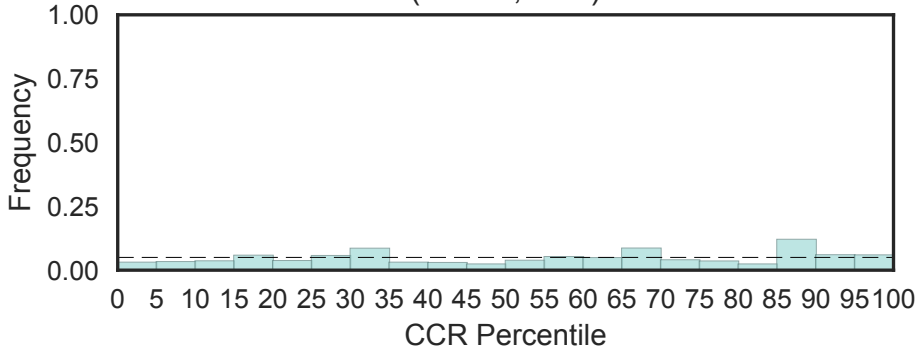

T cell CD4 receptor C terminal region  
(Tcell\_CD4\_C, N=1)

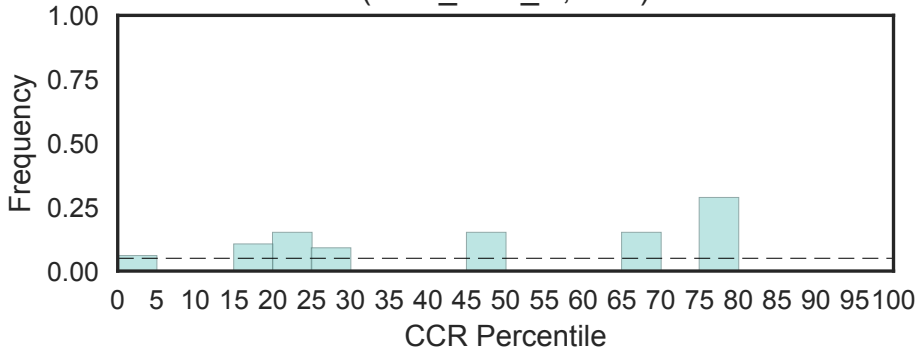

Transcriptional repressor TCF25  
(Tcf25, N=1)

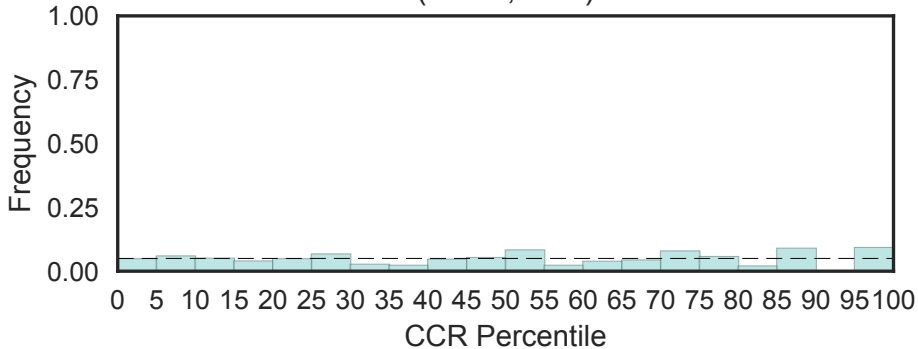

T-complex protein 10 C-terminus  
(Tcp10\_C, N=1)

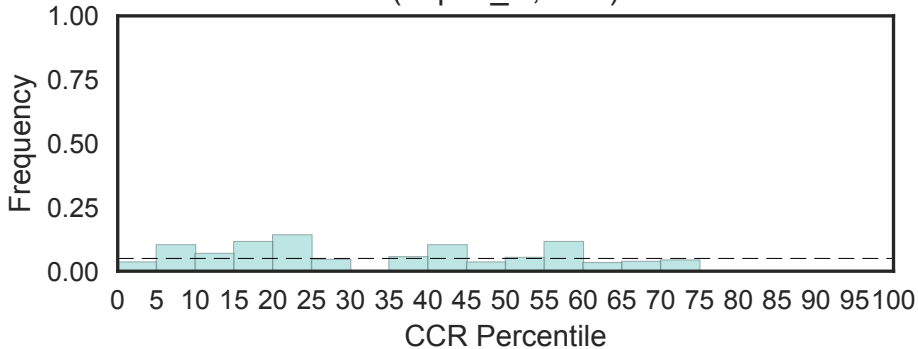



# T-complex protein 11

(Tcp11, N=3)

Fisher's OR: 0.421; Bonferroni p-val: 1

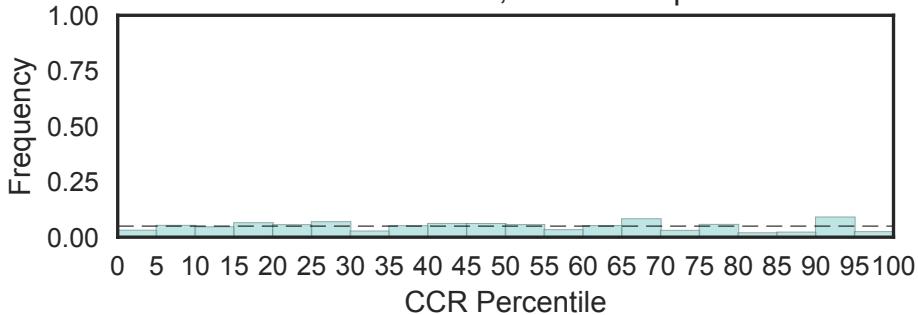

Tctex-1 family  
(Tctex-1, N=5)

Fisher's OR: 0.53; Bonferroni p-val: 1

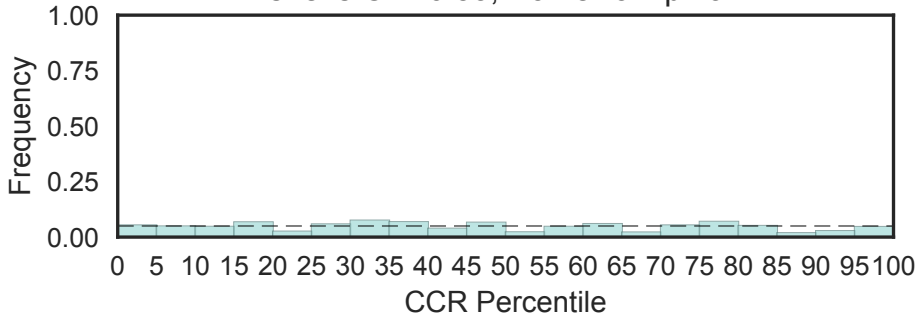

Tektin family  
(Tektin, N=6)

Fisher's OR: 0; Bonferroni p-val: 1

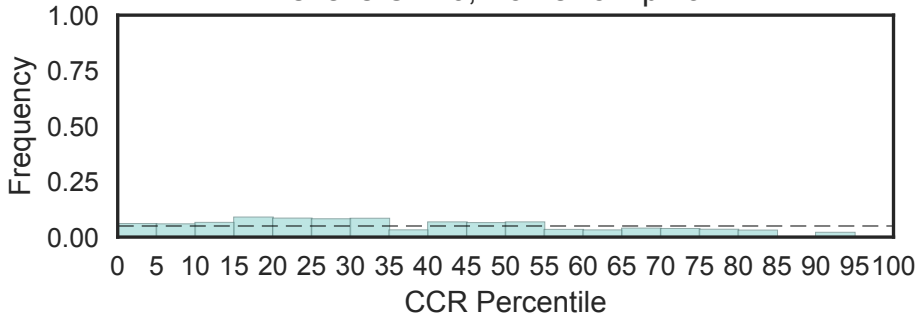

# Telethonin protein (Telethonin, N=1)

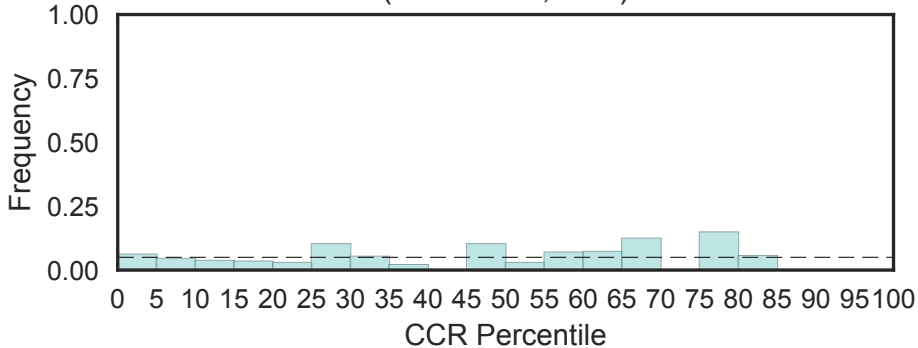

# Telomerase ribonucleoprotein complex - RNA binding domain (Telomerase\_RBD, N=1)

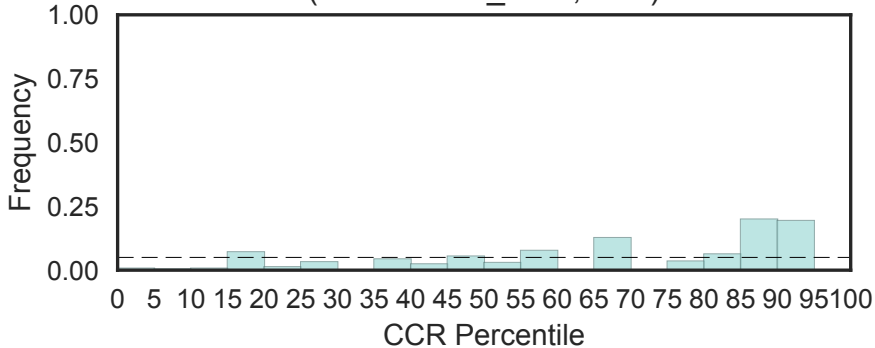

# Telomere stability and silencing (Telomere\_Sde2, N=1)

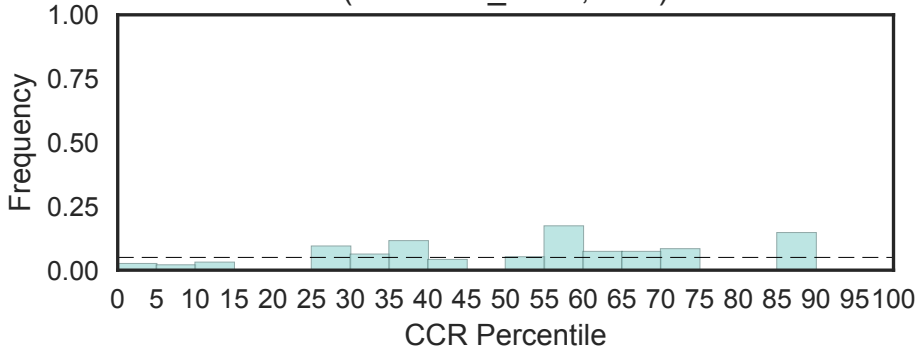

Telomere stability C-terminal  
(Telomere\_Sde2\_2, N=2)

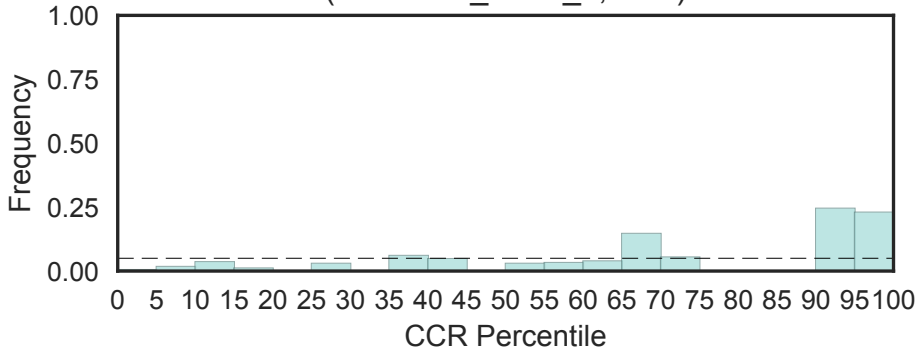

Telomere length regulation protein  
(Telomere\_reg-2, N=1)

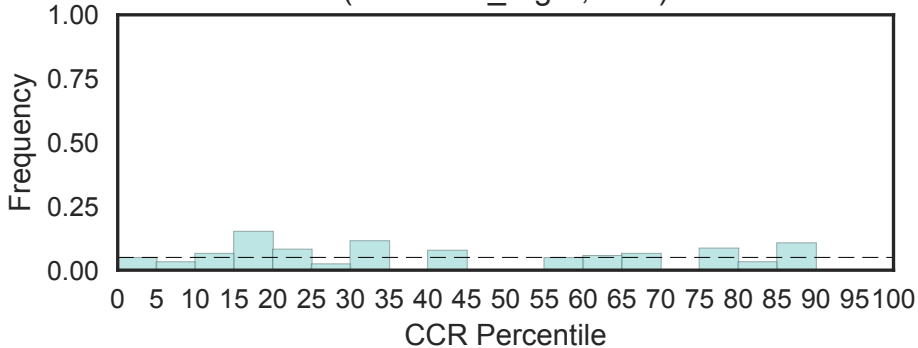



# Teneurin Intracellular Region

(Ten\_N, N=3)

Fisher's OR: 0.642; Bonferroni p-val: 1

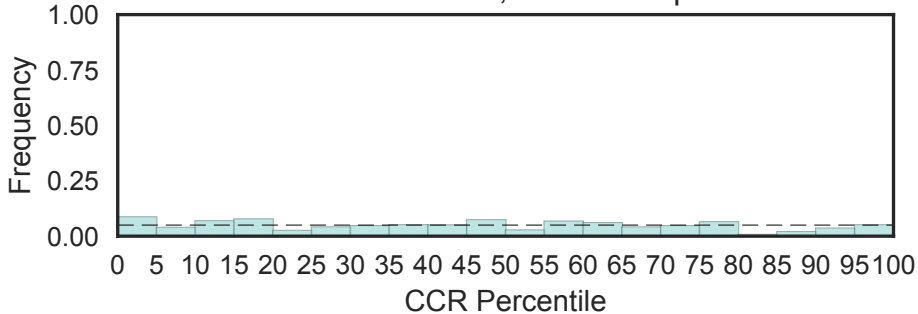

Oxygenase domain of the 2OGFeDO superfamily  
(Tet\_JBP, N=3)

Fisher's OR: 1.55; Bonferroni p-val: 1

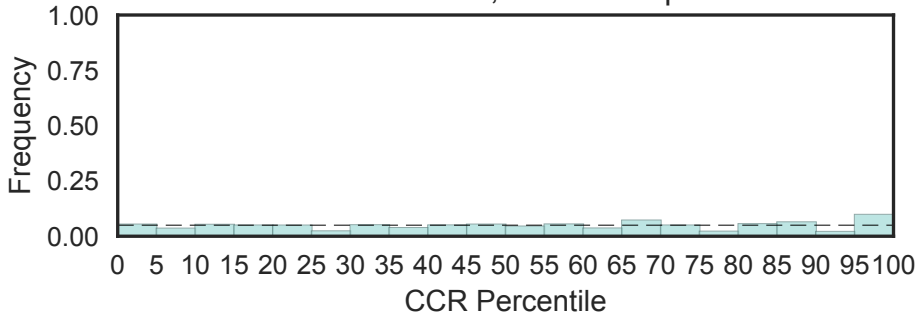

Tetraspanin family  
(Tetraspannin, N=32)

Fisher's OR: 0.263; Bonferroni p-val: 0.0827

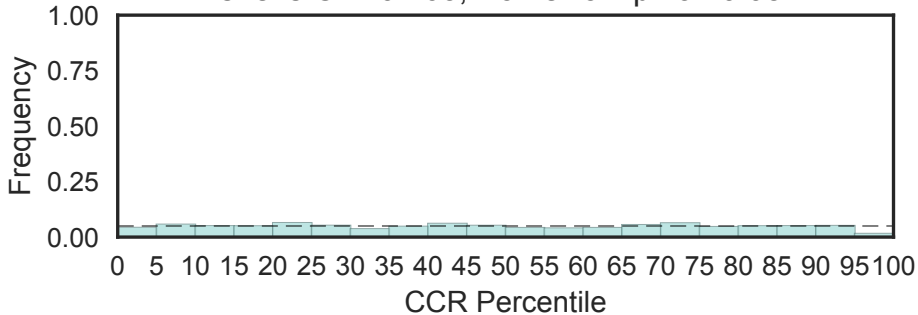

Tex-like protein N-terminal domain  
(Tex\_N, N=1)

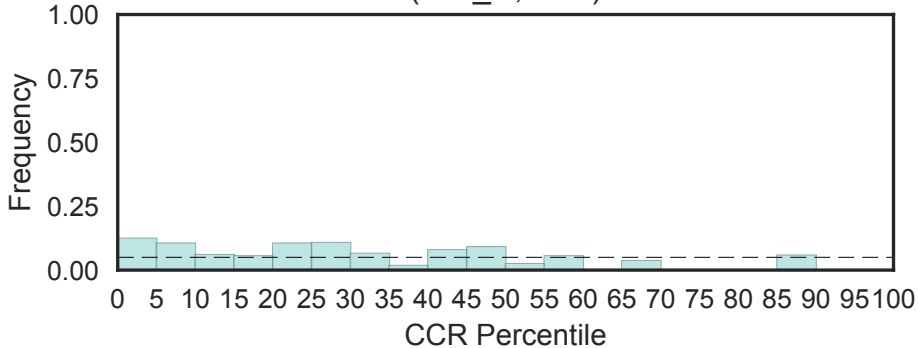

Tex protein YqgF-like domain  
(Tex\_YqgF, N=1)

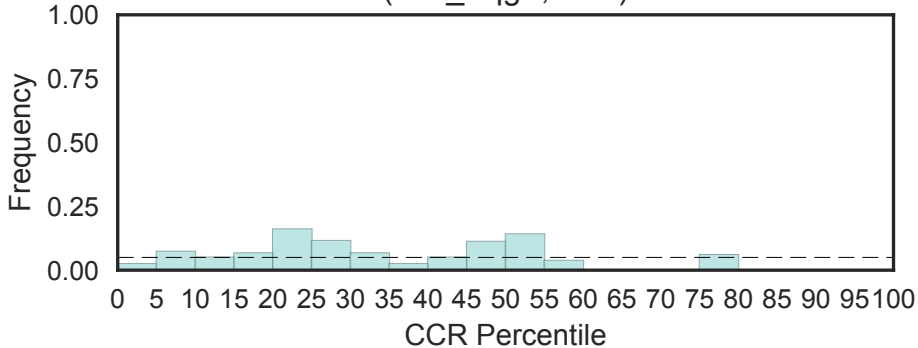

Transcription factor Tfb4  
(Tfb4, N=1)

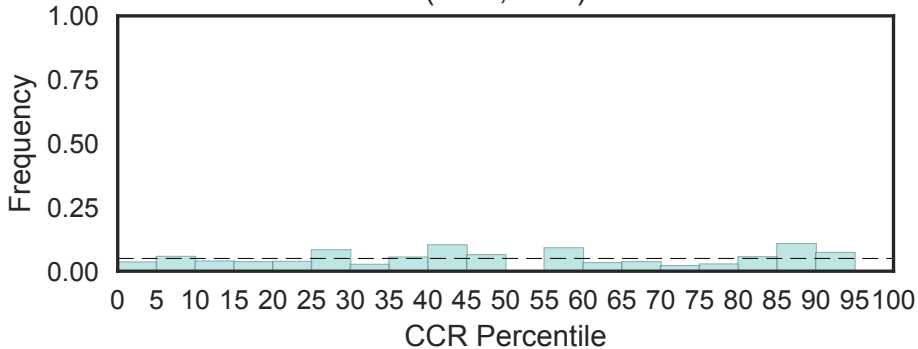

Transcription factor TFIIH complex subunit Tfb5  
(Tfb5, N=1)

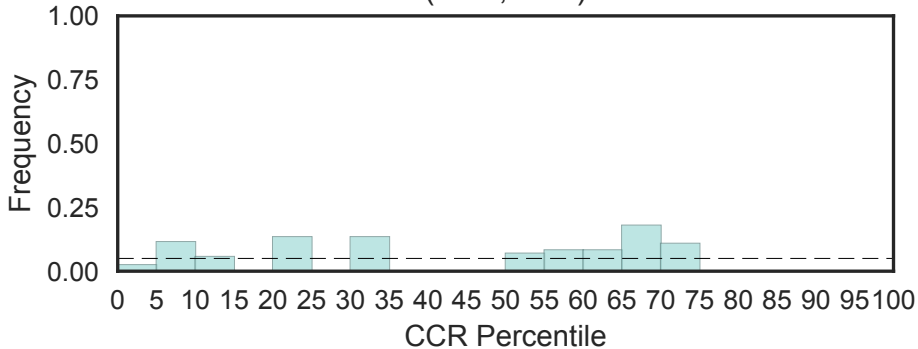

tRNAHis guanylyltransferase  
(Thg1, N=2)

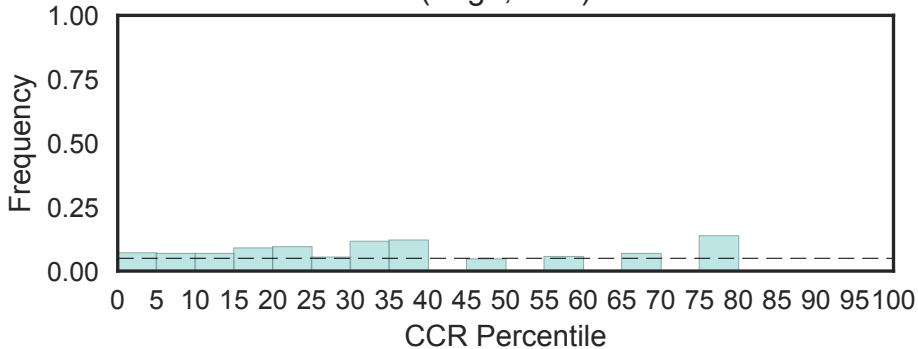



Thg1 C terminal domain  
(Thg1C, N=2)

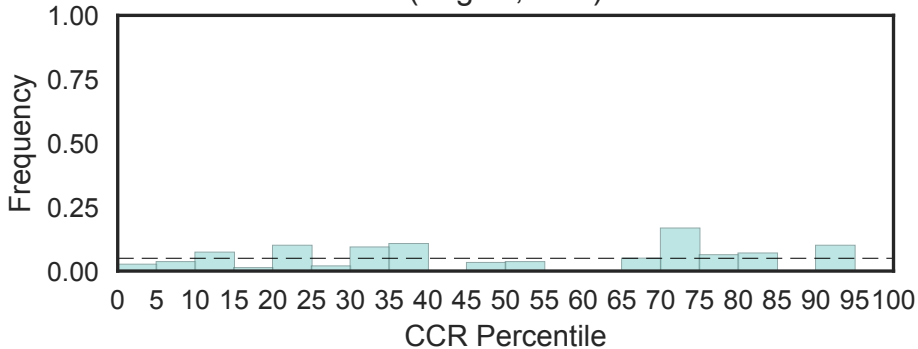

Thi4 family  
(Thi4, N=2)

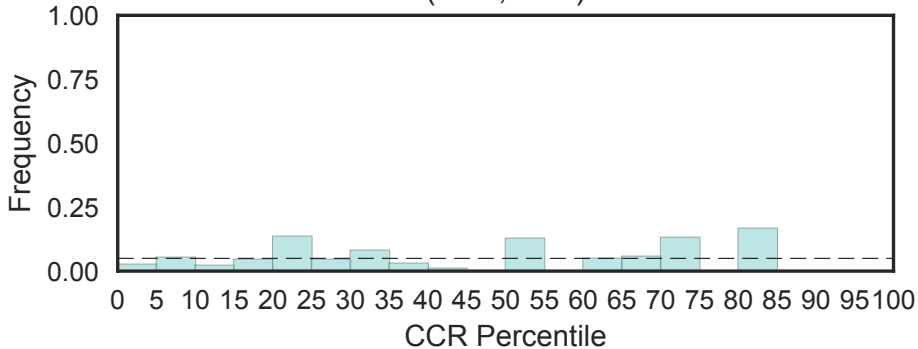

ThiF family  
(ThiF, N=11)

Fisher's OR: 0.928; Bonferroni p-val: 1

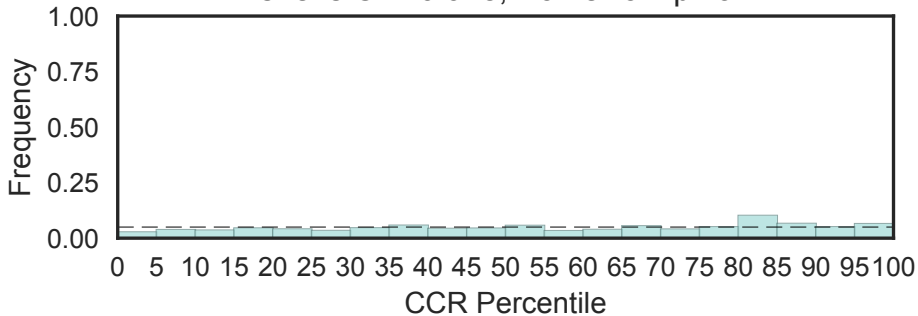

Thiamine biosynthesis protein (Thil)  
(Thil, N=1)

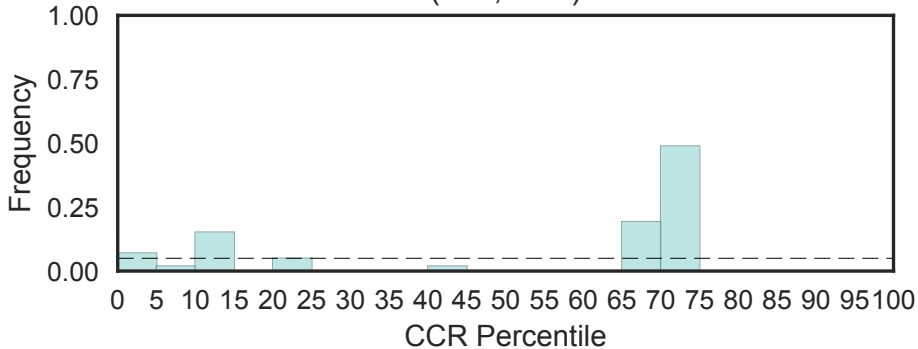

ThiS family  
(ThiS, N=1)

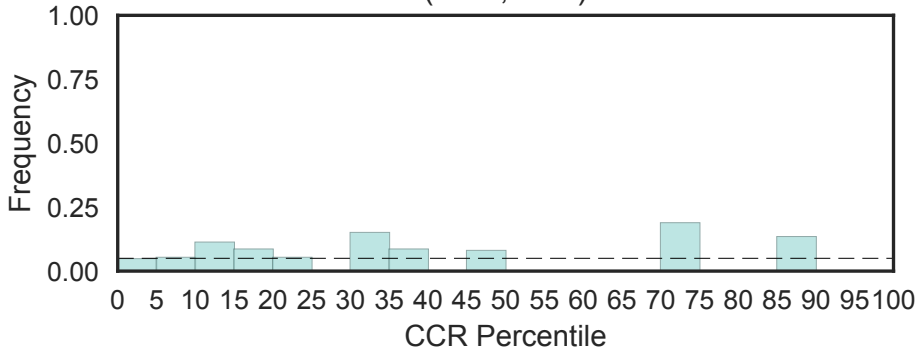

Thioesterase domain  
(Thioesterase, N=2)

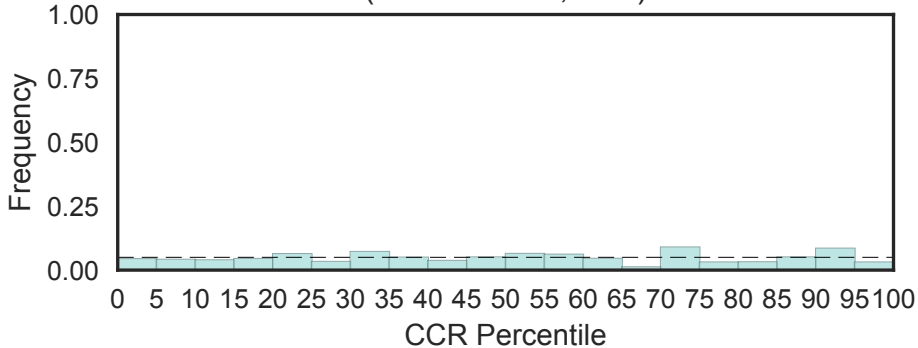

Alpha-macro-globulin thiol-ester bond-forming region  
(Thiol-ester\_cl, N=8)

Fisher's OR: 0; Bonferroni p-val: 1

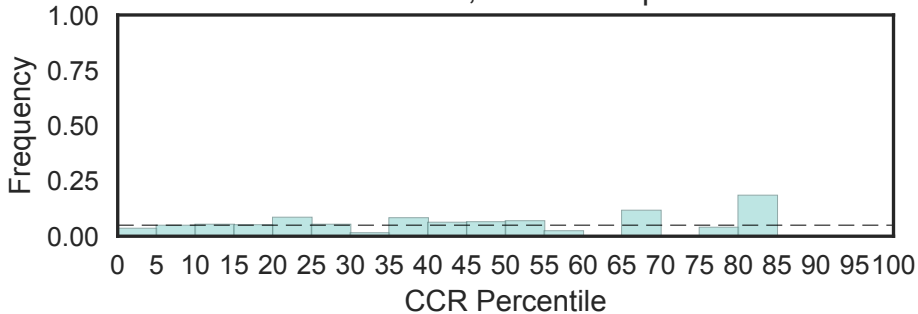

# Thiolase, C-terminal domain

(Thiolase\_C, N=6)

Fisher's OR: 0; Bonferroni p-val: 1

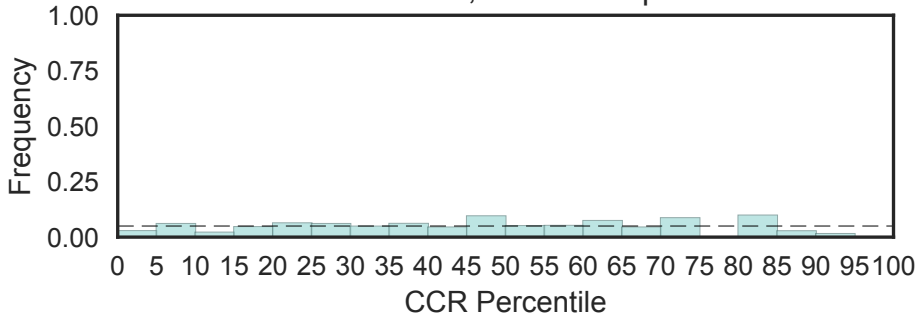



Thiolase, N-terminal domain  
(Thiolase\_N, N=6)

Fisher's OR: 0.168; Bonferroni p-val: 1

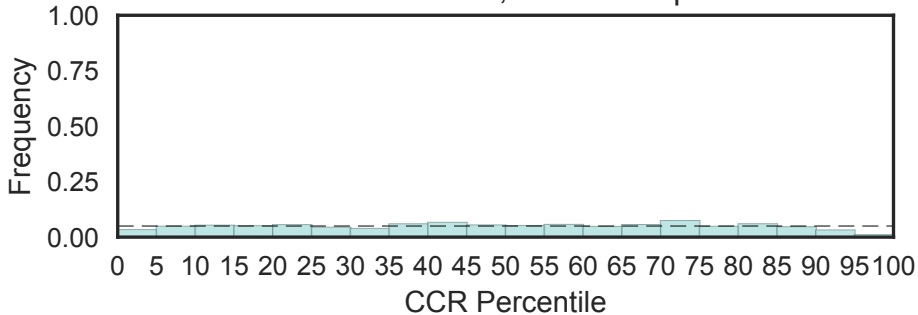

Protein of unknown function, DUF255  
(Thioredox\_DsbH, N=1)

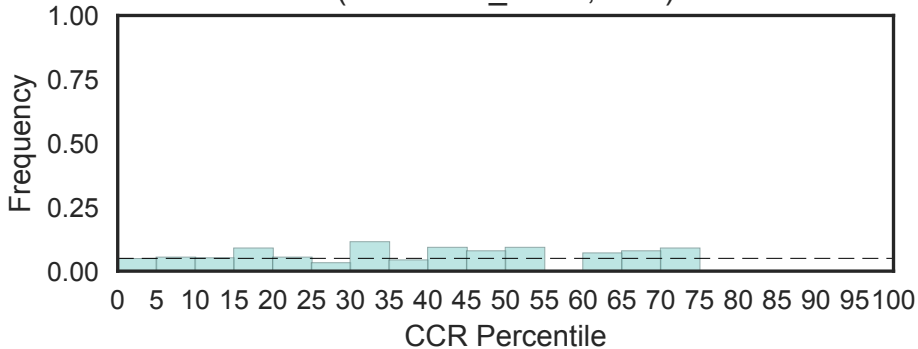

Thioredoxin  
(Thioredoxin, N=49)  
Fisher's OR: 0.591; Bonferroni p-val: 1

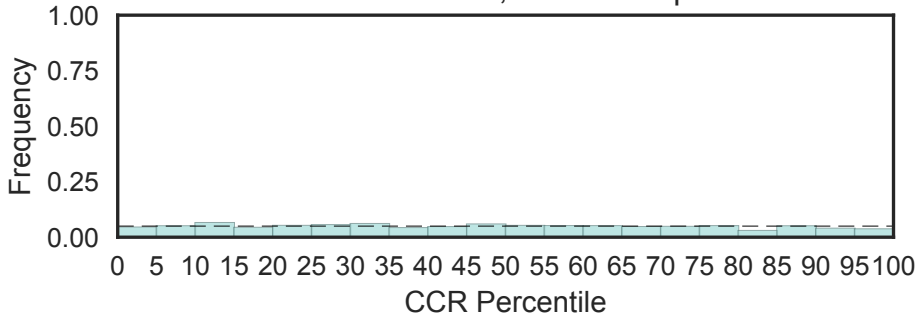

Thioredoxin-like domain  
(Thioredoxin\_2, N=6)  
Fisher's OR: 0; Bonferroni p-val: 1

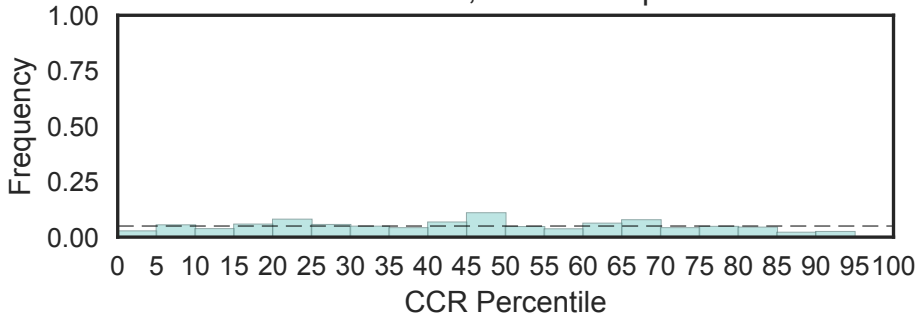

Thioredoxin-like domain  
(Thioredoxin\_6, N=12)

Fisher's OR: 0.745; Bonferroni p-val: 1

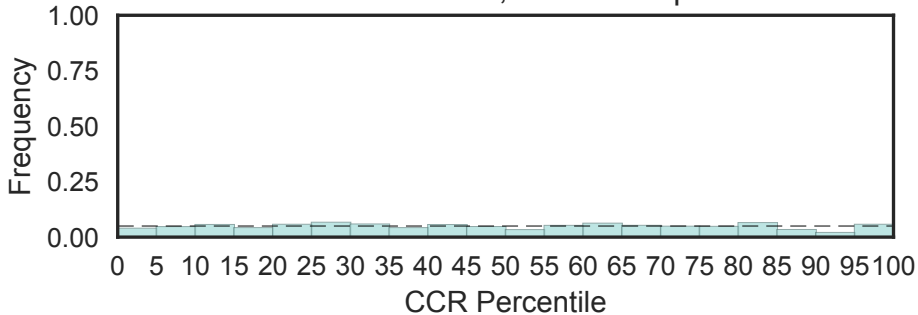

Thioredoxin-like  
(Thioredoxin\_7, N=6)  
Fisher's OR: 0.676; Bonferroni p-val: 1

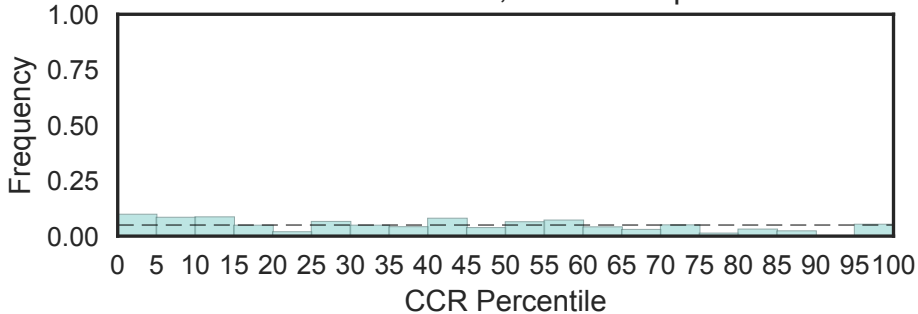

Thioredoxin-like  
(Thioredoxin\_8, N=7)  
Fisher's OR: 0; Bonferroni p-val: 1

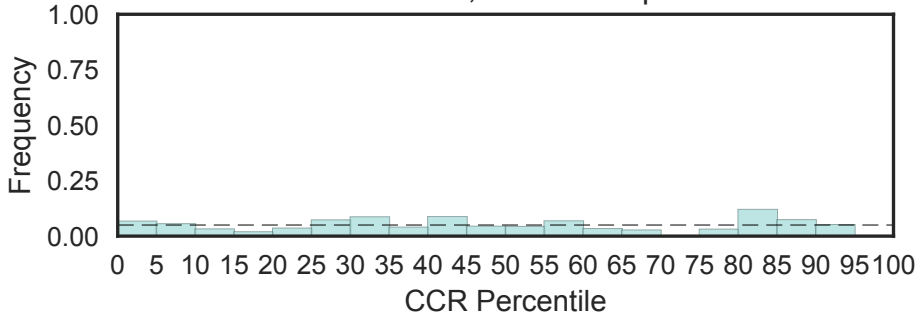

Threonine synthase N terminus  
(Thr\_synth\_N, N=2)

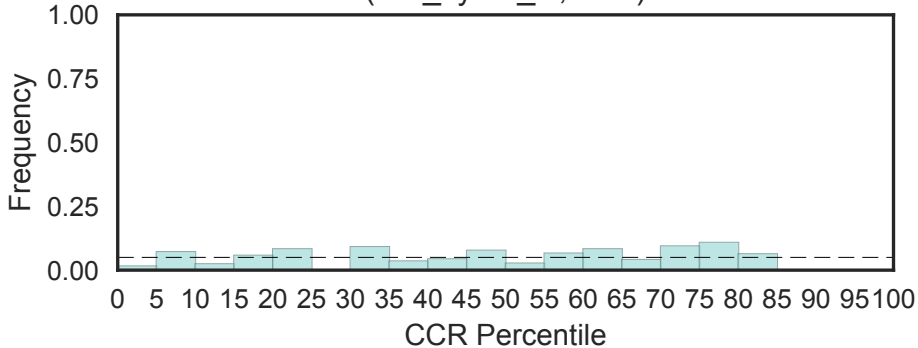



Thrombin light chain  
(Thrombin\_light, N=1)

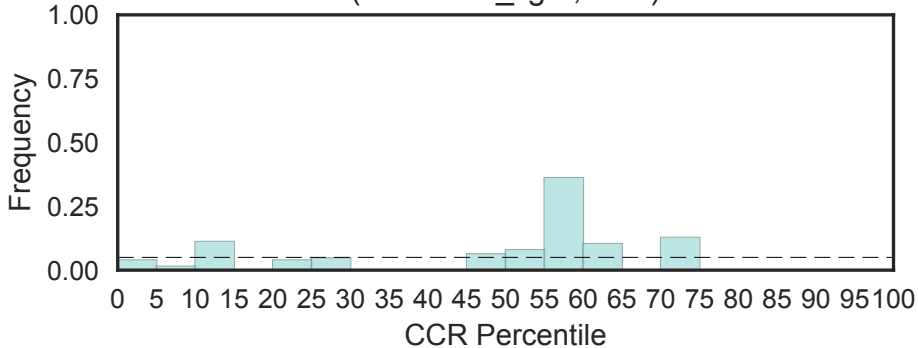

Thymidylate synthase  
(Thymidylat\_synt, N=2)

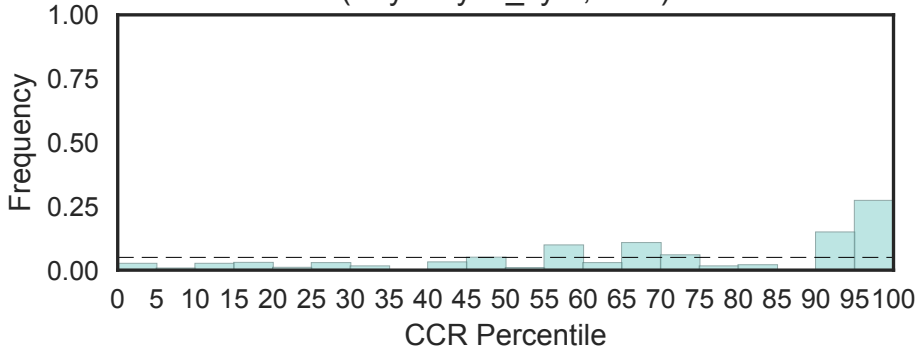

Thymidylate kinase  
(Thymidylate\_kin, N=3)  
Fisher's OR: 2.31; Bonferroni p-val: 1

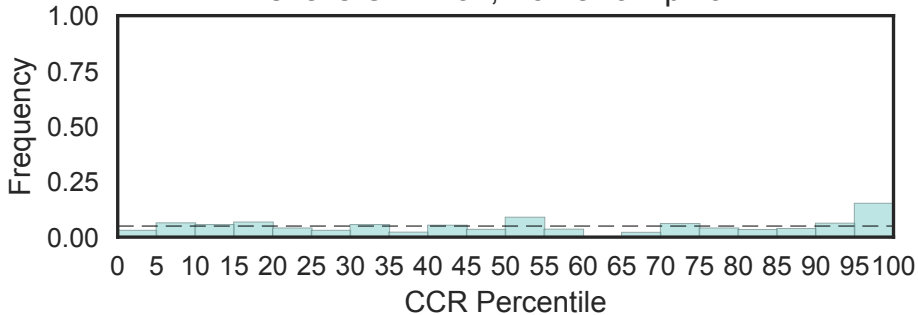

Thymopoietin protein  
(Thymopoietin, N=1)

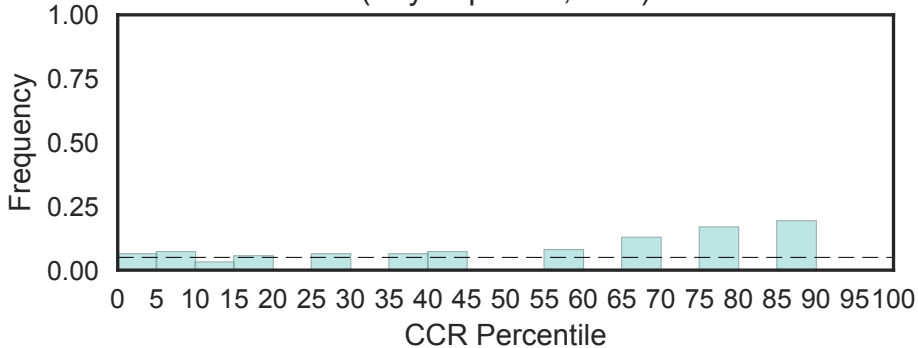

Thymosin beta-4 family  
(Thymosin, N=1)

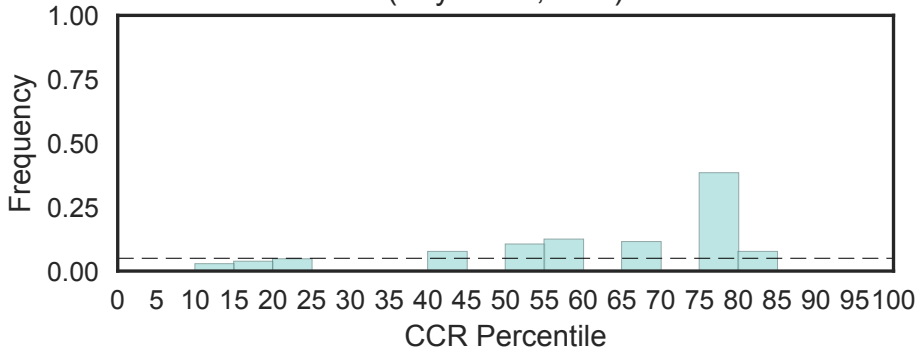

Thyroglobulin\_1 repeat associated disordered domain  
(Thyroglob\_assoc, N=2)

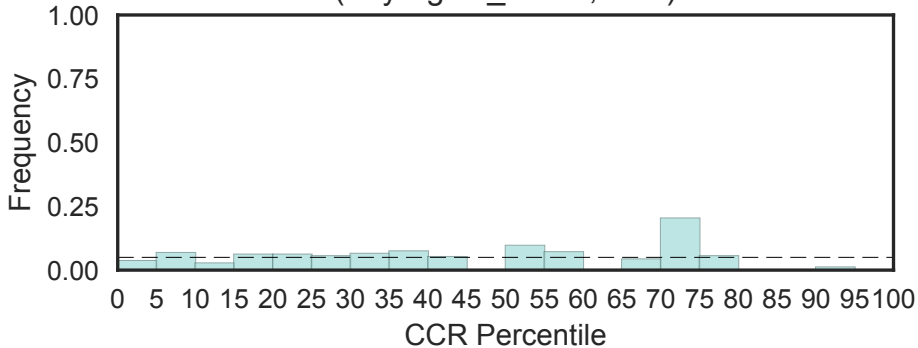

Thyroglobulin type-1 repeat  
(Thyroglobulin\_1, N=29)  
Fisher's OR: 0.296; Bonferroni p-val: 1

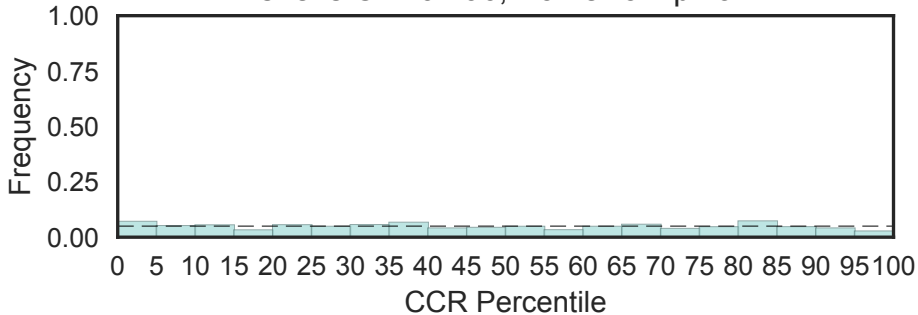

Tim17/Tim22/Tim23/Pmp24 family  
(Tim17, N=11)

Fisher's OR: 0; Bonferroni p-val: 1

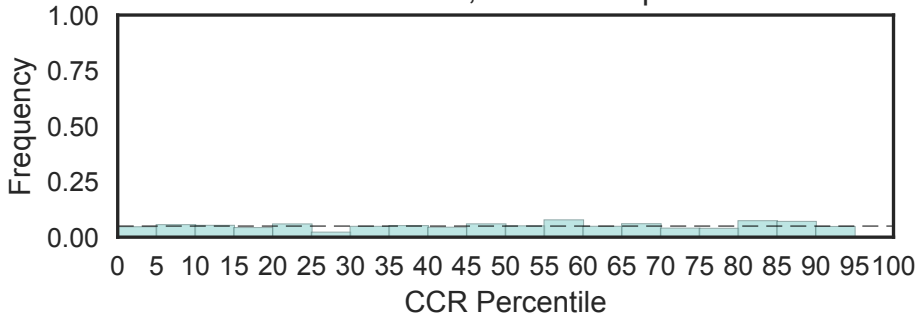



# Translocase of the Inner Mitochondrial membrane 29 (Tim29, N=1)

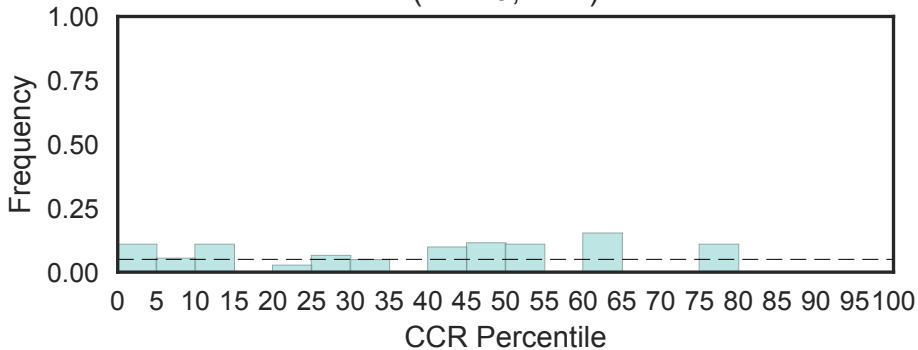

Tim44-like domain  
(Tim44, N=2)

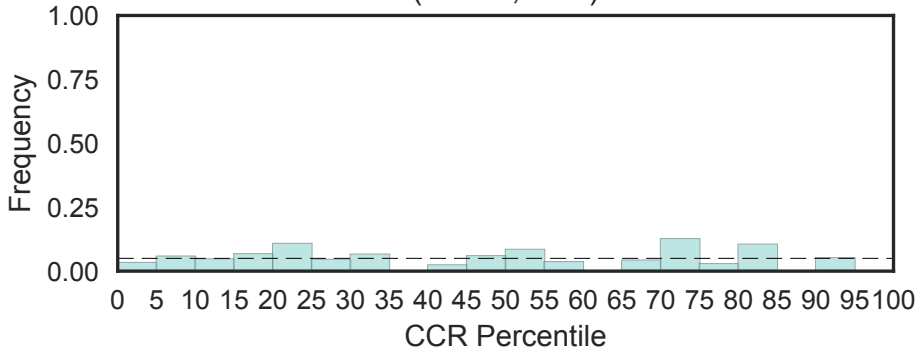

Tis11B like protein, N terminus  
(Tis11B\_N, N=2)

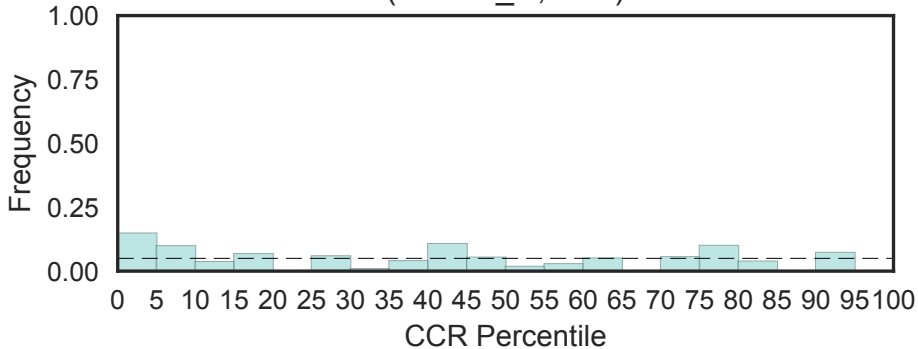

Tissue factor  
(Tissue\_fac, N=15)  
Fisher's OR: 0; Bonferroni p-val: 1

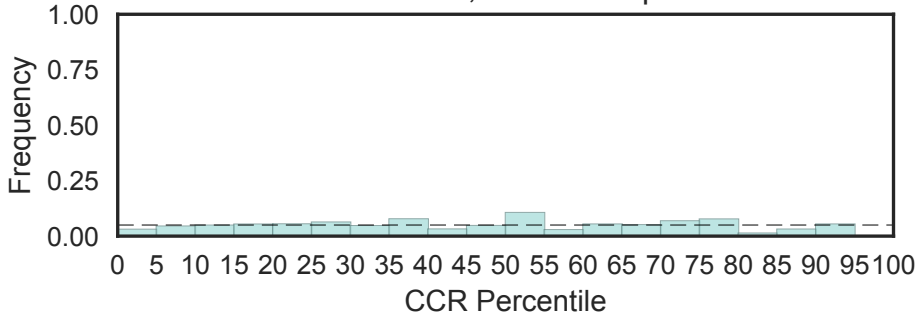

Titin Z  
(Titin\_Z, N=7)

Fisher's OR: 0; Bonferroni p-val: 1

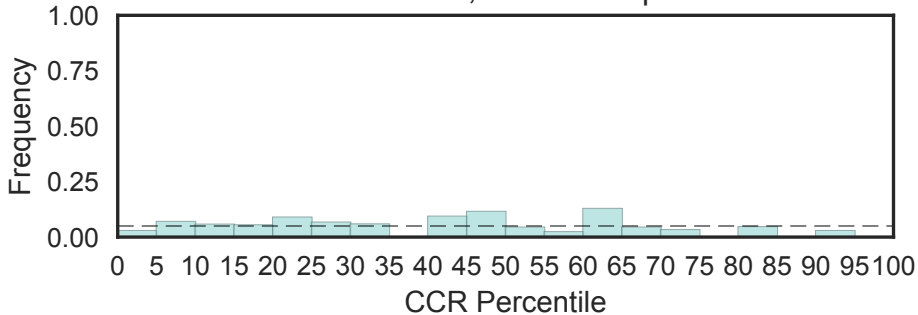

Translation machinery-associated protein 16  
(Tma16, N=1)

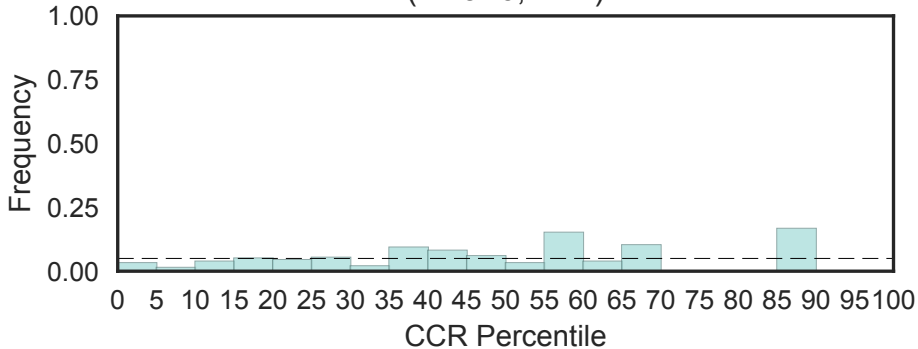

Thrombomodulin like fifth domain, EGF-like  
(Tme5\_EGF\_like, N=1)

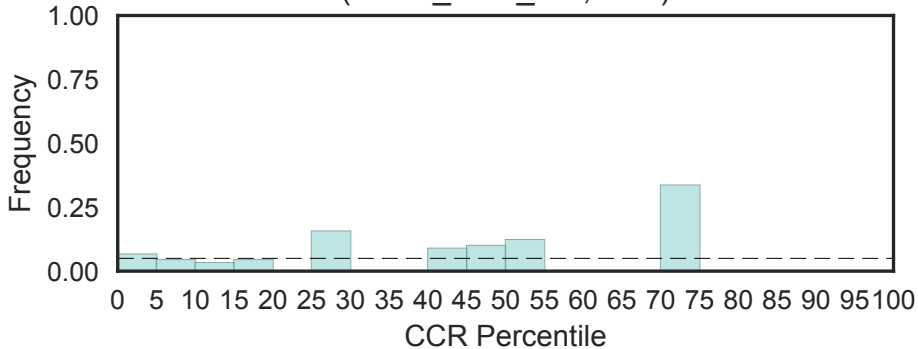

Transmembrane protein 26  
(Tmem26, N=1)

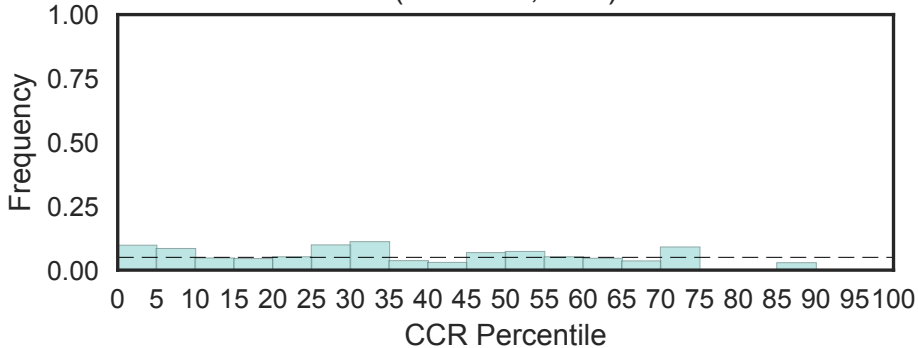



Transmembrane proteins 14C  
(Tmemb\_14, N=4)

Fisher's OR: 0; Bonferroni p-val: 1

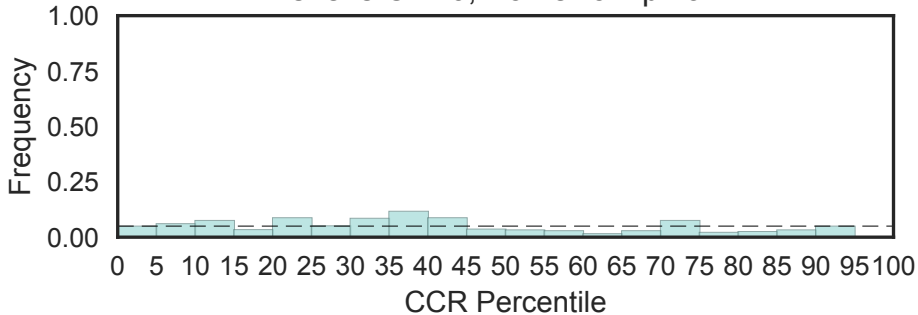

Predicted transmembrane protein 161AB  
(Tmemb\_161AB, N=2)

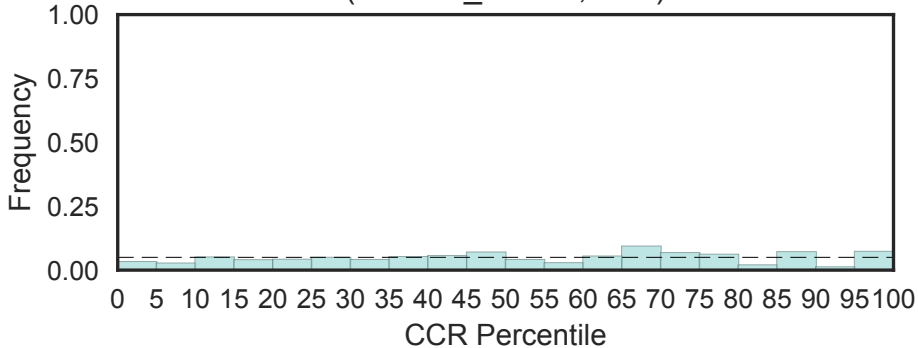

Putative transmembrane protein 170  
(Tmemb\_170, N=3)

Fisher's OR: 0; Bonferroni p-val: 1

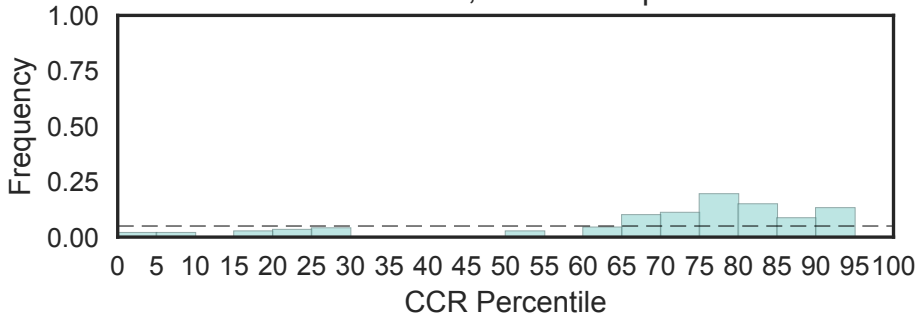

Transmembrane Fragile-X-F protein  
(Tmemb\_185A, N=3)  
Fisher's OR: 0.974; Bonferroni p-val: 1

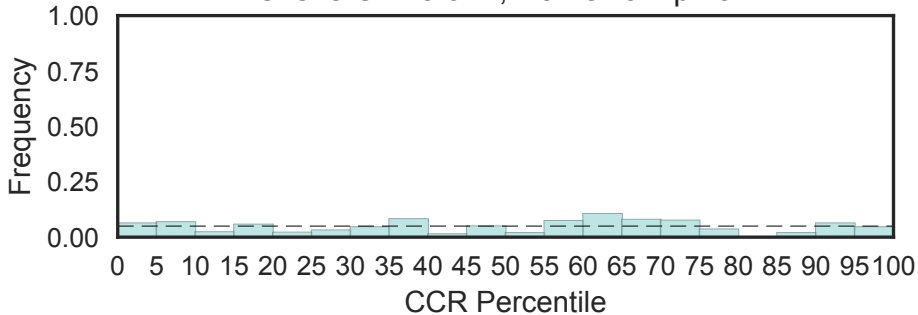

Transmembrane protein 188  
(Tmemb\_18A, N=1)

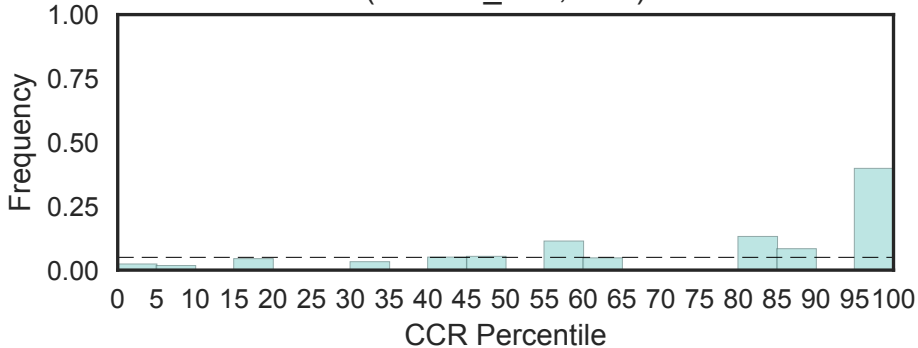

Predicted membrane protein  
(Tmemb\_40, N=1)

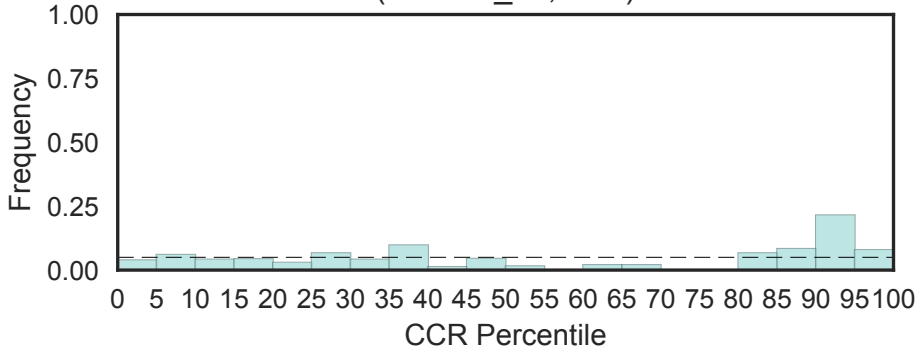

Transmembrane protein 55A  
(Tmemb\_55A, N=2)

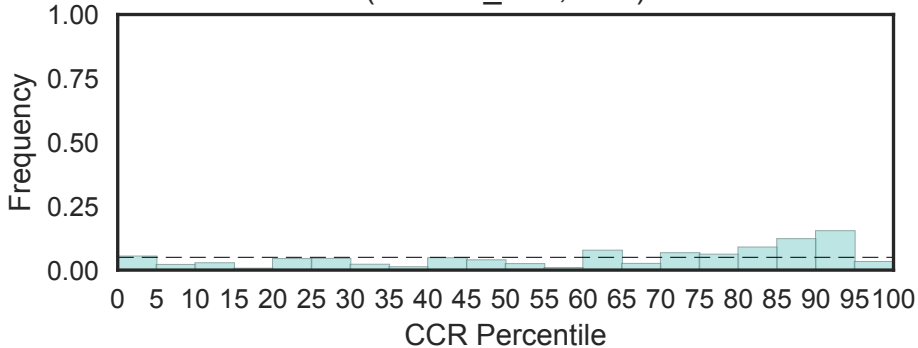

TMEM9  
(Tmemb\_9, N=2)

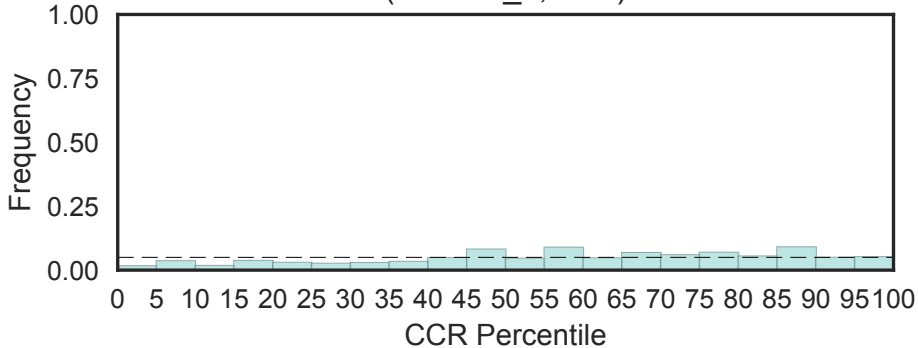



Predicted transmembrane and coiled-coil 2 protein  
(Tmemb\_cc2, N=4)

Fisher's OR: 3.65; Bonferroni p-val: 0.345

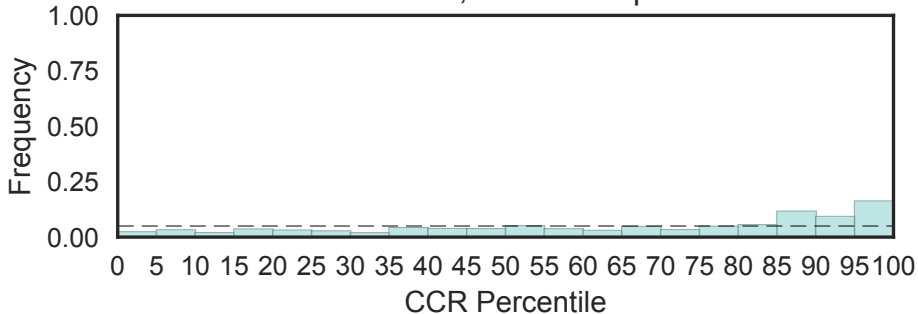

Putative transmembrane protein  
(Ttmp39, N=2)

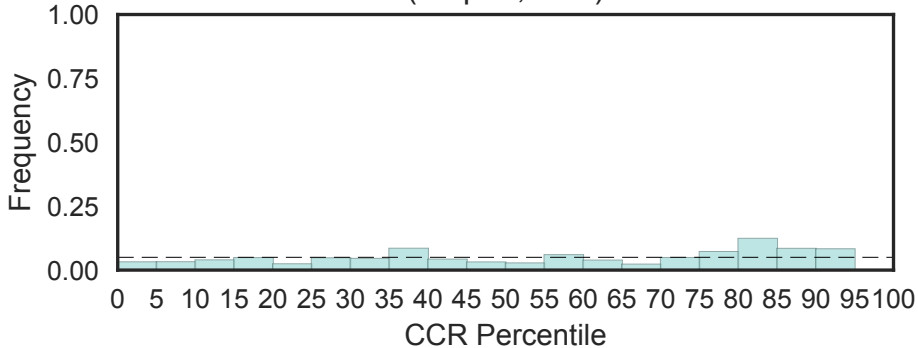

Putative transmembrane protein precursor  
(Tmpp129, N=1)

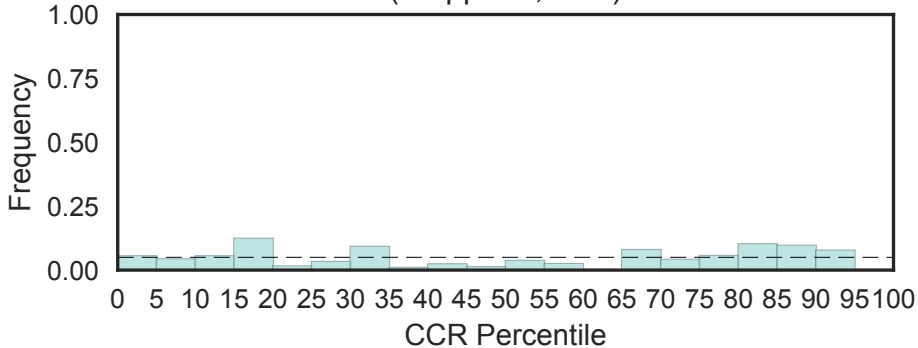

L1 transposable element dsRBD-like domain  
(Tnp\_22\_dsRBD, N=2)

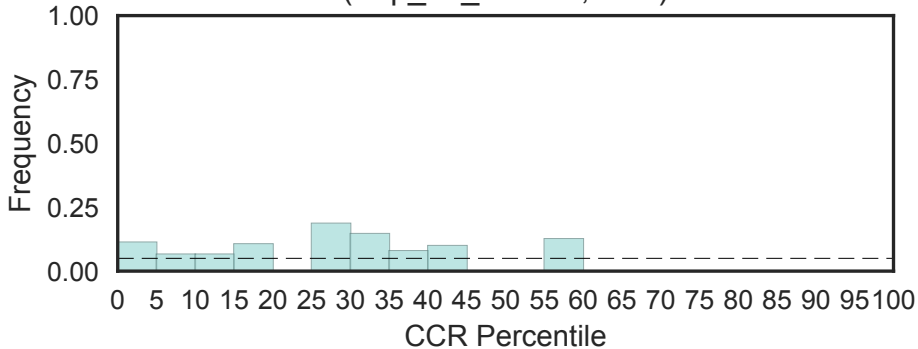

Transposase protein  
(Tnp\_P\_element, N=1)

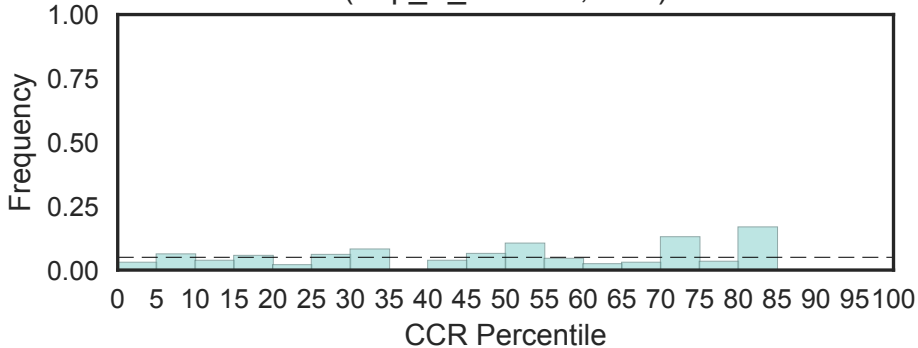

DDE\_Tnp\_1-like zinc-ribbon  
(Tnp\_zf-ribbon\_2, N=1)

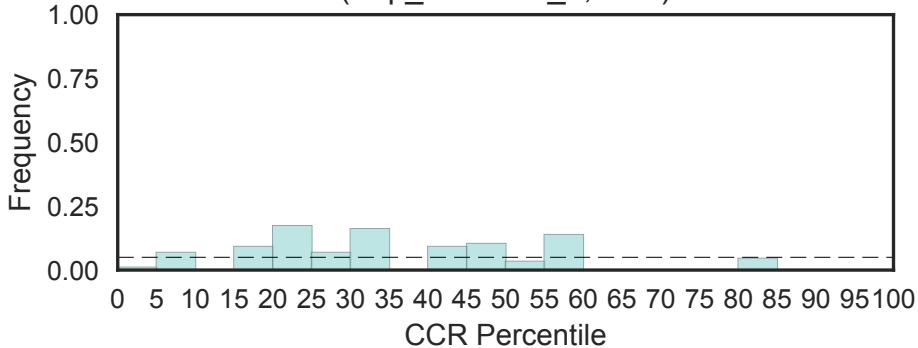

Mitochondrial import receptor subunit Tom22  
(Tom22, N=1)

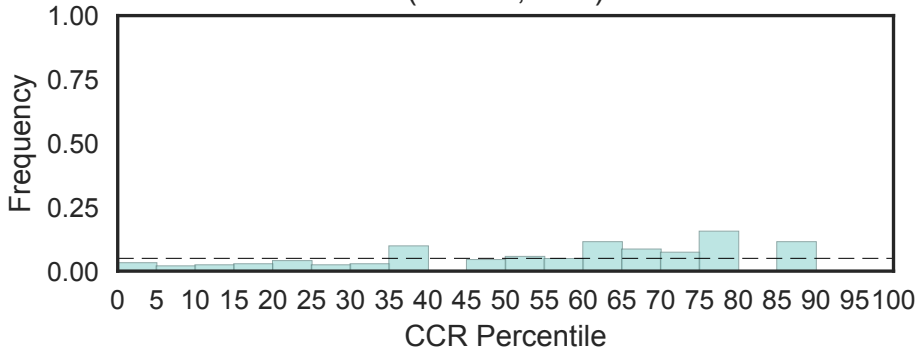

Outer mitochondrial membrane transport complex protein  
(Tom37, N=4)

Fisher's OR: 2.08; Bonferroni p-val: 1

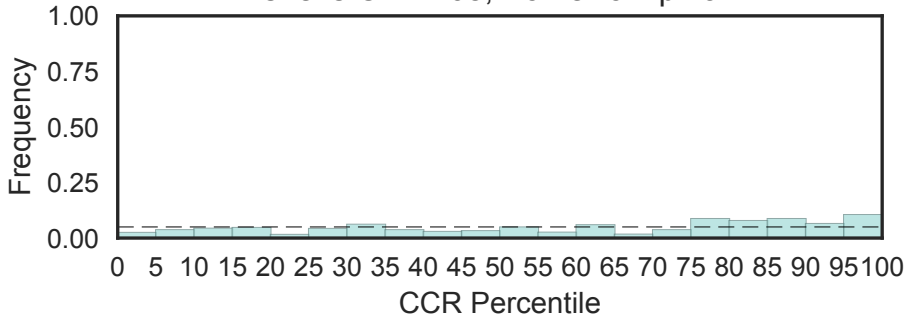



TOM7 family  
(Tom7, N=1)

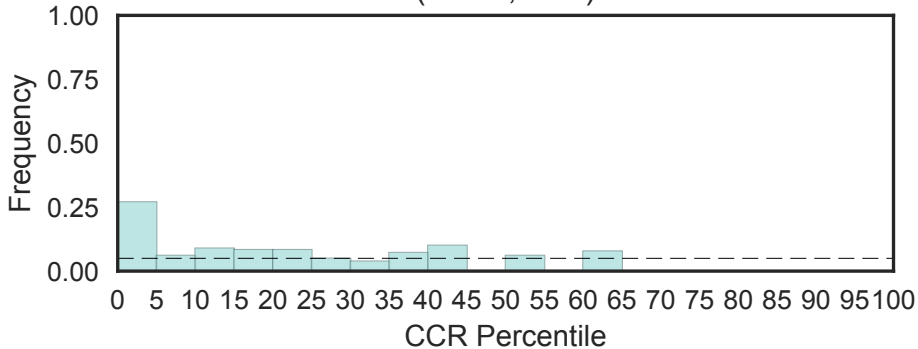

C-terminal topoisomerase domain  
(Topo\_C\_assoc, N=2)

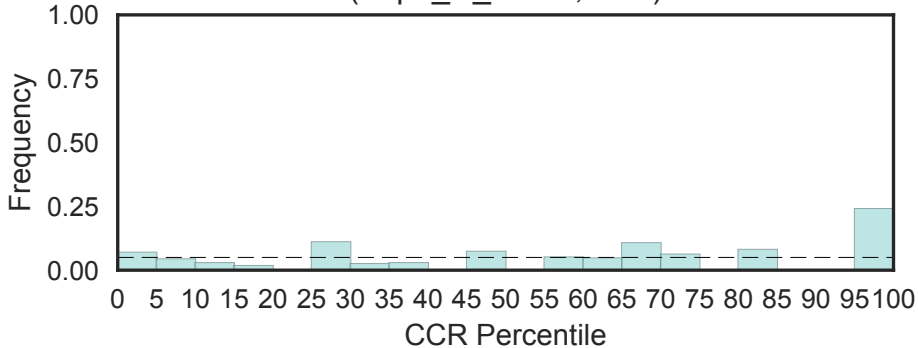

Eukaryotic DNA topoisomerase I, catalytic core  
(Topoisom\_I, N=2)

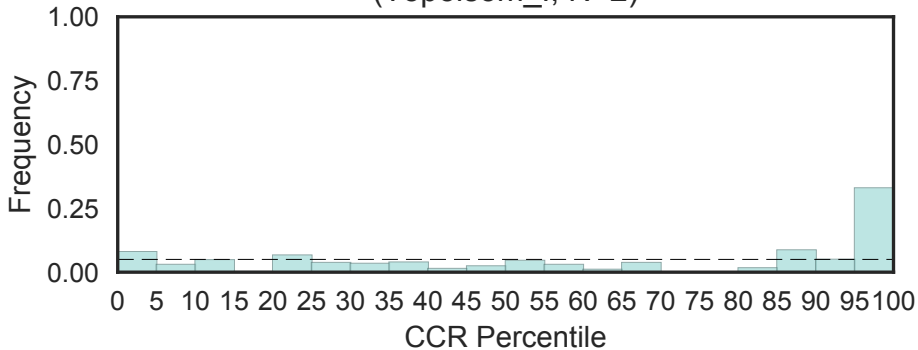

# Eukaryotic DNA topoisomerase I, DNA binding fragment (Topoisom\_I\_N, N=2)

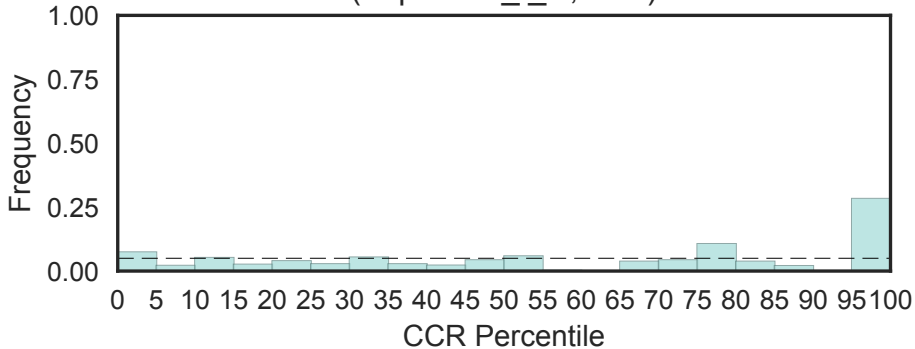

DNA topoisomerase  
(Topoisom\_bac, N=2)

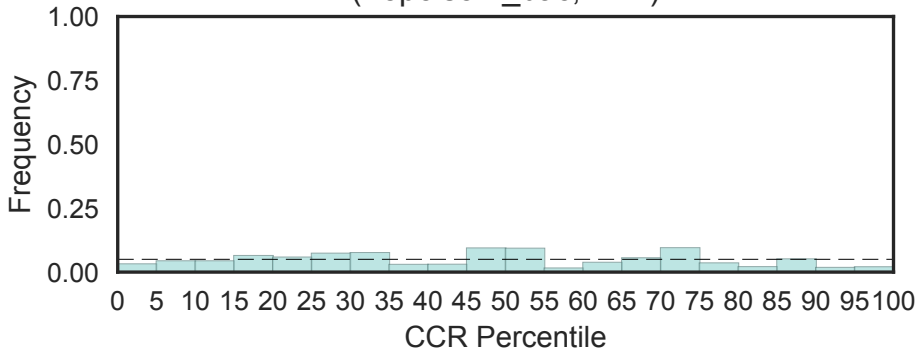

Toprim domain  
(Toprim, N=4)

Fisher's OR: 6.76; Bonferroni p-val: 0.753

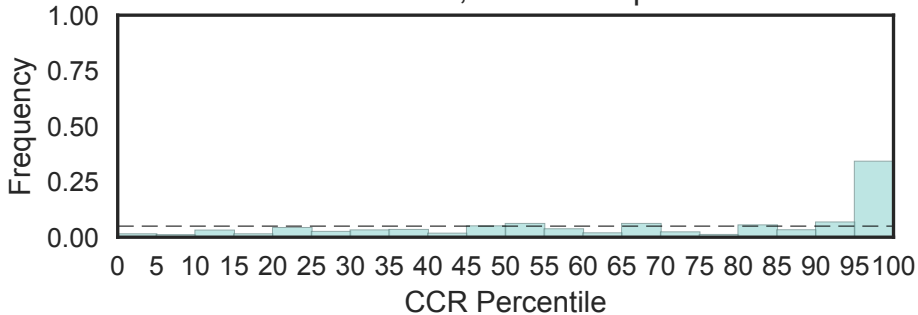

Torsin  
(Torsin, N=5)

Fisher's OR: 0; Bonferroni p-val: 1

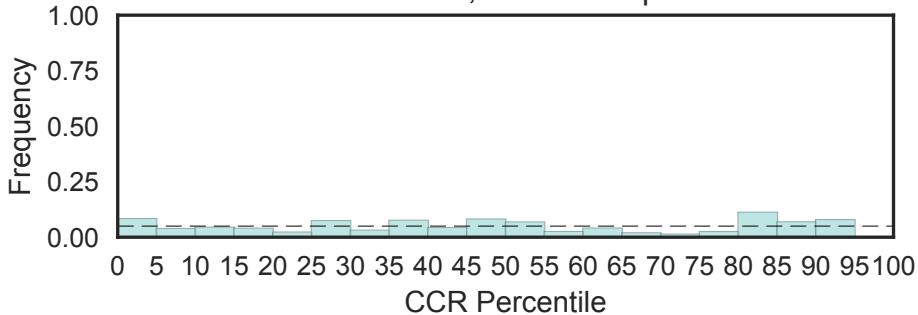

Tower  
(Tower, N=1)

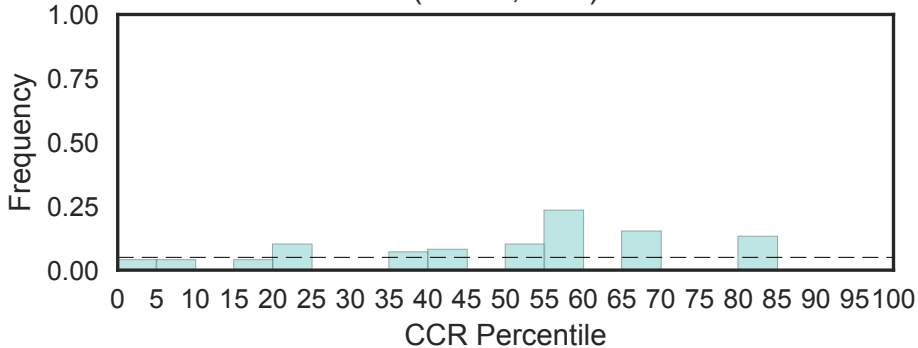



GHH signature containing HNH/Endo VII superfamily nuclease toxin  
(Tox-GHH, N=3)

Fisher's OR: 3.33; Bonferroni p-val: 1

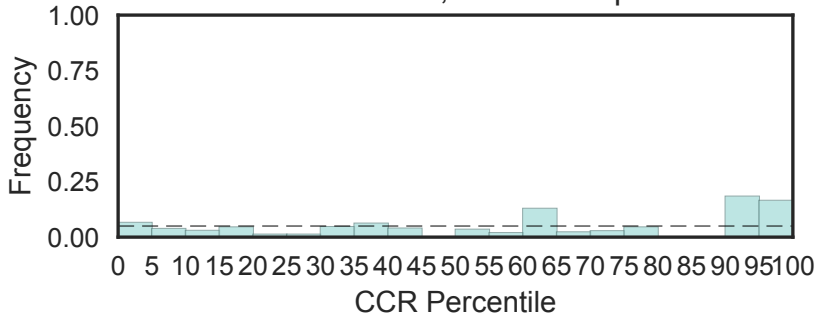

Snake toxin and toxin-like protein  
(Toxin\_TOLIP, N=7)  
Fisher's OR: 0.515; Bonferroni p-val: 1

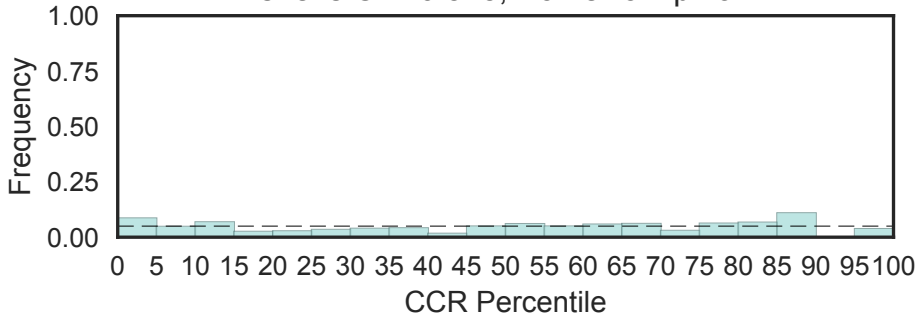

TraB family  
(TraB, N=3)

Fisher's OR: 0.419; Bonferroni p-val: 1

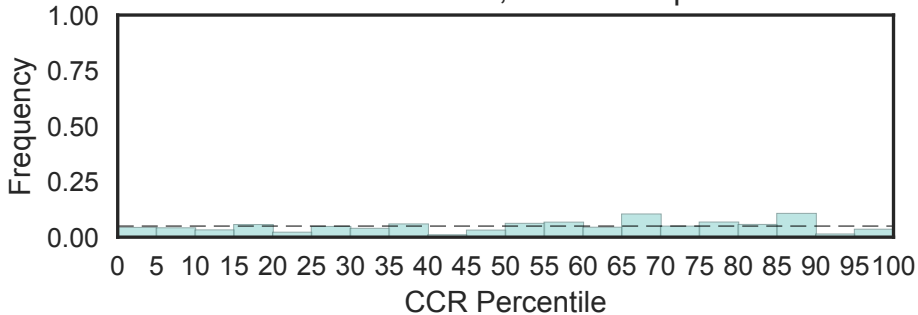

# Type-1V conjugative transfer system mating pair stabilisation (TraN, N=1)

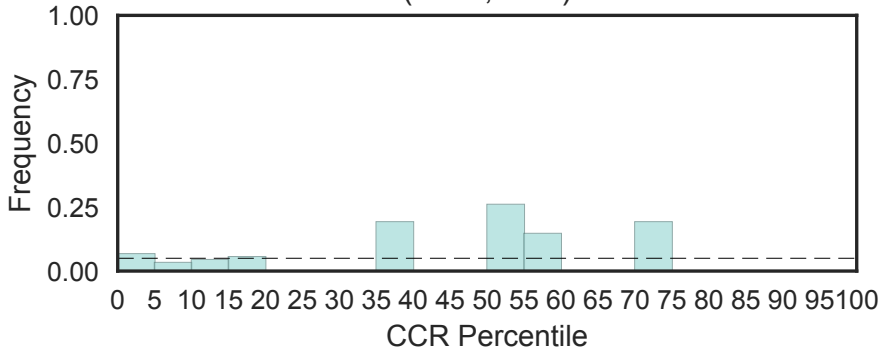

Transcriptional activator  
(Transcrip\_act, N=1)

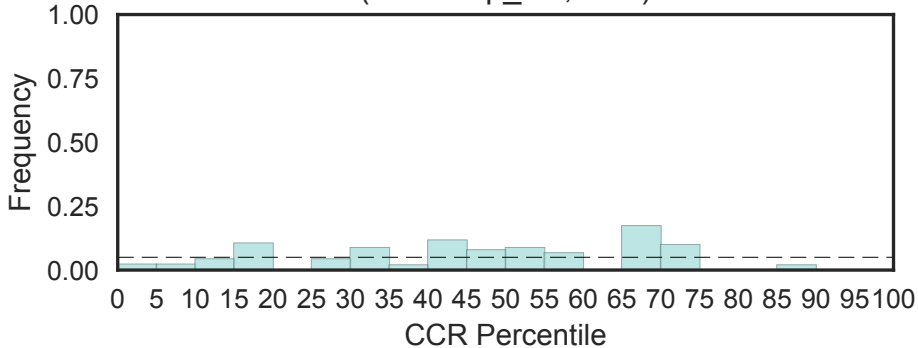

Transcriptional regulator  
(Transcrip\_reg, N=1)

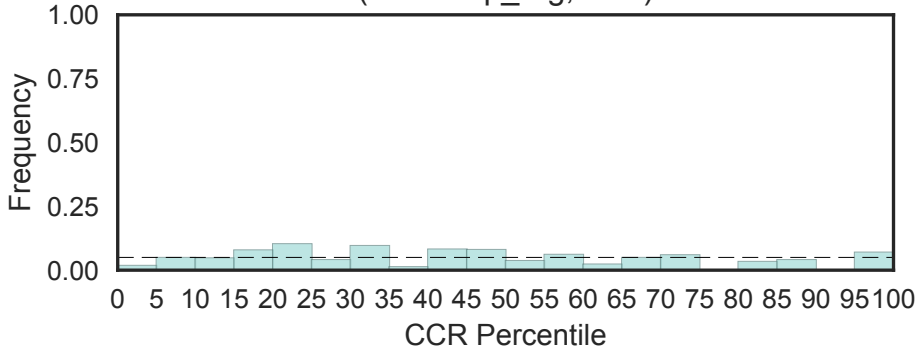

Transferrin  
(Transferrin, N=6)

Fisher's OR: 0; Bonferroni p-val: 1

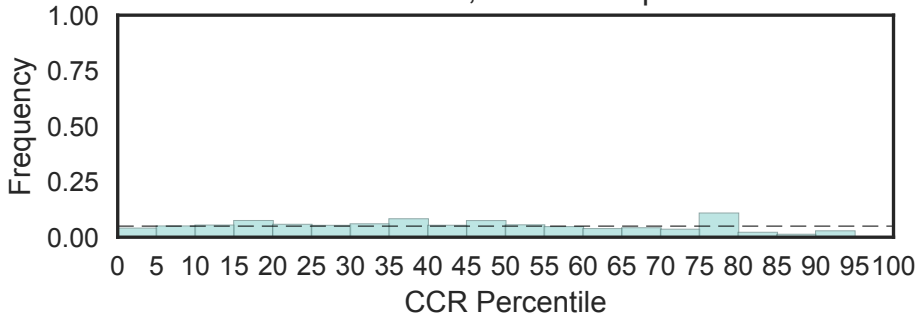

Transglutaminase family, C-terminal ig like domain  
(Transglut\_C, N=16)

Fisher's OR: 0.317; Bonferroni p-val: 1

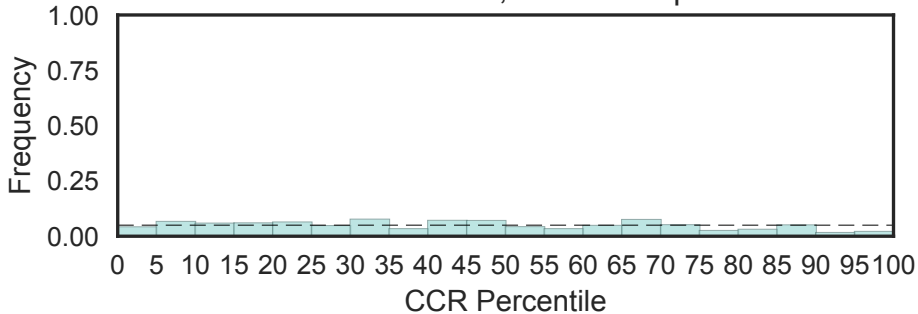



Transglutaminase family  
(Transglut\_N, N=9)

Fisher's OR: 0.215; Bonferroni p-val: 1

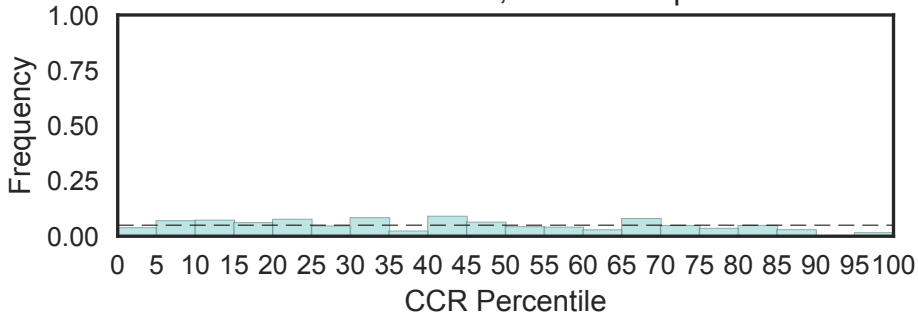

Transglutaminase-like superfamily  
(Transglut\_core, N=11)  
Fisher's OR: 0.244; Bonferroni p-val: 1

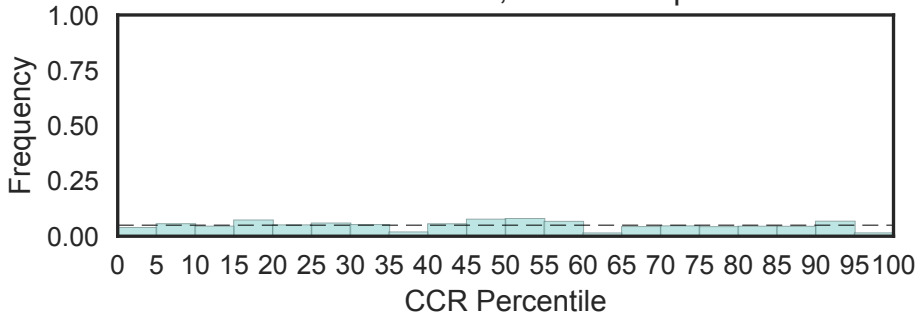

Transglutaminase-like superfamily  
(Transglut\_core2, N=1)

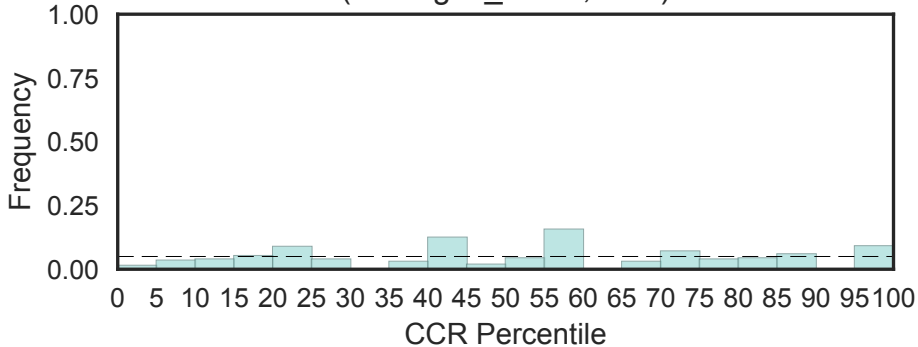

Transketolase, pyrimidine binding domain  
(Transket\_pyr, N=7)

Fisher's OR: 1.07; Bonferroni p-val: 1

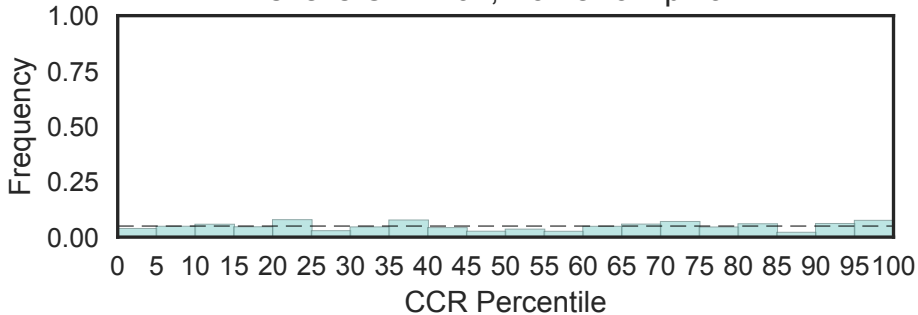

Transketolase, C-terminal domain  
(Transketolase\_C, N=4)  
Fisher's OR: 0; Bonferroni p-val: 1

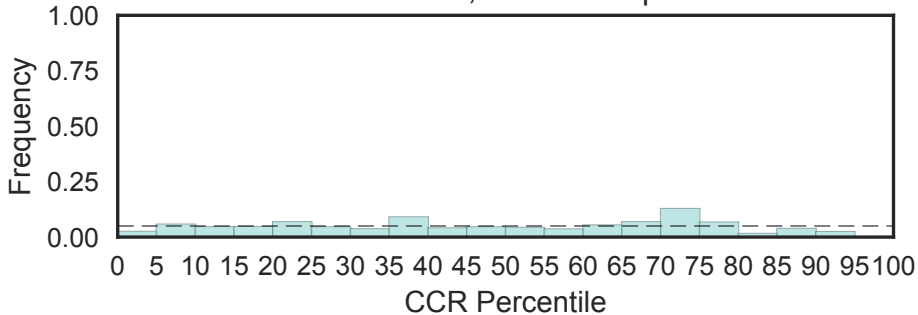

Transketolase, thiamine diphosphate binding domain  
(Transketolase\_N, N=2)

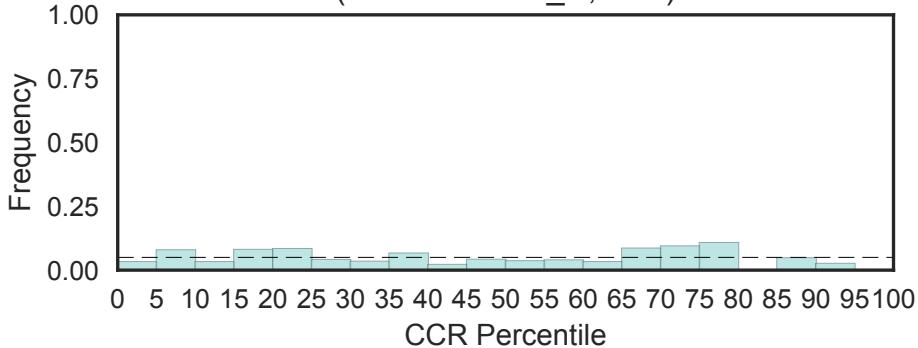

Translin family  
(Translin, N=2)

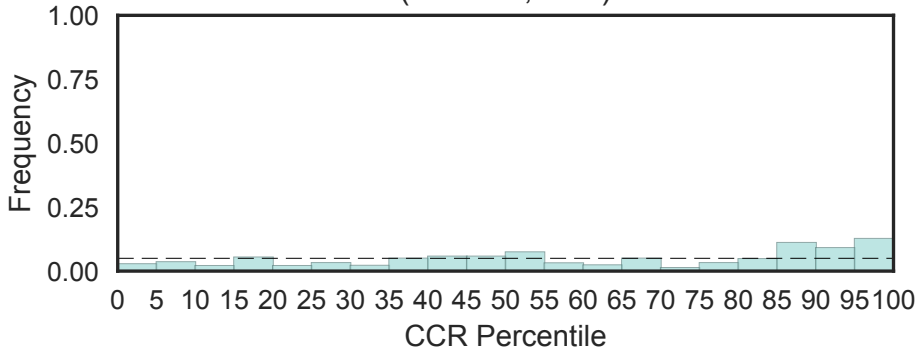

Predicted membrane protein  
(Transmemb\_17, N=3)  
Fisher's OR: 0; Bonferroni p-val: 1

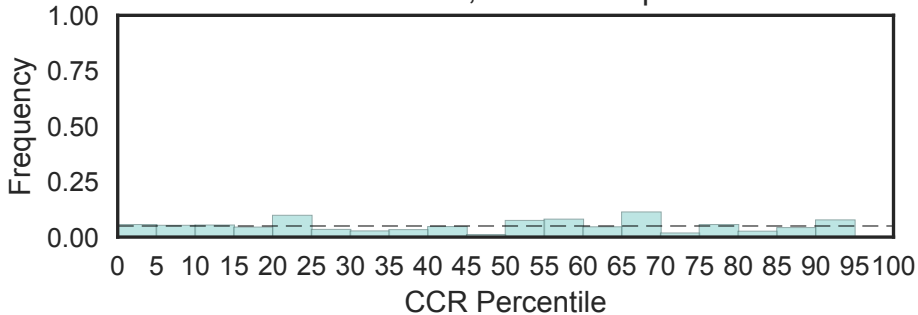



Transposase (partial DDE domain)  
(Transposase\_1, N=1)

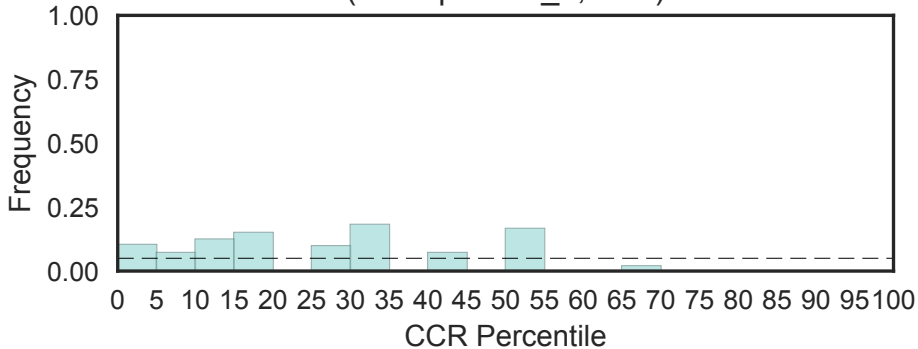

# HIUase/Transthyretin family (Transthyretin, N=1)

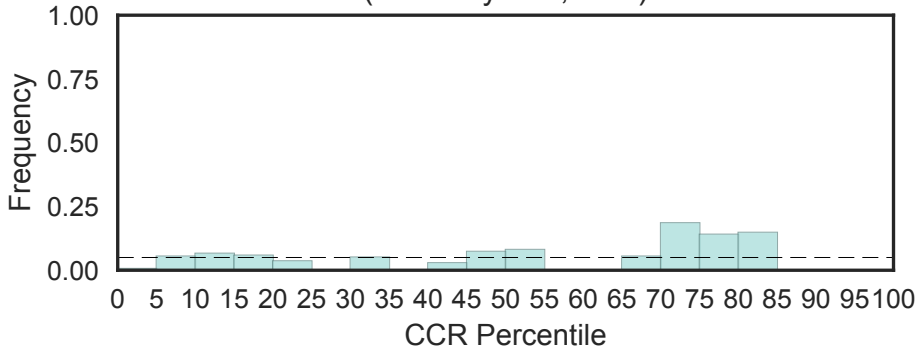

Treacher Collins syndrome protein Treacle  
(Treacle, N=2)

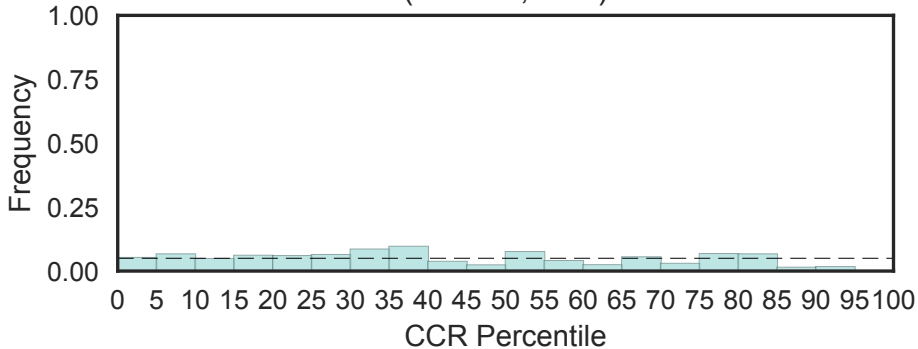

Trefoil (P-type) domain  
(Trefoil, N=11)

Fisher's OR: 0; Bonferroni p-val: 1

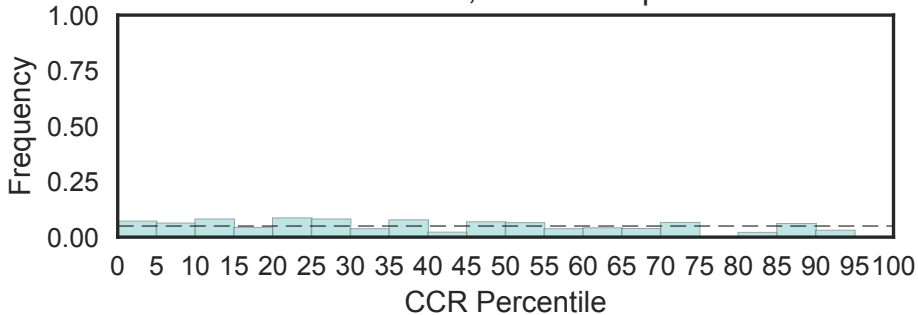

# Trehalase

(Trehalase, N=1)

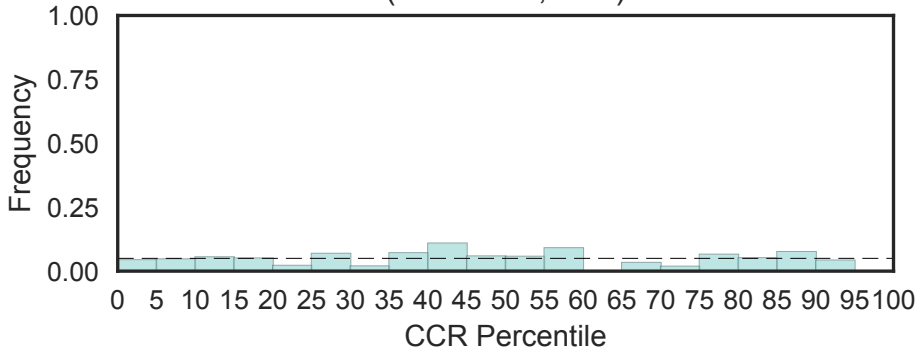

Treslin N-terminus  
(Treslin\_N, N=1)

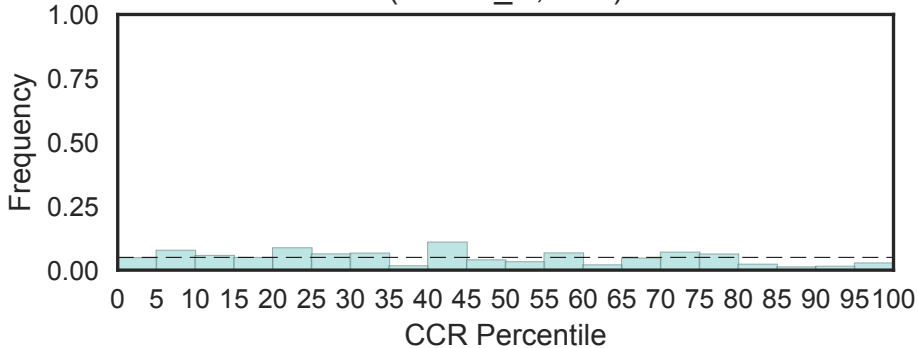

Triabin  
(Triabin, N=1)

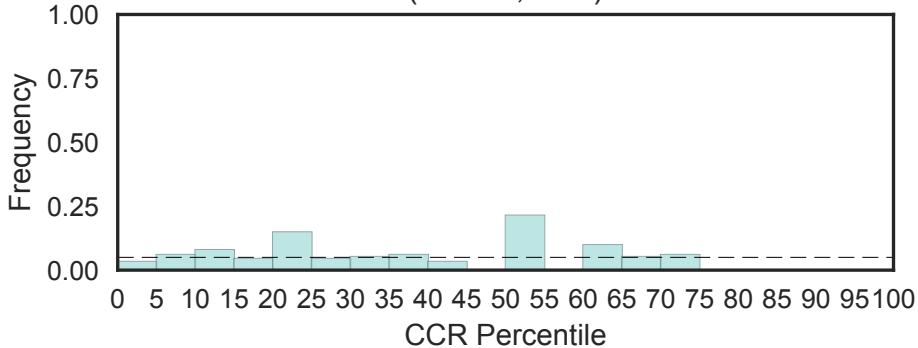

Trimerisation motif  
(Trimer\_CC, N=1)

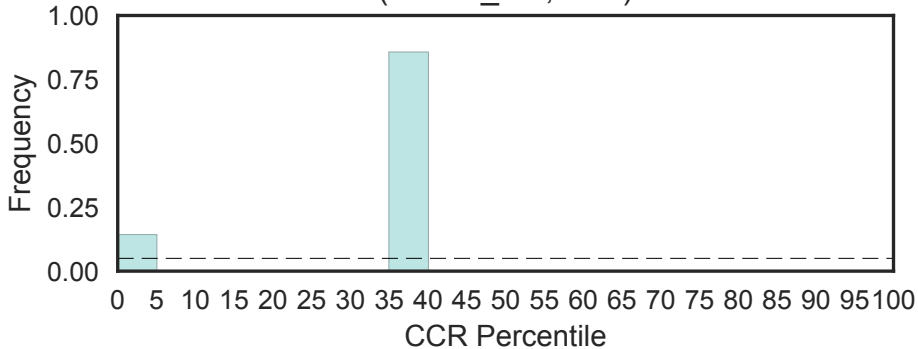



# Unstructured region on methyltransferase between zinc-fingers (Tristanin\_u2, N=1)

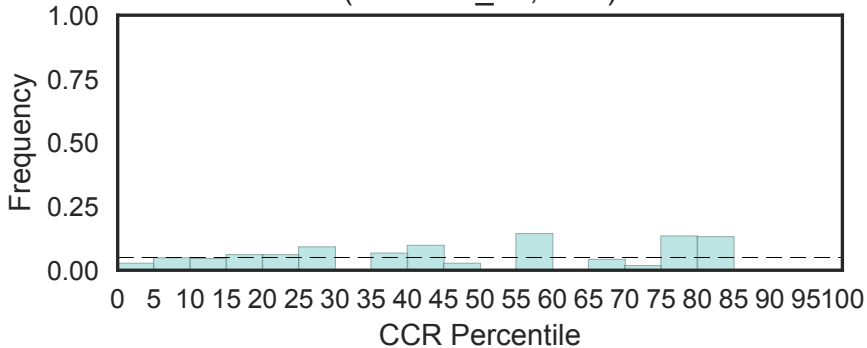

TrkA-N domain  
(TrkA\_N, N=1)

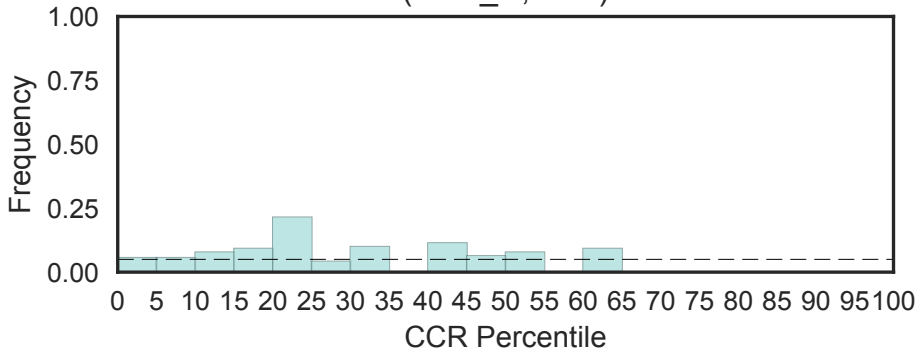

Trm112p-like protein  
(Trm112p, N=2)

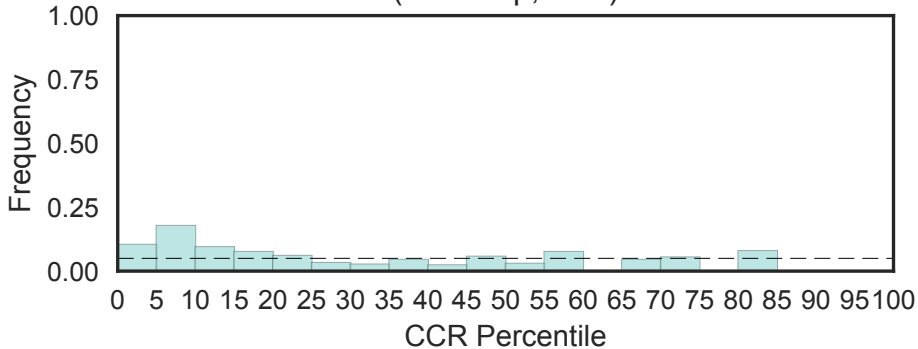

GTP-binding protein TrmE N-terminus  
(TrmE\_N, N=1)

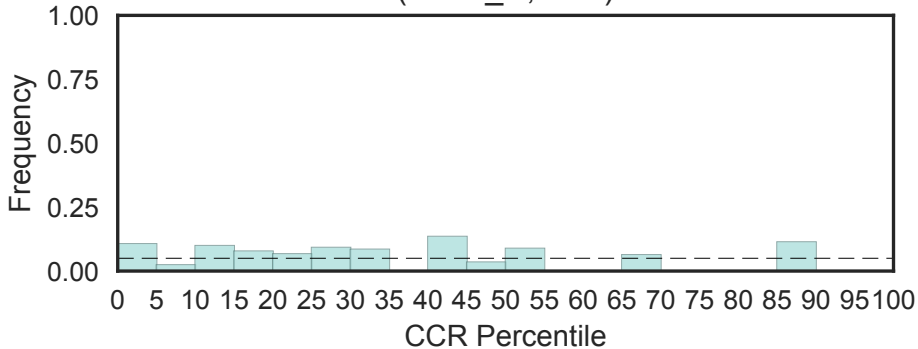

Tropomodulin  
(Tropomodulin, N=7)  
Fisher's OR: 0; Bonferroni p-val: 1

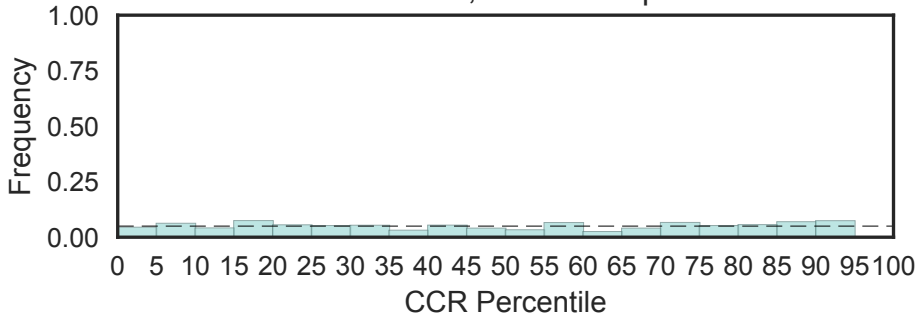

Tropomyosin  
(Tropomyosin, N=4)

Fisher's OR: 3.99; Bonferroni p-val: 0.26

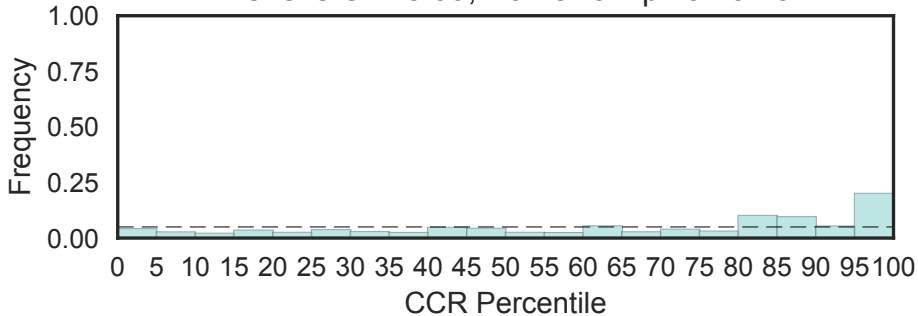

Tropomyosin like  
(Tropomyosin\_1, N=4)

Fisher's OR: 5.73; Bonferroni p-val: 0.289

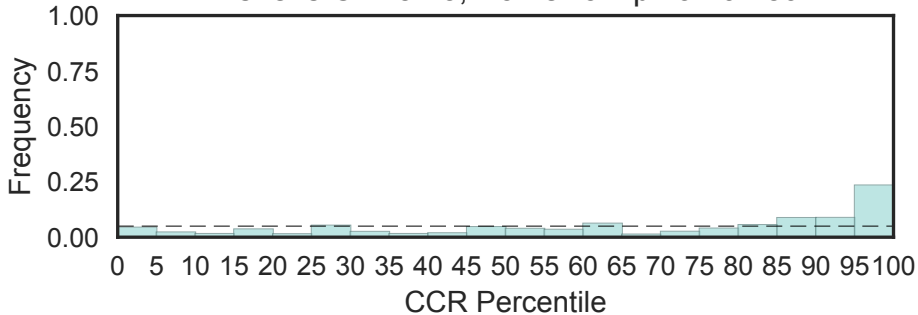

Troponin  
(Troponin, N=8)

Fisher's OR: 1.53; Bonferroni p-val: 1

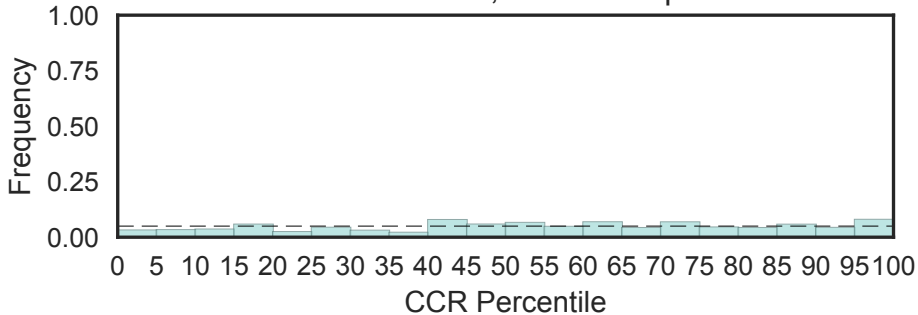



Troponin I residues 1-32  
(Troponin-I\_N, N=1)

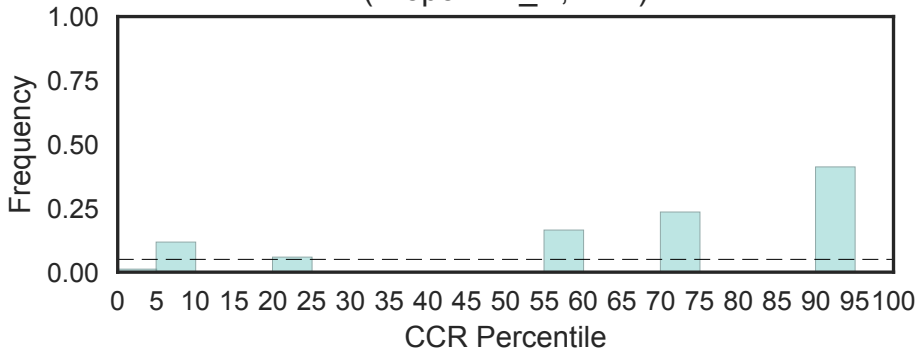

Tryptophan/tyrosine permease family  
(Trp\_Tyr\_perm, N=2)

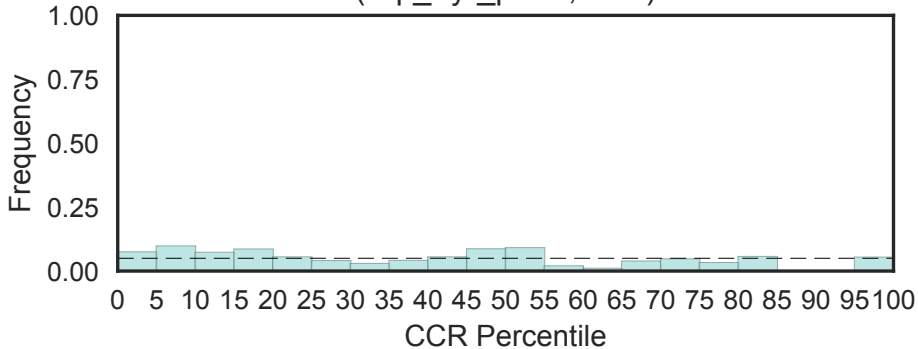

Tryptophan 2,3-dioxygenase  
(Trp\_dioxygenase, N=1)

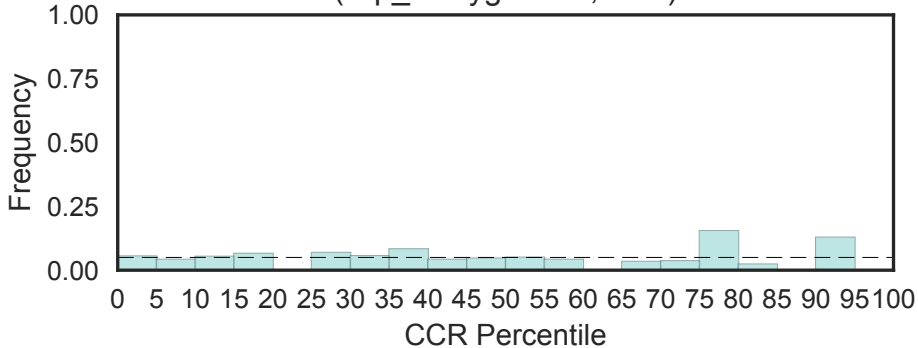

TruB family pseudouridylate synthase (N terminal domain)  
(TruB\_N, N=2)

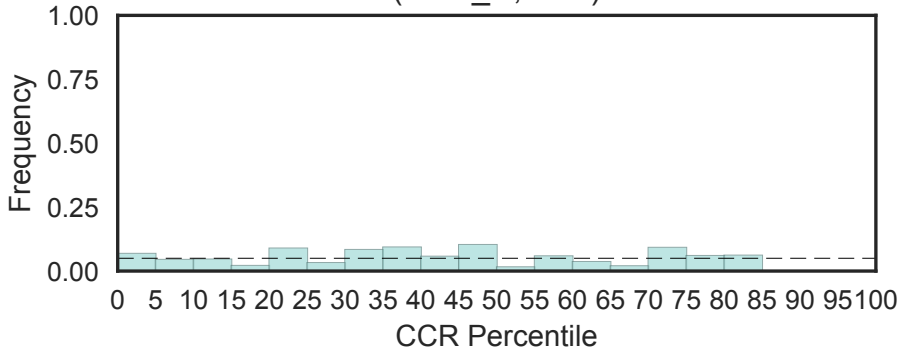

tRNA pseudouridine synthase D (TruD)  
(TruD, N=2)

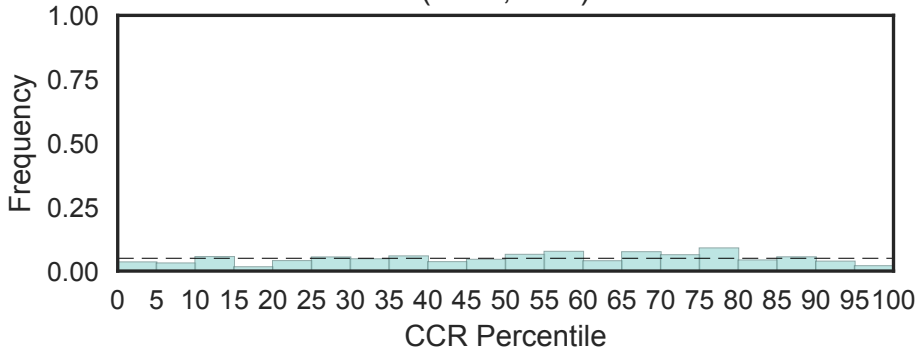

Trypanosome variant surface glycoprotein C-terminal domain  
(Trypan\_glycop\_C, N=1)

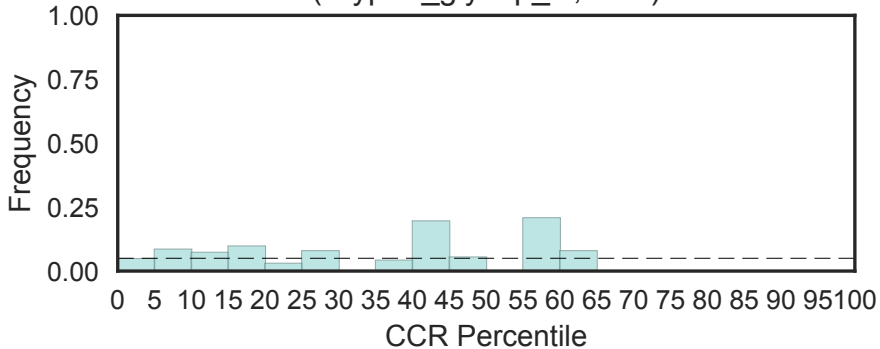

Trypsin  
(Trypsin, N=133)

Fisher's OR: 0.188; Bonferroni p-val: 5.16e-17

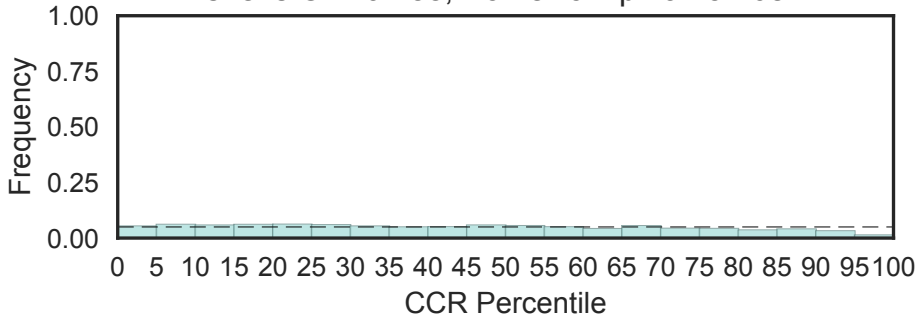

Trypsin-like peptidase domain  
(Trypsin\_2, N=42)

Fisher's OR: 0.286; Bonferroni p-val: 1

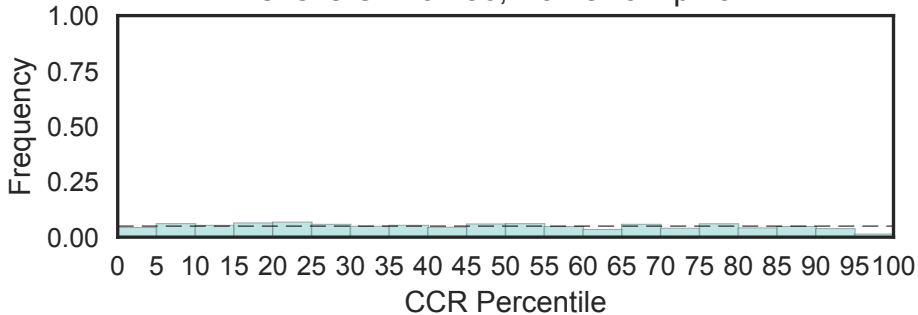



# Testis-specific protein 35 (Tsc35, N=1)

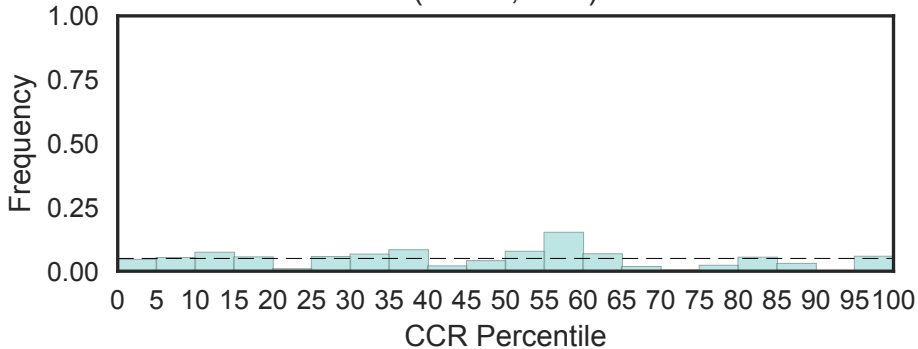

Twisted gastrulation (Tsg) protein conserved region  
(Tsg, N=1)

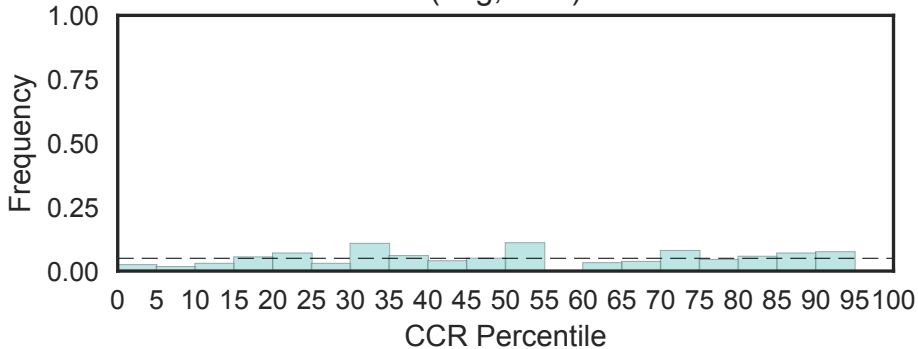

TspO/MBR family  
(TspO\_MBR, N=2)

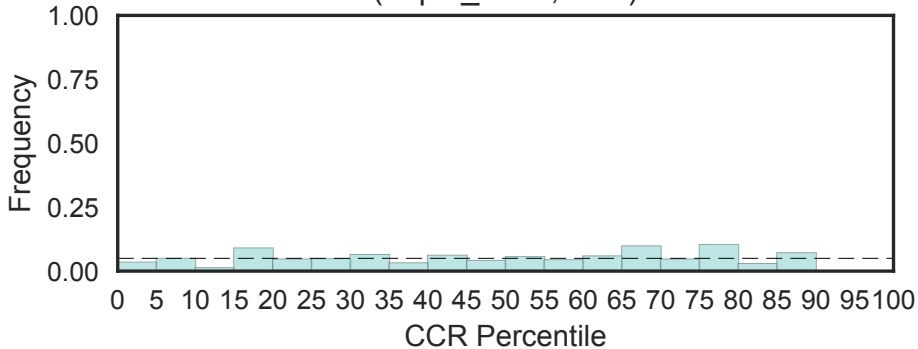

Tti2 family  
(Tti2, N=1)

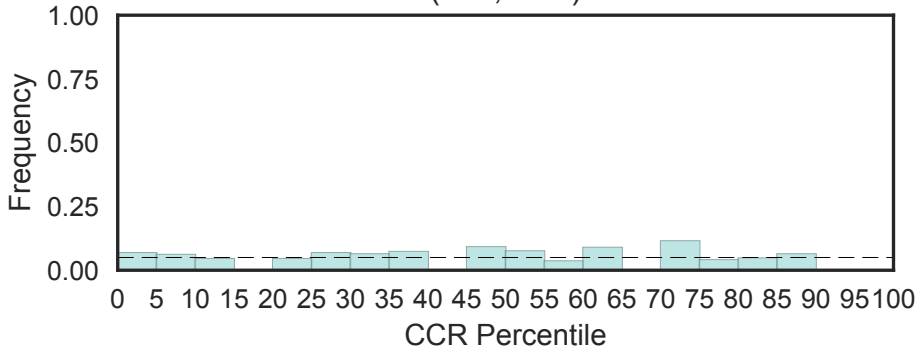

Tub family  
(Tub, N=5)

Fisher's OR: 0; Bonferroni p-val: 1

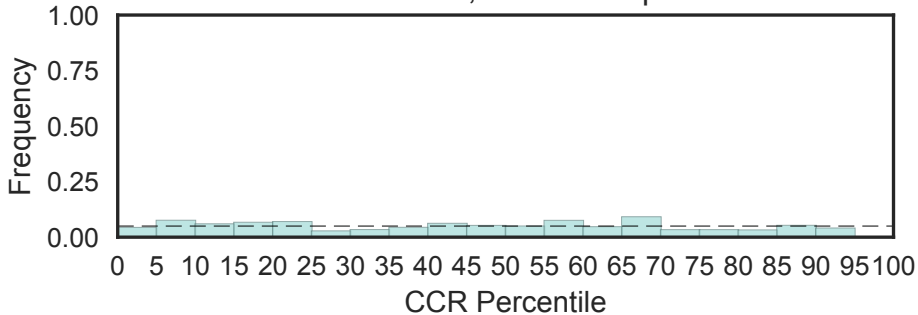

Tubby N-terminal  
(Tub\_N, N=3)

Fisher's OR: 0; Bonferroni p-val: 1

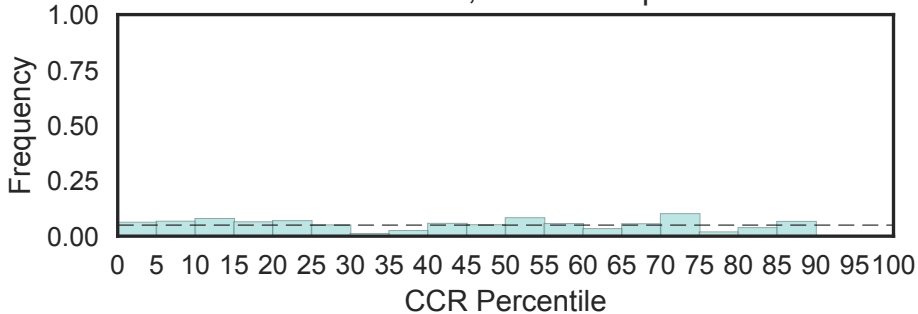

# Tuberin

(Tuberin, N=1)

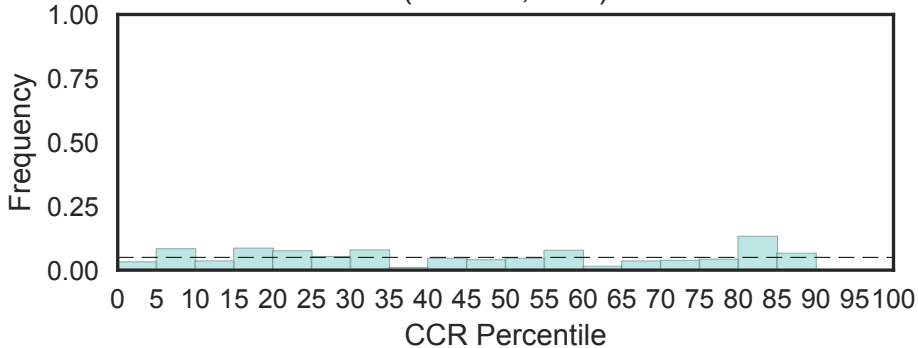

Tubulin/FtsZ family, GTPase domain  
(Tubulin, N=25)

Fisher's OR: 2.65; Bonferroni p-val: 1

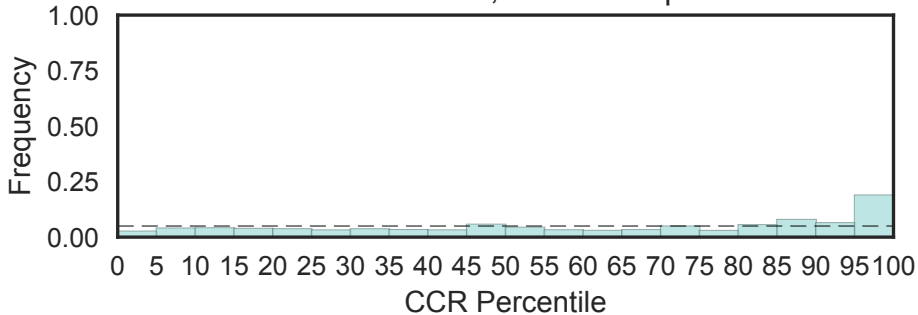



Tau and MAP protein, tubulin-binding repeat  
(Tubulin-binding, N=10)

Fisher's OR: 1.64; Bonferroni p-val: 1

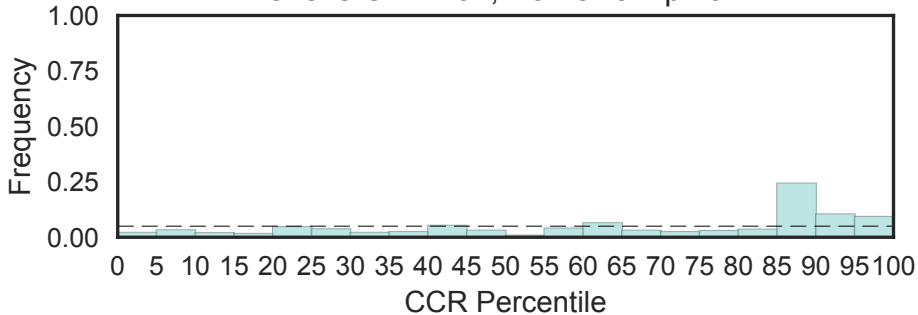

Tubulin C-terminal domain  
(Tubulin\_C, N=21)

Fisher's OR: 1.31; Bonferroni p-val: 1

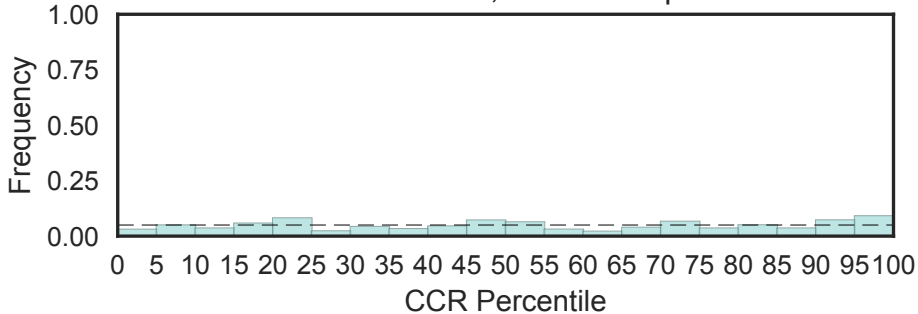

RNA binding activity-knot of a chromodomain  
(Tudor-knot, N=5)

Fisher's OR: 3.96; Bonferroni p-val: 1

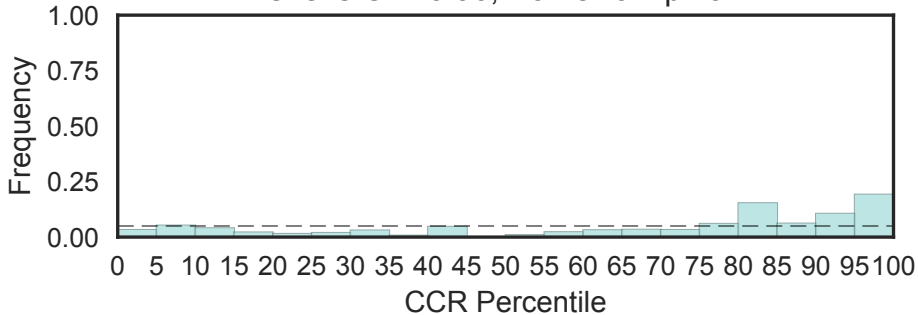

Tweety  
(Tweety, N=3)

Fisher's OR: 0.926; Bonferroni p-val: 1

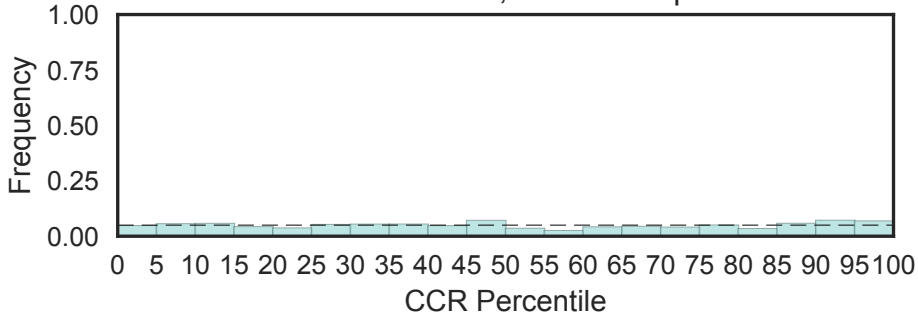

Tyrosyl-DNA phosphodiesterase  
(Tyr-DNA\_phospho, N=1)

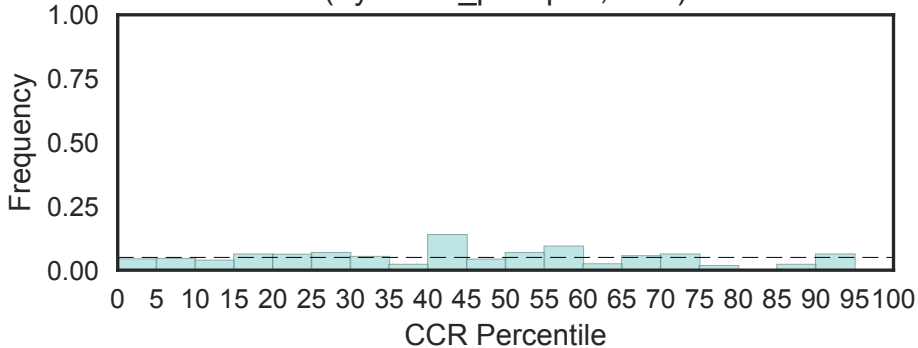

D-Tyr-tRNA(Tyr) deacylase  
(Tyr\_Deacylase, N=3)

Fisher's OR: 0; Bonferroni p-val: 1

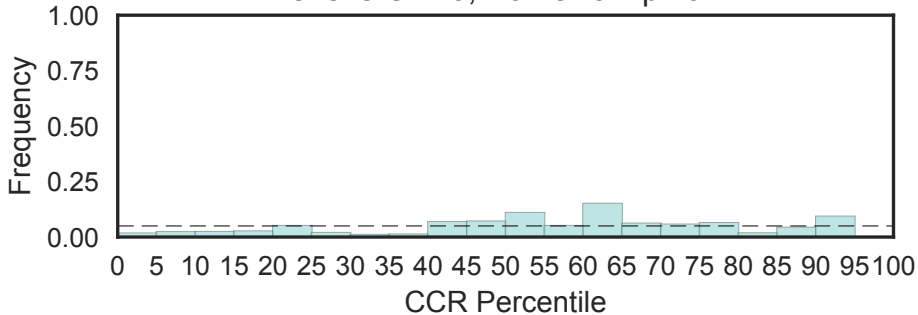

Common central domain of tyrosinase  
(Tyrosinase, N=3)

Fisher's OR: 0; Bonferroni p-val: 1

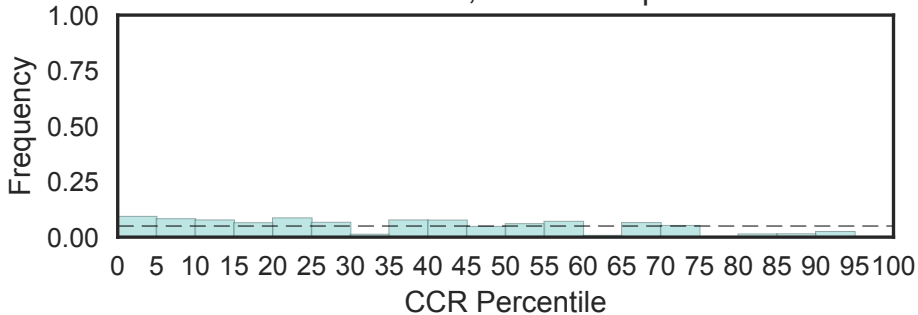

U-box domain  
(U-box, N=8)

Fisher's OR: 1.82; Bonferroni p-val: 1

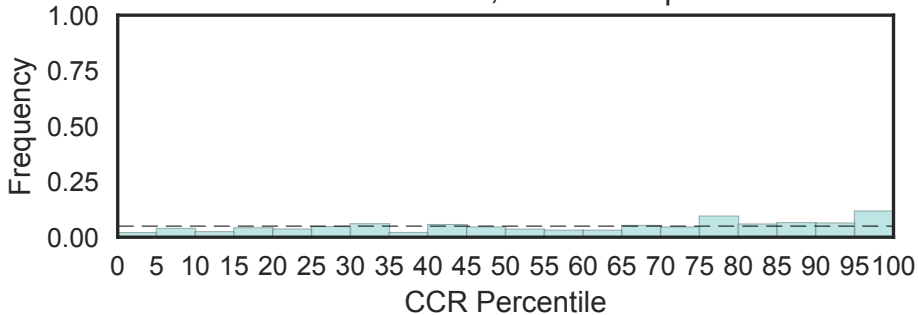



U1 small nuclear ribonucleoprotein of 70kDa MW N terminal  
(U1snRNP70\_N, N=1)

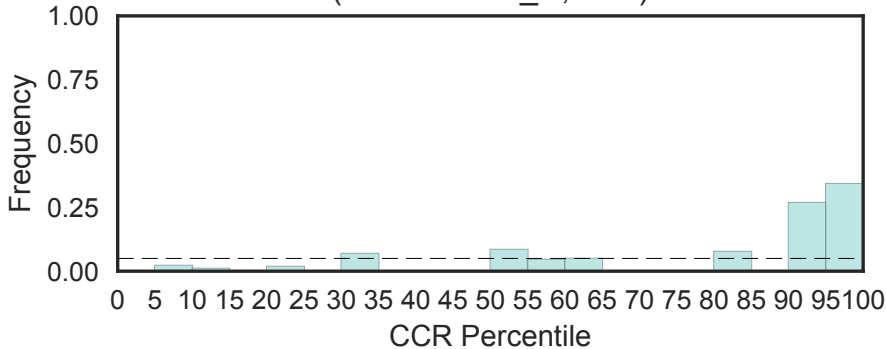

U3 small nucleolar RNA-associated protein 6  
(U3\_assoc\_6, N=1)

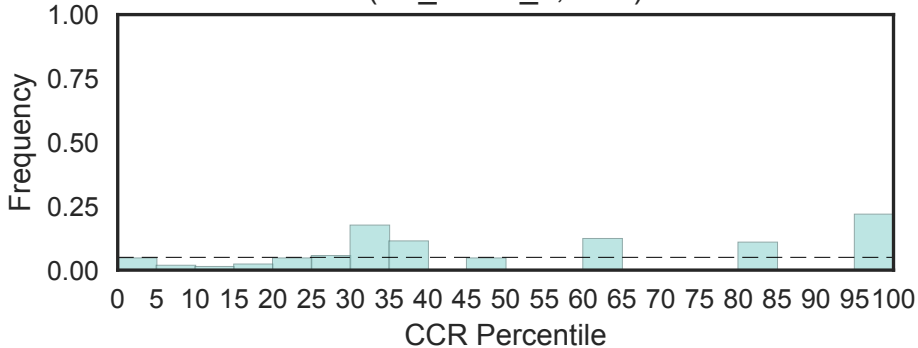

U3 small nucleolar RNA-associated protein 10  
(U3snoRNP10, N=1)

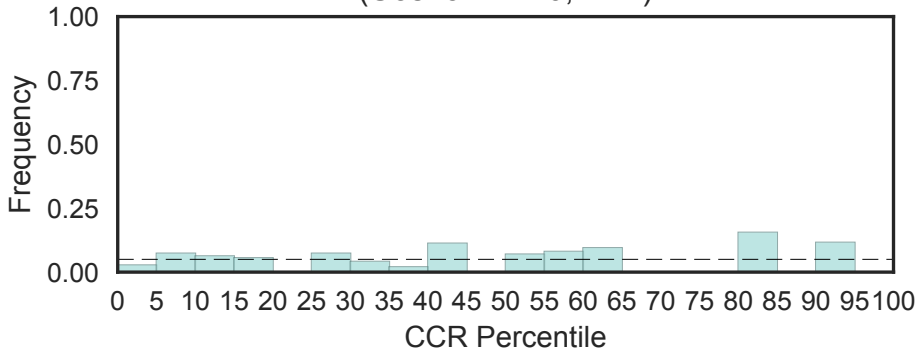

U5-snRNA binding site 2 of PrP8  
(U5\_2-snRNA\_bdg, N=1)

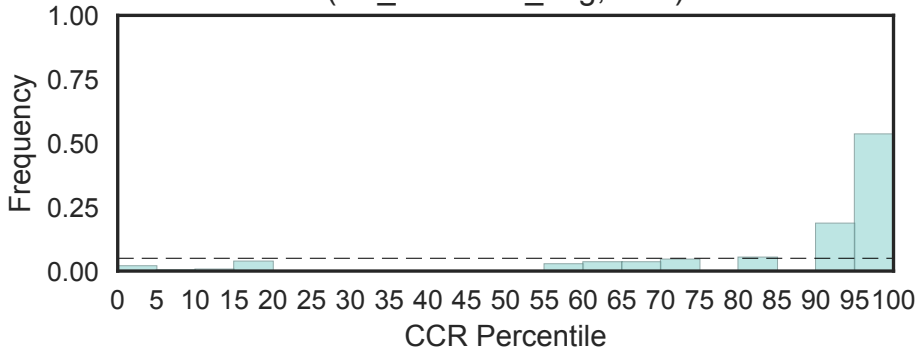

U6-snRNA interacting domain of PrP8  
(U6-snRNA\_bdg, N=1)

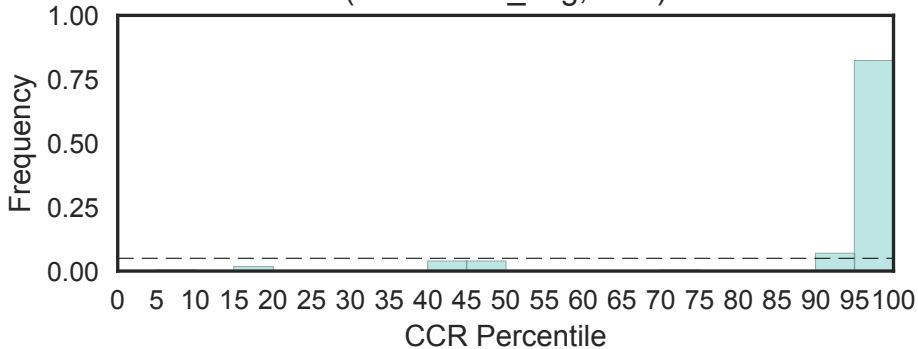

UAA transporter family  
(UAA, N=7)

Fisher's OR: 0.332; Bonferroni p-val: 1

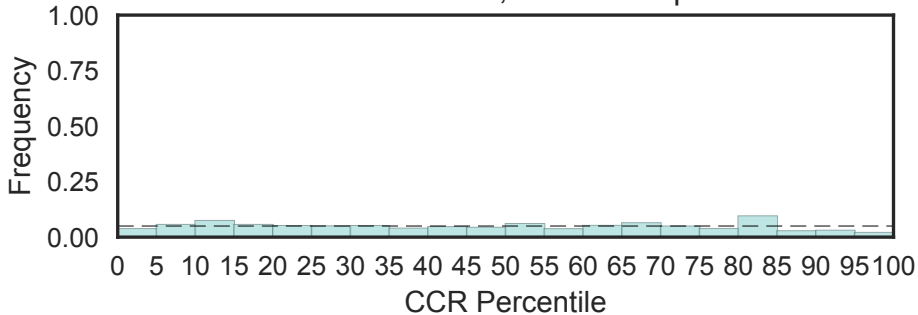

Ubiquitin/SUMO-activating enzyme ubiquitin-like domain  
(UAE\_UbL, N=1)

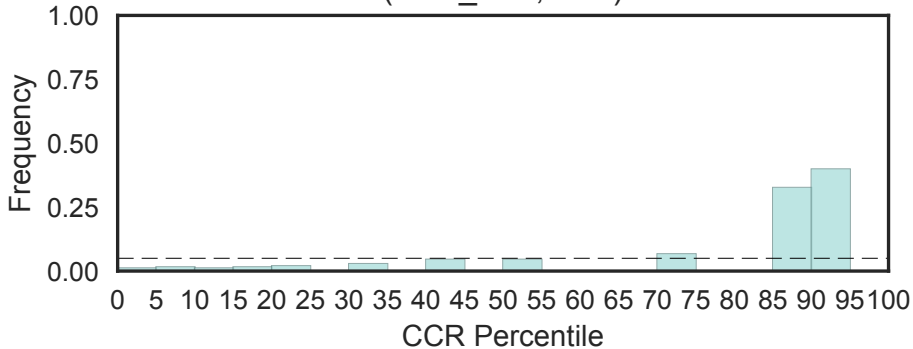

UBA/TS-N domain  
(UBA, N=30)

Fisher's OR: 2.61; Bonferroni p-val: 1

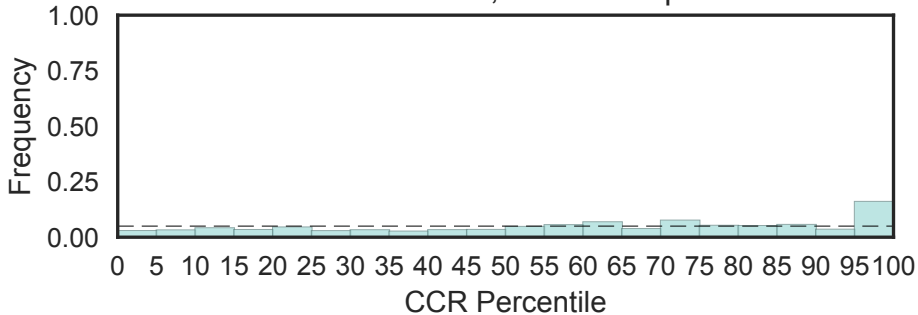



SUMO-activating enzyme subunit 2 C-terminus  
(UBA2\_C, N=1)

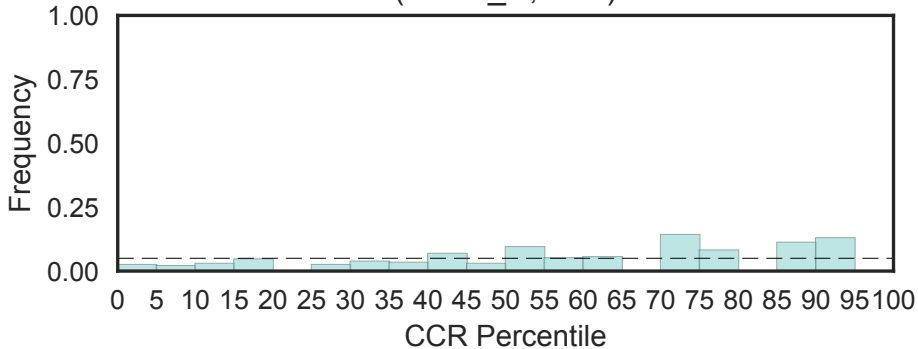

UBA-like domain  
(UBA\_4, N=13)

Fisher's OR: 6.64; Bonferroni p-val: 0.835

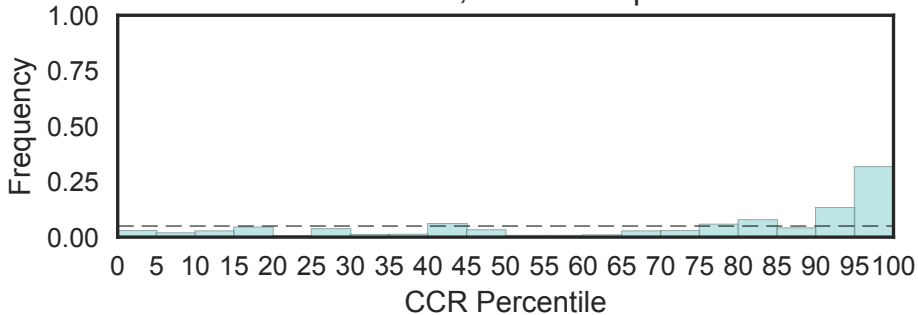

UBA domain  
(UBA\_5, N=1)

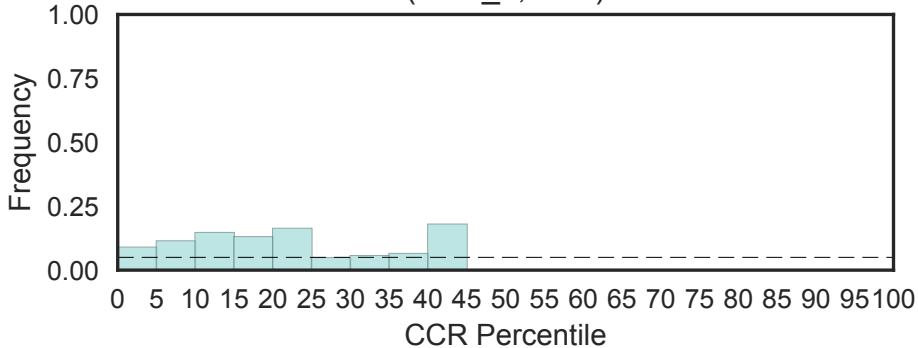

Ubiquitin-activating enzyme active site  
(UBA\_e1\_thiolCys, N=2)

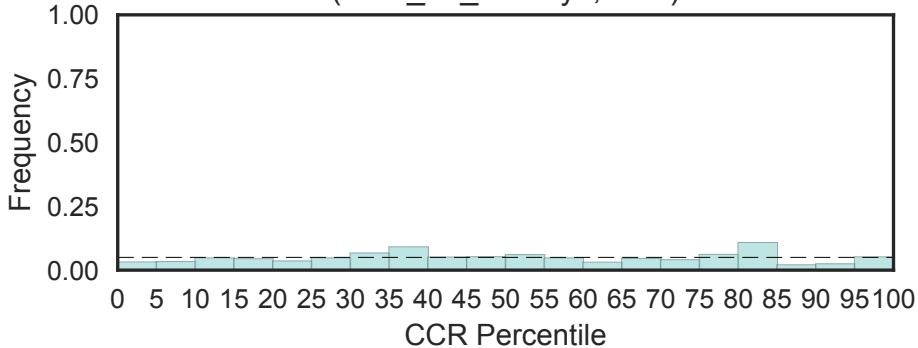

# Ubiquitin-binding domain (UBD, N=2)

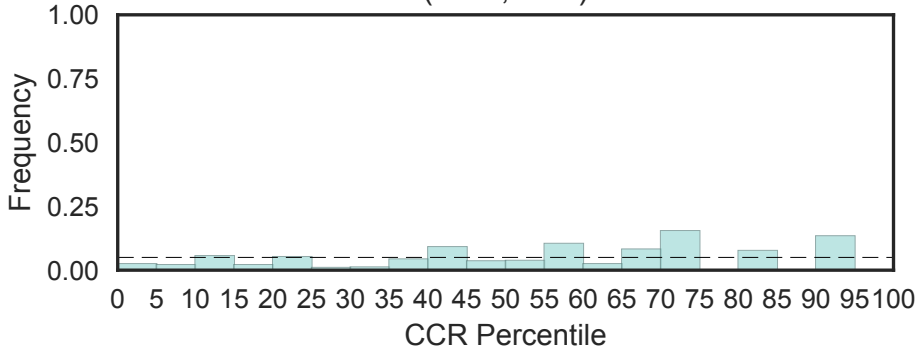

# Ubinuclein conserved middle domain (UBN\_AB, N=2)

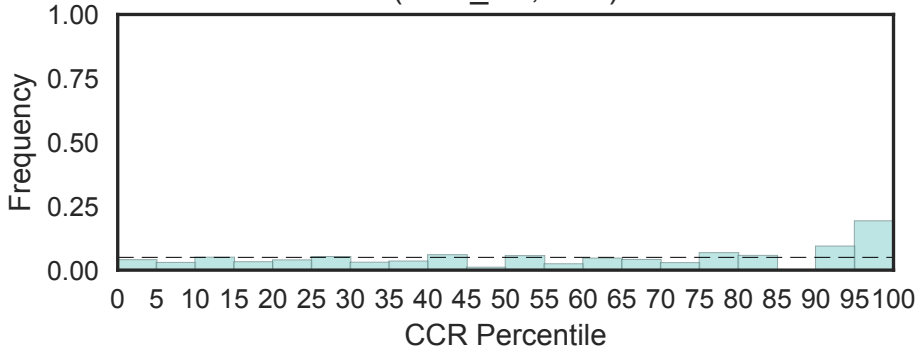

UBX domain  
(UBX, N=12)

Fisher's OR: 1.62; Bonferroni p-val: 1

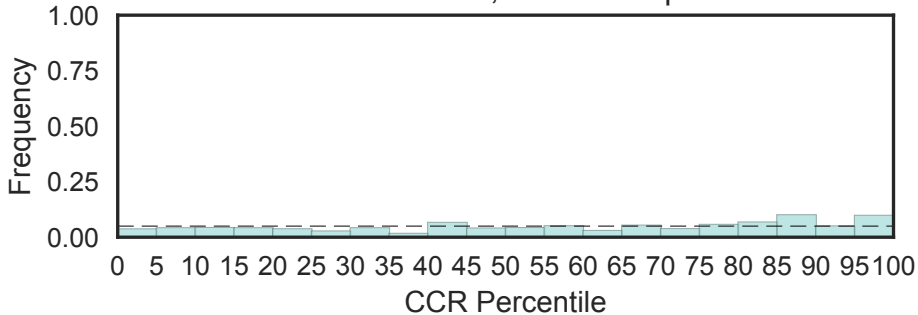

Ubiquitin-binding zinc-finger  
(UBZ\_FAAP20, N=2)

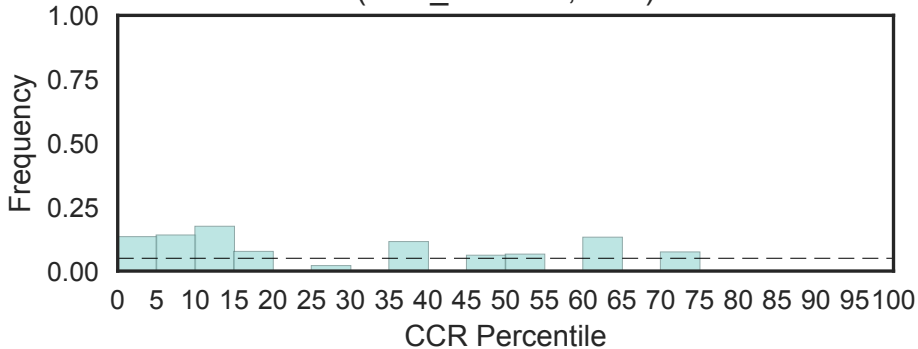



Ubiquitin carboxyl-terminal hydrolase  
(UCH, N=69)

Fisher's OR: 1.71; Bonferroni p-val: 0.0111

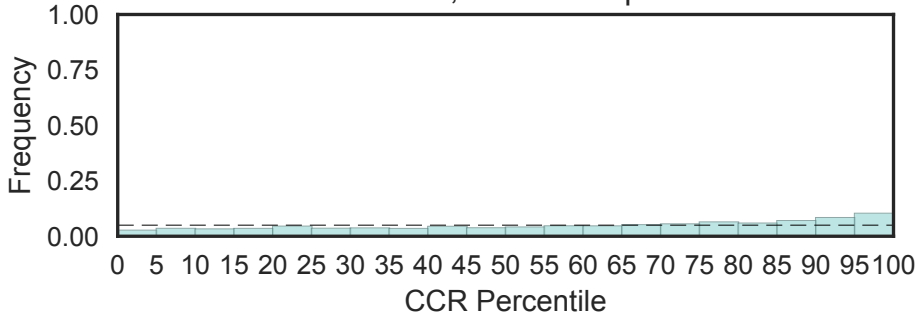

Ubiquitin carboxyl-terminal hydrolase  
(UCH\_1, N=71)

Fisher's OR: 1.84; Bonferroni p-val: 0.0184

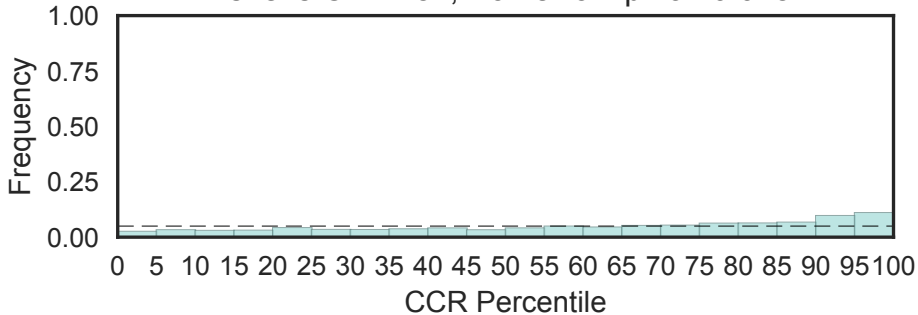

N-terminal of ubiquitin carboxyl-terminal hydrolase 37  
(UCH\_N, N=2)

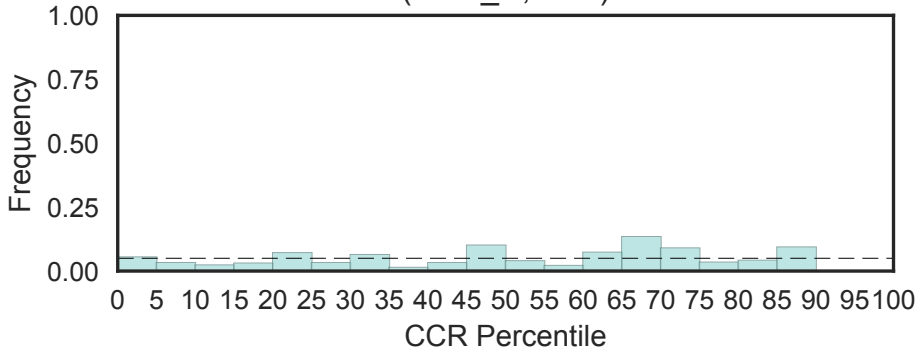

# Unique cartilage matrix associated protein (UCMA, N=1)

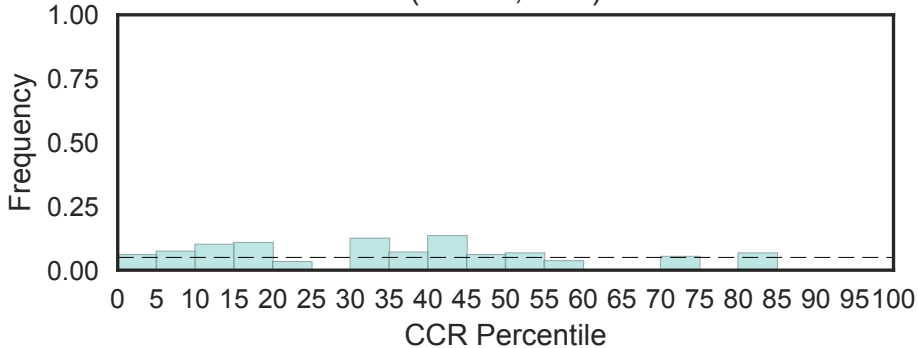

Ubiquinol-cytochrome C reductase complex 14kD subunit  
(UCR\_14kD, N=1)

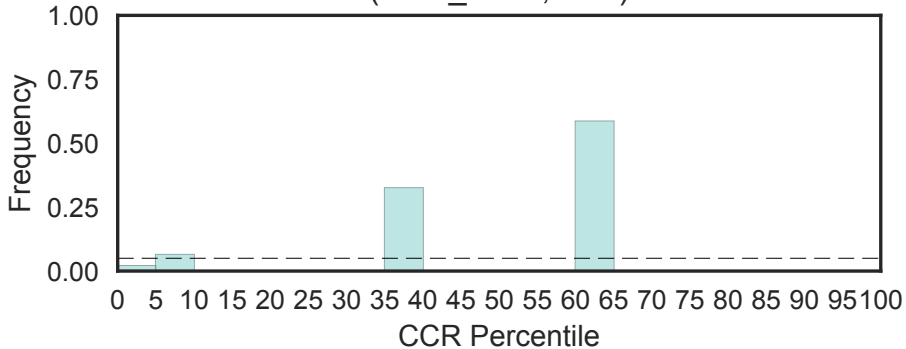

Ubiquinol-cytochrome C reductase complex, 6.4kD protein  
(UCR\_6-4kD, N=1)

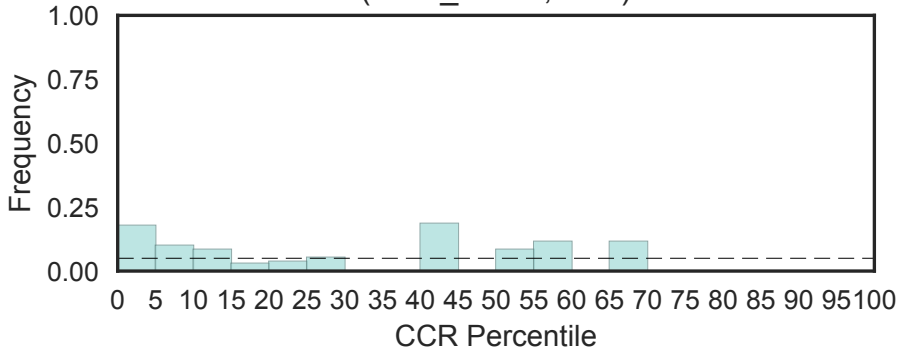

Ubiquinol-cytochrome C reductase, UQCRX/QCR9 like  
(UCR\_UQCRX\_QCR9, N=1)

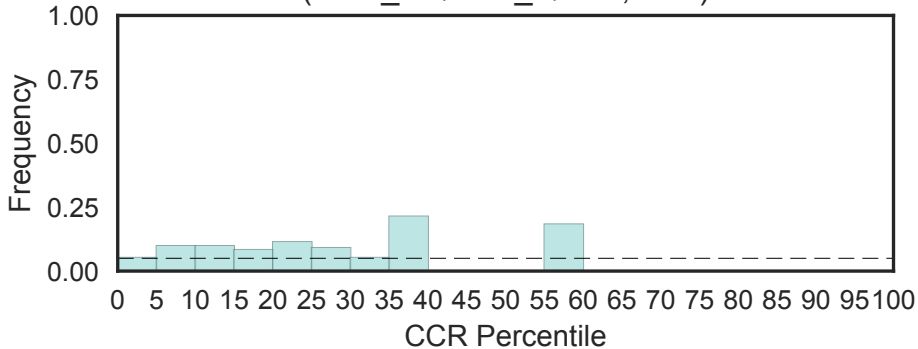

Ubiquinol-cytochrome C reductase hinge protein  
(UCR\_hinge, N=1)

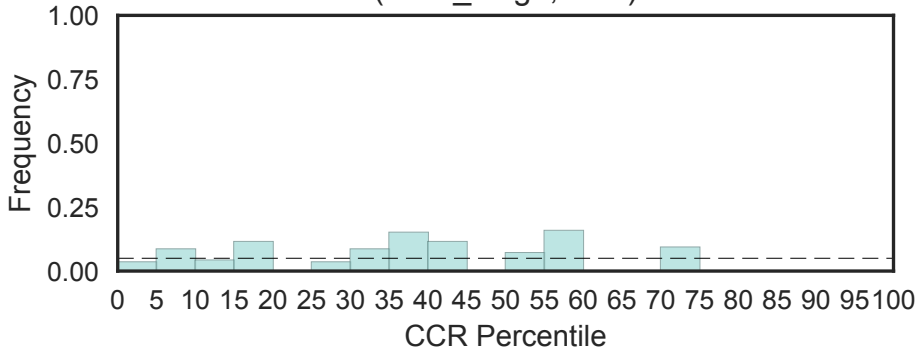



# Uracil DNA glycosylase superfamily (UDG, N=2)

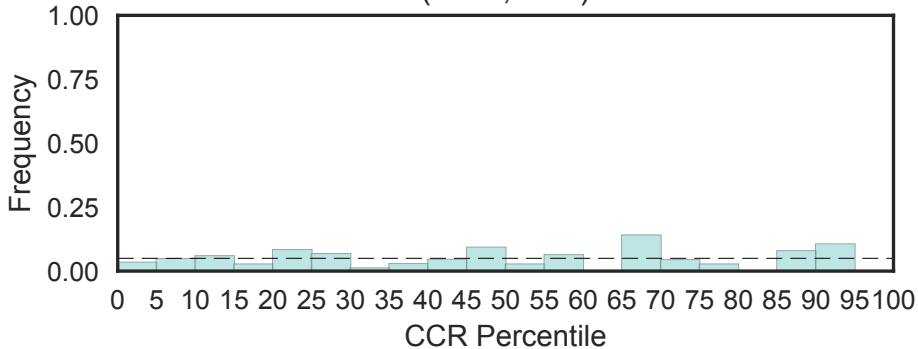

UDP-glucose:Glycoprotein Glucosyltransferase  
(UDP-g\_GGTase, N=2)

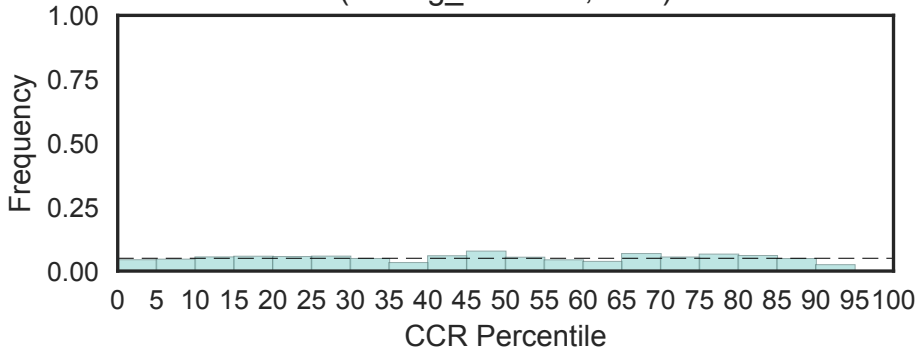

UTP--glucose-1-phosphate uridylyltransferase  
(UDPGP, N=3)

Fisher's OR: 0.237; Bonferroni p-val: 1

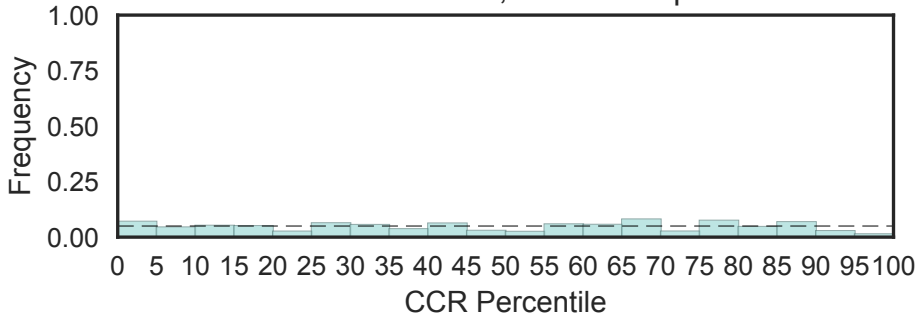

UDP-glucuronosyl and UDP-glucosyl transferase  
(UDPGT, N=22)

Fisher's OR: 0.0638; Bonferroni p-val: 1.65e-07

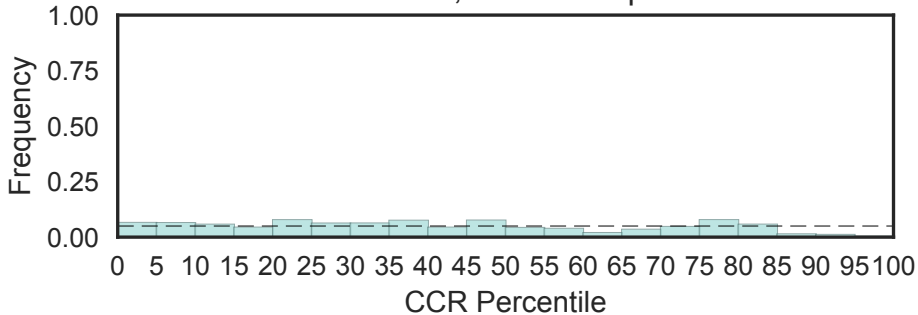

UDP-glucose/GDP-mannose dehydrogenase family, central domain  
(UDPG\_MGDP\_dh, N=1)

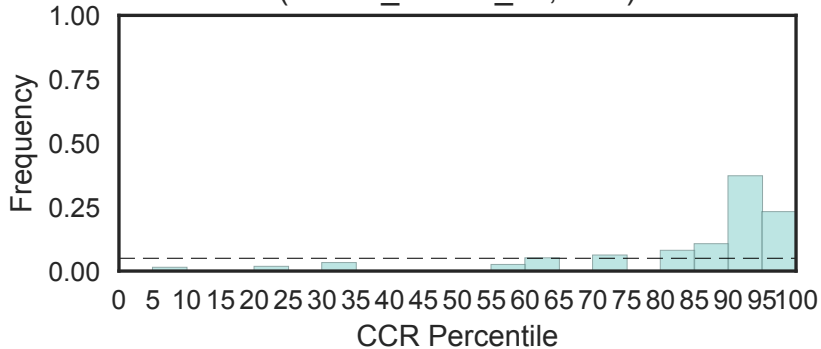

UDP-glucose/GDP-mannose dehydrogenase family, UDP binding domain  
(UDPG\_MGDP\_dh\_C, N=1)

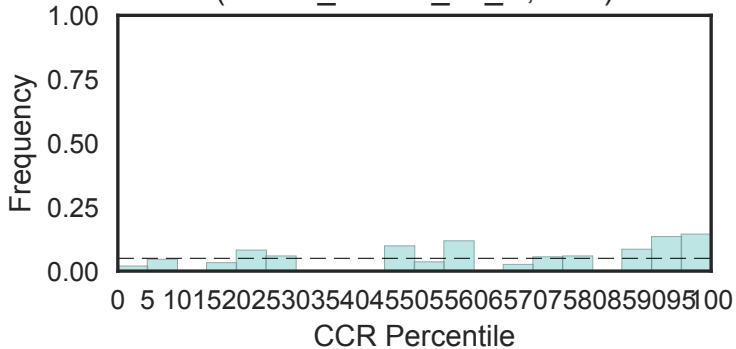

UDP-glucose/GDP-mannose dehydrogenase family, NAD binding domain  
(UDPG\_MGDP\_dh\_N, N=1)

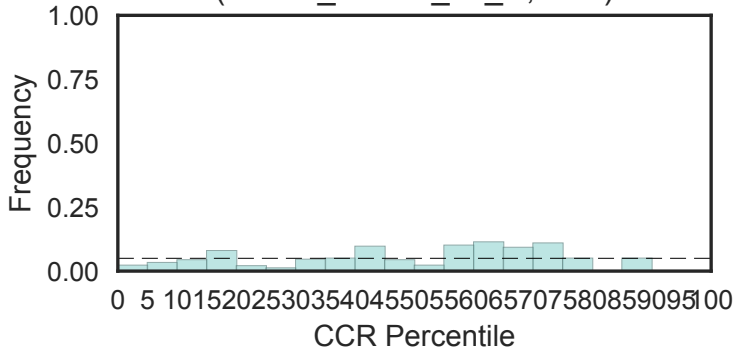

UEV domain  
(UEV, N=3)

Fisher's OR: 6.36; Bonferroni p-val: 1

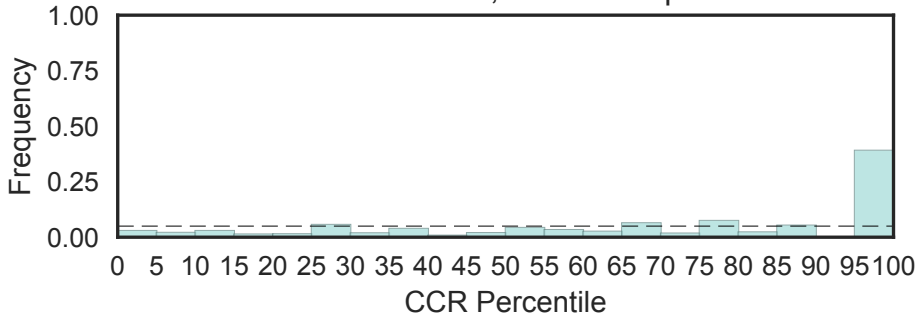



# Ubiquitin-fold modifier-conjugating enzyme 1 (UFC1, N=1)

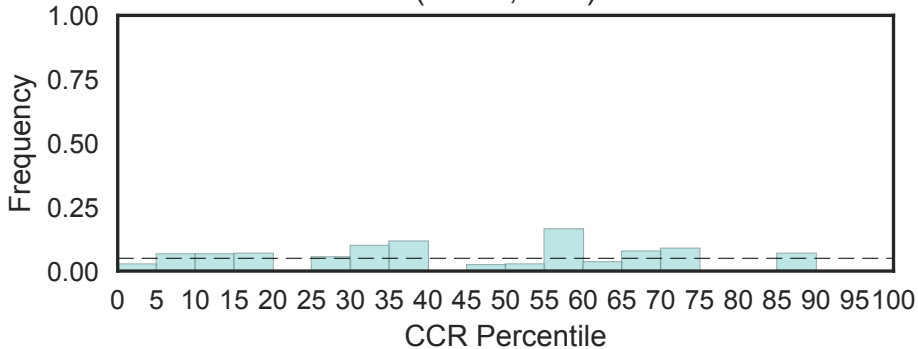

Ubiquitin fusion degradation protein UFD1  
(UFD1, N=1)

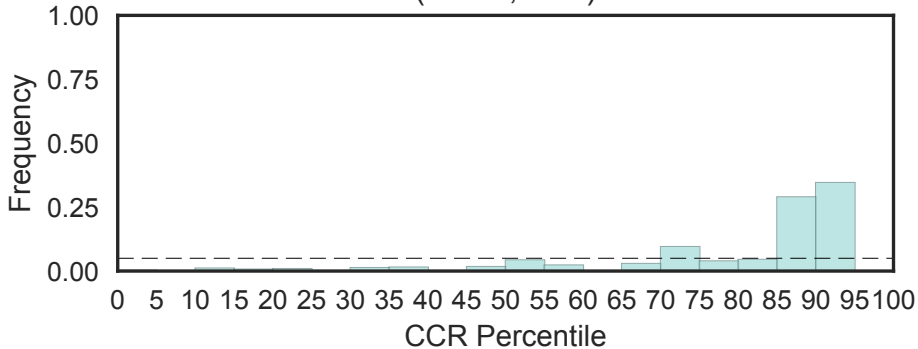

Ubiquitin interaction motif  
(UIM, N=37)

Fisher's OR: 3.65; Bonferroni p-val: 1

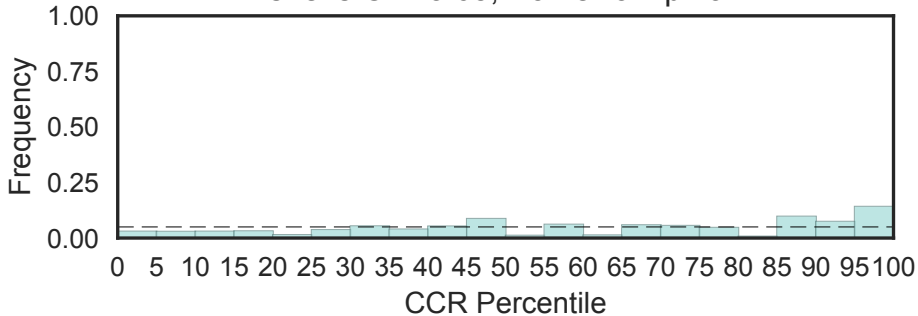

UL45 protein, carbohydrate-binding C-type lectin-like  
(UL45, N=3)

Fisher's OR: 0; Bonferroni p-val: 1

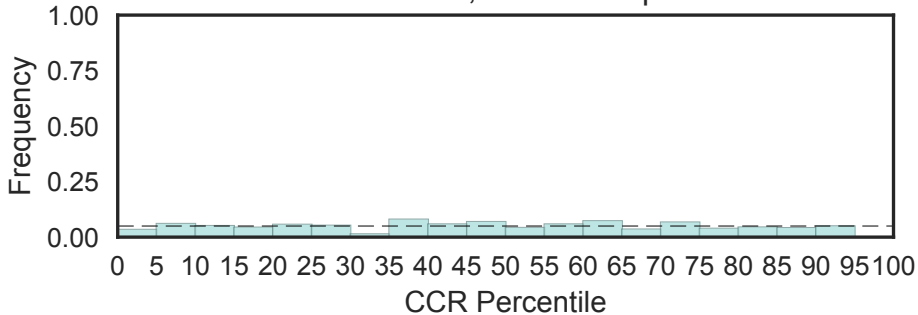

# Ubiquitin-like oligomerisation domain of SATB (ULD, N=2)

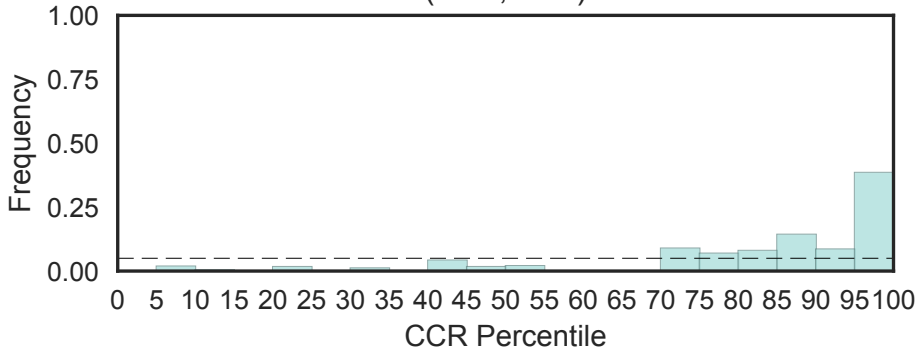

UME (NUC010) domain  
(UME, N=1)

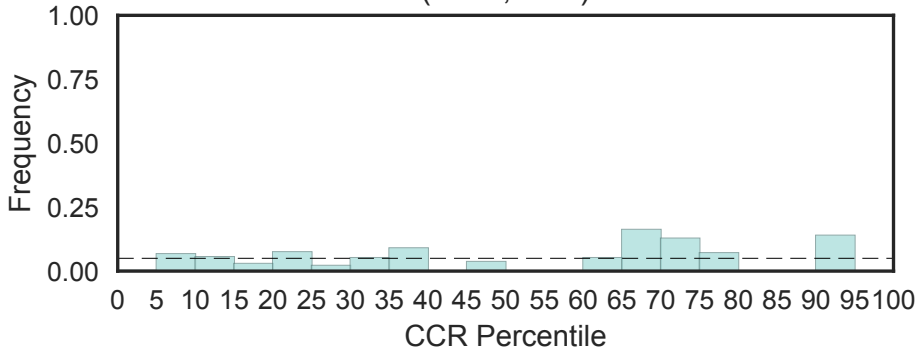

# Proteasome maturation factor UMP1 (UMP1, N=1)

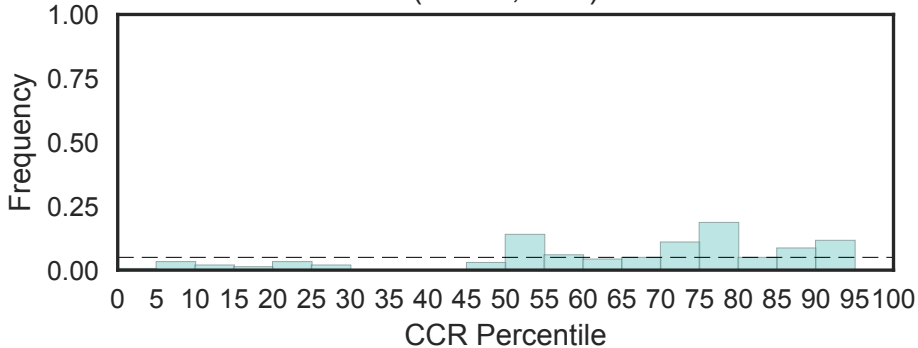

Pyrimidine 5'-nucleotidase (UMPH-1)  
(UMPH-1, N=3)

Fisher's OR: 0.449; Bonferroni p-val: 1

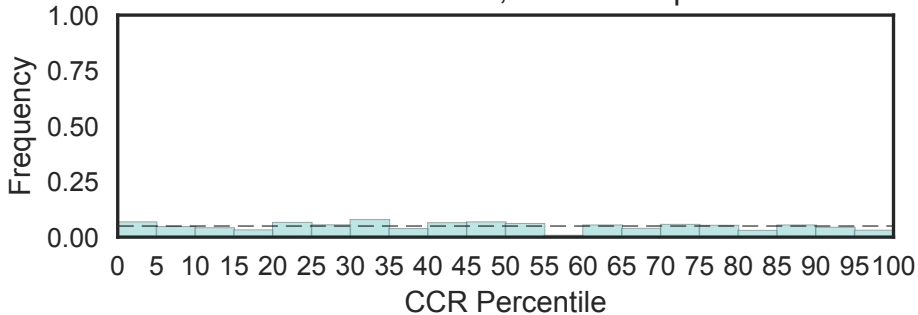



UNC-50 family  
(UNC-50, N=1)

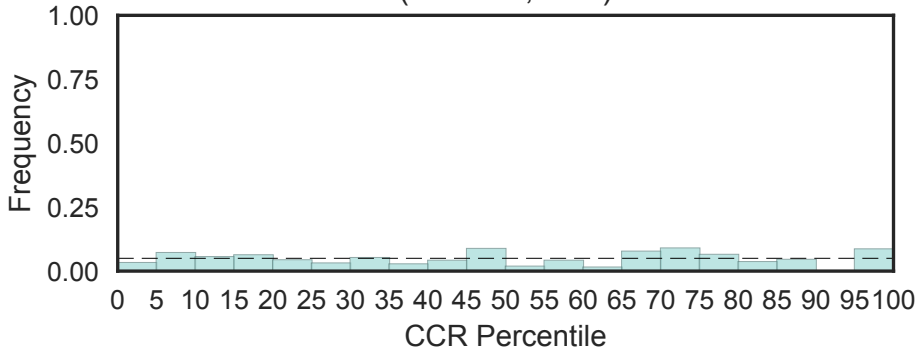

Cation-channel complex subunit UNC-79  
(UNC-79, N=1)

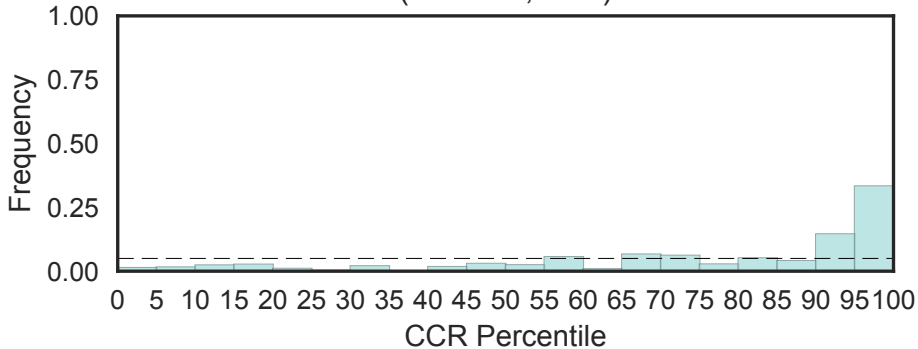

Ion channel regulatory protein UNC-93  
(UNC-93, N=3)

Fisher's OR: 0; Bonferroni p-val: 1

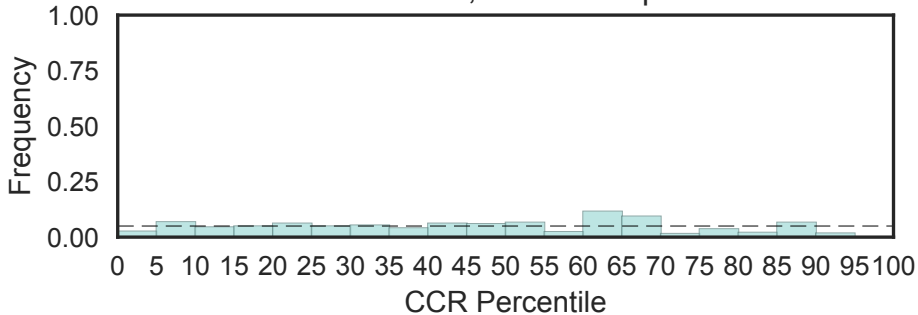

UNC119-binding protein C5orf30 homologue  
(UNC119\_bdg, N=1)

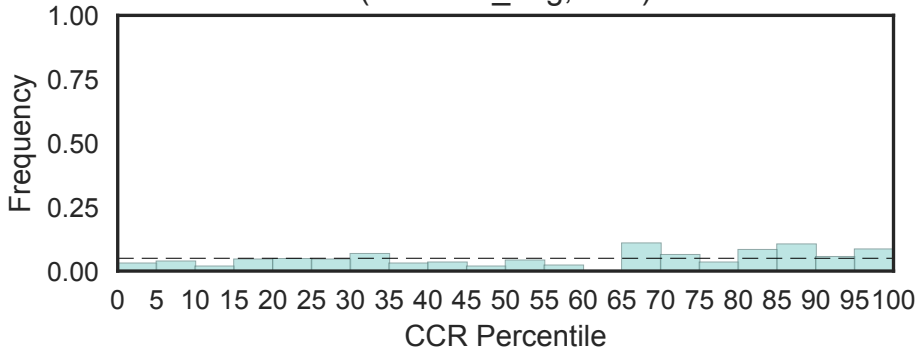

Myosin-binding striated muscle assembly central  
(UNC45-central, N=2)

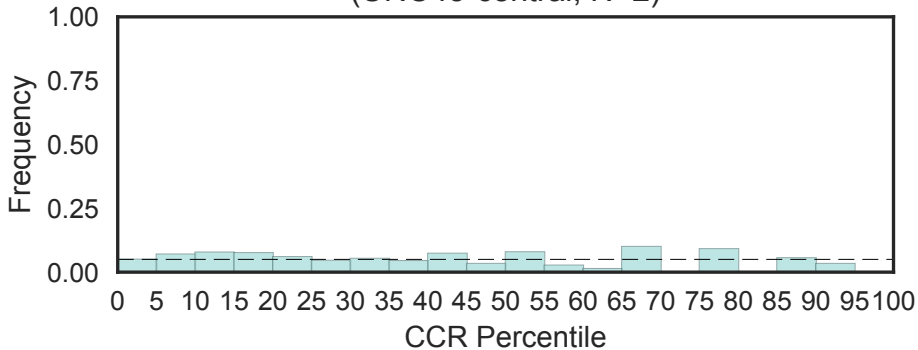

Cation channel complex component UNC80  
(UNC80, N=1)

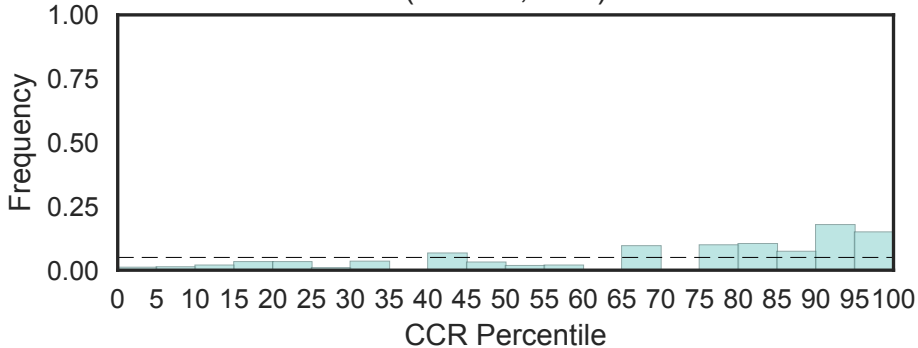

Nuclear pore localisation protein NPL4  
(UN\_NPL4, N=1)

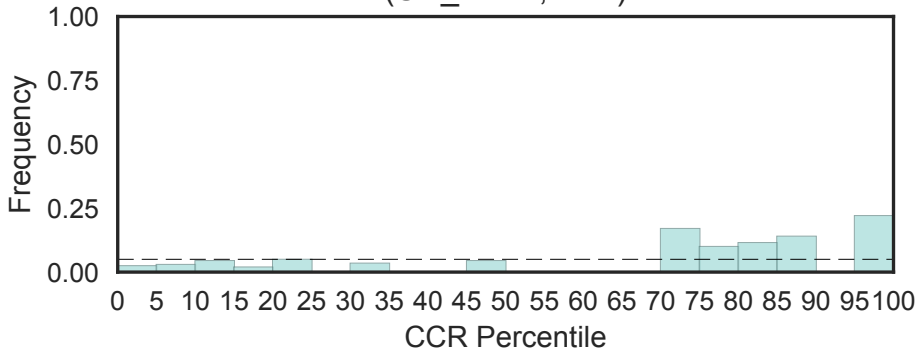

UPA domain  
(UPA, N=5)

Fisher's OR: 0.468; Bonferroni p-val: 1

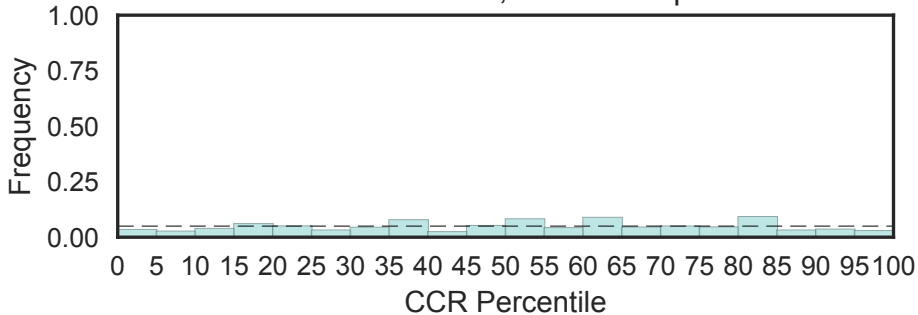



u-PAR/Ly-6 domain  
(UPAR\_LY6, N=28)

Fisher's OR: 0.152; Bonferroni p-val: 1

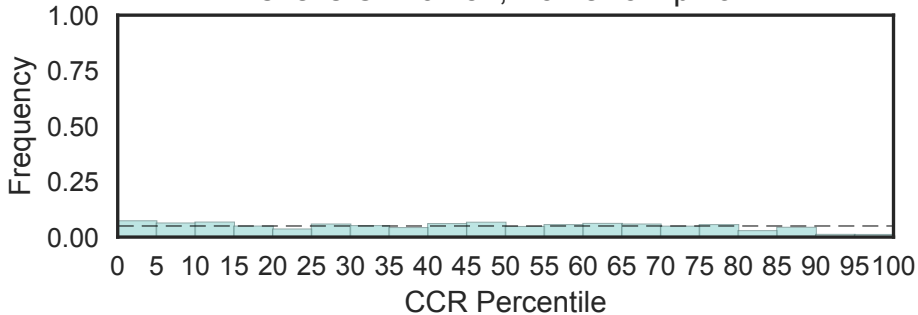

Ly6/PLAUR domain-containing protein 6, Lypd6  
(UPAR\_LY6\_2, N=2)

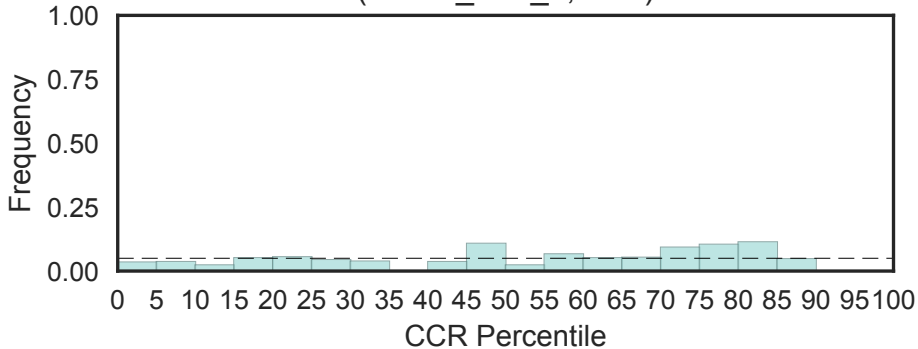

Uncharacterized protein family UPF0004  
(UPF0004, N=2)

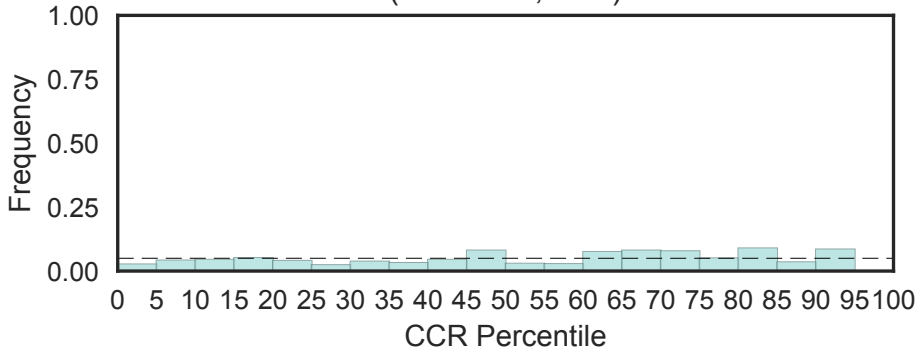

Uncharacterized protein family UPF0016  
(UPF0016, N=2)

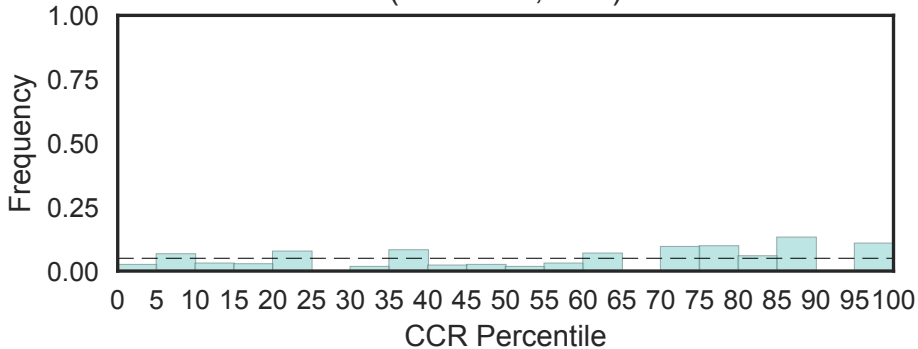

Putative RNA methylase family UPF0020  
(UPF0020, N=5)

Fisher's OR: 0; Bonferroni p-val: 1

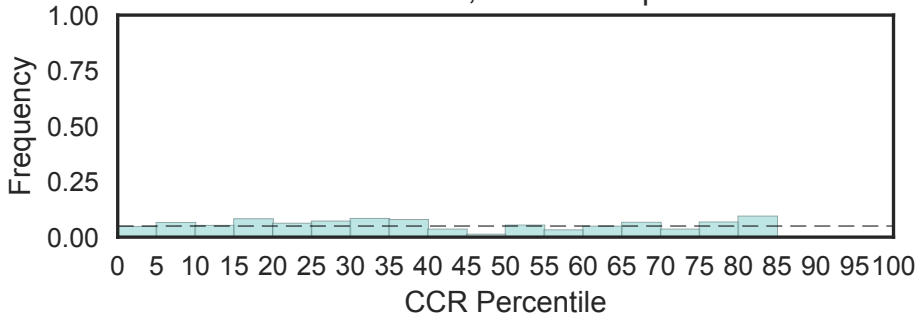

Uncharacterized protein family UPF0029  
(UPF0029, N=1)

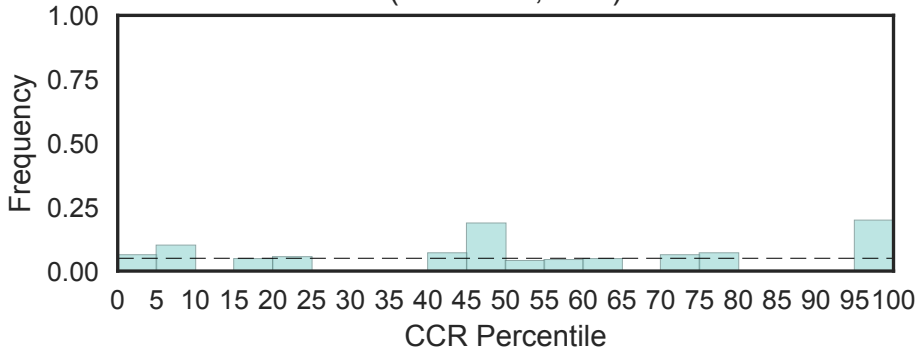

Uncharacterized protein family UPF0054  
(UPF0054, N=2)

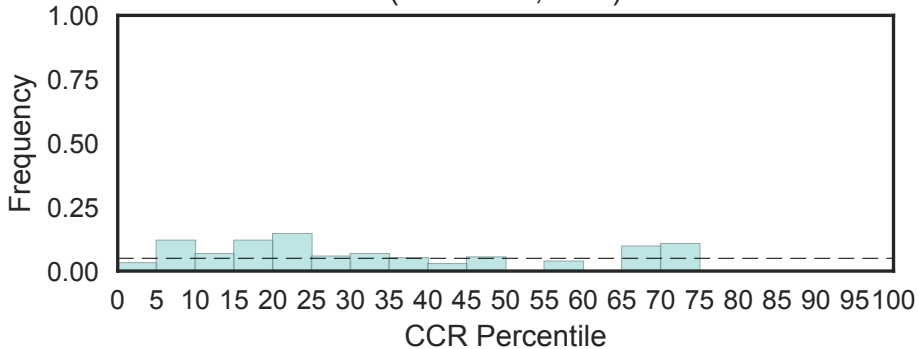

Uncharacterized ACR, YdiU/UPF0061 family  
(UPF0061, N=1)

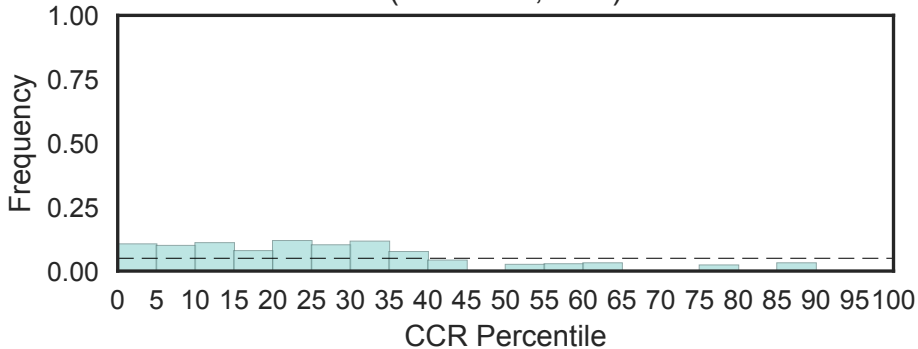



Uncharacterised protein family UPF0066  
(UPF0066, N=1)

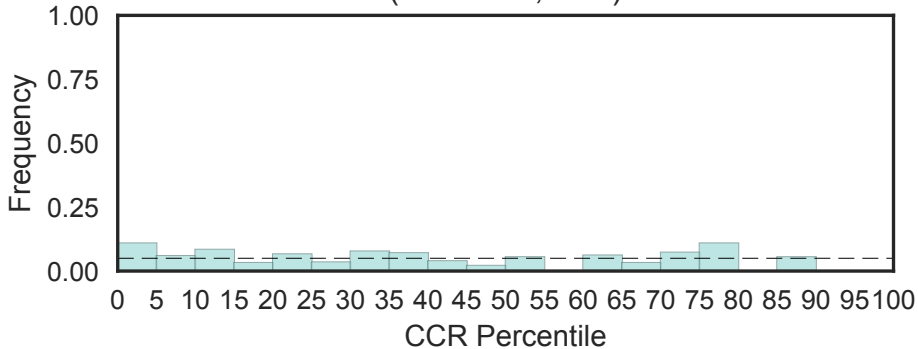

Domain of unknown function UPF0086  
(UPF0086, N=1)

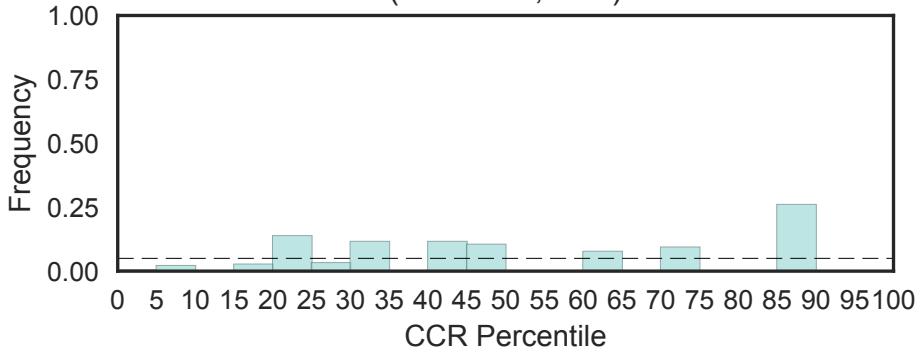

Uncharacterised protein family (UPF0113)  
(UPF0113, N=1)

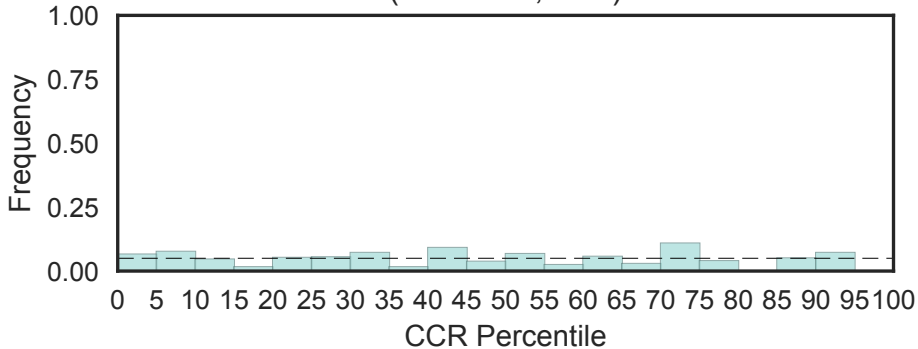

Uncharacterised protein family (UPF0121)  
(UPF0121, N=1)

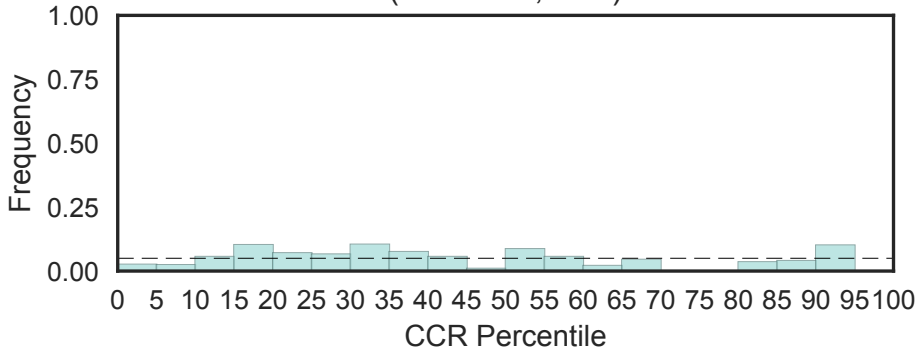

Uncharacterised protein family (UPF0139)  
(UPF0139, N=2)

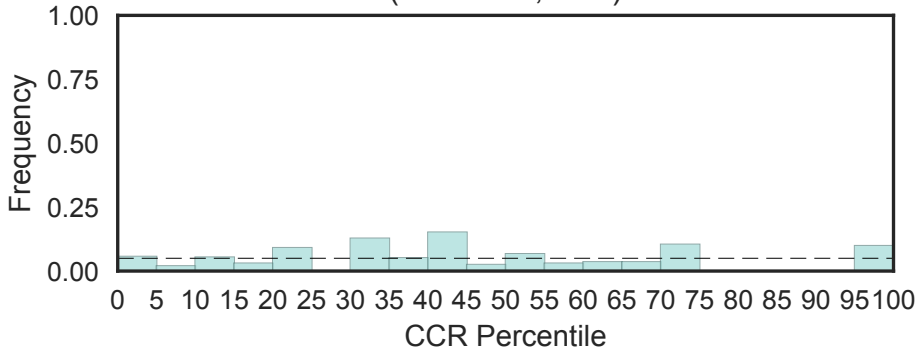

Uncharacterised protein family (UPF0160)  
(UPF0160, N=1)

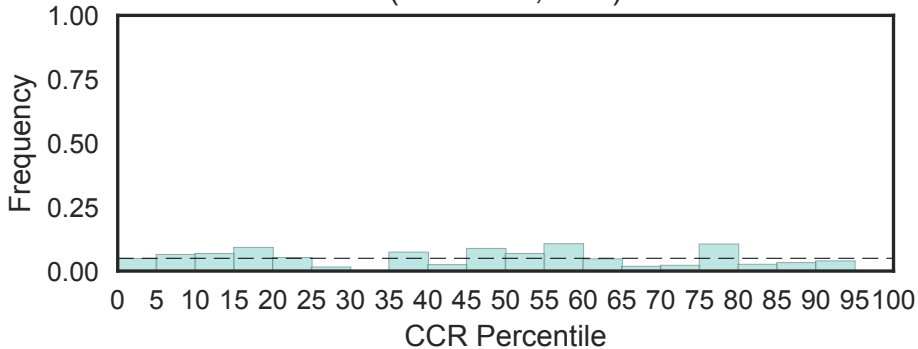

Uncharacterised protein family (UPF0172)  
(UPF0172, N=2)

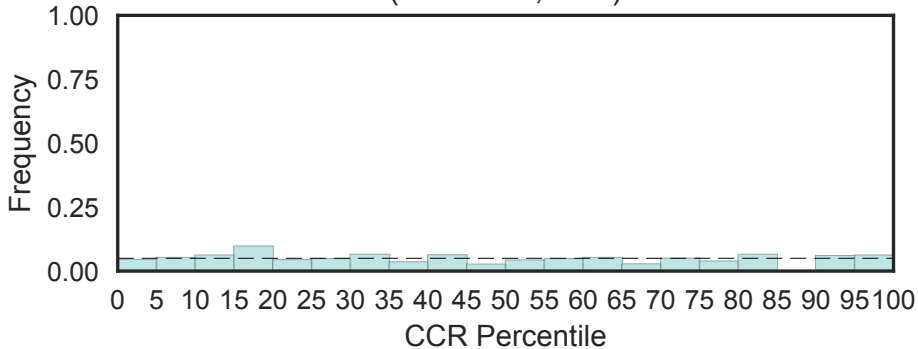

Uncharacterised protein family (UPF0183)  
(UPF0183, N=1)

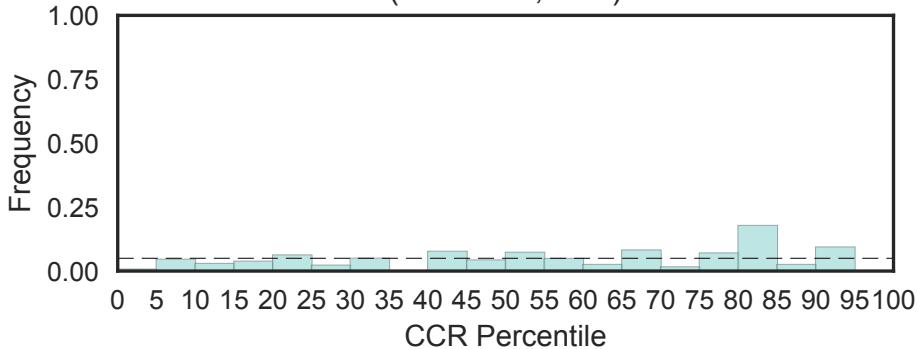



Uncharacterised protein family (UPF0184)  
(UPF0184, N=1)

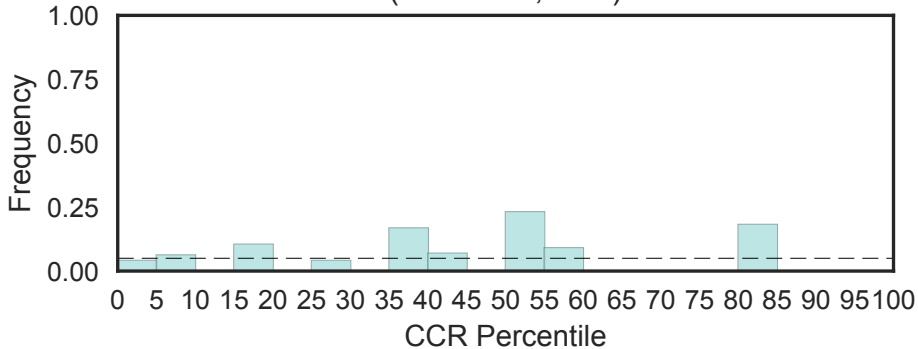

Uncharacterised protein family (UPF0193)  
(UPF0193, N=1)

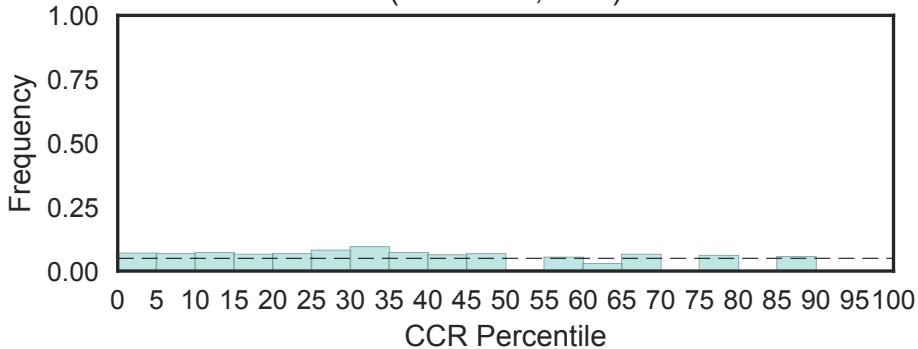

Uncharacterised protein family (UPF0203)  
(UPF0203, N=1)

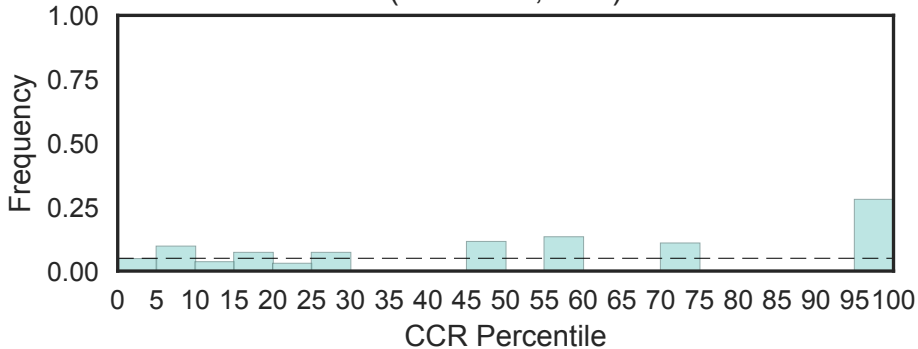

Uncharacterised protein family (UPF0220)  
(UPF0220, N=1)

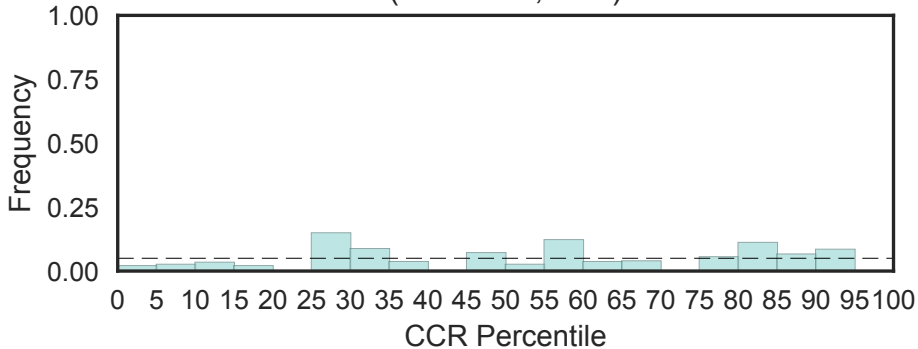

Uncharacterised protein family (UPF0239)  
(UPF0239, N=1)

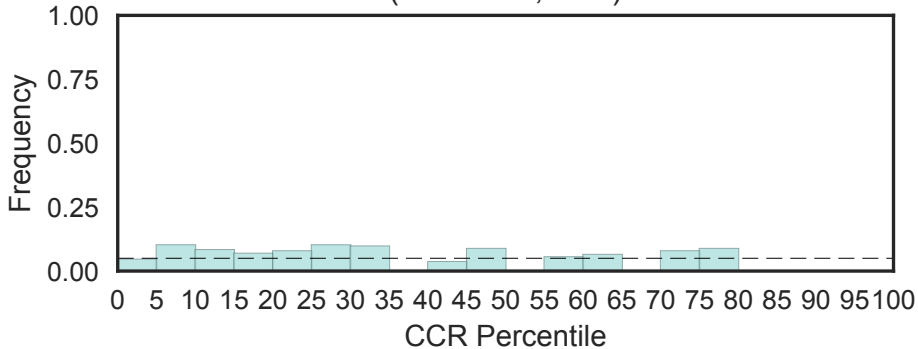

Uncharacterised protein family (UPF0240)  
(UPF0240, N=1)

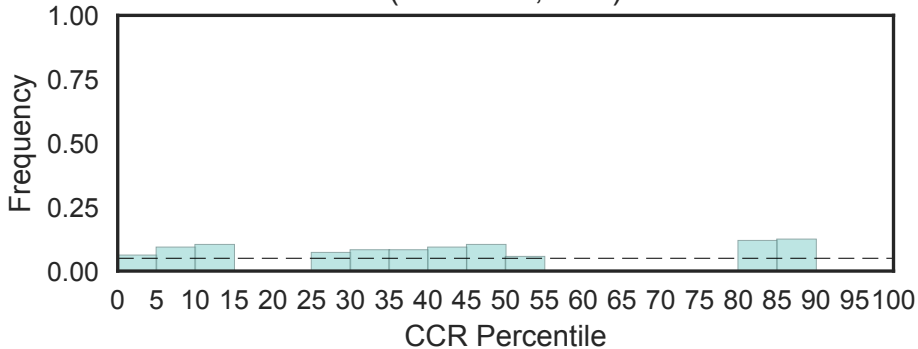

Uncharacterised protein family (UPF0258)  
(UPF0258, N=2)

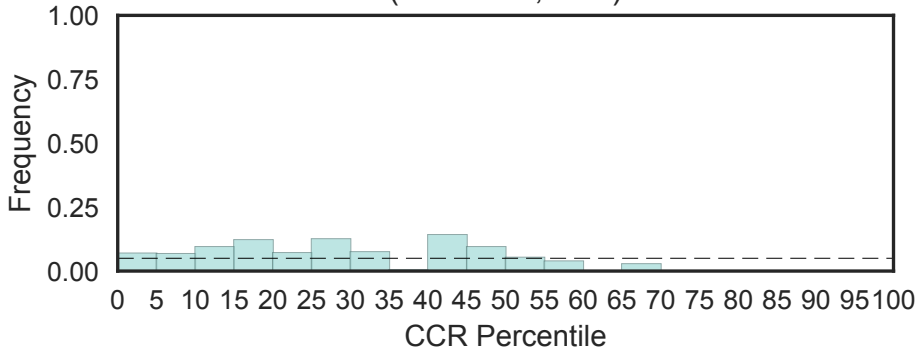

Transmembrane protein C12orf23, UPF0444  
(UPF0444, N=1)

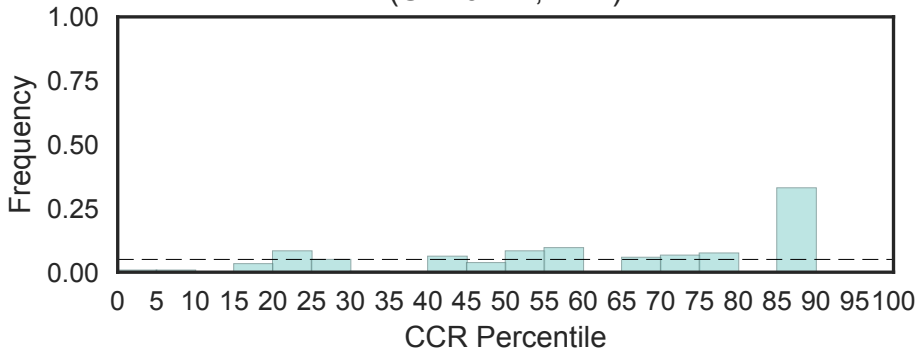



Uncharacterised protein family UPF0449  
(UPF0449, N=1)

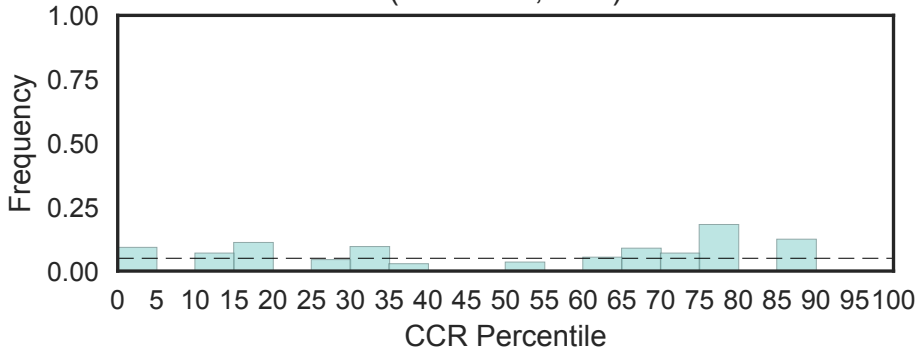

UPF0489 domain  
(UPF0489, N=1)

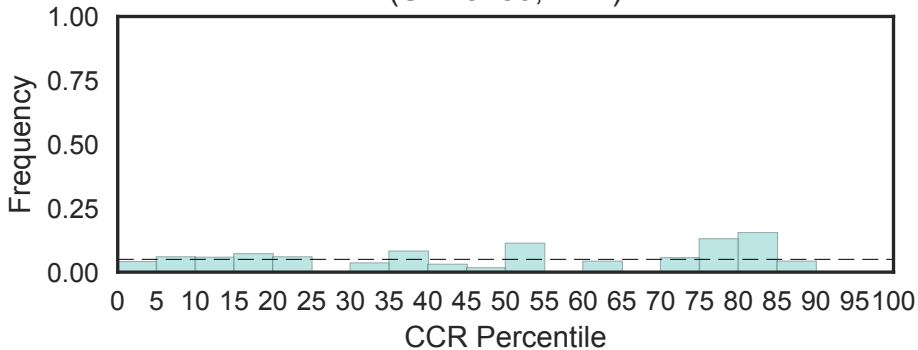

Uncharacterized protein family UPF0492  
(UPF0492, N=1)

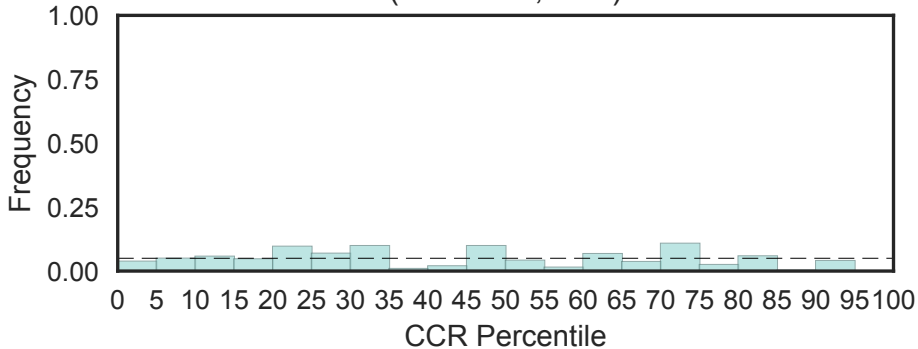

Uncharacterised protein UPF0515  
(UPF0515, N=2)

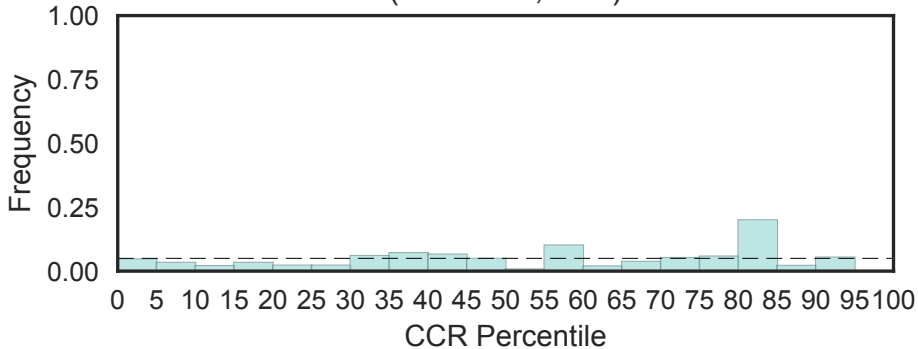

UPF0524 of C3orf70  
(UPF0524, N=1)

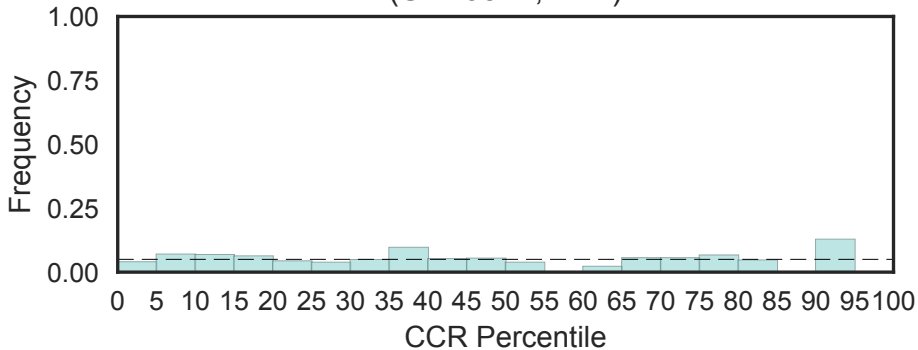

Uncharacterised protein family UPF0547  
(UPF0547, N=1)

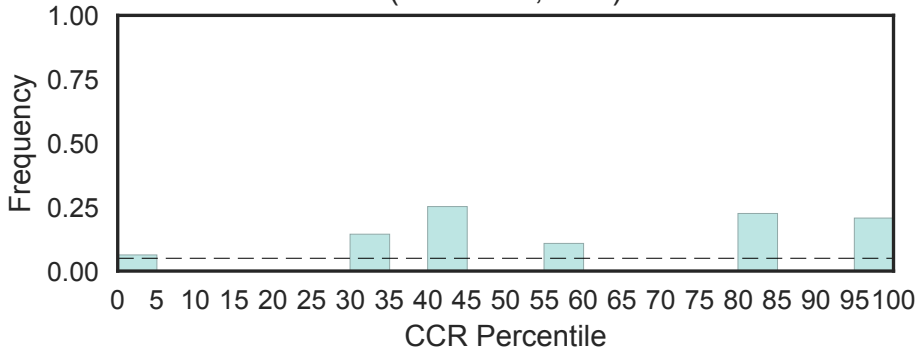

Uncharacterised protein family UPF0552  
(UPF0552, N=2)

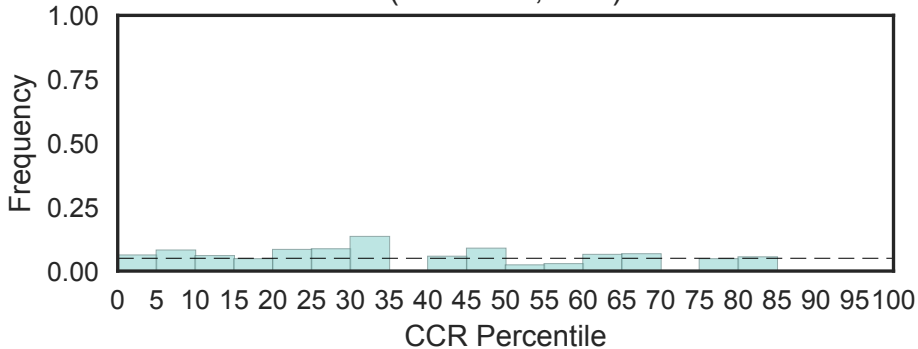

Uncharacterised protein family UPF0556  
(UPF0556, N=1)

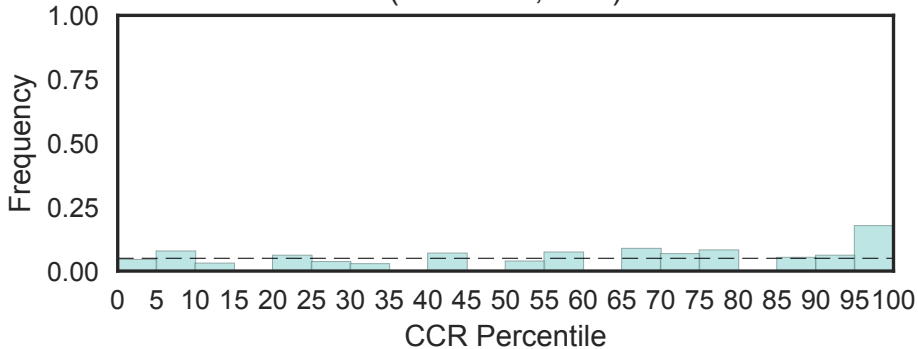



Uncharacterised protein family UPF0560  
(UPF0560, N=4)

Fisher's OR: 0.461; Bonferroni p-val: 1

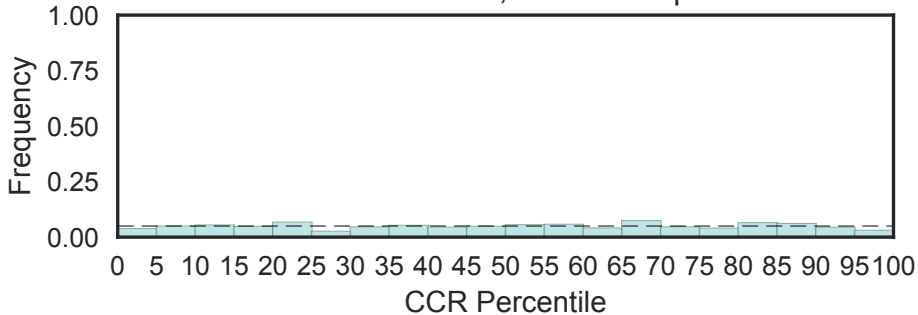

Uncharacterised protein family UPF0561  
(UPF0561, N=1)

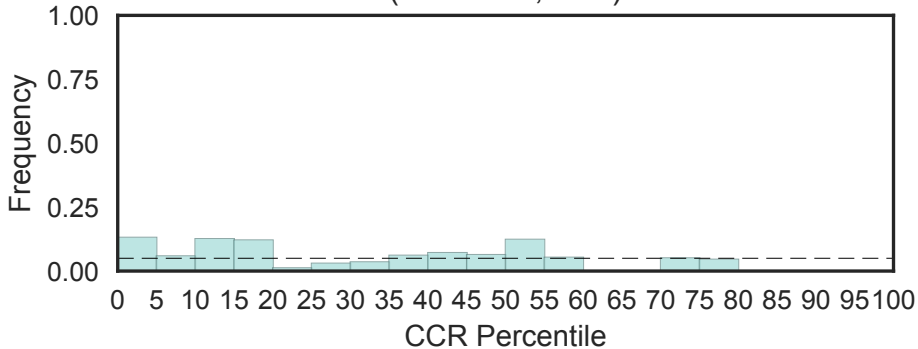

Uncharacterised protein family UPF0564  
(UPF0564, N=2)

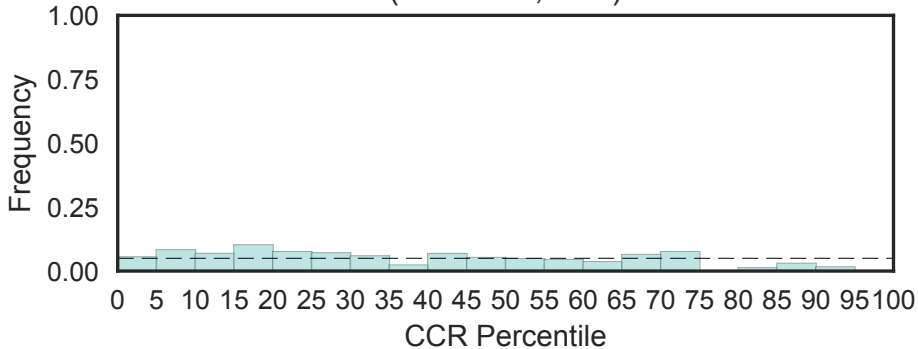

Uncharacterised protein family UPF0565  
(UPF0565, N=1)

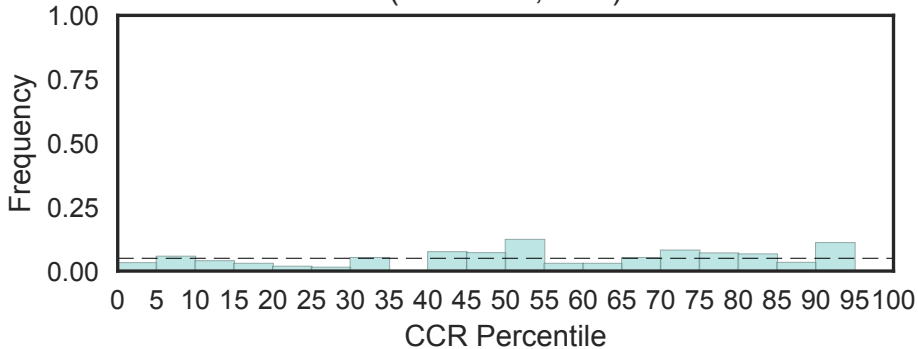

Uncharacterised protein family UPF0640  
(UPF0640, N=1)

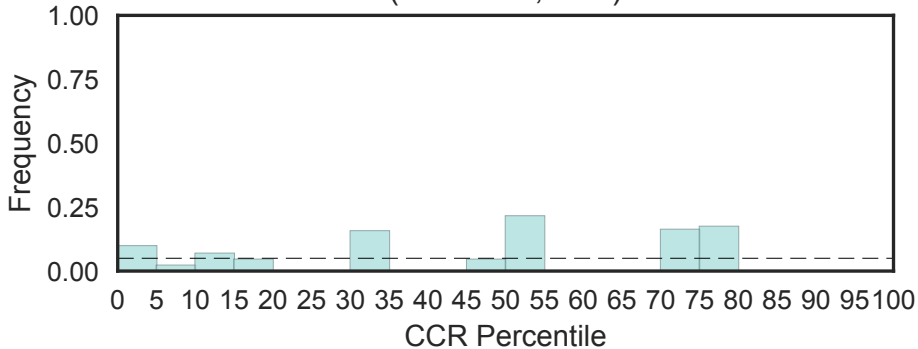

Putative cytokine, C6ORF120  
(UPF0669, N=1)

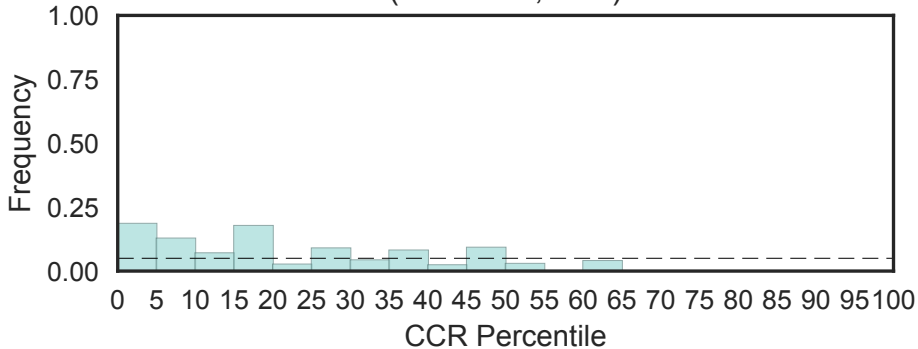

UPF0688 family  
(UPF0688, N=1)

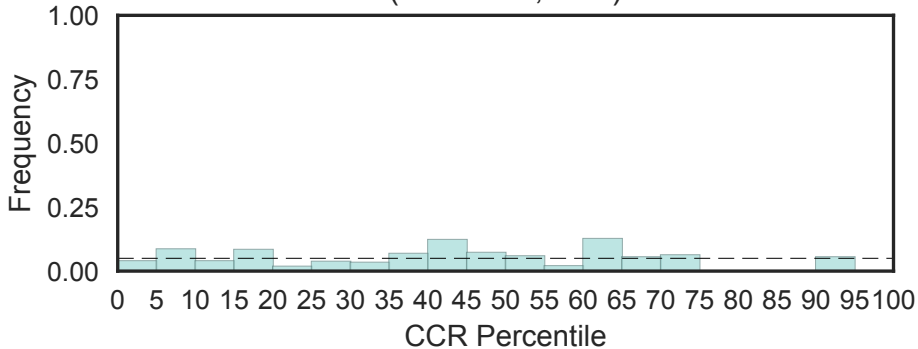

Uncharacterised protein family UPF0697  
(UPF0697, N=1)

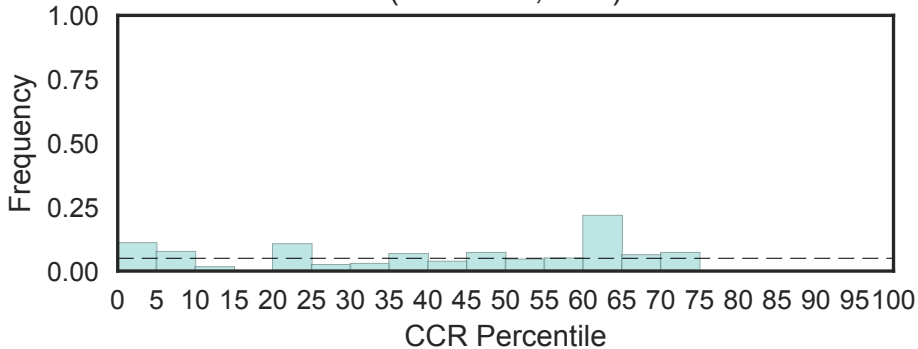



Uncharacterised protein family UPF0728  
(UPF0728, N=2)

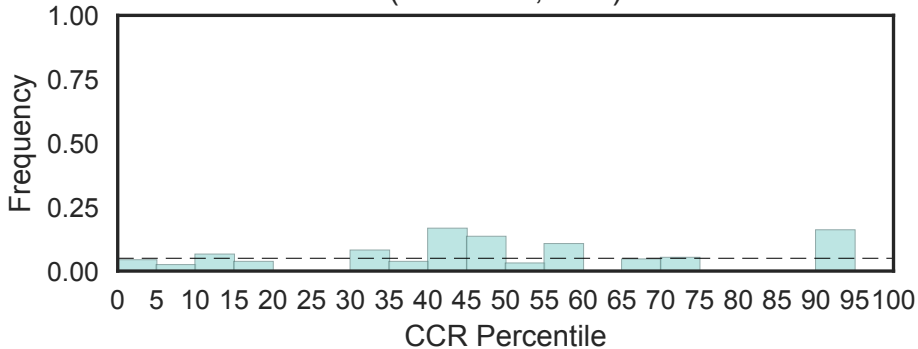

UPF0731 family  
(UPF0731, N=2)

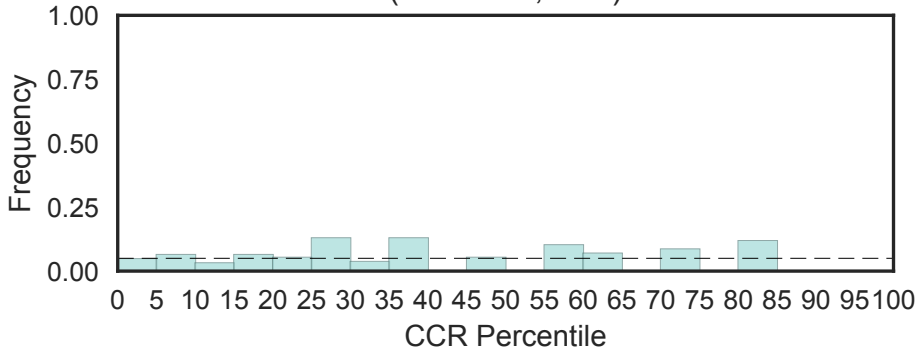

UPF0767 family  
(UPF0767, N=1)

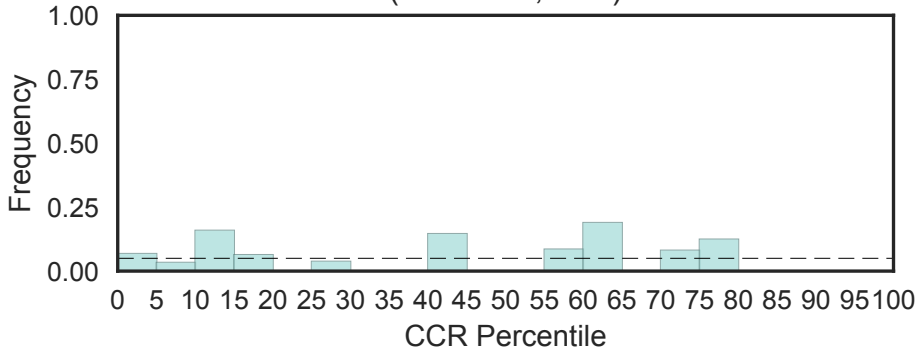

RNA helicase (UPF2 interacting domain)  
(UPF1\_Zn\_bind, N=1)

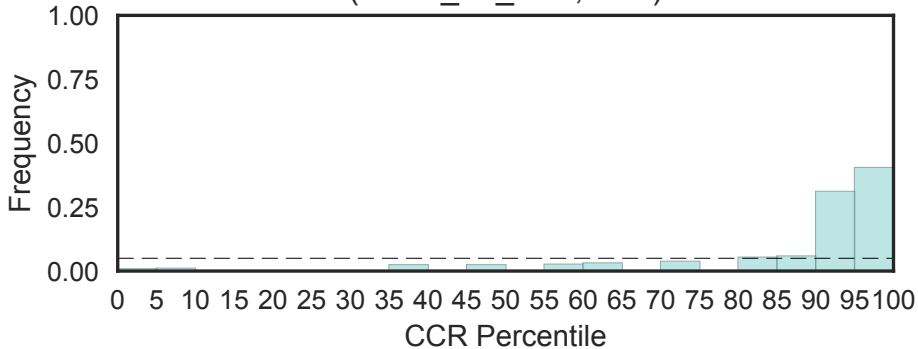

# Uracil phosphoribosyltransferase (UPRTase, N=1)

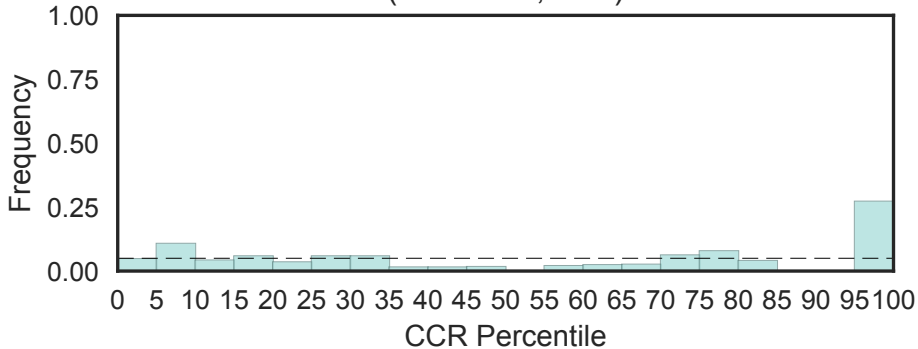

Ubiquitin-conjugating enzyme  
(UQ\_con, N=40)

Fisher's OR: 7.58; Bonferroni p-val: 1.38e-30

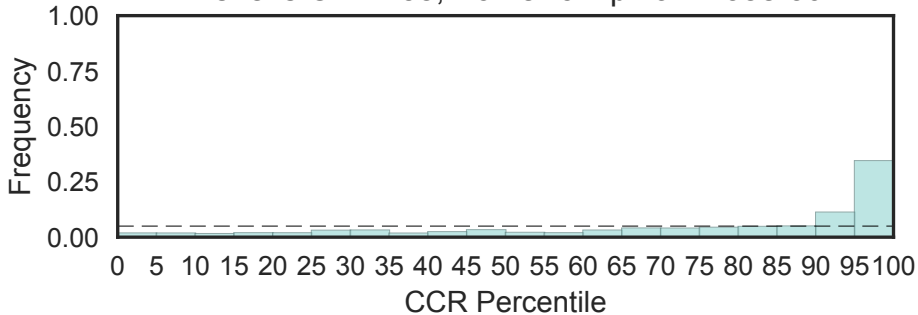

Uroporphyrinogen decarboxylase (URO-D)  
(URO-D, N=1)

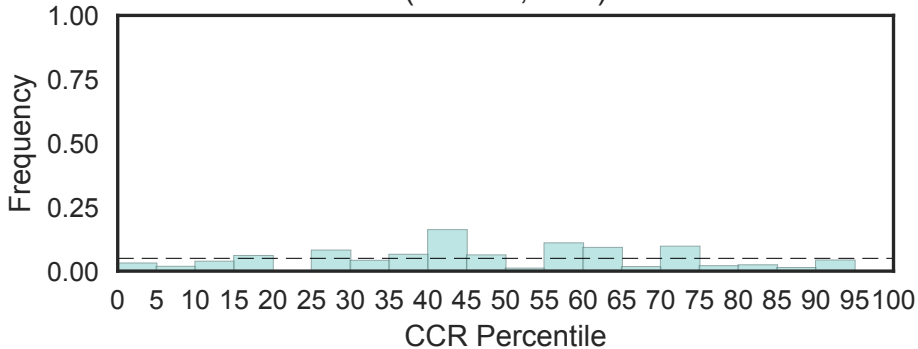

Linker region of USP19 deubiquitinase  
(USP19\_linker, N=1)

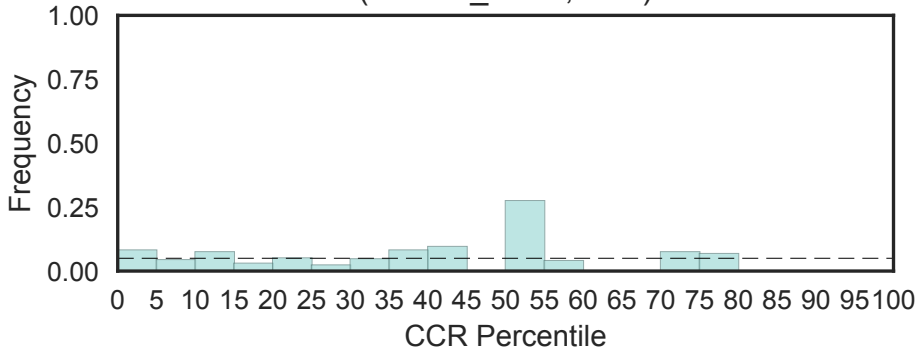



Ubiquitin-specific protease C-terminal  
(USP7\_C2, N=2)

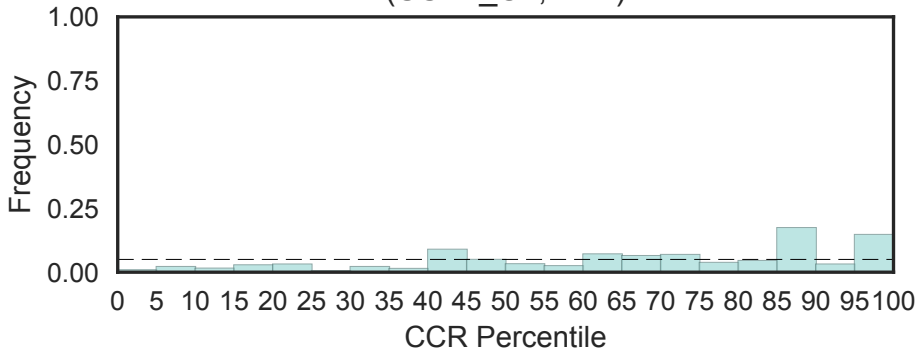

ICP0-binding domain of Ubiquitin-specific protease 7  
(USP7\_ICP0\_bdg, N=1)

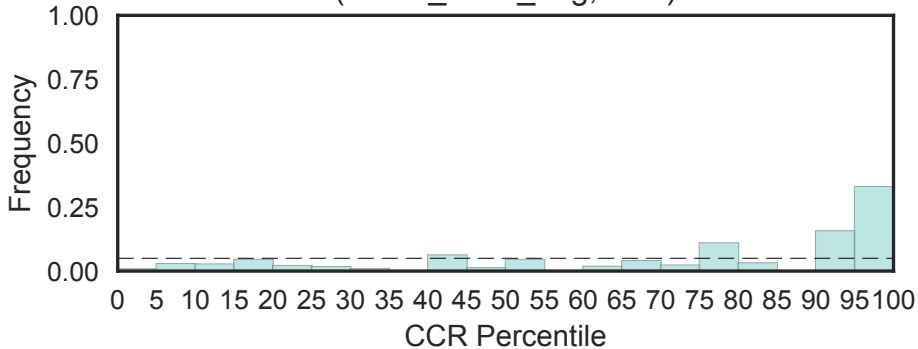

USP8 dimerisation domain  
(USP8\_dimer, N=3)

Fisher's OR: 3.18; Bonferroni p-val: 1

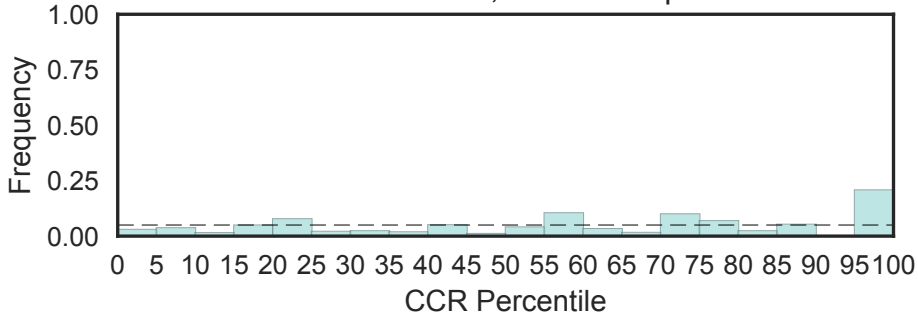

USP8 interacting  
(USP8\_interact, N=1)

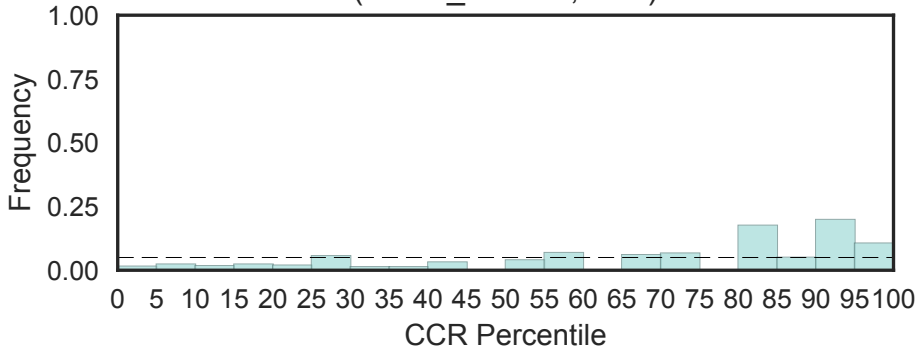

Urea transporter  
(UT, N=3)

Fisher's OR: 0; Bonferroni p-val: 1

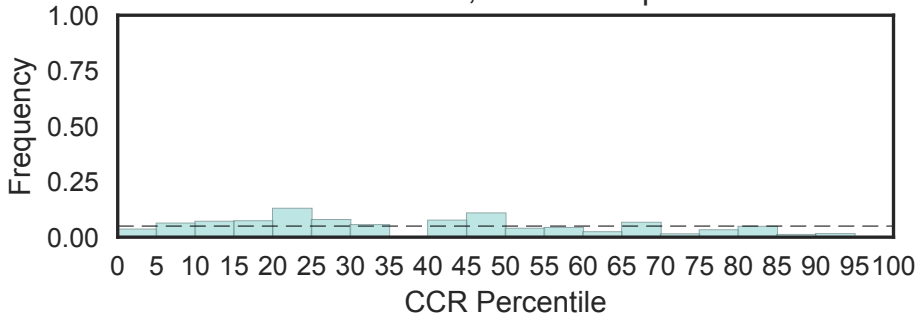

UTP15 C terminal  
(UTP15\_C, N=1)

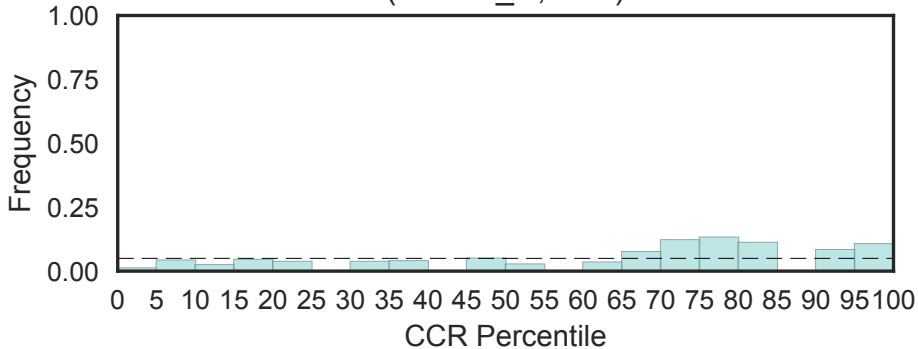

Utp25, U3 small nucleolar RNA-associated SSU processome protein 25  
(UTP25, N=1)

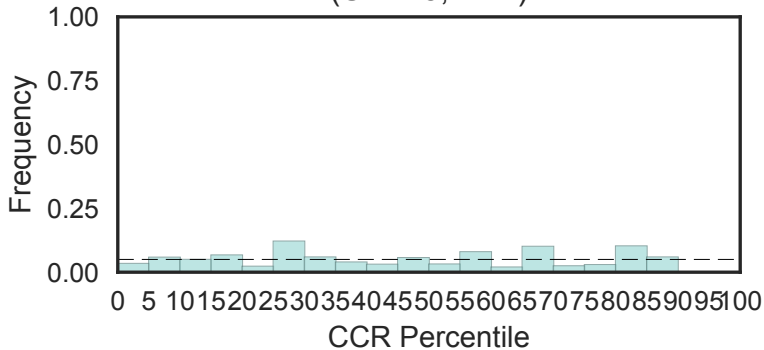

UDP-glucuronate decarboxylase N-terminal  
(UXS1\_N, N=1)

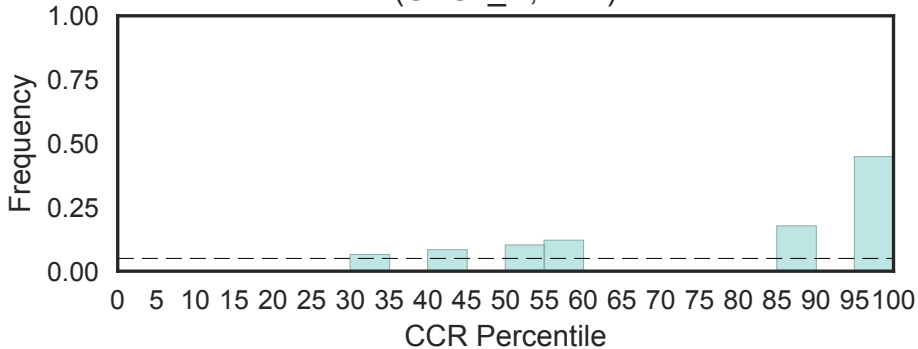



UbiA prenyltransferase family  
(UbiA, N=3)

Fisher's OR: 0; Bonferroni p-val: 1

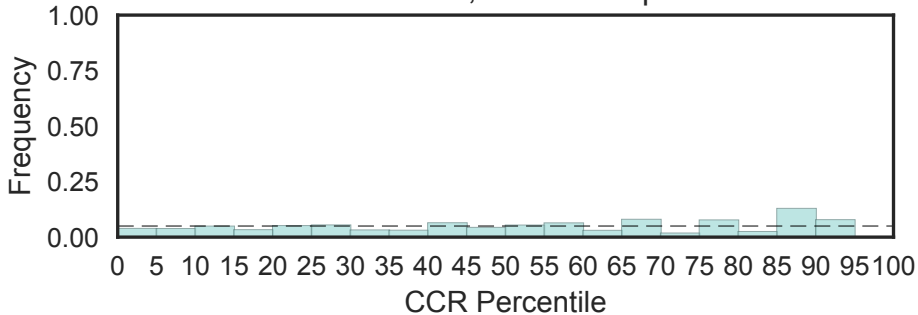

ubiE/COQ5 methyltransferase family

(Ubie\_methyltran, N=13)

Fisher's OR: 0; Bonferroni p-val: 1

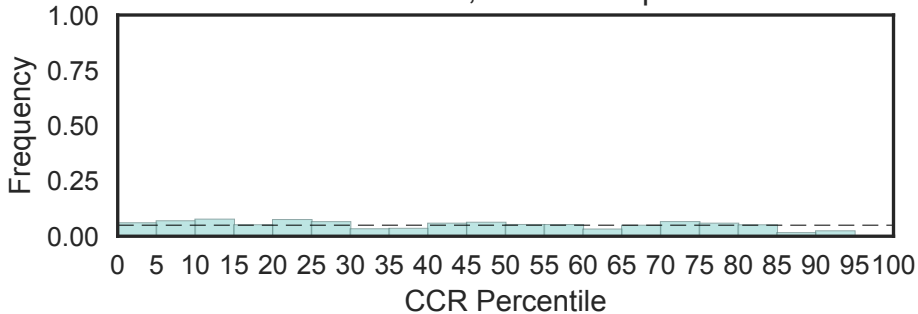

Ubiquinol-cytochrome C chaperone  
(Ubiq\_cyt\_C\_chap, N=2)

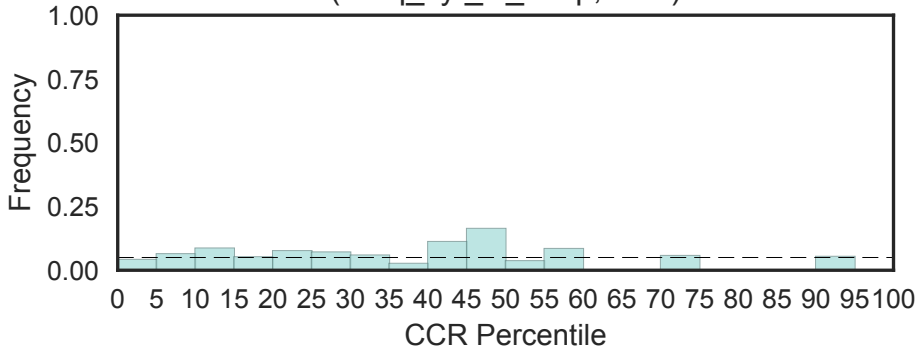

Ubiquitin-like domain  
(Ubiquitin\_2, N=35)  
Fisher's OR: 2.7; Bonferroni p-val: 1

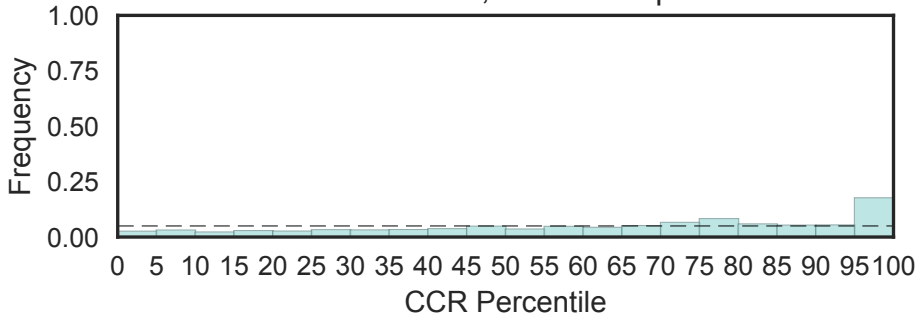

# Ubiquitin-like domain

(Ubiquitin\_3, N=3)

Fisher's OR: 2.21; Bonferroni p-val: 1

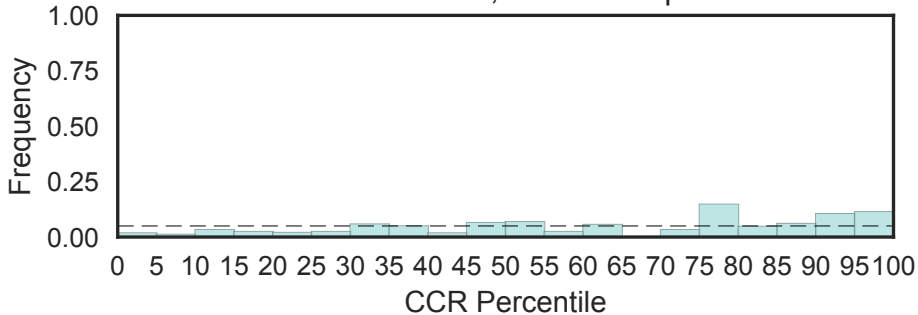

UcrQ family  
(UcrQ, N=1)

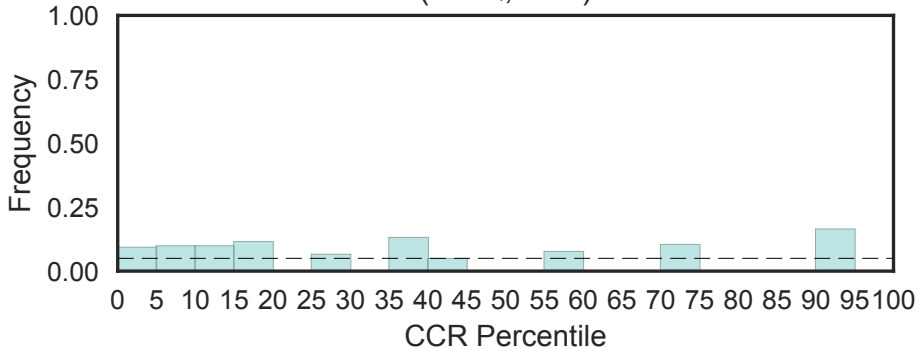

Ubiquitin elongating factor core  
(Ufd2P\_core, N=2)

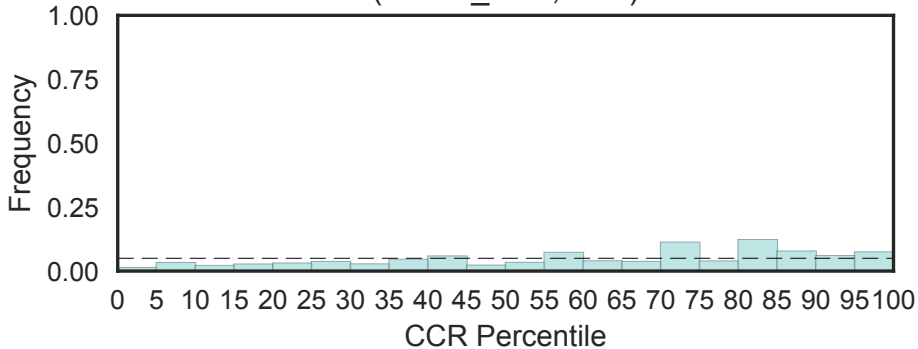

Ubiquitin fold modifier 1 protein  
(Ufm1, N=1)

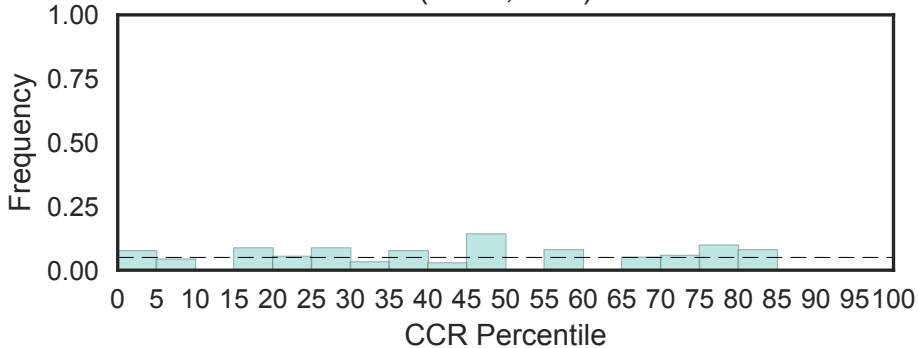



ASPIC and UnbV  
(UnbV\_ASPIC, N=1)

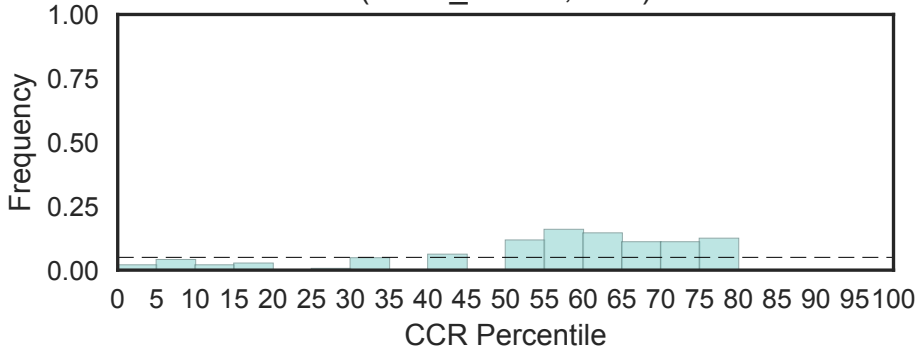

# Up-frameshift suppressor 2 (Upf2, N=1)

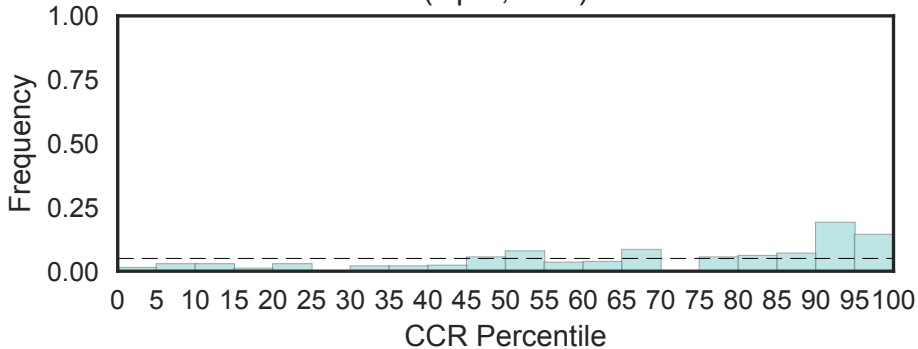

Urb2/Npa2 family  
(Urb2, N=1)

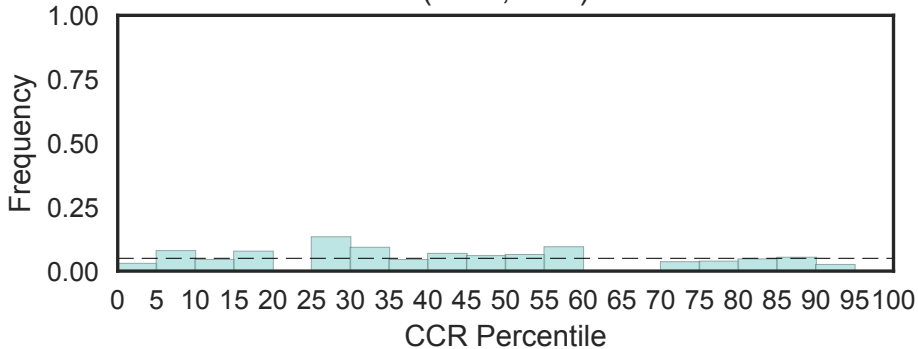

Urm1 (Ubiquitin related modifier)  
(Urm1, N=1)

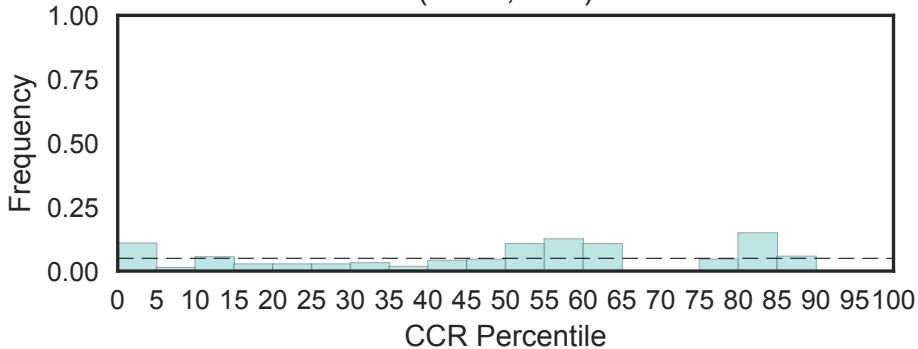

Urocanase Rossmann-like domain  
(Urocanase, N=1)

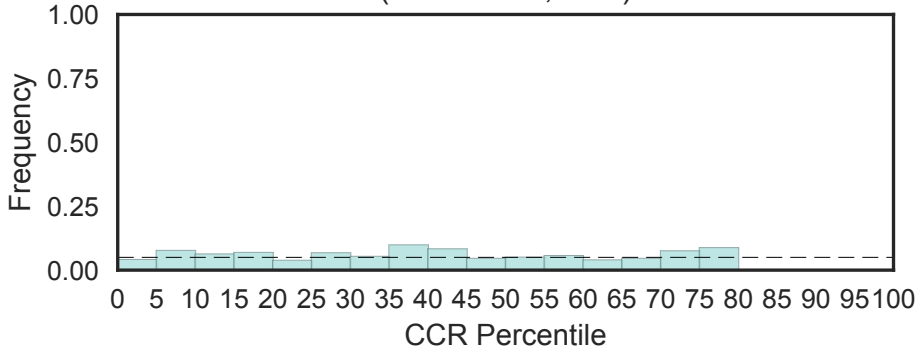

Urocanase C-terminal domain  
(Urocanase\_C, N=1)

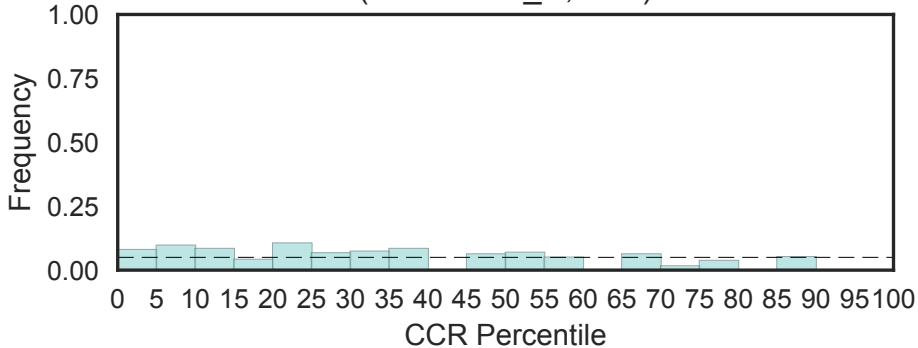

Urocanase N-terminal domain  
(Urocanase\_N, N=1)

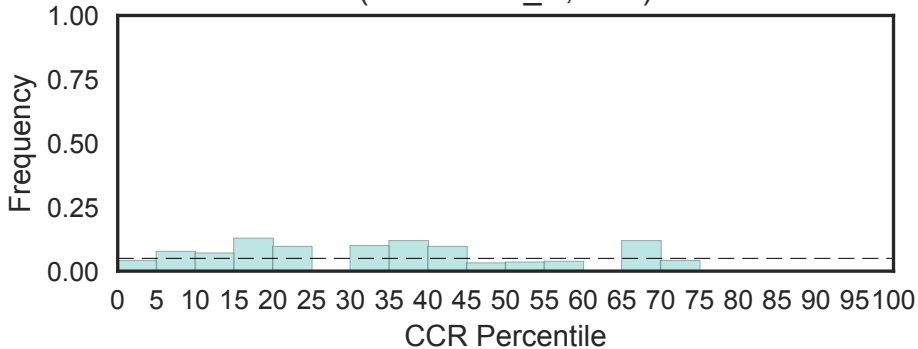

# Uroplakin II

(Uroplakin\_II, N=1)

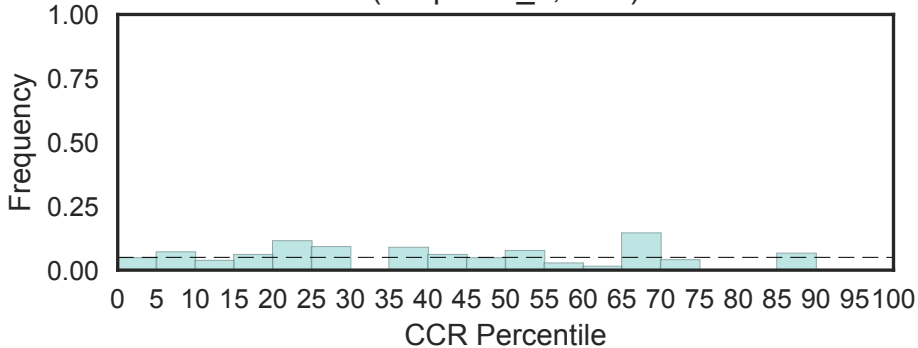



Urotensin II  
(Urotensin\_II, N=2)

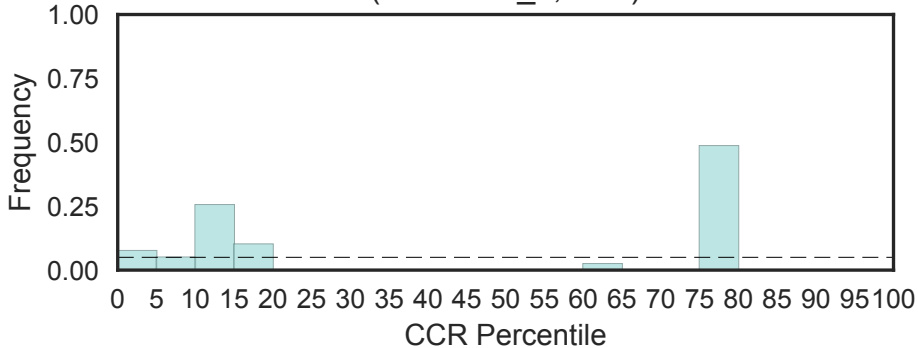

# Membrane fusion protein Use1 (Use1, N=1)

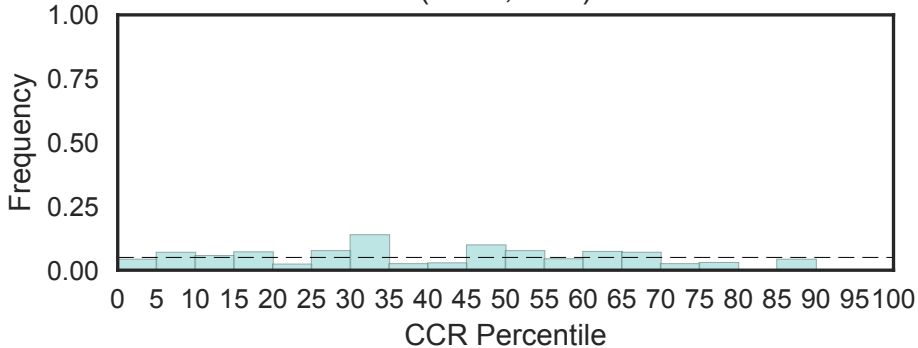

Uso1 / p115 like vesicle tethering protein, C terminal region  
(Uso1\_p115\_C, N=1)

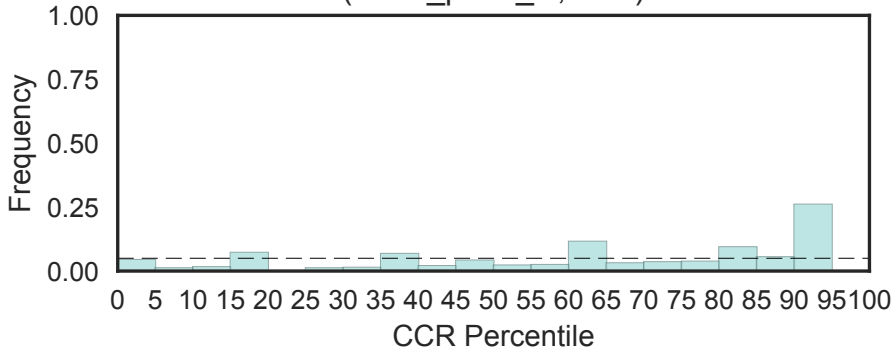

Uso1 / p115 like vesicle tethering protein, head region  
(Uso1\_p115\_head, N=1)

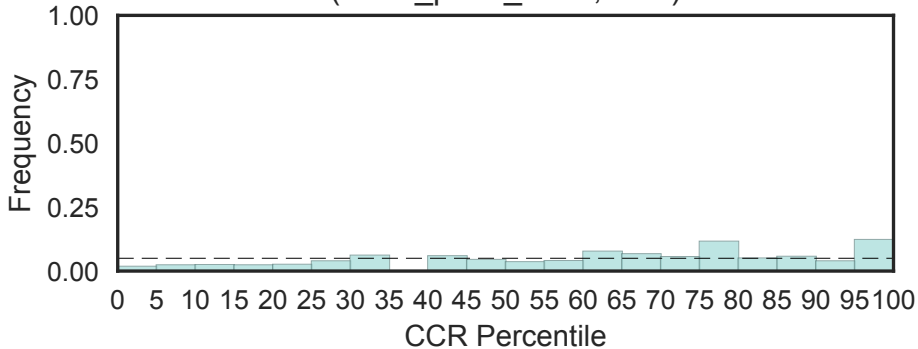

Uteroglobin family  
(Uteroglobin, N=9)

Fisher's OR: 0; Bonferroni p-val: 1

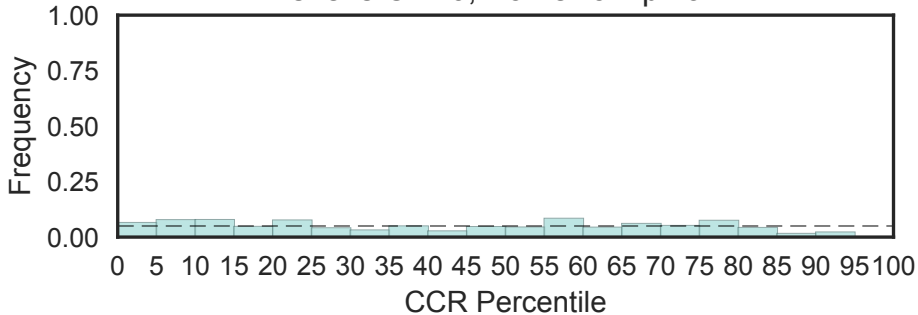

Utp11 protein  
(Utp11, N=1)

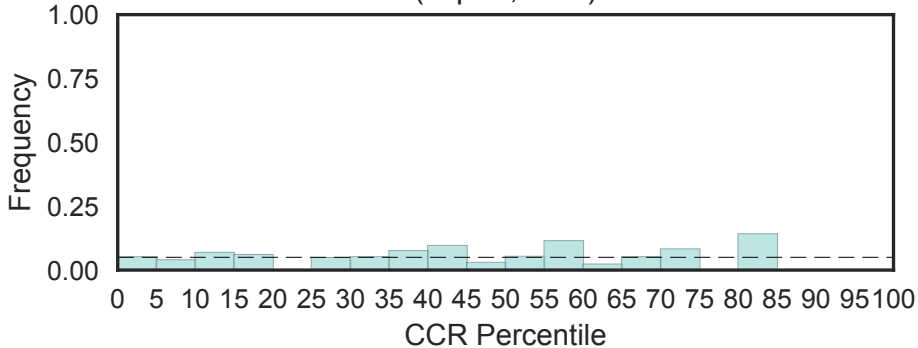

Dip2/Utp12 Family  
(Utp12, N=3)

Fisher's OR: 0; Bonferroni p-val: 1

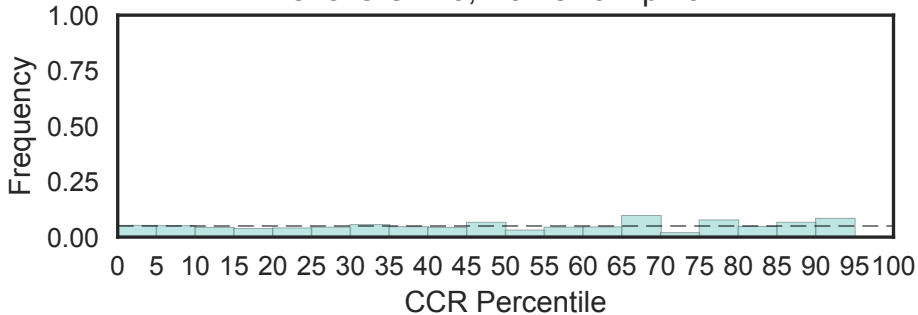

Utp13 specific WD40 associated domain  
(Utp13, N=1)

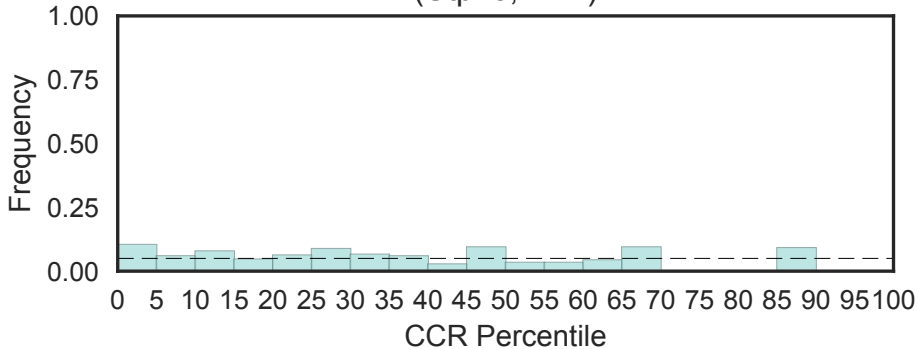



Utp14 protein  
(Utp14, N=1)

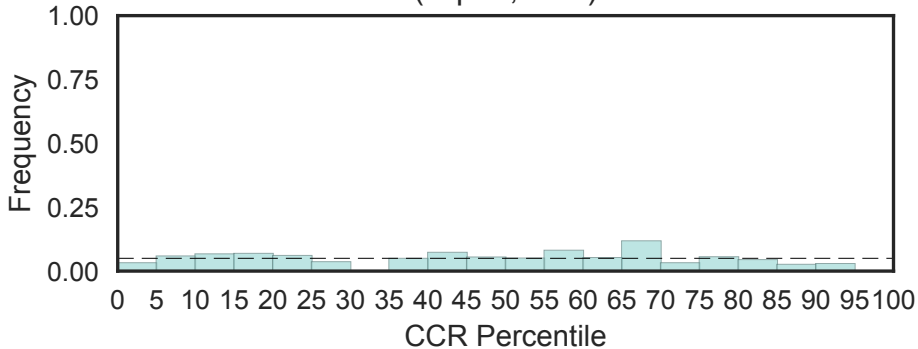

UvrD/REP helicase N-terminal domain  
(UvrD-helicase, N=2)

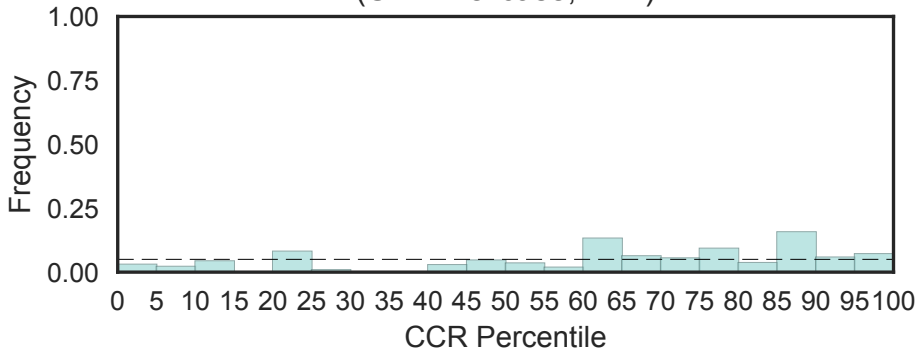

UvrD-like helicase C-terminal domain  
(UvrD\_C, N=1)

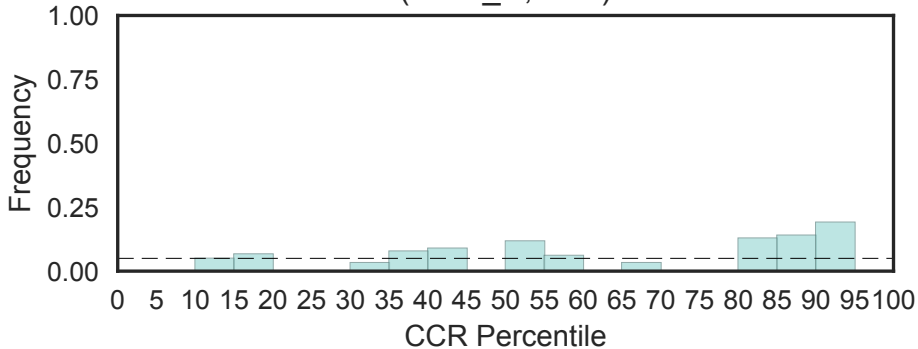

UvrD-like helicase C-terminal domain  
(UvrD\_C\_2, N=2)

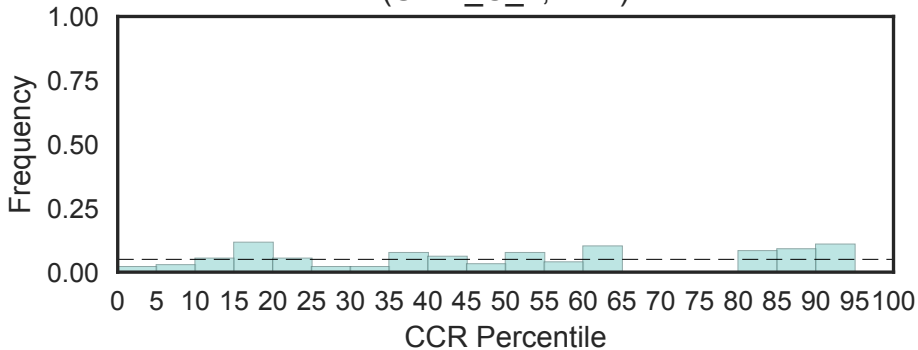

V-ATPase subunit C  
(V-ATPase\_C, N=2)

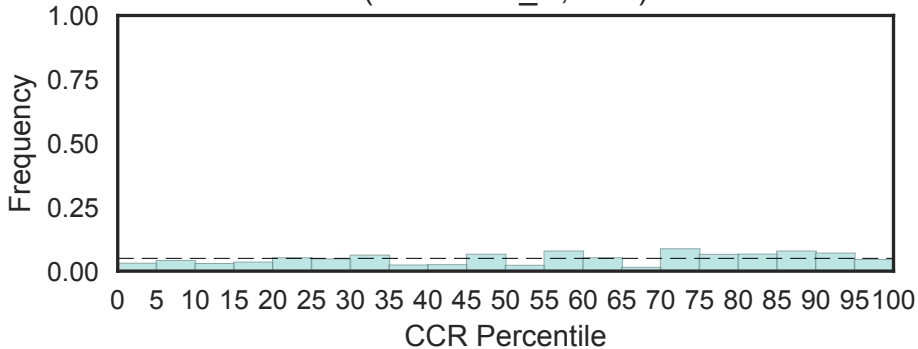

Vacuolar (H<sup>+</sup>)-ATPase G subunit  
(V-ATPase\_G, N=3)  
Fisher's OR: 1.72; Bonferroni p-val: 1

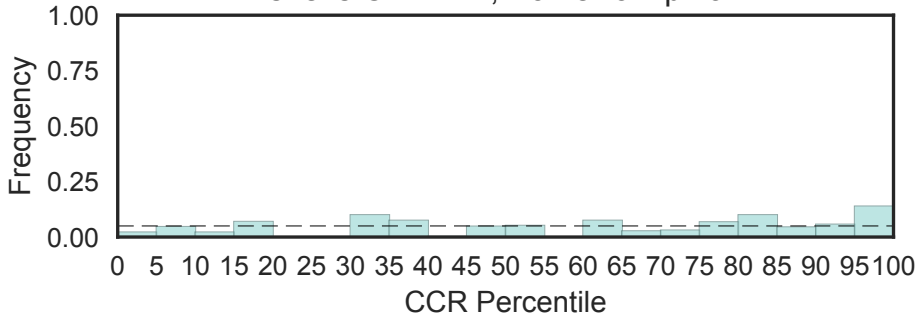

V-ATPase subunit H  
(V-ATPase\_H\_C, N=1)

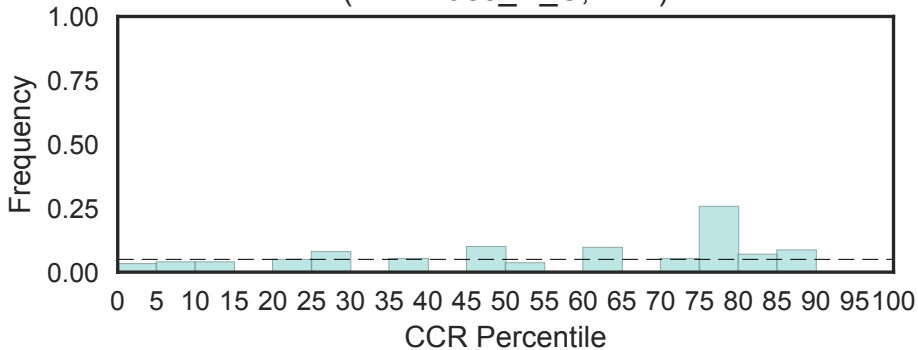

V-ATPase subunit H  
(V-ATPase\_H\_N, N=2)

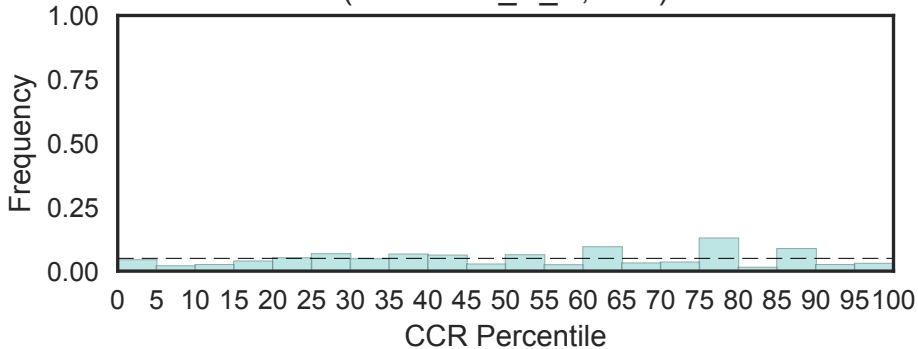



Vesicle transport v-SNARE protein N-terminus  
(V-SNARE, N=3)

Fisher's OR: 0; Bonferroni p-val: 1

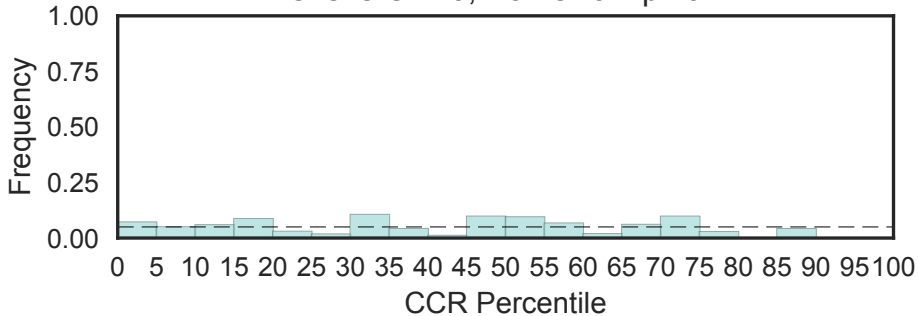

Snare region anchored in the vesicle membrane C-terminus  
(V-SNARE\_C, N=4)

Fisher's OR: 0; Bonferroni p-val: 1

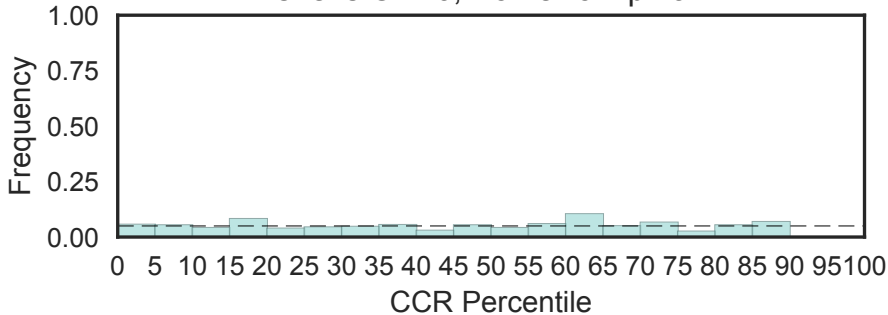

Immunoglobulin V-set domain  
(V-set, N=201)

Fisher's OR: 0.438; Bonferroni p-val: 0.00747

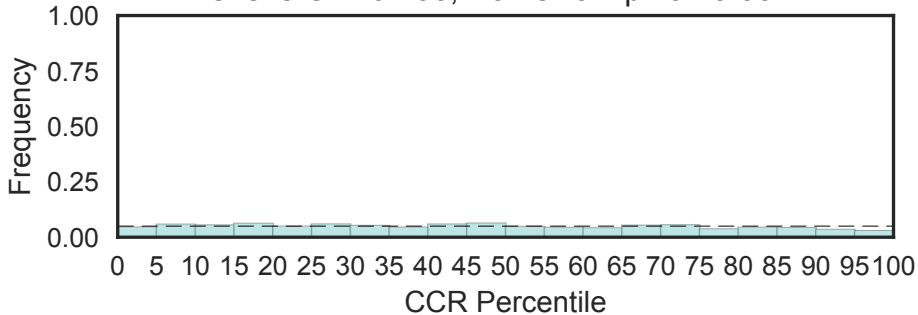

ICOS V-set domain  
(V-set\_2, N=2)

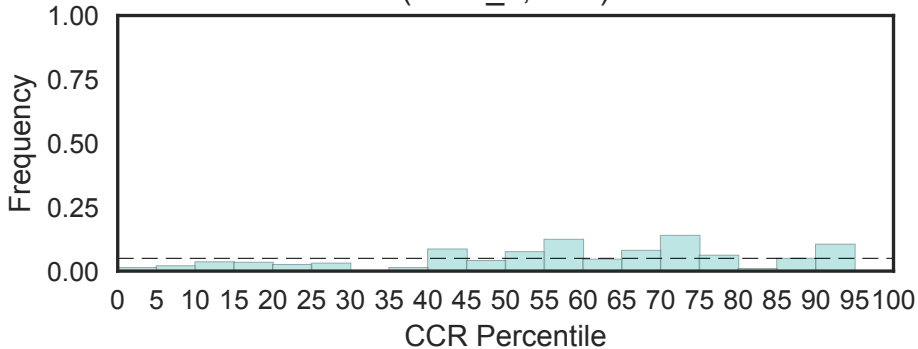

CD47 immunoglobulin-like domain  
(V-set\_CD47, N=2)

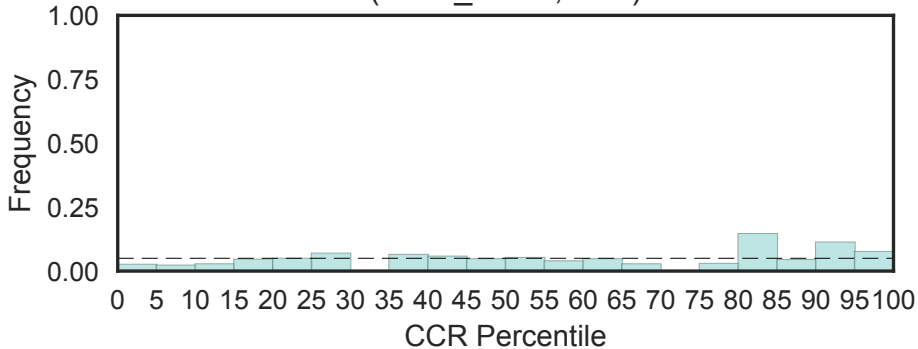

Vomerolnasal organ pheromone receptor family, V1R  
(V1R, N=4)

Fisher's OR: 0; Bonferroni p-val: 1

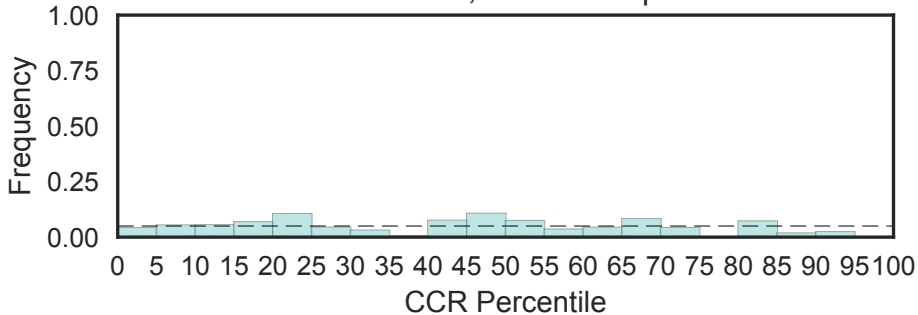

# Vitamin A-deficiency (VAD) rat model signalling (VAD1-2, N=1)

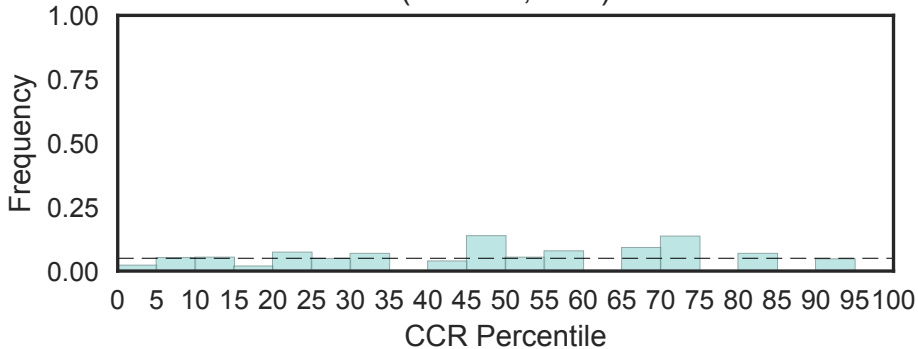

VASP tetramerisation domain  
(VASP\_tetra, N=3)  
Fisher's OR: 0; Bonferroni p-val: 1

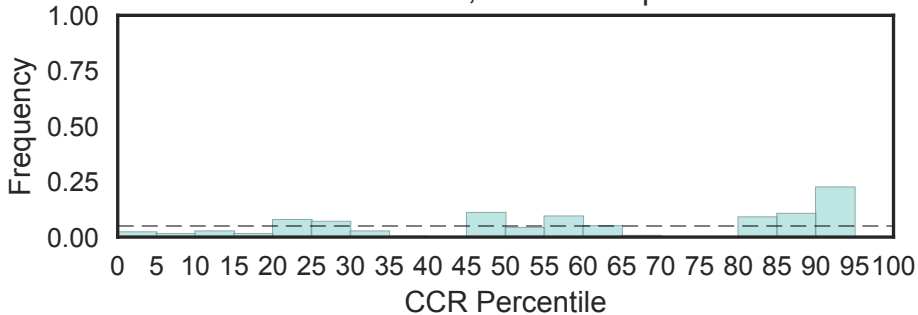



# Vinculin Binding Site (VBS, N=2)

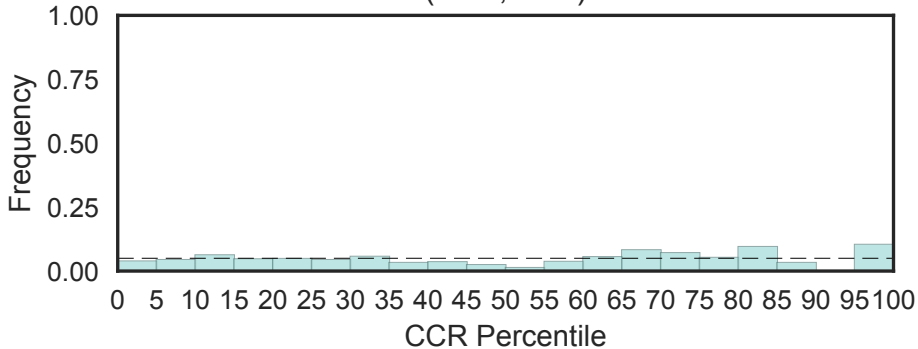

# Repeat domain in *Vibrio*, *Colwellia*, *Bradyrhizobium* and *Shewanella* (VCBS, N=10)

Fisher's OR: 0.377; Bonferroni p-val: 1

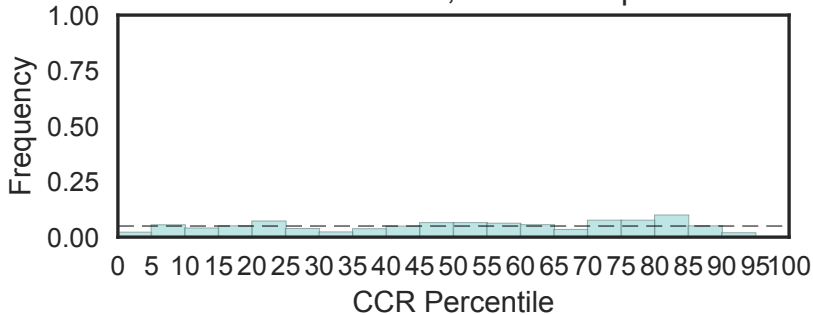

VEFS-Box of polycomb protein  
(VEFS-Box, N=1)

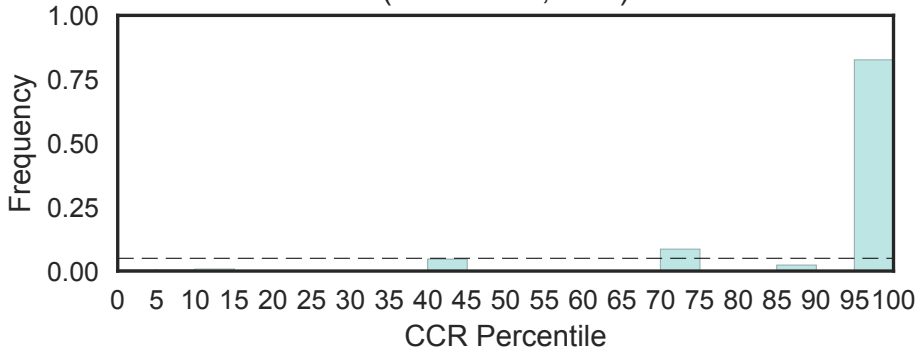

VEGF heparin-binding domain  
(VEGF\_C, N=3)

Fisher's OR: 0; Bonferroni p-val: 1

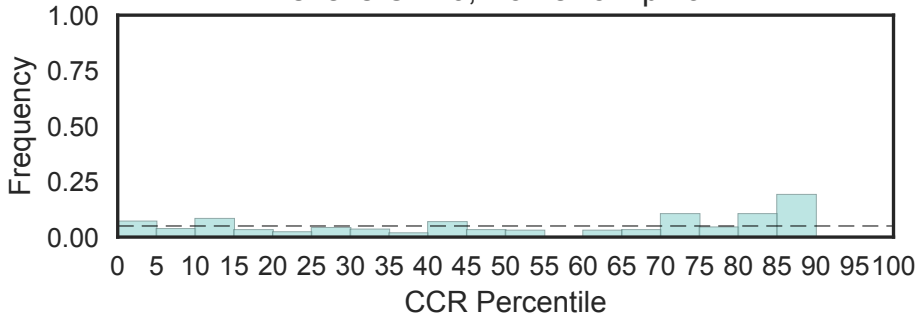

Neuronal voltage-dependent calcium channel alpha 2acd  
(VGCC\_alpha2, N=7)

Fisher's OR: 0.507; Bonferroni p-val: 1

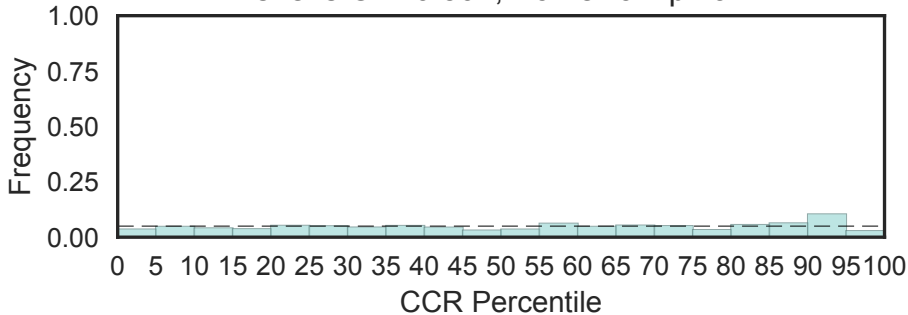

Voltage gated calcium channel subunit beta domain 4Aa N terminal  
(VGCC\_beta4Aa\_N, N=4)

Fisher's OR: 0; Bonferroni p-val: 1

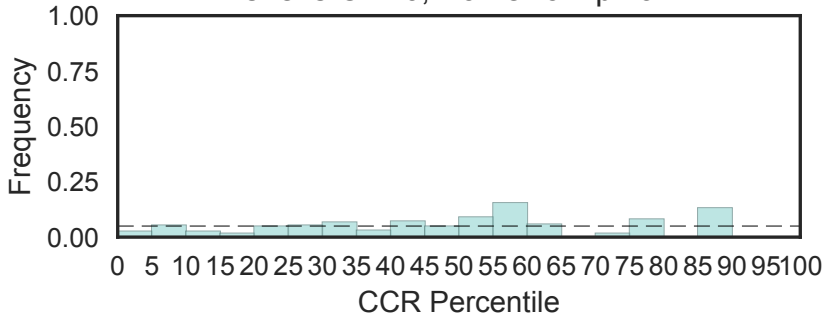

Transcription cofactor vestigial-like protein 4  
(VGLL4, N=1)

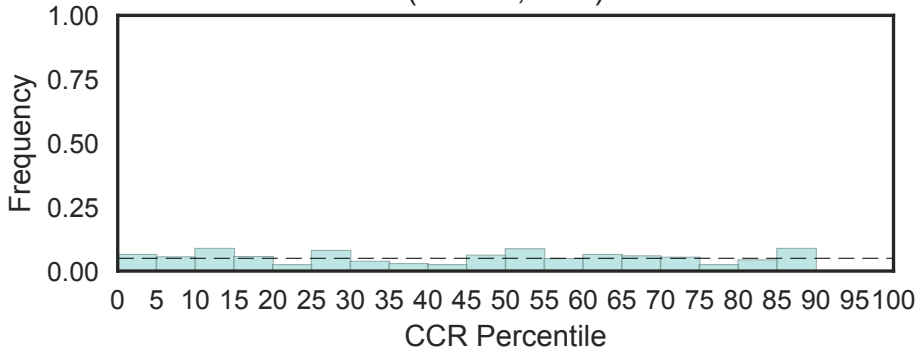

# C-terminal membrane-localisation domain of ion-channel, VCN1 (VGPC1\_C, N=1)

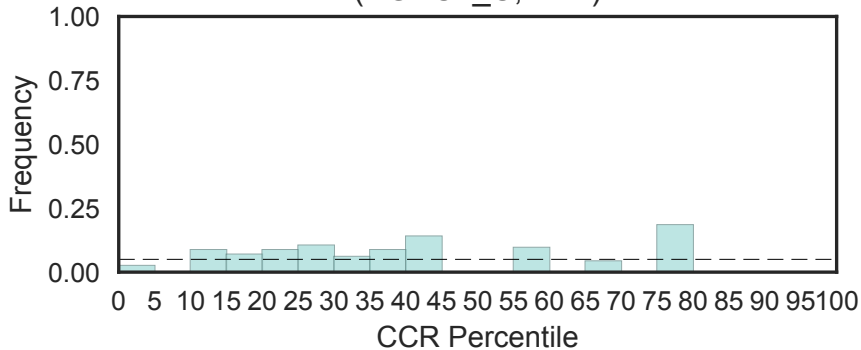



VHL beta domain  
(VHL, N=2)

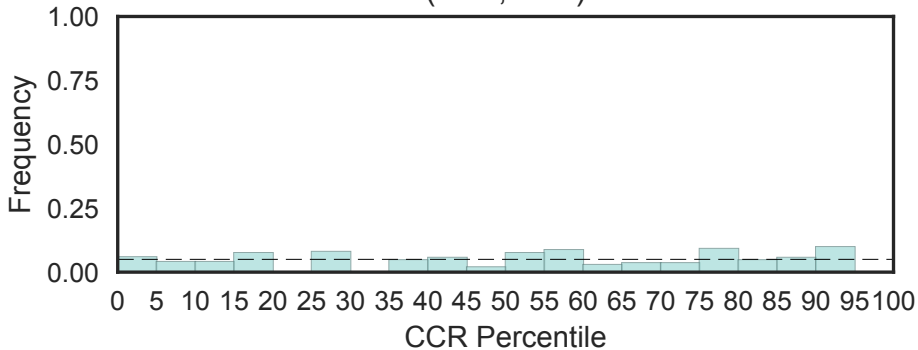

VHL box domain  
(VHL\_C, N=1)

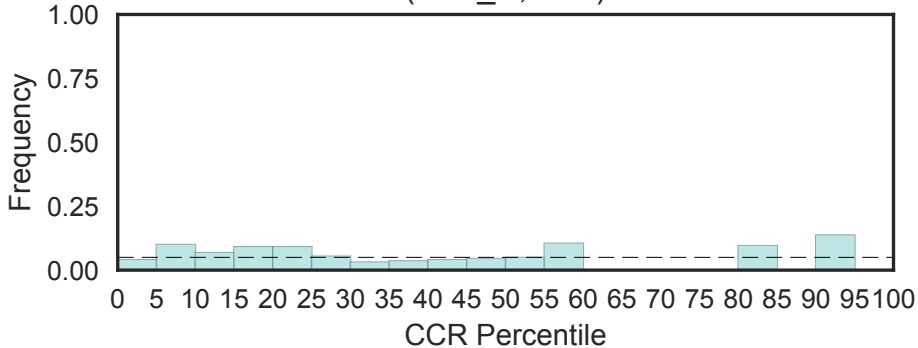

Villin headpiece domain  
(VHP, N=8)

Fisher's OR: 0; Bonferroni p-val: 1

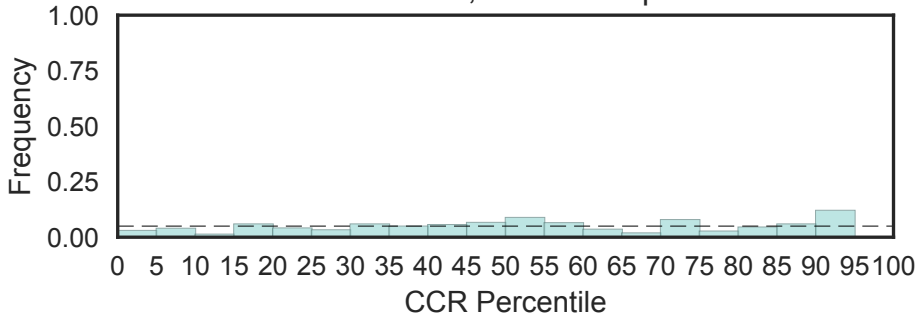

VHS domain  
(VHS, N=10)

Fisher's OR: 1.06; Bonferroni p-val: 1

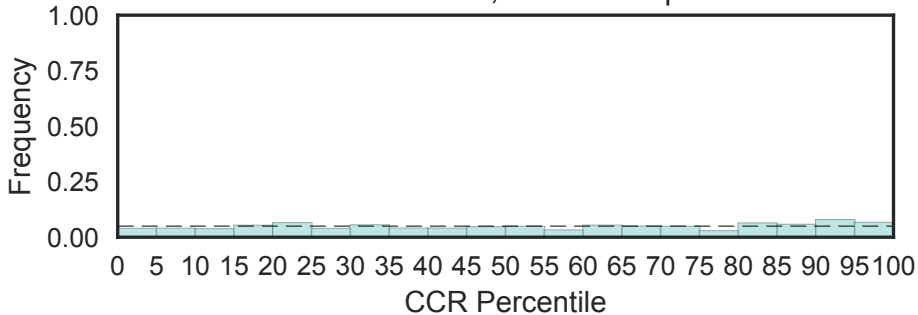

# Helicase-associated putative binding domain, C-terminal (VIGSSK, N=1)

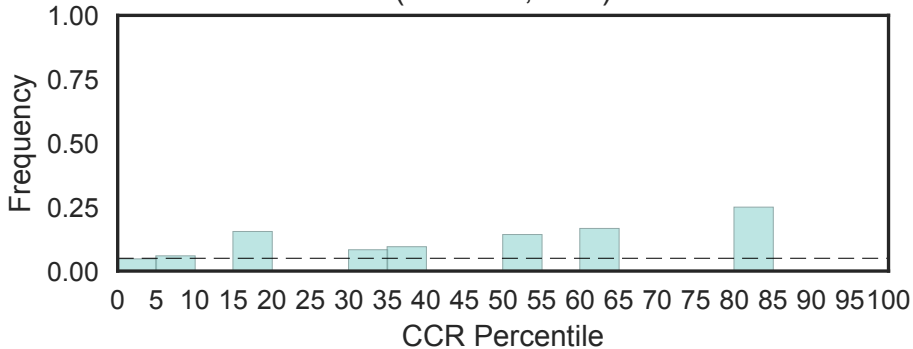

Virilizer, N-terminal  
(VIR\_N, N=2)

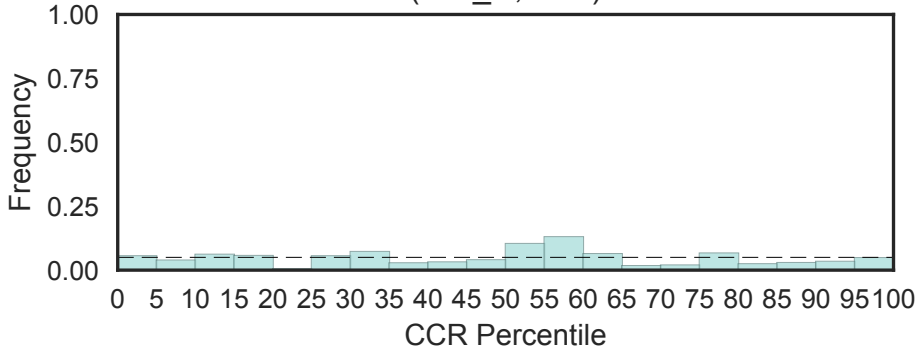

Vault protein inter-alpha-trypsin domain  
(VIT, N=9)

Fisher's OR: 0; Bonferroni p-val: 1

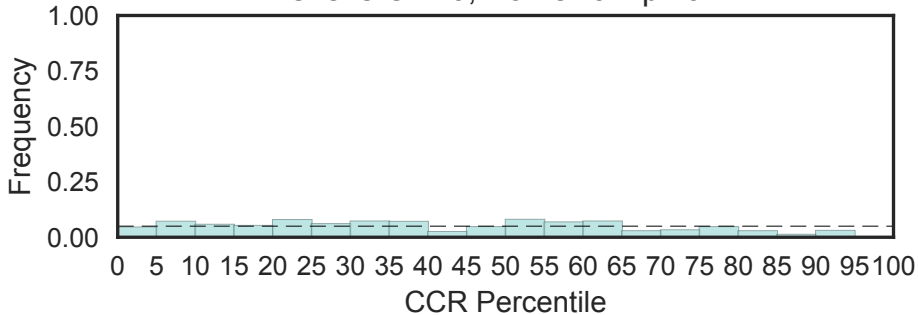

Vault protein inter-alpha-trypsin domain  
(VIT\_2, N=4)

Fisher's OR: 0; Bonferroni p-val: 1

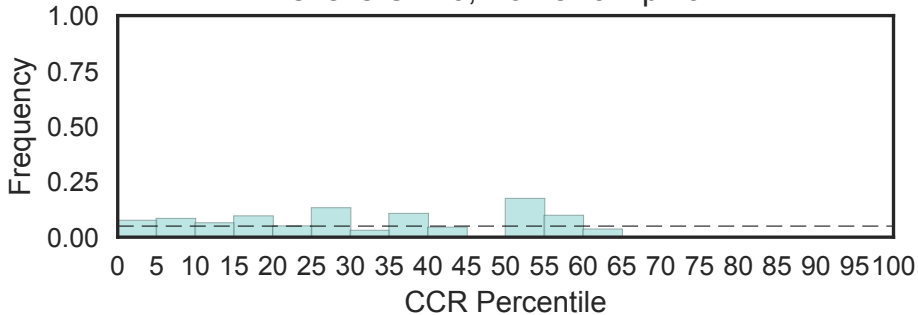



Vitamin K-dependent gamma-carboxylase  
(VKG\_Carbox, N=1)

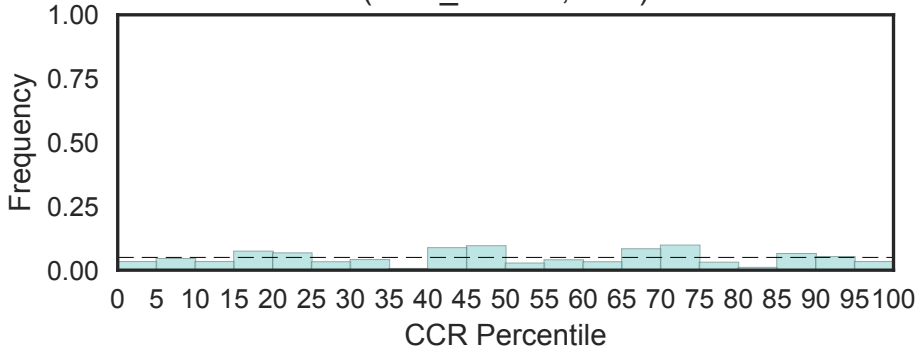

Vitamin K epoxide reductase family  
(VKOR, N=3)

Fisher's OR: 0; Bonferroni p-val: 1

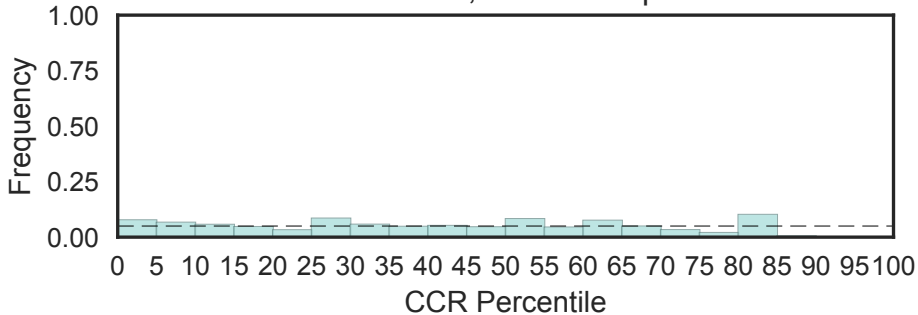

Vitelline membrane outer layer protein I (VOMI)  
(VOMI, N=1)

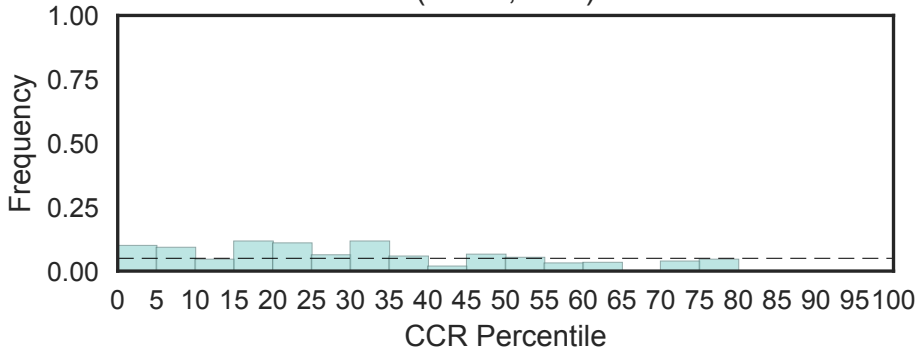

Vacuolar protein sorting protein 11 C terminal  
(VPS11\_C, N=1)

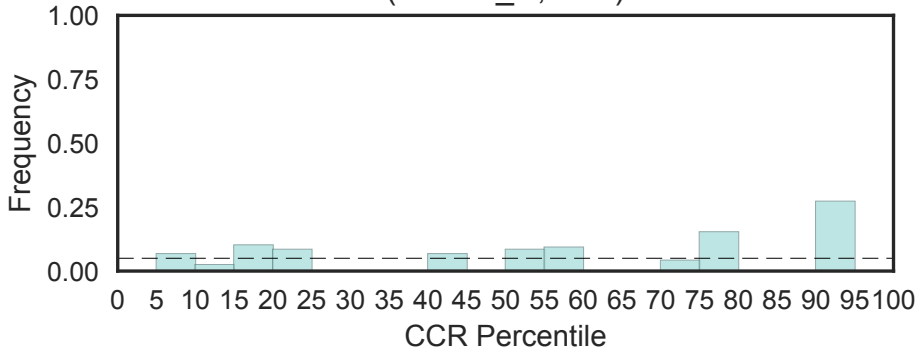

Vacuolar sorting-associated protein 13, N-terminal  
(VPS13, N=3)

Fisher's OR: 0; Bonferroni p-val: 1

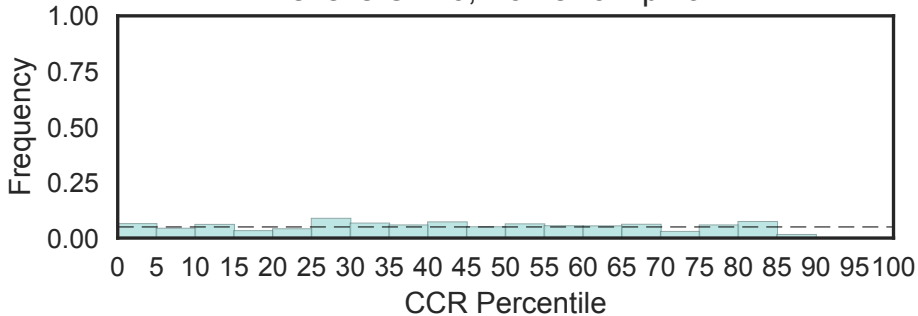

Vacuolar-sorting-associated 13 protein C-terminal  
(VPS13\_C, N=4)

Fisher's OR: 1.01; Bonferroni p-val: 1

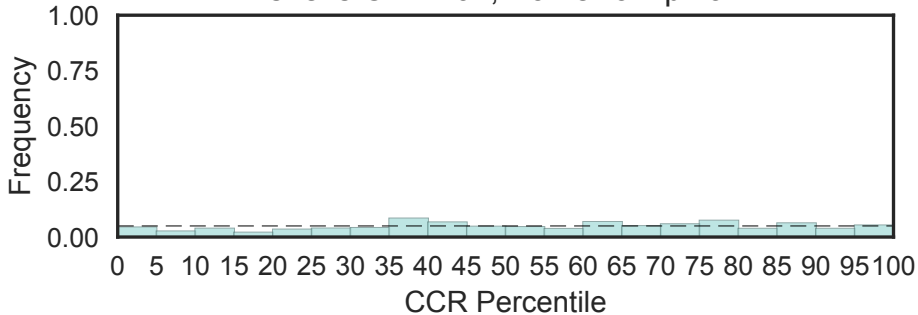

Repeating coiled region of VPS13  
(VPS13\_mid\_rpt, N=6)  
Fisher's OR: 0.236; Bonferroni p-val: 1

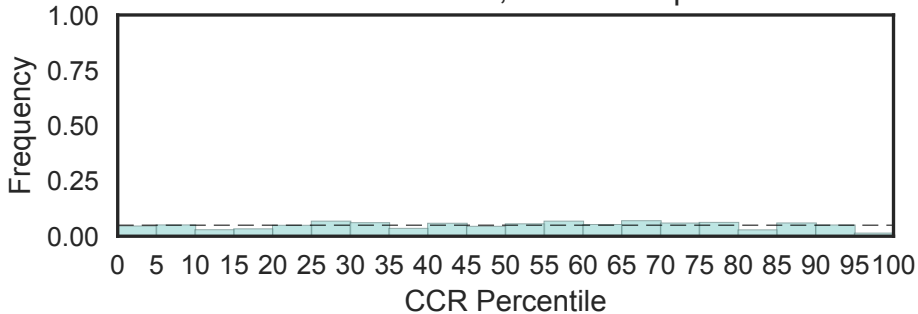

VPS28 protein  
(VPS28, N=1)

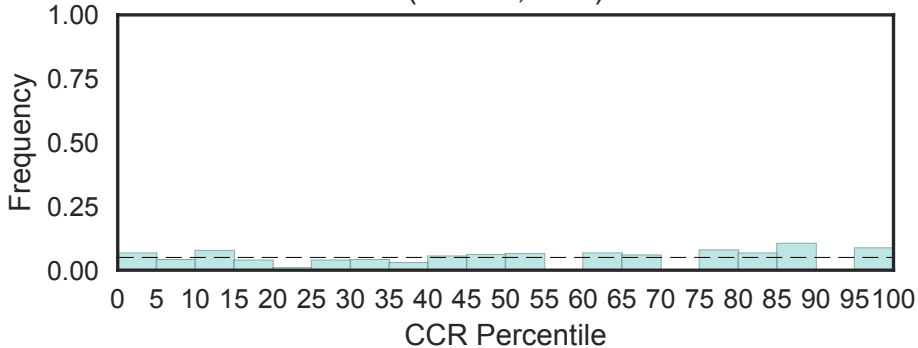



Vacuolar sorting protein 9 (VPS9) domain  
(VPS9, N=11)

Fisher's OR: 1.05; Bonferroni p-val: 1

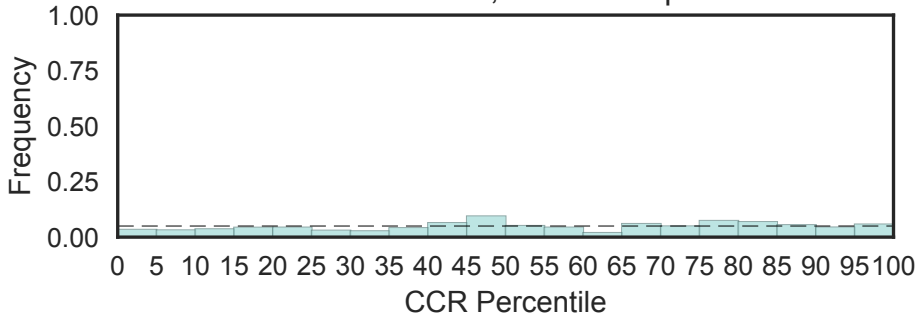

VRR-NUC domain  
(VRR\_NUC, N=1)

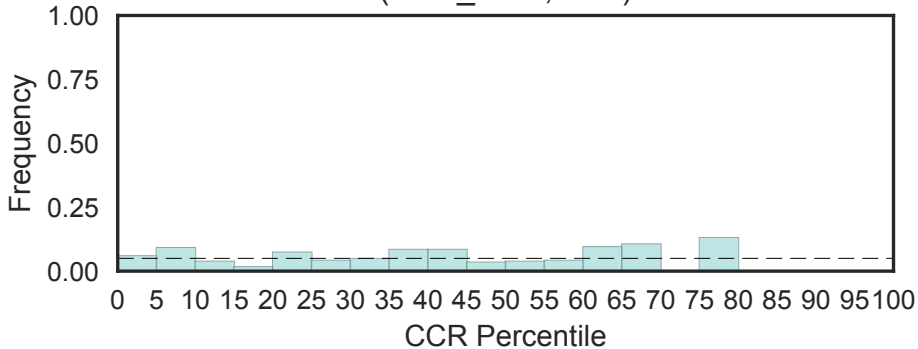

von Willebrand factor type A domain  
(VWA, N=102)

Fisher's OR: 0.357; Bonferroni p-val: 0.000153

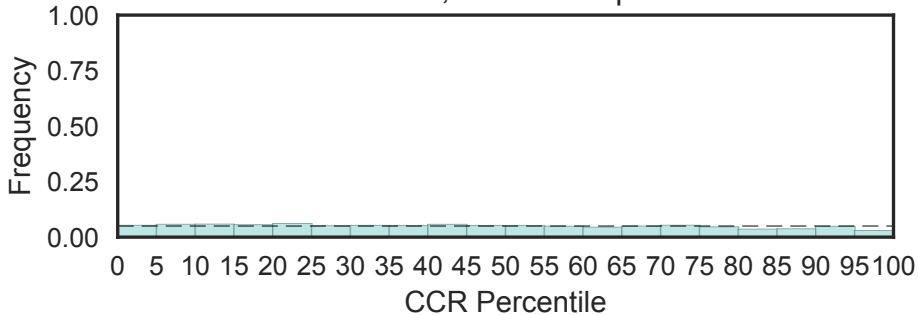

von Willebrand factor type A domain  
(VWA\_2, N=93)

Fisher's OR: 0.482; Bonferroni p-val: 1

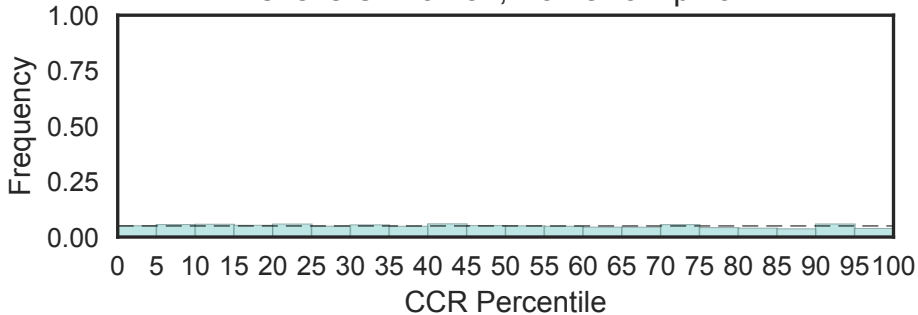

von Willebrand factor type A domain  
(VWA\_3, N=53)

Fisher's OR: 0.495; Bonferroni p-val: 1

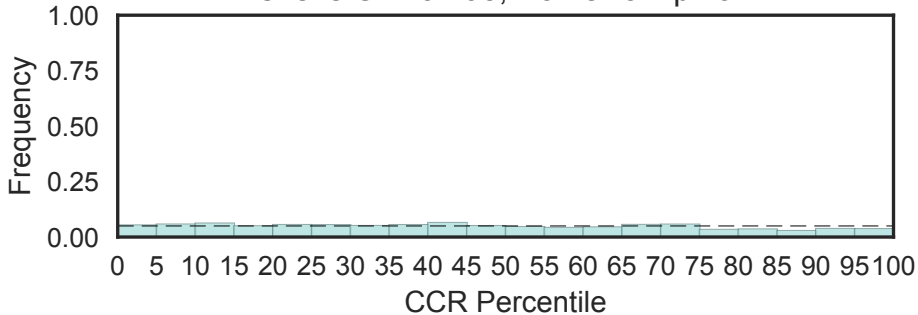

VWA N-terminal  
(VWA\_N, N=5)

Fisher's OR: 0.978; Bonferroni p-val: 1

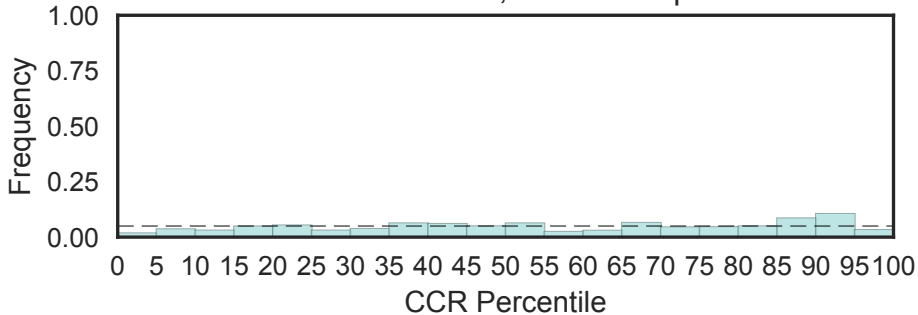

von Willebrand factor type C domain  
(VWC, N=45)

Fisher's OR: 0.956; Bonferroni p-val: 1

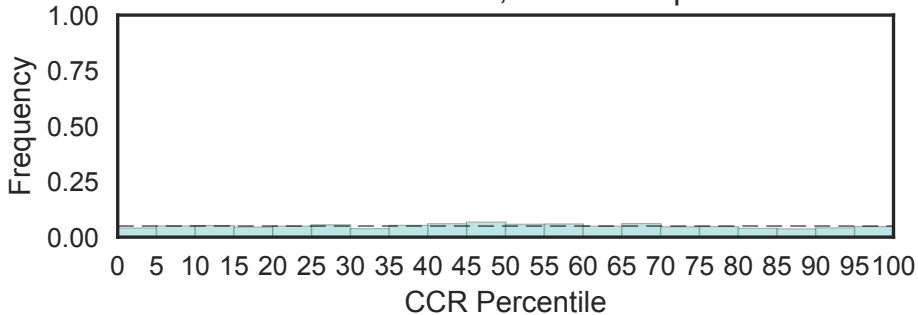

von Willebrand factor type D domain  
(VWD, N=49)

Fisher's OR: 0.231; Bonferroni p-val: 0.283

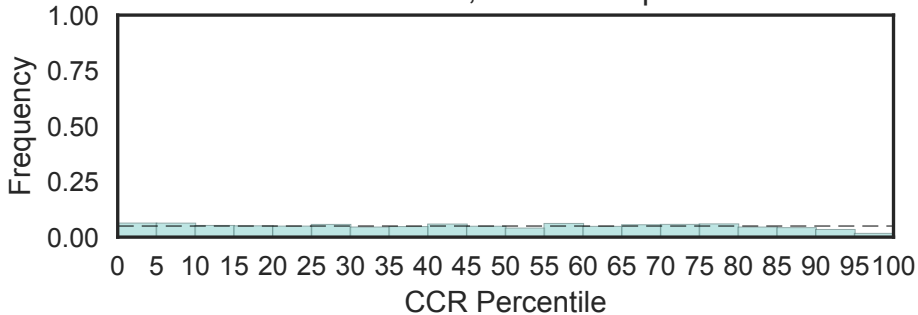



V-type ATPase 116kDa subunit family  
(V\_ATPase\_I, N=6)

Fisher's OR: 0.743; Bonferroni p-val: 1

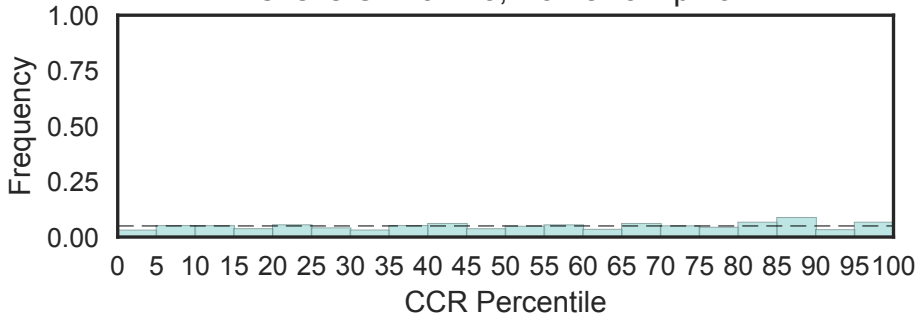

Vacuolar 14 Fab1-binding region  
(Vac14\_Fab1\_bd, N=3)  
Fisher's OR: 4.32; Bonferroni p-val: 1

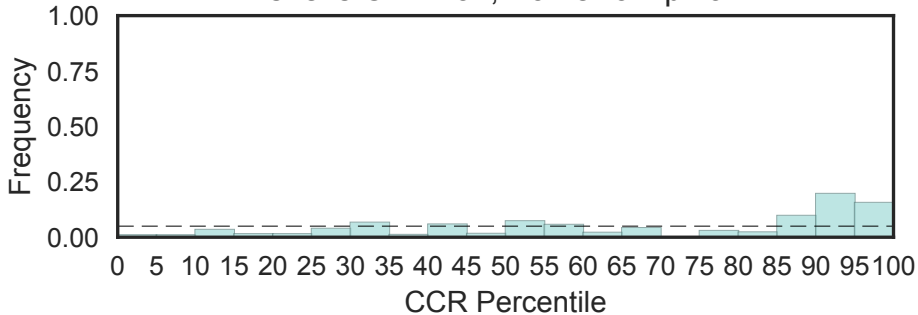

Vacuolar protein 14 C-terminal Fig4p binding  
(Vac14\_Fig4\_bd, N=1)

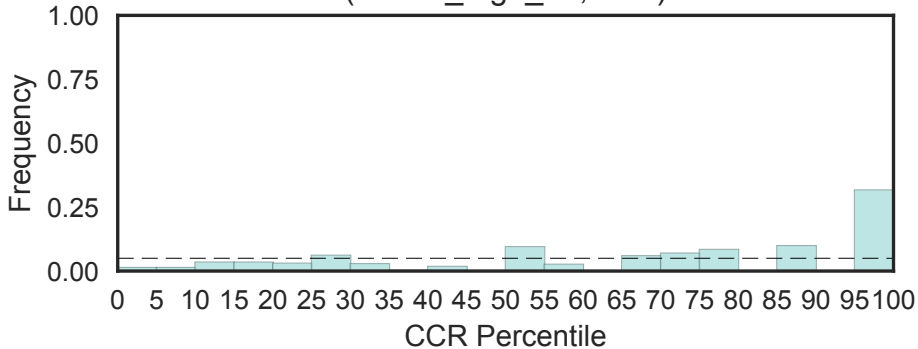

Vacuolar import and degradation protein  
(Vac\_ImportDeg, N=1)

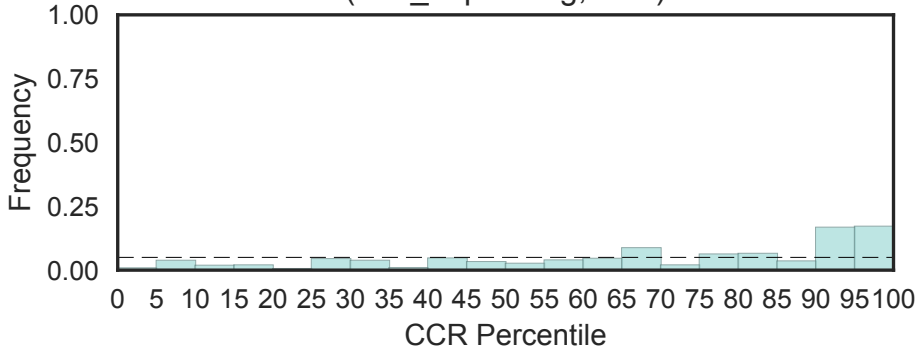

Vascular protein family Vasculin-like 1  
(Vasculin, N=2)

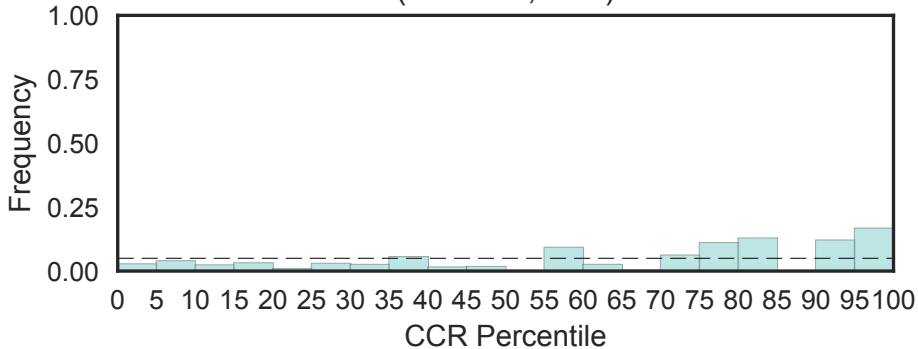

Vasohibin  
(Vasohibin, N=3)

Fisher's OR: 0.693; Bonferroni p-val: 1

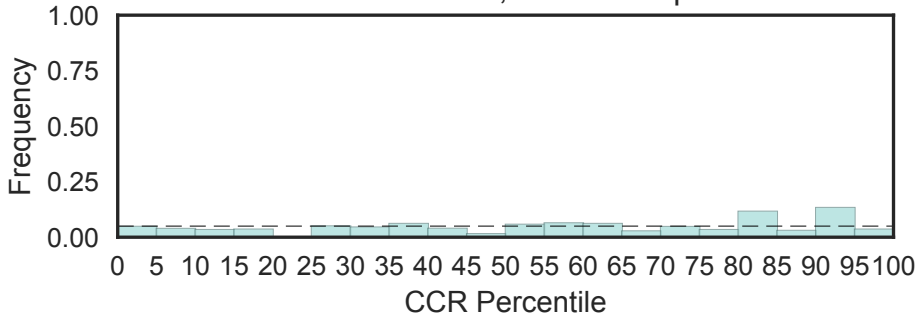

Major Vault Protein repeat  
(Vault, N=5)

Fisher's OR: 0; Bonferroni p-val: 1

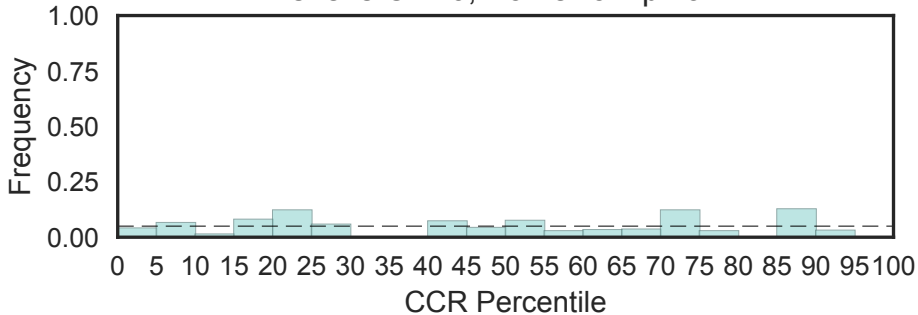

Vertebrate heat shock transcription factor  
(Vert\_HS\_TF, N=2)

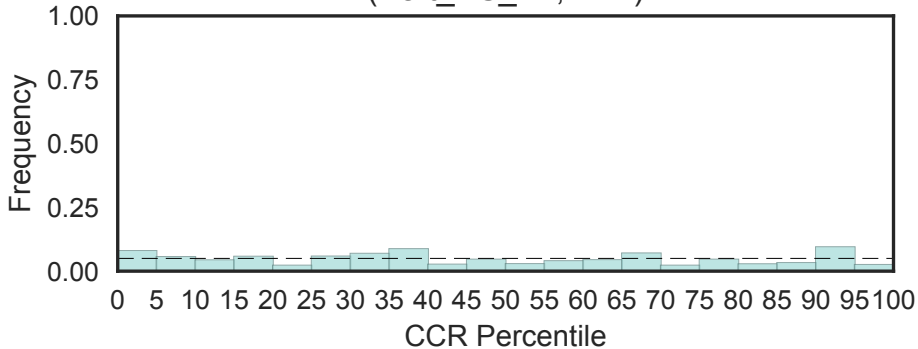



Vertebrate interleukin-3 regulated transcription factor  
(Vert\_IL3-reg\_TF, N=1)

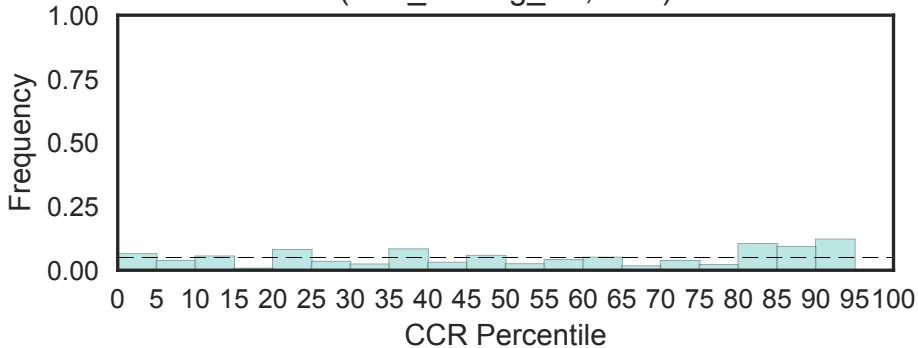

# Mysoin-binding motif of peroxisomes (Vezatin, N=1)

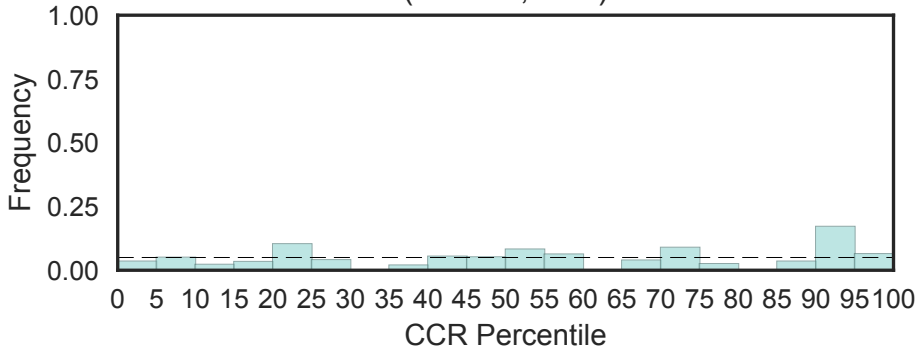

Vestigial/Tondu family  
(Vg\_Tdu, N=2)

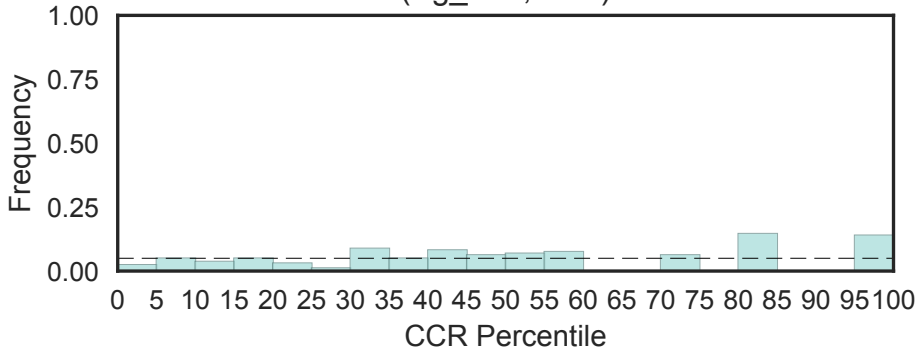

Vinculin family  
(Vinculin, N=14)

Fisher's OR: 1.2; Bonferroni p-val: 1

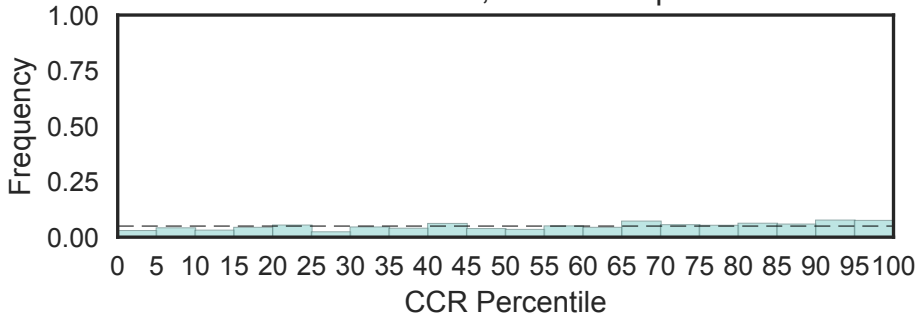

Viral (Superfamily 1) RNA helicase  
(Viral\_helicase1, N=1)

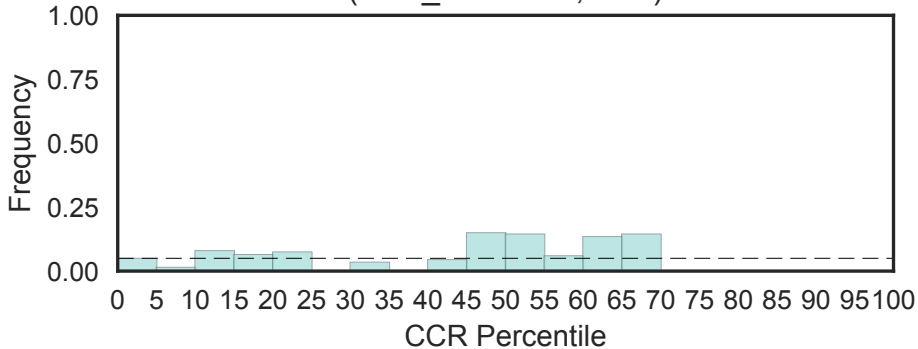

Vitamin D binding protein, domain III  
(VitD-bind\_III, N=1)

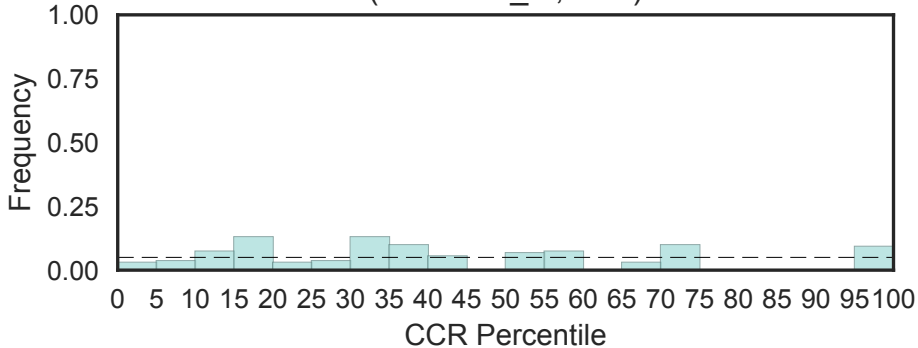

Lipoprotein amino terminal region  
(Vitellogenin\_N, N=2)

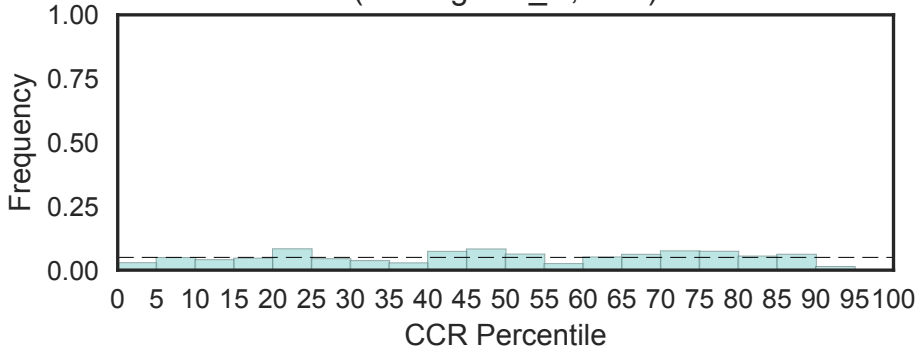

# Endoplasmic reticulum-based factor for assembly of V-ATPase (Vma12, N=1)

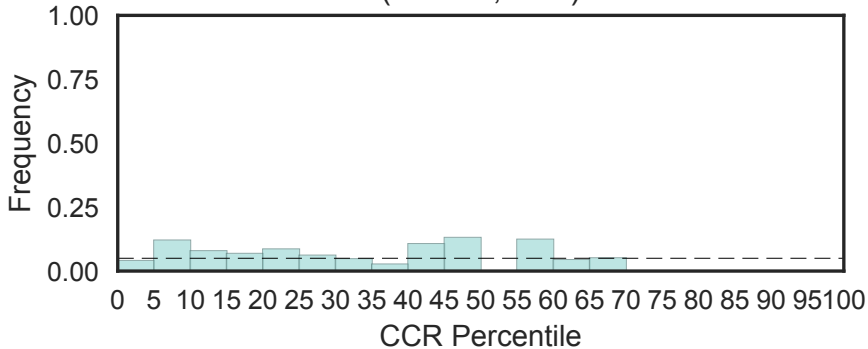



# Regulator of volume decrease after cellular swelling (Voldacs, N=1)

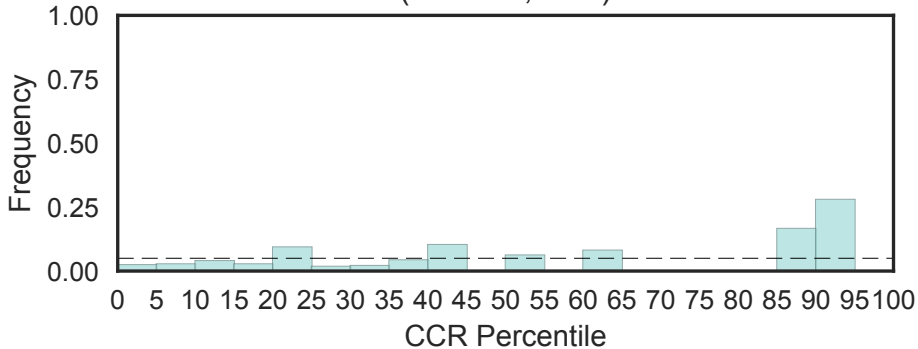

Voltage gated chloride channel  
(Voltage\_CLC, N=9)

Fisher's OR: 0.957; Bonferroni p-val: 1

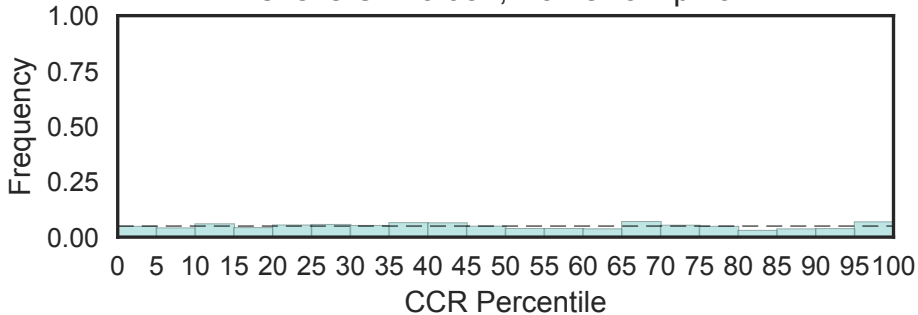

Vps16, C-terminal region  
(Vps16\_C, N=2)

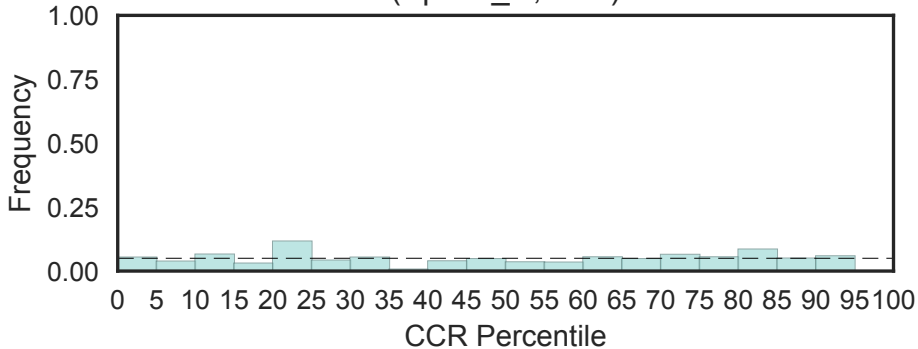

Vps16, N-terminal region  
(Vps16\_N, N=1)

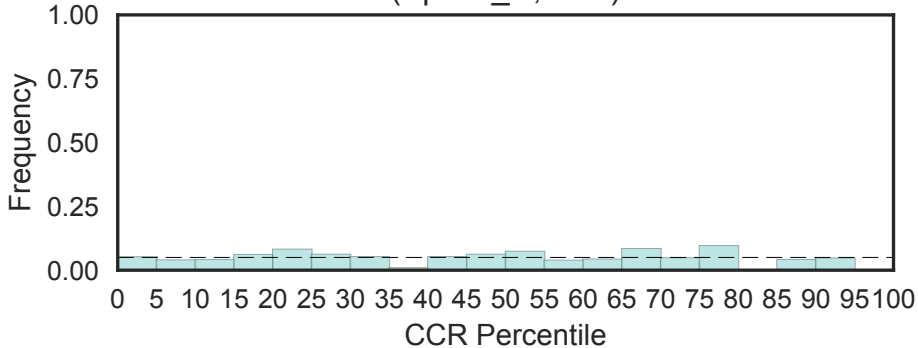

Vps23 core domain  
(Vps23\_core, N=1)

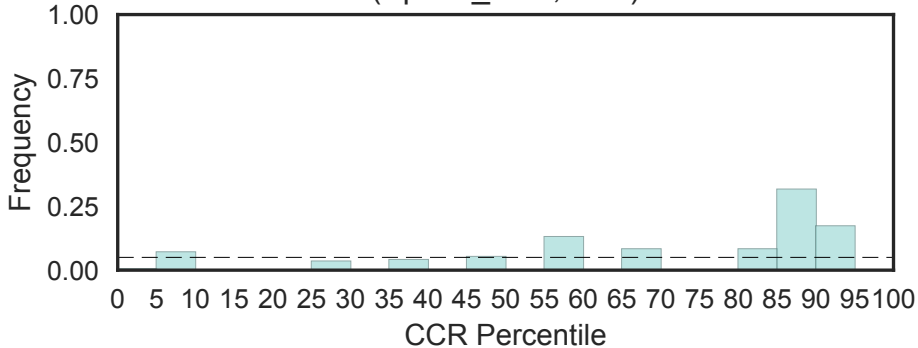

Vacuolar protein sorting-associated protein 26  
(Vps26, N=3)

Fisher's OR: 1.2; Bonferroni p-val: 1

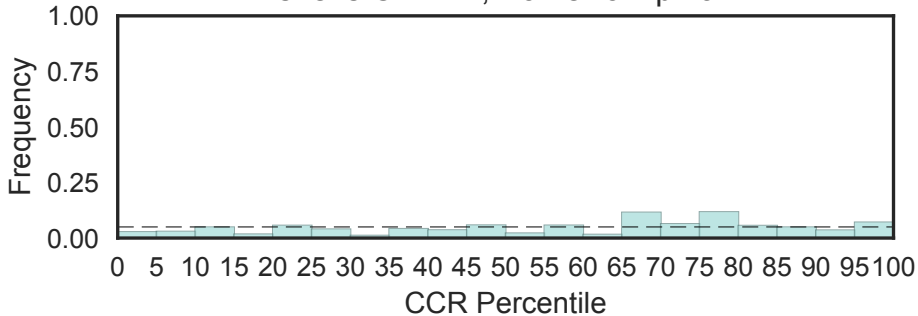

Vacuolar protein sorting-associated protein 35  
(Vps35, N=1)

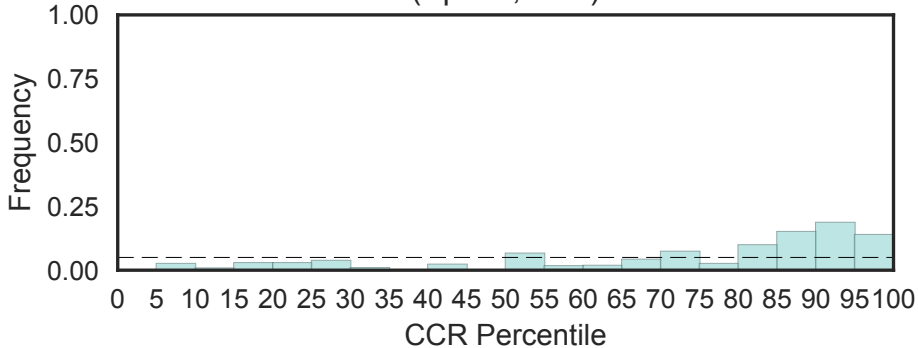

Vacuolar protein sorting protein 36 Vps36  
(Vps36\_ESCRT-II, N=1)

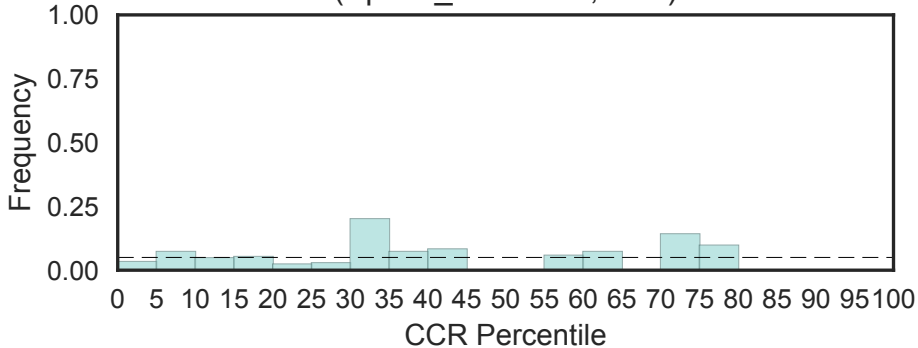



Vacuolar sorting protein 39 domain 1  
(Vps39\_1, N=2)

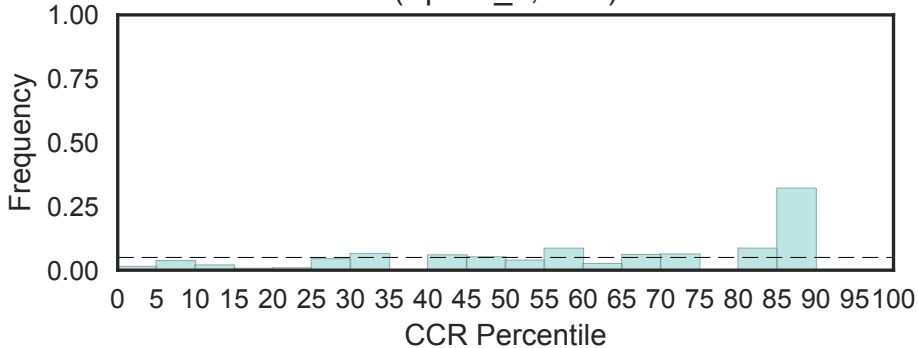

Vacuolar sorting protein 39 domain 2  
(Vps39\_2, N=2)

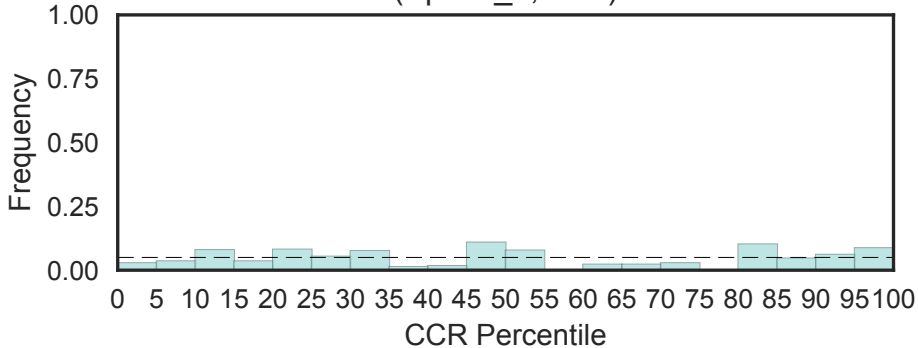

Vps4 C terminal oligomerisation domain  
(Vps4\_C, N=9)

Fisher's OR: 2.87; Bonferroni p-val: 1

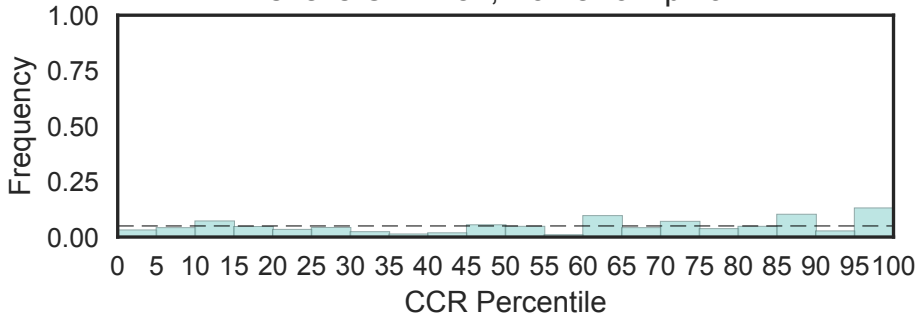

Vps5 C terminal like  
(Vps5, N=6)

Fisher's OR: 0.434; Bonferroni p-val: 1

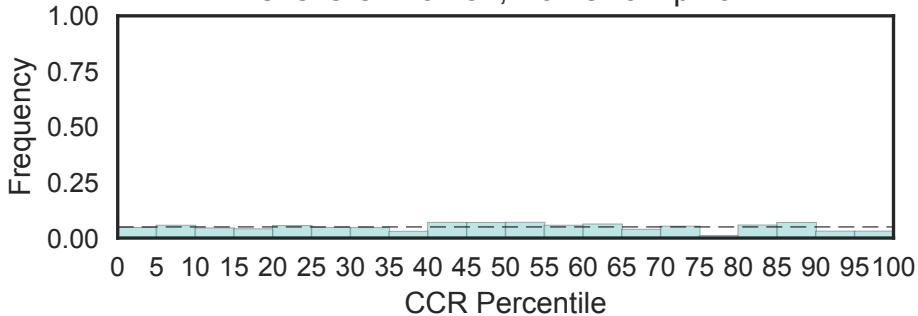

Vps51/Vps67  
(Vps51, N=4)

Fisher's OR: 0.957; Bonferroni p-val: 1

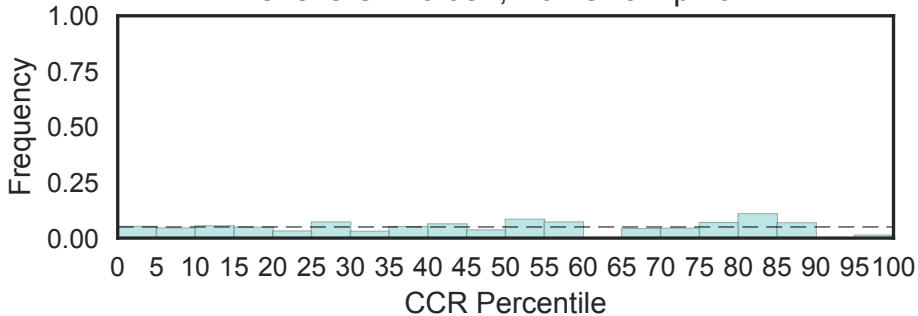

Vps53-like, N-terminal  
(Vps53\_N, N=1)

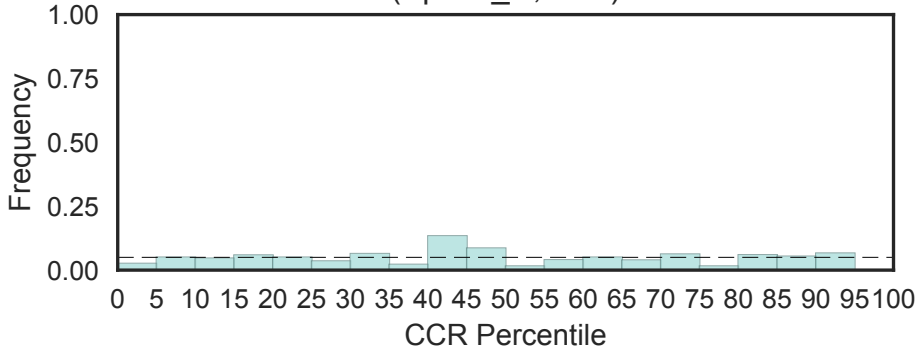

Vps54-like protein  
(Vps54, N=1)

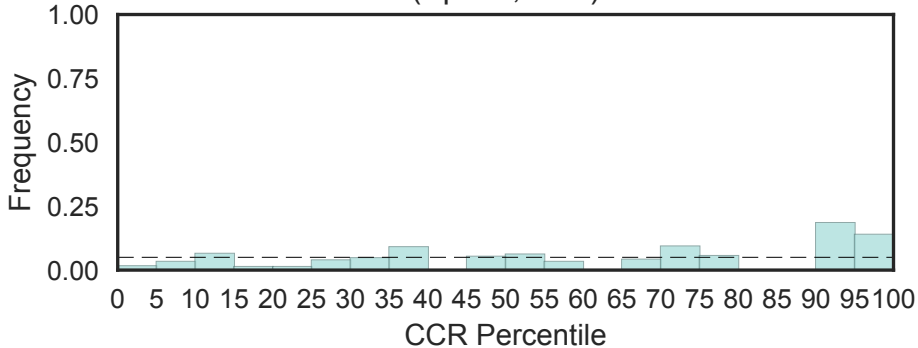

Vacuolar-sorting protein 54, of GARP complex  
(Vps54\_N, N=4)

Fisher's OR: 2.2; Bonferroni p-val: 1

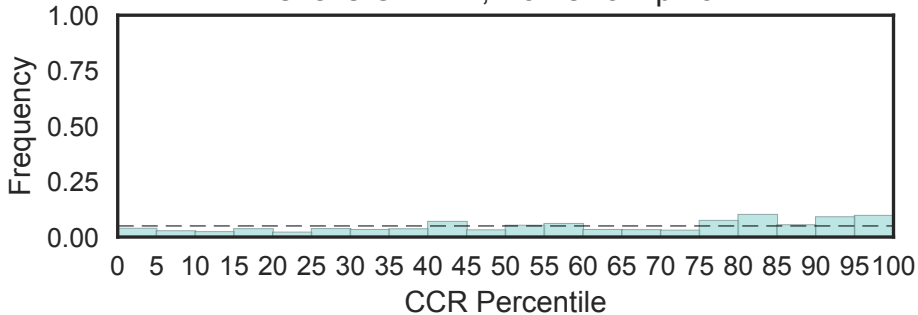



# Vacuolar protein sorting 55

(Vps55, N=3)

Fisher's OR: 0.494; Bonferroni p-val: 1

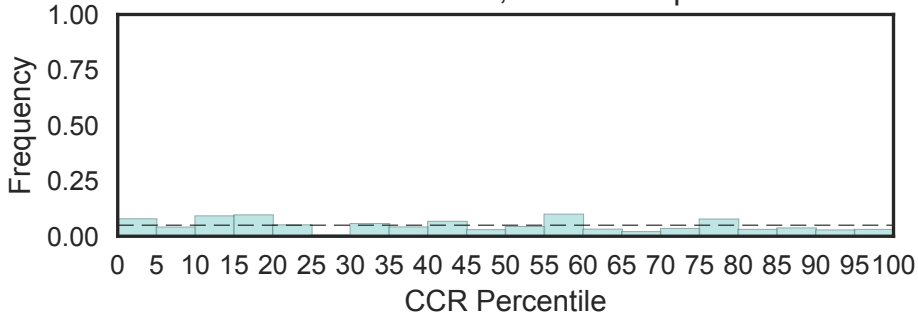

Golgi CORVET complex core vacuolar protein 8  
(Vps8, N=1)

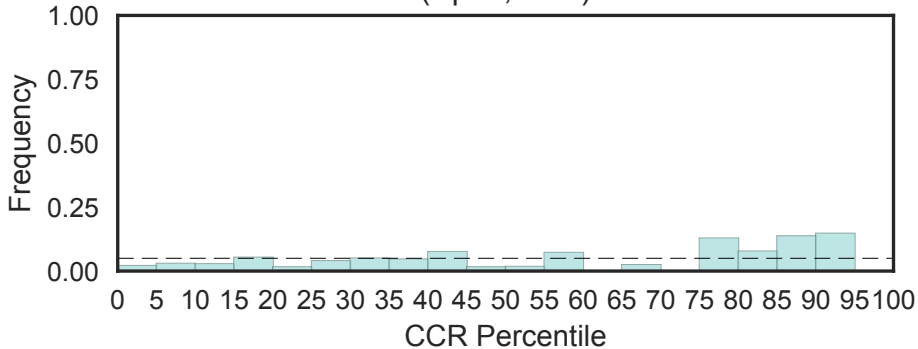

Vta1 like  
(Vta1, N=1)

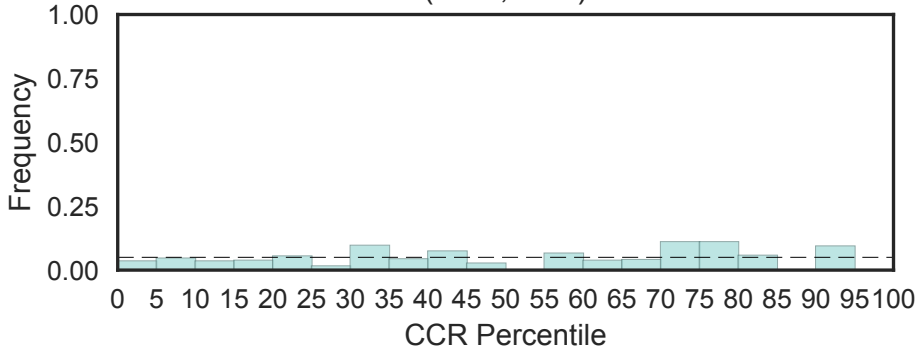

eIF4-gamma/eIF5/eIF2-epsilon  
(W2, N=7)

Fisher's OR: 3.35; Bonferroni p-val: 1

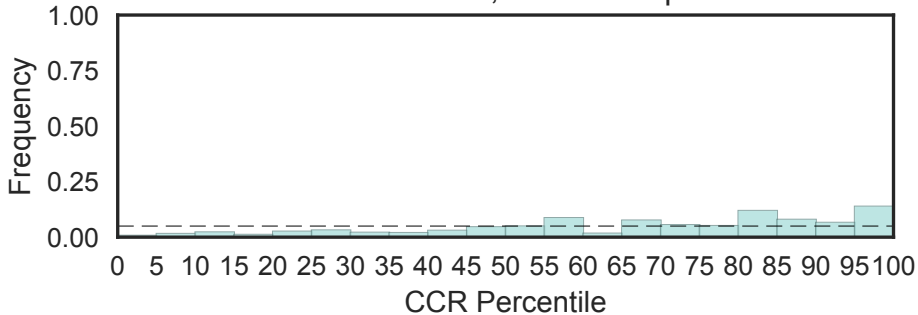

ATP-utilising chromatin assembly and remodelling N-terminal  
(WAC\_Acf1\_DNA\_bd, N=2)

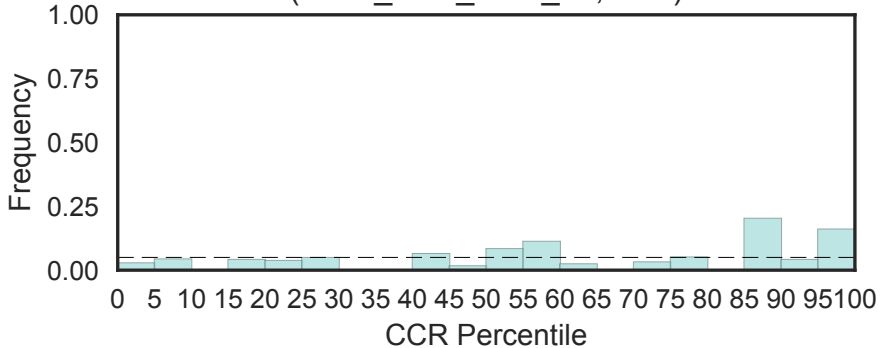

WAP-type (Whey Acidic Protein) 'four-disulfide core'  
(WAP, N=25)

Fisher's OR: 0.251; Bonferroni p-val: 1

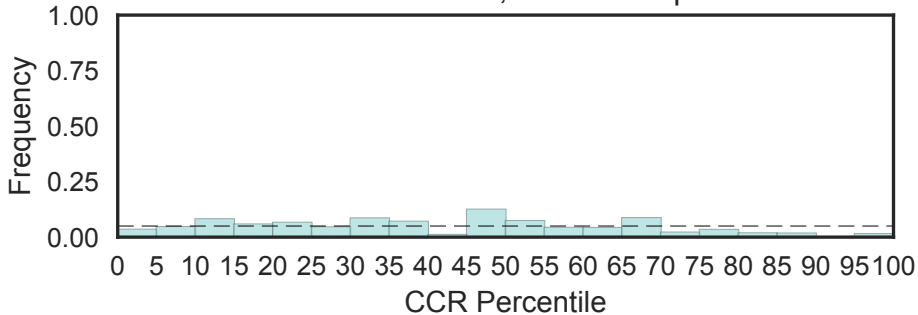

# Wings apart-like protein regulation of heterochromatin (WAPL, N=1)

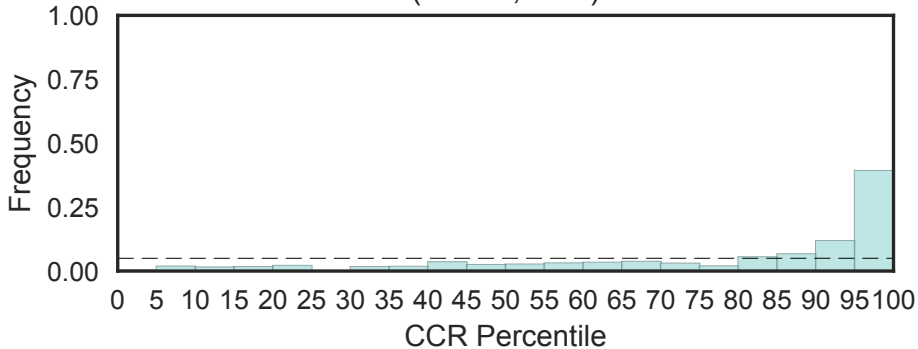

WASH complex subunit 7, C-terminal  
(WASH-7\_C, N=1)

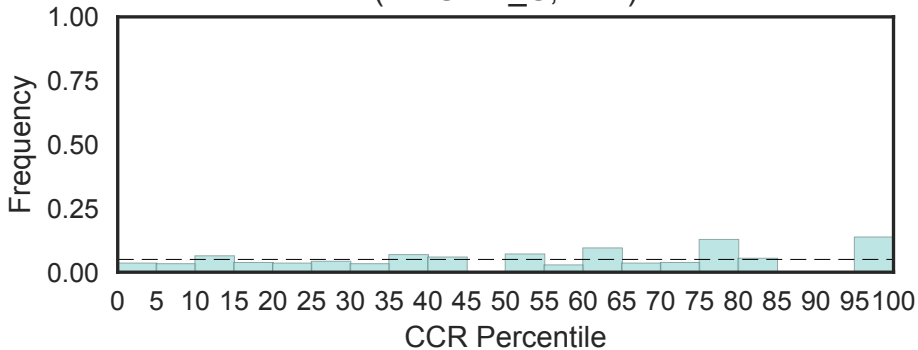



WASH complex subunit 7, N-terminal  
(WASH-7\_N, N=1)

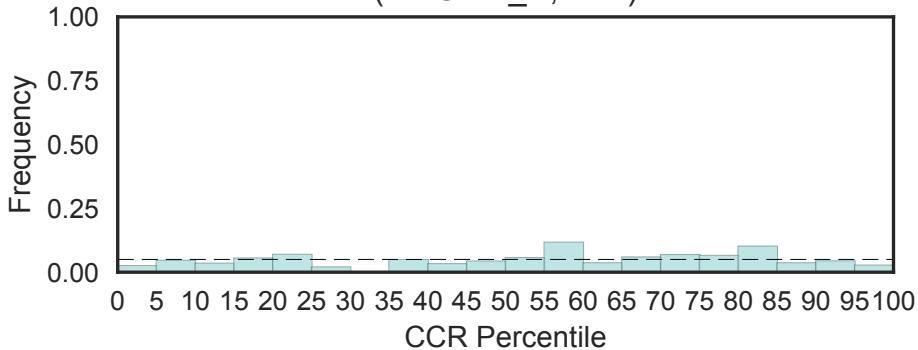

WASH complex subunit 7  
(WASH-7\_mid, N=1)

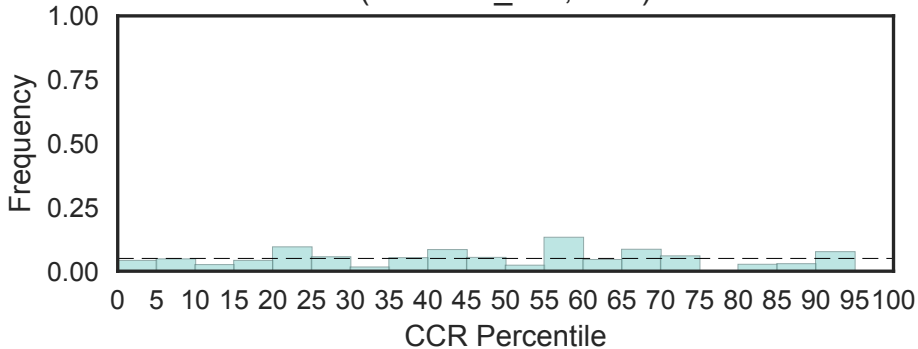

WW domain-binding protein 1  
(WBP-1, N=3)

Fisher's OR: 0; Bonferroni p-val: 1

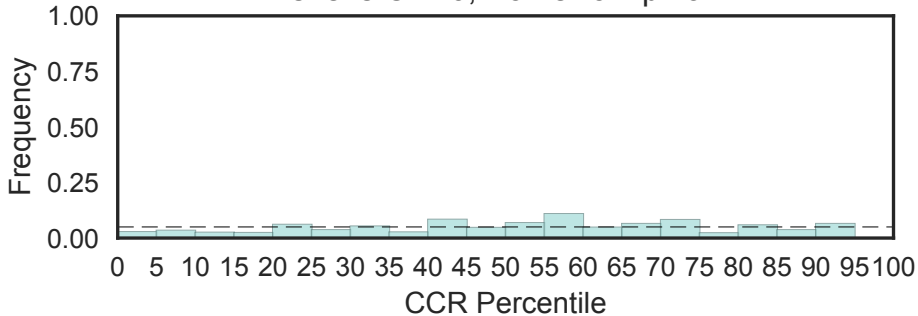

# Williams-Beuren syndrome chromosomal region 28 protein homologue (WBS28, N=1)

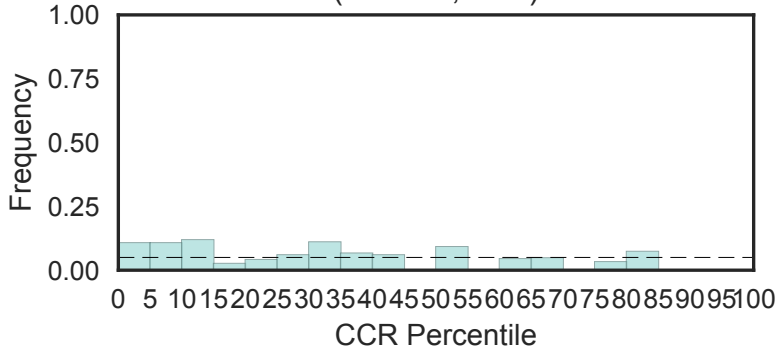

# Methyltransferase involved in Williams-Beuren syndrome (WBS\_methylT, N=2)

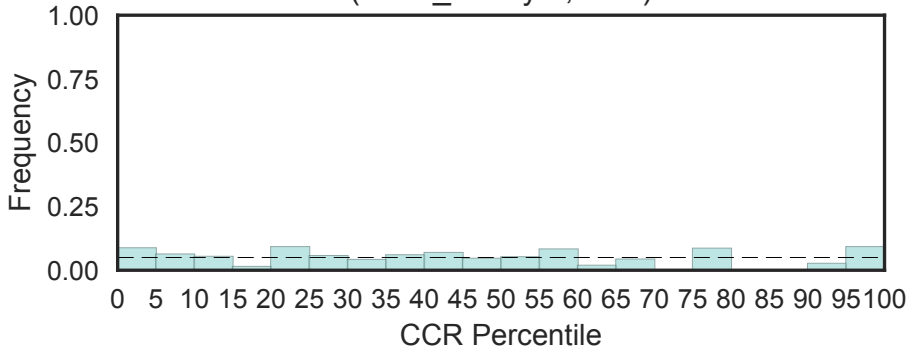

WD-repeat region  
(WD-3, N=1)

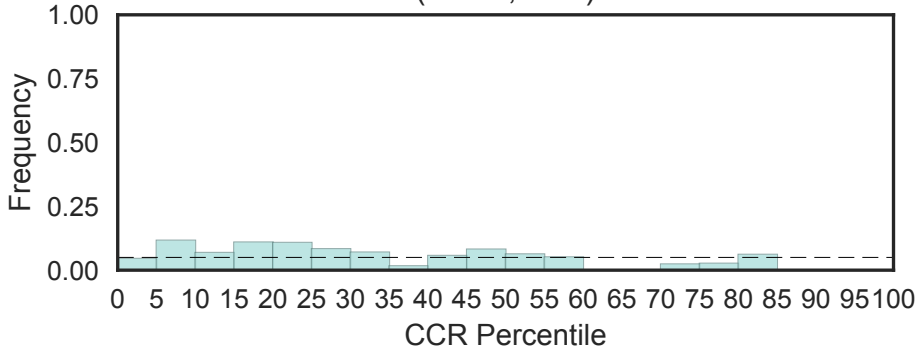

WD domain, G-beta repeat  
(WD40, N=770)

Fisher's OR: 2.29; Bonferroni p-val: 6.71e-20

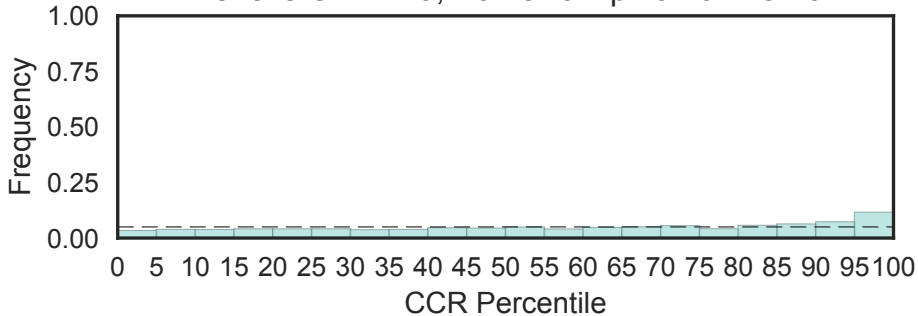

WD domain, G-beta repeat  
(WD40\_3, N=1)

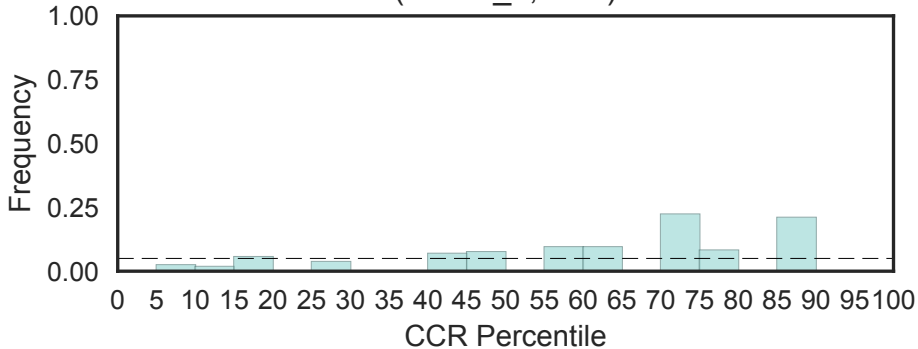



Type of WD40 repeat  
(WD40\_4, N=10)

Fisher's OR: 0.667; Bonferroni p-val: 1

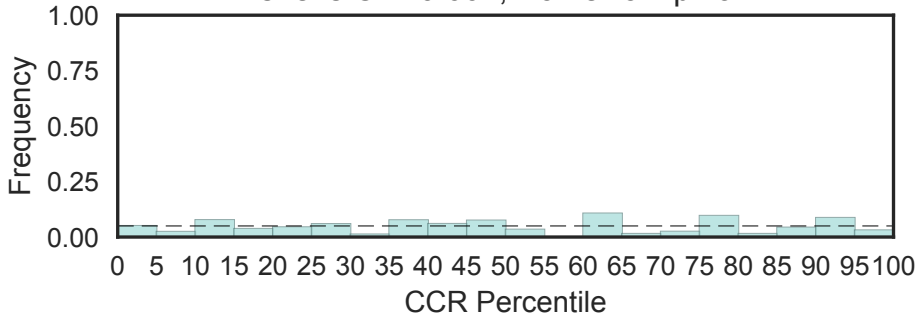

Alternative WD40 repeat motif  
(WD40\_alt, N=1)

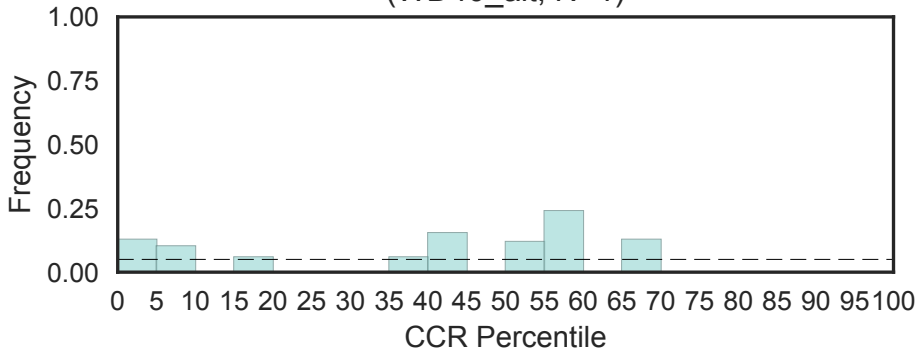

WD repeat and coiled-coil-containing protein family  
(WDCP, N=1)

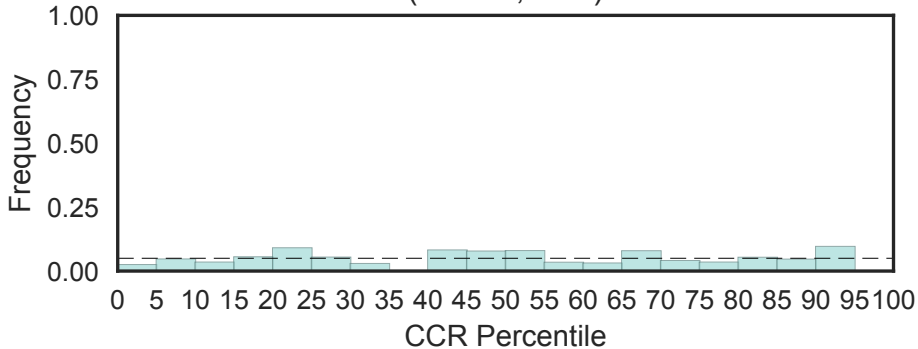

WGR domain  
(WGR, N=3)

Fisher's OR: 0; Bonferroni p-val: 1

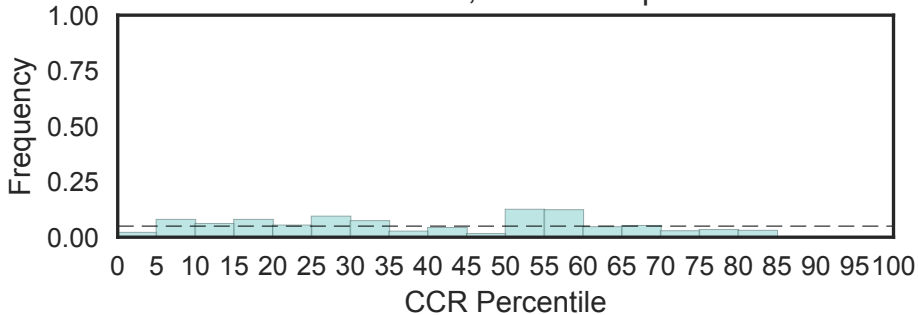

WG containing repeat  
(WG\_beta\_rep, N=1)

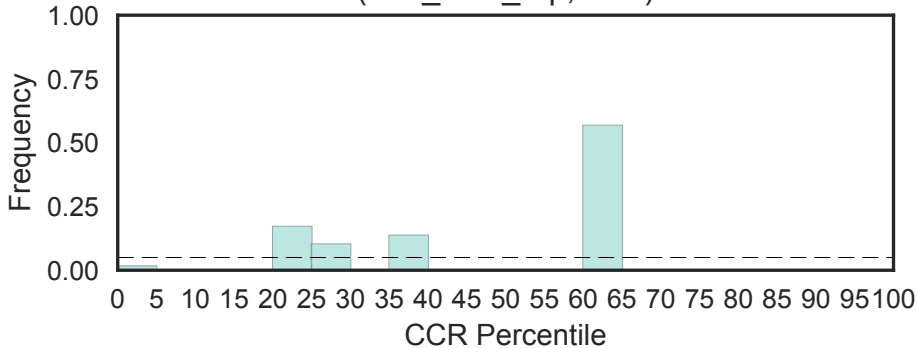

WH1 domain  
(WH1, N=10)

Fisher's OR: 4.04; Bonferroni p-val: 1

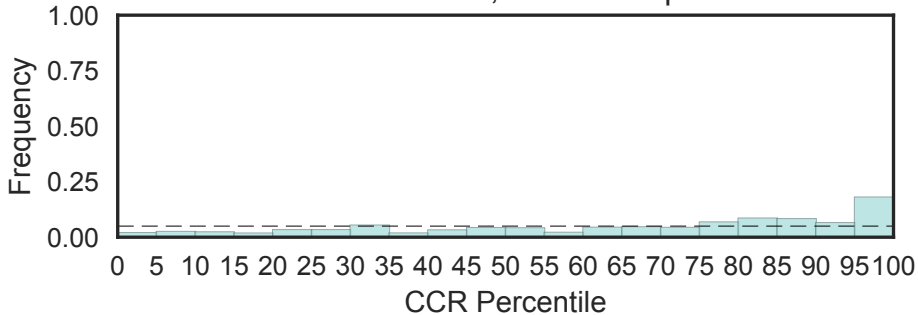

WH2 motif  
(WH2, N=21)

Fisher's OR: 1.13; Bonferroni p-val: 1

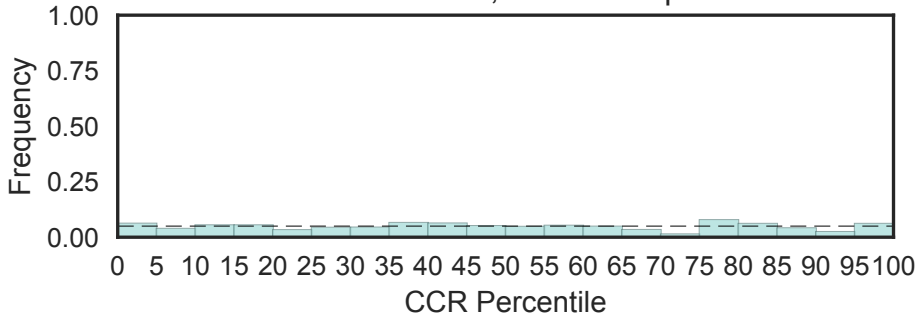

WHEP-TRS domain  
(WHEP-TRS, N=7)

Fisher's OR: 0; Bonferroni p-val: 1

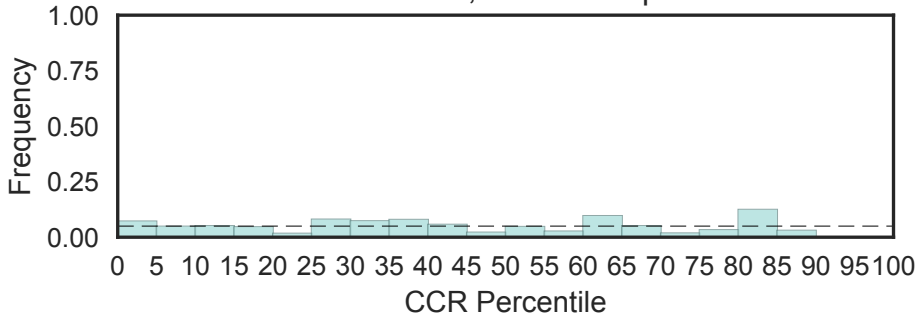



WSTF, HB1, Itc1p, MBD9 motif 1  
(WHIM1, N=5)

Fisher's OR: 4.41; Bonferroni p-val: 1

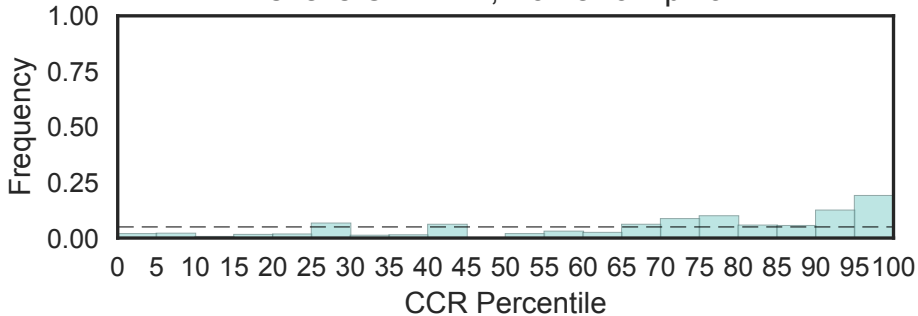

WIF domain  
(WIF, N=2)

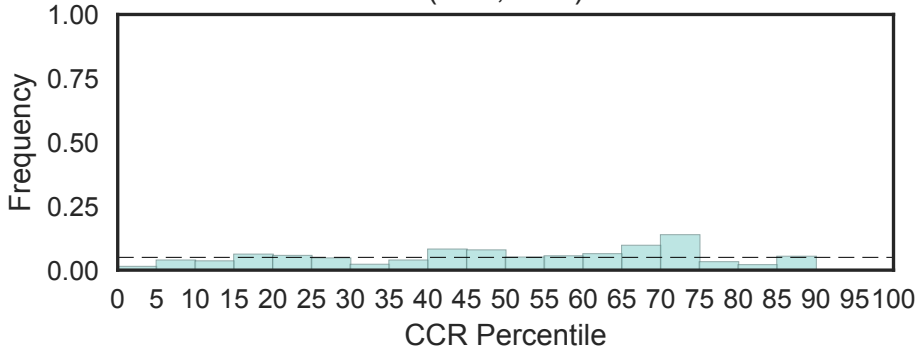

Putative WW-binding domain and destruction box  
(WRNPLPNID, N=4)

Fisher's OR: 0; Bonferroni p-val: 1

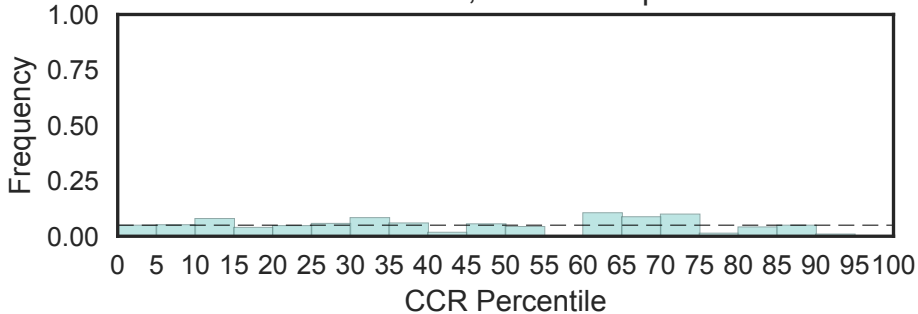

Mitochondrial F1F0-ATP synthase, subunit f  
(WRW, N=3)

Fisher's OR: 0; Bonferroni p-val: 1

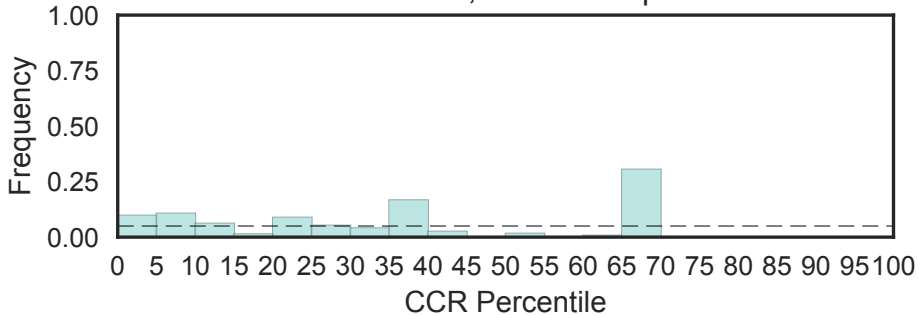

WSC domain  
(WSC, N=7)

Fisher's OR: 0; Bonferroni p-val: 1

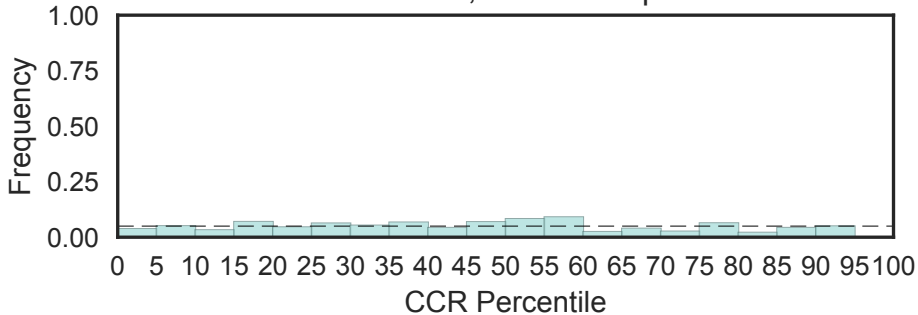

Williams-Beuren syndrome DDT (WSD), D-TOX E motif  
(WSD, N=6)

Fisher's OR: 2.68; Bonferroni p-val: 1

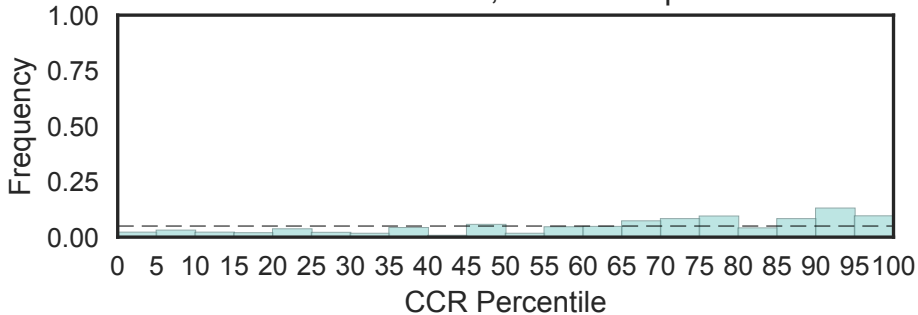

WSK motif  
(WSK, N=4)

Fisher's OR: 0; Bonferroni p-val: 1

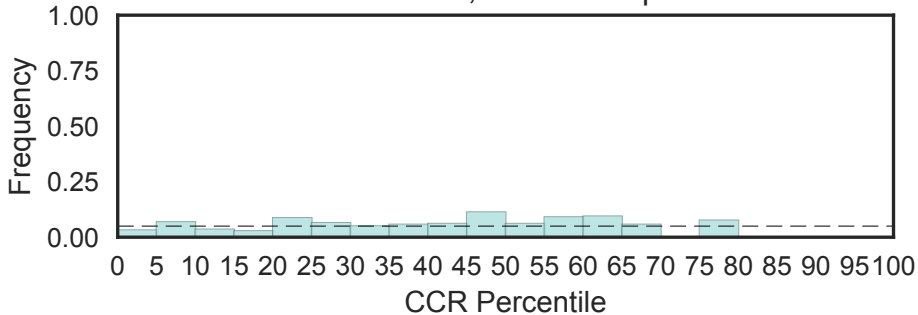

Wilm's tumour protein  
(WT1, N=1)

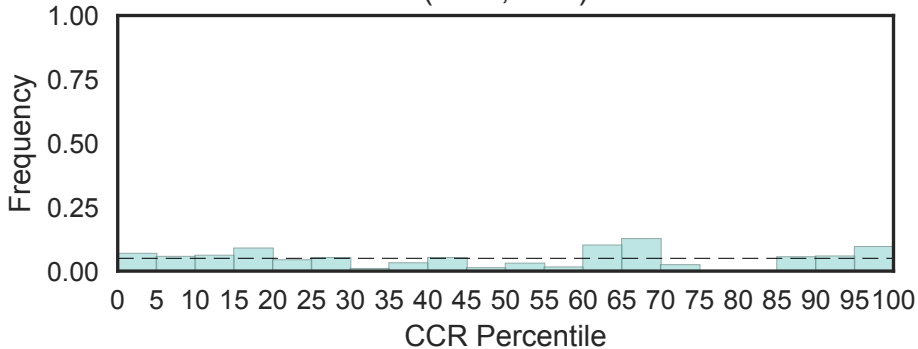



WTX protein  
(WTX, N=2)

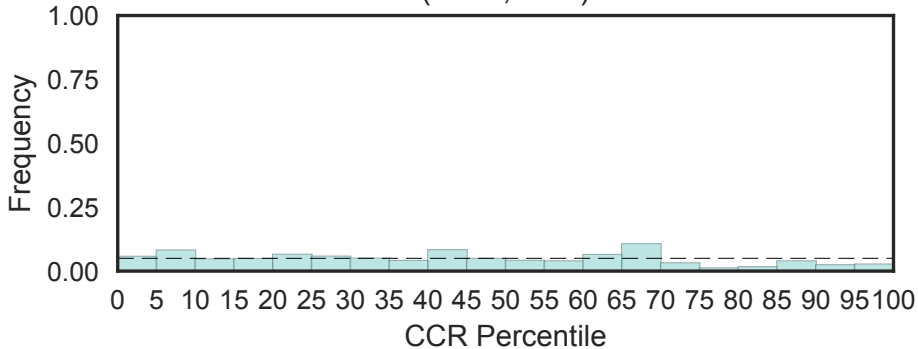

WW domain  
(WW, N=67)

Fisher's OR: 2.74; Bonferroni p-val: 1

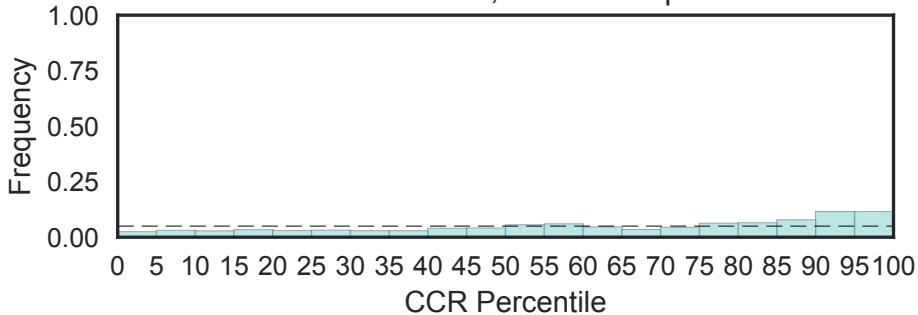

WWE domain  
(WWE, N=12)

Fisher's OR: 0.897; Bonferroni p-val: 1

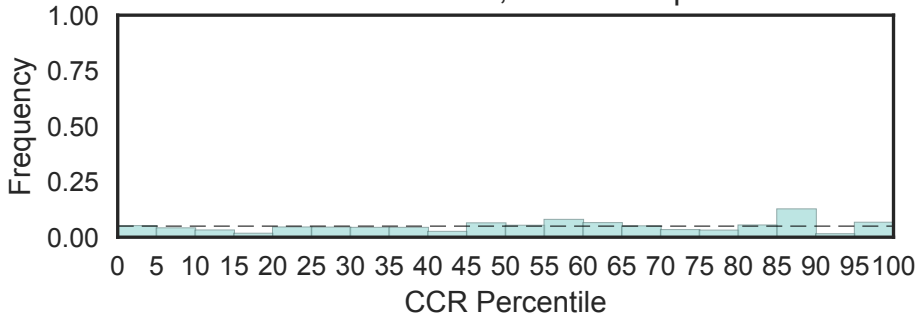

Unstructured linker region between on GAS7 protein  
(WW\_FCH\_linker, N=1)

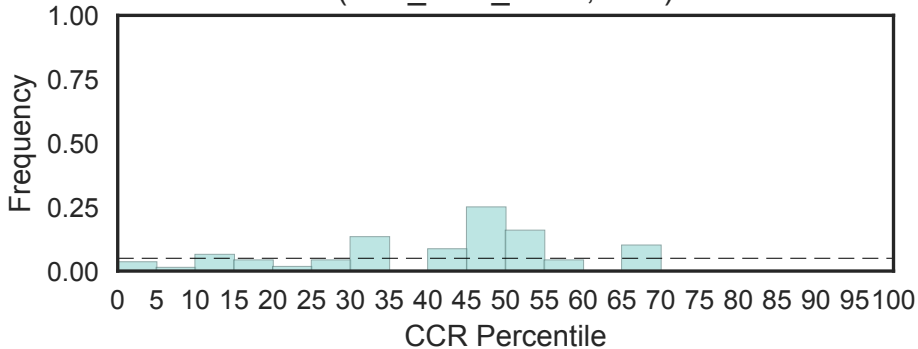

WW domain binding protein 11  
(Wbp11, N=1)

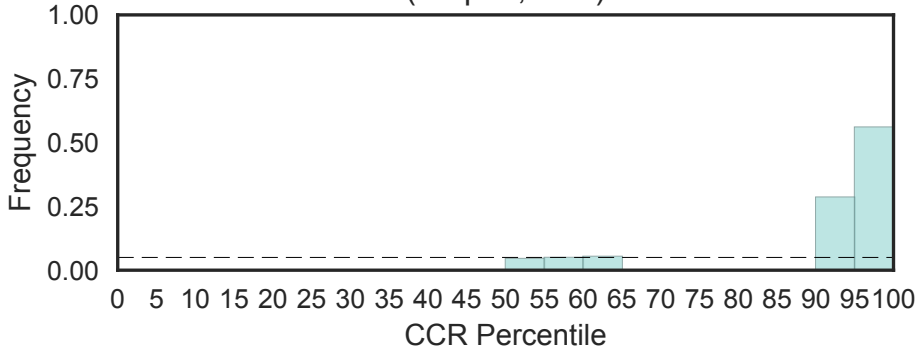

WTAP/Mum2p family  
(Wtap, N=2)

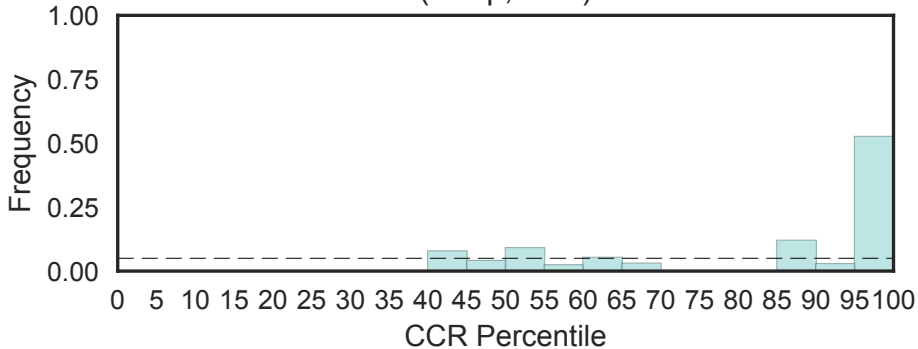

XAP5, circadian clock regulator  
(XAP5, N=1)

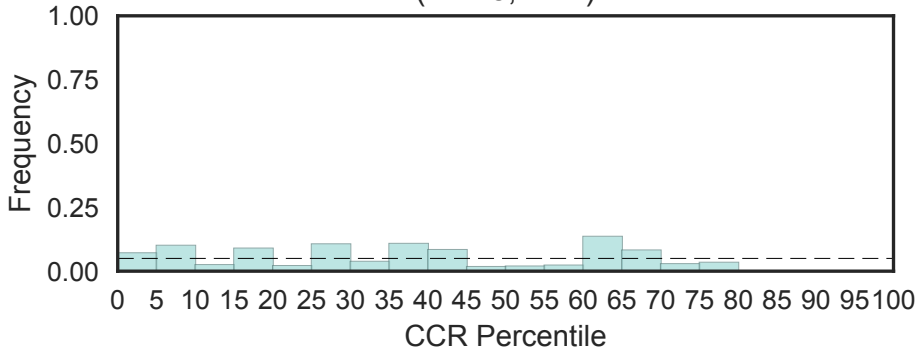

XK-related protein  
(XK-related, N=9)

Fisher's OR: 0.633; Bonferroni p-val: 1

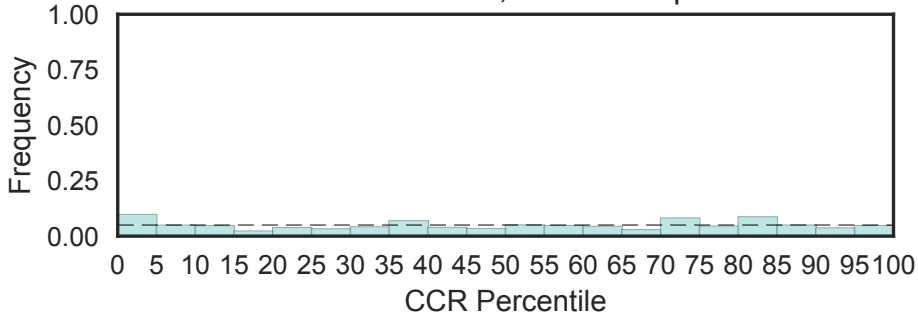



XLF-Cernunnos, XRcc4-like factor, NHEJ component  
(XLF, N=1)

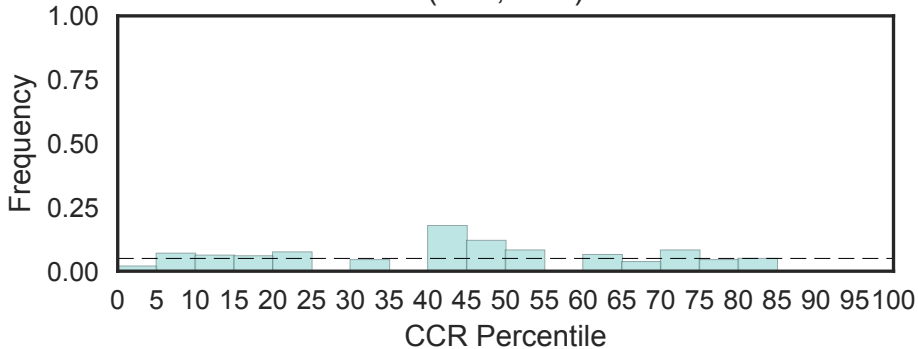

XPA protein C-terminus  
(XPA\_C, N=1)

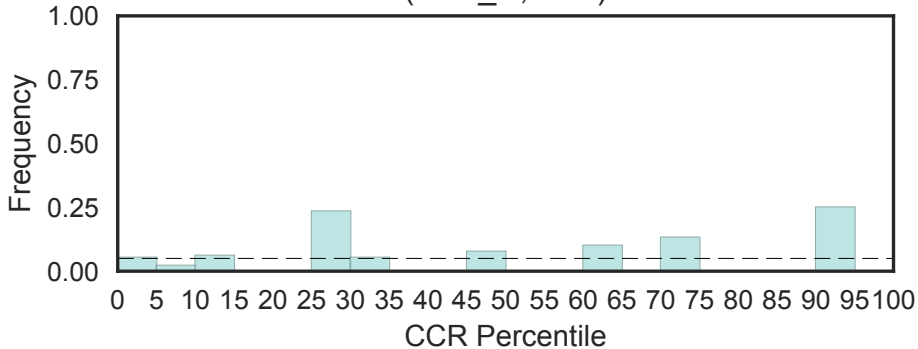

XPA protein N-terminal  
(XPA\_N, N=1)

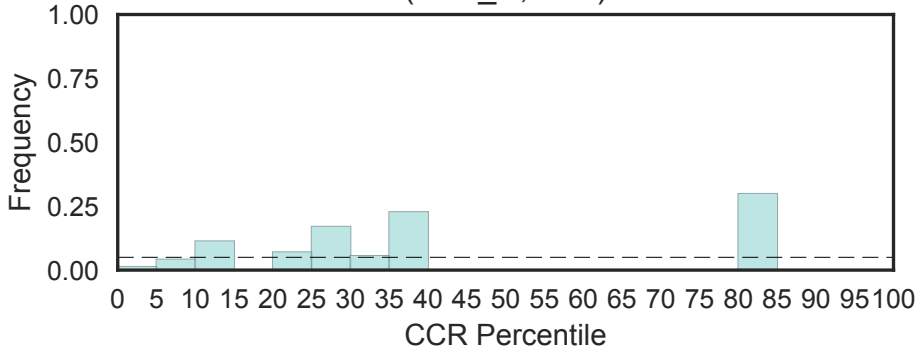

XPC-binding domain  
(XPC-binding, N=2)

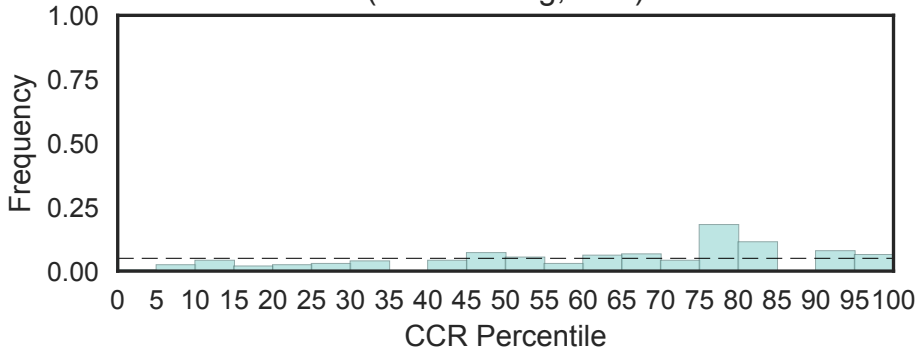

XPG I-region  
(XPG\_I, N=5)

Fisher's OR: 0; Bonferroni p-val: 1

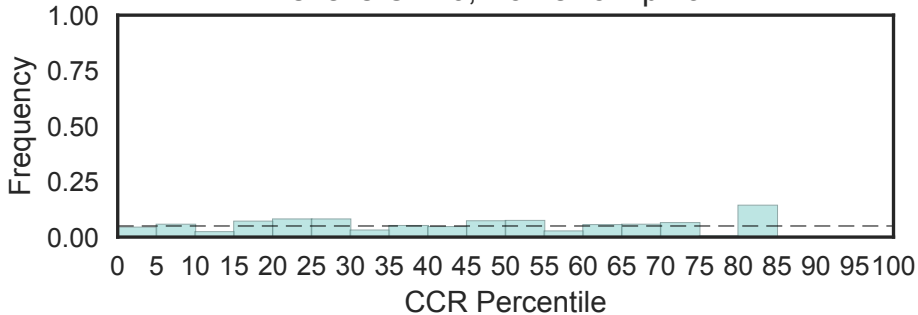

XPG domain containing  
(XPG\_I\_2, N=1)

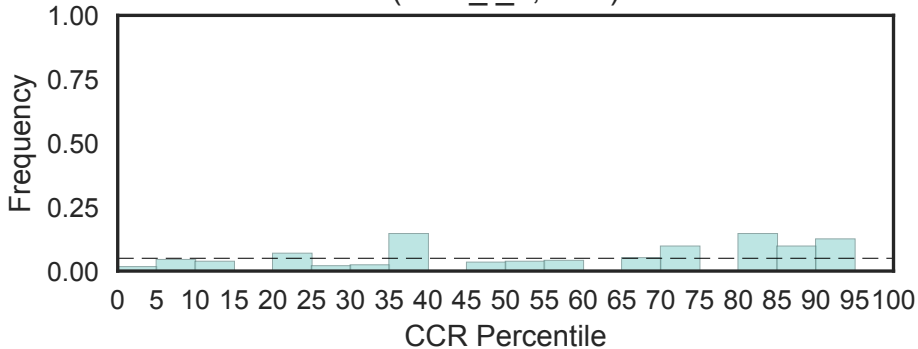

XPG N-terminal domain  
(XPG\_N, N=6)

Fisher's OR: 0; Bonferroni p-val: 1

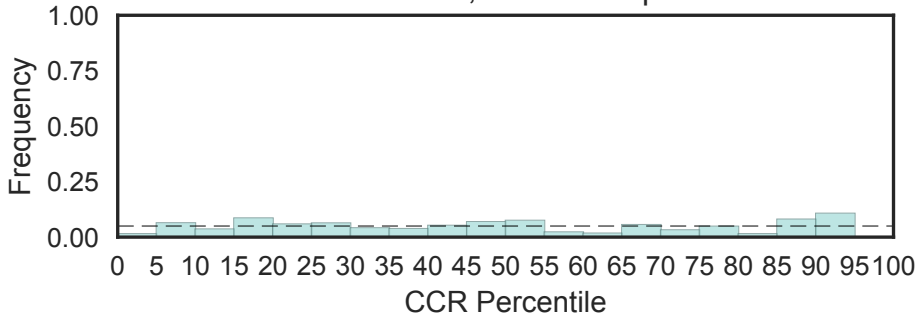

XRCC1 N terminal domain  
(XRCC1\_N, N=3)

Fisher's OR: 0; Bonferroni p-val: 1

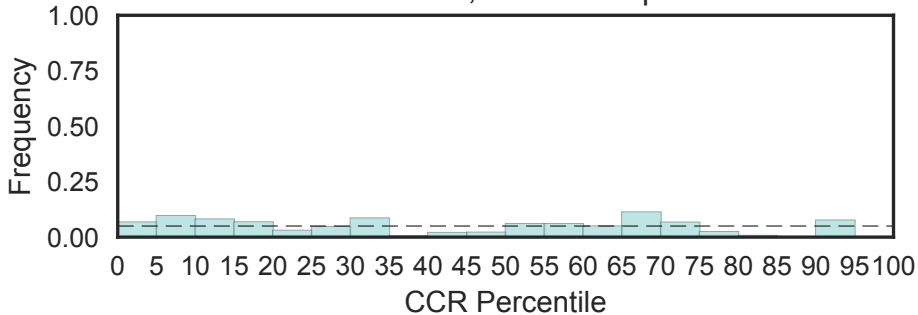



# DNA double-strand break repair and V(D)J recombination protein XRCC4 (XRCC4, N=1)

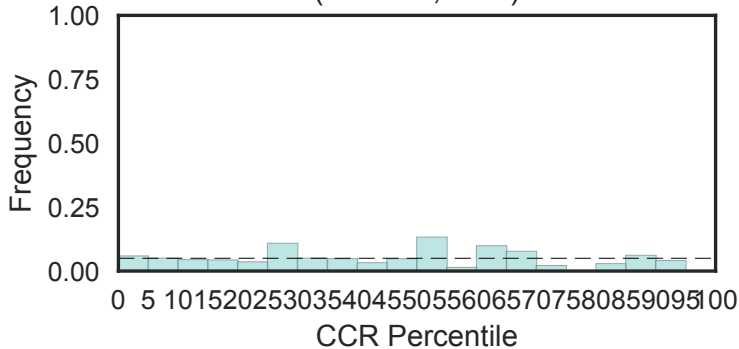

XRN 5'-3' exonuclease N-terminus  
(XRN\_N, N=2)

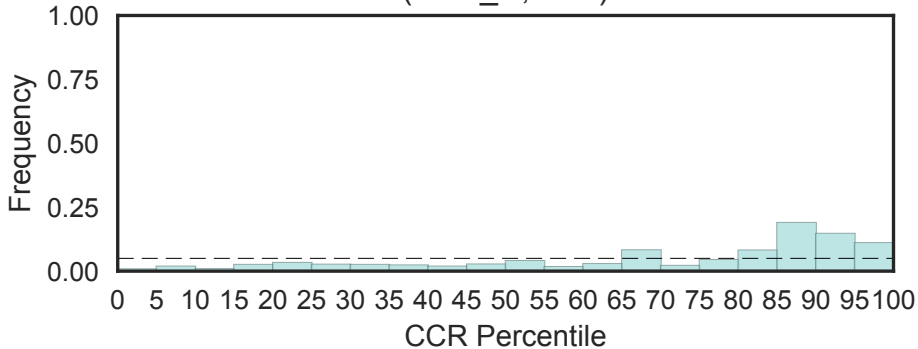

# XRN-Two Binding Domain, XTBD (XTBD, N=2)

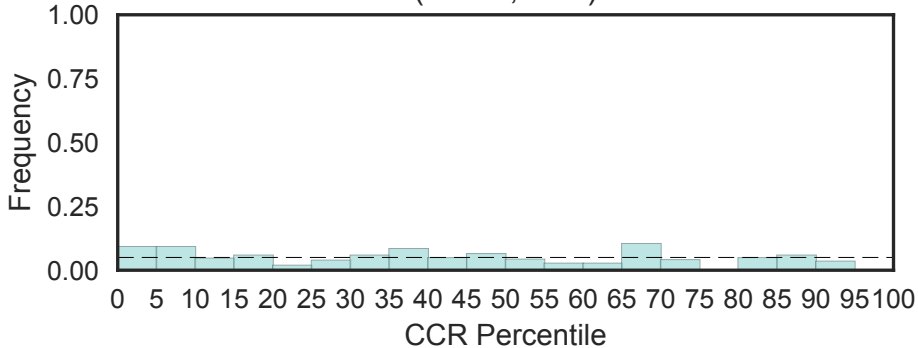

Permease family  
(Xan\_ur\_permease, N=4)  
Fisher's OR: 3.05; Bonferroni p-val: 1

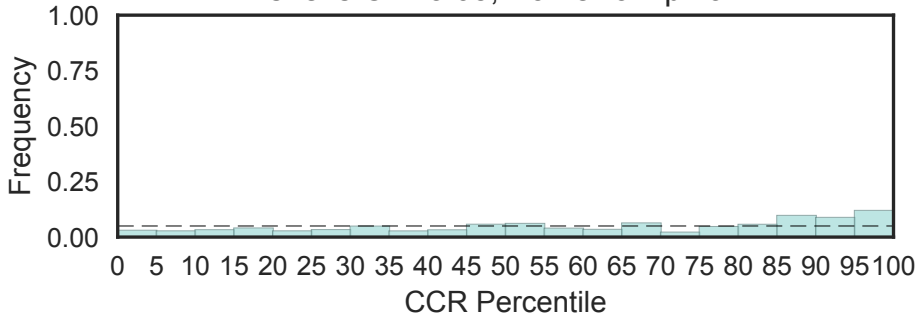

# Endoribonuclease XendoU (XendoU, N=1)

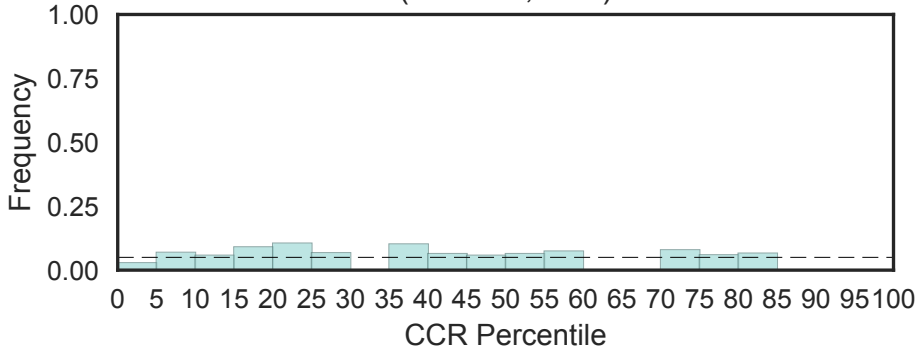

Xin repeat  
(Xin, N=28)

Fisher's OR: 1.01; Bonferroni p-val: 1

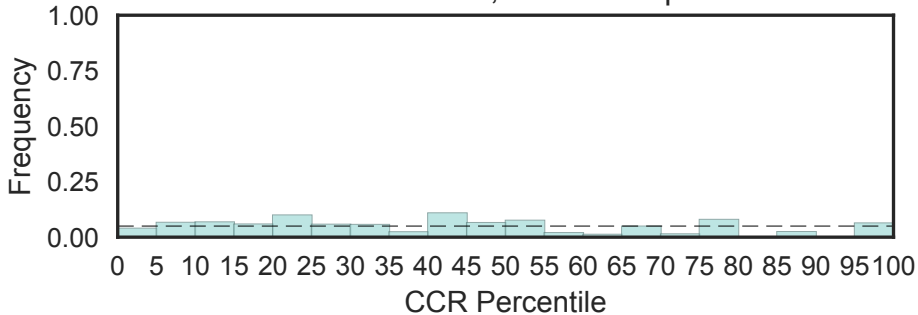

Extracellular link domain  
(Xlink, N=24)

Fisher's OR: 0.927; Bonferroni p-val: 1

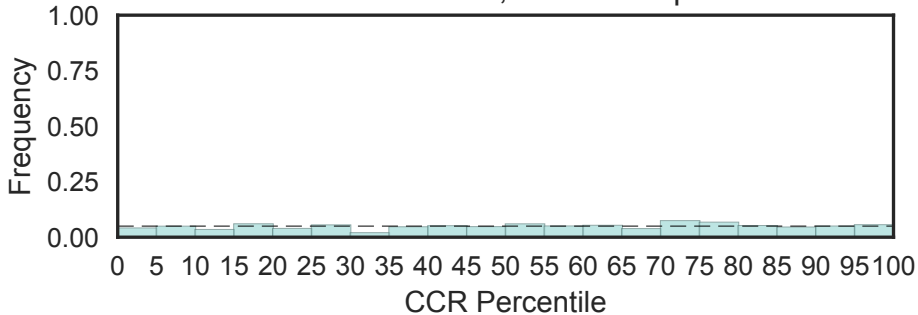

Exportin 1-like protein  
(Xpo1, N=7)

Fisher's OR: 4.13; Bonferroni p-val: 1

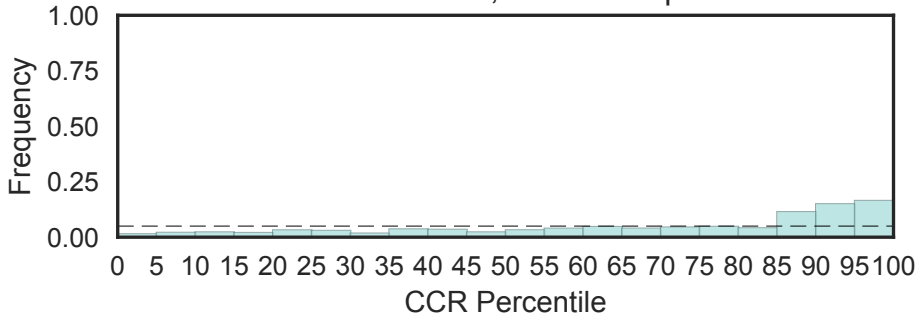



Xylosyltransferase C terminal  
(Xylo\_C, N=2)

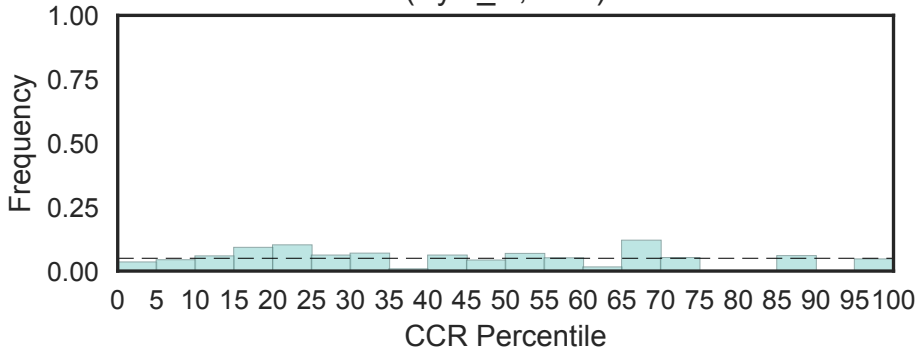

Yaf2/RYBP C-terminal binding motif  
(YAF2\_RYBP, N=2)

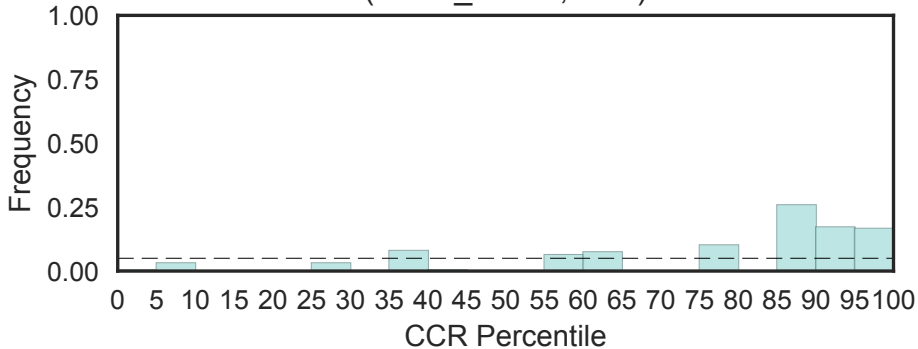

YEATS family  
(YEATS, N=4)

Fisher's OR: 20.7; Bonferroni p-val: 1.42e-05

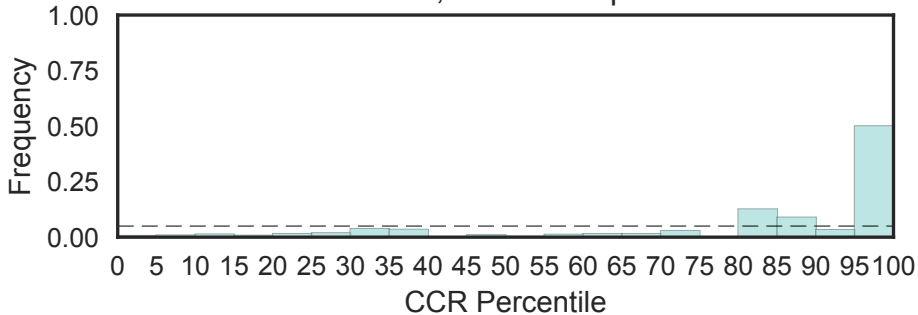

YIF1  
(YIF1, N=2)

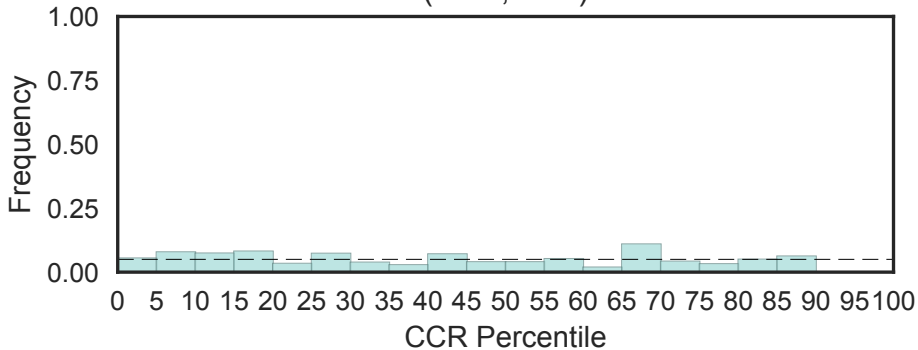

YL1 nuclear protein  
(YL1, N=2)

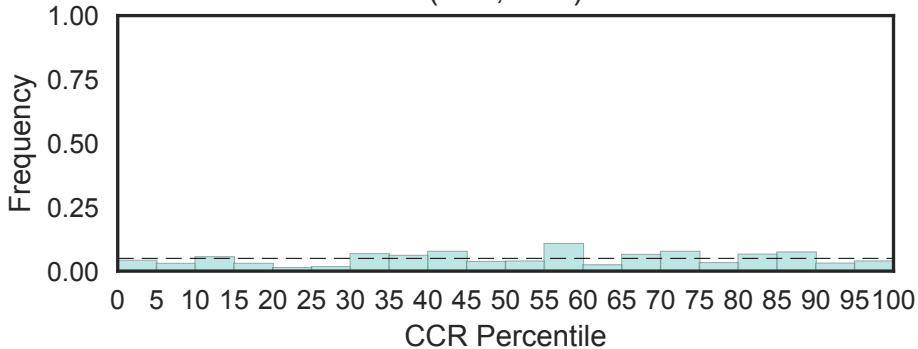

YL1 nuclear protein C-terminal domain  
(YL1\_C, N=2)

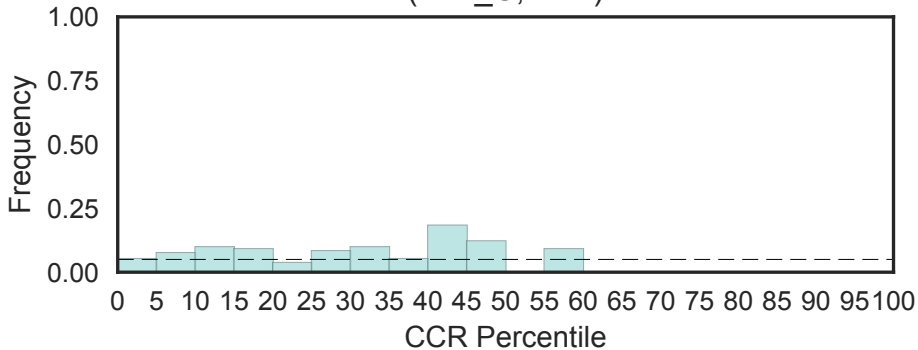

YT521-B-like domain  
(YTH, N=5)

Fisher's OR: 4; Bonferroni p-val: 1

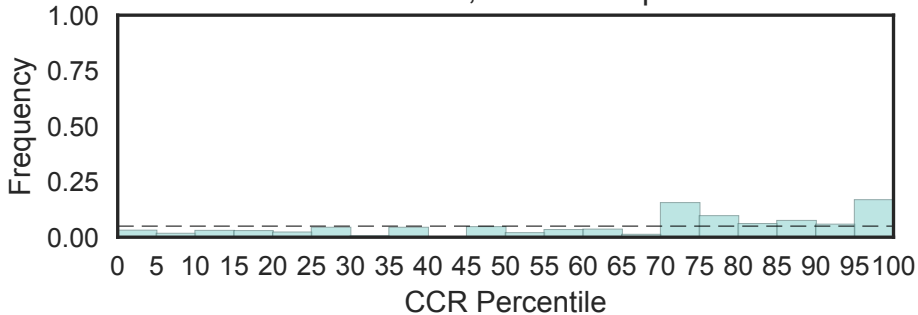

Protein-tyrosine phosphatase  
(Y\_phosphatase, N=68)  
Fisher's OR: 1.14; Bonferroni p-val: 1

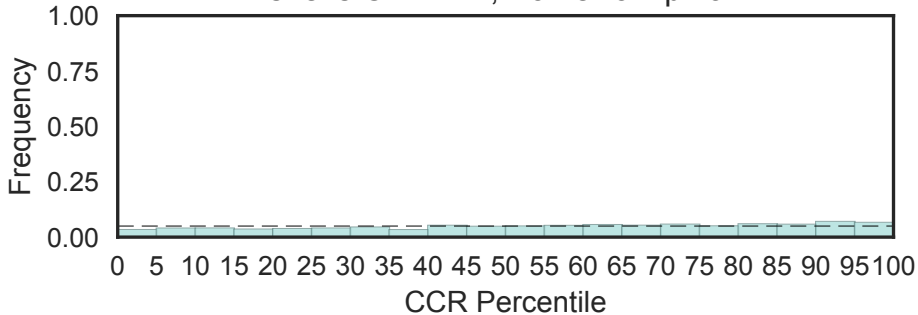



Tyrosine phosphatase family  
(Y\_phosphatase3, N=3)  
Fisher's OR: 0; Bonferroni p-val: 1

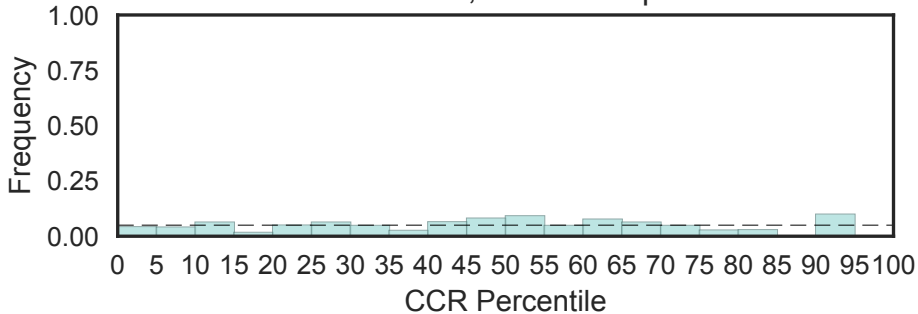

Essential protein Yae1, N terminal  
(Yae1\_N, N=2)

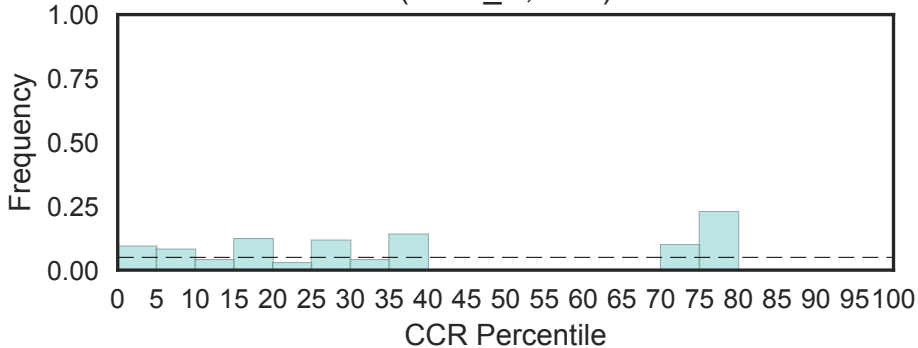

# Hemimethylated DNA-binding protein YccV like (YccV-like, N=2)

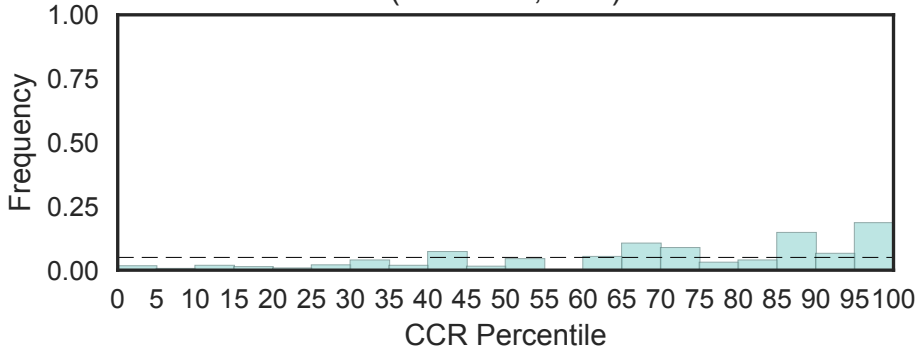

Protein of unknown function (DUF933)  
(YchF-GTPase\_C, N=1)

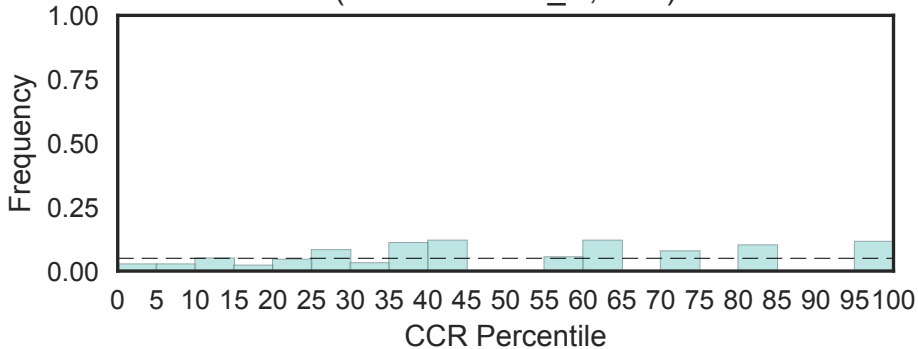

YdjC-like protein  
(YdjC, N=1)

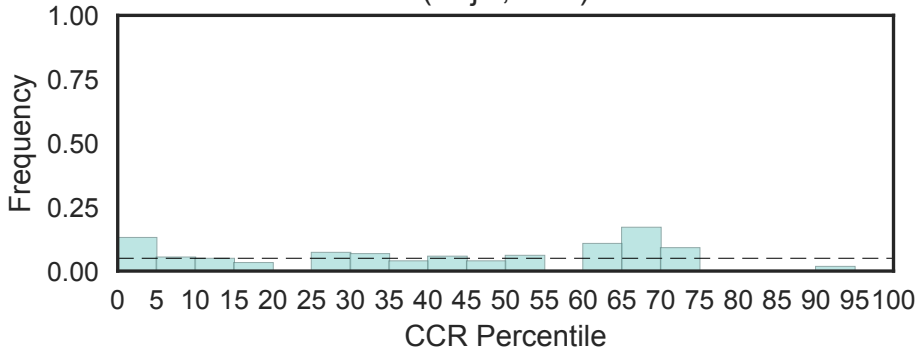

YhhN family  
(YhhN, N=3)

Fisher's OR: 0; Bonferroni p-val: 1

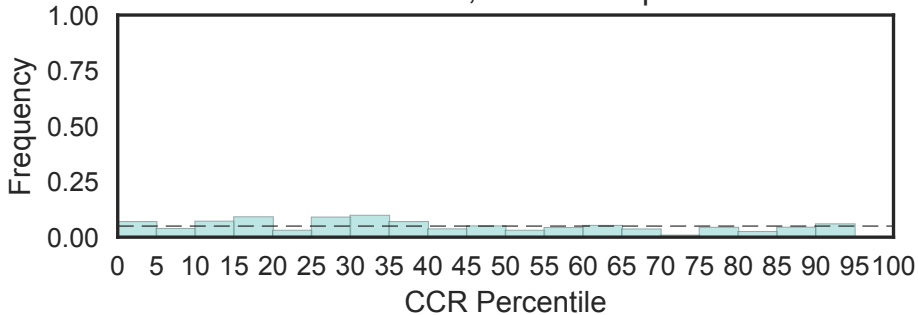

Yip1 domain  
(Yip1, N=7)

Fisher's OR: 0.503; Bonferroni p-val: 1

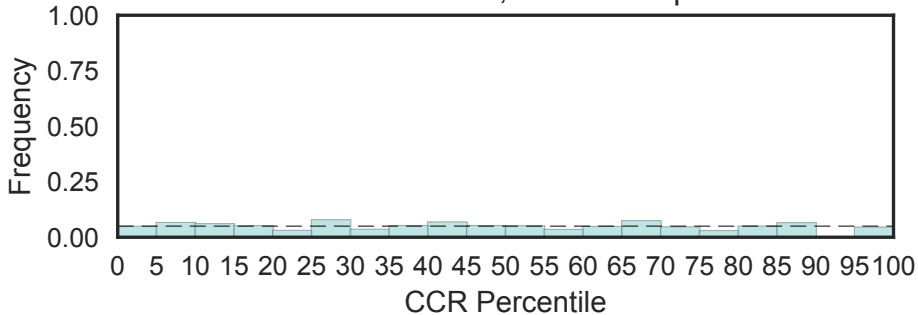

Yippee zinc-binding/DNA-binding /Mis18, centromere assembly  
(Yippee-Mis18, N=8)

Fisher's OR: 3.52; Bonferroni p-val: 1

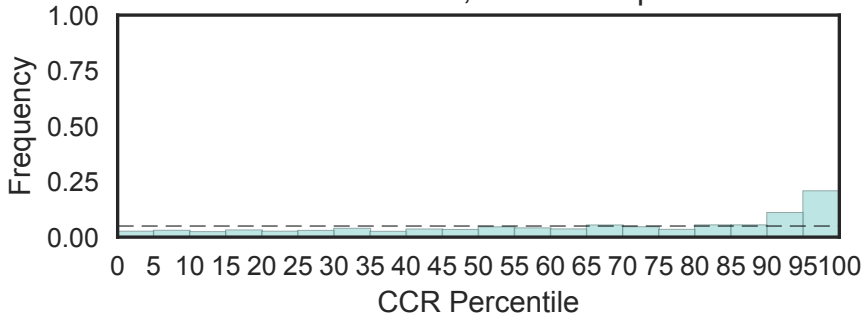



YjeF-related protein N-terminus  
(YjeF\_N, N=6)

Fisher's OR: 0.373; Bonferroni p-val: 1

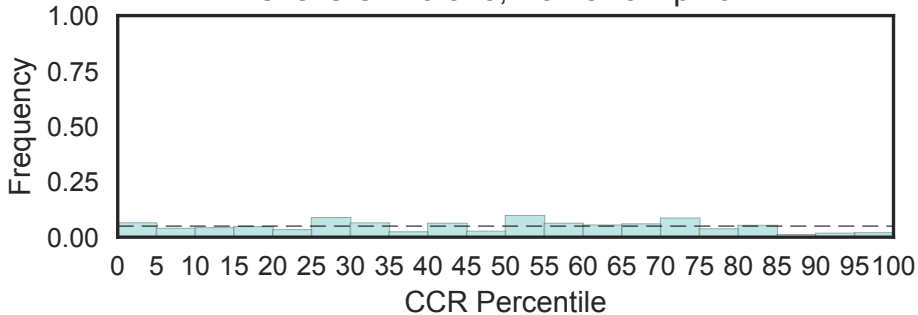

Inner membrane component of T3SS, cytoplasmic domain  
(Yop-YscD\_cpl, N=3)

Fisher's OR: 0; Bonferroni p-val: 1

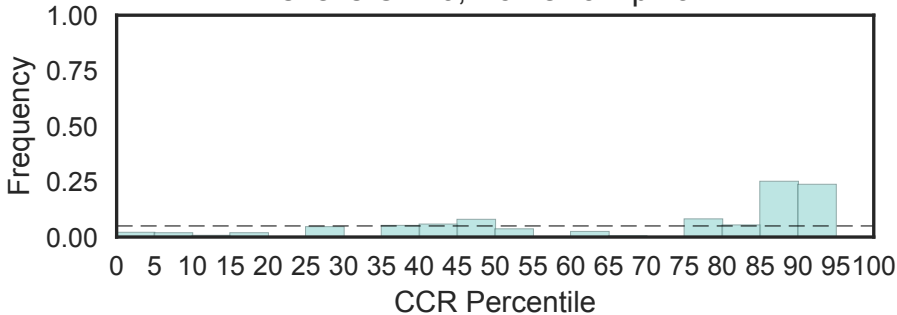

Yos1-like  
(Yos1, N=1)

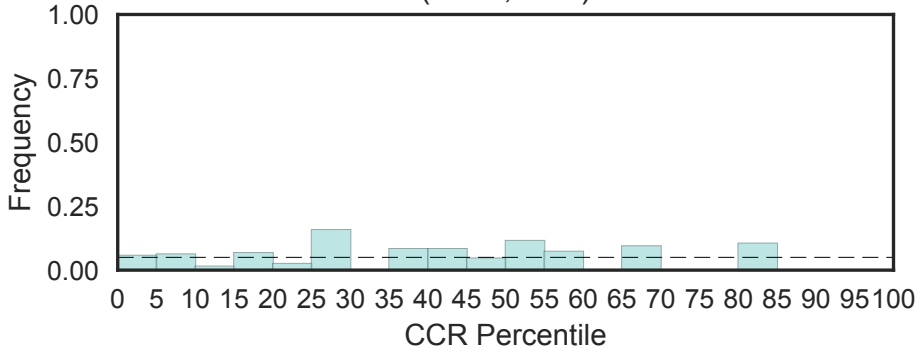

# Holliday-junction resolvase-like of SPT6 (YqgF, N=1)

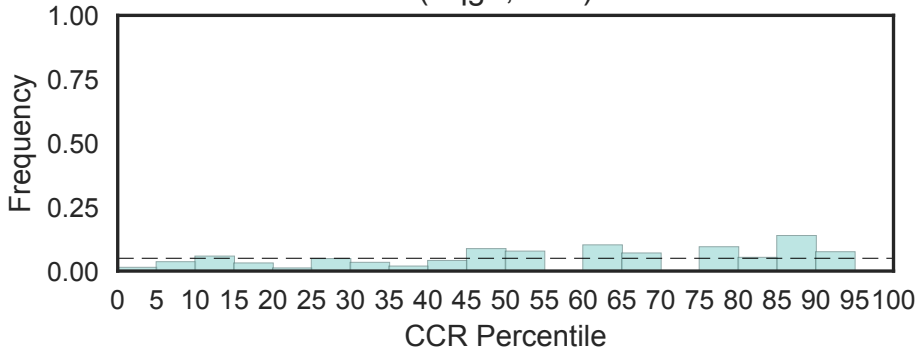

Las17-binding protein actin regulator  
(Ysc84, N=1)

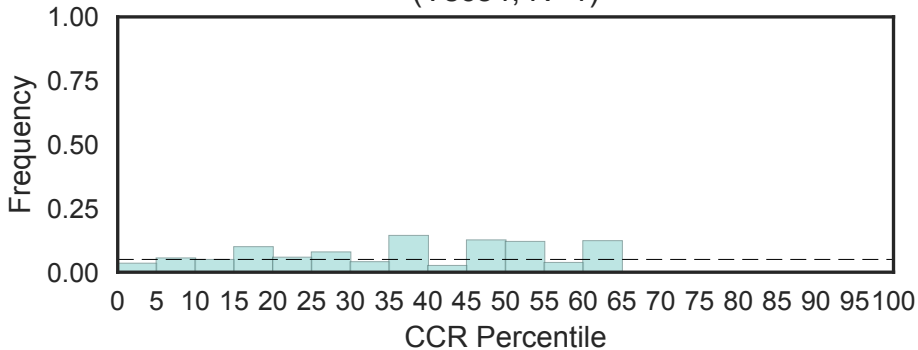

Zinc finger FYVE domain-containing protein 21 C-terminus  
(ZFYVE21\_C, N=1)

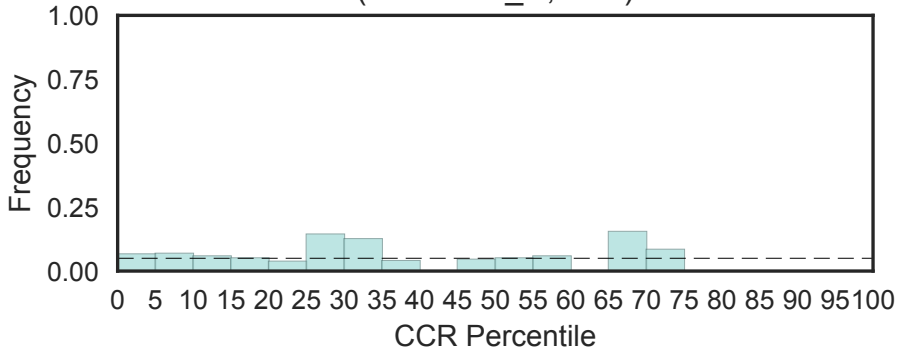

ZU5 domain  
(ZU5, N=15)

Fisher's OR: 0.223; Bonferroni p-val: 1

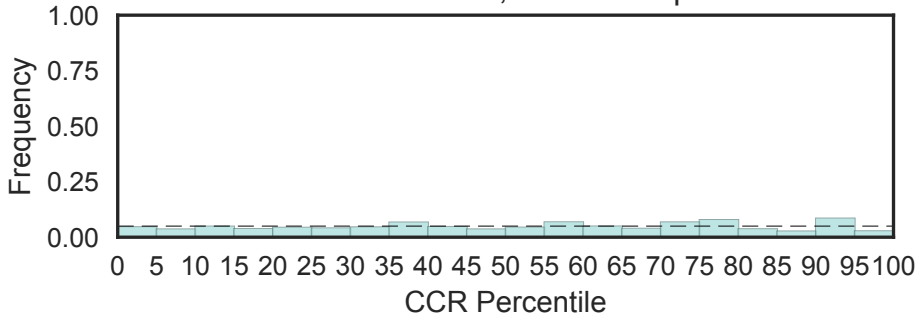

Zinc finger, ZZ type  
(ZZ, N=16)

Fisher's OR: 3.41; Bonferroni p-val: 1

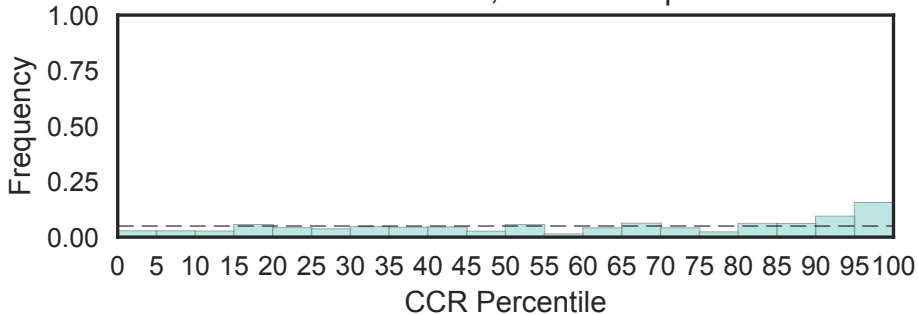



# Zeta toxin

(Zeta\_toxin, N=3)

Fisher's OR: 4.2; Bonferroni p-val: 1

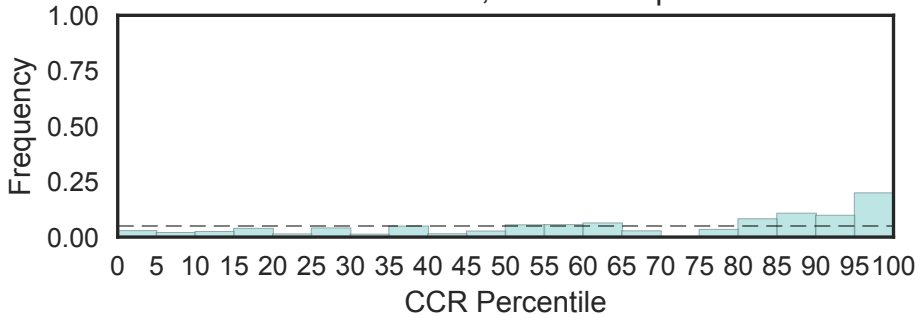

KIAA1045 RING finger  
(Zf\_RING, N=1)

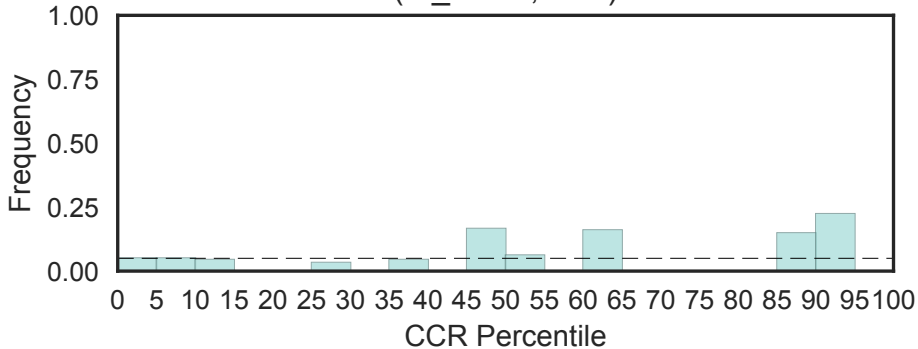

ZIP Zinc transporter  
(Zip, N=18)

Fisher's OR: 0.604; Bonferroni p-val: 1

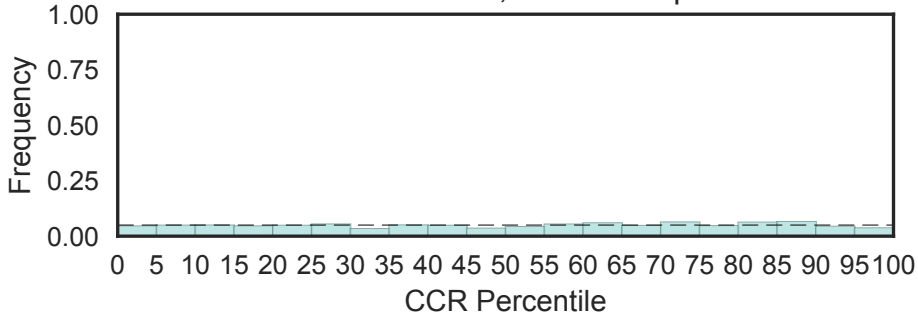

Zinc dependent phospholipase C  
(Zn\_dep\_PLPC, N=1)

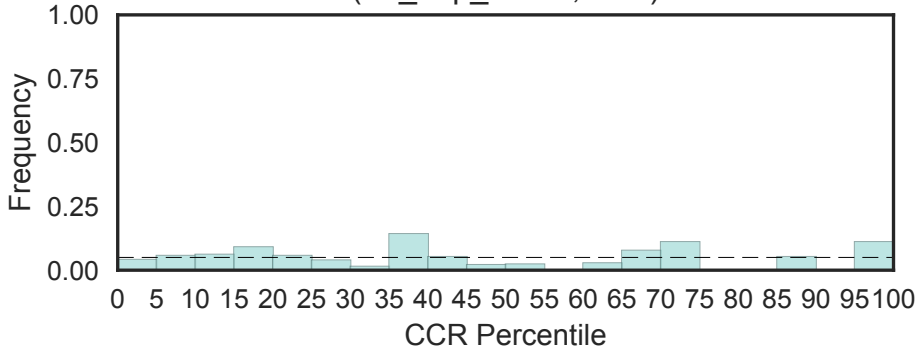

Zinc-ribbon, C4HC2 type  
(Zn\_ribbon\_17, N=1)

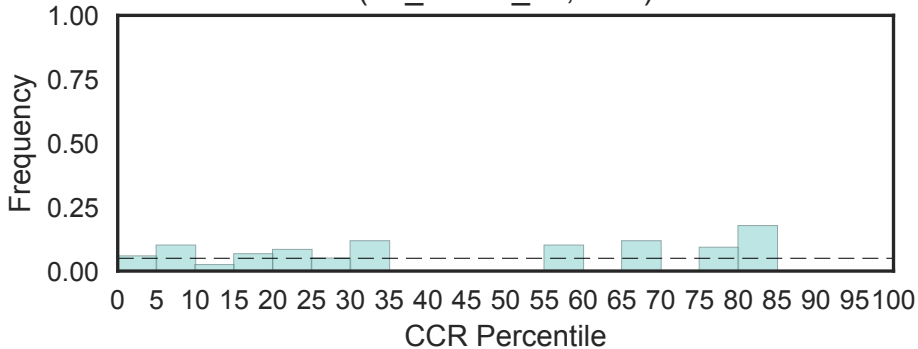

# Zona pellucida-like domain

(Zona\_pellucida, N=17)

Fisher's OR: 0.283; Bonferroni p-val: 1

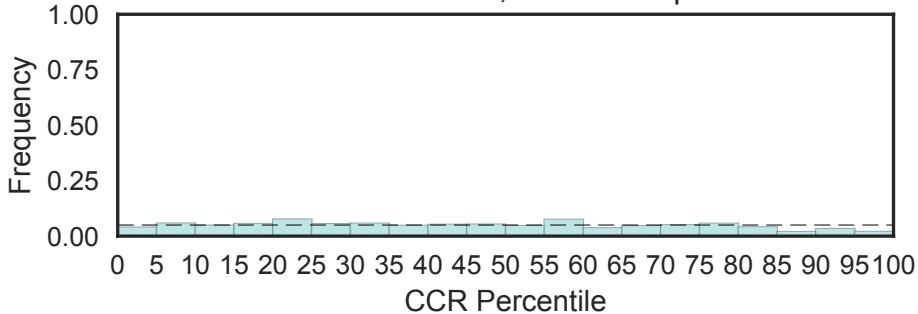

Centromere/kinetochore Zw10  
(Zw10, N=1)

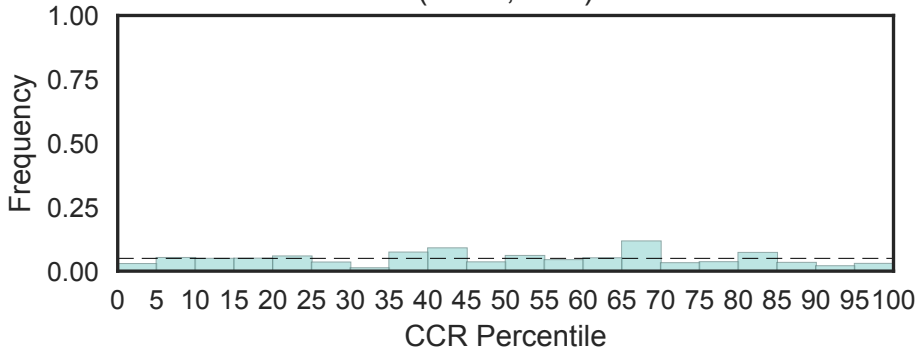

RZZ complex, subunit zwilch  
(Zwilch, N=1)

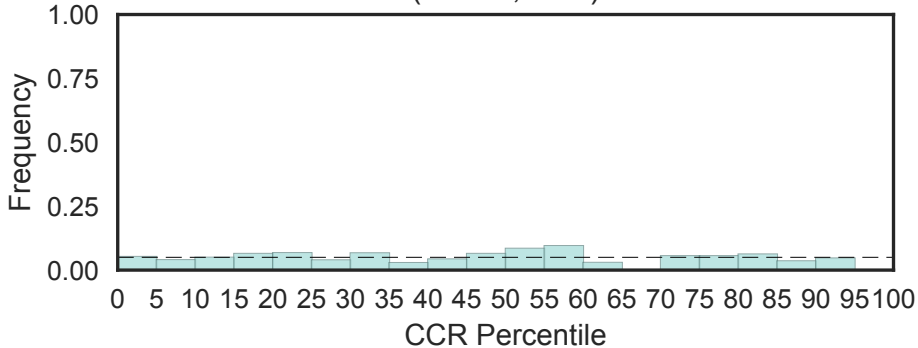



ZW10 interactor  
(Zwint, N=1)

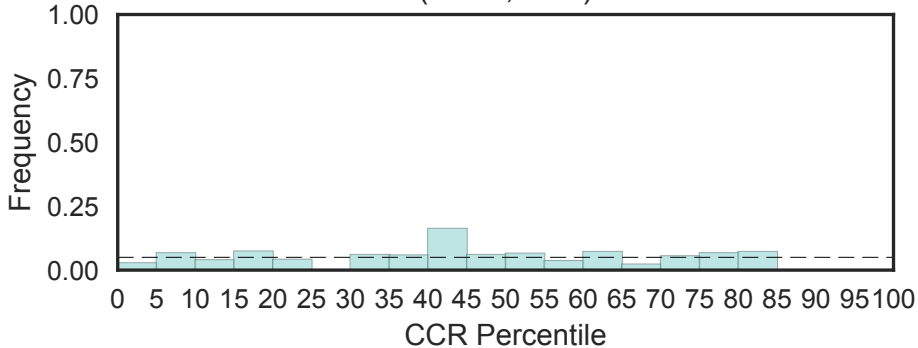

short chain dehydrogenase  
(adh\_short, N=59)

Fisher's OR: 0.191; Bonferroni p-val: 3.2e-05

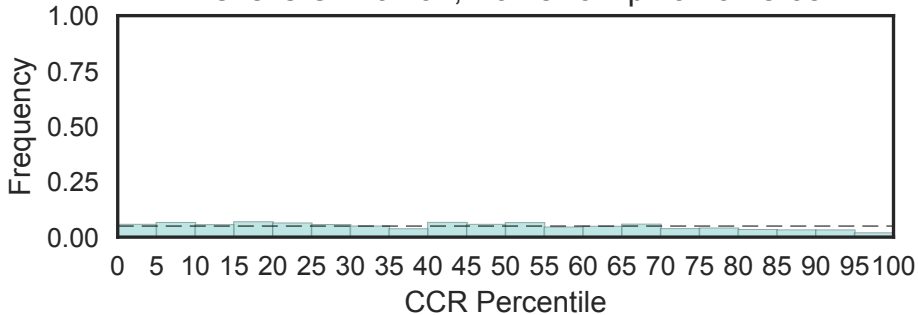

Enoyl-(Acyl carrier protein) reductase  
(adh\_short\_C2, N=57)

Fisher's OR: 0.188; Bonferroni p-val: 2.4e-05

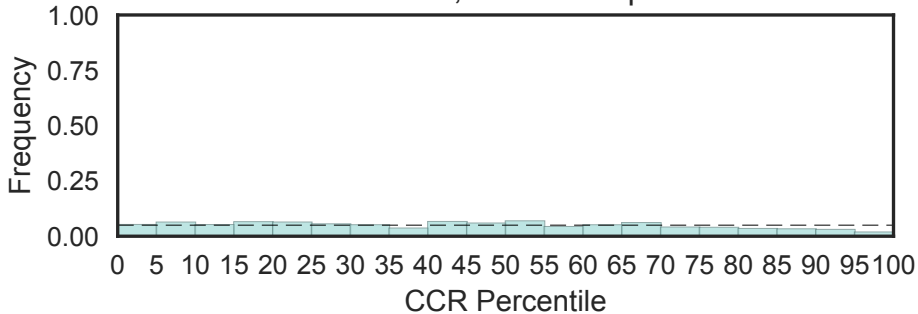

bZIP transcription factor  
(bZIP\_1, N=37)

Fisher's OR: 4.23; Bonferroni p-val: 0.000287

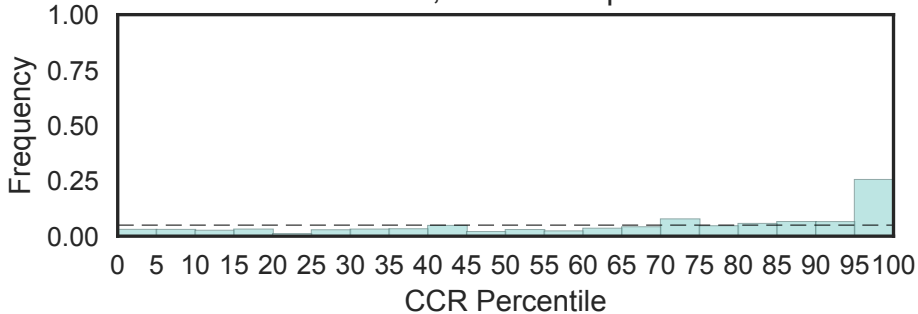

Basic region leucine zipper  
(bZIP\_2, N=46)

Fisher's OR: 4.05; Bonferroni p-val: 0.0003

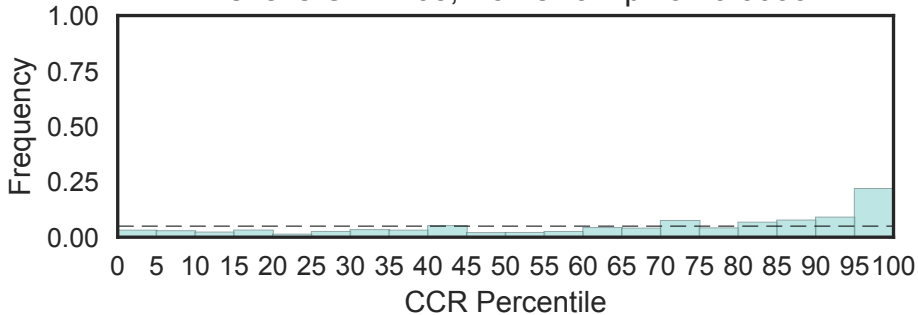

bZIP Maf transcription factor  
(bZIP\_Maf, N=35)

Fisher's OR: 4.72; Bonferroni p-val: 4.41e-06

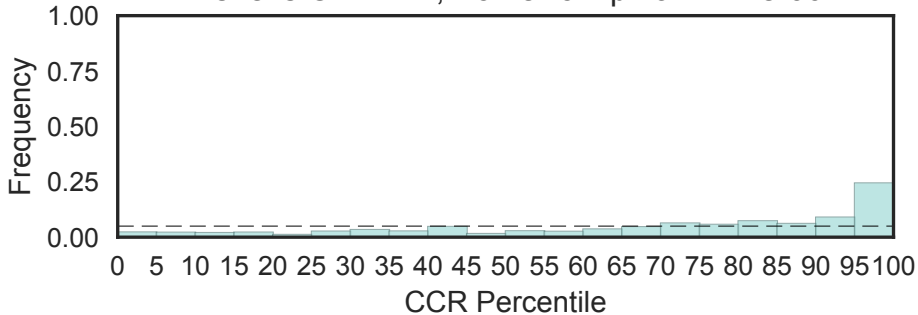

Bcl2-interacting killer, BH3-domain containing  
(bcl-2l13, N=1)

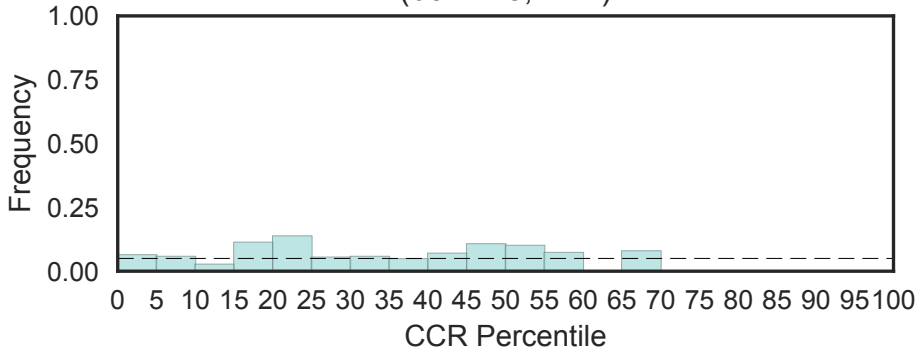

betaPIX coiled coil  
(betaPIX\_CC, N=1)

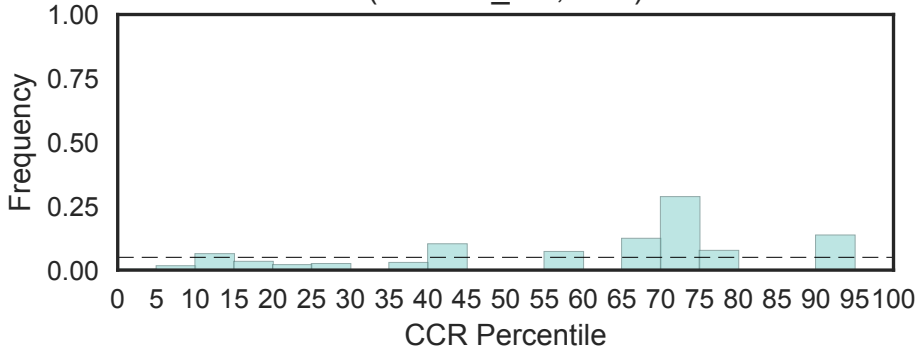



c-SKI Smad4 binding domain  
(c-SKI\_SMAD\_bind, N=4)  
Fisher's OR: 4; Bonferroni p-val: 1

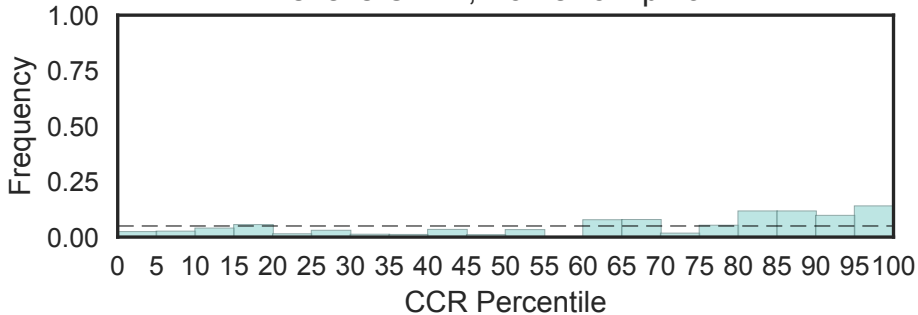

Complement C1r-like EGF-like  
(cEGF, N=129)

Fisher's OR: 0.639; Bonferroni p-val: 1

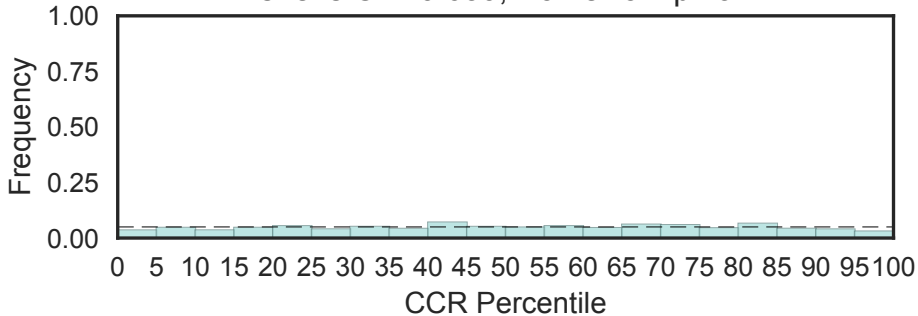

Cyclic nucleotide-binding domain  
(cNMP\_binding, N=45)

Fisher's OR: 2.24; Bonferroni p-val: 0.404

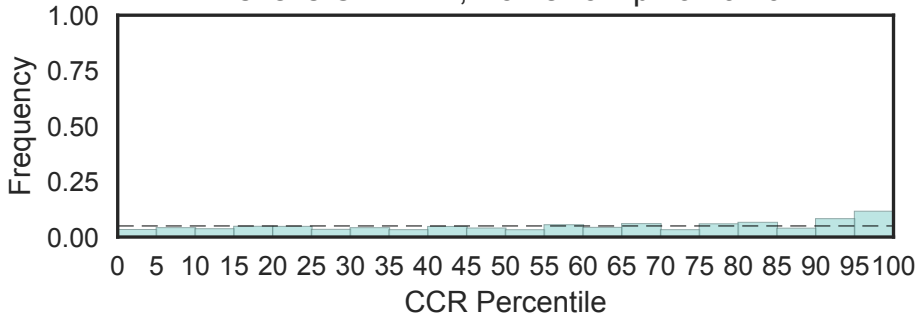

CobW/HypB/UreG, nucleotide-binding domain  
(cobW, N=10)

Fisher's OR: 11.4; Bonferroni p-val: 1

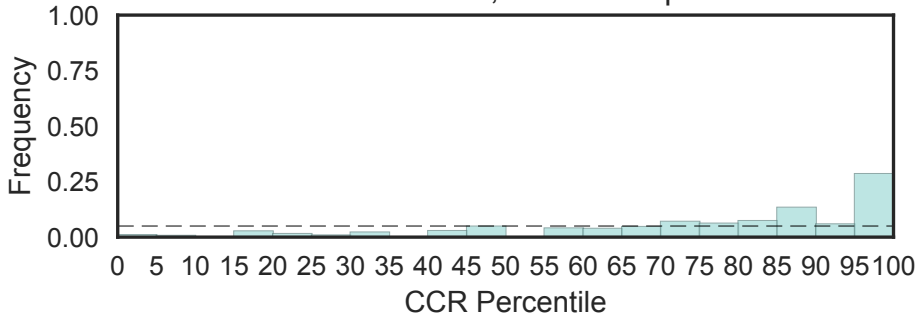

cwf18 pre-mRNA splicing factor  
(cwf18, N=1)

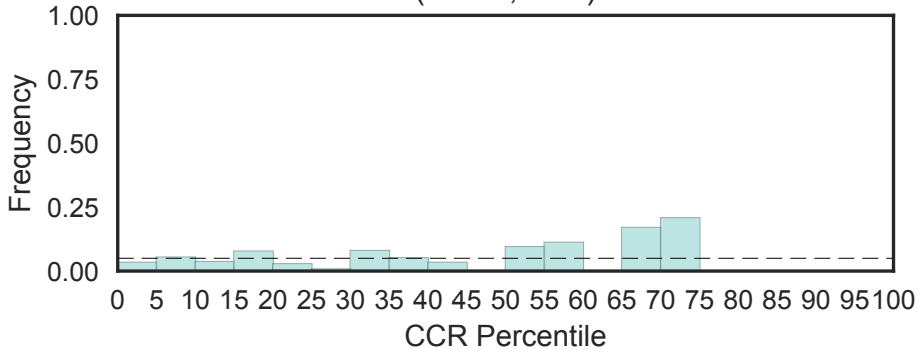

cwf21 domain  
(cwf21, N=3)

Fisher's OR: 0; Bonferroni p-val: 1

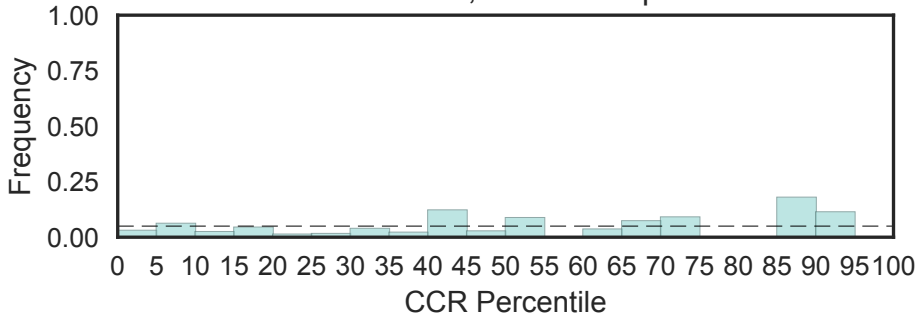

Cytidine and deoxycytidylate deaminase zinc-binding region  
(dCMP\_cyt\_deam\_1, N=8)

Fisher's OR: 0; Bonferroni p-val: 1

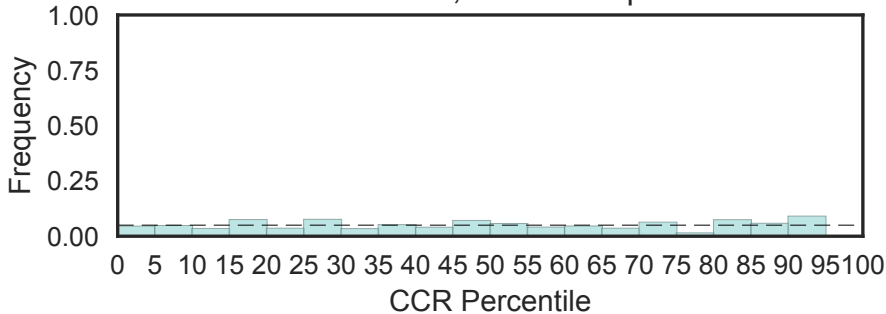

Cytidine and deoxycytidylate deaminase zinc-binding region  
(dCMP\_cyt\_deam\_2, N=1)

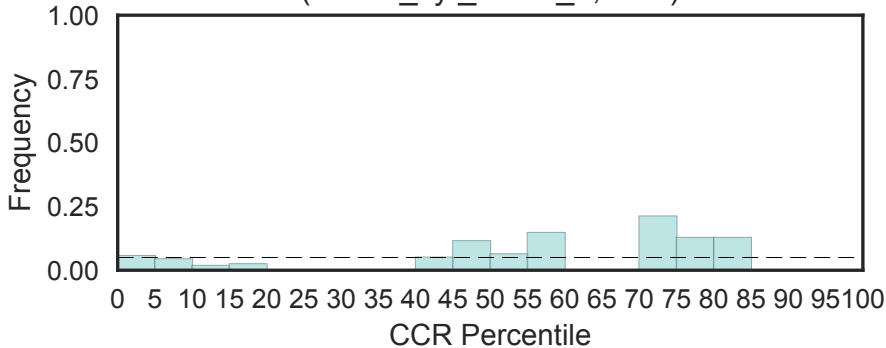



Cache domain  
(dCache\_1, N=1)

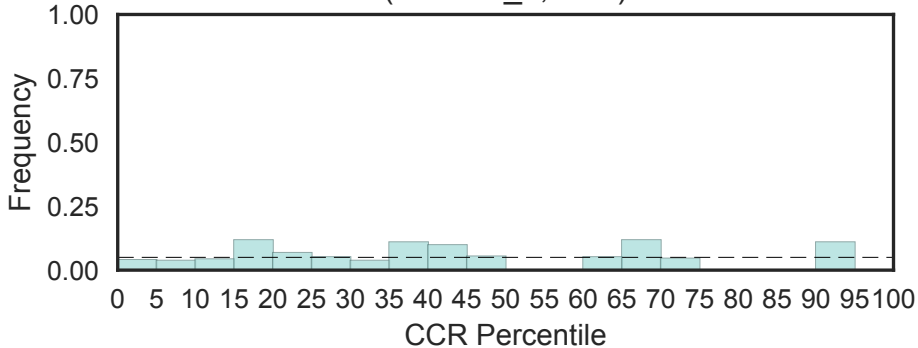

dDENN domain  
(dDENN, N=12)

Fisher's OR: 2.38; Bonferroni p-val: 1

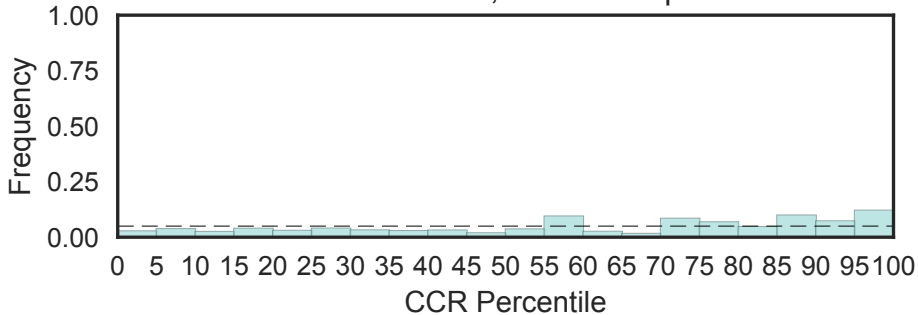

Deoxynucleoside kinase  
(dNK, N=5)

Fisher's OR: 0; Bonferroni p-val: 1

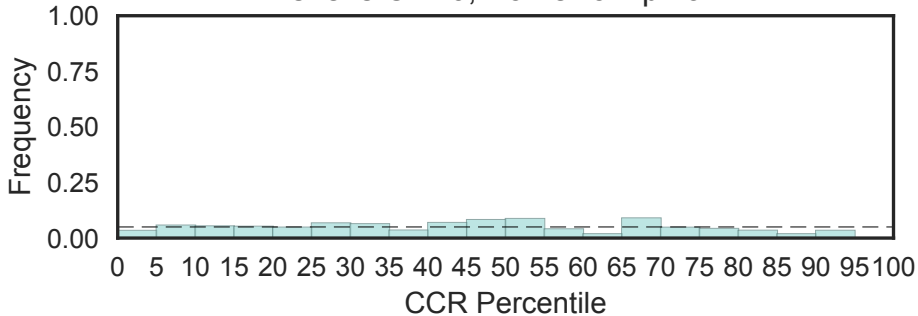

dUTPase  
(dUTPase, N=1)

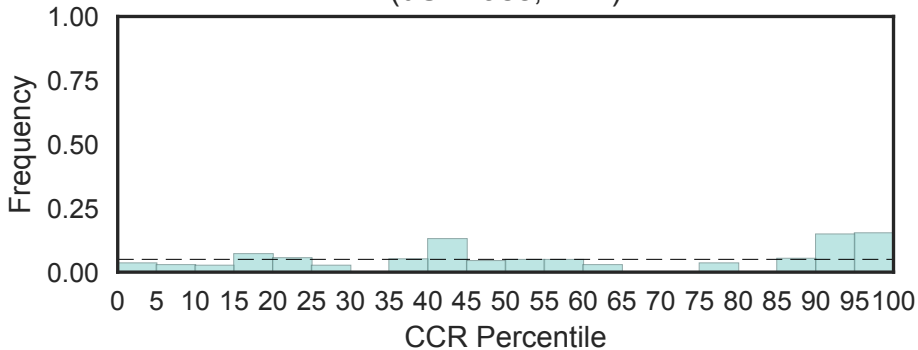

# Unstructured region between two PDZ domains on Dlg5 (dbPDZ\_assoc, N=1)

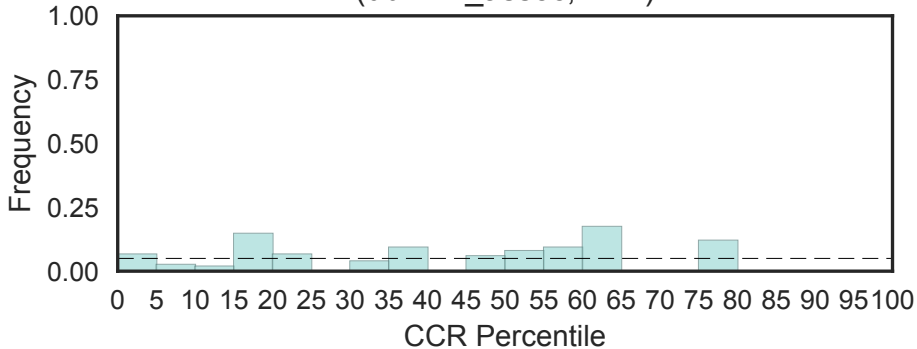

Double-stranded DNA-binding domain  
(dsDNA\_bind, N=1)

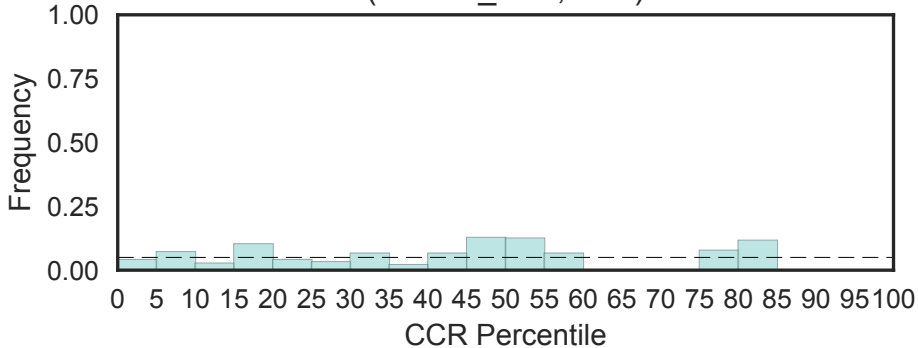

Double-stranded RNA binding motif  
(dsrm, N=34)

Fisher's OR: 3.75; Bonferroni p-val: 0.0124

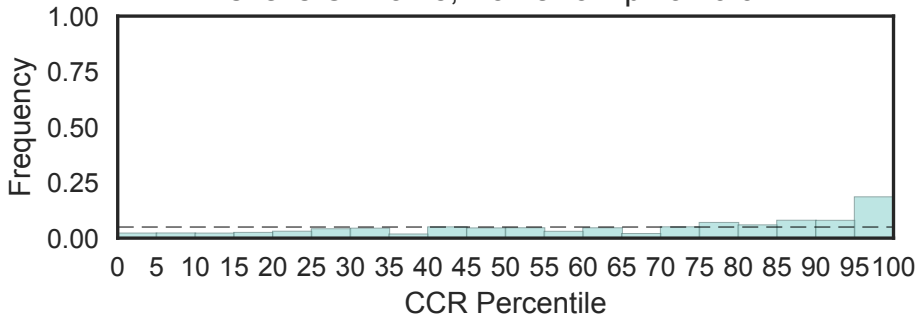

Translation initiation factor 1A / IF-1  
(eIF-1a, N=1)

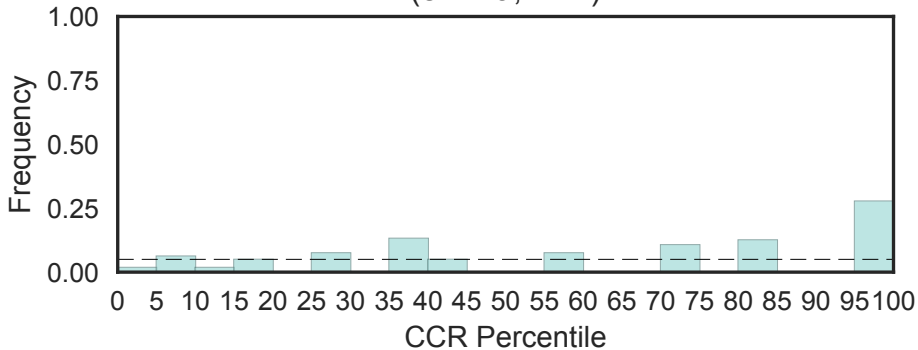



# Eukaryotic translation initiation factor 3 subunit 7 (eIF-3) (eIF-3\_zeta, N=1)

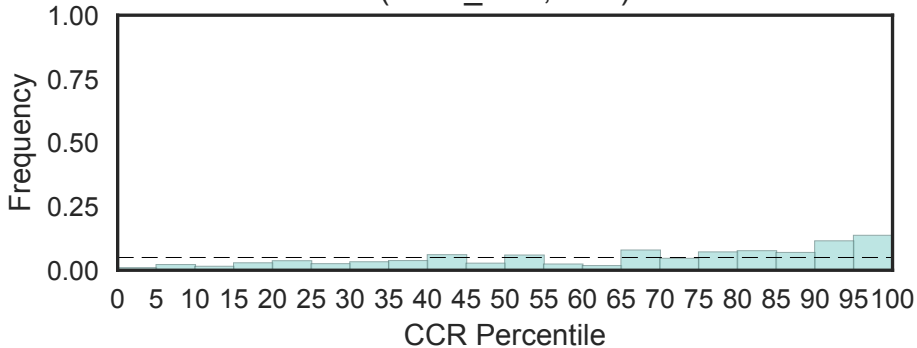

Domain found in IF2B/IF5  
(eIF-5\_eIF-2B, N=2)

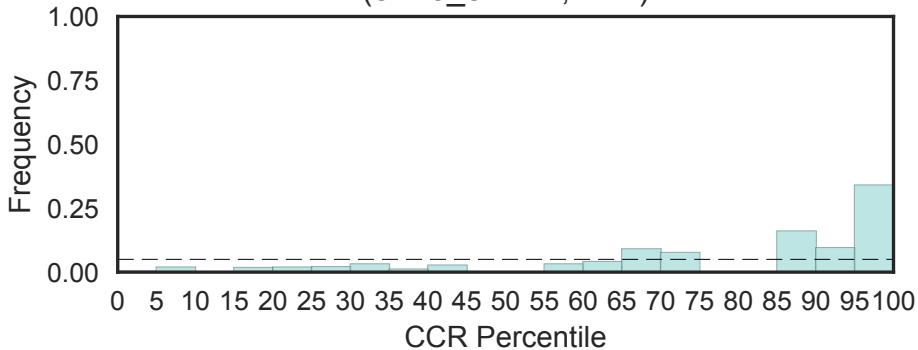

Eukaryotic elongation factor 5A hypusine, DNA-binding OB fold  
(eIF-5a, N=4)

Fisher's OR: 6.49; Bonferroni p-val: 1

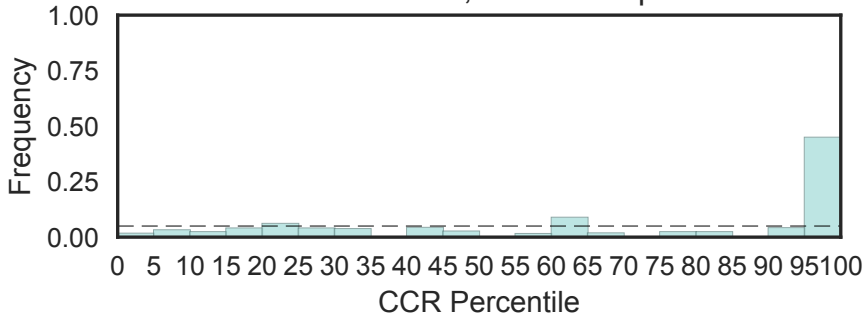

eIF-6 family  
(eIF-6, N=1)

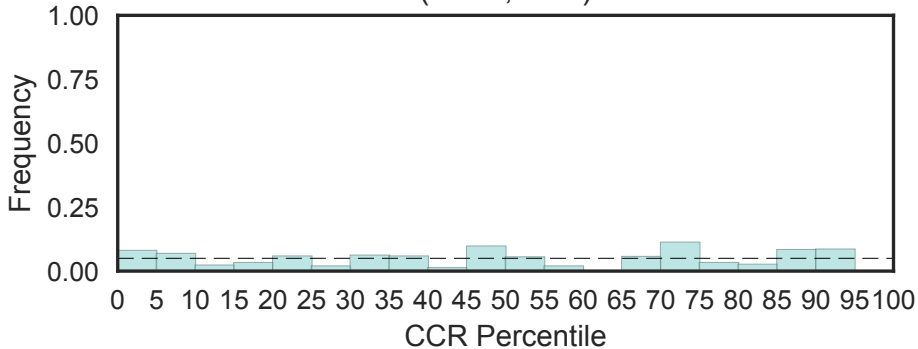

Eukaryotic translation initiation factor eIF2A  
(eIF2A, N=10)

Fisher's OR: 1.89; Bonferroni p-val: 1

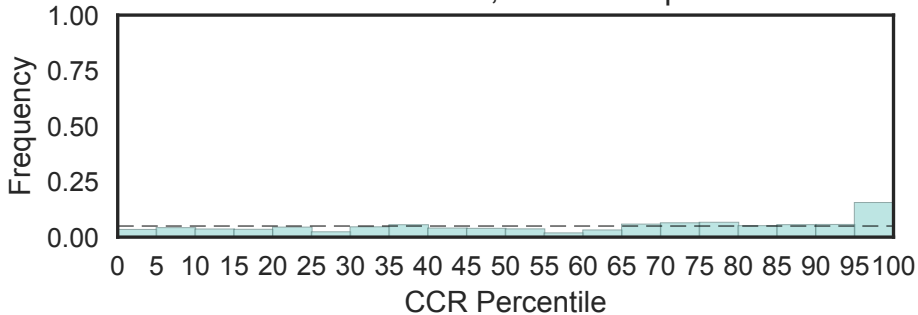

eIF3 subunit 6 N terminal domain  
(eIF3\_N, N=1)

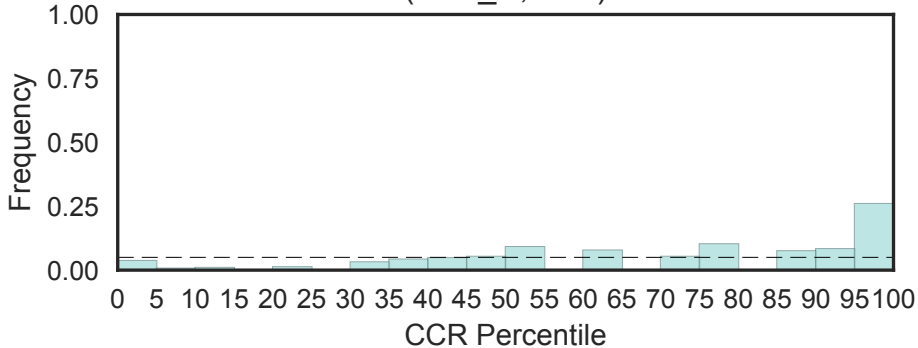

Translation initiation factor eIF3 subunit 135  
(eIF3\_p135, N=1)

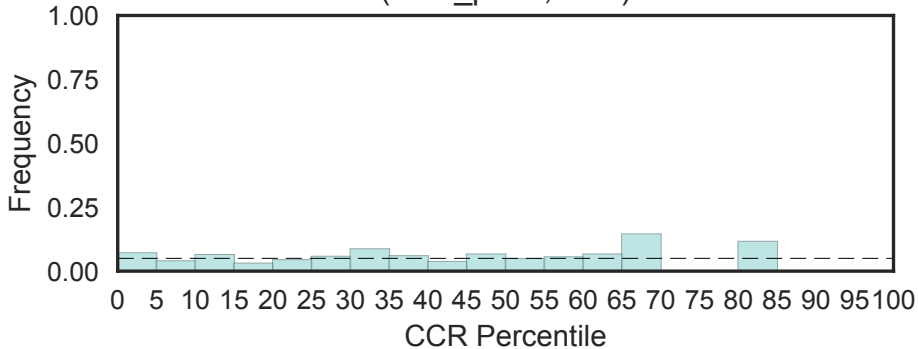

Translation initiation factor eIF3 subunit  
(eIF3\_subunit, N=1)

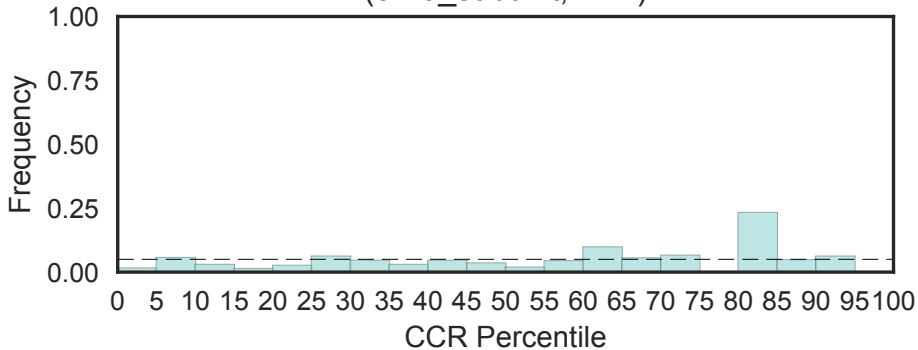



# Eukaryotic translation initiation factor 3 subunit G (eIF3g, N=1)

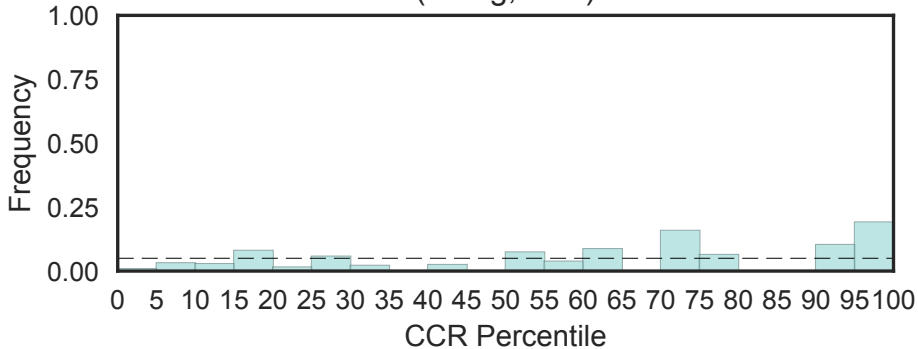

Eukaryotic translation initiation factor 4E binding protein (EIF4EBP)  
(eIF\_4EBP, N=5)

Fisher's OR: 0.74; Bonferroni p-val: 1

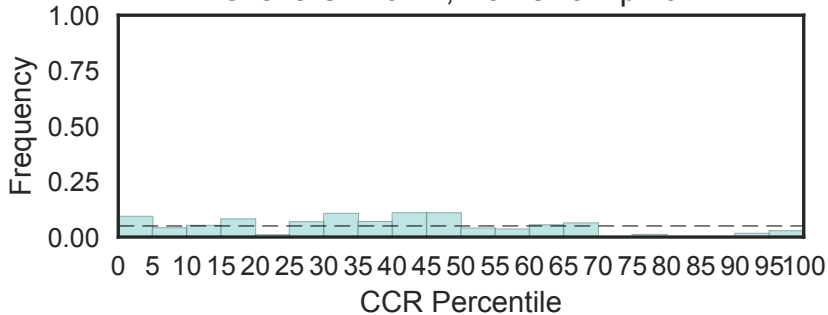

eRF1 domain 1  
(eRF1\_1, N=2)

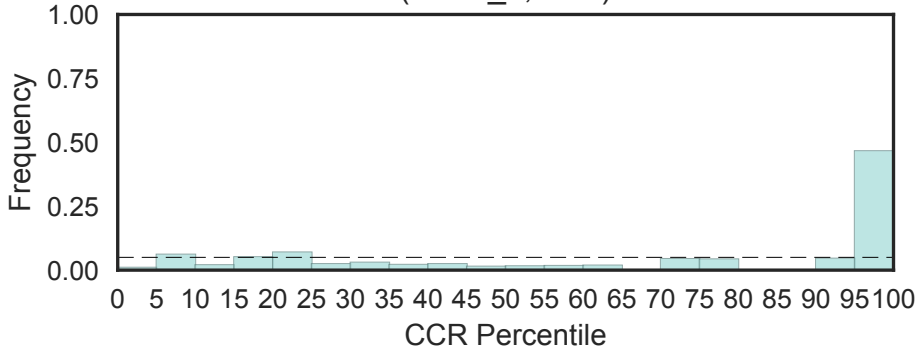

eRF1 domain 2  
(eRF1\_2, N=2)

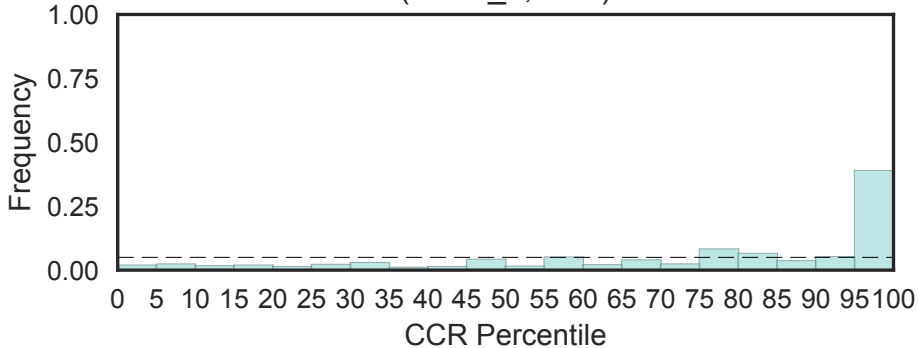

eRF1 domain 3  
(eRF1\_3, N=2)

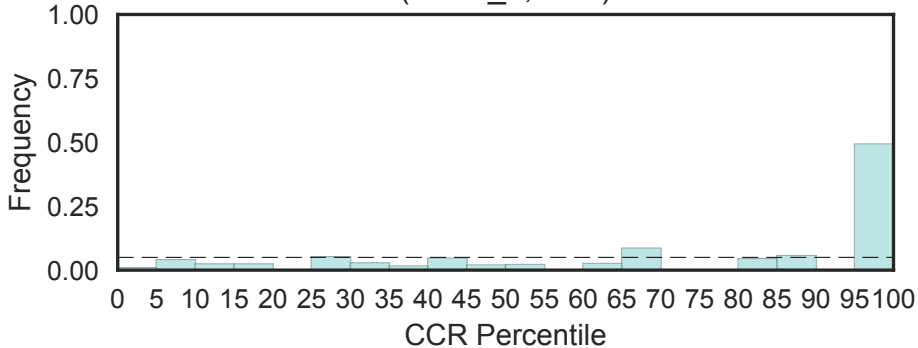

Transforming growth factor beta receptor 2 ectodomain  
(ecTbetaR2, N=1)

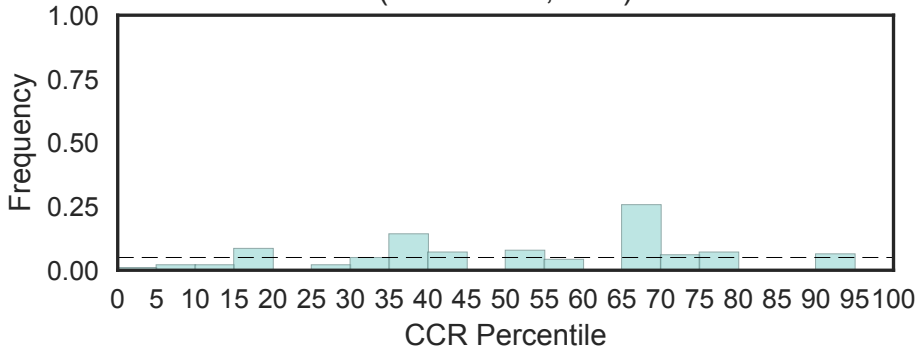

THO complex subunit 1 transcription elongation factor  
(efThoc1, N=2)

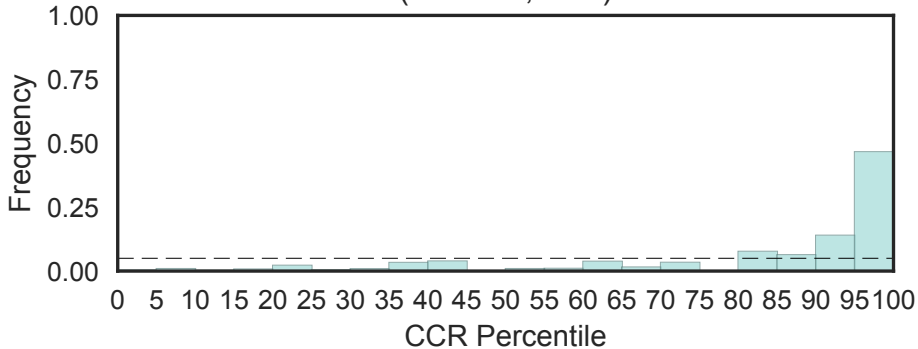

Fibronectin type I domain  
(fn1, N=15)

Fisher's OR: 0.563; Bonferroni p-val: 1

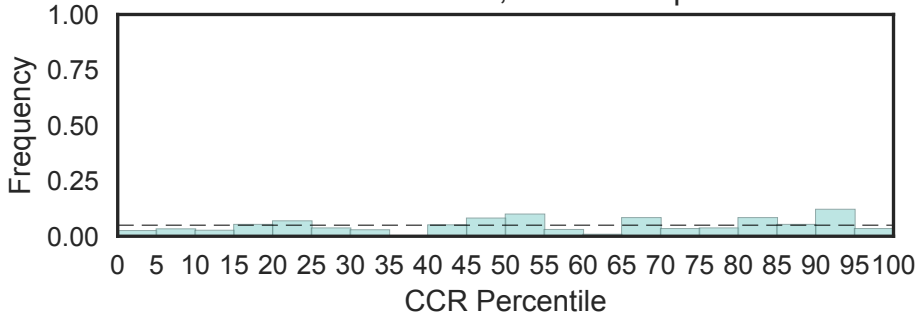



Fibronectin type II domain  
(fn2, N=24)

Fisher's OR: 0.307; Bonferroni p-val: 1

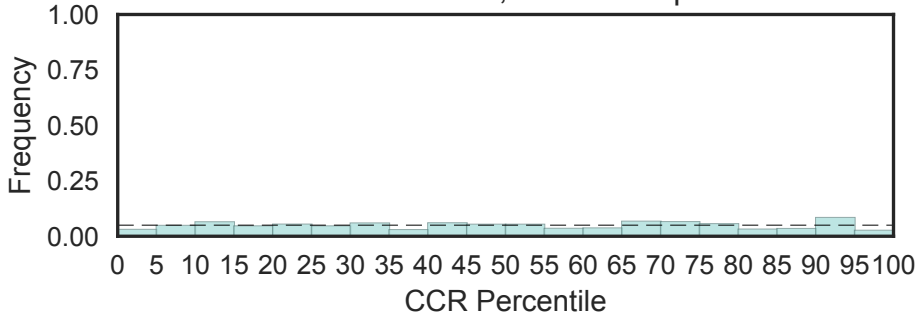

Fibronectin type III domain  
(fn3, N=611)

Fisher's OR: 0.279; Bonferroni p-val: 9.74e-25

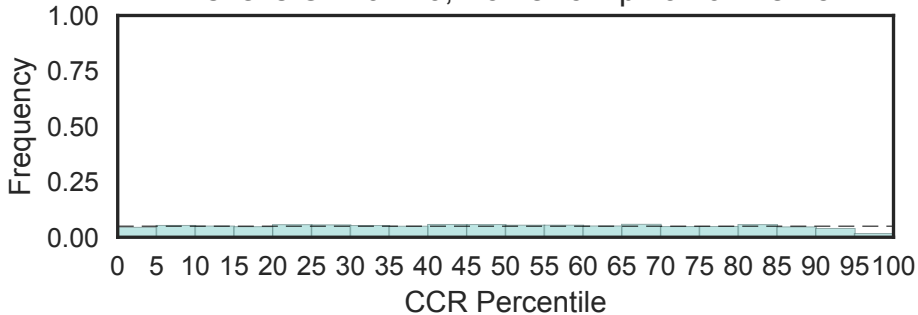

Fibronectin-III type domain  
(fn3\_4, N=2)

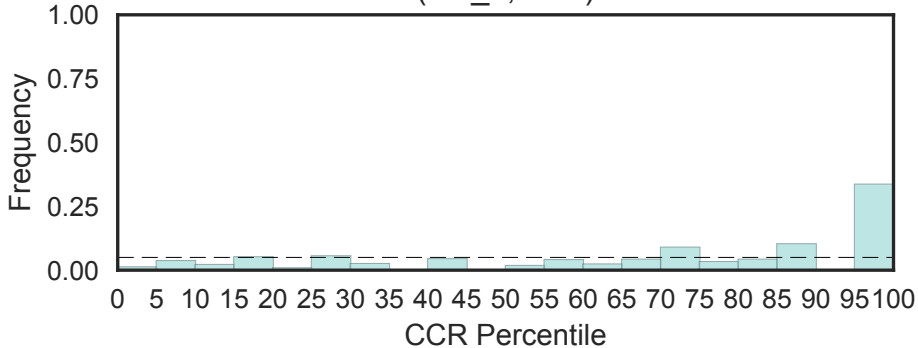

gag-polyprotein putative aspartyl protease  
(gag-asp\_proteas, N=4)

Fisher's OR: 0.886; Bonferroni p-val: 1

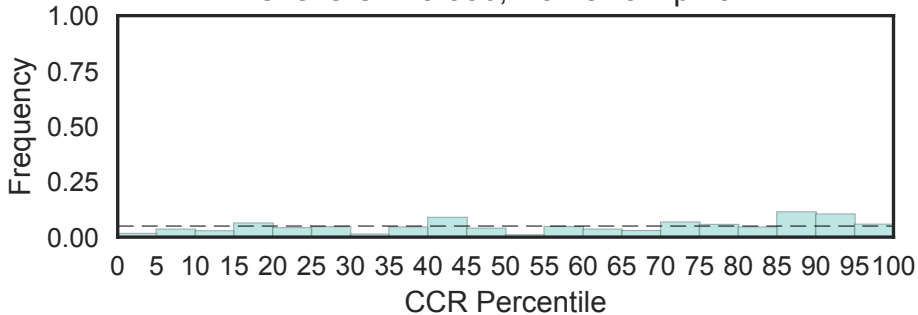

# Glycogen debranching enzyme, glucanotransferase domain (hDGE\_amylase, N=1)

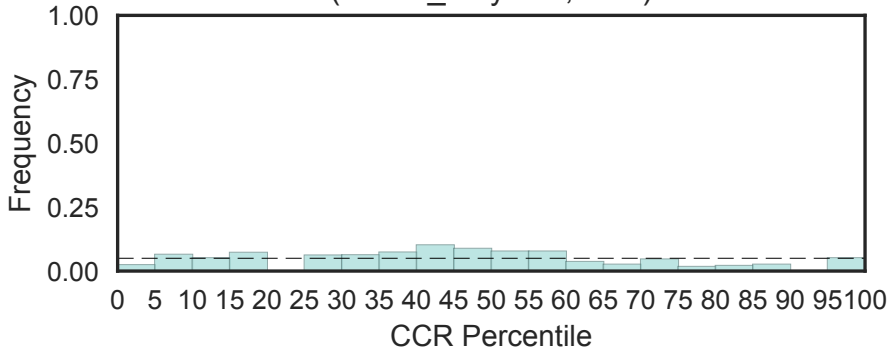

Human growth factor-like EGF  
(hEGF, N=479)

Fisher's OR: 0.827; Bonferroni p-val: 1

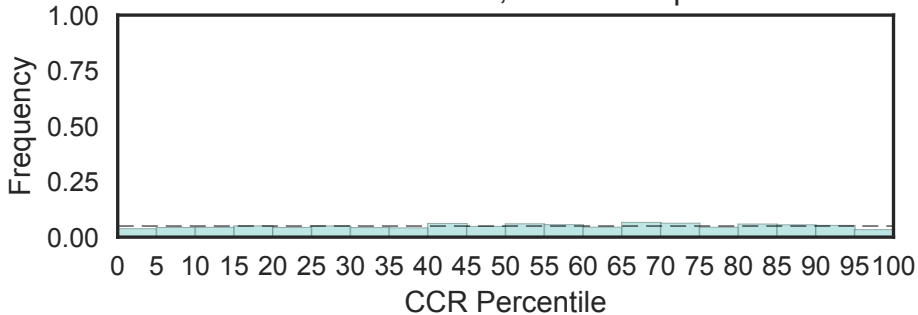

# N-terminal domain from the human glycogen debranching enzyme (hGDE\_N, N=1)

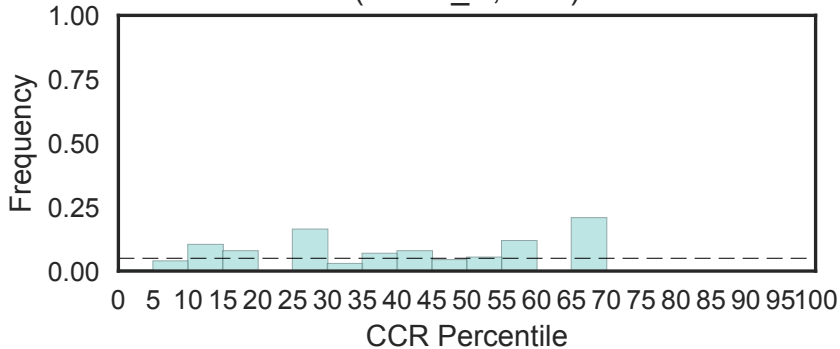

Central domain of human glycogen debranching enzyme  
(hGDE\_central, N=1)

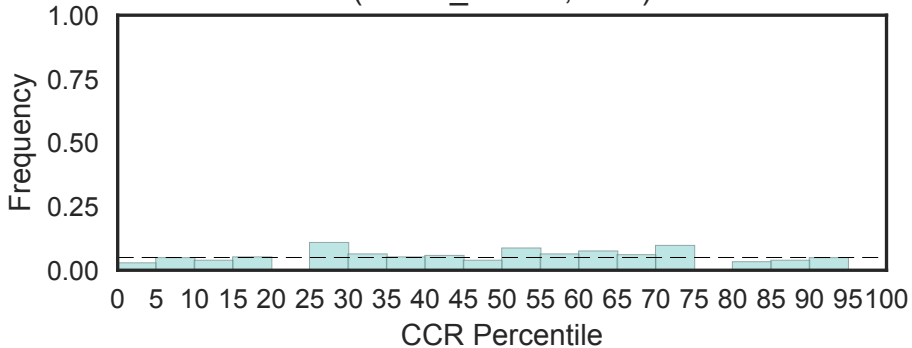



FHA Ki67 binding domain of hNIFK  
(hNIFK\_binding, N=1)

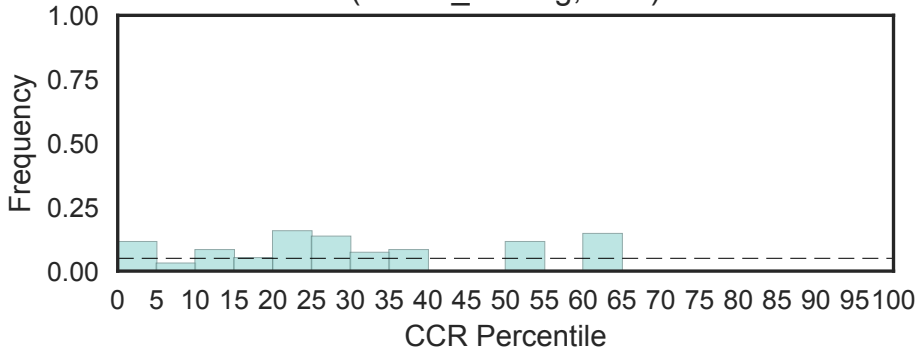

Helically-extended SH3 domain  
(hSH3, N=4)

Fisher's OR: 0; Bonferroni p-val: 1

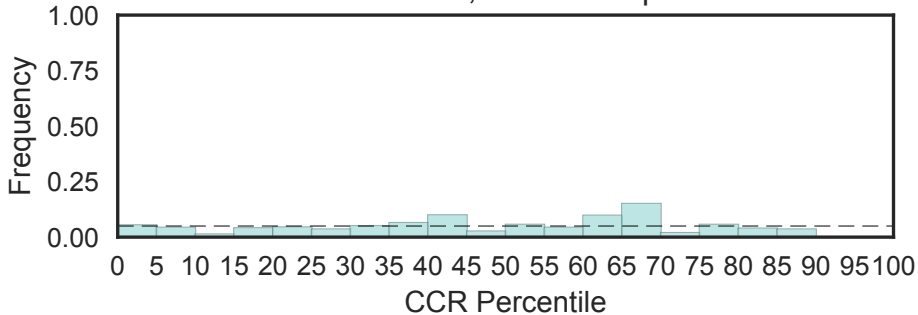

Inositol phosphatase  
(hSac2, N=3)

Fisher's OR: 0; Bonferroni p-val: 1

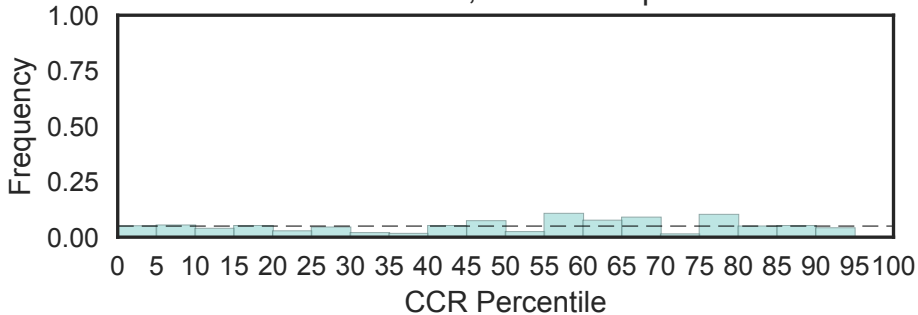

Immunoglobulin domain  
(ig, N=609)

Fisher's OR: 0.461; Bonferroni p-val: 7.16e-10

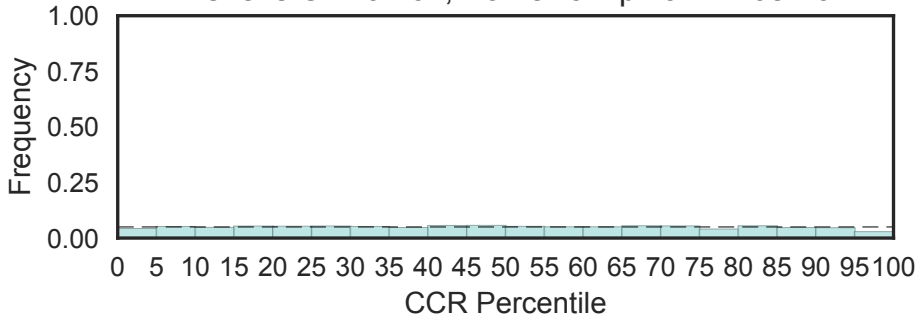

Beta-ketoacyl synthase, N-terminal domain  
(ketoacyl-synt, N=4)

Fisher's OR: 0.94; Bonferroni p-val: 1

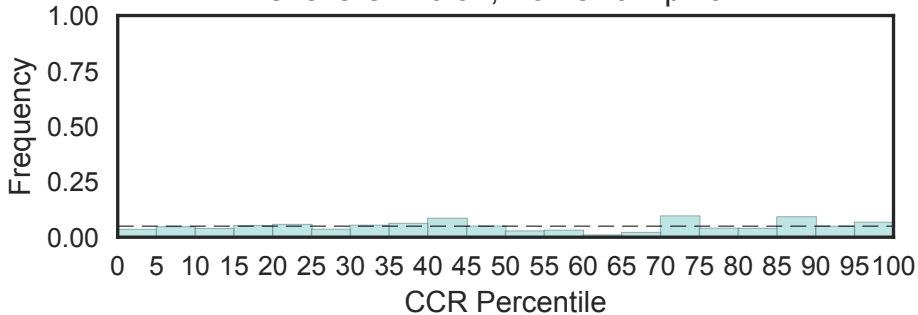

mRNA capping enzyme, C-terminal domain  
(mRNA\_cap\_C, N=1)

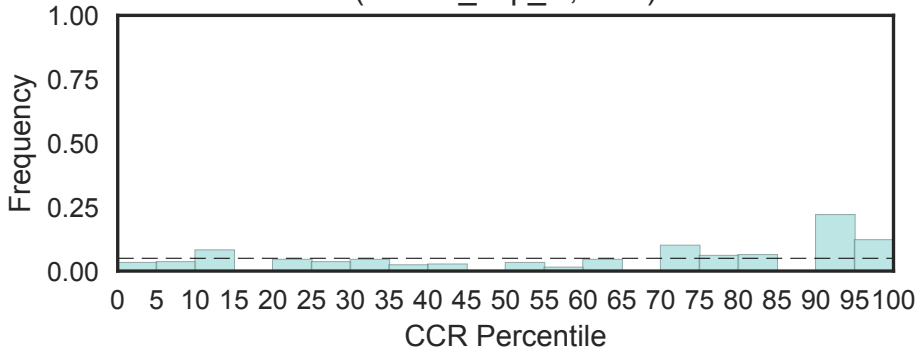

mRNA capping enzyme, catalytic domain  
(mRNA\_cap\_enzyme, N=1)

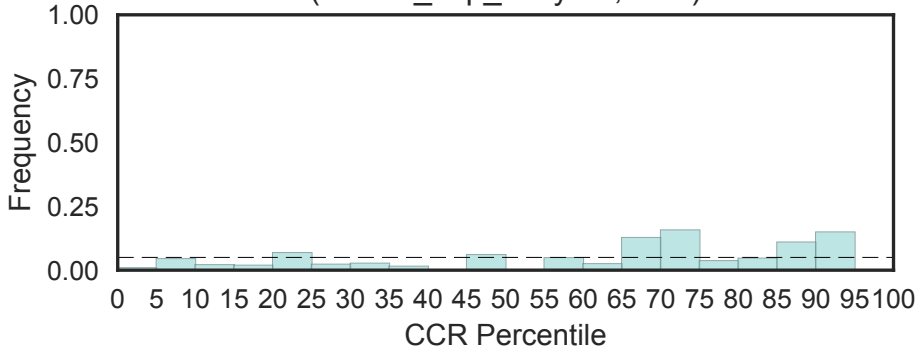

mRNA-decapping enzyme C-terminus  
(mRNA\_decap\_C, N=2)

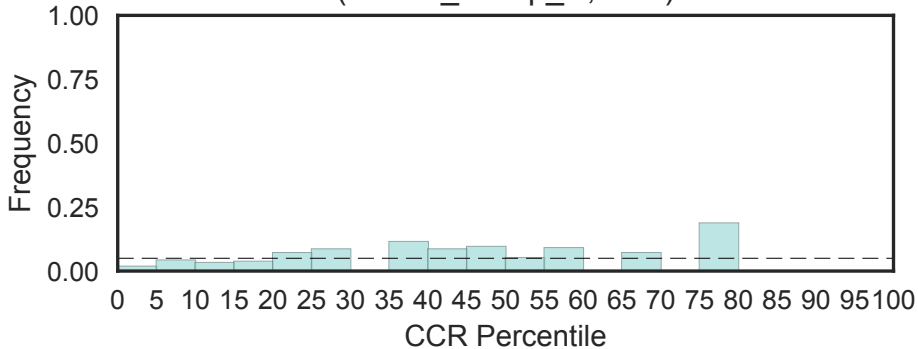



mTERF

(mTERF, N=4)

Fisher's OR: 0; Bonferroni p-val: 1

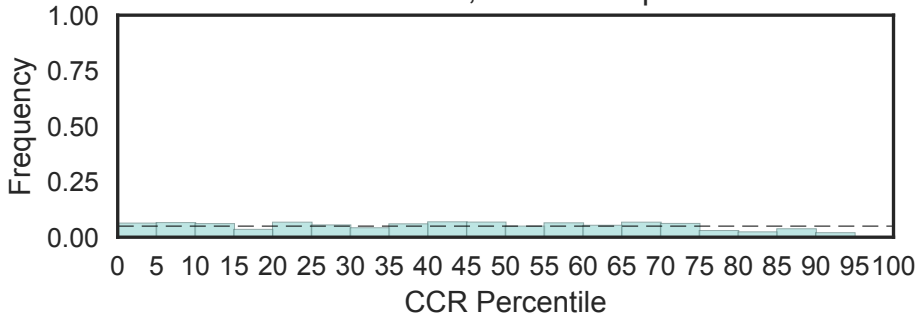

Malic enzyme, N-terminal domain  
(malic, N=3)

Fisher's OR: 0; Bonferroni p-val: 1

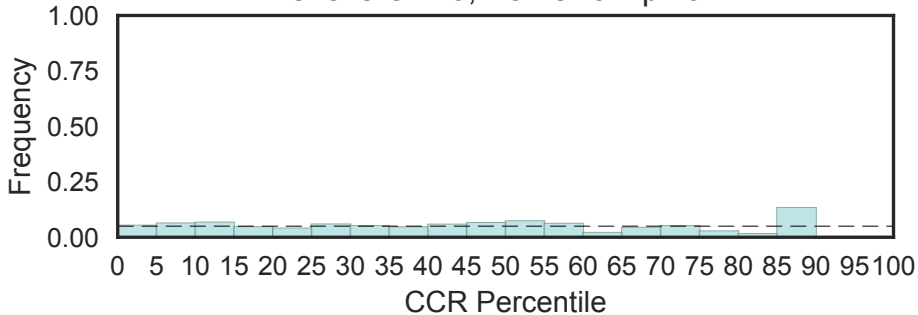

Muniscin C-terminal mu homology domain  
(muHD, N=3)

Fisher's OR: 0.883; Bonferroni p-val: 1

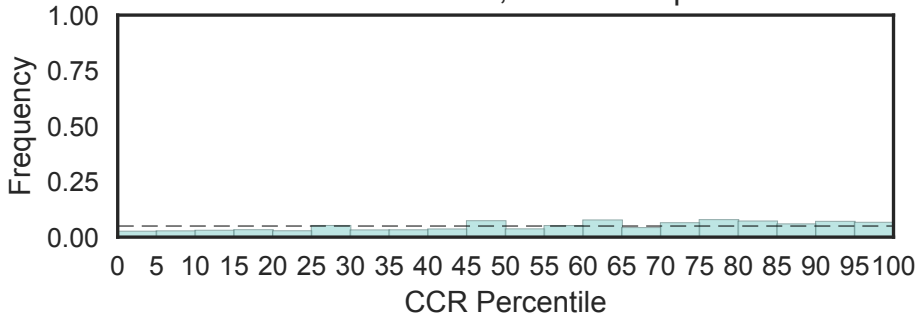

NocA-like zinc-finger protein 1  
(nlz1, N=2)

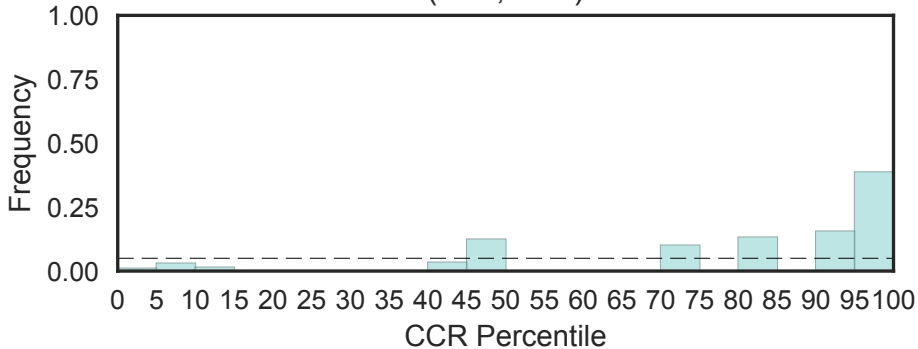

p25-alpha  
(p25-alpha, N=4)  
Fisher's OR: 0; Bonferroni p-val: 1

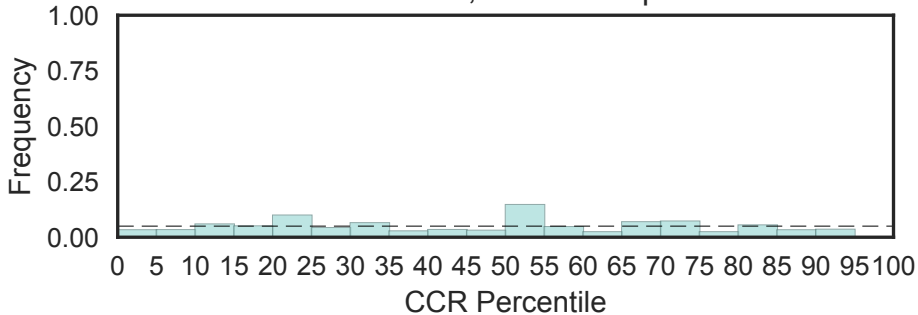

Mad1 and Cdc20-bound-Mad2 binding  
(p31comet, N=1)

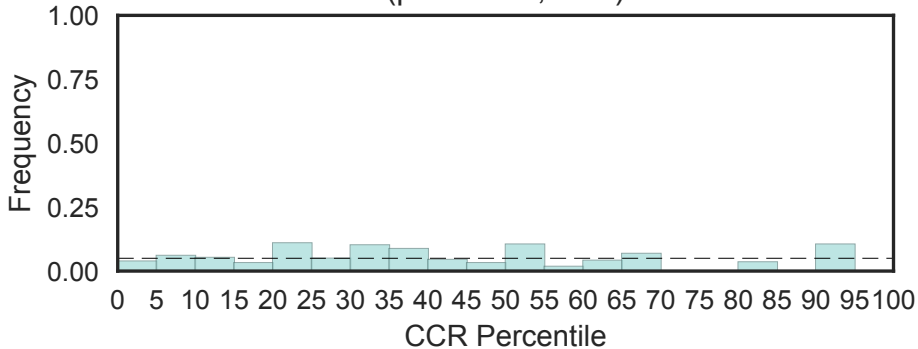

# Cytochrome P450

(p450, N=64)

Fisher's OR: 0.12; Bonferroni p-val: 1.27e-17

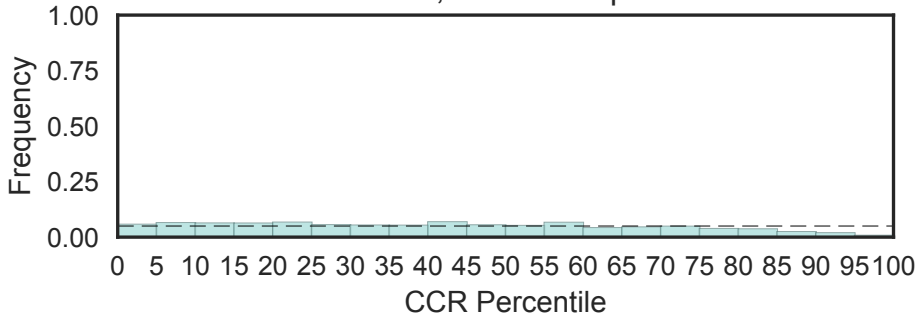

Tumour protein p53-inducible protein 11  
(p53-inducible11, N=1)

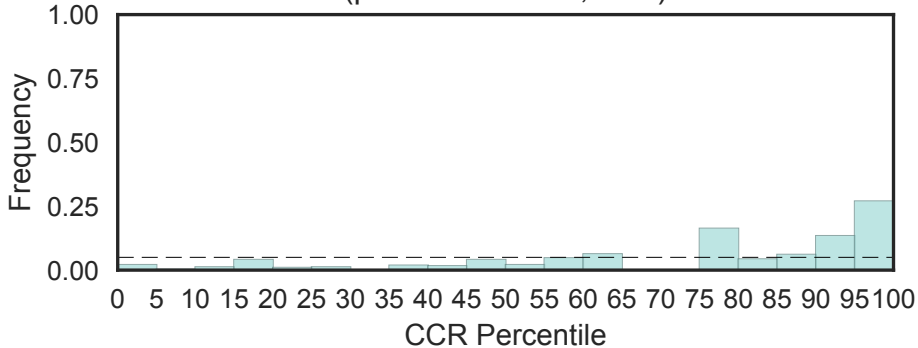



pKID domain  
(pKID, N=3)

Fisher's OR: 6.01; Bonferroni p-val: 1

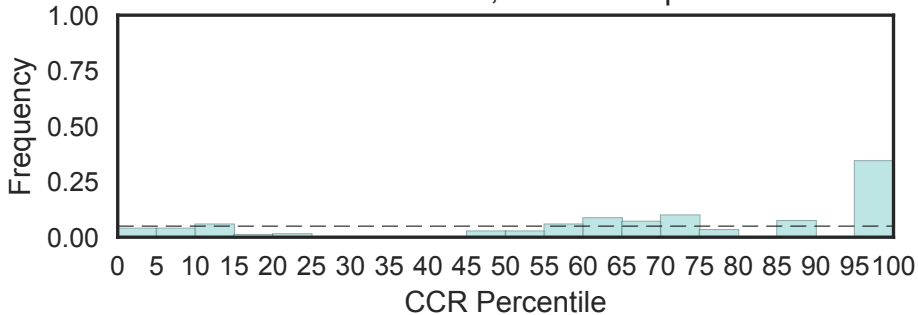

Polyprenyl synthetase  
(polyprenyl\_synt, N=4)

Fisher's OR: 0.316; Bonferroni p-val: 1

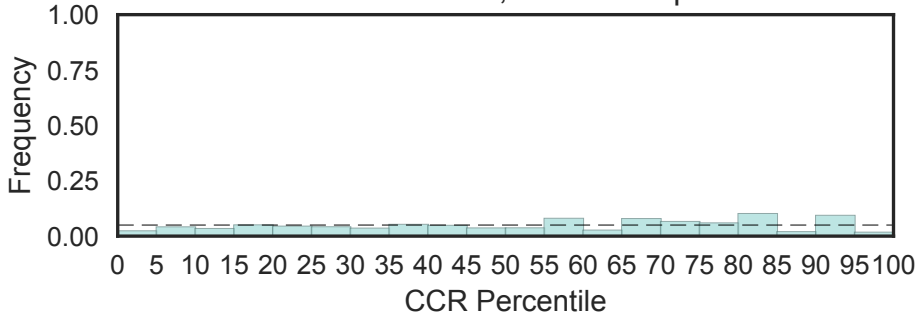

rRNA-processing arch domain  
(rRNA\_proc-arch, N=2)

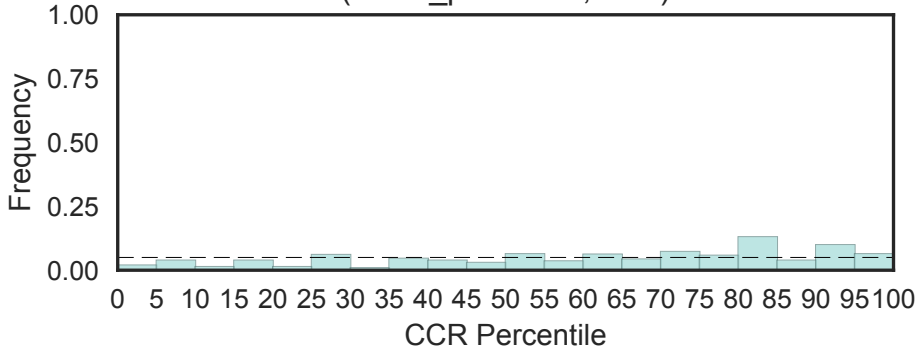

rRNA processing  
(rRNA\_processing, N=1)

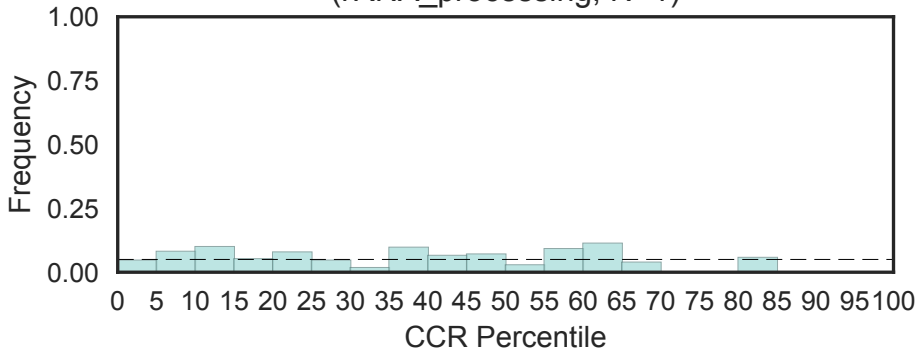

Ribosomal proteins 50S L24/mitochondrial 39S L24  
(ribosomal\_L24, N=1)

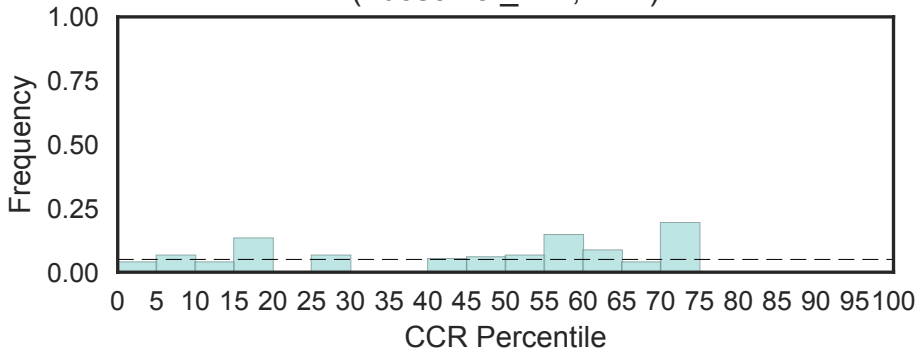

Tumour necrosis factor receptor stn\_TNFRSF12A\_TNFR domain  
(stn\_TNFRSF12A, N=1)

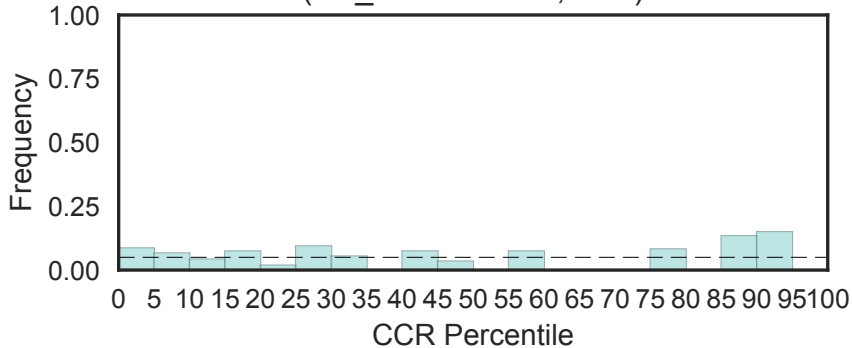

tRNA synthetases class I (I, L, M and V)  
(tRNA-synt\_1, N=11)

Fisher's OR: 0.226; Bonferroni p-val: 1

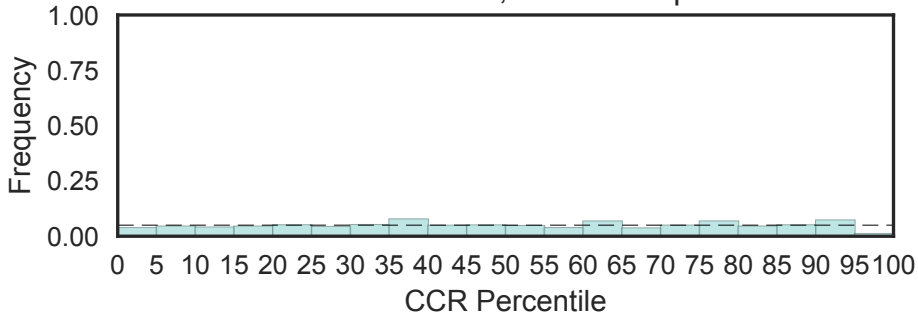

Leucyl-tRNA synthetase, Domain 2  
(tRNA-synt\_1\_2, N=3)

Fisher's OR: 0; Bonferroni p-val: 1

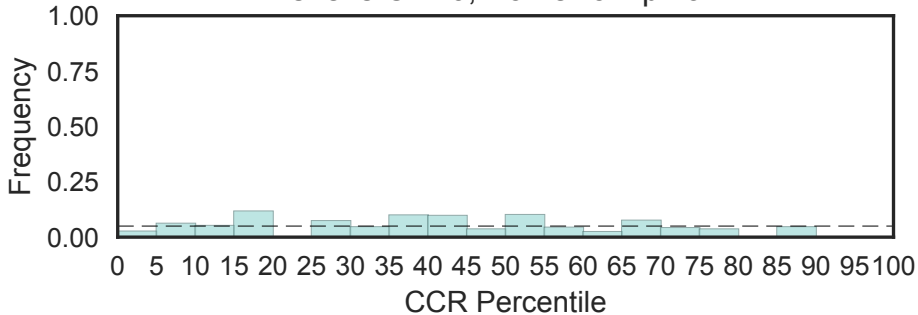



tRNA synthetases class I (W and Y)  
(tRNA-synt\_1b, N=4)  
Fisher's OR: 0.251; Bonferroni p-val: 1

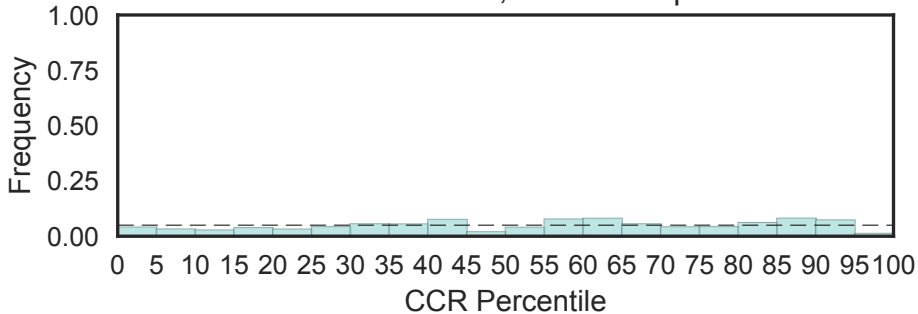

tRNA synthetases class I (E and Q), catalytic domain  
(tRNA-synt\_1c, N=4)

Fisher's OR: 0.287; Bonferroni p-val: 1

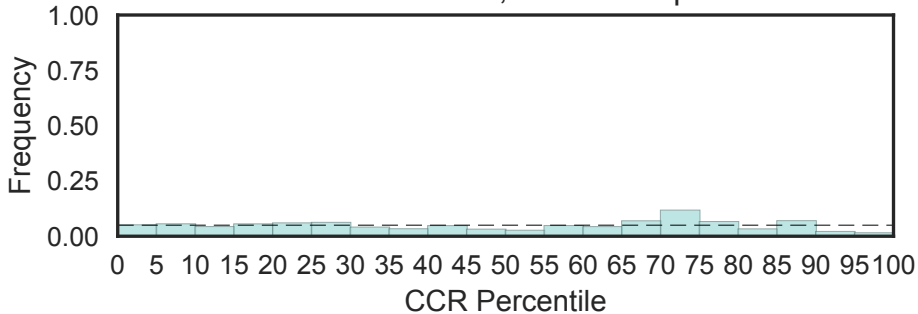

tRNA synthetases class I (E and Q), anti-codon binding domain  
(tRNA-synt\_1c\_C, N=2)

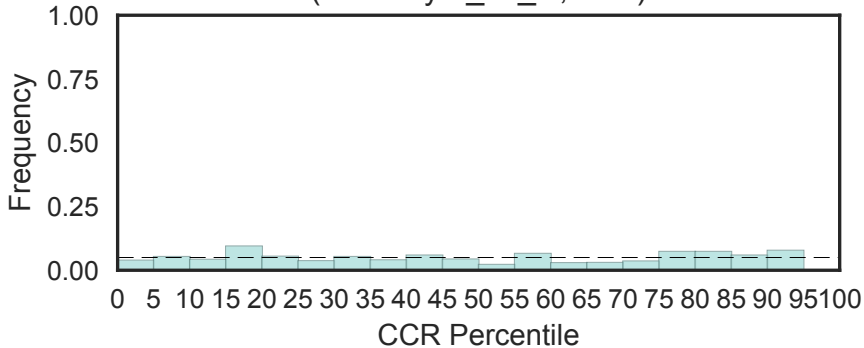

tRNA synthetases class I (R)  
(tRNA-synt\_1d, N=2)

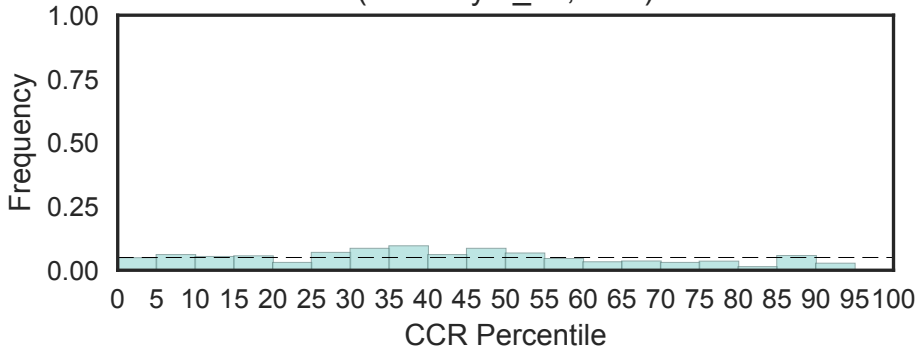

tRNA synthetases class I (C) catalytic domain  
(tRNA-synt\_1e, N=3)

Fisher's OR: 0.334; Bonferroni p-val: 1

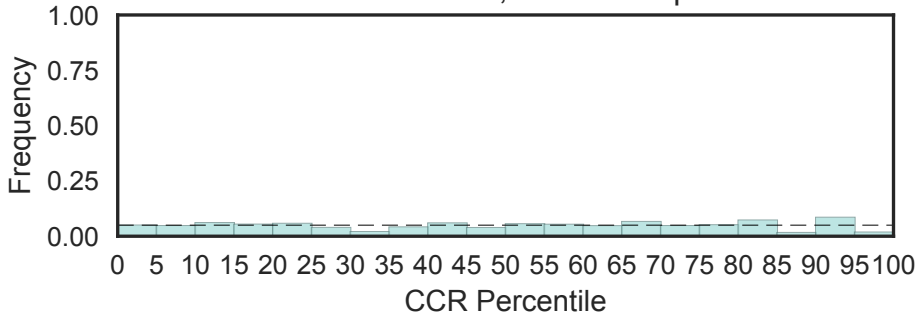

tRNA synthetases class I (M)

(tRNA-synt\_1g, N=12)

Fisher's OR: 0.174; Bonferroni p-val: 1

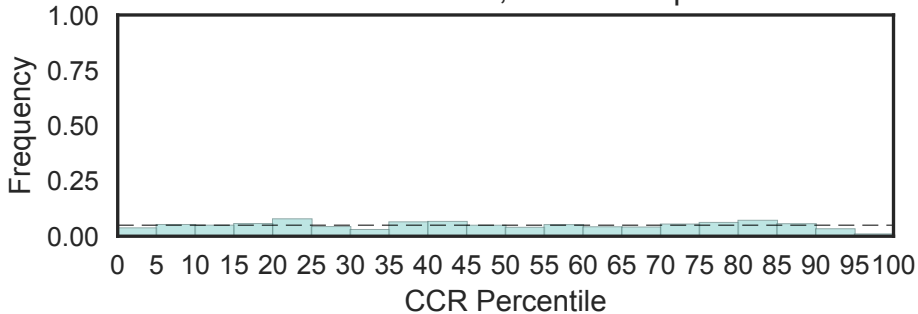

tRNA synthetases class II (D, K and N)  
(tRNA-synt\_2, N=5)

Fisher's OR: 0.153; Bonferroni p-val: 1

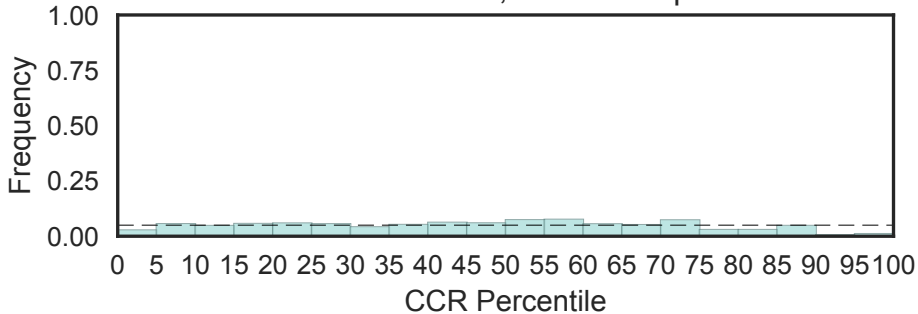

tRNA synthetase class II core domain (G, H, P, S and T)  
(tRNA-synt\_2b, N=9)

Fisher's OR: 0.778; Bonferroni p-val: 1

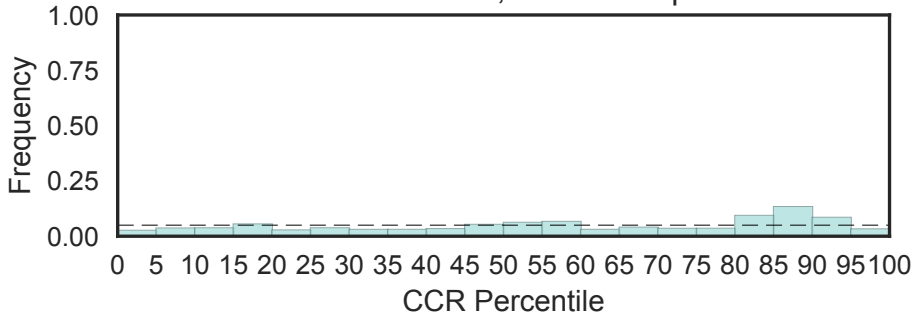



# tRNA synthetases class II (A)

(tRNA-synt\_2c, N=6)

Fisher's OR: 0; Bonferroni p-val: 1

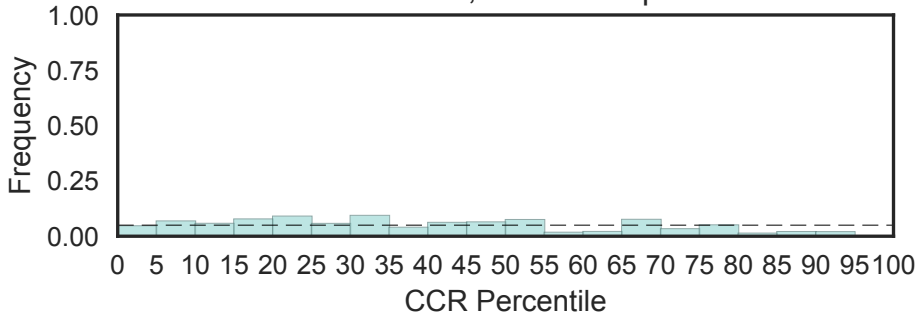

# tRNA synthetases class II core domain (F)

(tRNA-synt\_2d, N=3)

Fisher's OR: 0; Bonferroni p-val: 1

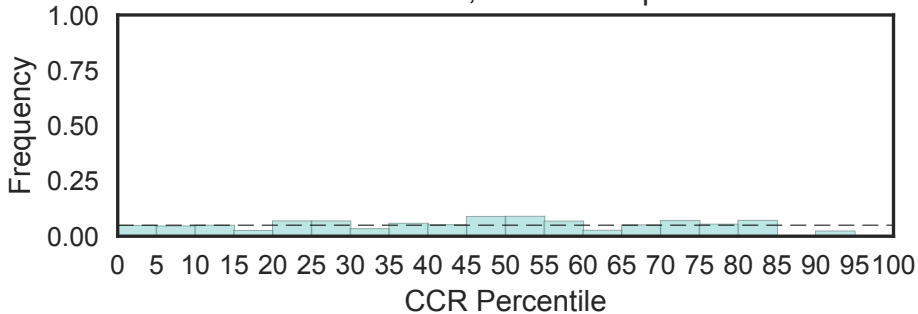

Histidyl-tRNA synthetase  
(tRNA-synt\_His, N=3)

Fisher's OR: 0; Bonferroni p-val: 1

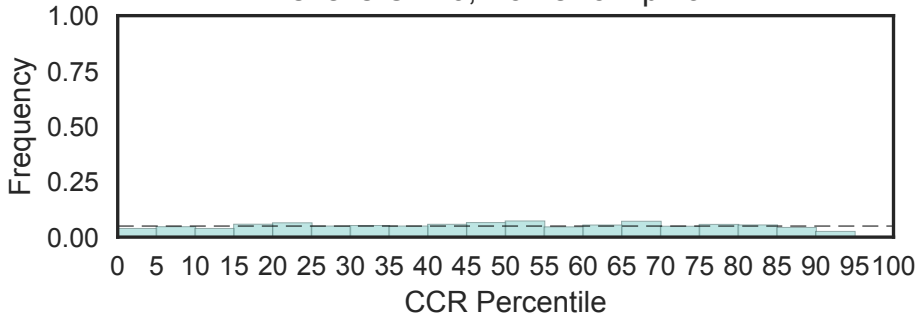

tRNA methyl transferase  
(tRNA\_Me\_trans, N=2)

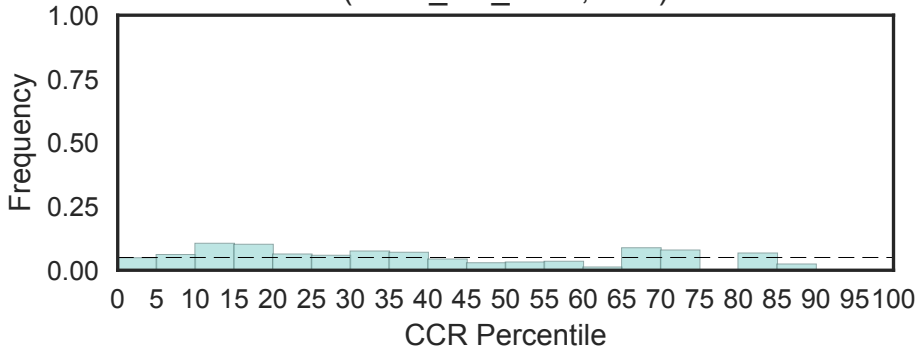

Threonyl and Alanyl tRNA synthetase second additional domain  
(tRNA\_SAD, N=7)

Fisher's OR: 0; Bonferroni p-val: 1

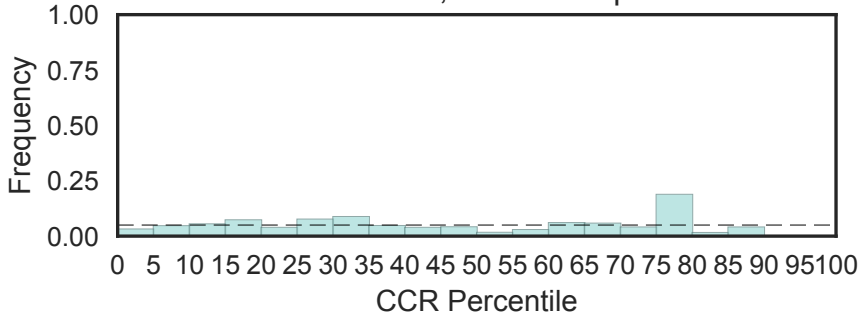

tRNA (Uracil-5-)-methyltransferase  
(tRNA\_U5-meth\_tr, N=1)

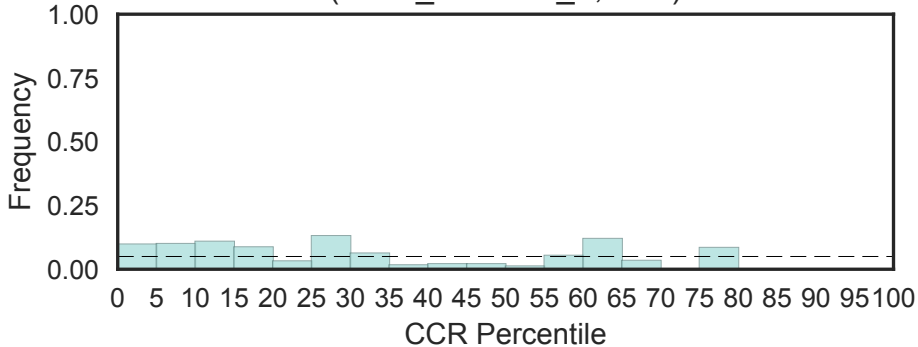

OB-fold nucleic acid binding domain  
(tRNA\_anti-codon, N=8)  
Fisher's OR: 0.432; Bonferroni p-val: 1

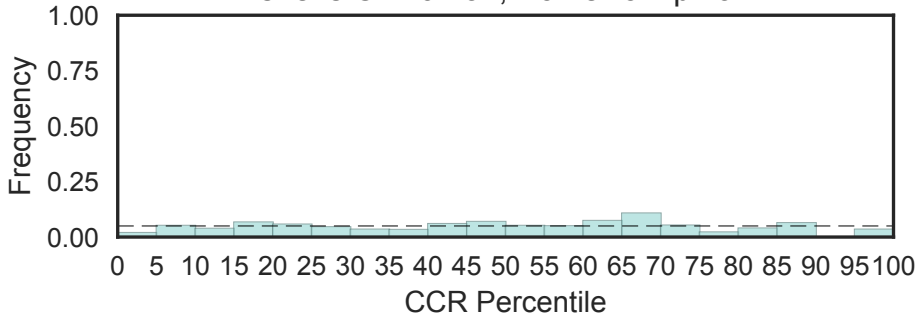

Putative tRNA binding domain  
(tRNA\_bind, N=2)

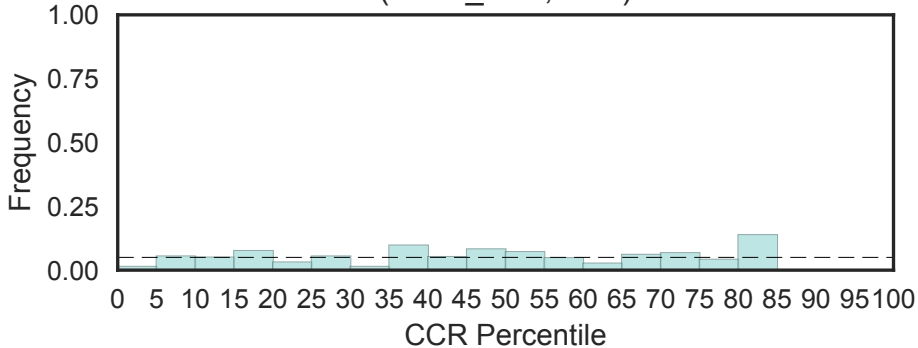



Possible tRNA binding domain  
(tRNA\_bind\_2, N=1)

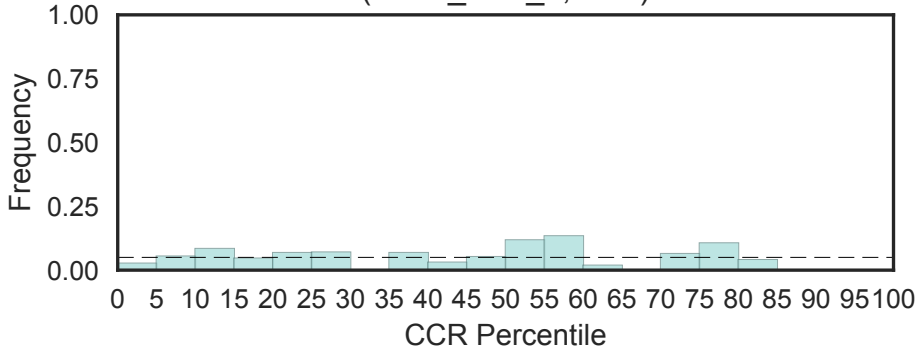

tRNA-splicing endonuclease subunit sen54 N-term  
(tRNA\_int\_end\_N2, N=1)

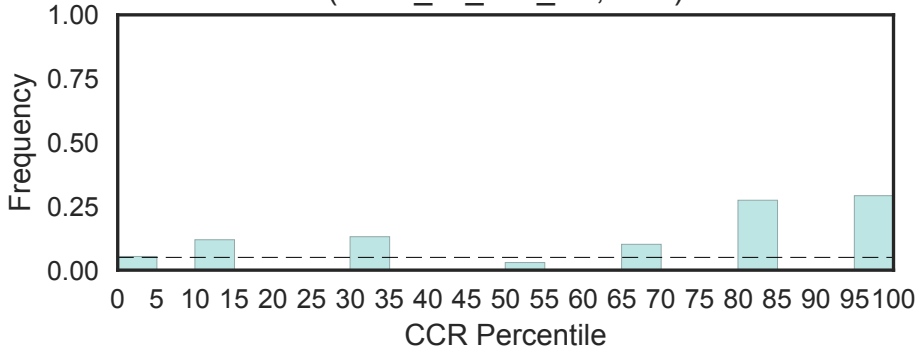

tRNA intron endonuclease, catalytic C-terminal domain  
(tRNA\_int\_endo, N=2)

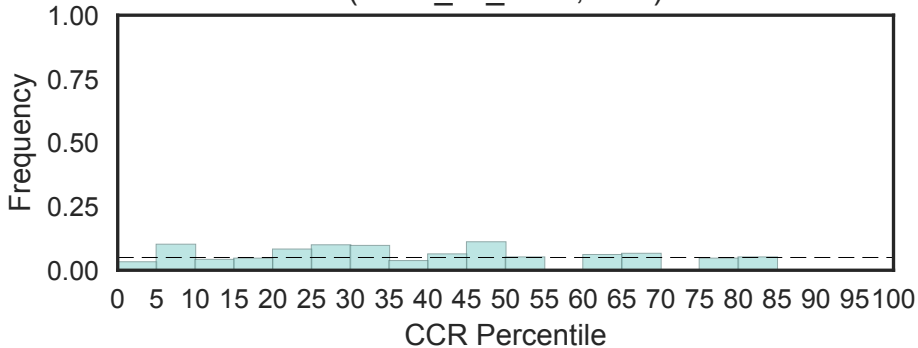

tRNA intron endonuclease, N-terminal domain  
(tRNA\_int\_endo\_N, N=1)

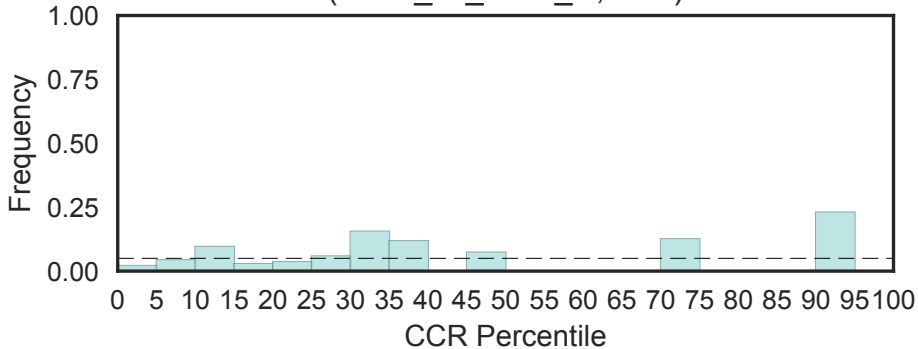

tRNA (Guanine-1)-methyltransferase  
(tRNA\_m1G\_MT, N=3)

Fisher's OR: 0; Bonferroni p-val: 1

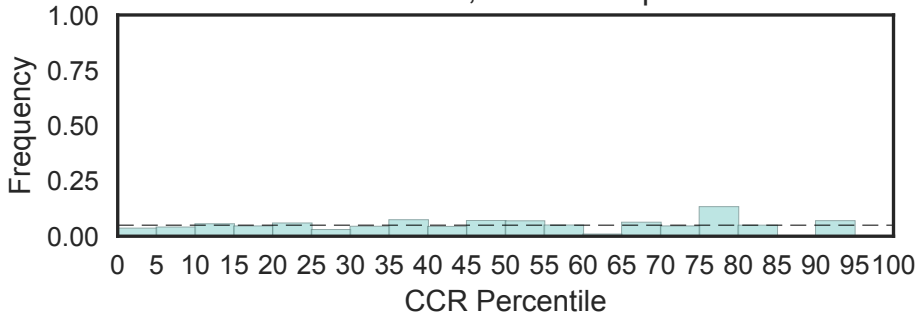

Glutaminyl-tRNA synthetase, non-specific RNA binding region part 1  
(tRNA\_synt\_1c\_R1, N=1)

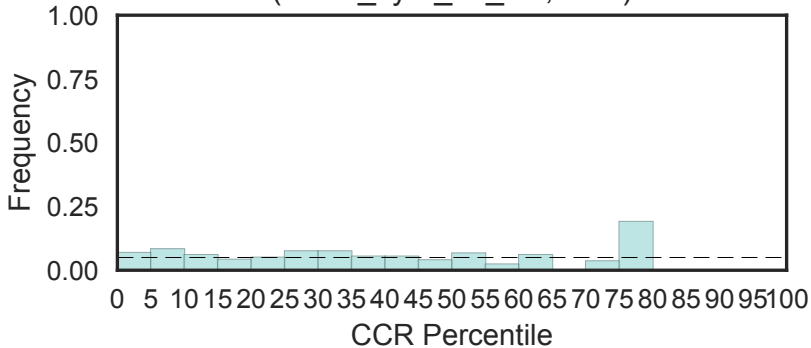

Glutaminyl-tRNA synthetase, non-specific RNA binding region part 2  
(tRNA\_synt\_1c\_R2, N=1)

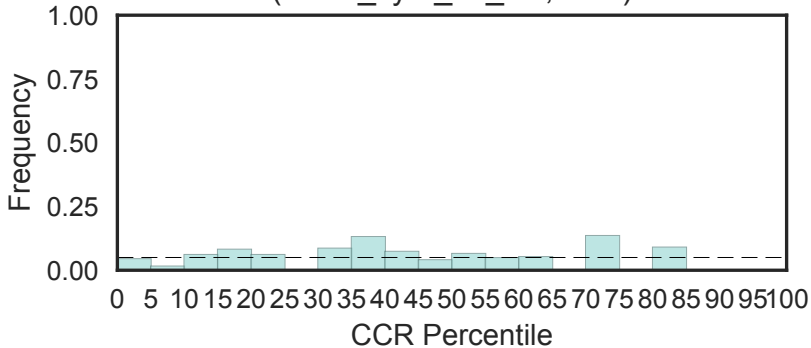

uDENN domain  
(uDENN, N=16)

Fisher's OR: 0.326; Bonferroni p-val: 1

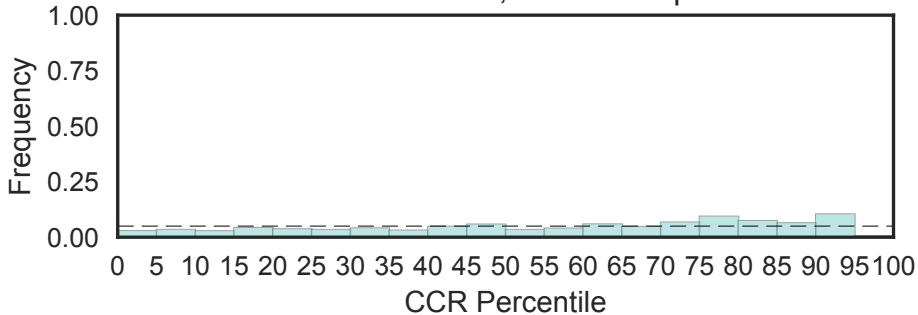



Ubiquitin family  
(ubiquitin, N=63)

Fisher's OR: 2.03; Bonferroni p-val: 1

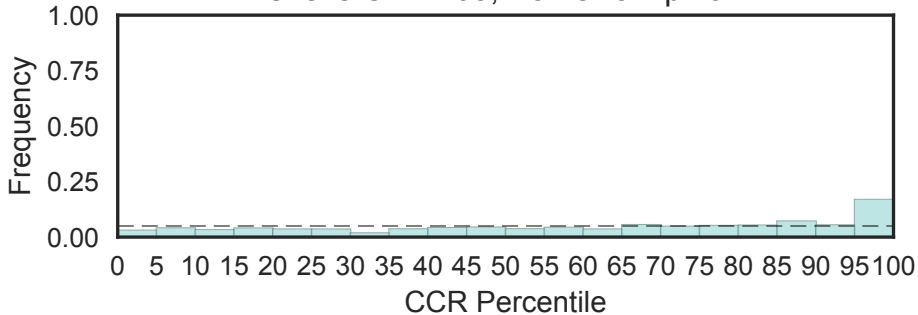

ATP synthase (C/AC39) subunit  
(vATP-synt\_AC39, N=2)

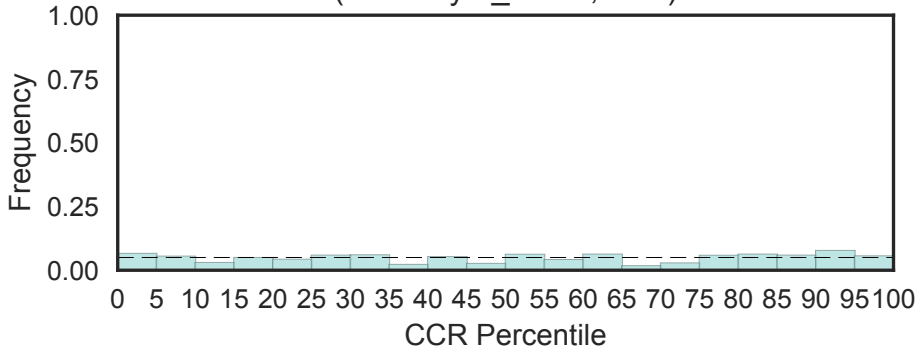

ATP synthase (E/31 kDa) subunit  
(vATP-synt\_E, N=2)

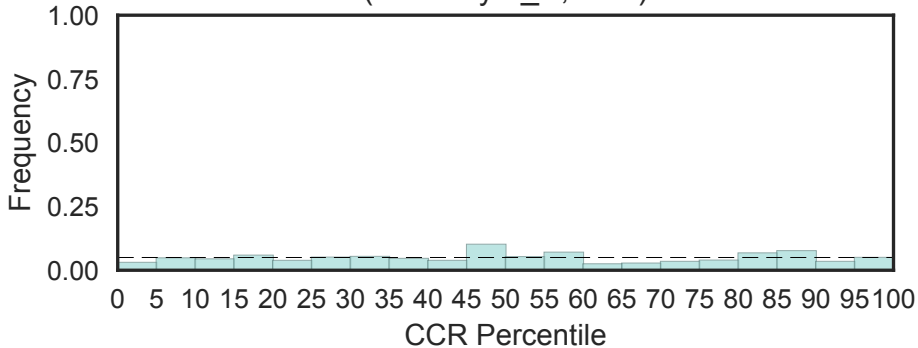

vWA found in TerF C terminus  
(vWA-TerF-like, N=1)

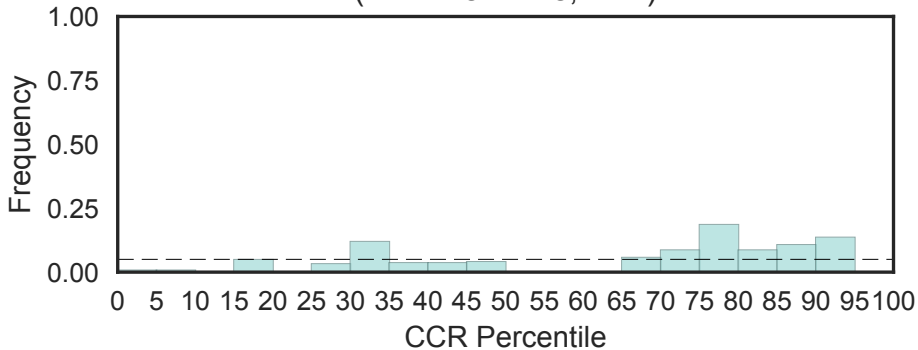

wnt family  
(wnt, N=19)

Fisher's OR: 0.473; Bonferroni p-val: 1

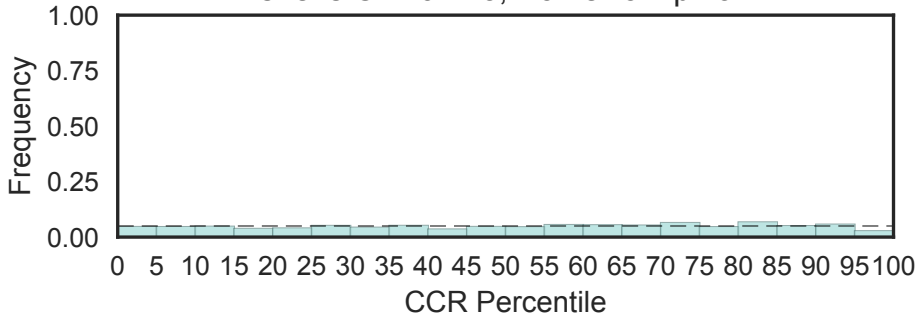

Adenosine deaminase z-alpha domain  
(z-alpha, N=4)

Fisher's OR: 0; Bonferroni p-val: 1

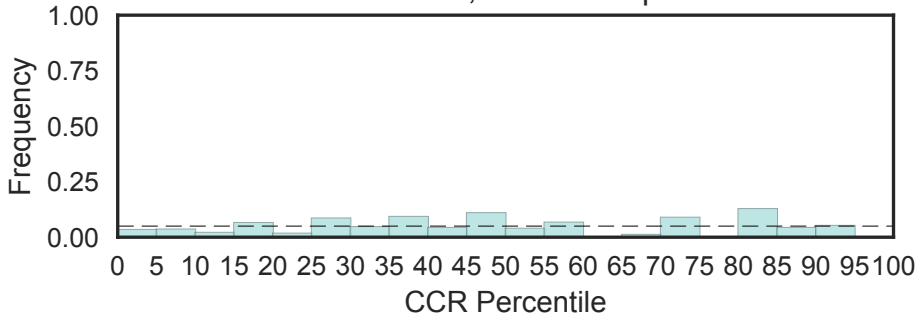

Zinc-binding domain  
(zf-3CxxC, N=7)

Fisher's OR: 0; Bonferroni p-val: 1

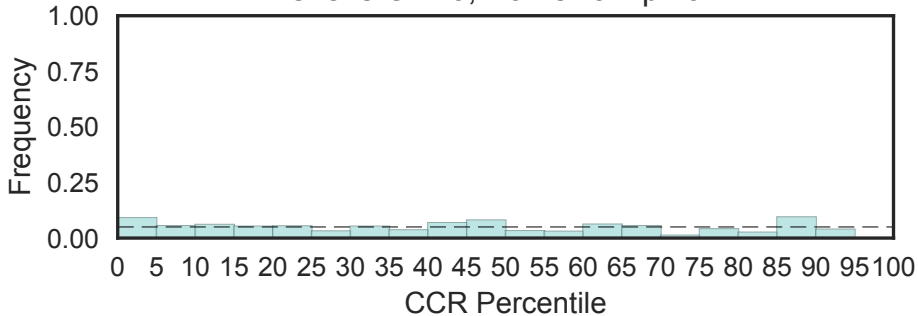

Zinc-binding domain  
(zf-3CxxC\_2, N=1)

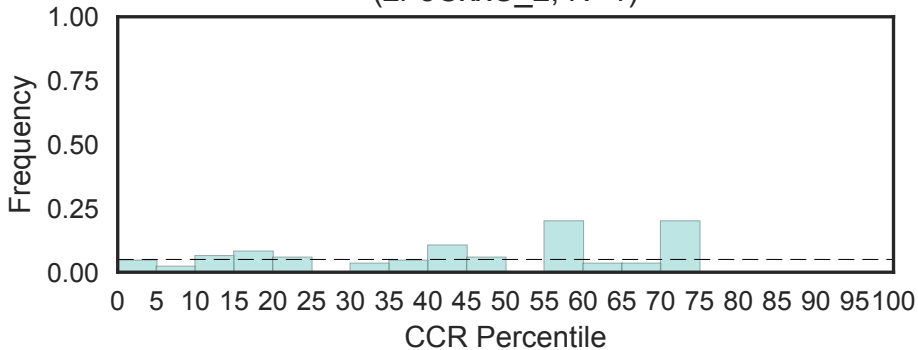



Zinc-finger domain of monoamine-oxidase A repressor R1  
(zf-4CXXC\_R1, N=2)

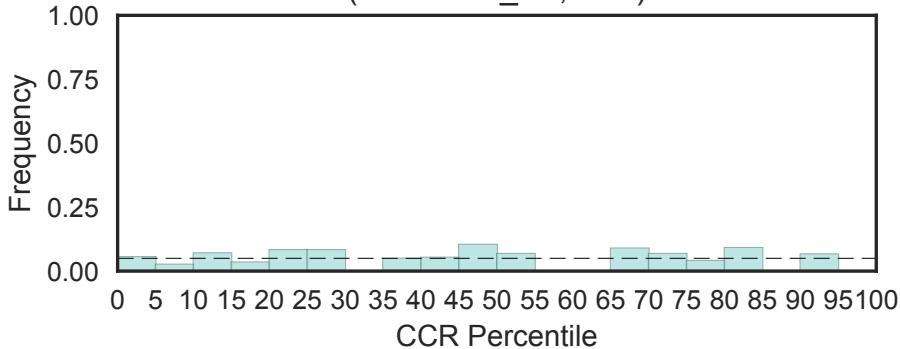

A20-like zinc finger  
(zf-A20, N=11)

Fisher's OR: 0; Bonferroni p-val: 1

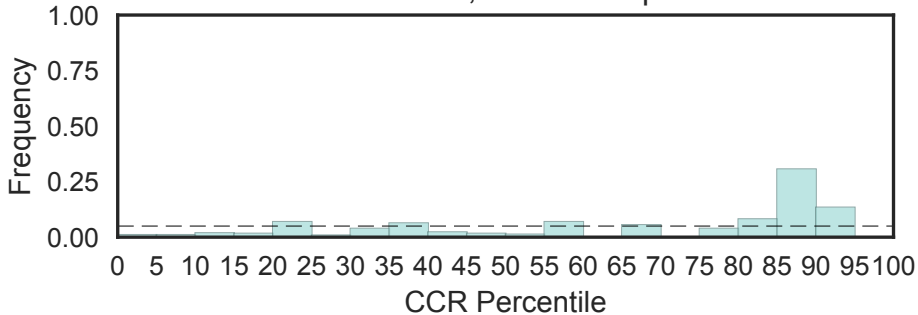

Zinc-finger associated domain (zf-AD)  
(zf-AD, N=1)

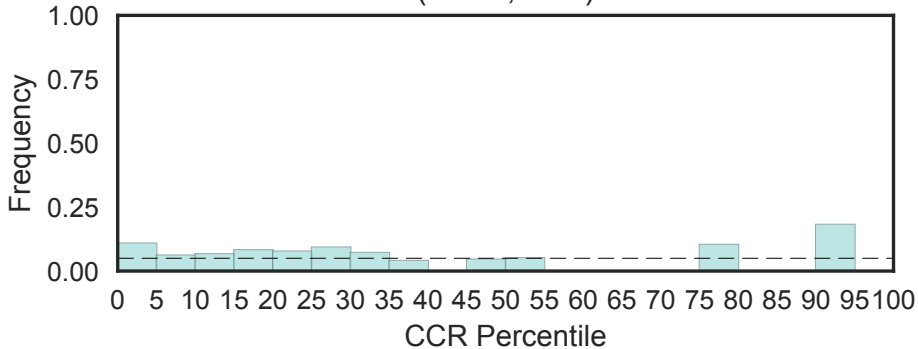

AN1-like Zinc finger  
(zf-AN1, N=11)

Fisher's OR: 0; Bonferroni p-val: 1

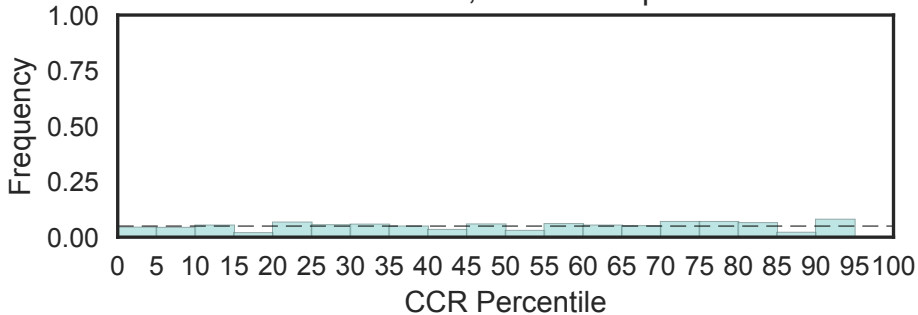

Anaphase-promoting complex subunit 11 RING-H2 finger  
(zf-ANAPC11, N=11)

Fisher's OR: 4.53; Bonferroni p-val: 1

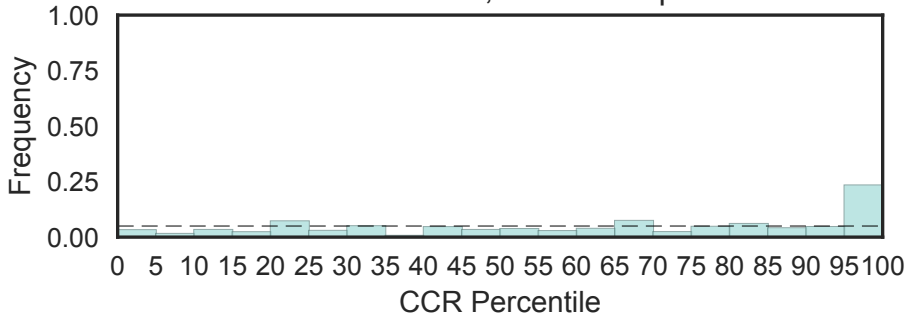

BED zinc finger  
(zf-BED, N=9)

Fisher's OR: 0.924; Bonferroni p-val: 1

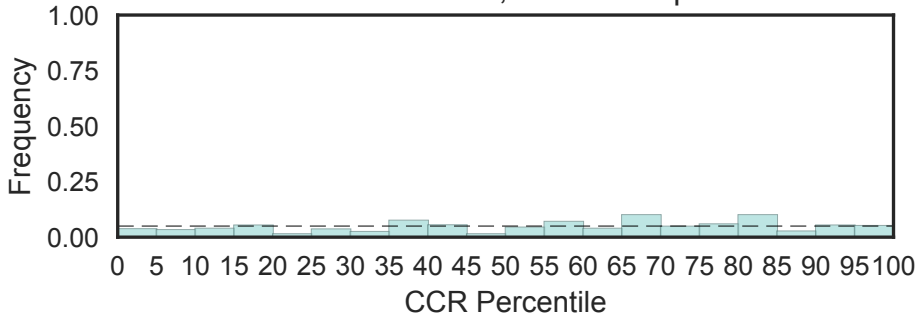

B-box zinc finger  
(zf-B\_box, N=72)

Fisher's OR: 0.628; Bonferroni p-val: 1

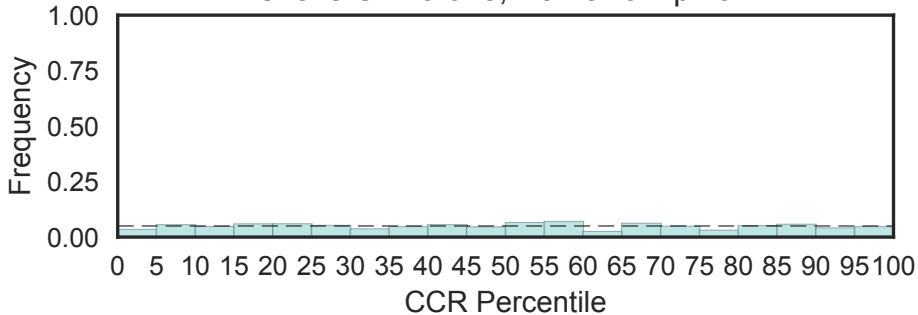

Zinc finger, C2H2 type  
(zf-C2H2, N=5341)

Fisher's OR: 0.992; Bonferroni p-val: 1

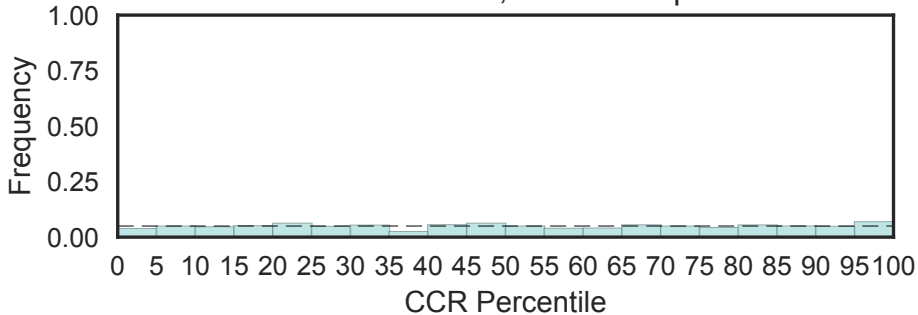



zinc-finger C2H2-type  
(zf-C2H2\_11, N=21)

Fisher's OR: 0; Bonferroni p-val: 1

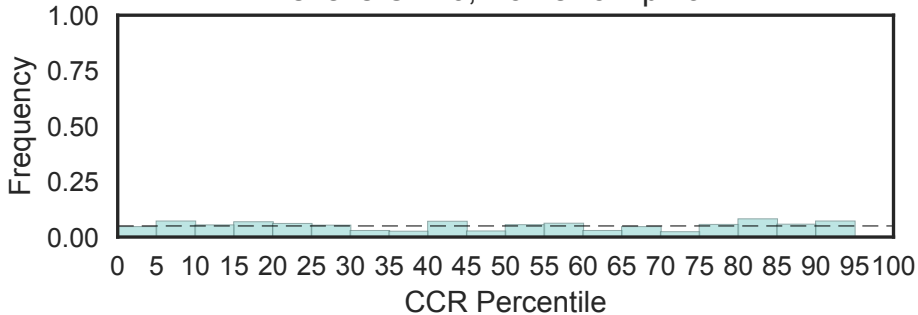

C2H2 type zinc-finger (2 copies)  
(zf-C2H2\_2, N=9)

Fisher's OR: 2.5; Bonferroni p-val: 1

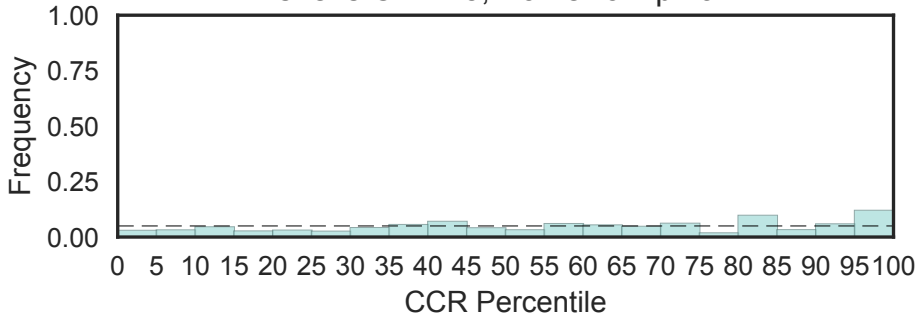

zinc-finger of acetyl-transferase ESCO  
(zf-C2H2\_3, N=2)

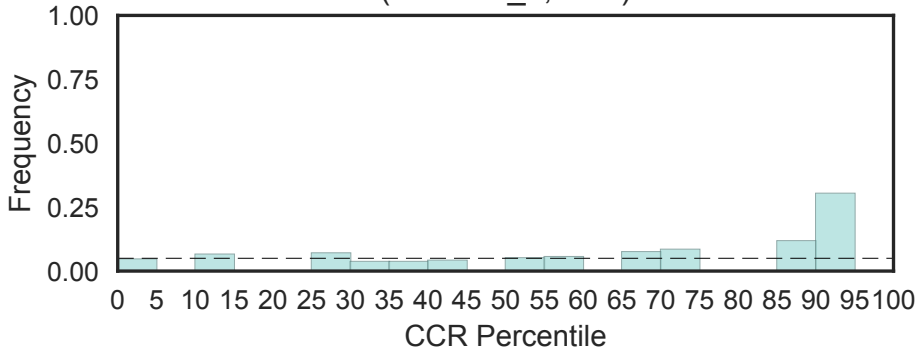

C2H2-type zinc finger  
(zf-C2H2\_4, N=574)

Fisher's OR: 1.73; Bonferroni p-val: 0.227

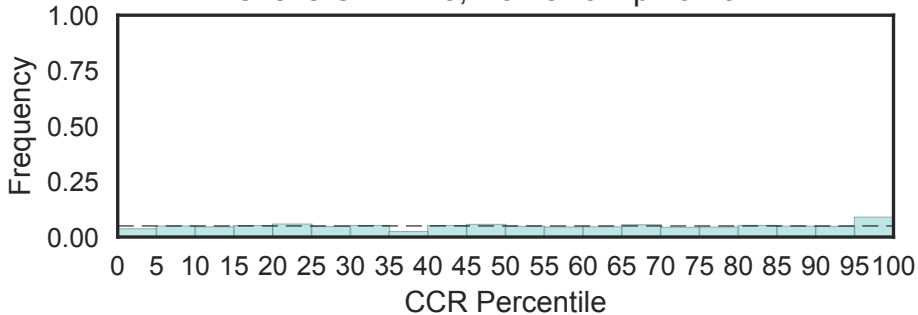

C2H2-type zinc finger  
(zf-C2H2\_6, N=1717)

Fisher's OR: 0.711; Bonferroni p-val: 1

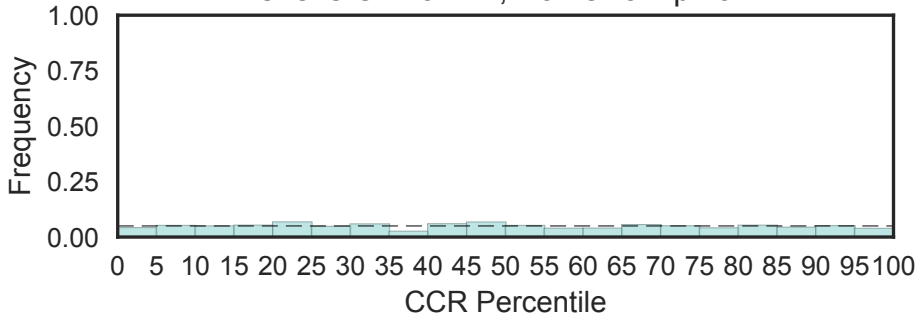

Zinc-finger  
(zf-C2H2\_7, N=2)

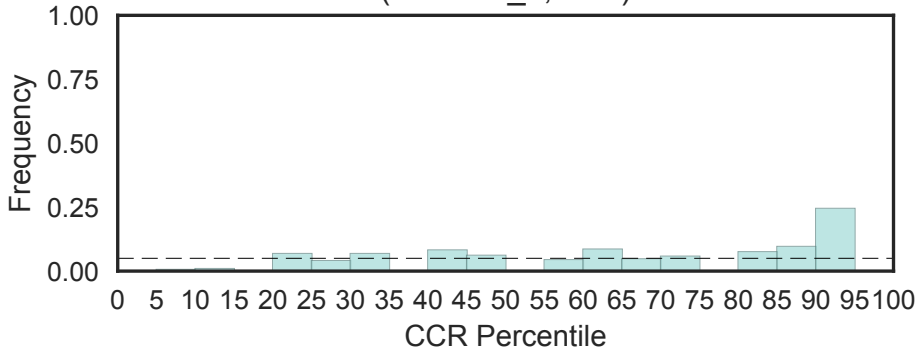

C2H2-type zinc ribbon  
(zf-C2H2\_8, N=1)

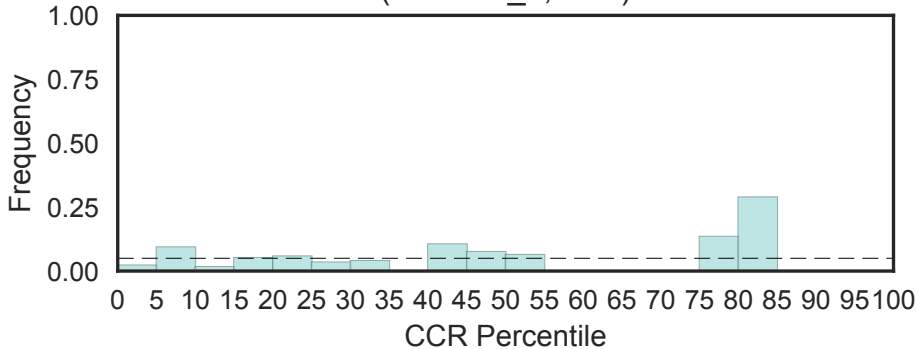

Unstructured conserved, between two C2H2-type zinc-fingers  
(zf-C2H2\_assoc, N=1)

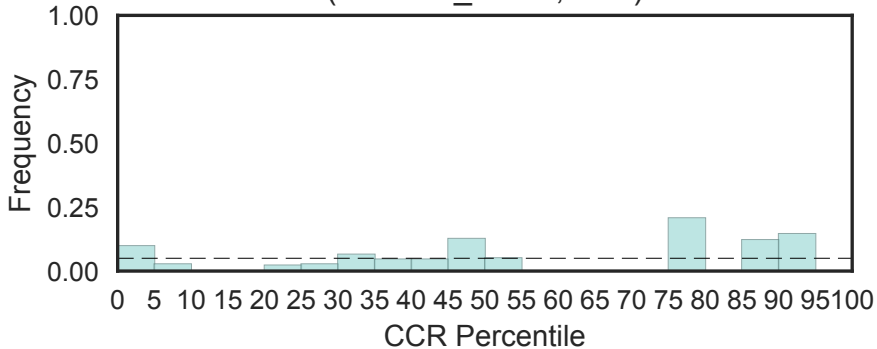



Unstructured region upstream of a zinc-finger  
(zf-C2H2\_assoc2, N=1)

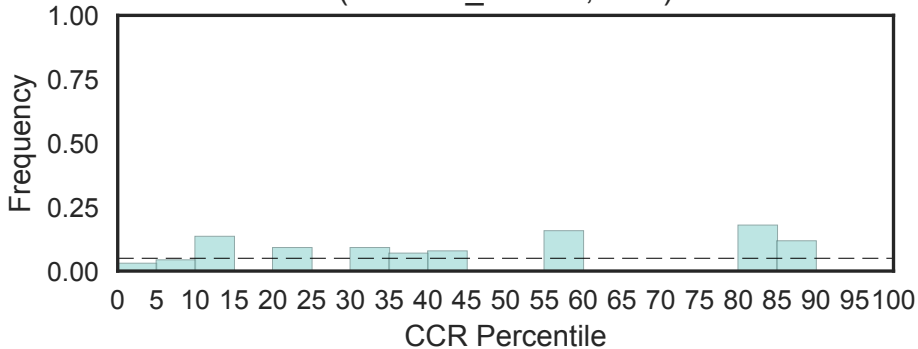

Putative zinc-finger between two C2H2 zinc-fingers on Patz  
(zf-C2H2\_assoc3, N=1)

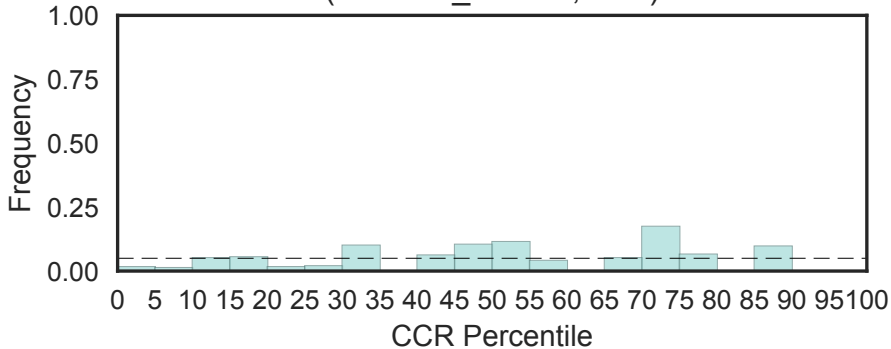

Zinc-finger double-stranded RNA-binding  
(zf-C2H2\_jaz, N=28)

Fisher's OR: 2.47; Bonferroni p-val: 1

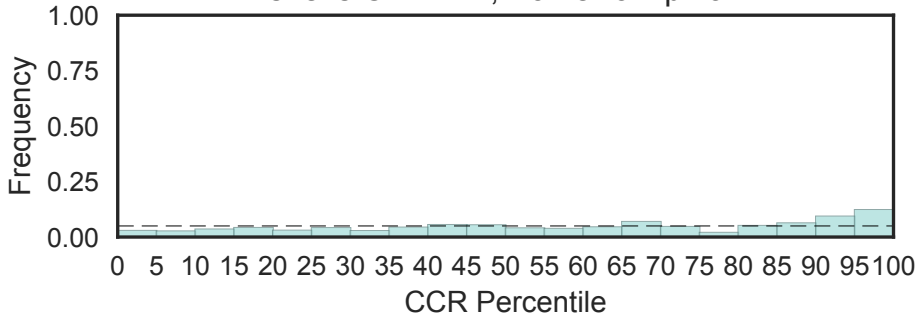

Zinc finger, C2HC type  
(zf-C2HC, N=22)

Fisher's OR: 4.16; Bonferroni p-val: 1

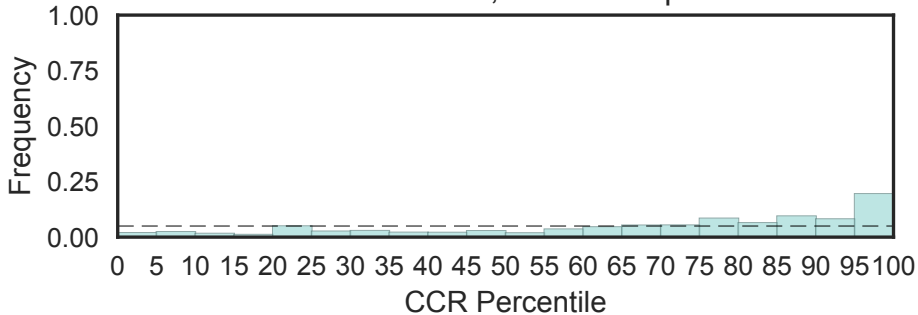

Putative zinc finger motif, C2HC5-type  
(zf-C2HC5, N=1)

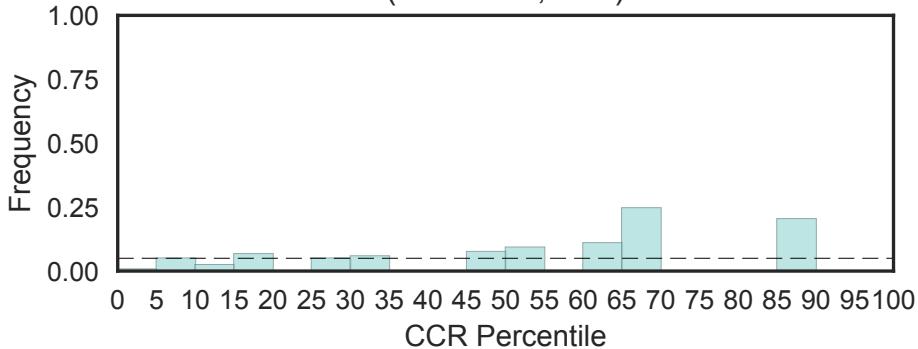

zinc-finger of a C2HC-type  
(zf-C2HC\_2, N=121)

Fisher's OR: 2.62; Bonferroni p-val: 1

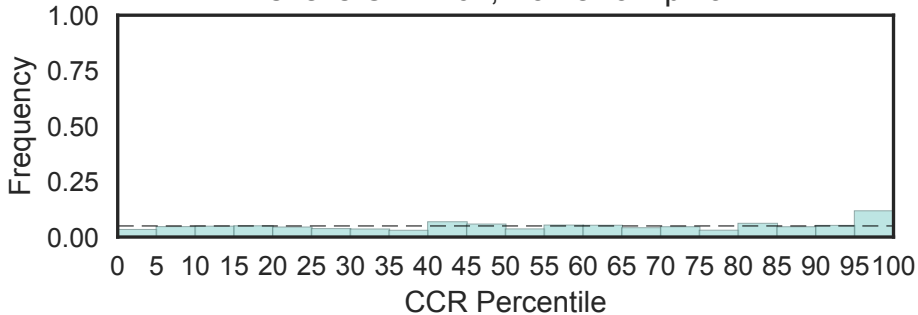

C2HE / C2H2 / C2HC zinc-binding finger  
(zf-C2HE, N=1)

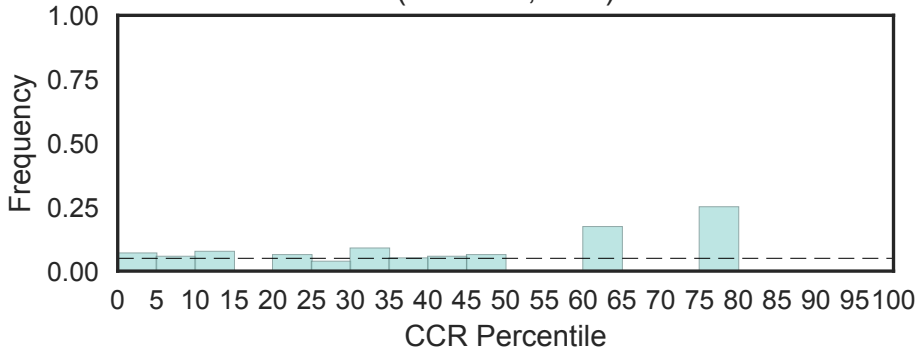

Putative zinc-finger domain  
(zf-C3H1, N=1)

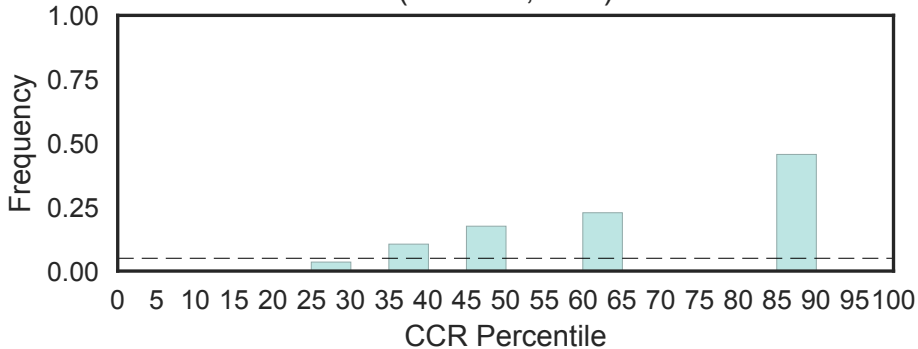



C3HC zinc finger-like  
(zf-C3HC, N=1)

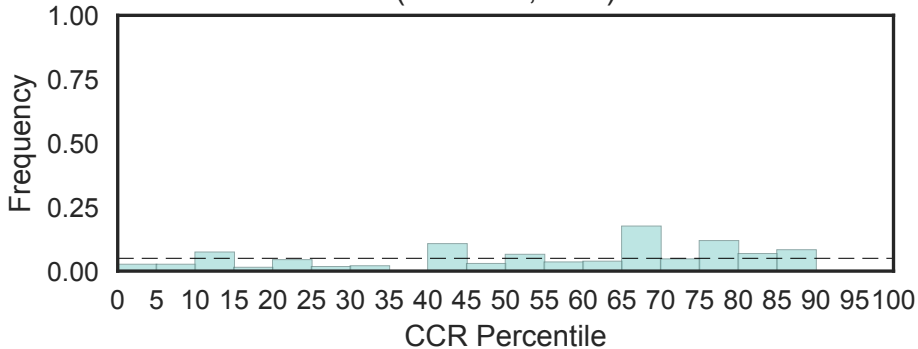

Zinc finger, C3HC4 type (RING finger)  
(zf-C3HC4, N=181)

Fisher's OR: 2.25; Bonferroni p-val: 0.0446

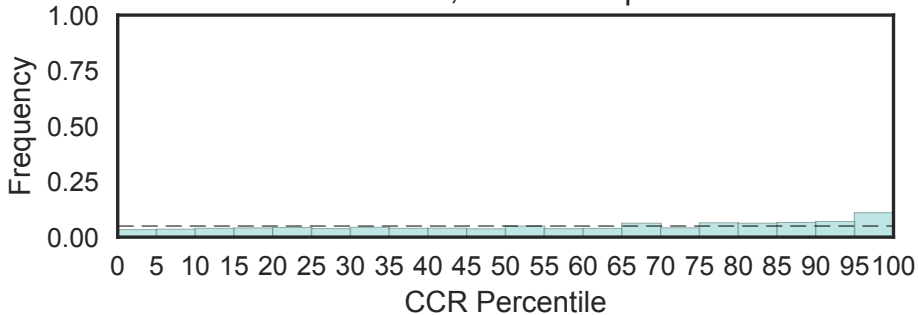

Zinc finger, C3HC4 type (RING finger)  
(zf-C3HC4\_2, N=129)

Fisher's OR: 2.67; Bonferroni p-val: 0.0042

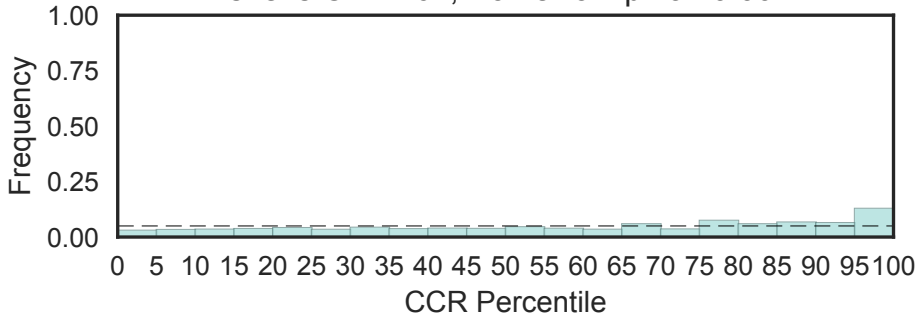

Zinc finger, C3HC4 type (RING finger)  
(zf-C3HC4\_3, N=106)

Fisher's OR: 3.19; Bonferroni p-val: 4.88e-05

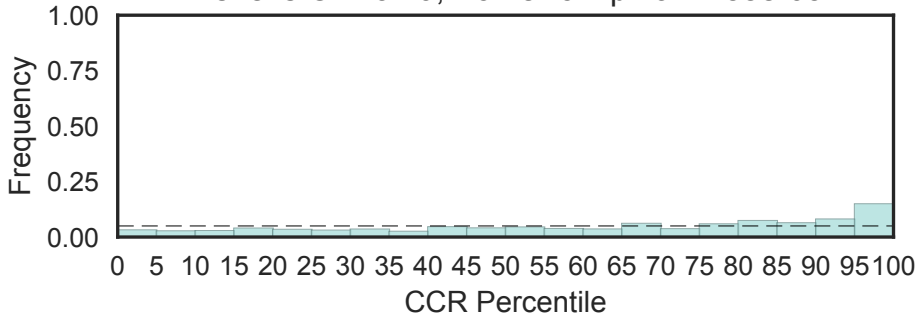

zinc finger of C3HC4-type, RING  
(zf-C3HC4\_4, N=57)

Fisher's OR: 1.01; Bonferroni p-val: 1

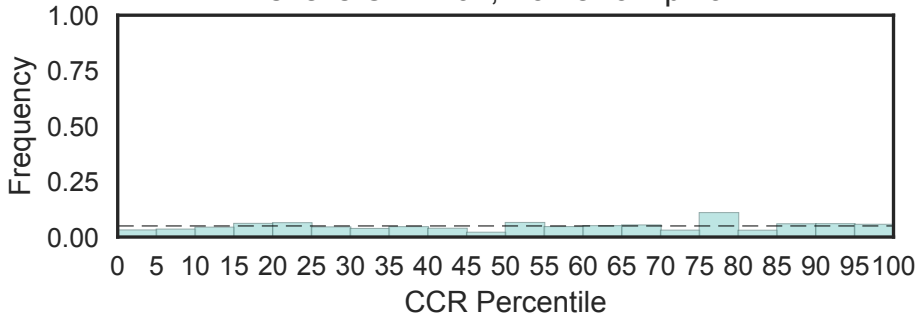

Zinc finger, C3HC4 type (RING finger)  
(zf-C3HC4\_5, N=1)

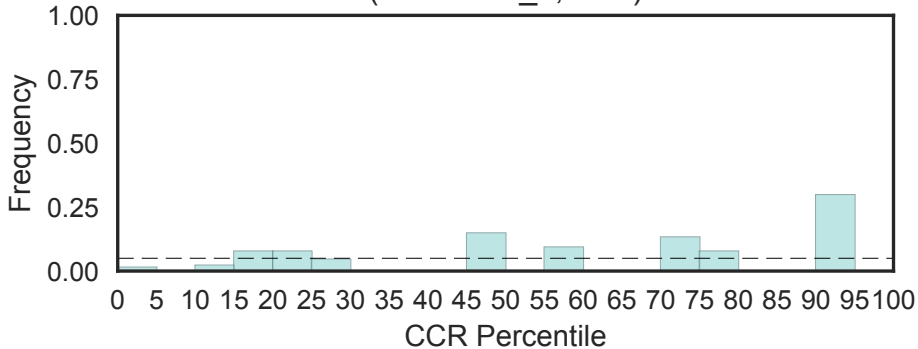

Potential DNA-binding domain  
(zf-C3Hc3H, N=4)

Fisher's OR: 2.51; Bonferroni p-val: 1

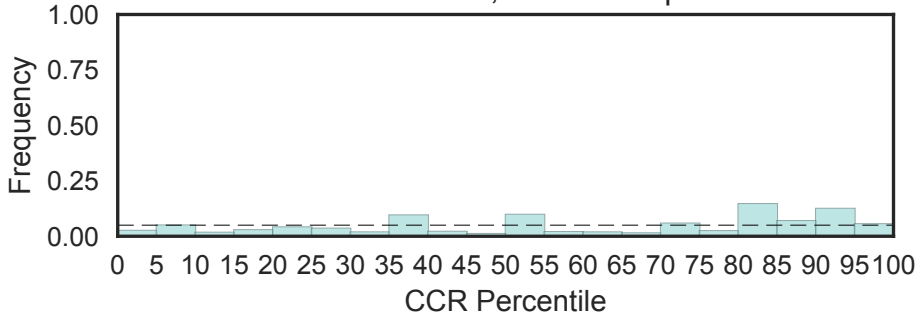

Zinc finger, C4 type (two domains)  
(zf-C4, N=45)

Fisher's OR: 7.85; Bonferroni p-val: 8.19e-23

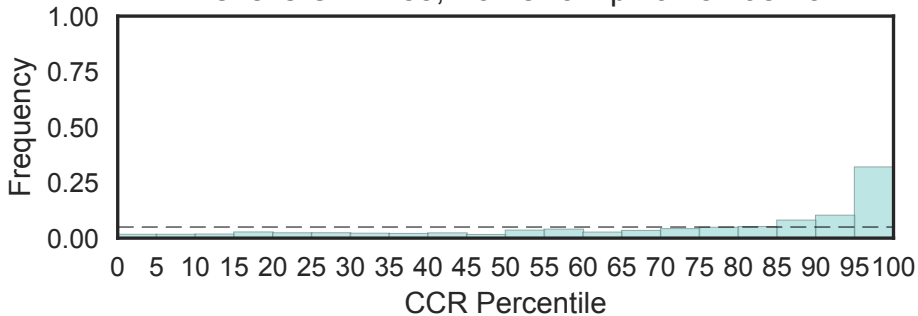



Topoisomerase DNA binding C4 zinc finger  
(zf-C4\_Topoisom, N=5)

Fisher's OR: 5.15; Bonferroni p-val: 1

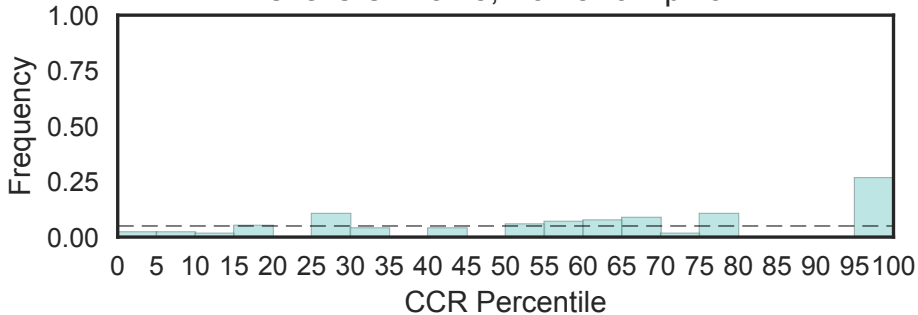

C4-type zinc-finger of DNA polymerase delta  
(zf-C4pol, N=3)

Fisher's OR: 2.04; Bonferroni p-val: 1

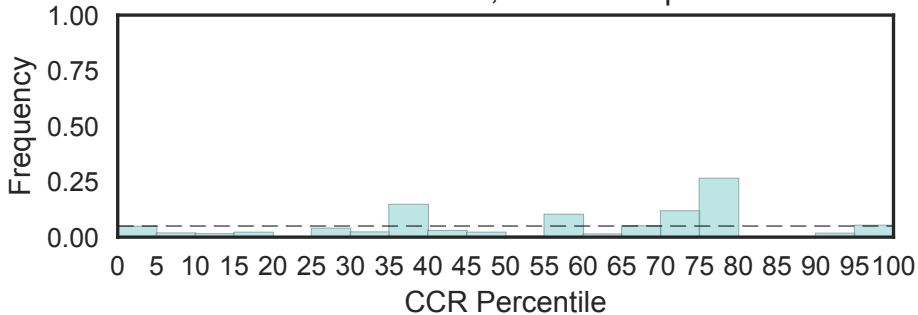

C5HC2 zinc finger  
(zf-C5HC2, N=3)

Fisher's OR: 5.41; Bonferroni p-val: 1

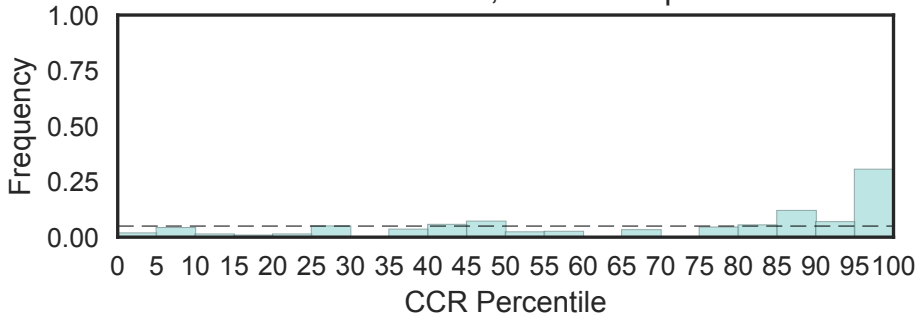

zf-MYND-like zinc finger, mRNA-binding  
(zf-C6H2, N=1)

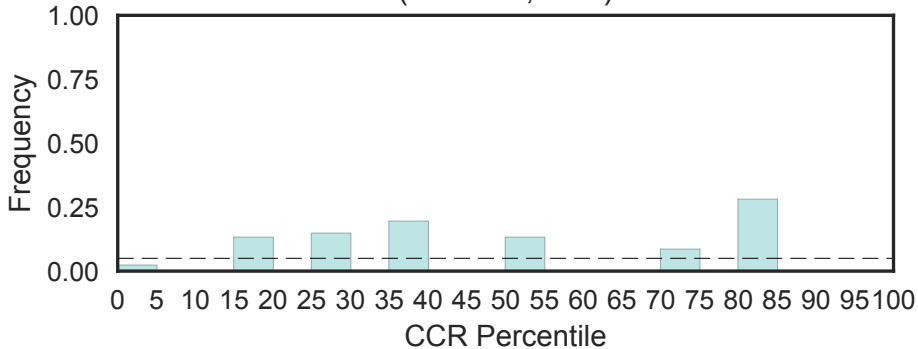

Zinc finger C-x8-C-x5-C-x3-H type (and similar)  
(zf-CCCH, N=52)

Fisher's OR: 4.86; Bonferroni p-val: 0.00729

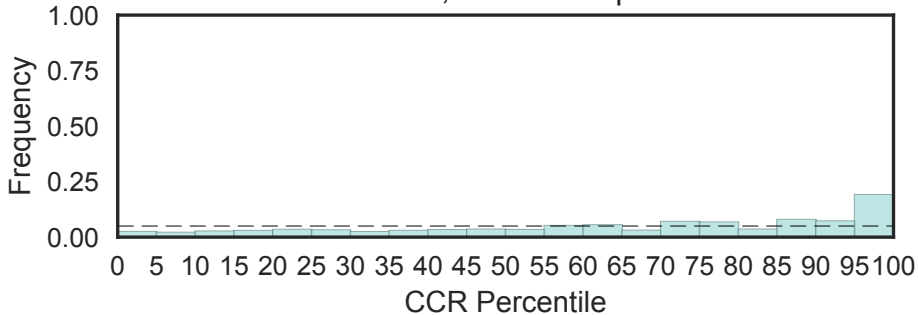

RNA-binding, Nab2-type zinc finger  
(zf-CCCH\_2, N=64)

Fisher's OR: 4.46; Bonferroni p-val: 0.0864

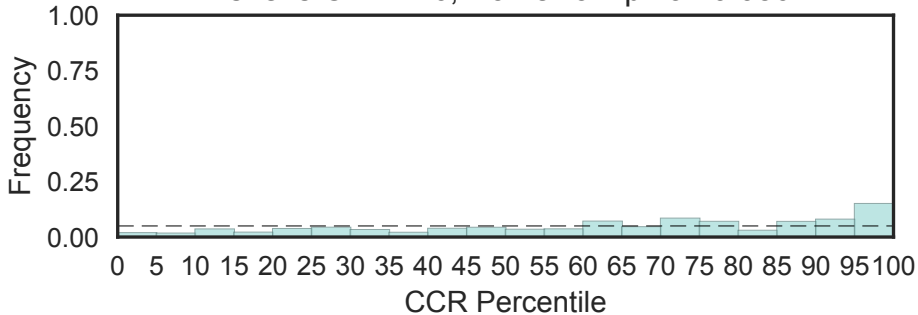

Zinc-finger containing family  
(zf-CCCH\_3, N=4)

Fisher's OR: 6.18; Bonferroni p-val: 1

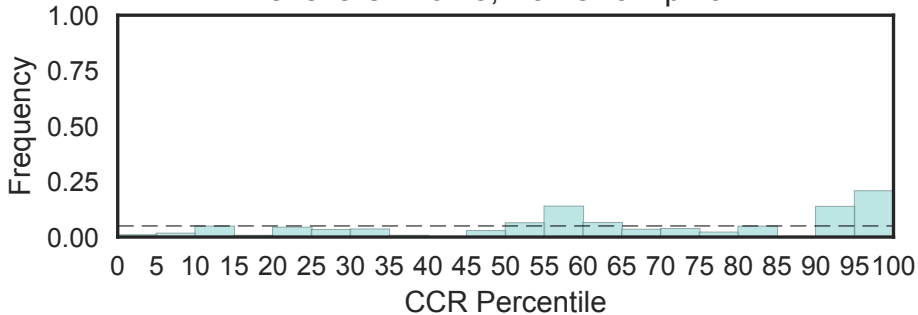

Zinc knuckle  
(zf-CCHC, N=31)

Fisher's OR: 5.05; Bonferroni p-val: 1

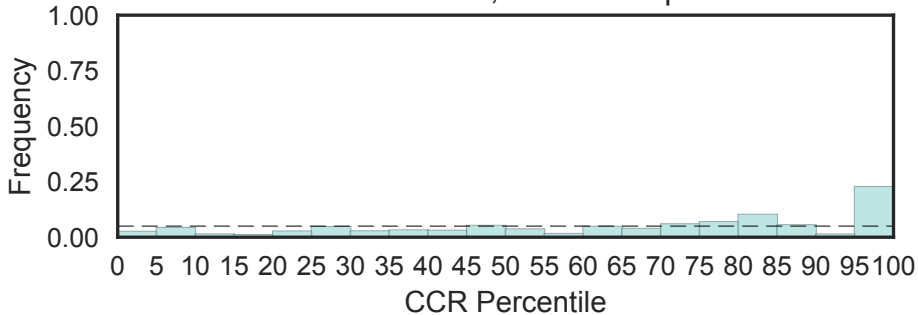



Zinc knuckle  
(zf-CCHC\_2, N=2)

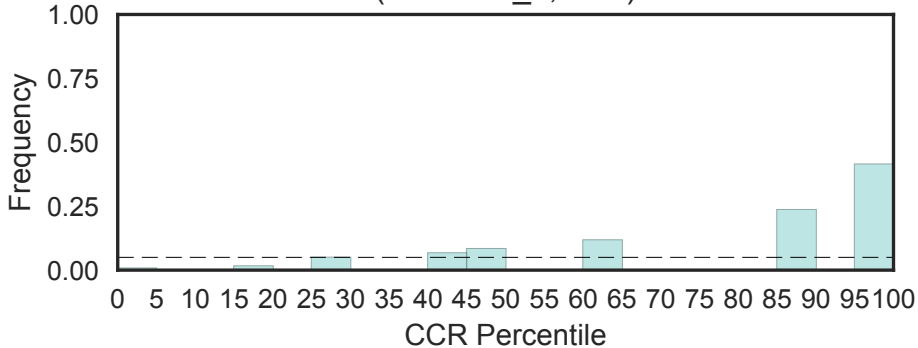

Zinc knuckle  
(zf-CCHC\_3, N=12)  
Fisher's OR: 2.77; Bonferroni p-val: 1

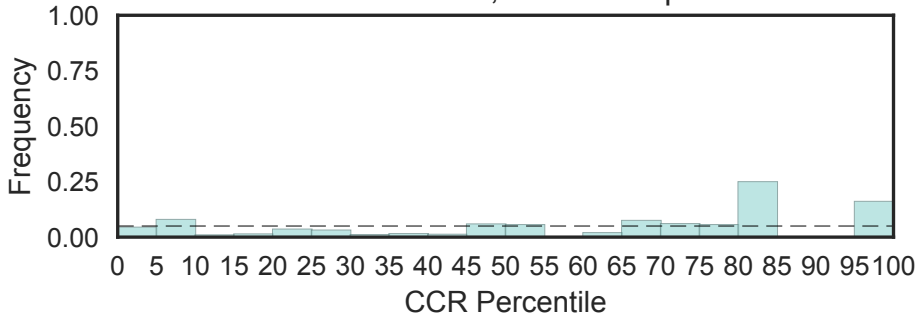

Zinc knuckle  
(zf-CCHC\_4, N=24)  
Fisher's OR: 4.1; Bonferroni p-val: 1

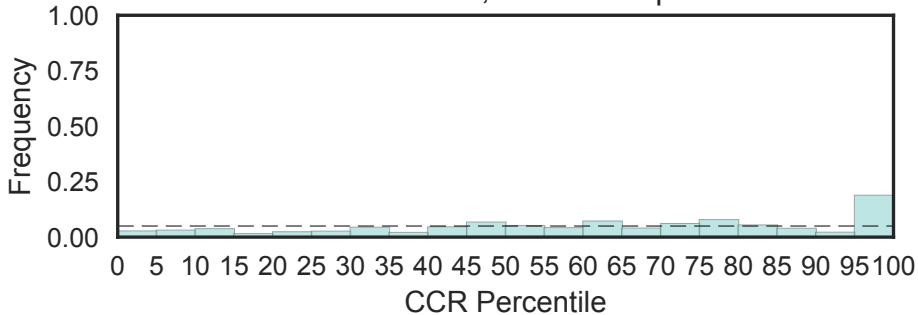

Zinc knuckle  
(zf-CCHC\_6, N=2)

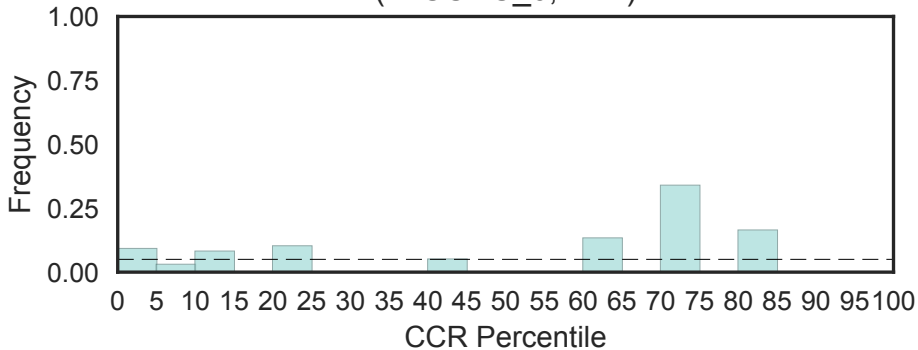

Zinc-finger (CX5CX6HX5H) motif  
(zf-CCHH, N=2)

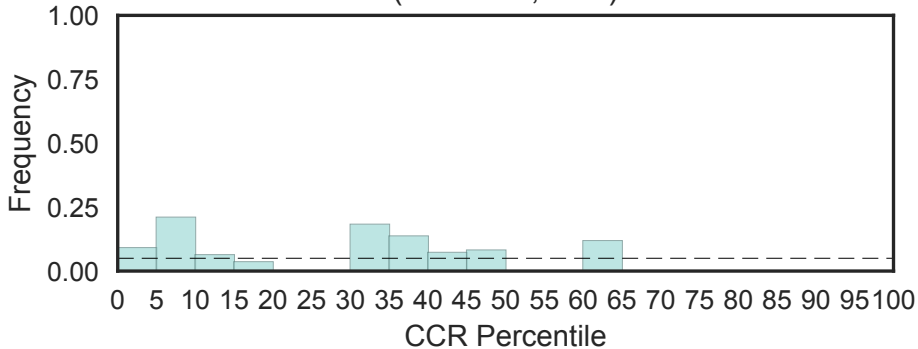

Iron-binding zinc finger CDGSH type  
(zf-CDGSH, N=4)

Fisher's OR: 27; Bonferroni p-val: 1

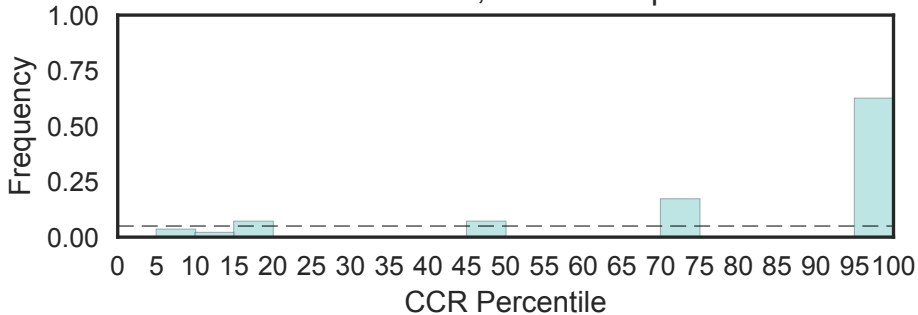

Zinc-finger domain  
(zf-CHCC, N=1)

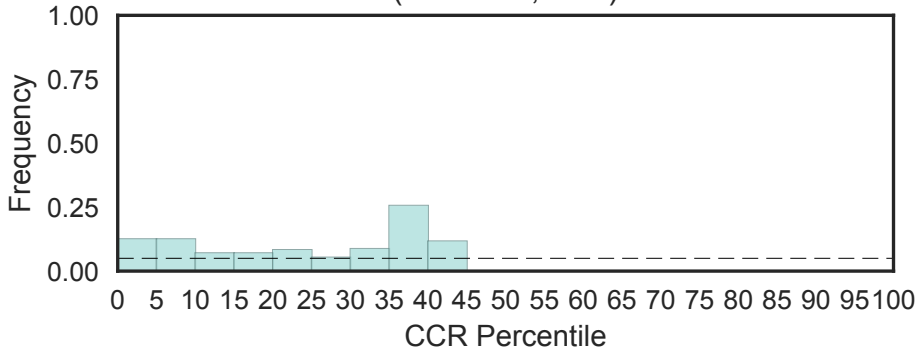

CHY zinc finger  
(zf-CHY, N=1)

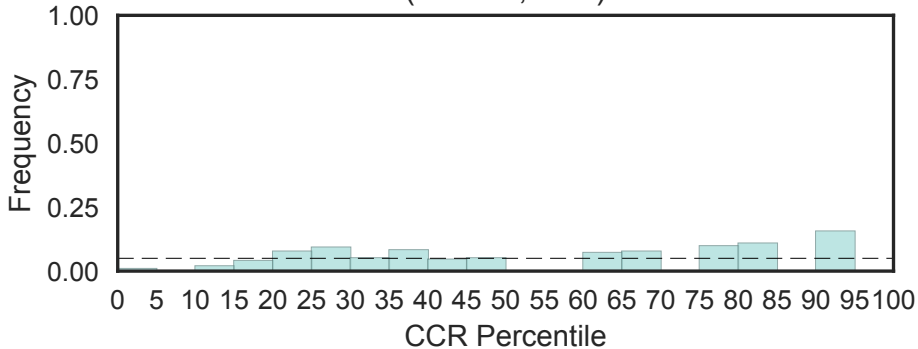



CSL zinc finger  
(zf-CSL, N=2)

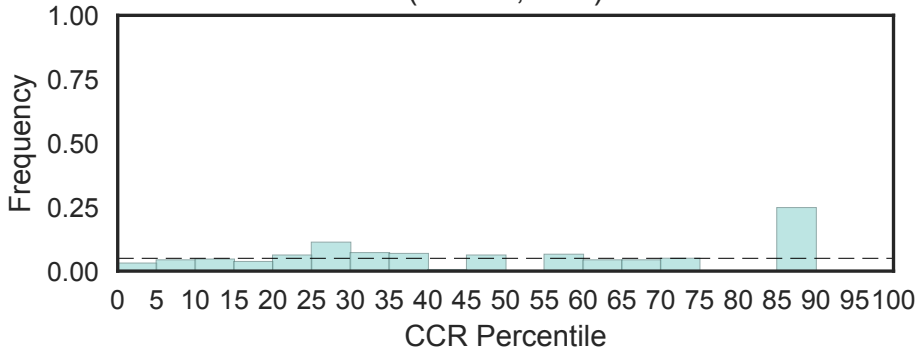

CW-type Zinc Finger  
(zf-CW, N=6)

Fisher's OR: 2.49; Bonferroni p-val: 1

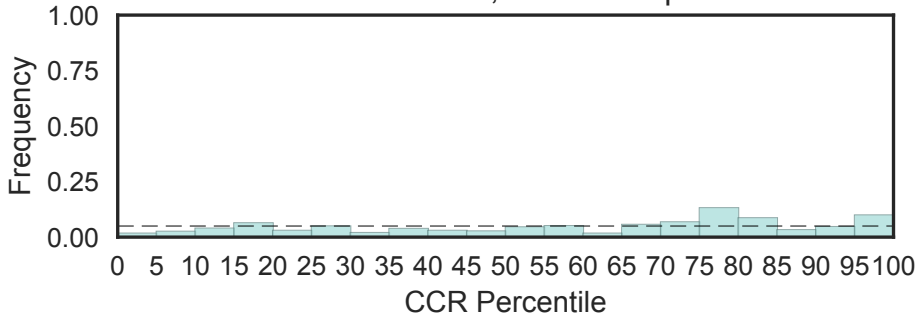

CXXC zinc finger domain  
(zf-CXXC, N=12)

Fisher's OR: 17; Bonferroni p-val: 5.71e-09

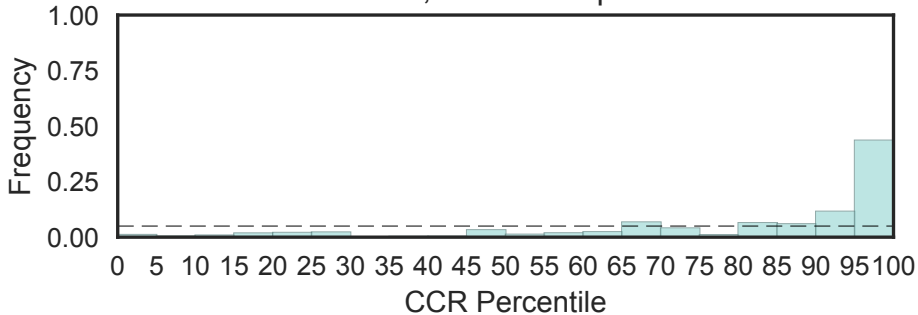

CpG binding protein zinc finger C terminal domain  
(zf-CpG\_bind\_C, N=1)

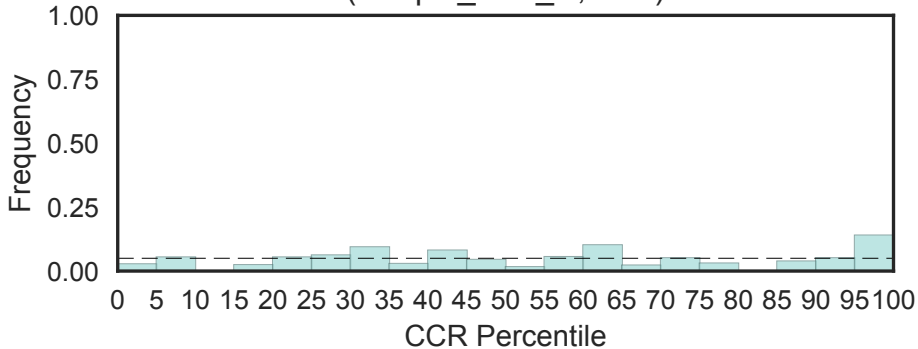

DBF zinc finger  
(zf-DBF, N=3)

Fisher's OR: 2.77; Bonferroni p-val: 1

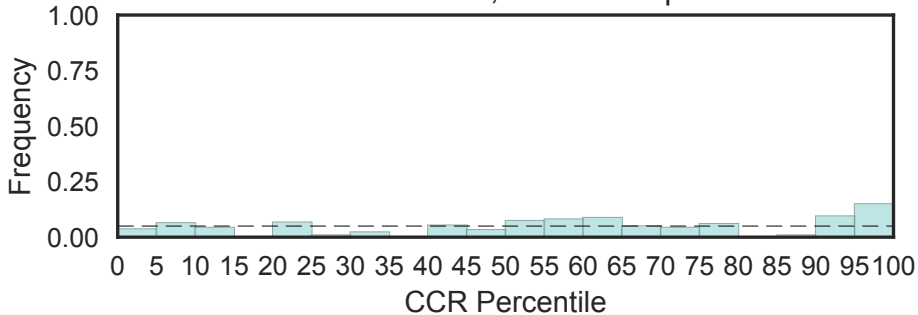

DNL zinc finger  
(zf-DNL, N=1)

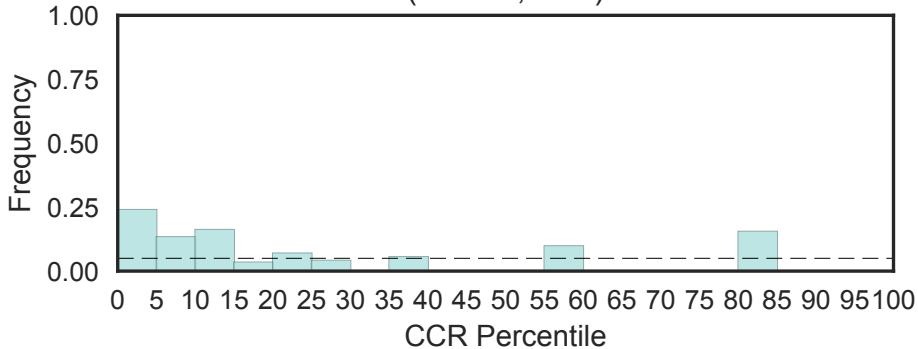

Drought induced 19 protein (Di19), zinc-binding  
(zf-Di19, N=7)

Fisher's OR: 5.41; Bonferroni p-val: 1

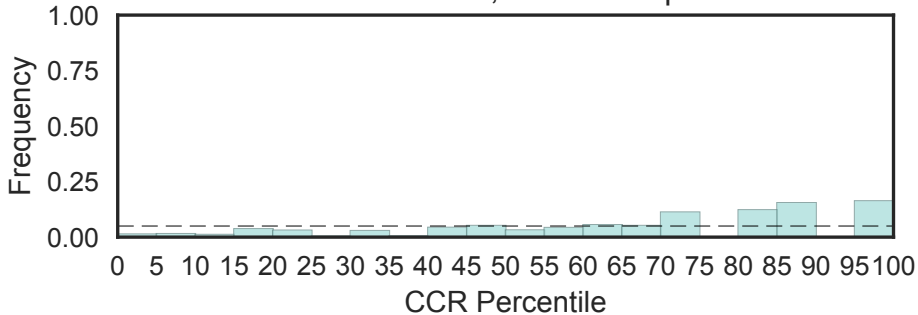

MYM-type Zinc finger with FCS sequence motif  
(zf-FCS, N=22)

Fisher's OR: 3.12; Bonferroni p-val: 1

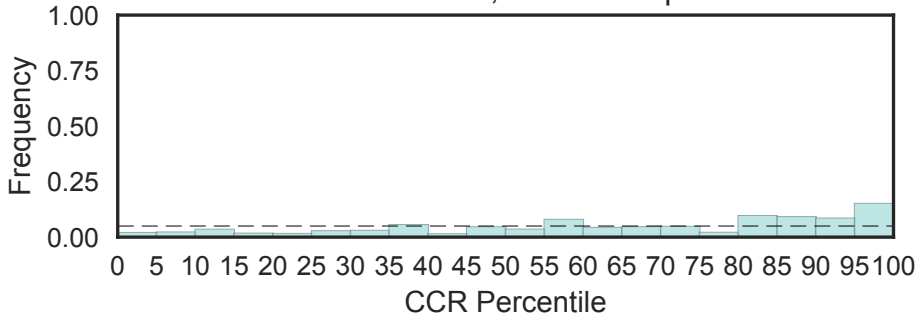



Zinc finger found in FPG and IleRS  
(zf-FPG\_IleRS, N=1)

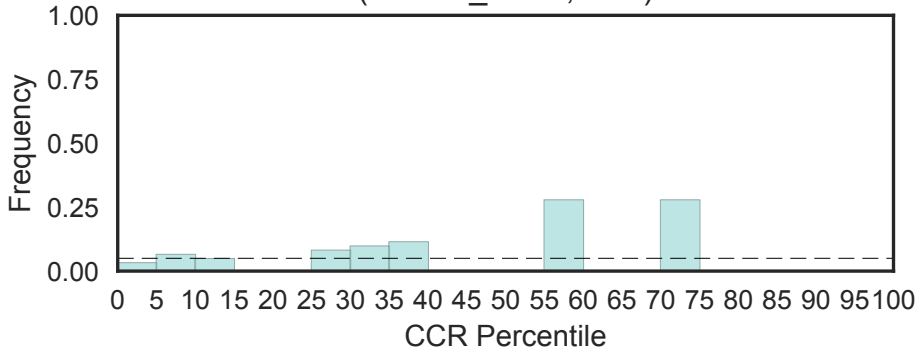

GRF zinc finger  
(zf-GRF, N=8)

Fisher's OR: 0; Bonferroni p-val: 1

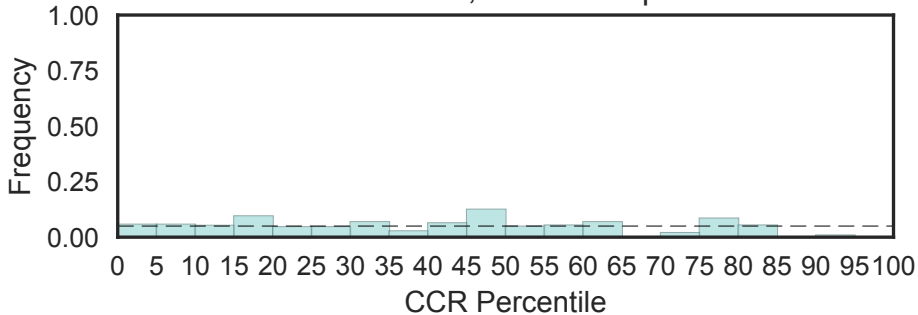

His(2)-Cys(2) zinc finger  
(zf-H2C2, N=1)

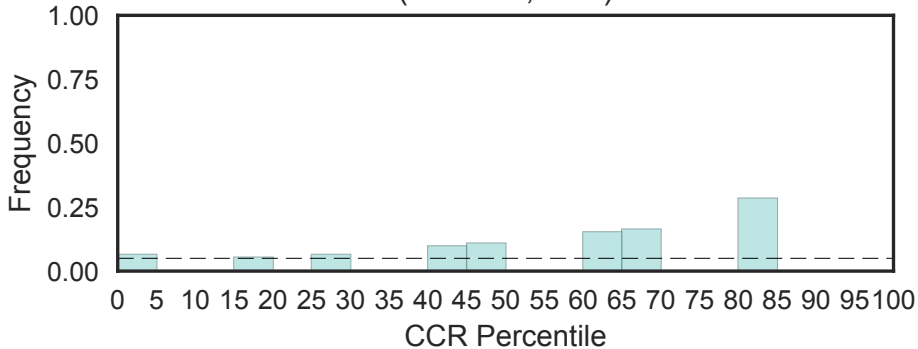

Zinc-finger double domain  
(zf-H2C2\_2, N=22)

Fisher's OR: 0.584; Bonferroni p-val: 1

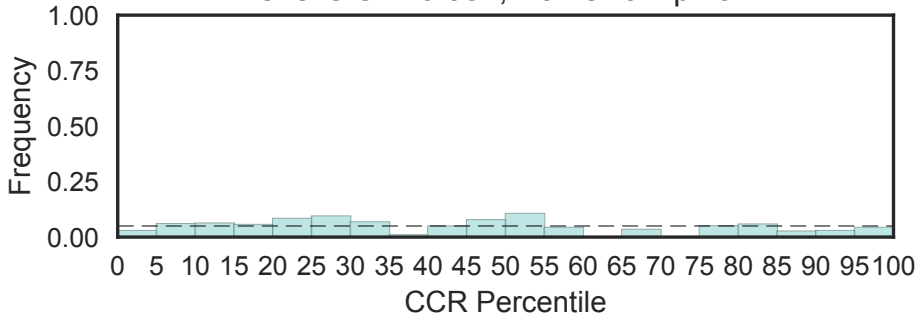

C2H2-type zinc-finger domain  
(zf-H2C2\_5, N=21)

Fisher's OR: 7.39; Bonferroni p-val: 0.137

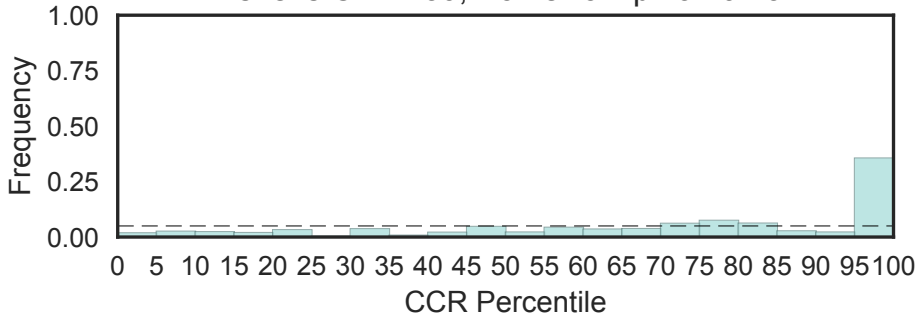

PHD-like zinc-binding domain  
(zf-HC5HC2H, N=22)

Fisher's OR: 6.61; Bonferroni p-val: 1.46e-08

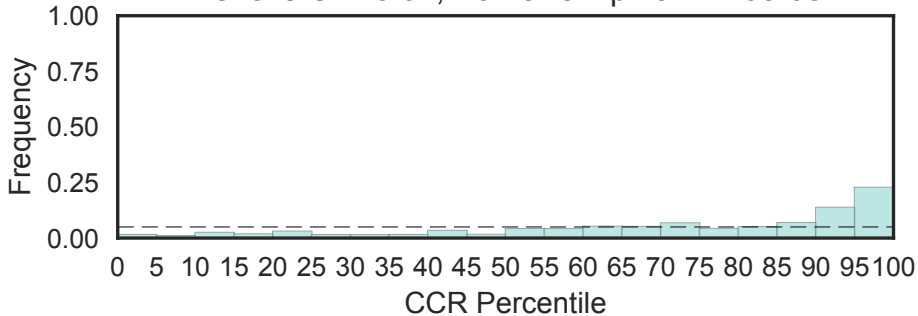

PHD-zinc-finger like domain  
(zf-HC5HC2H\_2, N=22)

Fisher's OR: 5.25; Bonferroni p-val: 3.01e-06

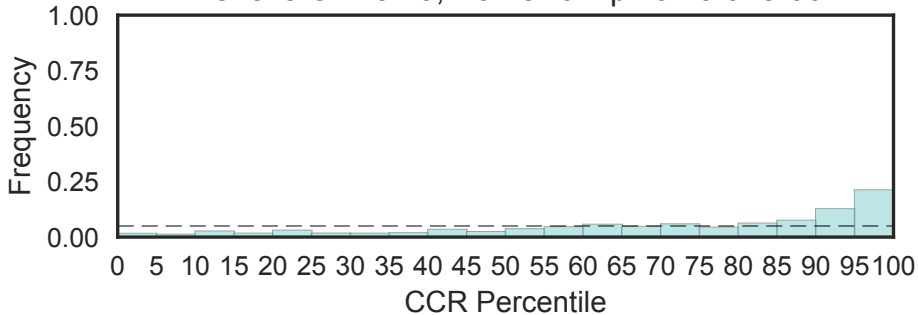

HIT zinc finger  
(zf-HIT, N=6)

Fisher's OR: 0; Bonferroni p-val: 1

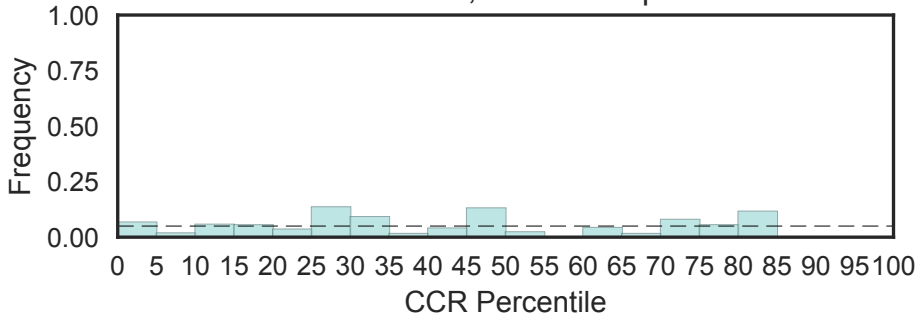



LITAF-like zinc ribbon domain  
(zf-LITAF-like, N=2)

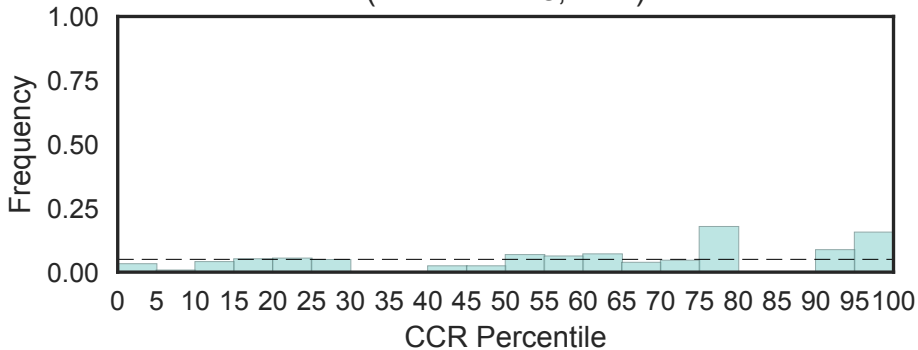

LYAR-type C2HC zinc finger  
(zf-LYAR, N=1)

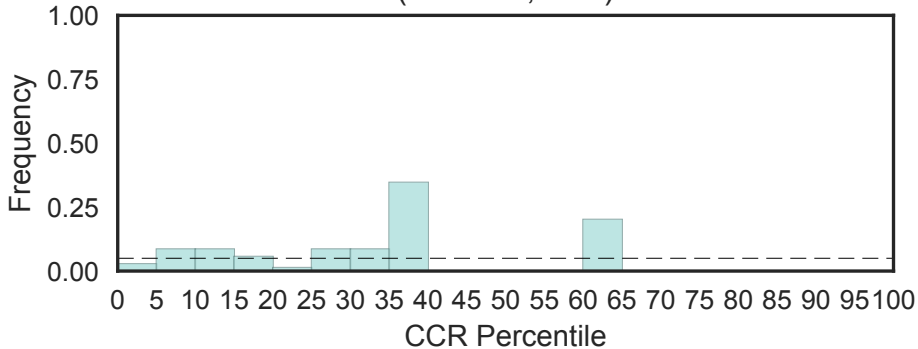

MIZ/SP-RING zinc finger  
(zf-MIZ, N=6)

Fisher's OR: 18.8; Bonferroni p-val: 0.000215

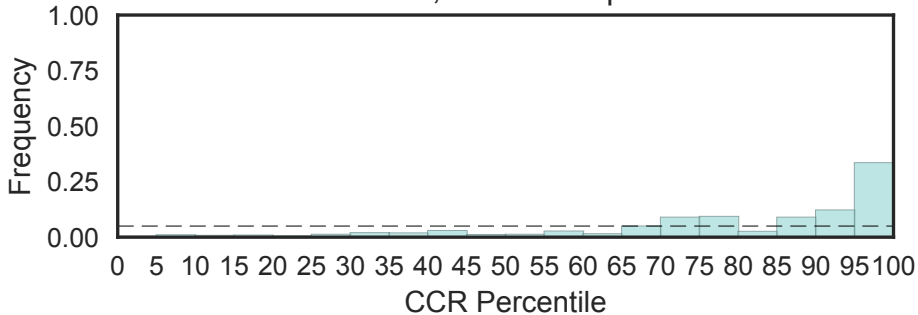

MYND finger  
(zf-MYND, N=20)

Fisher's OR: 1.79; Bonferroni p-val: 1

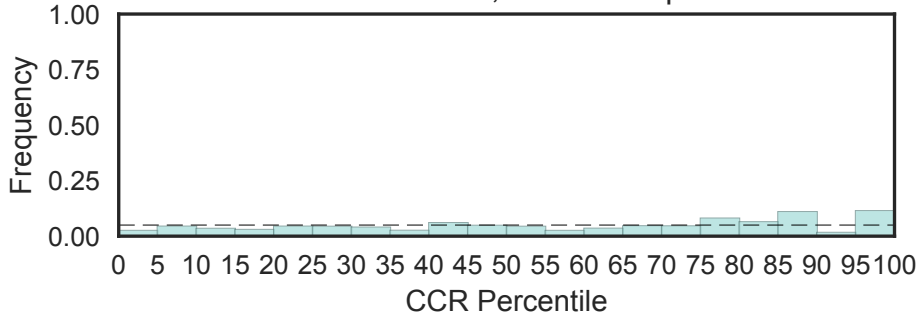

NADH pyrophosphatase zinc ribbon domain  
(zf-NADH-PPase, N=2)

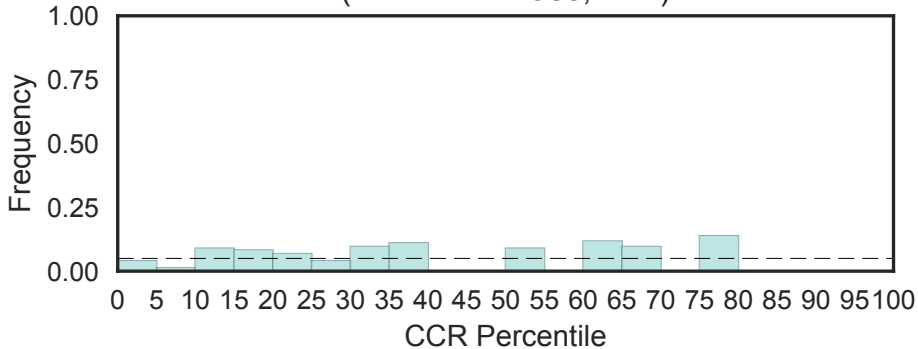

NF-X1 type zinc finger  
(zf-NF-X1, N=23)

Fisher's OR: 1.51; Bonferroni p-val: 1

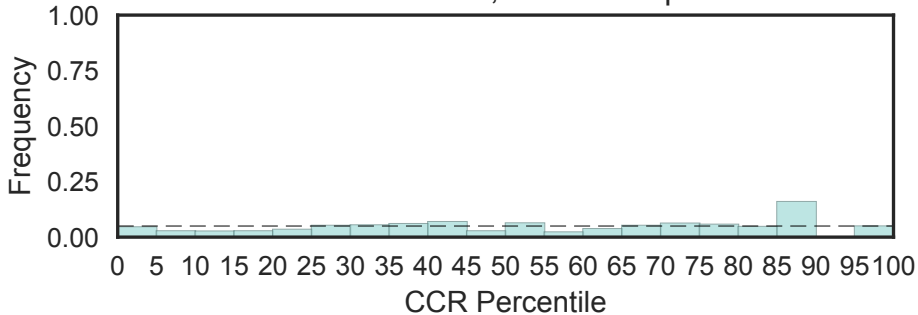

Zinc-finger of nitric oxide synthase-interacting protein  
(zf-NOSIP, N=1)

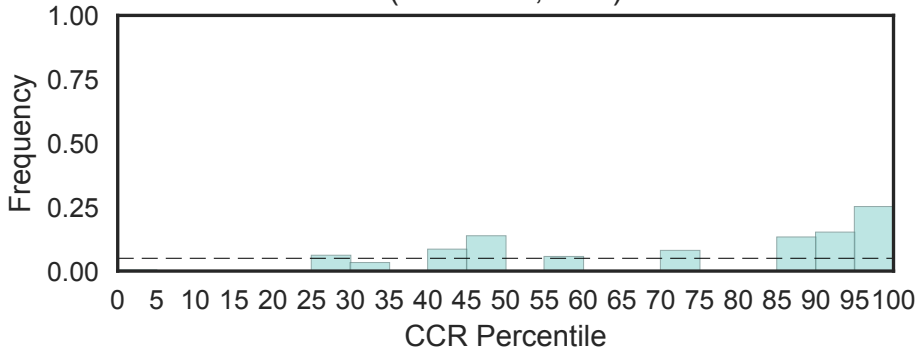

NPL4 family, putative zinc binding region  
(zf-NPL4, N=1)

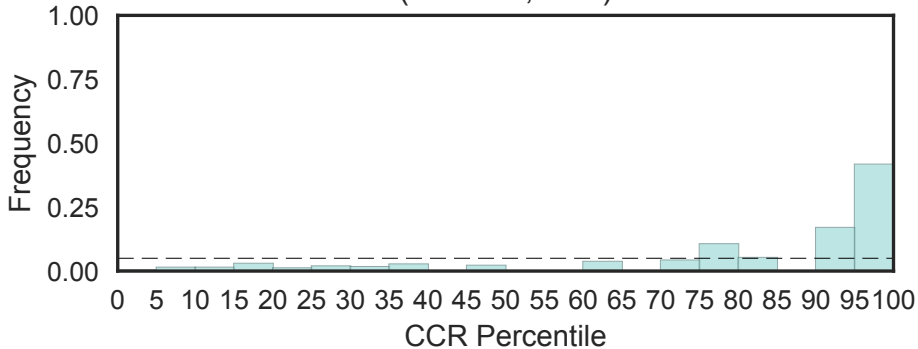



Zinc-finger of the MIZ type in Nse subunit  
(zf-Nse, N=1)

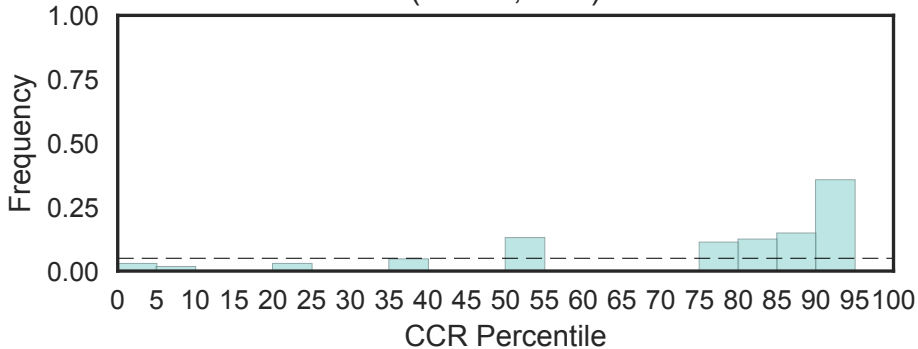

Poly(ADP-ribose) polymerase and DNA-Ligase Zn-finger region  
(zf-PARP, N=3)

Fisher's OR: 0; Bonferroni p-val: 1

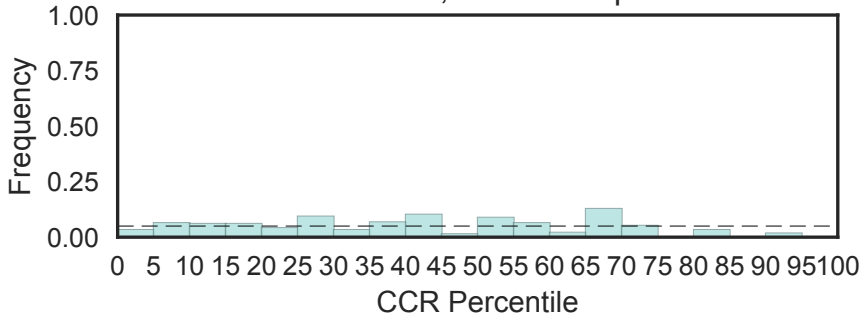

Recombination-activating protein 1 zinc-finger domain  
(zf-RAG1, N=1)

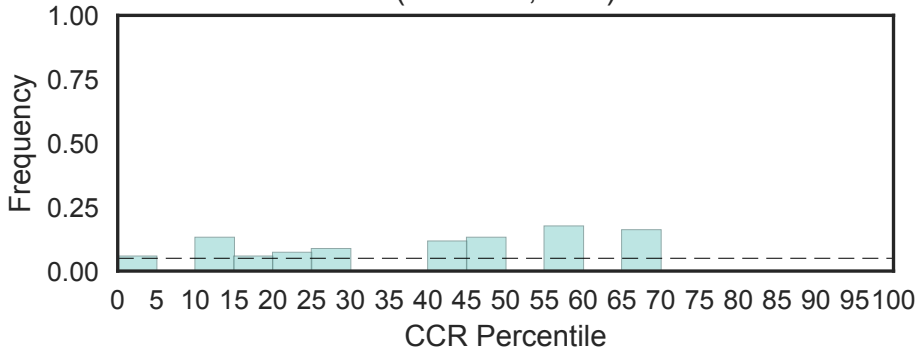

RING-like domain  
(zf-RING-like, N=1)

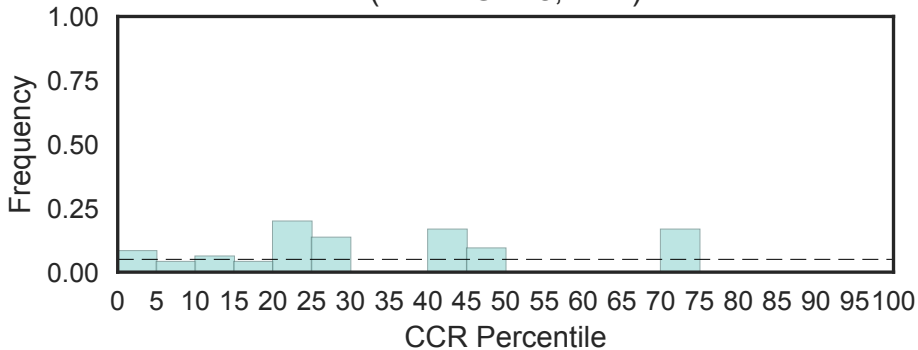

zinc RING finger of MSL2  
(zf-RING\_10, N=1)

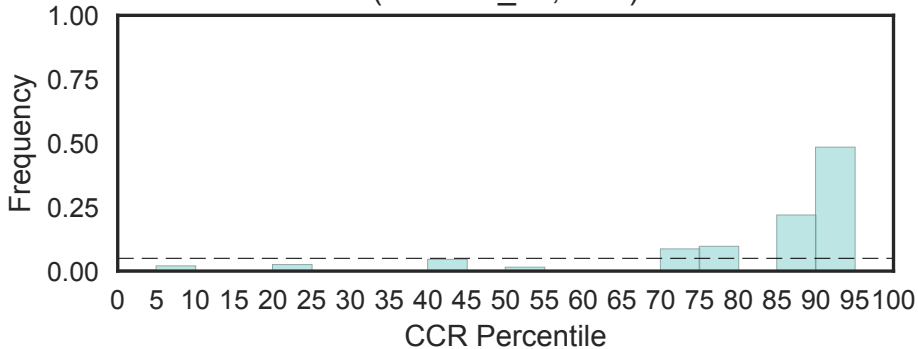

RING-like zinc finger  
(zf-RING\_11, N=26)

Fisher's OR: 2.75; Bonferroni p-val: 1

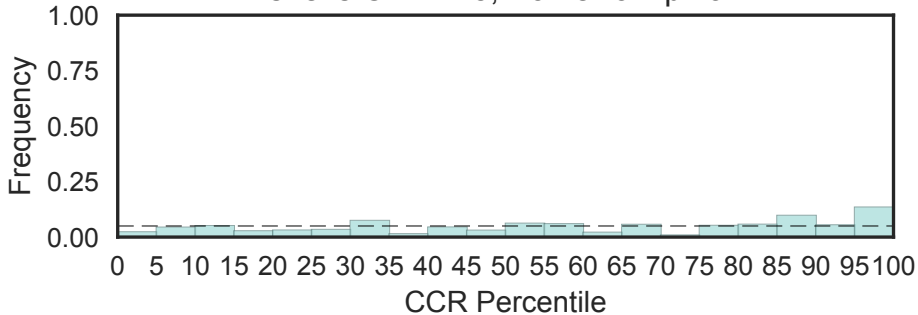

Ring finger domain  
(zf-RING\_2, N=125)

Fisher's OR: 2.35; Bonferroni p-val: 0.0828

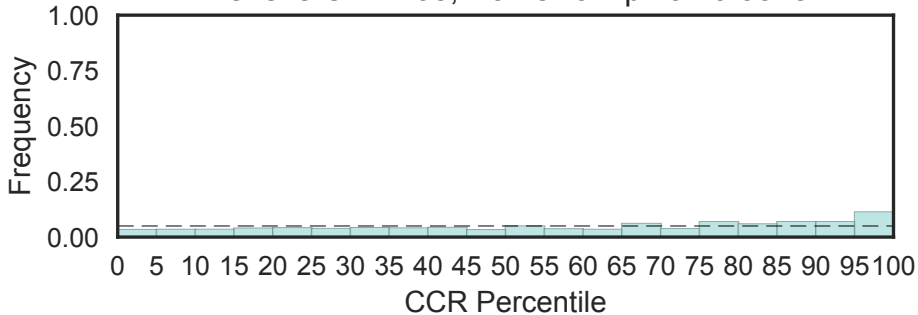

RING/Ubox like zinc-binding domain  
(zf-RING\_4, N=1)

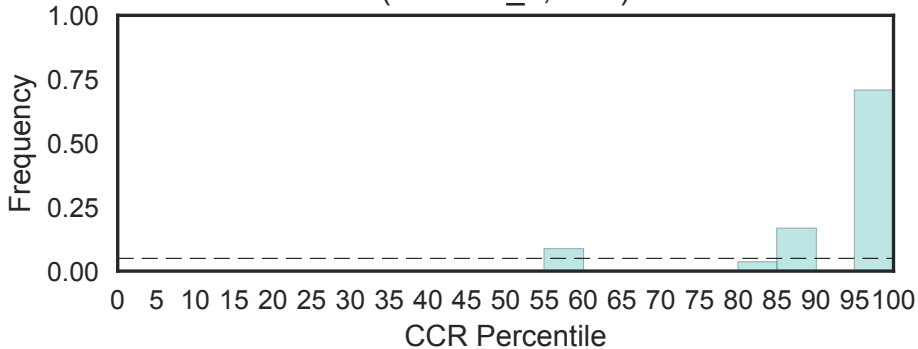



zinc-RING finger domain  
(zf-RING\_5, N=41)

Fisher's OR: 1.1; Bonferroni p-val: 1

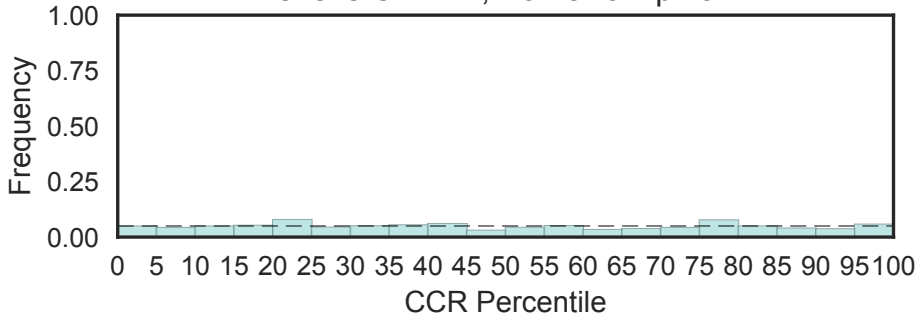

zf-RING of BARD1-type protein  
(zf-RING\_6, N=1)

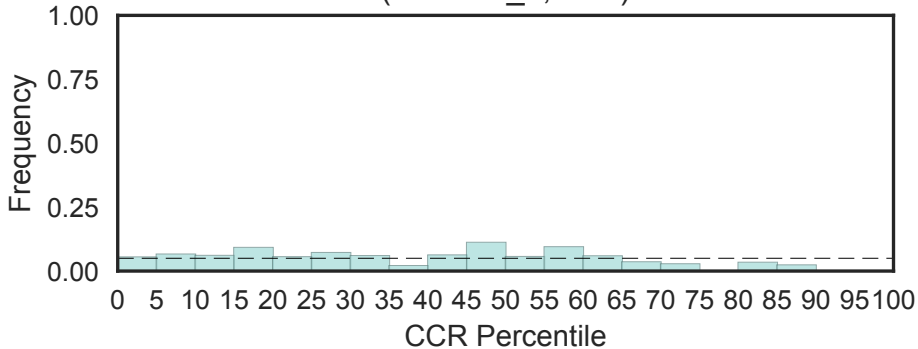

Putative zinc-RING and/or ribbon  
(zf-RING\_9, N=5)  
Fisher's OR: 0.761; Bonferroni p-val: 1

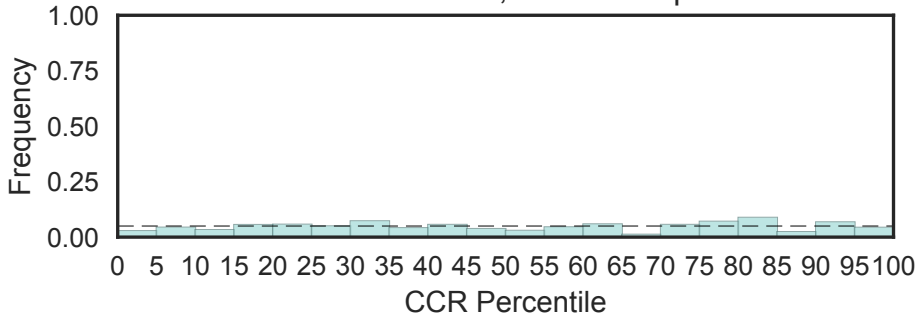

RING-type zinc-finger  
(zf-RING\_UBOX, N=181)

Fisher's OR: 2.51; Bonferroni p-val: 0.000699

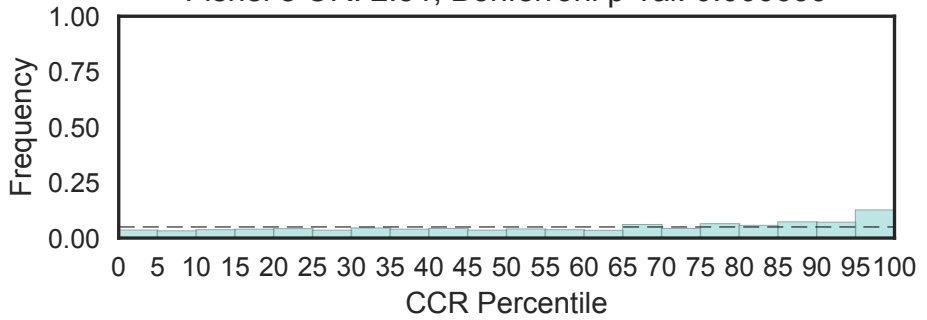

RNPHF zinc finger  
(zf-RNPHF, N=2)

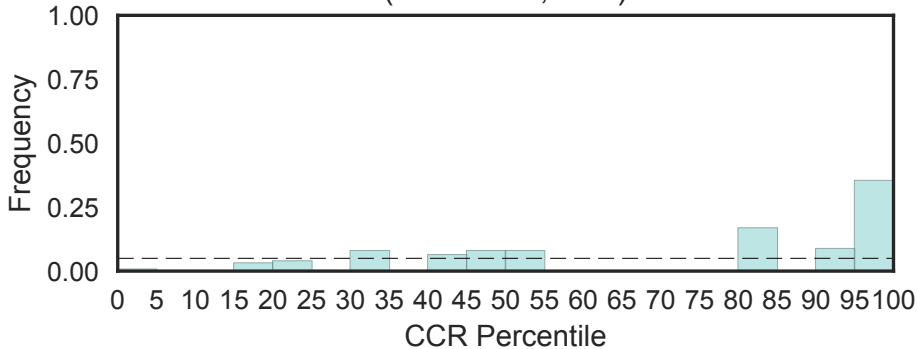

Zinc-finger of RNA-polymerase I-specific TFIIIB, Rrn7  
(zf-RRN7, N=1)

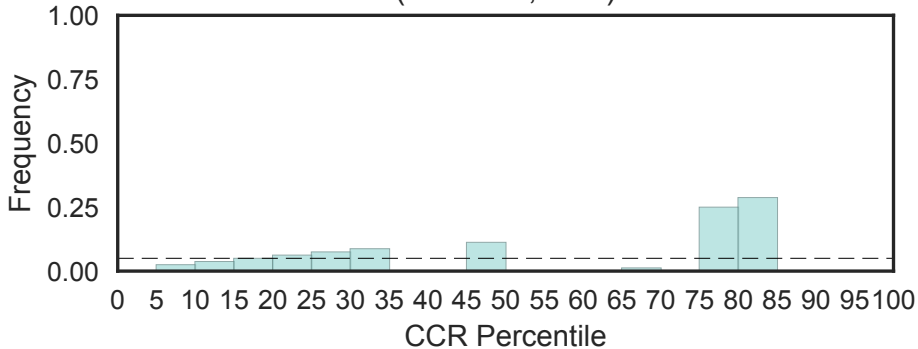

Zn-finger in Ran binding protein and others  
(zf-RanBP, N=36)

Fisher's OR: 3.97; Bonferroni p-val: 1

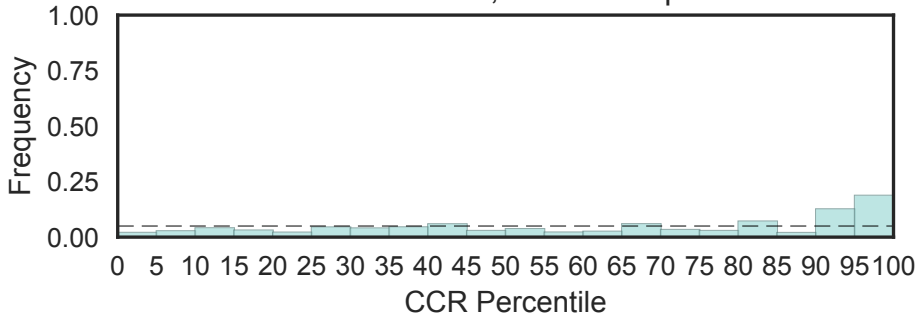

SAP30 zinc-finger  
(zf-SAP30, N=2)

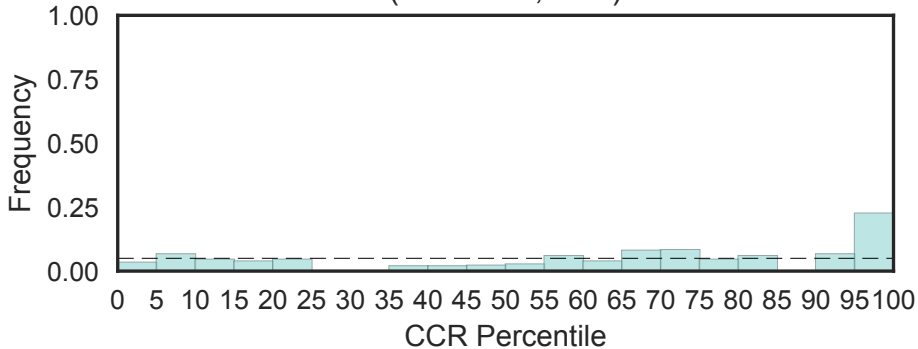



Zinc-finger of sodium channel modifier 1  
(zf-SCNM1, N=1)

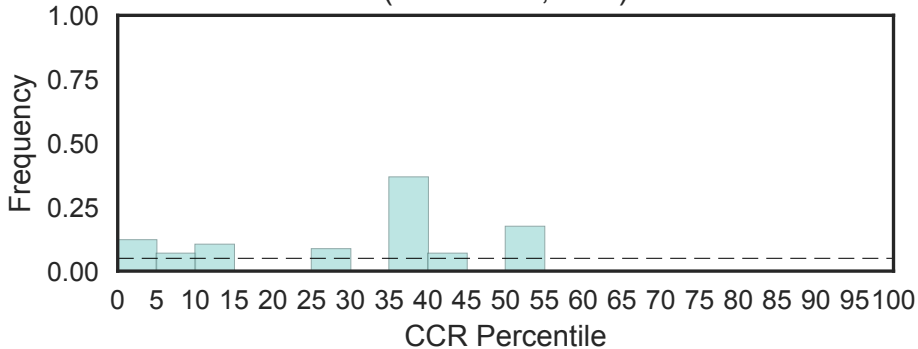

snRNA-activating protein of 50kDa MW C terminal  
(zf-SNAP50\_C, N=1)

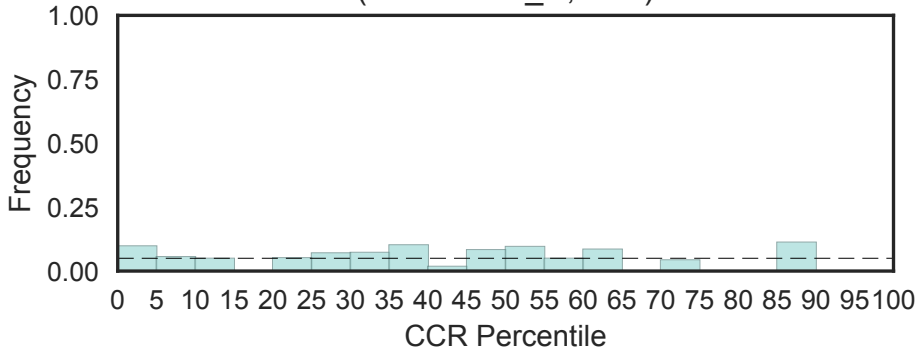

Sec23/Sec24 zinc finger  
(zf-Sec23\_Sec24, N=6)

Fisher's OR: 0; Bonferroni p-val: 1

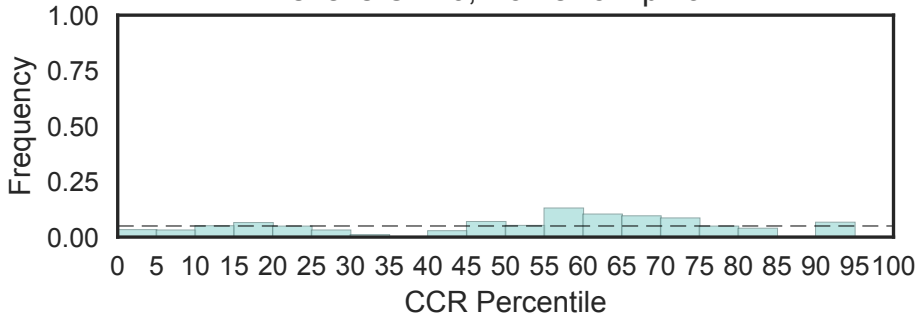

TAZ zinc finger  
(zf-TAZ, N=4)

Fisher's OR: 22.3; Bonferroni p-val: 0.000563

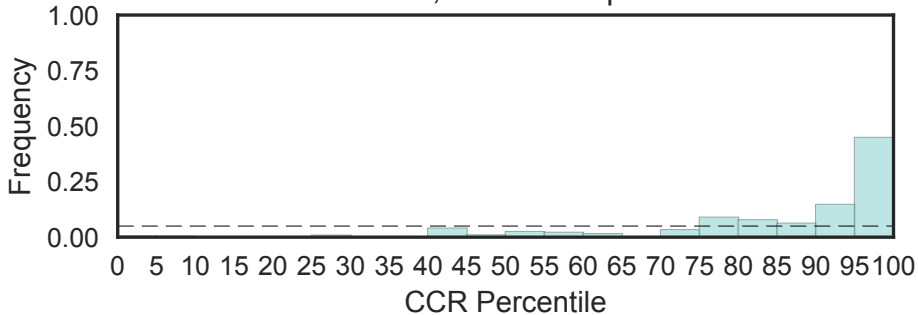

Putative zinc-finger of transcription factor IIC complex  
(zf-TFIIC, N=1)

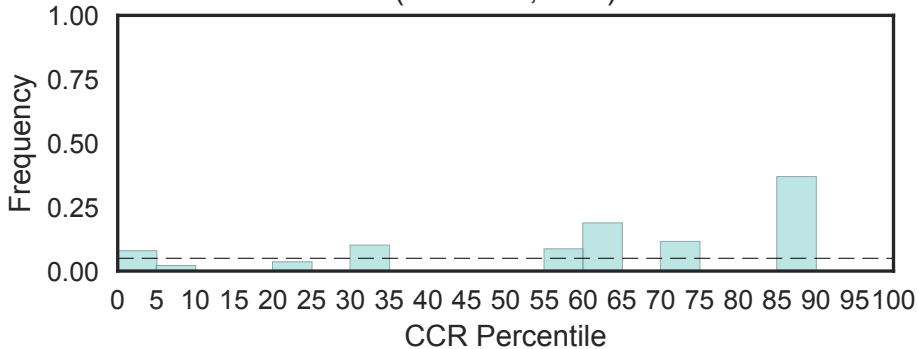

TRAF-type zinc finger  
(zf-TRAF, N=10)

Fisher's OR: 0; Bonferroni p-val: 1

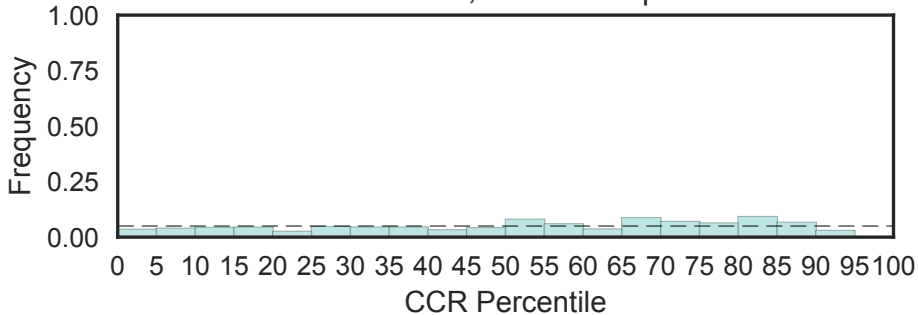

TRAF-like zinc-finger  
(zf-TRAF\_2, N=2)

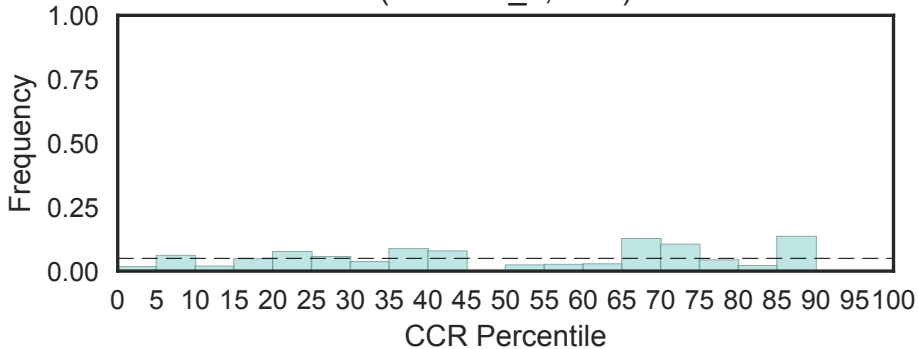

CCCH zinc finger in TRM13 protein  
(zf-TRM13\_CCCH, N=1)

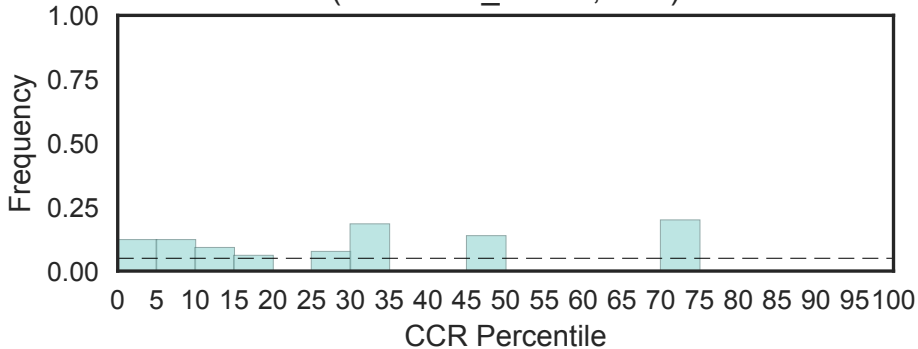



Tim10/DDP family zinc finger  
(zf-Tim10\_DDP, N=5)  
Fisher's OR: 0; Bonferroni p-val: 1

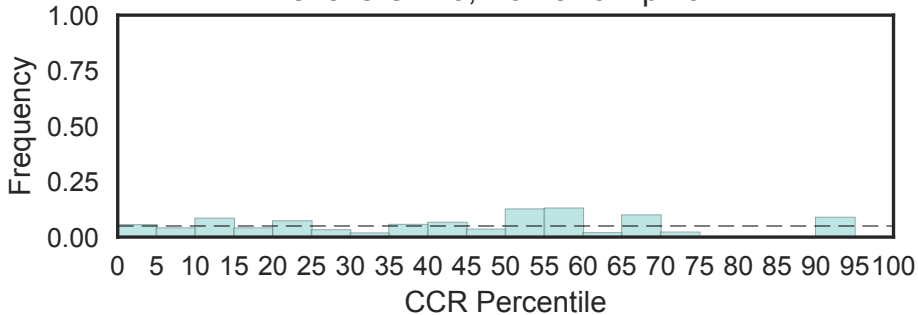

U1 zinc finger  
(zf-U1, N=3)

Fisher's OR: 5.41; Bonferroni p-val: 1

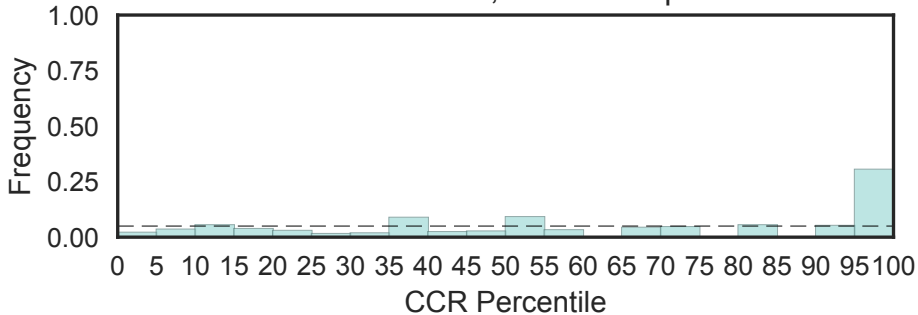

U11-48K-like CHHC zinc finger  
(zf-U11-48K, N=6)

Fisher's OR: 0; Bonferroni p-val: 1

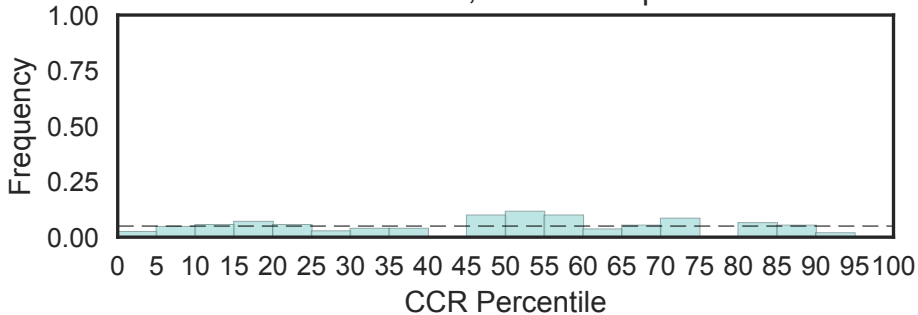

Zn-finger in ubiquitin-hydrolases and other protein  
(zf-UBP, N=12)

Fisher's OR: 2.15; Bonferroni p-val: 1

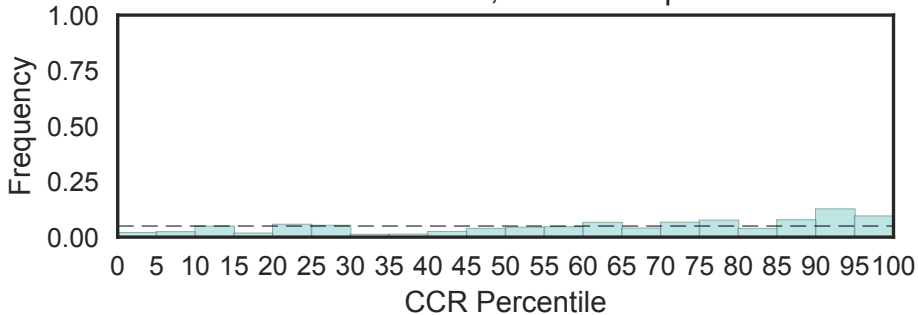

Putative zinc finger in N-recognin (UBR box)  
(zf-UBR, N=7)

Fisher's OR: 14.9; Bonferroni p-val: 0.00108

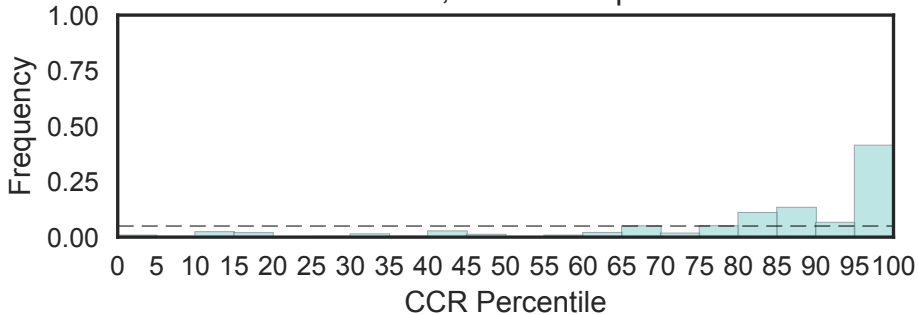

ZPR1 zinc-finger domain  
(zf-ZPR1, N=2)

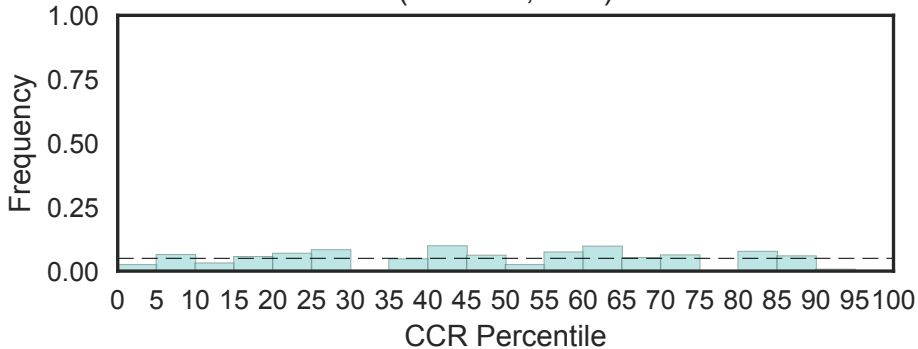

Zinc-finger of C2H2 type  
(zf-met, N=394)

Fisher's OR: 2.65; Bonferroni p-val: 5.78e-08

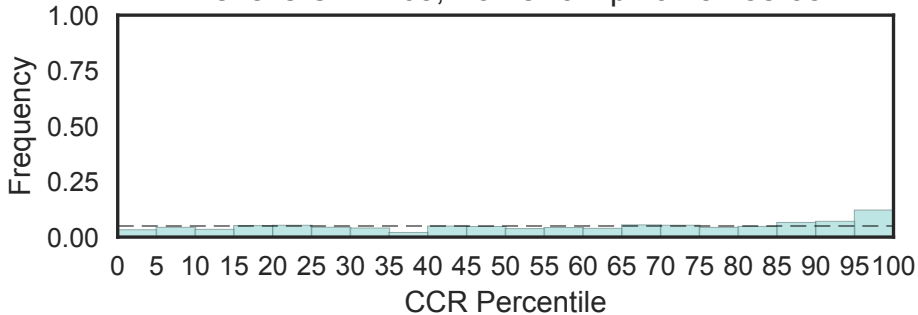

Nanos RNA binding domain  
(zf-nanos, N=3)

Fisher's OR: 2.3; Bonferroni p-val: 1

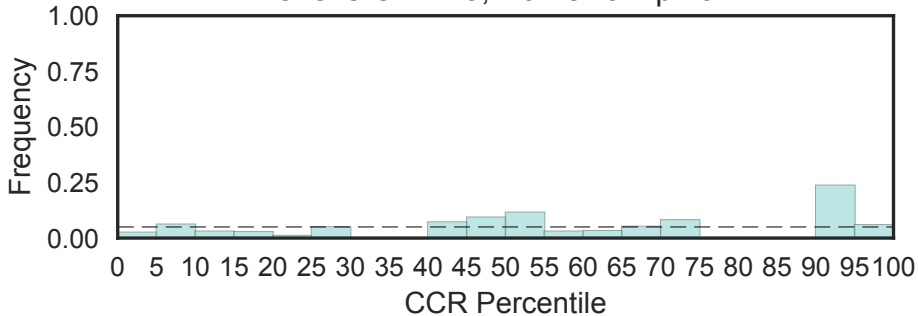



Piccolo Zn-finger  
(zf-piccolo, N=4)

Fisher's OR: 1.39; Bonferroni p-val: 1

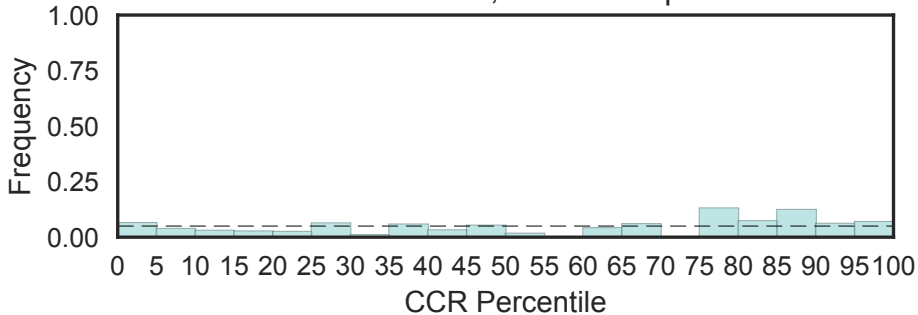

Primase zinc finger  
(zf-primase, N=1)

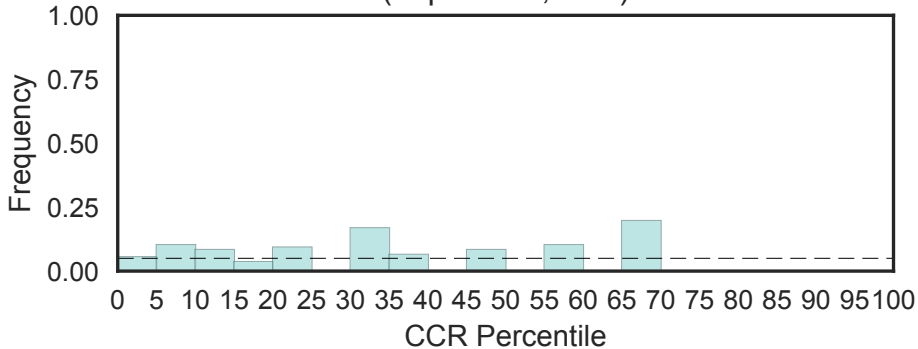

# RING-H2 zinc finger domain

(zf-rbx1, N=14)

Fisher's OR: 3.58; Bonferroni p-val: 1

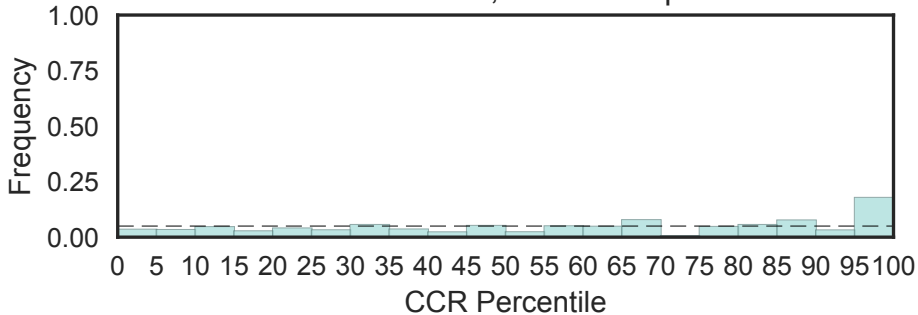

Putative treble-clef, zinc-finger, Zn-binding  
(zf-tcix, N=1)

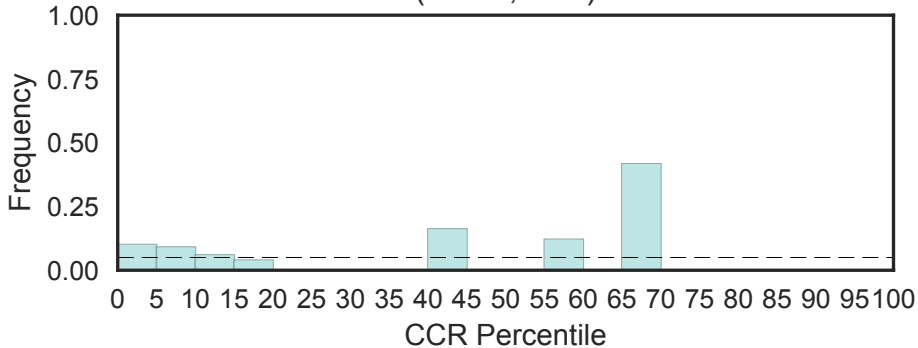

Predicted integral membrane zinc-ribbon metal-binding protein  
(zinc\_ribbon\_10, N=1)

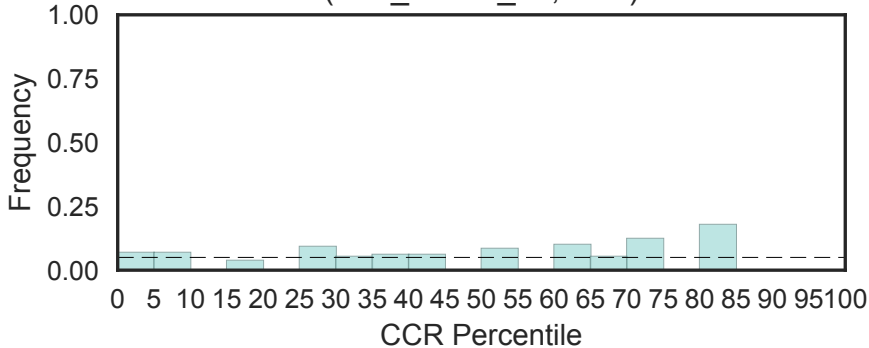

Zinc-ribbon like family  
(zinc\_ribbon\_16, N=2)

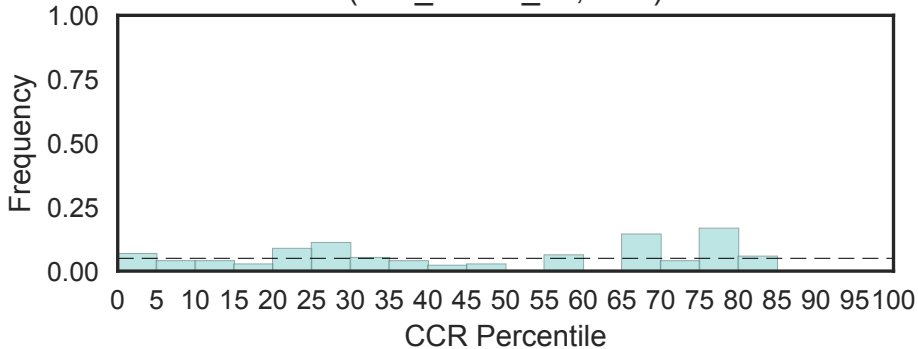

zinc-ribbon domain  
(zinc\_ribbon\_2, N=1)

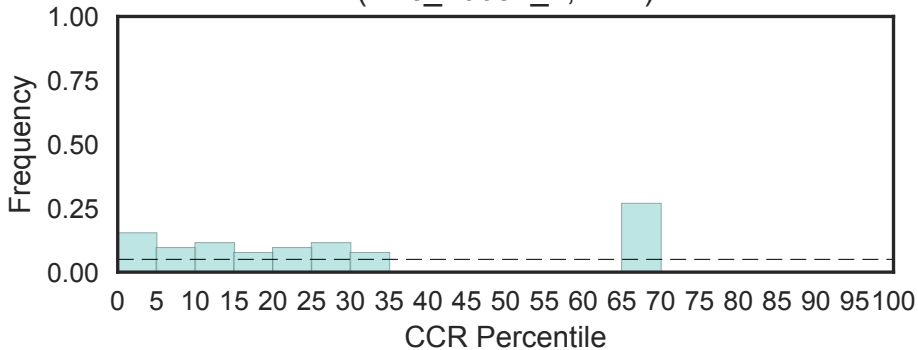

Zinc-ribbon  
(zinc\_ribbon\_6, N=1)

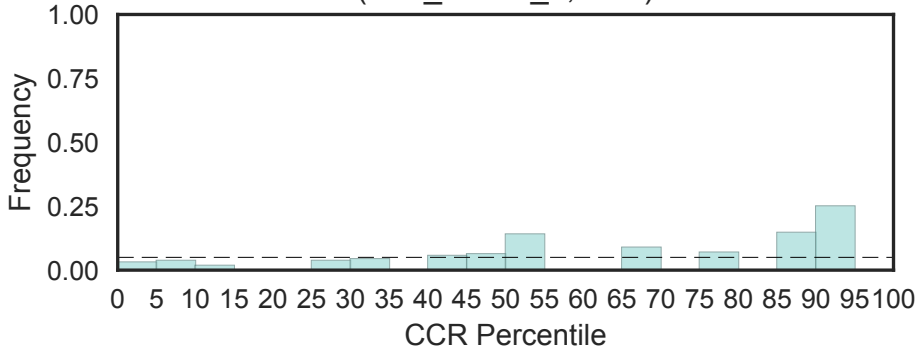



zinc-ribbon  
(zinc\_ribbon\_9, N=1)

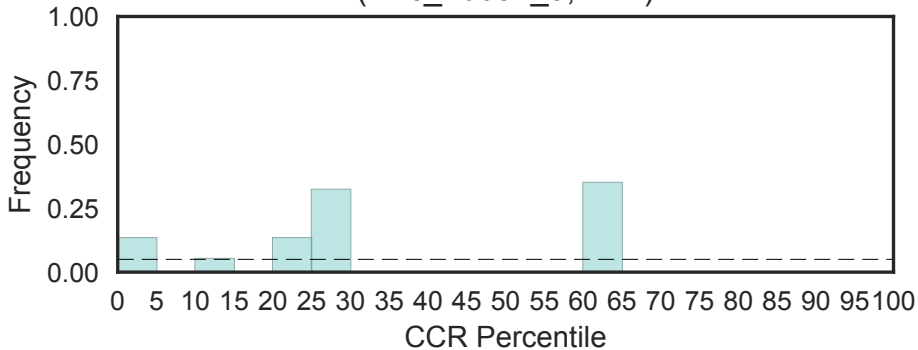

Supplement: NIHMS1034830-supplement-Supplementary_Data.pdf [file NIHMS1034830-supplement-Supplementary_Data.pdf]
